# Supplementary material for: Multi-modal molecular programs regulate melanoma cell state
Source: PubMed Central journal article supplement (PMC9271073; doi:10.1038/s41467-022-31510-1), 2022-07-09

**Supplementary Data 8: MEL gene regulatory influences - TCGA melanomas.**

# PMEL

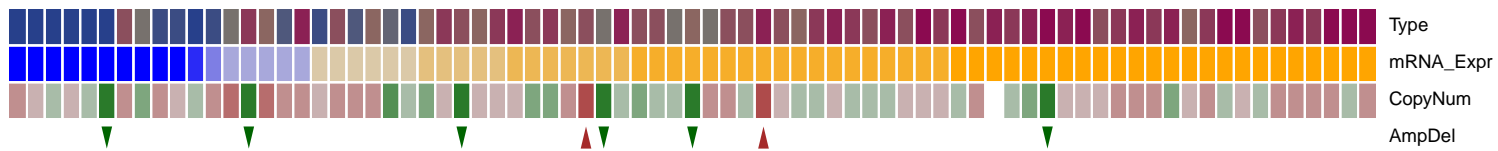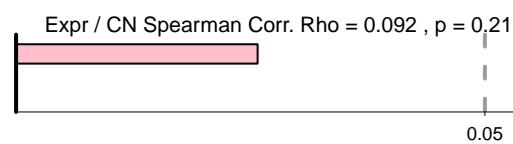

12 : 56368226  
 12 : 56368138  
 12 : 56367828  
 12 : 56367818  
 12 : 56367798  
 12 : 56367689  
 12 : 56367680  
 12 : 56367262  
 12 : 56367227  
 12 : 56367210  
 12 : 56365894  
 12 : 56365823  
 12 : 56364837  
 12 : 56361238  
 12 : 56360908  
 12 : 56360787  
 12 : 56360715  
 12 : 56360681  
 12 : 56360607  
 12 : 56360480  
 12 : 56360414  
 12 : 56360229  
 12 : 56360171  
 12 : 56360065  
 12 : 56359916  
 12 : 56359450  
 12 : 56359406  
 12 : 56359210  
 12 : 56359158  
 12 : 56350385

GeneLoc  
 PromoterAssoc  
 CpIsland

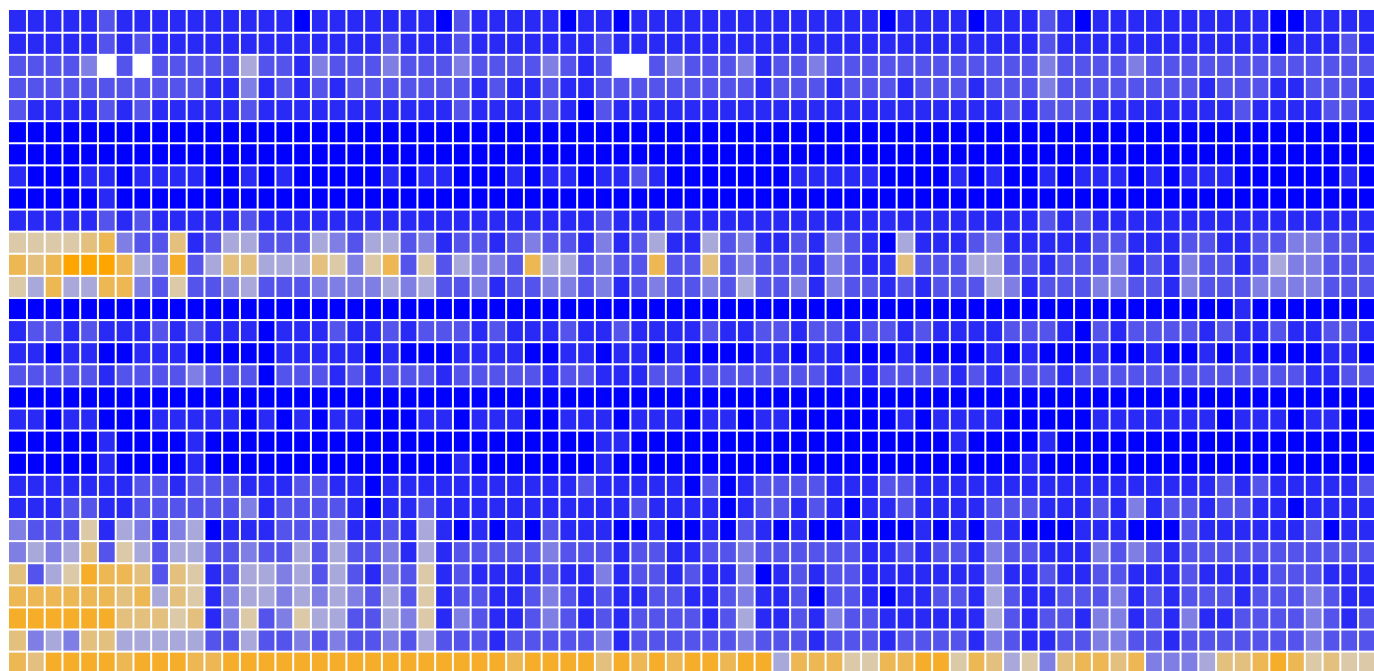

cg22708290  
 cg07965300  
 cg00164716  
 cg21041100  
 cg23594427  
 cg24693620  
 cg23200371  
 cg16167485  
 cg00611535  
 cg03511333  
 cg02826233  
 cg21074190  
 cg09596975  
 cg03330747  
 cg04108502  
 cg22781397  
 cg10581632  
 cg24914860  
 cg09304040  
 cg08548489  
 cg00129774  
 cg01221216  
 cg16325610  
 cg09106999  
 cg01810863  
 cg12377256  
 cg01574233  
 cg16190688  
 cg00635560  
 cg08869883

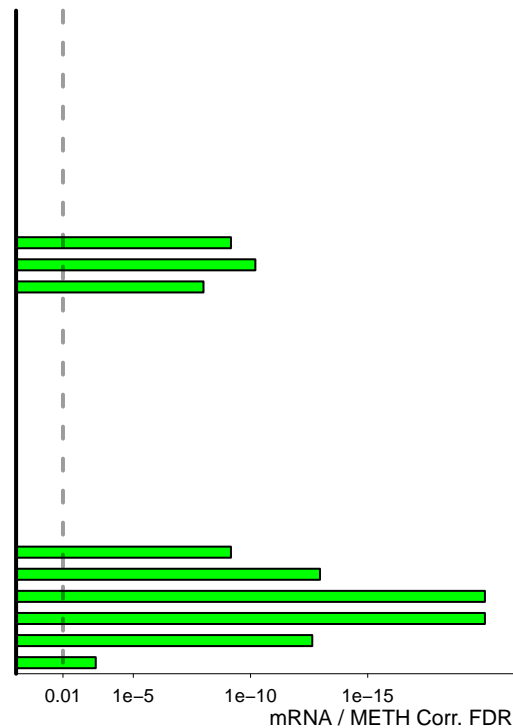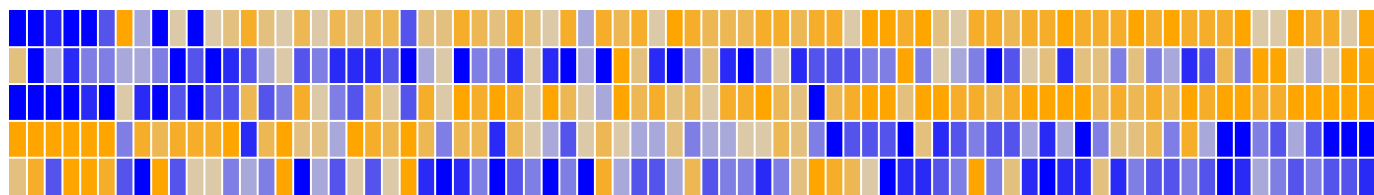

MITF  
 SOX10  
 TRPM1  
 ZEB1  
 AXL

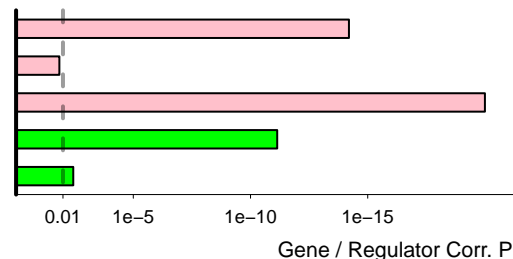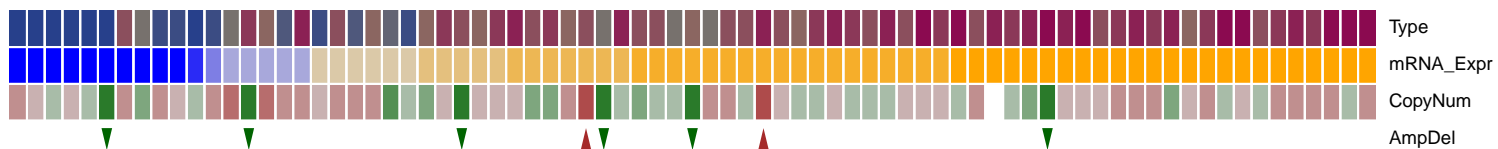

TCGA-D3-A1Q5-06  
 TCGA-FS-A1ZC-06  
 TCGA-ER-A42K-06  
 TCGA-EE-A2GO-06  
 TCGA-EE-A29A-06  
 TCGA-LH-A9OB-06  
 TCGA-YG-AA3P-06  
 TCGA-EE-A20C-06  
 TCGA-EE-A2MM-06  
 TCGA-WE-A87O-06  
 TCGA-EE-A20H-06  
 TCGA-EE-A378-06  
 TCGA-D3-A3C6-06  
 TCGA-EE-A37I-06  
 TCGA-FS-A4F5-06  
 TCGA-WE-A87M-06  
 TCGA-GN-A2G2-06  
 TCGA-D3-A3B2-06  
 TCGA-DA-A95Z-06  
 TCGA-ER-A15L-06  
 TCGA-FS-A4FE-06  
 TCGA-EE-A2A5-06  
 TCGA-WE-A8K6-06  
 TCGA-EE-A3J7-06  
 TCGA-D3-A8GP-06  
 TCGA-FS-A4F9-06  
 TCGA-FS-A1Z3-06  
 TCGA-FS-A1Z2-06  
 TCGA-FS-A1Z1-06  
 TCGA-W3-AA21-06  
 TCGA-FS-A1ZJ-06  
 TCGA-D3-A8GV-06  
 TCGA-FS-A1ZY-06  
 TCGA-D9-A1X3-06  
 TCGA-DA-A95W-06  
 TCGA-FW-A3I3-06  
 TCGA-D9-A6EC-06  
 TCGA-EE-A3AH-06  
 TCGA-PR-A7U8-06  
 TCGA-W3-A824-06  
 TCGA-GN-A268-06  
 TCGA-FS-A1ZE-06  
 TCGA-WE-A8JZ-06  
 TCGA-EE-A29E-06  
 TCGA-D3-A3ML-06  
 TCGA-3N-A9WE-06  
 TCGA-RP-A690-06  
 TCGA-EE-A3FS-06  
 TCGA-FS-A1Z7-06  
 TCGA-D3-A8GL-06  
 TCGA-EE-A28E-06  
 TCGA-D3-A8GK-06  
 TCGA-D3-A1Q1-06  
 TCGA-D3-A1Q8-07  
 TCGA-EE-A3AD-06  
 TCGA-GN-A8LK-06  
 TCGA-D9-A6EG-06  
 TCGA-GN-A4U7-06  
 TCGA-ER-A19F-06  
 TCGA-D3-A5GL-06  
 TCGA-EE-A180-06  
 TCGA-EE-A29D-06  
 TCGA-EE-A2GR-06  
 TCGA-FS-A1YW-06  
 TCGA-FS-A1ZK-06  
 TCGA-EE-A29L-06  
 TCGA-FS-A1ZG-06  
 TCGA-D3-A8GI-06  
 TCGA-FR-A8YD-06  
 TCGA-D9-A4Z6-06  
 TCGA-RP-A695-06  
 TCGA-EE-A185-06  
 TCGA-DA-A1IA-06  
 TCGA-GN-A8LL-06

Type  
 mRNA\_Expr  
 CopyNum  
 AmpDel

# MITF

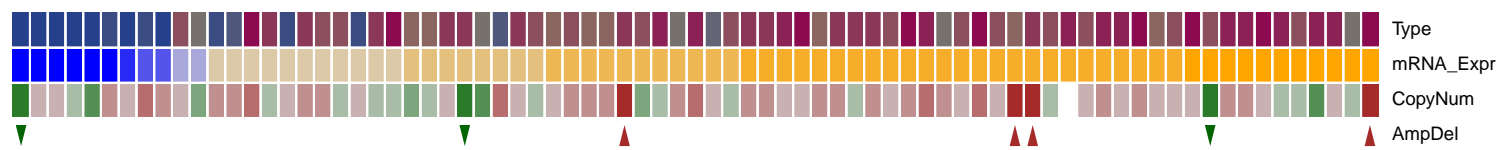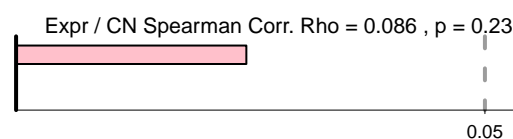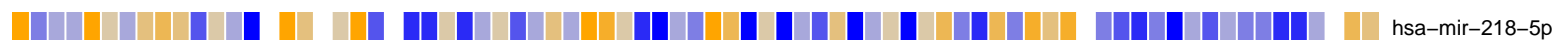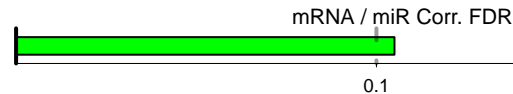

- 3 : 69788259
- 3 : 69788290
- 3 : 69788295
- 3 : 69788442
- 3 : 69788840
- 3 : 69788878
- 3 : 69788984
- 3 : 69789167
- 3 : 69789199
- 3 : 69792875
- 3 : 69797108
- 3 : 69811645
- 3 : 69812125
- 3 : 69812434
- 3 : 69812798
- 3 : 69812820
- 3 : 69812885
- 3 : 69812973
- 3 : 69819855
- 3 : 69824707
- 3 : 69834396
- 3 : 69859618
- 3 : 69914738
- 3 : 69915189
- 3 : 69915302
- 3 : 69915406
- 3 : 69915449
- 3 : 69924342
- 3 : 69925279
- 3 : 69927701
- 3 : 69928180
- 3 : 69928232
- 3 : 69932052
- 3 : 69942668
- 3 : 69974592
- 3 : 69985202
- 3 : 69985375
- 3 : 69985594
- 3 : 69990481
- 3 : 69997232
- 3 : 70008488
- 3 : 70008521
- 3 : 70008541
- 3 : 70016979

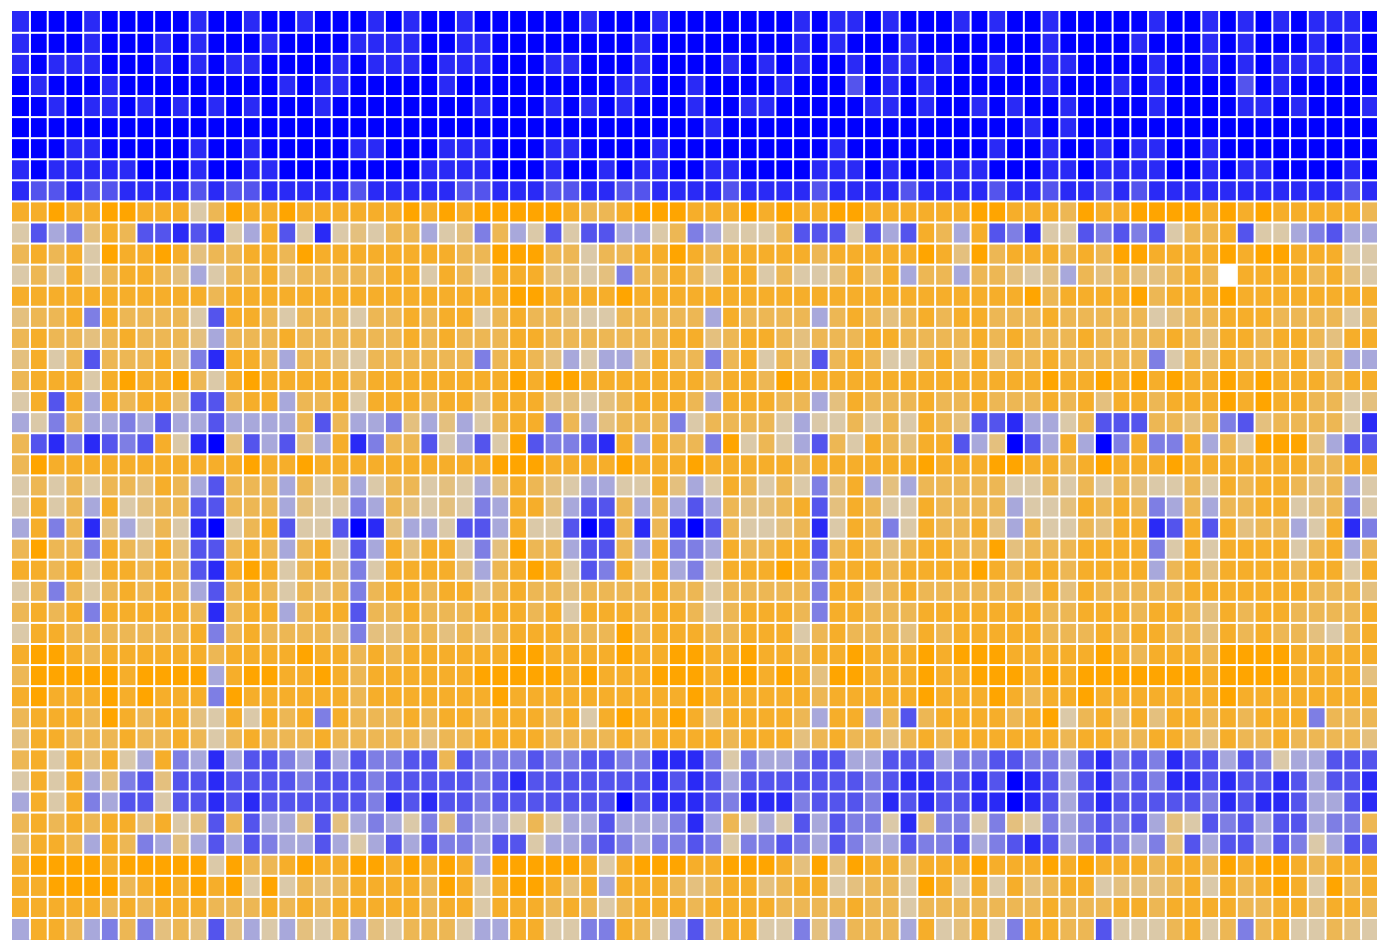

- cg10581281
- cg07231544
- cg05277991
- cg00838150
- cg14246617
- cg17997310
- cg08463543
- cg07884487
- cg07499607
- cg21178333
- cg18496212
- cg15909737
- cg15449049
- cg15023858
- cg06070625
- cg13685139
- cg09325003
- cg03847535
- cg03489020
- cg17482117
- cg04811592
- cg17445875
- cg11287400
- cg13151171
- cg03831180
- cg18503031
- cg13523819
- cg08652499
- cg01113900
- cg13264800
- cg00130817
- cg04535746
- cg03851970
- cg06789445
- cg01793161
- cg16905280
- cg11038507
- cg06640206
- cg13636907
- cg02643677
- cg12441997
- cg25129985
- cg09678667
- cg24874749

GeneLoc  
PromoterAssoc  
CpGIsland

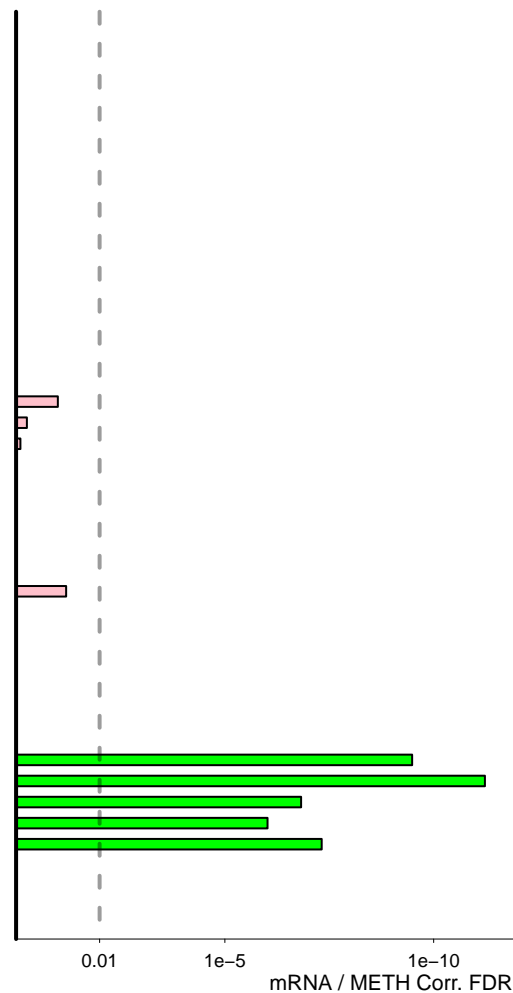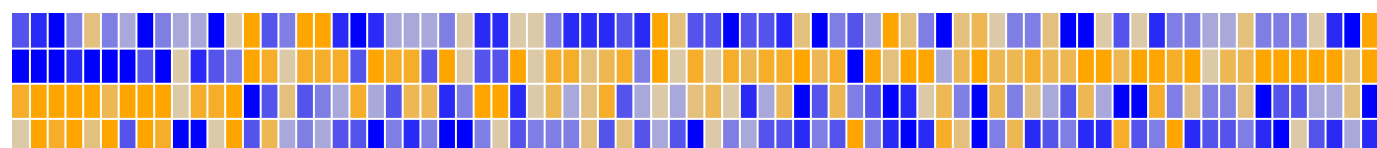

- SOX10
- TRPM1
- ZEB1
- AXL

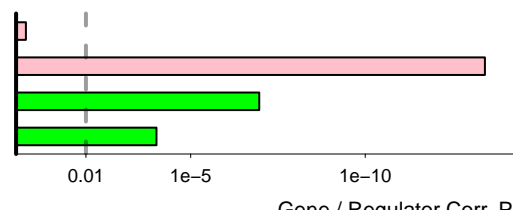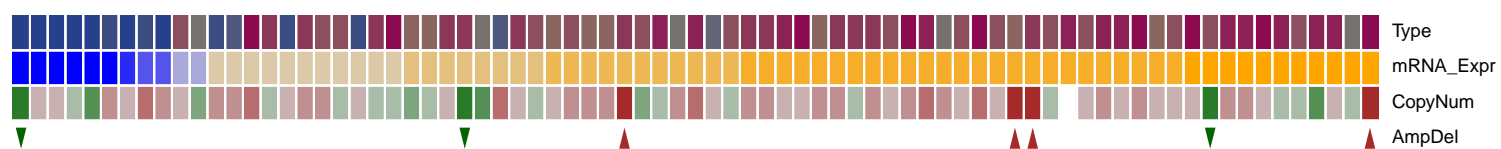

- TCGA-BE-A20H-06
- TCGA-BE-A2GO-06
- TCGA-FS-A1ZC-06
- TCGA-BE-A29A-06
- TCGA-D3-A1Q5-06
- TCGA-BE-A2MM-06
- TCGA-ER-A42K-06
- TCGA-WE-A8K6-06
- TCGA-LH-A9OB-06
- TCGA-D3-A8GV-06
- TCGA-BE-A20C-06
- TCGA-BE-A3J8-06
- TCGA-WE-A8ZM-06
- TCGA-DA-A1JA-06
- TCGA-3N-A9WB-06
- TCGA-D3-A3MO-06
- TCGA-ER-A8YL-06
- TCGA-D3-A8GL-06
- TCGA-DA-A95W-06
- TCGA-WE-A8ZQ-06
- TCGA-W3-AAZ1-06
- TCGA-D3-A8GK-06
- TCGA-BE-A3J7-06
- TCGA-FS-A4F5-06
- TCGA-D3-A8GP-06
- TCGA-D3-A3C6-06
- TCGA-ER-A19L-06
- TCGA-BE-A29B-06
- TCGA-FS-A1ZU-06
- TCGA-FR-A7U8-06
- TCGA-WE-A8JZ-06
- TCGA-FS-A4FB-06
- TCGA-D3-A1QA-06
- TCGA-DA-A95Z-06
- TCGA-FS-A1ZY-06
- TCGA-BE-A3AH-06
- TCGA-GN-A262-06
- TCGA-BE-A2A5-06
- TCGA-W3-A824-06
- TCGA-BE-A3J1-06
- TCGA-FS-A1ZK-06
- TCGA-FS-A1ZZ-06
- TCGA-GN-A4U7-06
- TCGA-FS-A1ZJ-06
- TCGA-BE-A29D-06
- TCGA-D3-A3ML-06
- TCGA-BE-A695-06
- TCGA-BE-A17Z-06
- TCGA-GN-A8LK-06
- TCGA-GN-A268-06
- TCGA-D3-A8GC-06
- TCGA-ER-A19F-06
- TCGA-BE-A29L-06
- TCGA-FS-A1ZE-06
- TCGA-D9-A6EC-06
- TCGA-D3-A5GL-06
- TCGA-D9-A1X3-06
- TCGA-D3-A1QA-07
- TCGA-FS-A4F9-06
- TCGA-BE-A3AD-06
- TCGA-BE-A29E-06
- TCGA-BE-A185-06
- TCGA-FS-A1YW-06
- TCGA-D3-A1Q1-06
- TCGA-D3-A8GL-06
- TCGA-YG-AA3P-06
- TCGA-BE-A2GR-06
- TCGA-BE-A180-06
- TCGA-FS-A1ZG-06
- TCGA-ER-A3ES-06
- TCGA-RP-A690-06
- TCGA-D9-A4Z6-06
- TCGA-D9-A6EG-06
- TCGA-FW-A3I3-06
- TCGA-GN-A8LL-06

# TYR

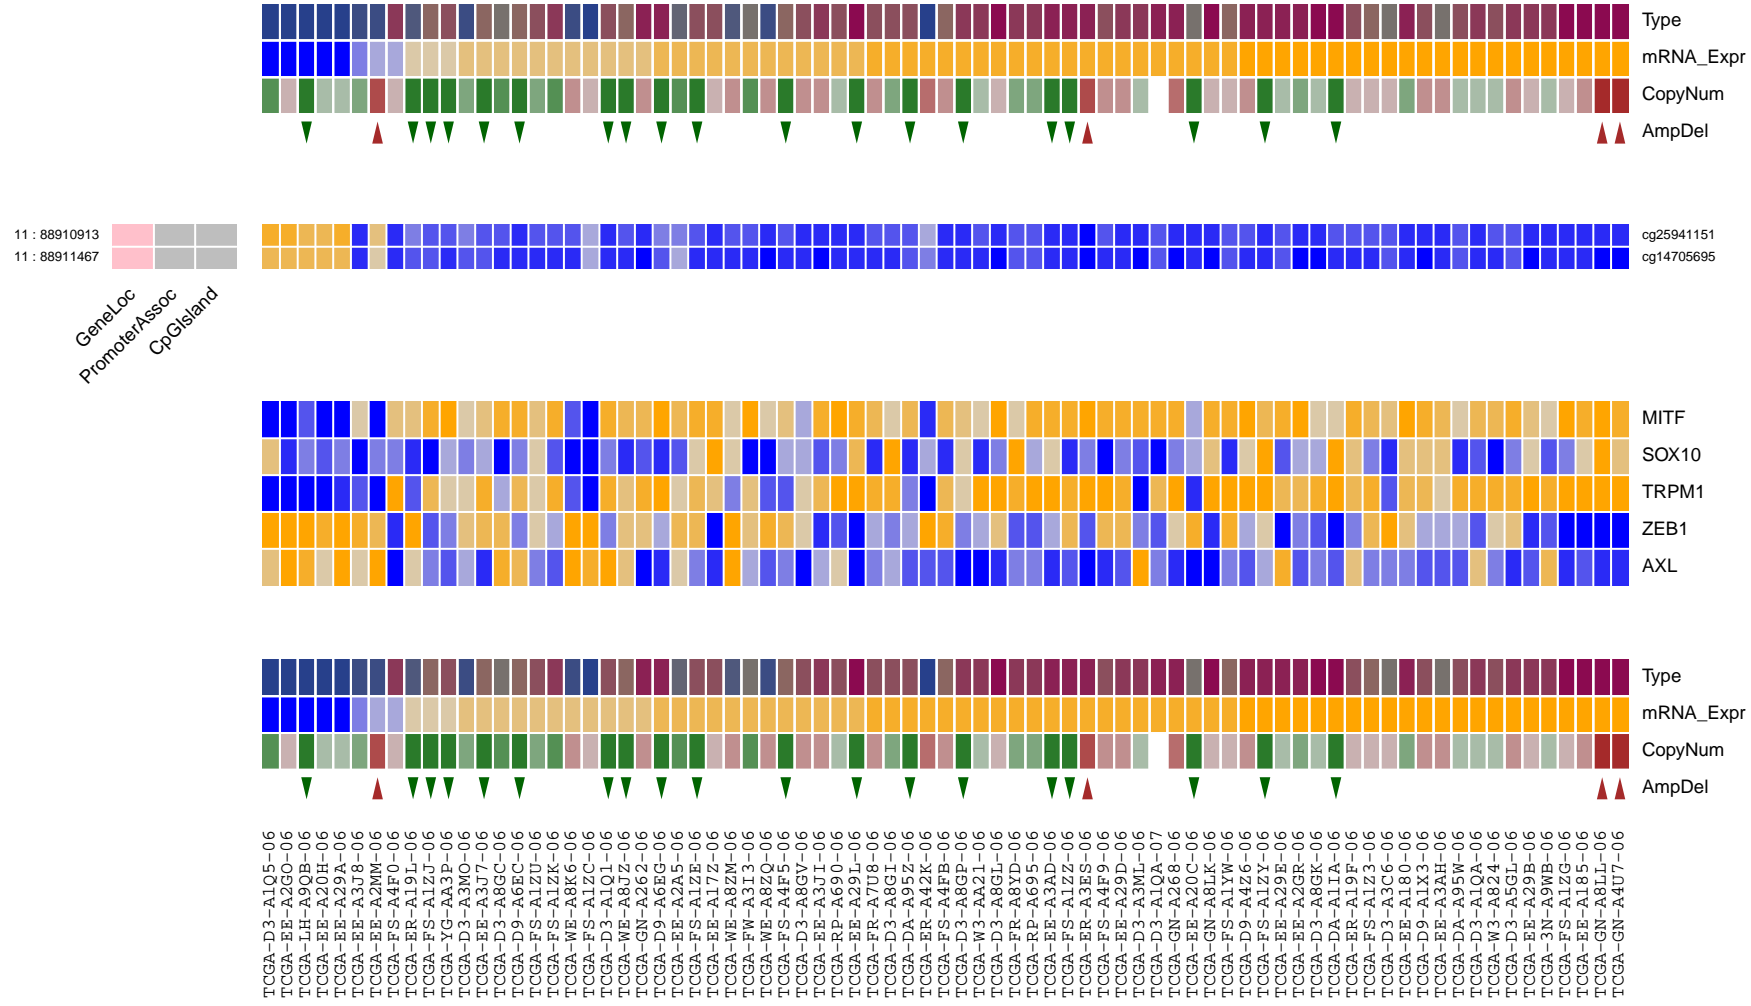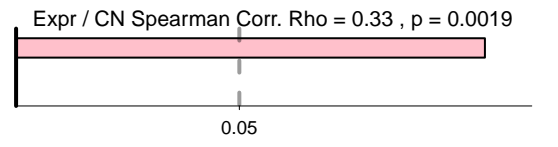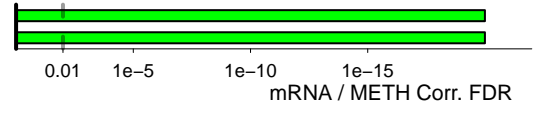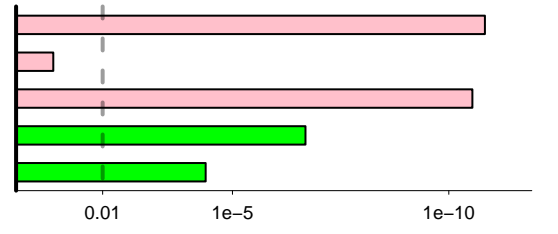

# MLANA

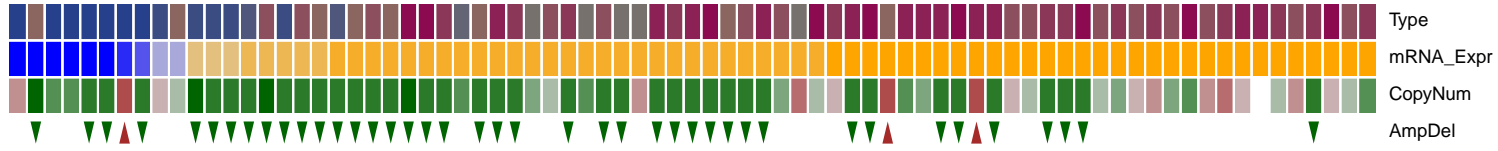

9: 5890866  
9: 5890900  
9: 5891258  
9: 5893907

GeneLoc  
PromoterAssoc  
CpGIsland

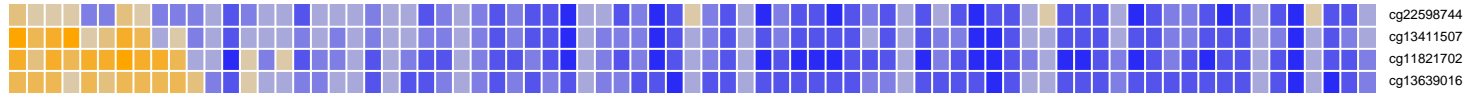

cg22598744  
cg13411507  
cg11821702  
cg13639016

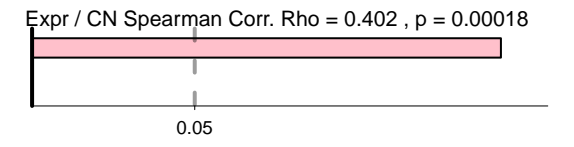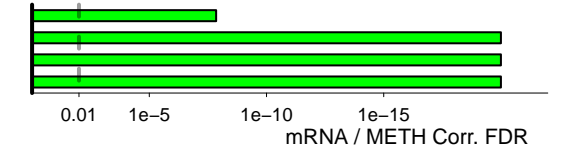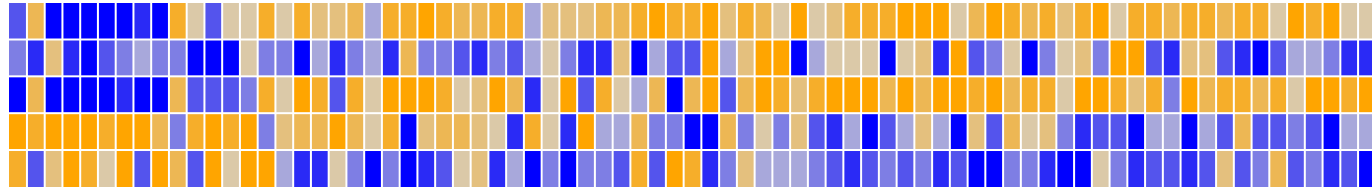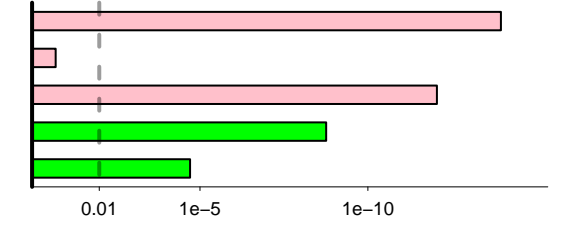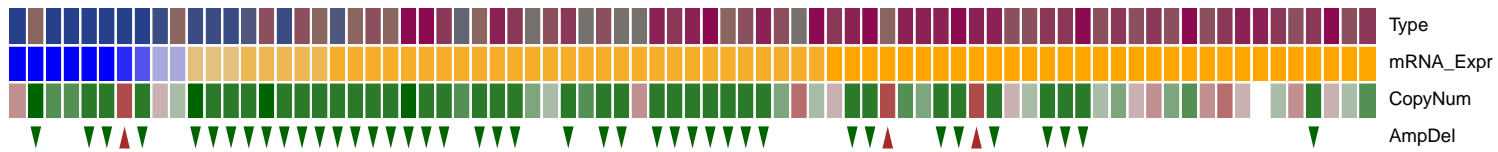

TCGA-LH-A9QB-06  
TCGA-FS-AAFB-06  
TCGA-D3-A1Q5-06  
TCGA-EE-A2G0-06  
TCGA-FS-A1ZC-06  
TCGA-EE-A20H-06  
TCGA-EE-A29A-06  
TCGA-ER-A42K-06  
TCGA-EE-A2MM-06  
TCGA-D9-A6FC-06  
TCGA-WE-A8Z0-06  
TCGA-WE-A8K6-06  
TCGA-EE-A3T8-06  
TCGA-WE-A8ZM-06  
TCGA-D3-A1Q1-06  
TCGA-D3-A3M0-06  
TCGA-FS-A4F9-06  
TCGA-EE-A4T7-06  
TCGA-ER-A19L-06  
TCGA-FS-A1Z3-06  
TCGA-D3-A8GV-06  
TCGA-FS-A11W-06  
TCGA-EE-A29L-06  
TCGA-D3-A8GL-06  
TCGA-EE-A29D-06  
TCGA-EE-A2A5-06  
TCGA-WE-A8JZ-06  
TCGA-GN-A268-06  
TCGA-EE-A3J1-06  
TCGA-EE-A20C-06  
TCGA-FS-A1ZU-06  
TCGA-FS-AAF0-06  
TCGA-D3-A3C6-06  
TCGA-FR-A7U8-06  
TCGA-EE-A3AH-06  
TCGA-D3-A8GC-06  
TCGA-EE-A2GR-06  
TCGA-D3-A3ML-06  
TCGA-EE-A29E-06  
TCGA-GN-A8LL-06  
TCGA-FS-A4F5-06  
TCGA-ER-A19F-06  
TCGA-FS-A1ZY-06  
TCGA-D3-A8GI-06  
TCGA-FW-A3T3-06  
TCGA-D3-A8GK-06  
TCGA-EE-A29B-06  
TCGA-EE-A3AD-06  
TCGA-EE-A185-06  
TCGA-FS-A1Z7-06  
TCGA-D9-A4Z6-06  
TCGA-EE-A180-06  
TCGA-D9-A6HG-06  
TCGA-DA-A11A-06  
TCGA-GN-A282-06  
TCGA-ER-A3ES-06  
TCGA-FS-A1ZE-06  
TCGA-W3-A8Z4-06  
TCGA-D3-A5GL-06  
TCGA-D3-A8GP-06  
TCGA-RP-A690-06  
TCGA-FR-A8YD-06  
TCGA-EE-A17Z-06  
TCGA-FS-A1ZK-06  
TCGA-DA-A95Z-06  
TCGA-GN-AAU7-06  
TCGA-D9-A1X3-06  
TCGA-D3-A1QA-06  
TCGA-FS-A1ZZ-06  
TCGA-D3-A1QA-07  
TCGA-3N-A9WB-06  
TCGA-YG-AA3P-06  
TCGA-RP-A695-06  
TCGA-FS-A1ZG-06  
TCGA-DA-A95W-06  
TCGA-W3-AA21-06

Type  
mRNA\_Expr  
CopyNum  
AmpDel

# CDK2

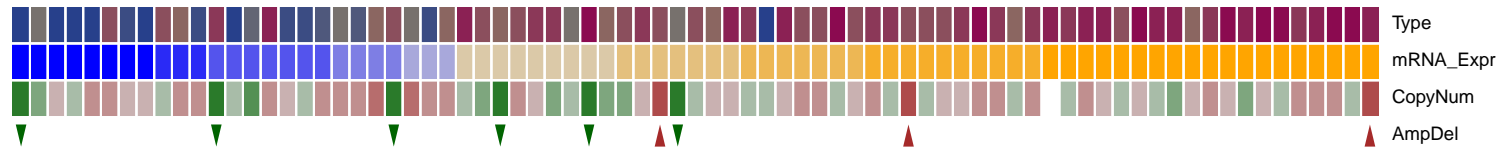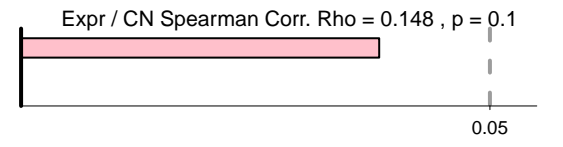

12:56359158  
12:56359210  
12:56359406  
12:56359450  
12:56359916  
12:56360065  
12:56360171  
12:56360229  
12:56360414  
12:56360480  
12:56360607  
12:56360681  
12:56360715  
12:56360787  
12:56360908  
12:56361238  
12:56364837  
12:56365823  
12:56365894

GeneLoc  
PromoterAssoc  
CpGIsland

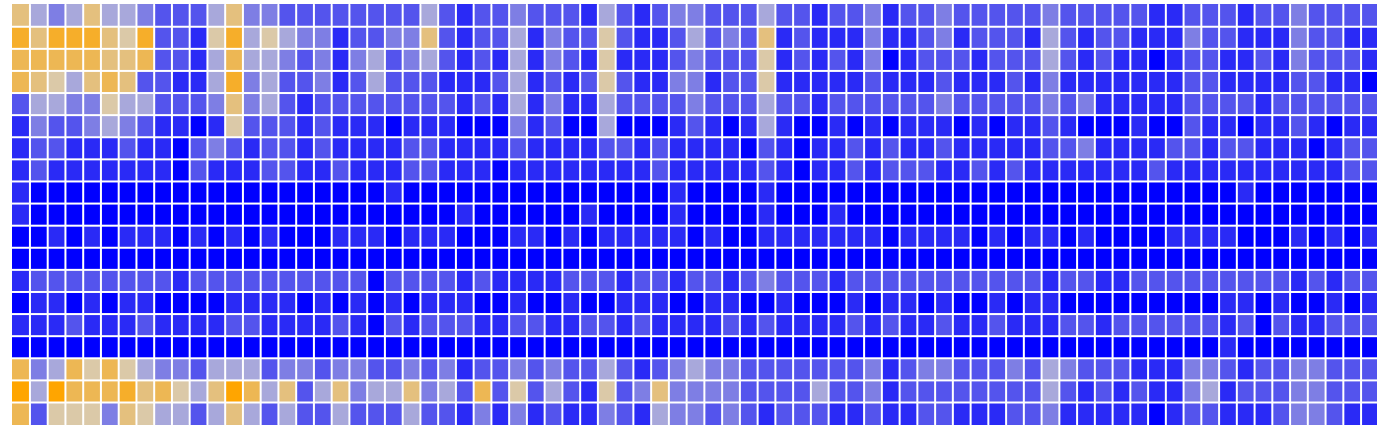

cg00635560  
cg16190688  
cg01574233  
cg12377256  
cg01810863  
cg09106999  
cg16325610  
cg01221216  
cg00129774  
cg08548489  
cg09304040  
cg24914860  
cg10581632  
cg22781397  
cg04108502  
cg03330747  
cg09596975  
cg21074190  
cg02826233

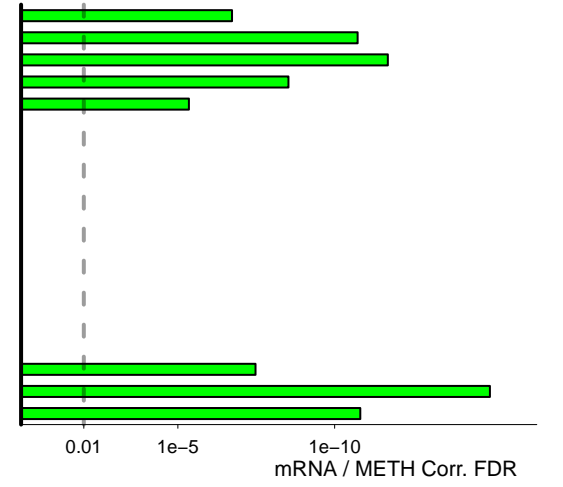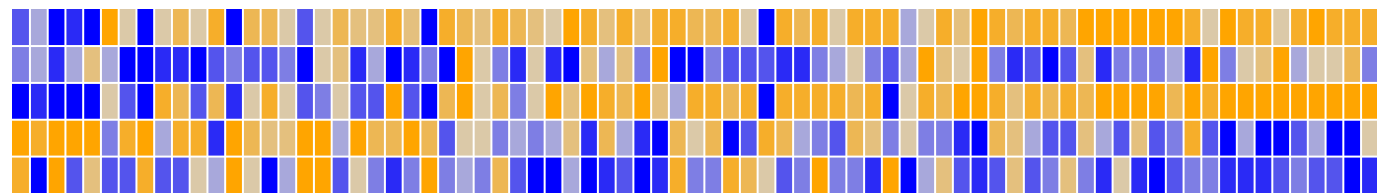

MITF  
SOX10  
TRPM1  
ZEB1  
AXL

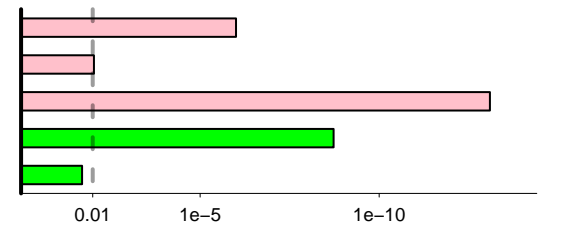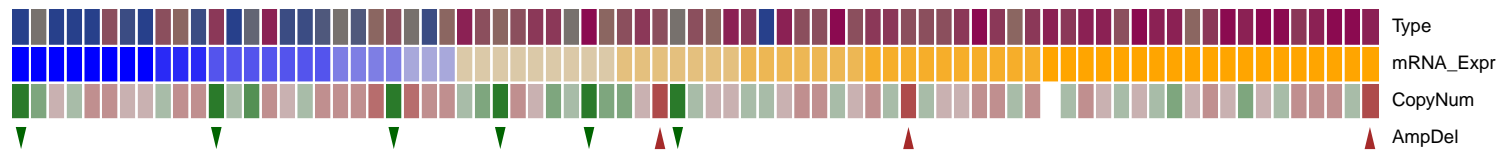

TCGA-LH-A9QB-06  
TCGA-EE-A20C-06  
TCGA-EE-A2GO-06  
TCGA-ER-A42K-06  
TCGA-D3-A1Q5-06  
TCGA-YG-AA3P-06  
TCGA-WE-A8ZC-06  
TCGA-FS-A1ZC-06  
TCGA-DA-A95W-06  
TCGA-FS-A4FB-06  
TCGA-EE-A3J8-06  
TCGA-EE-A3J1-06  
TCGA-EE-A29A-06  
TCGA-EE-A2A5-06  
TCGA-GN-A262-06  
TCGA-D3-A3MG-06  
TCGA-WE-A8KG-06  
TCGA-WE-A8ZM-06  
TCGA-EE-A3AH-06  
TCGA-ER-A19L-06  
TCGA-FS-A4FS-06  
TCGA-FS-A4F9-06  
TCGA-D3-A3C6-06  
TCGA-EE-A2MM-06  
TCGA-FS-A1ZU-06  
TCGA-FS-A1ZY-06  
TCGA-D9-A6EC-06  
TCGA-DA-A95Z-06  
TCGA-D3-A8GF-06  
TCGA-W3-AA21-06  
TCGA-FW-A3I3-06  
TCGA-GN-A8LK-06  
TCGA-EE-A3J7-06  
TCGA-D9-A1X3-06  
TCGA-FS-A4FO-06  
TCGA-EE-A17Z-06  
TCGA-D3-A8GC-06  
TCGA-W3-A824-06  
TCGA-FS-A1Z3-06  
TCGA-EE-A29E-06  
TCGA-3N-A9WB-06  
TCGA-EE-A20H-06  
TCGA-FS-A1ZZ-06  
TCGA-ER-A7U8-06  
TCGA-D3-A1O1-06  
TCGA-D3-A8GK-06  
TCGA-FS-A1ZE-06  
TCGA-D3-A5GI-06  
TCGA-D3-A3ML-06  
TCGA-D3-A8CV-06  
TCGA-D3-A8GI-06  
TCGA-ER-A19F-06  
TCGA-EE-A29B-06  
TCGA-GN-A8LL-06  
TCGA-EE-A29D-06  
TCGA-WE-A8JZ-06  
TCGA-FS-A1ZK-06  
TCGA-D3-A1QA-07  
TCGA-D3-A1QA-06  
TCGA-EE-A180-06  
TCGA-D9-A6EG-06  
TCGA-RP-A690-06  
TCGA-D3-A8GL-06  
TCGA-ER-A3ES-06  
TCGA-EE-A2GR-06  
TCGA-FS-A1YW-06  
TCGA-FR-A8YD-06  
TCGA-FS-A1ZG-06  
TCGA-EE-A3AD-06  
TCGA-GN-A4U7-06  
TCGA-DA-A1IA-06  
TCGA-RP-A695-06  
TCGA-D9-A4Z6-06  
TCGA-EE-A185-06  
TCGA-EE-A29I-06  
TCGA-GN-A268-06

Type  
mRNA\_Expr  
CopyNum  
AmpDel

Gene / Regulator Corr. P

# TTYH2

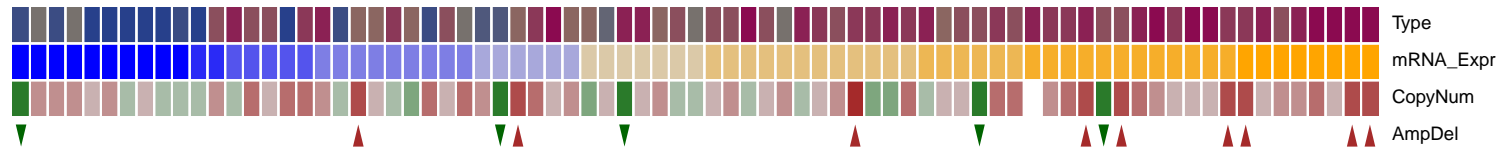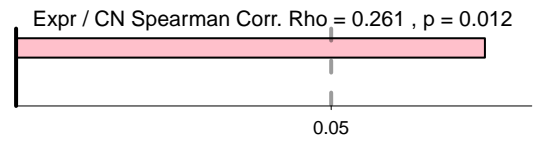

- 17 : 72208322
- 17 : 72208433
- 17 : 72208504
- 17 : 72208788
- 17 : 72209469
- 17 : 72209580
- 17 : 72209602
- 17 : 72209604
- 17 : 72209716
- 17 : 72209721
- 17 : 72209802
- 17 : 72210278
- 17 : 72210343
- 17 : 72210669
- 17 : 72210927
- 17 : 72212478
- 17 : 72231318
- 17 : 72231400
- 17 : 72231448
- 17 : 72237019
- 17 : 72241818
- 17 : 72243979
- 17 : 72244242
- 17 : 72244366
- 17 : 72244451
- 17 : 72244469
- 17 : 72244690
- 17 : 72245470
- 17 : 72245578
- 17 : 72253502
- 17 : 72257002

GeneLoc  
PromoterAssoc  
CpGIsland

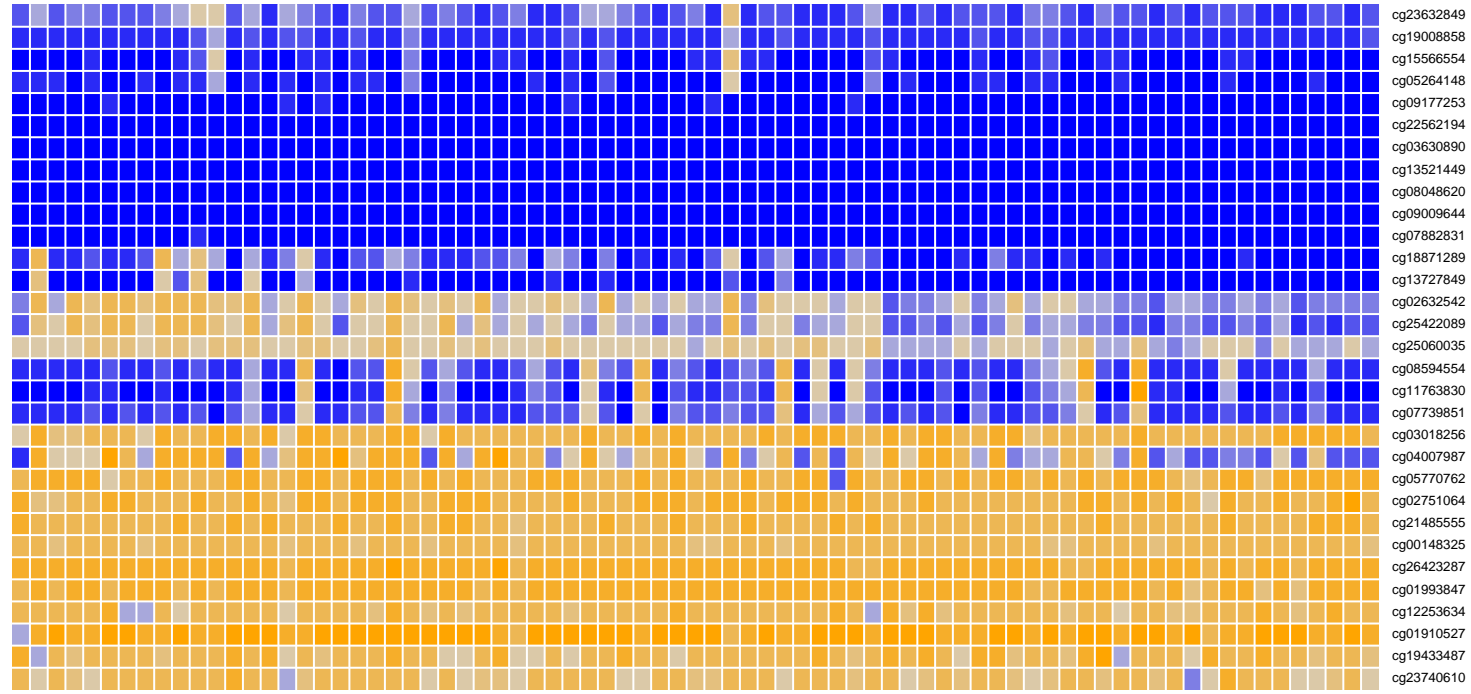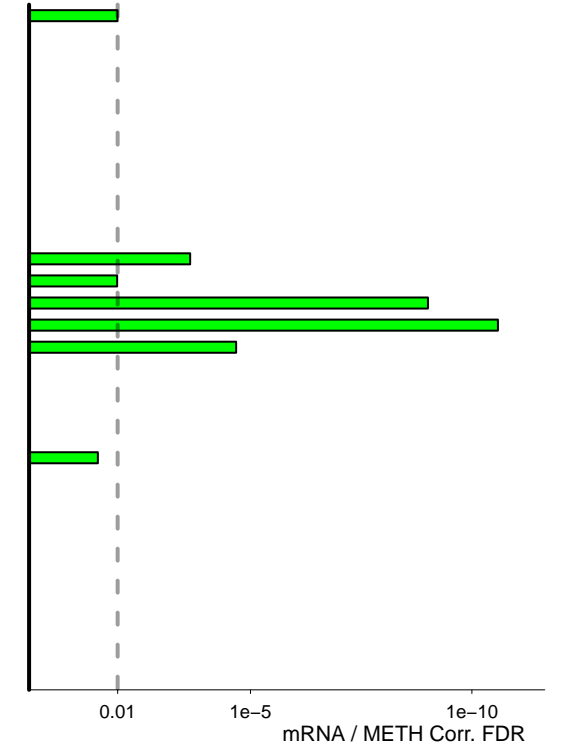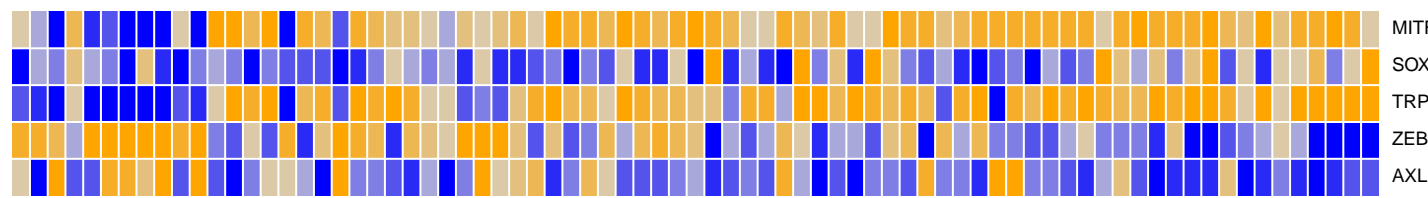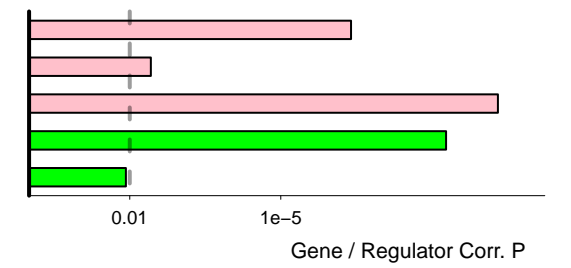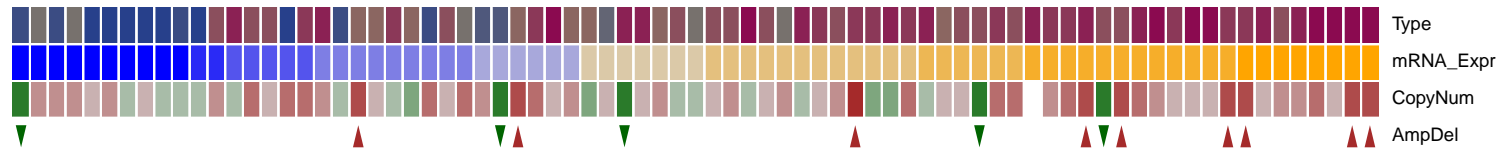

- TCGA-EE-A3J8-06
- TCGA-EE-A20C-06
- TCGA-EE-A2MM-06
- TCGA-EE-A3AH-06
- TCGA-ER-A42K-06
- TCGA-LH-A90B-06
- TCGA-FS-A1ZC-06
- TCGA-D3-A1O5-06
- TCGA-EE-A2GO-06
- TCGA-WE-A8Z0-06
- TCGA-EE-A29A-06
- TCGA-YG-AA3P-06
- TCGA-ER-A3ES-06
- TCGA-W3-A824-06
- TCGA-RP-A690-06
- TCGA-EE-A20H-06
- TCGA-EE-A3TI-06
- TCGA-GN-A262-06
- TCGA-WE-A6K6-06
- TCGA-FS-A1YW-06
- TCGA-FS-A1Z3-06
- TCGA-EE-A29B-06
- TCGA-EE-A3U7-06
- TCGA-D3-A3MO-06
- TCGA-D3-A8GV-06
- TCGA-D3-A3C6-06
- TCGA-WE-A8ZM-06
- TCGA-ER-A19L-06
- TCGA-WE-A8JZ-06
- TCGA-3N-A9WB-06
- TCGA-D3-A8GL-06
- TCGA-FS-A1ZJ-06
- TCGA-D9-A6EC-06
- TCGA-EE-A2A5-06
- TCGA-D9-A4Z6-06
- TCGA-FS-A1ZZ-06
- TCGA-FS-A4FB-06
- TCGA-FS-A1ZE-06
- TCGA-FW-A3I3-06
- TCGA-EE-A17Z-06
- TCGA-DA-A95Z-06
- TCGA-D3-A8GK-06
- TCGA-DA-A95W-06
- TCGA-D3-A8GC-06
- TCGA-FS-A1ZY-06
- TCGA-FS-A4F0-06
- TCGA-D9-A1X3-06
- TCGA-W3-A821-06
- TCGA-RP-A8YD-06
- TCGA-EE-A180-06
- TCGA-EE-A29D-06
- TCGA-EE-A29E-06
- TCGA-FS-A4F5-06
- TCGA-FR-A7U8-06
- TCGA-FS-A4F9-06
- TCGA-FS-A3ML-06
- TCGA-D3-A1O1-06
- TCGA-D3-A1O4-07
- TCGA-RP-A695-06
- TCGA-FS-A1ZK-06
- TCGA-GN-A268-06
- TCGA-D3-A8G1-06
- TCGA-ER-A19F-06
- TCGA-EE-A2GR-06
- TCGA-GN-A8LK-06
- TCGA-D3-A5GL-06
- TCGA-GN-A4U7-06
- TCGA-GN-A8LL-06
- TCGA-D3-A1O4-06
- TCGA-D3-A8GP-06
- TCGA-FS-A1ZU-06
- TCGA-EE-A6EG-06
- TCGA-EE-A3AD-06
- TCGA-EE-A29L-06
- TCGA-FS-A1ZG-06
- TCGA-EE-A185-06
- TCGA-DA-A1IA-06

# SLC24A5

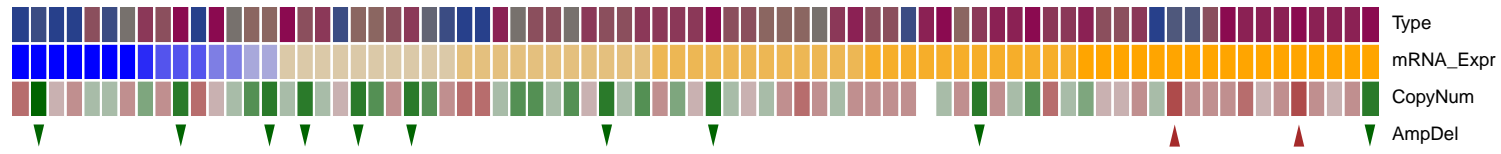

15 : 48411862  
 15 : 48412241  
 15 : 48413040  
 15 : 48413049  
 15 : 48413102  
 15 : 48413218  
 15 : 48413344  
 15 : 48428985  
 15 : 48429064  
 15 : 48429067  
 15 : 48429733

GeneLoc  
 Promoter/Assoc  
 CpGIsland

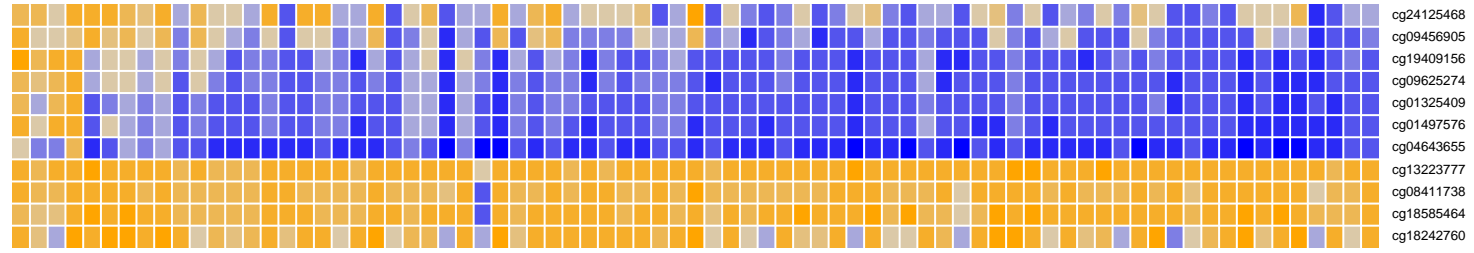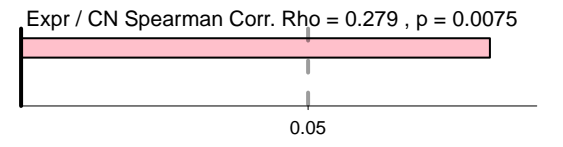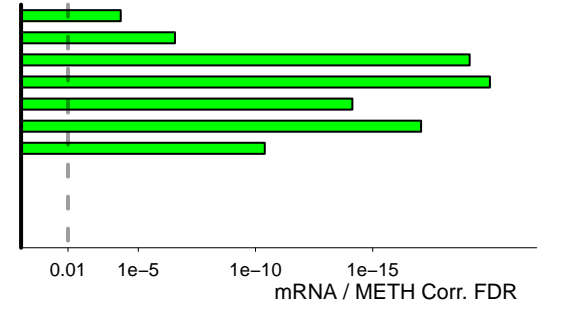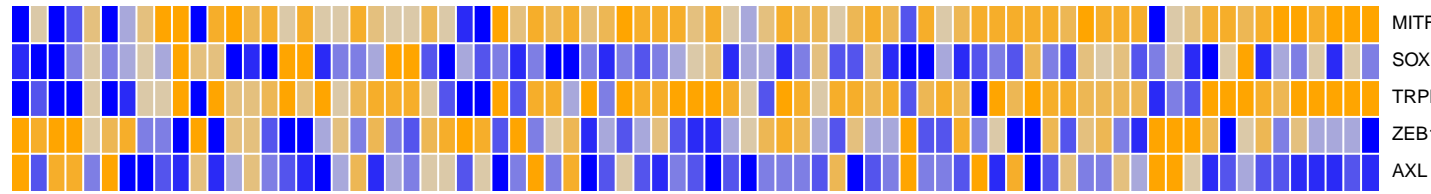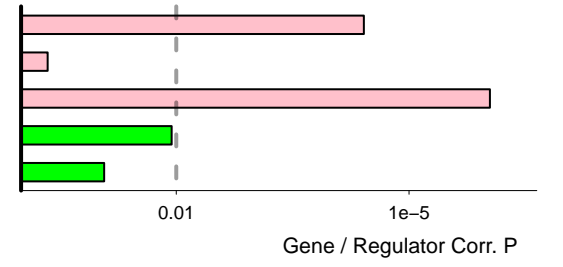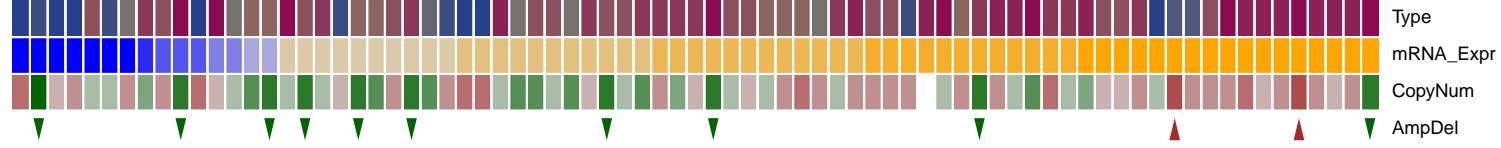

TCGA-EE-A2GO-06  
 TCGA-WE-A8ZQ-06  
 TCGA-FS-A1ZC-06  
 TCGA-LH-A9QB-06  
 TCGA-FS-A1ZU-06  
 TCGA-EE-A2MM-06  
 TCGA-EE-A2OC-06  
 TCGA-D3-A8GP-06  
 TCGA-YG-AA3P-06  
 TCGA-GN-A8LL-06  
 TCGA-D3-A1O5-06  
 TCGA-GN-A4U7-06  
 TCGA-FW-A313-06  
 TCGA-FW-A8TZ-06  
 TCGA-FS-A1ZJ-06  
 TCGA-DA-A1IA-06  
 TCGA-EE-A17Z-06  
 TCGA-WE-A4Z1-06  
 TCGA-W3-A4Z1-06  
 TCGA-D3-A3MO-06  
 TCGA-D9-A6FC-06  
 TCGA-EE-A3J7-06  
 TCGA-D3-A8GI-06  
 TCGA-FR-A8YD-06  
 TCGA-EE-A2A5-06  
 TCGA-EE-A3J8-06  
 TCGA-ER-A42K-06  
 TCGA-EE-A20H-06  
 TCGA-ER-A3ES-06  
 TCGA-D3-A3C6-06  
 TCGA-D3-A1Q1-06  
 TCGA-W3-A824-06  
 TCGA-D3-A8GC-06  
 TCGA-FS-A4F0-06  
 TCGA-DA-A95Z-06  
 TCGA-RP-A690-06  
 TCGA-FS-A1ZK-06  
 TCGA-D3-A5GL-06  
 TCGA-RP-A695-06  
 TCGA-EE-A29B-06  
 TCGA-GN-A8LK-06  
 TCGA-DA-A95W-06  
 TCGA-D3-A8GV-06  
 TCGA-FS-A4F5-06  
 TCGA-FS-A1YW-06  
 TCGA-FS-A1Z3-06  
 TCGA-EE-A3AH-06  
 TCGA-ER-A3WB-06  
 TCGA-3N-A9WB-06  
 TCGA-GN-A2G2-06  
 TCGA-D9-A1X3-06  
 TCGA-ER-A7U8-06  
 TCGA-WE-A8K6-06  
 TCGA-D3-A1QA-07  
 TCGA-FS-A4FB-06  
 TCGA-D3-A6GR-06  
 TCGA-D3-A3ML-06  
 TCGA-GN-A268-06  
 TCGA-EE-A29E-06  
 TCGA-EE-A29L-06  
 TCGA-EE-A29D-06  
 TCGA-D3-A1QA-06  
 TCGA-EE-A180-06  
 TCGA-FS-A1ZE-06  
 TCGA-ER-A19F-06  
 TCGA-EE-A3JI-06  
 TCGA-EE-A29A-06  
 TCGA-WE-A82M-06  
 TCGA-ER-A19L-06  
 TCGA-FS-A4F9-06  
 TCGA-EE-A185-06  
 TCGA-FS-A1ZY-06  
 TCGA-EE-A1ZZ-06  
 TCGA-EE-A2GR-06  
 TCGA-D3-A8GL-06  
 TCGA-EE-A3AD-06  
 TCGA-EE-A6EG-06  
 TCGA-D9-A4Z6-06  
 TCGA-FS-A1ZG-06



# RRAGD

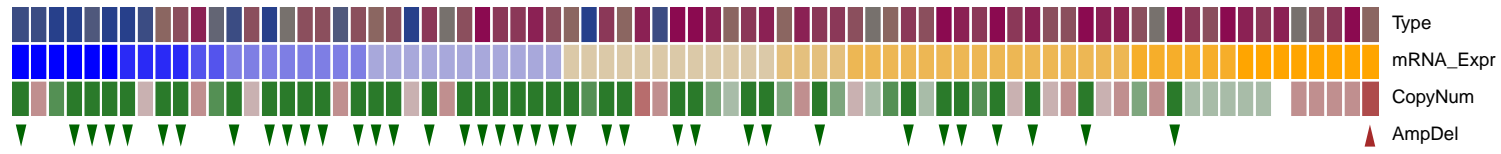

6 : 90122497  
 6 : 90122458  
 6 : 90122369  
 6 : 90122154  
 6 : 90122152  
 6 : 90121836  
 6 : 90121833  
 6 : 90121826  
 6 : 90121670  
 6 : 90121153  
 6 : 90120705  
 6 : 90120254  
 6 : 90120165  
 6 : 90119710  
 6 : 90117722  
 6 : 90117574  
 6 : 90085550

GeneLoc  
 PromoterAssoc  
 CpGIsland

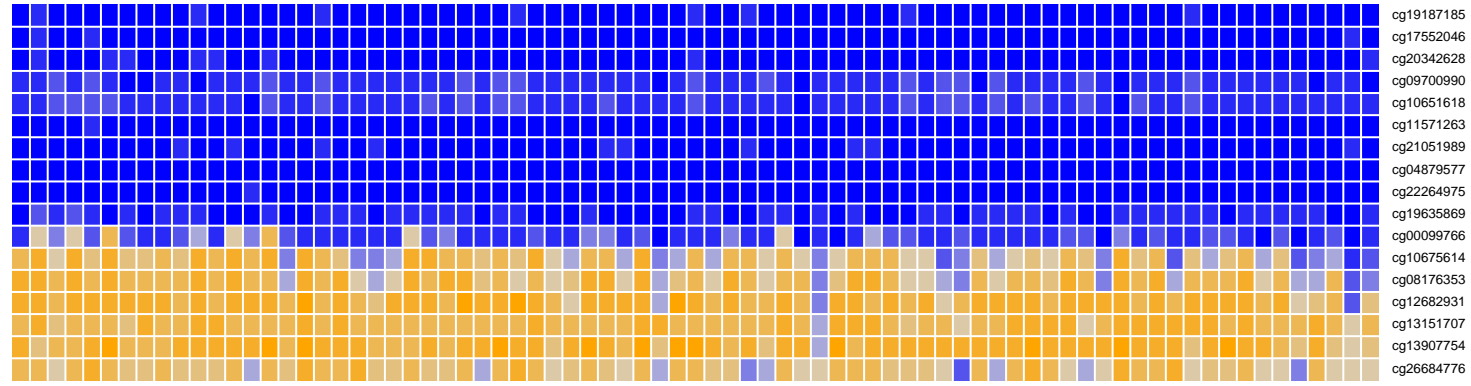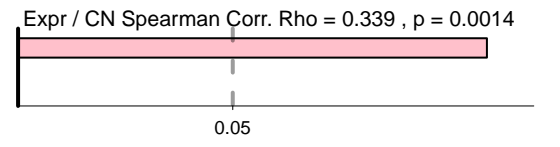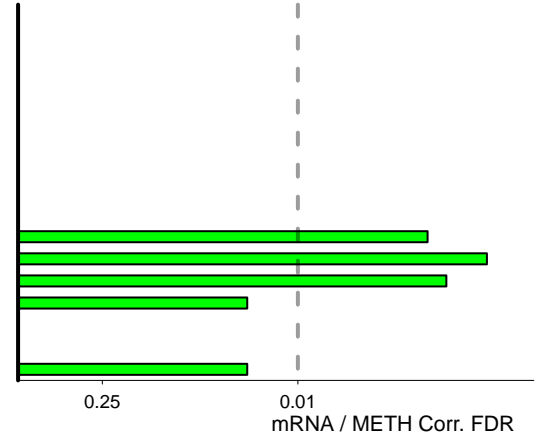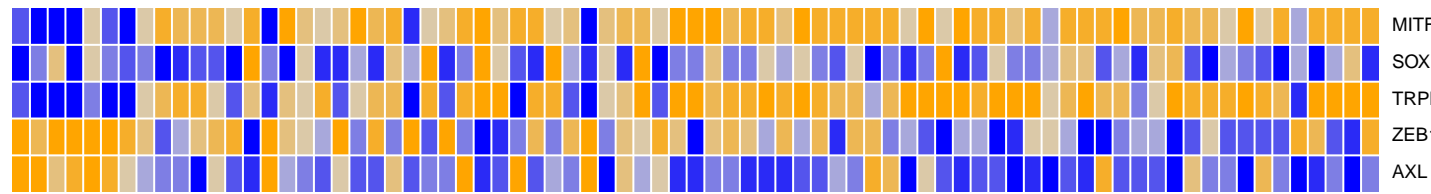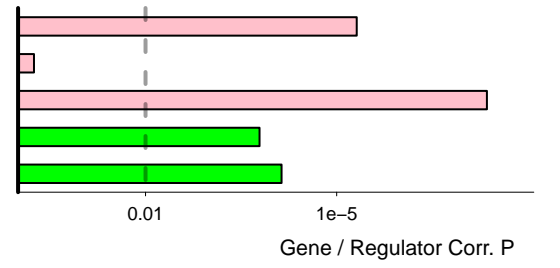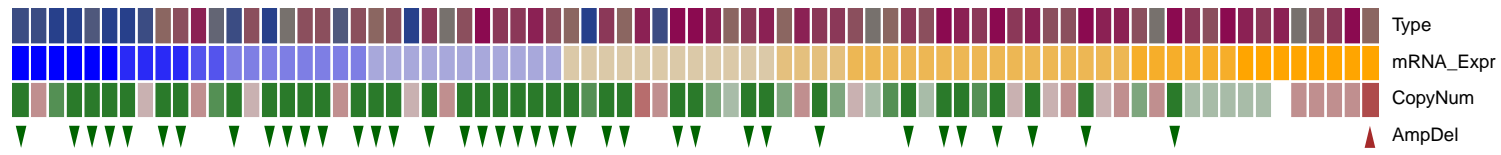

TCGA-WE-A8K6-06  
 TCGA-EE-A2NM-06  
 TCGA-D3-A1Q5-06  
 TCGA-FS-A1ZC-06  
 TCGA-WE-A8ZM-06  
 TCGA-LH-A9OB-06  
 TCGA-EE-A20H-06  
 TCGA-D3-A3MO-06  
 TCGA-FS-A1ZJ-06  
 TCGA-FR-A7U8-06  
 TCGA-GN-A262-06  
 TCGA-EE-A285-06  
 TCGA-WE-A8ZQ-06  
 TCGA-EE-A17Z-06  
 TCGA-EE-A29A-06  
 TCGA-FW-A3I3-06  
 TCGA-FS-A1ZU-06  
 TCGA-DA-A95W-06  
 TCGA-ER-A15L-06  
 TCGA-IG-AA3F-06  
 TCGA-FS-A4FB-06  
 TCGA-ER-A19F-06  
 TCGA-ER-A42K-06  
 TCGA-FR-A8YD-06  
 TCGA-D3-A3C6-06  
 TCGA-D3-A1Q1-06  
 TCGA-GN-A8LL-06  
 TCGA-EE-A29B-06  
 TCGA-D3-A3ML-06  
 TCGA-FS-A1ZZ-06  
 TCGA-D3-A8GI-06  
 TCGA-FS-A4F5-06  
 TCGA-EE-A2GO-06  
 TCGA-D3-A8GF-06  
 TCGA-WE-A8JZ-06  
 TCGA-FS-A1ZY-06  
 TCGA-EE-A3J8-06  
 TCGA-D3-A8GL-06  
 TCGA-FS-A1ZG-06  
 TCGA-EE-A180-06  
 TCGA-FS-A1Z3-06  
 TCGA-D3-A5GL-06  
 TCGA-EE-A3AD-06  
 TCGA-EE-A3J7-06  
 TCGA-D9-A4Z6-06  
 TCGA-EE-A29D-06  
 TCGA-EE-A3J1-06  
 TCGA-FS-A1ZE-06  
 TCGA-D3-A8GC-06  
 TCGA-D9-A69C-06  
 TCGA-W3-A2J1-06  
 TCGA-RP-A69J-06  
 TCGA-DA-A1IA-06  
 TCGA-D9-A6EG-06  
 TCGA-FS-A1ZK-06  
 TCGA-EE-A185-06  
 TCGA-FS-A4F0-06  
 TCGA-GN-A268-06  
 TCGA-D3-A8GV-06  
 TCGA-D9-A1X3-06  
 TCGA-GN-A4U7-06  
 TCGA-EE-A29E-06  
 TCGA-EE-A2GR-06  
 TCGA-DA-A95Z-06  
 TCGA-EE-A3AH-06  
 TCGA-EE-A29L-06  
 TCGA-D3-A1QA-06  
 TCGA-W3-A824-06  
 TCGA-D3-A8GK-06  
 TCGA-ER-A3ES-06  
 TCGA-3N-A9WB-06  
 TCGA-D3-A1QA-07  
 TCGA-EE-A20C-06  
 TCGA-FS-A4F9-06  
 TCGA-RP-A695-06  
 TCGA-GN-A8LK-06  
 TCGA-FS-A1YW-06

# TRIM63

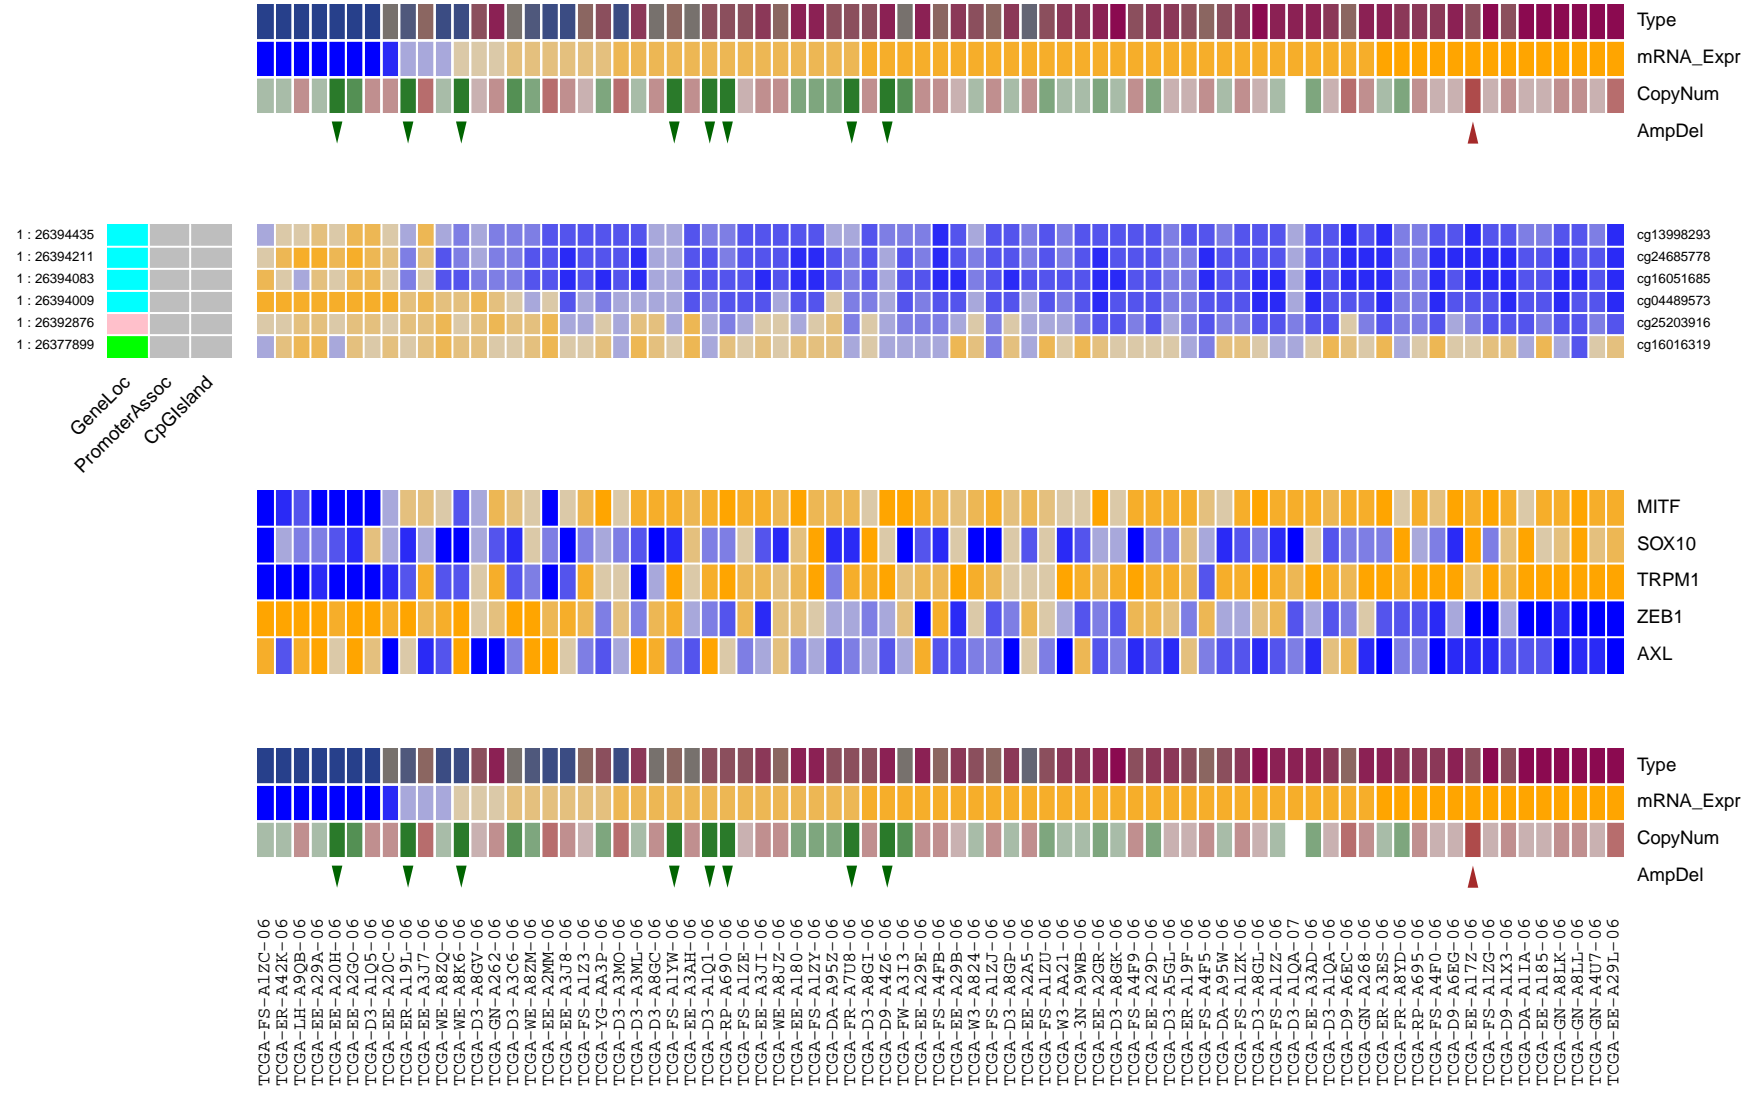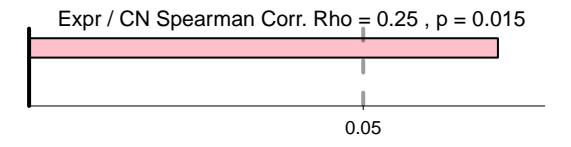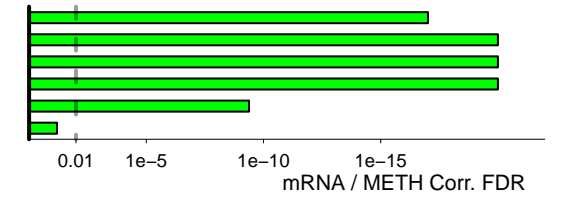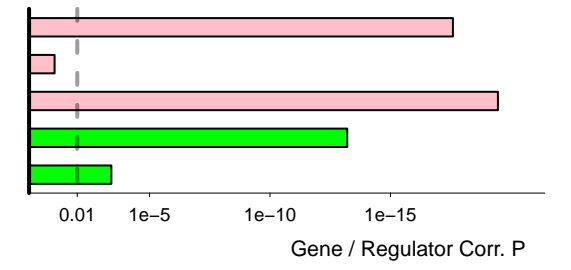

# GPM6B

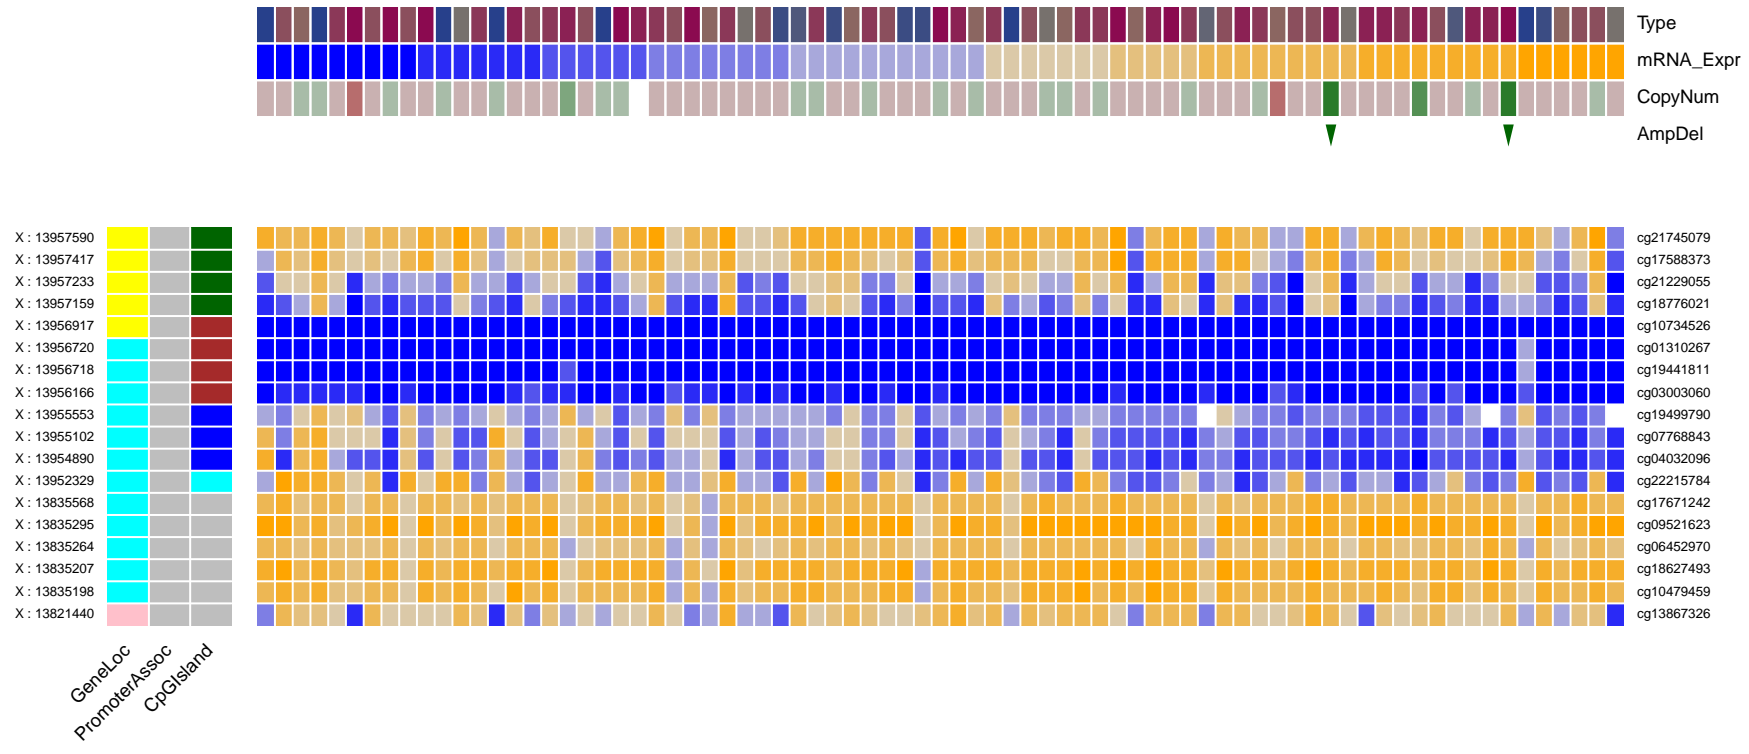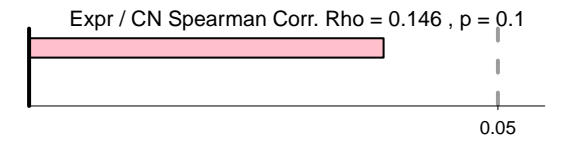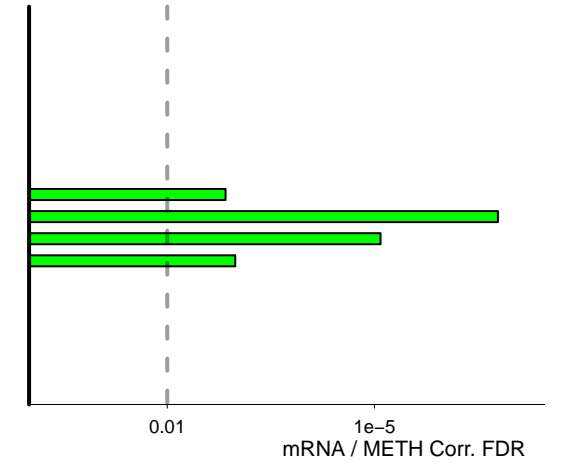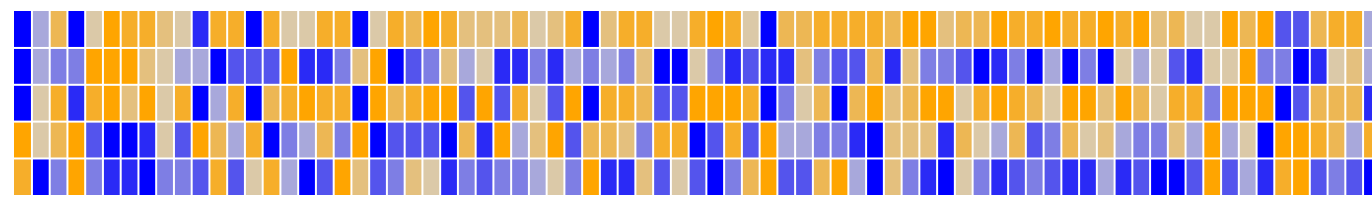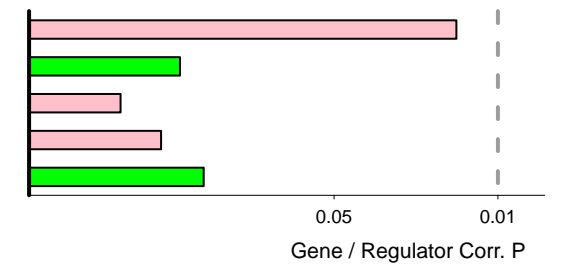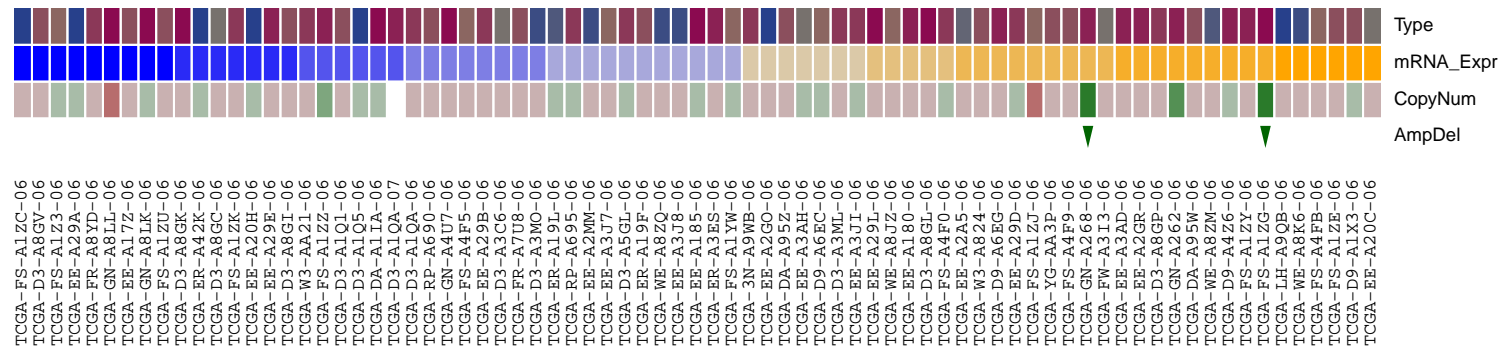

# SOX10

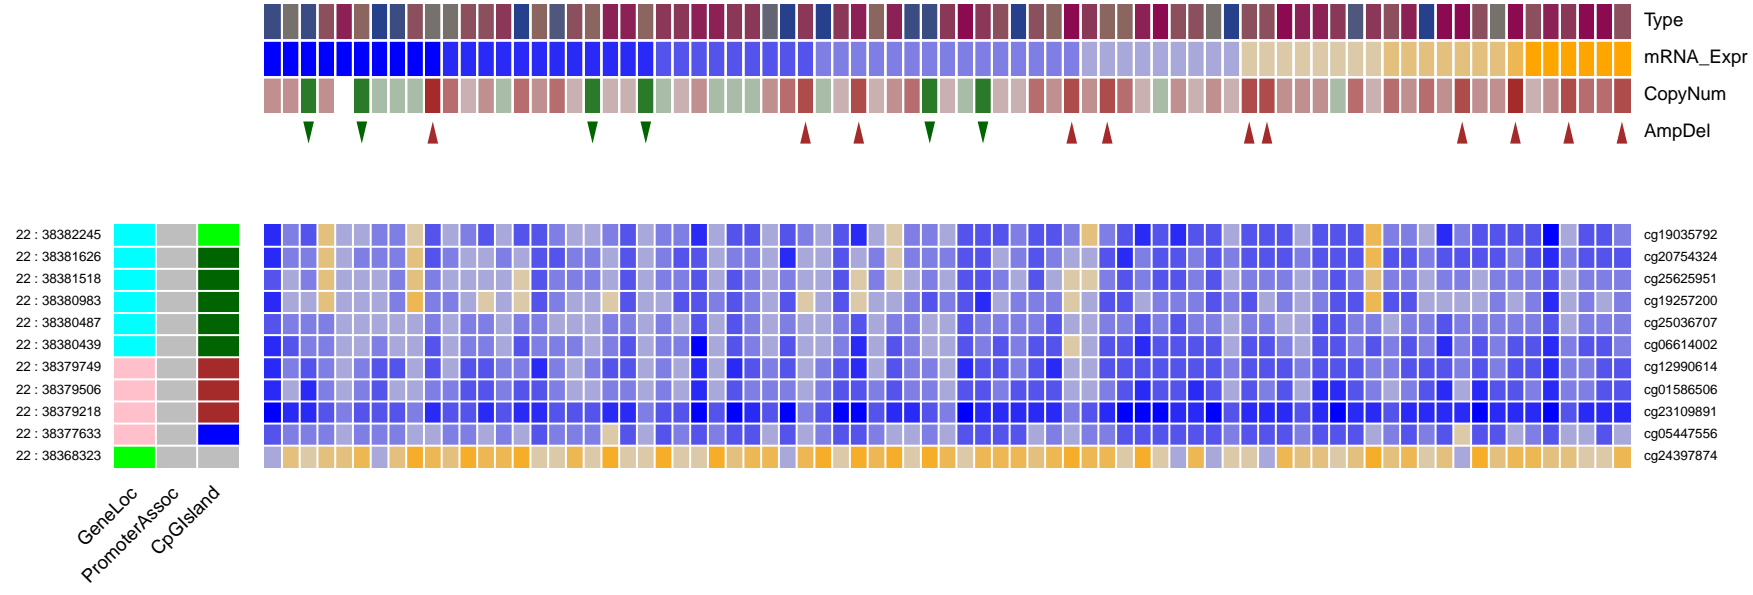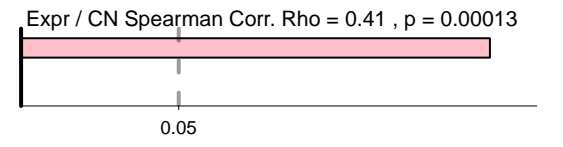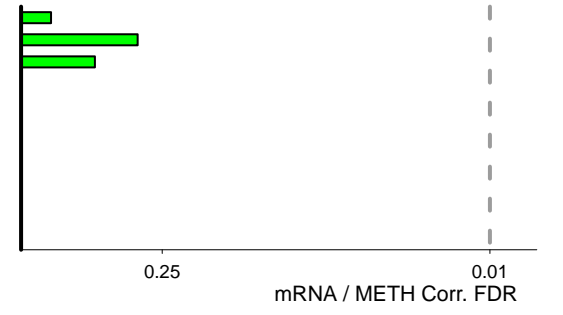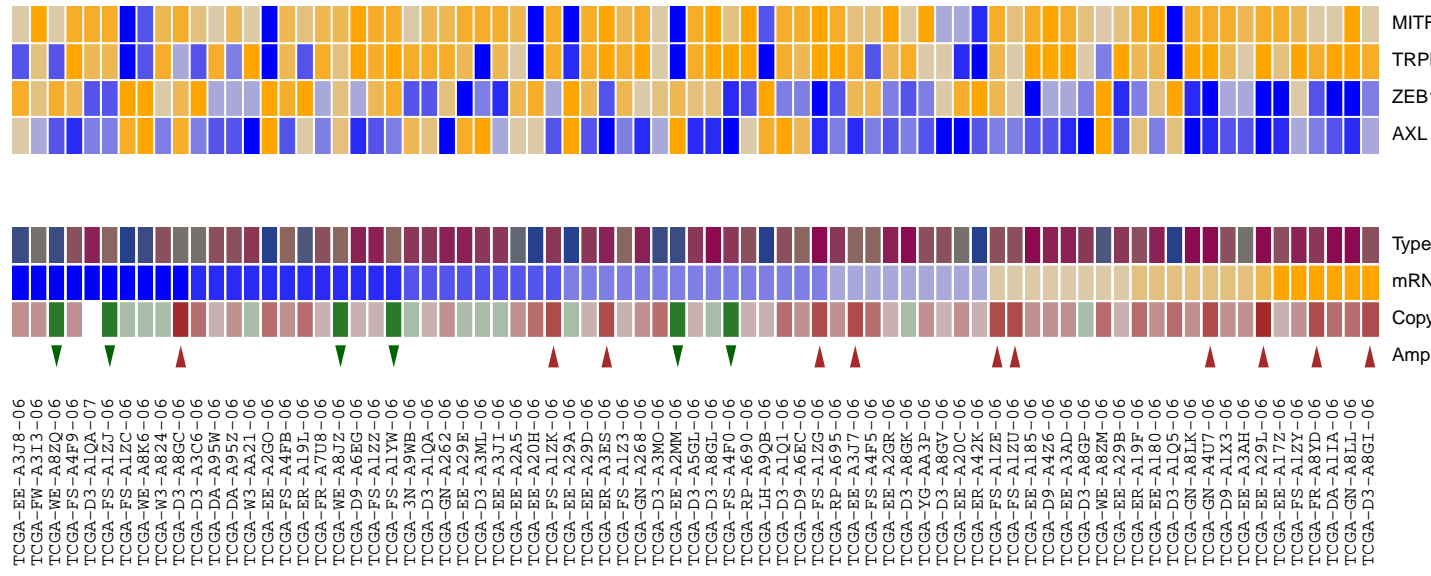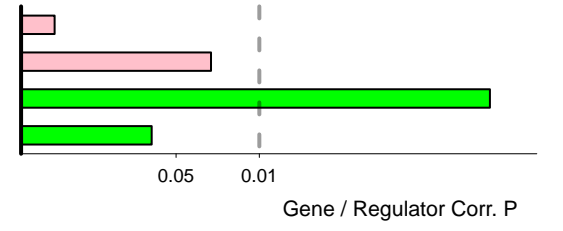

# FAM69B

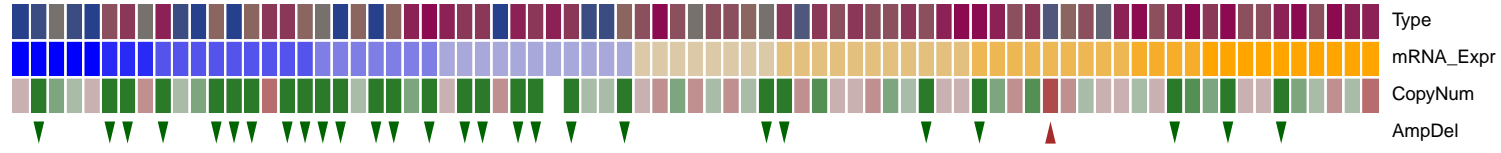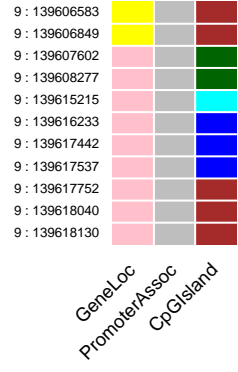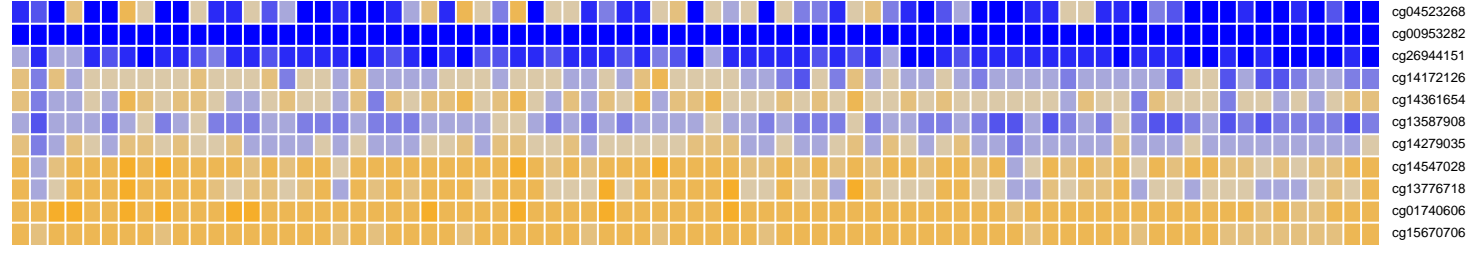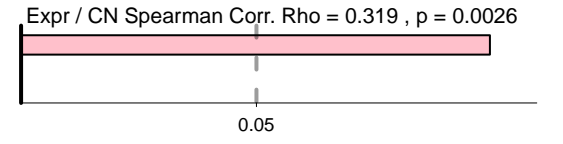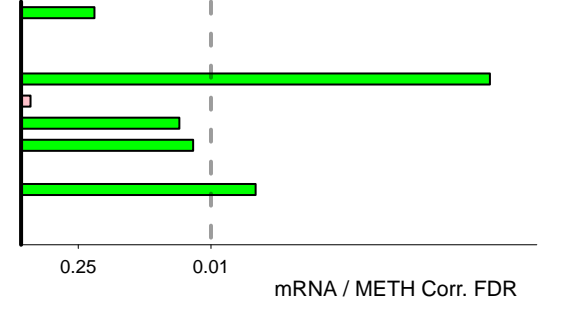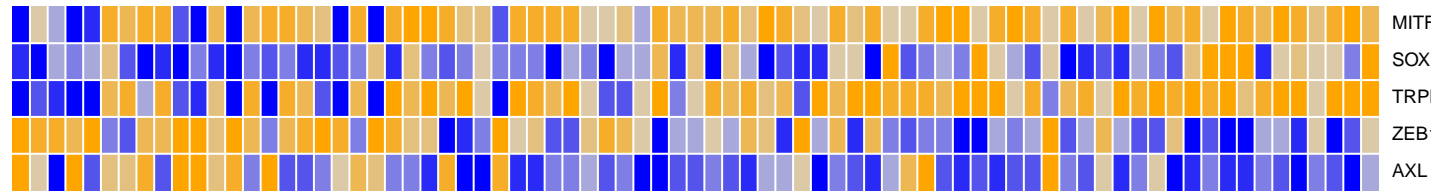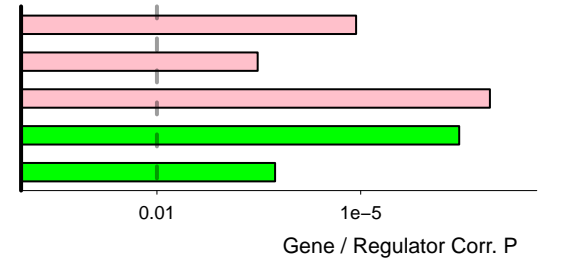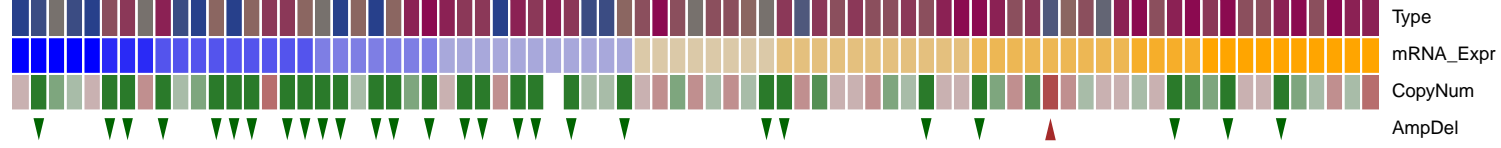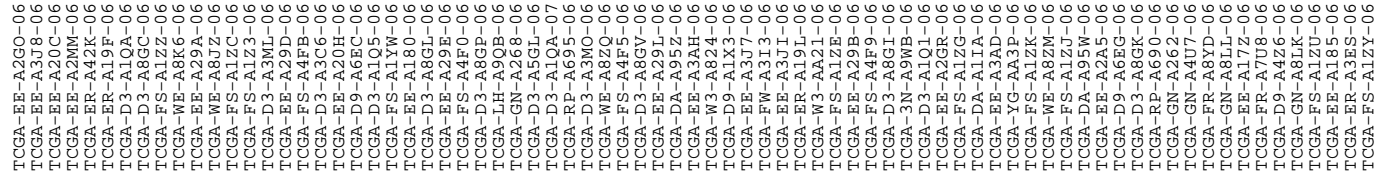

# TBC1D16

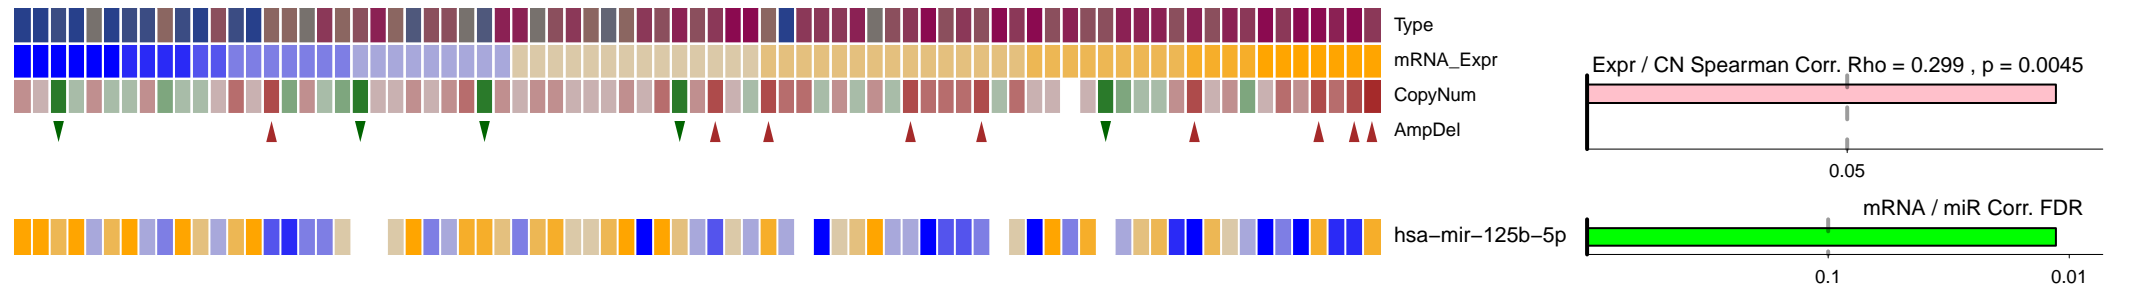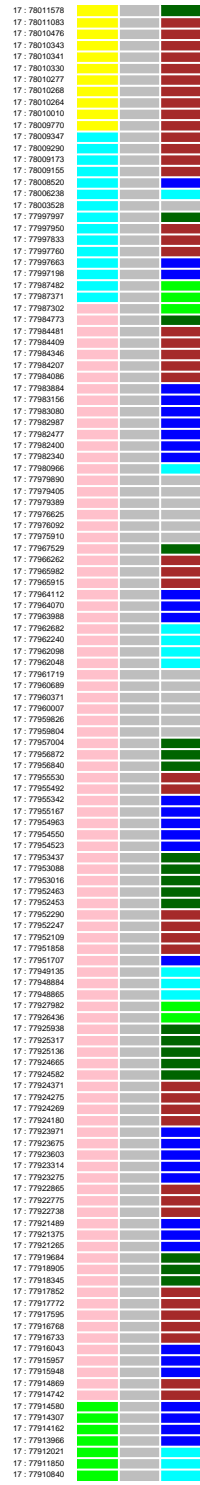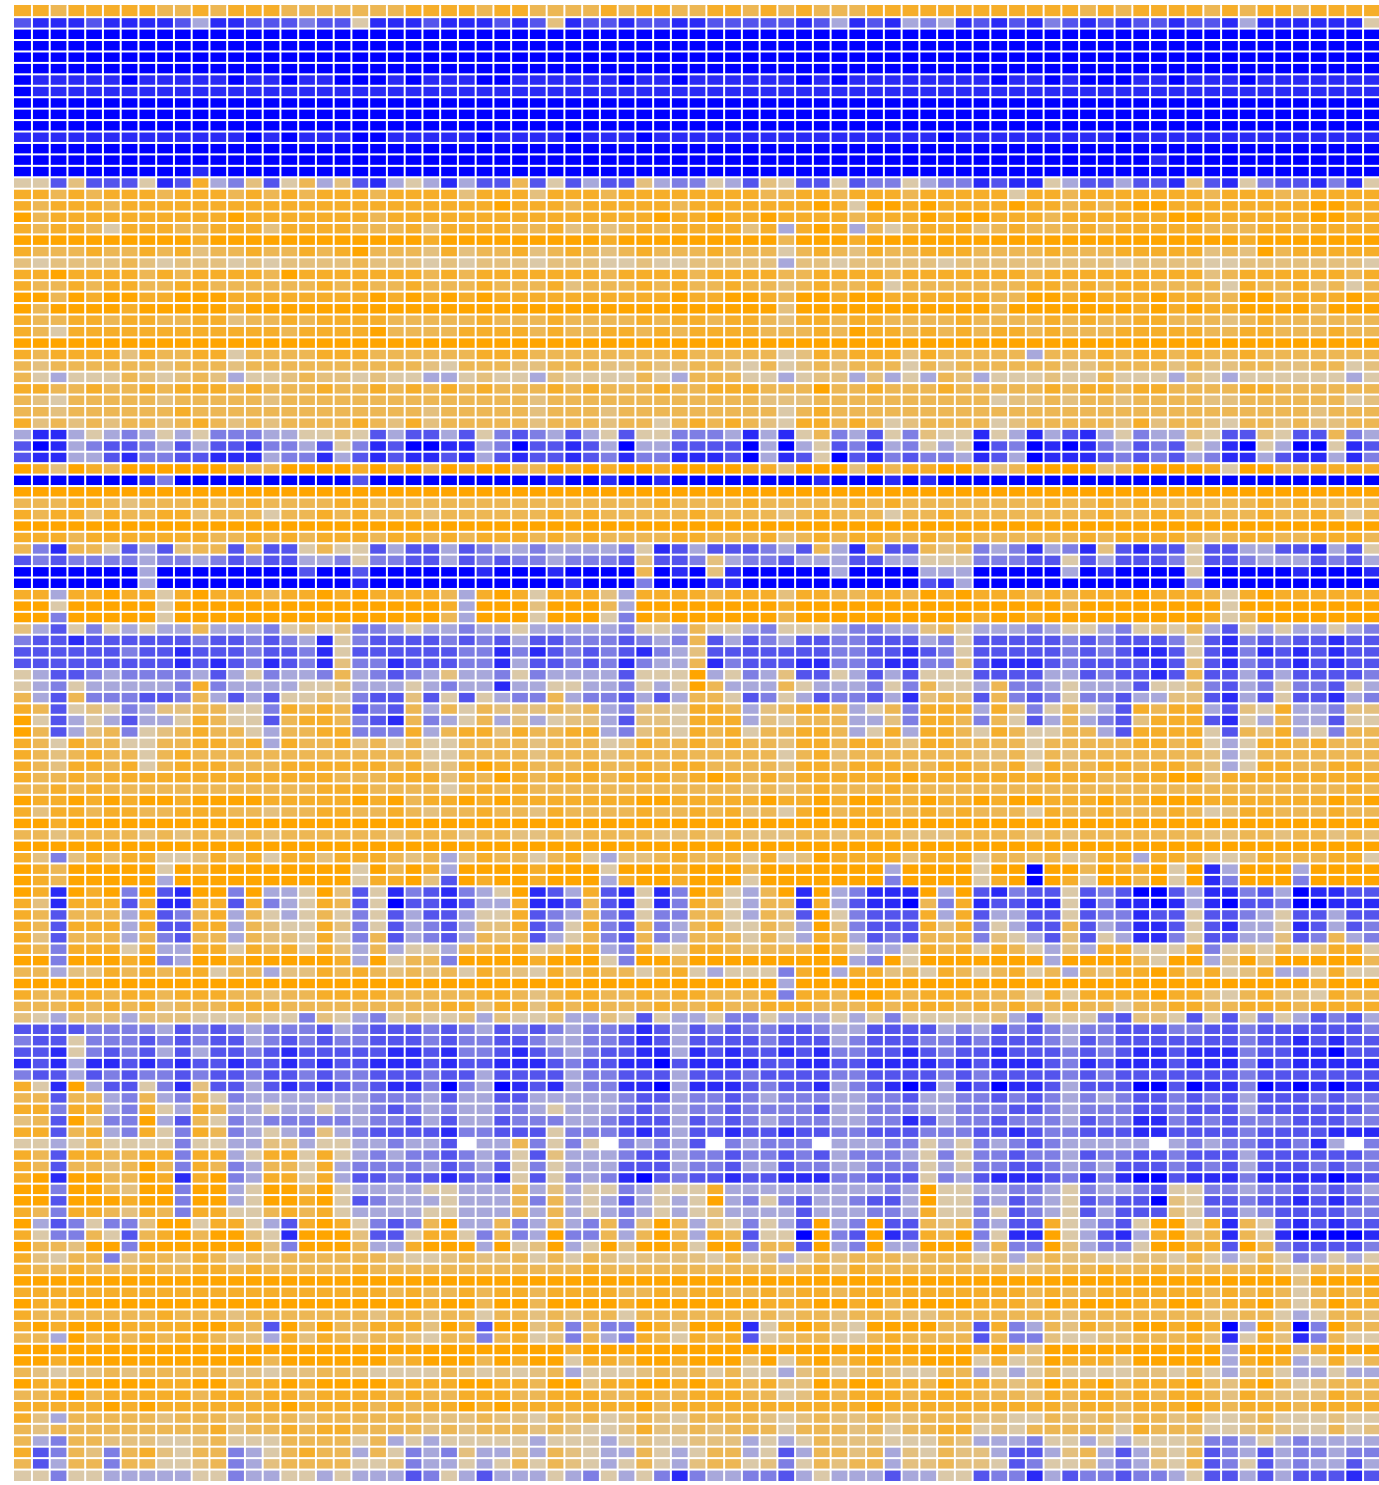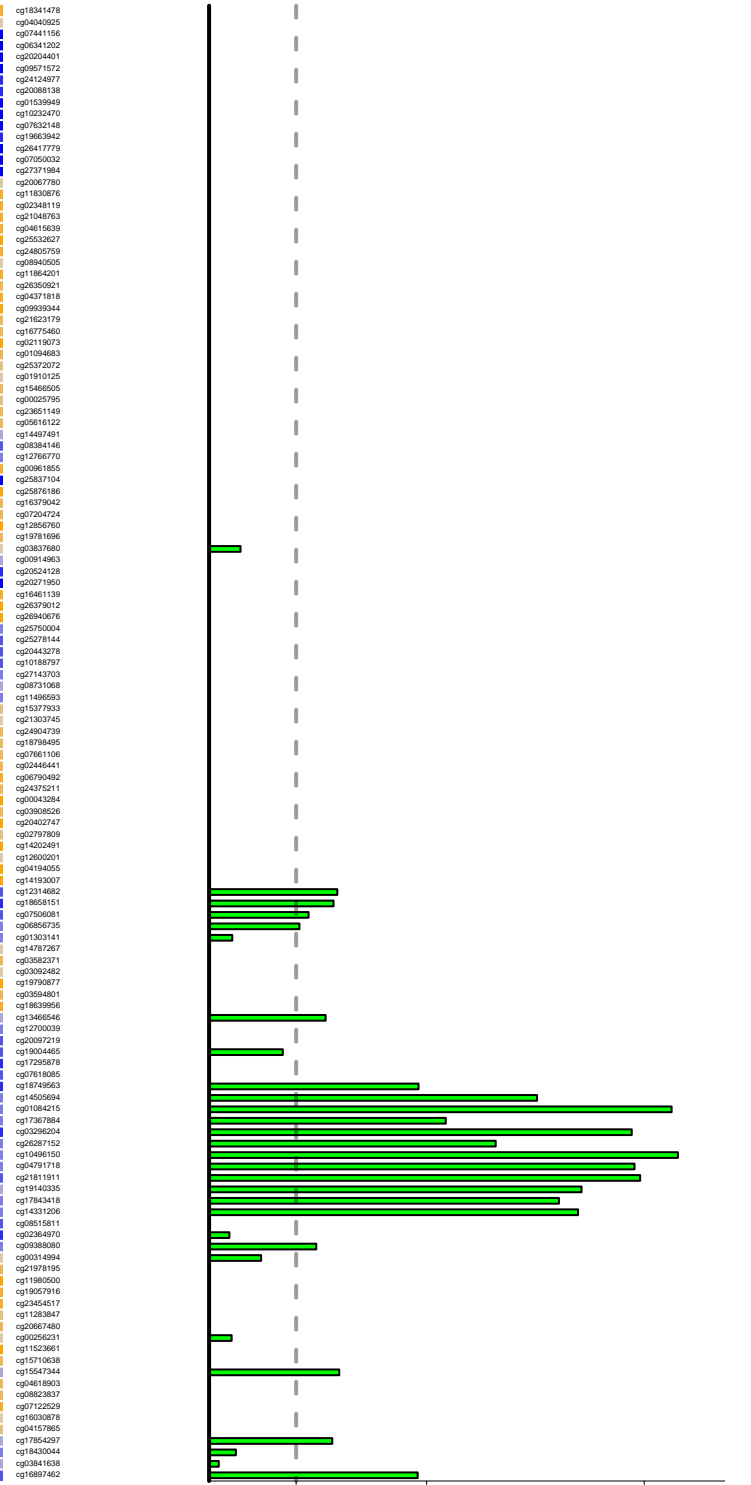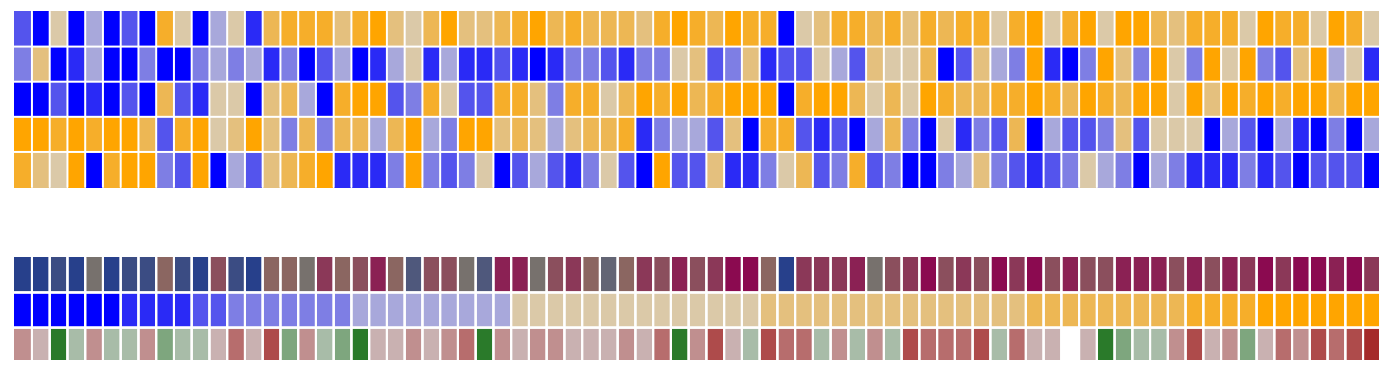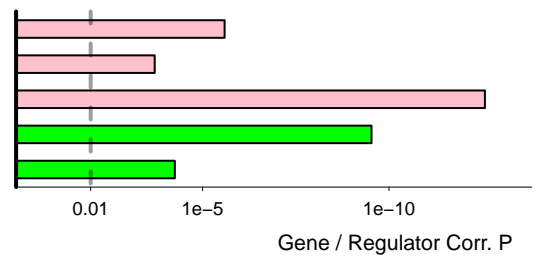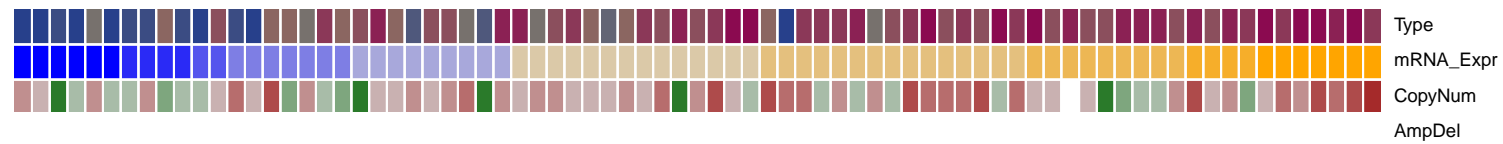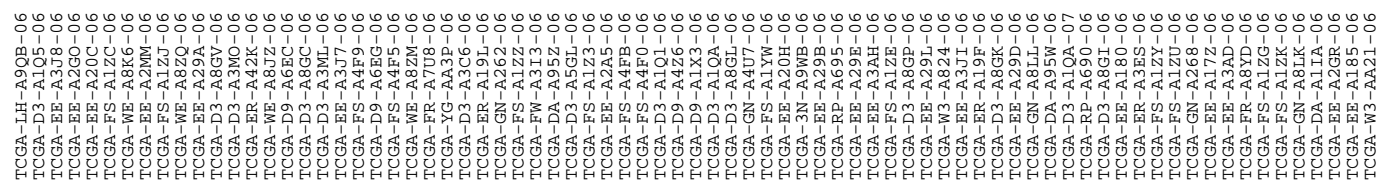

# RENBP

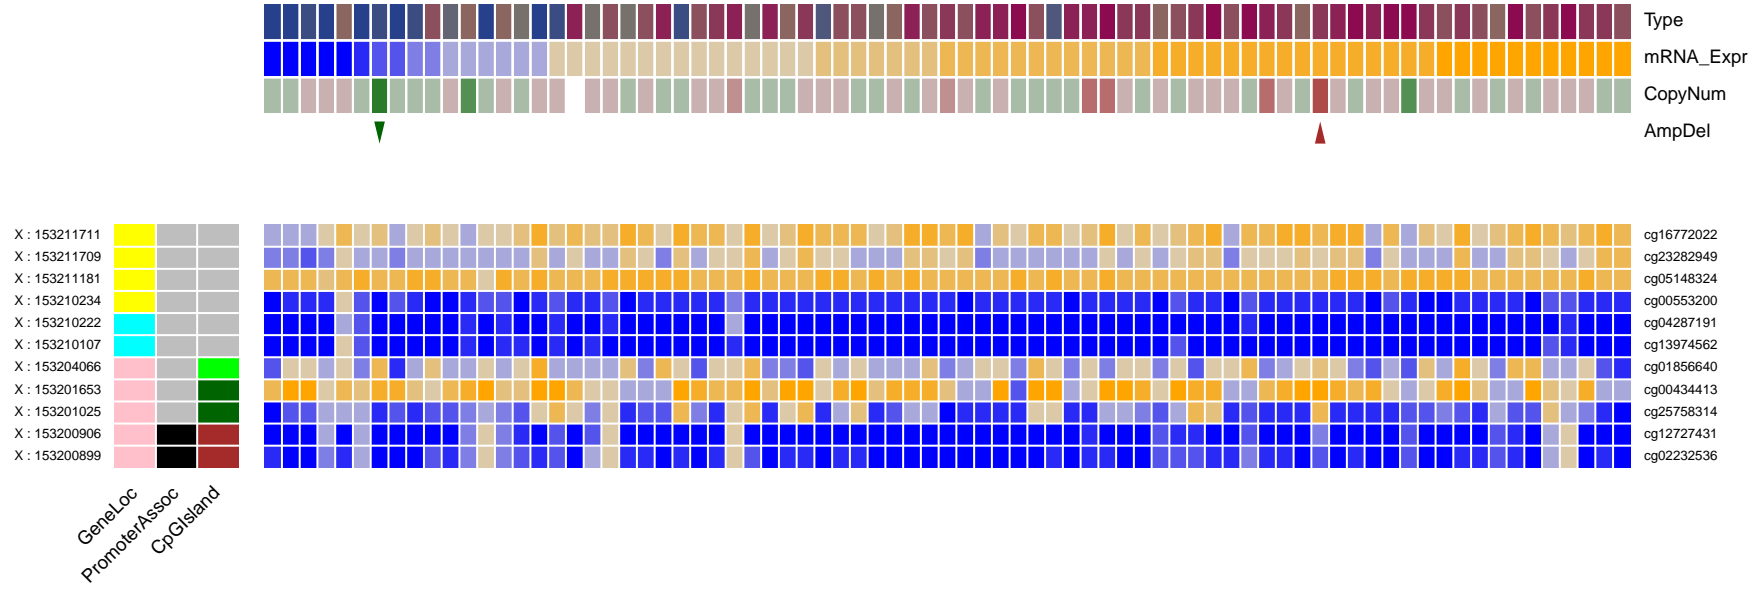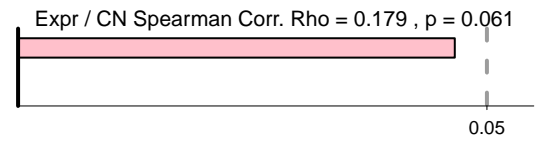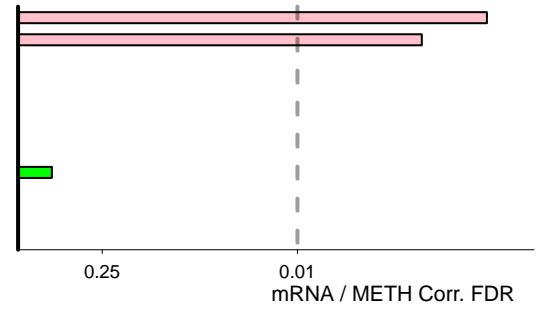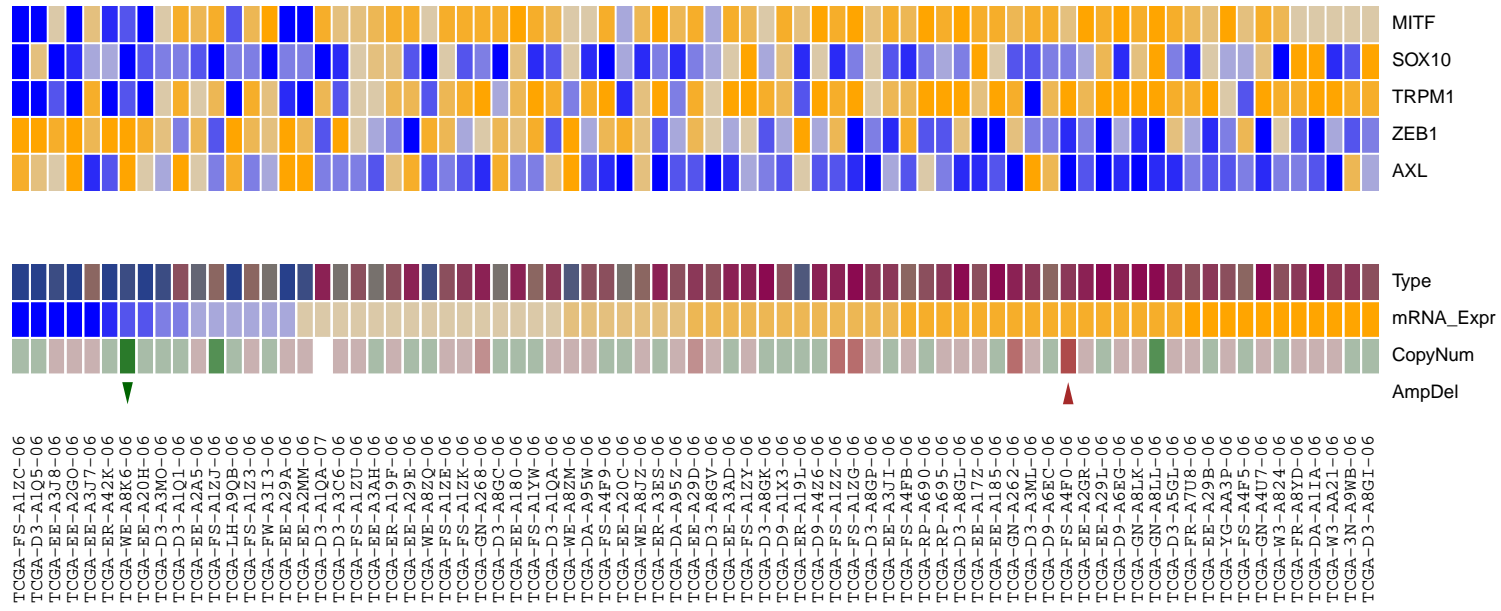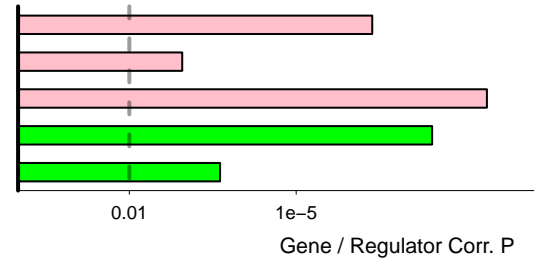

# NR4A1

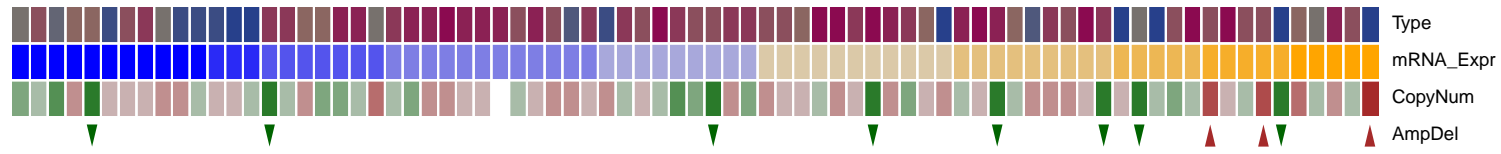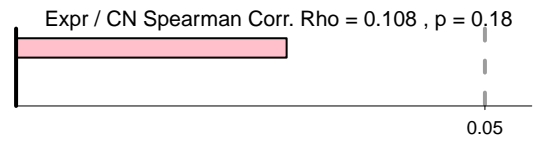

12 : 52414843  
 12 : 52416858  
 12 : 52417019  
 12 : 52417353  
 12 : 52417619  
 12 : 52419802  
 12 : 52423671  
 12 : 52426669  
 12 : 52426797  
 12 : 52426922  
 12 : 52427143  
 12 : 52427204  
 12 : 52430400  
 12 : 52430520  
 12 : 52430851  
 12 : 52431177  
 12 : 52431306  
 12 : 52431312  
 12 : 52431320  
 12 : 52431508  
 12 : 52435420  
 12 : 52436085  
 12 : 52436478  
 12 : 52437451  
 12 : 52437571  
 12 : 52441660  
 12 : 52444020  
 12 : 52444554  
 12 : 52444825  
 12 : 52444993  
 12 : 52445075  
 12 : 52445276  
 12 : 52445820  
 12 : 52448244  
 12 : 52448908  
 12 : 52450213  
 12 : 52451268  
 12 : 52452745

GeneLoc  
 PromoterAssoc  
 CpGIsland

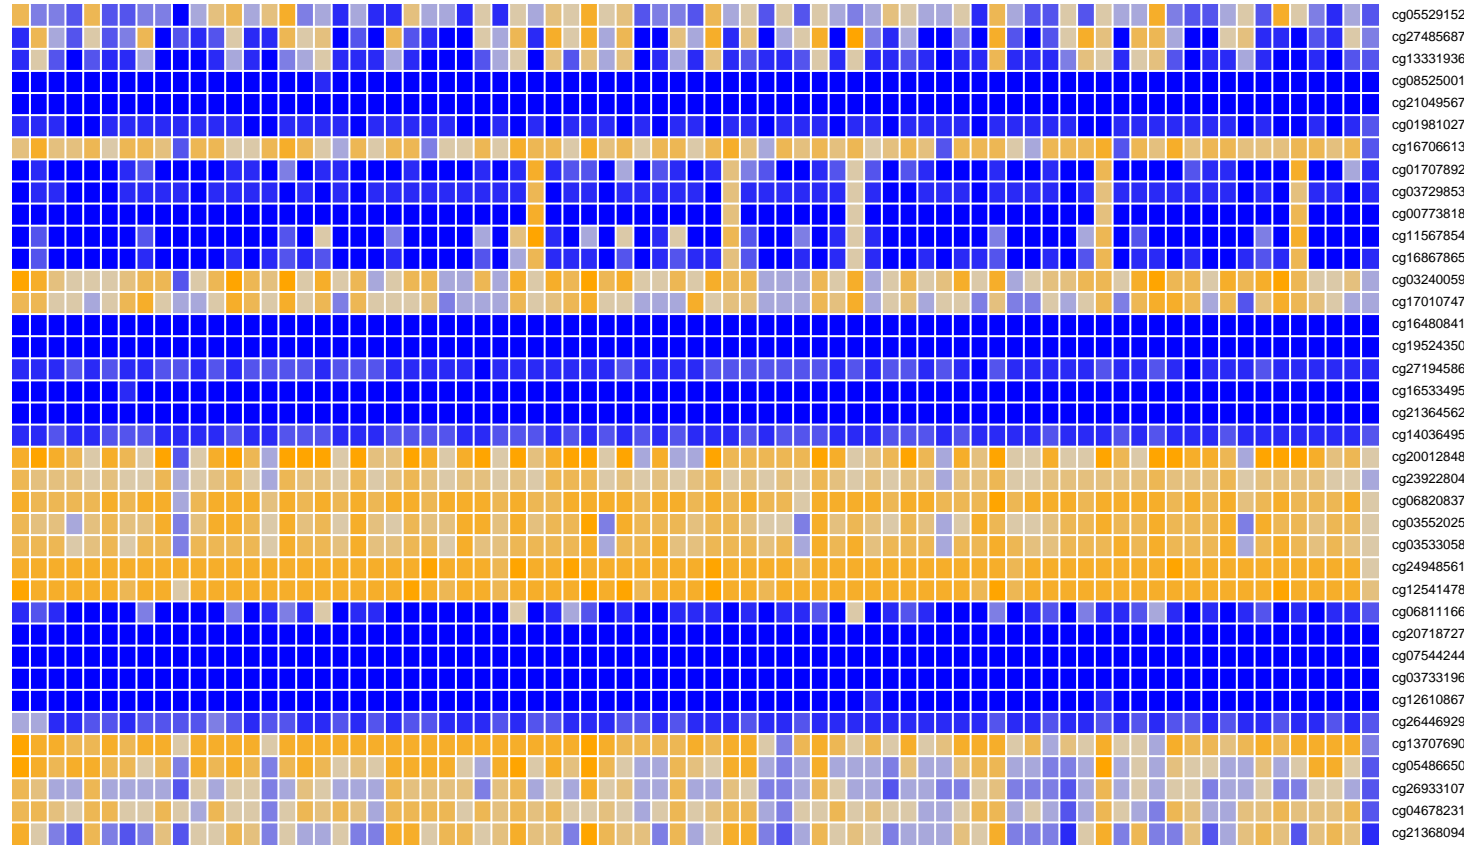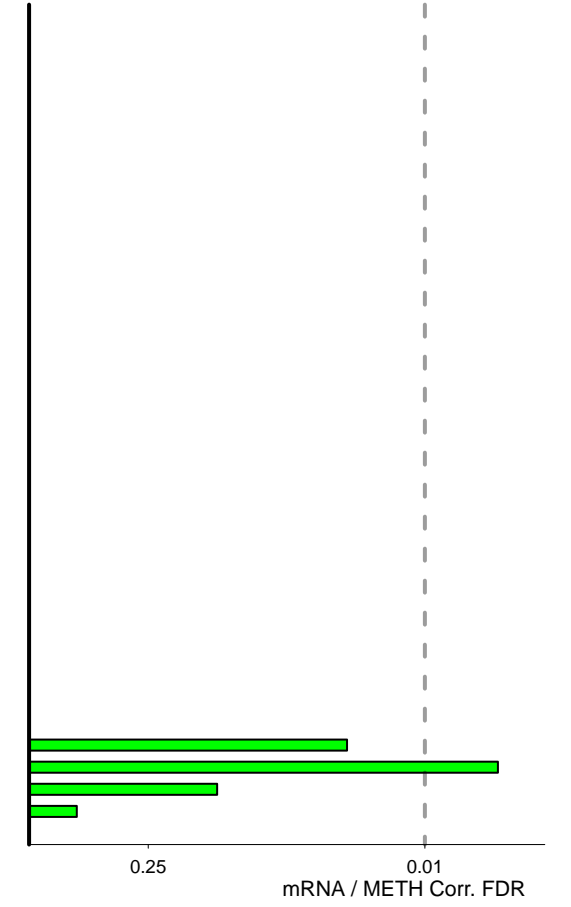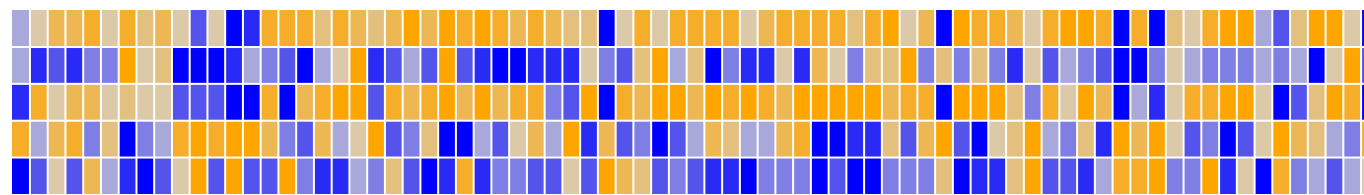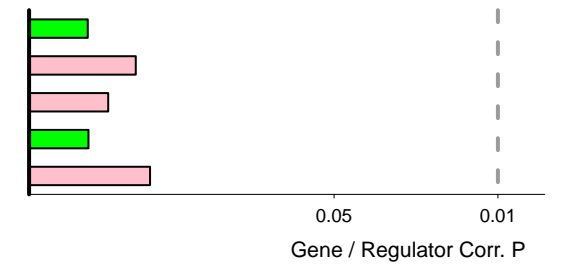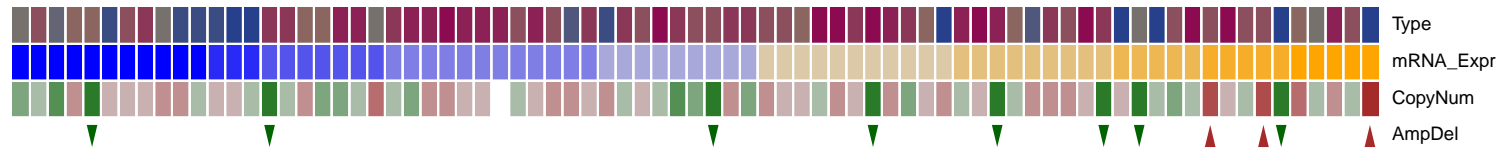

TCGA-EE-A20C-06  
 TCGA-DA-A95W-06  
 TCGA-EE-A2A5-06  
 TCGA-FS-A4FB-06  
 TCGA-D9-A6EC-06  
 TCGA-D3-A3MO-06  
 TCGA-EE-A17Z-06  
 TCGA-D3-A8GP-06  
 TCGA-EE-A3AH-06  
 TCGA-EE-A378-06  
 TCGA-WE-A8K6-06  
 TCGA-WE-A8ZO-06  
 TCGA-EE-A2GO-06  
 TCGA-EE-A42K-06  
 TCGA-EE-A29D-06  
 TCGA-D3-A3ML-06  
 TCGA-FS-A1ZT-06  
 TCGA-EE-A317-06  
 TCGA-EE-A3AD-06  
 TCGA-FS-A1ZY-06  
 TCGA-D3-A3C6-06  
 TCGA-D3-A1QA-06  
 TCGA-EE-A2GR-06  
 TCGA-GN-A8LL-06  
 TCGA-EE-A29E-06  
 TCGA-D3-A1QA-07  
 TCGA-W3-A824-06  
 TCGA-FS-A1ZZ-06  
 TCGA-DA-A95Z-06  
 TCGA-EE-A19L-06  
 TCGA-EE-A29B-06  
 TCGA-EE-A2MM-06  
 TCGA-3N-A9WB-06  
 TCGA-ER-A19F-06  
 TCGA-DA-A1IA-06  
 TCGA-RP-A695-06  
 TCGA-D9-A1X3-06  
 TCGA-FS-A4F9-06  
 TCGA-D3-A5GL-06  
 TCGA-W3-AA21-06  
 TCGA-FR-A7U8-06  
 TCGA-FS-A1ZE-06  
 TCGA-FS-A1YW-06  
 TCGA-EE-A29L-06  
 TCGA-EE-A185-06  
 TCGA-FS-A4F0-06  
 TCGA-GN-A8LK-06  
 TCGA-EE-A380-06  
 TCGA-FR-A6YD-06  
 TCGA-FS-A1Z3-06  
 TCGA-ER-A3ES-06  
 TCGA-ER-A4U7-06  
 TCGA-GN-A268-06  
 TCGA-WE-A8JZ-06  
 TCGA-WE-A8ZM-06  
 TCGA-FS-A1ZK-06  
 TCGA-YG-AA3P-06  
 TCGA-D3-A8GL-06  
 TCGA-EE-A3JI-06  
 TCGA-FS-A1ZC-06  
 TCGA-D3-A8GC-06  
 TCGA-EE-A29A-06  
 TCGA-FS-A1ZU-06  
 TCGA-D3-A8GK-06  
 TCGA-FS-A1ZG-06  
 TCGA-RP-A690-06  
 TCGA-D3-A8GV-06  
 TCGA-LH-A9OB-06  
 TCGA-FS-A4F5-06  
 TCGA-FW-A313-06  
 TCGA-D9-A4Z6-06  
 TCGA-D3-A8GI-06  
 TCGA-EE-A20H-06



# IGSF11

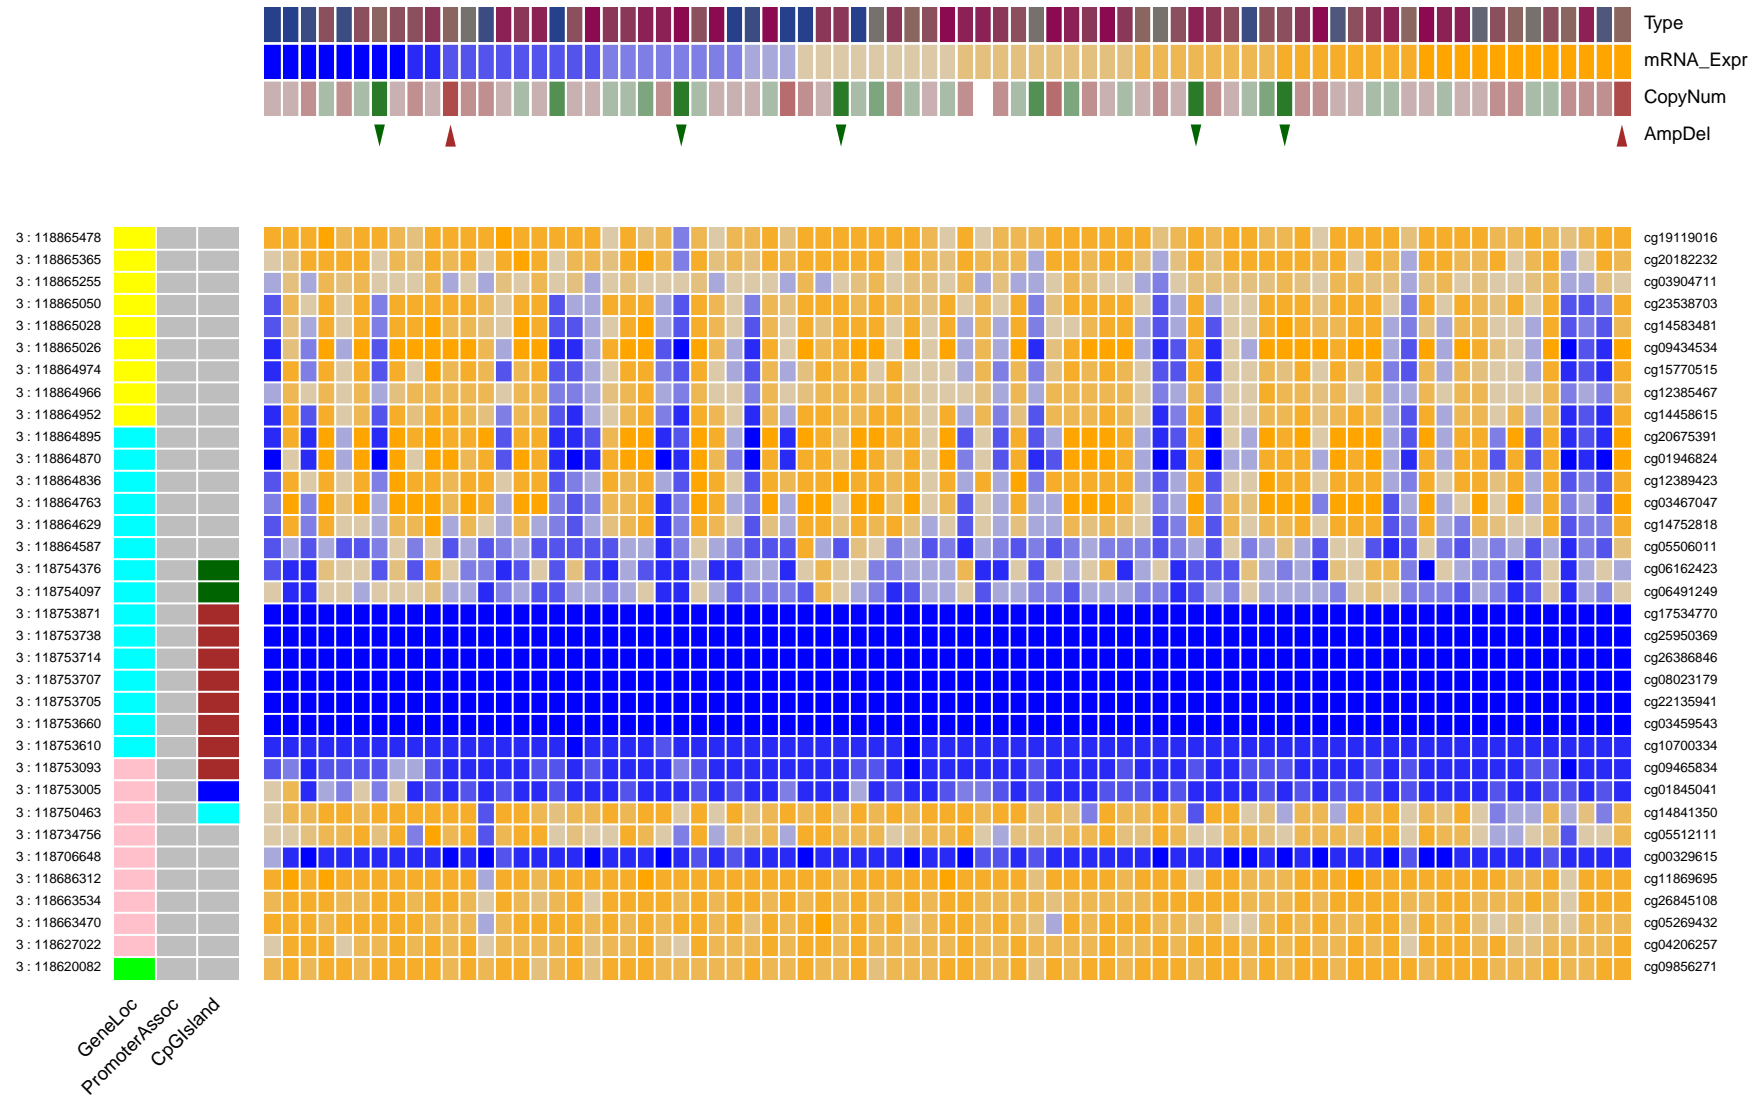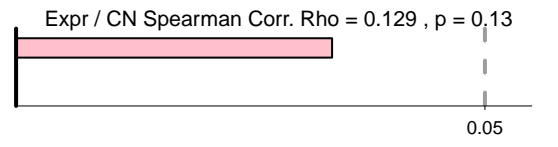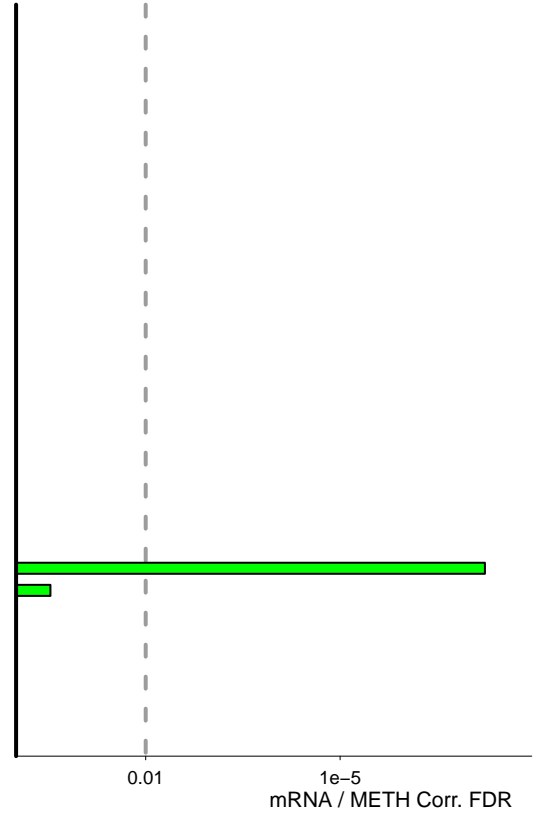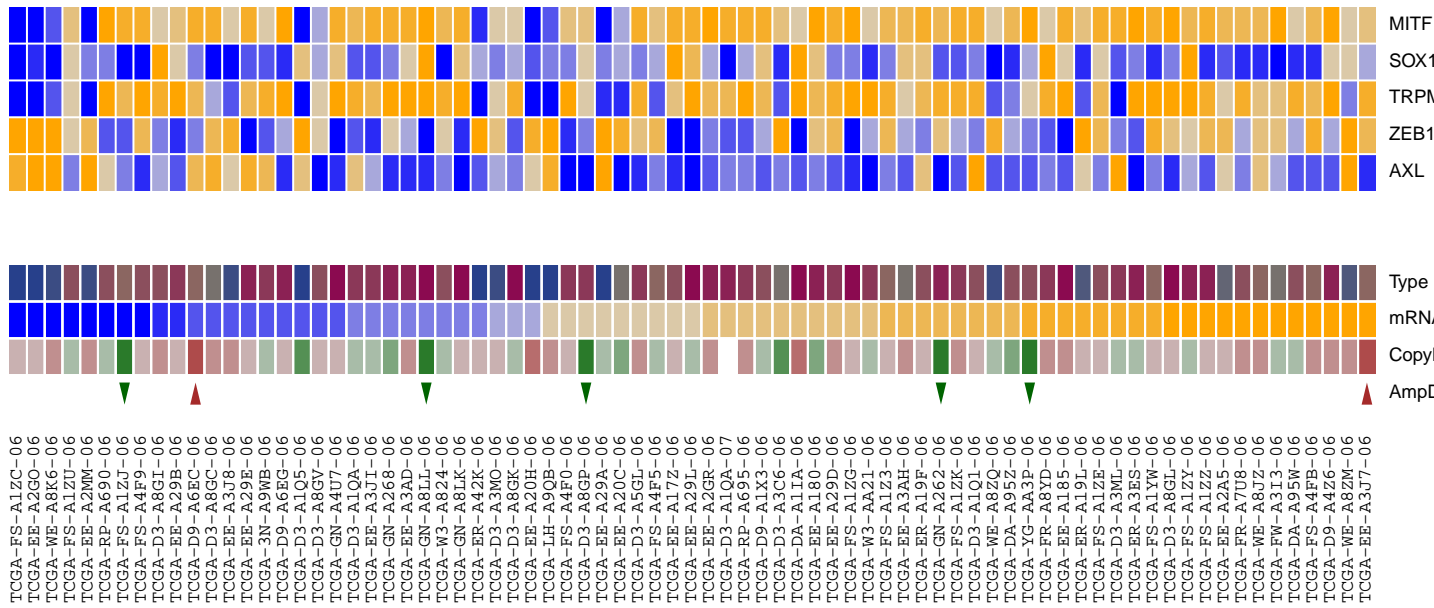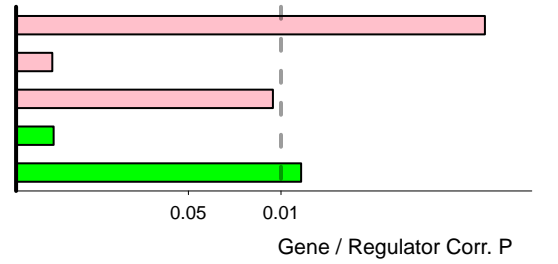

# EDNRB

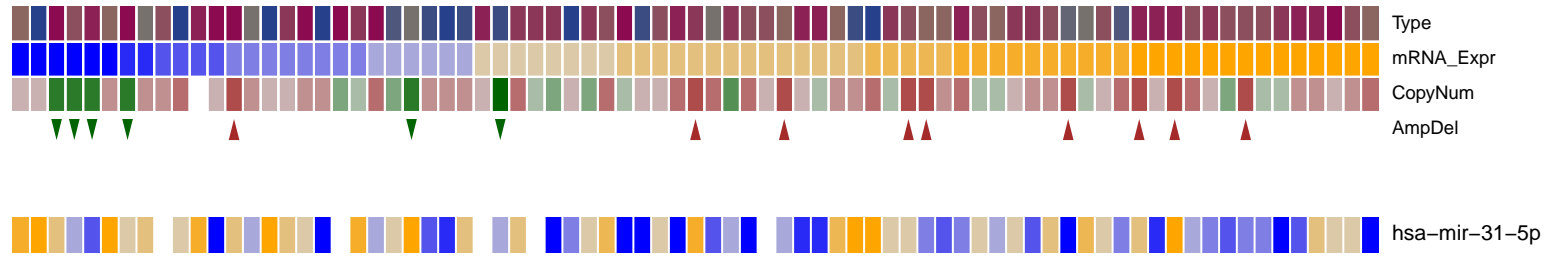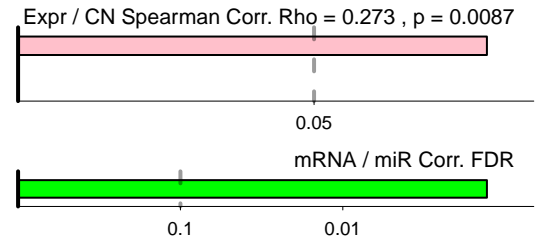

13 : 78494462  
13 : 78494442  
13 : 78494330  
13 : 78494272  
13 : 78494171  
13 : 78494067  
13 : 78494064  
13 : 78494010  
13 : 78493958  
13 : 78493920  
13 : 78493878  
13 : 78493874  
13 : 78493854  
13 : 78493712  
13 : 78493704  
13 : 78493671  
13 : 78493666  
13 : 78493657  
13 : 78493651  
13 : 78493631  
13 : 78493590  
13 : 78493583  
13 : 78493564  
13 : 78493561  
13 : 78493365  
13 : 78493349  
13 : 78493313  
13 : 78493305  
13 : 78493297  
13 : 78493294  
13 : 78493282  
13 : 78493232  
13 : 78493229  
13 : 78493205  
13 : 78493203  
13 : 78493182  
13 : 78493128  
13 : 78493126  
13 : 78493100  
13 : 78493066  
13 : 78493012  
13 : 78492922  
13 : 78492916  
13 : 78492730  
13 : 78492678  
13 : 78492568  
13 : 78492306  
13 : 78492216  
13 : 78491982  
13 : 78491199  
13 : 78470850  
13 : 78470739

GeneLoc  
PromoterAssoc  
CpIsland

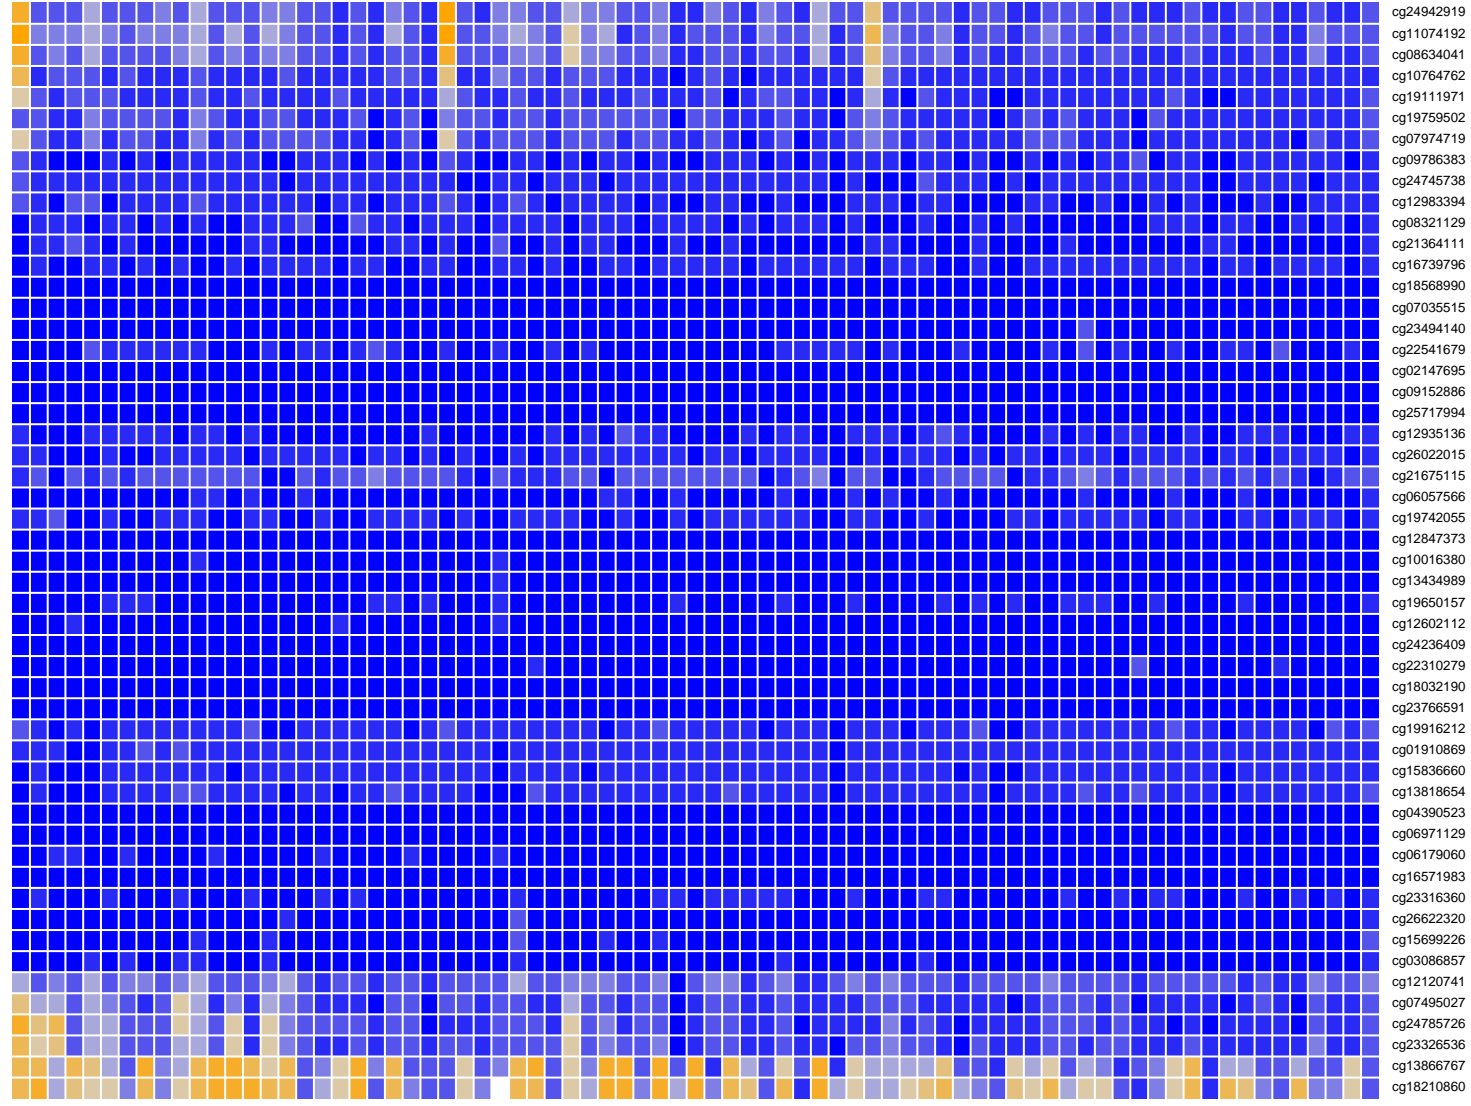

cg24942919  
cg11074192  
cg08634041  
cg10764762  
cg191111971  
cg19759502  
cg07974719  
cg09786383  
cg24745738  
cg12983394  
cg08321129  
cg21364111  
cg16739796  
cg18568990  
cg07035515  
cg23494140  
cg22541679  
cg02147695  
cg09152886  
cg25717994  
cg12935136  
cg26022015  
cg21675115  
cg06057566  
cg19742055  
cg12847373  
cg10016380  
cg13434989  
cg19650157  
cg12602112  
cg24236409  
cg22310279  
cg18032190  
cg23766591  
cg19916212  
cg01910869  
cg15836660  
cg13818654  
cg04390523  
cg06971129  
cg06179060  
cg16571983  
cg23316360  
cg26622320  
cg15699226  
cg03086857  
cg12120741  
cg07495027  
cg24785726  
cg23326536  
cg13866767  
cg18210860

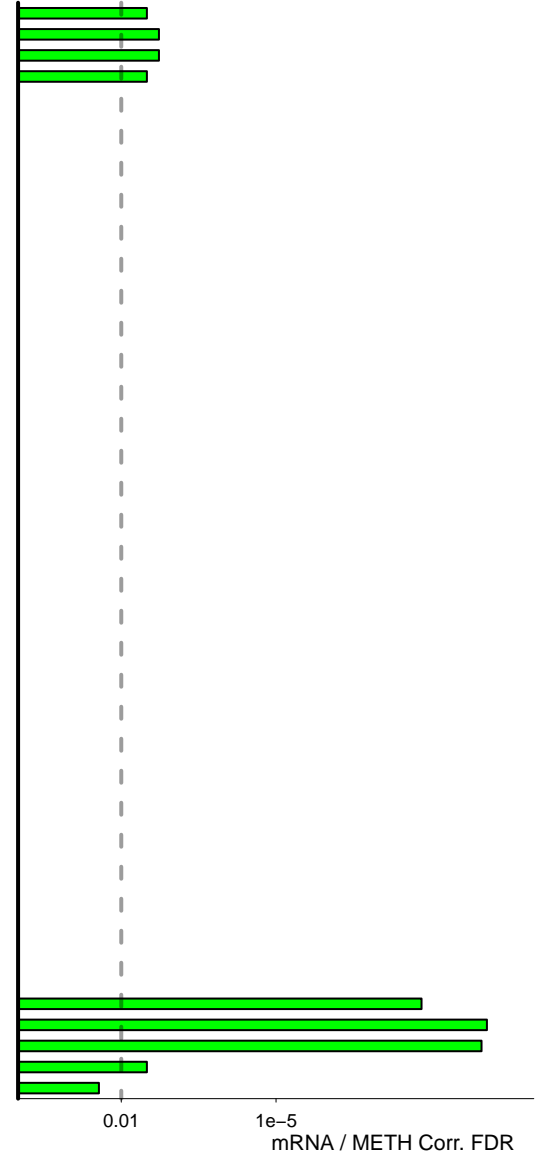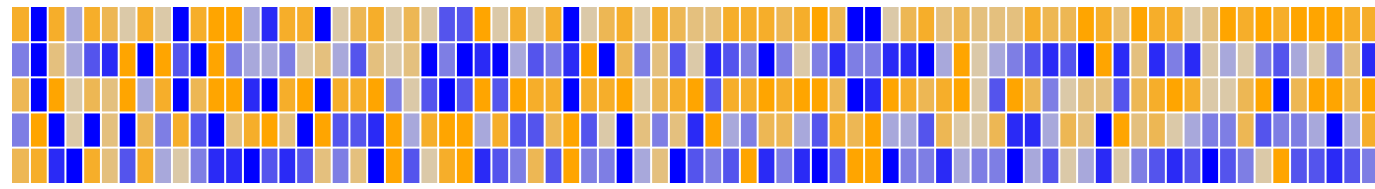

MITF  
SOX10  
TRPM1  
ZEB1  
AXL

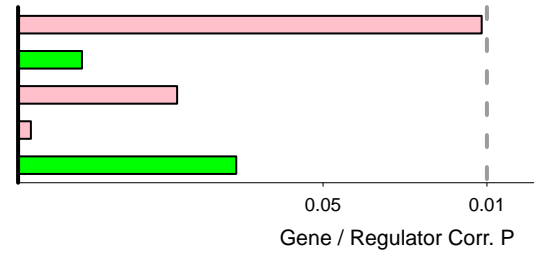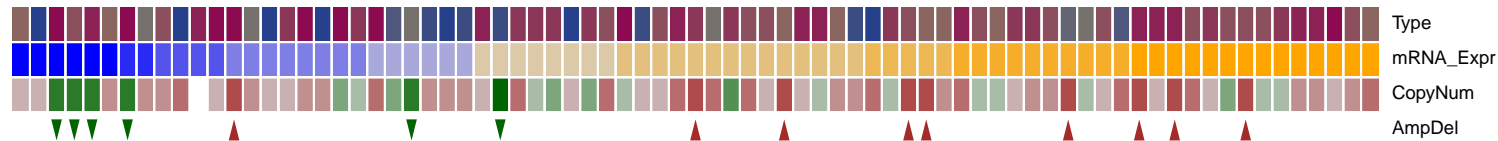

Type  
mRNA\_Expr  
CopyNum  
AmpDel

TCGA-D9-A6EC-06  
TCGA-FS-A1ZC-06  
TCGA-GN-A4U7-06  
TCGA-D3-A8GV-06  
TCGA-EE-A29E-06  
TCGA-WE-A8JZ-06  
TCGA-DA-A1IA-06  
TCGA-D3-A8GC-06  
TCGA-D3-A8GI-06  
TCGA-EE-A20H-06  
TCGA-D3-A1QA-07  
TCGA-GN-A8LI-06  
TCGA-D3-A8GI-06  
TCGA-EE-A20C-06  
TCGA-EE-A42K-06  
TCGA-D3-A5GI-06  
TCGA-EE-A185-06  
TCGA-D3-A1Q5-06  
TCGA-D3-A8GK-06  
TCGA-D3-A1QA-06  
TCGA-GN-A8LK-06  
TCGA-WE-A8ZM-06  
TCGA-EE-A3AH-06  
TCGA-EE-A3J8-06  
TCGA-LH-A9QB-06  
TCGA-WE-A8K6-06  
TCGA-D9-A6EG-06  
TCGA-WE-A8ZQ-06  
TCGA-RP-A695-06  
TCGA-3N-A9WB-06  
TCGA-EE-A29D-06  
TCGA-EE-A2GO-06  
TCGA-FR-A8YD-06  
TCGA-W3-A824-06  
TCGA-EE-A29L-06  
TCGA-D3-A3MO-06  
TCGA-ER-A19F-06  
TCGA-GN-A262-06  
TCGA-EE-A29B-06  
TCGA-D3-A3C6-06  
TCGA-D3-A1O1-06  
TCGA-FS-A4F9-06  
TCGA-FS-A1Z3-06  
TCGA-EE-A3AD-06  
TCGA-EE-A3ES-06  
TCGA-FS-A4FB-06  
TCGA-EE-A2MM-06  
TCGA-EE-A29A-06  
TCGA-W3-AA21-06  
TCGA-ER-A7U8-06  
TCGA-FS-A1ZU-06  
TCGA-EE-A3J7-06  
TCGA-FS-A1ZY-06  
TCGA-FS-A1ZU-06  
TCGA-FS-A4F5-06  
TCGA-FS-A4F0-06  
TCGA-EE-A3JI-06  
TCGA-DA-A95Z-06  
TCGA-EE-A2A5-06  
TCGA-FW-A3I3-06  
TCGA-EE-A17Z-06  
TCGA-EE-A19L-06  
TCGA-EE-A180-06  
TCGA-FS-A1ZZ-06  
TCGA-GN-A268-06  
TCGA-DA-A95W-06  
TCGA-D3-A8GP-06  
TCGA-YG-AA3P-06  
TCGA-FS-A1ZE-06  
TCGA-RP-A690-06  
TCGA-D3-A3ML-06  
TCGA-EE-A2GR-06  
TCGA-D9-A4Z6-06  
TCGA-FS-A1ZG-06  
TCGA-D9-A1X3-06  
TCGA-FS-A1YW-06

# GYG2

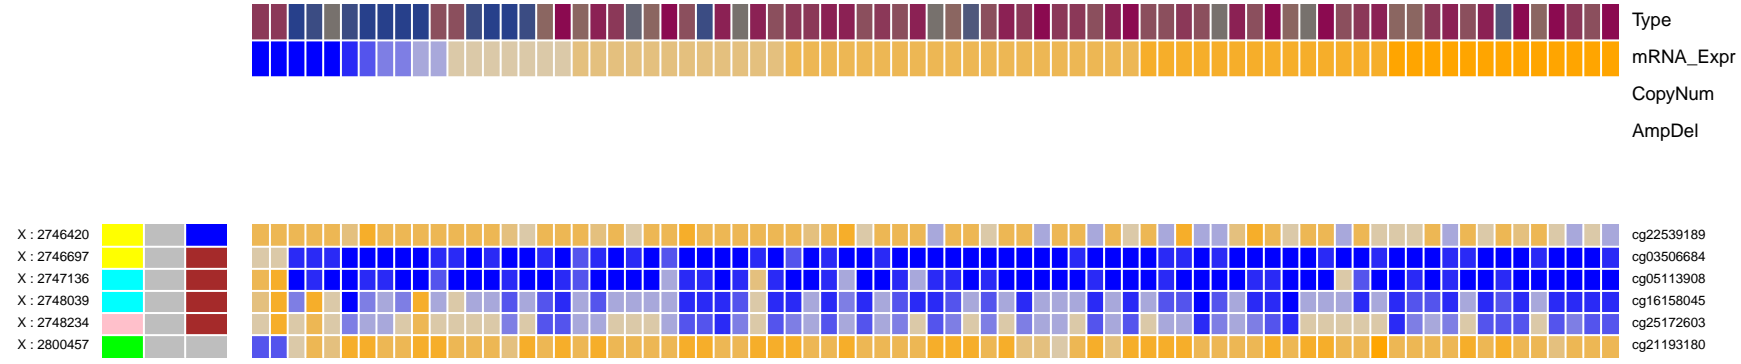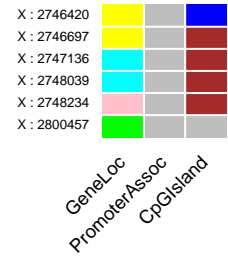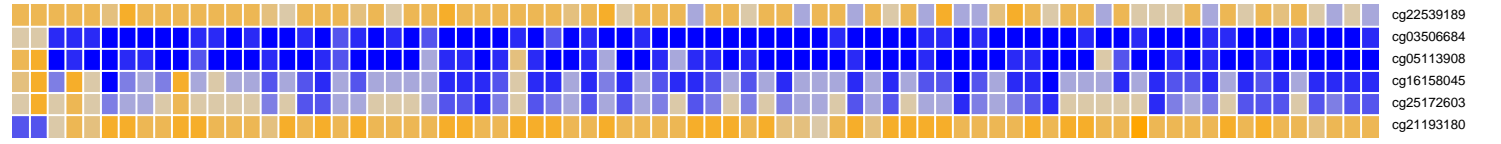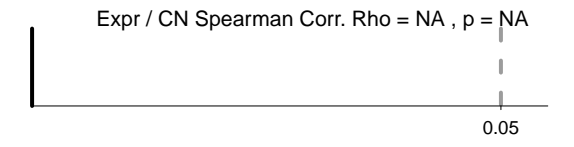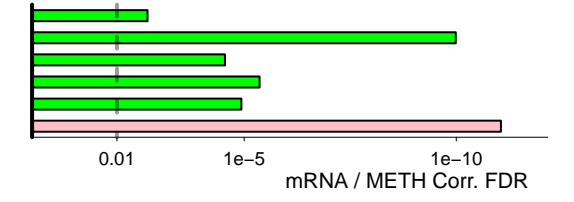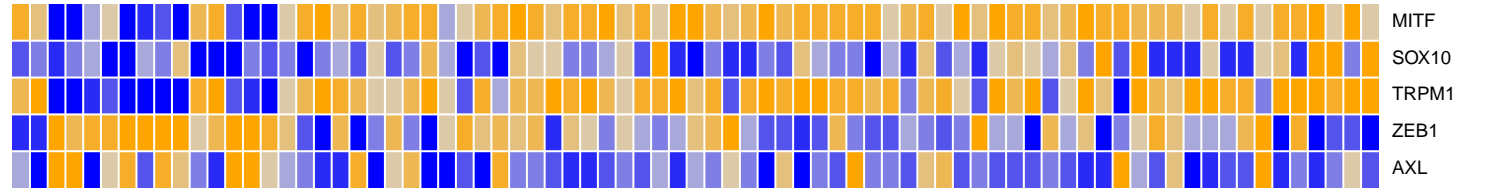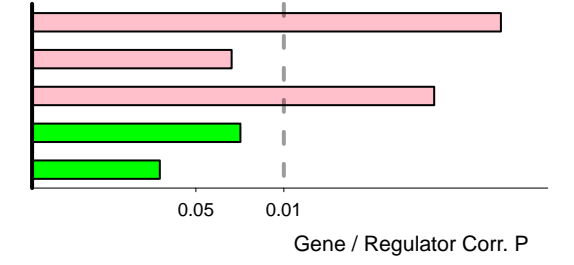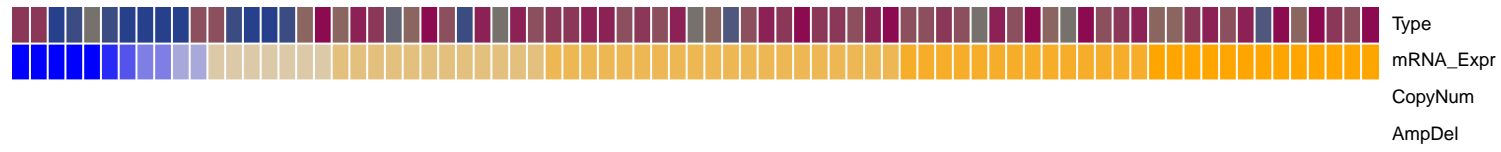

TCGA-EE-A3JI-06  
TCGA-FS-A4FO-06  
TCGA-EE-A2GO-06  
TCGA-EE-A2MM-06  
TCGA-EE-A20C-06  
TCGA-EE-A3J8-06  
TCGA-FS-A1ZC-06  
TCGA-ER-A42K-06  
TCGA-LH-A90B-06  
TCGA-D3-A105-06  
TCGA-W3-A824-06  
TCGA-FS-A4F9-06  
TCGA-WE-A8K6-06  
TCGA-EE-A29A-06  
TCGA-EE-A20H-06  
TCGA-D3-A3MO-06  
TCGA-FS-A1Z3-06  
TCGA-FS-A1Z6-06  
TCGA-EE-A3U7-06  
TCGA-EE-A29E-06  
TCGA-D3-A8GF-06  
TCGA-EE-A2A5-06  
TCGA-D9-A6EC-06  
TCGA-EE-A29L-06  
TCGA-D3-A8GV-06  
TCGA-WE-A8ZQ-06  
TCGA-GN-A262-06  
TCGA-D3-A8GC-06  
TCGA-EE-A180-06  
TCGA-EE-A12E-06  
TCGA-EE-A29B-06  
TCGA-D3-A5GL-06  
TCGA-EE-A2GR-06  
TCGA-FS-A1ZU-06  
TCGA-FS-A1ZK-06  
TCGA-D3-A8GI-06  
TCGA-D9-A6EG-06  
TCGA-FW-A3I3-06  
TCGA-FS-A1Z3-06  
TCGA-ER-A19L-06  
TCGA-ER-A7U8-06  
TCGA-ER-A3ES-06  
TCGA-D3-A10A-06  
TCGA-GN-A8LK-06  
TCGA-EE-A695-06  
TCGA-EE-A29D-06  
TCGA-EE-A101-06  
TCGA-D3-A10A-07  
TCGA-D3-A8SK-06  
TCGA-DA-A95Z-06  
TCGA-ER-A19F-06  
TCGA-ER-A9WB-06  
TCGA-YG-AA3P-06  
TCGA-D3-A3C6-06  
TCGA-D9-A4Z6-06  
TCGA-EE-A1X3-06  
TCGA-EE-A185-06  
TCGA-FS-A4F5-06  
TCGA-EE-A3AH-06  
TCGA-D3-A8GL-06  
TCGA-EE-A17Z-06  
TCGA-D3-A3ML-06  
TCGA-FS-A1ZY-06  
TCGA-FS-A4FB-06  
TCGA-WE-A8JZ-06  
TCGA-W3-AA21-06  
TCGA-EE-A3AD-06  
TCGA-DA-A95W-06  
TCGA-FS-A1ZZ-06  
TCGA-WE-A8ZM-06  
TCGA-GN-A4U7-06  
TCGA-FS-A1YW-06  
TCGA-GN-A8LL-06  
TCGA-ER-A8YD-06  
TCGA-ER-A690-06  
TCGA-DA-A1IA-06

# CAPN3

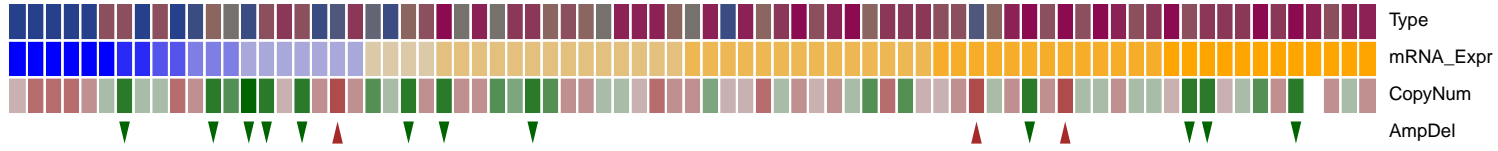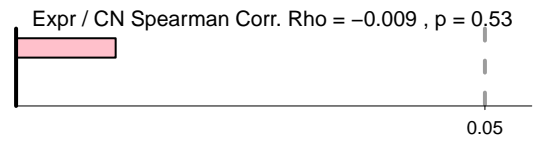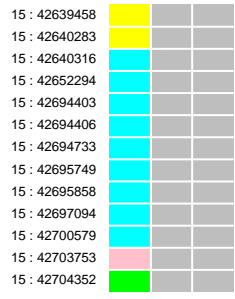

GeneLoc  
PromoterAssoc  
CpGIsland

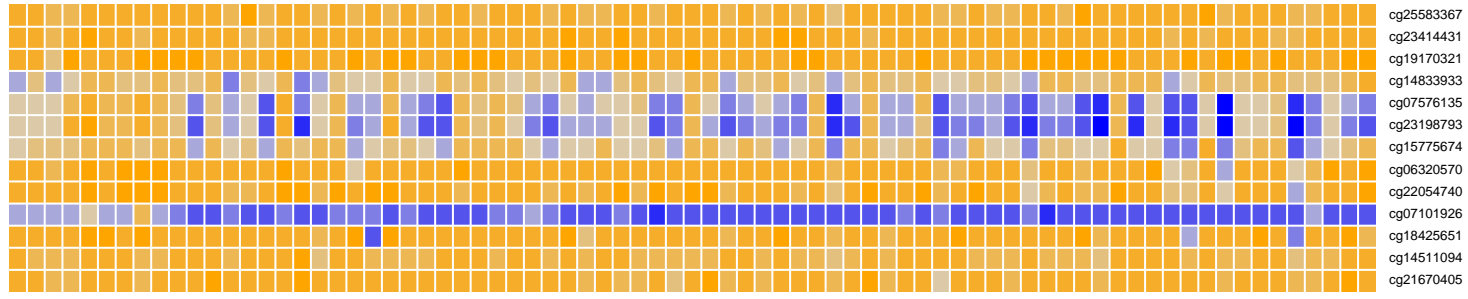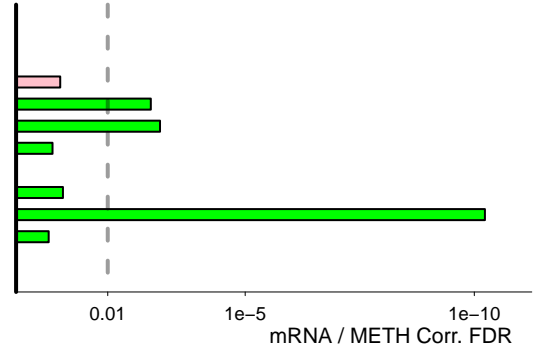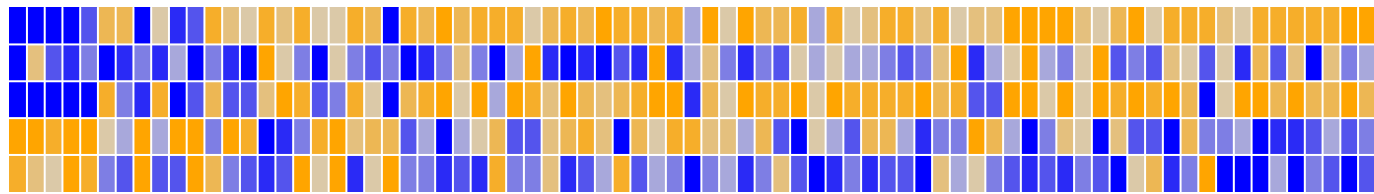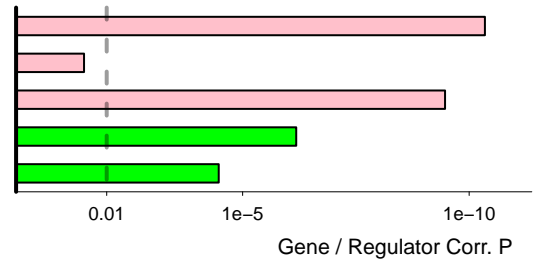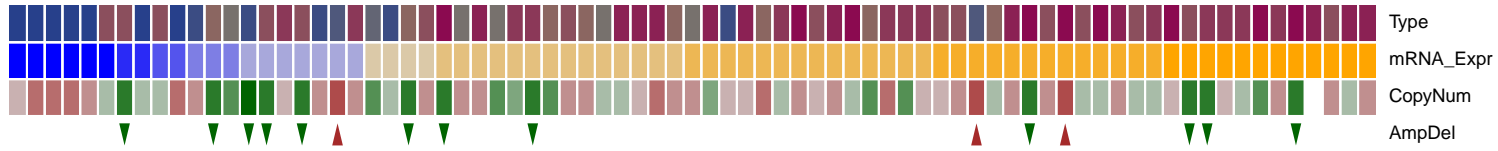

TCGA-FS-A1ZC-06  
TCGA-D3-A1Q5-06  
TCGA-EE-A20H-06  
TCGA-EE-A2G0-06  
TCGA-LH-A9QB-06  
TCGA-W3-A824-06  
TCGA-DA-A95Z-06  
TCGA-EE-A29A-06  
TCGA-DA-A95W-06  
TCGA-ER-A42K-06  
TCGA-WE-A8K6-06  
TCGA-D9-A6RC-06  
TCGA-D3-A3C6-06  
TCGA-WE-A8Z0-06  
TCGA-EE-A17Z-06  
TCGA-EE-A29B-06  
TCGA-D3-A1O1-06  
TCGA-EE-A3J8-06  
TCGA-WE-A8ZM-06  
TCGA-D3-A5GL-06  
TCGA-EE-A2A5-06  
TCGA-EE-A2MM-06  
TCGA-FS-A1ZU-06  
TCGA-FR-A7U8-06  
TCGA-FS-A1ZG-06  
TCGA-EE-A3AH-06  
TCGA-D3-A8GC-06  
TCGA-RP-A695-06  
TCGA-FR-A8YD-06  
TCGA-WE-A8JZ-06  
TCGA-FS-A4F9-06  
TCGA-FS-A4FB-06  
TCGA-FW-A3I3-06  
TCGA-EE-A29E-06  
TCGA-FS-A1ZY-06  
TCGA-FS-A1YW-06  
TCGA-EE-A20C-06  
TCGA-EE-A180-06  
TCGA-D3-A3MO-06  
TCGA-D9-A6RC-06  
TCGA-FS-A1Z3-06  
TCGA-D3-A1QA-06  
TCGA-EE-A185-06  
TCGA-EE-A3AD-06  
TCGA-EE-A3AD-06  
TCGA-D3-A8GK-06  
TCGA-EE-A377-06  
TCGA-EE-A29D-06  
TCGA-FS-A1ZK-06  
TCGA-FS-A4E0-06  
TCGA-ER-A19F-06  
TCGA-D3-A8GL-06  
TCGA-ER-A19L-06  
TCGA-FS-A4F5-06  
TCGA-D9-A4Z6-06  
TCGA-GN-A8LL-06  
TCGA-YG-AA3P-06  
TCGA-D3-A8GL-06  
TCGA-FS-A1ZU-06  
TCGA-DA-A1IA-06  
TCGA-GN-A262-06  
TCGA-RP-A690-06  
TCGA-3N-A9WB-06  
TCGA-GN-A4U7-06  
TCGA-FS-A1ZE-06  
TCGA-D3-A3ML-06  
TCGA-W3-A8GP-06  
TCGA-W3-AA21-06  
TCGA-EE-A29L-06  
TCGA-EE-A3JI-06  
TCGA-GN-A8LK-06  
TCGA-D3-A1QA-07  
TCGA-D9-A1X3-06  
TCGA-ER-A3FS-06  
TCGA-EE-A2GR-06

# BEST1

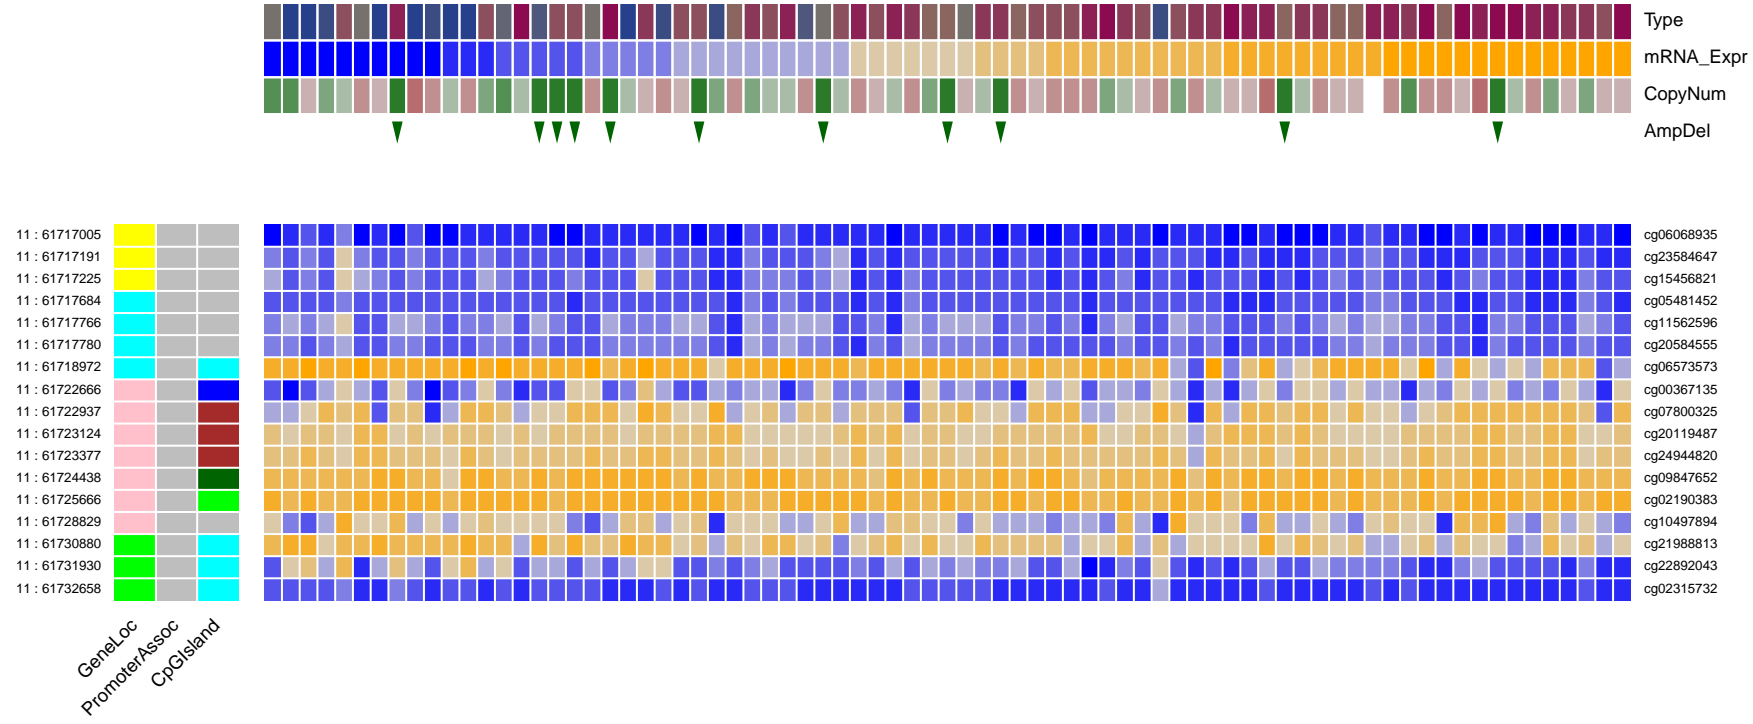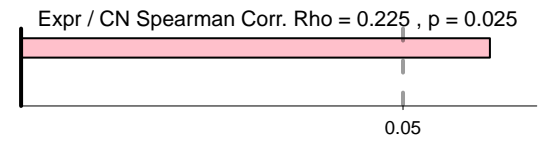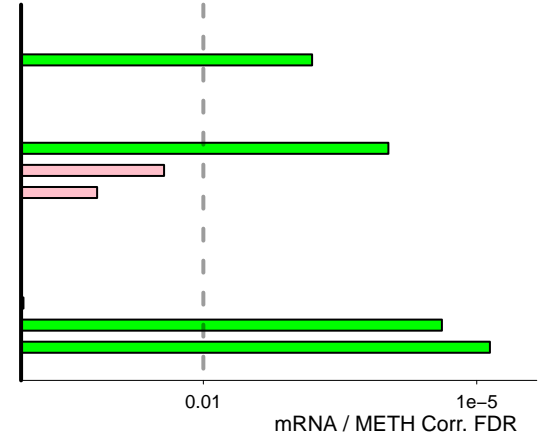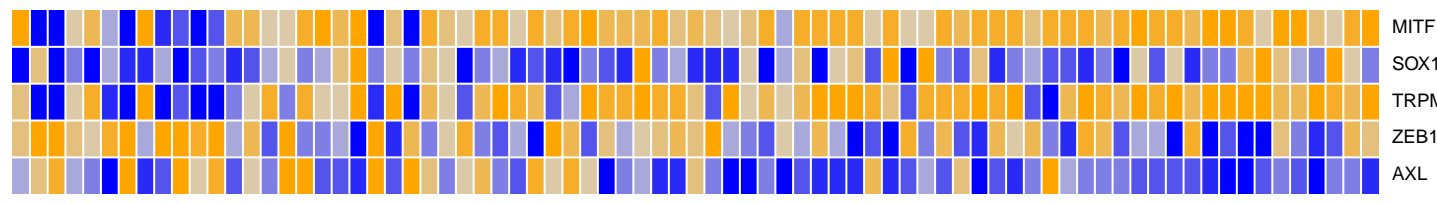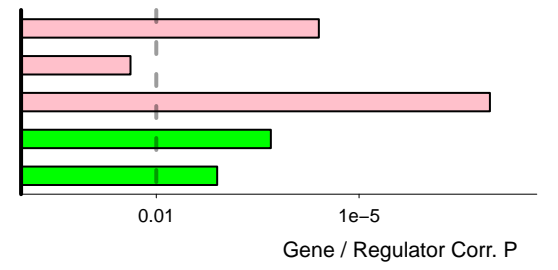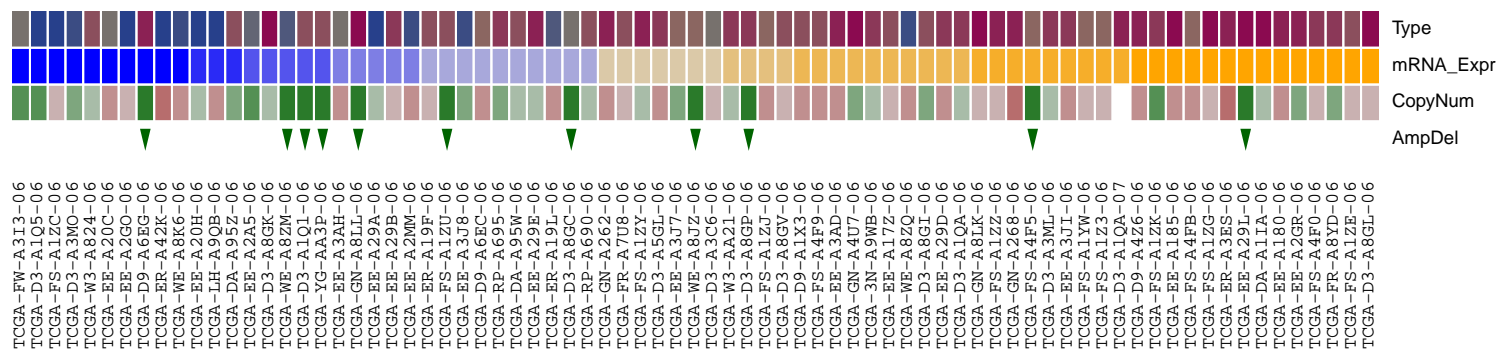

# IRF4

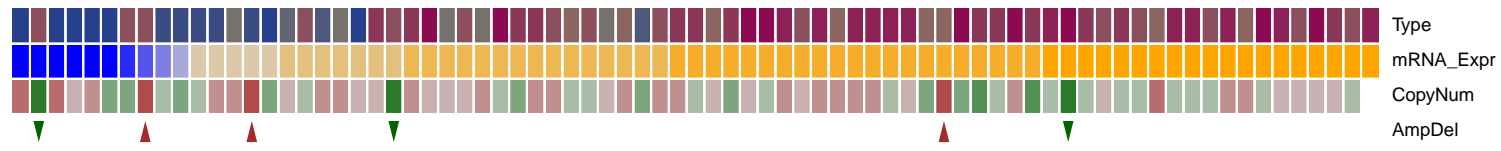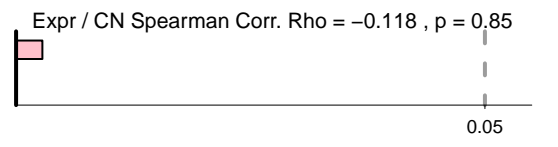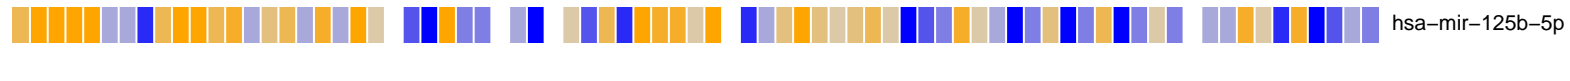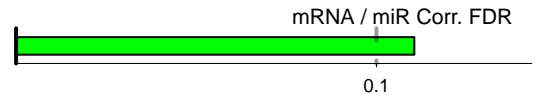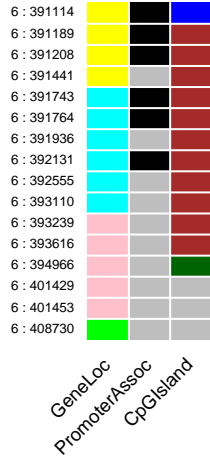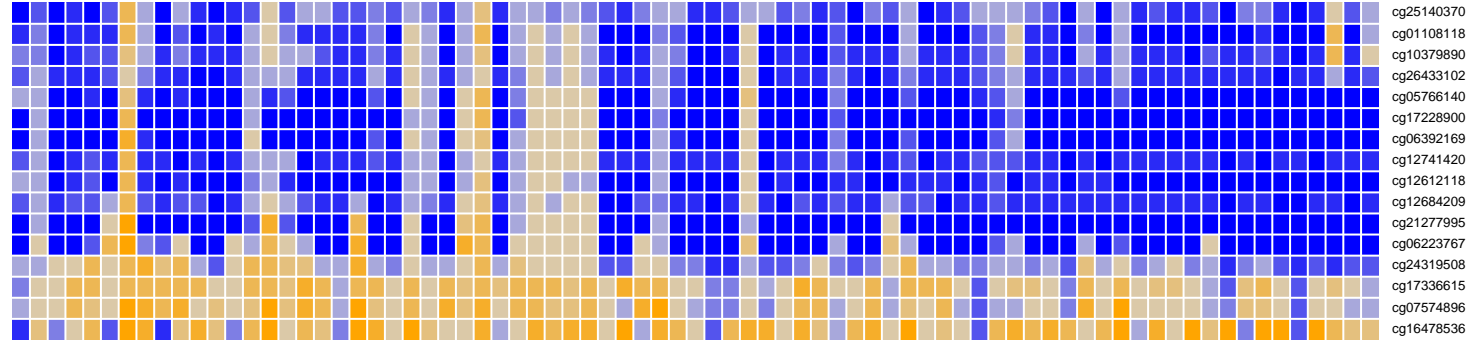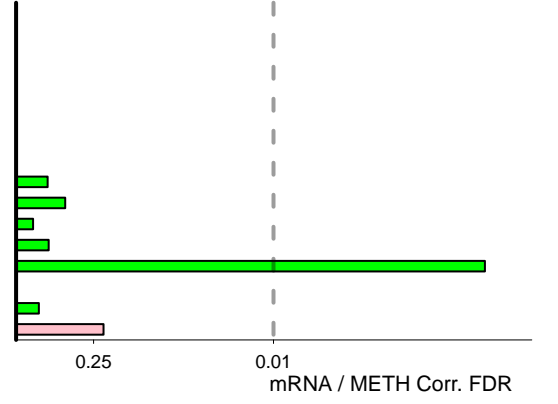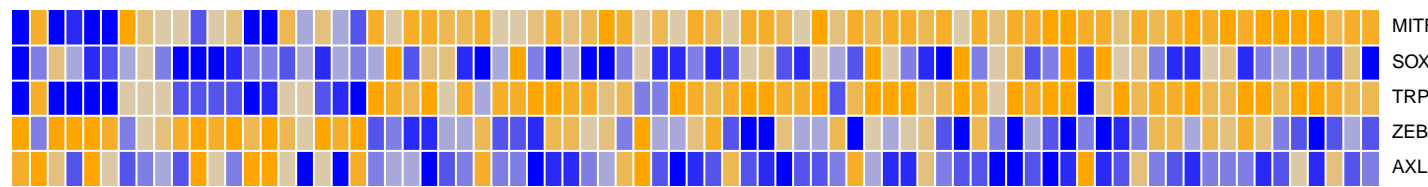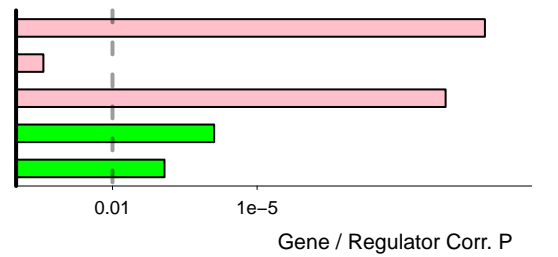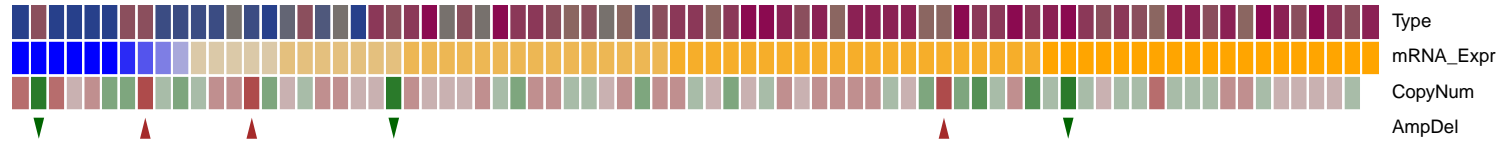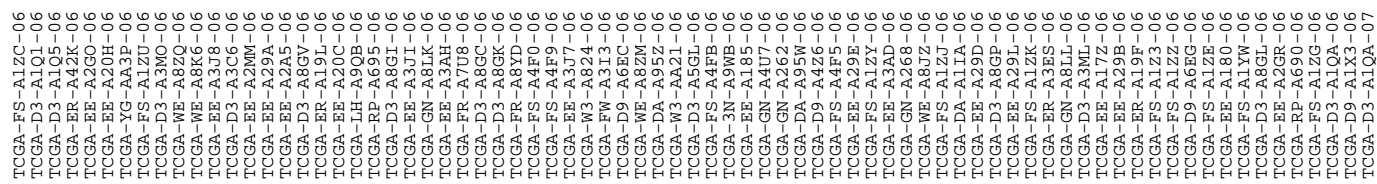

# OCA2

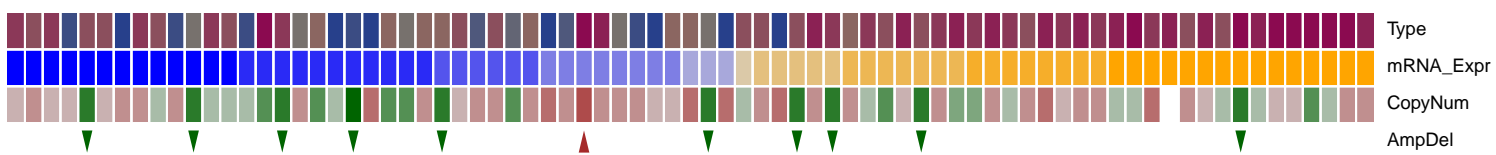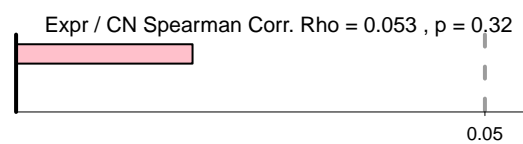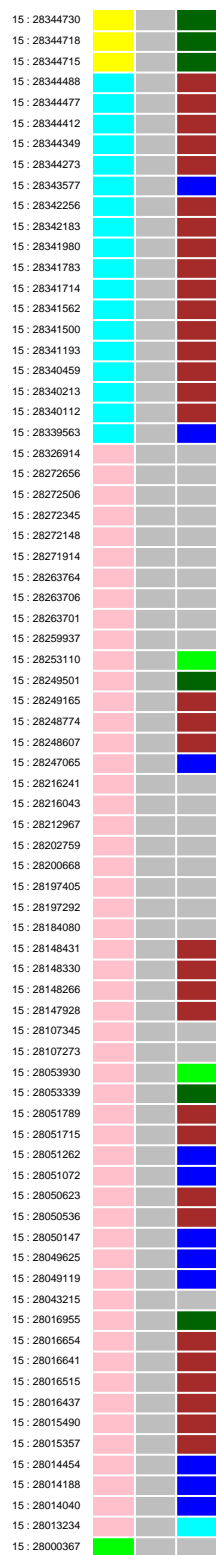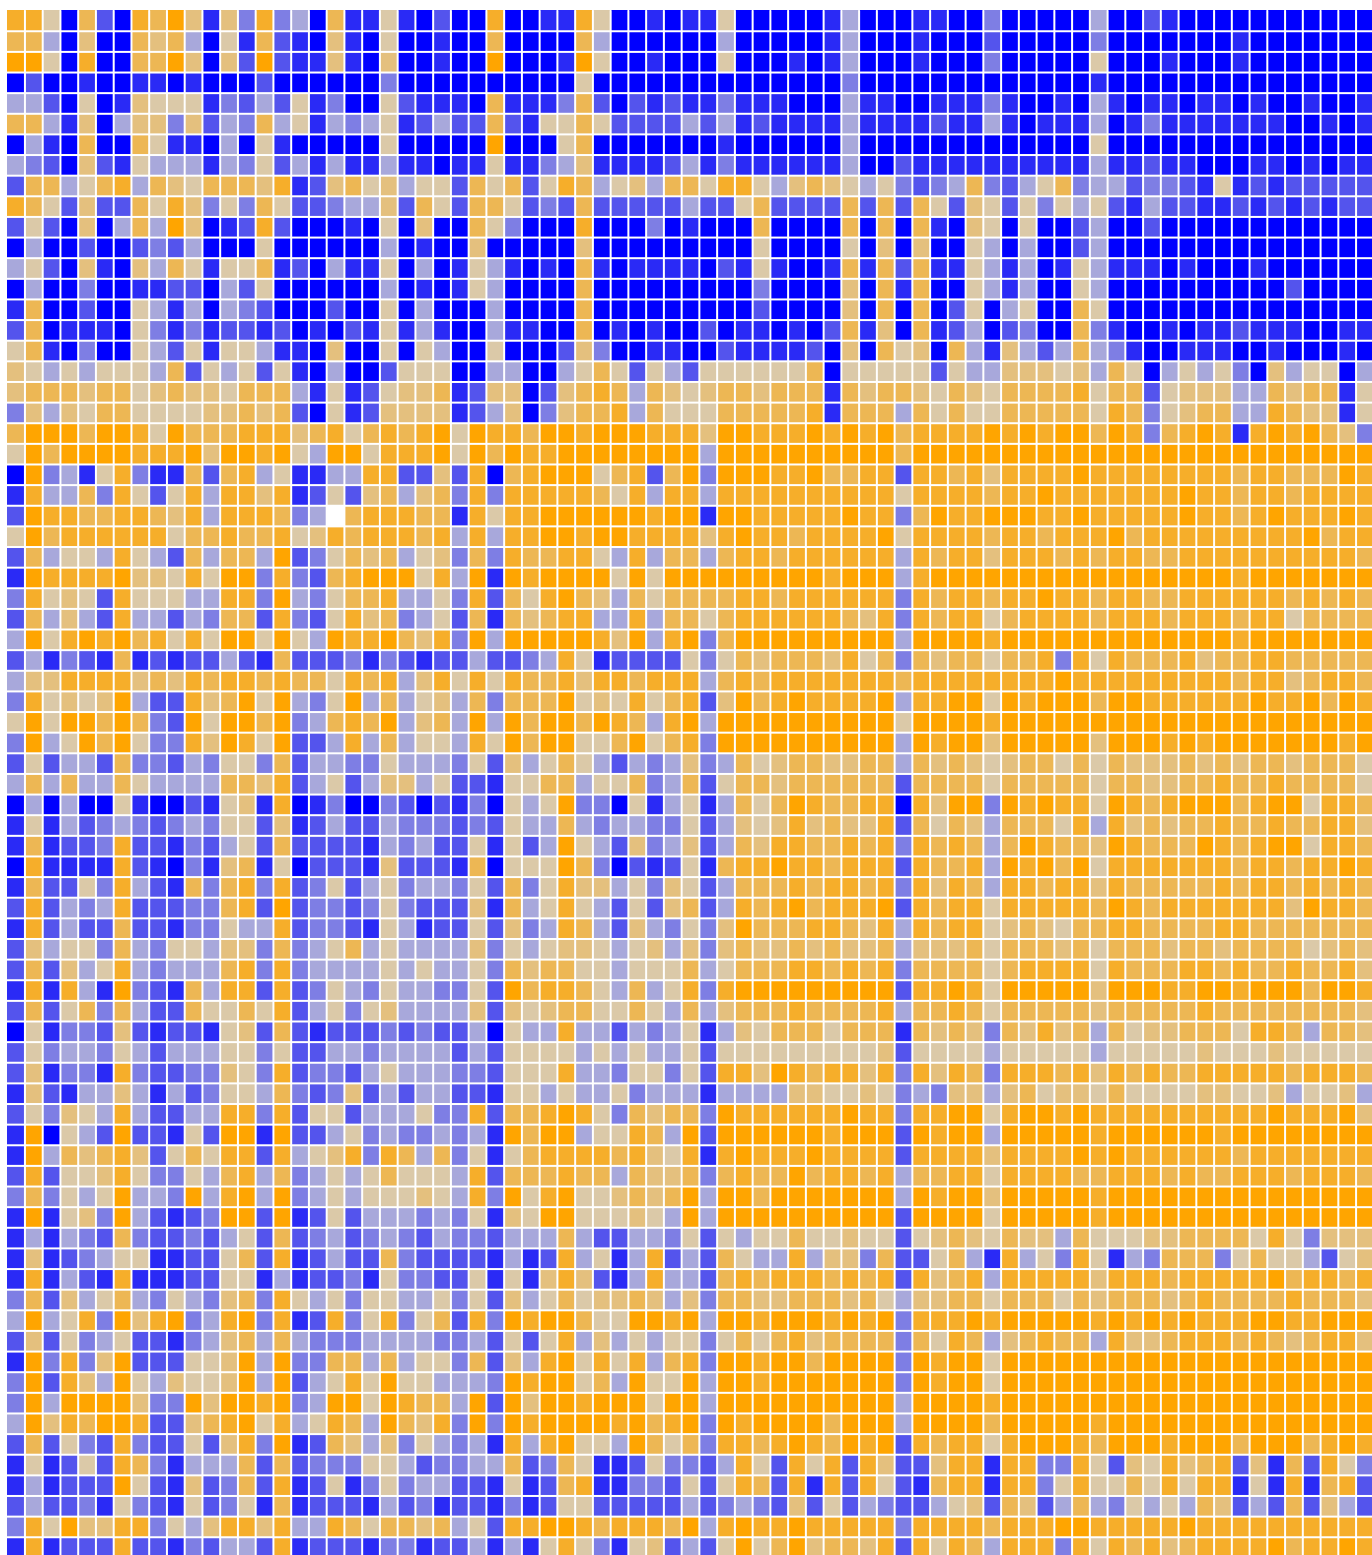

cg20698924  
cg15885628  
cg10762626  
cg11510839  
cg21567504  
cg12902039  
cg21323441  
cg22513857  
cg13963891  
cg12726354  
cg09792204  
cg15278646  
cg07193234  
cg04744917  
cg00020649  
cg05257397  
cg13292650  
cg14494623  
cg07577267  
cg02312175  
cg20703122  
cg17926792  
cg27289662  
cg04855249  
cg03357803  
cg23513095  
cg26216730  
cg13331179  
cg19890533  
cg23908019  
cg16973568  
cg13569101  
cg06841693  
cg00661719  
cg27381418  
cg11828966  
cg23744121  
cg23069177  
cg21643429  
cg25605243  
cg19571715  
cg20906524  
cg06996940  
cg02420024  
cg20129314  
cg25744277  
cg07138793  
cg17519696  
cg11684572  
cg27320242  
cg20311232  
cg26402630  
cg24943998  
cg09554898  
cg18456782  
cg13956907  
cg18248869  
cg18355120  
cg18175898  
cg27658068  
cg26426112  
cg10416294  
cg10266600  
cg19927328  
cg10948657  
cg0564836  
cg25454647  
cg18230627  
cg18201070  
cg05328667  
cg15843691  
cg10273821  
cg15194100  
cg17179195  
cg26388707

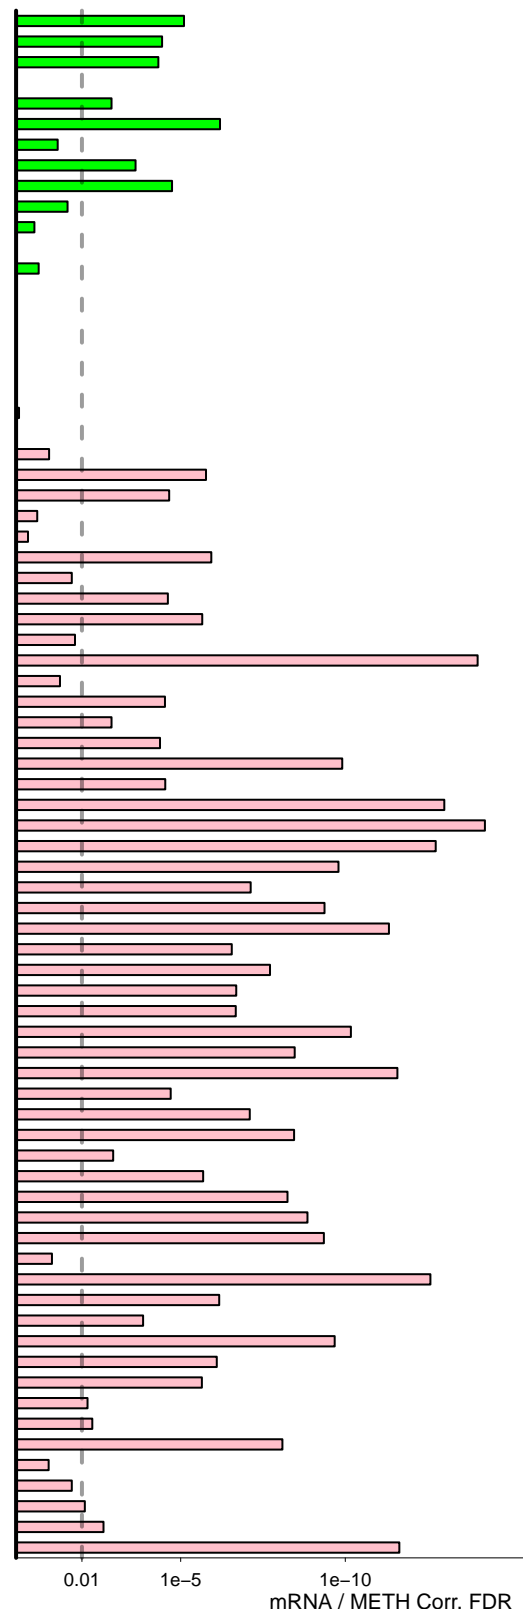

GeneLoc  
PromoterAssoc  
CpGIsland

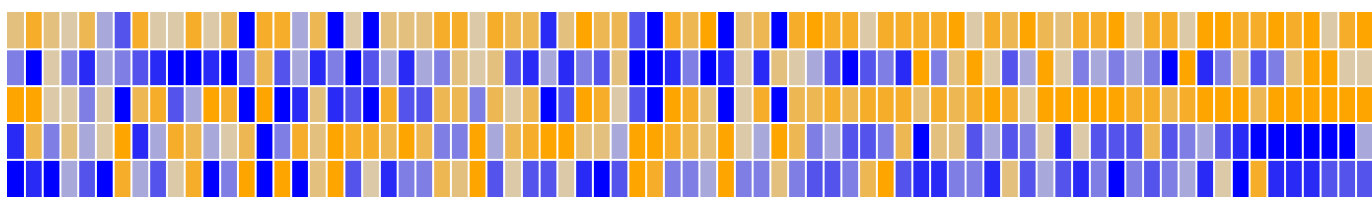

MITF  
SOX10  
TRPM1  
ZEB1  
AXL

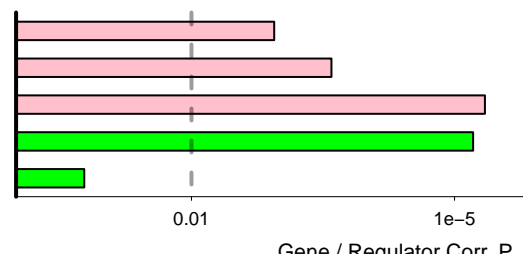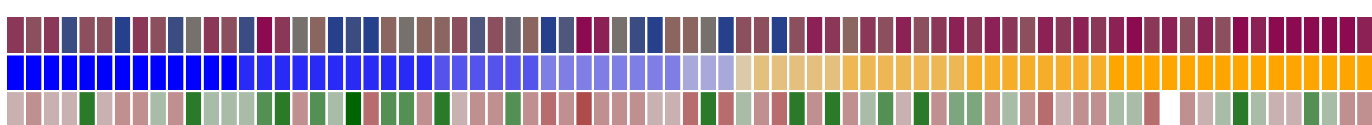

Type  
mRNA\_Expr  
CopyNum  
AmpDel

TCGA-FS-A4F0-06  
TCGA-FS-A4F9-06  
TCGA-D3-A8GP-06  
TCGA-D3-A3MO-06  
TCGA-DA-A95Z-06  
TCGA-D3-A8GV-06  
TCGA-LH-A9OB-06  
TCGA-EE-A3J1-06  
TCGA-DA-A95W-06  
TCGA-EE-A3I8-06  
TCGA-D3-A8GC-06  
TCGA-W3-AA21-06  
TCGA-W3-AA24-06  
TCGA-EE-A2MM-06  
TCGA-EE-A291-06  
TCGA-D3-A3M1-06  
TCGA-EE-A2OC-06  
TCGA-WE-A8JZ-06  
TCGA-EE-A29A-06  
TCGA-WE-A8QC-06  
TCGA-EE-A20H-06  
TCGA-EE-A3J7-06  
TCGA-D3-A3C6-06  
TCGA-FS-A4F5-06  
TCGA-D9-A6EC-06  
TCGA-ER-A19F-06  
TCGA-WE-A8ZM-06  
TCGA-D9-A1X3-06  
TCGA-EE-A2A5-06  
TCGA-FS-A4FB-06  
TCGA-ER-A42K-06  
TCGA-ER-A19L-06  
TCGA-D3-A8GL-06  
TCGA-GN-A262-06  
TCGA-EE-A3AH-06  
TCGA-WE-A8K6-06  
TCGA-FS-A1ZC-06  
TCGA-FS-A1Z3-06  
TCGA-FW-A3I3-06  
TCGA-EE-A2GO-06  
TCGA-FR-A7H8-06  
TCGA-FS-A1ZU-06  
TCGA-D3-A1O5-06  
TCGA-EE-A23R-06  
TCGA-FS-A1ZE-06  
TCGA-FS-A1ZK-06  
TCGA-FS-A1ZT-06  
TCGA-3N-A9WB-06  
TCGA-D3-A1O1-06  
TCGA-FS-A1ZV-06  
TCGA-EE-A1Z7-06  
TCGA-EE-A1Z8-06  
TCGA-D3-A5GJ-06  
TCGA-EE-A1S0-06  
TCGA-FR-A8TD-06  
TCGA-EE-A3AD-06  
TCGA-D3-A1QA-06  
TCGA-FS-A1ZY-06  
TCGA-EE-A29B-06  
TCGA-GN-A268-06  
TCGA-RP-A695-06  
TCGA-ER-A3ES-06  
TCGA-D3-A8GK-06  
TCGA-EE-A29D-06  
TCGA-D3-A1QA-07  
TCGA-D9-A6EG-06  
TCGA-RP-A690-06  
TCGA-GN-A8LK-06  
TCGA-EE-A29E-06  
TCGA-FS-A1ZG-06  
TCGA-GN-A4U7-06  
TCGA-DA-A1IA-06  
TCGA-EE-A185-06  
TCGA-D9-A4Z6-06

# TBC1D7

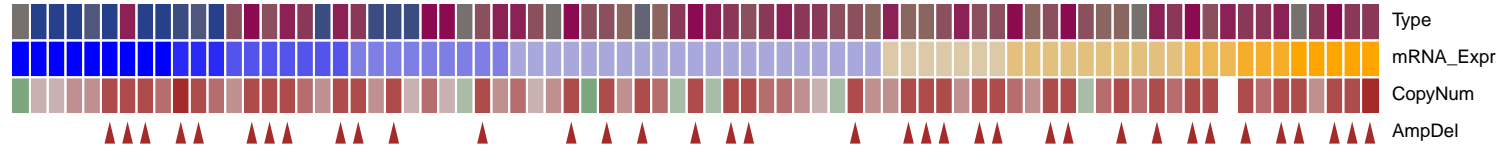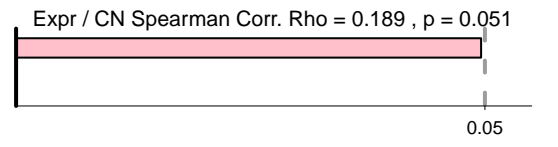

6 : 13329625  
6 : 13329084  
6 : 13329023  
6 : 13328969  
6 : 13328957  
6 : 13328928  
6 : 13328826  
6 : 13328824  
6 : 13328662  
6 : 13328569  
6 : 13328449  
6 : 13328442  
6 : 13326305  
6 : 13305324  
6 : 13303065  
6 : 13296149  
6 : 13295561  
6 : 13287503  
6 : 13274354  
6 : 13274314  
6 : 13274284  
6 : 13274180  
6 : 13274151

GeneLoc  
PromoterAssoc  
CpGIsland

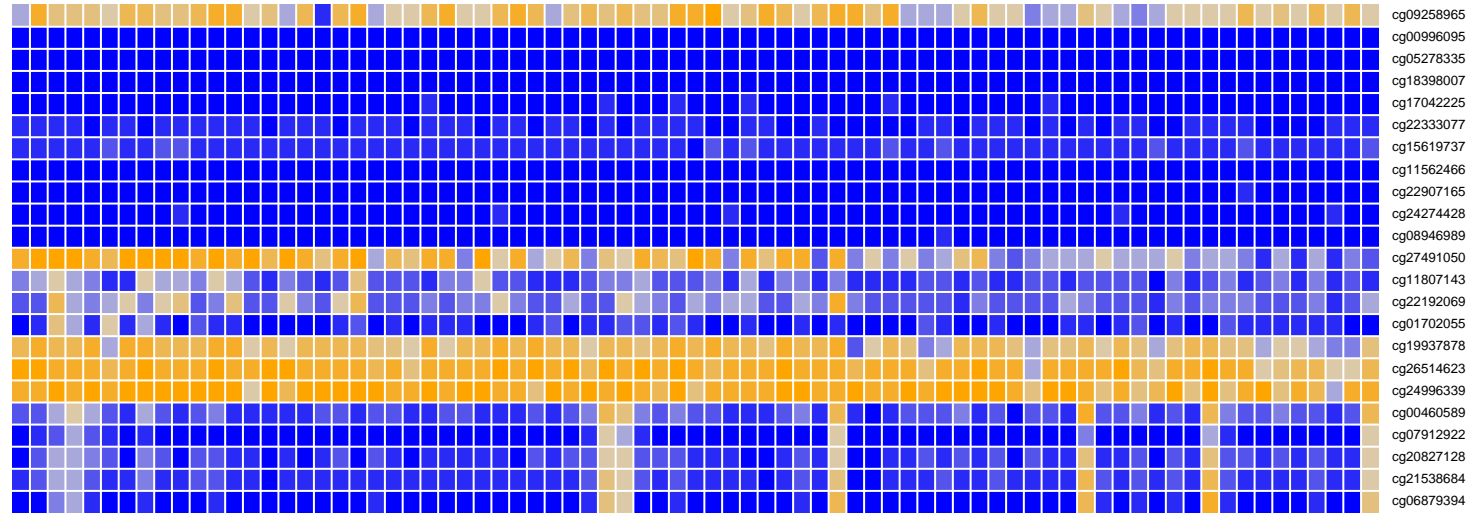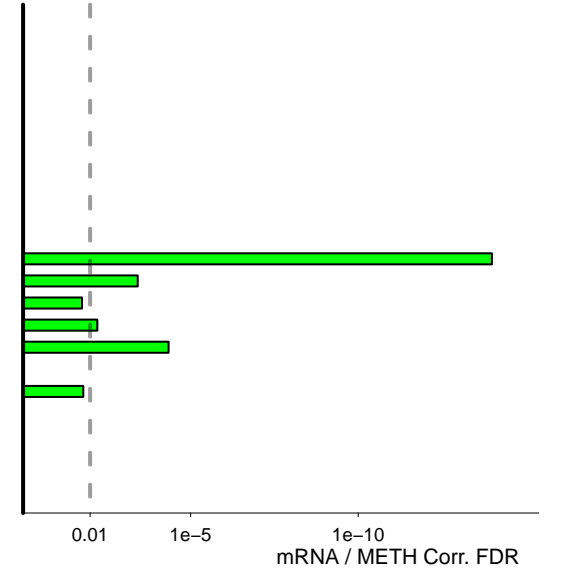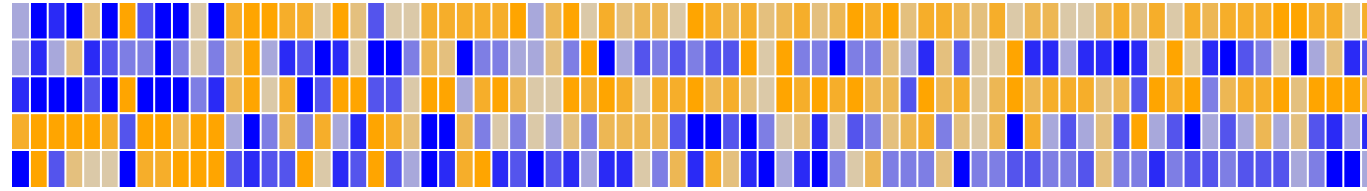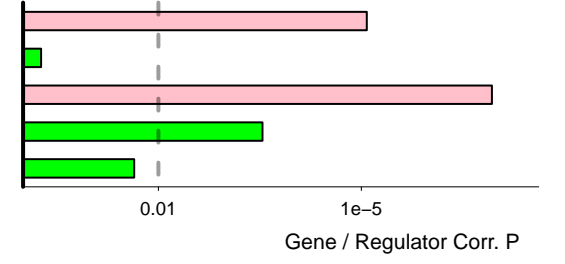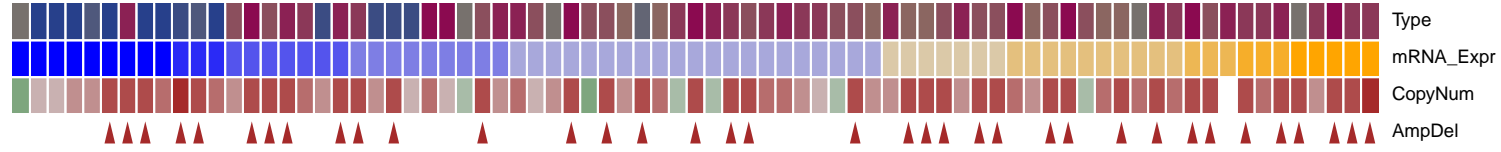

TCGA-EE-A20C-06  
TCGA-EE-A260-06  
TCGA-ER-A42K-06  
TCGA-D3-A105-06  
TCGA-ER-A19L-06  
TCGA-EE-A20H-06  
TCGA-ER-A3ES-06  
TCGA-LH-A90B-06  
TCGA-FS-A17C-06  
TCGA-EE-A2NM-06  
TCGA-WE-A82M-06  
TCGA-EE-A1X3-06  
TCGA-GN-A81L-06  
TCGA-YG-A33P-06  
TCGA-FS-A17Z-06  
TCGA-D3-A3ML-06  
TCGA-EE-A3J8-06  
TCGA-D9-A65G-06  
TCGA-EE-A29P-06  
TCGA-WE-A8K6-06  
TCGA-WE-A8ZQ-06  
TCGA-D3-A3M0-06  
TCGA-EE-A29L-06  
TCGA-GN-A4U7-06  
TCGA-D3-A86C-06  
TCGA-D3-A1Q1-06  
TCGA-GN-A268-06  
TCGA-EE-A2GR-06  
TCGA-D3-A8GV-06  
TCGA-EE-A3AH-06  
TCGA-D3-A86L-06  
TCGA-FS-A4F9-06  
TCGA-EE-A2A5-06  
TCGA-FS-A173-06  
TCGA-3N-A9WB-06  
TCGA-FS-A17G-06  
TCGA-EE-A29E-06  
TCGA-D3-A10A-06  
TCGA-EE-A17Z-06  
TCGA-D3-A86P-06  
TCGA-FS-A1ZY-06  
TCGA-D3-A56I-06  
TCGA-FS-A4F0-06  
TCGA-W3-A824-06  
TCGA-RP-A690-06  
TCGA-D9-A62C-06  
TCGA-EE-A180-06  
TCGA-FS-A4PE-06  
TCGA-FS-A17W-06  
TCGA-ER-A19F-06  
TCGA-GN-A262-06  
TCGA-FS-A1ZU-06  
TCGA-FS-A1ZE-06  
TCGA-DA-A1IA-06  
TCGA-FS-A4FB-06  
TCGA-FR-A7U8-06  
TCGA-D3-A86K-06  
TCGA-DA-A95W-06  
TCGA-WE-A8JZ-06  
TCGA-FS-A1ZJ-06  
TCGA-D3-A3C6-06  
TCGA-EE-A3AD-06  
TCGA-FR-A8YD-06  
TCGA-EE-A185-06  
TCGA-DA-A95Z-06  
TCGA-D3-A10A-07  
TCGA-FS-A1ZK-06  
TCGA-EE-A29D-06  
TCGA-D9-A476-06  
TCGA-FW-A3I3-06  
TCGA-RP-A695-06  
TCGA-GN-A8LK-06  
TCGA-W3-AA21-06  
TCGA-EE-A3JI-06



# C10ORF90

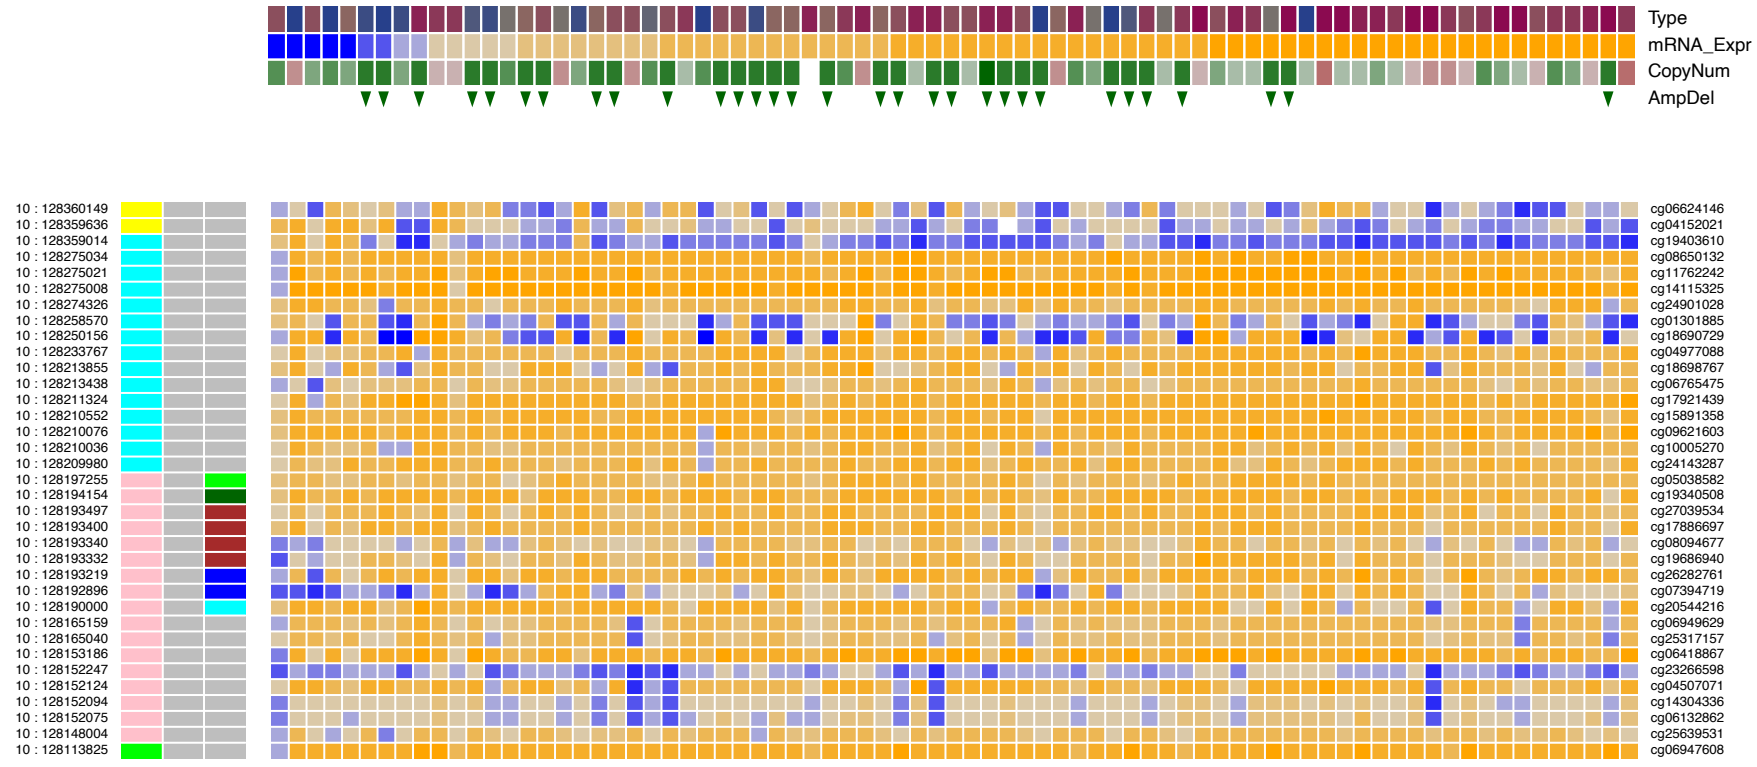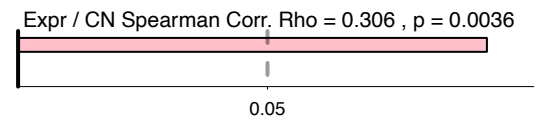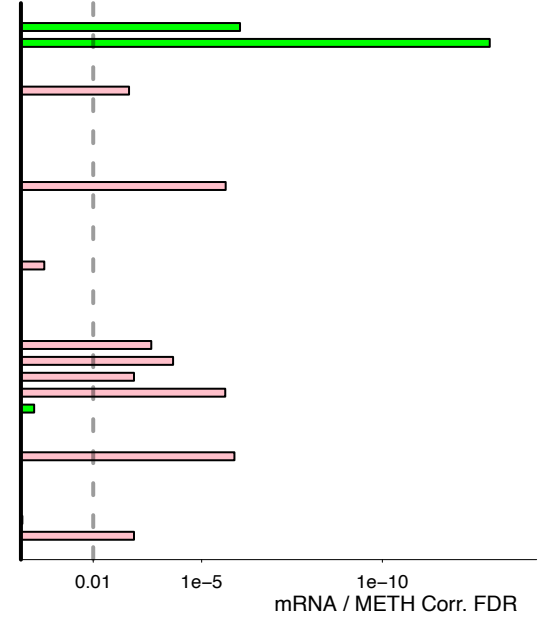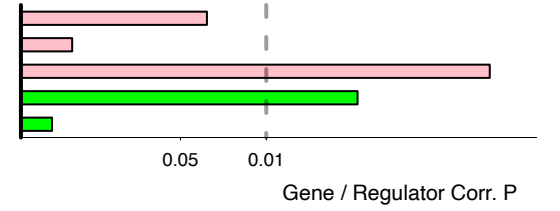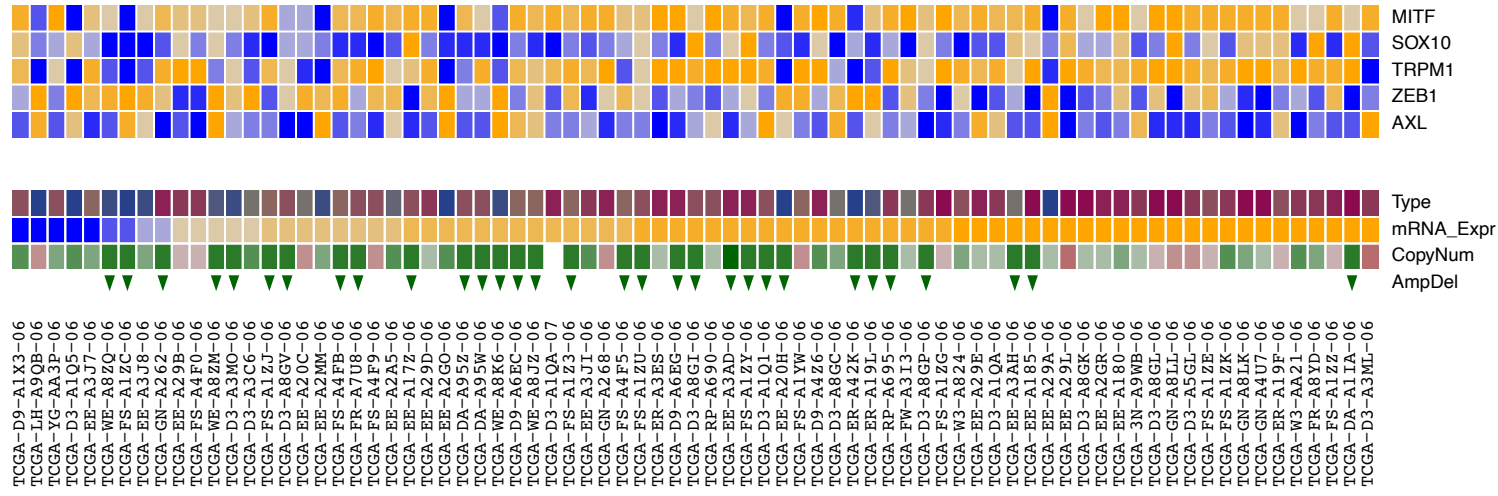

GeneLoc  
PromoterAssoc  
CpIsland

MITF  
SOX10  
TRPM1  
ZEB1  
AXL

Type  
mRNA\_Expr  
CopyNum  
AmpDel

TCGA-D9-A1X3-06  
TCGA-LH-A90B-06  
TCGA-YG-AA3P-06  
TCGA-D3-A105-06  
TCGA-EE-A3J7-06  
TCGA-WE-A8Z0-06  
TCGA-FS-A1ZC-06  
TCGA-EE-A3J8-06  
TCGA-GN-A262-06  
TCGA-EE-A29B-06  
TCGA-FS-A4F0-06  
TCGA-WE-A6ZM-06  
TCGA-D3-A3MO-06  
TCGA-FS-A1ZJ-06  
TCGA-D3-A8GV-06  
TCGA-EE-A20C-06  
TCGA-EE-A2MM-06  
TCGA-FS-A4FB-06  
TCGA-FR-A708-06  
TCGA-FS-A4F9-06  
TCGA-EE-A2A5-06  
TCGA-EE-A17Z-06  
TCGA-EE-A29D-06  
TCGA-EE-A2GO-06  
TCGA-DA-A95Z-06  
TCGA-DA-A95W-06  
TCGA-WE-A8K6-06  
TCGA-D9-A6EC-06  
TCGA-WE-A8JZ-06  
TCGA-D3-A1QA-07  
TCGA-FS-A1Z3-06  
TCGA-EE-A3JI-06  
TCGA-GN-A268-06  
TCGA-FS-A4F5-06  
TCGA-FS-A1ZU-06  
TCGA-ER-A3ES-06  
TCGA-D9-A6EG-06  
TCGA-D3-A8GI-06  
TCGA-RP-A690-06  
TCGA-EE-A3AD-06  
TCGA-FS-A1ZY-06  
TCGA-D3-A1O1-06  
TCGA-FS-A1YW-06  
TCGA-EE-A20H-06  
TCGA-FS-A4Z6-06  
TCGA-D3-A8Z6-06  
TCGA-D3-A8GC-06  
TCGA-ER-A4ZK-06  
TCGA-ER-A19L-06  
TCGA-RP-A695-06  
TCGA-FW-A3I3-06  
TCGA-D3-A8GP-06  
TCGA-FS-A1ZG-06  
TCGA-W3-A8Z4-06  
TCGA-EE-A29E-06  
TCGA-EE-A29E-06  
TCGA-D3-A1QA-06  
TCGA-EE-A3AH-06  
TCGA-EE-A185-06  
TCGA-EE-A29A-06  
TCGA-EE-A29L-06  
TCGA-D3-A8GK-06  
TCGA-EE-A2GR-06  
TCGA-EE-A180-06  
TCGA-3N-A9WB-06  
TCGA-D3-A8GL-06  
TCGA-GN-A8LL-06  
TCGA-D3-A5GL-06  
TCGA-FS-A1ZE-06  
TCGA-FS-A1ZK-06  
TCGA-GN-A8LK-06  
TCGA-GN-A4U7-06  
TCGA-ER-A19F-06  
TCGA-W3-AA21-06  
TCGA-FR-A8YD-06  
TCGA-FS-A1ZZ-06  
TCGA-DA-A1IA-06  
TCGA-D3-A3ML-06

# ZNF704

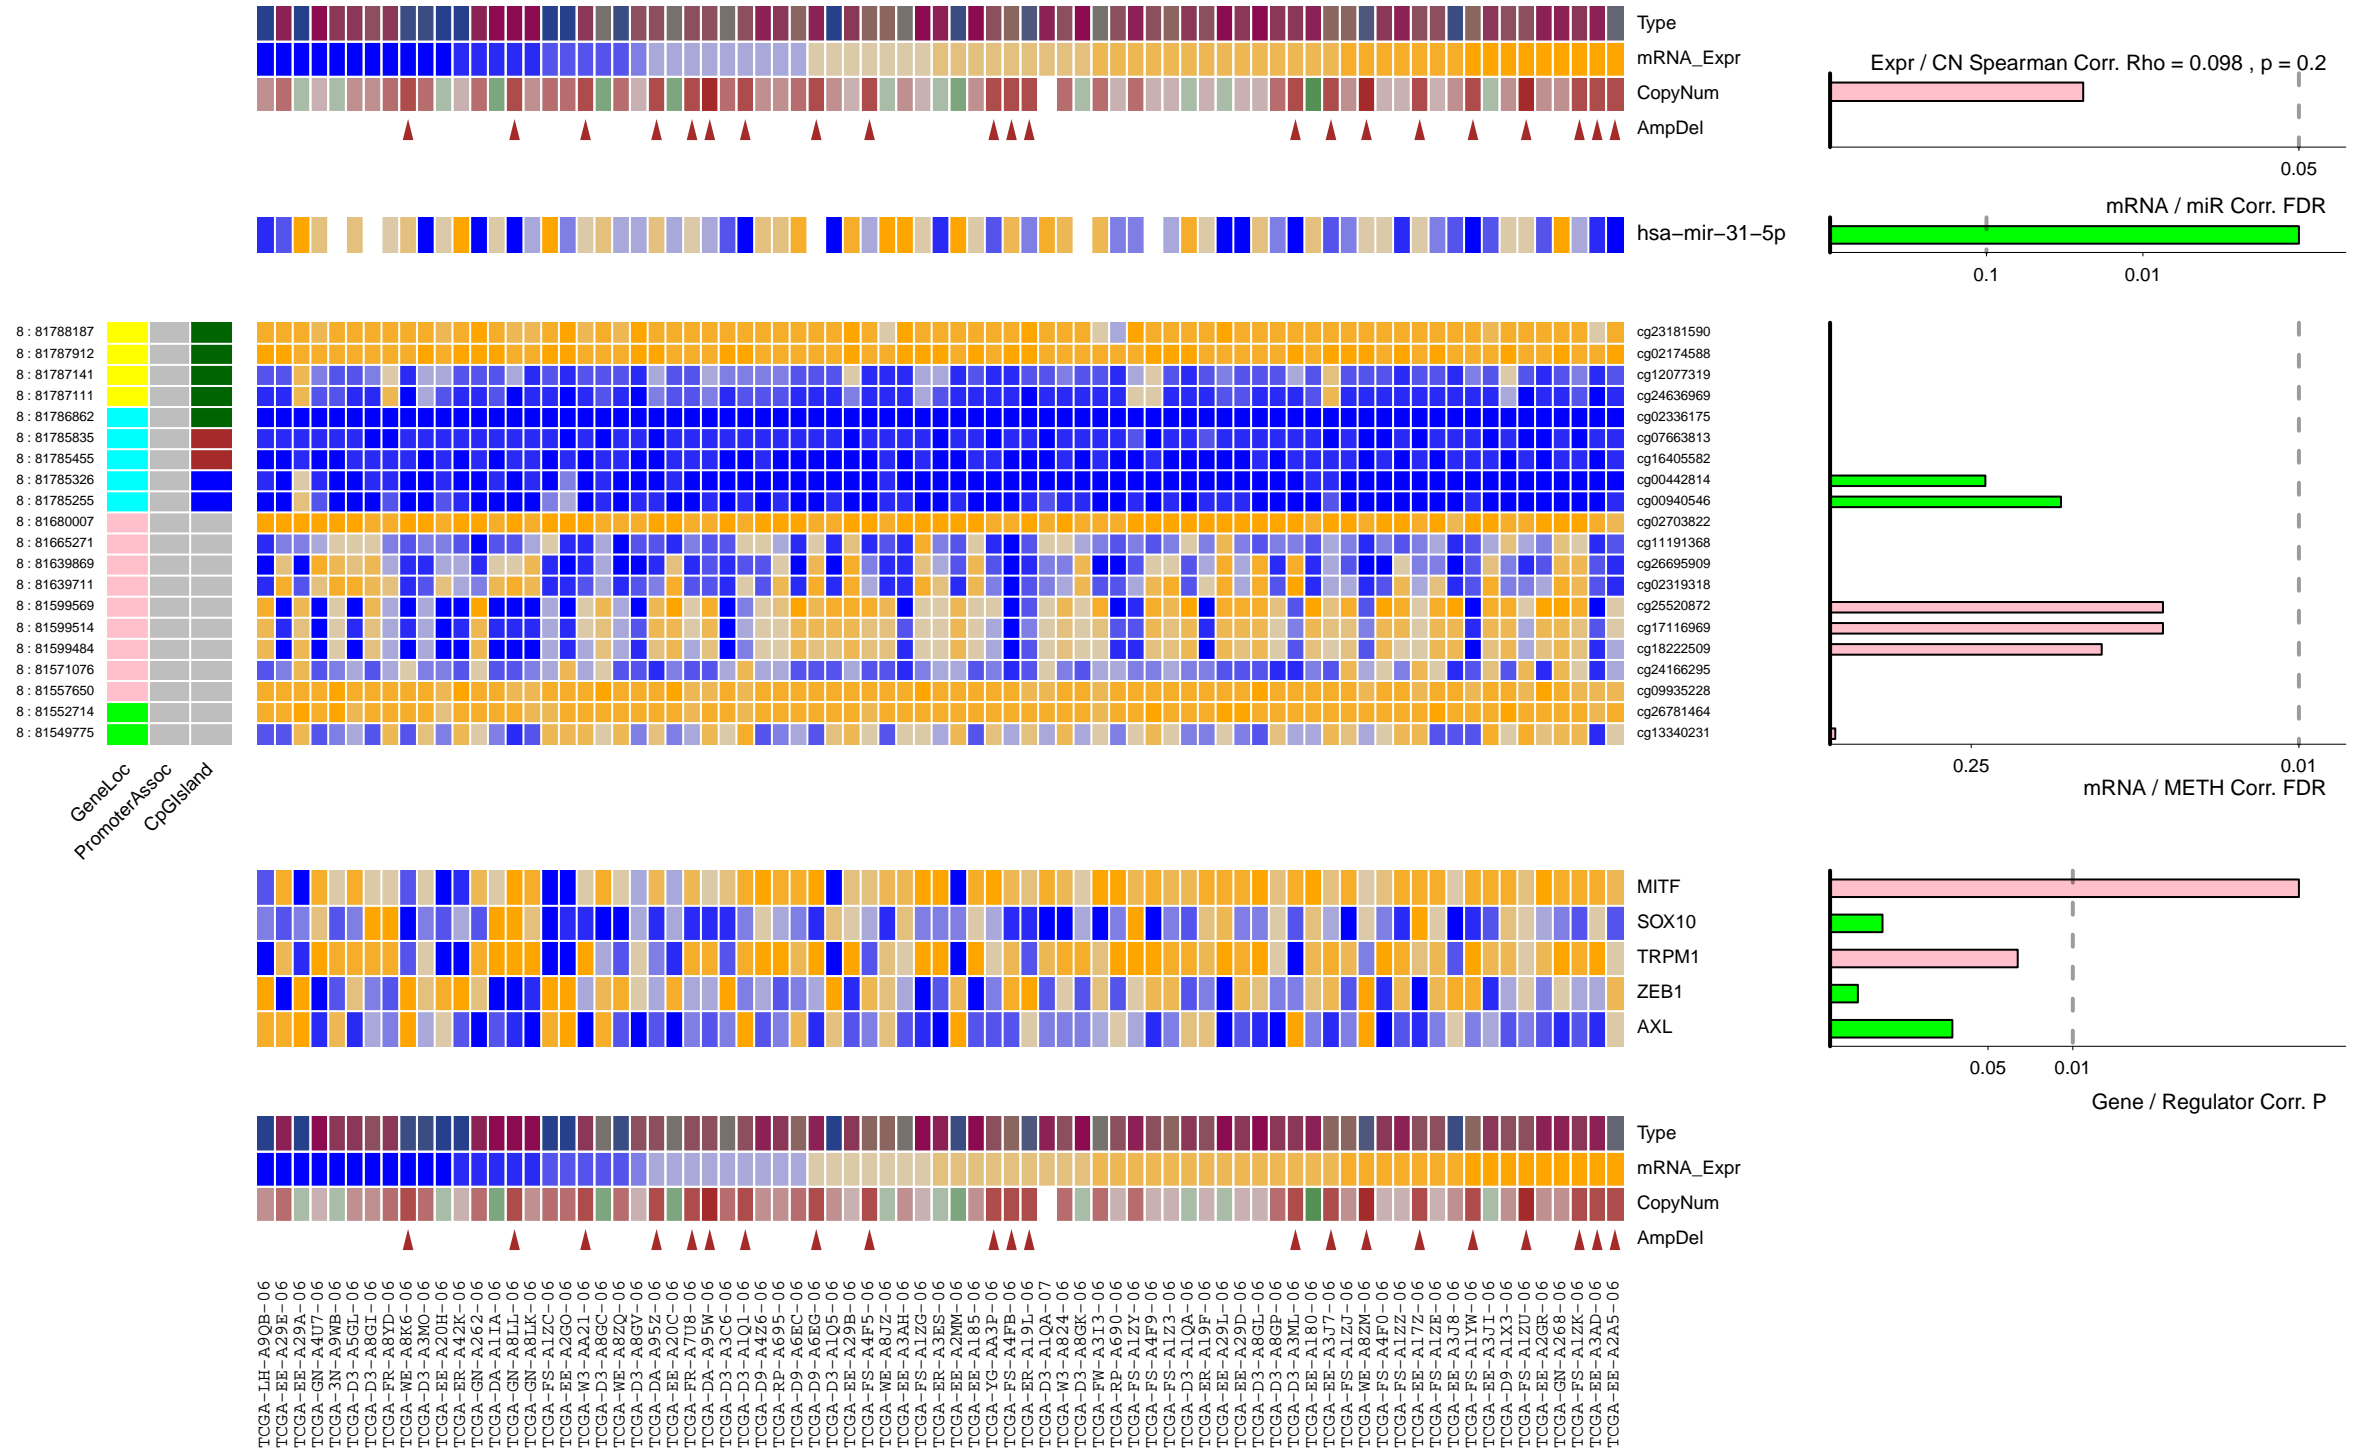

# CABLES1

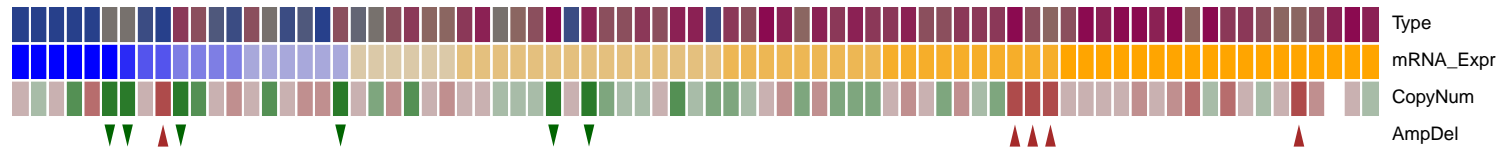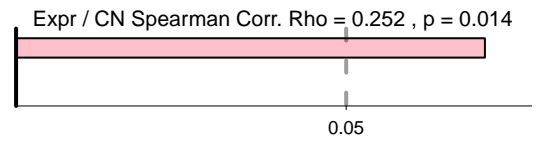

18 : 20713759  
 18 : 20714217  
 18 : 20714332  
 18 : 20714428  
 18 : 20714485  
 18 : 20714496  
 18 : 20715040  
 18 : 20715348  
 18 : 20715404  
 18 : 20715409  
 18 : 20716435  
 18 : 20716451  
 18 : 20716545  
 18 : 20716991  
 18 : 20717411  
 18 : 20717693  
 18 : 20718301  
 18 : 20735005  
 18 : 20735119  
 18 : 20735537  
 18 : 20735648  
 18 : 20735672  
 18 : 20735934  
 18 : 20811408  
 18 : 20839953

GeneLoc  
 PromoterAssoc  
 CpGIsland

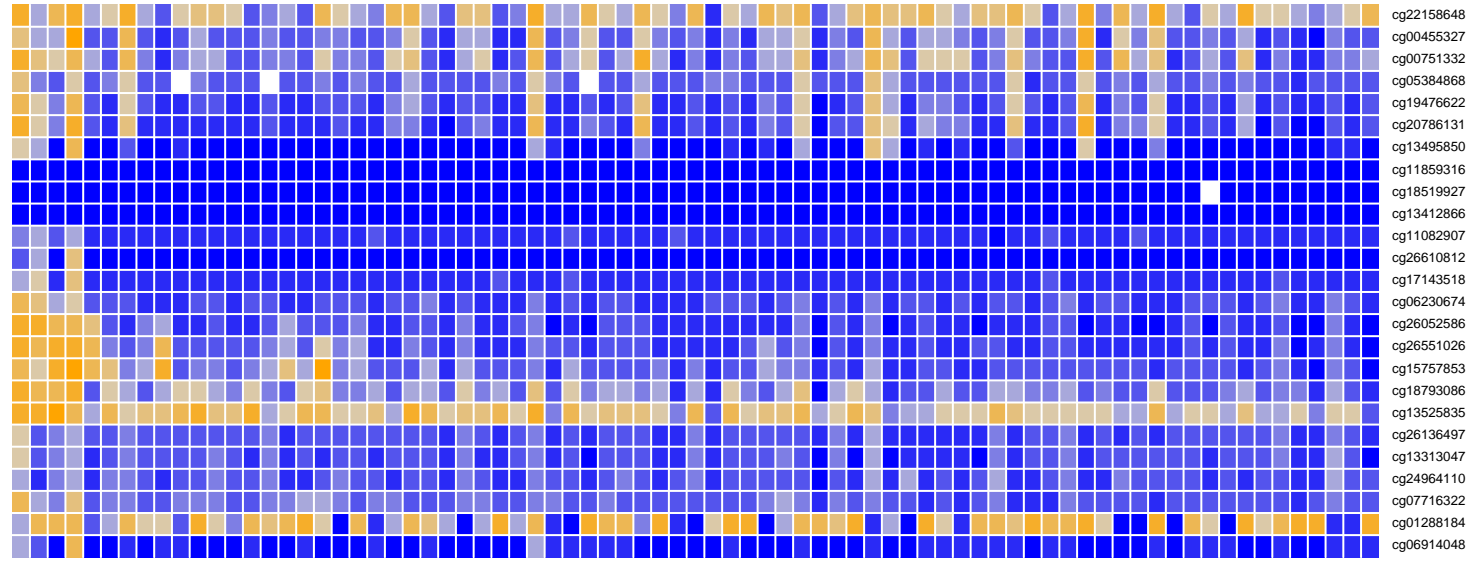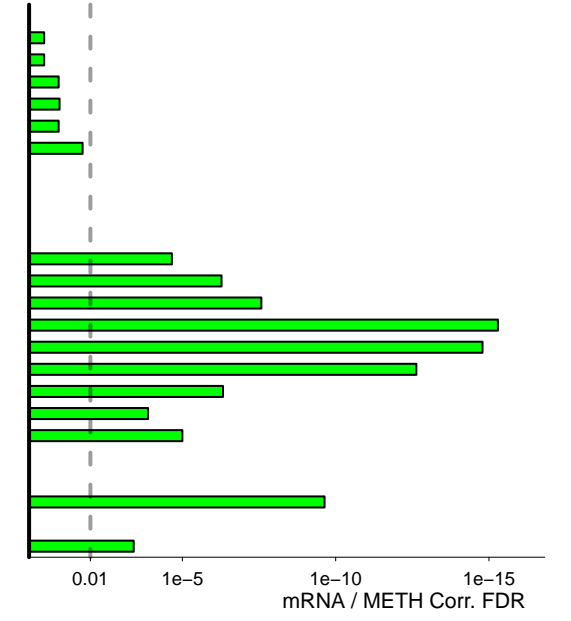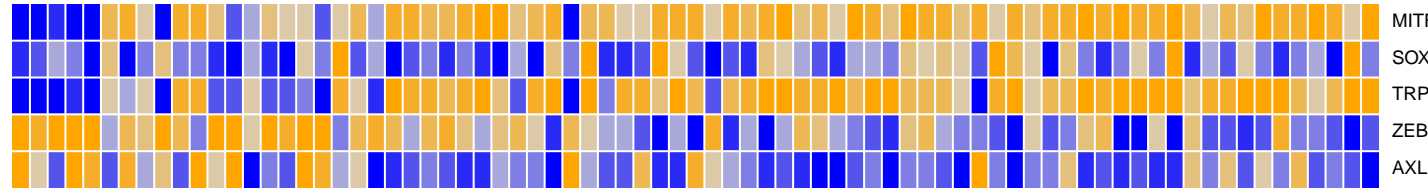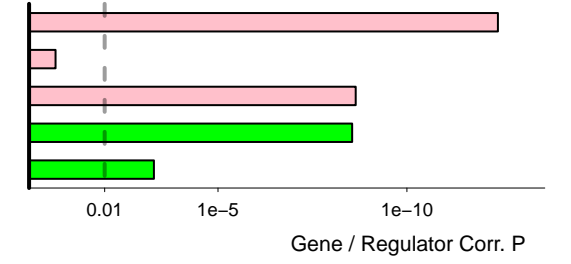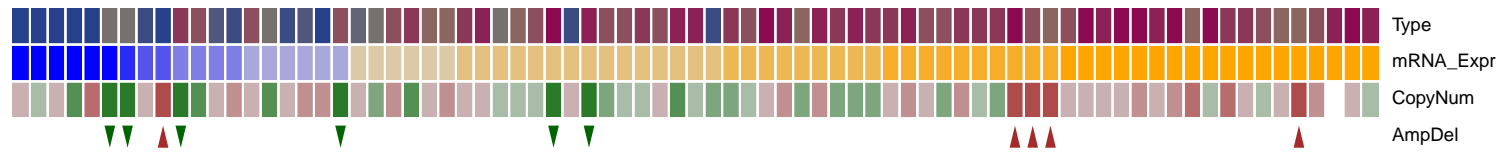

TCGA-EE-A2G0-06  
 TCGA-EE-A20H-06  
 TCGA-ER-A42K-06  
 TCGA-EE-A29A-06  
 TCGA-FS-A1ZC-06  
 TCGA-EE-A3AH-06  
 TCGA-D3-A8GC-06  
 TCGA-D3-A3MO-06  
 TCGA-D3-A1O5-06  
 TCGA-EE-A29D-06  
 TCGA-D3-A1Q1-06  
 TCGA-ER-A191-06  
 TCGA-WE-A8K6-06  
 TCGA-D3-A8CV-06  
 TCGA-D3-A3C6-06  
 TCGA-WE-A8Z0-06  
 TCGA-WE-A8ZM-06  
 TCGA-LI-A9QB-06  
 TCGA-D3-A6GI-06  
 TCGA-EE-AZAS-06  
 TCGA-EE-AZ0C-06  
 TCGA-FS-A4F9-06  
 TCGA-FS-A1ZK-06  
 TCGA-FS-A1Z3-06  
 TCGA-FS-A4FB-06  
 TCGA-D3-A5GL-06  
 TCGA-D9-A6EG-06  
 TCGA-FW-A313-06  
 TCGA-FS-A4F5-06  
 TCGA-W3-A824-06  
 TCGA-GN-A8LK-06  
 TCGA-EE-A2MM-06  
 TCGA-FS-A1ZY-06  
 TCGA-DA-A95Z-06  
 TCGA-DA-A95W-06  
 TCGA-3N-A9WB-06  
 TCGA-EE-A17Z-06  
 TCGA-EE-A3AD-06  
 TCGA-EE-A29E-06  
 TCGA-EE-A3J8-06  
 TCGA-EE-A3J1-06  
 TCGA-FR-A7U8-06  
 TCGA-GN-A4U7-06  
 TCGA-D9-A4Z6-06  
 TCGA-EE-A3J7-06  
 TCGA-GN-A262-06  
 TCGA-W3-A821-06  
 TCGA-EE-A2GR-06  
 TCGA-EP-A695-06  
 TCGA-FS-A8F0-06  
 TCGA-EE-A180-06  
 TCGA-FS-A1ZE-06  
 TCGA-D9-A1X3-06  
 TCGA-D3-A6GP-06  
 TCGA-D3-A3ML-06  
 TCGA-FR-A8YD-06  
 TCGA-EE-A29L-06  
 TCGA-FS-A1ZU-06  
 TCGA-FS-A1ZJ-06  
 TCGA-ER-A19F-06  
 TCGA-D3-A8GL-06  
 TCGA-FS-A1ZZ-06  
 TCGA-EE-A185-06  
 TCGA-GN-A268-06  
 TCGA-GN-A8LL-06  
 TCGA-WE-A8JZ-06  
 TCGA-D3-A8GK-06  
 TCGA-EE-A29B-06  
 TCGA-EP-A690-06  
 TCGA-FS-A1YW-06  
 TCGA-D9-A6EC-06  
 TCGA-YG-AA3P-06  
 TCGA-D3-A1QA-07  
 TCGA-DA-A1IA-06  
 TCGA-ER-A3ES-06

# TRPM1

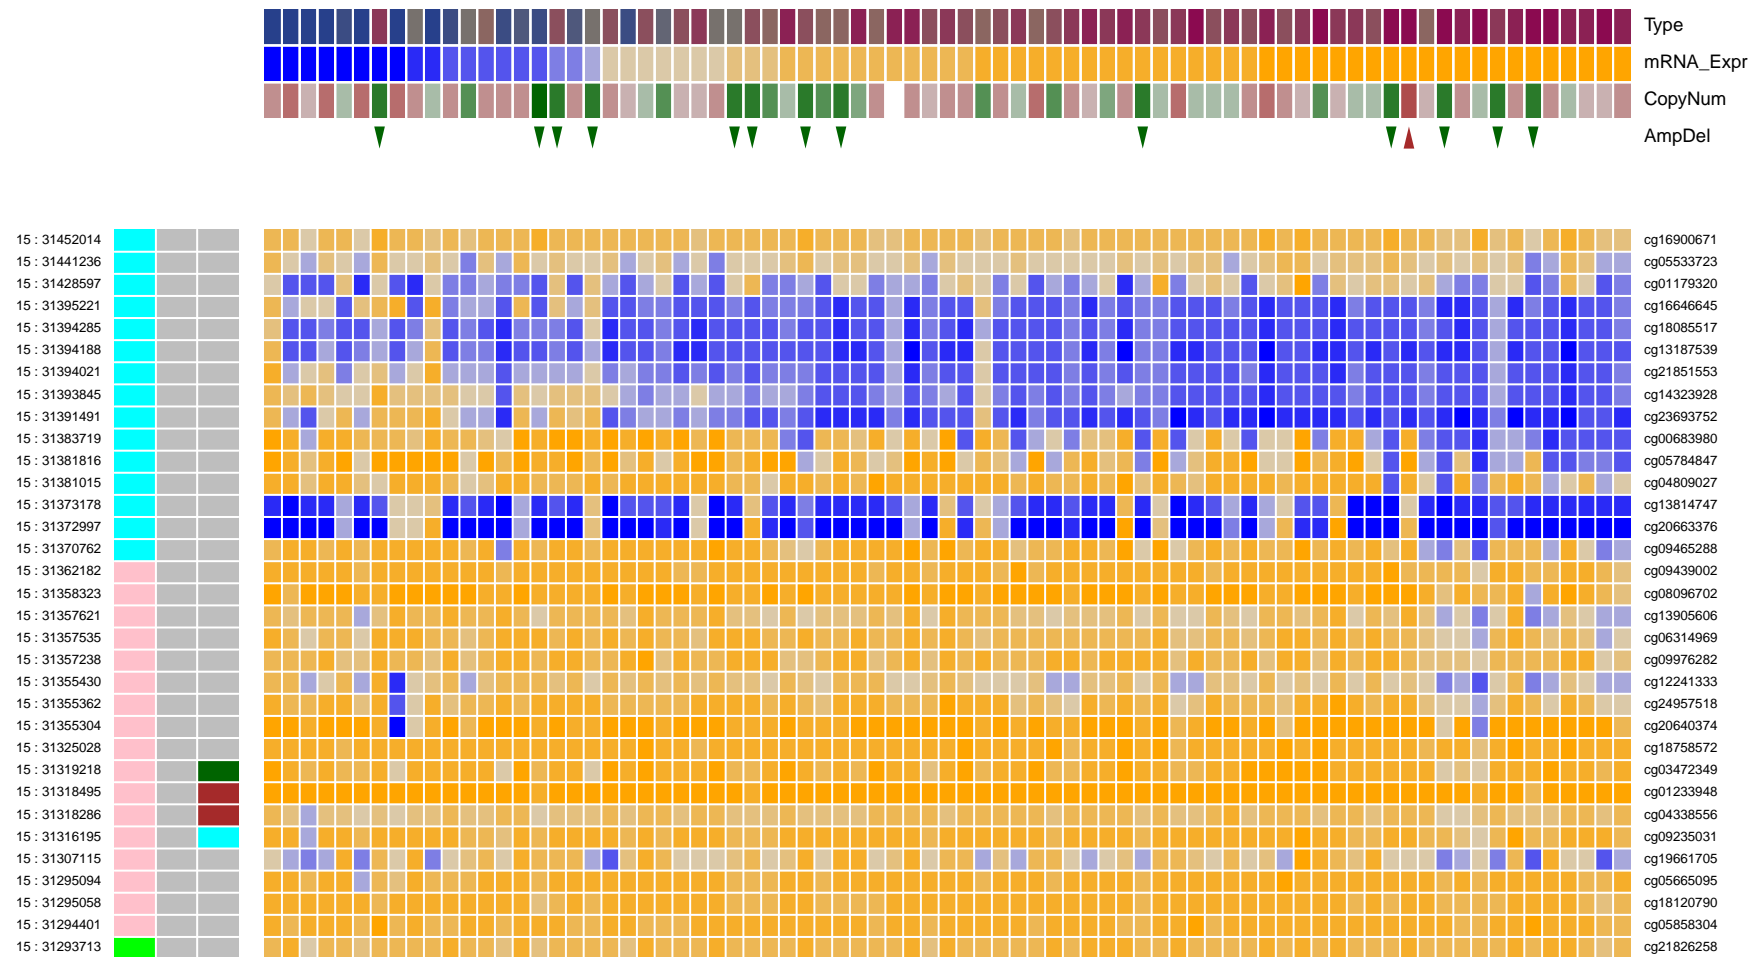

GeneLoc  
 PromoterAssoc  
 CpGIsland

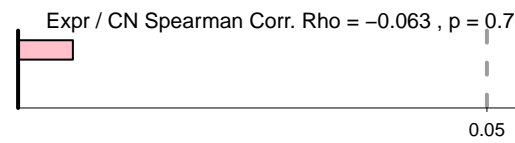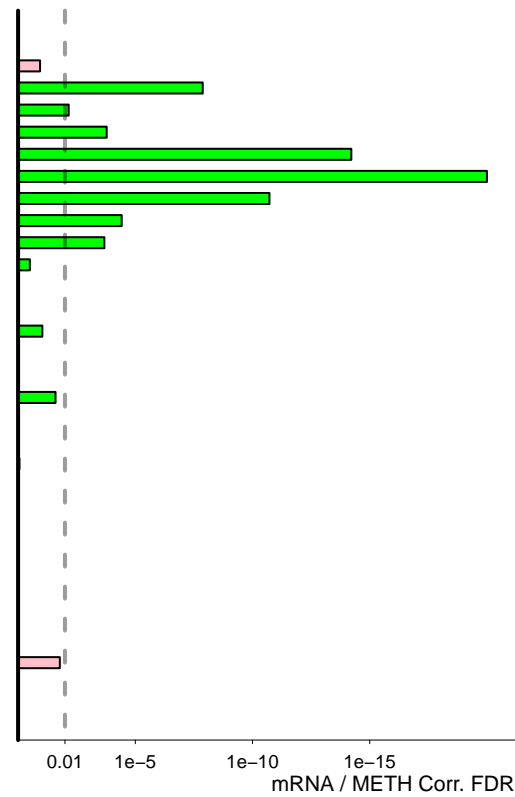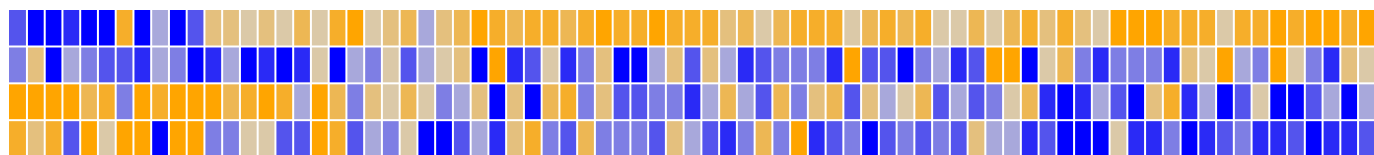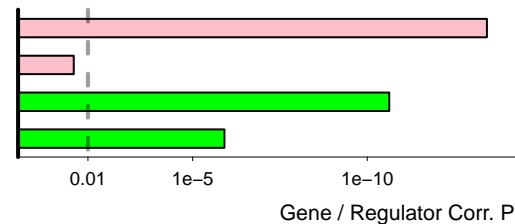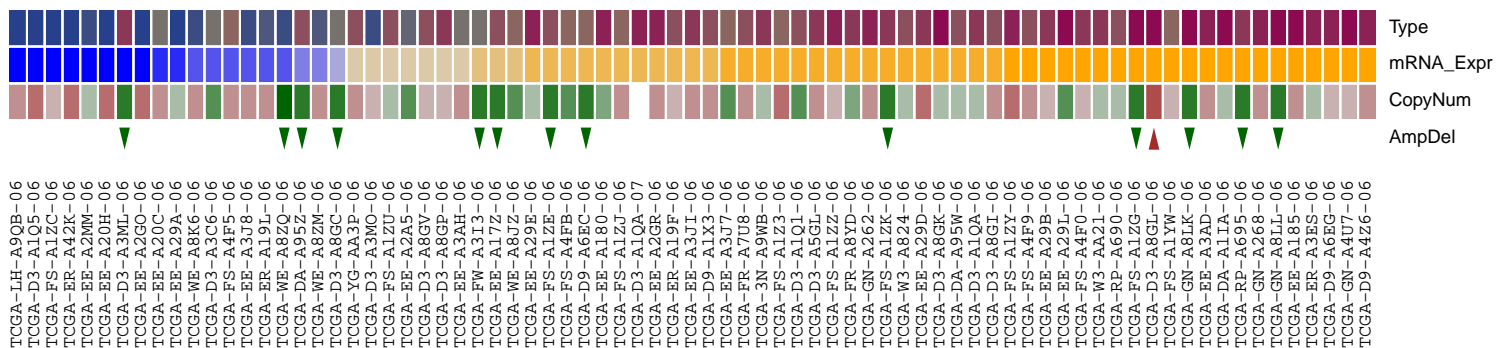

# WDR91

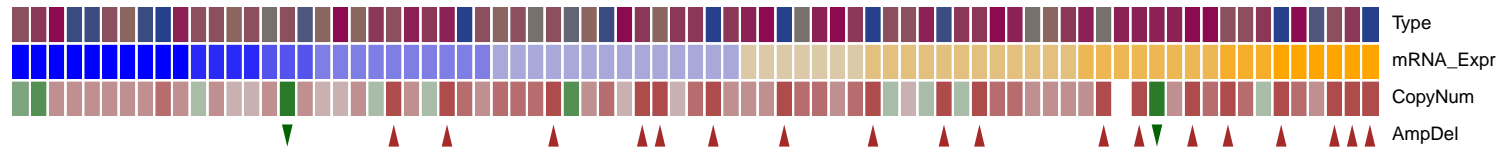

7: 134896791  
 7: 134896663  
 7: 134896608  
 7: 134896435  
 7: 134896357  
 7: 134896347  
 7: 134896293  
 7: 134896227  
 7: 134896097  
 7: 134895782  
 7: 134889789  
 7: 134885498  
 7: 134879060  
 7: 134870726

GeneLoc  
 PromoterAssoc  
 CpGIsland

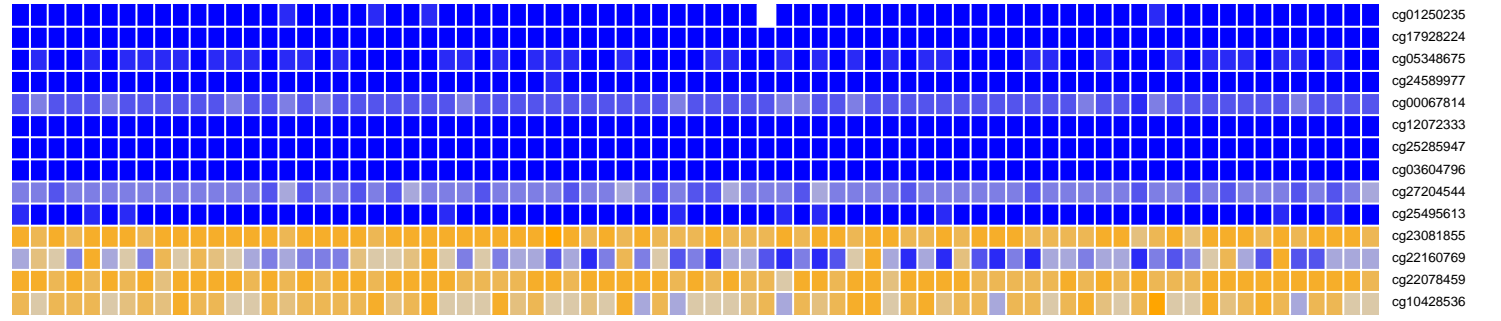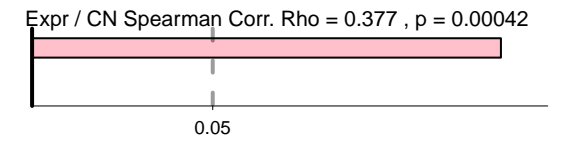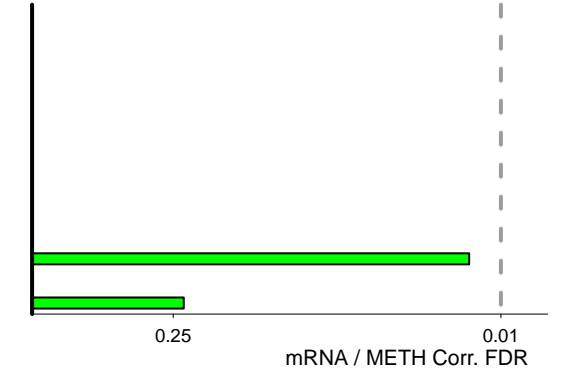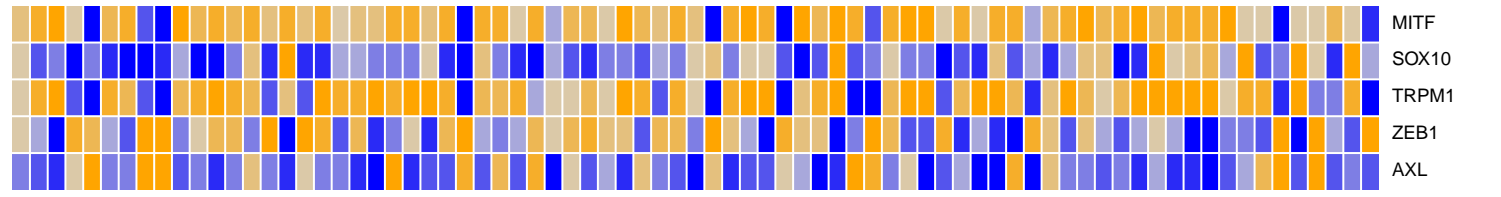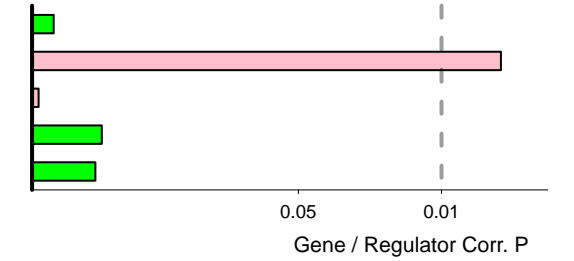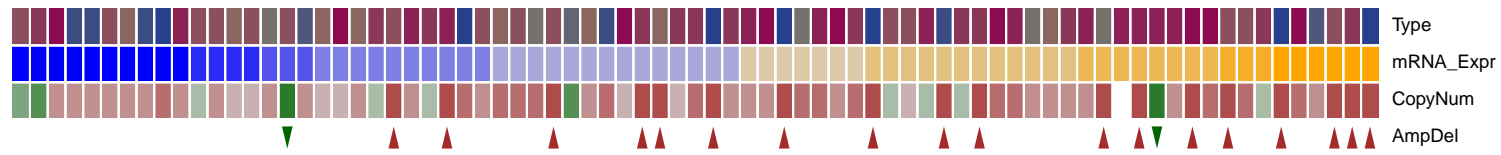

TCGA-FS-A1ZU-06  
 TCGA-FS-A1ZK-06  
 TCGA-FS-A1ZG-06  
 TCGA-EE-A3J8-06  
 TCGA-EE-A2MM-06  
 TCGA-FR-A7U8-06  
 TCGA-FS-A1ZJ-06  
 TCGA-WE-ABK6-06  
 TCGA-EE-A2GO-06  
 TCGA-EE-A2GR-06  
 TCGA-W3-AB24-06  
 TCGA-FS-A8F9-06  
 TCGA-FS-A1Z3-06  
 TCGA-ER-A19F-06  
 TCGA-D3-A3C6-06  
 TCGA-EE-A17Z-06  
 TCGA-ER-A19L-06  
 TCGA-FS-A1YK-06  
 TCGA-D3-ABGK-06  
 TCGA-EE-A3U7-06  
 TCGA-FS-A4F0-06  
 TCGA-D3-A1Q1-06  
 TCGA-GN-A268-06  
 TCGA-EE-A29B-06  
 TCGA-FS-A1ZZ-06  
 TCGA-FS-A1ZC-06  
 TCGA-D9-A1X3-06  
 TCGA-D9-A6FC-06  
 TCGA-DA-A95W-06  
 TCGA-D3-ABGC-06  
 TCGA-EE-A2A5-06  
 TCGA-FS-A4FB-06  
 TCGA-D3-A3MO-06  
 TCGA-D3-ABGL-06  
 TCGA-D3-A1QA-06  
 TCGA-FS-A4F5-06  
 TCGA-EE-A29D-06  
 TCGA-D3-ABGP-06  
 TCGA-D3-A1O5-06  
 TCGA-D9-A4Z6-06  
 TCGA-EE-A185-06  
 TCGA-EE-A20H-06  
 TCGA-FW-A3T3-06  
 TCGA-GN-A262-06  
 TCGA-GN-ABLL-06  
 TCGA-D3-A3ML-06  
 TCGA-IH-A9QB-06  
 TCGA-FS-A1ZE-06  
 TCGA-ER-A490-06  
 TCGA-ER-A3ES-06  
 TCGA-WE-ABZQ-06  
 TCGA-EE-A3J1-06  
 TCGA-W3-AB21-06  
 TCGA-GN-ABLK-06  
 TCGA-EE-A29E-06  
 TCGA-EE-A20C-06  
 TCGA-WE-ABUJ-06  
 TCGA-EE-A180-06  
 TCGA-EE-A3AH-06  
 TCGA-D3-A1QA-07  
 TCGA-D9-A6EG-06  
 TCGA-FS-A1ZY-06  
 TCGA-EE-A3AD-06  
 TCGA-GN-A4U7-06  
 TCGA-EE-A29L-06  
 TCGA-YG-AA3P-06  
 TCGA-D3-ABGI-06  
 TCGA-3N-A9WB-06  
 TCGA-EE-A29A-06  
 TCGA-DA-A1IA-06  
 TCGA-WE-ABZM-06  
 TCGA-DA-A95Z-06  
 TCGA-FR-ABYD-06  
 TCGA-ER-A4ZK-06

# SLC1A4

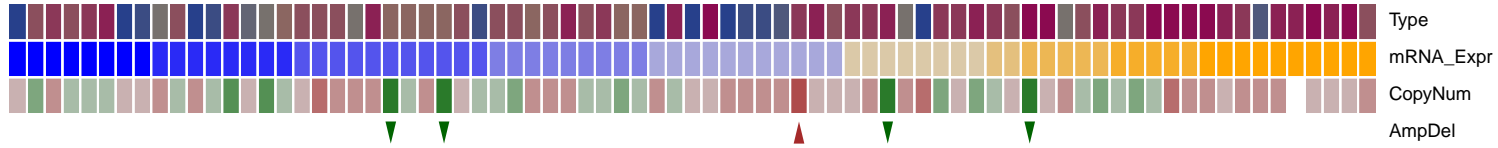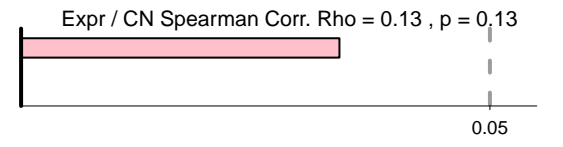

2 : 65214625  
2 : 65215361  
2 : 65215363  
2 : 65215434  
2 : 65215452  
2 : 65215461  
2 : 65215472  
2 : 65215494  
2 : 65215566  
2 : 65215638  
2 : 65215753  
2 : 65216118  
2 : 65216295  
2 : 65216516  
2 : 65216679  
2 : 65217211  
2 : 65217528  
2 : 65217568  
2 : 65217623  
2 : 65219239  
2 : 65220148  
2 : 65225988  
2 : 65240880  
2 : 65250623

GeneLoc  
PromoterAssoc  
CpGIsland

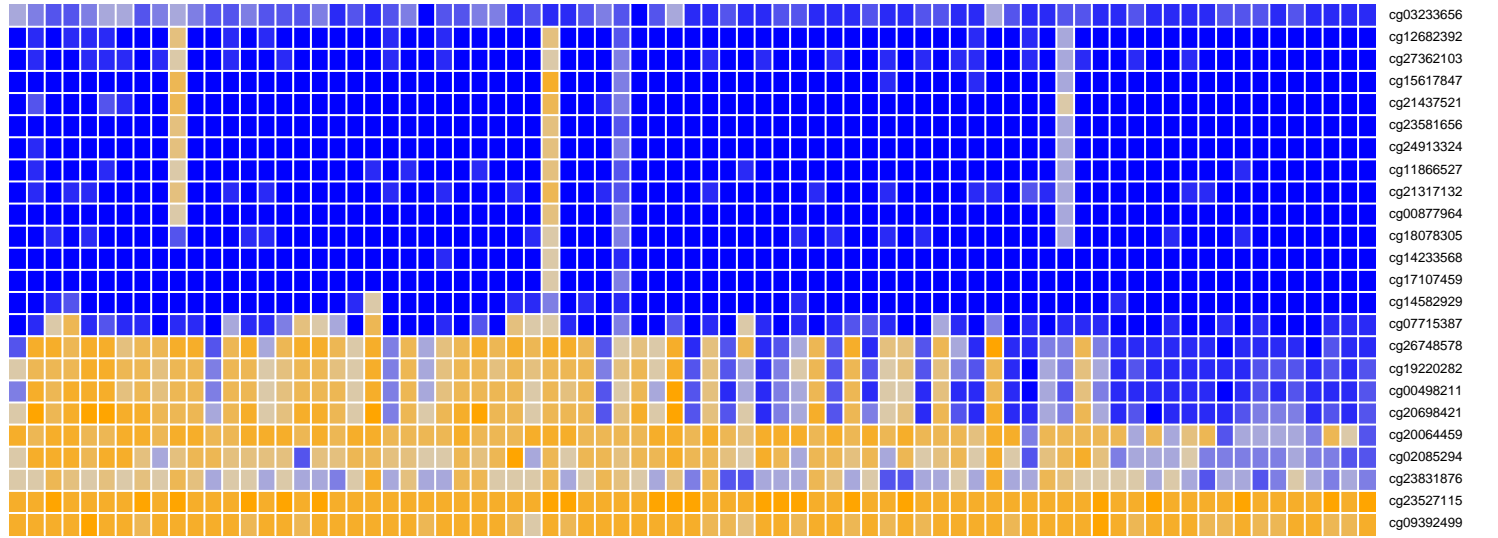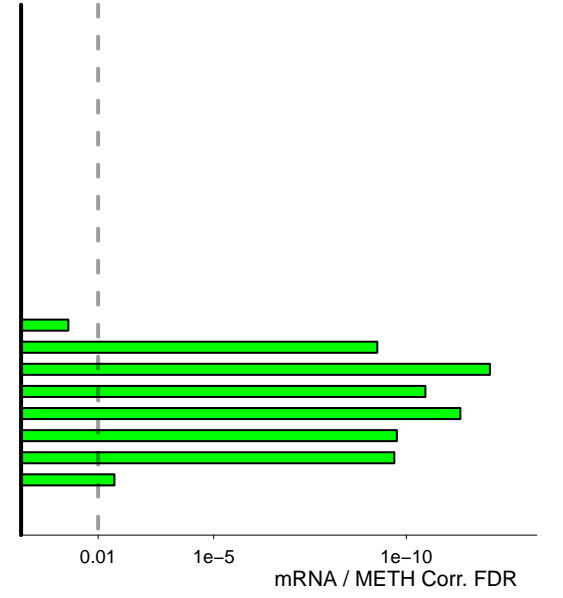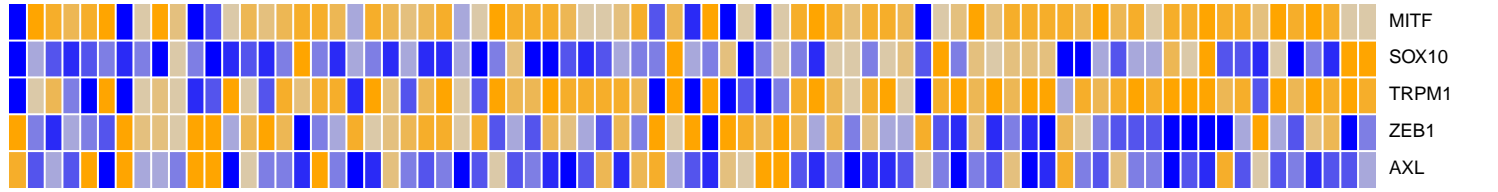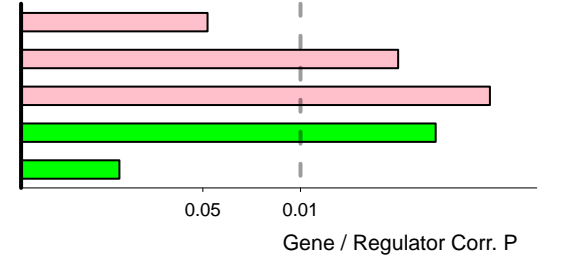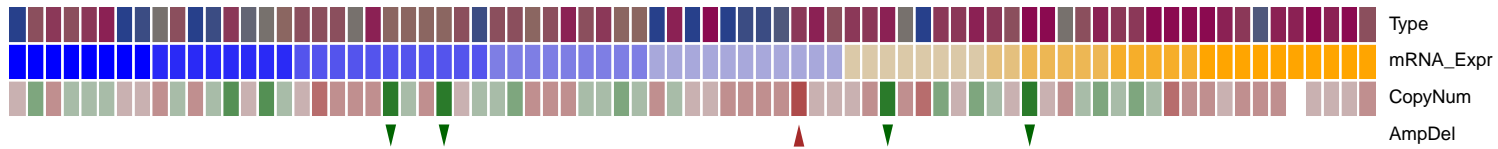

TCGA-FS-A1ZC-06  
TCGA-YG-AA3P-06  
TCGA-EE-A3JI-06  
TCGA-DA-A95Z-06  
TCGA-D3-A3ML-06  
TCGA-ER-A3ES-06  
TCGA-EE-A2GO-06  
TCGA-D3-A3MO-06  
TCGA-FW-A3I3-06  
TCGA-FS-A1ZU-06  
TCGA-EE-A29A-06  
TCGA-WE-A8K6-06  
TCGA-W3-A2A1-06  
TCGA-EE-A2A5-06  
TCGA-D3-A9C6-06  
TCGA-FS-A1Z3-06  
TCGA-EE-A1Z7-06  
TCGA-D3-A1O1-06  
TCGA-FR-A1O8-06  
TCGA-EE-A2OC-06  
TCGA-GN-A268-06  
TCGA-WE-A6JZ-06  
TCGA-FS-A4FS-06  
TCGA-FS-A4FB-06  
TCGA-FS-A1YW-06  
TCGA-D3-A8GV-06  
TCGA-WE-A8ZQ-06  
TCGA-RP-A690-06  
TCGA-D9-A1X3-06  
TCGA-FS-A1ZJ-06  
TCGA-FS-A4F9-06  
TCGA-GN-A262-06  
TCGA-DA-A95W-06  
TCGA-3N-A9WB-06  
TCGA-EE-A3J7-06  
TCGA-D9-A6EC-06  
TCGA-LH-A9QB-06  
TCGA-FS-A1ZY-06  
TCGA-ER-A4ZK-06  
TCGA-FS-A1ZG-06  
TCGA-D3-A1Q5-06  
TCGA-EE-A3T8-06  
TCGA-EE-A2MM-06  
TCGA-WE-A8ZM-06  
TCGA-EE-A29D-06  
TCGA-D9-A6EG-06  
TCGA-FS-A1ZE-06  
TCGA-D3-A8GP-06  
TCGA-D3-A6GL-06  
TCGA-EE-A3AD-06  
TCGA-EE-A3AH-06  
TCGA-EE-A2OH-06  
TCGA-FR-A6ID-06  
TCGA-FS-A4FU-06  
TCGA-EE-A180-06  
TCGA-EE-A29B-06  
TCGA-ER-A19F-06  
TCGA-GN-A8LK-06  
TCGA-GN-A4U7-06  
TCGA-D3-A8GC-06  
TCGA-W3-A824-06  
TCGA-EE-A2GR-06  
TCGA-D3-A1QA-06  
TCGA-RP-A695-06  
TCGA-D3-A8GK-06  
TCGA-EE-A29L-06  
TCGA-EE-A185-06  
TCGA-GN-A8LL-06  
TCGA-EE-A29E-06  
TCGA-FS-A1ZK-06  
TCGA-ER-A19L-06  
TCGA-D9-A4Z6-06  
TCGA-D3-A1QA-07  
TCGA-D3-A8GL-06  
TCGA-FS-A1ZZ-06  
TCGA-DA-A1IA-06  
TCGA-D3-A8GI-06

# RAB27A

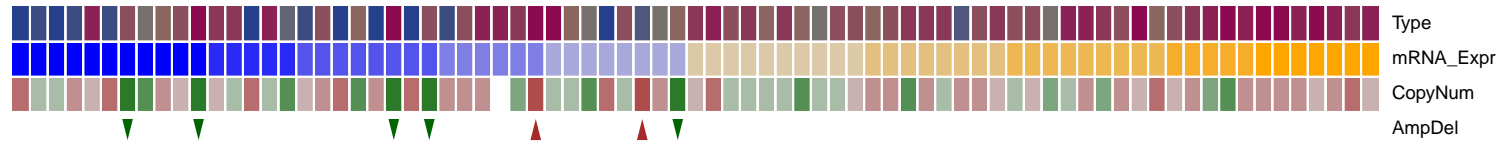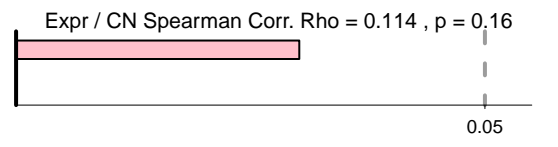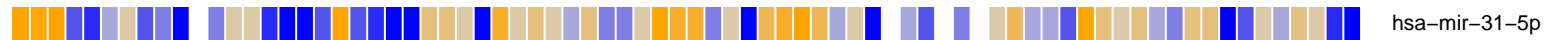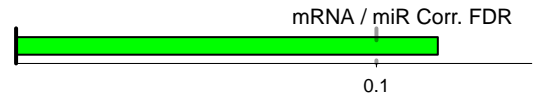

15 : 55611607  
 15 : 55611424  
 15 : 55611321  
 15 : 55611305  
 15 : 55611214  
 15 : 55611099  
 15 : 55610624  
 15 : 55585235  
 15 : 55583094  
 15 : 55582890  
 15 : 55582808  
 15 : 55582570  
 15 : 55582494  
 15 : 55582394  
 15 : 55582248  
 15 : 55582165  
 15 : 55582159  
 15 : 55581976  
 15 : 55581420  
 15 : 55574912  
 15 : 55564203  
 15 : 55563985  
 15 : 55562773  
 15 : 55562699  
 15 : 55562403  
 15 : 55559759  
 15 : 55543264  
 15 : 55513621  
 15 : 55510003

GeneLoc  
 PromoterAssoc  
 CpGIsland

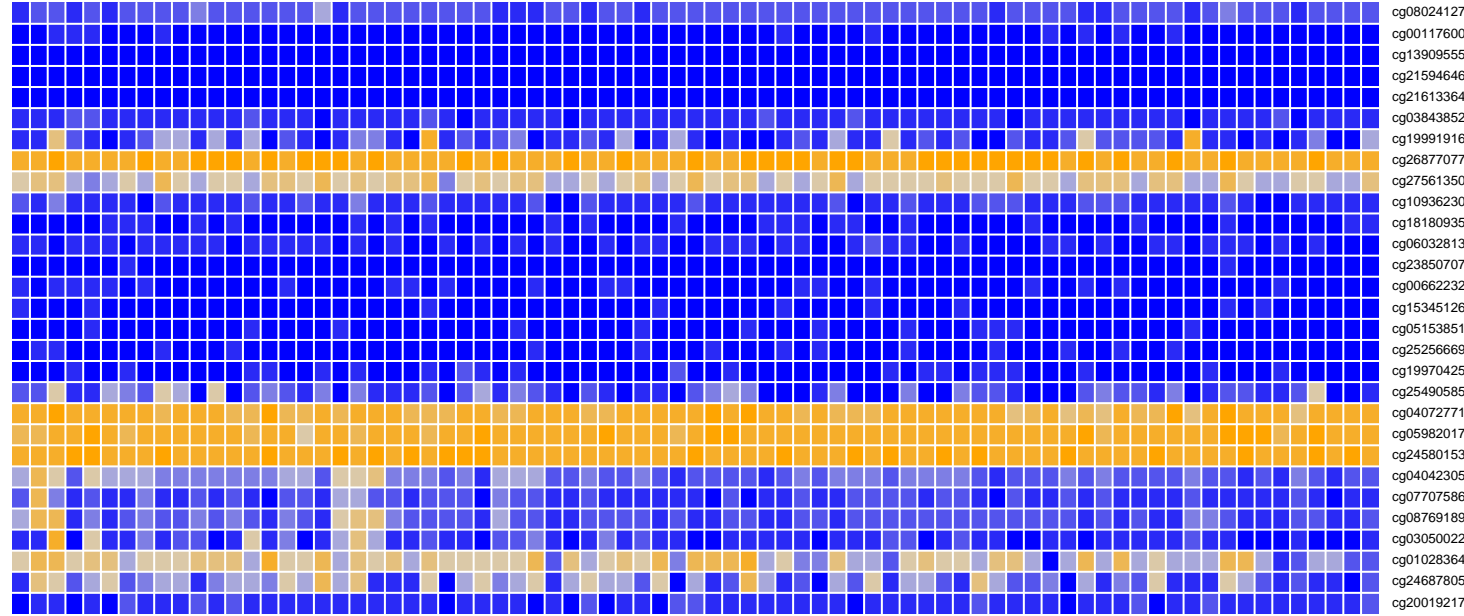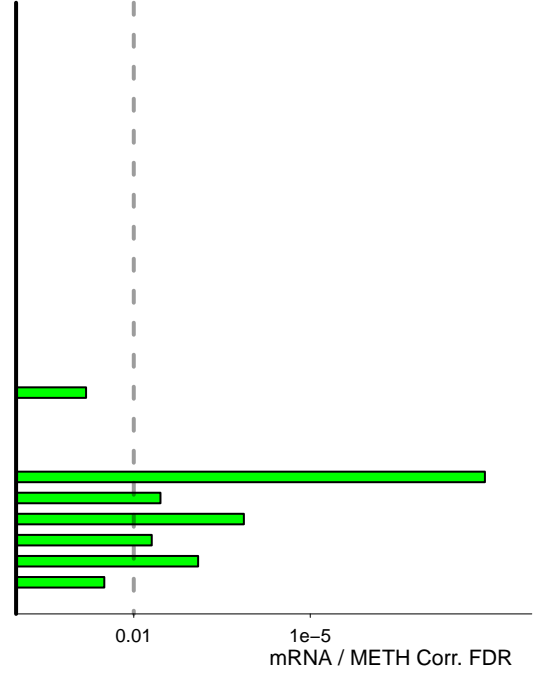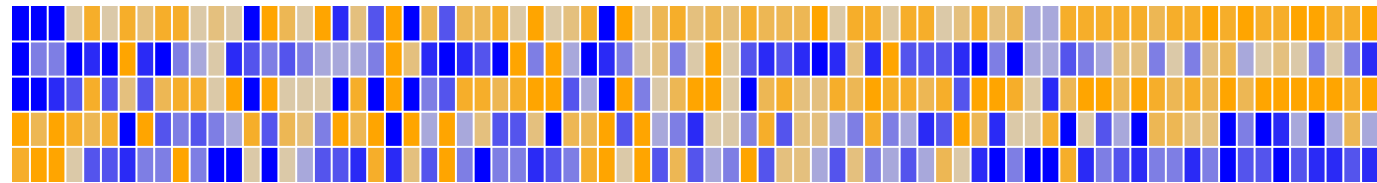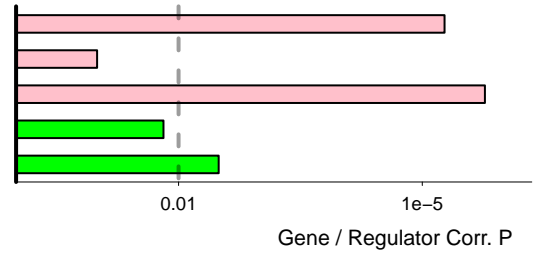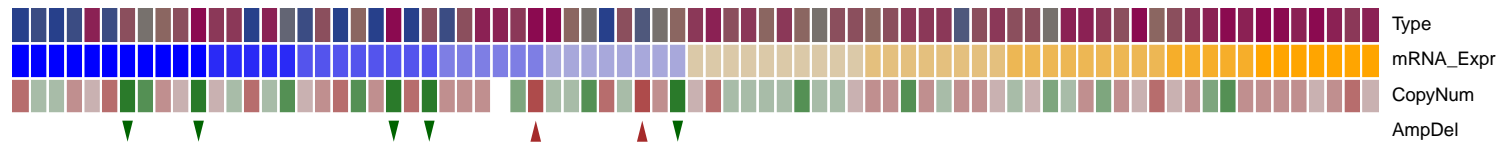

TCGA-FS-A1ZC-06  
 TCGA-EE-A2MM-06  
 TCGA-EE-A29A-06  
 TCGA-EE-A3J8-06  
 TCGA-FS-A1ZZ-06  
 TCGA-WE-A8ZQ-06  
 TCGA-EE-A17Z-06  
 TCGA-D3-A3C6-06  
 TCGA-FS-A1ZT-06  
 TCGA-D3-A1O1-06  
 TCGA-D3-A86K-06  
 TCGA-D3-A8GP-06  
 TCGA-W3-AA21-06  
 TCGA-EE-A20H-06  
 TCGA-FR-A3FS-06  
 TCGA-FE-A2F5-06  
 TCGA-D3-A3MO-06  
 TCGA-YG-AA3D-06  
 TCGA-ER-A4ZK-06  
 TCGA-EE-A3J7-06  
 TCGA-LH-A90B-06  
 TCGA-GN-A8LL-06  
 TCGA-D3-A1O5-06  
 TCGA-DA-A95Z-06  
 TCGA-WE-A8K6-06  
 TCGA-FR-A7U8-06  
 TCGA-GN-A26Z-06  
 TCGA-D3-A1QA-07  
 TCGA-FR-A8YD-06  
 TCGA-D3-A8GL-06  
 TCGA-DA-A1IA-06  
 TCGA-FS-A4F5-06  
 TCGA-D3-A8GC-06  
 TCGA-EE-A2G0-06  
 TCGA-RP-A690-06  
 TCGA-WE-A8ZM-06  
 TCGA-EE-A3AH-06  
 TCGA-D9-A6EC-06  
 TCGA-EE-A29B-06  
 TCGA-FS-A1ZY-06  
 TCGA-FS-A1ZU-06  
 TCGA-D3-A3ML-06  
 TCGA-FS-A4FB-06  
 TCGA-D3-A1OA-06  
 TCGA-WE-A8JZ-06  
 TCGA-FW-A3I3-06  
 TCGA-DA-A95W-06  
 TCGA-FR-A19F-06  
 TCGA-FS-A1YW-06  
 TCGA-D3-A8CI-06  
 TCGA-FS-A1ZK-06  
 TCGA-EE-A3JI-06  
 TCGA-3N-A9WB-06  
 TCGA-ER-A19L-06  
 TCGA-FS-A4F9-06  
 TCGA-FS-A4F0-06  
 TCGA-W3-A824-06  
 TCGA-D3-A8GV-06  
 TCGA-EE-A20C-06  
 TCGA-EE-A29E-06  
 TCGA-GN-A268-06  
 TCGA-RP-A695-06  
 TCGA-D9-A1X3-06  
 TCGA-GN-A4U7-06  
 TCGA-FS-A1Z3-06  
 TCGA-FS-A1ZE-06  
 TCGA-D3-A5GL-06  
 TCGA-EE-A180-06  
 TCGA-EE-A29L-06  
 TCGA-EE-A2GR-06  
 TCGA-EE-A185-06  
 TCGA-GN-A8LK-06  
 TCGA-D9-A4Z6-06  
 TCGA-FS-A1ZG-06  
 TCGA-EE-A3AD-06  
 TCGA-EE-A29D-06  
 TCGA-D9-A6EG-06

# GJB1

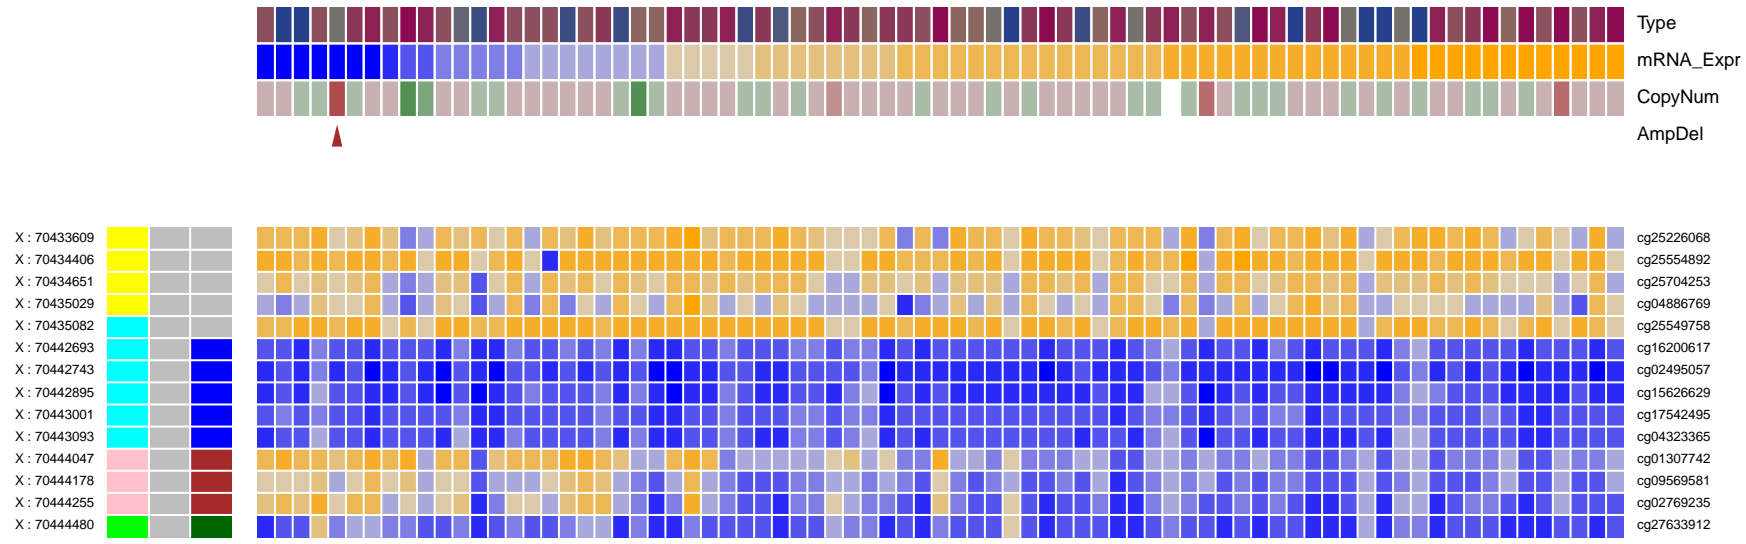

X: 70433609  
X: 70434406  
X: 70434651  
X: 70435029  
X: 70435082  
X: 70442693  
X: 70442743  
X: 70442895  
X: 70443001  
X: 70443093  
X: 70444047  
X: 70444178  
X: 70444255  
X: 70444480

GeneLoc  
PromoterAssoc  
CpGIsland

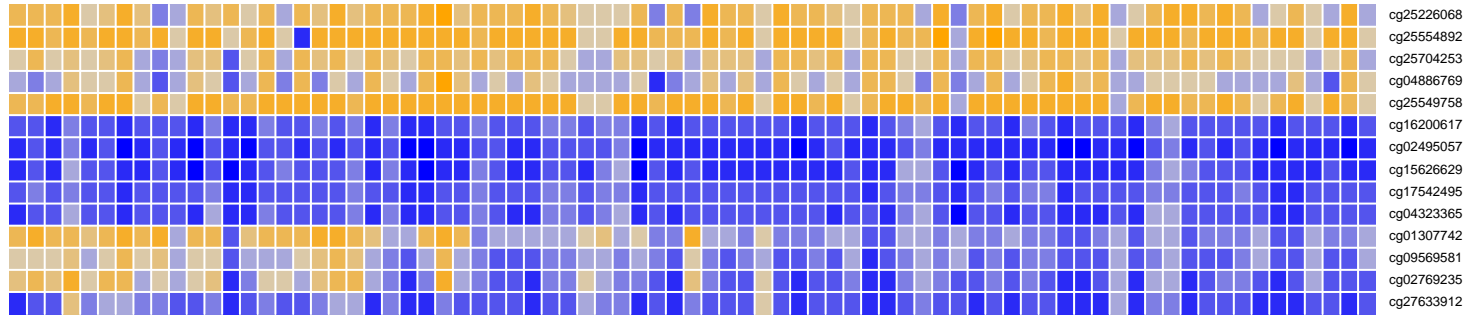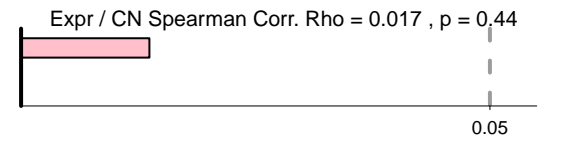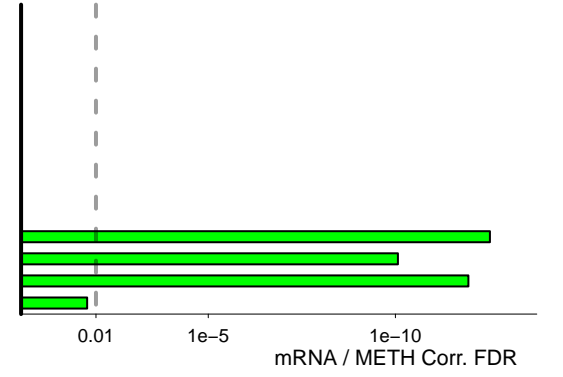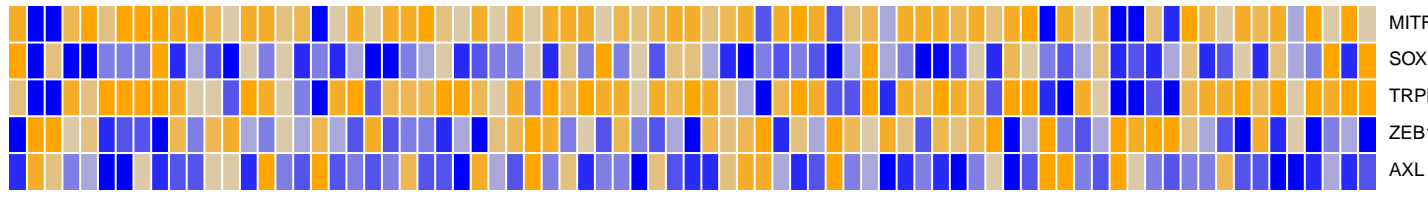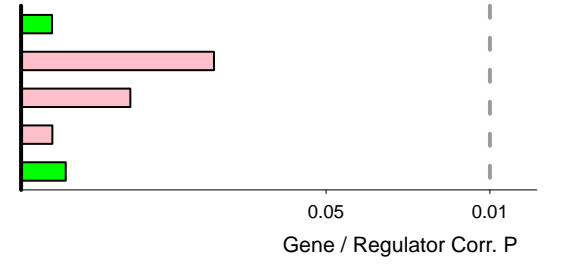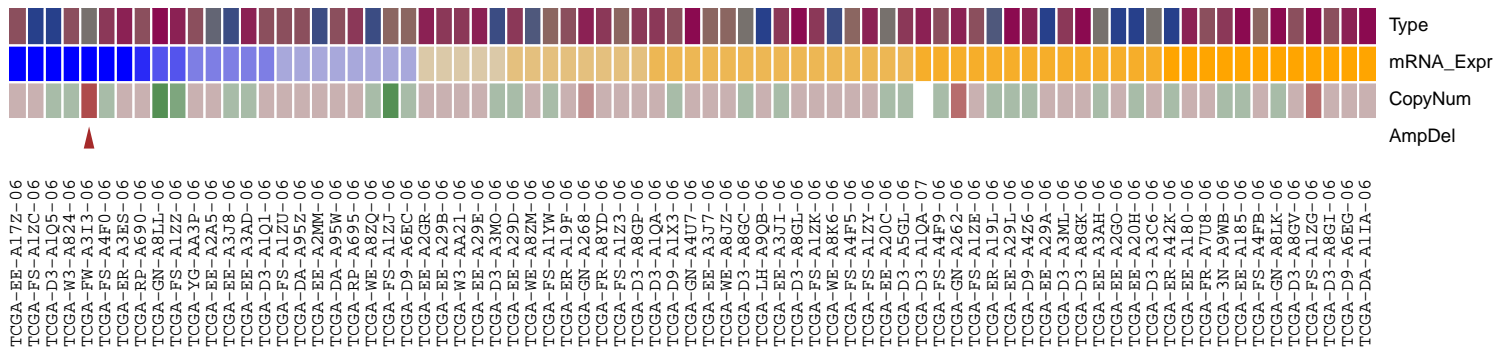

TCGA-EE-A17Z-06  
TCGA-FS-A1ZC-06  
TCGA-D3-A1Q5-06  
TCGA-W3-A824-06  
TCGA-FW-A313-06  
TCGA-FS-A4F0-06  
TCGA-ER-A3ES-06  
TCGA-RP-A690-06  
TCGA-GN-A8LL-06  
TCGA-FS-A1ZZ-06  
TCGA-YG-AA3P-06  
TCGA-EE-A2A5-06  
TCGA-EE-A378-06  
TCGA-EE-A3AD-06  
TCGA-D3-A1Q1-06  
TCGA-FS-A1ZU-06  
TCGA-DR-A9EZ-06  
TCGA-EE-A3MM-06  
TCGA-DA-A35W-06  
TCGA-RP-A695-06  
TCGA-WE-A8ZQ-06  
TCGA-FS-A1ZJ-06  
TCGA-D9-A6EC-06  
TCGA-EE-A2GR-06  
TCGA-EE-A29B-06  
TCGA-W3-AA21-06  
TCGA-EE-A29E-06  
TCGA-D3-A3M0-06  
TCGA-EE-A29D-06  
TCGA-WE-A8ZM-06  
TCGA-FS-A1YW-06  
TCGA-ER-A19F-06  
TCGA-GN-A268-06  
TCGA-FR-A8YD-06  
TCGA-FS-A1Z3-06  
TCGA-D3-A8QP-06  
TCGA-D3-A1QA-06  
TCGA-D9-A1X3-06  
TCGA-GN-A4U7-06  
TCGA-EE-A3J7-06  
TCGA-WE-A8JZ-06  
TCGA-D3-A8GC-06  
TCGA-LH-A9QB-06  
TCGA-EE-A3TI-06  
TCGA-D3-A8GL-06  
TCGA-FS-A1ZK-06  
TCGA-WE-A8K6-06  
TCGA-FS-A1P5-06  
TCGA-FS-A1ZY-06  
TCGA-EE-A3OC-06  
TCGA-D3-A5GL-06  
TCGA-D3-A1QA-07  
TCGA-FS-A4F9-06  
TCGA-GN-A262-06  
TCGA-FS-A1ZE-06  
TCGA-ER-A19L-06  
TCGA-EE-A29L-06  
TCGA-D9-A4Z6-06  
TCGA-EE-A29A-06  
TCGA-D3-A3ML-06  
TCGA-D3-A8GK-06  
TCGA-EE-A3AH-06  
TCGA-EE-A2GO-06  
TCGA-EE-A20H-06  
TCGA-D3-A3C6-06  
TCGA-ER-A4ZK-06  
TCGA-EE-A180-06  
TCGA-FR-A7U8-06  
TCGA-3N-A9WB-06  
TCGA-EE-A185-06  
TCGA-FS-A4FB-06  
TCGA-GN-A8LK-06  
TCGA-D3-A8GV-06  
TCGA-FS-A1ZG-06  
TCGA-D3-A8GI-06  
TCGA-D9-A6EG-06  
TCGA-DA-A1IA-06



# IGSF8

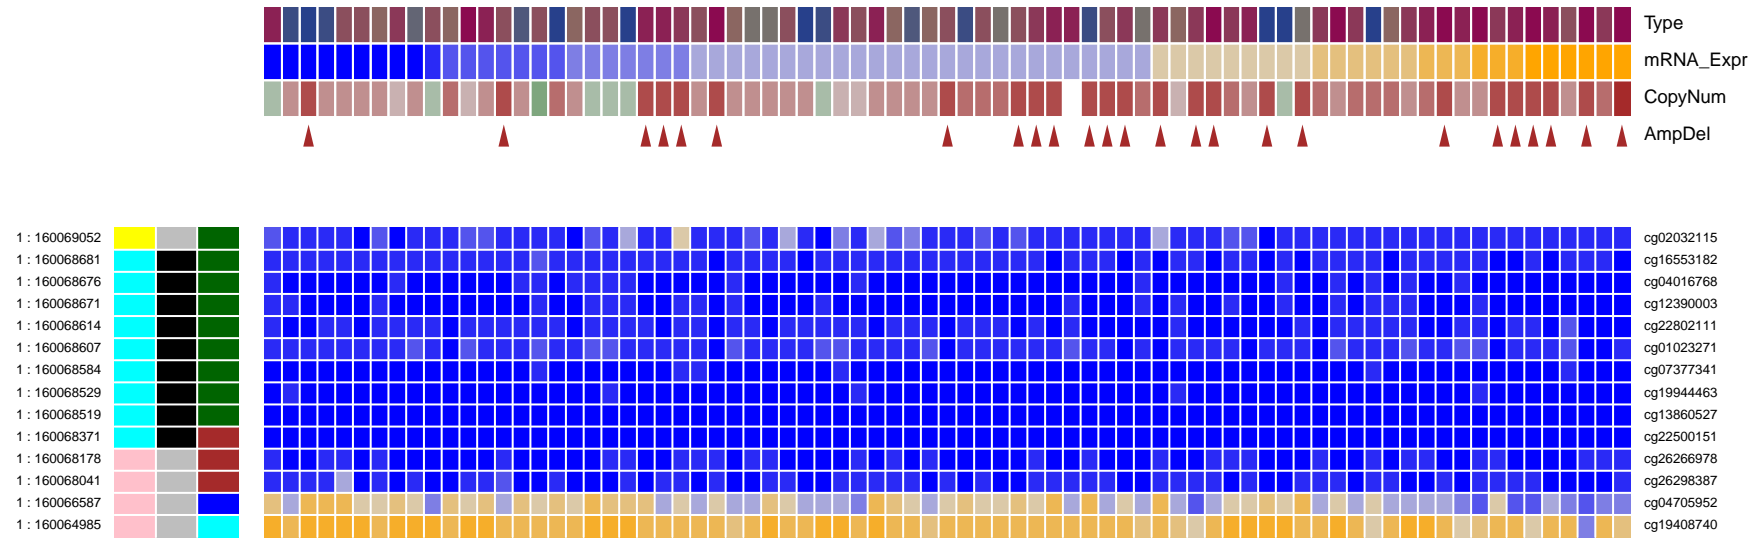

GeneLoc  
PromoterAssoc  
CpGIsland

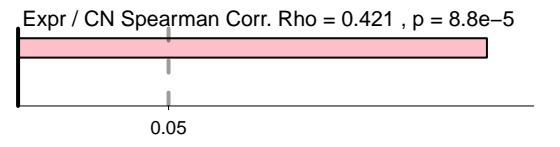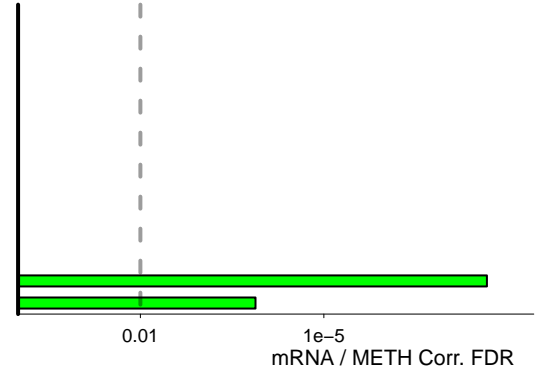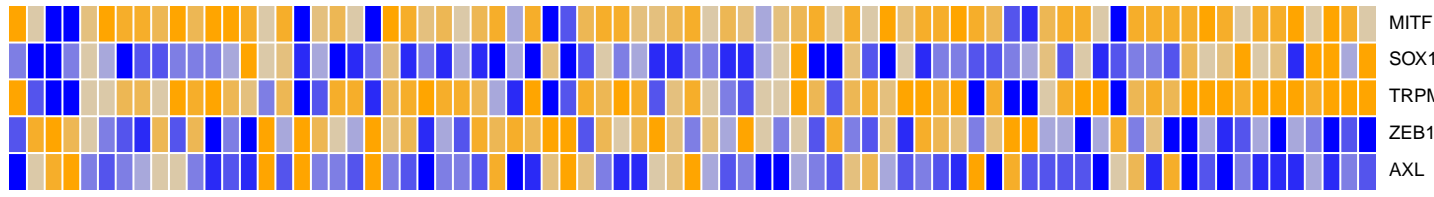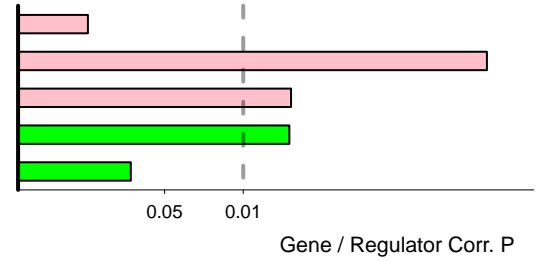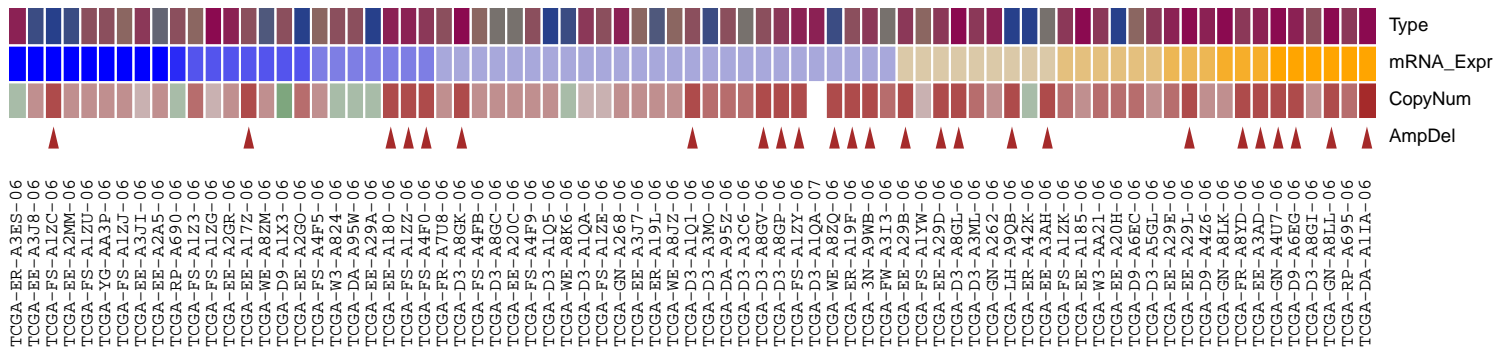

# GPR137B

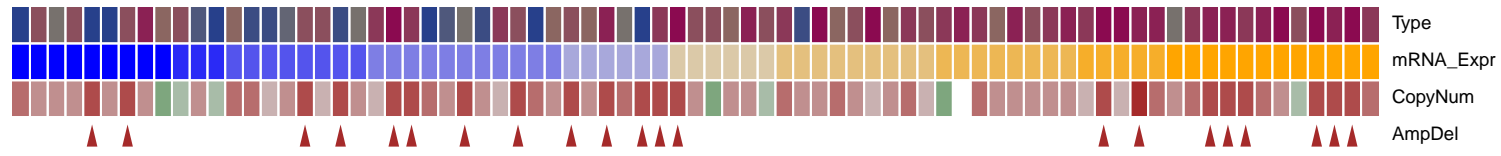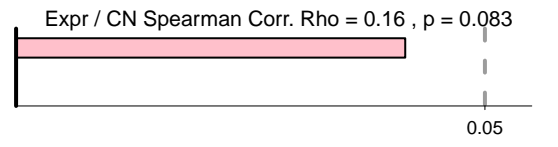

1: 236304396  
 1: 236304503  
 1: 236304799  
 1: 236304895  
 1: 236305010  
 1: 236305024  
 1: 236305169  
 1: 236305619  
 1: 236305663  
 1: 236305768  
 1: 236305819  
 1: 236305875  
 1: 236306000  
 1: 236306311  
 1: 236306640  
 1: 236306673  
 1: 236306767  
 1: 236308094  
 1: 236309960  
 1: 236318427  
 1: 236318493  
 1: 236318545  
 1: 236339010  
 1: 236369876  
 1: 236372060

GeneLoc  
 PromoterAssoc  
 CpGIsland

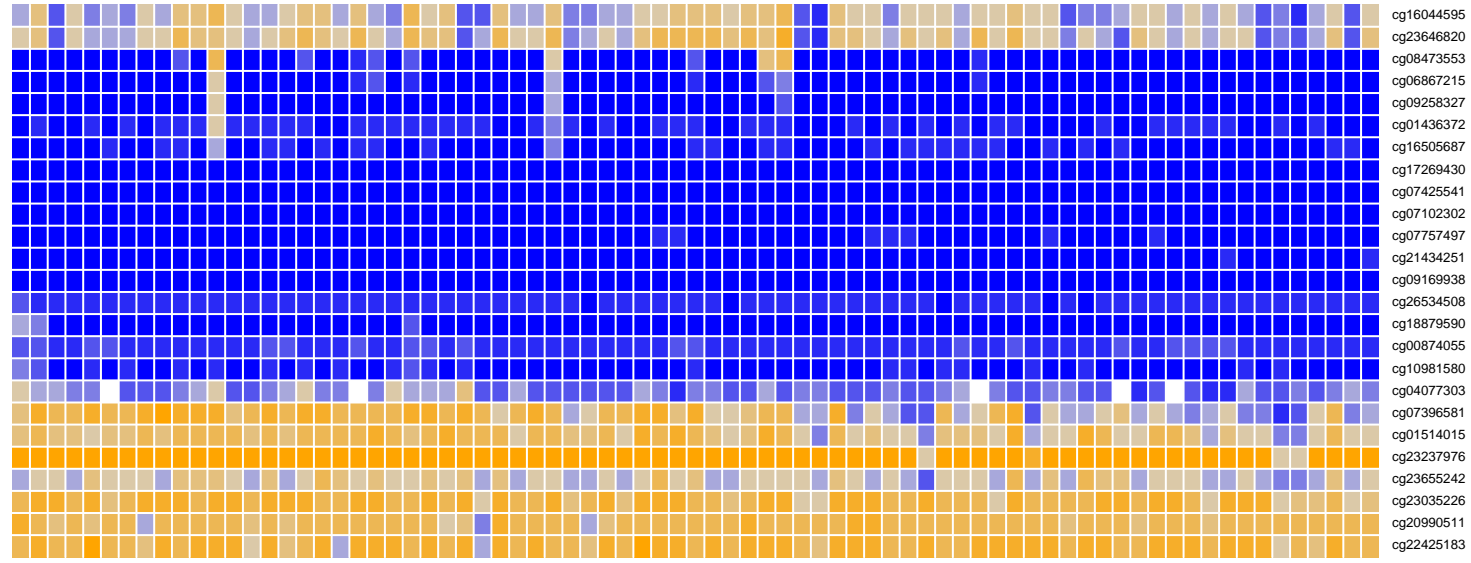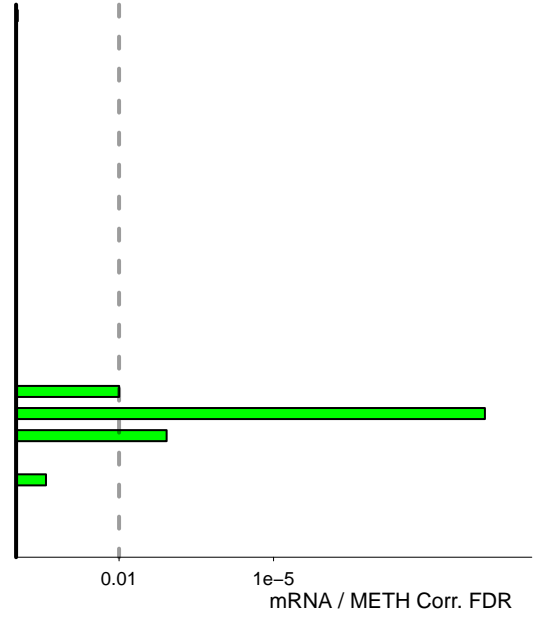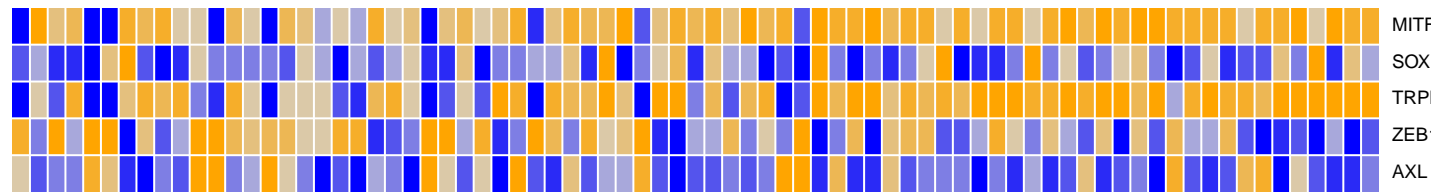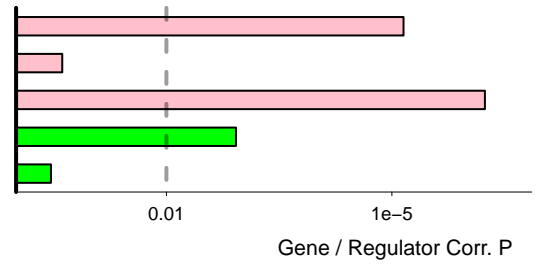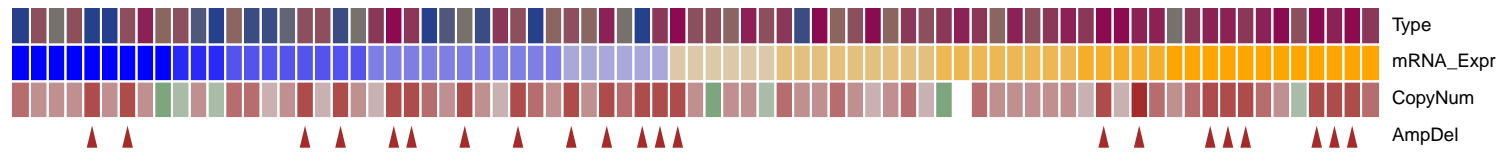

TCGA-EE-A20H-06  
 TCGA-YG-AA3P-06  
 TCGA-D3-A3C6-06  
 TCGA-FR-A7U8-06  
 TCGA-FS-A1ZC-06  
 TCGA-D3-A1O5-06  
 TCGA-EE-A17Z-06  
 TCGA-GN-A262-06  
 TCGA-FS-A1ZJ-06  
 TCGA-DA-A95W-06  
 TCGA-WE-A82M-06  
 TCGA-EE-A29A-06  
 TCGA-FS-A1Z3-06  
 TCGA-D3-A3M0-06  
 TCGA-EE-A2MM-06  
 TCGA-EE-A2A5-06  
 TCGA-FS-A1ZU-06  
 TCGA-D3-A6CV-06  
 TCGA-WE-A6ZQ-06  
 TCGA-EE-A20C-06  
 TCGA-EE-A3JI-06  
 TCGA-D3-A6GK-06  
 TCGA-EE-A2GO-06  
 TCGA-ER-A19L-06  
 TCGA-EE-A3AH-06  
 TCGA-EE-A3J8-06  
 TCGA-FS-A4F0-06  
 TCGA-D3-A1Q1-06  
 TCGA-ER-A42K-06  
 TCGA-EE-A3J7-06  
 TCGA-ER-A19F-06  
 TCGA-FS-A4FB-06  
 TCGA-FS-A1ZY-06  
 TCGA-FW-A3I3-06  
 TCGA-LH-A9QB-06  
 TCGA-EE-A29B-06  
 TCGA-EE-A29L-06  
 TCGA-DA-A95Z-06  
 TCGA-D9-A1X3-06  
 TCGA-FS-A4F5-06  
 TCGA-EE-A2GR-06  
 TCGA-W3-A824-06  
 TCGA-D3-A3ML-06  
 TCGA-WE-A8K6-06  
 TCGA-GN-A8LH-06  
 TCGA-D9-A6EC-06  
 TCGA-FS-A4F9-06  
 TCGA-WE-A87Z-06  
 TCGA-EE-A29E-06  
 TCGA-FS-A1ZE-06  
 TCGA-FR-A61D-06  
 TCGA-D3-A1QA-07  
 TCGA-FS-A1YW-06  
 TCGA-GN-A268-06  
 TCGA-D3-A8GI-06  
 TCGA-D3-A5GL-06  
 TCGA-D9-A4Z6-06  
 TCGA-D3-A1QA-06  
 TCGA-D3-A6GL-06  
 TCGA-EE-A185-06  
 TCGA-EE-A180-06  
 TCGA-ER-A3ES-06  
 TCGA-D3-A8GC-06  
 TCGA-FS-A1ZK-06  
 TCGA-EE-A3AD-06  
 TCGA-FS-A1ZZ-06  
 TCGA-3N-A9WB-06  
 TCGA-EE-A29E-06  
 TCGA-GN-A8LK-06  
 TCGA-RP-A690-06  
 TCGA-DA-A1IA-06  
 TCGA-D9-A6EG-06  
 TCGA-GN-A4U7-06  
 TCGA-RP-A695-06

# SEMA6A

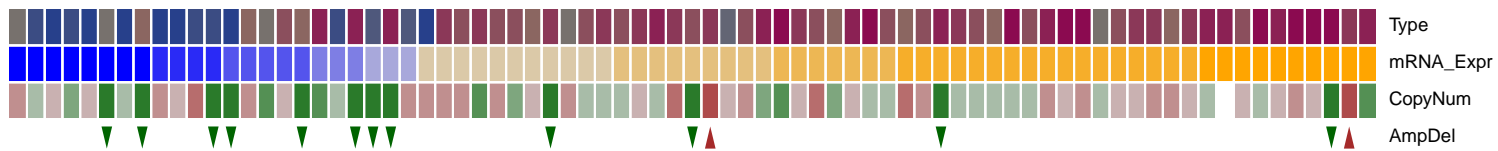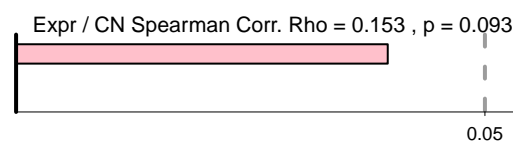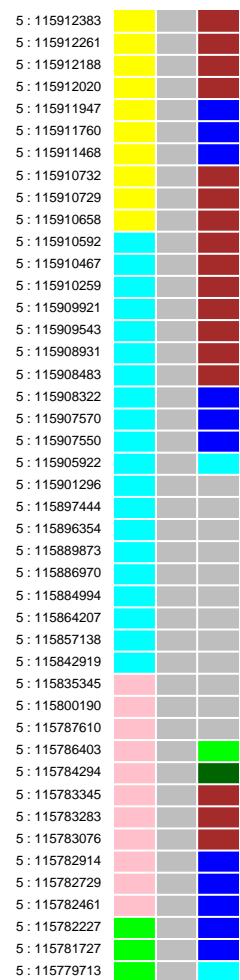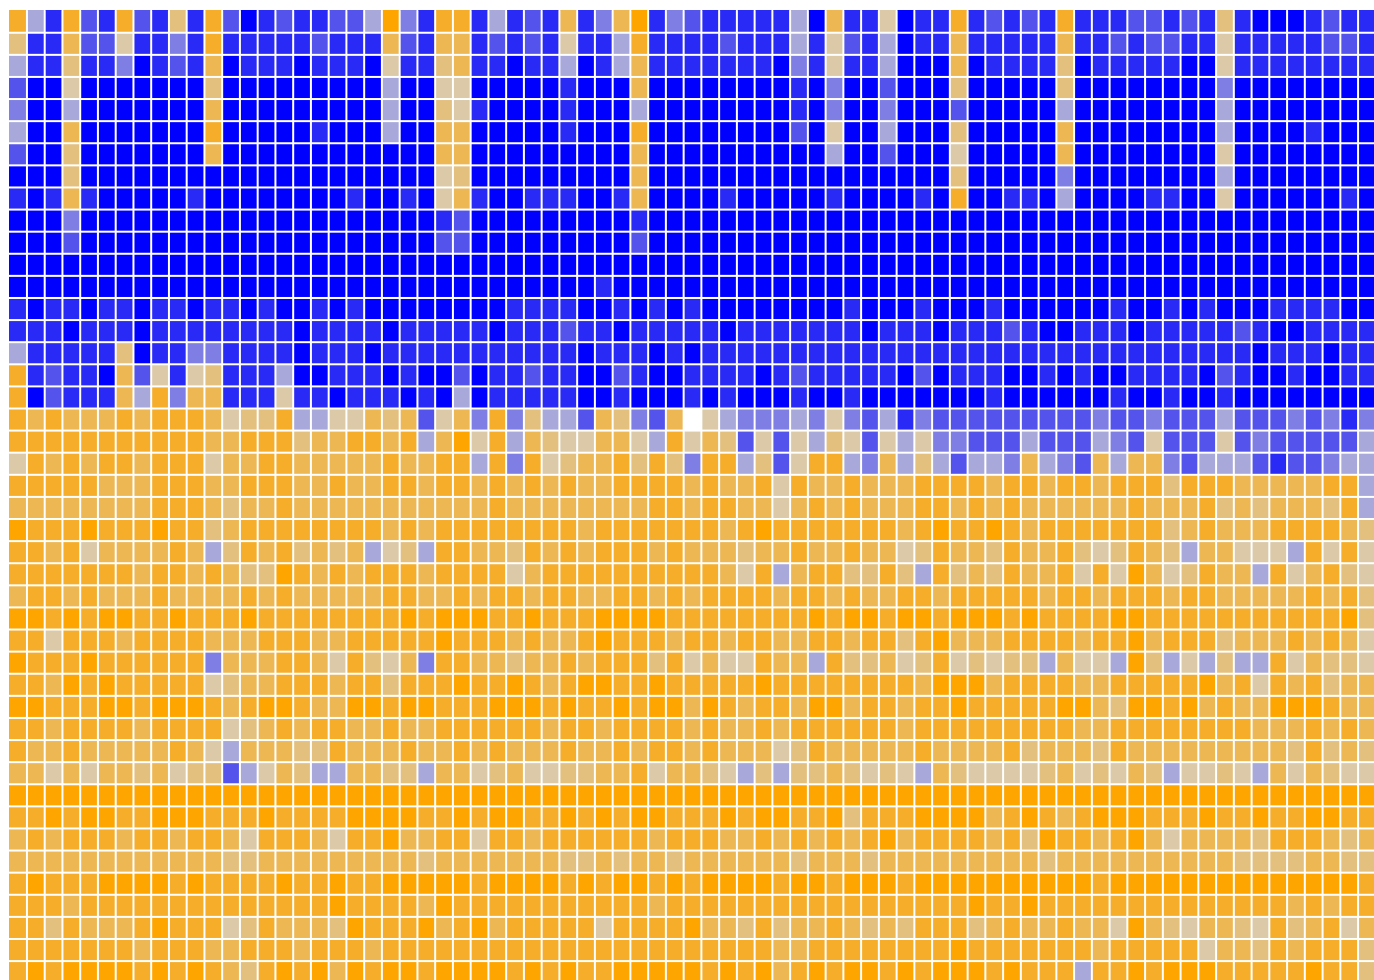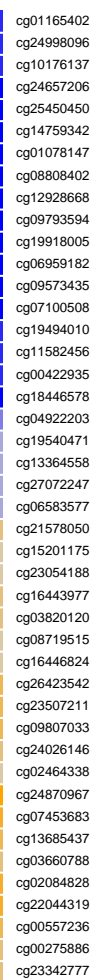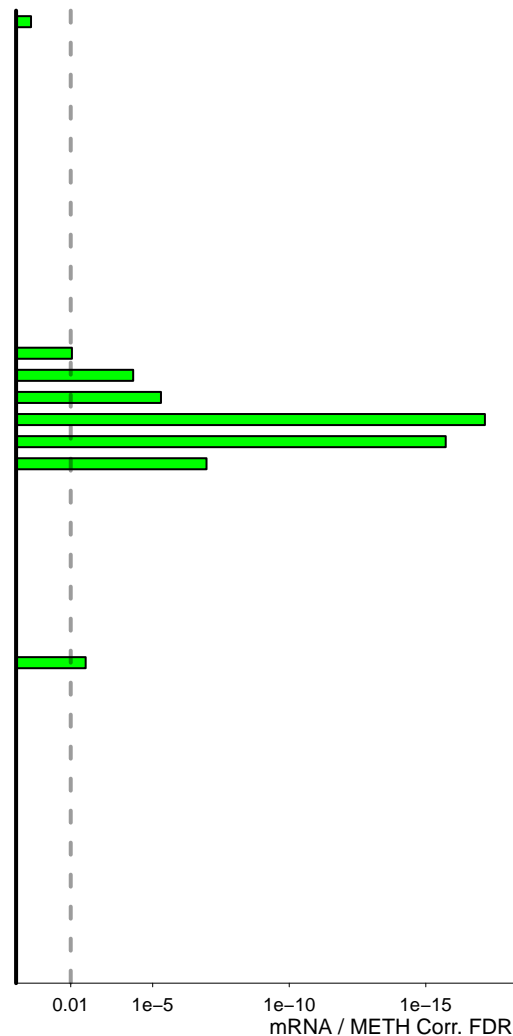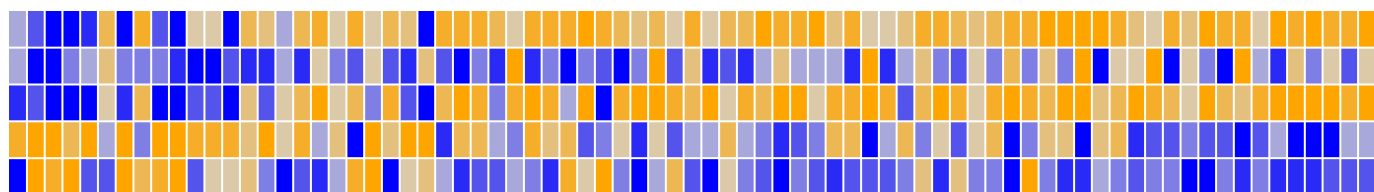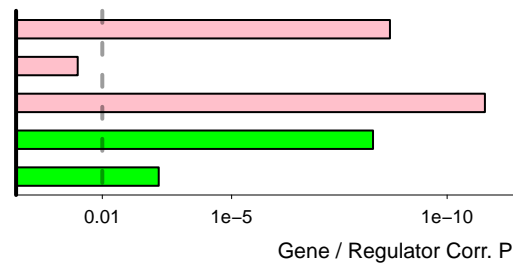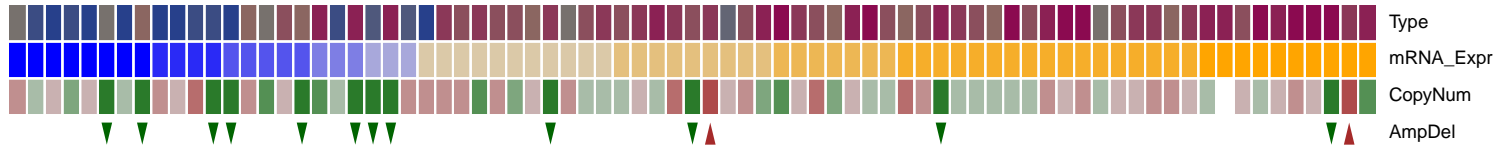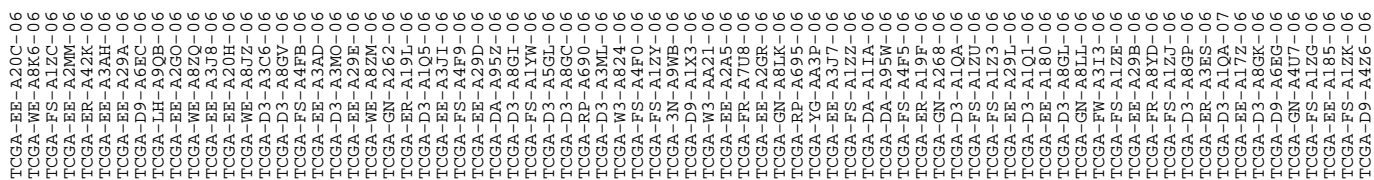

# NR4A3

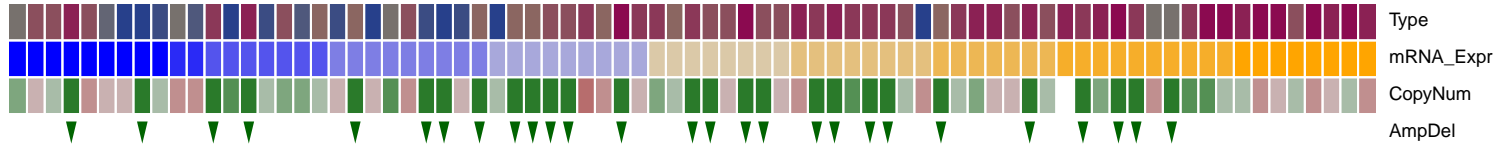

9 : 102582694  
 9 : 102583229  
 9 : 102583386  
 9 : 102583569  
 9 : 102583693  
 9 : 102584145  
 9 : 102584491  
 9 : 102584806  
 9 : 102585321  
 9 : 102585669  
 9 : 102586371  
 9 : 102586628  
 9 : 102586828  
 9 : 102587074  
 9 : 102587494  
 9 : 102588232  
 9 : 102589165  
 9 : 102590743  
 9 : 102591302  
 9 : 102613887

GeneLoc  
 PromoterAssoc  
 CpGIsland

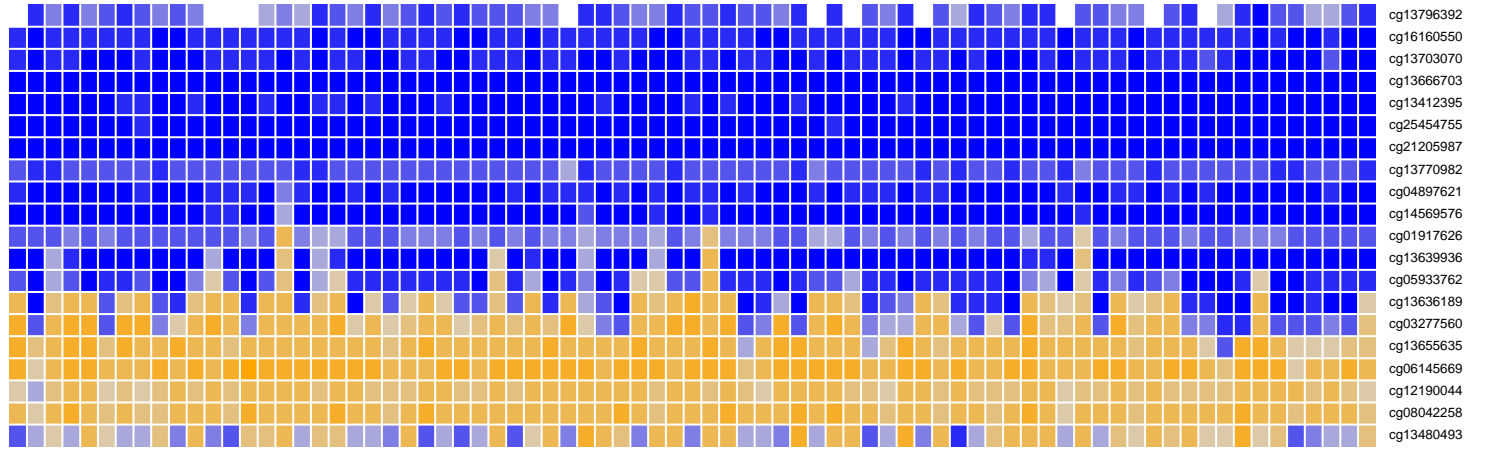

cg13796392  
 cg16160550  
 cg13703070  
 cg13666703  
 cg13412395  
 cg25454755  
 cg21205987  
 cg13770982  
 cg04897621  
 cg14569576  
 cg01917626  
 cg13639936  
 cg05933762  
 cg13636189  
 cg03277560  
 cg13655635  
 cg06145669  
 cg12190044  
 cg08042258  
 cg13480493

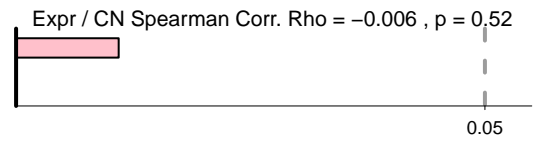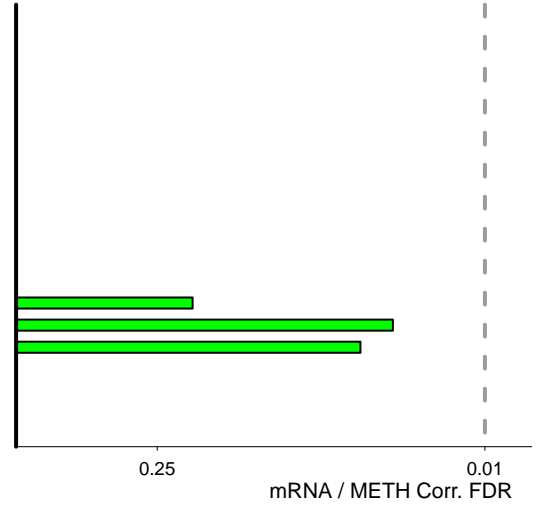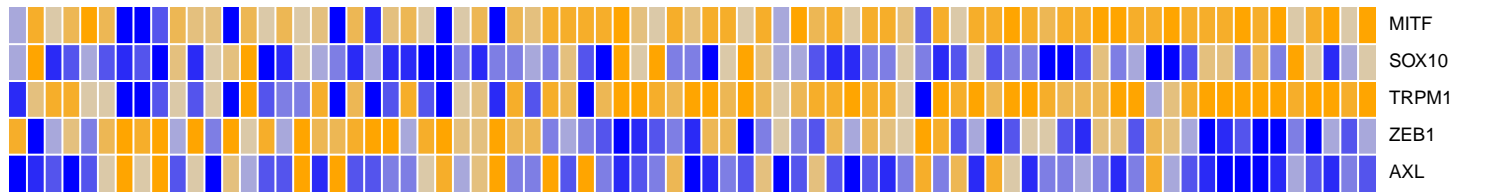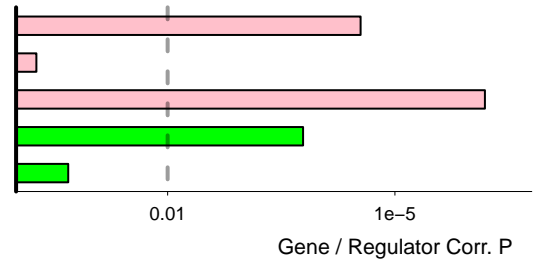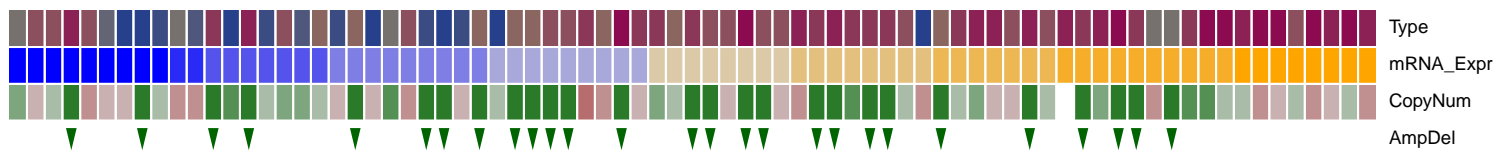

TCGA-EE-A20C-06  
 TCGA-EE-A17Z-06  
 TCGA-DA-A95W-06  
 TCGA-GN-A262-06  
 TCGA-YG-AA3P-06  
 TCGA-EE-A2A5-06  
 TCGA-EE-A20H-06  
 TCGA-WE-A8K6-06  
 TCGA-EE-A3AH-06  
 TCGA-ER-A19I-06  
 TCGA-D3-A8GP-06  
 TCGA-D3-A1O5-06  
 TCGA-FS-A1ZY-06  
 TCGA-DA-A95Z-06  
 TCGA-WE-A8Z0-06  
 TCGA-WE-A8ZM-06  
 TCGA-EE-A3J7-06  
 TCGA-EE-A2NM-06  
 TCGA-FS-A4FB-06  
 TCGA-ER-A4ZK-06  
 TCGA-D3-A3C6-06  
 TCGA-FR-A7U8-06  
 TCGA-EE-A3J8-06  
 TCGA-FS-A1ZC-06  
 TCGA-D3-A3MO-06  
 TCGA-WE-A8JZ-06  
 TCGA-EE-A29A-06  
 TCGA-FS-A1Z3-06  
 TCGA-FS-A4F5-06  
 TCGA-D3-A1Q1-06  
 TCGA-D9-A1X3-06  
 TCGA-D3-A3ML-06  
 TCGA-FS-A1ZJ-06  
 TCGA-GN-A8LL-06  
 TCGA-EE-A29B-06  
 TCGA-FR-A8YD-06  
 TCGA-D9-A6EC-06  
 TCGA-FS-A4F0-06  
 TCGA-FS-A4F9-06  
 TCGA-FS-A1ZE-06  
 TCGA-DA-A1IA-06  
 TCGA-ER-A19F-06  
 TCGA-EE-A2GR-06  
 TCGA-D3-A8GV-06  
 TCGA-D3-A1QA-06  
 TCGA-W3-AA21-06  
 TCGA-FS-A1ZK-06  
 TCGA-EE-A29D-06  
 TCGA-D3-A5GL-06  
 TCGA-FS-A1ZL-06  
 TCGA-LH-A9Q5-06  
 TCGA-FS-A1YB-06  
 TCGA-3N-A9WB-06  
 TCGA-EE-A3AD-06  
 TCGA-EE-A29F-06  
 TCGA-RP-A690-06  
 TCGA-GN-A288-06  
 TCGA-W3-A8Z4-06  
 TCGA-D3-A1QA-07  
 TCGA-EE-A3JI-06  
 TCGA-EE-A180-06  
 TCGA-D3-A8GL-06  
 TCGA-RP-A695-06  
 TCGA-D3-A8GC-06  
 TCGA-FW-A3I3-06  
 TCGA-FS-A1ZK-06  
 TCGA-GN-A4U7-06  
 TCGA-ER-A3ES-06  
 TCGA-EE-A29L-06  
 TCGA-FS-A1ZG-06  
 TCGA-D3-A8GI-06  
 TCGA-EE-A185-06  
 TCGA-D9-A6FG-06  
 TCGA-D3-A8GK-06  
 TCGA-D9-A4Z6-06

# DCT

13 : 95132211  
 13 : 95131951  
 13 : 95131809  
 13 : 95116571

GeneLoc  
 PromoterAssoc  
 CpGIsland

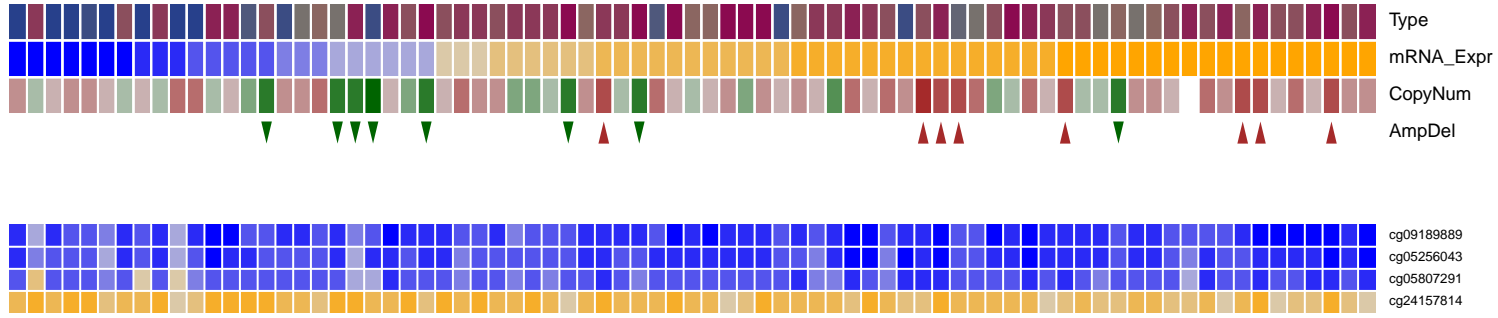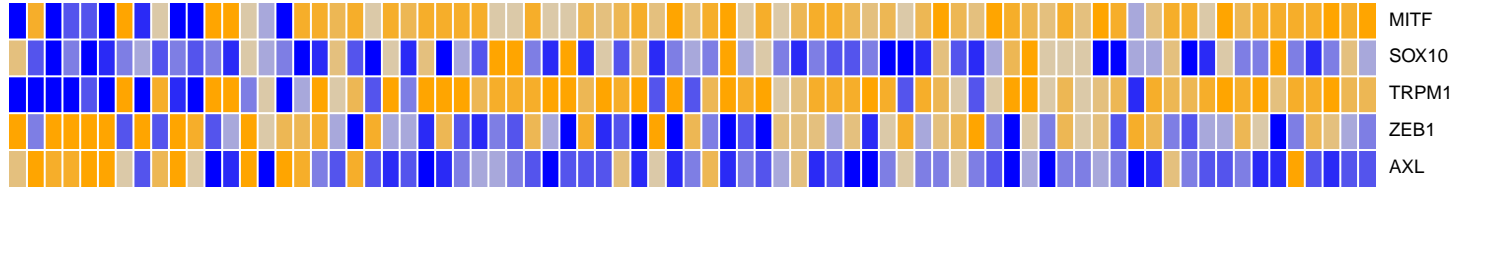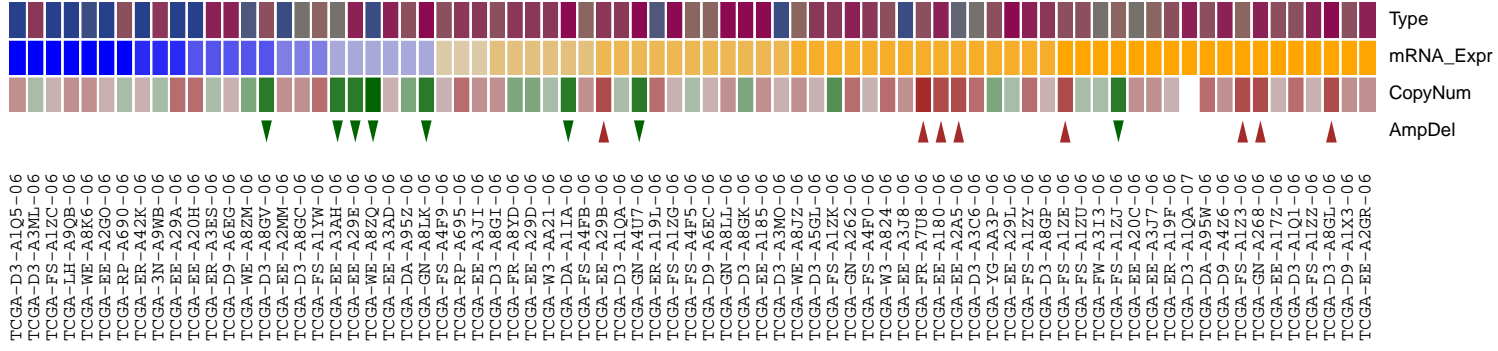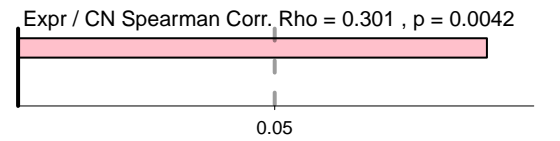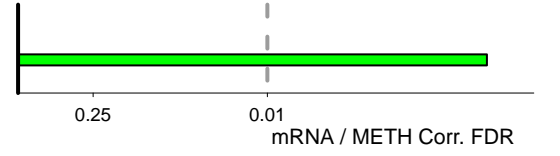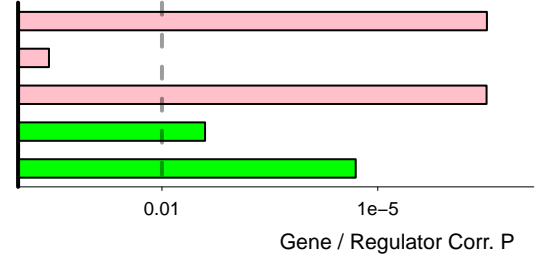

# SLC45A2

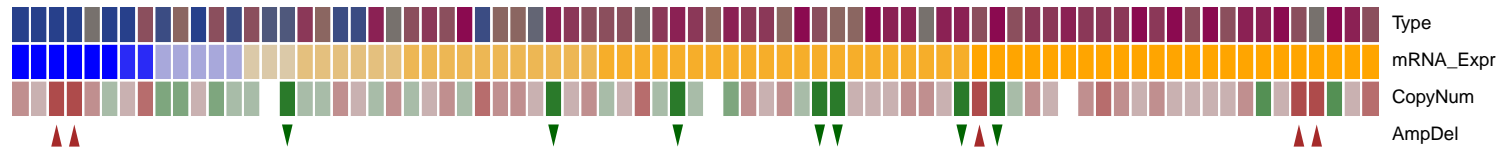

5 : 33985937  
 5 : 33984930  
 5 : 33984781  
 5 : 33984768  
 5 : 33984660  
 5 : 33984559  
 5 : 33982208  
 5 : 33958213  
 5 : 33946698

GeneLoc  
 PromoterAssoc  
 CpGIsland

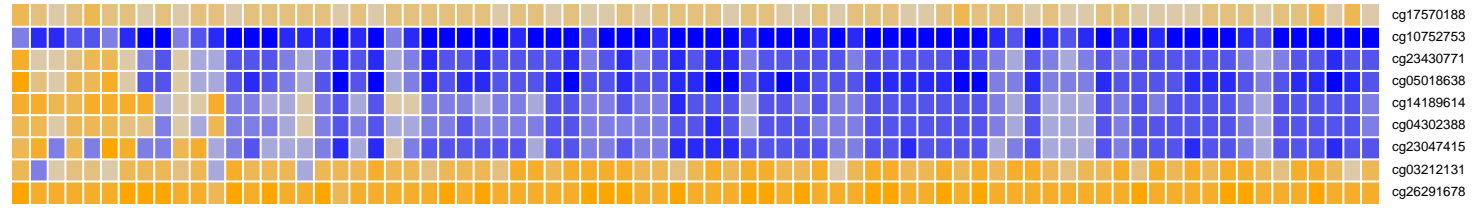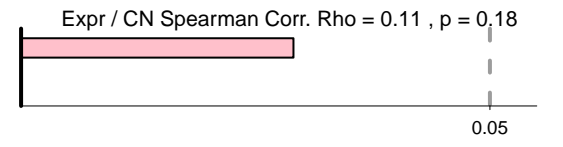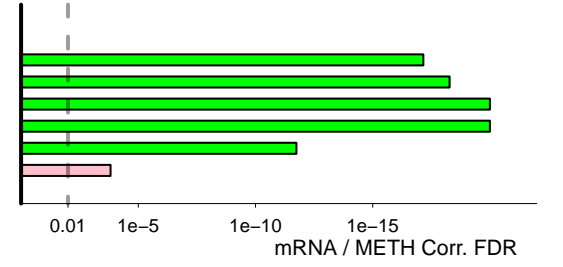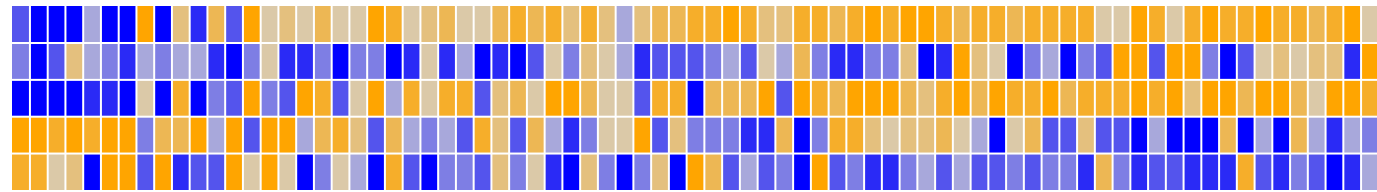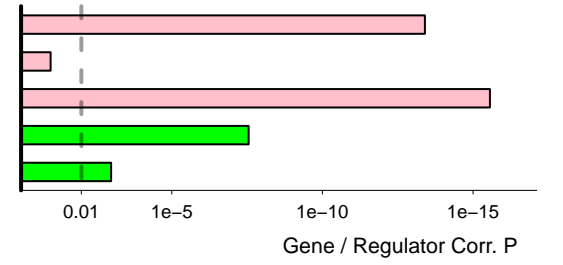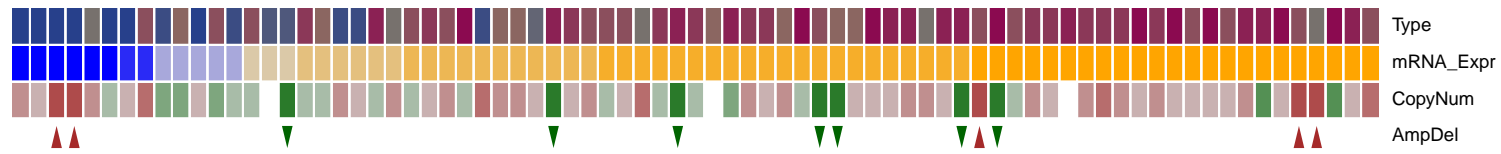

TCGA-LH-A9QB-06  
 TCGA-FS-A1ZC-06  
 TCGA-EE-A20H-06  
 TCGA-D3-A1Q5-06  
 TCGA-EE-A20C-06  
 TCGA-EE-A29A-06  
 TCGA-EE-A2GO-06  
 TCGA-YG-AA3P-06  
 TCGA-EE-A2MM-06  
 TCGA-EE-A3J7-06  
 TCGA-EE-A42K-06  
 TCGA-DA-A95Z-06  
 TCGA-WE-A8K6-06  
 TCGA-EP-A690-06  
 TCGA-WE-A8ZM-06  
 TCGA-EE-A191-06  
 TCGA-FS-A121-06  
 TCGA-FS-A1Z3-06  
 TCGA-EE-A3J8-06  
 TCGA-D3-A3MO-06  
 TCGA-ER-A3ES-06  
 TCGA-D3-A8GC-06  
 TCGA-DA-A95W-06  
 TCGA-D3-A8GP-06  
 TCGA-ER-A7U8-06  
 TCGA-D3-A8GK-06  
 TCGA-WE-A8ZQ-06  
 TCGA-WE-A8JZ-06  
 TCGA-FS-A1ZJ-06  
 TCGA-EE-A2A5-06  
 TCGA-EE-A3AD-06  
 TCGA-FS-A4FO-06  
 TCGA-ER-A19F-06  
 TCGA-FS-A1ZU-06  
 TCGA-D3-A8GV-06  
 TCGA-D3-A3C6-06  
 TCGA-D3-A1QA-06  
 TCGA-GN-A262-06  
 TCGA-D3-A3ML-06  
 TCGA-D9-A6EC-06  
 TCGA-EE-A2GR-06  
 TCGA-EE-A3JI-06  
 TCGA-EE-A29B-06  
 TCGA-FS-A4F5-06  
 TCGA-EE-A291-06  
 TCGA-D3-A1O1-06  
 TCGA-FS-A4FB-06  
 TCGA-FS-A1YH-06  
 TCGA-D3-A8GI-06  
 TCGA-GN-A268-06  
 TCGA-EE-A180-06  
 TCGA-FW-A313-06  
 TCGA-FS-A1Z1-06  
 TCGA-D9-A1X3-06  
 TCGA-EE-A185-06  
 TCGA-W3-A824-06  
 TCGA-EE-A29D-06  
 TCGA-EP-A695-06  
 TCGA-D3-A1QA-07  
 TCGA-D3-A5GL-06  
 TCGA-ZN-A9WB-06  
 TCGA-FR-A8YD-06  
 TCGA-GN-A8LL-06  
 TCGA-FS-A1ZK-06  
 TCGA-DA-A1IA-06  
 TCGA-EE-A17Z-06  
 TCGA-FS-A1ZG-06  
 TCGA-FS-A4F9-06  
 TCGA-EE-A29E-06  
 TCGA-D9-A4Z6-06  
 TCGA-GN-A4U7-06  
 TCGA-FS-A1ZE-06  
 TCGA-EE-A3AH-06  
 TCGA-GN-A8LK-06  
 TCGA-D9-A6EG-06  
 TCGA-D3-A8GI-06

# PLP1

X : 103029964  
 X : 103030149  
 X : 103030593  
 X : 103030978  
 X : 103031374  
 X : 103031450  
 X : 103031565  
 X : 103031822  
 X : 103032137  
 X : 103035890  
 X : 103046141

GeneLoc  
 PromoterAssoc  
 CpGIsland

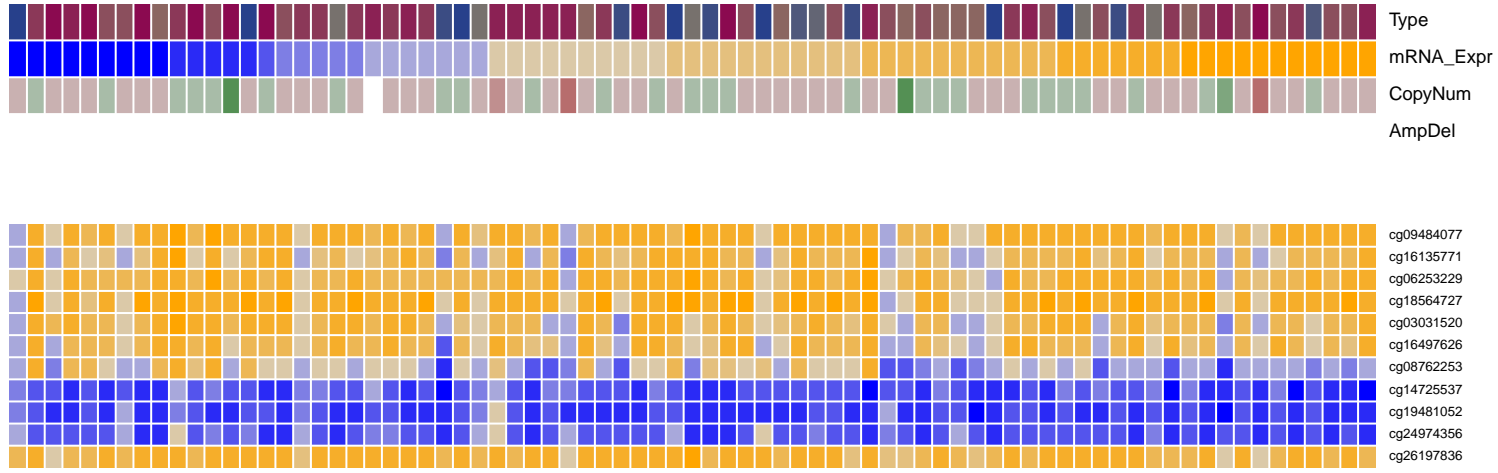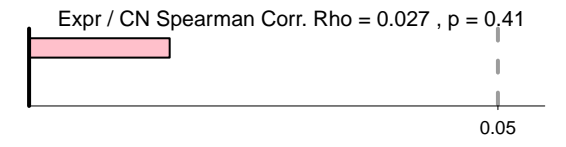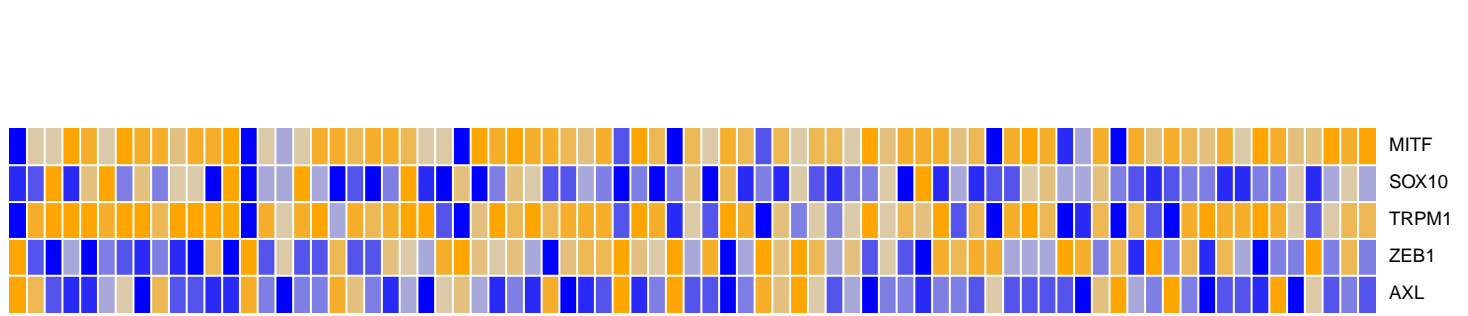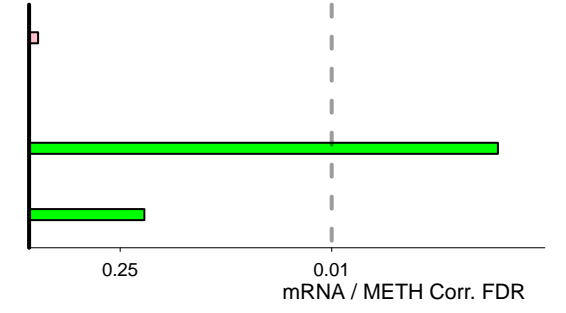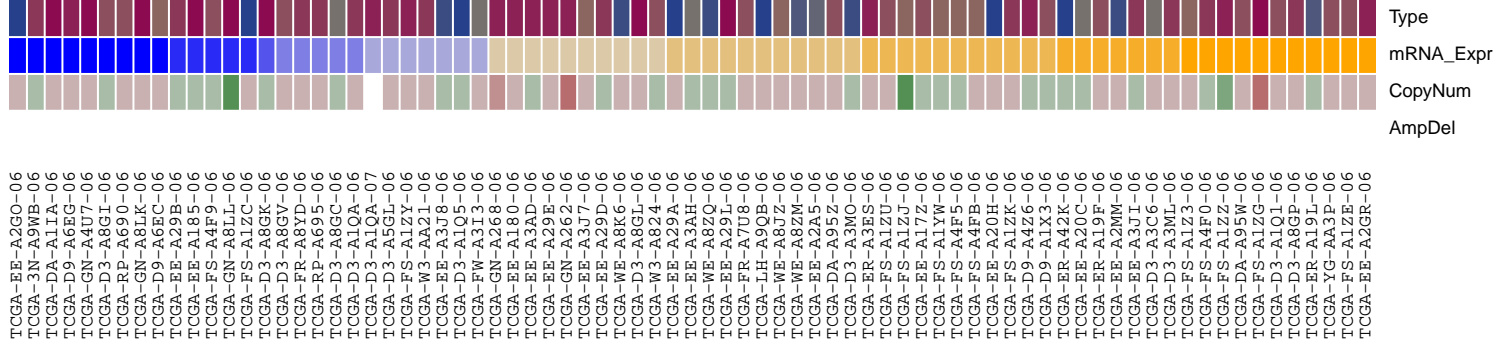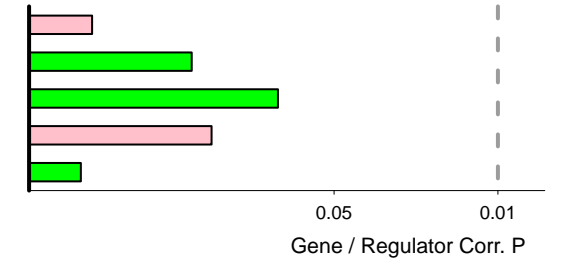

# PLEKHH1

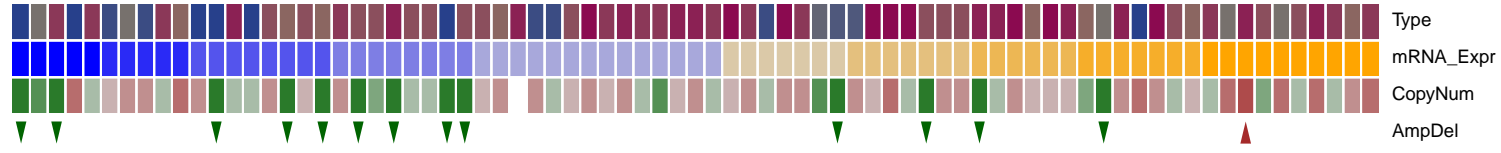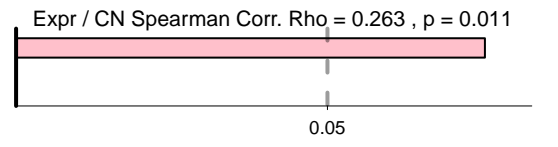

14 : 67999390  
 14 : 67999431  
 14 : 67999752  
 14 : 67999829  
 14 : 67999847  
 14 : 67999851  
 14 : 67999913  
 14 : 67999927  
 14 : 67999935  
 14 : 67999948  
 14 : 68000301  
 14 : 68000381  
 14 : 68002903  
 14 : 68008669  
 14 : 68008964  
 14 : 68023941  
 14 : 68036318  
 14 : 68037077  
 14 : 68038121  
 14 : 68038799  
 14 : 68038877  
 14 : 68038953  
 14 : 68040530  
 14 : 68042281

GeneLoc  
 PromoterAssoc  
 CpGIsland

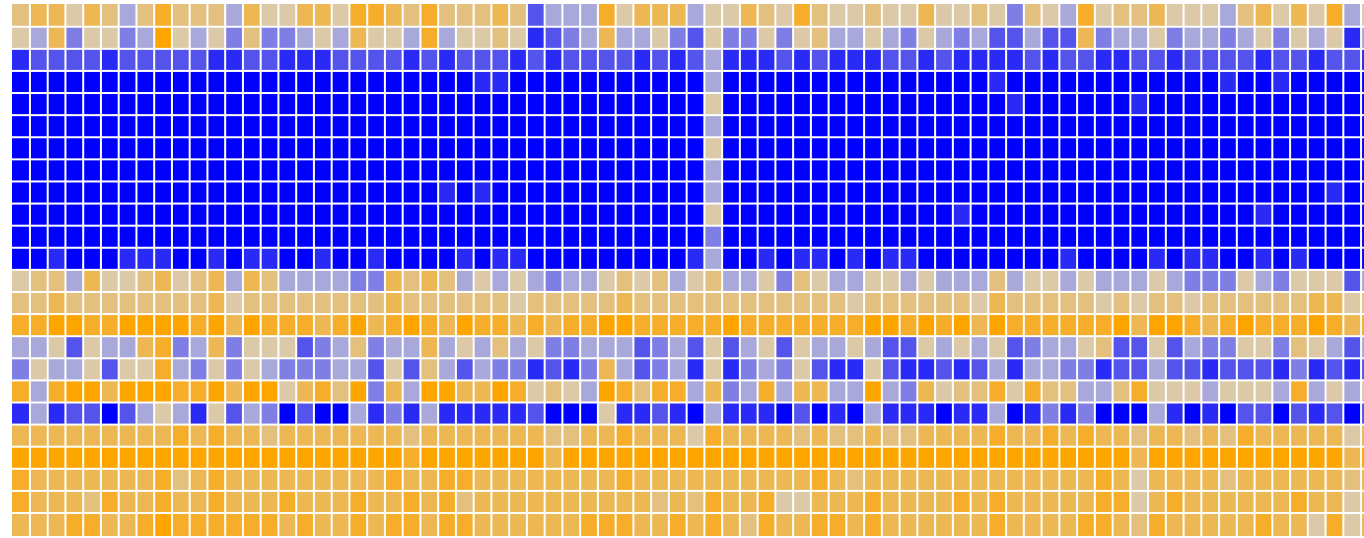

cg15964212  
 cg18204200  
 cg01961018  
 cg06187373  
 cg16056611  
 cg21815781  
 cg24104633  
 cg18143693  
 cg02268291  
 cg07571970  
 cg10044111  
 cg17594334  
 cg15949845  
 cg00740870  
 cg06892679  
 cg17316862  
 cg01095658  
 cg10726892  
 cg14876708  
 cg16576052  
 cg19916330  
 cg17489562  
 cg21104155  
 cg21112391

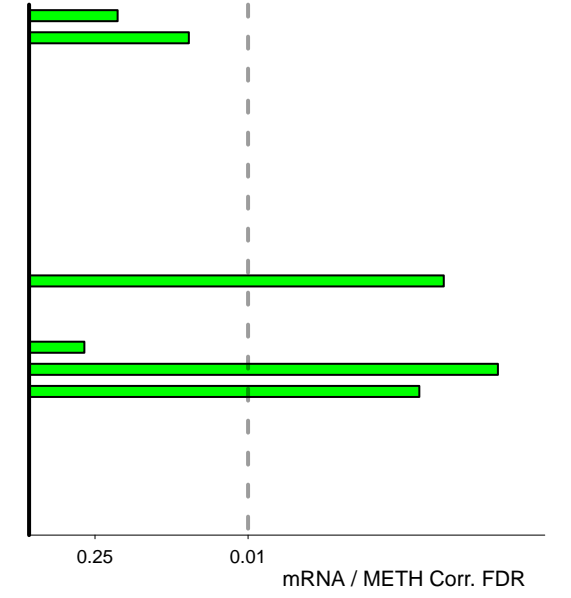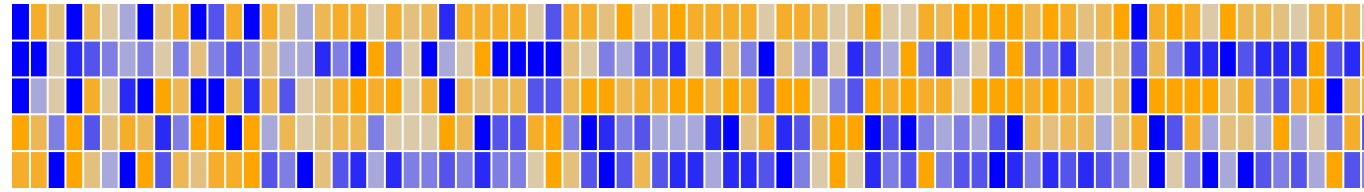

MITF  
 SOX10  
 TRPM1  
 ZEB1  
 AXL

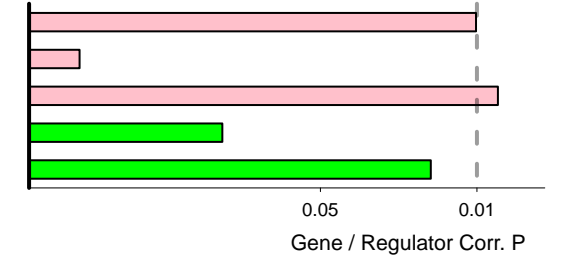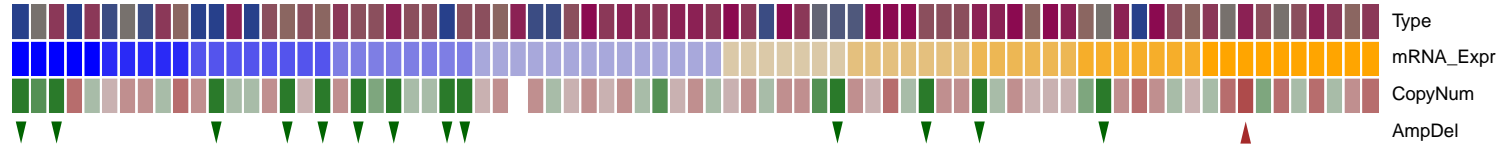

TCGA-FS-A1ZC-06  
 TCGA-D3-A8GC-06  
 TCGA-D3-A8GP-06  
 TCGA-EE-A2GO-06  
 TCGA-D3-A1QA-06  
 TCGA-D3-A3MO-06  
 TCGA-EE-A20C-06  
 TCGA-EE-A2MM-06  
 TCGA-EE-A29B-06  
 TCGA-D9-A6EC-06  
 TCGA-D3-A1Q5-06  
 TCGA-LH-A9QB-06  
 TCGA-EE-A29E-06  
 TCGA-EE-A29A-06  
 TCGA-D9-A1X3-06  
 TCGA-FS-A4F5-06  
 TCGA-D3-A8GV-06  
 TCGA-WE-A8VZ-06  
 TCGA-EE-A82D-06  
 TCGA-FS-A4F9-06  
 TCGA-D3-A8GI-06  
 TCGA-GN-A268-06  
 TCGA-FS-A1ZU-06  
 TCGA-W3-A824-06  
 TCGA-ER-A42K-06  
 TCGA-FS-A1ZE-06  
 TCGA-EE-A172-06  
 TCGA-FS-A1ZJ-06  
 TCGA-D3-A1QA-07  
 TCGA-EE-A3J8-06  
 TCGA-WE-A8K6-06  
 TCGA-ER-A19F-06  
 TCGA-EE-A185-06  
 TCGA-FS-A4F0-06  
 TCGA-EE-A2GR-06  
 TCGA-3N-A9WB-06  
 TCGA-FS-A1ZK-06  
 TCGA-D9-A6EG-06  
 TCGA-EE-A3AD-06  
 TCGA-EE-A3JI-06  
 TCGA-GN-A4U7-06  
 TCGA-D3-A5GL-06  
 TCGA-WE-A8ZQ-06  
 TCGA-GN-A8LK-06  
 TCGA-RP-A695-06  
 TCGA-EE-A2A5-06  
 TCGA-WE-A8ZM-06  
 TCGA-ER-A19L-06  
 TCGA-FS-A1ZG-06  
 TCGA-D3-A8GK-06  
 TCGA-DA-A1IA-06  
 TCGA-D3-A1QJ-06  
 TCGA-FR-A708-06  
 TCGA-D9-A826-06  
 TCGA-ER-A3ES-06  
 TCGA-GN-A8LL-06  
 TCGA-FS-A1Z3-06  
 TCGA-D3-A8GL-06  
 TCGA-FS-A1ZZ-06  
 TCGA-EE-A3J7-06  
 TCGA-EE-A3AH-06  
 TCGA-EE-A180-06  
 TCGA-EE-A20H-06  
 TCGA-EE-A29L-06  
 TCGA-RP-A690-06  
 TCGA-FS-A1YW-06  
 TCGA-W3-AA21-06  
 TCGA-FW-A313-06  
 TCGA-GN-A262-06  
 TCGA-DA-A95Z-06  
 TCGA-D3-A3C6-06  
 TCGA-DA-A95W-06  
 TCGA-FS-A1ZY-06  
 TCGA-D3-A3ML-06  
 TCGA-FS-A4FB-06  
 TCGA-FR-A8YD-06



# ASAH1

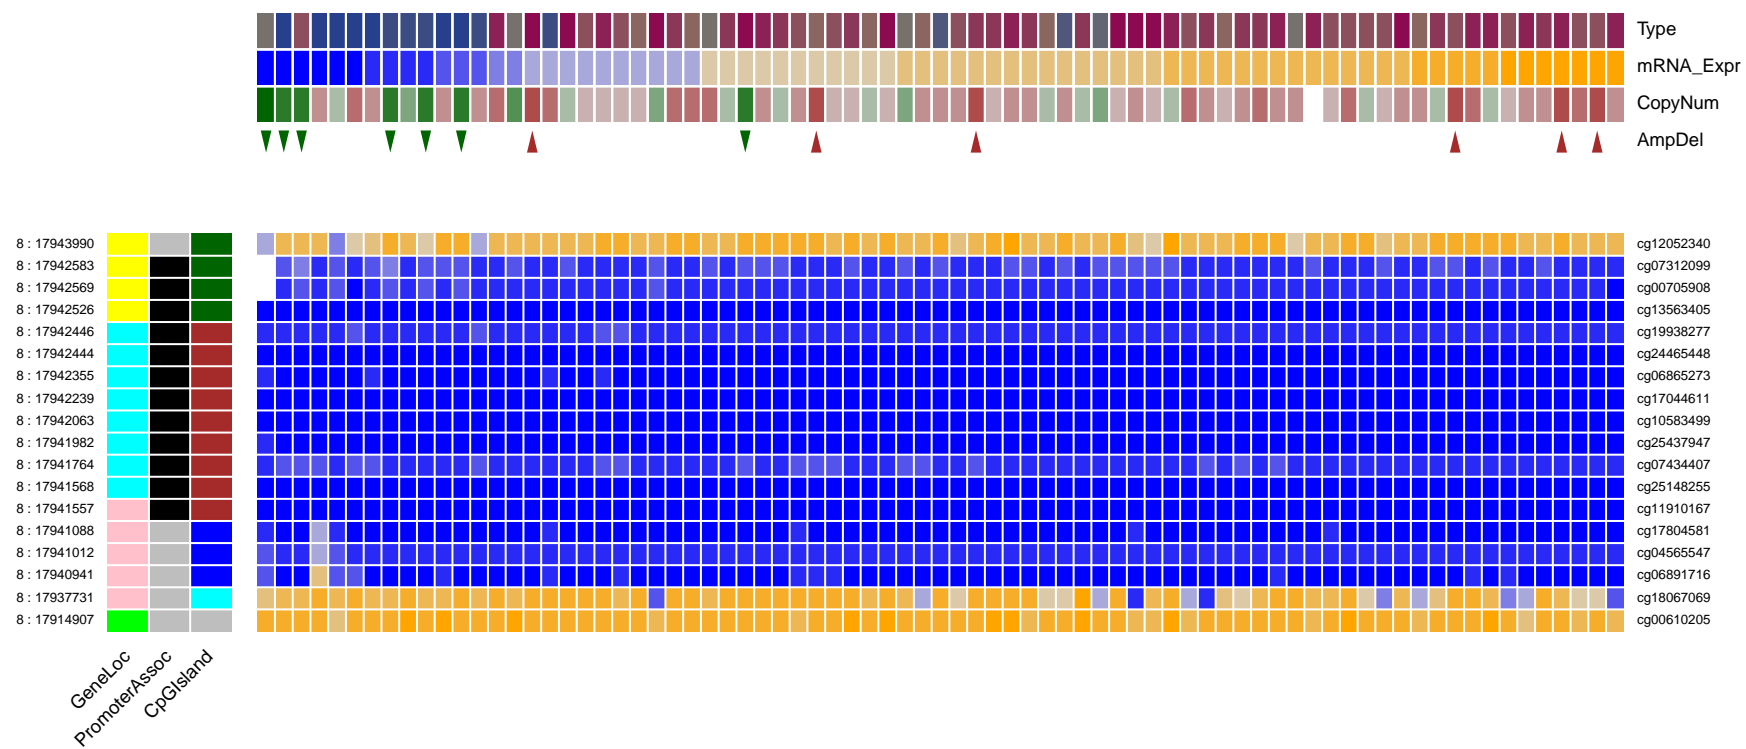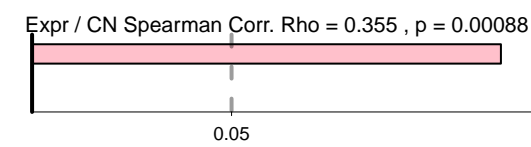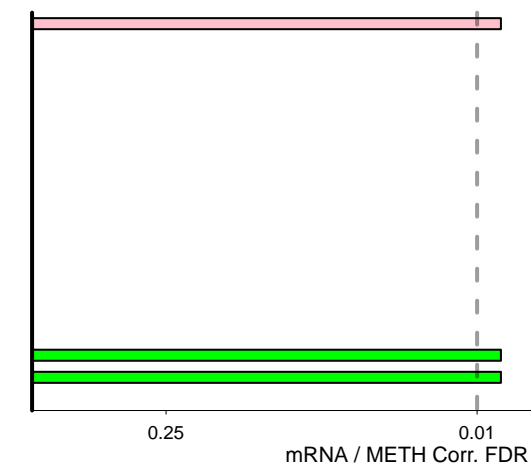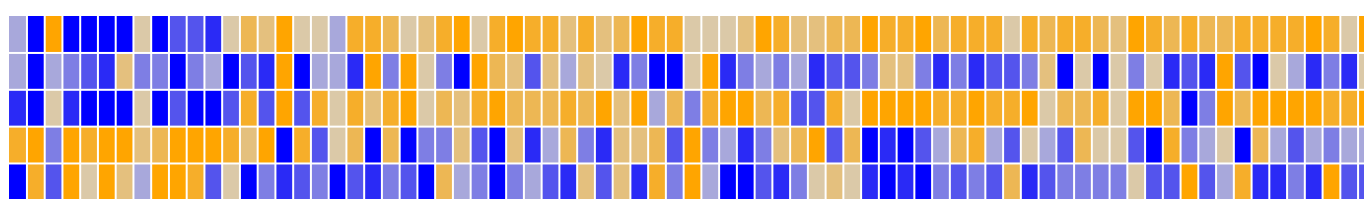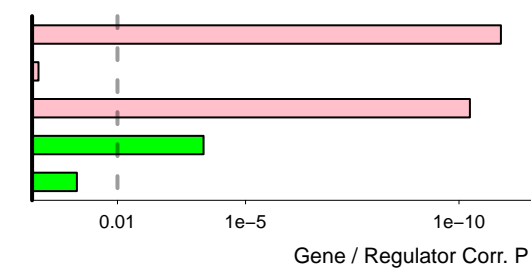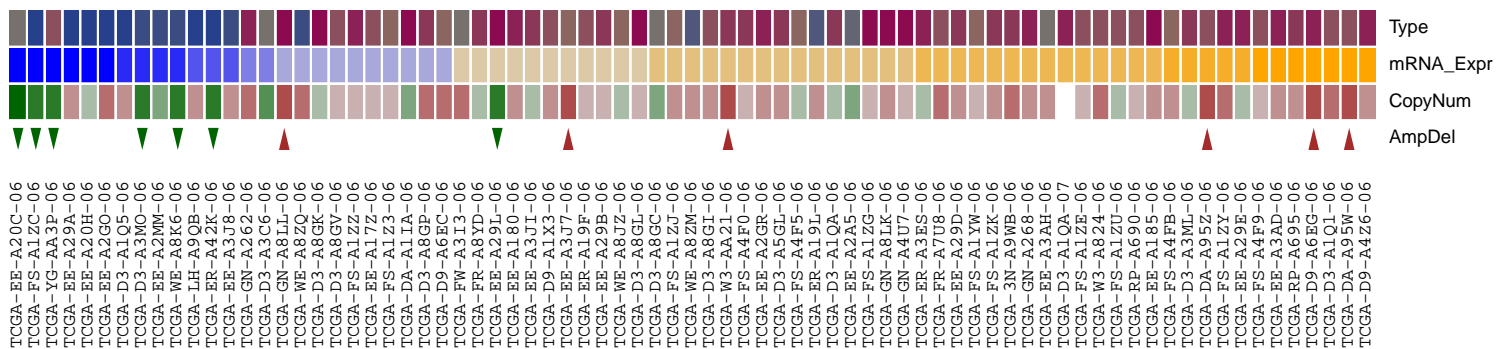

# SLC19A2

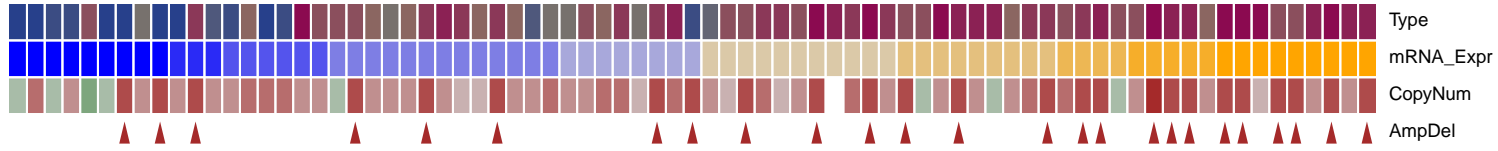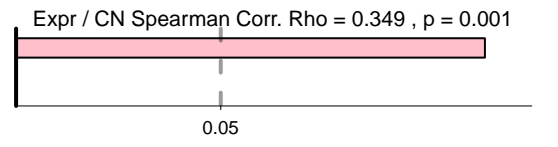

1 : 169455596  
 1 : 169455576  
 1 : 169455529  
 1 : 169455416  
 1 : 169455409  
 1 : 169455374  
 1 : 169455358  
 1 : 169455344  
 1 : 169455321  
 1 : 169455176  
 1 : 169455144  
 1 : 169455138  
 1 : 169455132  
 1 : 169455088  
 1 : 169455055  
 1 : 169454612  
 1 : 169454559  
 1 : 169453550  
 1 : 169452126  
 1 : 169433715

GeneLoc  
 PromoterAssoc  
 CpGIsland

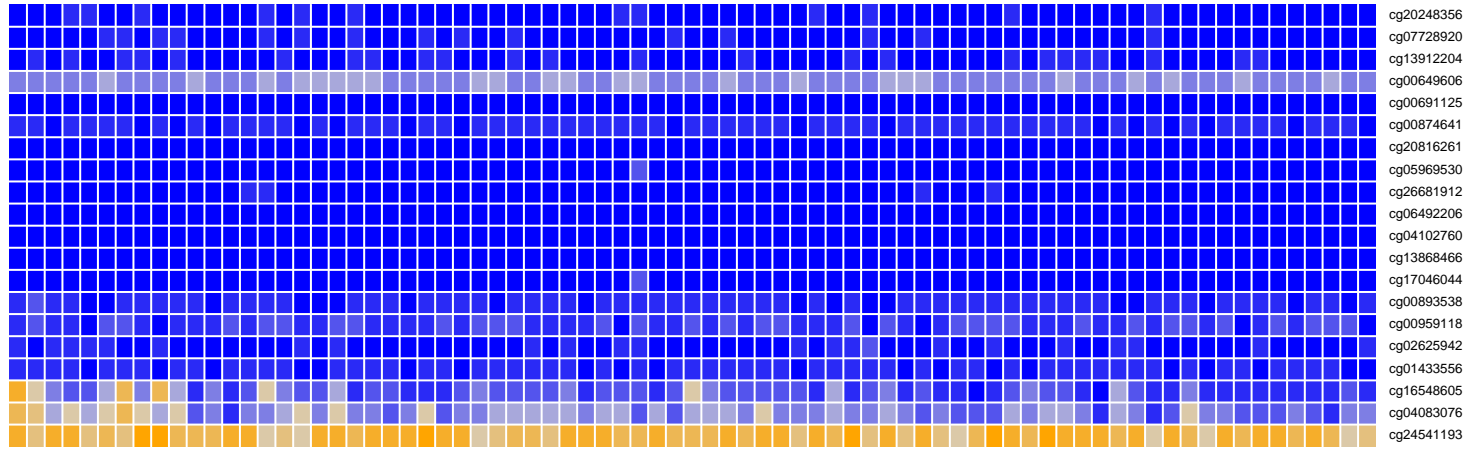

cg20248356  
 cg07728920  
 cg13912204  
 cg00649606  
 cg00691125  
 cg00874641  
 cg20816261  
 cg05969530  
 cg26681912  
 cg06492206  
 cg04102760  
 cg13868466  
 cg17046044  
 cg00893538  
 cg00959118  
 cg02625942  
 cg01433556  
 cg16548605  
 cg04083076  
 cg24541193

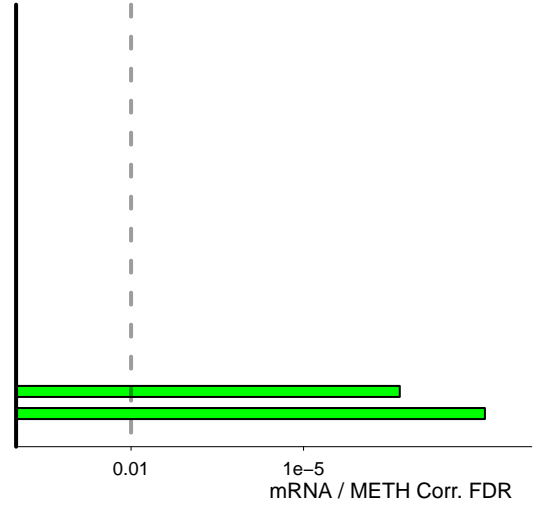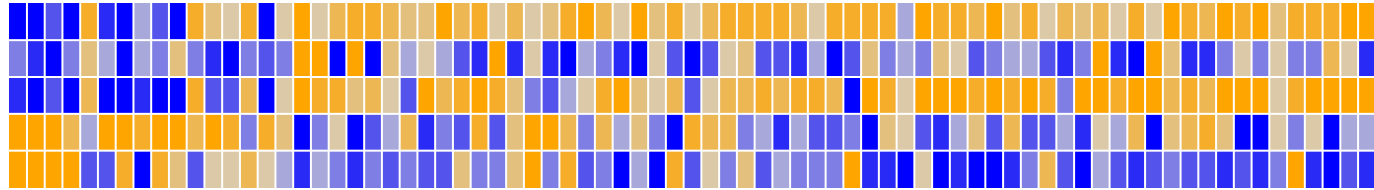

MITF  
 SOX10  
 TRPM1  
 ZEB1  
 AXL

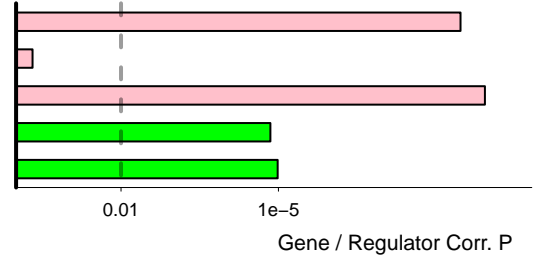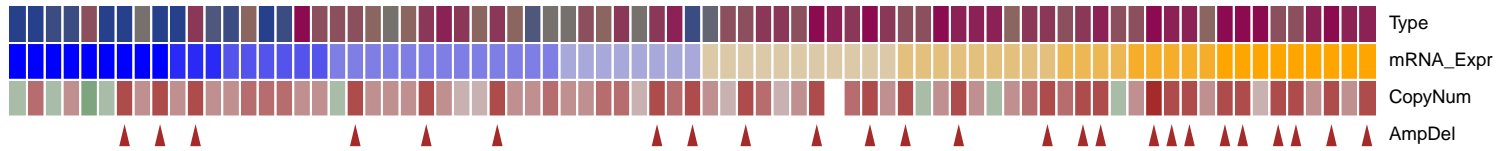

TCGA-EE-A29A-06  
 TCGA-EE-A29G-06  
 TCGA-WE-A8K6-06  
 TCGA-EE-A2MM-06  
 TCGA-D9-A1X3-06  
 TCGA-ER-A42K-06  
 TCGA-FS-A1ZC-06  
 TCGA-EE-A20C-06  
 TCGA-LH-A9OB-06  
 TCGA-D3-A1O5-06  
 TCGA-EE-A19I-06  
 TCGA-EE-A3J8-06  
 TCGA-D9-A68C-06  
 TCGA-EE-A20H-06  
 TCGA-D3-A3MO-06  
 TCGA-CN-A8JL-06  
 TCGA-D3-A8JL-06  
 TCGA-W3-A8Z4-06  
 TCGA-EE-A17Z-06  
 TCGA-FS-A1ZJ-06  
 TCGA-EE-A3AH-06  
 TCGA-FS-A4F5-06  
 TCGA-EE-A29B-06  
 TCGA-EE-A2GR-06  
 TCGA-D3-A1QA-06  
 TCGA-FS-A1YW-06  
 TCGA-FR-A8YD-06  
 TCGA-WE-A8UJ-06  
 TCGA-WE-A8ZM-06  
 TCGA-D3-A3C6-06  
 TCGA-D3-A8GC-06  
 TCGA-YG-AA3P-06  
 TCGA-FS-A1Z3-06  
 TCGA-W3-AA21-06  
 TCGA-FW-A3I3-06  
 TCGA-D3-A8GP-06  
 TCGA-EE-A29E-06  
 TCGA-WE-A8ZQ-06  
 TCGA-EE-A2A5-06  
 TCGA-FS-A1ZE-06  
 TCGA-ER-A19F-06  
 TCGA-FS-A1ZK-06  
 TCGA-EE-A3JI-06  
 TCGA-FR-A7U8-06  
 TCGA-D3-A8GK-06  
 TCGA-D3-A3ML-06  
 TCGA-CN-A4U7-06  
 TCGA-D3-A5GL-06  
 TCGA-D3-A8GV-06  
 TCGA-RP-A69J-06  
 TCGA-GN-A8LK-06  
 TCGA-EE-A3AD-06  
 TCGA-GN-A26Z-06  
 TCGA-ER-A3ES-06  
 TCGA-EE-A3J7-06  
 TCGA-RP-A695-06  
 TCGA-3N-A9WB-06  
 TCGA-DA-A95Z-06  
 TCGA-FS-A4F0-06  
 TCGA-FS-A1Z1-06  
 TCGA-DA-A95W-06  
 TCGA-FS-A4F9-06  
 TCGA-DA-A1IA-06  
 TCGA-EE-A180-06  
 TCGA-FS-A1Z2-06  
 TCGA-FS-A4FB-06  
 TCGA-D3-A8GL-06  
 TCGA-EE-A185-06  
 TCGA-FS-A1ZG-06  
 TCGA-FS-A1ZU-06  
 TCGA-D3-A1O1-06  
 TCGA-GN-A268-06  
 TCGA-EE-A29L-06  
 TCGA-D9-A4Z6-06  
 TCGA-D9-A6EG-06

Type  
 mRNA\_Expr  
 CopyNum  
 AmpDel

# LONRF1

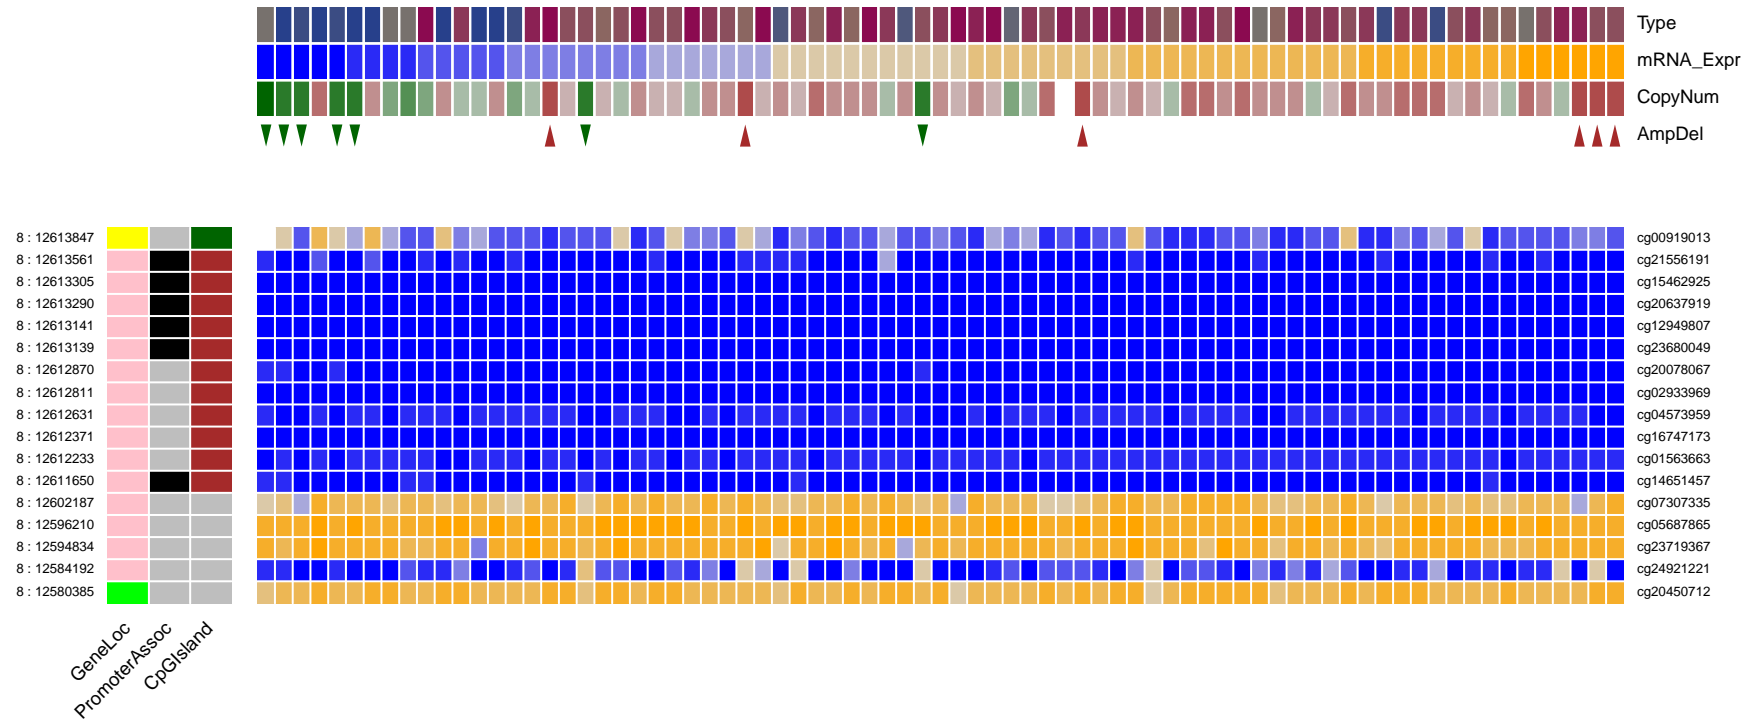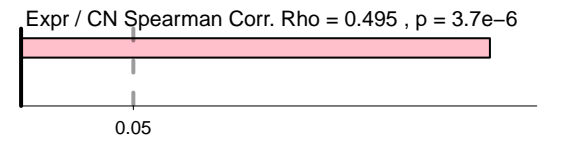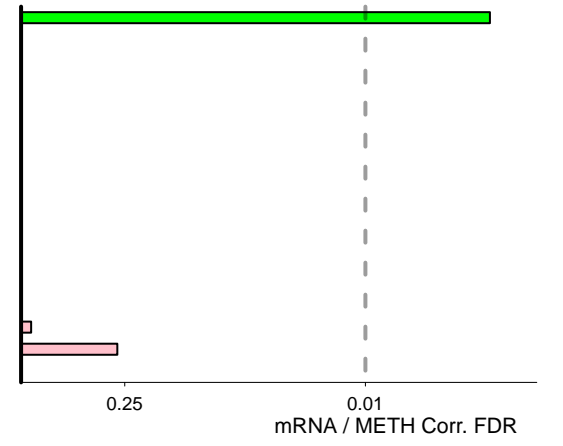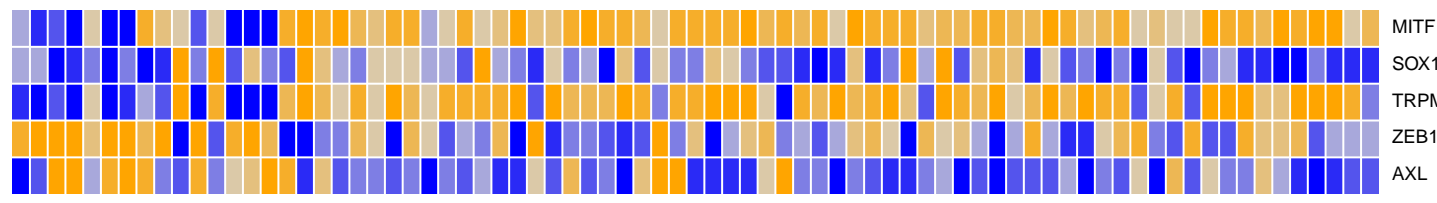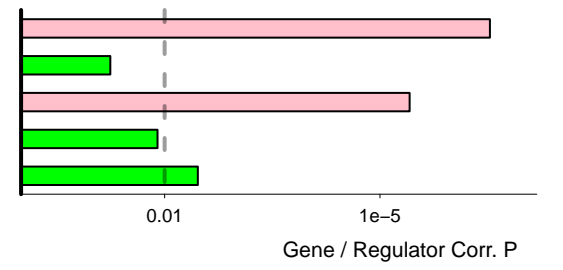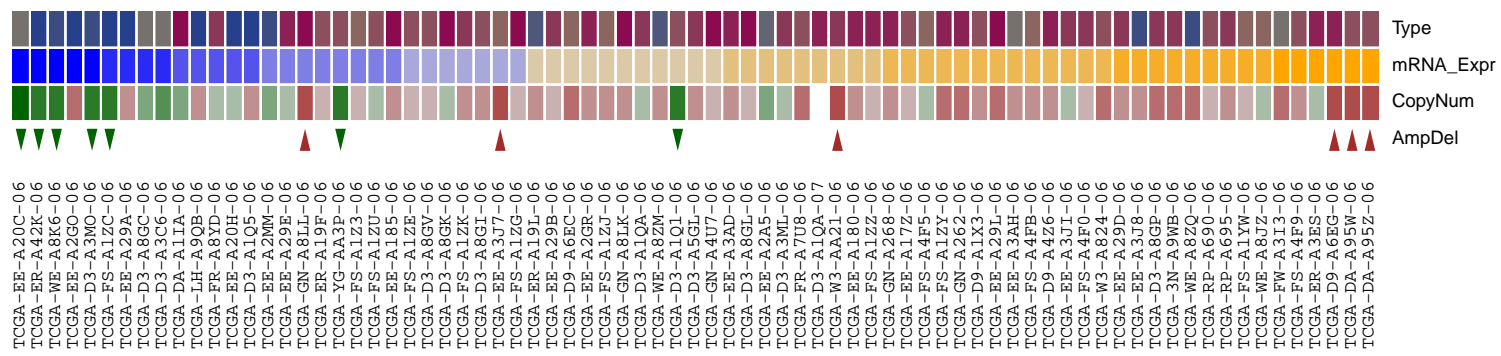

# ZFYVE16

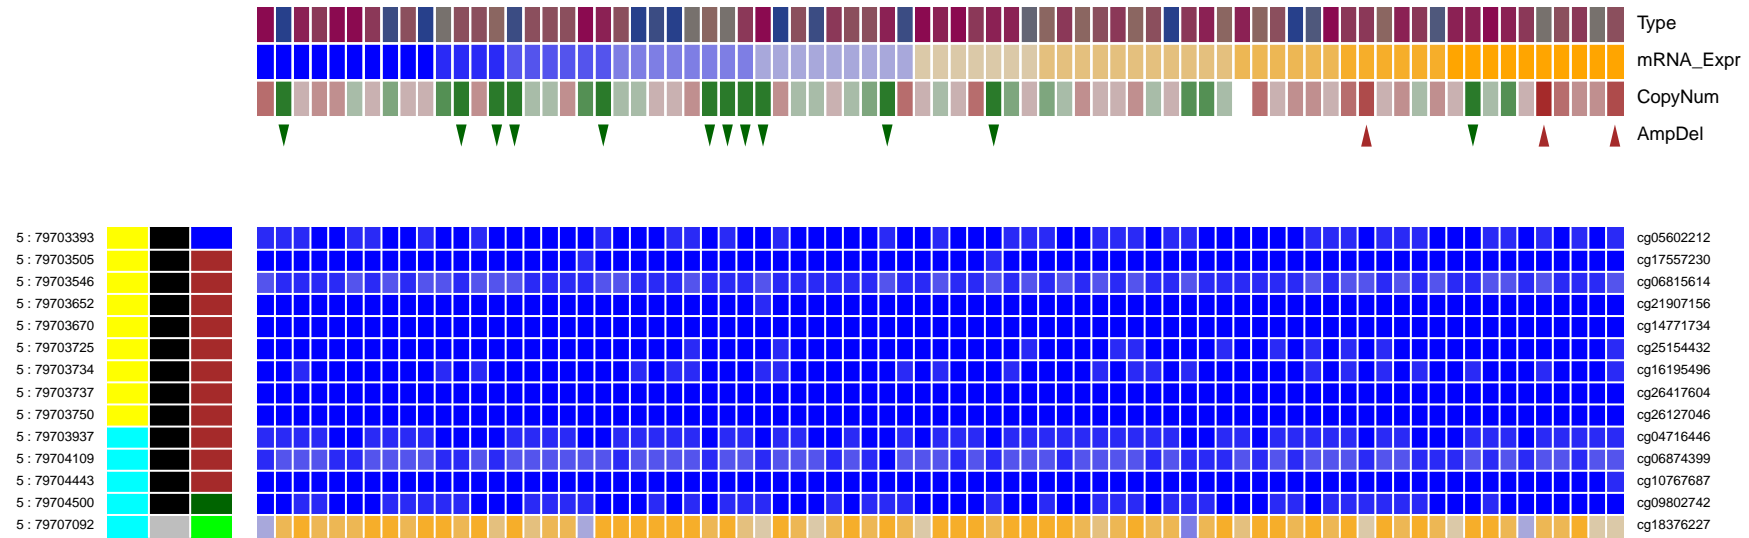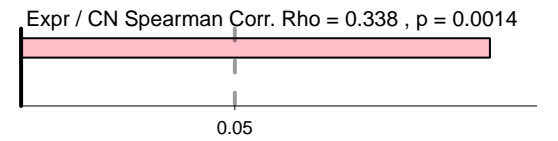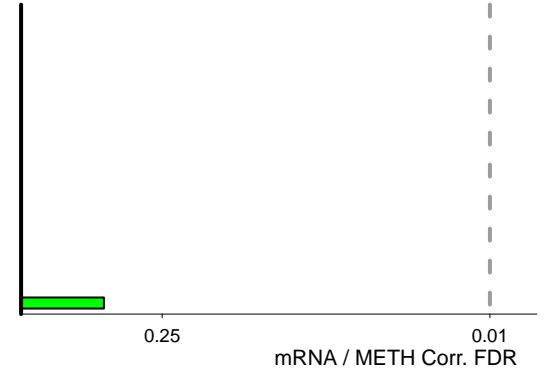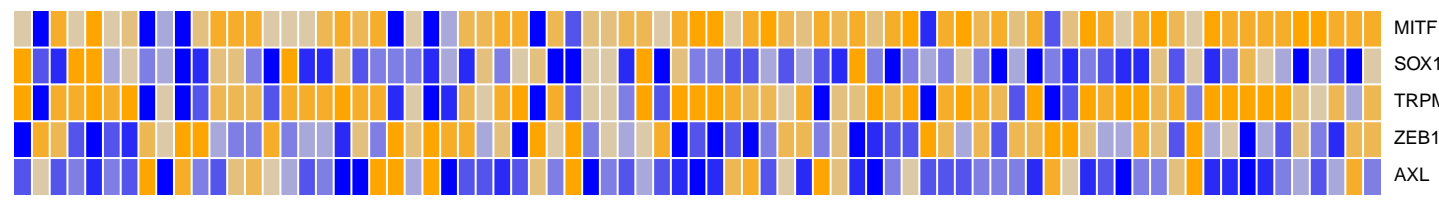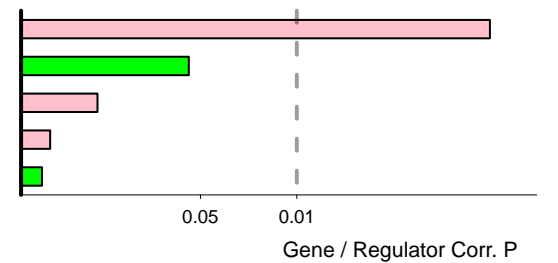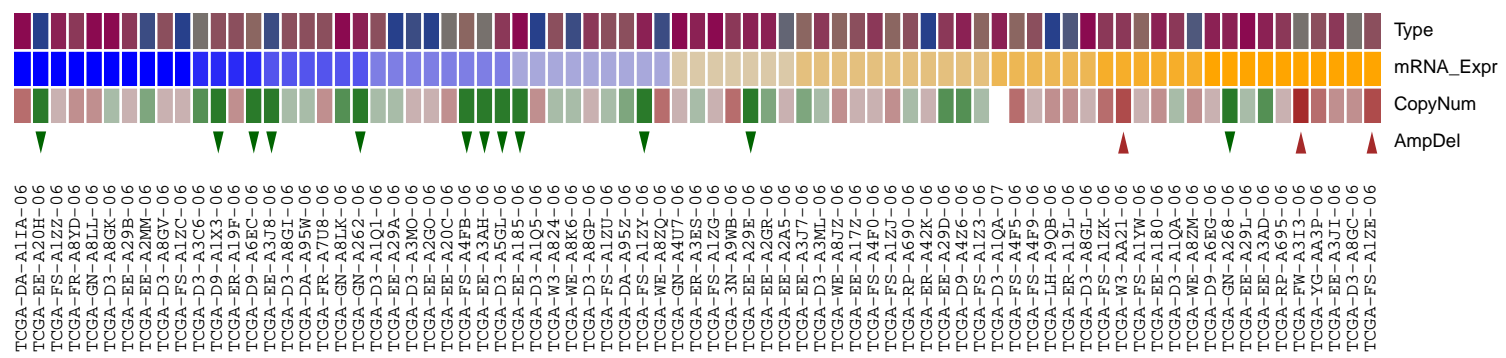

# GALNT3

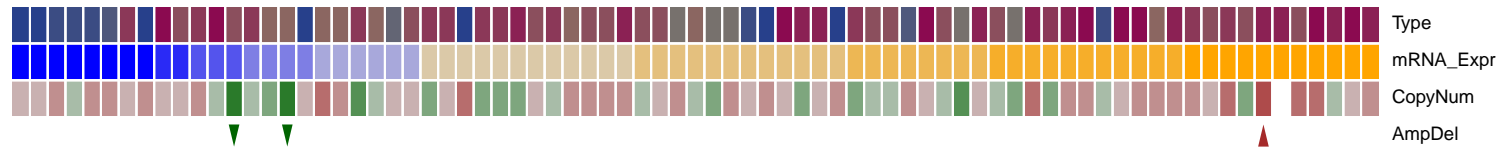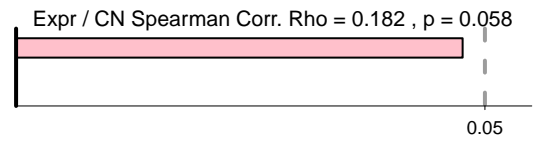

2:166651375  
2:166651320  
2:166651299  
2:166650965  
2:166650947  
2:166650933  
2:166650930  
2:166650882  
2:166650805  
2:166650769  
2:166650699  
2:166650606  
2:166649910  
2:166647794  
2:166634454  
2:166626783

GeneLoc  
PromoterAssoc  
CpGIsland

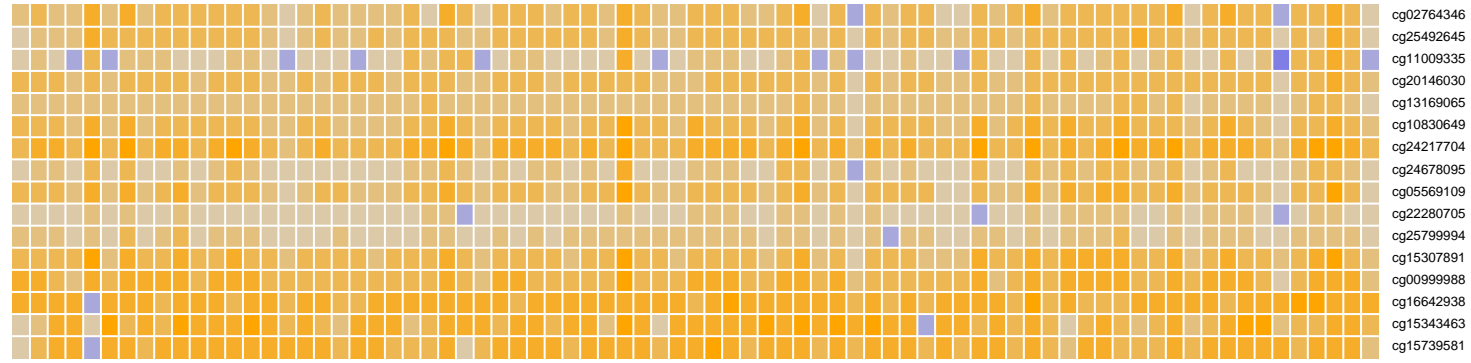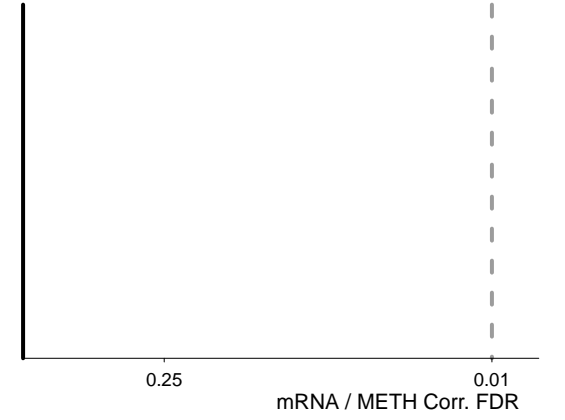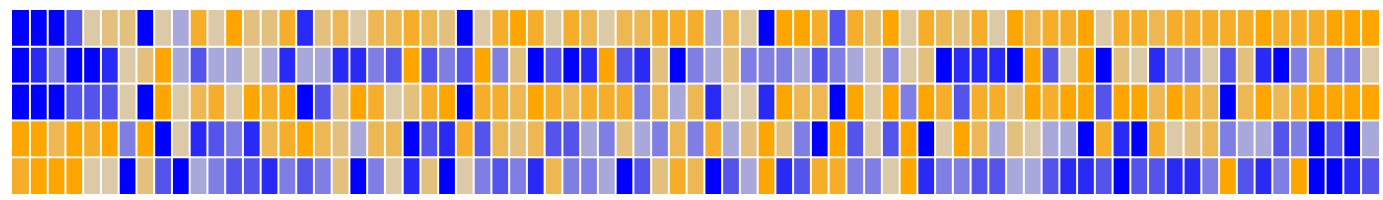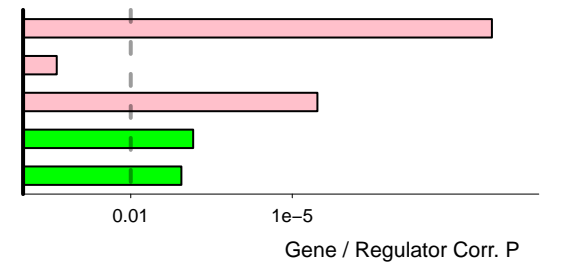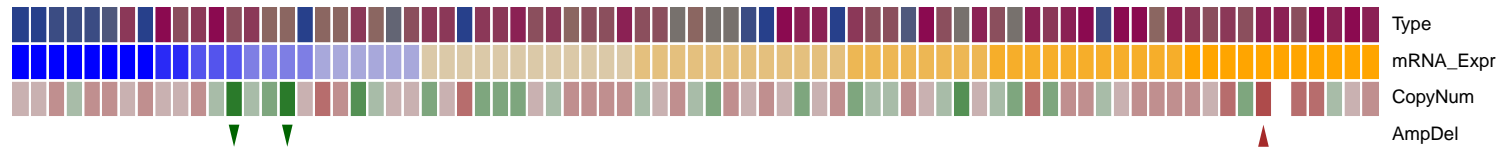

TCGA-FS-A1ZC-06  
TCGA-EE-A2GO-06  
TCGA-EE-A2MM-06  
TCGA-WE-A8K6-06  
TCGA-EE-A3J8-06  
TCGA-ER-A19L-06  
TCGA-D3-A8GP-06  
TCGA-D3-A1Q5-06  
TCGA-DA-A1IA-06  
TCGA-D3-A8GV-06  
TCGA-EE-A3JI-06  
TCGA-D3-A8GK-06  
TCGA-YG-AA3P-06  
TCGA-EE-A3J7-06  
TCGA-FS-A1YW-06  
TCGA-ER-A4ZK-06  
TCGA-FS-A4F5-06  
TCGA-WE-A8J7-06  
TCGA-W3-AA21-06  
TCGA-FS-A1Z3-06  
TCGA-EE-A2A5-06  
TCGA-EE-A17Z-06  
TCGA-D3-A1QA-06  
TCGA-FS-A4F0-06  
TCGA-EE-A20H-06  
TCGA-FR-A8XD-06  
TCGA-EE-A29D-06  
TCGA-EE-A180-06  
TCGA-FS-A4F9-06  
TCGA-3N-A9WE-06  
TCGA-FS-A1ZJ-06  
TCGA-FR-A7U8-06  
TCGA-D3-A8GI-06  
TCGA-GN-A262-06  
TCGA-DA-A95Z-06  
TCGA-ER-A19F-06  
TCGA-D3-A8GC-06  
TCGA-D9-A6EC-06  
TCGA-EE-A20C-06  
TCGA-EE-A3AH-06  
TCGA-D3-A3MO-06  
TCGA-EE-A29A-06  
TCGA-D3-A8GI-06  
TCGA-EE-A2GF-06  
TCGA-EE-A29F-06  
TCGA-LH-A90B-06  
TCGA-FS-A1ZU-06  
TCGA-PP-A695-06  
TCGA-PP-A690-06  
TCGA-WE-A8Z0-06  
TCGA-GN-A4ZM-06  
TCGA-GN-A4U7-06  
TCGA-W3-A824-06  
TCGA-D3-A3C6-06  
TCGA-FS-A1Z2-06  
TCGA-DA-A95W-06  
TCGA-FW-A3I3-06  
TCGA-FS-A1ZY-06  
TCGA-FS-A1ZK-06  
TCGA-EE-A3AD-06  
TCGA-GN-A8LL-06  
TCGA-WE-A8ZQ-06  
TCGA-GN-A8LK-06  
TCGA-EE-A185-06  
TCGA-FS-A4FB-06  
TCGA-GN-A268-06  
TCGA-D3-A5GL-06  
TCGA-FS-A1ZE-06  
TCGA-D3-A3ML-06  
TCGA-D9-A1X3-06  
TCGA-D9-A6EG-06  
TCGA-D3-A1QA-07  
TCGA-D3-A1Q1-06  
TCGA-EE-A29L-06  
TCGA-ER-A3ES-06  
TCGA-FS-A1ZG-06  
TCGA-D9-A4Z6-06

# APOE

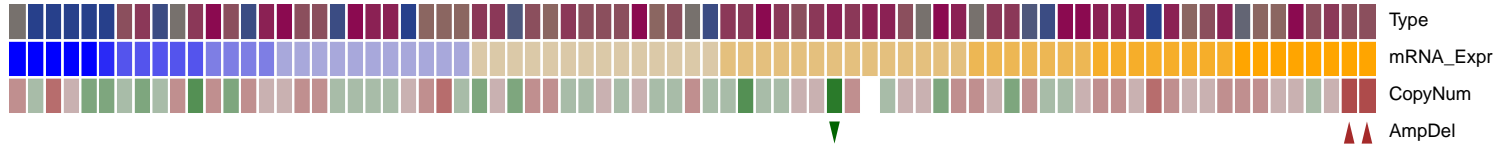

19 : 45407868  
 19 : 45408121  
 19 : 45409005  
 19 : 45409080  
 19 : 45409353  
 19 : 45409440  
 19 : 45409713  
 19 : 45409955  
 19 : 45411802  
 19 : 45411873  
 19 : 45412599  
 19 : 45412647

GeneLoc  
 PromoterAssoc  
 CpGIsland

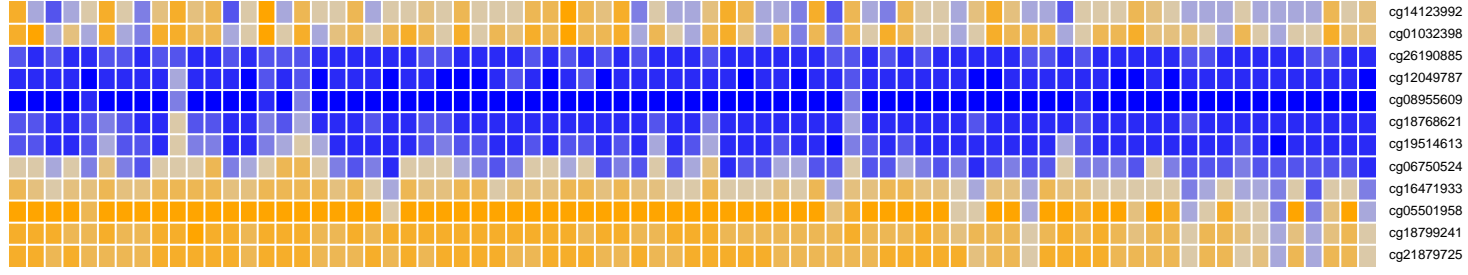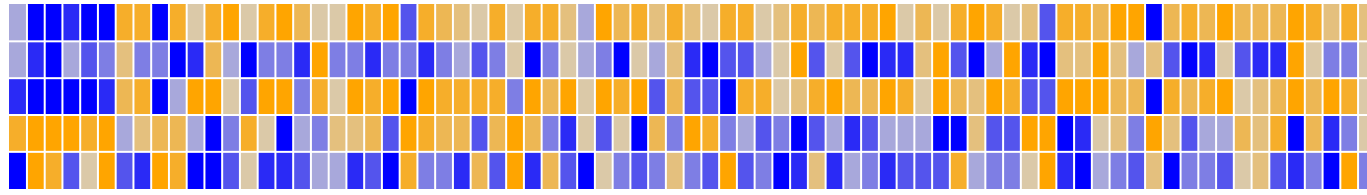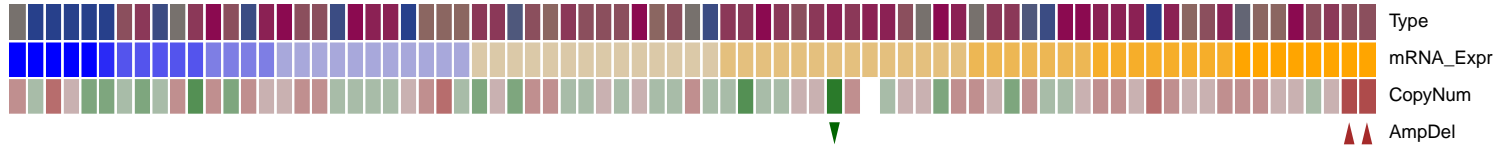

TCGA-EE-A20C-06  
 TCGA-EE-A2G0-06  
 TCGA-FS-A1ZC-06  
 TCGA-ER-A42K-06  
 TCGA-EE-A20H-06  
 TCGA-EE-A29A-06  
 TCGA-D9-A1X3-06  
 TCGA-EE-A2MN-06  
 TCGA-D3-A8GC-06  
 TCGA-W3-AA21-06  
 TCGA-EE-A291-06  
 TCGA-YG-AA3P-06  
 TCGA-EE-A3J8-06  
 TCGA-GN-A268-06  
 TCGA-DA-A95Z-06  
 TCGA-D3-A8GI-06  
 TCGA-D3-A3MO-06  
 TCGA-D3-A8GL-06  
 TCGA-FS-A1Z2-06  
 TCGA-ER-A3ES-06  
 TCGA-LH-A9QB-06  
 TCGA-FS-A1YW-06  
 TCGA-EE-A3J7-06  
 TCGA-2N-A9WB-06  
 TCGA-EE-A29D-06  
 TCGA-WE-A8ZM-06  
 TCGA-FS-A4F9-06  
 TCGA-D9-A6EC-06  
 TCGA-EE-A29B-06  
 TCGA-D3-A8GV-06  
 TCGA-RP-A690-06  
 TCGA-W3-A824-06  
 TCGA-EE-A185-06  
 TCGA-FS-A4F5-06  
 TCGA-ER-A19F-06  
 TCGA-D3-A3C6-06  
 TCGA-WE-A8Z0-06  
 TCGA-D3-A3M1-06  
 TCGA-FS-A1ZK-06  
 TCGA-D3-A8GK-06  
 TCGA-D3-A8GP-06  
 TCGA-EE-A172-06  
 TCGA-D3-A1QA-06  
 TCGA-EE-A3AD-06  
 TCGA-EE-A3J1-06  
 TCGA-D3-A1QA-07  
 TCGA-D9-A6EG-06  
 TCGA-DA-A95W-06  
 TCGA-EE-A3AH-06  
 TCGA-DA-A1IA-06  
 TCGA-EE-A29E-06  
 TCGA-FW-A313-06  
 TCGA-RP-A695-06  
 TCGA-ER-A8YD-06  
 TCGA-ER-A19L-06  
 TCGA-WE-A8K6-06  
 TCGA-GN-A4U7-06  
 TCGA-GN-A8LK-06  
 TCGA-FS-A1ZY-06  
 TCGA-EE-A180-06  
 TCGA-EE-A2GR-06  
 TCGA-D3-A1Q5-06  
 TCGA-GN-A262-06  
 TCGA-FS-A1ZJ-06  
 TCGA-FR-A7U8-06  
 TCGA-D9-A4Z6-06  
 TCGA-EE-A2A5-06  
 TCGA-WE-A8JZ-06  
 TCGA-FS-A4FB-06  
 TCGA-GN-A8LI-06  
 TCGA-FS-A1ZE-06  
 TCGA-FS-A4F0-06  
 TCGA-D3-A1O1-06  
 TCGA-FS-A1ZU-06

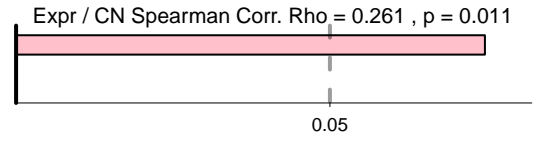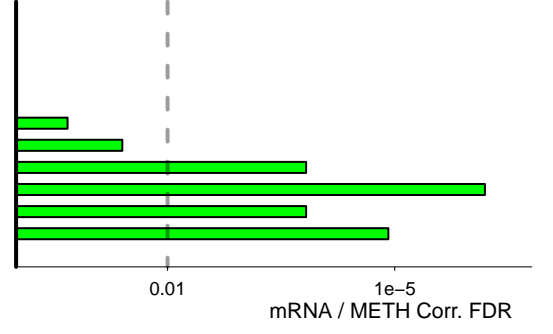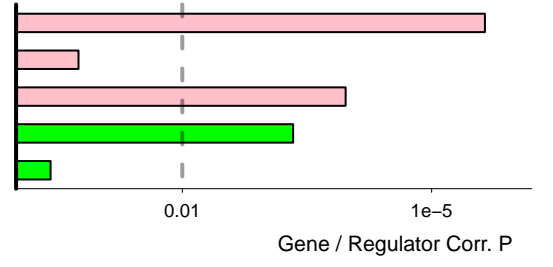

# IL6R

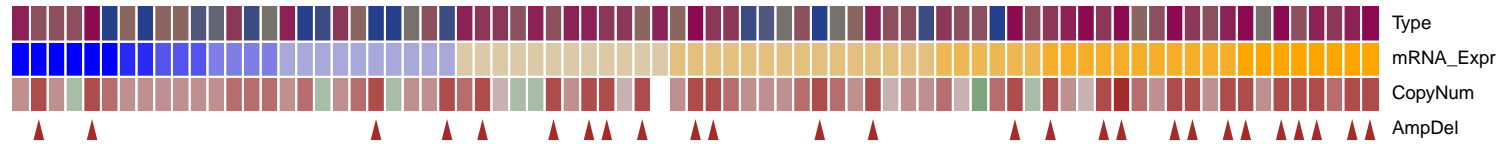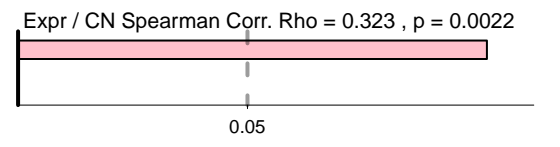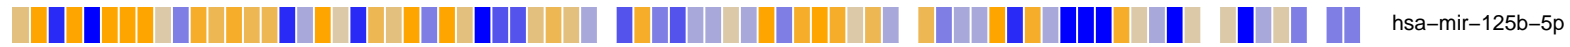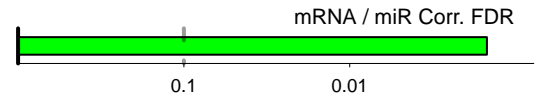

1 : 154376344  
 1 : 154377091  
 1 : 154377364  
 1 : 154377532  
 1 : 154377621  
 1 : 154377807  
 1 : 154377809  
 1 : 154377970  
 1 : 154377987  
 1 : 154378330  
 1 : 154378444  
 1 : 154379696  
 1 : 154380179  
 1 : 154380705  
 1 : 154392070  
 1 : 154402922  
 1 : 154415062  
 1 : 154425845  
 1 : 154435948  
 1 : 154437693  
 1 : 154438143  
 1 : 154439516

GeneLoc  
 PromoterAssoc  
 CpGIsland

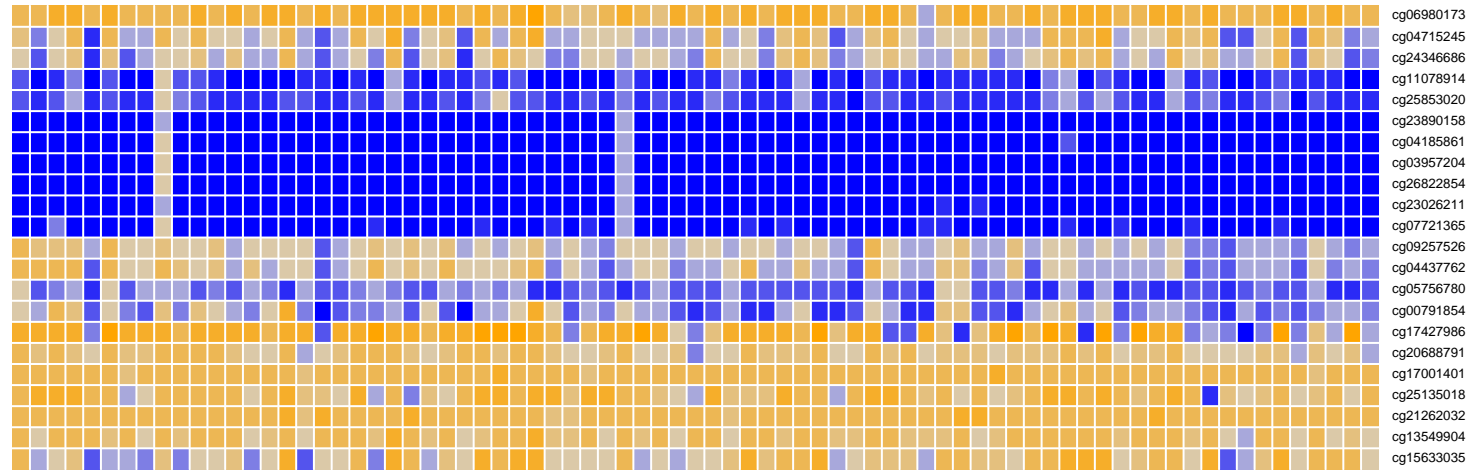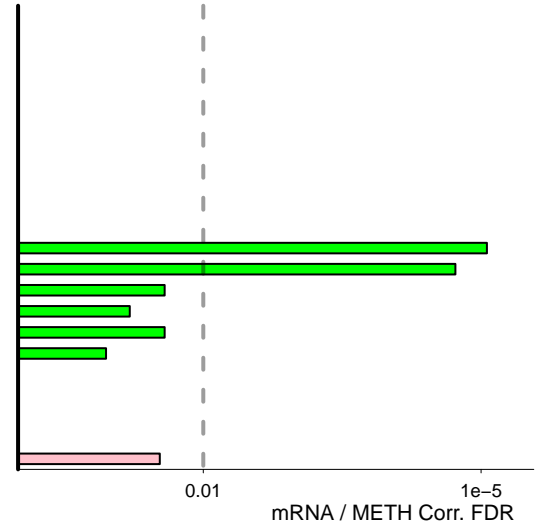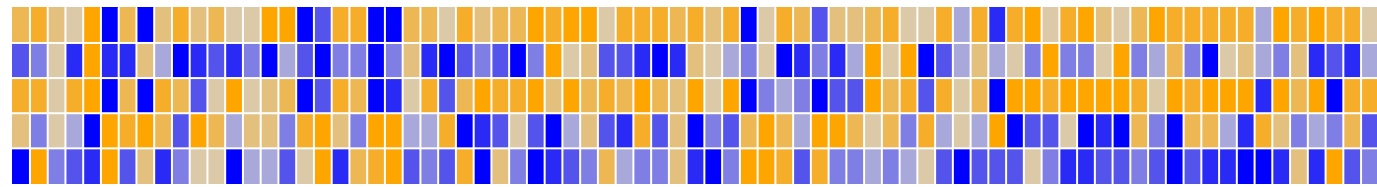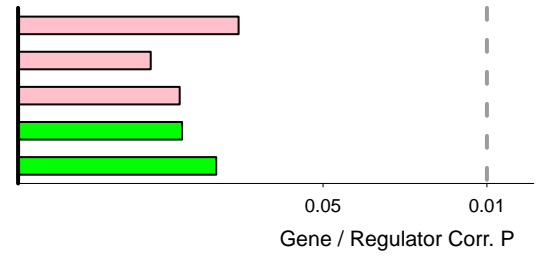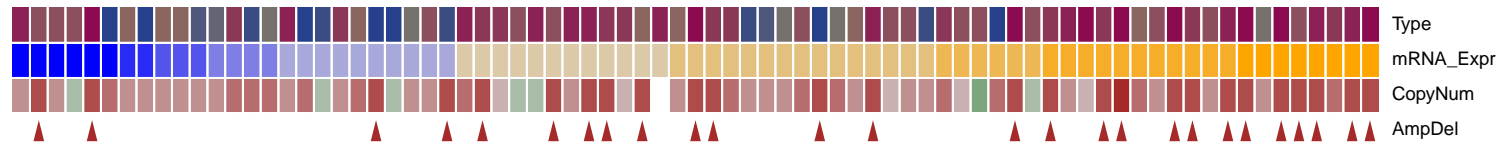

TCGA-GN-A262-06  
 TCGA-D3-A1Q1-06  
 TCGA-FS-A1ZU-06  
 TCGA-DA-A95W-06  
 TCGA-GN-A8LL-06  
 TCGA-EE-A2GO-06  
 TCGA-FS-A4FB-06  
 TCGA-D3-A1O5-06  
 TCGA-EE-A3J7-06  
 TCGA-FS-A1ZJ-06  
 TCGA-ER-A19L-06  
 TCGA-EE-A2A5-06  
 TCGA-ER-A421-06  
 TCGA-D3-A3MO-06  
 TCGA-FW-A3I3-06  
 TCGA-EE-A2GR-06  
 TCGA-EE-A2OH-06  
 TCGA-WE-A8KG-06  
 TCGA-D3-A5GL-06  
 TCGA-D9-A6EC-06  
 TCGA-FS-A1ZC-06  
 TCGA-EE-A29A-06  
 TCGA-EE-A3AH-06  
 TCGA-FR-A7U8-06  
 TCGA-WE-A8ZQ-06  
 TCGA-EE-A29E-06  
 TCGA-FS-A4F0-06  
 TCGA-D3-A1QA-06  
 TCGA-W3-A824-06  
 TCGA-ER-A3ES-06  
 TCGA-EE-A17Z-06  
 TCGA-D9-A4Z6-06  
 TCGA-EE-A180-06  
 TCGA-3N-A9WB-06  
 TCGA-EE-A3JI-06  
 TCGA-FS-A1YW-06  
 TCGA-D3-A1QA-07  
 TCGA-WE-A8JZ-06  
 TCGA-GN-A4U7-06  
 TCGA-D3-A8GP-06  
 TCGA-RP-A695-06  
 TCGA-EE-A2MM-06  
 TCGA-WE-A8ZM-06  
 TCGA-D3-A8GC-06  
 TCGA-DA-A95Z-06  
 TCGA-LH-A9OB-06  
 TCGA-D3-A3C6-06  
 TCGA-FS-A4F5-06  
 TCGA-FS-A1ZY-06  
 TCGA-FS-A1ZE-06  
 TCGA-D3-A6GI-06  
 TCGA-EE-A3J8-06  
 TCGA-FS-A1ZK-06  
 TCGA-D3-A6GV-06  
 TCGA-D9-A1X3-06  
 TCGA-ER-A4ZK-06  
 TCGA-EE-A185-06  
 TCGA-RP-A690-06  
 TCGA-FR-A8YD-06  
 TCGA-GN-A268-06  
 TCGA-FS-A1ZG-06  
 TCGA-EE-A29B-06  
 TCGA-DA-A1IA-06  
 TCGA-FS-A1Z3-06  
 TCGA-YG-AA3P-06  
 TCGA-EE-A29L-06  
 TCGA-EE-A29D-06  
 TCGA-FS-A4F9-06  
 TCGA-EE-A3AD-06  
 TCGA-GN-A8LK-06  
 TCGA-EE-A20C-06  
 TCGA-D3-A8GL-06  
 TCGA-ER-A19F-06  
 TCGA-D9-A6EG-06  
 TCGA-D3-A3ML-06  
 TCGA-FS-A1ZZ-06  
 TCGA-D3-A8GK-06

# HES6

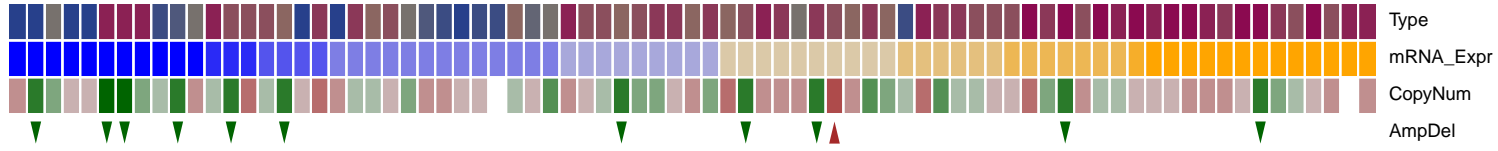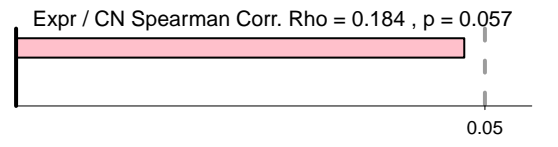

2 : 239149937  
 2 : 239149859  
 2 : 239149142  
 2 : 239149084  
 2 : 239148849  
 2 : 239148697  
 2 : 239148674  
 2 : 239148619  
 2 : 239148132  
 2 : 239147605  
 2 : 239147445

GeneLoc  
 PromoterAssoc  
 CpGIsland

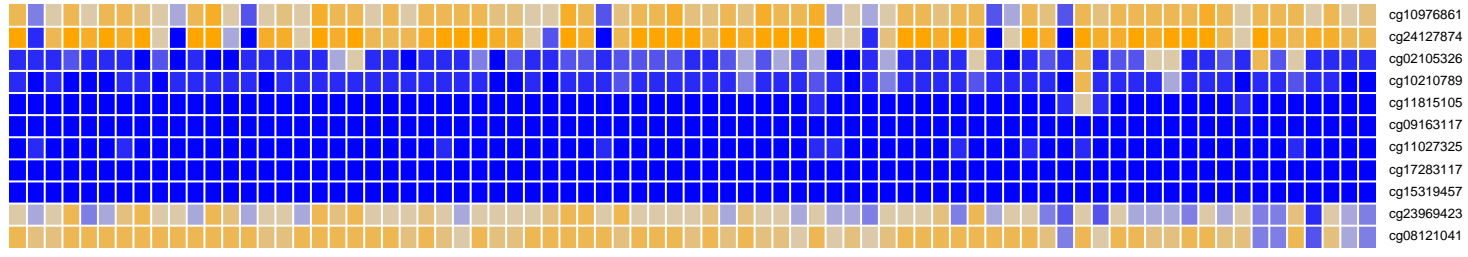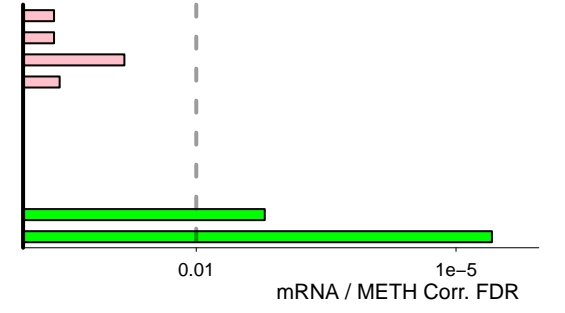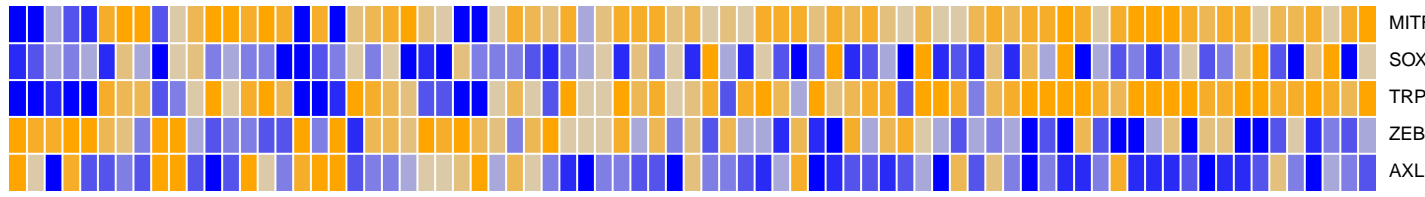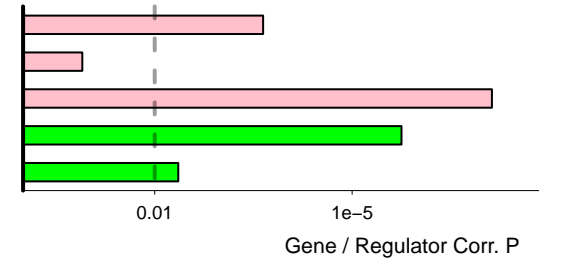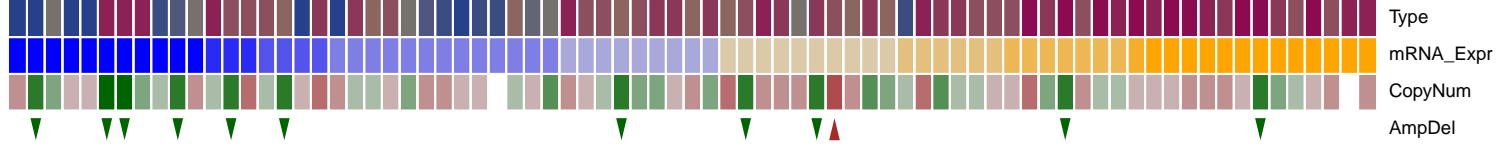

TCGA-EE-A2GO-06  
 TCGA-EE-A2OH-06  
 TCGA-EE-A2OC-06  
 TCGA-LH-A9QB-06  
 TCGA-ER-A42K-06  
 TCGA-FS-A1ZZ-06  
 TCGA-EE-A180-06  
 TCGA-EE-A2GR-06  
 TCGA-WE-A8K6-06  
 TCGA-WE-A8ZM-06  
 TCGA-EE-A3AH-06  
 TCGA-ER-A3ES-06  
 TCGA-YG-A83P-06  
 TCGA-D3-A1O1-06  
 TCGA-RP-A690-06  
 TCGA-FS-A1ZJ-06  
 TCGA-FS-A1ZC-06  
 TCGA-D3-A3ML-06  
 TCGA-EE-A29A-06  
 TCGA-EE-A29B-06  
 TCGA-FS-A1Z3-06  
 TCGA-FS-A1ZE-06  
 TCGA-FW-A313-06  
 TCGA-ER-A19L-06  
 TCGA-EE-A3U8-06  
 TCGA-D3-A1O5-06  
 TCGA-EE-A2MM-06  
 TCGA-D3-A3MO-06  
 TCGA-D9-A6EC-06  
 TCGA-EE-A2A5-06  
 TCGA-D3-A3C6-06  
 TCGA-GN-A268-06  
 TCGA-D3-A8GV-06  
 TCGA-FS-A1YU-06  
 TCGA-FS-A1YX-06  
 TCGA-EE-A29D-06  
 TCGA-D3-A8GP-06  
 TCGA-WE-A8JZ-06  
 TCGA-FR-A8YD-06  
 TCGA-FS-A4F5-06  
 TCGA-DA-A95W-06  
 TCGA-EE-A3AD-06  
 TCGA-EE-A3TI-06  
 TCGA-D3-A8GC-06  
 TCGA-FS-A4F0-06  
 TCGA-EE-A17Z-06  
 TCGA-FS-A4FB-06  
 TCGA-FS-A1ZK-06  
 TCGA-EE-A3T7-06  
 TCGA-WE-A8ZO-06  
 TCGA-FS-A1ZY-06  
 TCGA-W3-A8ZL-06  
 TCGA-3N-A8WB-06  
 TCGA-DA-A95Z-06  
 TCGA-ER-A19F-06  
 TCGA-FR-A7U8-06  
 TCGA-EE-A29L-06  
 TCGA-RP-A695-06  
 TCGA-GN-A8LL-06  
 TCGA-FS-A4F9-06  
 TCGA-D3-A8GK-06  
 TCGA-EE-A29E-06  
 TCGA-FS-A1ZG-06  
 TCGA-D9-A6EG-06  
 TCGA-D3-A8GL-06  
 TCGA-EE-A185-06  
 TCGA-GN-A262-06  
 TCGA-D3-A5GL-06  
 TCGA-GN-A4U7-06  
 TCGA-DA-A1IA-06  
 TCGA-D3-A1OA-06  
 TCGA-W3-A824-06  
 TCGA-GN-A8LK-06  
 TCGA-D3-A8GI-06  
 TCGA-D3-A1OA-07  
 TCGA-D9-A4Z6-06



# HPS4

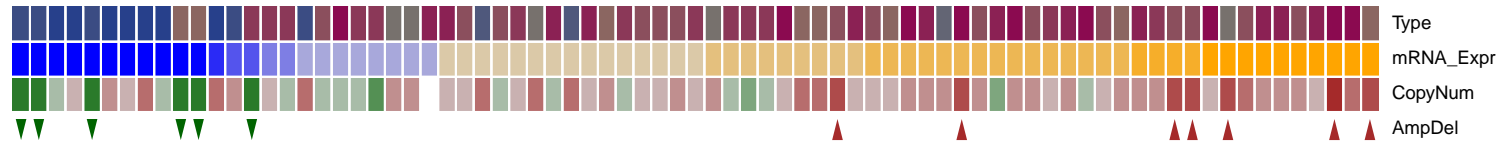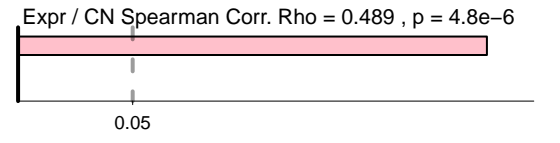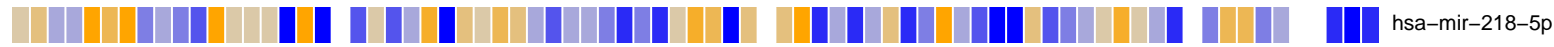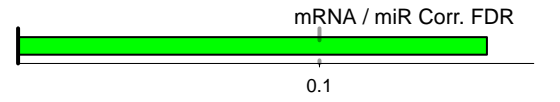

22 : 26881231  
 22 : 26881026  
 22 : 26879736  
 22 : 26879734  
 22 : 26879726  
 22 : 26879714  
 22 : 26879672  
 22 : 26879615  
 22 : 26879581  
 22 : 26879473  
 22 : 26877690  
 22 : 26876075  
 22 : 26875823  
 22 : 26875806  
 22 : 26875652  
 22 : 26875563  
 22 : 26875552  
 22 : 26875499  
 22 : 26857165  
 22 : 26848288

GeneLoc  
 PromoterAssoc  
 CpGIsland

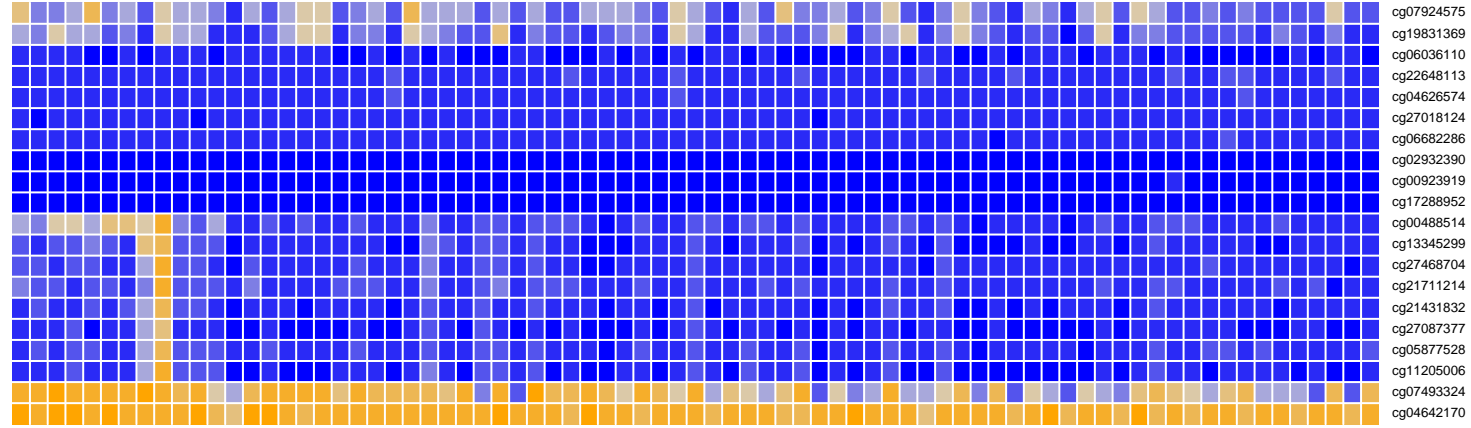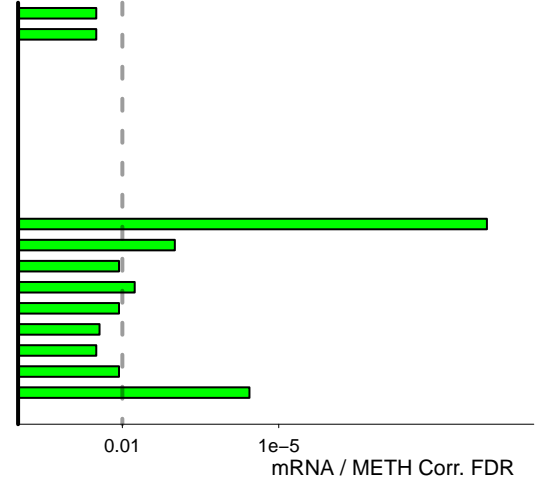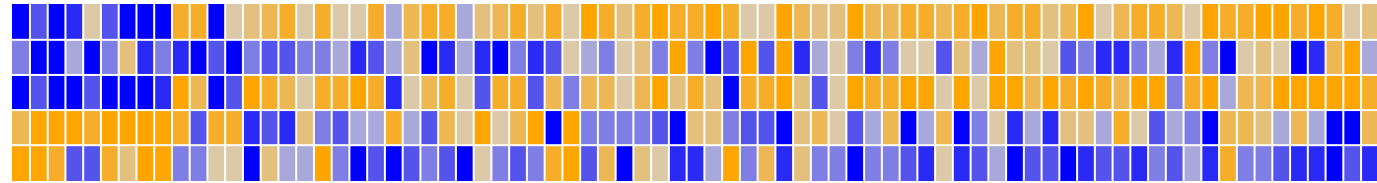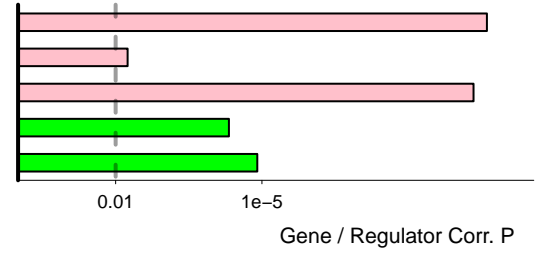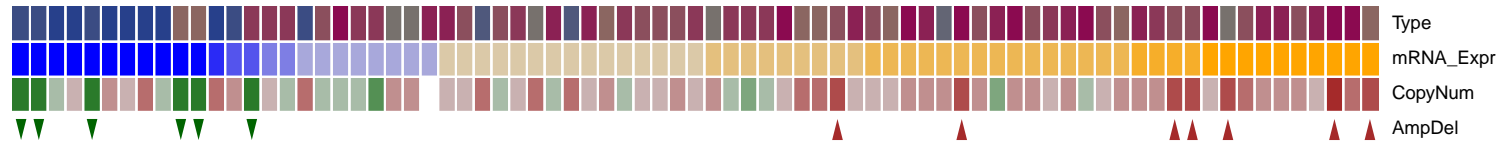

TCGA-EE-A2MM-06  
 TCGA-WE-A8K6-06  
 TCGA-FS-A1ZC-06  
 TCGA-ER-A42K-06  
 TCGA-WE-A8ZQ-06  
 TCGA-LH-A90B-06  
 TCGA-D3-A1O5-06  
 TCGA-EE-A26O-06  
 TCGA-FS-A1YW-06  
 TCGA-FS-A1ZJ-06  
 TCGA-EE-A20H-06  
 TCGA-EE-A3J8-06  
 TCGA-FS-A4R0-06  
 TCGA-D3-A1OA-06  
 TCGA-EE-A3J1-06  
 TCGA-D3-A3MO-06  
 TCGA-D3-A1Q1-06  
 TCGA-D3-A8GK-06  
 TCGA-W3-AAZ1-06  
 TCGA-FS-A1ZK-06  
 TCGA-EE-A20C-06  
 TCGA-EE-A3AH-06  
 TCGA-D3-A1OA-07  
 TCGA-FS-A1ZZ-06  
 TCGA-ER-A19L-06  
 TCGA-W3-A824-06  
 TCGA-EE-A29D-06  
 TCGA-D3-A3C6-06  
 TCGA-EE-A29E-06  
 TCGA-WE-A8ZM-06  
 TCGA-EE-A2GR-06  
 TCGA-D9-A6EC-06  
 TCGA-ER-A19F-06  
 TCGA-RP-A690-06  
 TCGA-EE-A17Z-06  
 TCGA-D3-A5GL-06  
 TCGA-FW-A3I3-06  
 TCGA-D3-A3ML-06  
 TCGA-PR-A8YD-06  
 TCGA-3N-A9WB-06  
 TCGA-WE-A8LJ-06  
 TCGA-WE-A8JZ-06  
 TCGA-FS-A4F5-06  
 TCGA-ER-A3S8-06  
 TCGA-PR-A7H8-06  
 TCGA-FS-A1Z3-06  
 TCGA-EE-A185-06  
 TCGA-EE-A3AD-06  
 TCGA-EE-A2A5-06  
 TCGA-GN-A4U7-06  
 TCGA-FG-AA3P-06  
 TCGA-FS-A1Z1-06  
 TCGA-GN-A8LK-06  
 TCGA-D9-A1X3-06  
 TCGA-EE-A29B-06  
 TCGA-GN-A262-06  
 TCGA-D3-A8GL-06  
 TCGA-DA-A95W-06  
 TCGA-FS-A4FB-06  
 TCGA-GN-A268-06  
 TCGA-RP-A695-06  
 TCGA-DA-A95Z-06  
 TCGA-D3-A8G1-06  
 TCGA-FS-A1ZG-06  
 TCGA-D3-A8GC-06  
 TCGA-FS-A1ZE-06  
 TCGA-EE-A180-06  
 TCGA-D9-A4Z6-06  
 TCGA-FS-A4F9-06  
 TCGA-D9-A6EG-06  
 TCGA-EE-A29L-06  
 TCGA-DA-A1IA-06  
 TCGA-EE-A3J7-06

# PHACTR1

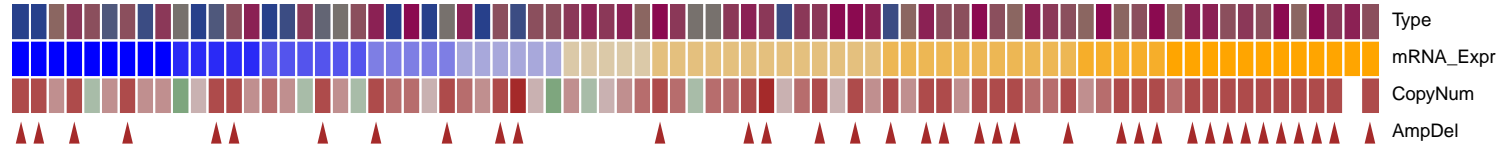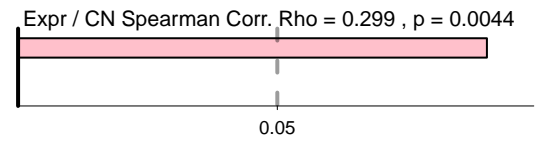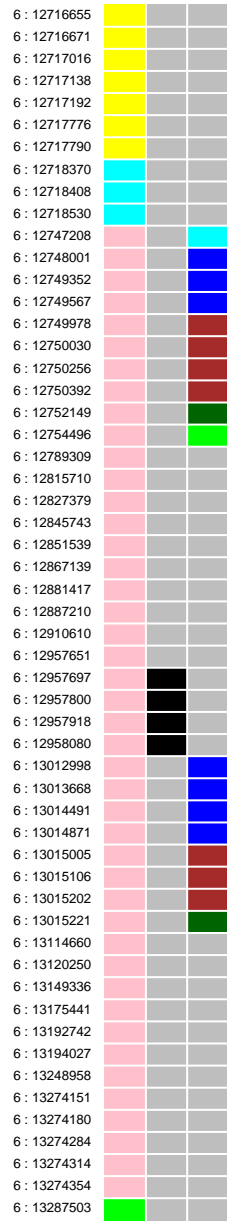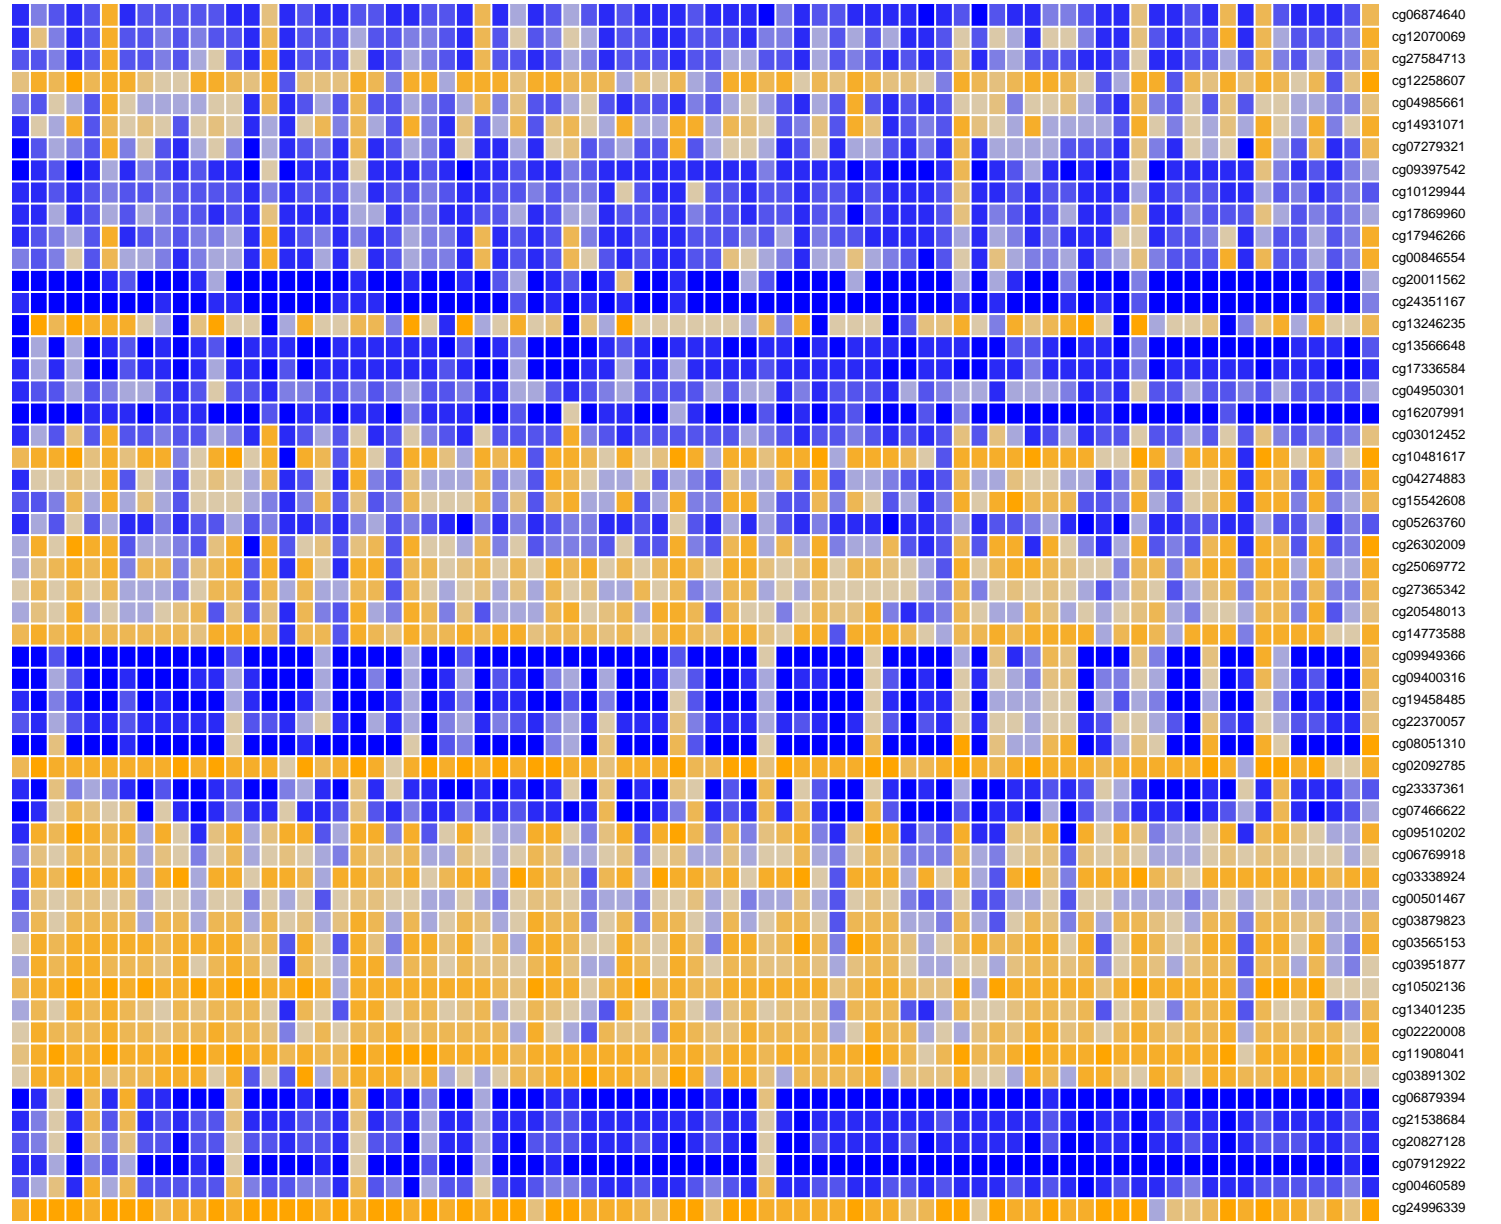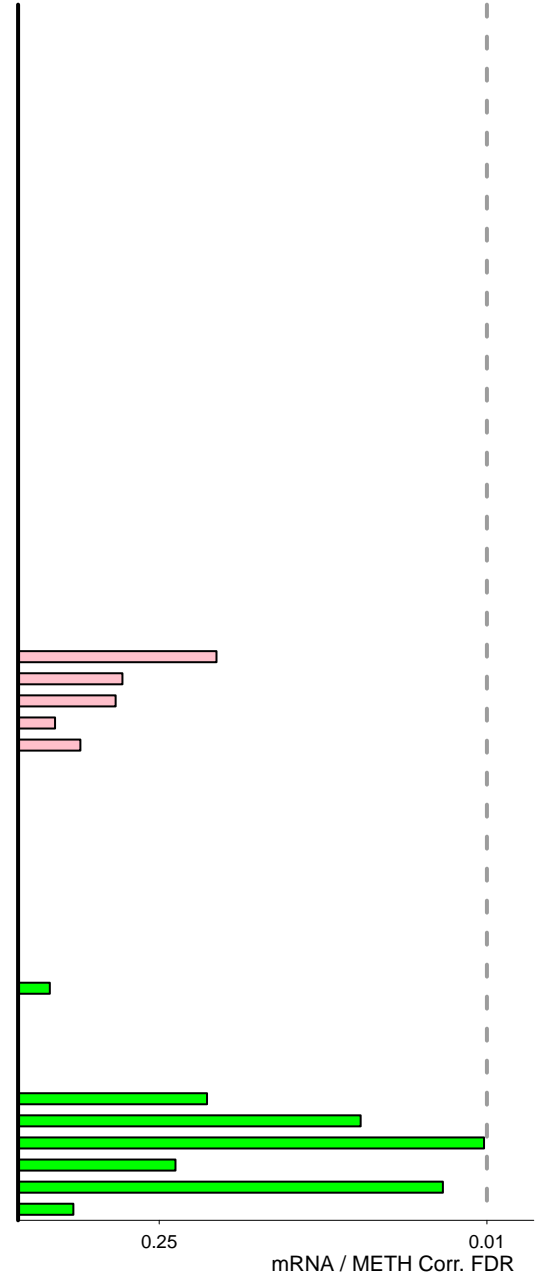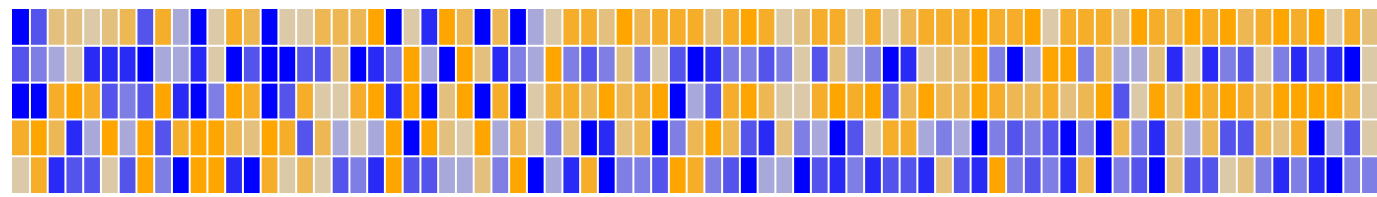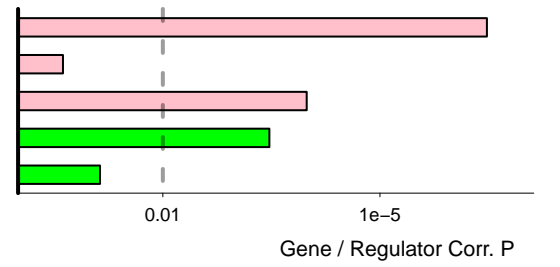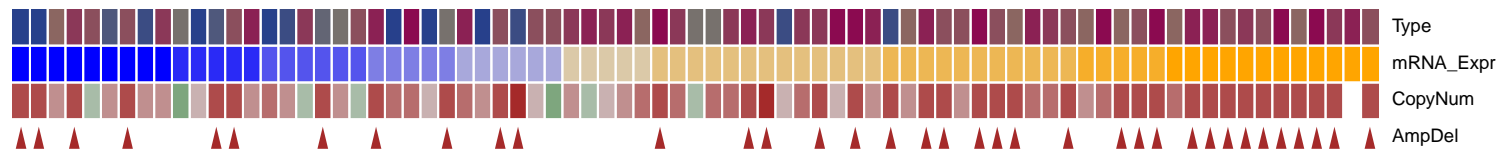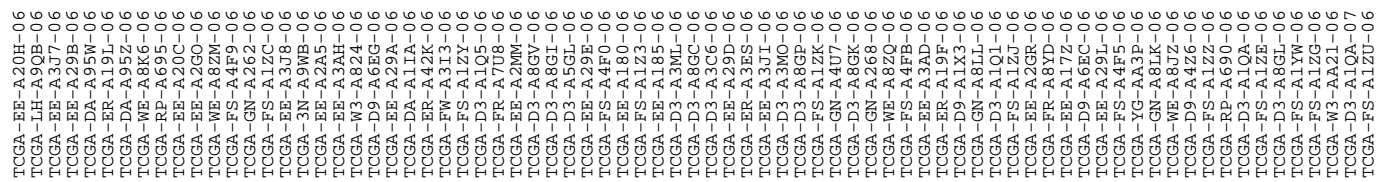

# SOX6

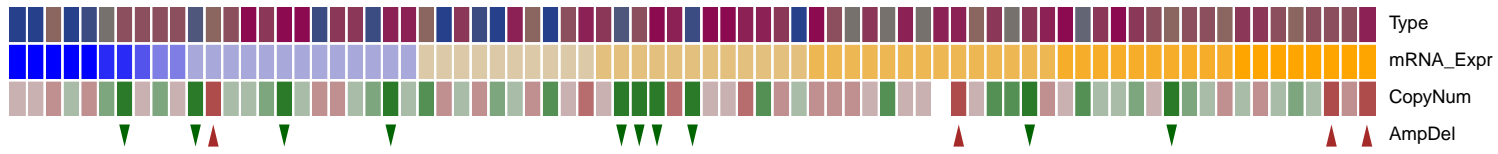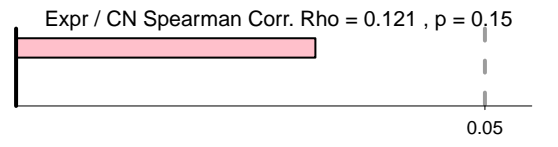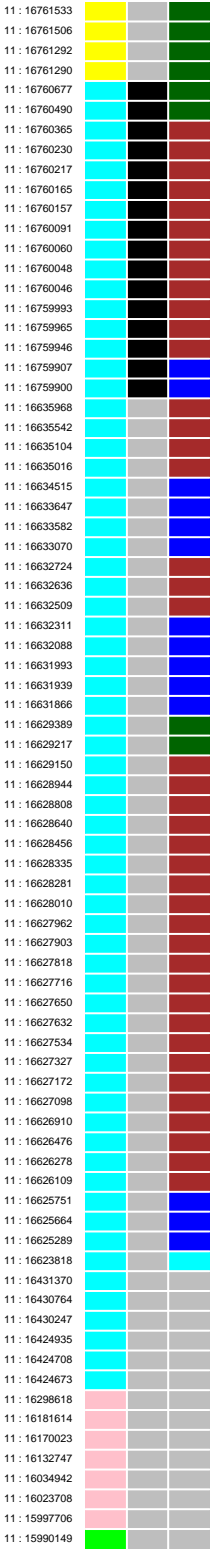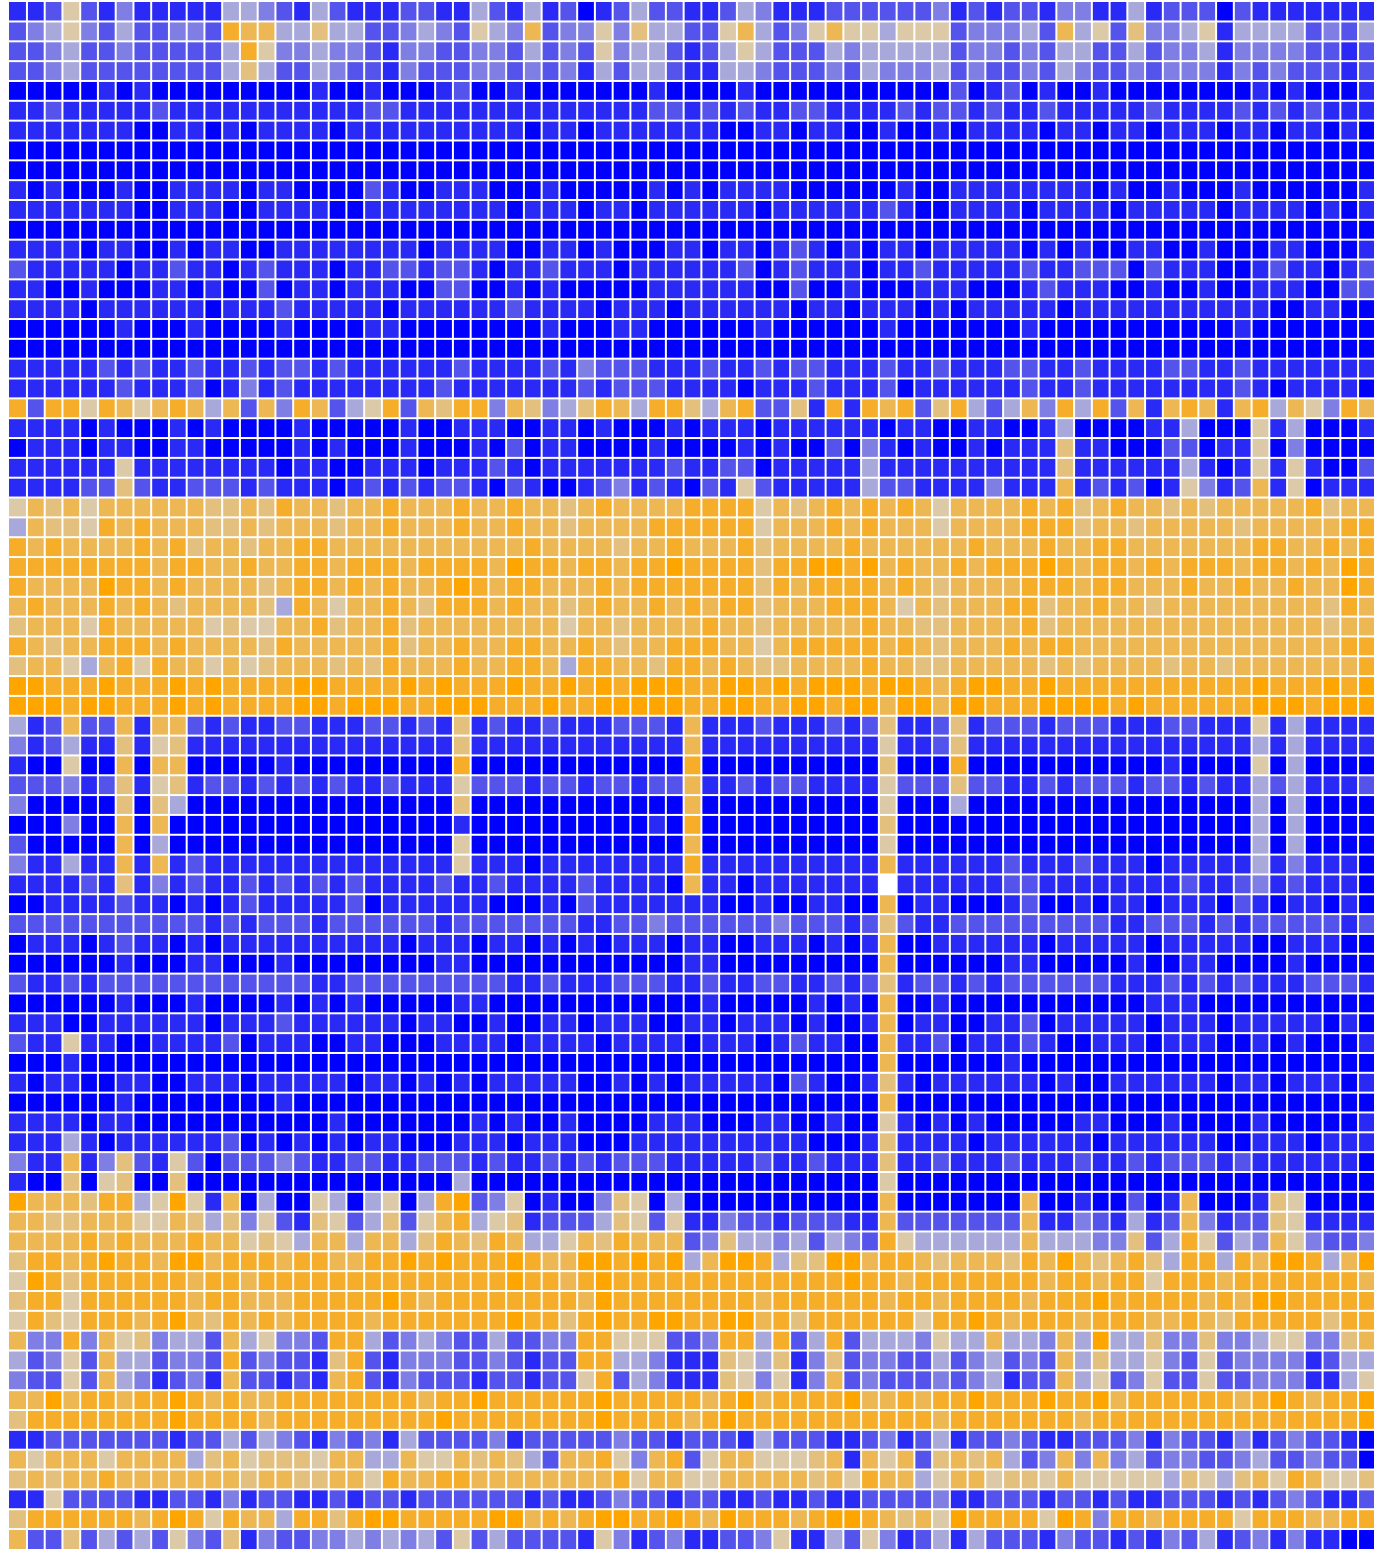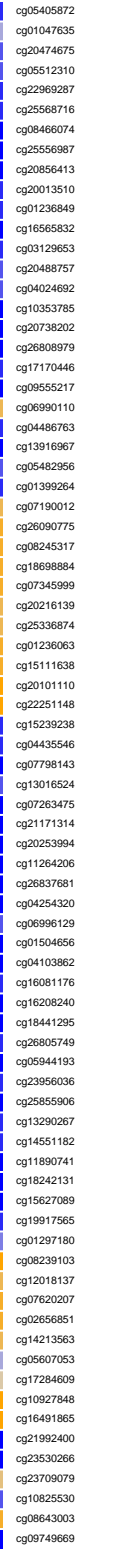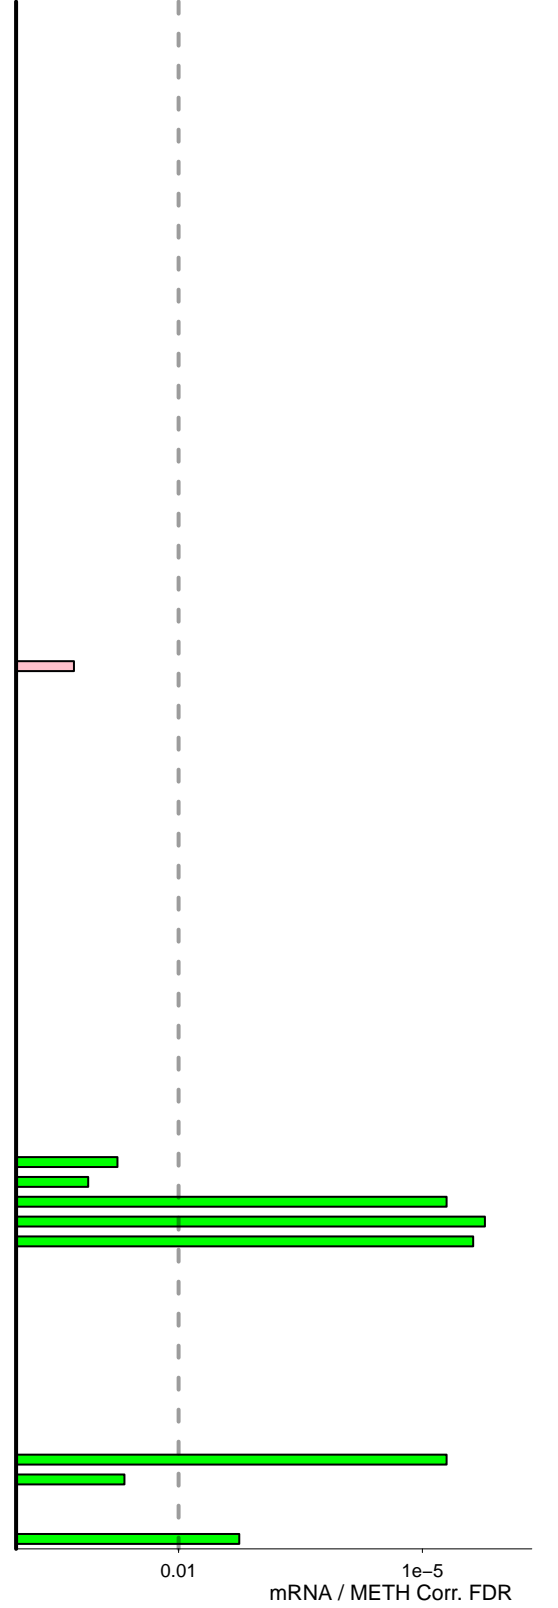

GeneLoc  
PromoterAssoc  
CpGIsland

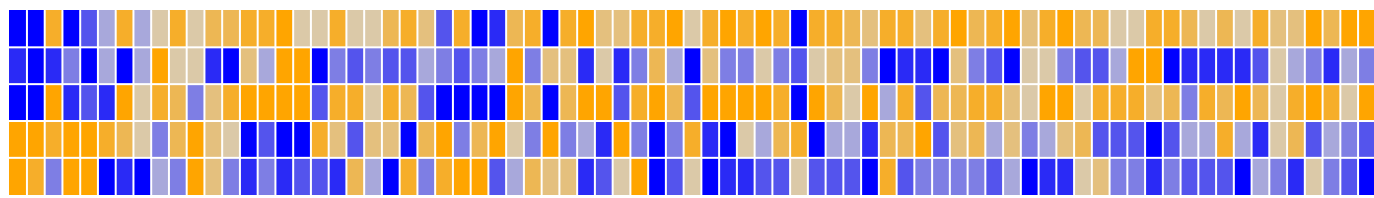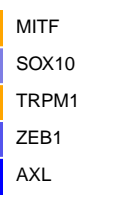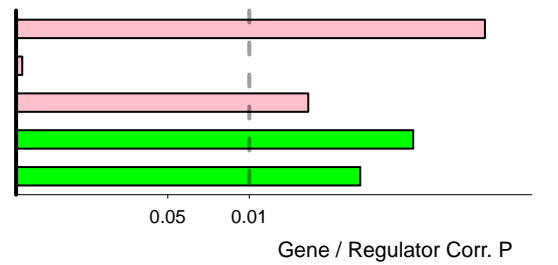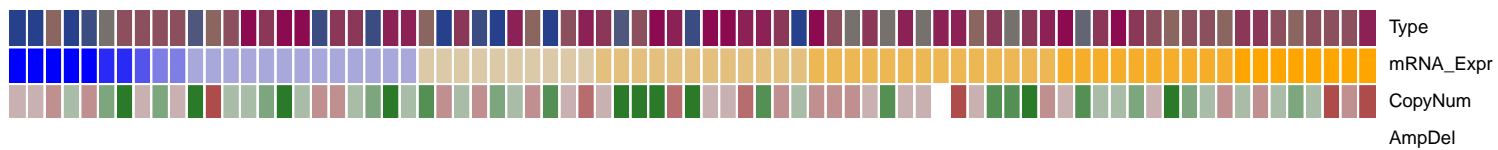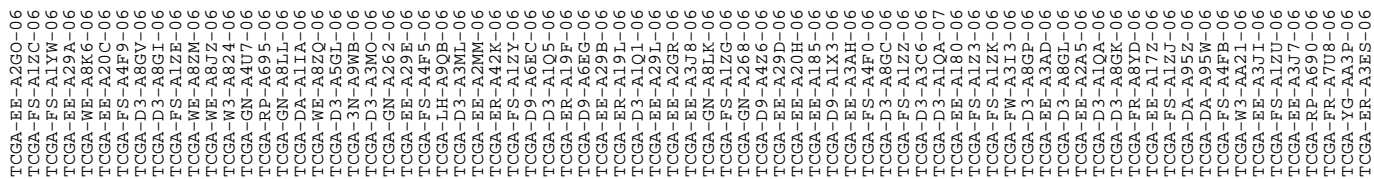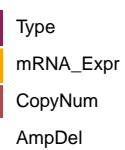

# ERBB3

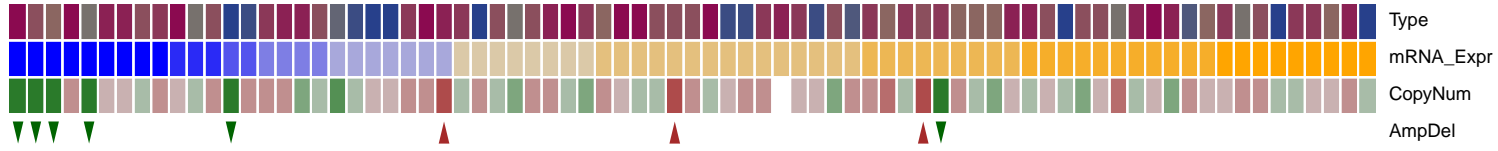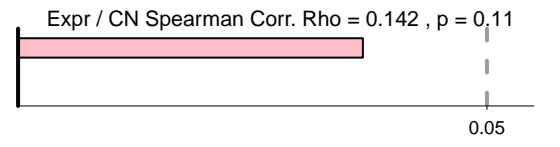

12:56472617  
12:56472805  
12:56472874  
12:56473229  
12:56473408  
12:56473559  
12:56473743  
12:56473753  
12:56473759  
12:56473973  
12:56473976  
12:56474175  
12:56474392  
12:56474569  
12:56474771  
12:56475064  
12:56479243  
12:56495114  
12:56497073

GeneLoc  
PromoterAssoc  
CpGIsland

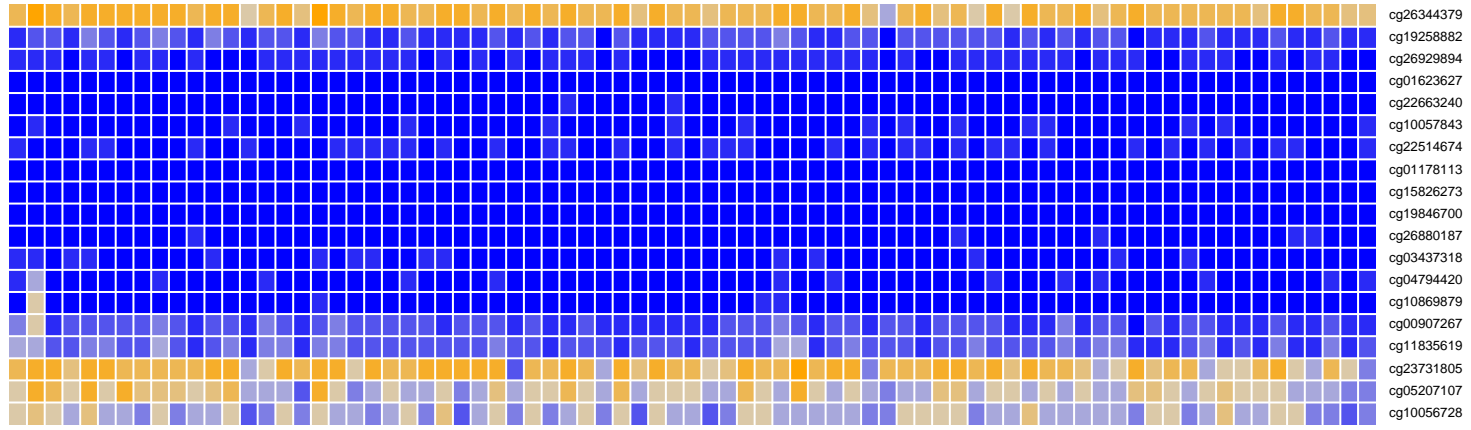

cg26344379  
cg19258882  
cg26929894  
cg01623627  
cg22663240  
cg10057843  
cg22514674  
cg01178113  
cg15826273  
cg19846700  
cg26880187  
cg03437318  
cg04794420  
cg10869879  
cg00907267  
cg11835619  
cg23731805  
cg05207107  
cg10056728

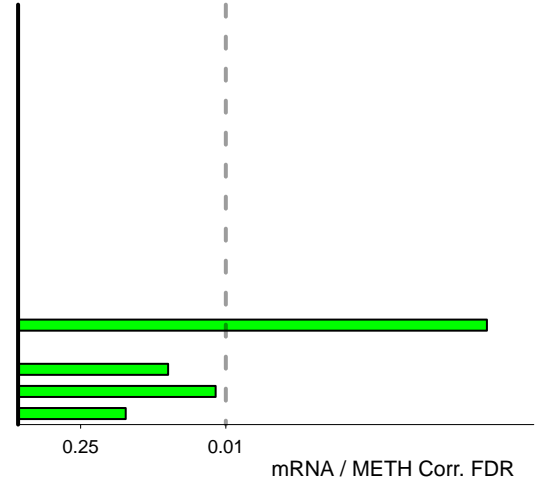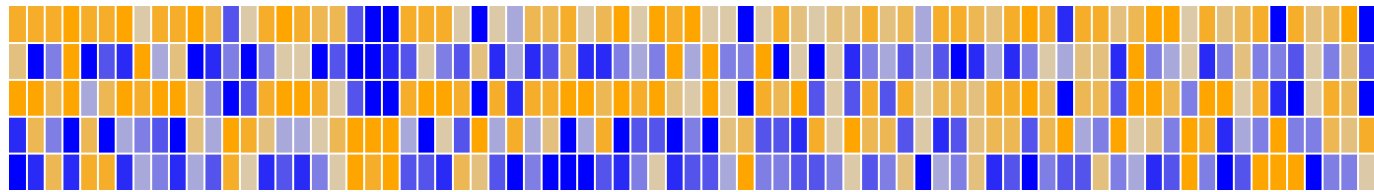

MITF  
SOX10  
TRPM1  
ZEB1  
AXL

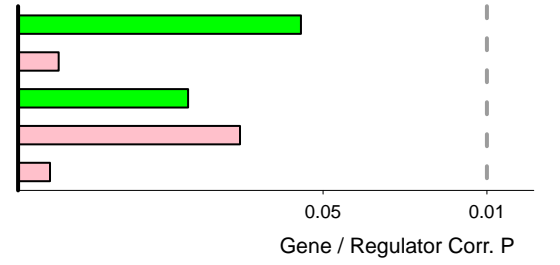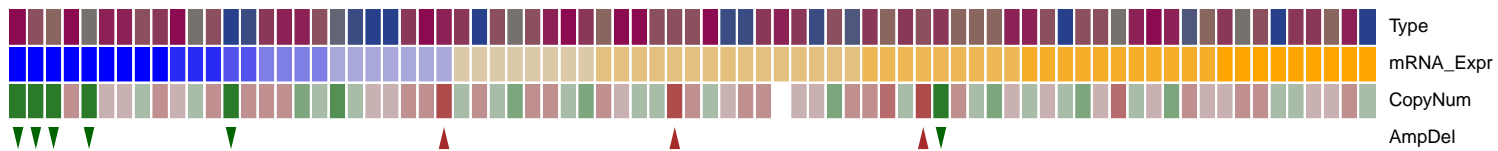

TCGA-GN-A8LK-06  
TCGA-FS-A4F9-06  
TCGA-D9-A6EC-06  
TCGA-GN-A8LL-06  
TCGA-D3-A8GC-06  
TCGA-EE-A29E-06  
TCGA-D9-A6EG-06  
TCGA-D3-A8GI-06  
TCGA-RP-A695-06  
TCGA-GN-A4U7-06  
TCGA-FW-A3I3-06  
TCGA-DA-A95Z-06  
TCGA-LH-A9OB-06  
TCGA-EE-A3J8-06  
TCGA-D3-A5GI-06  
TCGA-D9-A4Z6-06  
TCGA-EE-A3A0-06  
TCGA-EE-A2A5-06  
TCGA-EE-A2A5-06  
TCGA-WE-A8K6-06  
TCGA-FS-A1ZC-06  
TCGA-EE-A2GO-06  
TCGA-FS-A1ZK-06  
TCGA-EE-A185-06  
TCGA-GN-A268-06  
TCGA-ZN-A9WB-06  
TCGA-D3-A1Q5-06  
TCGA-DA-A95W-06  
TCGA-EE-A20C-06  
TCGA-FR-A7U8-06  
TCGA-GN-A262-06  
TCGA-EE-A29L-06  
TCGA-W3-AA21-06  
TCGA-FS-A4FB-06  
TCGA-FS-A1ZG-06  
TCGA-D3-A8GK-06  
TCGA-RP-A690-06  
TCGA-EE-A17Z-06  
TCGA-YG-AA3F-06  
TCGA-DA-A1IA-06  
TCGA-D3-A3MO-06  
TCGA-EE-A2MM-06  
TCGA-FR-A8YD-06  
TCGA-D3-A1QA-07  
TCGA-EE-A29B-06  
TCGA-WE-A8ZO-06  
TCGA-FS-A1ZU-06  
TCGA-EE-A19I-06  
TCGA-EE-A29D-06  
TCGA-EE-A4FB-06  
TCGA-D3-A1QA-06  
TCGA-D3-A8GV-06  
TCGA-FS-A1ZU-06  
TCGA-WE-A8JZ-06  
TCGA-EE-A3J7-06  
TCGA-FS-A1ZZ-06  
TCGA-ER-A3ES-06  
TCGA-FS-A1ZE-06  
TCGA-ER-A42K-06  
TCGA-D9-A1X3-06  
TCGA-ER-A19F-06  
TCGA-D3-A3C6-06  
TCGA-FS-A1ZY-06  
TCGA-EE-A2GR-06  
TCGA-WE-A8ZN-06  
TCGA-FS-A1YW-06  
TCGA-EE-A3AH-06  
TCGA-EE-A3AH-06  
TCGA-D3-A1Q1-06  
TCGA-EE-A29A-06  
TCGA-D3-A3ML-06  
TCGA-D3-A8GF-06  
TCGA-FS-A1Z3-06  
TCGA-EE-A180-06  
TCGA-EE-A20H-06

# PIR

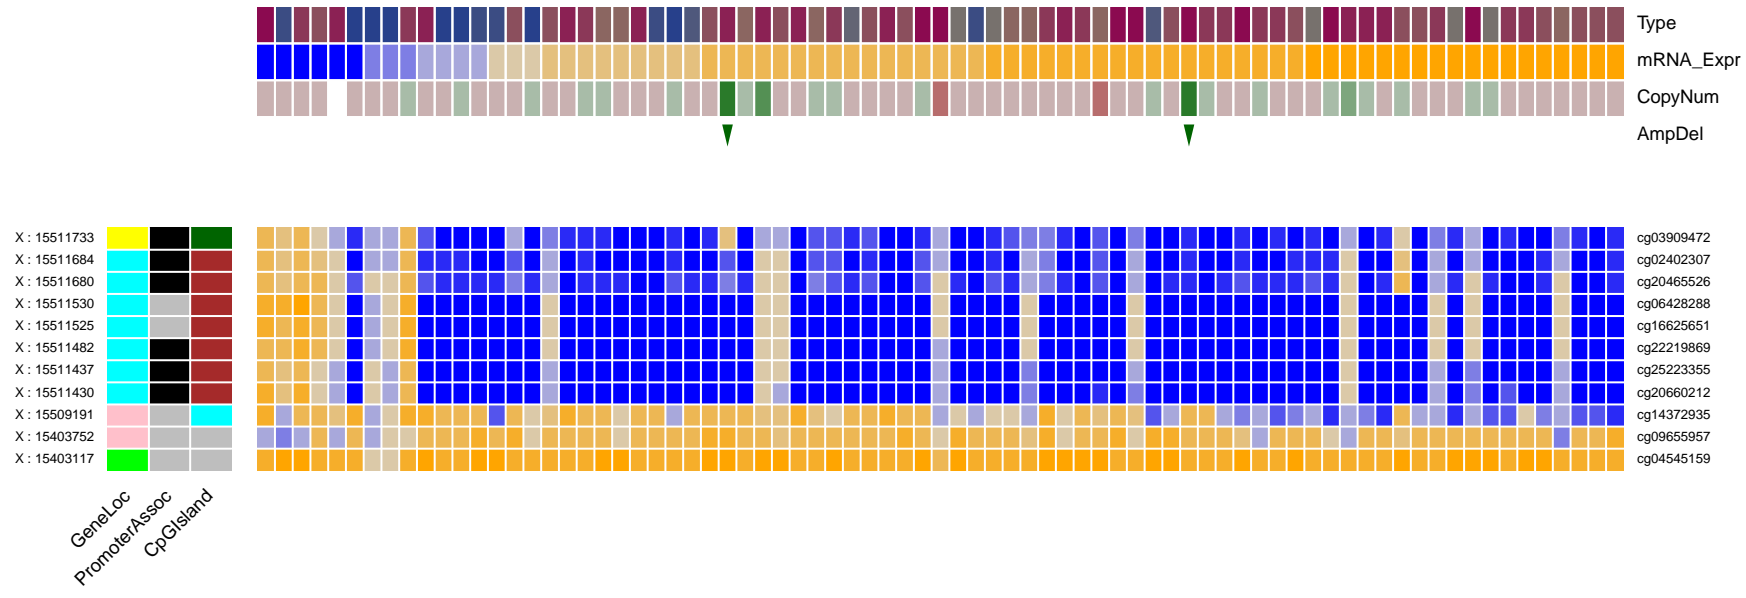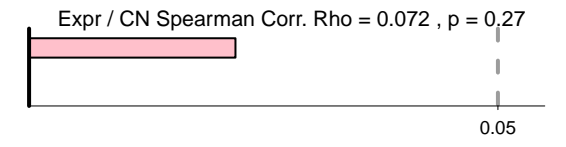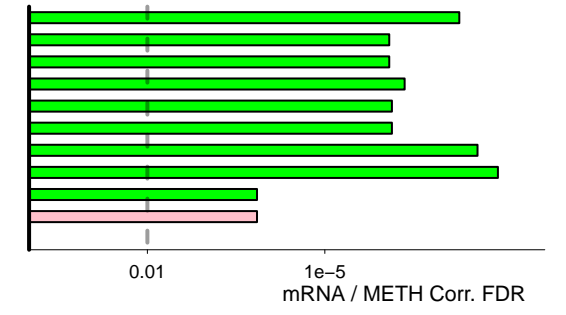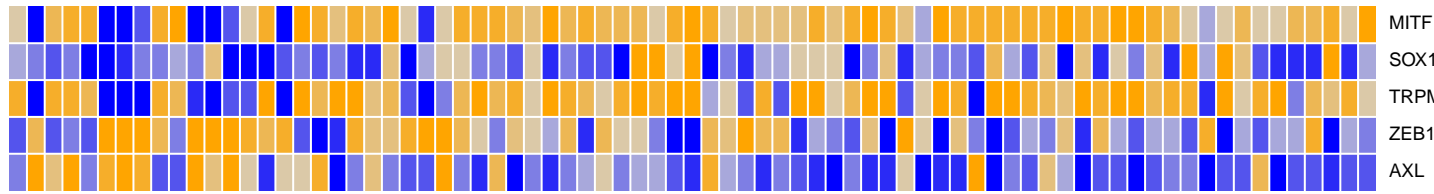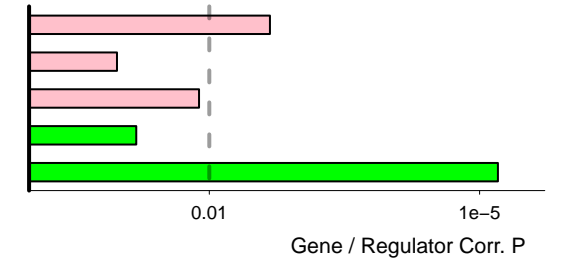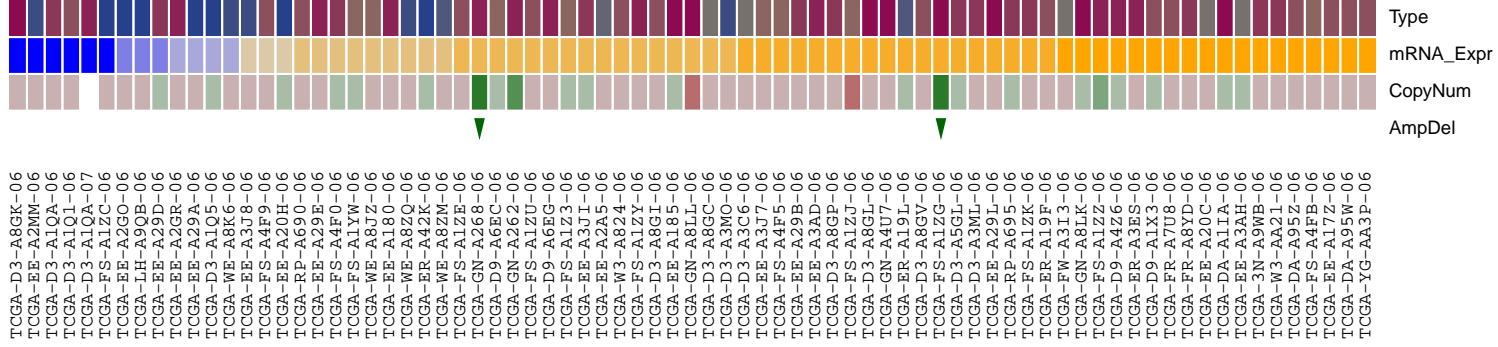

# STK32A

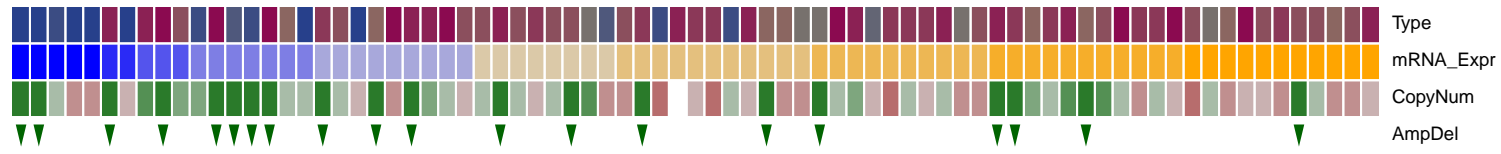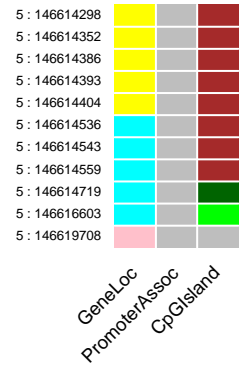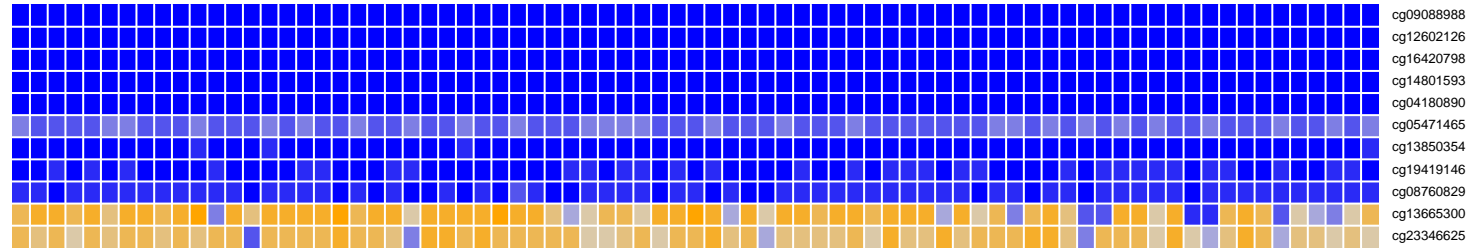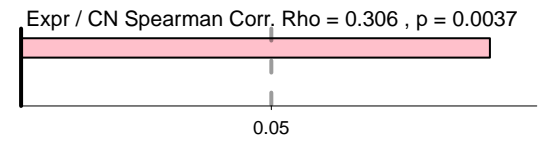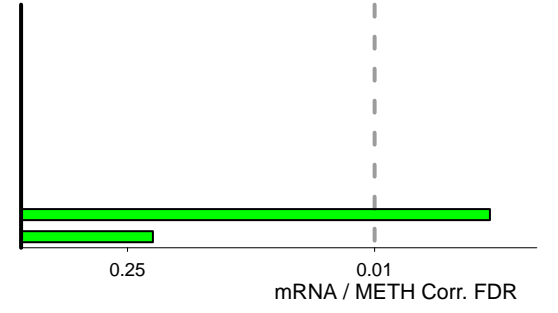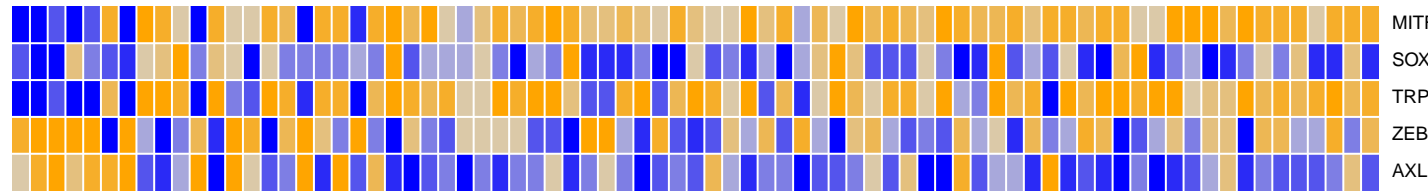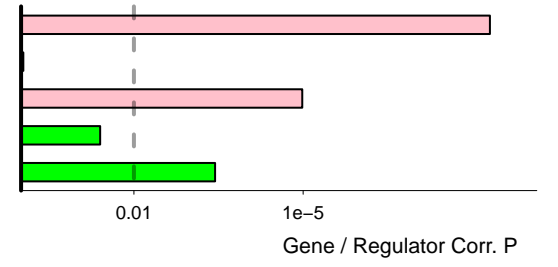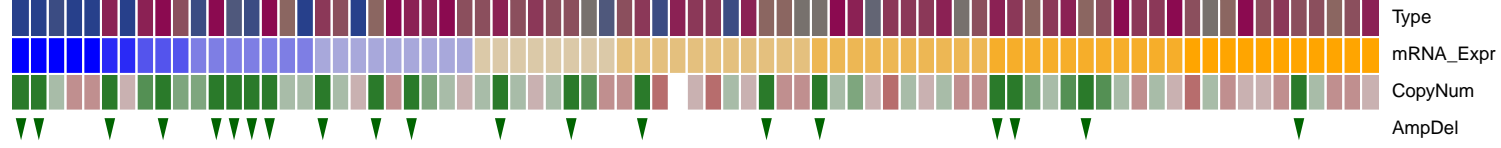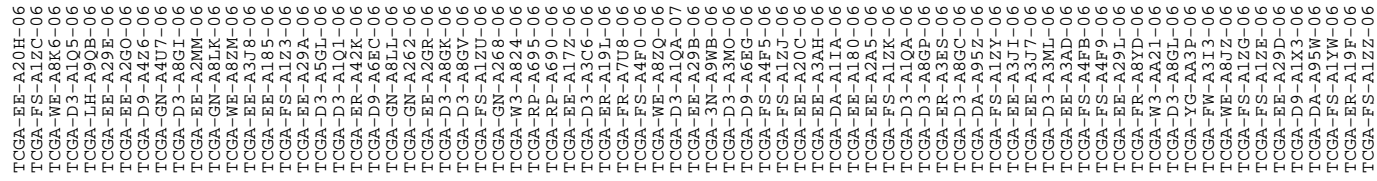

# SCARB1

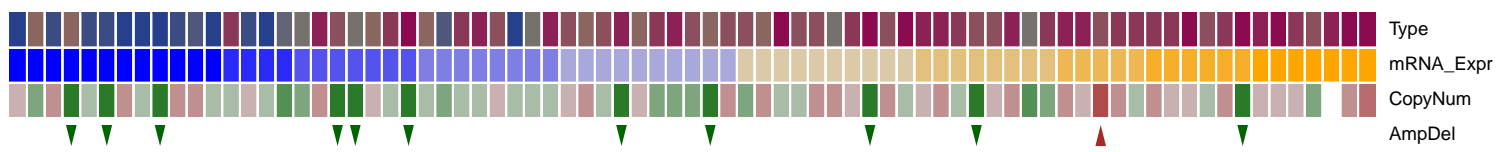

Expr / CN Spearman Corr. Rho = 0.284 , p = 0.0067

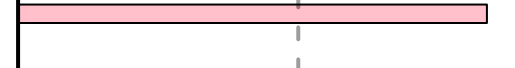

0.05

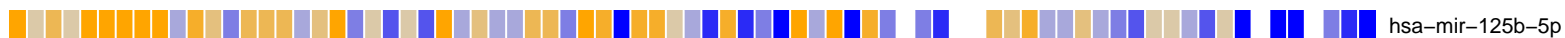

mRNA / miR Corr. FDR

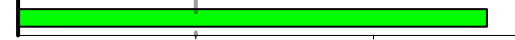

0.1

0.01

12 : 125359749  
12 : 125349072  
12 : 125348871  
12 : 125348591  
12 : 125348579  
12 : 125348448  
12 : 125348358  
12 : 125348168  
12 : 125347797  
12 : 125346253  
12 : 125339904  
12 : 125333358  
12 : 125333322  
12 : 125333267  
12 : 125332183  
12 : 125325097  
12 : 125320887  
12 : 125302275  
12 : 125302246  
12 : 125302114  
12 : 125299800  
12 : 125299686  
12 : 125299563  
12 : 125297360  
12 : 125292513  
12 : 125287476  
12 : 125282342  
12 : 125271306  
12 : 125262045

GeneLoc  
PromoterAssoc  
CpGIsland

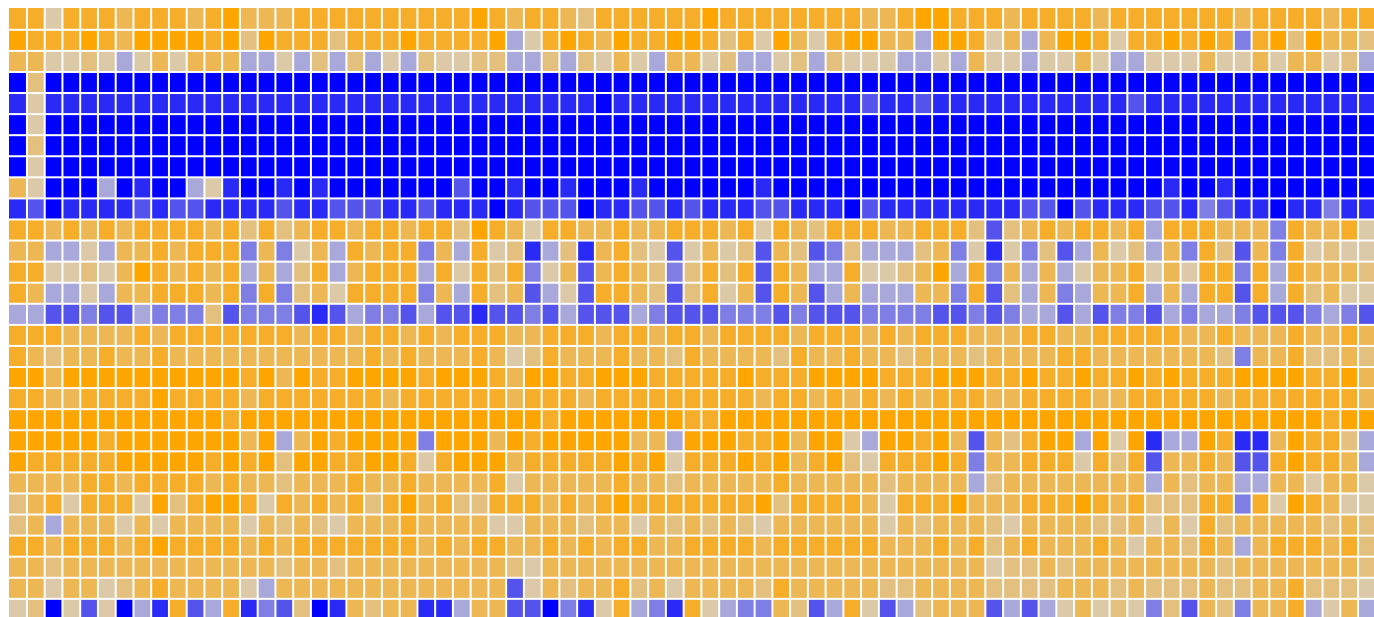

cg16604391  
cg17678881  
cg27180443  
cg15283062  
cg00894440  
cg10462093  
cg00531400  
cg02250992  
cg06719671  
cg15282973  
cg09882144  
cg23460943  
cg14846380  
cg13075279  
cg22775642  
cg05620762  
cg05302218  
cg24769501  
cg15933484  
cg17514098  
cg21558509  
cg01663970  
cg19950933  
cg25043237  
cg21442040  
cg11198639  
cg12053291  
cg10911287  
cg09789874

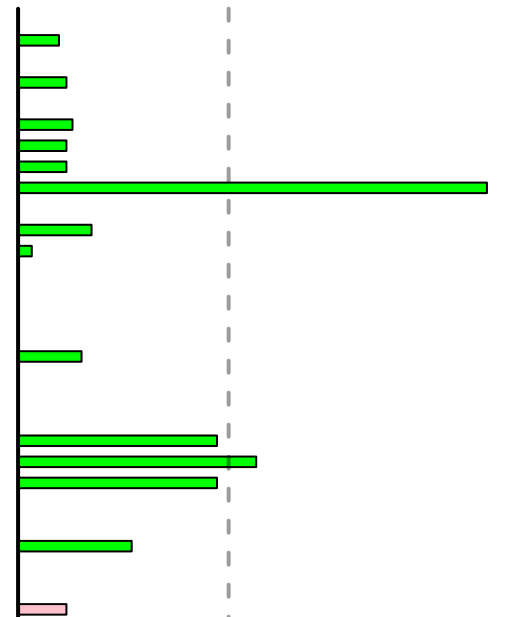

0.25 0.01 mRNA / METH Corr. FDR

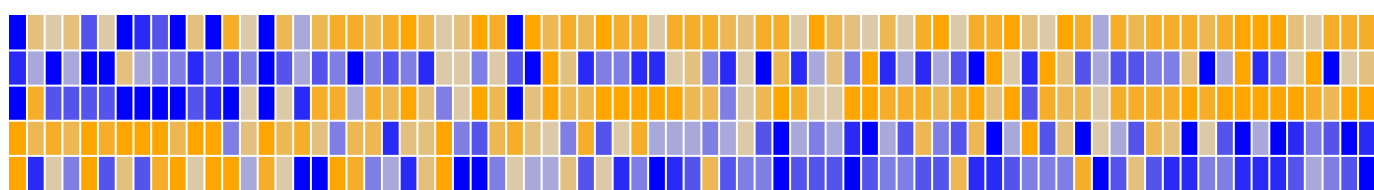

MITF  
SOX10  
TRPM1  
ZEB1  
AXL

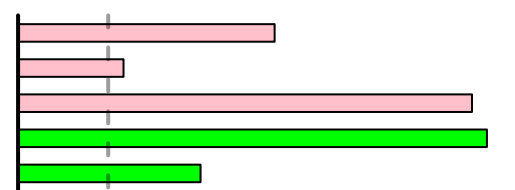

0.01 1e-5 1e-10 Gene / Regulator Corr. P

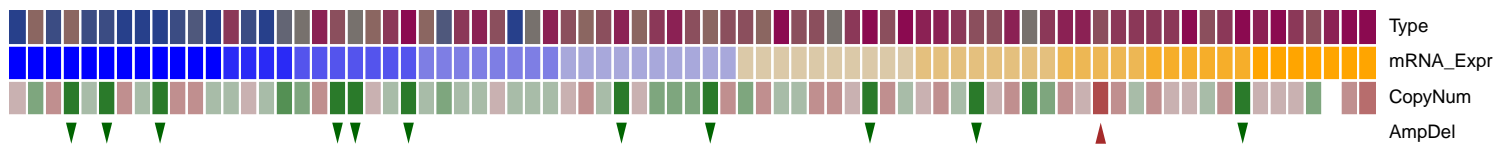

TCGA-EE-A2G0-06  
TCGA-EE-A3J7-06  
TCGA-EE-A3J8-06  
TCGA-FS-A4F5-06  
TCGA-WE-A8K6-06  
TCGA-WE-A8ZQ-06  
TCGA-D3-A1O5-06  
TCGA-ER-A42K-06  
TCGA-LH-A9OB-06  
TCGA-EE-A2NM-06  
TCGA-ER-A19L-06  
TCGA-EE-A29A-06  
TCGA-D3-A3ML-06  
TCGA-D3-A3MO-06  
TCGA-FS-A1ZC-06  
TCGA-EE-A2J5-06  
TCGA-EE-A2JC-06  
TCGA-GN-A2G2-06  
TCGA-D3-A1Q1-06  
TCGA-D3-A8GC-06  
TCGA-FS-A1Z3-06  
TCGA-EE-A3J1-06  
TCGA-D3-A8GL-06  
TCGA-WE-A8JZ-06  
TCGA-EE-A8ZM-06  
TCGA-D3-A8GP-06  
TCGA-ER-A3ES-06  
TCGA-FS-A1ZE-06  
TCGA-EE-A20H-06  
TCGA-FW-A3I3-06  
TCGA-FS-A1ZY-06  
TCGA-ER-A19F-06  
TCGA-FS-A4FB-06  
TCGA-RP-A690-06  
TCGA-GN-A268-06  
TCGA-FS-A1YW-06  
TCGA-W3-AA21-06  
TCGA-EE-A3AD-06  
TCGA-D9-A1X3-06  
TCGA-D9-A6FC-06  
TCGA-DA-A95Z-06  
TCGA-FS-A1ZU-06  
TCGA-EE-A29L-06  
TCGA-DA-A95W-06  
TCGA-YG-AA3P-06  
TCGA-EE-A32H-06  
TCGA-FS-A4F0-06  
TCGA-DA-A1IA-06  
TCGA-FR-A7U8-06  
TCGA-D3-A89K-06  
TCGA-FS-A1ZZ-06  
TCGA-EE-A2GR-06  
TCGA-3N-A9WB-06  
TCGA-FS-A4F9-06  
TCGA-EE-A17Z-06  
TCGA-D9-A4Z6-06  
TCGA-D3-A3C6-06  
TCGA-FR-A8YD-06  
TCGA-EE-A180-06  
TCGA-EE-A29E-06  
TCGA-D3-A8GV-06  
TCGA-FS-A1ZK-06  
TCGA-EE-A29D-06  
TCGA-D3-A5GL-06  
TCGA-GN-A4U7-06  
TCGA-W3-A824-06  
TCGA-RP-A695-06  
TCGA-GN-A8LL-06  
TCGA-D9-A6EG-06  
TCGA-FS-A1ZG-06  
TCGA-EE-A29B-06  
TCGA-D3-A8G1-06  
TCGA-D3-A1QA-07  
TCGA-EE-A185-06  
TCGA-GN-A8LK-06

# OVOS2

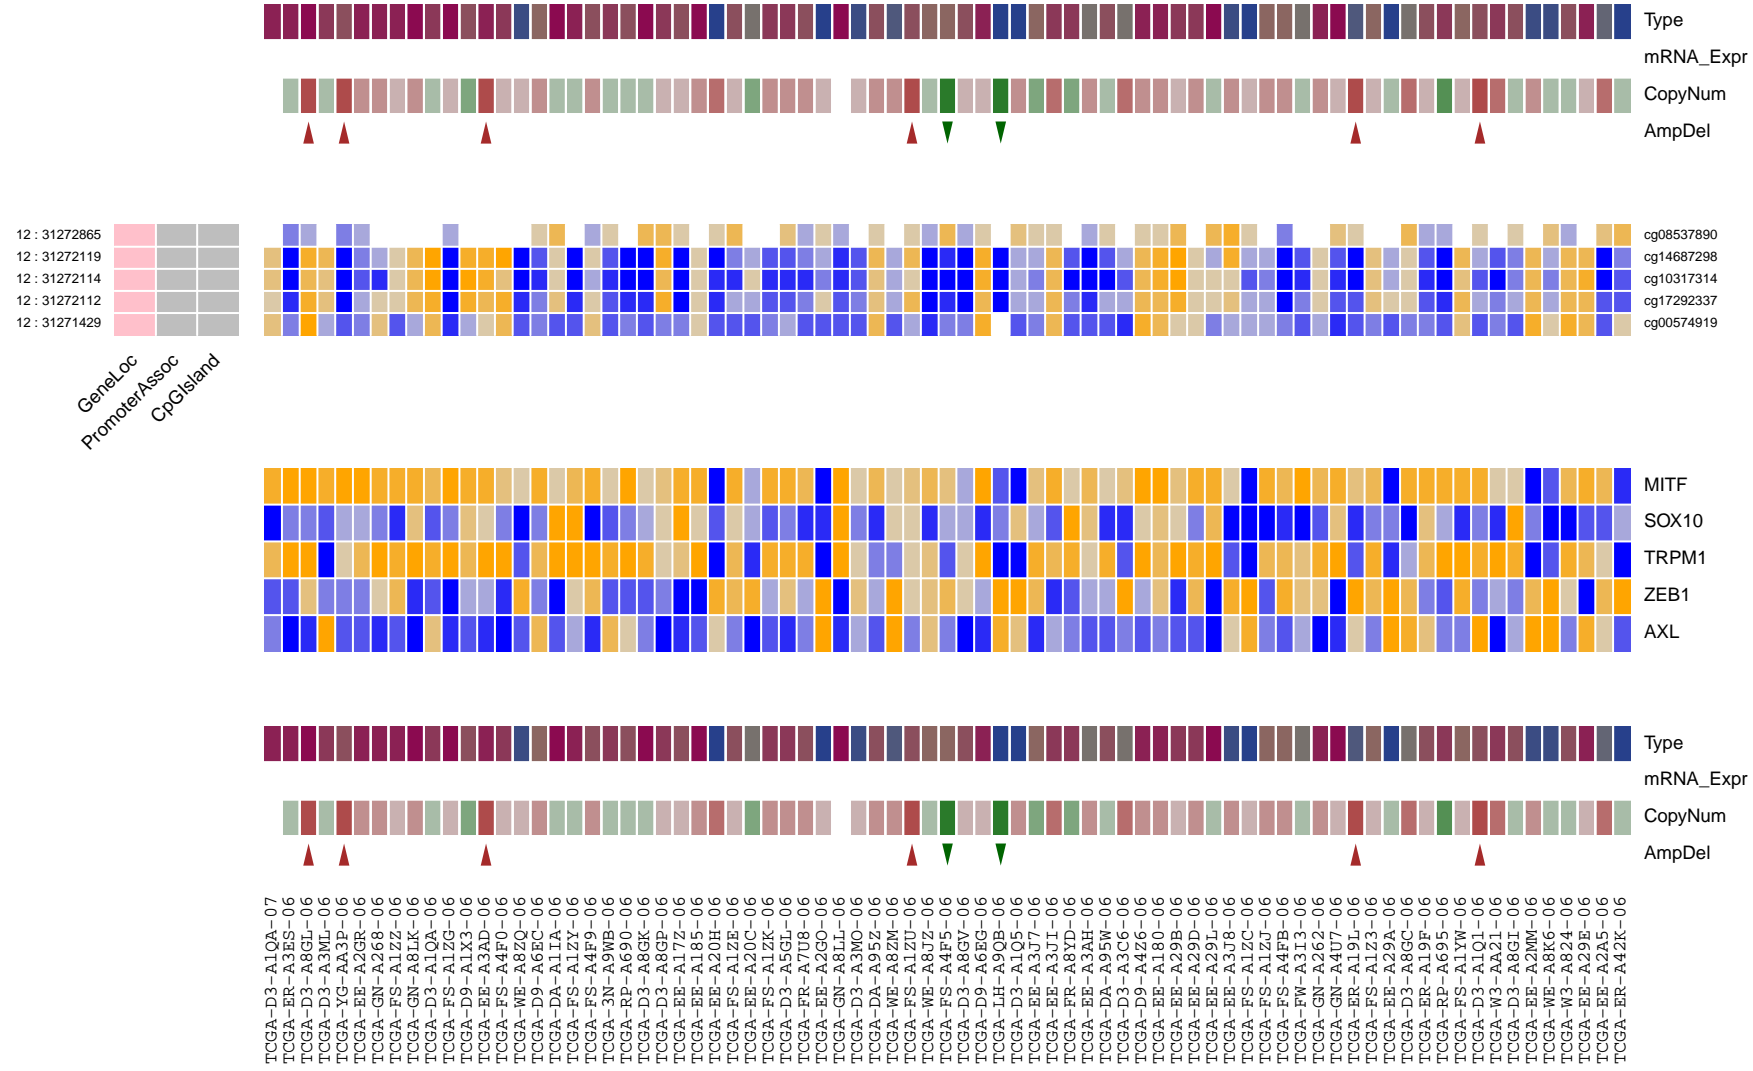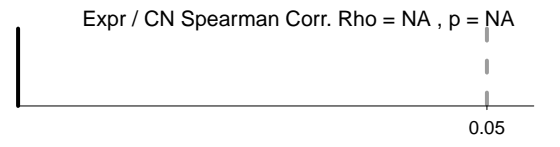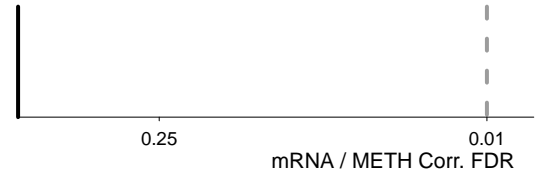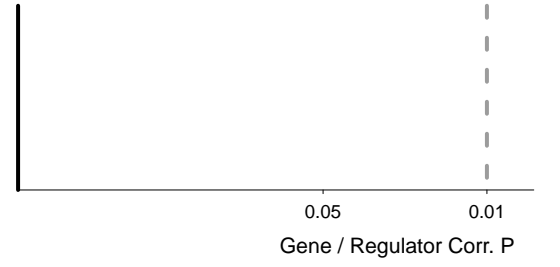



# CHCHD6

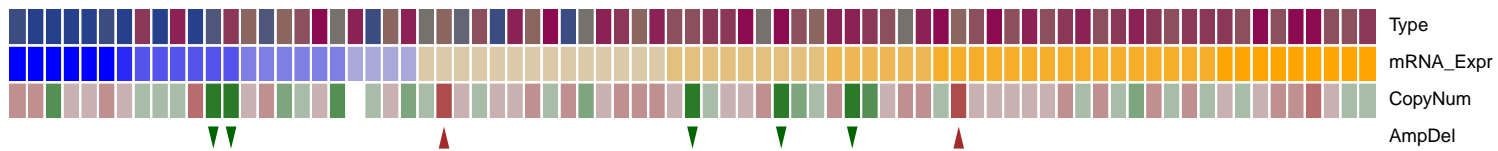

3 : 126422892  
 3 : 126422945  
 3 : 126423056  
 3 : 126423063  
 3 : 126423065  
 3 : 126423069  
 3 : 126423087  
 3 : 126423553  
 3 : 126423799  
 3 : 126426394  
 3 : 126440043  
 3 : 126452023  
 3 : 126465994  
 3 : 126471560  
 3 : 126537252  
 3 : 126554736  
 3 : 126569599  
 3 : 126603491  
 3 : 126613533  
 3 : 126630478  
 3 : 126651695  
 3 : 126665084  
 3 : 126668133  
 3 : 126668519  
 3 : 126670429  
 3 : 126671985  
 3 : 126679199

GeneLoc  
 PromoterAssoc  
 CpIsland

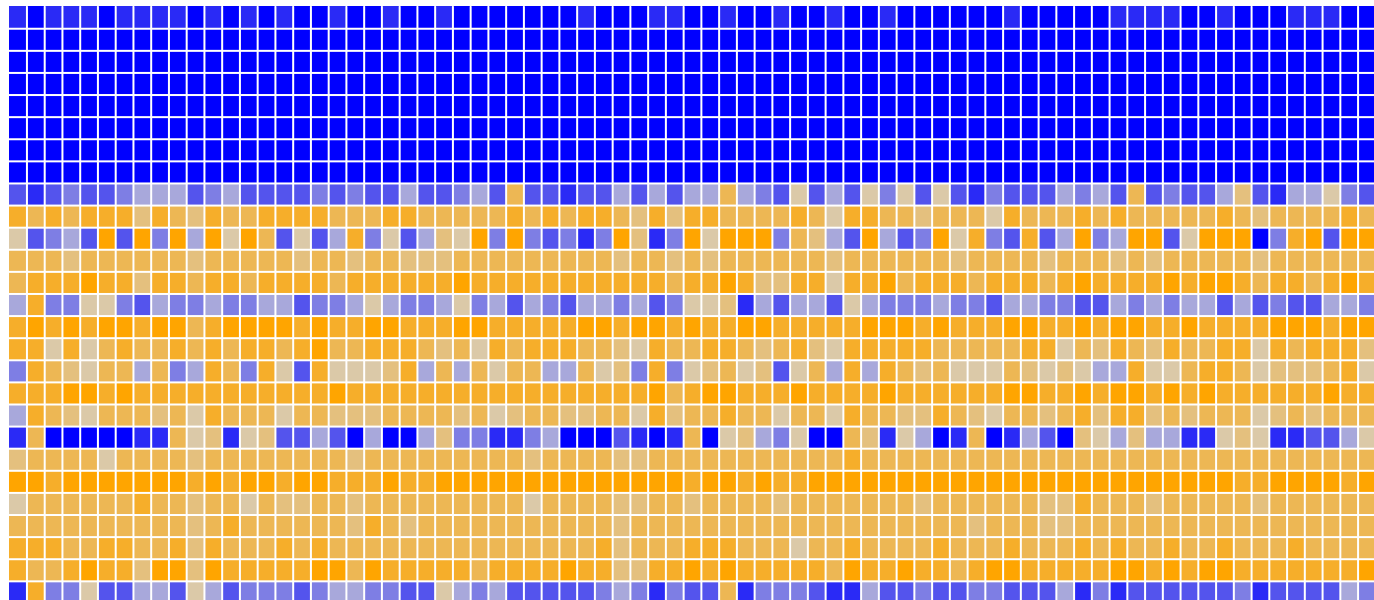

Type  
 mRNA\_Expr  
 CopyNum  
 AmpDel

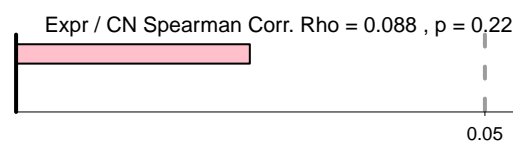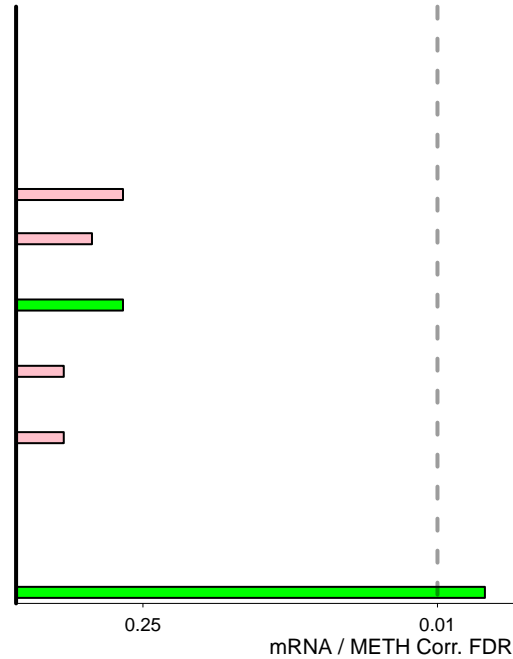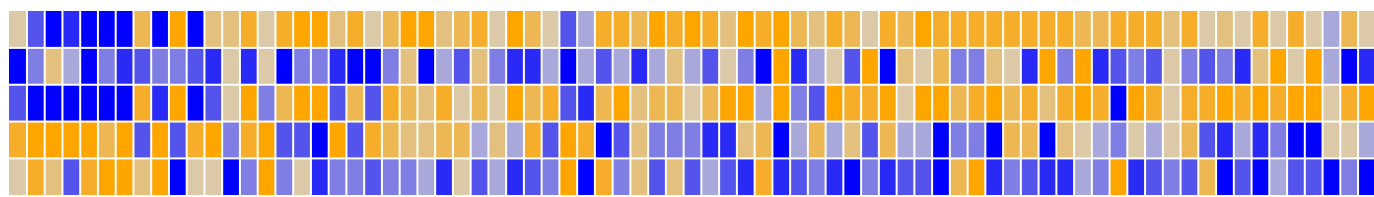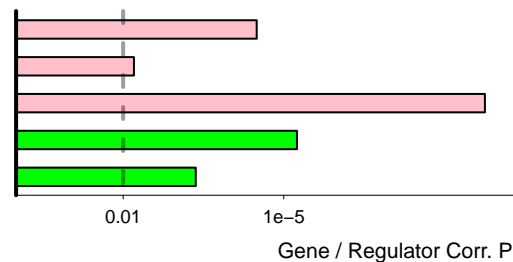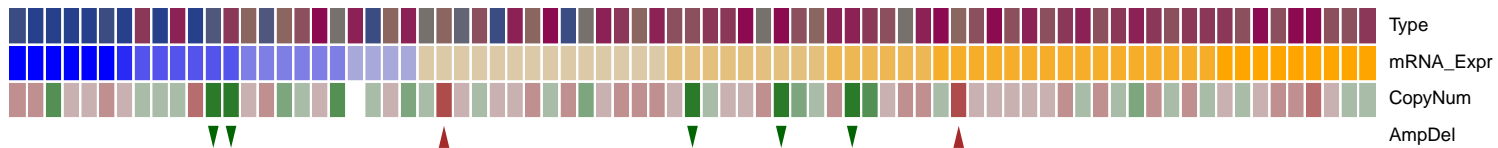

TCGA-EE-A3J8-06  
 TCGA-LH-A9OB-06  
 TCGA-D3-A1Q5-06  
 TCGA-ER-A42K-06  
 TCGA-FS-A1ZC-06  
 TCGA-EE-A2MM-06  
 TCGA-EE-A2GO-06  
 TCGA-D3-A1QA-06  
 TCGA-ER-A29A-06  
 TCGA-ER-A3FS-06  
 TCGA-EE-A20H-06  
 TCGA-ER-A19L-06  
 TCGA-D3-A8GP-06  
 TCGA-FS-A1YW-06  
 TCGA-WE-A8ZM-06  
 TCGA-FS-A1ZT-06  
 TCGA-EP-A690-06  
 TCGA-FS-A1ZC-06  
 TCGA-D3-A3C6-06  
 TCGA-D3-A1QA-07  
 TCGA-WE-A8ZQ-06  
 TCGA-FS-A1Z3-06  
 TCGA-EE-A180-06  
 TCGA-FW-A3J7-06  
 TCGA-EE-A2A5-06  
 TCGA-D9-A1X3-06  
 TCGA-D3-A3NO-06  
 TCGA-D9-A6EG-06  
 TCGA-FS-A4FB-06  
 TCGA-D3-A8GK-06  
 TCGA-WE-A8K6-06  
 TCGA-EE-A20C-06  
 TCGA-EP-A29E-06  
 TCGA-EP-A695-06  
 TCGA-WE-A8JZ-06  
 TCGA-EE-A2GR-06  
 TCGA-ER-A19F-06  
 TCGA-YG-AA3P-06  
 TCGA-EE-A3JI-06  
 TCGA-EE-A29B-06  
 TCGA-D3-A8GL-06  
 TCGA-D3-A8GC-06  
 TCGA-GN-A8LL-06  
 TCGA-DA-A95Z-06  
 TCGA-FS-A4F5-06  
 TCGA-EE-A3AD-06  
 TCGA-GN-A26Z-06  
 TCGA-FR-A8YD-06  
 TCGA-FS-A4F9-06  
 TCGA-EE-A3AH-06  
 TCGA-EB-A34H-06  
 TCGA-D9-A4Z6-06  
 TCGA-EE-A25L-06  
 TCGA-D9-A6EC-06  
 TCGA-D3-A1Q1-06  
 TCGA-GN-A4U7-06  
 TCGA-FS-A1ZE-06  
 TCGA-FS-A1ZZ-06  
 TCGA-EE-A17Z-06  
 TCGA-D3-A5GL-06  
 TCGA-FS-A1ZY-06  
 TCGA-FR-A7U8-06  
 TCGA-D3-A3ML-06  
 TCGA-GN-A268-06  
 TCGA-FS-A1ZK-06  
 TCGA-EE-A29D-06  
 TCGA-3N-A9WB-06  
 TCGA-FS-A4F0-06  
 TCGA-DA-A95W-06  
 TCGA-GN-A8LK-06  
 TCGA-D3-A8GI-06  
 TCGA-EE-A185-06  
 TCGA-DA-A1IA-06  
 TCGA-D3-A8GV-06  
 TCGA-W3-A824-06  
 TCGA-W3-AA21-06

Type  
 mRNA\_Expr  
 CopyNum  
 AmpDel

# SORT1

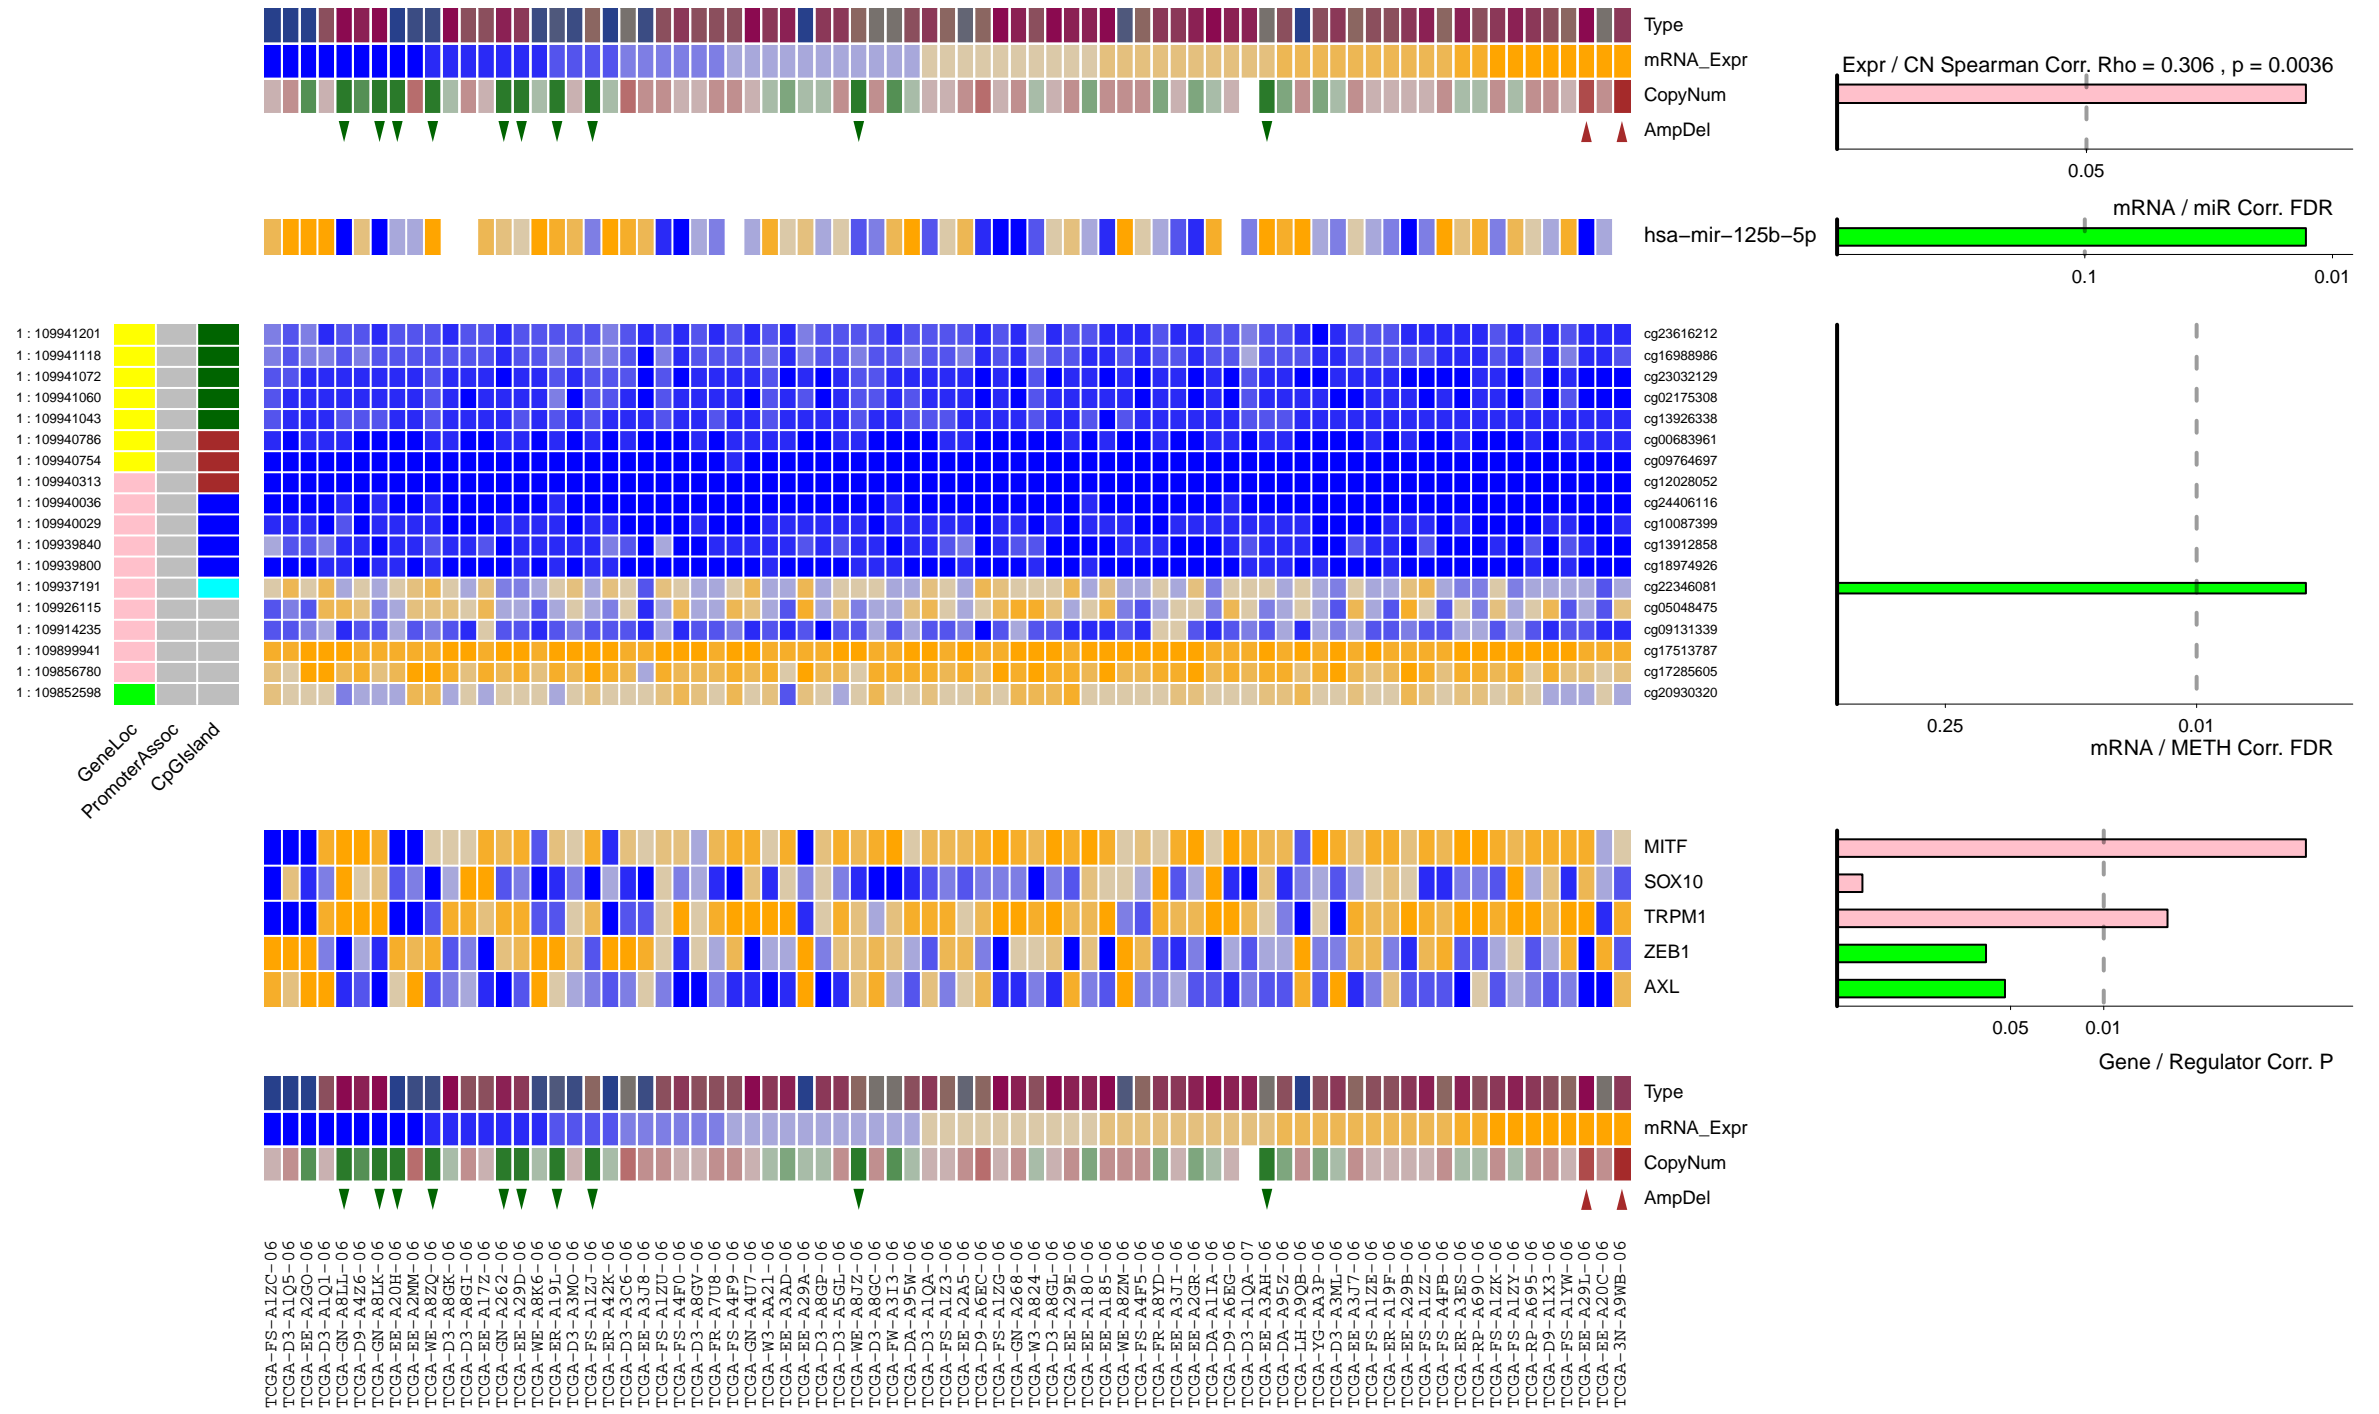

# MICAL1

6 : 109789073  
 6 : 109780058  
 6 : 109778433  
 6 : 109777642  
 6 : 109777592  
 6 : 109777324  
 6 : 109777307  
 6 : 109777295  
 6 : 109777193  
 6 : 109777049  
 6 : 109776240  
 6 : 109776195  
 6 : 109775161  
 6 : 109775014  
 6 : 109774738  
 6 : 109772729

GeneLoc  
 PromoterAssoc  
 CpGIsland

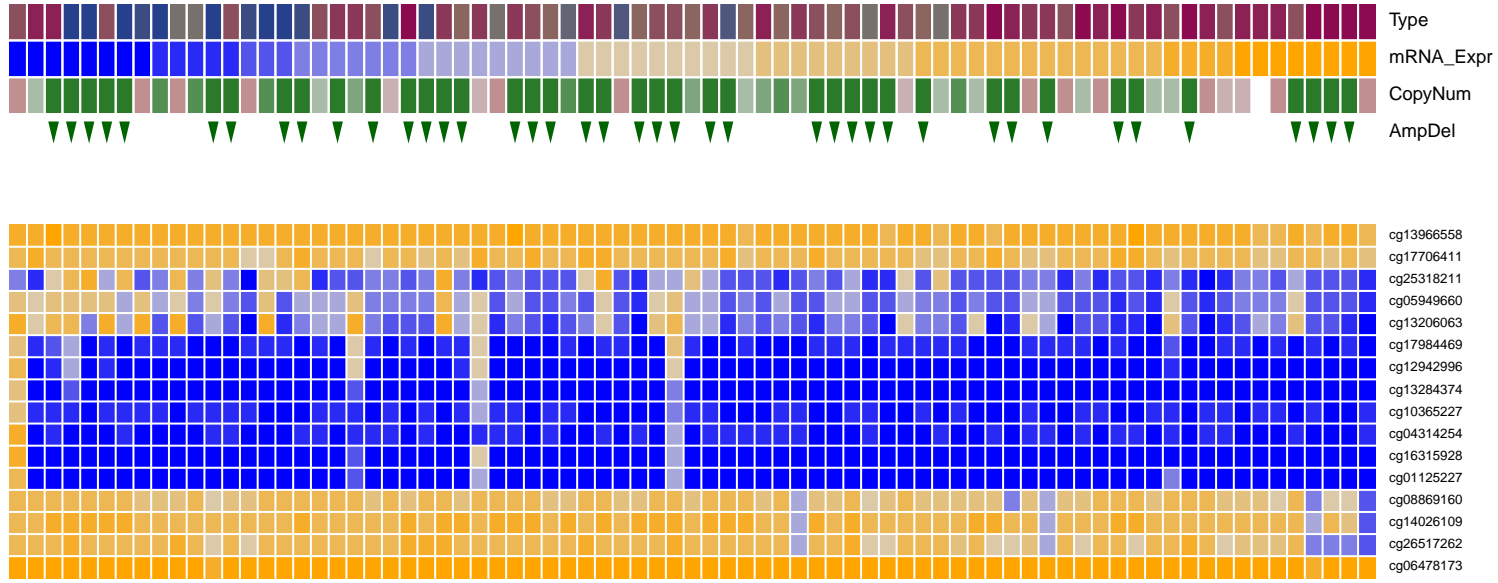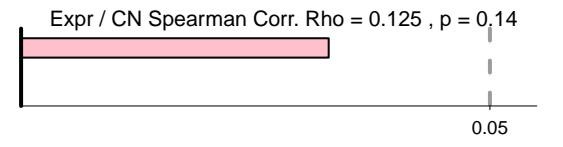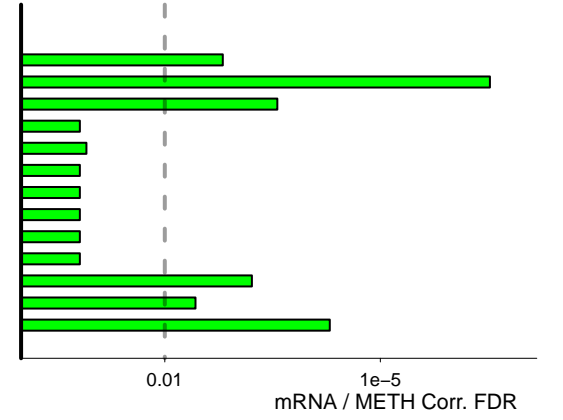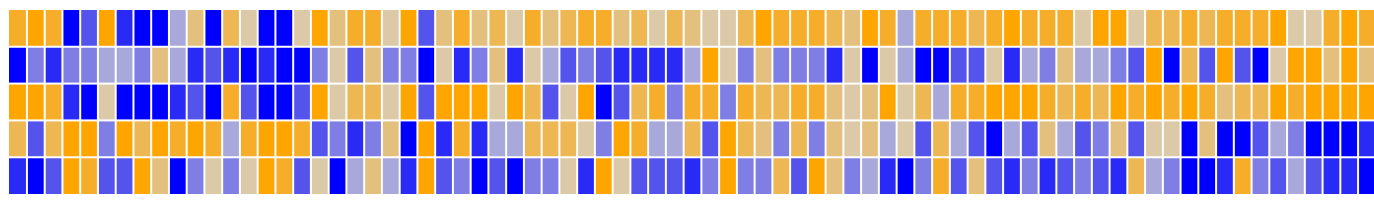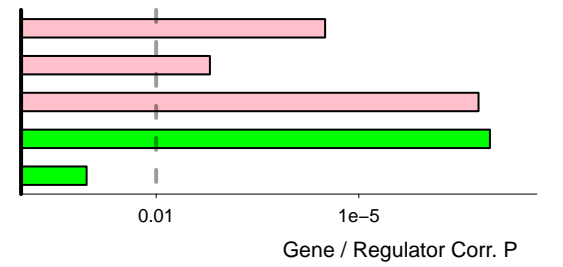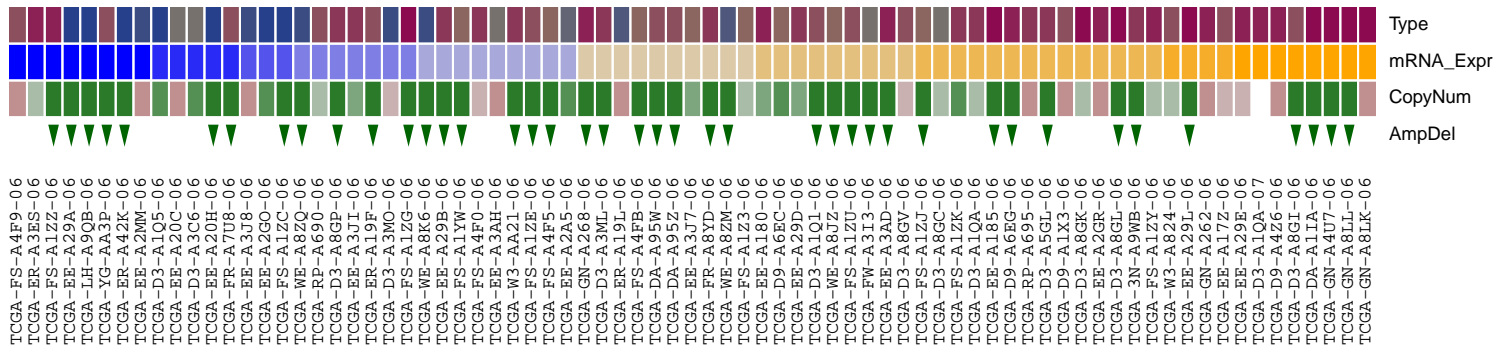

TCGA-FS-A4F9-06  
 TCGA-ER-A3ES-06  
 TCGA-FS-A1ZZ-06  
 TCGA-EE-A29A-06  
 TCGA-LH-A9QB-06  
 TCGA-YG-AA3P-06  
 TCGA-ER-A42K-06  
 TCGA-EE-A2MM-06  
 TCGA-D3-A1O5-06  
 TCGA-EE-A20C-06  
 TCGA-D3-A3C6-06  
 TCGA-EE-A20H-06  
 TCGA-ER-A7U8-06  
 TCGA-EE-A3J8-06  
 TCGA-EE-A2G0-06  
 TCGA-FS-A1ZC-06  
 TCGA-WE-A8ZC-06  
 TCGA-PE-A690-06  
 TCGA-D3-A8GF-06  
 TCGA-EE-A3J1-06  
 TCGA-ER-A19F-06  
 TCGA-D3-A3MO-06  
 TCGA-FS-A1ZG-06  
 TCGA-WE-A8K6-06  
 TCGA-EE-A29B-06  
 TCGA-FS-A1YW-06  
 TCGA-FS-A4F0-06  
 TCGA-EE-A3AH-06  
 TCGA-W3-AA21-06  
 TCGA-FS-A1ZE-06  
 TCGA-FS-A4F5-06  
 TCGA-EE-A2A5-06  
 TCGA-GN-A268-06  
 TCGA-D3-A3ML-06  
 TCGA-ER-A19L-06  
 TCGA-FS-A4FB-06  
 TCGA-DA-A95W-06  
 TCGA-DA-A95Z-06  
 TCGA-EE-A3J7-06  
 TCGA-ER-A8YD-06  
 TCGA-WE-A8ZM-06  
 TCGA-EE-A123-06  
 TCGA-EE-A180-06  
 TCGA-D9-A6EC-06  
 TCGA-EE-A29D-06  
 TCGA-D3-A1O1-06  
 TCGA-WE-A8JZ-06  
 TCGA-FS-A1ZU-06  
 TCGA-FW-A313-06  
 TCGA-EE-A3AD-06  
 TCGA-D3-A8CV-06  
 TCGA-FS-A1ZJ-06  
 TCGA-D3-A8GC-06  
 TCGA-FS-A1ZK-06  
 TCGA-D3-A1QA-06  
 TCGA-EE-A185-06  
 TCGA-D9-A6EG-06  
 TCGA-RP-A695-06  
 TCGA-D3-A5GL-06  
 TCGA-D9-A1X3-06  
 TCGA-D3-A8GK-06  
 TCGA-EE-A2GR-06  
 TCGA-D3-A8GL-06  
 TCGA-3N-A9WE-06  
 TCGA-FS-A1ZY-06  
 TCGA-W3-A824-06  
 TCGA-EE-A29L-06  
 TCGA-GN-A262-06  
 TCGA-EE-A17Z-06  
 TCGA-EE-A29E-06  
 TCGA-D3-A1QA-07  
 TCGA-D9-A4Z6-06  
 TCGA-D3-A8GI-06  
 TCGA-DA-A1IA-06  
 TCGA-GN-A4U7-06  
 TCGA-GN-A8LL-06  
 TCGA-GN-A8LK-06

# PRDM7

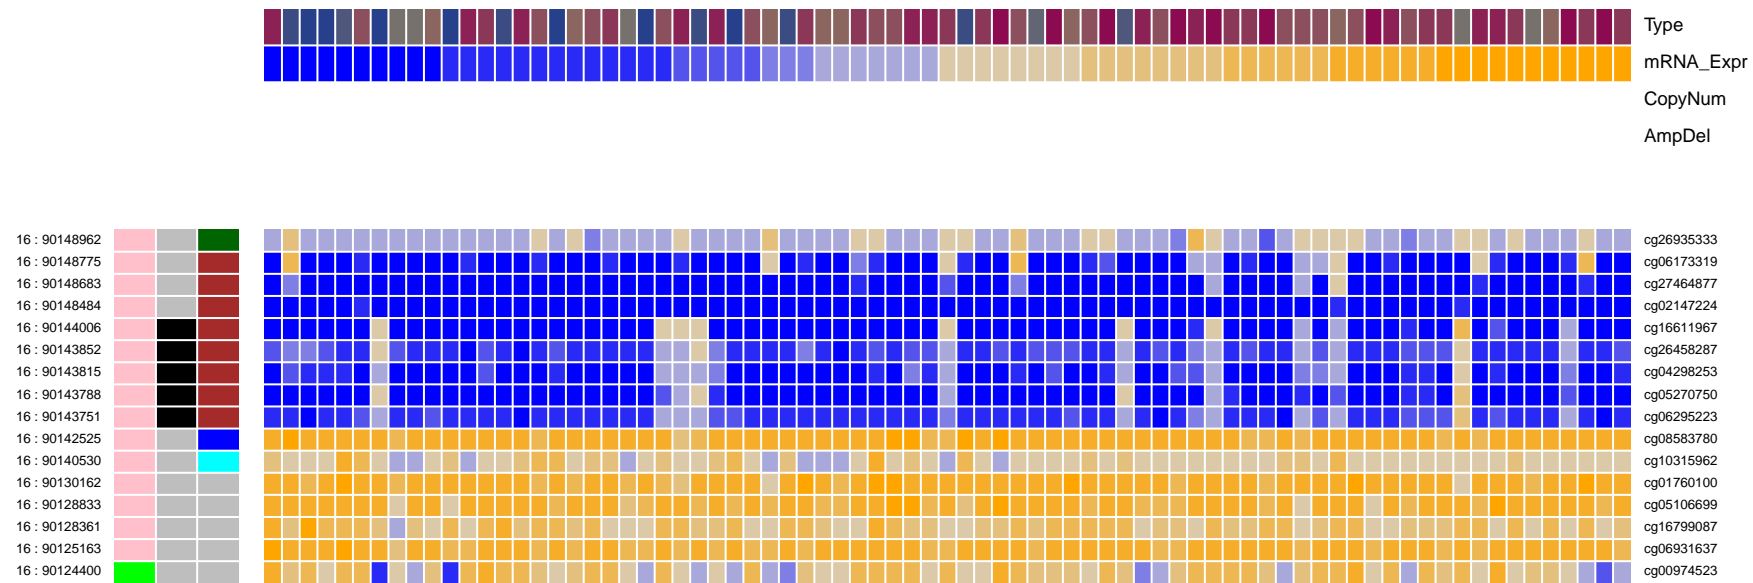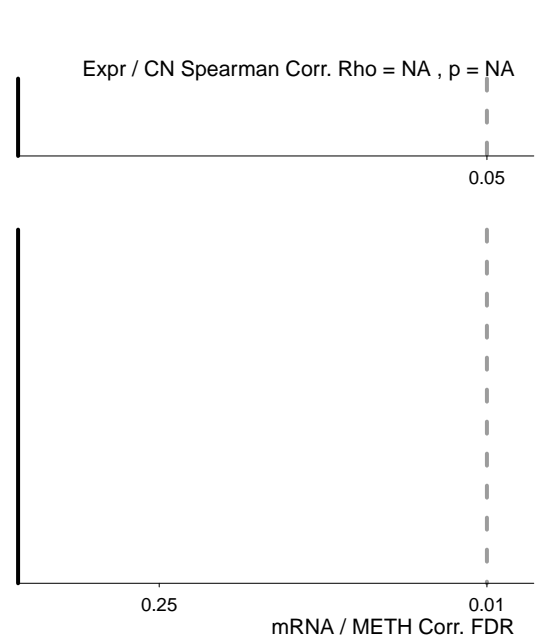

GeneLoc  
PromoterAssoc  
CpGIsland

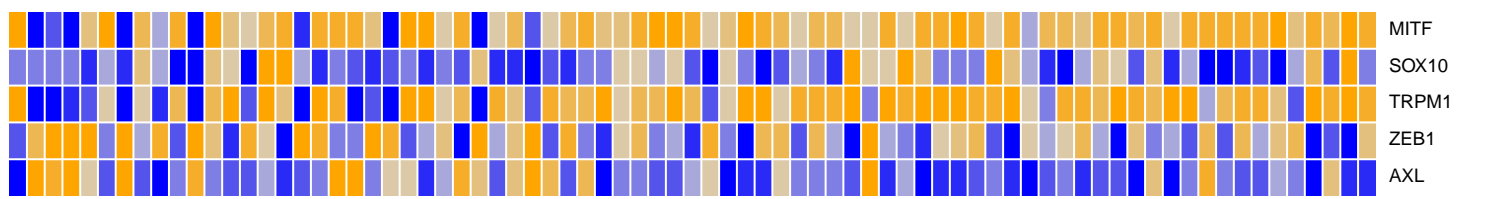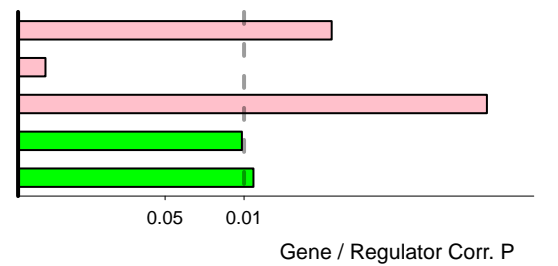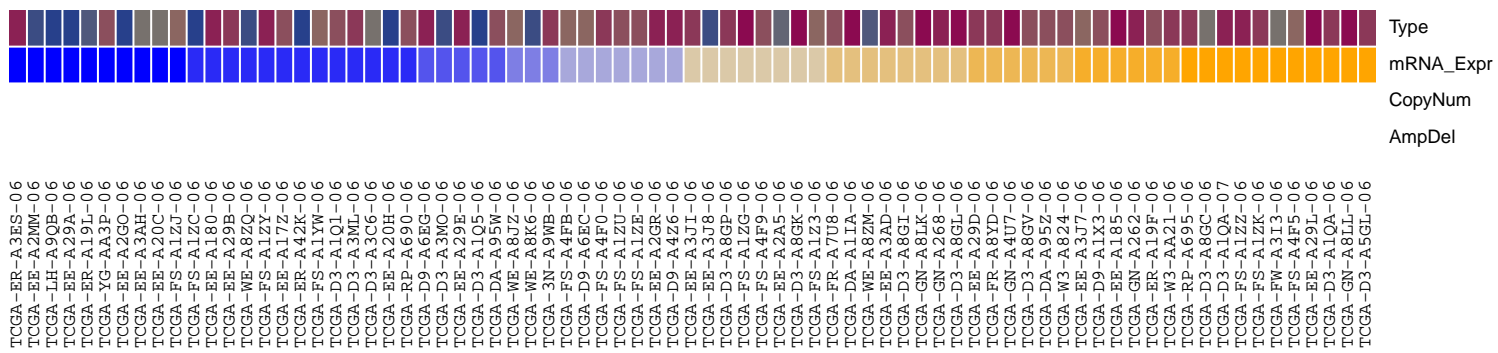

TCGA-ER-A3ES-06  
TCGA-EE-A2MM-06  
TCGA-LH-A9QB-06  
TCGA-EE-A29A-06  
TCGA-ER-A19L-06  
TCGA-YG-AA3P-06  
TCGA-EE-A2GO-06  
TCGA-EE-A3AH-06  
TCGA-EE-A20C-06  
TCGA-PS-A1ZJ-06  
TCGA-EE-A180-06  
TCGA-EE-A29B-06  
TCGA-WE-A8ZO-06  
TCGA-PS-A1ZY-06  
TCGA-EE-A17Z-06  
TCGA-EE-A4ZK-06  
TCGA-PS-A1YK-06  
TCGA-D3-A1QI-06  
TCGA-D3-A3ML-06  
TCGA-EE-A20H-06  
TCGA-EE-A690-06  
TCGA-D9-A6EG-06  
TCGA-D3-A3MO-06  
TCGA-EE-A29E-06  
TCGA-D3-A1Q5-06  
TCGA-DA-A95W-06  
TCGA-WE-A8JZ-06  
TCGA-WE-A8K6-06  
TCGA-3N-A9WE-06  
TCGA-FS-A4FB-06  
TCGA-D9-A6EC-06  
TCGA-FS-A4FO-06  
TCGA-FS-A1ZU-06  
TCGA-EE-A1ZE-06  
TCGA-EE-A2GR-06  
TCGA-D9-A4Z6-06  
TCGA-EE-A3JI-06  
TCGA-EE-A3J8-06  
TCGA-D3-A8GP-06  
TCGA-PS-A1ZG-06  
TCGA-PS-A4F9-06  
TCGA-EE-A2A5-06  
TCGA-D3-A8GK-06  
TCGA-PS-A1Z3-06  
TCGA-PR-A7U8-06  
TCGA-DA-A11A-06  
TCGA-WE-A8ZM-06  
TCGA-EE-A3AD-06  
TCGA-D3-A8GL-06  
TCGA-GN-A8LK-06  
TCGA-GN-A268-06  
TCGA-EE-A29D-06  
TCGA-PR-A8YD-06  
TCGA-GN-A4U7-06  
TCGA-D3-A8GV-06  
TCGA-DA-A95Z-06  
TCGA-W3-A824-06  
TCGA-EE-A3J7-06  
TCGA-D9-A1X3-06  
TCGA-EE-A185-06  
TCGA-GN-A262-06  
TCGA-ER-A19F-06  
TCGA-W3-AA21-06  
TCGA-EE-A695-06  
TCGA-D3-A8GC-06  
TCGA-D3-A1QA-07  
TCGA-FS-A1ZZ-06  
TCGA-PS-A1ZK-06  
TCGA-FW-A1I3-06  
TCGA-PS-A4F5-06  
TCGA-EE-A29L-06  
TCGA-D3-A1QA-06  
TCGA-GN-A8LI-06  
TCGA-D3-A5GI-06

# IL16

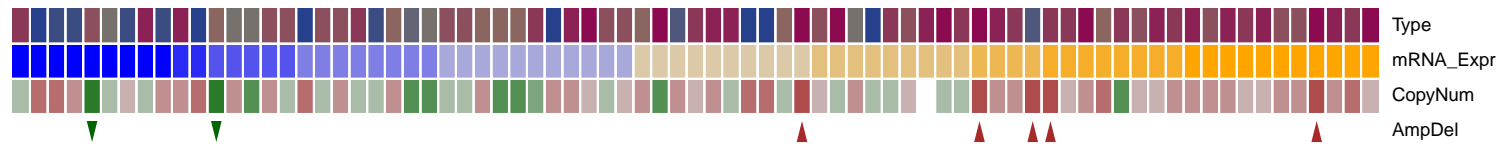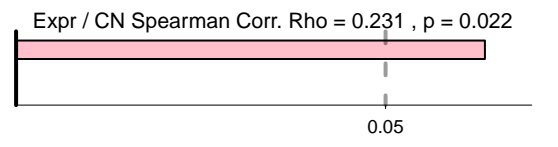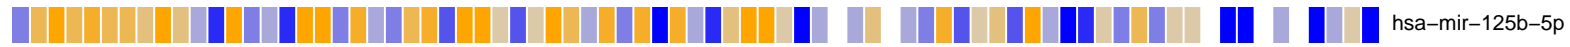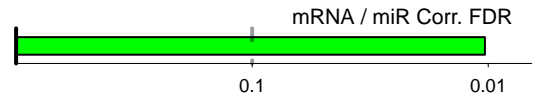

15 : 81453408  
 15 : 81456832  
 15 : 81466841  
 15 : 81468599  
 15 : 81468859  
 15 : 81474451  
 15 : 81475061  
 15 : 81475638  
 15 : 81488168  
 15 : 81488338  
 15 : 81489160  
 15 : 81509050  
 15 : 81528661  
 15 : 81547011  
 15 : 81558344  
 15 : 81567548  
 15 : 81575002  
 15 : 81575055  
 15 : 81586571  
 15 : 81587108  
 15 : 81587493  
 15 : 81589248  
 15 : 81596332  
 15 : 81604544

GeneLoc  
 PromoterAssoc  
 CpGIsland

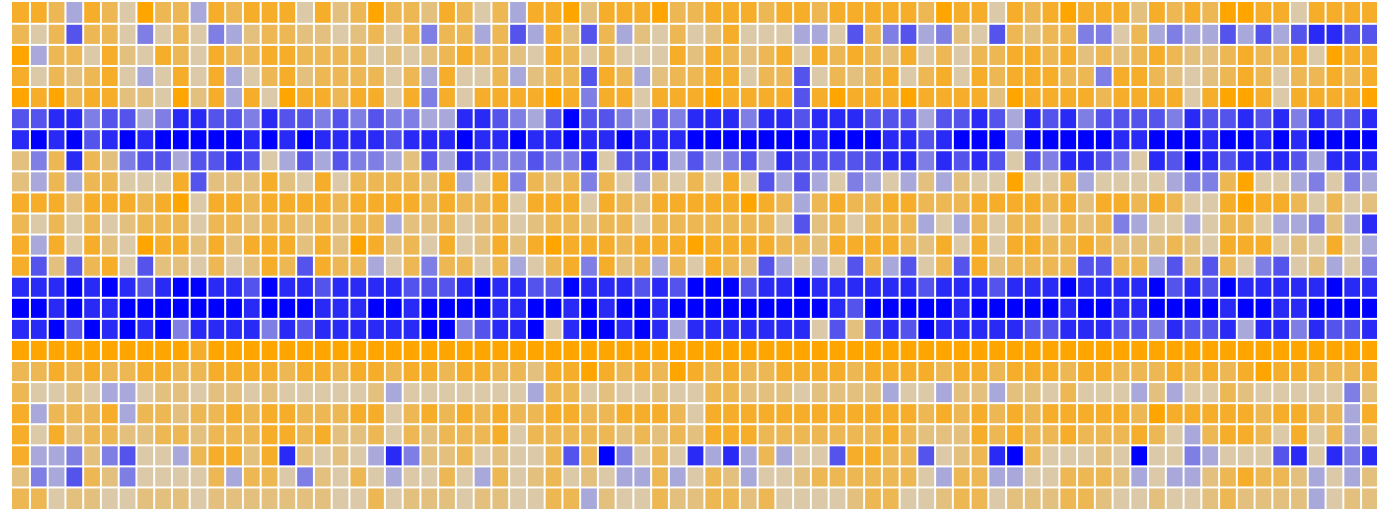

cg05627365  
 cg11442608  
 cg13488011  
 cg00218792  
 cg05617678  
 cg02326224  
 cg26657240  
 cg01001286  
 cg26385554  
 cg20368664  
 cg08255105  
 cg05042034  
 cg11808699  
 cg23729777  
 cg16553427  
 cg23173517  
 cg04518384  
 cg26528791  
 cg18097277  
 cg14899065  
 cg14898127  
 cg13840520  
 cg19620333  
 cg03180322

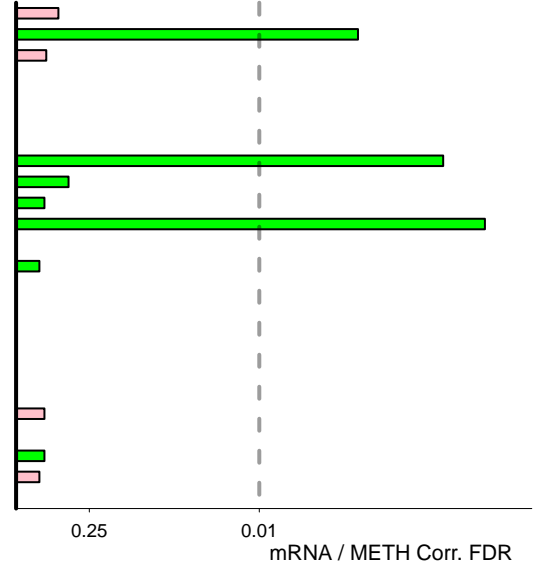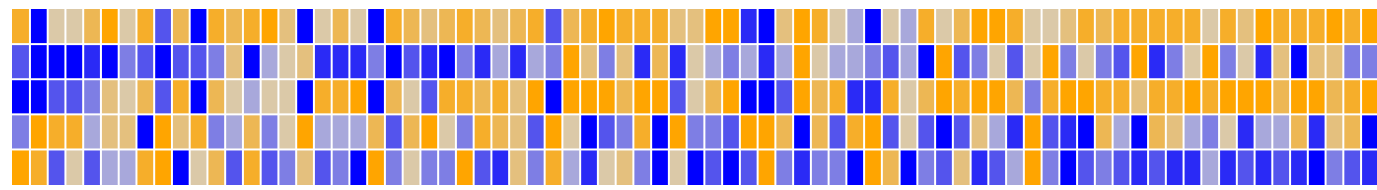

MITF  
 SOX10  
 TRPM1  
 ZEB1  
 AXL

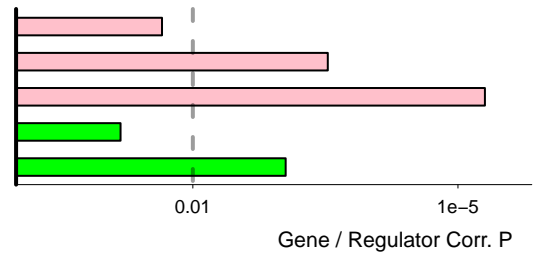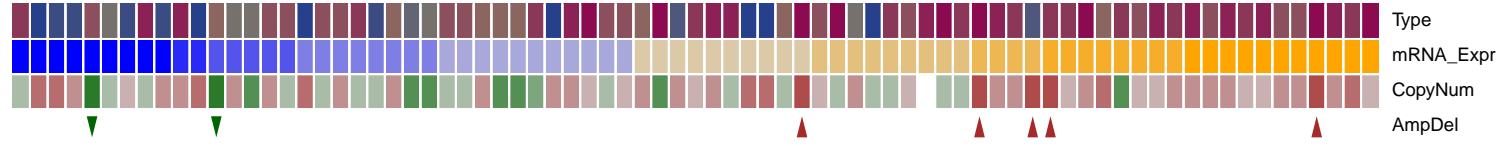

TCGA-D3-A3ML-06  
 TCGA-FS-A1ZC-06  
 TCGA-WE-A8ZQ-06  
 TCGA-EE-A3J8-06  
 TCGA-DA-A95Z-06  
 TCGA-FW-A3I3-06  
 TCGA-D3-A3MO-06  
 TCGA-EE-A29E-06  
 TCGA-WE-A8K6-06  
 TCGA-GN-A262-06  
 TCGA-EE-A20H-06  
 TCGA-D9-A6EC-06  
 TCGA-EE-A3AH-06  
 TCGA-D3-A8GC-06  
 TCGA-YG-A83P-06  
 TCGA-FS-A1ZP-06  
 TCGA-D3-A1O5-06  
 TCGA-DA-A95P-06  
 TCGA-RR-A706-06  
 TCGA-W3-AA2L-06  
 TCGA-EE-A2MM-06  
 TCGA-FS-A1ZU-06  
 TCGA-EE-A2A5-06  
 TCGA-W3-A824-06  
 TCGA-D3-A1Q1-06  
 TCGA-FS-A4FB-06  
 TCGA-EE-A3J7-06  
 TCGA-WE-A8JZ-06  
 TCGA-RR-A695-06  
 TCGA-LH-A9QB-06  
 TCGA-FS-A1ZY-06  
 TCGA-GN-A4U7-06  
 TCGA-RR-A690-06  
 TCGA-FS-A1YF-06  
 TCGA-FS-A1YW-06  
 TCGA-EE-A29L-06  
 TCGA-ER-A19L-06  
 TCGA-D3-A8GP-06  
 TCGA-EE-A2GR-06  
 TCGA-ER-A3ES-06  
 TCGA-EE-A42K-06  
 TCGA-EE-A2G0-06  
 TCGA-FS-A4F5-06  
 TCGA-GN-A8LL-06  
 TCGA-FS-A1ZE-06  
 TCGA-D3-A8CK-06  
 TCGA-EE-A20C-06  
 TCGA-EE-A29A-06  
 TCGA-3N-A9NB-06  
 TCGA-D3-A8GV-06  
 TCGA-D3-A1QA-07  
 TCGA-DA-A1IA-06  
 TCGA-D3-A1QA-06  
 TCGA-D3-A8GL-06  
 TCGA-D9-A4Z6-06  
 TCGA-EE-A3JL-06  
 TCGA-WE-A8ZM-06  
 TCGA-FR-A8YD-06  
 TCGA-FS-A4F0-06  
 TCGA-EE-A185-06  
 TCGA-FS-A1Z3-06  
 TCGA-FS-A1ZK-06  
 TCGA-EE-A17Z-06  
 TCGA-FS-A1ZZ-06  
 TCGA-D3-A5GL-06  
 TCGA-EE-A3AD-06  
 TCGA-D3-A8GI-06  
 TCGA-GN-A268-06  
 TCGA-EE-A29B-06  
 TCGA-D9-A6EG-06  
 TCGA-D9-A1X3-06  
 TCGA-FS-A4F9-06  
 TCGA-GN-A8LK-06  
 TCGA-EE-A180-06  
 TCGA-EE-A29D-06  
 TCGA-FS-A1ZG-06

# FMN1

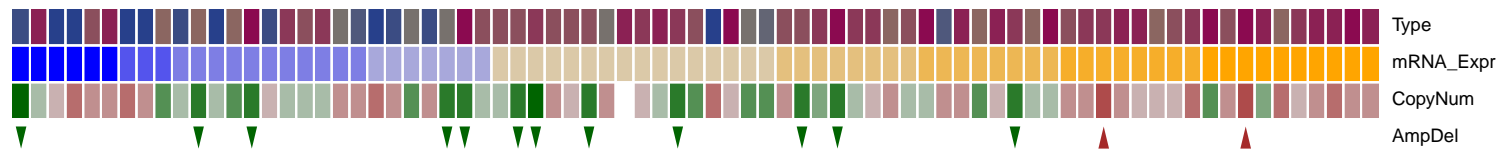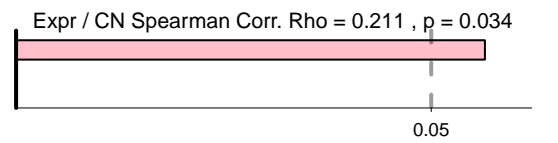

15 : 33487631  
 15 : 33487289  
 15 : 33487120  
 15 : 33487058  
 15 : 33486937  
 15 : 33486727  
 15 : 33484389  
 15 : 33472351  
 15 : 33424752  
 15 : 33418895  
 15 : 33406111  
 15 : 33384751  
 15 : 33360901  
 15 : 33360485  
 15 : 33360353  
 15 : 33360271  
 15 : 33360262  
 15 : 33360214  
 15 : 33360195  
 15 : 33359788  
 15 : 33320928  
 15 : 33300472  
 15 : 33266926  
 15 : 33259575  
 15 : 33251279  
 15 : 33245281  
 15 : 33235802  
 15 : 33211107  
 15 : 33195247  
 15 : 33191698  
 15 : 33179514  
 15 : 33177867  
 15 : 33171339  
 15 : 33165563  
 15 : 33162876  
 15 : 33154262  
 15 : 33148913  
 15 : 33143407  
 15 : 33131642  
 15 : 33125028  
 15 : 33111288  
 15 : 33080435  
 15 : 33066894

GeneLoc  
 PromoterAssoc  
 CpGIsland

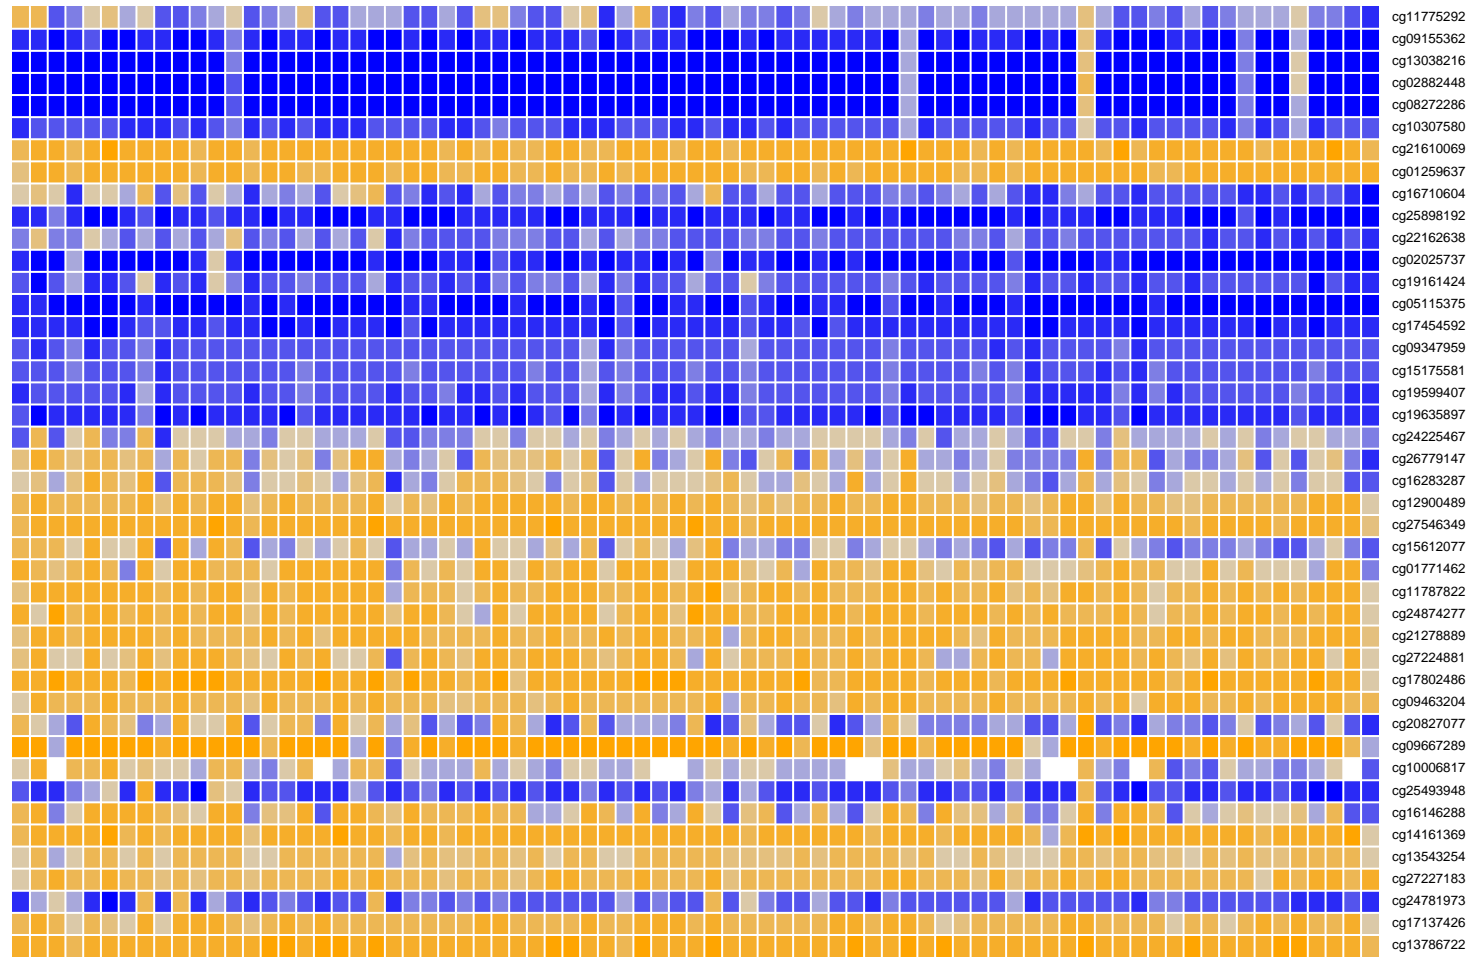

cg11775292  
 cg09155362  
 cg13038216  
 cg02882448  
 cg08272286  
 cg10307580  
 cg21610069  
 cg01259637  
 cg16710604  
 cg25898192  
 cg22162638  
 cg02025737  
 cg19161424  
 cg05115375  
 cg17454592  
 cg09347959  
 cg15175581  
 cg19599407  
 cg19635897  
 cg24225467  
 cg26779147  
 cg16283287  
 cg12900489  
 cg27546349  
 cg15612077  
 cg01771462  
 cg11787822  
 cg24874277  
 cg21278889  
 cg27224881  
 cg17802486  
 cg09463204  
 cg20827077  
 cg09667289  
 cg10006817  
 cg25493948  
 cg16146288  
 cg14161369  
 cg13543254  
 cg27227183  
 cg24781973  
 cg17137426  
 cg13786722

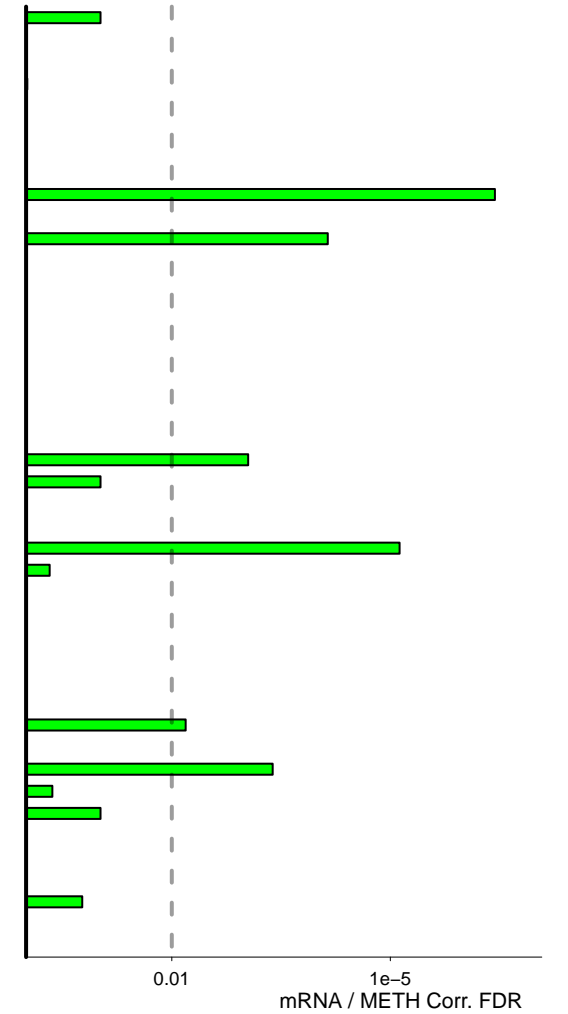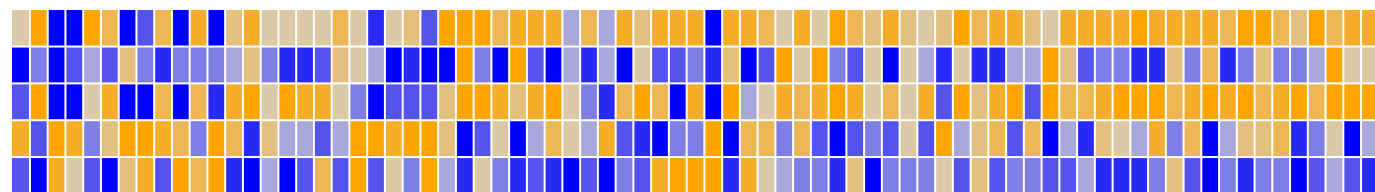

MITF  
 SOX10  
 TRPM1  
 ZEB1  
 AXL

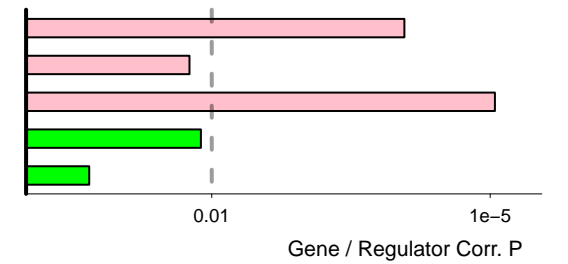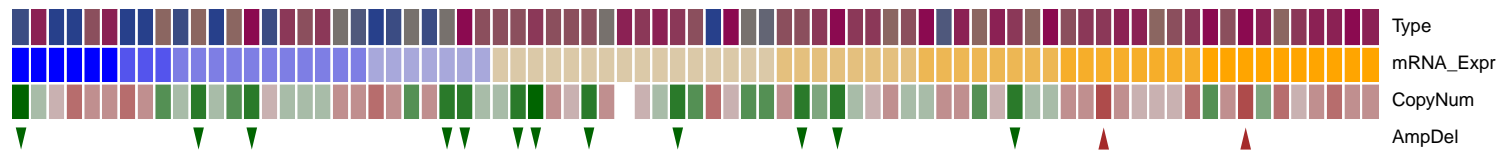

TCGA-WE-A8ZQ-06  
 TCGA-ER-A3ES-06  
 TCGA-FS-A1ZC-06  
 TCGA-EE-A20H-06  
 TCGA-YG-AA3P-06  
 TCGA-GN-A262-06  
 TCGA-D3-A105-06  
 TCGA-LH-A90B-06  
 TCGA-FS-A4FB-06  
 TCGA-EE-A2NM-06  
 TCGA-D9-A6BC-06  
 TCGA-EE-A29A-06  
 TCGA-EE-A3J7-06  
 TCGA-GN-A8LK-06  
 TCGA-D3-A3MO-06  
 TCGA-W3-AA21-06  
 TCGA-DA-A95W-06  
 TCGA-3N-A9PB-06  
 TCGA-EE-A3AH-06  
 TCGA-WE-A8ZM-06  
 TCGA-ER-A4ZK-06  
 TCGA-EE-A3J8-06  
 TCGA-D3-A3C6-06  
 TCGA-WE-A8K6-06  
 TCGA-FW-A3T3-06  
 TCGA-GN-A8LL-06  
 TCGA-RP-A690-06  
 TCGA-W3-A824-06  
 TCGA-EE-A17Z-06  
 TCGA-FS-A1ZK-06  
 TCGA-FS-A4F9-06  
 TCGA-D3-A8GV-06  
 TCGA-DA-A95Z-06  
 TCGA-EE-A20C-06  
 TCGA-D3-A10A-07  
 TCGA-EE-A29B-06  
 TCGA-EE-A29E-06  
 TCGA-D3-A3ML-06  
 TCGA-D3-A101-06  
 TCGA-EE-A2GO-06  
 TCGA-GN-A4U7-06  
 TCGA-D3-A8GC-06  
 TCGA-EE-A2A5-06  
 TCGA-D3-A8GI-06  
 TCGA-FS-A1ZE-06  
 TCGA-FR-A8YD-06  
 TCGA-FS-A1ZG-06  
 TCGA-D3-A10A-06  
 TCGA-D3-A8GP-06  
 TCGA-FS-A1ZU-06  
 TCGA-FS-A1ZU-06  
 TCGA-D3-A8GK-06  
 TCGA-ER-A19L-06  
 TCGA-D9-A4Z6-06  
 TCGA-WE-A8JZ-06  
 TCGA-FS-A1ZZ-06  
 TCGA-RP-A695-06  
 TCGA-FS-A4F5-06  
 TCGA-DA-A1IA-06  
 TCGA-D9-A1X3-06  
 TCGA-EE-A3JI-06  
 TCGA-D3-A5GL-06  
 TCGA-GN-A268-06  
 TCGA-D9-A6E3-06  
 TCGA-FS-A1YW-06  
 TCGA-ER-A19F-06  
 TCGA-EE-A29D-06  
 TCGA-EE-A29L-06  
 TCGA-FR-A7U8-06  
 TCGA-D3-A8GL-06  
 TCGA-EE-A180-06  
 TCGA-FS-A1Z3-06  
 TCGA-FS-A4FO-06  
 TCGA-EE-A2GR-06  
 TCGA-FS-A1ZY-06  
 TCGA-EE-A185-06  
 TCGA-EE-A3AD-06

# P2RX7

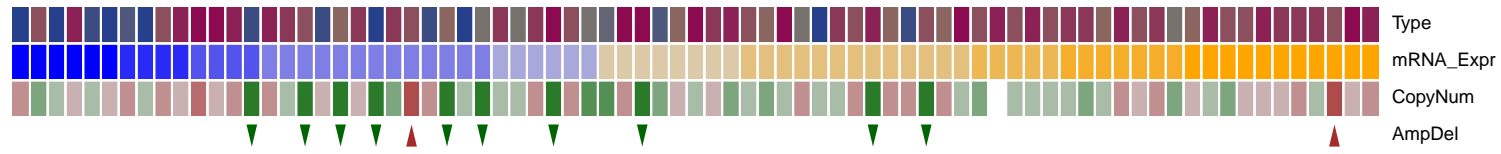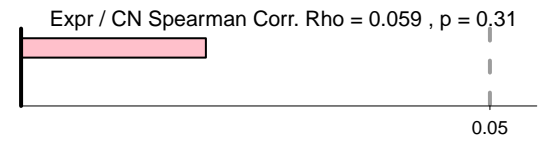

12 : 121570081  
 12 : 121570571  
 12 : 121570616  
 12 : 121570677  
 12 : 121570752  
 12 : 121570875  
 12 : 121571068  
 12 : 121615078  
 12 : 121615201  
 12 : 121622315

GeneLoc  
 PromoterAssoc  
 CpIsland

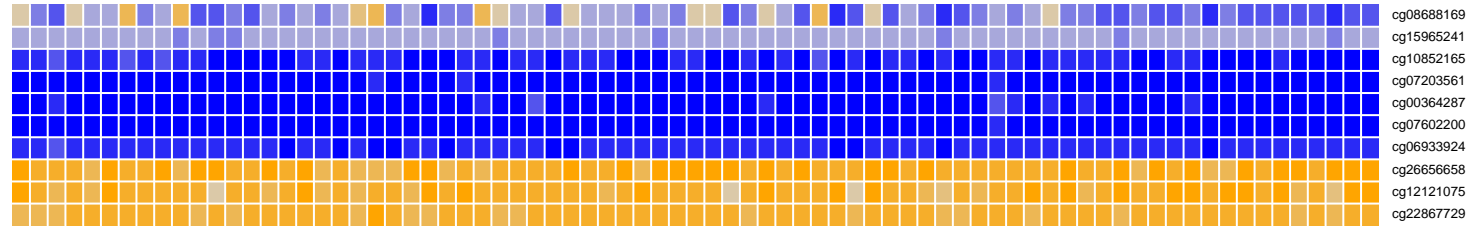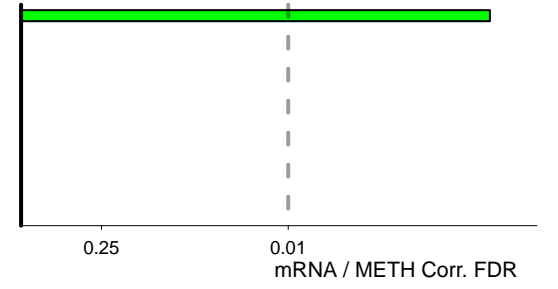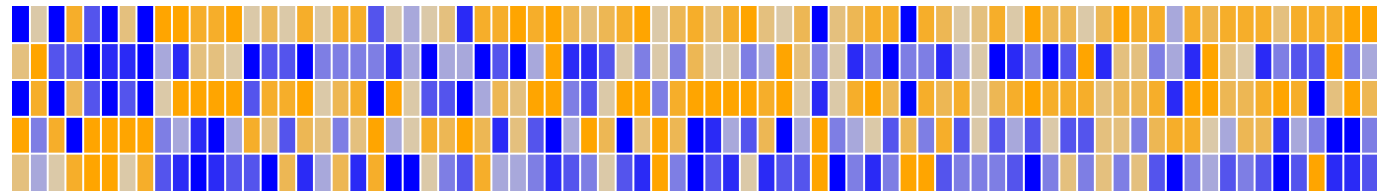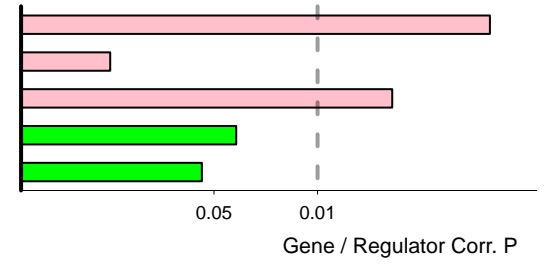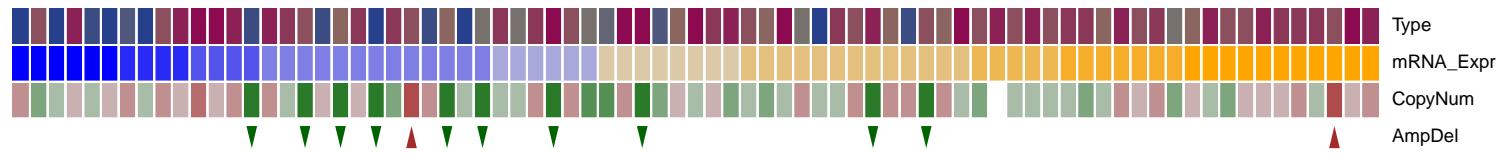

TCGA-D3-A1Q5-06  
 TCGA-D3-A8G1-06  
 TCGA-EE-A20H-06  
 TCGA-EE-A29E-06  
 TCGA-WE-A8K6-06  
 TCGA-EE-A2GO-06  
 TCGA-ER-A19L-06  
 TCGA-FS-A1ZC-06  
 TCGA-YG-AA3P-06  
 TCGA-D9-A6FG-06  
 TCGA-GN-A8LK-06  
 TCGA-GN-A4H7-06  
 TCGA-D9-A4Z6-06  
 TCGA-WE-A8Z0-06  
 TCGA-GN-A2Z2-06  
 TCGA-3N-A9NE-06  
 TCGA-FS-A4F8-06  
 TCGA-D3-A3W0-06  
 TCGA-D9-A6EC-06  
 TCGA-D3-A5GL-06  
 TCGA-LH-A9QB-06  
 TCGA-W3-AAJ1-06  
 TCGA-D3-A8GV-06  
 TCGA-EE-A3J8-06  
 TCGA-FS-A4F5-06  
 TCGA-ER-A4ZK-06  
 TCGA-D3-A8CC-06  
 TCGA-EE-A3JI-06  
 TCGA-FW-A3I3-06  
 TCGA-RP-A695-06  
 TCGA-GN-A8LL-06  
 TCGA-DA-A95Z-06  
 TCGA-D3-A3C6-06  
 TCGA-EE-A2A5-06  
 TCGA-EE-A185-06  
 TCGA-D3-A8GL-06  
 TCGA-WE-A8ZM-06  
 TCGA-FS-A1Z3-06  
 TCGA-EE-A29L-06  
 TCGA-EE-A29B-06  
 TCGA-EE-A3AD-06  
 TCGA-RP-A690-06  
 TCGA-EE-A3J7-06  
 TCGA-DA-A1IA-06  
 TCGA-EE-A29A-06  
 TCGA-EE-A3AH-06  
 TCGA-D3-A8GP-06  
 TCGA-PR-A7U8-06  
 TCGA-GN-A268-06  
 TCGA-FS-A1Z1-06  
 TCGA-FS-A2MM-06  
 TCGA-D3-A1Q1-06  
 TCGA-FS-A4FB-06  
 TCGA-D3-A8GK-06  
 TCGA-FS-A1ZU-06  
 TCGA-D3-A1QA-07  
 TCGA-DA-A95W-06  
 TCGA-ER-A3ES-06  
 TCGA-W3-A824-06  
 TCGA-D3-A1QA-06  
 TCGA-FR-A8YD-06  
 TCGA-WE-A8JZ-06  
 TCGA-EE-A180-06  
 TCGA-ER-A19F-06  
 TCGA-EE-A23D-06  
 TCGA-EE-A20C-06  
 TCGA-FS-A1YW-06  
 TCGA-FS-A1ZY-06  
 TCGA-D9-A1X3-06  
 TCGA-FS-A1ZE-06  
 TCGA-FS-A1ZZ-06  
 TCGA-FS-A4F0-06  
 TCGA-FS-A1ZK-06  
 TCGA-D3-A3ML-06  
 TCGA-EE-A1Z2-06  
 TCGA-FS-A1ZG-06  
 TCGA-EE-A2GR-06

# MBP

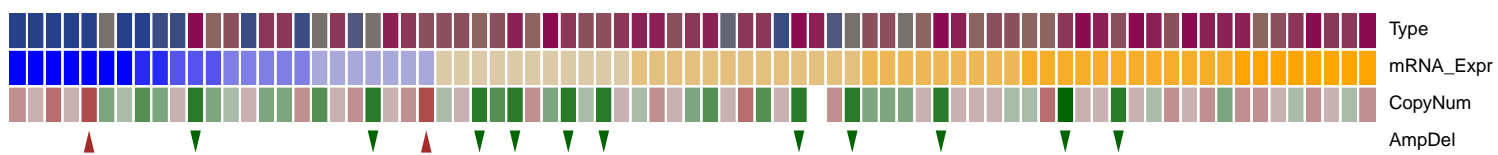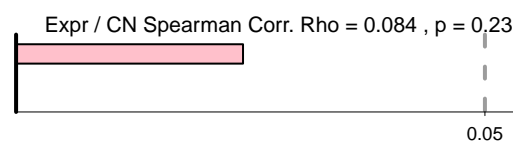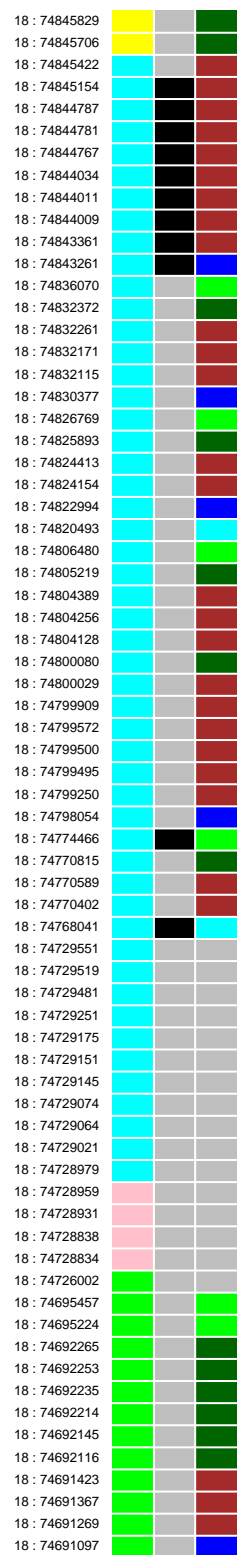

GeneLoc  
PromoterAssoc  
CpGIsland

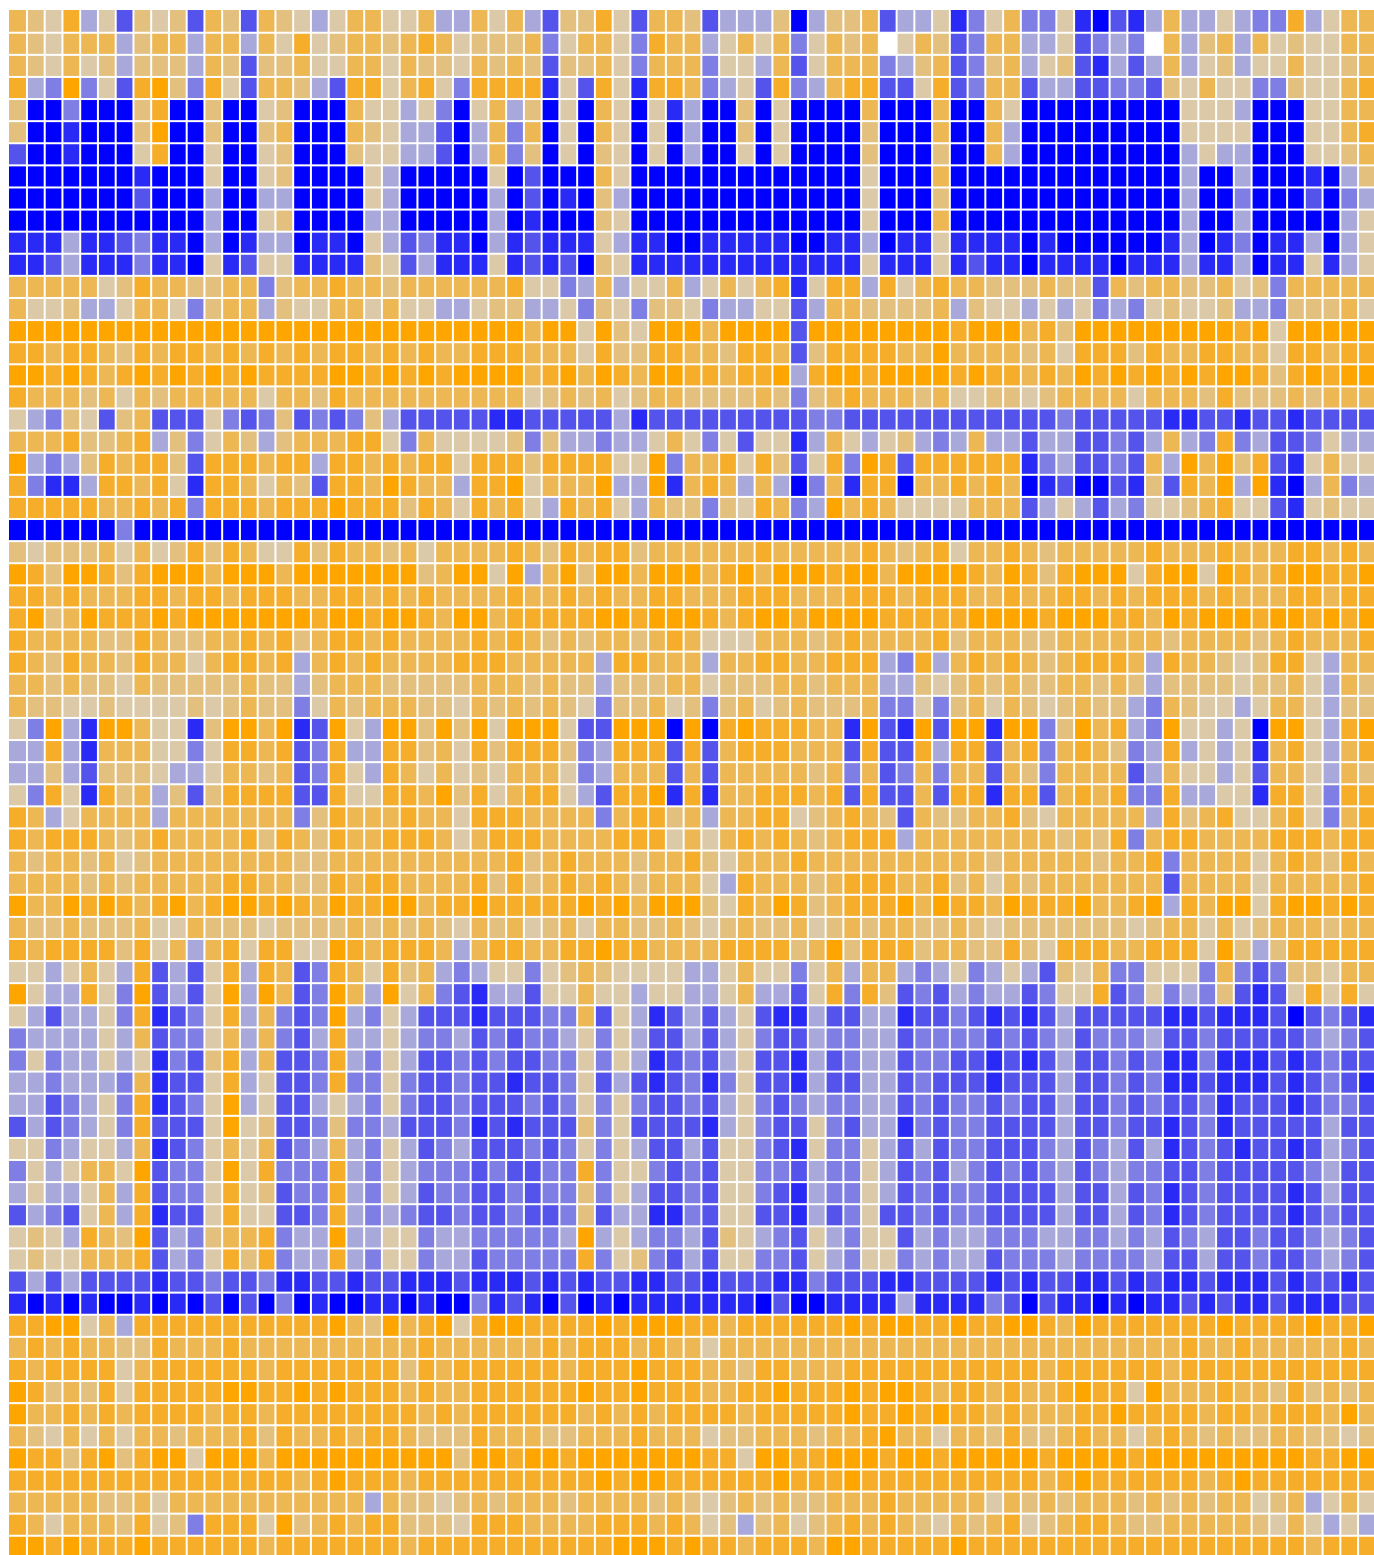

cg16604566  
cg11984636  
cg12555907  
cg00366917  
cg27180880  
cg25887236  
cg20801056  
cg22228783  
cg18362936  
cg05616792  
cg23529390  
cg15462468  
cg19310162  
cg25332502  
cg16990945  
cg21116087  
cg00989538  
cg16893707  
cg27262850  
cg21261487  
cg25389087  
cg07637837  
cg26358590  
cg16762684  
cg18792727  
cg07165529  
cg19276655  
cg25743490  
cg23319171  
cg23470914  
cg15407373  
cg08737246  
cg17266581  
cg11598403  
cg13572782  
cg17199181  
cg24446429  
cg25503999  
cg13852093  
cg07006718  
cg21655444  
cg13583535  
cg03560685  
cg00187503  
cg07611666  
cg22239325  
cg13141061  
cg15495463  
cg06548292  
cg14298244  
cg15224291  
cg23327011  
cg13442966  
cg21107579  
cg23975646  
cg21322241  
cg27240008  
cg06773488  
cg20074021  
cg22168512  
cg06676603  
cg13375905  
cg00839132  
cg25805393  
cg17061340  
cg00706570  
cg15391531  
cg15352683  
cg25916714  
cg19178876

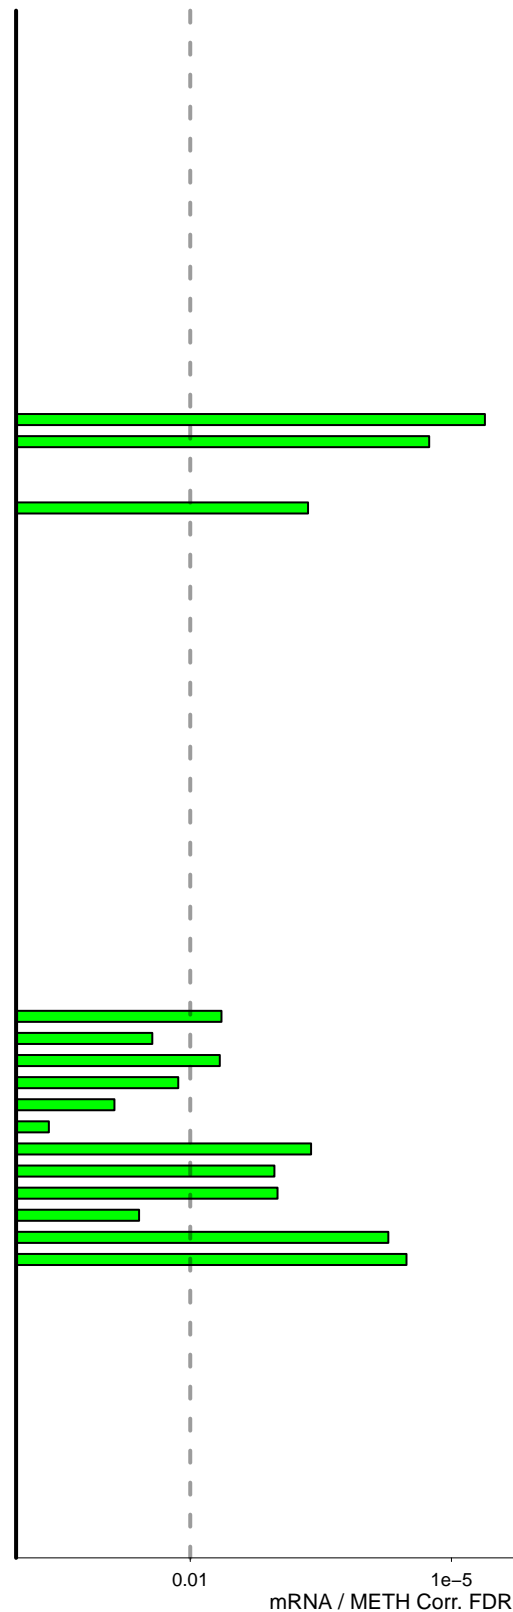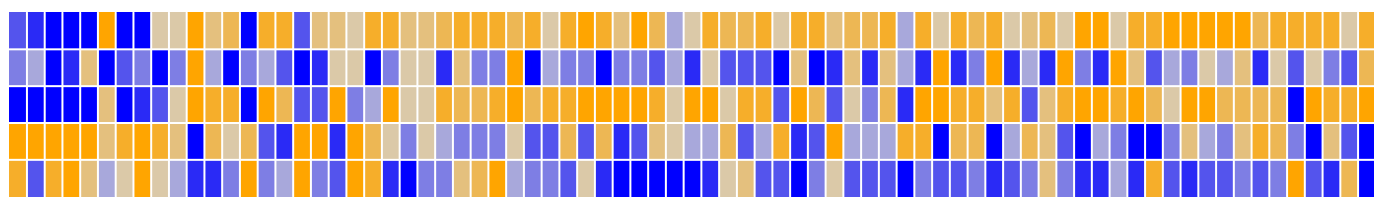

MITF  
SOX10  
TRPM1  
ZEB1  
AXL

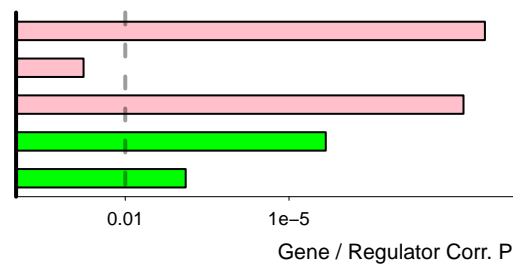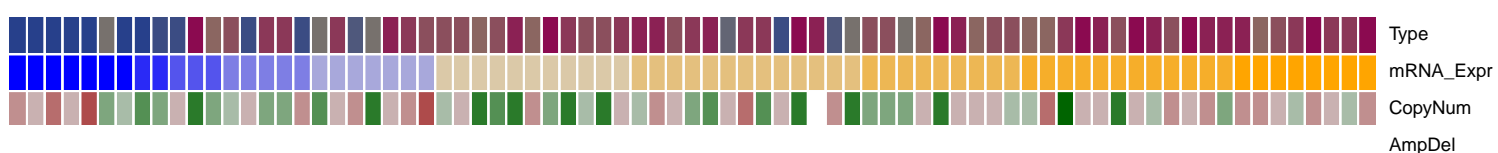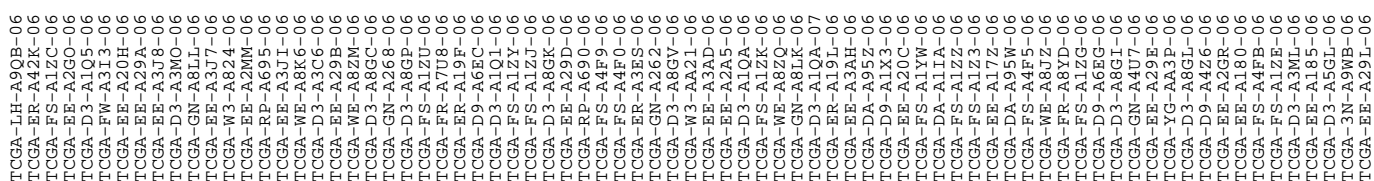

TCGA-LH-A9QB-06  
TCGA-ER-A42K-06  
TCGA-FS-A1ZC-06  
TCGA-EE-A2GO-06  
TCGA-D3-A1Q5-06  
TCGA-FW-A313-06  
TCGA-EE-A20H-06  
TCGA-EE-A29A-06  
TCGA-EE-A318-06  
TCGA-D3-A3MO-06  
TCGA-GN-A81L-06  
TCGA-EE-A317-06  
TCGA-W3-A824-06  
TCGA-EE-A2MM-06  
TCGA-RP-A69F-06  
TCGA-EE-A31I-06  
TCGA-WE-A8YI-06  
TCGA-D3-A3G6-06  
TCGA-EE-A29F-06  
TCGA-WE-A8ZM-06  
TCGA-D3-A8GC-06  
TCGA-GN-A268-06  
TCGA-D3-A8GP-06  
TCGA-FR-A7U8-06  
TCGA-ER-A19F-06  
TCGA-D3-A1Q1-06  
TCGA-D9-A6EC-06  
TCGA-FS-A1ZJ-06  
TCGA-FS-A1ZJ-06  
TCGA-D3-A8GK-06  
TCGA-EE-A29D-06  
TCGA-RP-A690-06  
TCGA-FS-A4F9-06  
TCGA-ER-A3ES-06  
TCGA-GN-A262-06  
TCGA-D3-A8GV-06  
TCGA-W3-AA21-06  
TCGA-EE-A3AD-06  
TCGA-EE-A2A5-06  
TCGA-D3-A1QA-06  
TCGA-FS-A1ZK-06  
TCGA-WE-A8ZQ-06  
TCGA-GN-A81K-06  
TCGA-D3-A1QA-07  
TCGA-ER-A19I-06  
TCGA-EE-A3AH-06  
TCGA-DA-A95Z-06  
TCGA-D9-A1Y3-06  
TCGA-EE-A2JC-06  
TCGA-FS-A1YV-06  
TCGA-FS-A1YV-06  
TCGA-DA-A1IA-06  
TCGA-FS-A1ZL-06  
TCGA-EE-A17Z-06  
TCGA-DA-A95W-06  
TCGA-FS-A4F5-06  
TCGA-WE-A8JZ-06  
TCGA-FR-A8YD-06  
TCGA-FS-A1ZG-06  
TCGA-D9-A6EG-06  
TCGA-D3-A8GI-06  
TCGA-GN-A4U7-06  
TCGA-EE-A29E-06  
TCGA-YG-AA3P-06  
TCGA-D3-A8GL-06  
TCGA-EE-A2GR-06  
TCGA-EE-A180-06  
TCGA-FS-A4FB-06  
TCGA-FS-A1ZE-06  
TCGA-D3-A3ML-06  
TCGA-EE-A185-06  
TCGA-D3-A5GL-06  
TCGA-3N-A9WB-06  
TCGA-EE-A29L-06



# IVNS1ABP

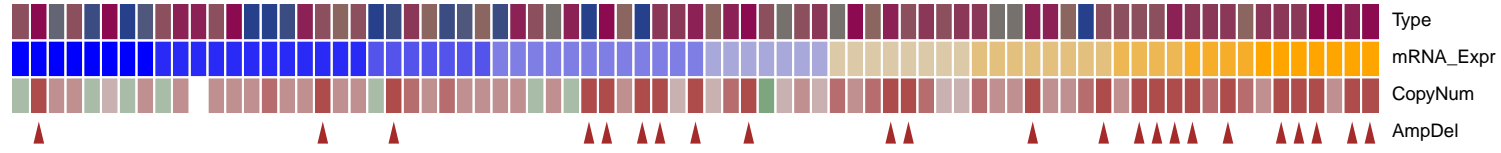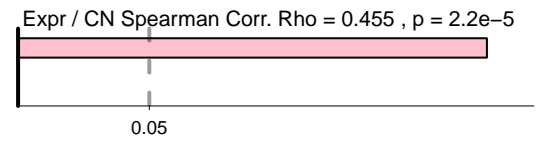

1 : 185287148  
 1 : 185286996  
 1 : 185286807  
 1 : 185286722  
 1 : 185286696  
 1 : 185286635  
 1 : 185286520  
 1 : 185286462  
 1 : 185286441  
 1 : 185286075  
 1 : 185285846  
 1 : 185285600  
 1 : 185285595  
 1 : 185285364  
 1 : 185283071  
 1 : 185270682

GeneLoc  
 PromoterAssoc  
 CpGIsland

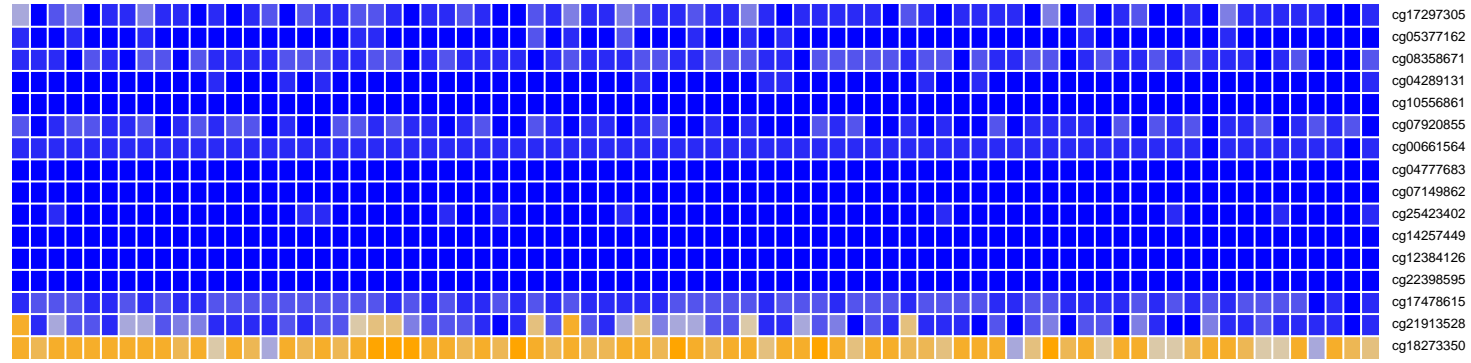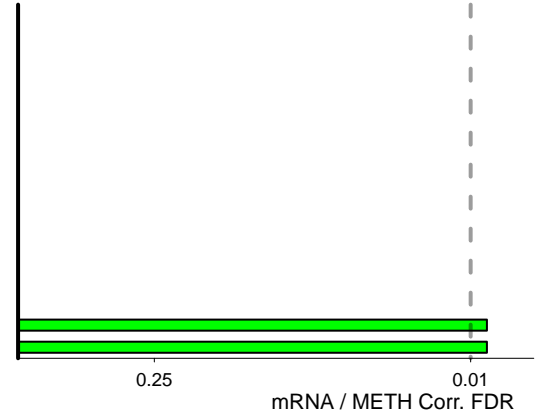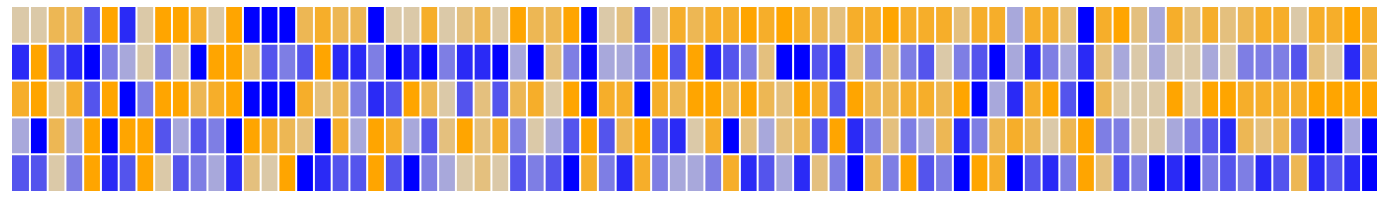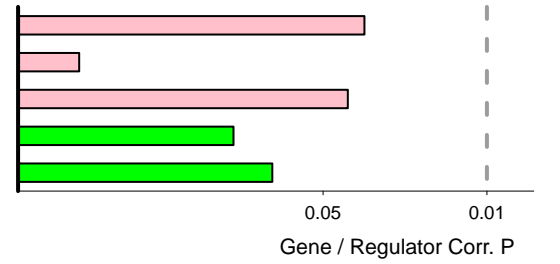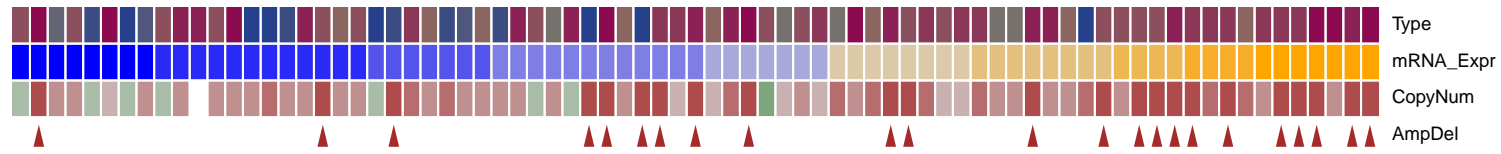

TCGA-DA-A95W-06  
 TCGA-DA-A11A-06  
 TCGA-EE-A2A5-06  
 TCGA-FR-A7U8-06  
 TCGA-WE-A8K6-06  
 TCGA-FS-A1ZG-06  
 TCGA-ER-A42K-06  
 TCGA-WE-A82M-06  
 TCGA-RP-A690-06  
 TCGA-D9-A4Z6-06  
 TCGA-D3-A1O2-07  
 TCGA-D3-A8GI-06  
 TCGA-GN-A8LI-06  
 TCGA-D3-A1O5-06  
 TCGA-EE-A20H-06  
 TCGA-EE-A2MM-06  
 TCGA-GN-A2E2-06  
 TCGA-EE-A17Z-06  
 TCGA-FS-A4EB-06  
 TCGA-DA-A95Z-06  
 TCGA-EE-A29A-06  
 TCGA-WE-A8ZQ-06  
 TCGA-W3-AA21-06  
 TCGA-FS-A1ZJ-06  
 TCGA-ER-A19L-06  
 TCGA-WE-A8JZ-06  
 TCGA-EE-A3J8-06  
 TCGA-EE-A2GR-06  
 TCGA-W3-A824-06  
 TCGA-EE-A3AH-06  
 TCGA-ER-A3ES-06  
 TCGA-FS-A1ZC-06  
 TCGA-D3-A8GK-06  
 TCGA-EE-A3J7-06  
 TCGA-LH-A9QB-06  
 TCGA-FR-A8YD-06  
 TCGA-EE-A3JI-06  
 TCGA-FS-A1ZY-06  
 TCGA-FS-A1YW-06  
 TCGA-EE-A29E-06  
 TCGA-D3-A8GL-06  
 TCGA-D9-A1X3-06  
 TCGA-FW-A1I3-06  
 TCGA-FS-A4F9-06  
 TCGA-D3-A1O2-06  
 TCGA-D3-A3C6-06  
 TCGA-GN-A8LX-06  
 TCGA-D9-A6EC-06  
 TCGA-EE-A180-06  
 TCGA-D3-A1Z1-06  
 TCGA-FS-A1ZK-06  
 TCGA-FS-A1ZE-06  
 TCGA-FS-A4F0-06  
 TCGA-D3-A3ML-06  
 TCGA-EE-A20C-06  
 TCGA-FS-A1ZZ-06  
 TCGA-EE-A268-06  
 TCGA-FS-A4F5-06  
 TCGA-EE-A2GO-06  
 TCGA-ER-A19F-06  
 TCGA-YG-AA3P-06  
 TCGA-FS-A1ZU-06  
 TCGA-EE-A3AD-06  
 TCGA-D3-A8GF-06  
 TCGA-RP-A695-06  
 TCGA-EE-A29B-06  
 TCGA-FS-A1Z3-06  
 TCGA-D3-A5GL-06  
 TCGA-EE-A29D-06  
 TCGA-3N-A9WB-06  
 TCGA-GN-A4U7-06  
 TCGA-EE-A185-06  
 TCGA-D9-A6EG-06  
 TCGA-EE-A29I-06

# SLC16A6

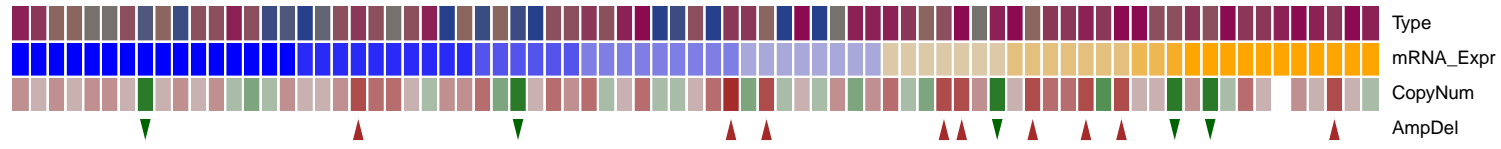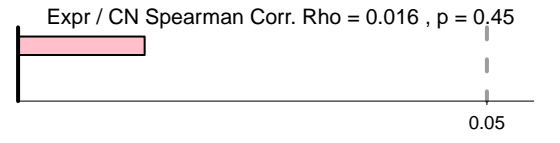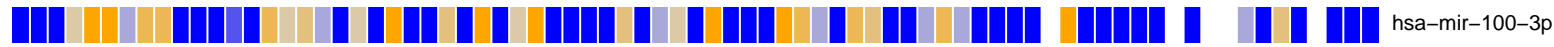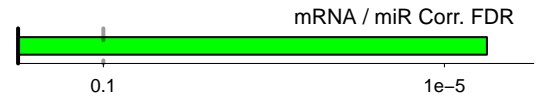

17 : 66288795  
 17 : 66288529  
 17 : 66287915  
 17 : 66287913  
 17 : 66287507  
 17 : 66287505  
 17 : 66287499  
 17 : 66287369  
 17 : 66287071  
 17 : 66287032  
 17 : 66286993  
 17 : 66286791  
 17 : 66286394  
 17 : 66286371  
 17 : 66286298  
 17 : 66283994  
 17 : 66270134

GeneLoc  
 PromoterAssoc  
 CpGIsland

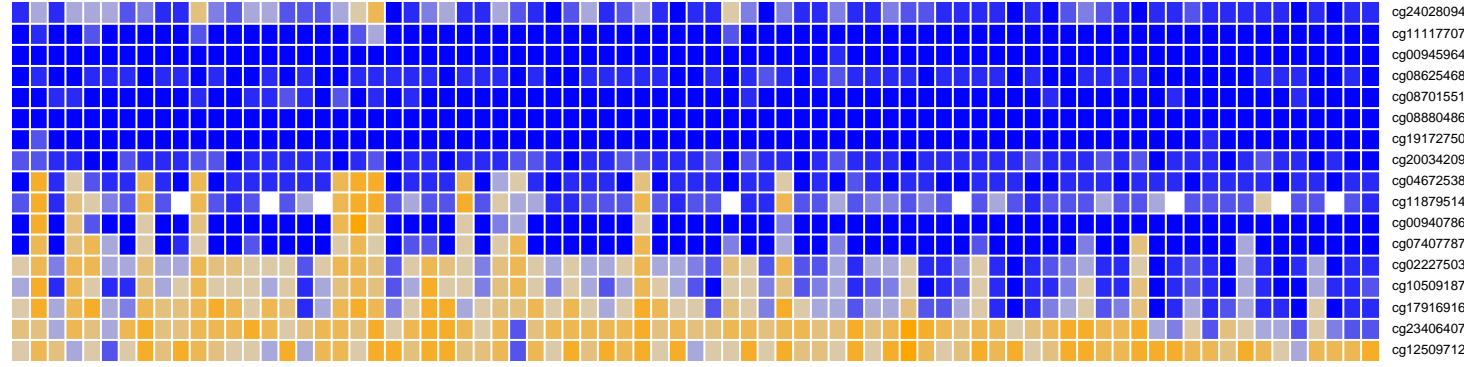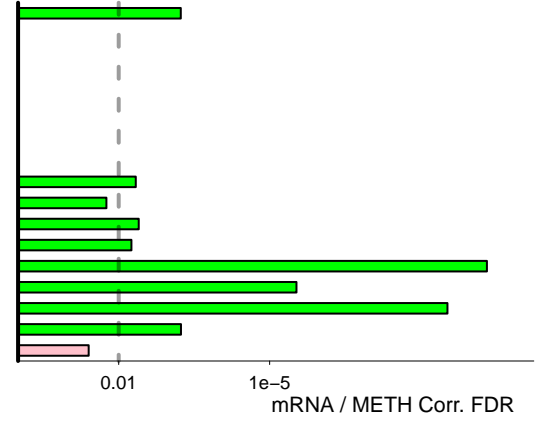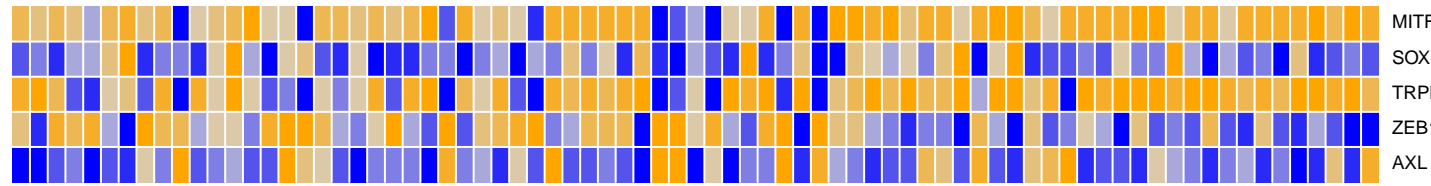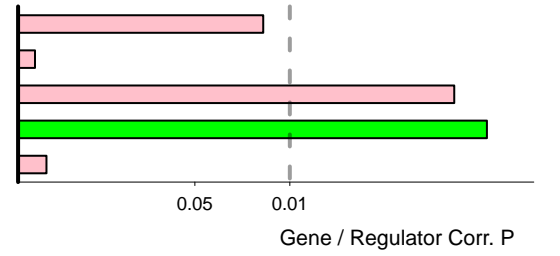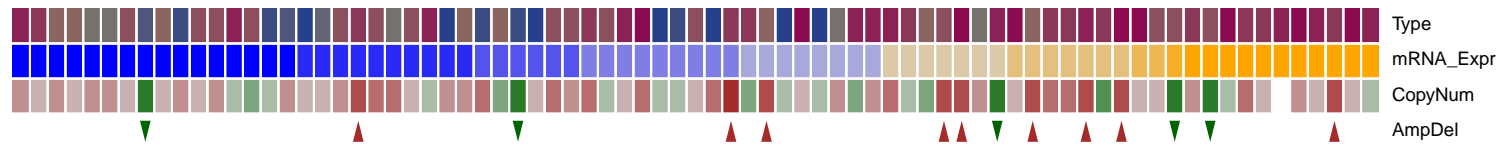

TCGA-GN-A262-06  
 TCGA-FS-AAF0-06  
 TCGA-FS-AAFB-06  
 TCGA-FS-AAF5-06  
 TCGA-EE-A20C-06  
 TCGA-EE-A3AH-06  
 TCGA-EE-A17Z-06  
 TCGA-ER-A19L-06  
 TCGA-FS-A1Z3-06  
 TCGA-EE-A2MM-06  
 TCGA-DA-A95W-06  
 TCGA-FS-A1ZU-06  
 TCGA-FS-A1ZY-06  
 TCGA-YG-A83P-06  
 TCGA-WE-A8Z0-06  
 TCGA-WE-A8ZM-06  
 TCGA-D3-A105-06  
 TCGA-EE-A8A5-06  
 TCGA-DA-A85Z-06  
 TCGA-D3-A8GF-06  
 TCGA-W3-A8Z4-06  
 TCGA-D3-A3C6-06  
 TCGA-FR-A7U8-06  
 TCGA-ER-A3ES-06  
 TCGA-LH-A90B-06  
 TCGA-FS-A1ZJ-06  
 TCGA-D3-A3M0-06  
 TCGA-EE-A3J7-06  
 TCGA-ER-A4ZK-06  
 TCGA-D3-A1Q1-06  
 TCGA-D9-A1X3-06  
 TCGA-EE-A29D-06  
 TCGA-FS-A1ZE-06  
 TCGA-FS-A1ZZ-06  
 TCGA-EE-A29L-06  
 TCGA-EE-A2GO-06  
 TCGA-WE-A8K6-06  
 TCGA-D3-A8GV-06  
 TCGA-EE-A20H-06  
 TCGA-W3-AA21-06  
 TCGA-FR-A8YD-06  
 TCGA-FS-A1YW-06  
 TCGA-EE-A29A-06  
 TCGA-GN-A4U7-06  
 TCGA-FW-A3T3-06  
 TCGA-EE-A180-06  
 TCGA-EE-A3AD-06  
 TCGA-EE-A3GB-06  
 TCGA-EE-A39B-06  
 TCGA-D9-A65C-06  
 TCGA-ER-A1PF-06  
 TCGA-DA-A1LA-06  
 TCGA-D3-A8GC-06  
 TCGA-D9-A4Z6-06  
 TCGA-GN-A8LL-06  
 TCGA-WE-A8UZ-06  
 TCGA-3N-A9WB-06  
 TCGA-D3-A3ML-06  
 TCGA-GN-A268-06  
 TCGA-FS-A1ZK-06  
 TCGA-EE-A185-06  
 TCGA-D3-A8GL-06  
 TCGA-RP-A690-06  
 TCGA-D3-A8QI-06  
 TCGA-RP-A695-06  
 TCGA-FS-A4F9-06  
 TCGA-D3-A8GK-06  
 TCGA-EE-A3JI-06  
 TCGA-D3-A5GL-06  
 TCGA-D3-A1QA-07  
 TCGA-GN-A8LK-06  
 TCGA-D9-A6EG-06  
 TCGA-D3-A1QA-06  
 TCGA-FS-A1ZG-06  
 TCGA-EE-A29E-06

# MYEF2

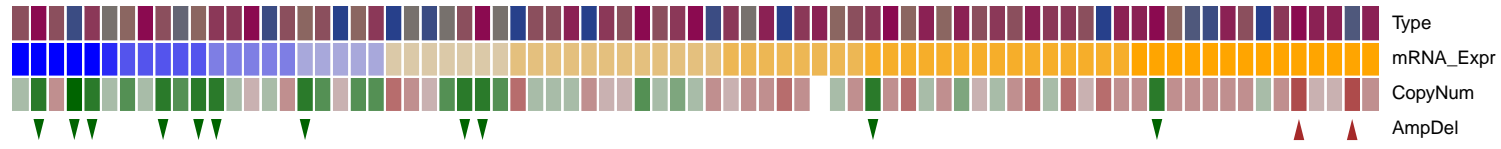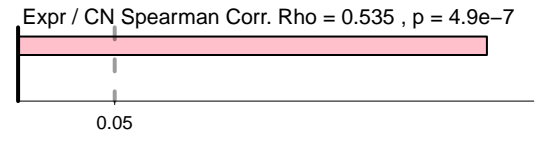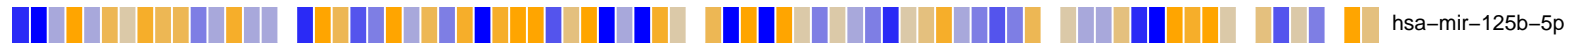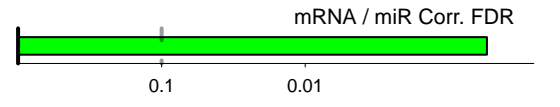

- 15 : 48470973
- 15 : 48470794
- 15 : 48470754
- 15 : 48470678
- 15 : 48470612
- 15 : 48470606
- 15 : 48470516
- 15 : 48470321
- 15 : 48470256
- 15 : 48470205
- 15 : 48469952
- 15 : 48442807
- 15 : 48442242

GeneLoc  
PromoterAssoc  
CpIsland

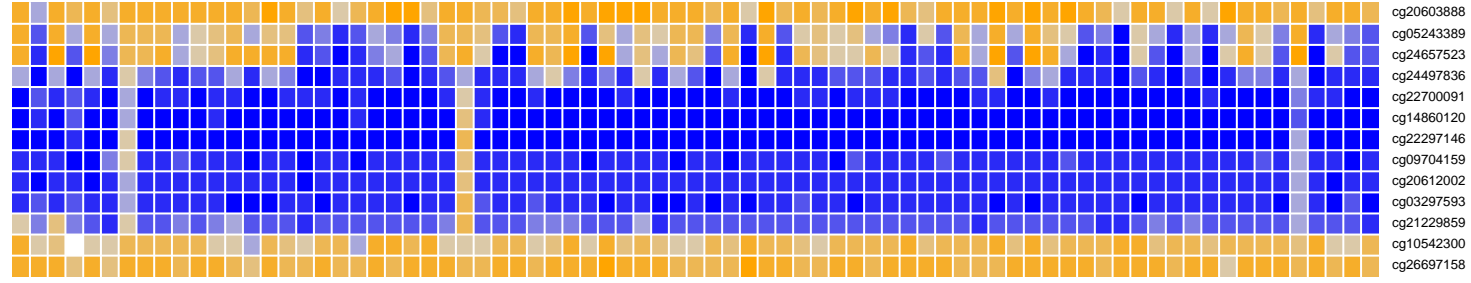

- cg20603888
- cg05243389
- cg24657523
- cg24497836
- cg22700091
- cg14860120
- cg22297146
- cg09704159
- cg20612002
- cg03297593
- cg21229859
- cg10542300
- cg26697158

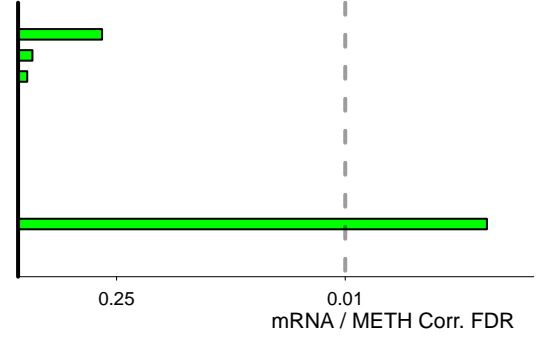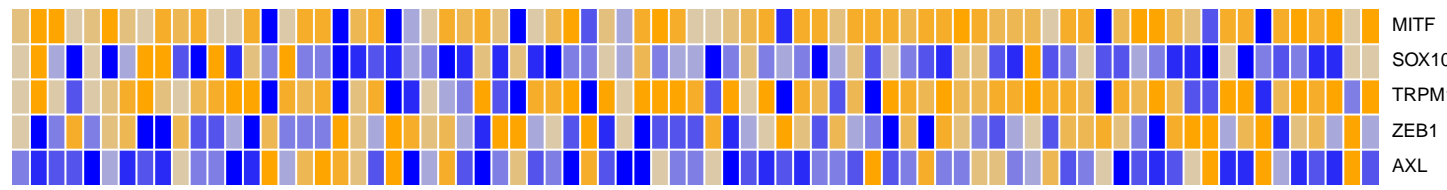

- MITF
- SOX10
- TRPM1
- ZEB1
- AXL

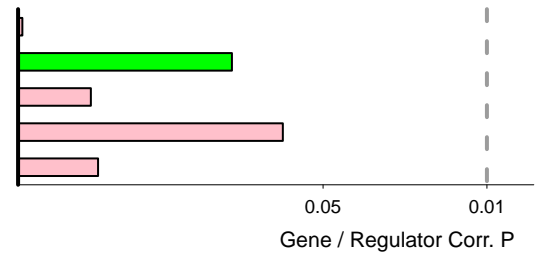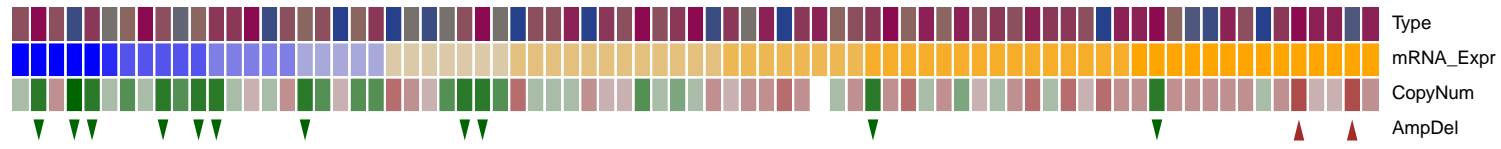

- TCGA-FS-A1ZU-06
- TCGA-GN-A8LL-06
- TCGA-YG-AA3P-06
- TCGA-WE-A8ZQ-06
- TCGA-D3-A8GP-06
- TCGA-FW-A313-06
- TCGA-EE-A3J7-06
- TCGA-DA-A1IA-06
- TCGA-EE-A17Z-06
- TCGA-EE-A2A5-06
- TCGA-FS-A1ZJ-06
- TCGA-FR-ARYD-06
- TCGA-W3-A821-06
- TCGA-GN-A4U7-06
- TCGA-EE-A2MM-06
- TCGA-D3-A6CI-06
- TCGA-D9-A8FC-06
- TCGA-D3-A4OL-06
- TCGA-FS-A1ZC-06
- TCGA-WE-A6JZ-06
- TCGA-FS-A1ZK-06
- TCGA-EE-A2OC-06
- TCGA-EE-A2UC-06
- TCGA-D3-A3MO-06
- TCGA-DA-A9SZ-06
- TCGA-GN-ABLK-06
- TCGA-D3-A3C6-06
- TCGA-D3-A1Q5-06
- TCGA-DA-A95W-06
- TCGA-W3-A824-06
- TCGA-ER-A3ES-06
- TCGA-LH-A9QB-06
- TCGA-EE-A29B-06
- TCGA-D3-A8GV-06
- TCGA-EE-A29L-06
- TCGA-RP-A690-06
- TCGA-RP-A695-06
- TCGA-D3-A8GK-06
- TCGA-EE-A3J8-06
- TCGA-FS-A4F0-06
- TCGA-EE-A3AH-06
- TCGA-GN-A268-06
- TCGA-ER-A42K-06
- TCGA-D3-A5GL-06
- TCGA-FS-A4F5-06
- TCGA-D9-A1X3-06
- TCGA-D3-A3ML-06
- TCGA-EE-A185-06
- TCGA-FS-A1Z3-06
- TCGA-EE-A29E-06
- TCGA-FS-A1ZW-06
- TCGA-EE-A180-06
- TCGA-ER-A19F-06
- TCGA-D3-A1QA-06
- TCGA-FR-A7U8-06
- TCGA-FS-A1ZY-06
- TCGA-3N-A9WB-06
- TCGA-EE-A29D-06
- TCGA-FS-A1ZE-06
- TCGA-EE-A20H-06
- TCGA-GN-A262-06
- TCGA-EE-A2GR-06
- TCGA-FS-A1ZG-06
- TCGA-FS-A4FB-06
- TCGA-ER-A19L-06
- TCGA-WE-A8K6-06
- TCGA-EE-A3AD-06
- TCGA-FS-A4F9-06
- TCGA-EE-A29A-06
- TCGA-EE-A3JI-06
- TCGA-D3-A8GL-06
- TCGA-FS-A1ZZ-06
- TCGA-D9-A6EG-06
- TCGA-WE-A8ZM-06
- TCGA-D9-A4Z6-06

# CYP27A1

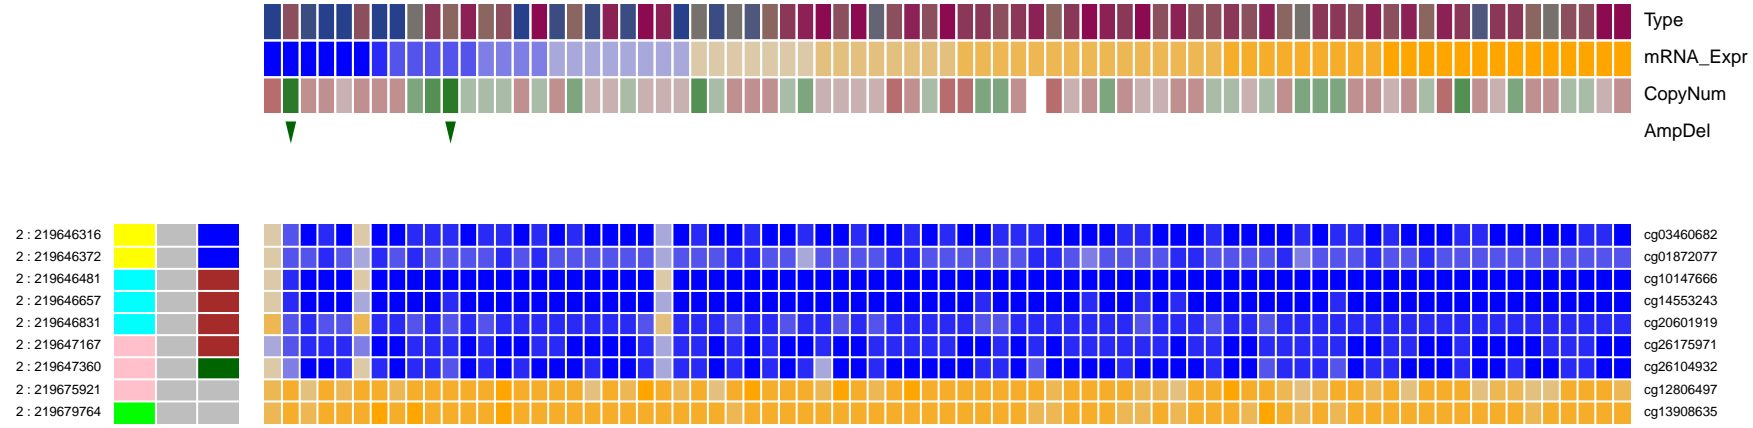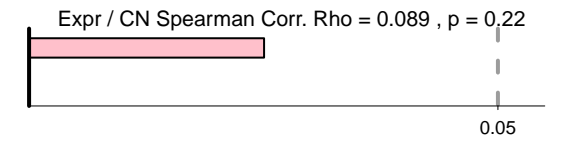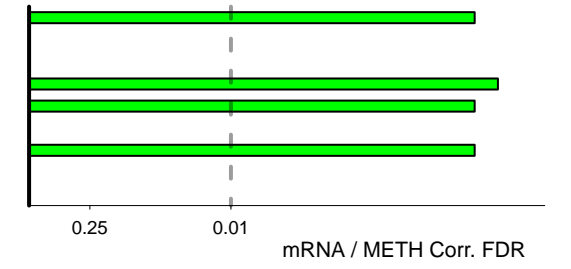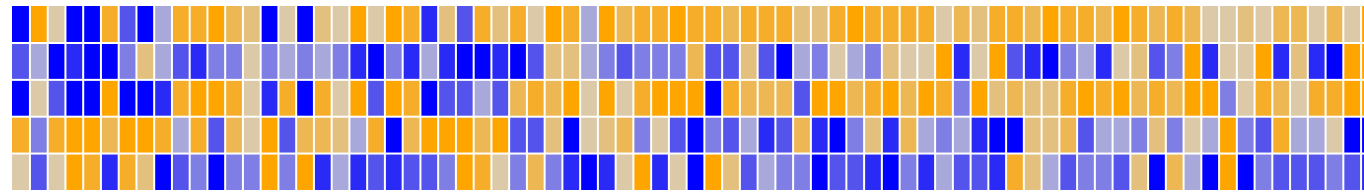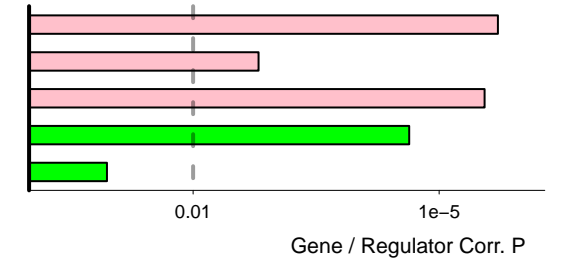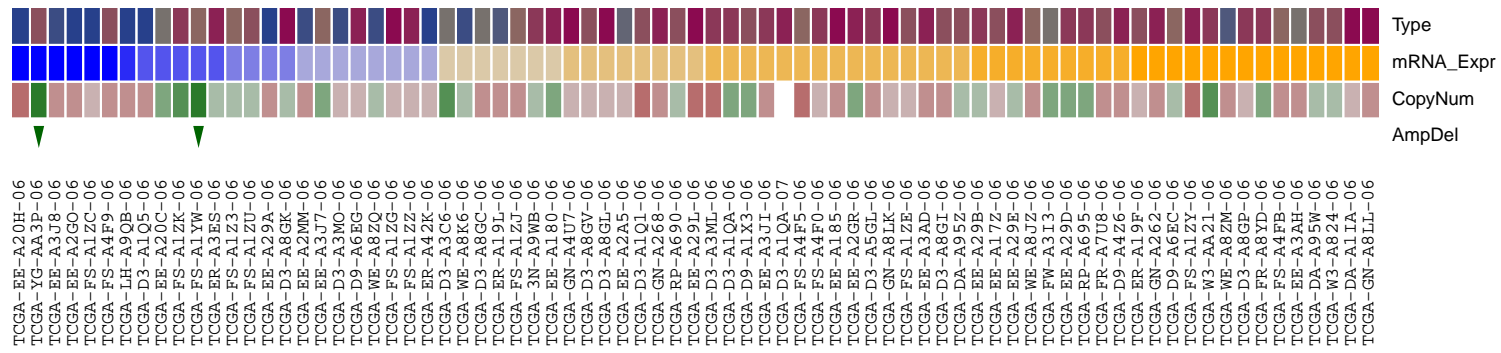

# SLC7A5

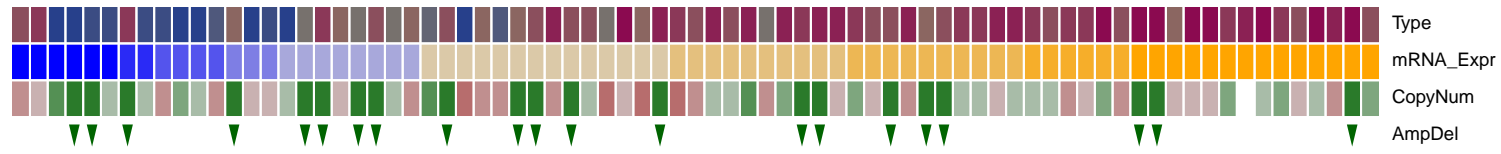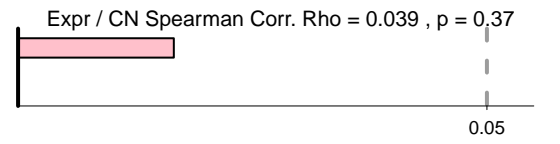

16 : 87904580  
 16 : 87903671  
 16 : 87903292  
 16 : 87903283  
 16 : 87902836  
 16 : 87902677  
 16 : 87902420  
 16 : 87899784  
 16 : 87898191  
 16 : 87894565  
 16 : 87894491  
 16 : 87894334  
 16 : 87890567  
 16 : 87887504  
 16 : 87887443  
 16 : 87887331  
 16 : 87886933  
 16 : 87886902  
 16 : 87886871  
 16 : 87885387  
 16 : 87885208  
 16 : 87879698  
 16 : 87879581  
 16 : 87879502  
 16 : 87878292  
 16 : 87877848  
 16 : 87874392  
 16 : 87874279  
 16 : 87874206  
 16 : 87873837  
 16 : 87873610  
 16 : 87873389  
 16 : 87871219  
 16 : 87871160  
 16 : 87869786  
 16 : 87869757  
 16 : 87868065  
 16 : 87868008  
 16 : 87866833  
 16 : 87866800  
 16 : 87865062  
 16 : 87864940  
 16 : 87864826  
 16 : 87864591  
 16 : 87864431  
 16 : 87863856  
 16 : 87863812  
 16 : 87863785

GeneLoc  
 PromoterAssoc  
 CpIsland

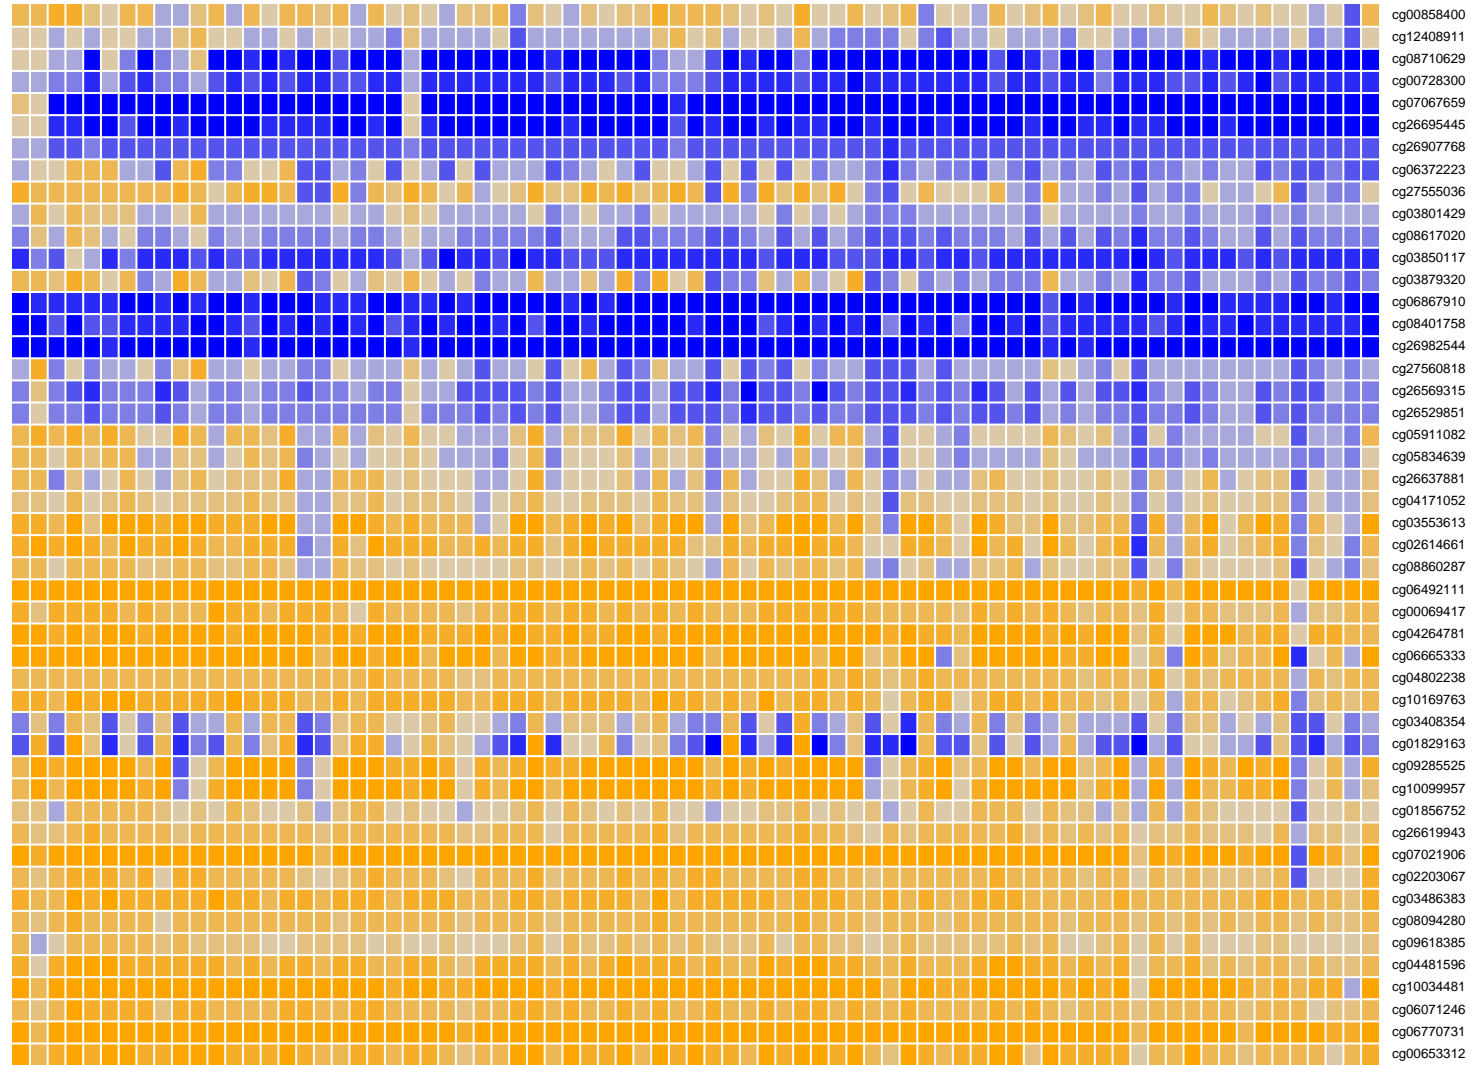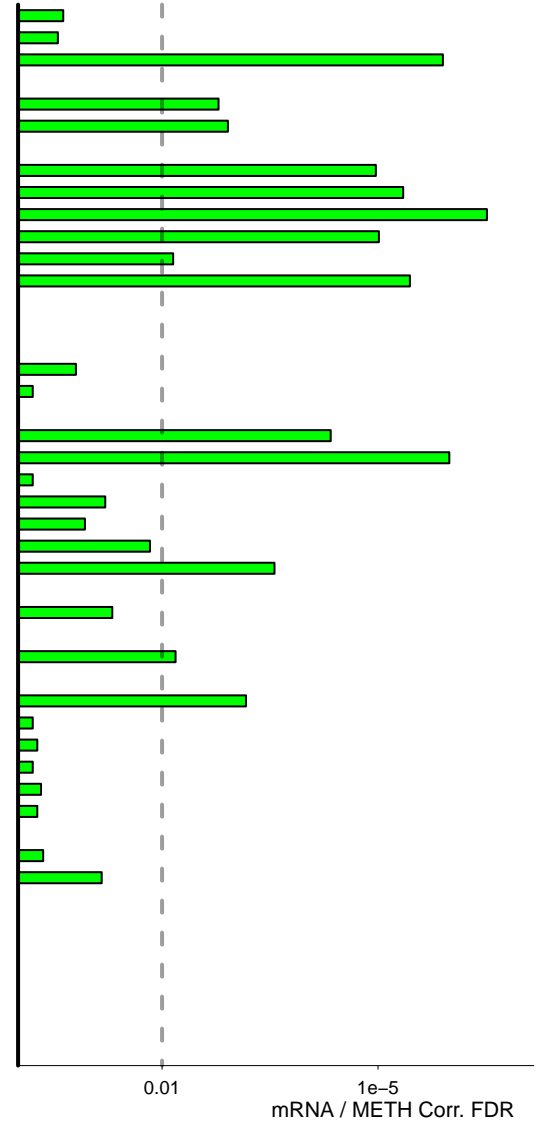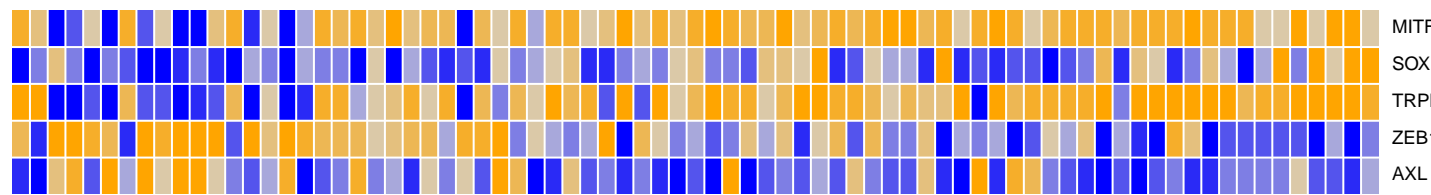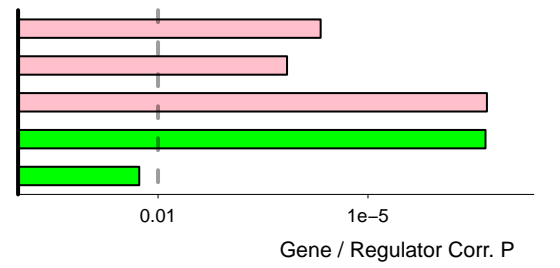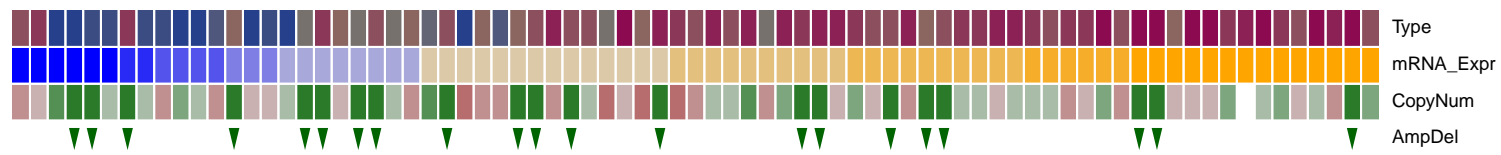

TCGA-FS-A4F9-06  
 TCGA-FS-A4F0-06  
 TCGA-D3-A1Q5-06  
 TCGA-LH-A9QB-06  
 TCGA-WE-A8ZQ-06  
 TCGA-EE-A2MM-06  
 TCGA-EE-A3JI-06  
 TCGA-WE-A8K6-06  
 TCGA-EE-A3J8-06  
 TCGA-EE-A2GO-06  
 TCGA-EE-A29A-06  
 TCGA-ER-A19L-06  
 TCGA-FS-A1ZJ-06  
 TCGA-ER-A4ZK-06  
 TCGA-D3-A3MO-06  
 TCGA-FS-A1ZC-06  
 TCGA-EE-A2QC-06  
 TCGA-EE-A29D-06  
 TCGA-FS-A1Z3-06  
 TCGA-D3-A6GC-06  
 TCGA-FS-A1ZU-06  
 TCGA-FW-A3J3-06  
 TCGA-EE-A3J7-06  
 TCGA-EE-AZAS-06  
 TCGA-FR-A7U8-06  
 TCGA-EE-A4FB-06  
 TCGA-FS-A4FB-06  
 TCGA-WE-A8ZM-06  
 TCGA-D9-A6EC-06  
 TCGA-EE-A3AD-06  
 TCGA-ER-A19F-06  
 TCGA-DA-A95W-06  
 TCGA-D3-A3C6-06  
 TCGA-FS-A1ZG-06  
 TCGA-FS-A4F5-06  
 TCGA-GN-A268-06  
 TCGA-D3-A8GP-06  
 TCGA-D9-A1X3-06  
 TCGA-ER-A3ES-06  
 TCGA-D3-A1O1-06  
 TCGA-GN-A262-06  
 TCGA-ER-A3AH-06  
 TCGA-EE-A180-06  
 TCGA-EE-A29B-06  
 TCGA-FS-A1ZY-06  
 TCGA-FS-A1ZZ-06  
 TCGA-D3-A1QA-06  
 TCGA-FS-A1ZE-06  
 TCGA-YG-A3ZP-06  
 TCGA-EE-A2GR-06  
 TCGA-WE-A6JZ-06  
 TCGA-EE-A172-06  
 TCGA-W3-AAZ1-06  
 TCGA-D3-A3ML-06  
 TCGA-D9-A6EG-06  
 TCGA-EE-A29E-06  
 TCGA-3N-A9WB-06  
 TCGA-W3-A8Z4-06  
 TCGA-FS-A1ZK-06  
 TCGA-EE-A29L-06  
 TCGA-EE-A29L-06  
 TCGA-DA-A95Z-06  
 TCGA-GN-A8LK-06  
 TCGA-EE-A185-06  
 TCGA-FS-A1YW-06  
 TCGA-D3-A8GL-06  
 TCGA-GN-A4U7-06  
 TCGA-RP-A695-06  
 TCGA-D3-A1QA-07  
 TCGA-FR-A8YD-06  
 TCGA-D3-A8GK-06  
 TCGA-FR-A8YD-06  
 TCGA-RP-A690-06  
 TCGA-DA-A1IA-06  
 TCGA-D9-A4Z6-06  
 TCGA-GN-A8LL-06  
 TCGA-D3-A8GI-06

# PLXNC1

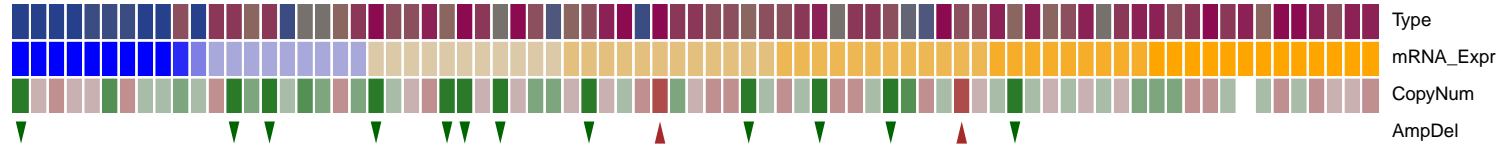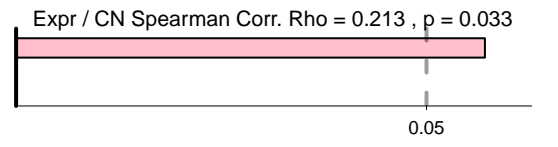

12:94541943  
12:94541990  
12:94542156  
12:94542977  
12:94543449  
12:94543560  
12:94543680  
12:94543764  
12:94543947  
12:94543978  
12:94544425  
12:94559051  
12:94565092  
12:94580329  
12:94580426  
12:94580657  
12:94580931  
12:94619636  
12:94624709  
12:94648646  
12:94658631  
12:94658675  
12:94676545  
12:94676688  
12:94681045  
12:94683151  
12:94689752  
12:94699141

GeneLoc  
PromoterAssoc  
CpGIsland

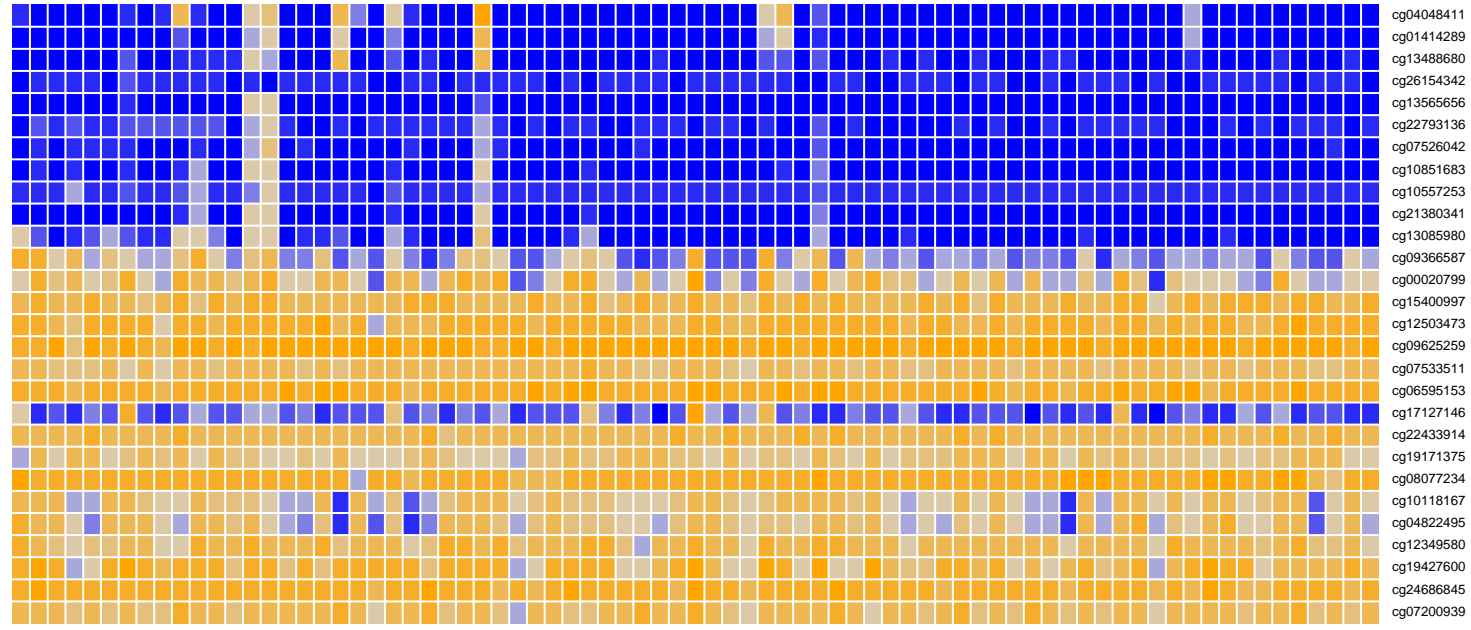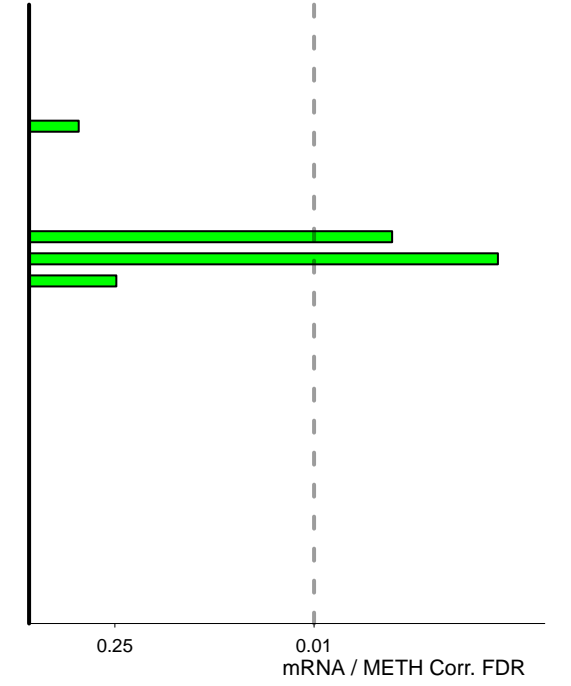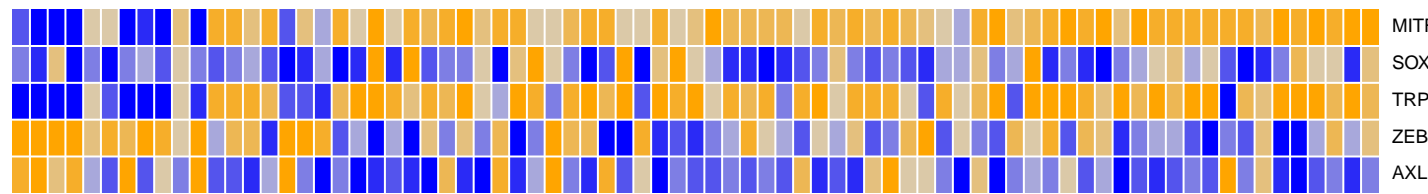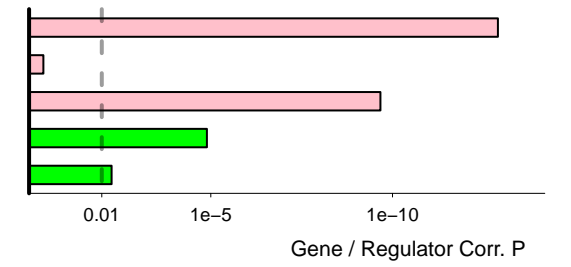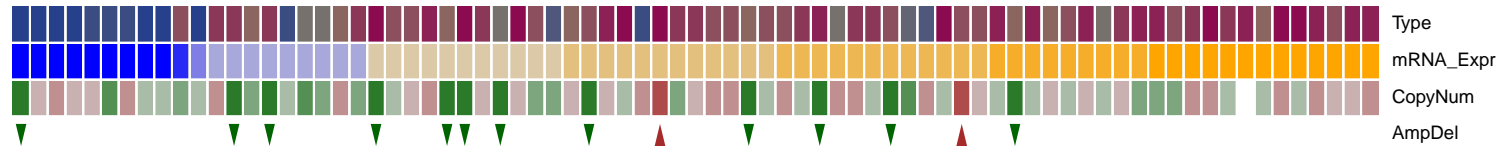

TCGA-LH-A9QB-06  
TCGA-EE-A2GO-06  
TCGA-D3-A1Q5-06  
TCGA-FS-A1ZC-06  
TCGA-D3-A3MO-06  
TCGA-WE-A8ZQ-06  
TCGA-EE-A2MM-06  
TCGA-ER-A42K-06  
TCGA-FS-A20H-06  
TCGA-FS-A1ZU-06  
TCGA-EE-A29A-06  
TCGA-FS-A1ZK-06  
TCGA-EE-A29D-06  
TCGA-EE-A3J7-06  
TCGA-EE-A3JI-06  
TCGA-WE-A8K6-06  
TCGA-DE-A3C6-06  
TCGA-EE-A20C-06  
TCGA-FS-A1ZJ-06  
TCGA-W3-AAZ1-06  
TCGA-GN-A6LL-06  
TCGA-DA-A35W-06  
TCGA-EE-A17Z-06  
TCGA-GN-A262-06  
TCGA-D9-A6EC-06  
TCGA-D3-A8GL-06  
TCGA-D3-A8GP-06  
TCGA-D3-A8GC-06  
TCGA-GN-A4U7-06  
TCGA-D3-A8GI-06  
TCGA-WE-A8ZM-06  
TCGA-FS-A1Z3-06  
TCGA-FS-A4F9-06  
TCGA-EE-A29E-06  
TCGA-DA-A1IA-06  
TCGA-EE-A3J8-06  
TCGA-GN-A8LK-06  
TCGA-FR-A8YD-06  
TCGA-EE-A29B-06  
TCGA-YG-AA3P-06  
TCGA-FR-A7U8-06  
TCGA-W3-A824-06  
TCGA-FS-A4FB-06  
TCGA-DA-A95Z-06  
TCGA-3N-A9WB-06  
TCGA-GN-A268-06  
TCGA-EE-A3AH-06  
TCGA-D3-AEGL-06  
TCGA-D3-A1QA-06  
TCGA-DE-A1O1-06  
TCGA-EE-A2X5-06  
TCGA-ER-A19L-06  
TCGA-D3-A6GK-06  
TCGA-D3-A6GV-06  
TCGA-ER-A19F-06  
TCGA-ER-A3ES-06  
TCGA-FS-A4F5-06  
TCGA-FS-A1ZY-06  
TCGA-FS-A1YW-06  
TCGA-RP-A690-06  
TCGA-FS-A1ZZ-06  
TCGA-FW-A3I3-06  
TCGA-FS-A4F0-06  
TCGA-EE-A2GR-06  
TCGA-EE-A3AD-06  
TCGA-D9-A1X3-06  
TCGA-RP-A695-06  
TCGA-EE-A185-06  
TCGA-D3-A3ML-06  
TCGA-D3-A1QA-07  
TCGA-FS-A1ZG-06  
TCGA-FS-A1ZG-06  
TCGA-EE-A29L-06  
TCGA-D9-A4Z6-06  
TCGA-FS-A1ZE-06  
TCGA-D9-A6EG-06  
TCGA-EE-A180-06

# BCL2A1

15 : 80264770  
 15 : 80264706  
 15 : 80264696  
 15 : 80263132  
 15 : 80260753

GeneLoc  
 PromoterAssoc  
 CpGIsland

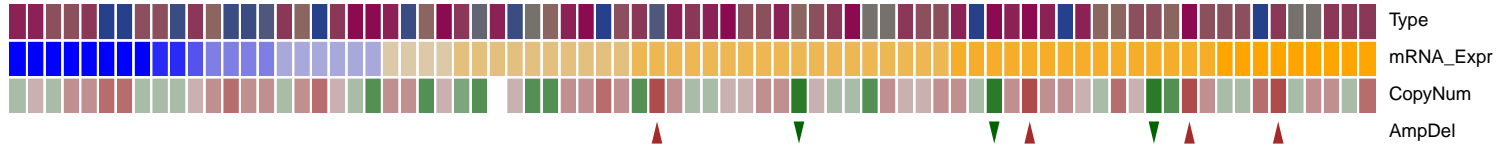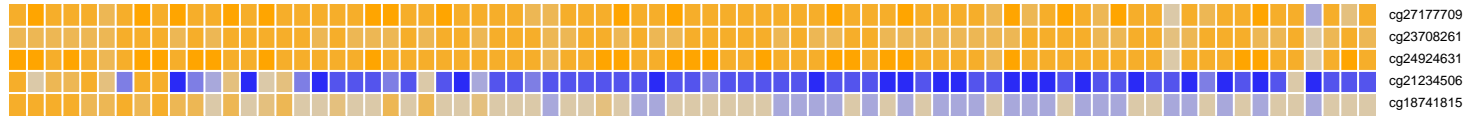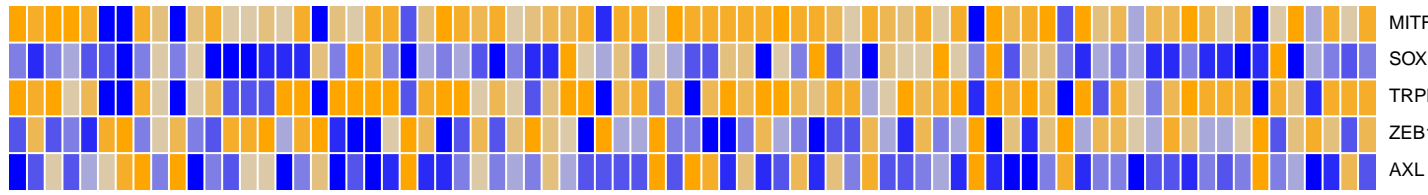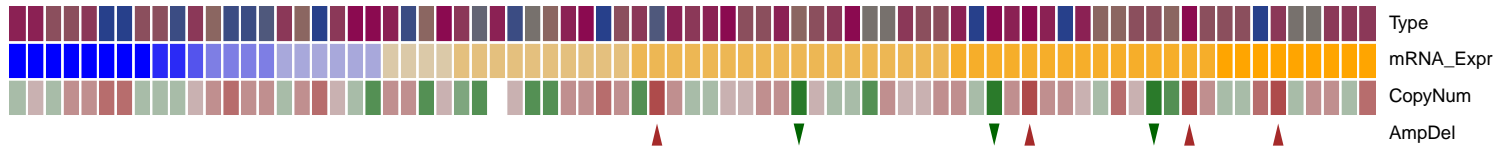

TCGA-ER-A3J5-06  
 TCGA-FS-A1Z8-06  
 TCGA-RP-A690-06  
 TCGA-YG-AA3P-06  
 TCGA-EE-A3J1-06  
 TCGA-EE-A20H-06  
 TCGA-FS-A1ZC-06  
 TCGA-D3-A1O1-06  
 TCGA-FS-A1ZU-06  
 TCGA-EE-A2MM-06  
 TCGA-D3-A8GP-06  
 TCGA-FS-A1ZJ-06  
 TCGA-WE-A8Z0-06  
 TCGA-EE-A3T8-06  
 TCGA-W3-AA21-06  
 TCGA-FS-A1YV-06  
 TCGA-D3-A1Q5-06  
 TCGA-FS-A4F0-06  
 TCGA-DA-A1IA-06  
 TCGA-EE-A29L-06  
 TCGA-GN-A268-06  
 TCGA-WE-A8K6-06  
 TCGA-EE-A3J7-06  
 TCGA-FS-A1ZG-06  
 TCGA-RP-A695-06  
 TCGA-EE-A2A5-06  
 TCGA-D3-A1QA-07  
 TCGA-D3-A3M0-06  
 TCGA-D3-A3C6-06  
 TCGA-WE-A8JZ-06  
 TCGA-FS-A1ZY-06  
 TCGA-EE-A185-06  
 TCGA-ER-A42K-06  
 TCGA-D9-A1X3-06  
 TCGA-FS-A1ZK-06  
 TCGA-WE-A8ZM-06  
 TCGA-EE-A2GR-06  
 TCGA-D3-A3ML-06  
 TCGA-EE-A29E-06  
 TCGA-GN-A4U7-06  
 TCGA-ER-A19F-06  
 TCGA-FS-A4F9-06  
 TCGA-D9-A4Z6-06  
 TCGA-D9-A6EC-06  
 TCGA-EE-A17Z-06  
 TCGA-D3-A1QA-06  
 TCGA-D3-A8CK-06  
 TCGA-EE-A2AH-06  
 TCGA-EE-A29B-06  
 TCGA-FS-A1ZE-06  
 TCGA-D3-A6G1-06  
 TCGA-EE-A3AD-06  
 TCGA-EE-A29A-06  
 TCGA-GN-A6LL-06  
 TCGA-GN-A262-06  
 TCGA-GN-A6LK-06  
 TCGA-EE-A180-06  
 TCGA-LH-A9QB-06  
 TCGA-D9-A6EG-06  
 TCGA-FS-A4F5-06  
 TCGA-FS-A1Z3-06  
 TCGA-D3-A8GV-06  
 TCGA-DA-A95Z-06  
 TCGA-FS-A4FB-06  
 TCGA-D3-A8GL-06  
 TCGA-FR-A7U8-06  
 TCGA-DA-A95W-06  
 TCGA-W3-A824-06  
 TCGA-EE-A2G0-06  
 TCGA-FR-A8YD-06  
 TCGA-FW-A313-06  
 TCGA-EE-A20C-06  
 TCGA-D3-A5GL-06  
 TCGA-3N-A9WB-06  
 TCGA-EE-A29D-06

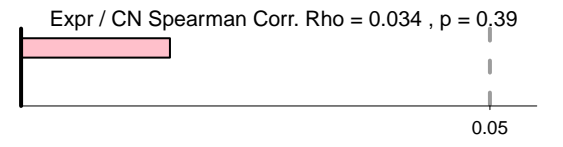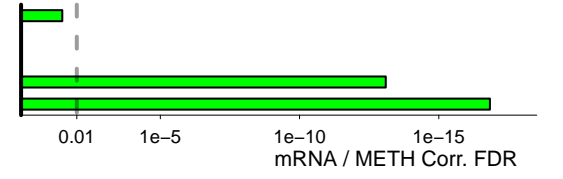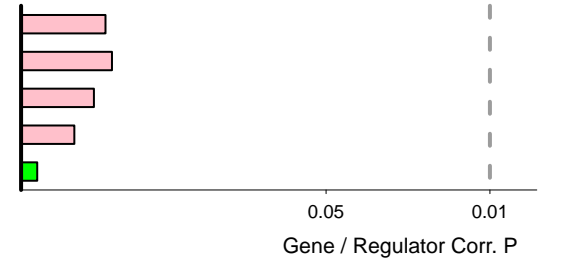

# SNCA

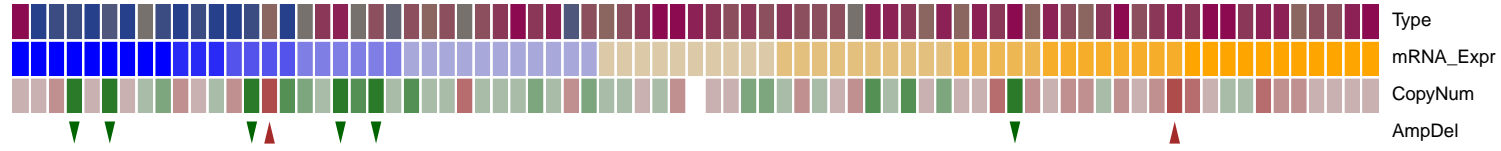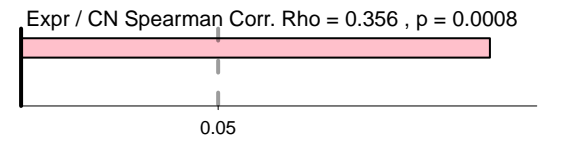

4 : 90759203  
4 : 90759115  
4 : 90759057  
4 : 90758843  
4 : 90758797  
4 : 90758777  
4 : 90758537  
4 : 90758529  
4 : 90758494  
4 : 90758469  
4 : 90758406  
4 : 90758216  
4 : 90758120  
4 : 90757814  
4 : 90757629  
4 : 90757533  
4 : 90757452  
4 : 90757398  
4 : 90757378  
4 : 90757351  
4 : 90757139  
4 : 90756533  
4 : 90675036  
4 : 90647041

GeneLoc  
PromoterAssoc  
CpGIsland

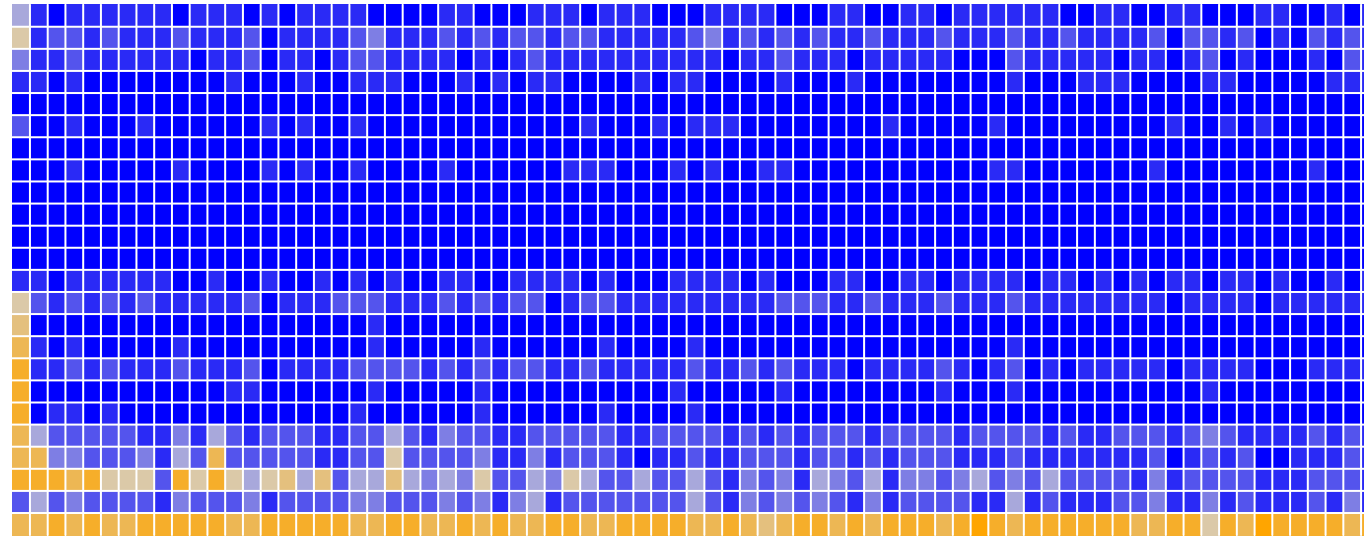

cg12030690  
cg05241924  
cg10731794  
cg15452573  
cg20776829  
cg23396644  
cg00119181  
cg01035160  
cg11512365  
cg10208370  
cg02192967  
cg08708229  
cg00193021  
cg18258770  
cg06848047  
cg26578617  
cg14346243  
cg20003494  
cg06632027  
cg15133208  
cg01966878  
cg11661187  
cg08030922  
cg01681236

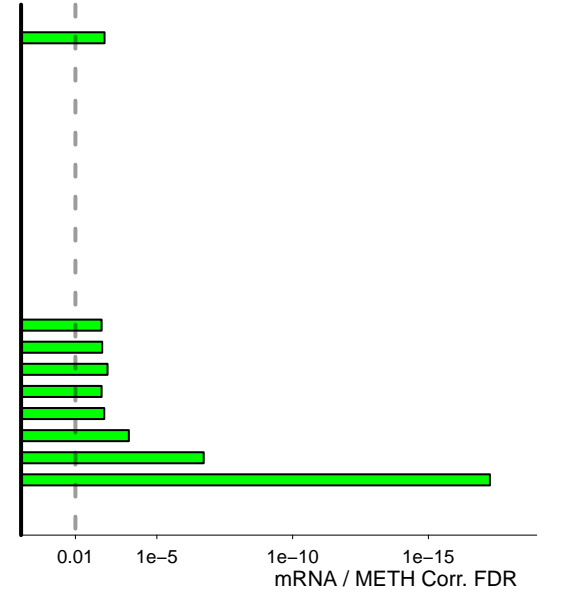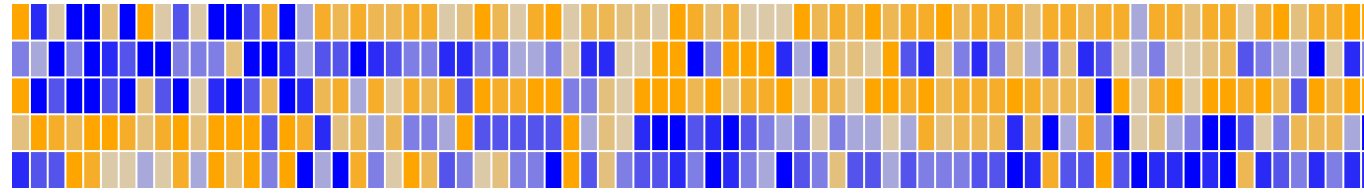

MITF  
SOX10  
TRPM1  
ZEB1  
AXL

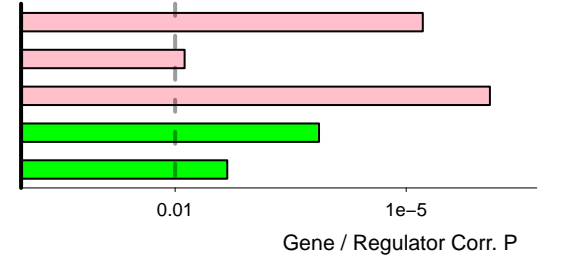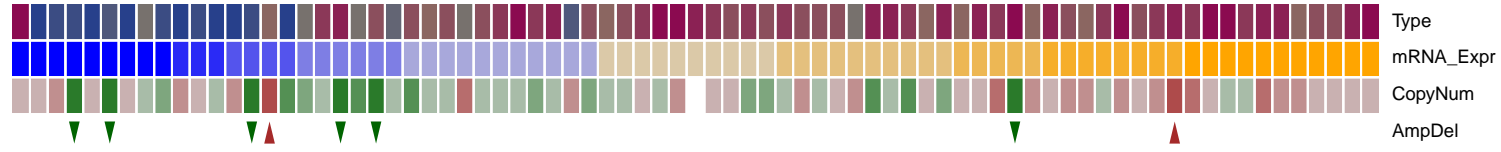

TCGA-D3-A8GL-06  
TCGA-ER-A42K-06  
TCGA-WE-A8ZQ-06  
TCGA-EE-A2MM-06  
TCGA-FS-A1ZC-06  
TCGA-ER-A19L-06  
TCGA-EE-A20H-06  
TCGA-FW-A313-06  
TCGA-EE-A3J8-06  
TCGA-LH-A9QB-06  
TCGA-D3-A3MO-06  
TCGA-EE-A29A-06  
TCGA-D3-A1O5-06  
TCGA-WE-A8K6-06  
TCGA-FS-A1ZT-06  
TCGA-EE-A2GO-06  
TCGA-EE-A3OC-06  
TCGA-EE-A3JL-06  
TCGA-GN-A8G2-06  
TCGA-D3-A8GC-06  
TCGA-FR-A708-06  
TCGA-EE-A2A5-06  
TCGA-D3-A1Q1-06  
TCGA-D9-A8EC-06  
TCGA-DA-A95W-06  
TCGA-D3-A3C6-06  
TCGA-RP-A690-06  
TCGA-D3-A1QA-06  
TCGA-D3-A8GK-06  
TCGA-RP-A695-06  
TCGA-ER-A3ES-06  
TCGA-WE-A8ZM-06  
TCGA-DA-A95Z-06  
TCGA-WE-A8JZ-06  
TCGA-FS-A1ZU-06  
TCGA-EE-A29B-06  
TCGA-DA-A1IA-06  
TCGA-GN-A8LL-06  
TCGA-D3-A1QA-07  
TCGA-FS-A4F0-06  
TCGA-EE-A17Z-06  
TCGA-FR-A8YD-06  
TCGA-D3-A8GI-06  
TCGA-W3-AA21-06  
TCGA-YG-AA3P-06  
TCGA-W3-A824-06  
TCGA-ER-A19F-06  
TCGA-EE-A3AH-06  
TCGA-D9-A4Z6-06  
TCGA-FS-A1ZY-06  
TCGA-FS-A1ZK-06  
TCGA-FS-A1YW-06  
TCGA-EE-A180-06  
TCGA-FS-A1Z3-06  
TCGA-FS-A1ZZ-06  
TCGA-EE-A29D-06  
TCGA-GN-A8LK-06  
TCGA-EE-A3U7-06  
TCGA-EE-A29E-06  
TCGA-D9-A1X3-06  
TCGA-FS-A4FB-06  
TCGA-D3-A3ML-06  
TCGA-EE-A185-06  
TCGA-D3-A8GV-06  
TCGA-D3-A5GL-06  
TCGA-EE-A3AD-06  
TCGA-D3-A8GP-06  
TCGA-GN-A4U7-06  
TCGA-EE-A29L-06  
TCGA-3N-A9WB-06  
TCGA-GN-A268-06  
TCGA-EE-A2GR-06  
TCGA-FS-A4F5-06  
TCGA-FS-A4F9-06  
TCGA-FS-A1ZE-06  
TCGA-D9-A6EG-06  
TCGA-FS-A1ZG-06



# BIRC7

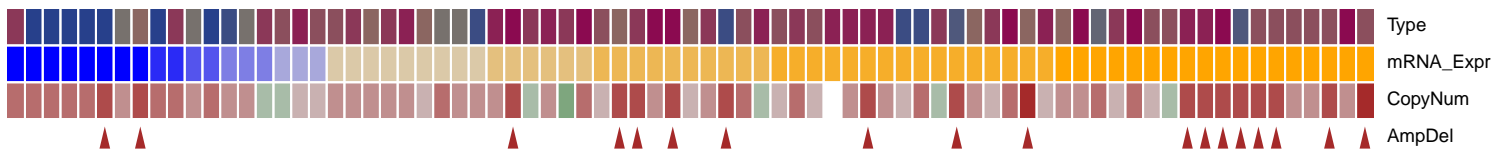

20:61866960  
20:61867137  
20:61867154  
20:61867178  
20:61867212  
20:61867218  
20:61867349  
20:61867533  
20:61870691  
20:61870861  
20:61871027  
20:61871067  
20:61871452

GeneLoc  
PromoterAssoc  
CpGIsland

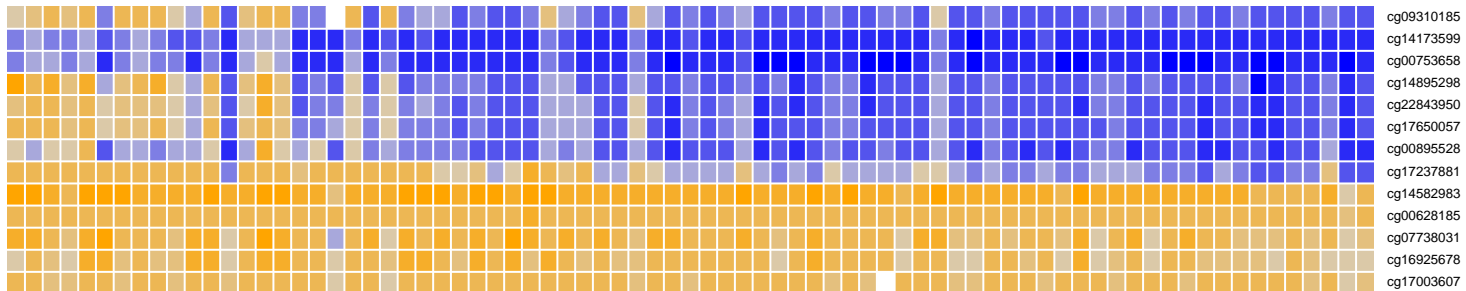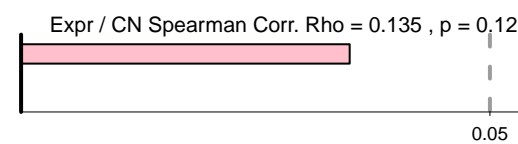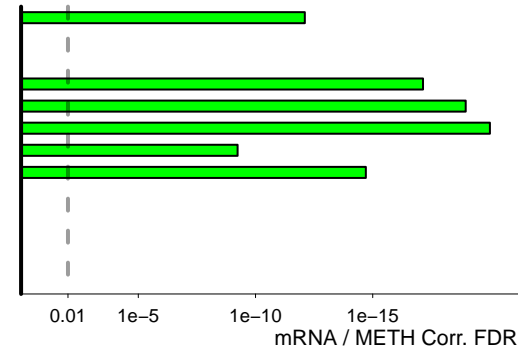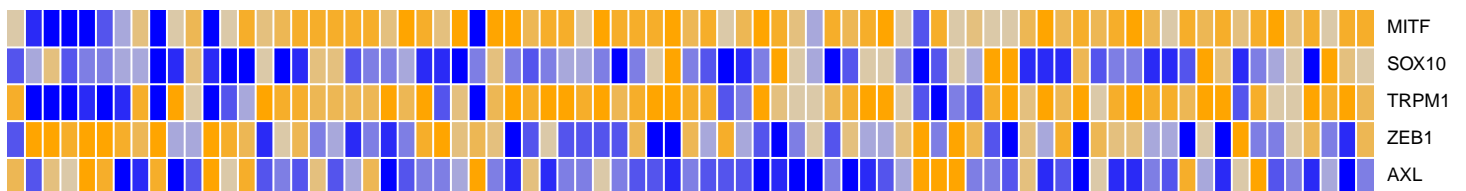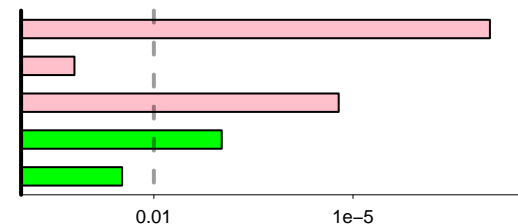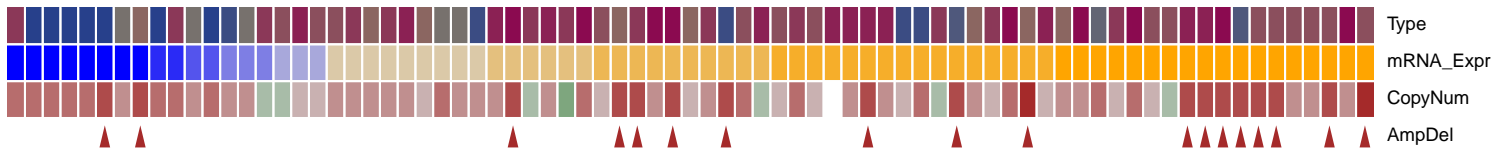

TCGA-3N-A9WB-06  
TCGA-ER-A42K-06  
TCGA-D3-A105-06  
TCGA-EE-A20H-06  
TCGA-EE-A29A-06  
TCGA-LH-A90B-06  
TCGA-EE-A20C-06  
TCGA-EE-A3J7-06  
TCGA-FS-A12C-06  
TCGA-W3-AA21-06  
TCGA-EE-A3AH-06  
TCGA-EE-A260-06  
TCGA-EE-A3J8-06  
TCGA-D3-A8GC-06  
TCGA-EE-A29B-06  
TCGA-W3-A824-06  
TCGA-FS-A17Z-06  
TCGA-ER-A19F-06  
TCGA-D9-A1X3-06  
TCGA-EE-A3JL-06  
TCGA-D9-A6EC-06  
TCGA-FS-A4F0-06  
TCGA-EE-A2GR-06  
TCGA-FS-A1YW-06  
TCGA-D3-A3C6-06  
TCGA-FW-A3T3-06  
TCGA-EE-A2MM-06  
TCGA-EE-A180-06  
TCGA-FS-A1ZG-06  
TCGA-D3-A1QA-06  
TCGA-GN-A268-06  
TCGA-RP-A695-06  
TCGA-D3-A89K-06  
TCGA-RP-A690-06  
TCGA-FS-A1ZU-06  
TCGA-EE-A29D-06  
TCGA-EE-A185-06  
TCGA-GN-A8LL-06  
TCGA-FS-A1Z3-06  
TCGA-FS-A1ZK-06  
TCGA-WE-A8ZQ-06  
TCGA-DA-A95Z-06  
TCGA-ER-A3FS-06  
TCGA-EE-A17Z-06  
TCGA-D3-A8GP-06  
TCGA-D3-A8GV-06  
TCGA-D3-A1QA-07  
TCGA-GN-A2K2-06  
TCGA-EE-A3ND-06  
TCGA-D9-A4Z6-06  
TCGA-D3-A3MO-06  
TCGA-WE-A8K6-06  
TCGA-D3-A3ML-06  
TCGA-WE-A8ZM-06  
TCGA-FS-A4FS-06  
TCGA-FR-A8JD-06  
TCGA-DA-A1JA-06  
TCGA-WE-A8JZ-06  
TCGA-D9-A6EG-06  
TCGA-FS-A4FB-06  
TCGA-EE-A29L-06  
TCGA-EE-A2A5-06  
TCGA-D3-A5GL-06  
TCGA-FR-A7U8-06  
TCGA-DA-A95W-06  
TCGA-EE-A29E-06  
TCGA-FS-A1ZY-06  
TCGA-ER-A4U7-06  
TCGA-D3-A1Q1-06  
TCGA-YG-AA3P-06  
TCGA-FS-A1ZU-06  
TCGA-FS-A4F9-06  
TCGA-D3-A8GI-06  
TCGA-GN-A8LK-06  
TCGA-FS-A1ZE-06

Gene / Regulator Corr. P

# MFSD12

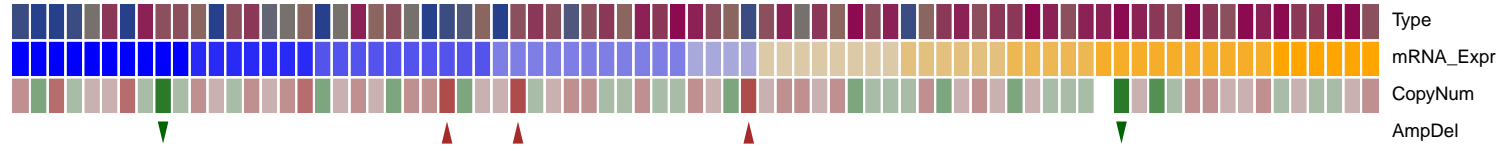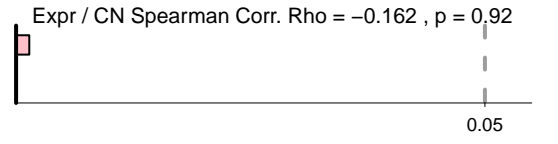

19: 3575538  
19: 3574625  
19: 3574300  
19: 3573840  
19: 3573832  
19: 3573751  
19: 3573543  
19: 3572957  
19: 3572873  
19: 3572869  
19: 3572718  
19: 3572546  
19: 3572516  
19: 3572410  
19: 3558417  
19: 3557873  
19: 3557856  
19: 3557666  
19: 3557664  
19: 3557658  
19: 3557538  
19: 3556997  
19: 3556970  
19: 3556718  
19: 3553032  
19: 3551022  
19: 3548977  
19: 3548338  
19: 3548073  
19: 3547948  
19: 3546364  
19: 3546160  
19: 3543846  
19: 3539158  
19: 3539097

GeneLoc  
PromoterAssoc  
CpGIsland

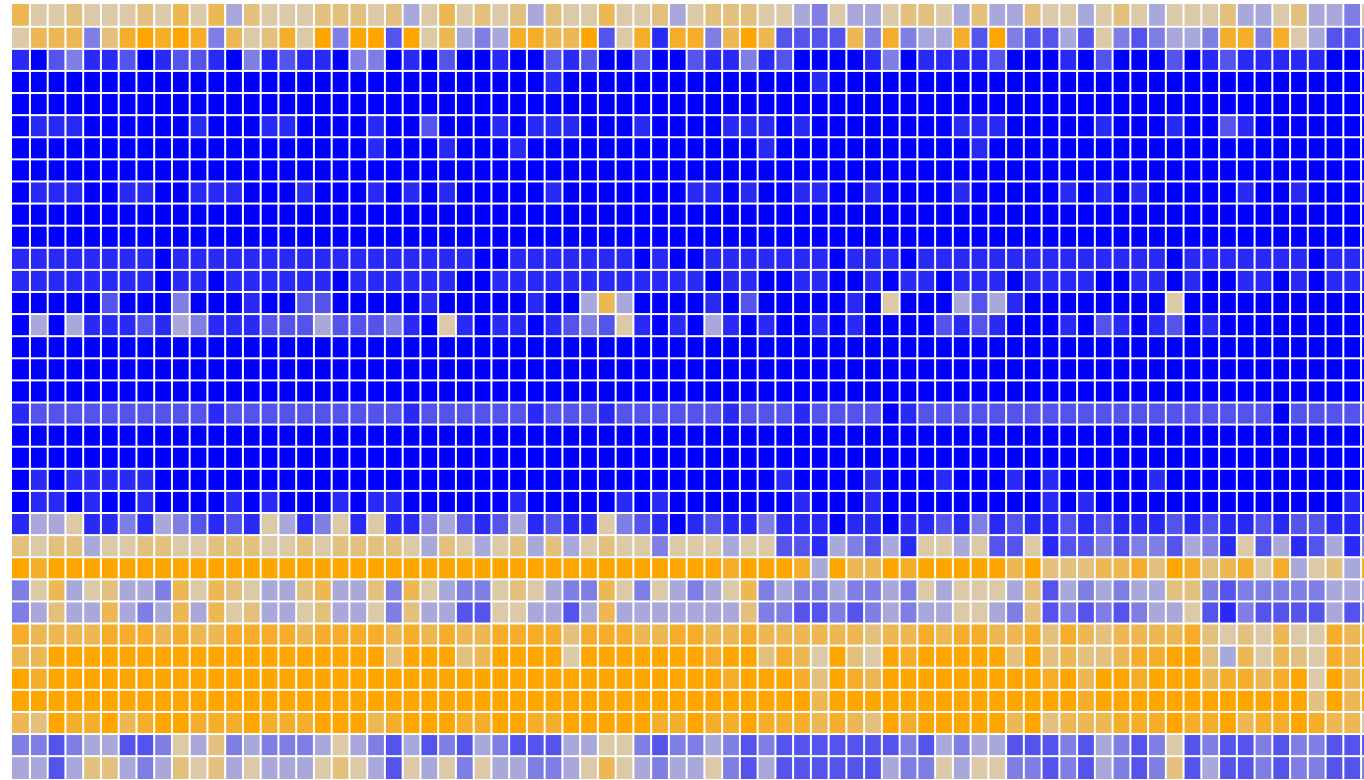

cg13437146  
cg09996240  
cg05261702  
cg08167722  
cg16584020  
cg12946225  
cg03603642  
cg20462845  
cg01433420  
cg24106257  
cg16257384  
cg20064569  
cg01335042  
cg13640791  
cg08035555  
cg00854006  
cg26002659  
cg04180125  
cg04677326  
cg15606180  
cg18458026  
cg11726363  
cg02043651  
cg14034476  
cg19584038  
cg26168358  
cg07564563  
cg03288653  
cg09444586  
cg15793850  
cg18415485  
cg05607388  
cg01589153  
cg00491548  
cg17427615

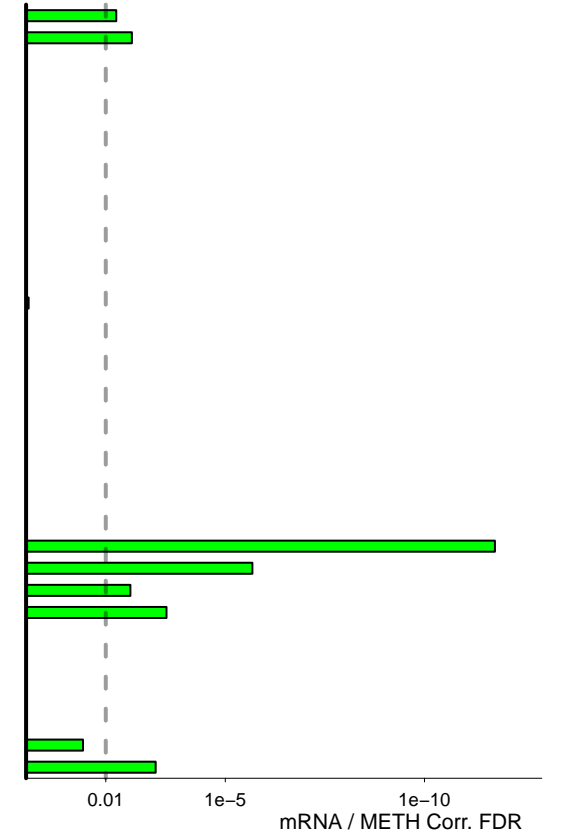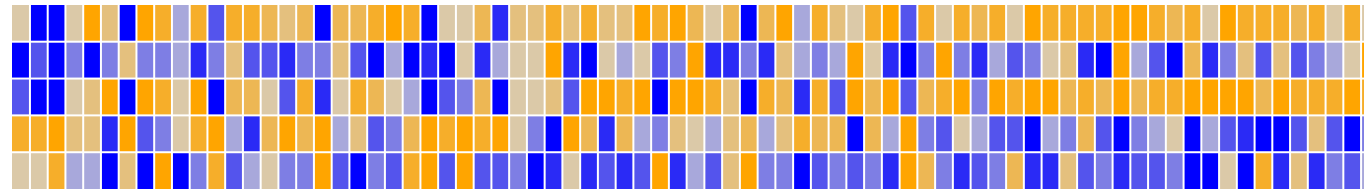

MITF  
SOX10  
TRPM1  
ZEB1  
AXL

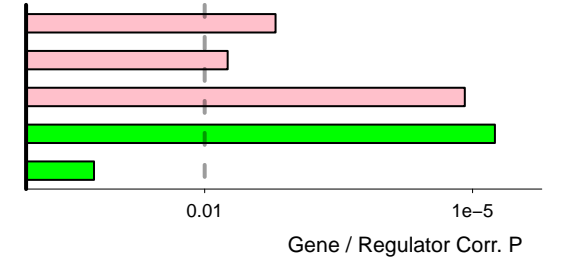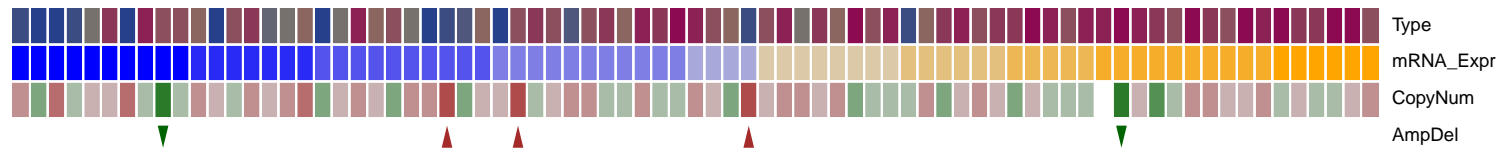

TCGA-EE-A3J8-06  
TCGA-EE-A20H-06  
TCGA-FS-A1ZC-06  
TCGA-D3-A3M0-06  
TCGA-FW-A3I3-06  
TCGA-FS-A4F0-06  
TCGA-D3-A1O5-06  
TCGA-ER-A3ES-06  
TCGA-D3-A1O1-06  
TCGA-D3-A8GV-06  
TCGA-FS-A1YW-06  
TCGA-LH-A9OB-06  
TCGA-D9-A1X3-06  
TCGA-ER-A3JI-06  
TCGA-ER-A2A5-06  
TCGA-D3-A3C6-06  
TCGA-FS-A1Z3-06  
TCGA-EE-A29A-06  
TCGA-EE-A3AH-06  
TCGA-GN-A262-06  
TCGA-FS-A1ZU-06  
TCGA-YG-AA3P-06  
TCGA-D3-A8GC-06  
TCGA-EE-A2GO-06  
TCGA-WE-A8ZQ-06  
TCGA-FS-A4FB-06  
TCGA-ER-A42K-06  
TCGA-FS-A1ZU-06  
TCGA-D3-A8GP-06  
TCGA-EE-A17Z-06  
TCGA-ER-A19L-06  
TCGA-FS-A4F9-06  
TCGA-EE-A29B-06  
TCGA-EE-A3J7-06  
TCGA-D9-A4Z6-06  
TCGA-D3-A3ML-06  
TCGA-D3-A8GL-06  
TCGA-FS-A1ZY-06  
TCGA-DA-A95W-06  
TCGA-WE-A8JZ-06  
TCGA-EE-A2MM-06  
TCGA-FR-A7U8-06  
TCGA-EE-A180-06  
TCGA-EE-A20C-06  
TCGA-ER-A29D-06  
TCGA-FS-A4F5-06  
TCGA-DA-A1IA-06  
TCGA-FS-A1ZE-06  
TCGA-D9-A5EG-06  
TCGA-WE-A8K6-06  
TCGA-D9-A6EC-06  
TCGA-FR-A6TD-06  
TCGA-GN-A268-06  
TCGA-DA-A95Z-06  
TCGA-RP-A695-06  
TCGA-3N-A9WB-06  
TCGA-FS-A1ZG-06  
TCGA-EE-A3AD-06  
TCGA-ER-A19F-06  
TCGA-FS-A1ZZ-06  
TCGA-D3-A1QA-07  
TCGA-GN-A8LL-06  
TCGA-EE-A2GR-06  
TCGA-FS-A1ZK-06  
TCGA-W3-A824-06  
TCGA-EE-A29L-06  
TCGA-W3-AA21-06  
TCGA-RP-A690-06  
TCGA-GN-A8LK-06  
TCGA-EE-A29E-06  
TCGA-GN-A4U7-06  
TCGA-D3-A1QA-06  
TCGA-D3-A5GL-06  
TCGA-D3-A8GK-06  
TCGA-EE-A185-06  
TCGA-D3-A8GI-06

# SGK1

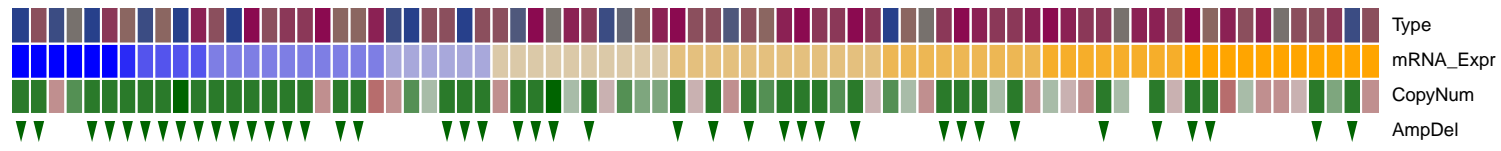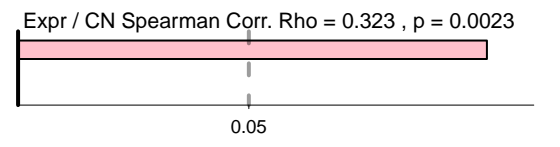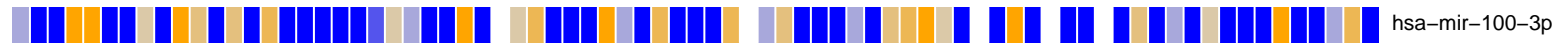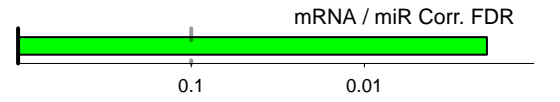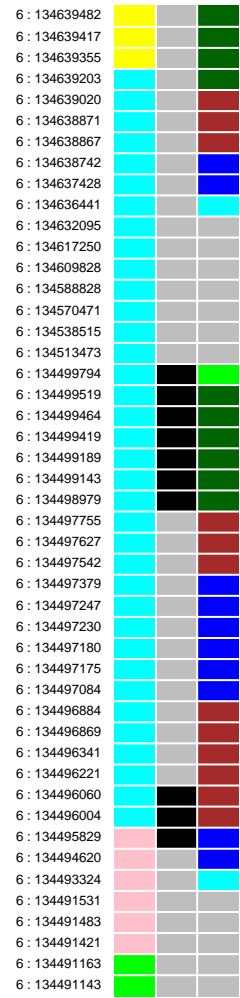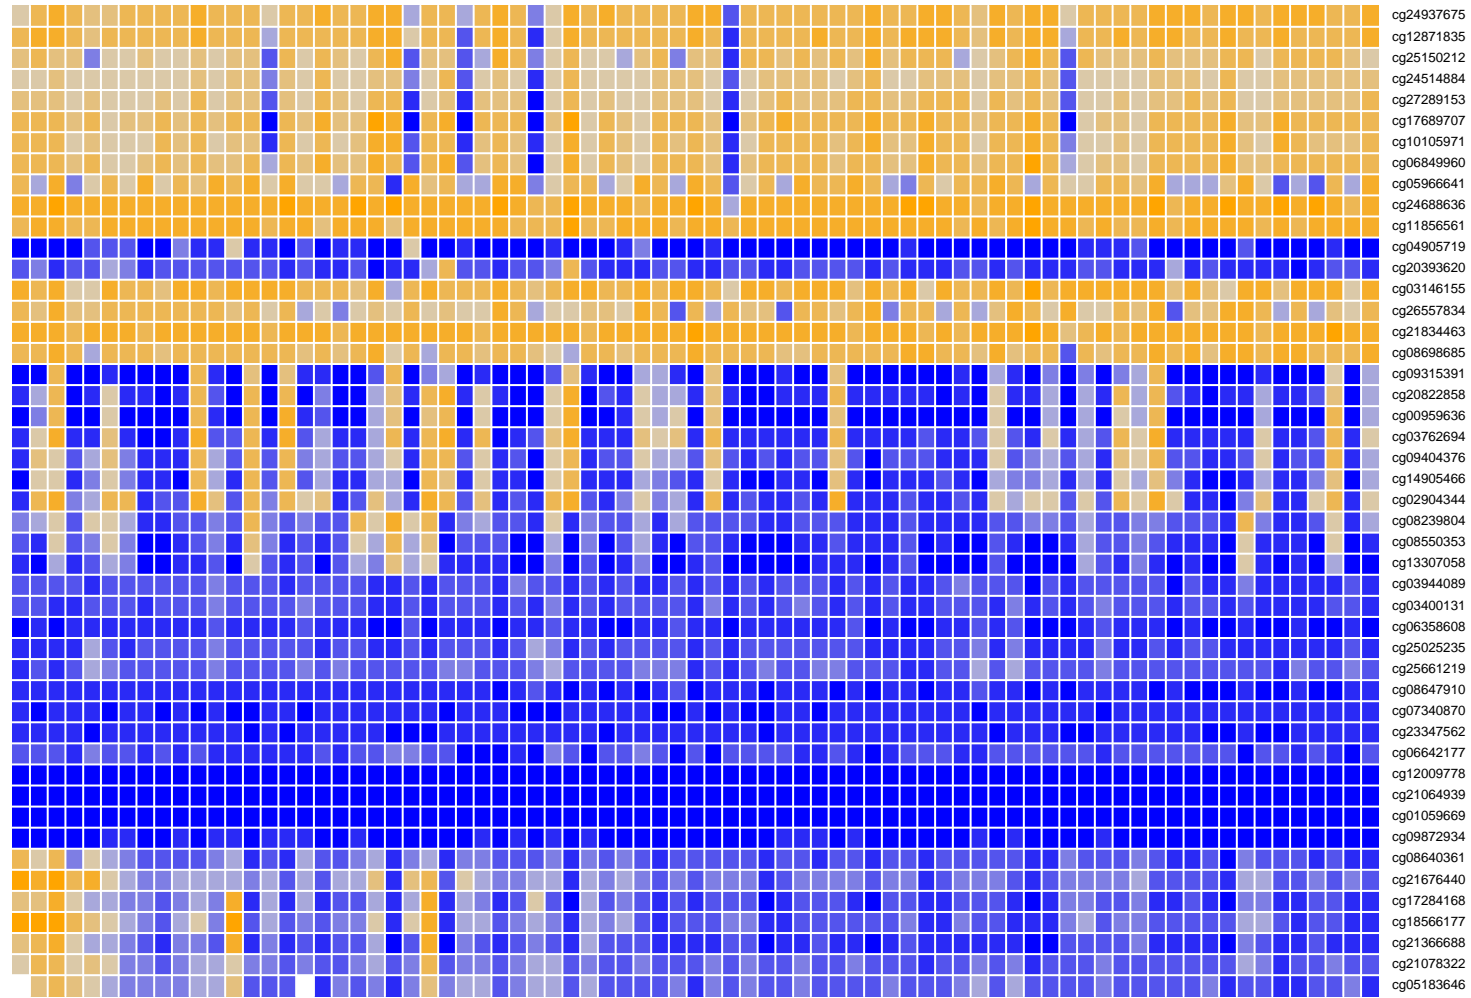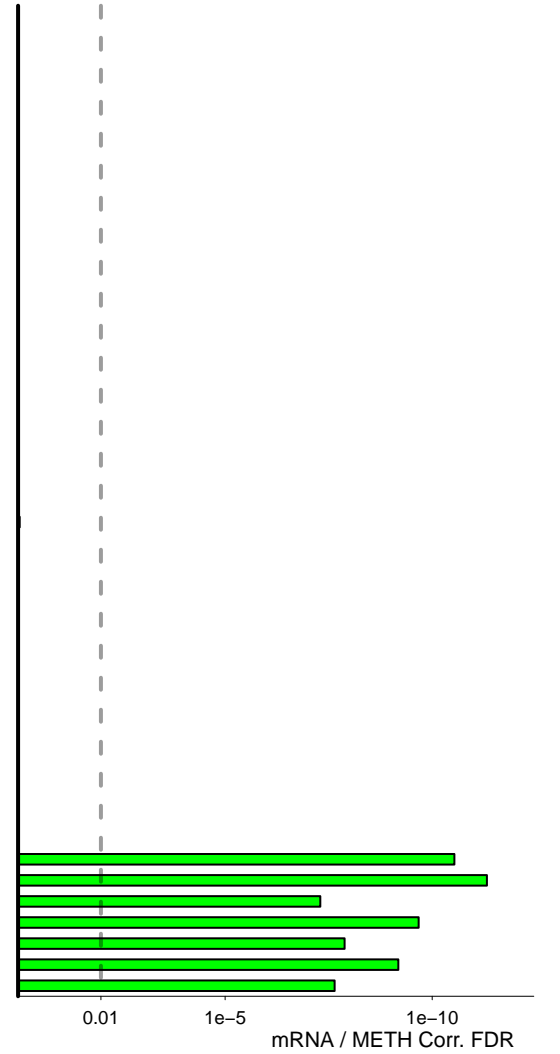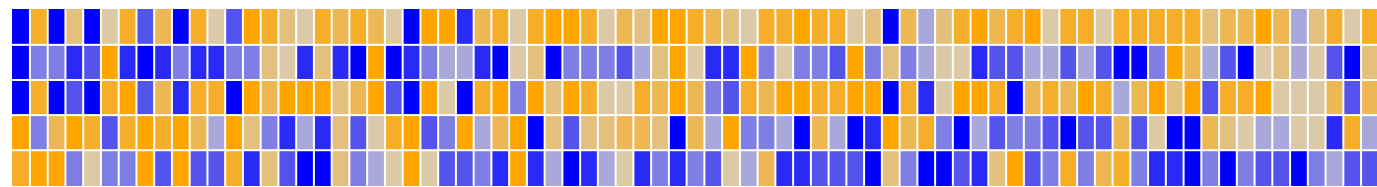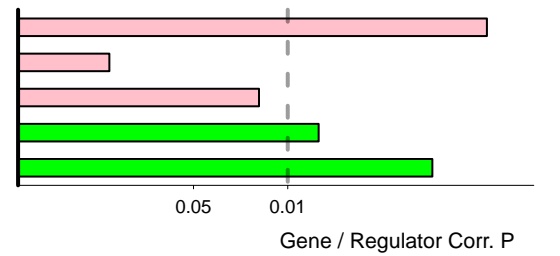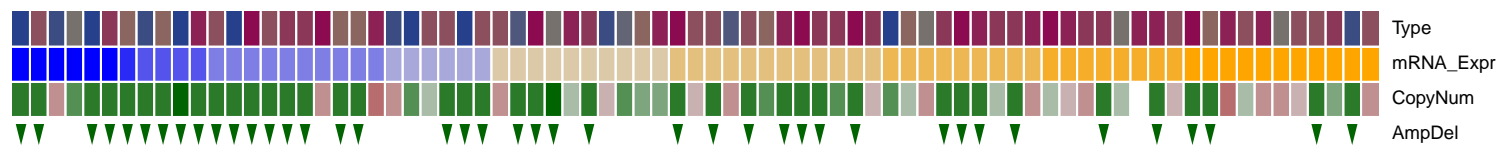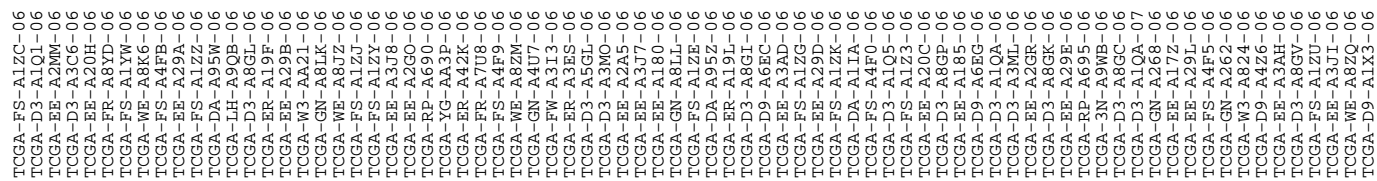

# SHTN1

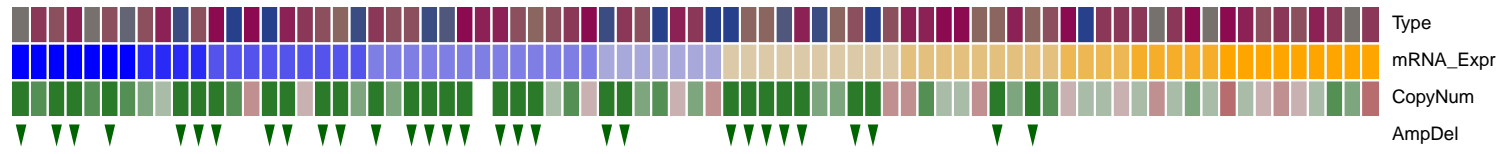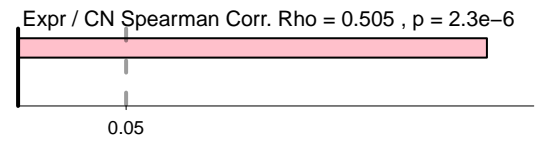

10 : 118886279  
 10 : 118885753  
 10 : 118885636  
 10 : 118882764  
 10 : 118855542  
 10 : 118765597  
 10 : 118765335  
 10 : 118765319  
 10 : 118765255  
 10 : 118765220  
 10 : 118765174  
 10 : 118765145  
 10 : 118765125  
 10 : 118765099  
 10 : 118764743  
 10 : 118764521  
 10 : 118764201  
 10 : 118735446  
 10 : 118734132  
 10 : 118654150  
 10 : 118652981  
 10 : 118652838  
 10 : 118646037

GeneLoc  
 PromoterAssoc  
 CpGIsland

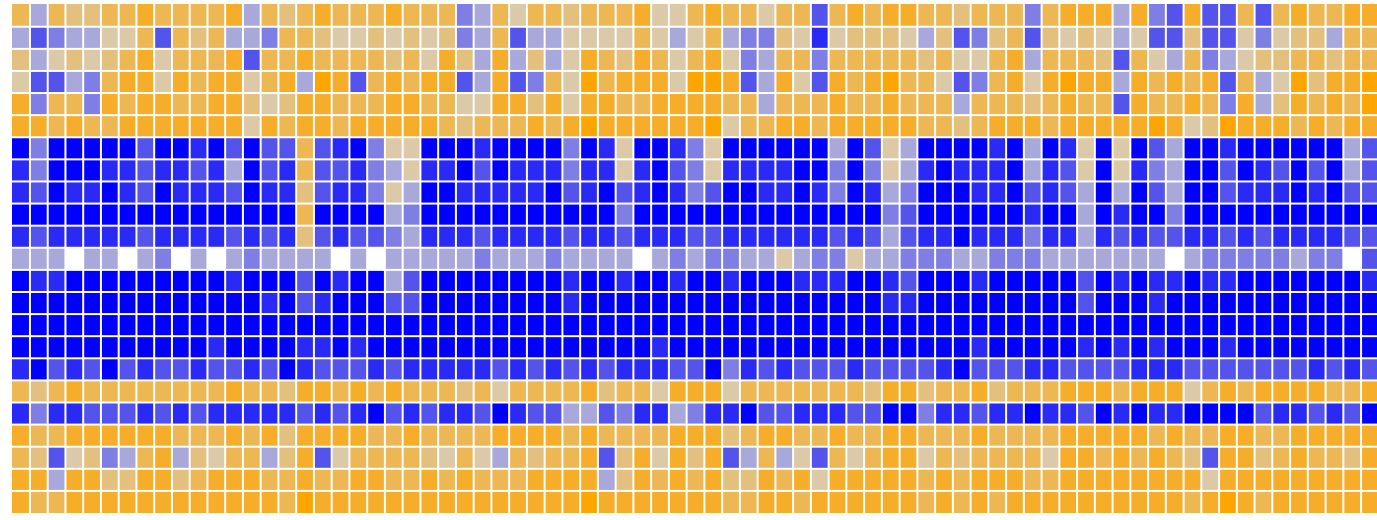

cg09369792  
 cg00660106  
 cg05306173  
 cg11102098  
 cg22621528  
 cg11693581  
 cg11772661  
 cg17136310  
 cg23047500  
 cg11079048  
 cg03449414  
 cg25586069  
 cg09820011  
 cg08874035  
 cg22975434  
 cg13331300  
 cg27539746  
 cg02861124  
 cg03968911  
 cg00750430  
 cg11182257  
 cg19263868  
 cg00542096

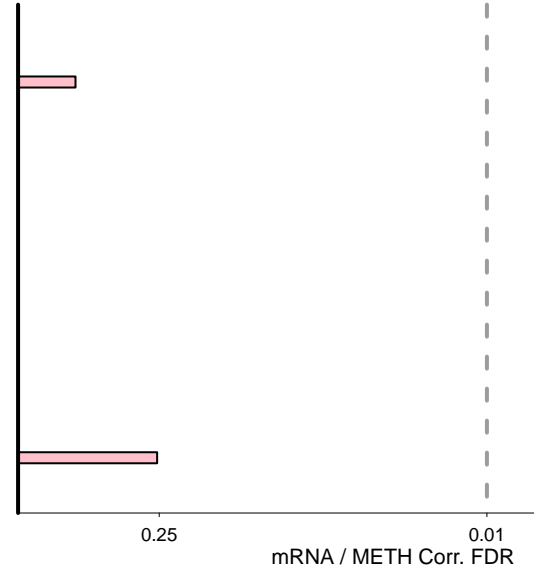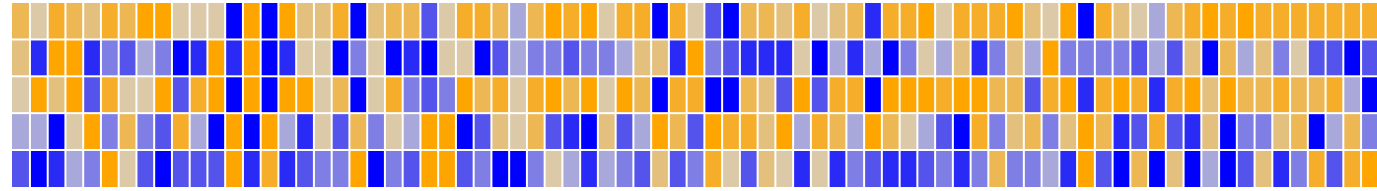

MITF  
 SOX10  
 TRPM1  
 ZEB1  
 AXL

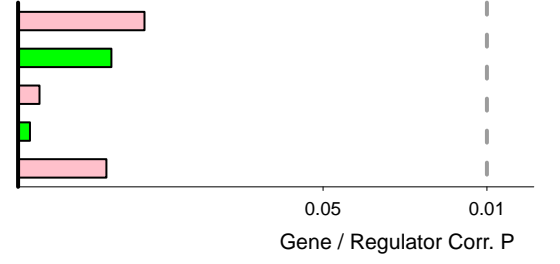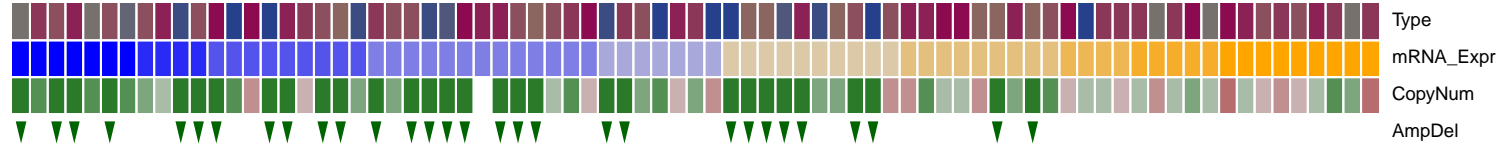

TCGA-EE-A3AH-06  
 TCGA-W3-AA21-06  
 TCGA-EE-A17Z-06  
 TCGA-FS-A1ZY-06  
 TCGA-D3-A3C6-06  
 TCGA-D3-A1O1-06  
 TCGA-EE-A2A5-06  
 TCGA-YG-AA3P-06  
 TCGA-ER-A3FS-06  
 TCGA-WE-A8ZQ-06  
 TCGA-DA-A95W-06  
 TCGA-DA-A11A-06  
 TCGA-EE-A26O-06  
 TCGA-GN-A811-06  
 TCGA-FS-A1ZC-06  
 TCGA-D9-A6EG-06  
 TCGA-EE-A29B-06  
 TCGA-FS-A1ZU-06  
 TCGA-FS-A1ZU-06  
 TCGA-EE-A2MM-06  
 TCGA-D3-A8GP-06  
 TCGA-W3-A8Z4-06  
 TCGA-DA-A95Z-06  
 TCGA-WE-A8K6-06  
 TCGA-WE-A8ZM-06  
 TCGA-EE-A1B5-06  
 TCGA-D3-A1QA-07  
 TCGA-GN-A26Z-06  
 TCGA-D3-A8GV-06  
 TCGA-FS-A1Z3-06  
 TCGA-RP-A690-06  
 TCGA-EE-A3JI-06  
 TCGA-FS-A1ZG-06  
 TCGA-D3-A3MO-06  
 TCGA-RP-A695-06  
 TCGA-D9-A1X3-06  
 TCGA-D3-A1Q5-06  
 TCGA-FS-A1Z2-06  
 TCGA-FR-A8YD-06  
 TCGA-LH-A90B-06  
 TCGA-EE-A20H-06  
 TCGA-FS-A4FB-06  
 TCGA-WE-A8JZ-06  
 TCGA-ER-A191-06  
 TCGA-EE-A3AD-06  
 TCGA-EE-A3J8-06  
 TCGA-EE-A3J7-06  
 TCGA-FR-A7I8-06  
 TCGA-ER-A4ZK-06  
 TCGA-FS-A4F9-06  
 TCGA-GN-A2E8-06  
 TCGA-D9-A4Z6-06  
 TCGA-D3-A8GK-06  
 TCGA-GN-A4U7-06  
 TCGA-FS-A1YW-06  
 TCGA-D9-A6EC-06  
 TCGA-EE-A1S0-06  
 TCGA-FS-A4F5-06  
 TCGA-D3-A8G1-06  
 TCGA-EE-A29A-06  
 TCGA-EE-A29D-06  
 TCGA-FS-A4F0-06  
 TCGA-3N-A9WB-06  
 TCGA-EE-A20C-06  
 TCGA-D3-A1QA-06  
 TCGA-FW-A3I3-06  
 TCGA-EE-A29L-06  
 TCGA-ER-A19F-06  
 TCGA-D3-A5G1-06  
 TCGA-FS-A1ZE-06  
 TCGA-EE-A29E-06  
 TCGA-FS-A1ZK-06  
 TCGA-D3-A8GC-06  
 TCGA-D3-A3M1-06

# RNF144A

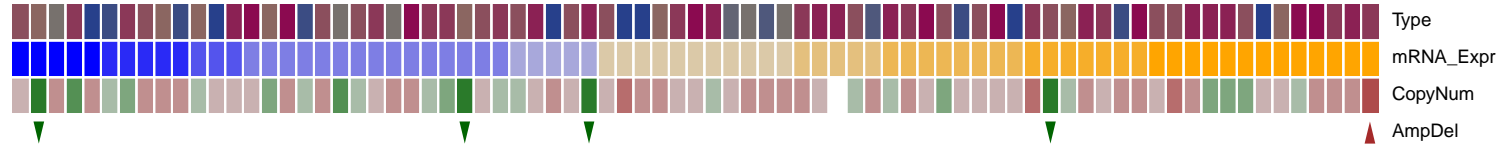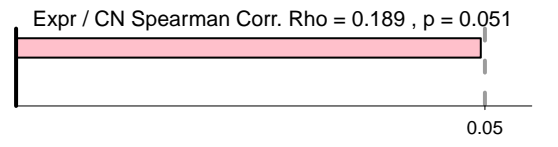

2: 7056075  
2: 7057153  
2: 7057227  
2: 7057245  
2: 7057385  
2: 7057395  
2: 7057402  
2: 7057945  
2: 7058390  
2: 7058432  
2: 7058545  
2: 7059030  
2: 7059760  
2: 7062351  
2: 7073095  
2: 7073129  
2: 7077912  
2: 7164527  
2: 7164586  
2: 7169401  
2: 7171869  
2: 7172297  
2: 7172511  
2: 7174685  
2: 7180026  
2: 7189116

GeneLoc  
PromoterAssoc  
CpGIsland

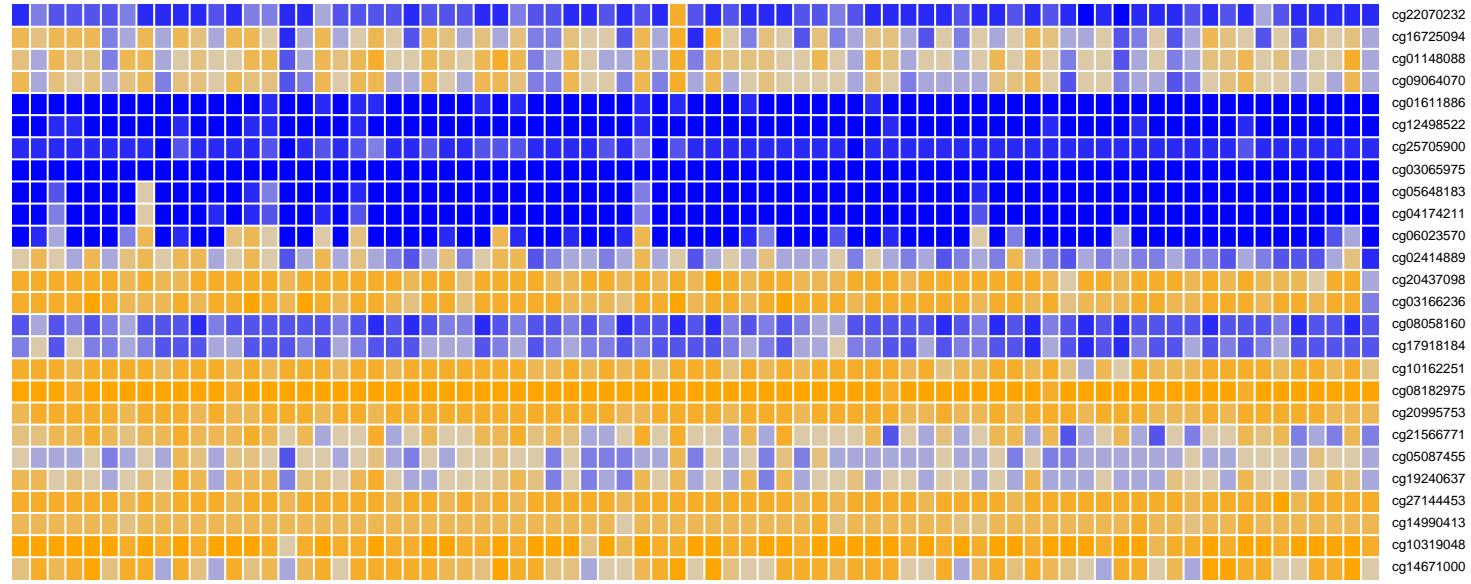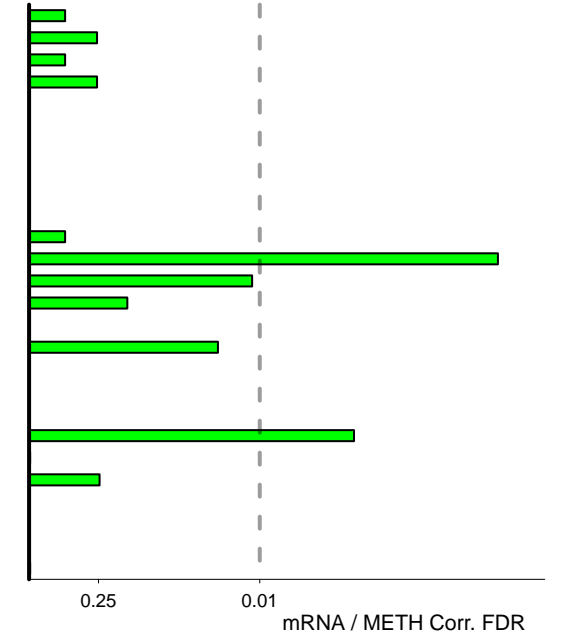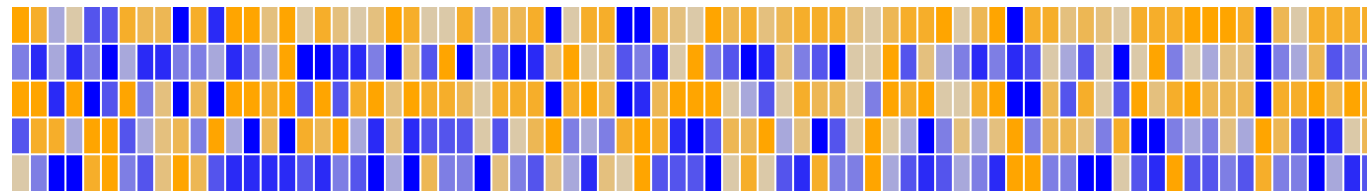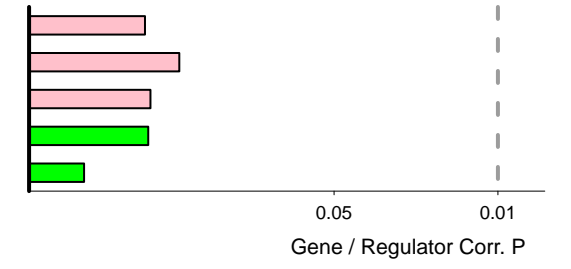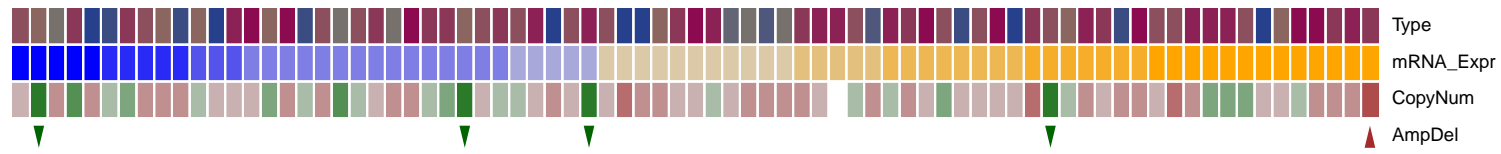

TCGA-RP-A690-06  
TCGA-FS-A1YW-06  
TCGA-EE-A20C-06  
TCGA-W3-AA21-06  
TCGA-LH-A90B-06  
TCGA-WE-A8K6-06  
TCGA-RP-A695-06  
TCGA-DA-A95Z-06  
TCGA-WE-A81Z-06  
TCGA-EE-A2MM-06  
TCGA-D9-A6EC-06  
TCGA-ER-A42K-06  
TCGA-D9-A6EG-06  
TCGA-PS-A1ZG-06  
TCGA-EE-A317-06  
TCGA-GN-A8L1-06  
TCGA-WE-A8Z0-06  
TCGA-PS-A4F9-06  
TCGA-D3-A3C6-06  
TCGA-DA-A95W-06  
TCGA-FS-A4F0-06  
TCGA-FW-A313-06  
TCGA-GN-A8LK-06  
TCGA-IN-A9WB-06  
TCGA-FR-A8YD-06  
TCGA-FS-A1ZJ-06  
TCGA-D3-A8GV-06  
TCGA-D3-A1QA-06  
TCGA-W3-A824-06  
TCGA-FS-A1ZZ-06  
TCGA-D3-A1Q5-06  
TCGA-D3-A8GI-06  
TCGA-EE-A3AD-06  
TCGA-ER-A19F-06  
TCGA-EE-A20H-06  
TCGA-EE-A29A-06  
TCGA-FS-A4FB-06  
TCGA-EE-A29B-06  
TCGA-DA-A11A-06  
TCGA-ER-A3ES-06  
TCGA-EE-A2A5-06  
TCGA-ER-A191-06  
TCGA-EE-A3AH-06  
TCGA-D3-A5GI-06  
TCGA-EE-A29F-06  
TCGA-D3-A1Q8-07  
TCGA-PS-A1ZU-06  
TCGA-WE-A8ZM-06  
TCGA-PS-A1ZY-06  
TCGA-PS-A1ZK-06  
TCGA-GN-A417-06  
TCGA-YG-AA3P-06  
TCGA-D3-A3MO-06  
TCGA-FR-A7U8-06  
TCGA-D3-A8GL-06  
TCGA-EE-A2G0-06  
TCGA-D3-A3ML-06  
TCGA-FS-A1ZE-06  
TCGA-FS-A4F5-06  
TCGA-GN-A262-06  
TCGA-D3-A8GP-06  
TCGA-EE-A3J8-06  
TCGA-EE-A185-06  
TCGA-EE-A17Z-06  
TCGA-D3-A1Q1-06  
TCGA-D9-A4Z6-06  
TCGA-EE-A2GR-06  
TCGA-EE-A180-06  
TCGA-D9-A1X3-06  
TCGA-FS-A1ZC-06  
TCGA-PS-A1Z3-06  
TCGA-D3-A8GK-06  
TCGA-EE-A291-06  
TCGA-EE-A3JI-06  
TCGA-GN-A268-06  
TCGA-EE-A29D-06

# RUNX3

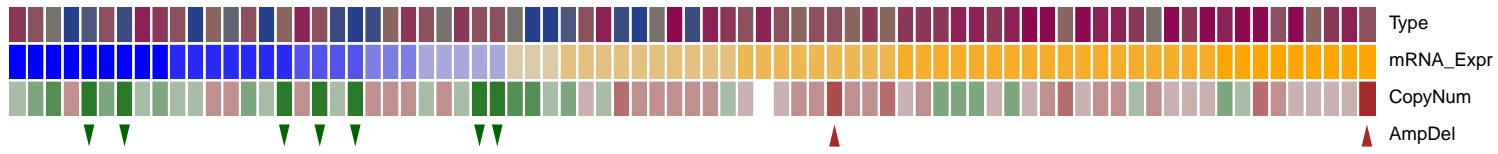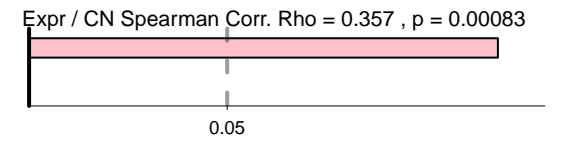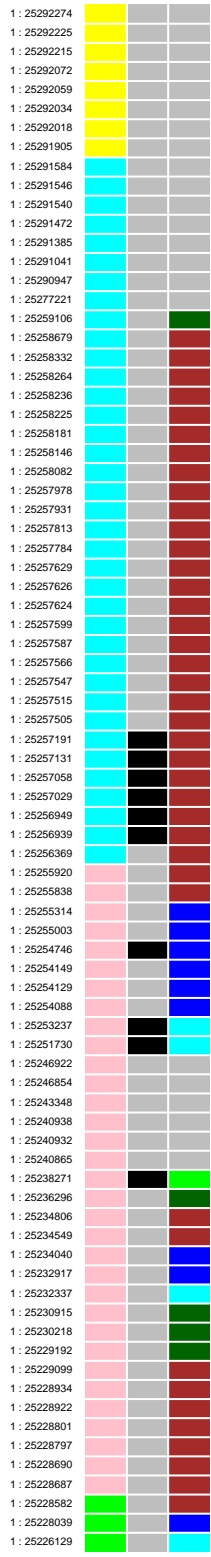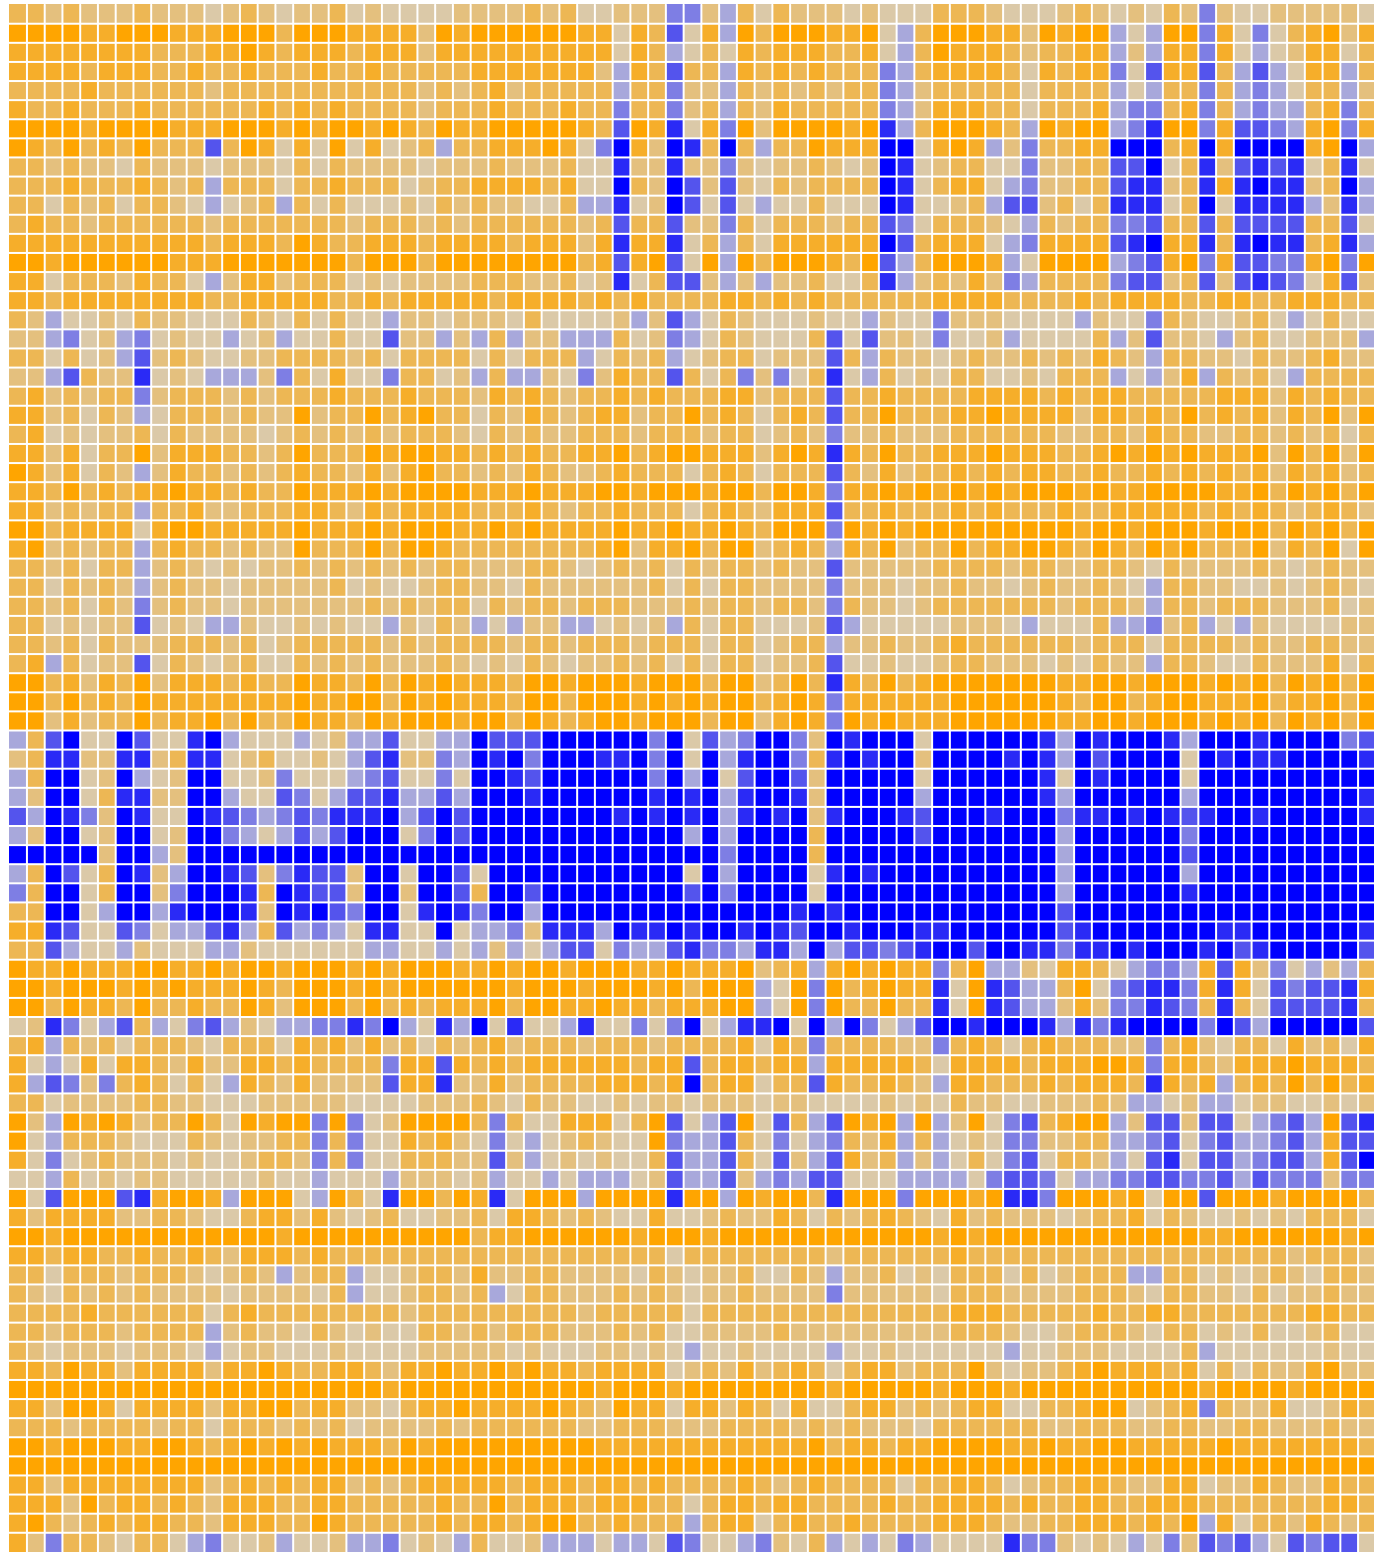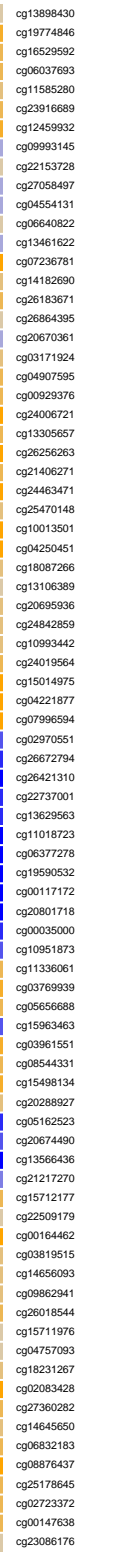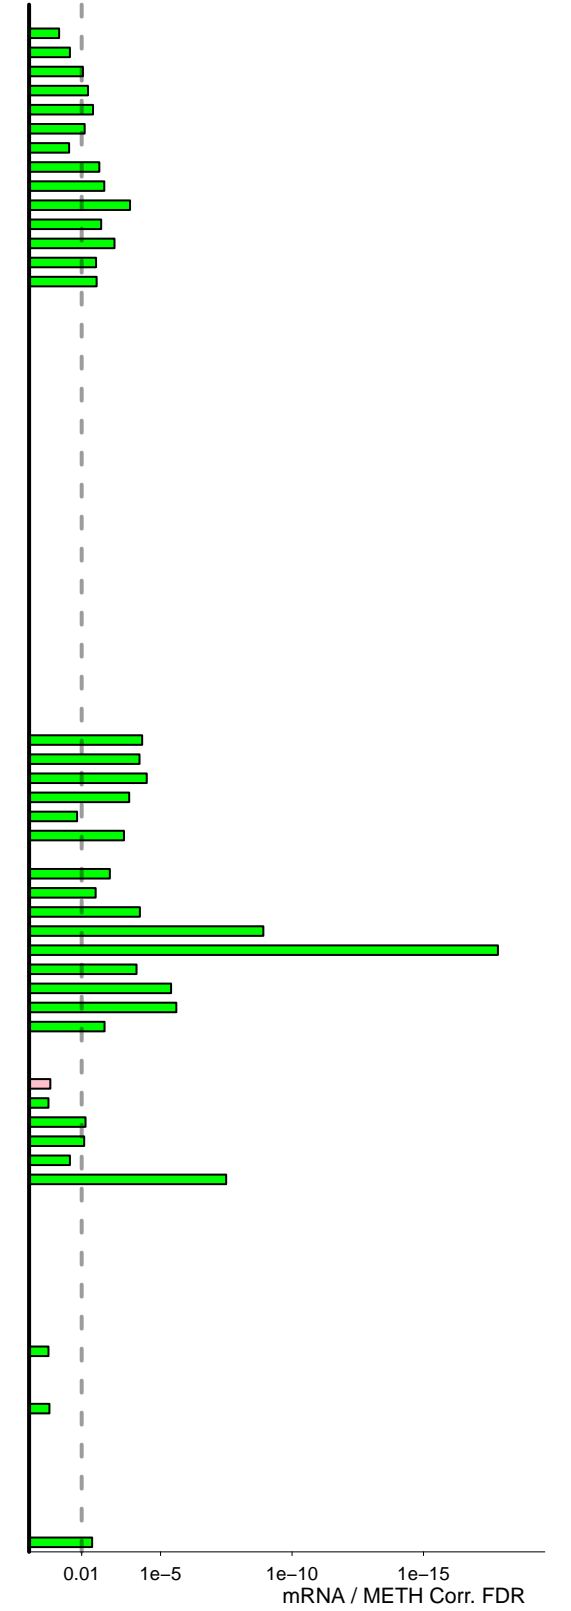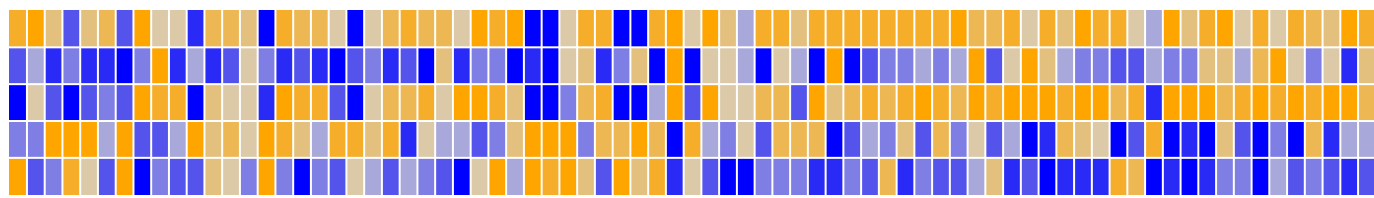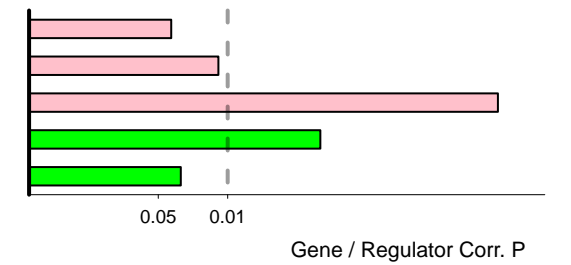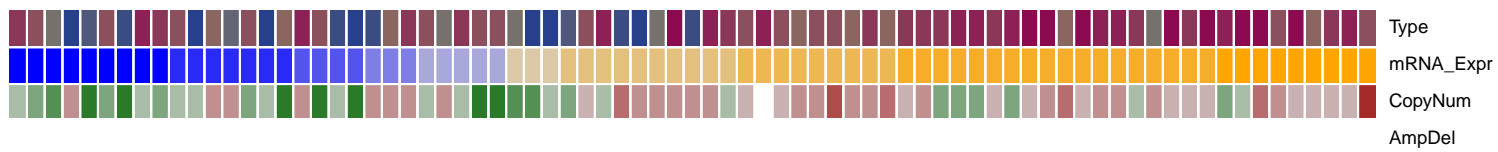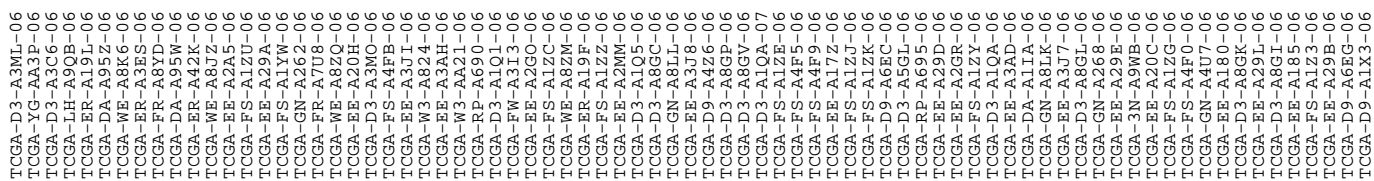

# IGSF3

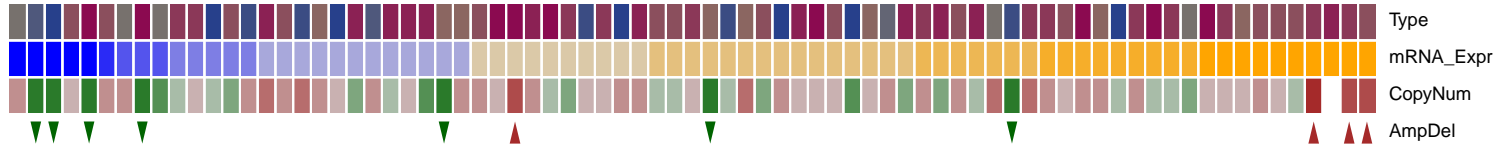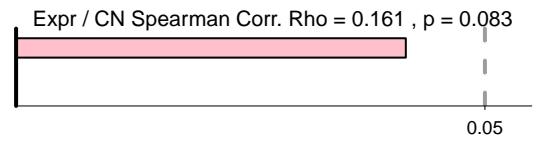

1: 117210620  
1: 117210575  
1: 117210557  
1: 117210332  
1: 117210276  
1: 117209954  
1: 117209947  
1: 117209641  
1: 117208496  
1: 117208338  
1: 117206442  
1: 117152162  
1: 117151711  
1: 117149598  
1: 117142844  
1: 117142678  
1: 117129532  
1: 117127724  
1: 117127620  
1: 117117195

GeneLoc  
PromoterAssoc  
CpGIsland

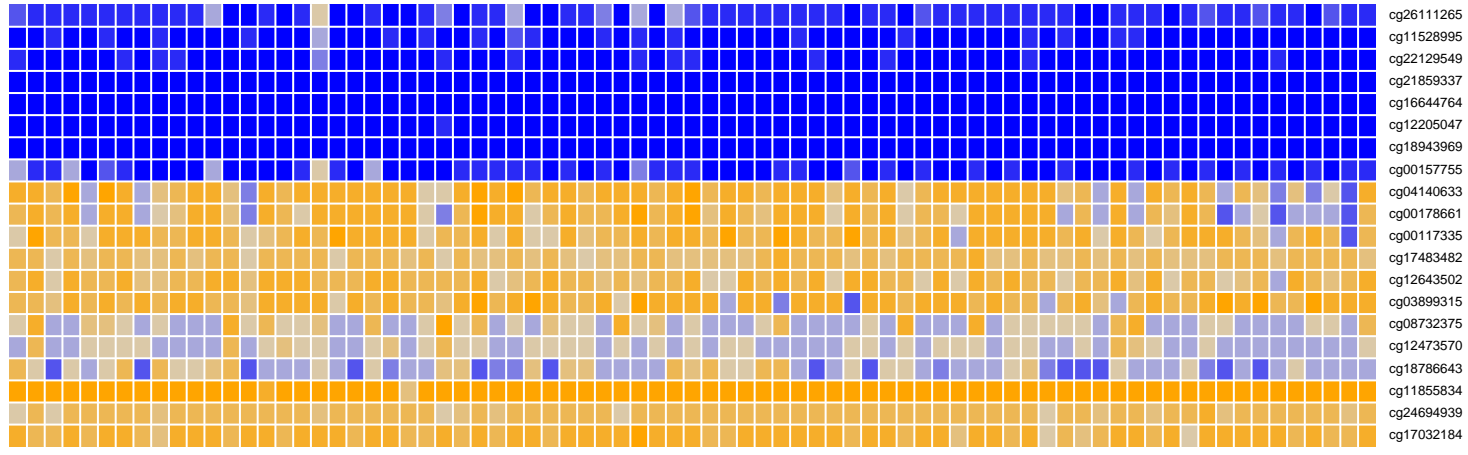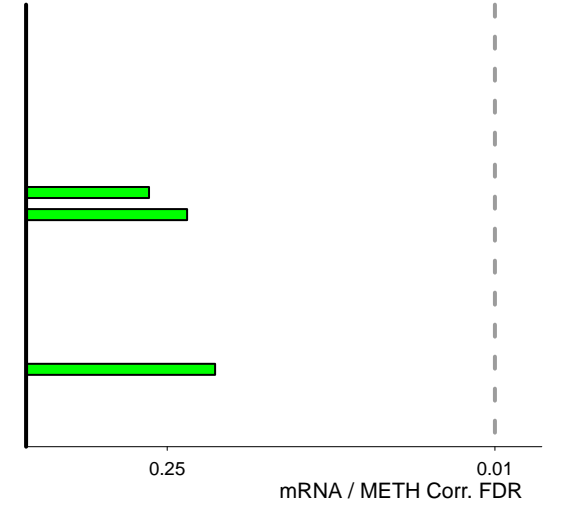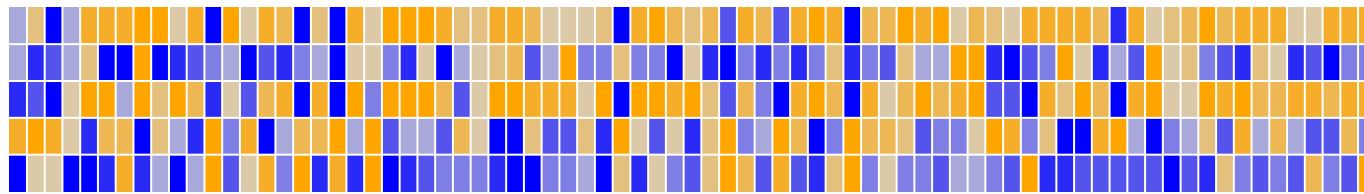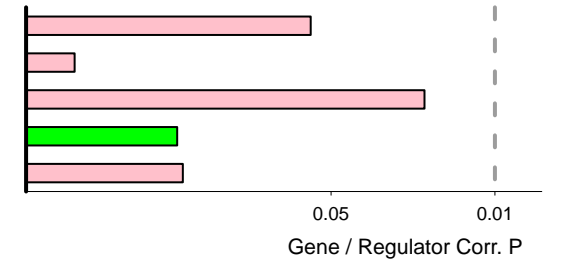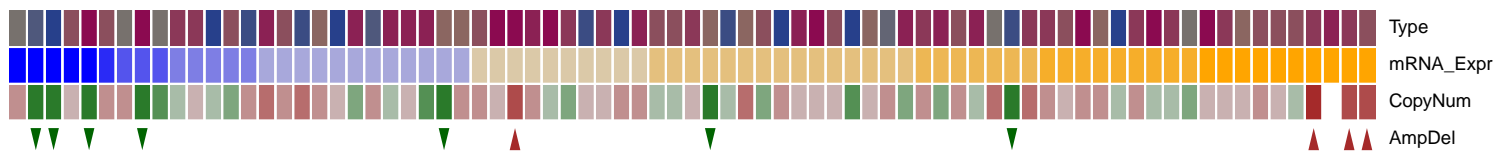

TCGA-EE-A20C-06  
TCGA-ER-A19L-06  
TCGA-EE-A20H-06  
TCGA-D3-A8GV-06  
TCGA-GN-A8LK-06  
TCGA-FS-A4F9-06  
TCGA-D3-A8GC-06  
TCGA-GN-A8LL-06  
TCGA-FW-A3I3-06  
TCGA-W3-AA21-06  
TCGA-EE-A3JI-06  
TCGA-EE-A29A-06  
TCGA-YG-AA3D-06  
TCGA-EE-A3J8-06  
TCGA-EE-A29F-06  
TCGA-FR-A7U8-06  
TCGA-EE-A2MM-06  
TCGA-EE-A3J7-06  
TCGA-FS-A1ZC-06  
TCGA-EE-A3AD-06  
TCGA-WE-A8ZM-06  
TCGA-ER-A3ES-06  
TCGA-D9-A6EG-06  
TCGA-D9-A4Z6-06  
TCGA-FS-A1ZJ-06  
TCGA-FS-A4F5-06  
TCGA-FS-A1ZU-06  
TCGA-GN-A4U7-06  
TCGA-EE-A29L-06  
TCGA-GN-A262-06  
TCGA-D3-A8GK-06  
TCGA-FR-A8YD-06  
TCGA-D3-A3MO-06  
TCGA-D3-A4F0-06  
TCGA-D3-A1Q5-06  
TCGA-GN-A268-06  
TCGA-RP-A690-06  
TCGA-W3-A824-06  
TCGA-EE-A29B-06  
TCGA-WE-A8JZ-06  
TCGA-WE-A8K6-06  
TCGA-D9-A6FC-06  
TCGA-DA-A95Z-06  
TCGA-LH-A90B-06  
TCGA-FS-A1Z2-06  
TCGA-ER-A19F-06  
TCGA-EE-A2GO-06  
TCGA-FS-A1Z3-06  
TCGA-EE-A2J5-06  
TCGA-EE-A180-06  
TCGA-FE-A6S5-06  
TCGA-EE-A28N-06  
TCGA-D3-A8G1-06  
TCGA-FS-A1Z1-06  
TCGA-D3-A3C6-06  
TCGA-WE-A8ZQ-06  
TCGA-D3-A3ML-06  
TCGA-EE-A17Z-06  
TCGA-EE-A185-06  
TCGA-FS-A4FB-06  
TCGA-ER-A42K-06  
TCGA-FS-A1ZK-06  
TCGA-DA-A1IA-06  
TCGA-D3-A8GP-06  
TCGA-EE-A3AH-06  
TCGA-D3-A8GL-06  
TCGA-FS-A1YW-06  
TCGA-D9-A1X3-06  
TCGA-FS-A1ZE-06  
TCGA-DA-A95W-06  
TCGA-3N-A9WB-06  
TCGA-D3-A1QA-07  
TCGA-EE-A29D-06  
TCGA-D3-A1Q1-06

Type  
mRNA\_Expr  
CopyNum  
AmpDel

# ST3GAL6

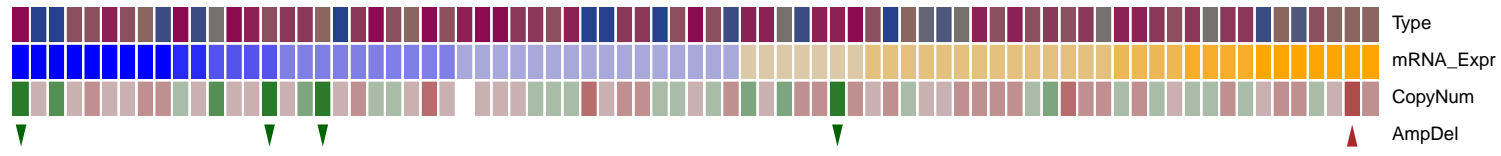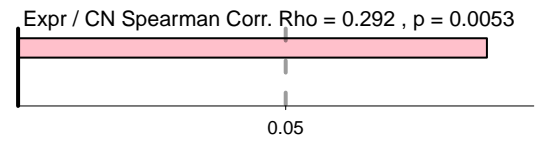

3 : 98451002  
 3 : 98451116  
 3 : 98451119  
 3 : 98451287  
 3 : 98451398  
 3 : 98451718  
 3 : 98452218  
 3 : 98452812  
 3 : 98452879  
 3 : 98452940  
 3 : 98453086  
 3 : 98482769  
 3 : 98512690  
 3 : 98517048

GeneLoc  
 PromoterAssoc  
 CpGIsland

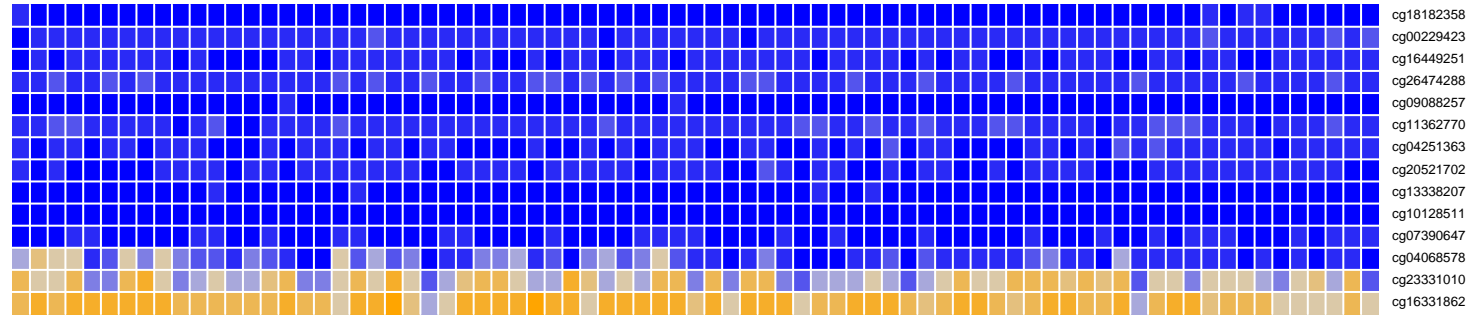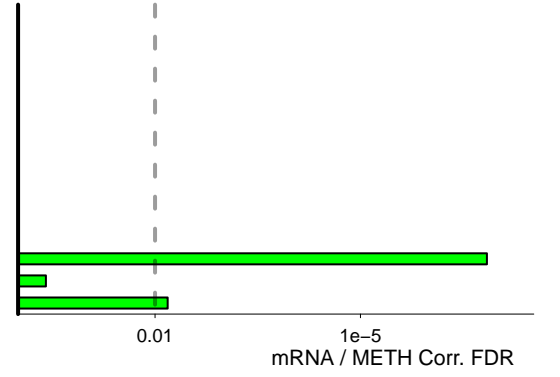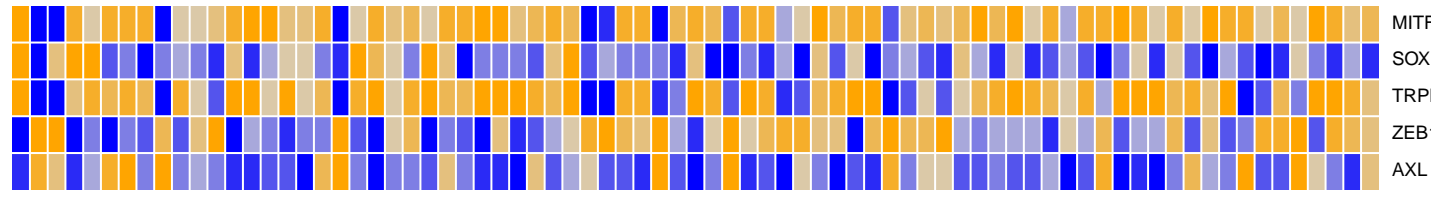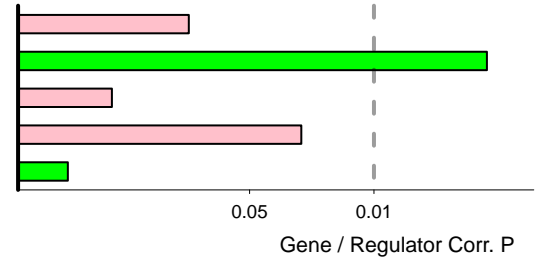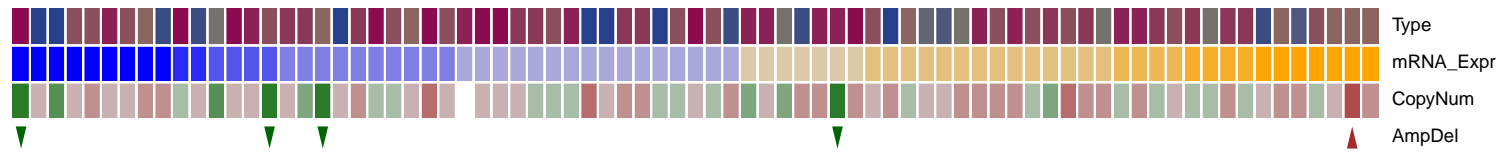

TCGA-GN-A8LL-06  
 TCGA-FS-A1ZC-06  
 TCGA-D3-A1Q5-06  
 TCGA-EE-A17Z-06  
 TCGA-D3-A8GI-06  
 TCGA-EE-A29E-06  
 TCGA-D3-A1Q1-06  
 TCGA-FS-A1ZJ-06  
 TCGA-EE-A2MM-06  
 TCGA-D3-A8GK-06  
 TCGA-D3-A3MO-06  
 TCGA-D3-A3C6-06  
 TCGA-GN-A4U7-06  
 TCGA-D9-A6EG-06  
 TCGA-YG-A83P-06  
 TCGA-EE-A29B-06  
 TCGA-D3-A8GP-06  
 TCGA-D9-A8EC-06  
 TCGA-EE-A2GO-06  
 TCGA-FR-A81D-06  
 TCGA-EE-A29L-06  
 TCGA-FS-A1ZU-06  
 TCGA-FS-A1Z3-06  
 TCGA-DA-A1IA-06  
 TCGA-ER-A19F-06  
 TCGA-D3-A1QA-07  
 TCGA-FS-A1ZG-06  
 TCGA-D3-A8GL-06  
 TCGA-FS-A4F0-06  
 TCGA-D3-A1QA-06  
 TCGA-D9-A1X3-06  
 TCGA-FS-A1ZY-06  
 TCGA-EE-A20H-06  
 TCGA-ER-A42K-06  
 TCGA-EE-A29D-06  
 TCGA-EE-A29A-06  
 TCGA-D3-A5GL-06  
 TCGA-DA-A95Z-06  
 TCGA-GN-A8LK-06  
 TCGA-W3-A824-06  
 TCGA-WE-A8K6-06  
 TCGA-GN-A268-06  
 TCGA-FS-A1ZZ-06  
 TCGA-EE-A20C-06  
 TCGA-EE-A378-06  
 TCGA-EE-A180-06  
 TCGA-GN-A262-06  
 TCGA-EE-A185-06  
 TCGA-FS-A4F9-06  
 TCGA-LH-A9QB-06  
 TCGA-FS-A4F5-06  
 TCGA-EE-A4A5-06  
 TCGA-ER-A19L-06  
 TCGA-EE-A3AH-06  
 TCGA-EE-A2SR-06  
 TCGA-FR-A708-06  
 TCGA-D9-A4Z6-06  
 TCGA-DA-A95W-06  
 TCGA-EE-A3J1-06  
 TCGA-D3-A8GV-06  
 TCGA-FS-A1ZK-06  
 TCGA-D3-A8GC-06  
 TCGA-ER-A3ES-06  
 TCGA-EE-A3AD-06  
 TCGA-W3-AA21-06  
 TCGA-FS-A1ZE-06  
 TCGA-3N-A9WB-06  
 TCGA-FW-A313-06  
 TCGA-RP-A695-06  
 TCGA-D3-A3ML-06  
 TCGA-WE-A8ZQ-06  
 TCGA-FS-A4FB-06  
 TCGA-WE-A8ZM-06  
 TCGA-RP-A690-06  
 TCGA-FS-A1YW-06  
 TCGA-EE-A3J7-06  
 TCGA-WE-A8JZ-06



# GAS7

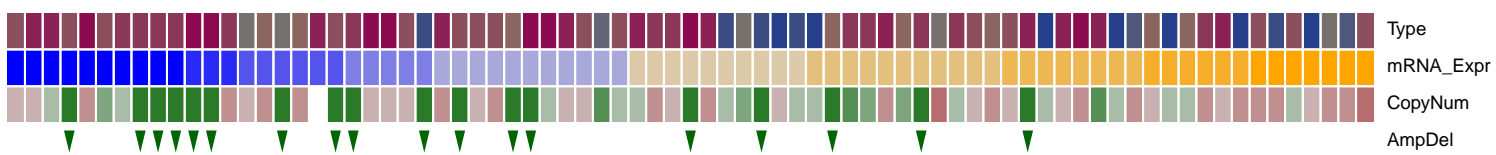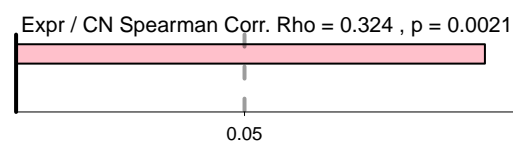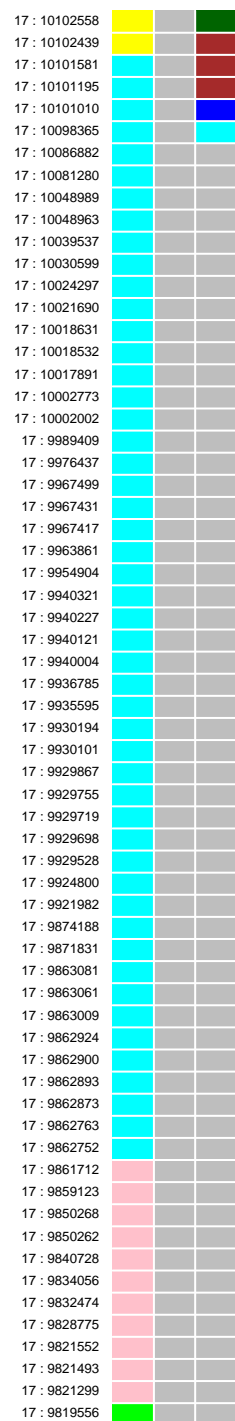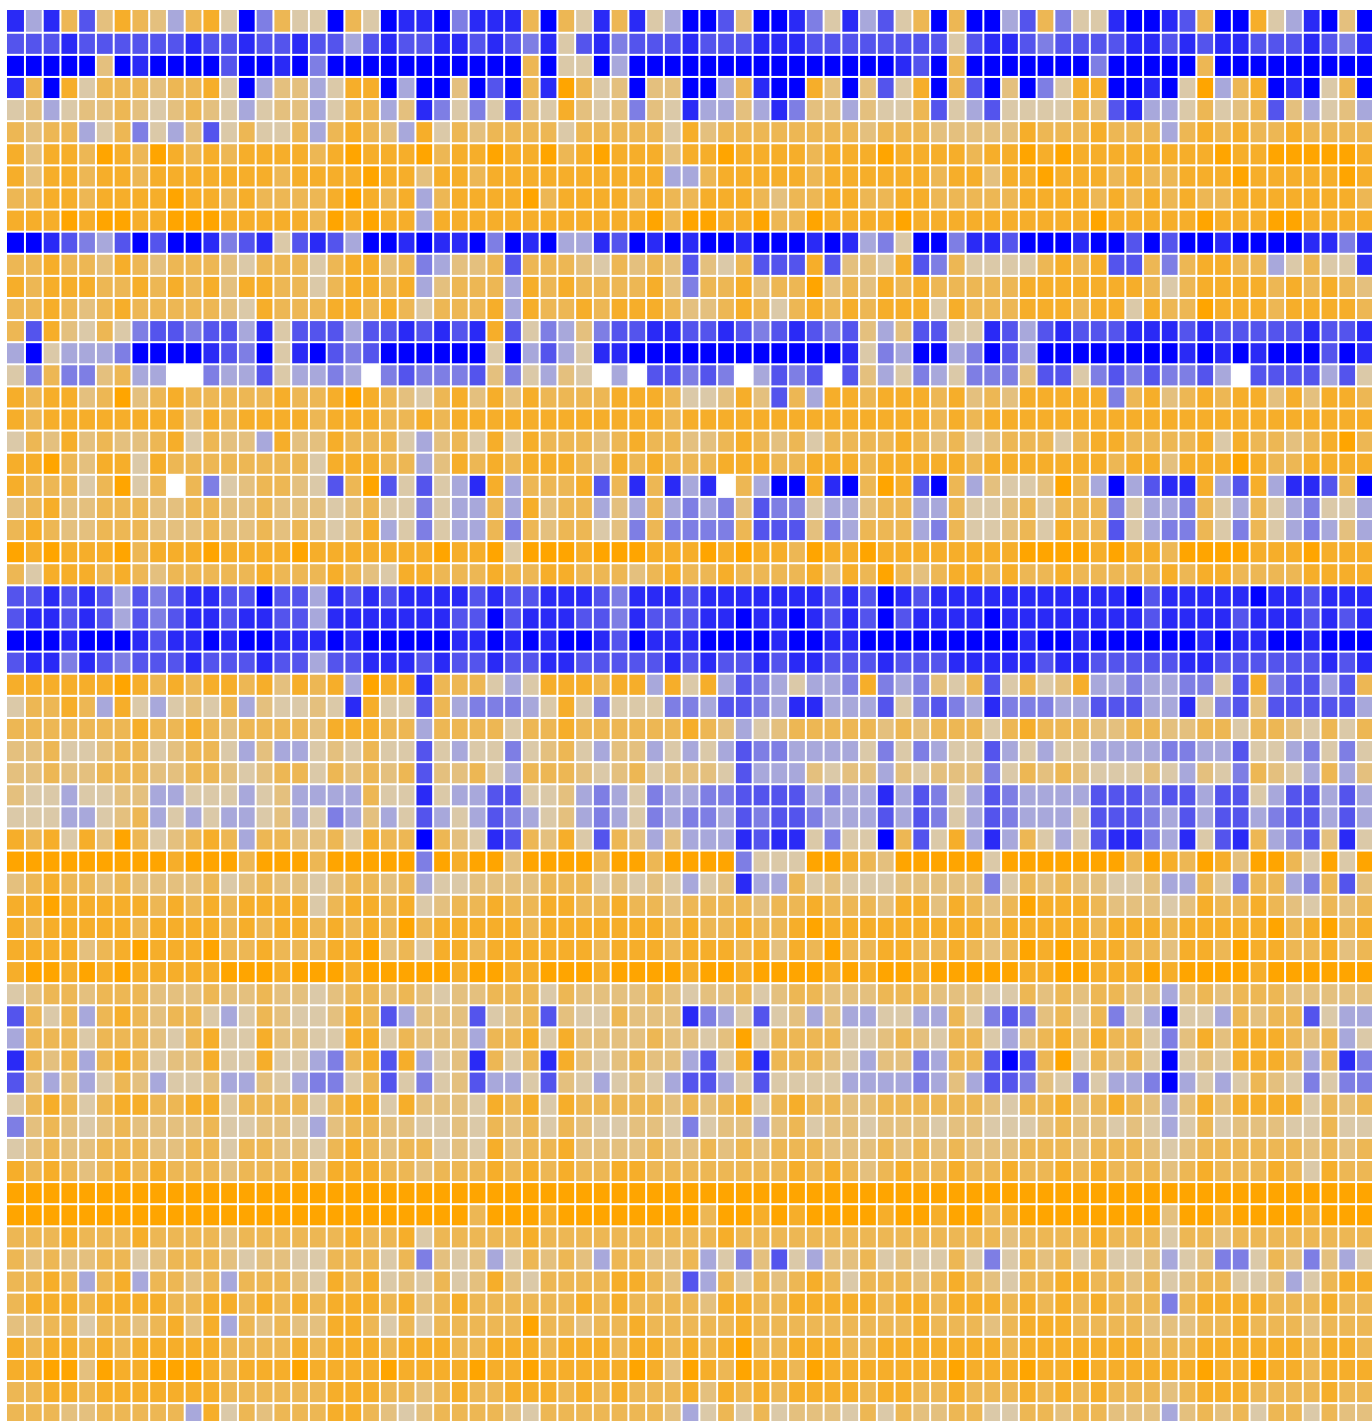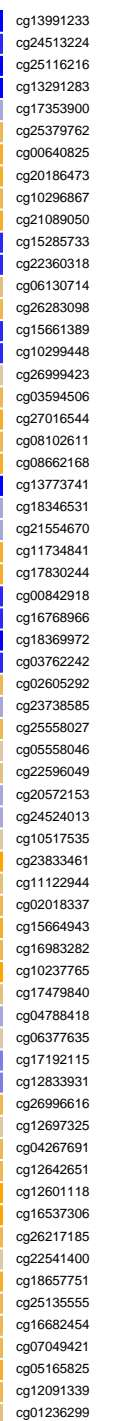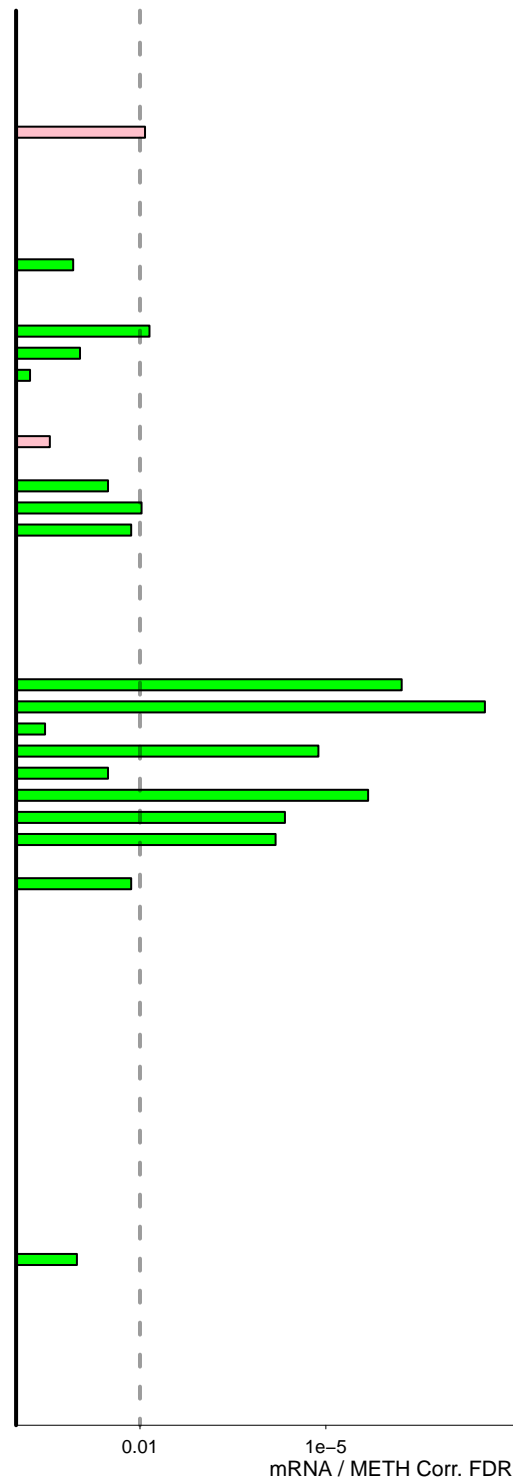

Genes  
PromoterAssoc  
CpGIsland

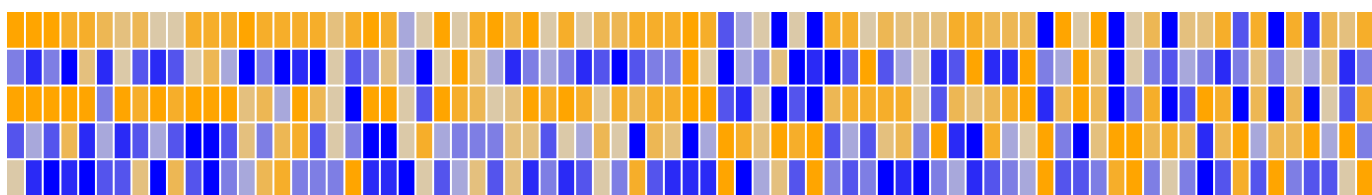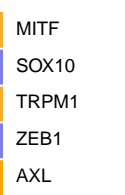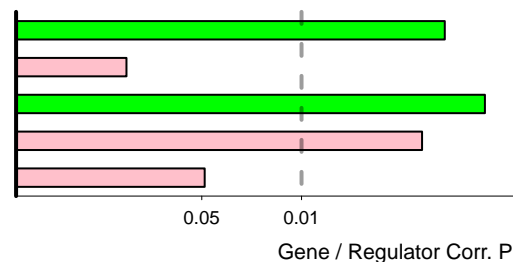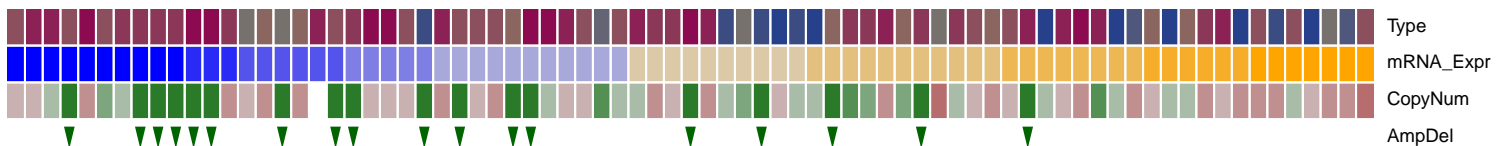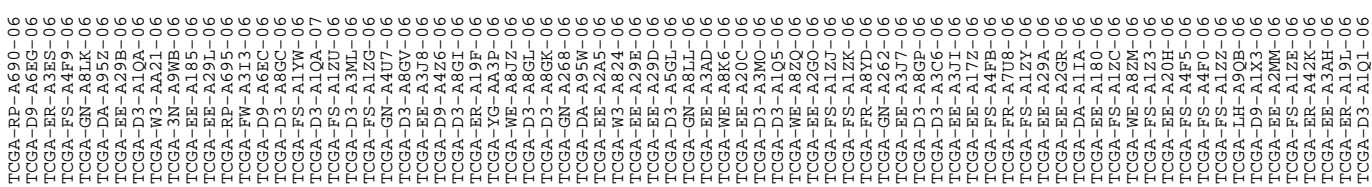

# AP1S2

X : 15874162  
 X : 15873761  
 X : 15873481  
 X : 15873351  
 X : 15873337  
 X : 15873330  
 X : 15873151  
 X : 15872951  
 X : 15872521  
 X : 15872216  
 X : 15871902  
 X : 15869341  
 X : 15866587

GeneLoc  
 PromoterAssoc  
 CpGIsland

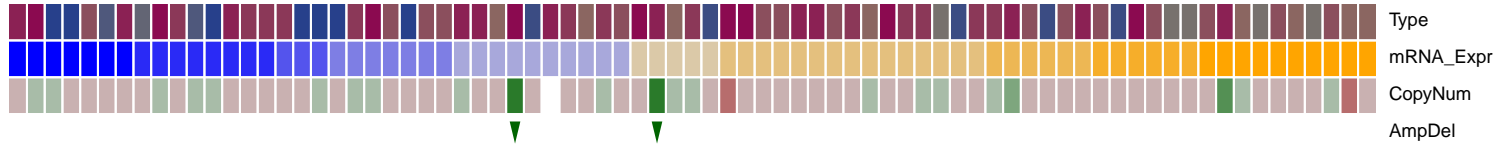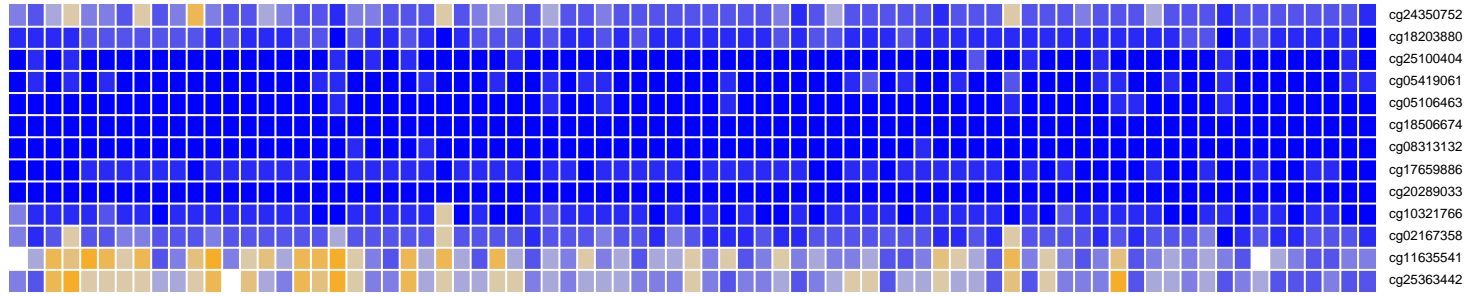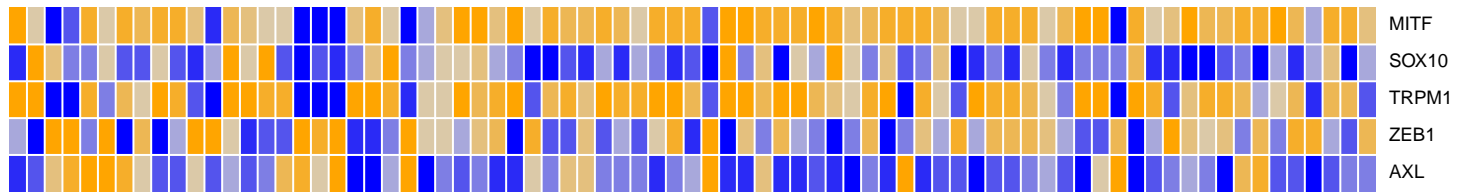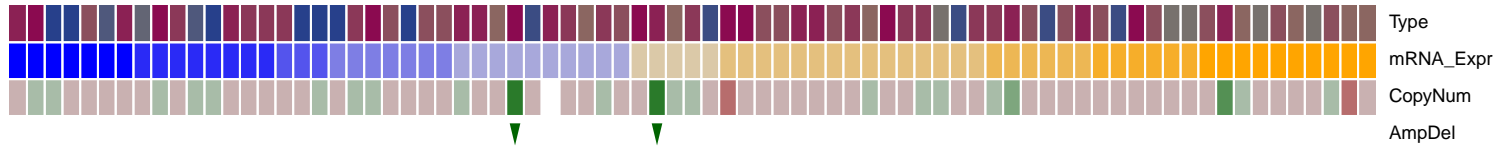

TCGA-D9-A6EG-06  
 TCGA-DA-A1IA-06  
 TCGA-D3-A1O5-06  
 TCGA-LH-A9OB-06  
 TCGA-D3-A1O1-06  
 TCGA-WE-A8ZM-06  
 TCGA-EE-A29E-06  
 TCGA-EE-A2A5-06  
 TCGA-EE-A185-06  
 TCGA-FS-A1ZK-06  
 TCGA-ER-A191-06  
 TCGA-ER-A42K-06  
 TCGA-FS-A1ZY-06  
 TCGA-EE-A29B-06  
 TCGA-PR-A8YD-06  
 TCGA-3N-A9WE-06  
 TCGA-FS-A1ZC-06  
 TCGA-EE-A2OH-06  
 TCGA-EE-A2GO-06  
 TCGA-FS-A4FU-06  
 TCGA-GN-A8LK-06  
 TCGA-D3-A8G1-06  
 TCGA-EE-A29A-06  
 TCGA-D3-A8GV-06  
 TCGA-FS-A1ZU-06  
 TCGA-D9-A4Z6-06  
 TCGA-EE-A180-06  
 TCGA-EE-A3J7-06  
 TCGA-FS-A1ZG-06  
 TCGA-EE-A3J8-06  
 TCGA-D3-A1QA-07  
 TCGA-D3-A1QA-06  
 TCGA-WE-A8JZ-06  
 TCGA-PP-A695-06  
 TCGA-FR-A7I8-06  
 TCGA-D3-A89K-06  
 TCGA-GN-A268-06  
 TCGA-FS-A1YW-06  
 TCGA-EE-A3JI-06  
 TCGA-WE-A8K6-06  
 TCGA-GN-A8LL-06  
 TCGA-D3-A8GL-06  
 TCGA-ER-A19F-06  
 TCGA-FS-A4F9-06  
 TCGA-EE-A3AD-06  
 TCGA-EE-A2GR-06  
 TCGA-EE-A17Z-06  
 TCGA-D3-A8GP-06  
 TCGA-FS-A1Z3-06  
 TCGA-GN-A4I7-06  
 TCGA-D3-A3ML-06  
 TCGA-D3-A5GL-06  
 TCGA-EE-A3AH-06  
 TCGA-WE-A8ZQ-06  
 TCGA-W3-AAZ1-06  
 TCGA-EE-A29D-06  
 TCGA-FS-A1ZE-06  
 TCGA-D3-A3MO-06  
 TCGA-DA-A95Z-06  
 TCGA-ER-A3ES-06  
 TCGA-PP-A690-06  
 TCGA-EE-A2MM-06  
 TCGA-EE-A29L-06  
 TCGA-DA-A95W-06  
 TCGA-D3-A3C6-06  
 TCGA-FW-A3I3-06  
 TCGA-W3-A824-06  
 TCGA-GN-A262-06  
 TCGA-D9-A6EC-06  
 TCGA-D3-A8GC-06  
 TCGA-YG-AA3P-06  
 TCGA-FS-A4FB-06  
 TCGA-EE-A20C-06  
 TCGA-D9-A1X3-06  
 TCGA-FS-A1ZJ-06  
 TCGA-FS-A4F5-06

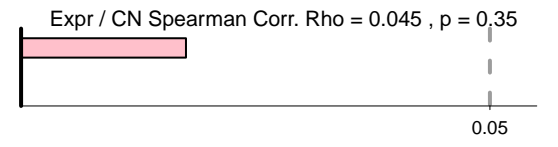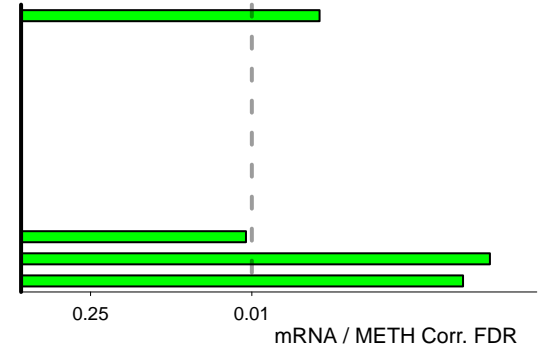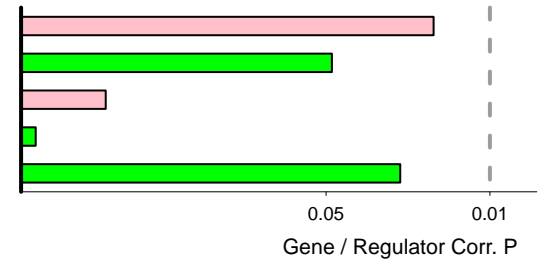

# FCRLA

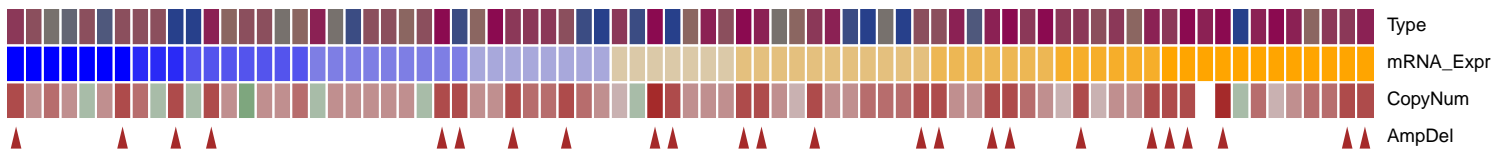

1: 161676266  
 1: 161676469  
 1: 161676581  
 1: 161679461  
 1: 161679921

GeneLoc  
 PromoterAssoc  
 CpGIsland

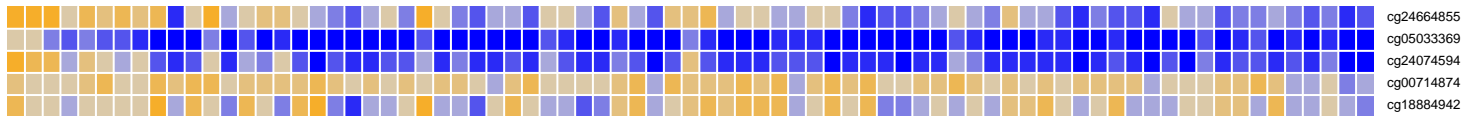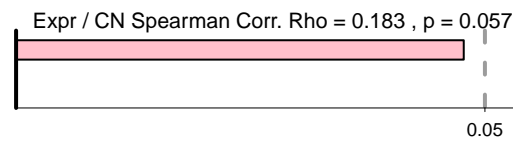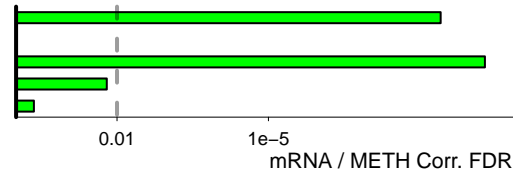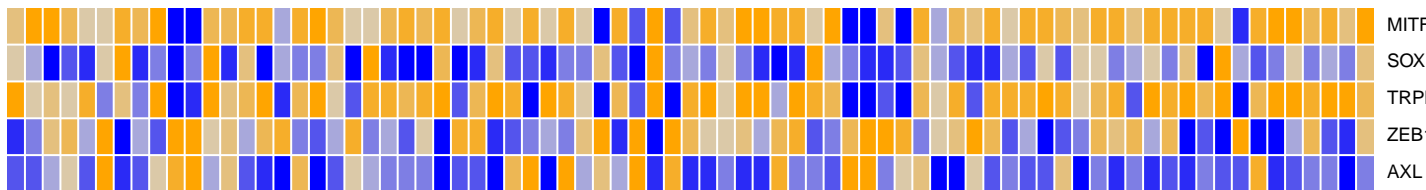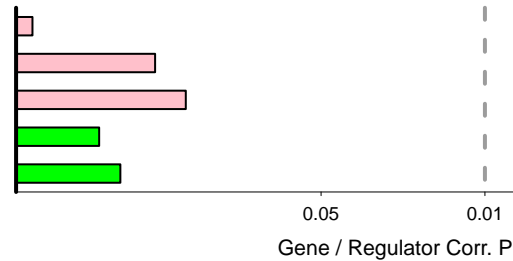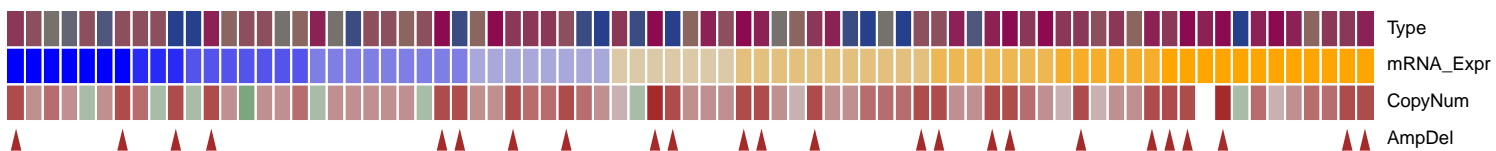

TCGA-EE-A29B-06  
 TCGA-YG-AA3P-06  
 TCGA-FW-A3I3-06  
 TCGA-EE-A2A5-06  
 TCGA-DA-A95W-06  
 TCGA-WE-A8ZM-06  
 TCGA-EE-A17Z-06  
 TCGA-DA-A95Z-06  
 TCGA-EP-A690-06  
 TCGA-FS-A1ZC-06  
 TCGA-EE-A29A-06  
 TCGA-FS-A1ZY-06  
 TCGA-WE-A87Z-06  
 TCGA-D9-A1X3-06  
 TCGA-FS-A4F9-06  
 TCGA-EE-A20C-06  
 TCGA-D9-A6EC-06  
 TCGA-ER-A3ES-06  
 TCGA-EE-A3AH-06  
 TCGA-EE-A3J8-06  
 TCGA-D3-A6GI-06  
 TCGA-FR-A7U8-06  
 TCGA-FS-A1ZJ-06  
 TCGA-W3-A6Z4-06  
 TCGA-EE-A29L-06  
 TCGA-WE-A8ZQ-06  
 TCGA-FS-A4FB-06  
 TCGA-GN-A8LK-06  
 TCGA-3N-A9WB-06  
 TCGA-D3-A3ML-06  
 TCGA-W3-AA21-06  
 TCGA-D3-A1Q1-06  
 TCGA-D3-A3MO-06  
 TCGA-D3-A1Q5-06  
 TCGA-EE-A3JI-06  
 TCGA-WE-A8K6-06  
 TCGA-GN-A8LL-06  
 TCGA-LH-A9QB-06  
 TCGA-EE-A3J7-06  
 TCGA-GN-A268-06  
 TCGA-FS-A1ZU-06  
 TCGA-D9-A6EG-06  
 TCGA-D3-A8GL-06  
 TCGA-D3-A8GC-06  
 TCGA-FS-A1YW-06  
 TCGA-FR-A8YD-06  
 TCGA-EE-A2GR-06  
 TCGA-EE-A2MW-06  
 TCGA-D3-A3C6-06  
 TCGA-EE-A20H-06  
 TCGA-ER-A19F-06  
 TCGA-D3-A6GV-06  
 TCGA-GN-A262-06  
 TCGA-ER-A19L-06  
 TCGA-FS-A1ZZ-06  
 TCGA-D3-A6GK-06  
 TCGA-FS-A1ZK-06  
 TCGA-EE-A185-06  
 TCGA-D3-A1QA-06  
 TCGA-D3-A8GP-06  
 TCGA-FS-A1ZE-06  
 TCGA-D3-A5GL-06  
 TCGA-FS-A4F5-06  
 TCGA-EE-A3AD-06  
 TCGA-EE-A29D-06  
 TCGA-GN-A4U7-06  
 TCGA-D3-A1QA-07  
 TCGA-DA-A1IA-06  
 TCGA-ER-A42K-06  
 TCGA-EE-A29E-06  
 TCGA-FS-A1ZG-06  
 TCGA-D9-A4Z6-06  
 TCGA-FS-A1Z3-06  
 TCGA-EP-A695-06  
 TCGA-FS-A4F0-06  
 TCGA-EE-A180-06

# TSPAN10

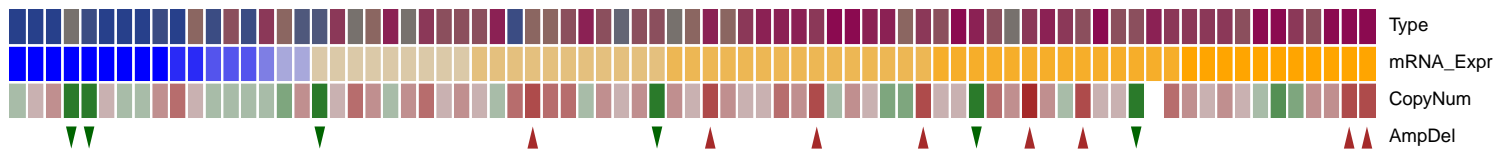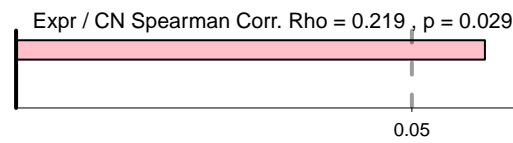

17 : 79603513  
 17 : 79603628  
 17 : 79603768  
 17 : 79603854  
 17 : 79604207  
 17 : 79604213  
 17 : 79604227  
 17 : 79604293  
 17 : 79604305  
 17 : 79604375  
 17 : 79604385  
 17 : 79606645  
 17 : 79609067  
 17 : 79609095  
 17 : 79609290  
 17 : 79609346  
 17 : 79612816  
 17 : 79614917  
 17 : 79615101  
 17 : 79615552  
 17 : 79615652

GeneLoc  
 PromoterAssoc  
 CpGIsland

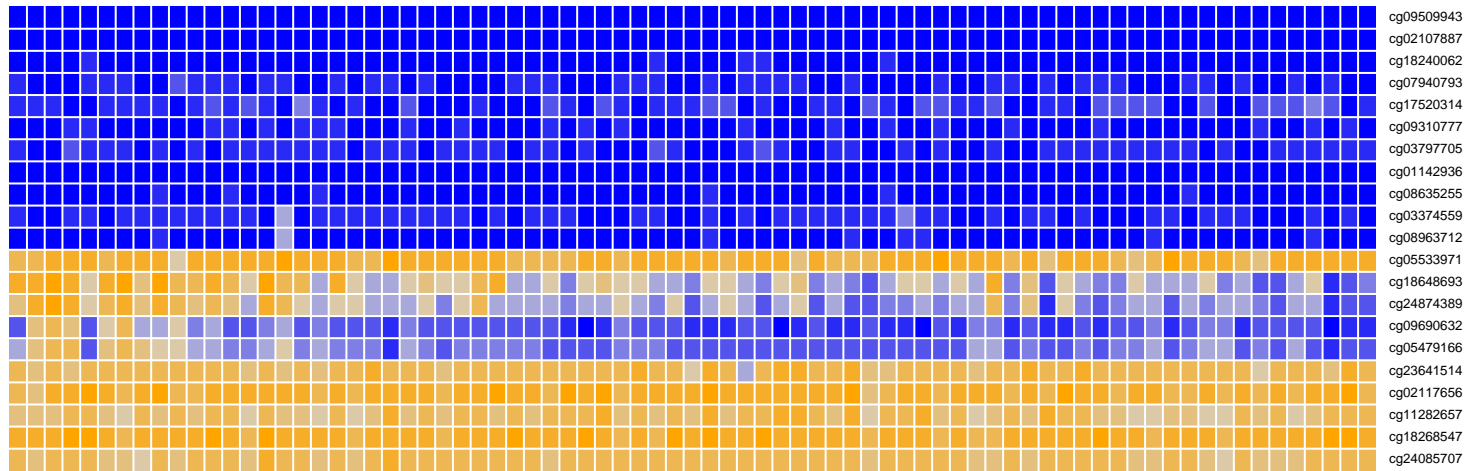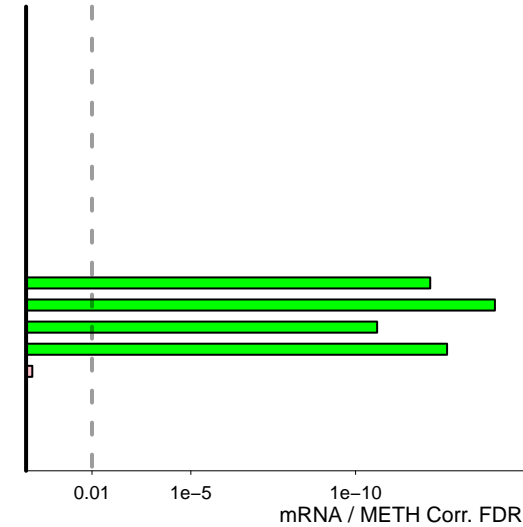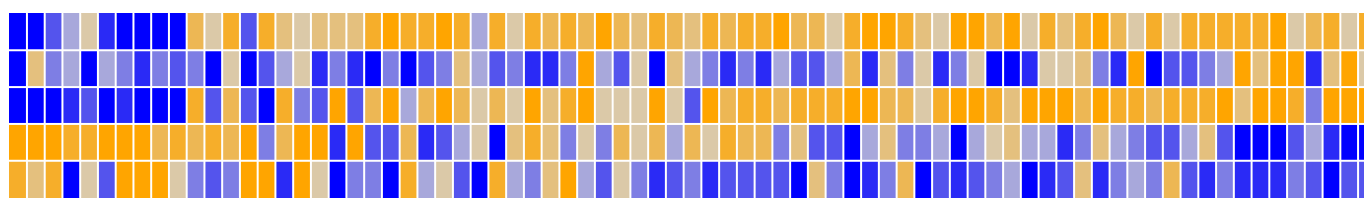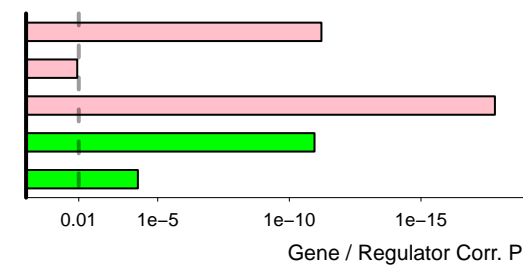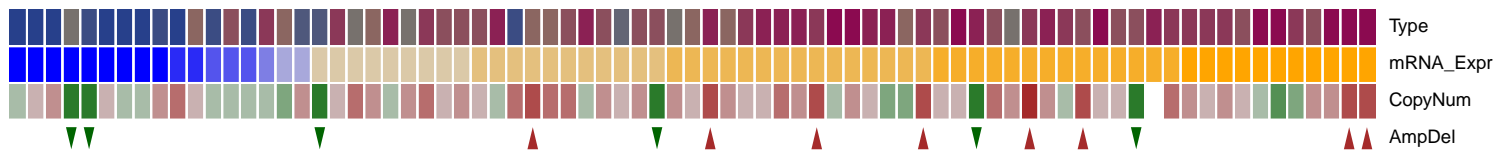

TCGA-FS-A1ZC-06  
 TCGA-D3-A1Q5-06  
 TCGA-LH-A9QB-06  
 TCGA-EE-A20C-06  
 TCGA-EE-A3J8-06  
 TCGA-ER-A42K-06  
 TCGA-EE-A29A-06  
 TCGA-EE-A2GO-06  
 TCGA-EE-A2MM-06  
 TCGA-EE-A20H-06  
 TCGA-FS-A1Z3-06  
 TCGA-WE-A8Z0-06  
 TCGA-FS-A1ZE-06  
 TCGA-WE-A8K6-06  
 TCGA-D3-A3ML-06  
 TCGA-EE-A3I7-06  
 TCGA-WE-A8ZM-06  
 TCGA-ER-A19L-06  
 TCGA-FS-A4FU-06  
 TCGA-D3-A3C6-06  
 TCGA-ER-A3ES-06  
 TCGA-D3-A8GC-06  
 TCGA-EE-A3JI-06  
 TCGA-RP-A690-06  
 TCGA-D9-A1X3-06  
 TCGA-D3-A8GV-06  
 TCGA-EE-A29E-06  
 TCGA-D3-A3MO-06  
 TCGA-FS-A1YW-06  
 TCGA-WE-A8JZ-06  
 TCGA-D3-A1Q1-06  
 TCGA-FS-A1ZY-06  
 TCGA-YG-AA3P-06  
 TCGA-EE-A2A5-06  
 TCGA-FS-A1ZU-06  
 TCGA-EE-A3AH-06  
 TCGA-FS-A4F5-06  
 TCGA-GN-A268-06  
 TCGA-FS-A4FB-06  
 TCGA-EE-A29D-06  
 TCGA-FS-A1ZZ-06  
 TCGA-EE-A2GR-06  
 TCGA-GN-A262-06  
 TCGA-D3-A1QA-06  
 TCGA-EE-A29L-06  
 TCGA-D9-A6FG-06  
 TCGA-EE-A380-06  
 TCGA-D9-A6EC-06  
 TCGA-D3-A6EP-06  
 TCGA-DA-A35W-06  
 TCGA-FS-A1ZG-06  
 TCGA-D9-A4Z6-06  
 TCGA-W3-A8Z4-06  
 TCGA-FW-A3I3-06  
 TCGA-W3-AA21-06  
 TCGA-EE-A3AD-06  
 TCGA-EE-A29B-06  
 TCGA-ER-A19F-06  
 TCGA-D3-A8GL-06  
 TCGA-FR-A7U8-06  
 TCGA-D3-A8GI-06  
 TCGA-D3-A1QA-07  
 TCGA-3N-A9WB-06  
 TCGA-FS-A1ZK-06  
 TCGA-D3-A5GL-06  
 TCGA-RP-A695-06  
 TCGA-EE-A17Z-06  
 TCGA-GN-A4U7-06  
 TCGA-GN-A8LL-06  
 TCGA-FR-A8YD-06  
 TCGA-DA-A95Z-06  
 TCGA-GN-A8LK-06  
 TCGA-DA-A1IA-06  
 TCGA-EE-A185-06

# MCF2L

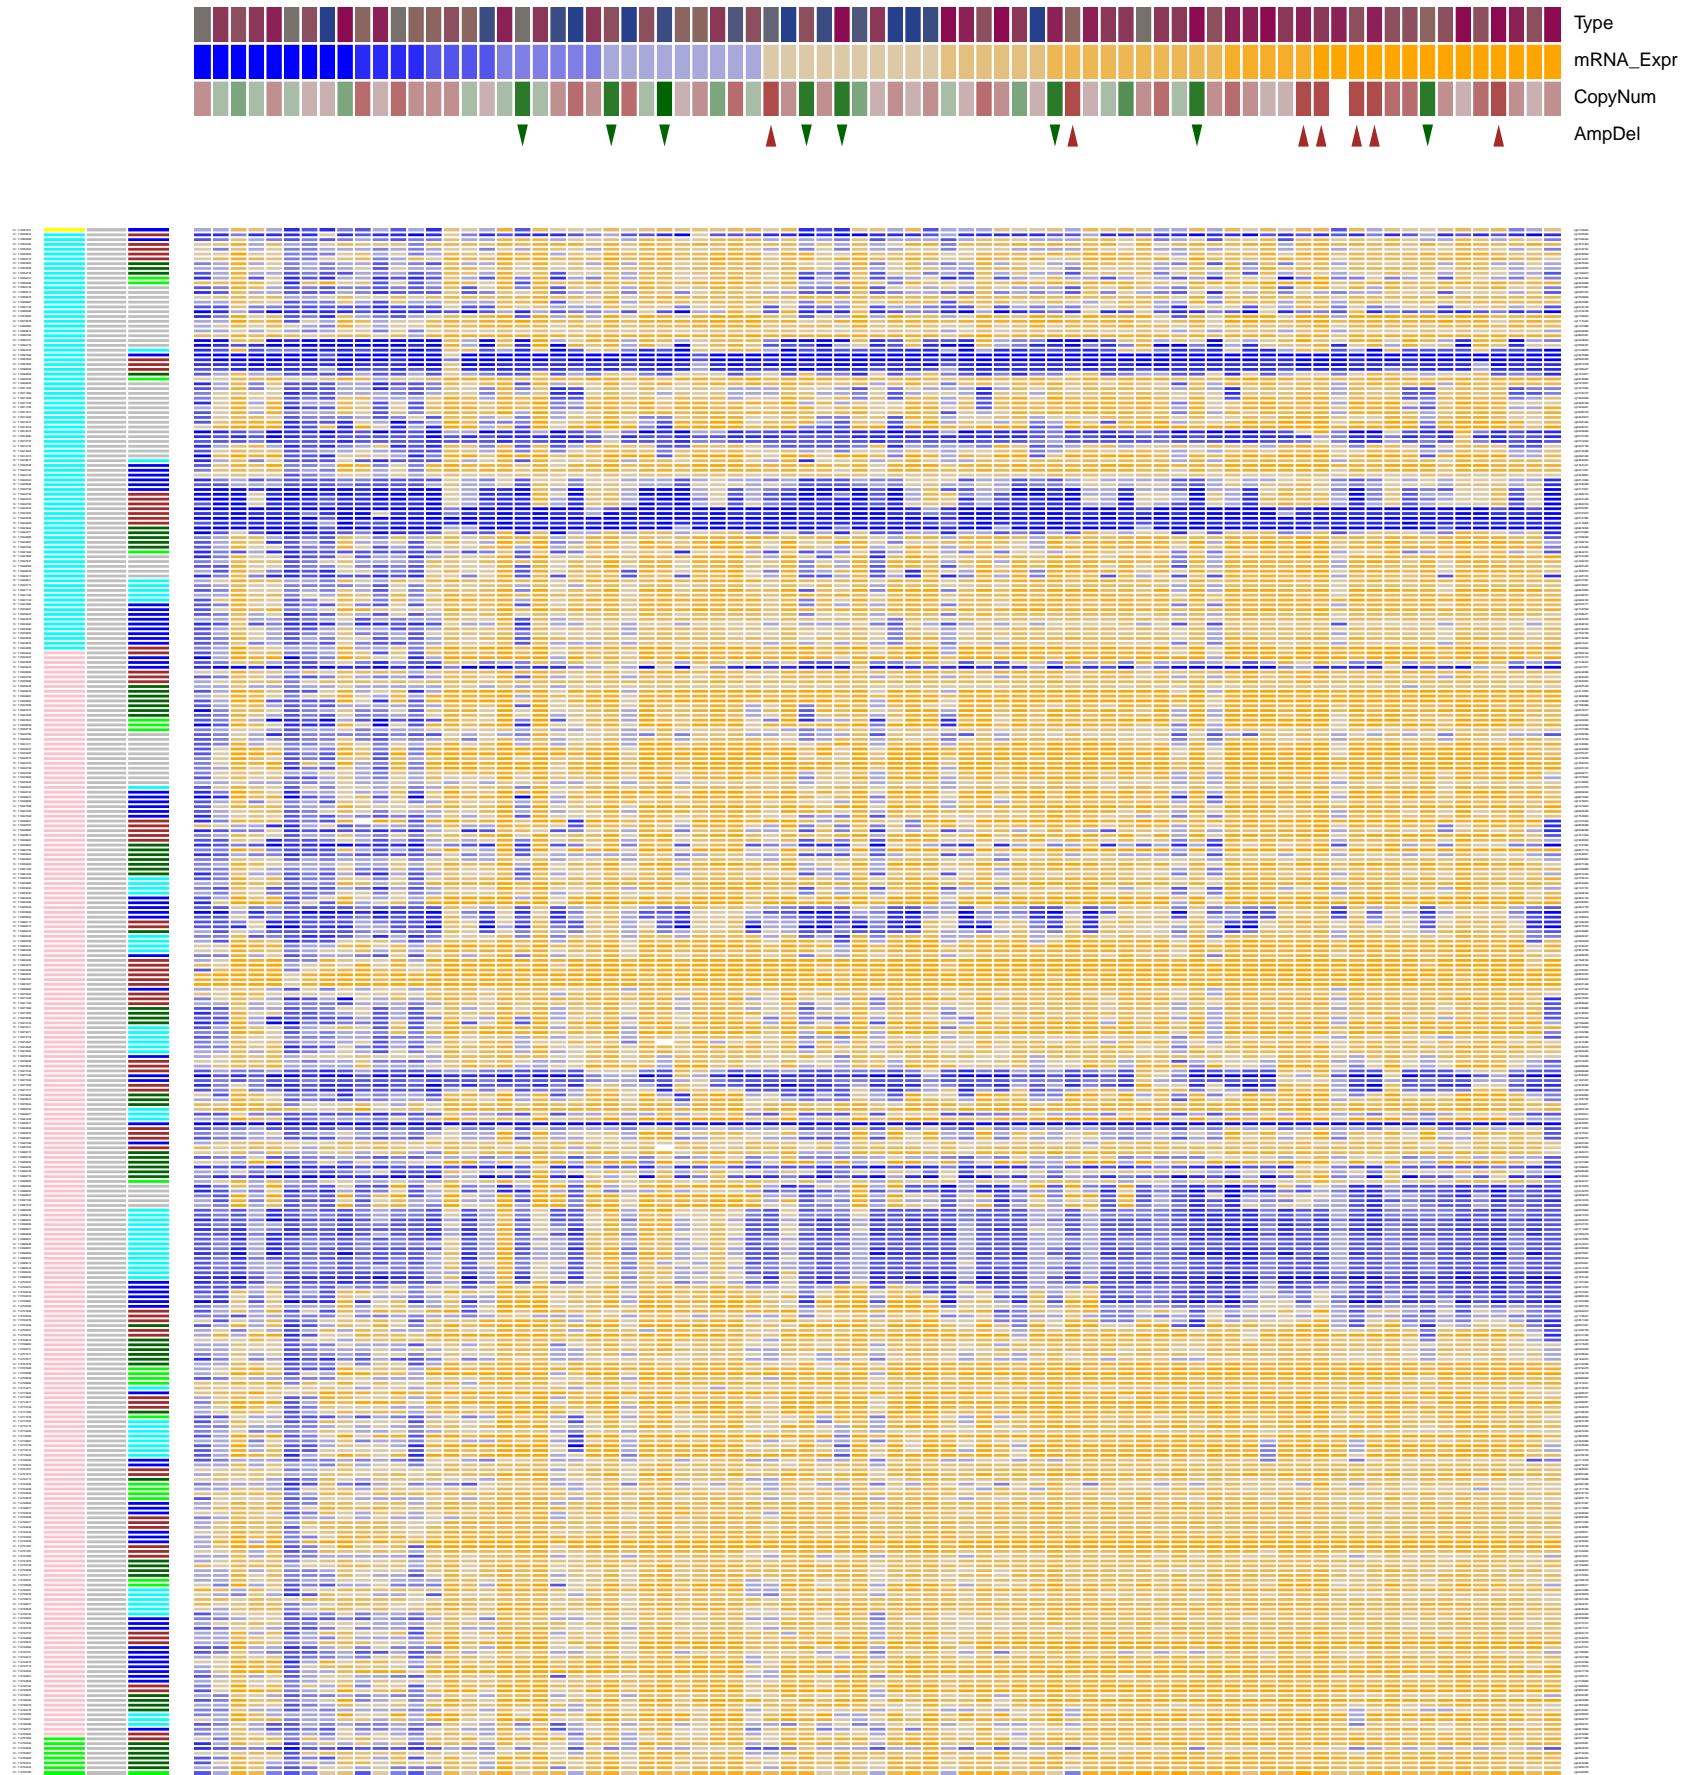

GeneLoc  
PromoterAssoc  
CpGIsland

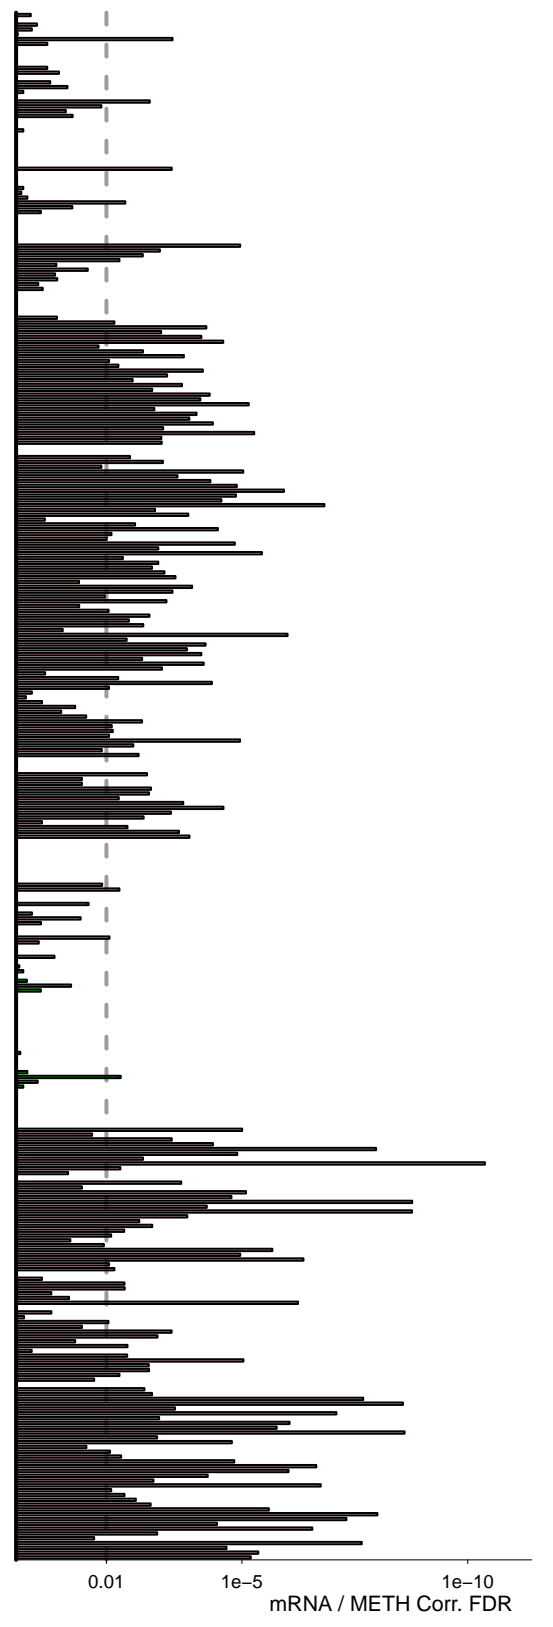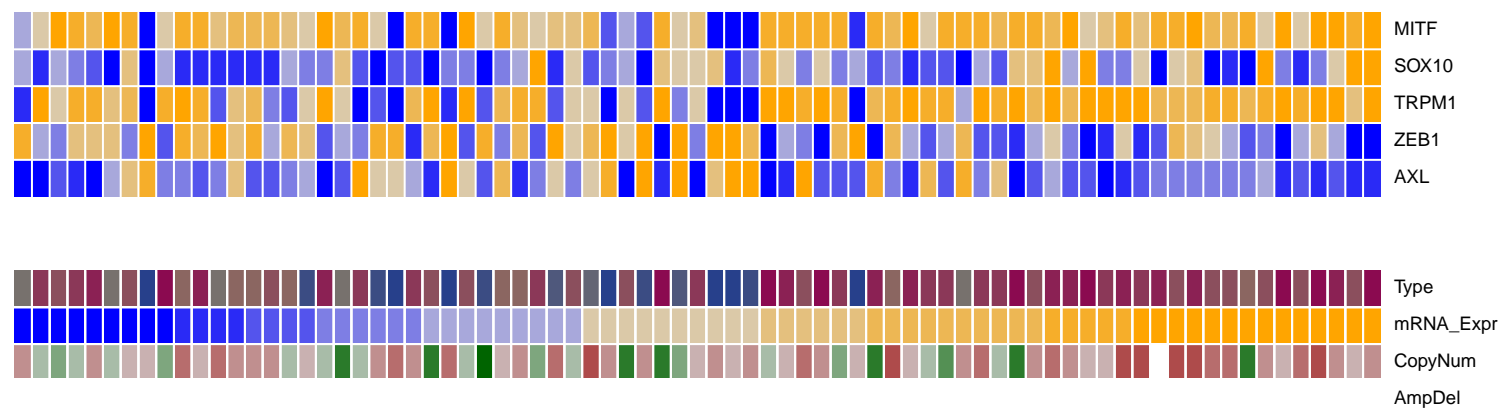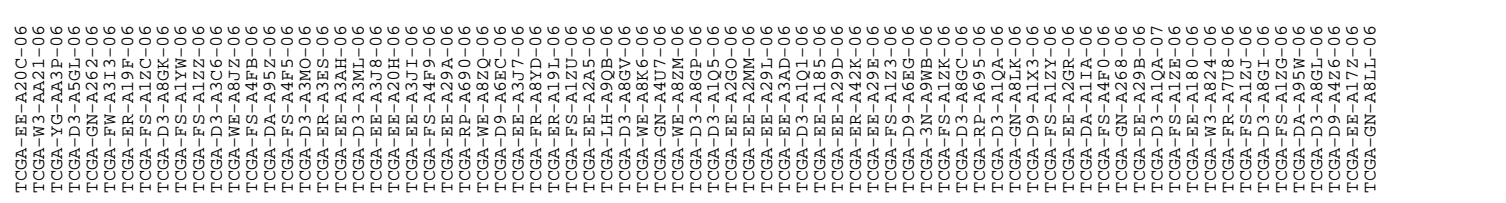

TCGA-EE-A20C-06  
TCGA-W3-AA21-06  
TCGA-YG-AA3P-06  
TCGA-D3-A5GL-06  
TCGA-GN-A262-06  
TCGA-FW-A313-06  
TCGA-ER-A19F-06  
TCGA-FS-A1ZC-06  
TCGA-D3-A8GK-06  
TCGA-FS-A1YW-06  
TCGA-D3-A3C6-06  
TCGA-WE-A8VZ-06  
TCGA-PS-A4FB-06  
TCGA-DA-A95Z-06  
TCGA-FS-A4FE-06  
TCGA-D3-A3WO-06  
TCGA-ER-A3FS-06  
TCGA-EE-A3AH-06  
TCGA-D3-A3MJ-06  
TCGA-EE-A3O8-06  
TCGA-EE-A20H-06  
TCGA-EE-A3JI-06  
TCGA-FS-A4F9-06  
TCGA-EE-A29A-06  
TCGA-RP-A690-06  
TCGA-WE-A8ZQ-06  
TCGA-D9-A6EC-06  
TCGA-EE-A3J7-06  
TCGA-FR-A8YD-06  
TCGA-ER-A19L-06  
TCGA-FS-A1ZU-06  
TCGA-EE-A2A5-06  
TCGA-LH-A9QB-06  
TCGA-D3-A8GV-06  
TCGA-WE-A8K6-06  
TCGA-GN-A4U7-06  
TCGA-WE-A8ZM-06  
TCGA-D3-A8GP-06  
TCGA-D3-A1O5-06  
TCGA-EE-A2G0-06  
TCGA-EE-A2MM-06  
TCGA-EE-A29I-06  
TCGA-EE-A3AD-06  
TCGA-D3-A1O1-06  
TCGA-EE-A185-06  
TCGA-EE-A29D-06  
TCGA-ER-A42K-06  
TCGA-EE-A29F-06  
TCGA-FS-A1Z2-06  
TCGA-D9-A5EG-06  
TCGA-3N-A9WB-06  
TCGA-FS-A1ZK-06  
TCGA-D3-A8GC-06  
TCGA-RP-A695-06  
TCGA-D3-A1QA-06  
TCGA-D9-A1X3-06  
TCGA-FS-A1ZY-06  
TCGA-EE-A2GR-06  
TCGA-DA-A1IA-06  
TCGA-FS-A4F0-06  
TCGA-GN-A268-06  
TCGA-EE-A29B-06  
TCGA-D3-A1QA-07  
TCGA-FS-A1ZE-06  
TCGA-EE-A180-06  
TCGA-W3-A824-06  
TCGA-FR-A7U8-06  
TCGA-FS-A1ZJ-06  
TCGA-D3-A8GI-06  
TCGA-FS-A1ZG-06  
TCGA-DA-A95W-06  
TCGA-D3-A8GL-06  
TCGA-D9-A4Z6-06  
TCGA-EE-A17Z-06  
TCGA-GN-A8LL-06

# CA14

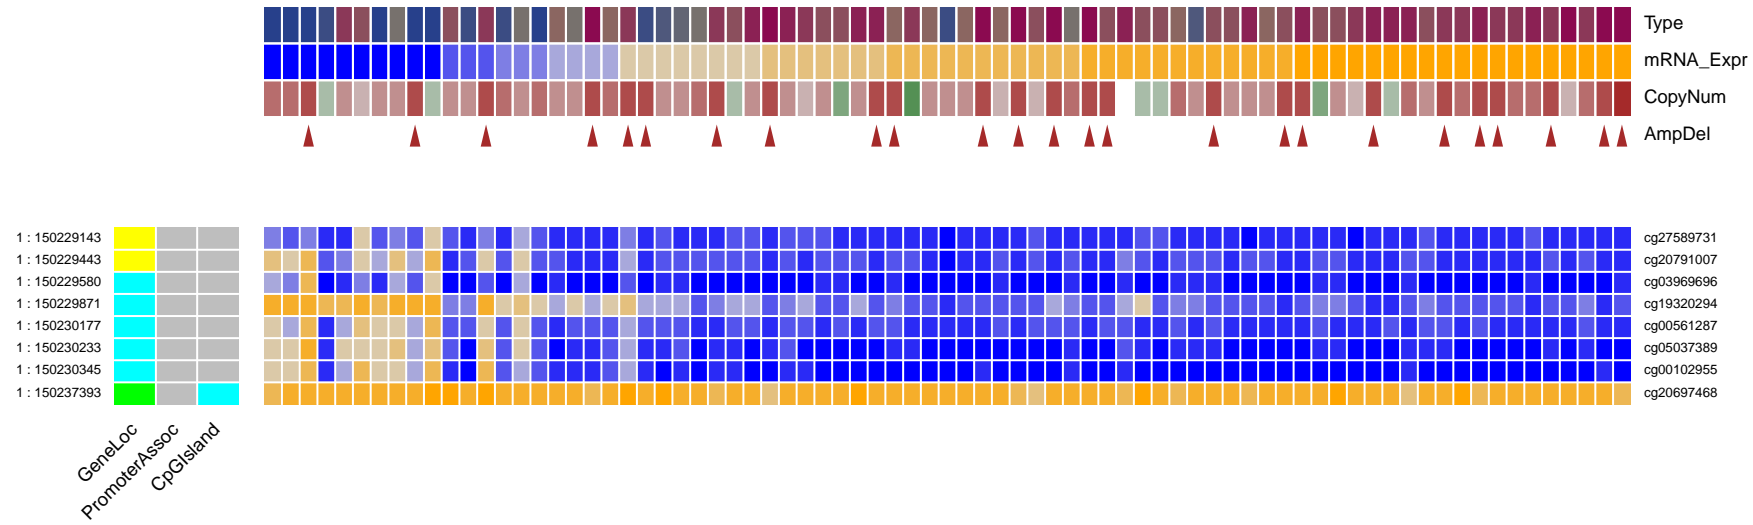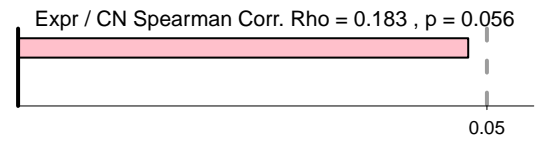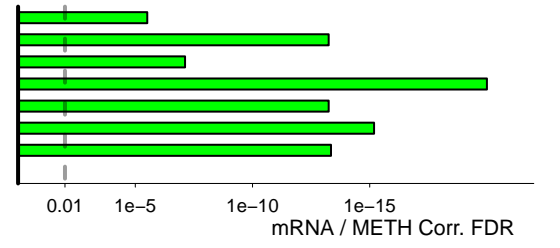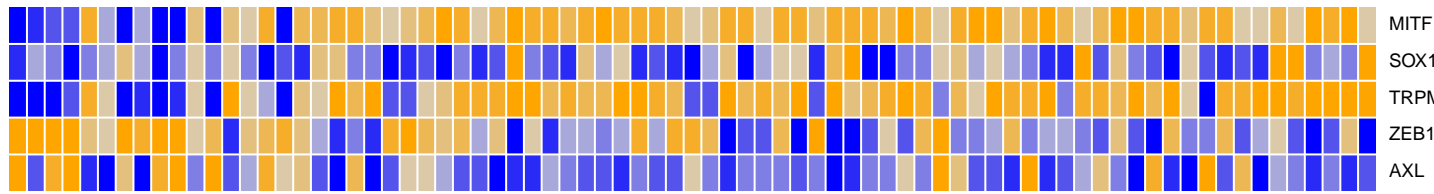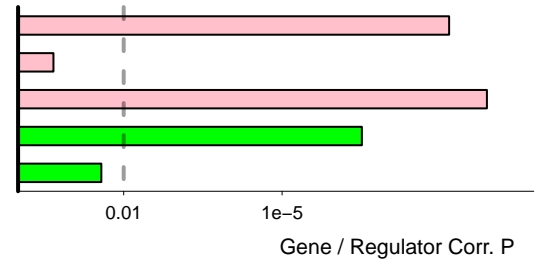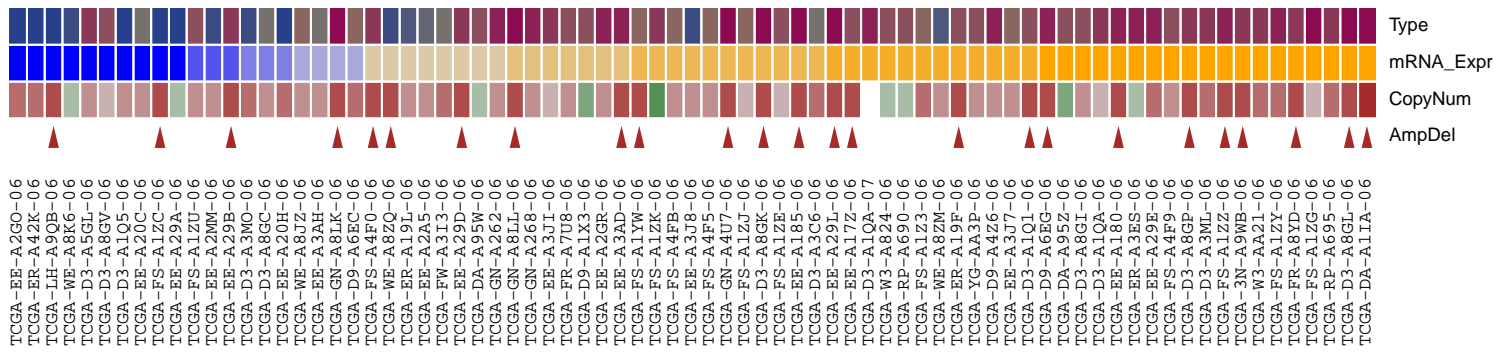

# TRIM2

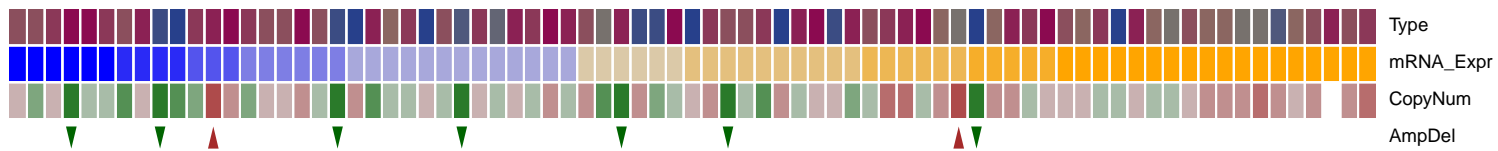

Expr / CN Spearman Corr. Rho = 0.405 , p = 0.00016

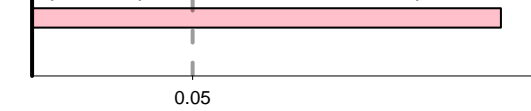

4 : 154072288  
4 : 154073371  
4 : 154073480  
4 : 154073501  
4 : 154073616  
4 : 154073709  
4 : 154073813  
4 : 154073915  
4 : 154074021  
4 : 154074121  
4 : 154074124  
4 : 154074127  
4 : 154074145  
4 : 154074155  
4 : 154074259  
4 : 154074387  
4 : 154074737  
4 : 154075044  
4 : 154075471  
4 : 154076820  
4 : 154077609  
4 : 154092267  
4 : 154112549  
4 : 154124584  
4 : 154125208  
4 : 154125374  
4 : 154125453  
4 : 154125535  
4 : 154125594  
4 : 154125637  
4 : 154125681  
4 : 154125720  
4 : 154126481  
4 : 154142712  
4 : 154143694  
4 : 154143948  
4 : 154144286  
4 : 154144462  
4 : 154144800  
4 : 154155288  
4 : 154162990  
4 : 154169814  
4 : 154170410  
4 : 154170538  
4 : 154170590  
4 : 154170684  
4 : 154170783  
4 : 154170822  
4 : 154178277  
4 : 154179401  
4 : 154216535  
4 : 154216637  
4 : 154216765  
4 : 154216917  
4 : 154217026  
4 : 154217214  
4 : 154218350  
4 : 154229091  
4 : 154231075  
4 : 154256138

GeneLoc  
PromoterAssoc  
CpIsland

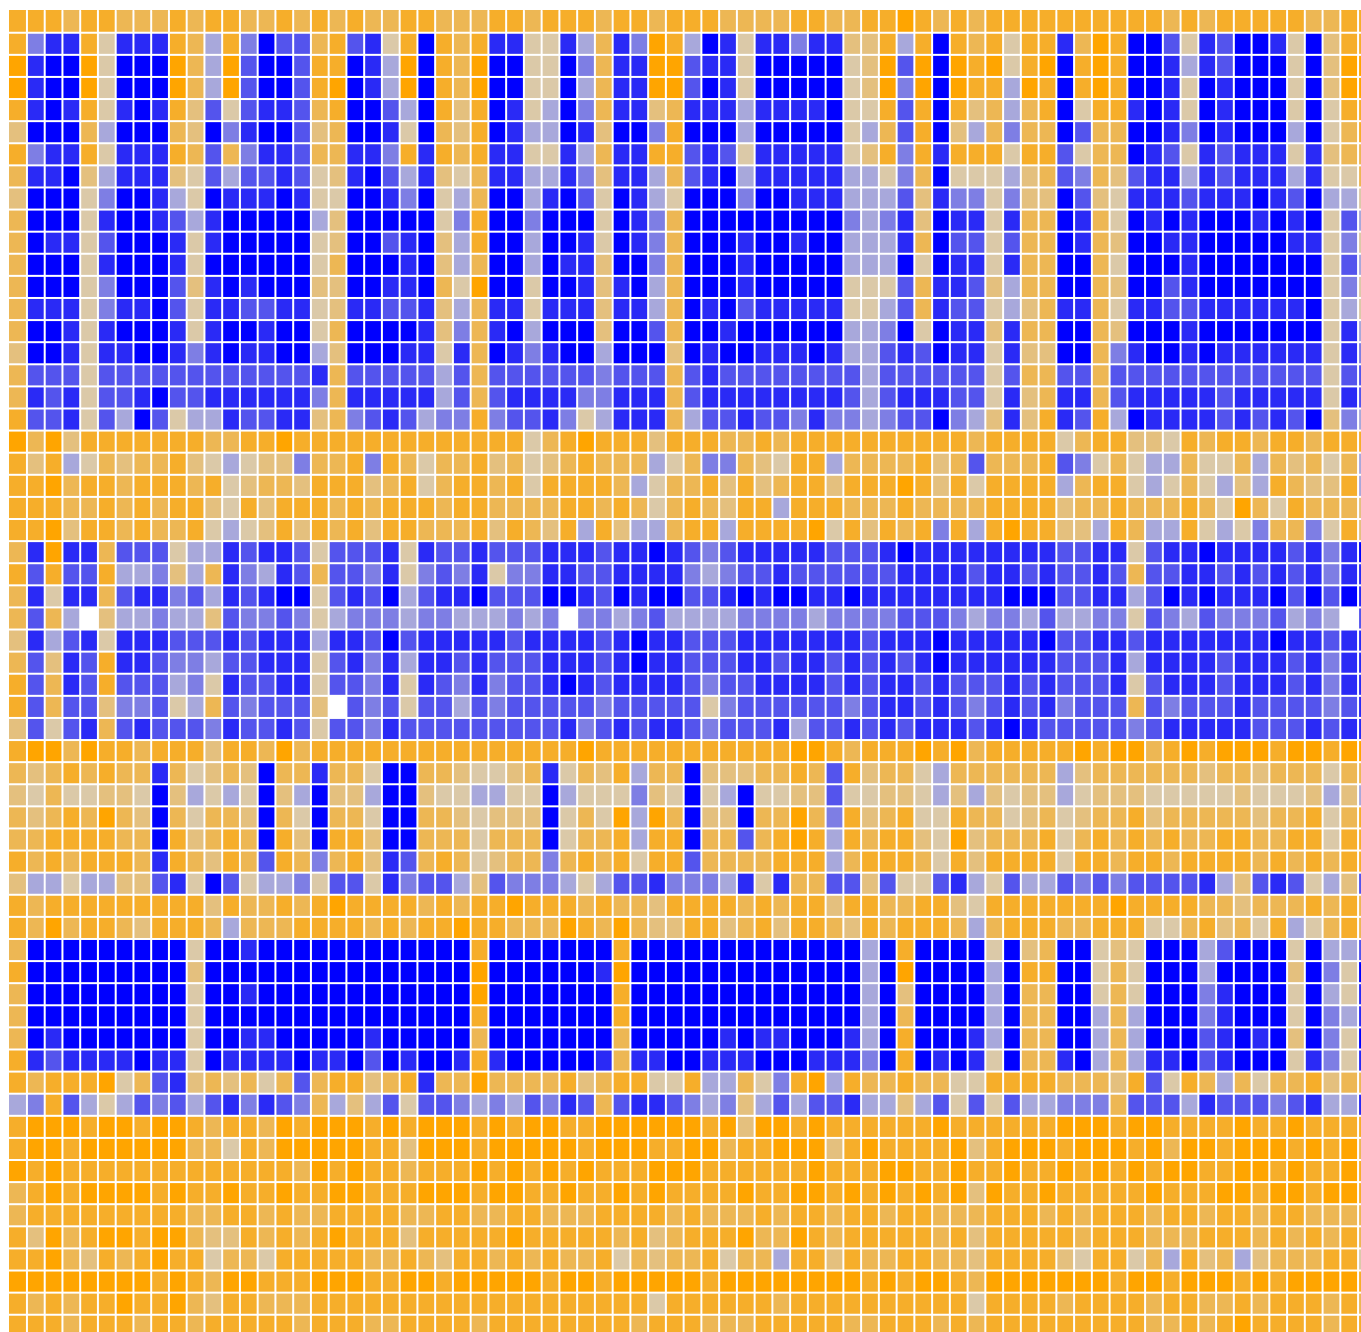

cg03808580  
cg01894064  
cg01022974  
cg00349895  
cg00381131  
cg22709082  
cg14001992  
cg23858532  
cg03506944  
cg04507768  
cg27442931  
cg03854543  
cg02006288  
cg24449495  
cg26806071  
cg16525575  
cg02931753  
cg06306219  
cg25922624  
cg22811638  
cg01597882  
cg26464701  
cg25173574  
cg18367268  
cg16708623  
cg17943647  
cg22471112  
cg17371020  
cg23820816  
cg12793610  
cg02616418  
cg17852507  
cg02832697  
cg05870820  
cg12453905  
cg02881158  
cg13899188  
cg24510494  
cg15410675  
cg18566555  
cg26396039  
cg20926021  
cg19717235  
cg22905274  
cg07318284  
cg22127901  
cg05795596  
cg22359388  
cg05973772  
cg20818457  
cg08555594  
cg16814143  
cg04629914  
cg22280771  
cg19830260  
cg11652691  
cg01942226  
cg17318769  
cg04661810  
cg03724962

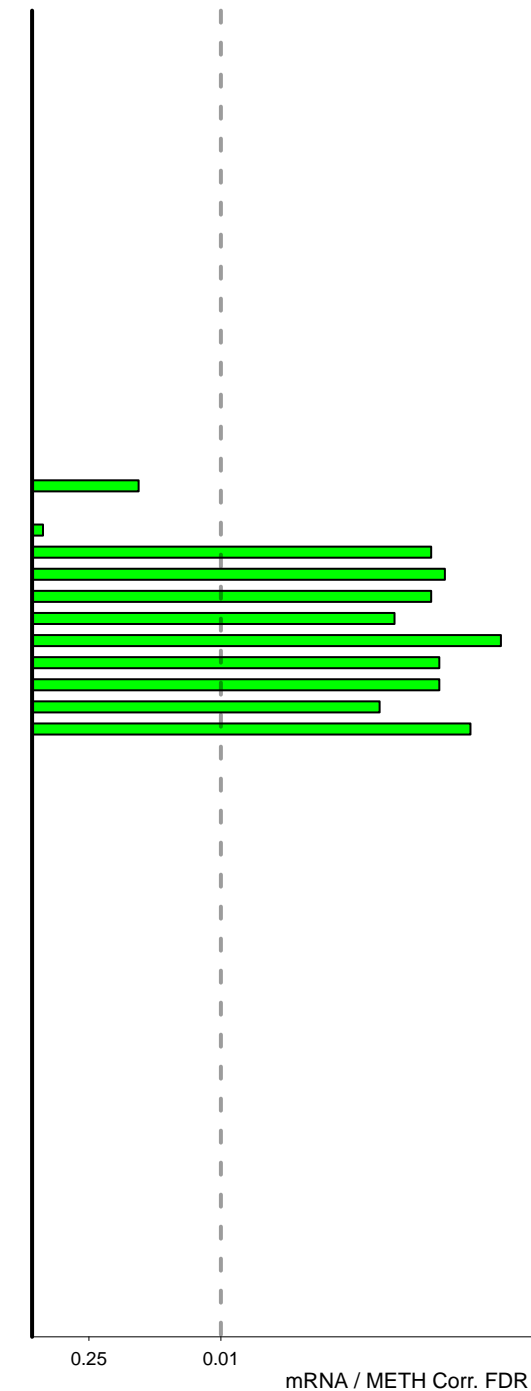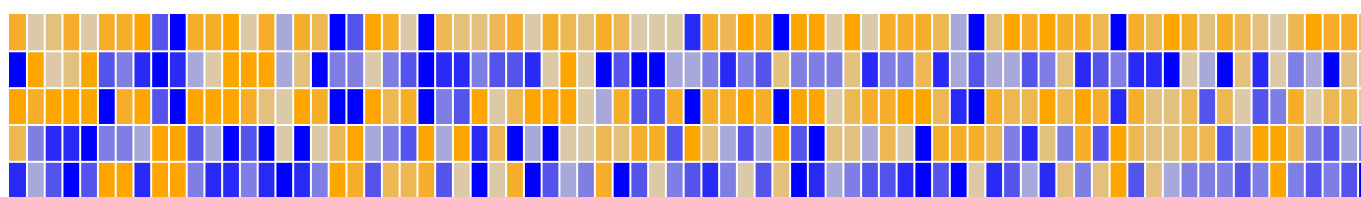

MITF  
SOX10  
TRPM1  
ZEB1  
AXL

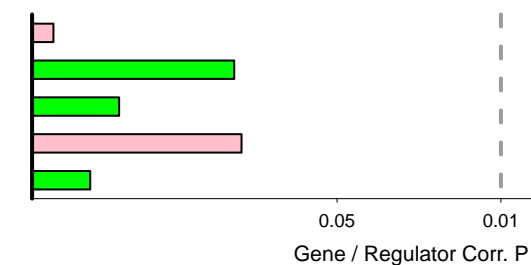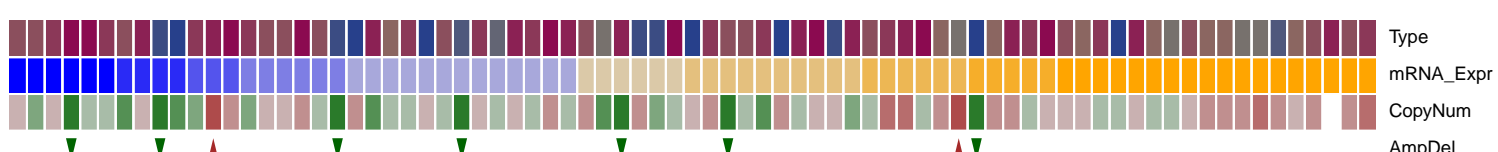

TCGA-FS-A4F9-06  
TCGA-D3-A8G1-06  
TCGA-EE-A29B-06  
TCGA-GN-A8LK-06  
TCGA-DA-A1IA-06  
TCGA-D3-A3ML-06  
TCGA-D9-A65G-06  
TCGA-WE-A8K6-06  
TCGA-EE-A2G0-06  
TCGA-EP-A695-06  
TCGA-EE-A3AD-06  
TCGA-GN-A8LL-06  
TCGA-PR-A8YD-06  
TCGA-EE-A17Z-06  
TCGA-D3-A8GY-06  
TCGA-GN-A4U7-06  
TCGA-W3-A8A4-06  
TCGA-EE-A2M4-06  
TCGA-LH-A90P-06  
TCGA-D9-A4Z6-06  
TCGA-D9-A65C-06  
TCGA-3N-A9WB-06  
TCGA-FS-A1ZC-06  
TCGA-DA-A9SZ-06  
TCGA-ER-A19L-06  
TCGA-FS-A4F0-06  
TCGA-EE-A2A5-06  
TCGA-EE-A29F-06  
TCGA-W3-AA21-06  
TCGA-EE-A185-06  
TCGA-FS-A1ZY-06  
TCGA-FS-A1ZU-06  
TCGA-D3-A8GC-06  
TCGA-GN-A262-06  
TCGA-WE-A8ZQ-06  
TCGA-EE-A3J8-06  
TCGA-D3-A8GK-06  
TCGA-ER-A42K-06  
TCGA-D3-A5GL-06  
TCGA-PR-A7U8-06  
TCGA-RP-A690-06  
TCGA-FS-A1ZK-06  
TCGA-D3-A1O5-06  
TCGA-ER-A3FS-06  
TCGA-FS-A1ZG-06  
TCGA-D3-A3W0-06  
TCGA-EE-A180-06  
TCGA-DA-A95W-06  
TCGA-EE-A29D-06  
TCGA-GN-A288-06  
TCGA-EE-A25J-06  
TCGA-FS-A4FB-06  
TCGA-EE-A20C-06  
TCGA-EE-A20H-06  
TCGA-EE-A3J7-06  
TCGA-EE-A2GR-06  
TCGA-EE-A3JI-06  
TCGA-ER-A19F-06  
TCGA-D3-A8GL-06  
TCGA-FS-A1YW-06  
TCGA-EE-A29A-06  
TCGA-FS-A1Z2-06  
TCGA-FS-A1Z2-06  
TCGA-FW-A3I3-06  
TCGA-FS-A1ZE-06  
TCGA-FS-A4F5-06  
TCGA-EE-A3AH-06  
TCGA-D3-A3C6-06  
TCGA-WE-A8ZM-06  
TCGA-FS-A1Z3-06  
TCGA-YG-AA3P-06  
TCGA-D3-A1QA-07  
TCGA-D9-A1X3-06  
TCGA-D3-A8GP-06

# APOLD1

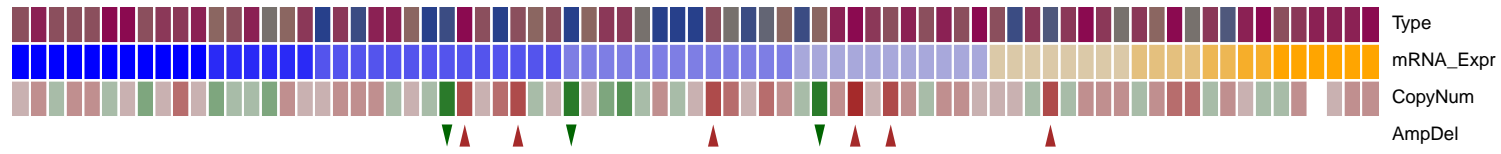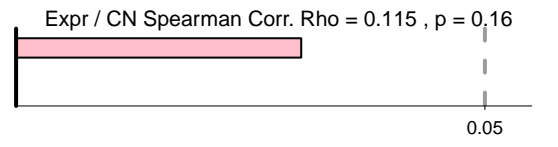

12:12876945  
12:12877474  
12:12877503  
12:12877729  
12:12878211  
12:12878379  
12:12878428  
12:12878440  
12:12878752  
12:12878755  
12:12878779  
12:12878810  
12:12878865  
12:12878887  
12:12879764  
12:12887740  
12:12901747  
12:12917582  
12:12937632  
12:12938082  
12:12938287  
12:12938383  
12:12938397  
12:12938425  
12:12939519  
12:12939714  
12:12939751  
12:12940139  
12:12940390  
12:12940610  
12:12943861  
12:12966005  
12:12966031  
12:12966124  
12:12966224  
12:12966231  
12:12966271  
12:12966285  
12:12966464  
12:12982506

GeneLoc  
PromoterAssoc  
CpIsland

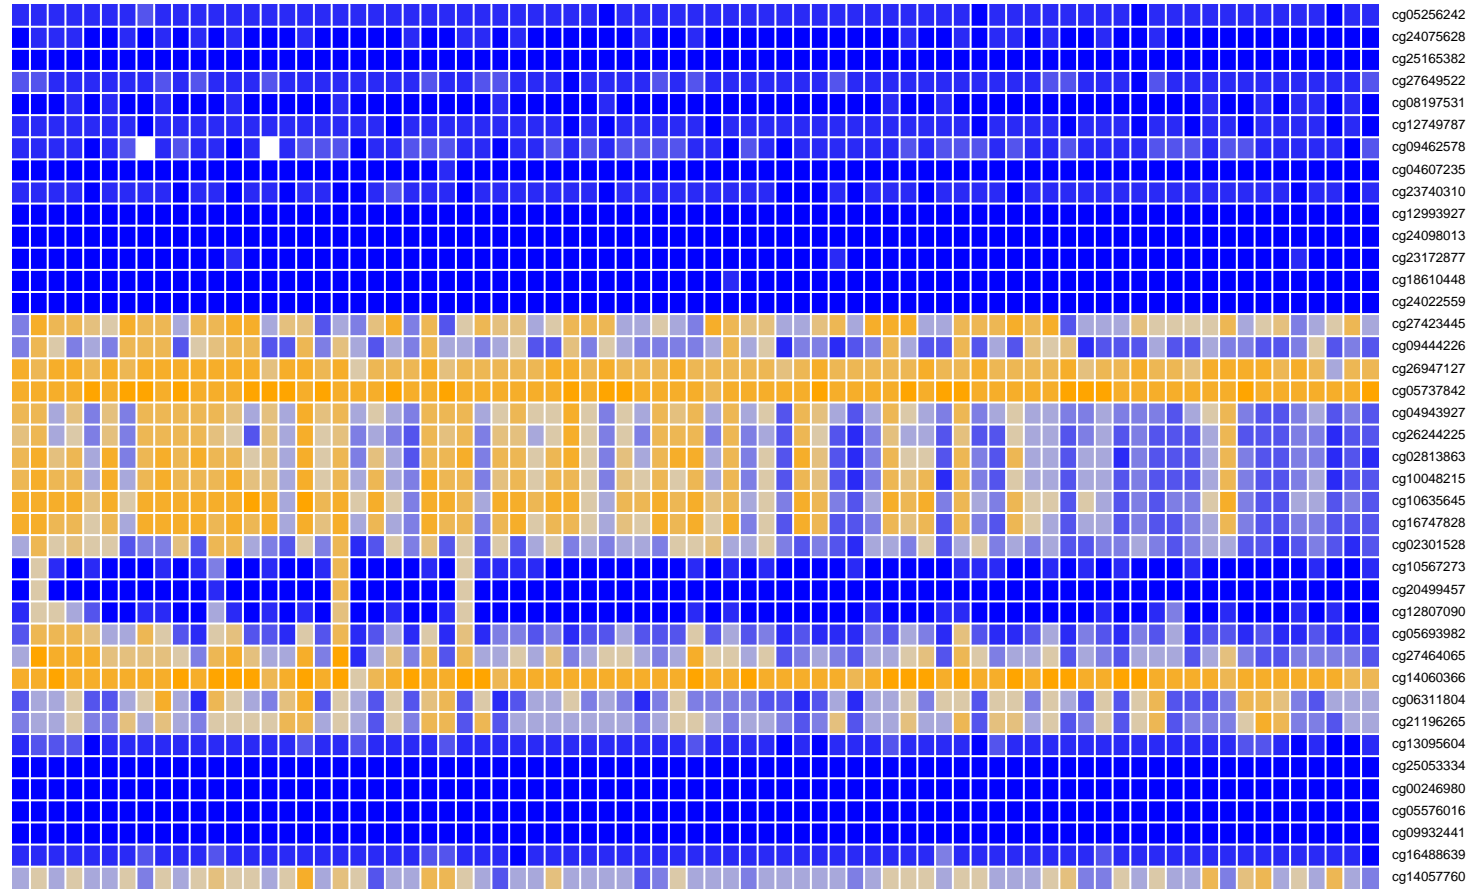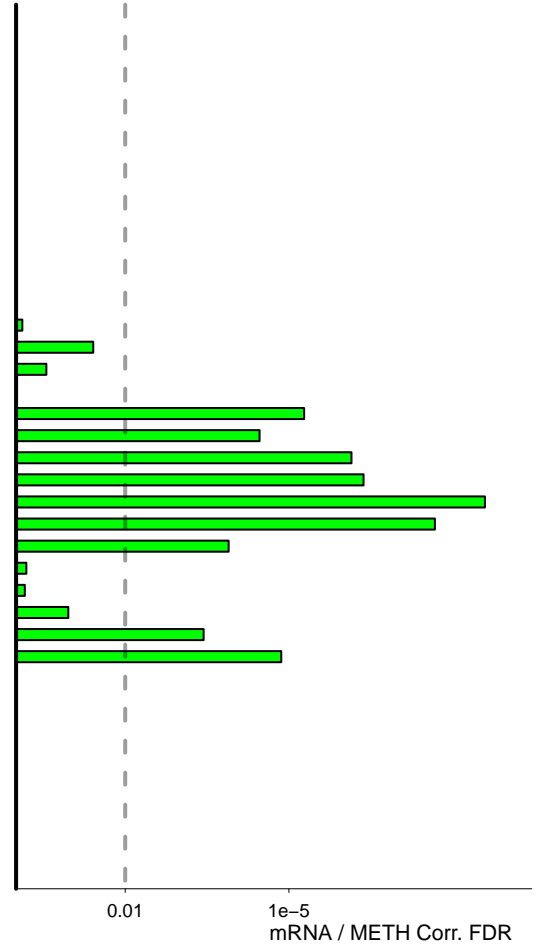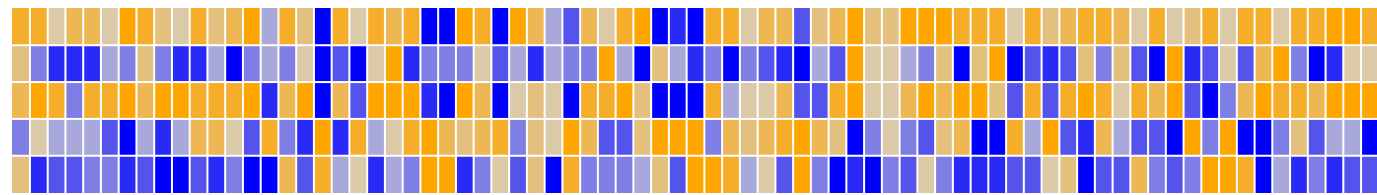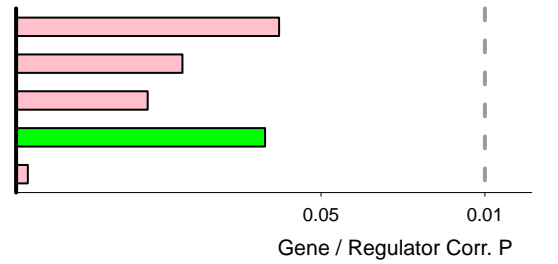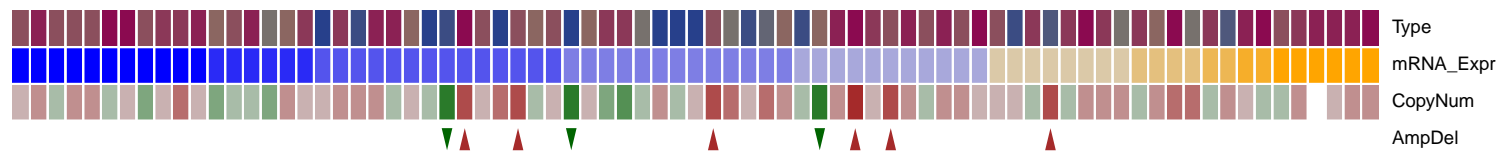

TCGA-ER-A19F-06  
TCGA-GN-A268-06  
TCGA-DA-A95W-06  
TCGA-DA-A95Z-06  
TCGA-FR-A7U8-06  
TCGA-D3-A8GK-06  
TCGA-FS-A1ZG-06  
TCGA-D9-A1X3-06  
TCGA-FS-A4F0-06  
TCGA-W3-AA21-06  
TCGA-FS-A1Z2-06  
TCGA-FE-A3J7-06  
TCGA-W3-A824-06  
TCGA-FR-A3FS-06  
TCGA-FE-A20C-06  
TCGA-D9-A6BC-06  
TCGA-FE-A29B-06  
TCGA-FS-A1ZC-06  
TCGA-FE-A3J1-06  
TCGA-FE-A3J8-06  
TCGA-FE-A3AD-06  
TCGA-FS-A1ZY-06  
TCGA-FS-A1YW-06  
TCGA-FE-A29A-06  
TCGA-EE-A2MM-06  
TCGA-D3-A8GL-06  
TCGA-FS-A1ZE-06  
TCGA-FE-A20H-06  
TCGA-YG-AA3P-06  
TCGA-FE-A8JZ-06  
TCGA-D3-A8GV-06  
TCGA-LH-A9QB-06  
TCGA-FS-A1Z3-06  
TCGA-FR-A8YD-06  
TCGA-RP-A695-06  
TCGA-FW-A3I3-06  
TCGA-D3-A1Q5-06  
TCGA-ER-A42K-06  
TCGA-FE-A2GO-06  
TCGA-D3-A1Q1-06  
TCGA-D3-A8GC-06  
TCGA-EE-A2A5-06  
TCGA-FS-A4FB-06  
TCGA-FE-A8K6-06  
TCGA-FS-A4F5-06  
TCGA-GN-A262-06  
TCGA-GN-A8Y1-06  
TCGA-D3-A8GP-06  
TCGA-FS-A1Z1-06  
TCGA-FE-A2GR-06  
TCGA-FE-A690-06  
TCGA-FE-A1S0-06  
TCGA-FS-A4F9-06  
TCGA-GN-A4U7-06  
TCGA-FE-A1Z7-06  
TCGA-FE-A8ZQ-06  
TCGA-FS-A1ZK-06  
TCGA-ER-A19L-06  
TCGA-D3-A1QA-06  
TCGA-GN-A8LK-06  
TCGA-FE-A29D-06  
TCGA-FE-A3AH-06  
TCGA-3N-A9WB-06  
TCGA-FS-A1ZJ-06  
TCGA-DA-A1IA-06  
TCGA-D3-A3C6-06  
TCGA-D3-A3ML-06  
TCGA-FE-A8ZM-06  
TCGA-EE-A29E-06  
TCGA-EE-A29L-06  
TCGA-D3-A8G1-06  
TCGA-D3-A5GL-06  
TCGA-D3-A1QA-07  
TCGA-D9-A65G-06  
TCGA-D9-A4Z6-06  
TCGA-FE-A185-06



# ITGA9

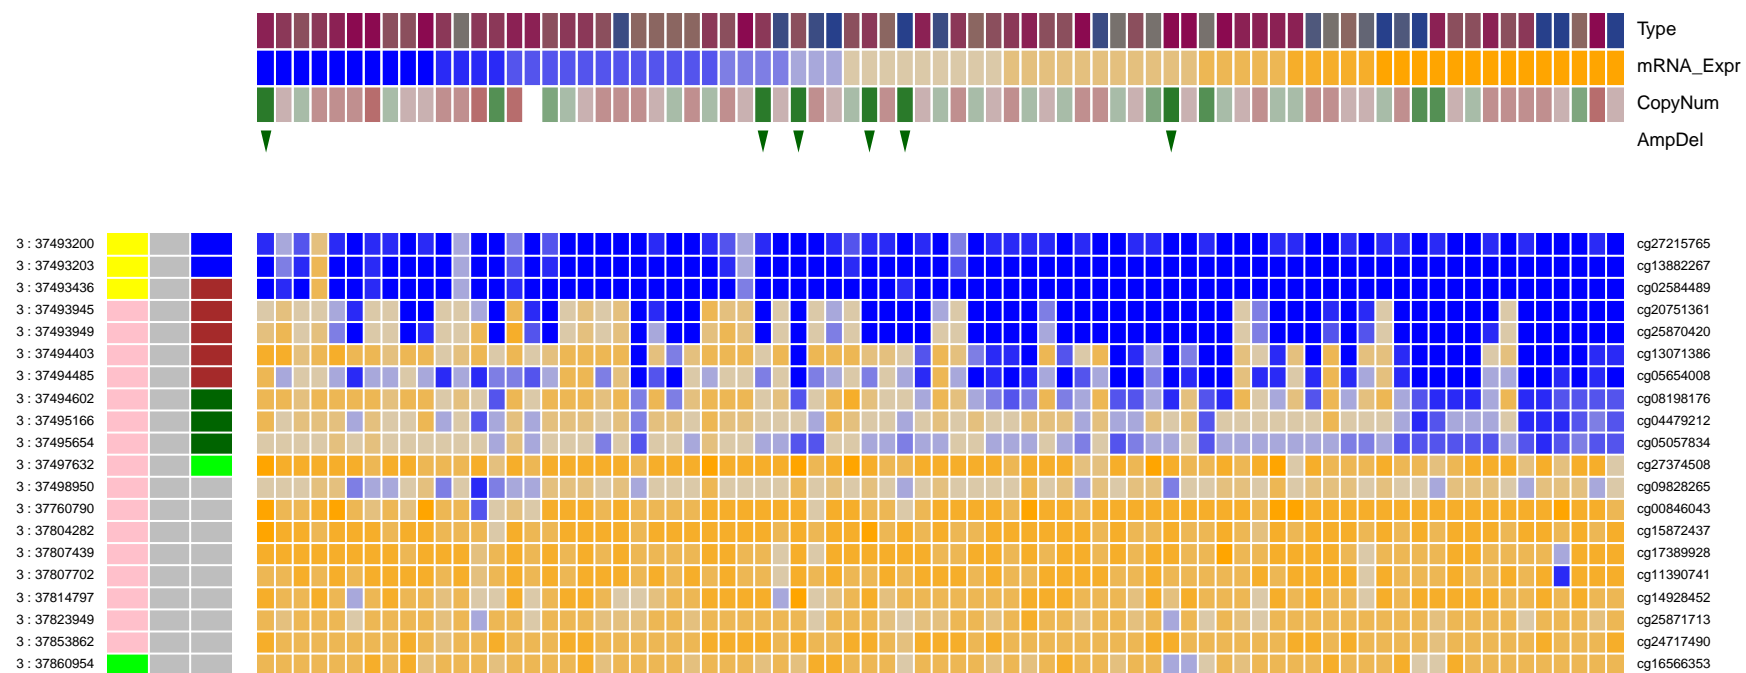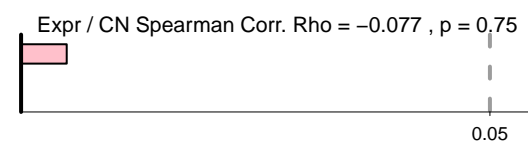

GeneLoc  
PromoterAssoc  
CpGIsland

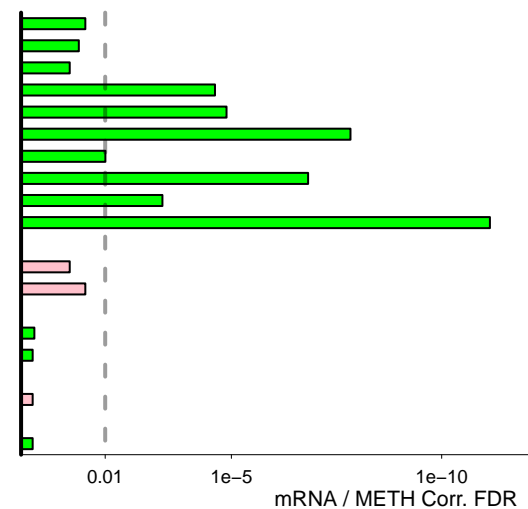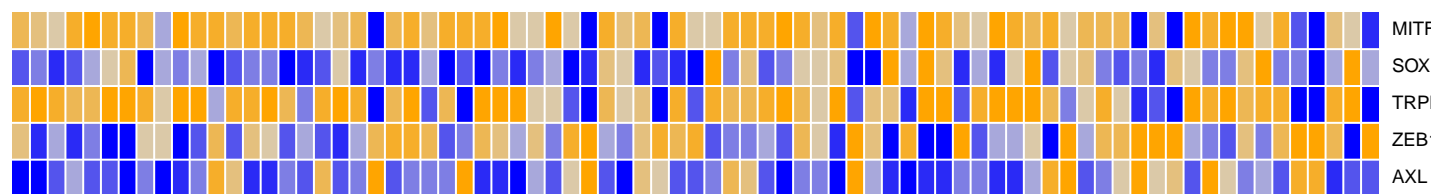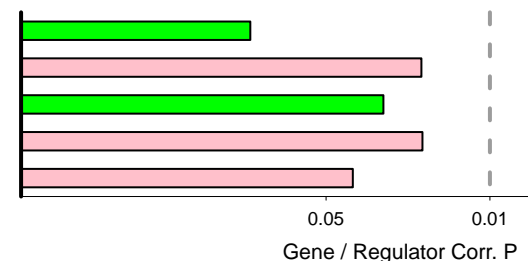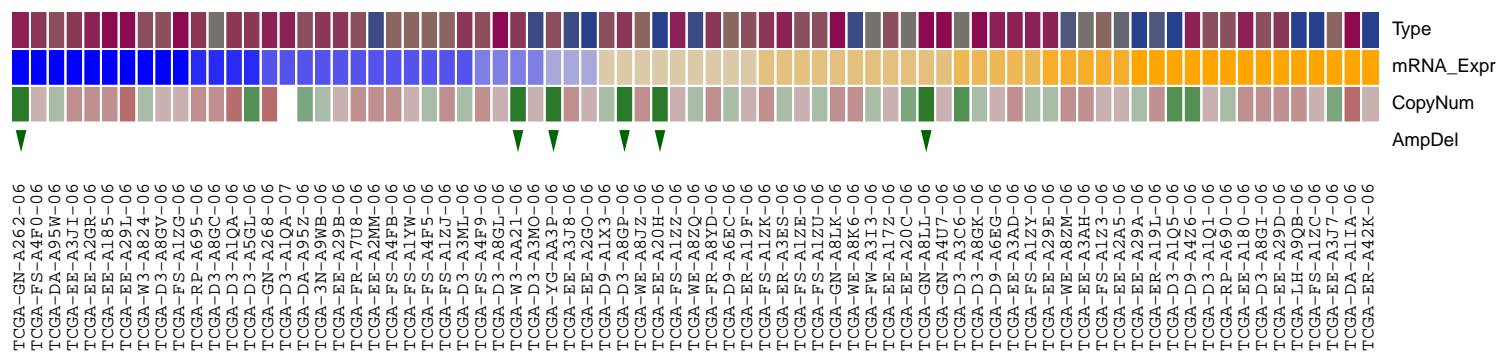

TCGA-GN-A262-06  
TCGA-FS-A4F0-06  
TCGA-DA-A95W-06  
TCGA-EE-A3J1-06  
TCGA-EE-A2GR-06  
TCGA-EE-A185-06  
TCGA-EE-A29L-06  
TCGA-W3-A824-06  
TCGA-D3-A8GV-06  
TCGA-FS-A1ZG-06  
TCGA-RP-A695-06  
TCGA-D3-A8GC-06  
TCGA-D3-A1QA-06  
TCGA-D3-A5GL-06  
TCGA-GN-A268-06  
TCGA-D3-A1QA-07  
TCGA-DA-A9E7-06  
TCGA-3N-A9BE-06  
TCGA-EE-A29B-06  
TCGA-FR-A7U8-06  
TCGA-EE-A2MM-06  
TCGA-FS-A4FB-06  
TCGA-FS-A1YW-06  
TCGA-FS-A1ZJ-06  
TCGA-FS-A4F5-06  
TCGA-FS-A3ML-06  
TCGA-FS-A4F9-06  
TCGA-D3-A8GL-06  
TCGA-W3-AA21-06  
TCGA-D3-A3MO-06  
TCGA-YG-AA3P-06  
TCGA-EE-A3J8-06  
TCGA-EE-A2GO-06  
TCGA-D9-A1X3-06  
TCGA-D3-A8GP-06  
TCGA-WE-A8JZ-06  
TCGA-EE-A20H-06  
TCGA-FS-A1ZZ-06  
TCGA-WE-A8ZQ-06  
TCGA-FR-A8YD-06  
TCGA-D9-A6FC-06  
TCGA-ER-A19F-06  
TCGA-FS-A1ZK-06  
TCGA-ER-A3FS-06  
TCGA-FS-A1ZE-06  
TCGA-FS-A1ZU-06  
TCGA-GN-A8LK-06  
TCGA-WE-A8K6-06  
TCGA-FW-A313-06  
TCGA-EE-A17Z-06  
TCGA-EE-A20C-06  
TCGA-GN-A8LL-06  
TCGA-GN-A4U7-06  
TCGA-D3-A3C6-06  
TCGA-D3-A8GK-06  
TCGA-D9-A6EG-06  
TCGA-EE-A3AD-06  
TCGA-FS-A1ZY-06  
TCGA-EE-A29E-06  
TCGA-WE-A8ZM-06  
TCGA-EE-A3AH-06  
TCGA-FS-A1Z3-06  
TCGA-EE-A2A5-06  
TCGA-EE-A29A-06  
TCGA-ER-A19L-06  
TCGA-D3-A1Q5-06  
TCGA-D9-A4Z6-06  
TCGA-D3-A1Q1-06  
TCGA-RP-A690-06  
TCGA-EE-A180-06  
TCGA-D3-A8G1-06  
TCGA-EE-A29D-06  
TCGA-LH-A9OB-06  
TCGA-FS-A1ZC-06  
TCGA-EE-A3J7-06  
TCGA-DA-A1IA-06  
TCGA-ER-A42K-06

# CHCHD10

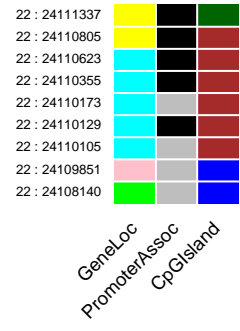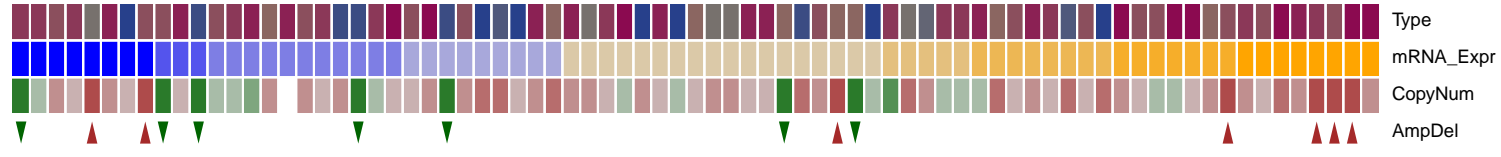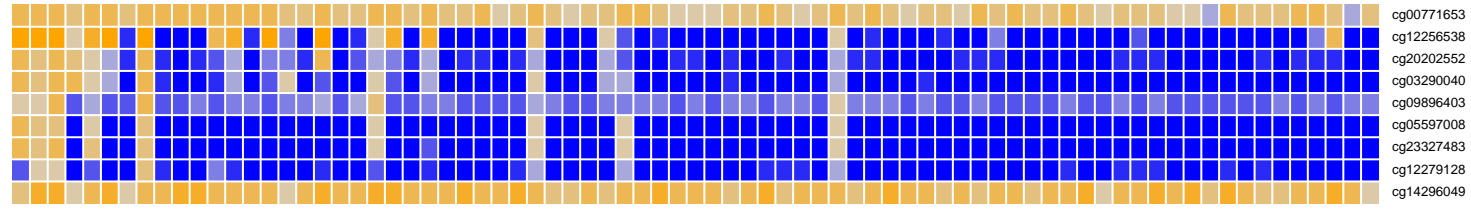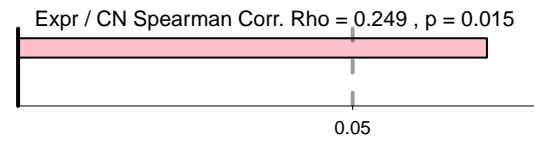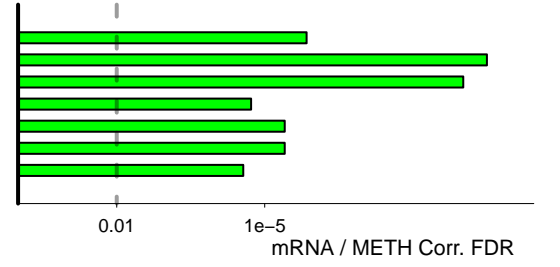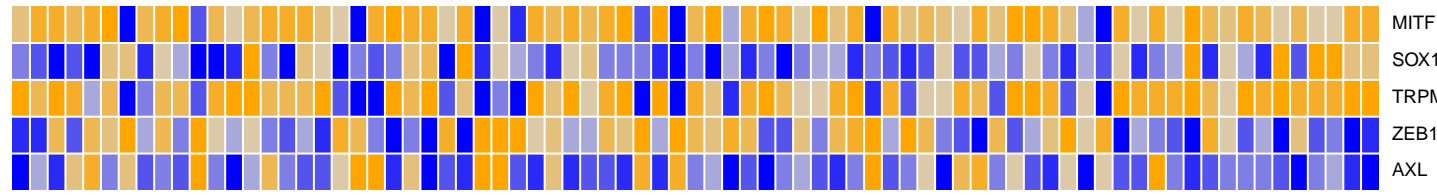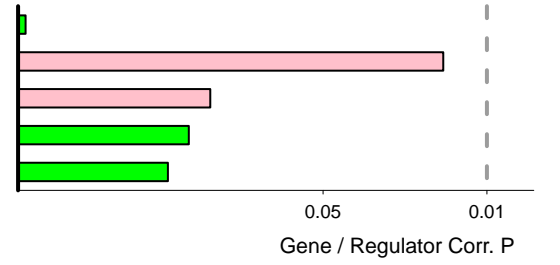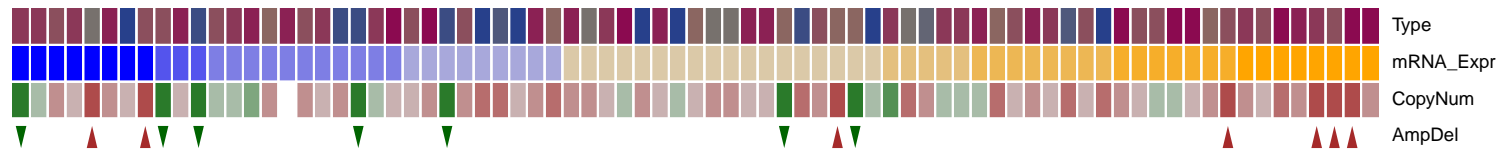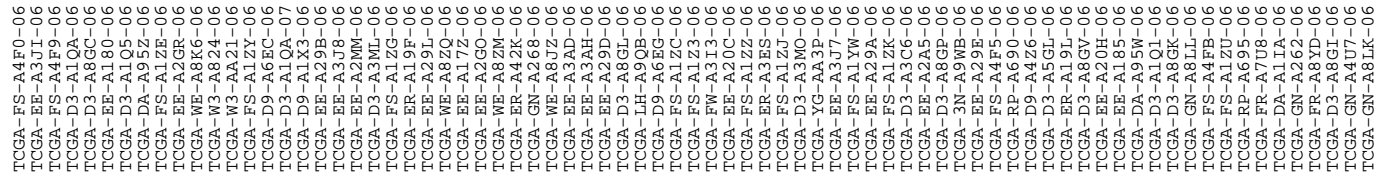

# GPR143

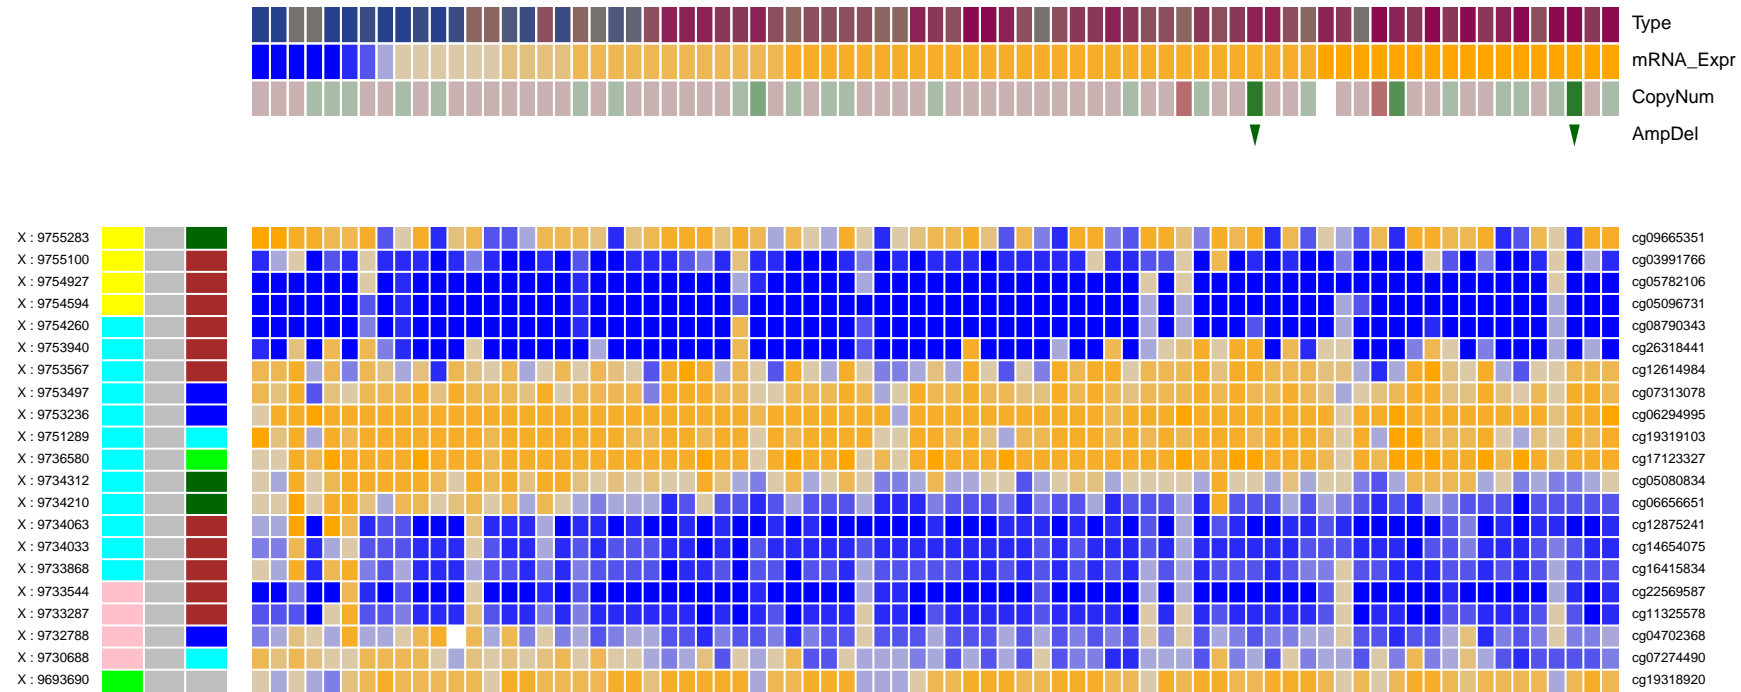

X: 9755283  
X: 9755100  
X: 9754927  
X: 9754594  
X: 9754260  
X: 9753940  
X: 9753567  
X: 9753497  
X: 9753236  
X: 9751289  
X: 9736580  
X: 9734312  
X: 9734210  
X: 9734063  
X: 9734033  
X: 9733868  
X: 9733544  
X: 9733287  
X: 9732788  
X: 9730688  
X: 9693690

GeneLoc  
PromoterAssoc  
CpGIsland

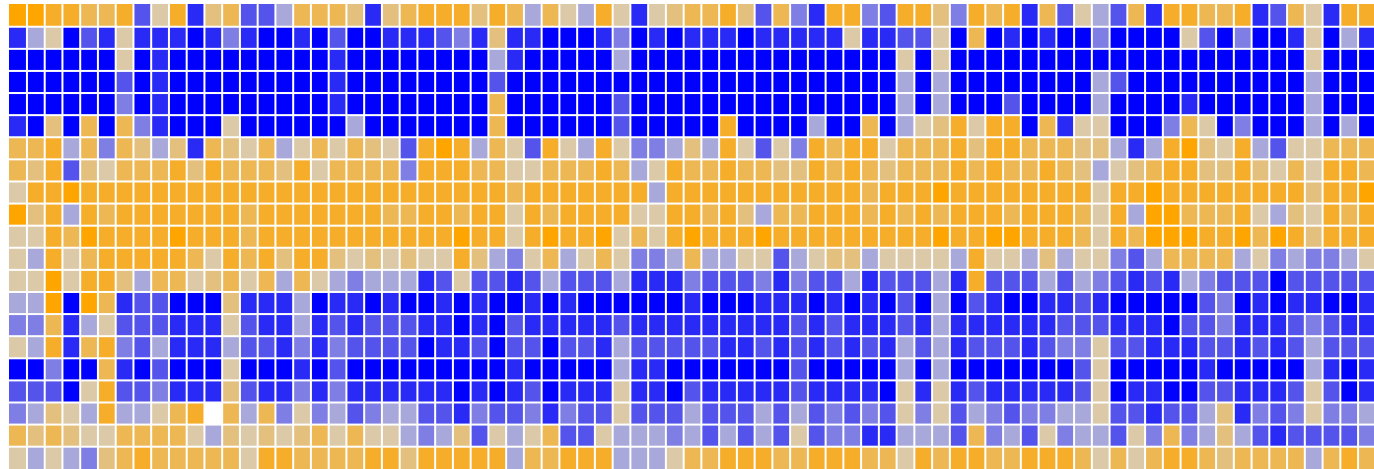

cg09665351  
cg03991766  
cg05782106  
cg05096731  
cg08790343  
cg26318441  
cg12614984  
cg07313078  
cg06294995  
cg19319103  
cg17123327  
cg05080834  
cg06656651  
cg12875241  
cg14654075  
cg16415834  
cg22569587  
cg11325578  
cg04702368  
cg07274490  
cg19318920

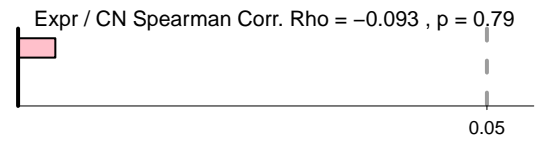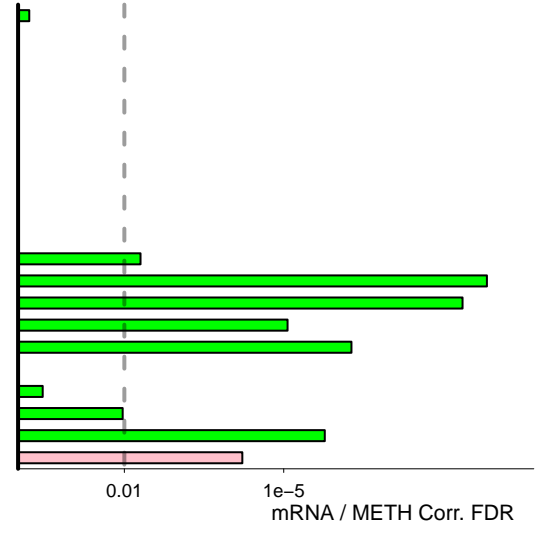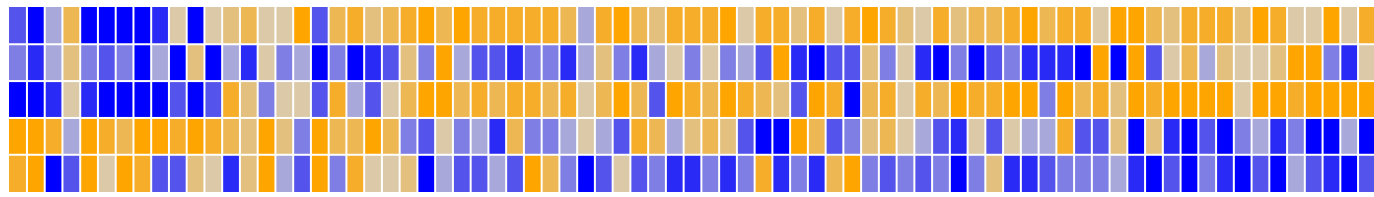

MITF  
SOX10  
TRPM1  
ZEB1  
AXL

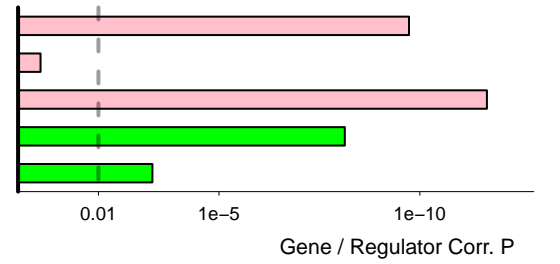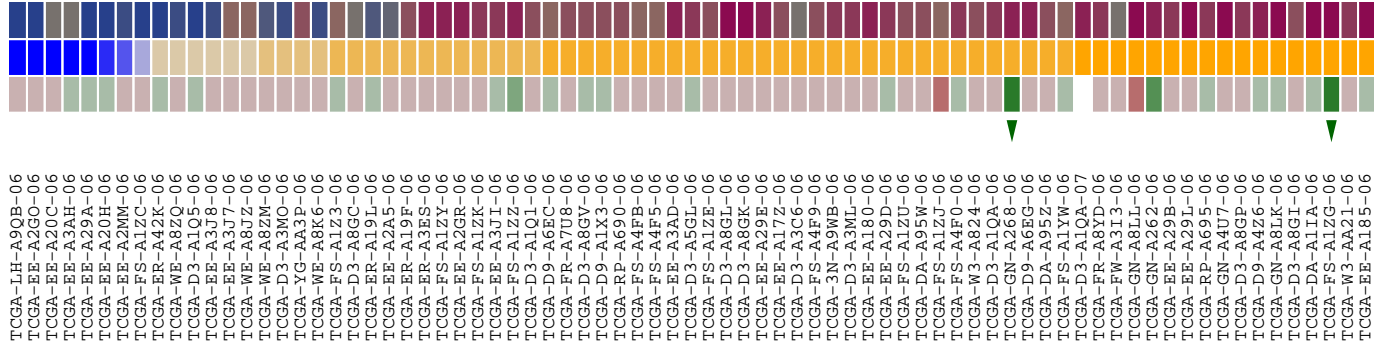

TCGA-LH-A90B-06  
TCGA-EE-A20G-06  
TCGA-EE-A20C-06  
TCGA-EE-A3AH-06  
TCGA-EE-A29A-06  
TCGA-EE-A20H-06  
TCGA-EE-A2MM-06  
TCGA-FS-A1ZC-06  
TCGA-ER-A42K-06  
TCGA-WE-A8Z0-06  
TCGA-D3-A105-06  
TCGA-EE-A3T8-06  
TCGA-EE-A3T7-06  
TCGA-WE-A8TZ-06  
TCGA-WE-A8ZM-06  
TCGA-D3-A3MO-06  
TCGA-YG-A33P-06  
TCGA-WE-A3K6-06  
TCGA-FS-A1Z3-06  
TCGA-D3-A6GC-06  
TCGA-ER-A19L-06  
TCGA-EE-AZAS-06  
TCGA-ER-A19F-06  
TCGA-ER-A3ES-06  
TCGA-FS-A1ZY-06  
TCGA-EE-A2GR-06  
TCGA-FS-A1ZK-06  
TCGA-EE-A3JI-06  
TCGA-FS-A1ZZ-06  
TCGA-D3-A1Q1-06  
TCGA-D9-A6EC-06  
TCGA-FR-A7U8-06  
TCGA-D3-A8GV-06  
TCGA-RP-A690-06  
TCGA-FS-A4FB-06  
TCGA-FS-A4F5-06  
TCGA-EE-A3AD-06  
TCGA-D3-A5GL-06  
TCGA-FS-A1ZE-06  
TCGA-D3-A8GL-06  
TCGA-D3-A8GK-06  
TCGA-EE-A29E-06  
TCGA-EE-A17Z-06  
TCGA-D3-A3C6-06  
TCGA-FS-A4F9-06  
TCGA-3N-A9WB-06  
TCGA-D3-A3ML-06  
TCGA-EE-A180-06  
TCGA-EE-A29D-06  
TCGA-FS-A3ZU-06  
TCGA-DA-A35W-06  
TCGA-FS-A1ZJ-06  
TCGA-FS-A4F0-06  
TCGA-W3-A6Z4-06  
TCGA-D3-A1QA-06  
TCGA-GN-A268-06  
TCGA-D9-A6EG-06  
TCGA-DA-A95Z-06  
TCGA-FS-A1YW-06  
TCGA-D3-A1QA-07  
TCGA-FR-A8YD-06  
TCGA-FW-A313-06  
TCGA-GN-A8LL-06  
TCGA-EE-A262-06  
TCGA-EE-A29B-06  
TCGA-EE-A29L-06  
TCGA-RP-A695-06  
TCGA-GN-A4U7-06  
TCGA-D3-A8GP-06  
TCGA-D9-A4Z6-06  
TCGA-GN-A8LK-06  
TCGA-D3-A8GI-06  
TCGA-DA-A1IA-06  
TCGA-FS-A1ZG-06  
TCGA-W3-AA21-06  
TCGA-EE-A185-06

Type  
mRNA\_Expr  
CopyNum  
AmpDel

# ST6GALNAC3

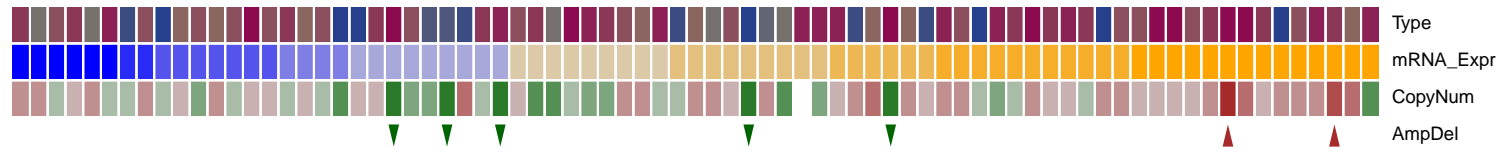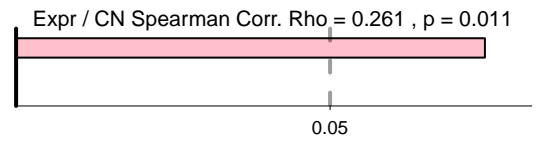

1: 76539186  
1: 76540110  
1: 76540148  
1: 76540168  
1: 76540222  
1: 76540236  
1: 76540438  
1: 76540465  
1: 76540574  
1: 76540641  
1: 76540999  
1: 76543815  
1: 76547234  
1: 76550508  
1: 76572603  
1: 76574405  
1: 76607010  
1: 76620271  
1: 76734569  
1: 76780549  
1: 76782984  
1: 76840032  
1: 76891398  
1: 76899846  
1: 77013304  
1: 77042560  
1: 77043128  
1: 77049380  
1: 77096137

GeneLoc  
PromoterAssoc  
CpGIsland

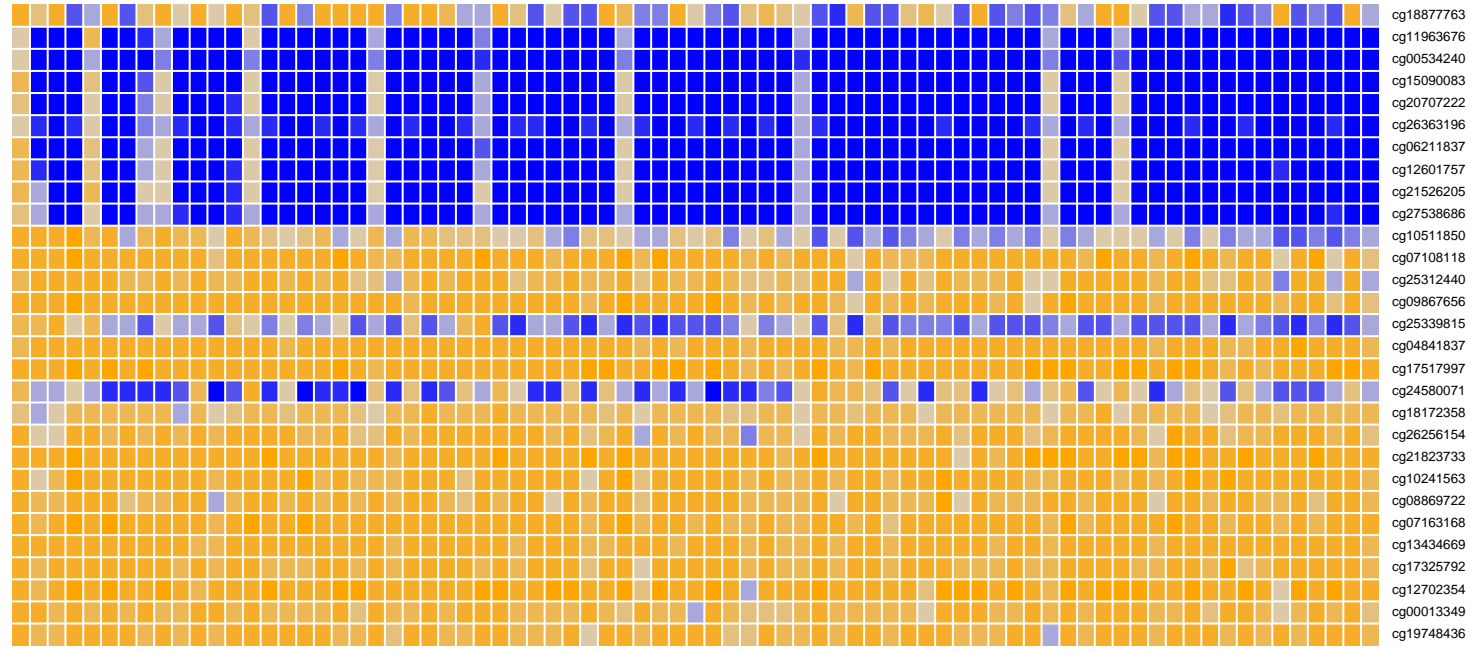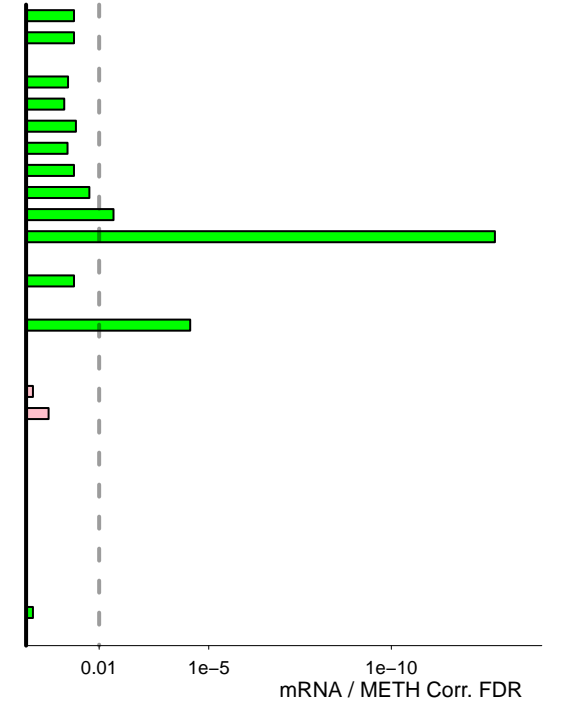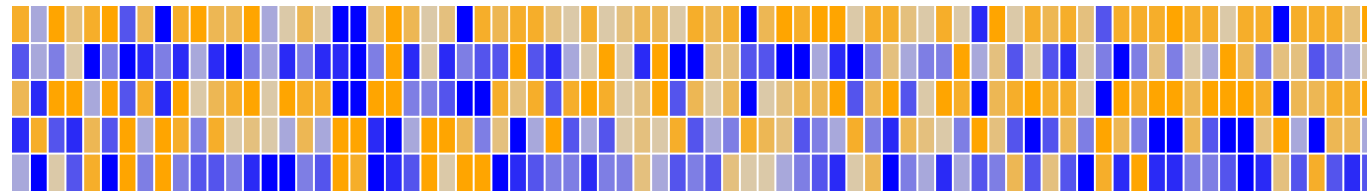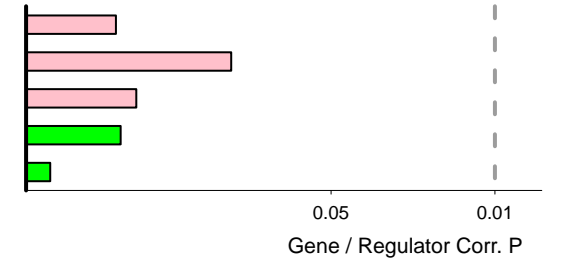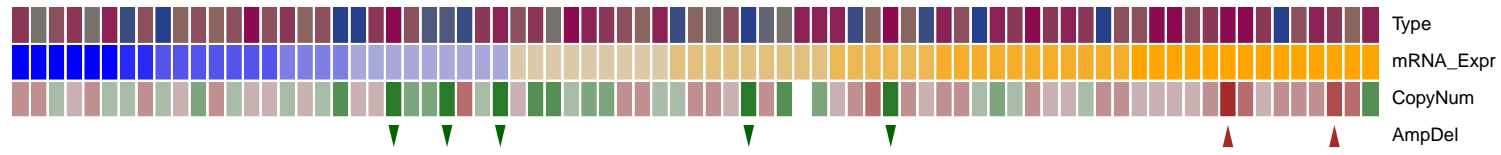

TCGA-EE-A3JI-06  
TCGA-EE-A20C-06  
TCGA-RP-A690-06  
TCGA-EE-A29B-06  
TCGA-D3-A8GC-06  
TCGA-ER-A3ES-06  
TCGA-WE-A8K6-06  
TCGA-FR-A7U8-06  
TCGA-EE-A29A-06  
TCGA-YG-AA3P-06  
TCGA-FS-A4FB-06  
TCGA-W3-A824-06  
TCGA-D3-A8GT-06  
TCGA-D3-A8GV-06  
TCGA-R3-AA21-06  
TCGA-FS-A1Z1-06  
TCGA-DA-A95W-06  
TCGA-EE-A2GO-06  
TCGA-FS-A1ZC-06  
TCGA-FS-A4F0-06  
TCGA-GN-A8LL-06  
TCGA-DA-A95Z-06  
TCGA-WE-A8ZM-06  
TCGA-ER-A19L-06  
TCGA-EE-A2MM-06  
TCGA-D3-A3ML-06  
TCGA-GN-A262-06  
TCGA-EE-A17Z-06  
TCGA-FS-A1ZK-06  
TCGA-D3-A3C6-06  
TCGA-D3-A8GK-06  
TCGA-EE-A3AL-06  
TCGA-FR-A8YD-06  
TCGA-FS-A1ZU-06  
TCGA-WE-A8JZ-06  
TCGA-FS-A1ZY-06  
TCGA-WE-A8ZQ-06  
TCGA-FS-A1ZU-06  
TCGA-EE-A3AH-06  
TCGA-ER-A19F-06  
TCGA-EE-A20H-06  
TCGA-EE-A2A5-06  
TCGA-FW-A313-06  
TCGA-D3-A1O8-07  
TCGA-EE-A2GF-06  
TCGA-D9-A6EG-06  
TCGA-EE-A3J8-06  
TCGA-D9-A6EC-06  
TCGA-GN-A8LK-06  
TCGA-FS-A4F5-06  
TCGA-D3-A3MO-06  
TCGA-GN-A268-06  
TCGA-D3-A8GI-06  
TCGA-ER-A42K-06  
TCGA-EE-A180-06  
TCGA-EE-A185-06  
TCGA-EE-A185-06  
TCGA-D3-A1QA-06  
TCGA-FS-A1ZZ-06  
TCGA-D3-A8GP-06  
TCGA-LH-A9QB-06  
TCGA-FS-A4F9-06  
TCGA-D3-A1Q1-06  
TCGA-GN-A4U7-06  
TCGA-FS-A1ZG-06  
TCGA-RP-A695-06  
TCGA-EE-A29L-06  
TCGA-DA-A1IA-06  
TCGA-EE-A29L-06  
TCGA-D3-A5GL-06  
TCGA-D3-A1Q5-06  
TCGA-D9-A1X3-06  
TCGA-EE-A29E-06  
TCGA-EE-A29D-06  
TCGA-EE-A3J7-06  
TCGA-D9-A4Z6-06

# RAP1GAP

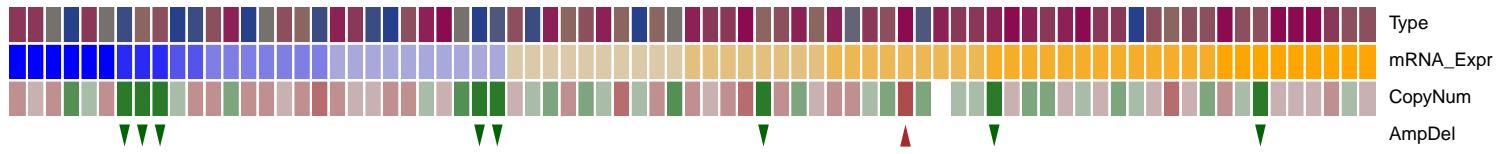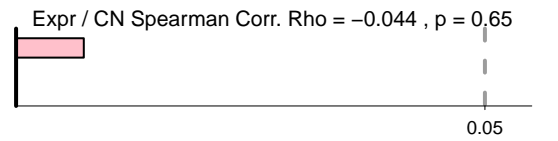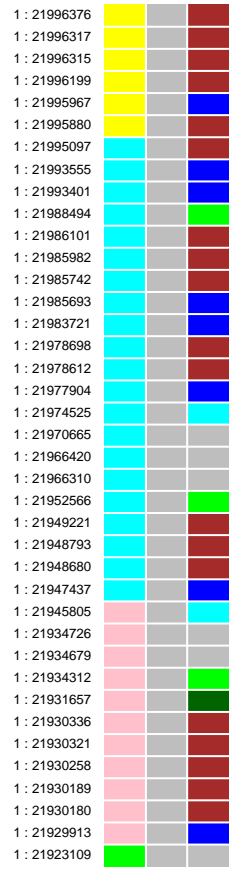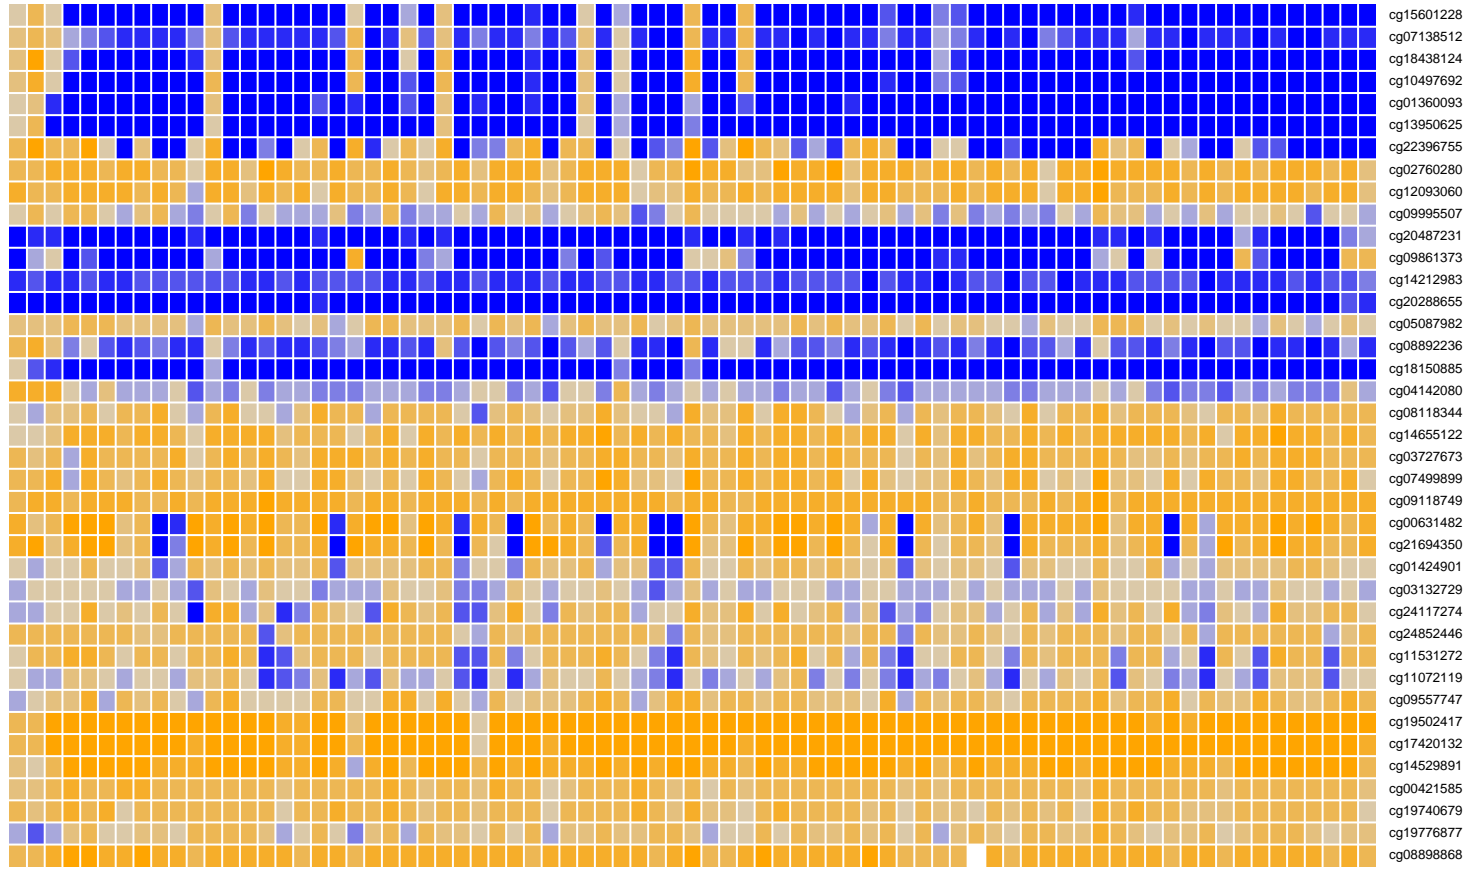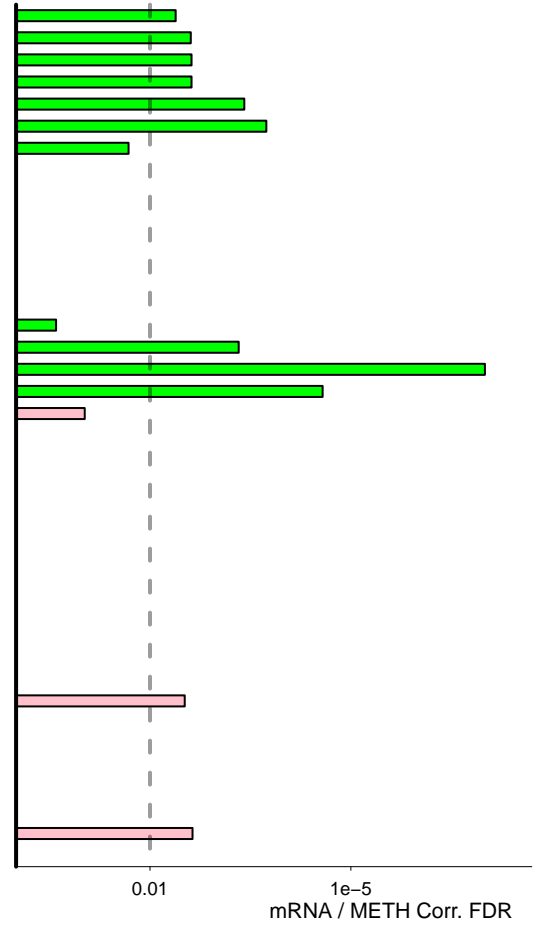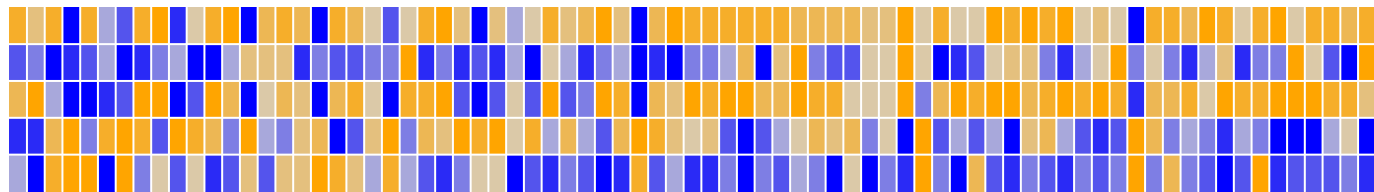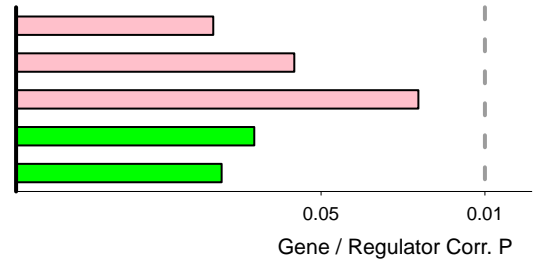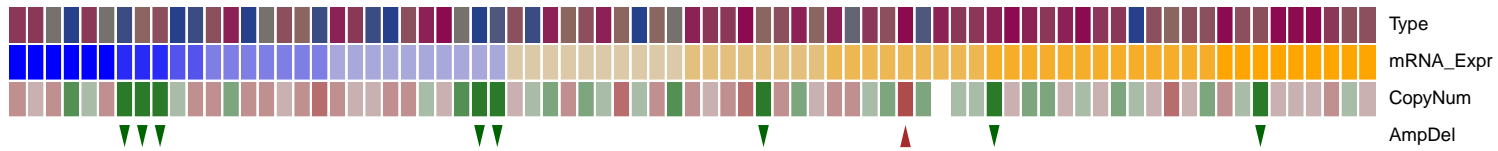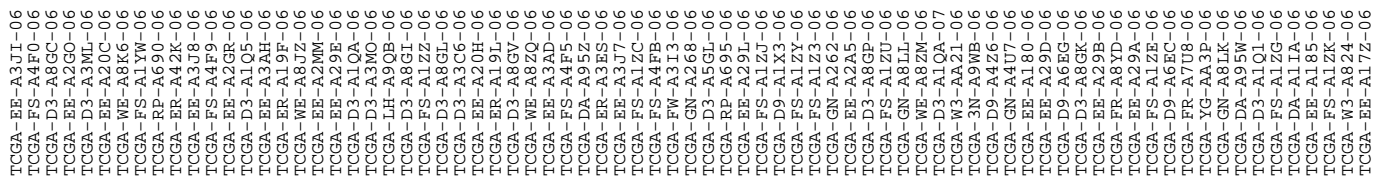

# CPVL

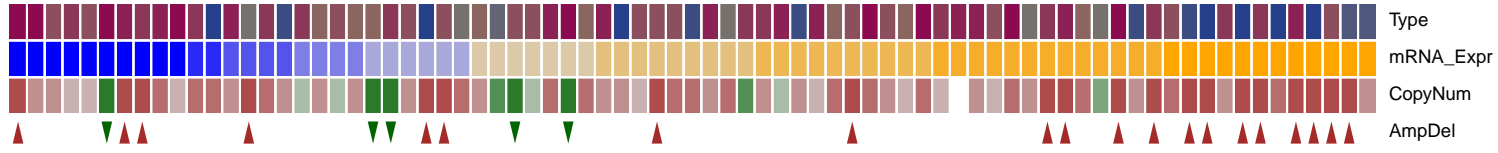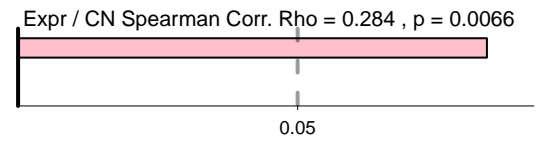

7 : 29235180  
7 : 29234993  
7 : 29234987  
7 : 29234965  
7 : 29234786  
7 : 29234470  
7 : 29234262  
7 : 29234082  
7 : 29233705  
7 : 29233476  
7 : 29233468  
7 : 29229717  
7 : 29186889  
7 : 29186347  
7 : 29186267  
7 : 29186234  
7 : 29186231  
7 : 29186228  
7 : 29186183  
7 : 29186153  
7 : 29186110  
7 : 29185965  
7 : 29153560  
7 : 29111255  
7 : 29084204  
7 : 29047433  
7 : 29040109  
7 : 29037910

GeneLoc  
PromoterAssoc  
CpGIsland

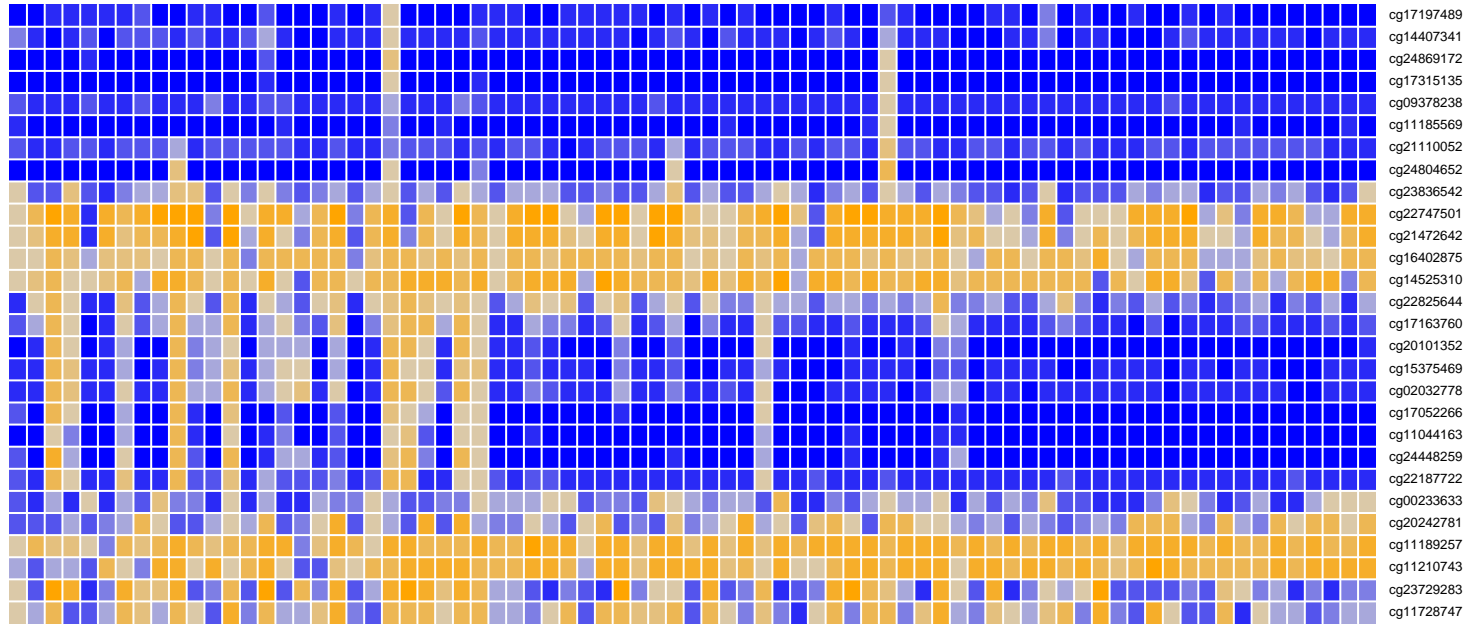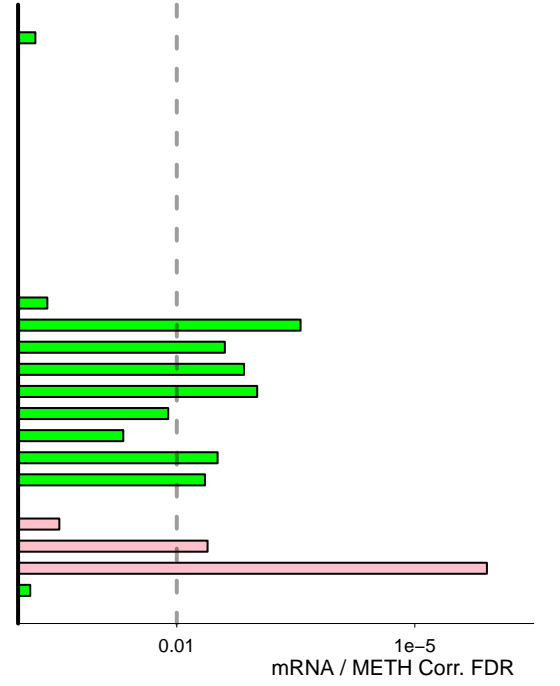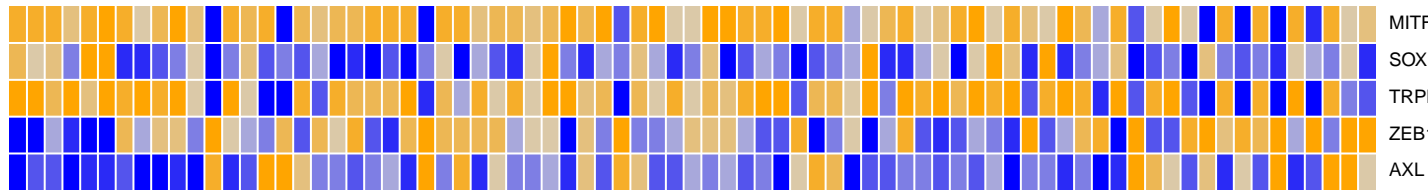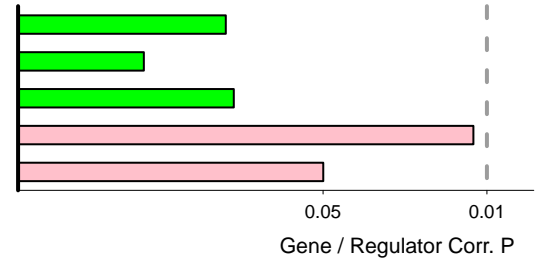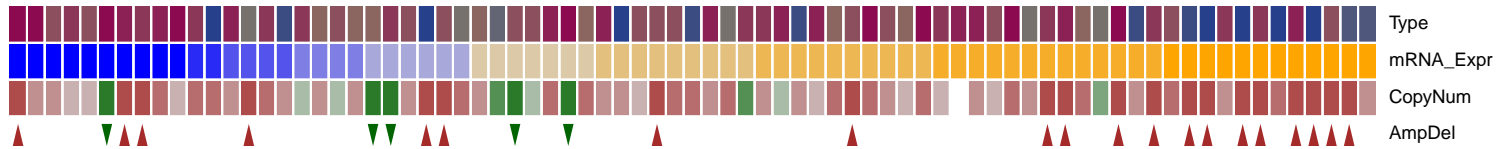

TCGA-EE-A29L-06  
TCGA-EE-A185-06  
TCGA-D9-A1X3-06  
TCGA-FS-A4F0-06  
TCGA-EE-A17Z-06  
TCGA-GN-A8LL-06  
TCGA-FS-A1ZZ-06  
TCGA-W3-AA21-06  
TCGA-GN-A262-06  
TCGA-D3-A8GL-06  
TCGA-D3-A8GP-06  
TCGA-FS-A1ZC-06  
TCGA-GN-A268-06  
TCGA-EE-A3AH-06  
TCGA-D3-A3ML-06  
TCGA-EE-A2MM-06  
TCGA-DE-A1OX-06  
TCGA-FS-A4F5-06  
TCGA-W3-A624-06  
TCGA-FS-A4FB-06  
TCGA-FS-A1ZJ-06  
TCGA-EE-A3JI-06  
TCGA-FS-A4F9-06  
TCGA-EE-A29A-06  
TCGA-FS-A1ZE-06  
TCGA-D3-A8GC-06  
TCGA-EE-A3J7-06  
TCGA-EE-A2A5-06  
TCGA-FR-A7U8-06  
TCGA-FS-A1ZY-06  
TCGA-FS-A1ZG-06  
TCGA-WE-A8JZ-06  
TCGA-EE-A2GR-06  
TCGA-LH-A9QB-06  
TCGA-ER-A19F-06  
TCGA-YG-AA3P-06  
TCGA-DA-A95W-06  
TCGA-D3-A3MO-06  
TCGA-EE-A180-06  
TCGA-FW-A3I3-06  
TCGA-RP-A695-06  
TCGA-FS-A1ZK-06  
TCGA-ER-A3ES-06  
TCGA-ER-A3T8-06  
TCGA-EE-A29E-06  
TCGA-D9-A6EC-06  
TCGA-D3-A8GV-06  
TCGA-DA-A1IA-06  
TCGA-DA-A65Z-06  
TCGA-FS-A1YW-06  
TCGA-D3-A6GK-06  
TCGA-EE-A29B-06  
TCGA-D3-A1QA-07  
TCGA-D9-A4Z6-06  
TCGA-D3-A6GI-06  
TCGA-GN-A8LK-06  
TCGA-D3-A3C6-06  
TCGA-FR-A8YD-06  
TCGA-D9-A6EG-06  
TCGA-FS-A1Z3-06  
TCGA-EE-A20C-06  
TCGA-GN-AA47-06  
TCGA-WE-A8K6-06  
TCGA-3N-A9WB-06  
TCGA-RP-A690-06  
TCGA-WE-A8ZQ-06  
TCGA-D3-A1Q5-06  
TCGA-D3-A5GL-06  
TCGA-EE-A20H-06  
TCGA-EE-A29D-06  
TCGA-EE-A2GO-06  
TCGA-EE-A3AD-06  
TCGA-ER-A42K-06  
TCGA-D3-A1O1-06  
TCGA-WE-A8ZM-06  
TCGA-ER-A19L-06

# ACP5

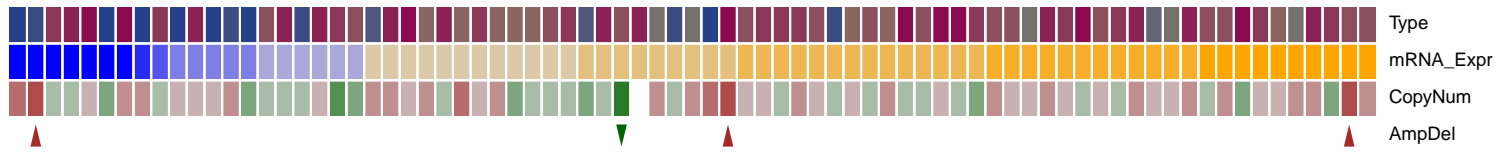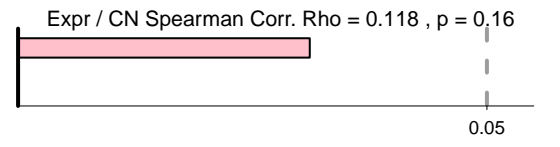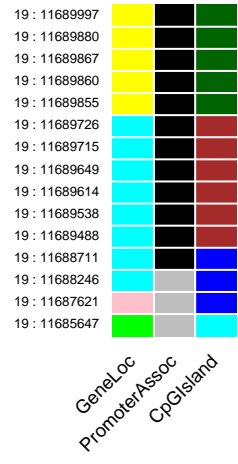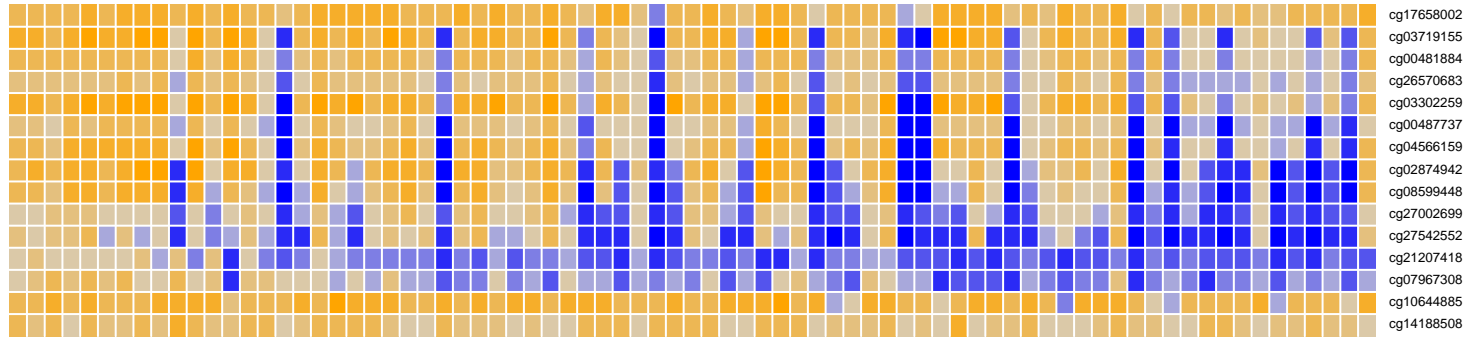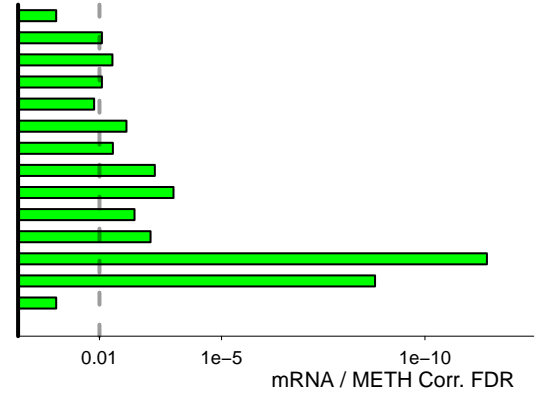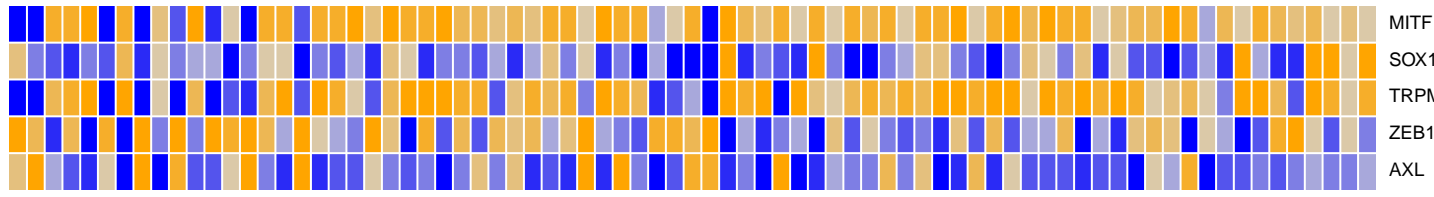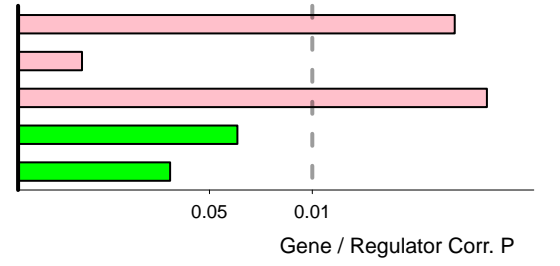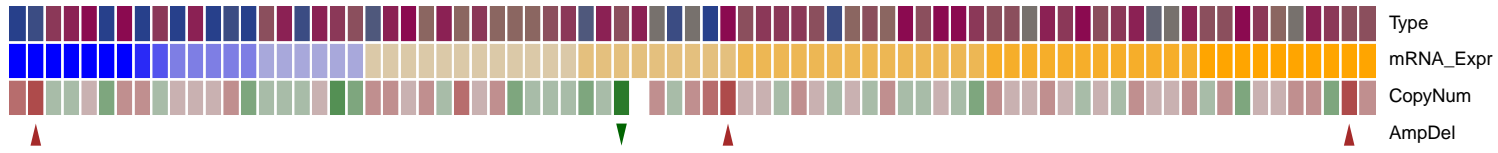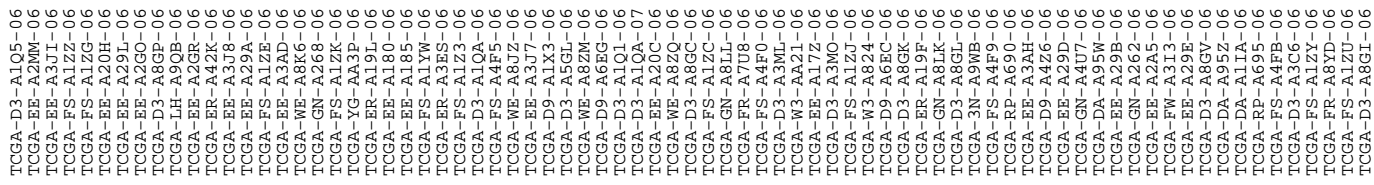

# LZTS1

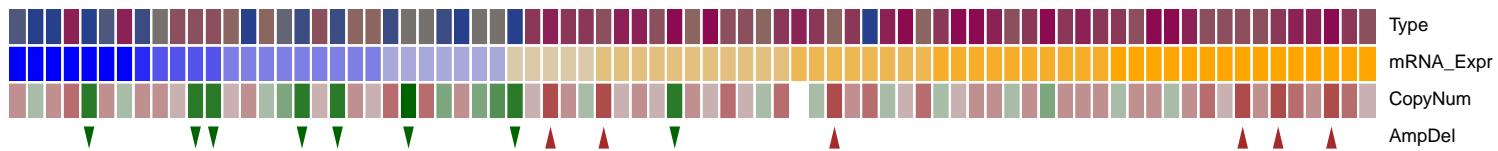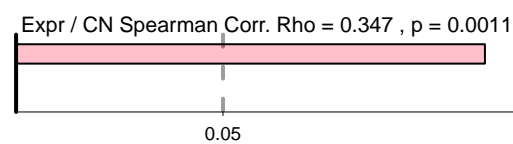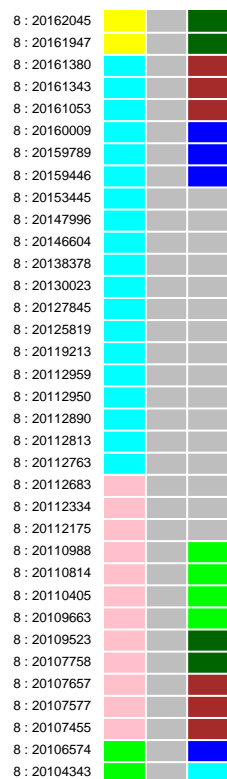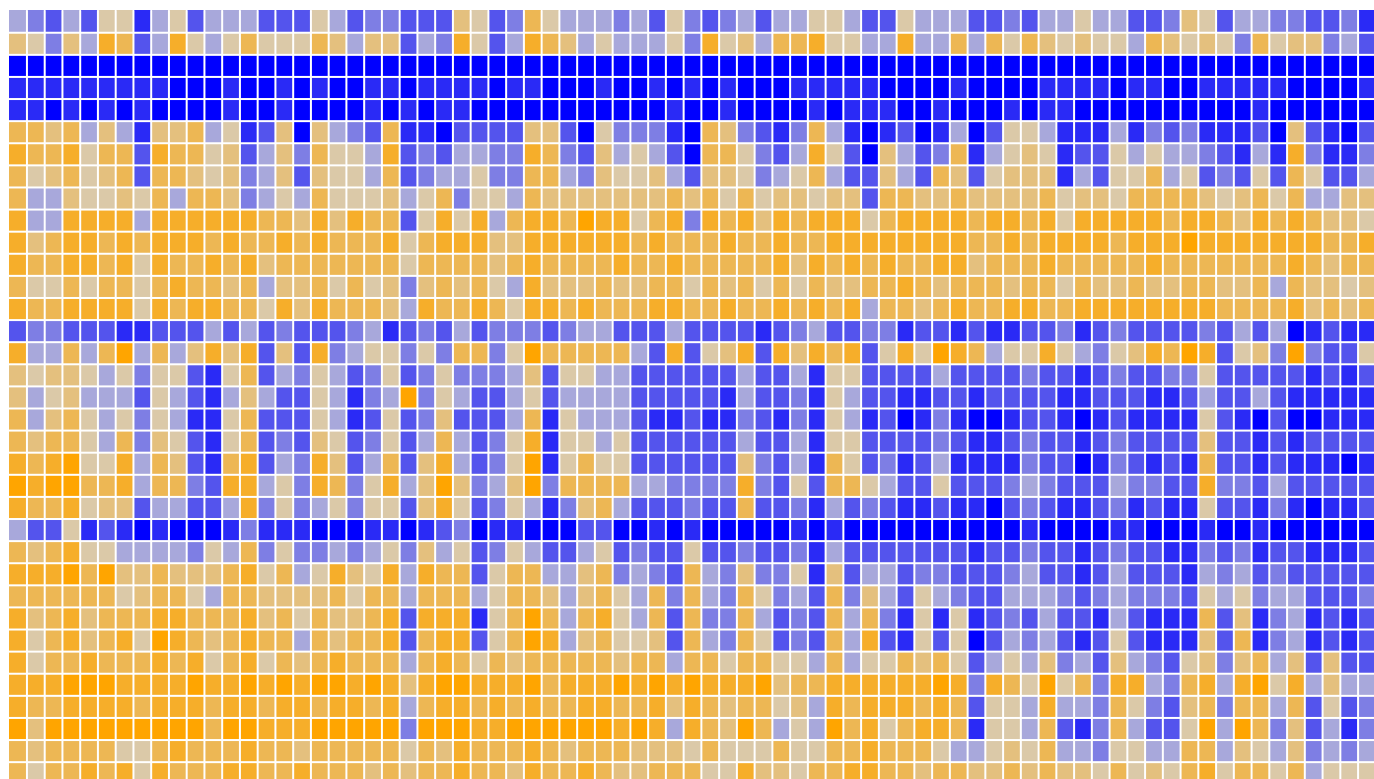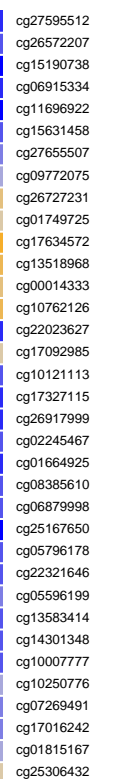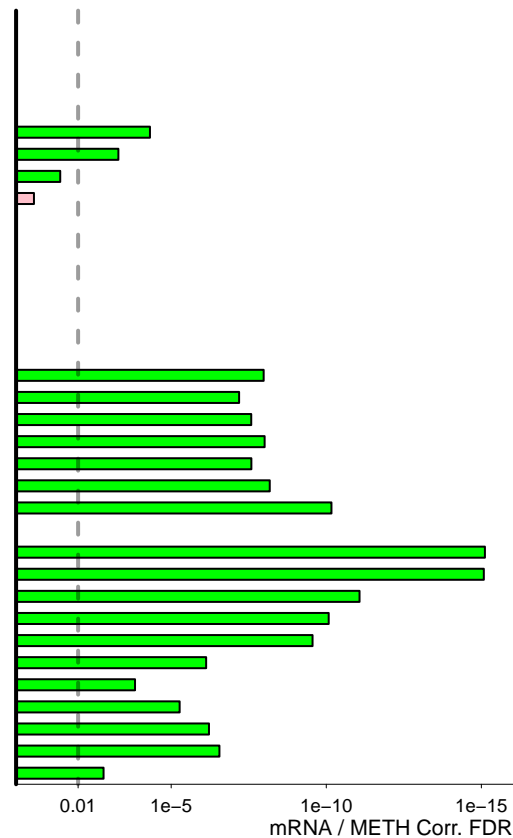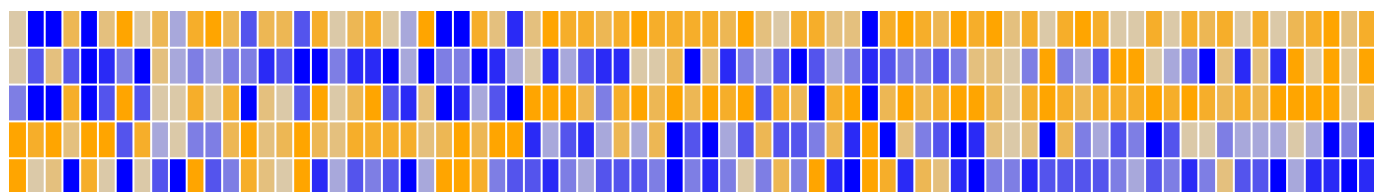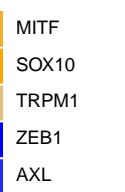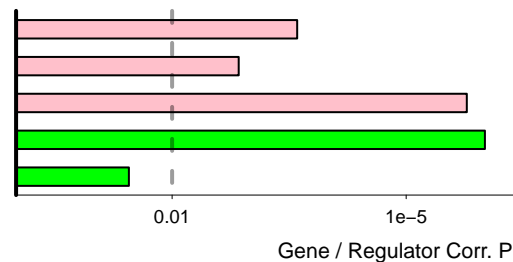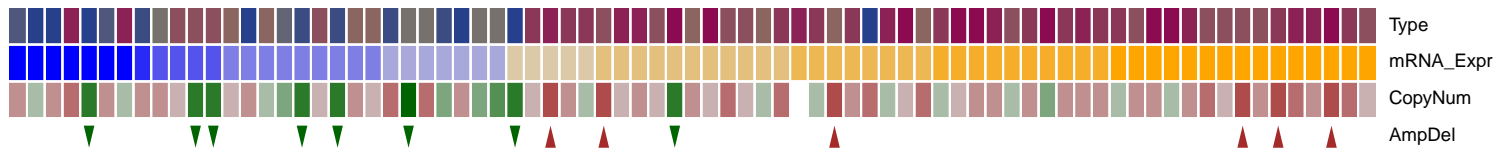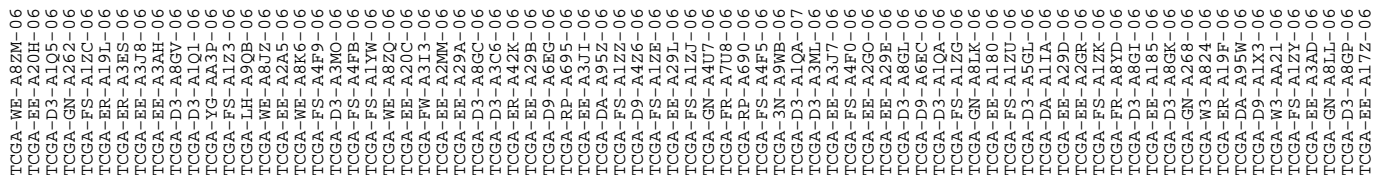



# CEACAM1

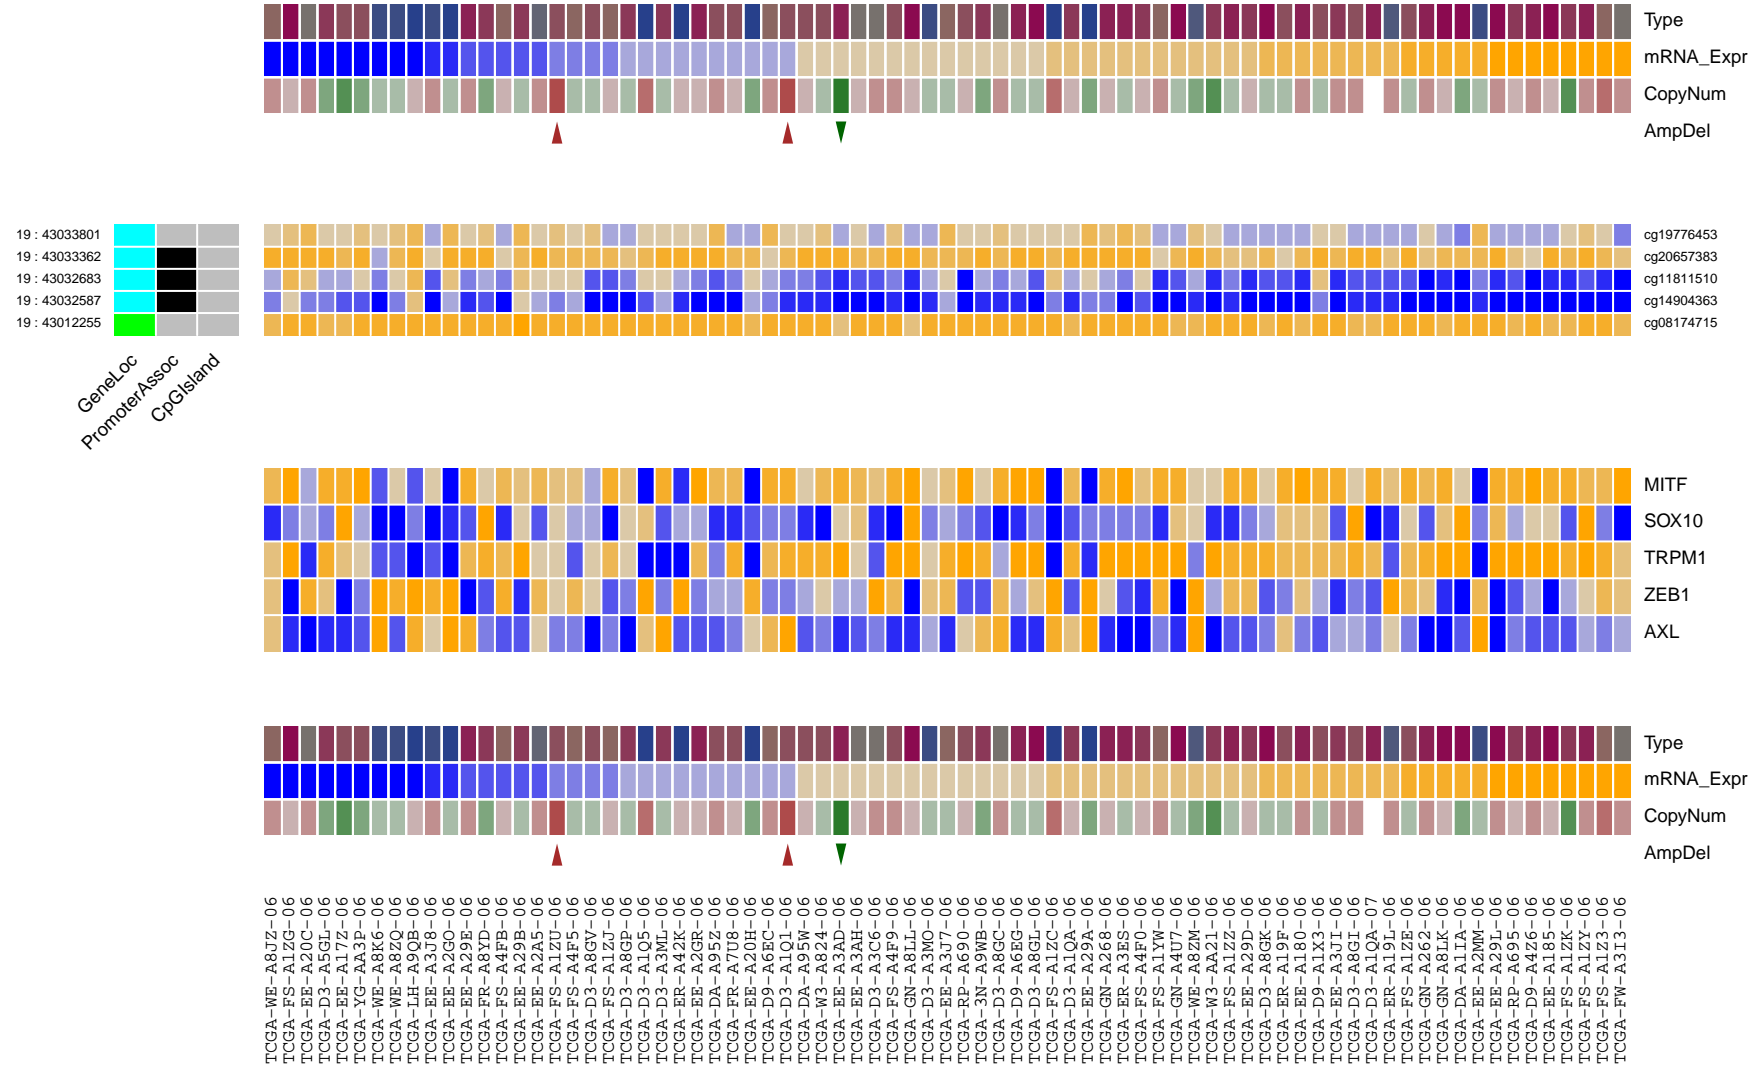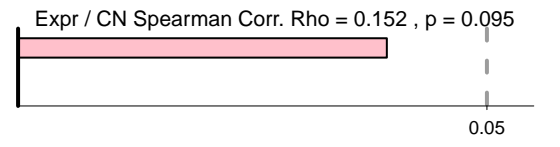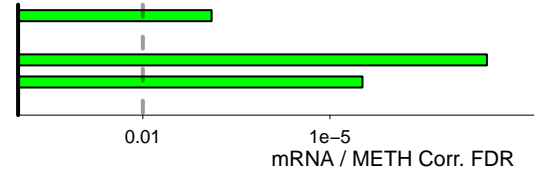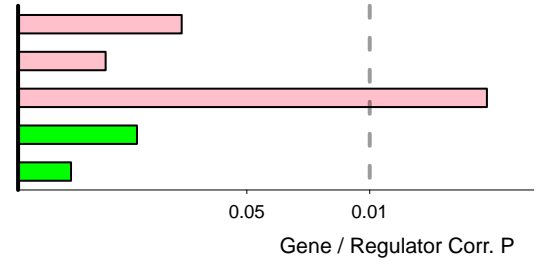

# LAMA1

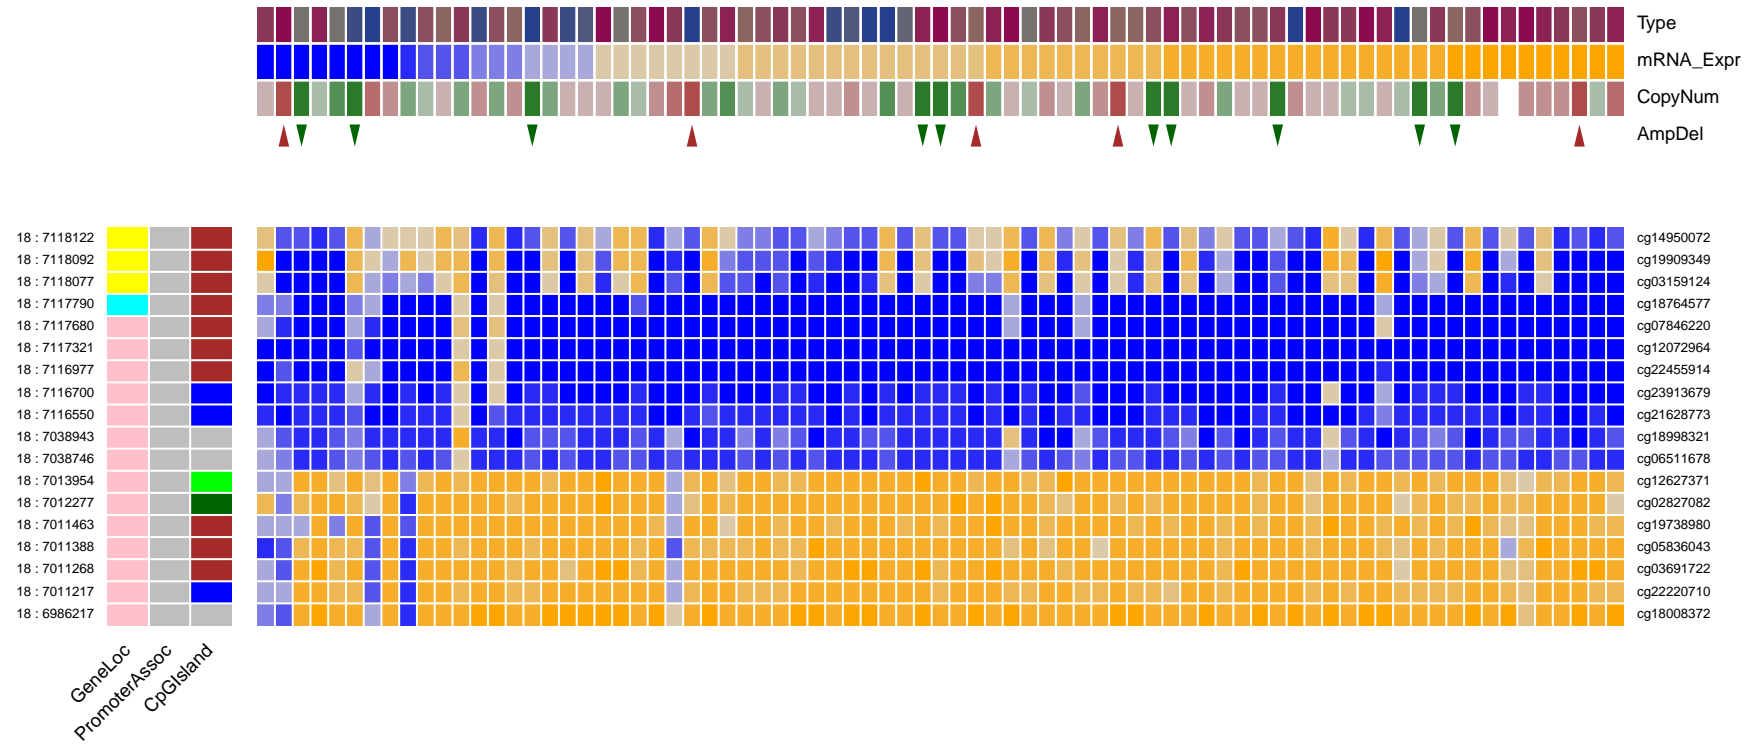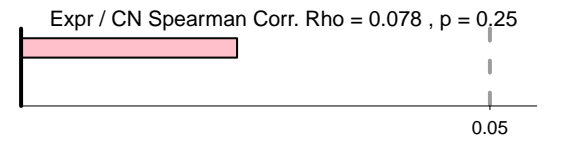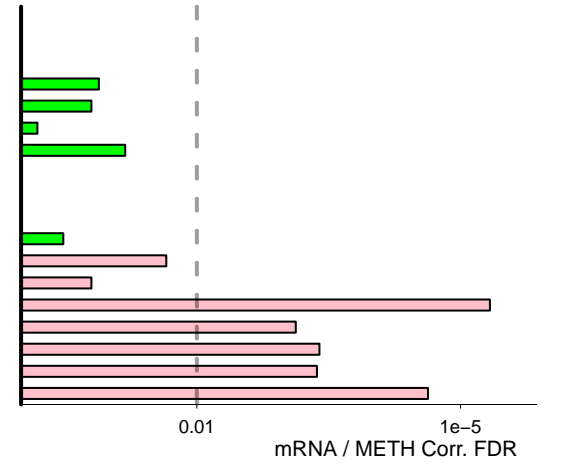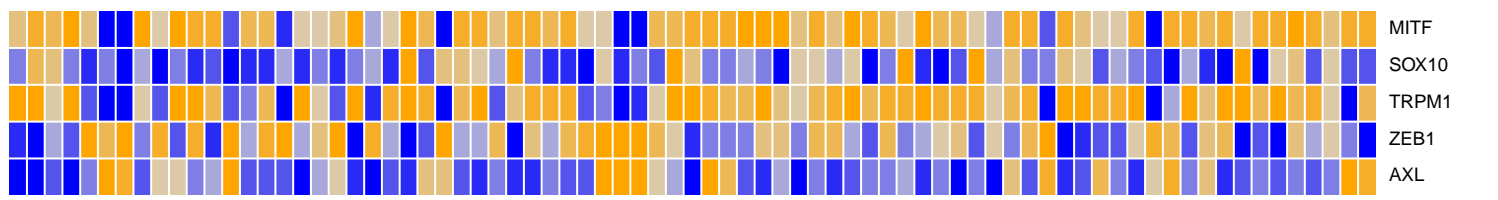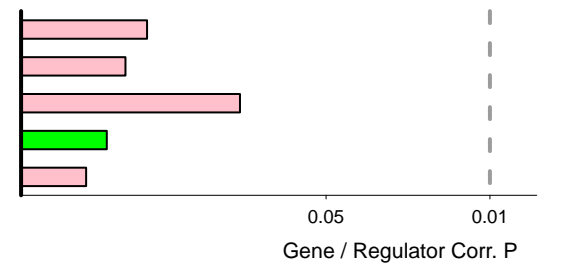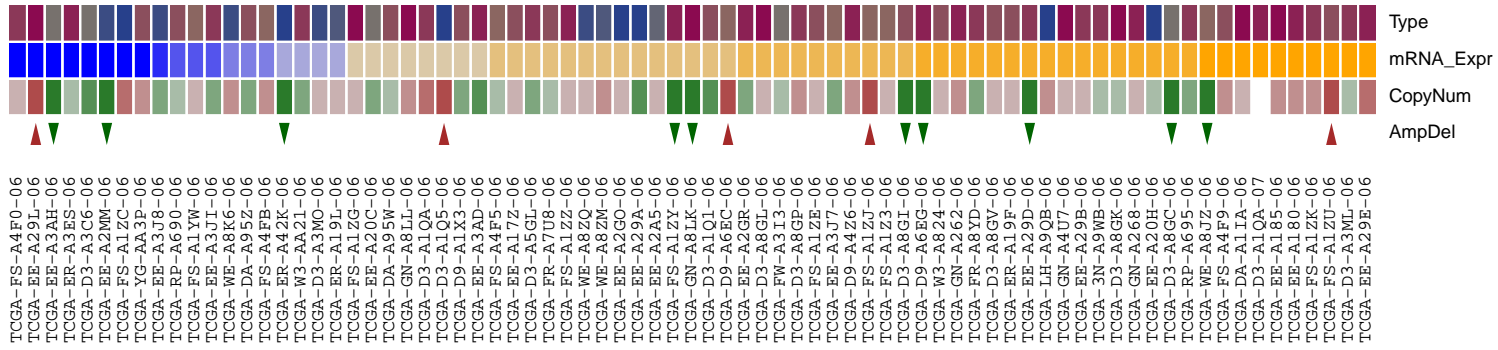

Supplement: 41467_2022_31510_MOESM11_ESM.pdf [file 41467_2022_31510_MOESM11_ESM.pdf]
