# Supplementary material for: Multi-modal molecular programs regulate melanoma cell state
Source: PubMed Central journal article supplement (PMC9271073; doi:10.1038/s41467-022-31510-1), 2022-07-09

**Supplementary Data 10: MES gene regulatory influences - TCGA melanomas.**

# EGFR

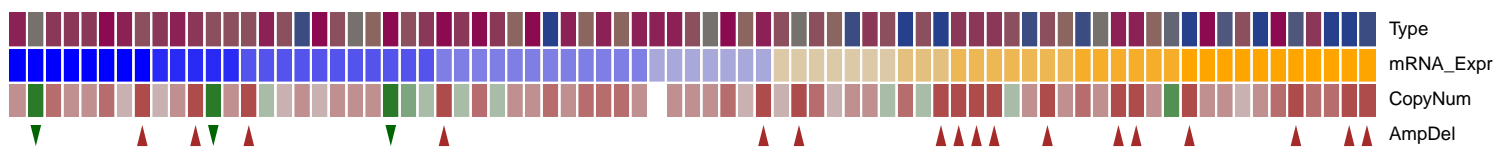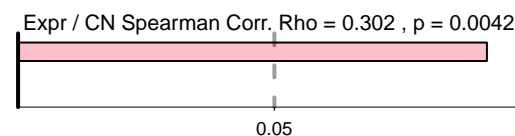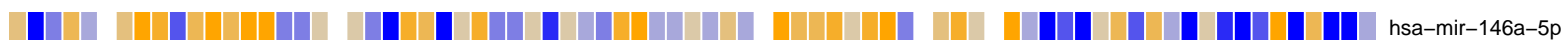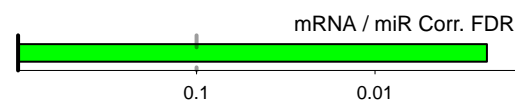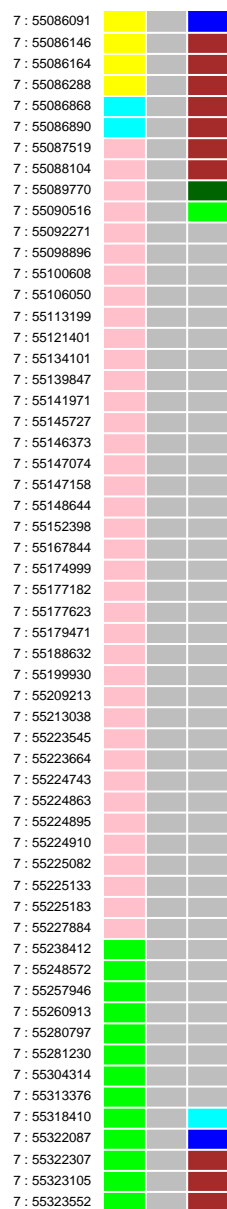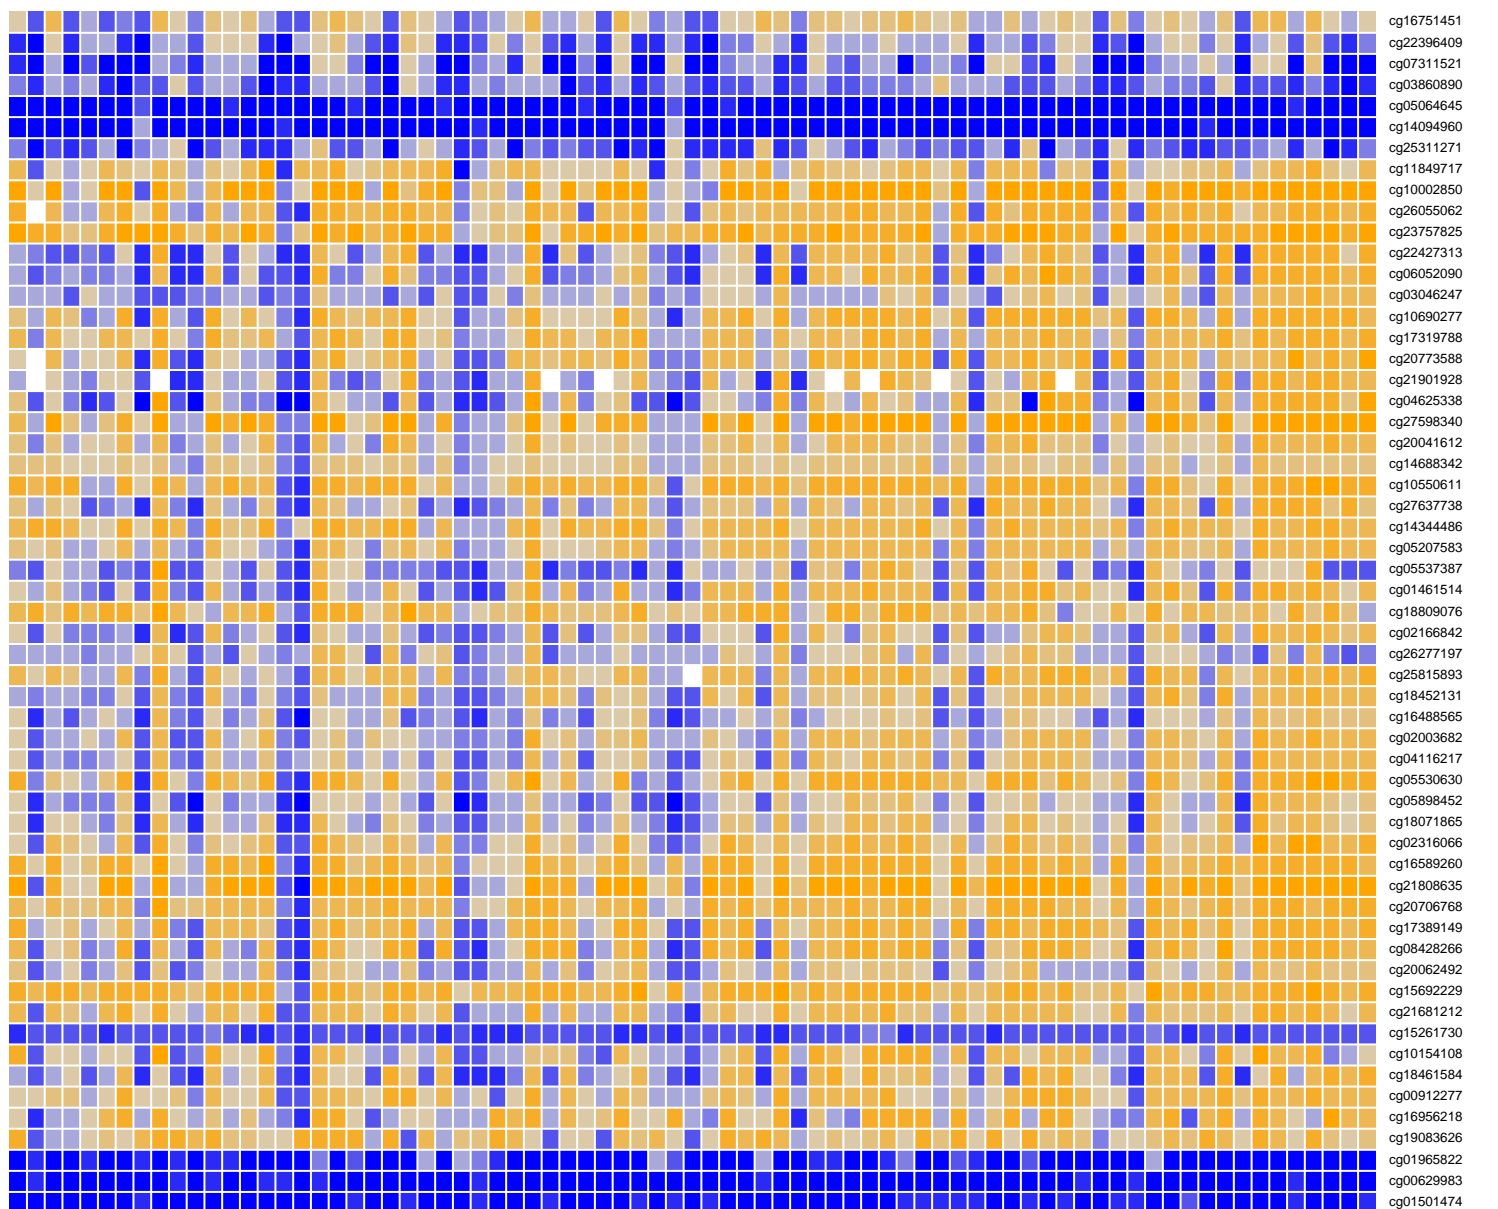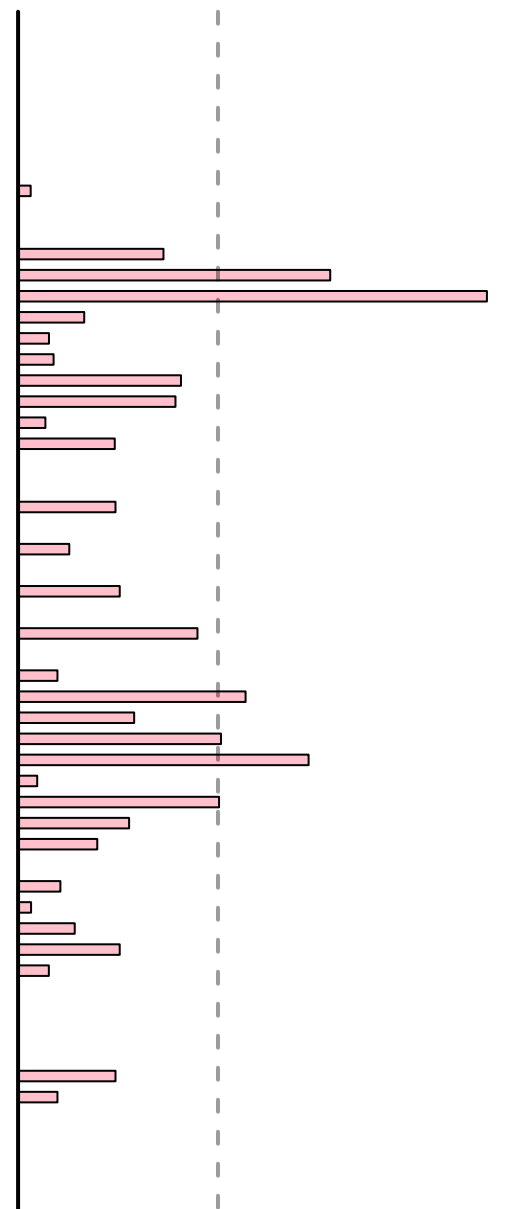

GeneLoc  
PromoterAssoc  
CpGIsland

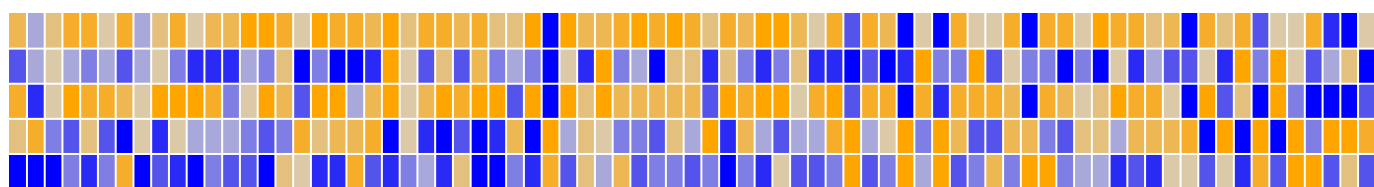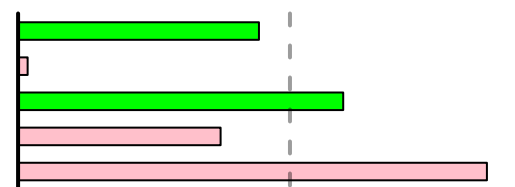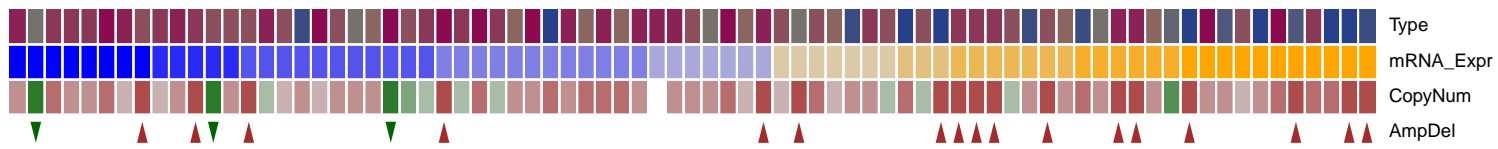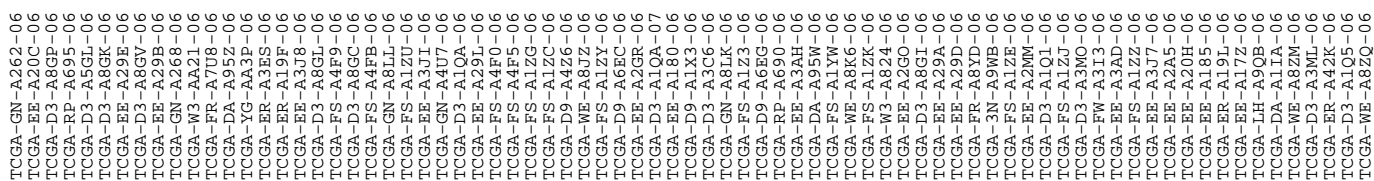

# TSPAN5

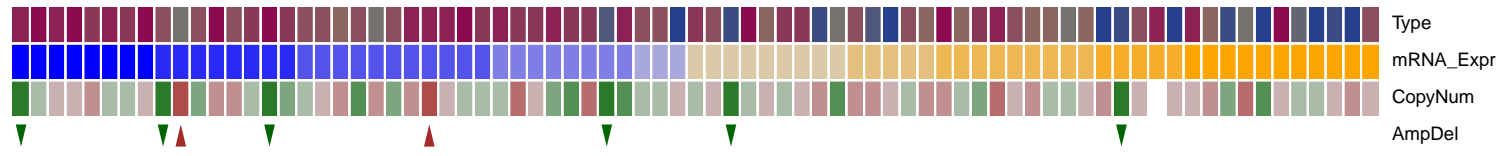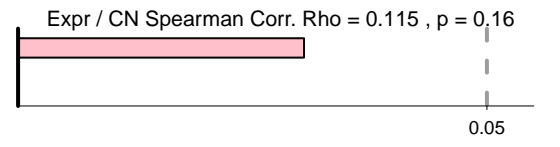

4 : 99580849  
 4 : 99580530  
 4 : 99580143  
 4 : 99580121  
 4 : 99579971  
 4 : 99579615  
 4 : 99579248  
 4 : 99578720  
 4 : 99577266  
 4 : 99576808  
 4 : 99562017  
 4 : 99559622  
 4 : 99552952  
 4 : 99531141  
 4 : 99529282  
 4 : 99504122  
 4 : 99502614  
 4 : 99487497  
 4 : 99480257  
 4 : 99479630  
 4 : 99477634  
 4 : 99459756  
 4 : 99449246  
 4 : 99445460  
 4 : 99430524  
 4 : 99427937  
 4 : 99418921  
 4 : 99407996  
 4 : 99404186  
 4 : 99402843  
 4 : 99393613

GeneLoc  
 PromoterAssoc  
 CpIsland

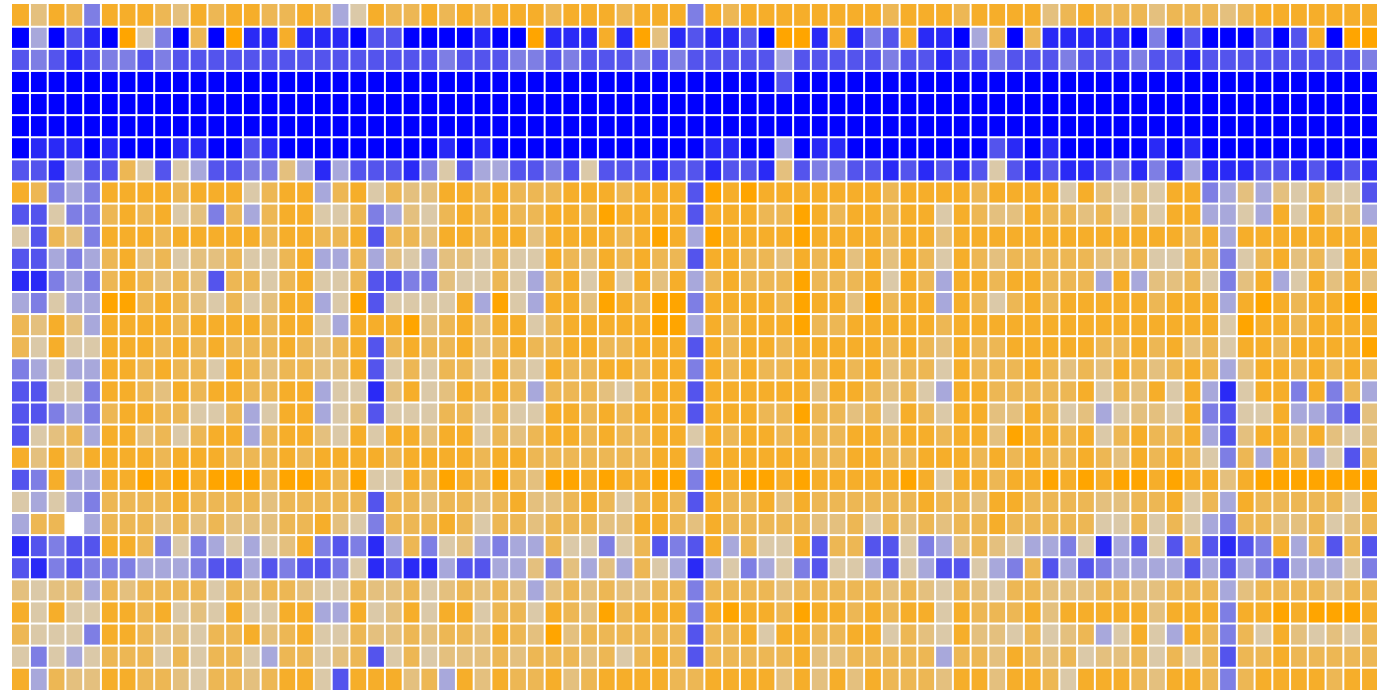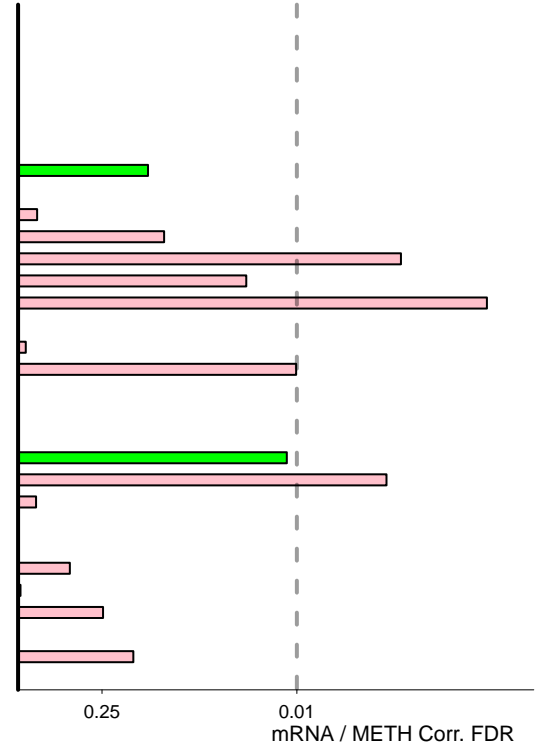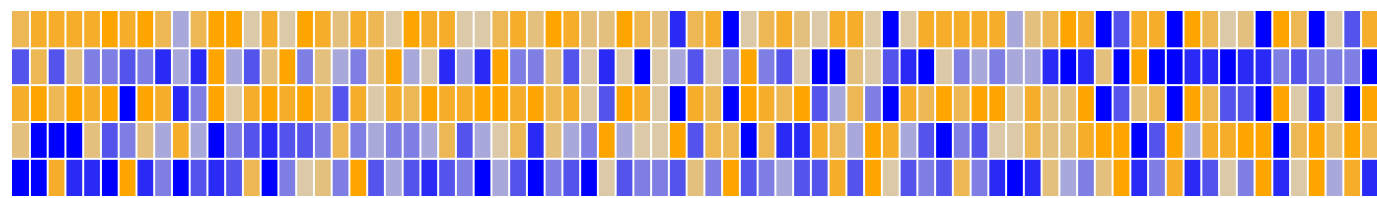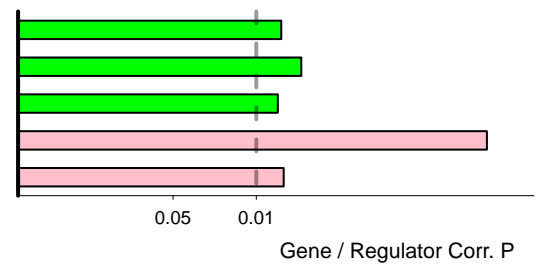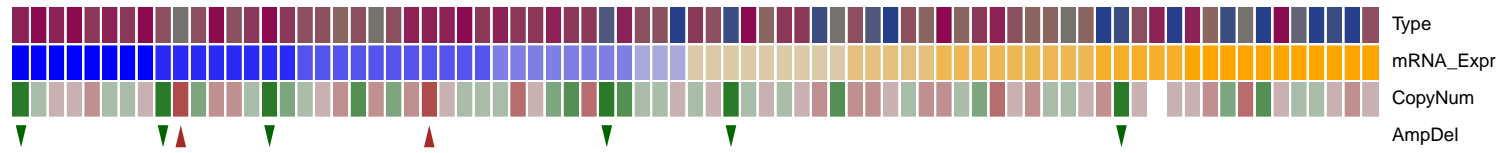

TCGA-GN-A262-06  
 TCGA-EE-A29L-06  
 TCGA-EE-A29E-06  
 TCGA-GN-A4U7-06  
 TCGA-D3-A5GL-06  
 TCGA-ER-A3ES-06  
 TCGA-D3-A3ML-06  
 TCGA-D3-A8GL-06  
 TCGA-FR-A7U8-06  
 TCGA-EE-A20C-06  
 TCGA-DA-A95Z-06  
 TCGA-GN-A8LL-06  
 TCGA-YG-A3P-06  
 TCGA-3N-A9WB-06  
 TCGA-GN-A8LK-06  
 TCGA-FR-A8YD-06  
 TCGA-EP-A690-06  
 TCGA-ER-A19F-06  
 TCGA-FS-A4F5-06  
 TCGA-D3-A1Q1-06  
 TCGA-EE-A3AH-06  
 TCGA-D3-A6GI-06  
 TCGA-EE-A2GR-06  
 TCGA-EE-A3AD-06  
 TCGA-FS-A1ZZ-06  
 TCGA-D3-A8GK-06  
 TCGA-W3-AA21-06  
 TCGA-FS-A1ZY-06  
 TCGA-EE-A29D-06  
 TCGA-FS-A4F0-06  
 TCGA-EE-A180-06  
 TCGA-FS-A1ZK-06  
 TCGA-D3-A8GP-06  
 TCGA-ER-A19L-06  
 TCGA-D9-A4Z6-06  
 TCGA-W3-A824-06  
 TCGA-FS-A1ZU-06  
 TCGA-ER-A42K-06  
 TCGA-D3-A1QA-06  
 TCGA-EE-A2MM-06  
 TCGA-DA-A1IA-06  
 TCGA-FS-A1Z3-06  
 TCGA-EE-A3TI-06  
 TCGA-EE-A29B-06  
 TCGA-WE-A8Z0-06  
 TCGA-D3-A8GC-06  
 TCGA-D9-A1Y3-06  
 TCGA-WE-A67M-06  
 TCGA-EE-A20H-06  
 TCGA-DA-A65W-06  
 TCGA-FS-A1ZV-06  
 TCGA-EE-A185-06  
 TCGA-D9-A6EC-06  
 TCGA-RP-A6J5-06  
 TCGA-GN-A268-06  
 TCGA-D3-A8GV-06  
 TCGA-EE-A3U7-06  
 TCGA-WE-A8UZ-06  
 TCGA-FW-A3I3-06  
 TCGA-FS-A1YW-06  
 TCGA-D3-A1O5-06  
 TCGA-WE-A8K6-06  
 TCGA-EE-A17Z-06  
 TCGA-D3-A1QA-07  
 TCGA-FS-A1ZC-06  
 TCGA-D9-A6EG-06  
 TCGA-FS-A4FB-06  
 TCGA-EE-A3J8-06  
 TCGA-D3-A3C6-06  
 TCGA-EE-A2GO-06  
 TCGA-FS-A1ZG-06  
 TCGA-EE-A2A5-06  
 TCGA-EE-A29A-06  
 TCGA-D3-A3MO-06  
 TCGA-LH-A9QB-06  
 TCGA-FS-A4F9-06

# NRP1

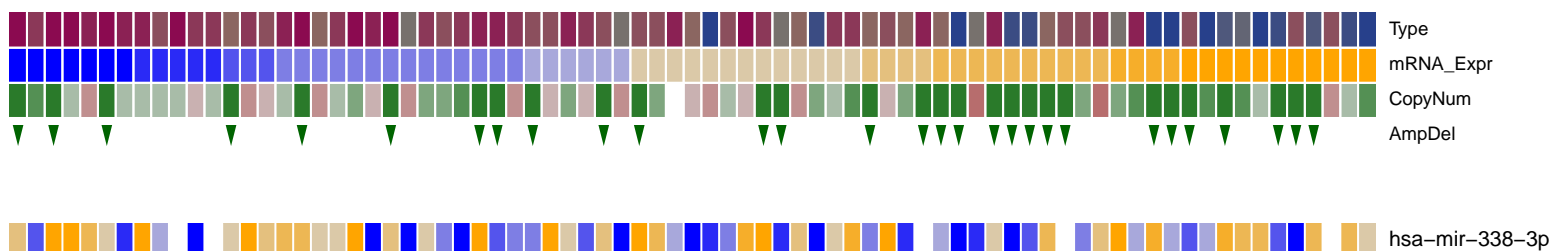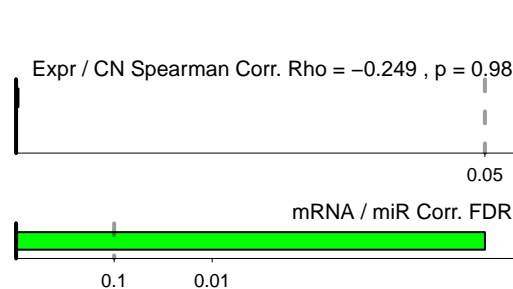

- 10 : 33626522
- 10 : 33626196
- 10 : 33625992
- 10 : 33624868
- 10 : 33624623
- 10 : 33624131
- 10 : 33624123
- 10 : 33624100
- 10 : 33623905
- 10 : 33623787
- 10 : 33623509
- 10 : 33623121
- 10 : 33622332
- 10 : 33619701
- 10 : 33612892
- 10 : 33604657
- 10 : 33594454
- 10 : 33590732
- 10 : 33578803
- 10 : 33568029
- 10 : 33562205
- 10 : 33553435
- 10 : 33542985
- 10 : 33527263
- 10 : 33524393
- 10 : 33518295
- 10 : 33515115
- 10 : 33512002
- 10 : 33485389
- 10 : 33483109
- 10 : 33468337

GeneLoc  
PromoterAssoc  
CpGIsland

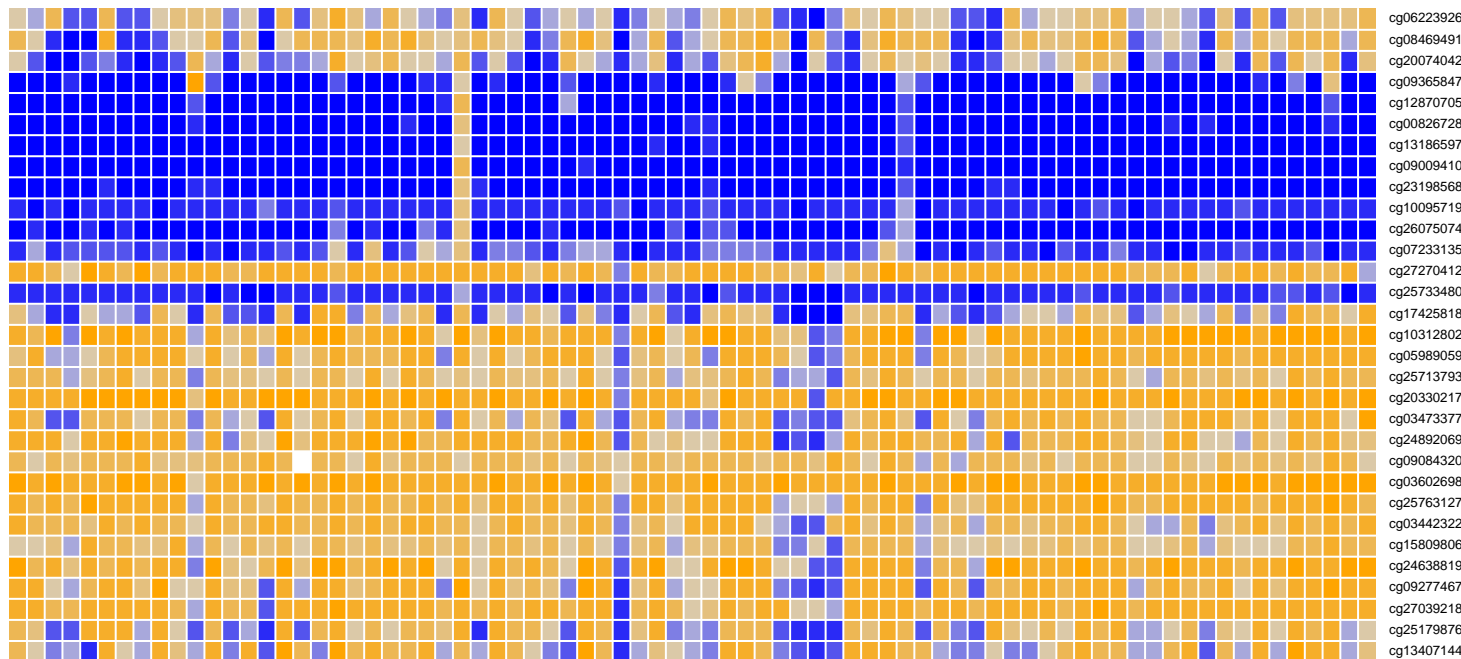

- cg06223926
- cg08469491
- cg20074042
- cg09365847
- cg12870705
- cg00826728
- cg13186597
- cg09009410
- cg23198568
- cg10095719
- cg26075074
- cg07233135
- cg27270412
- cg25733480
- cg17425818
- cg10312802
- cg05989059
- cg25713793
- cg20330217
- cg03473377
- cg24892069
- cg09084320
- cg03602698
- cg25763127
- cg03442322
- cg15809806
- cg24638819
- cg09277467
- cg27039218
- cg25179876
- cg13407144

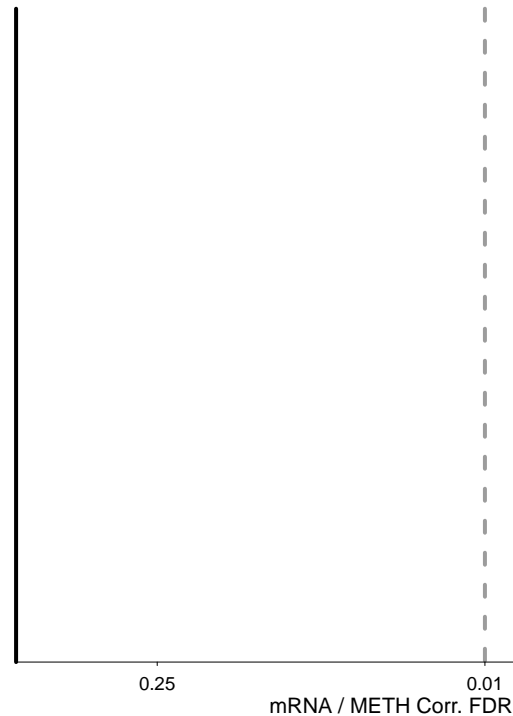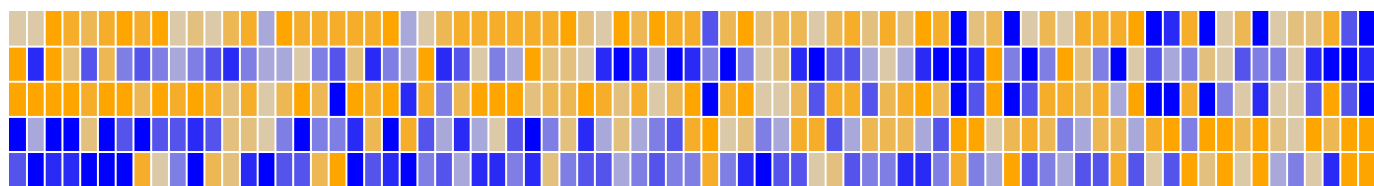

- MITF
- SOX10
- TRPM1
- ZEB1
- AXL

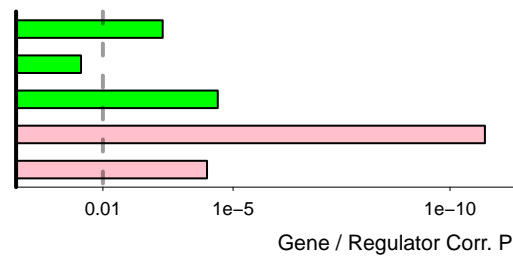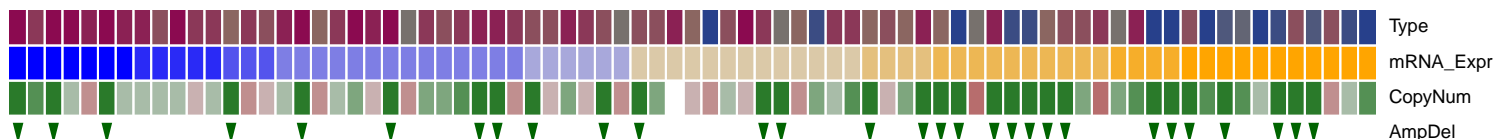

- TCGA-DA-A11A-06
- TCGA-W3-AA21-06
- TCGA-GN-A8LL-06
- TCGA-GN-A4U7-06
- TCGA-GN-A262-06
- TCGA-EE-A29L-06
- TCGA-ER-A3ES-06
- TCGA-EE-A29E-06
- TCGA-EP-A690-06
- TCGA-D3-A8GK-06
- TCGA-FS-A4F0-06
- TCGA-3N-A9WB-06
- TCGA-WE-A8JZ-06
- TCGA-D3-A5GL-06
- TCGA-D3-A8GV-06
- TCGA-EE-A2GR-06
- TCGA-EE-A185-06
- TCGA-D9-A6EC-06
- TCGA-D3-A3ML-06
- TCGA-GN-A6LK-06
- TCGA-FS-A1ZZ-06
- TCGA-FS-A1ZG-06
- TCGA-EE-A20C-06
- TCGA-FR-A8YD-06
- TCGA-DA-A95Z-06
- TCGA-EE-A3JI-06
- TCGA-EE-A3AD-06
- TCGA-GN-A268-06
- TCGA-RP-A695-06
- TCGA-EE-A17Z-06
- TCGA-ER-A19F-06
- TCGA-EE-A180-06
- TCGA-EE-A29B-06
- TCGA-DA-A95W-06
- TCGA-FW-A3I3-06
- TCGA-FR-A7U8-06
- TCGA-YG-AA3P-06
- TCGA-D3-A1QA-07
- TCGA-FS-A1YW-06
- TCGA-LH-A9OB-06
- TCGA-W3-A824-06
- TCGA-D3-A8GL-06
- TCGA-EE-A3AH-06
- TCGA-FS-A4FB-06
- TCGA-EE-A3T8-06
- TCGA-D3-A1QA-06
- TCGA-FS-A1ZK-06
- TCGA-FS-A4F5-06
- TCGA-FS-A1ZE-06
- TCGA-EE-A17E-06
- TCGA-D9-A6EG-06
- TCGA-FS-A1ZU-06
- TCGA-FS-A1ZC-06
- TCGA-D3-A3C6-06
- TCGA-FS-A1ZY-06
- TCGA-EE-A2MM-06
- TCGA-WE-A8ZQ-06
- TCGA-FS-A1Z3-06
- TCGA-D3-A8GI-06
- TCGA-D9-A1X3-06
- TCGA-EE-A29D-06
- TCGA-D3-A8GC-06
- TCGA-D9-A4Z6-06
- TCGA-EE-A20H-06
- TCGA-ER-A42K-06
- TCGA-D3-A1Q1-06
- TCGA-EE-A2A5-06
- TCGA-EE-A2A5-06
- TCGA-EE-A29A-06
- TCGA-D3-A3M0-06
- TCGA-FS-A1ZU-06
- TCGA-ER-A19L-06
- TCGA-FS-A4F9-06
- TCGA-WE-A8K6-06
- TCGA-EE-A2GO-06

# BASP1

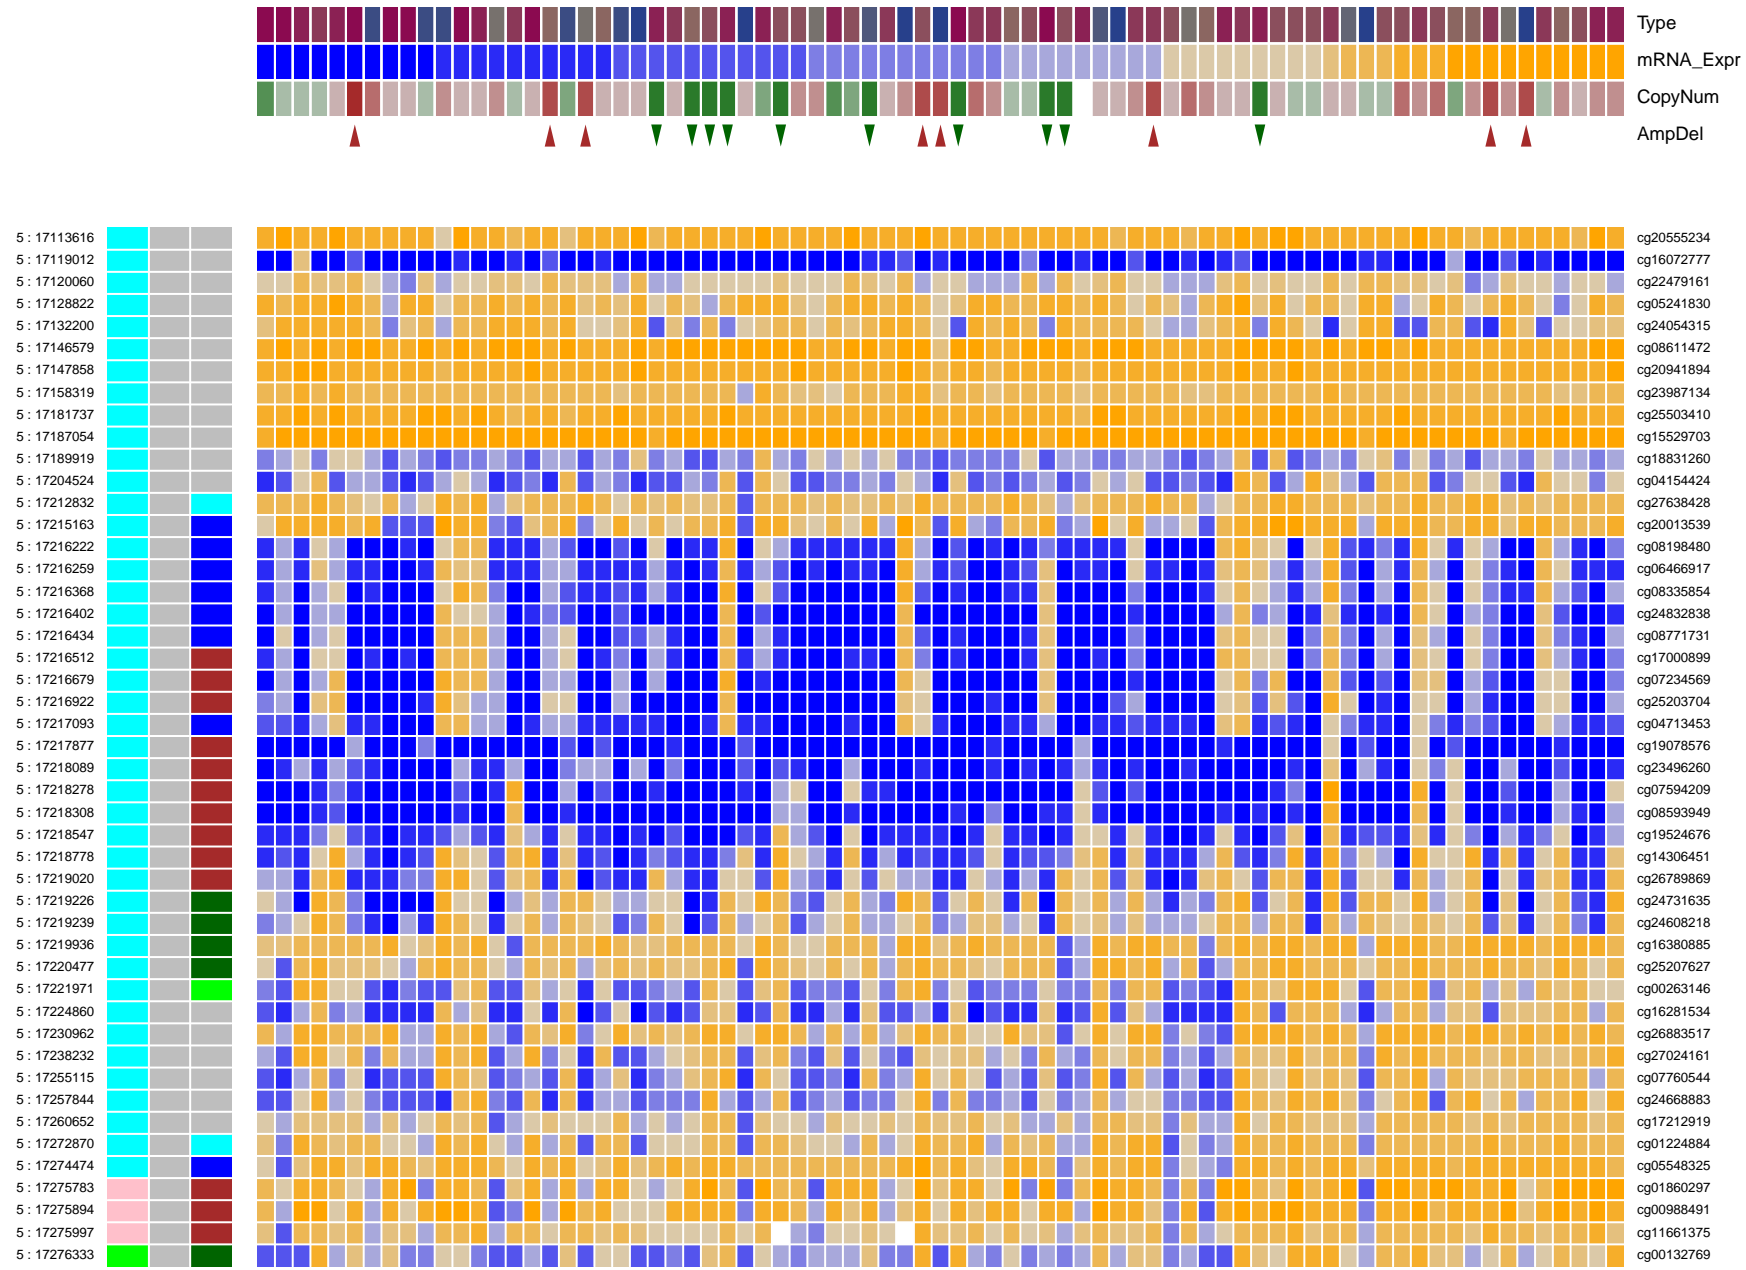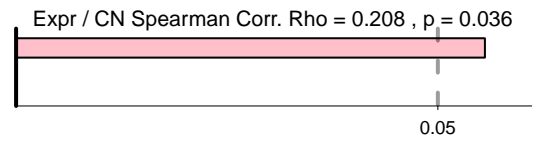

GeneLoc  
PromoterAssoc  
CpGIsland

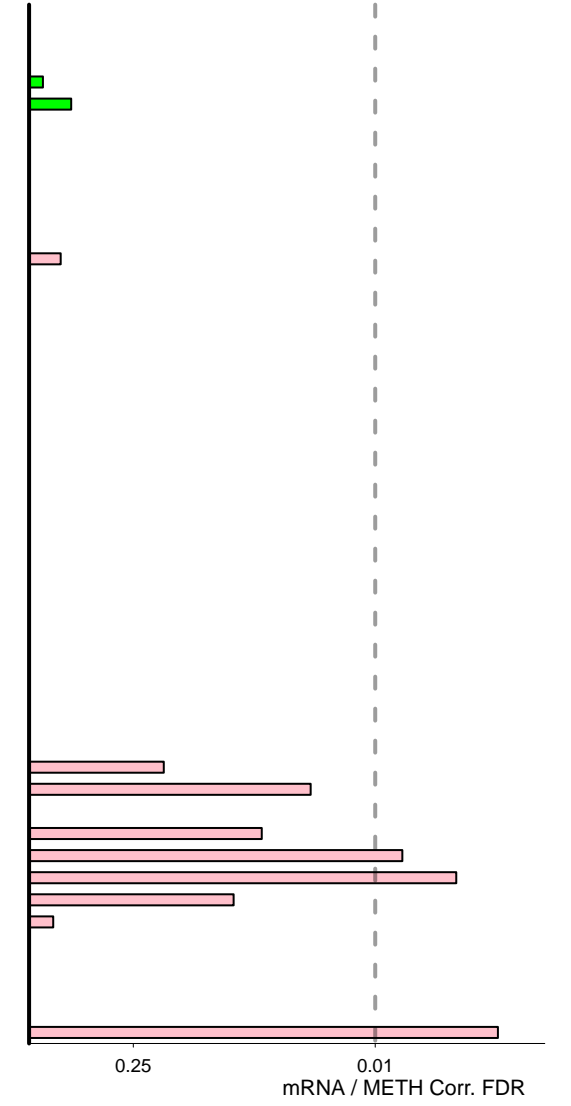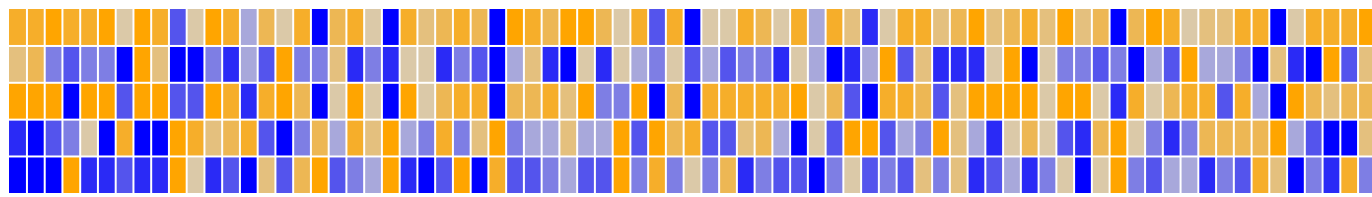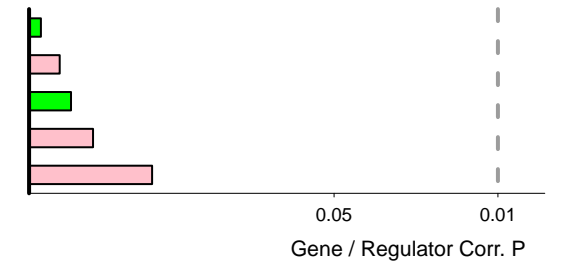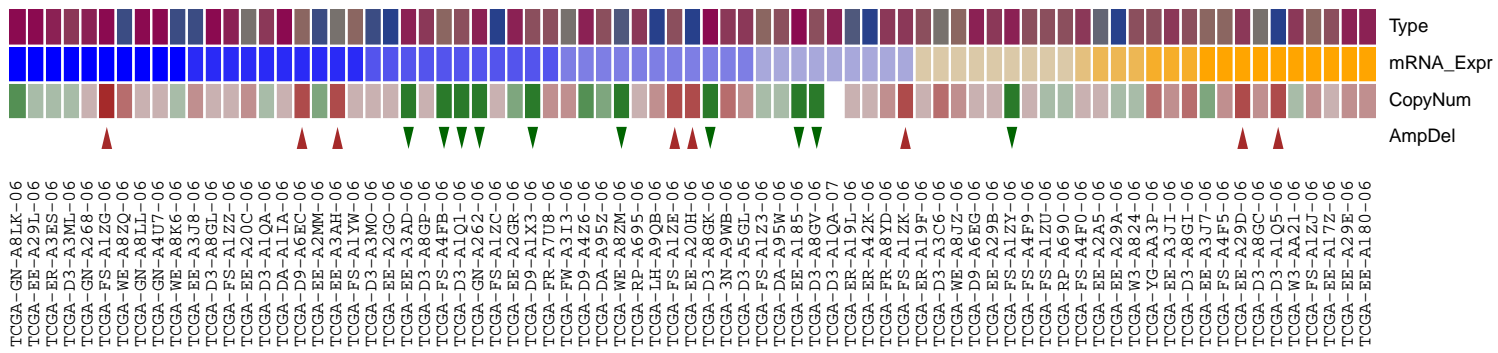

TCGA-GN-A8LK-06  
TCGA-EE-A29L-06  
TCGA-ER-A3ES-06  
TCGA-D3-A3ML-06  
TCGA-GN-A268-06  
TCGA-FS-A1ZG-06  
TCGA-WE-A8ZQ-06  
TCGA-GN-A8LL-06  
TCGA-GN-A4U7-06  
TCGA-WE-A8K6-06  
TCGA-EE-A3J8-06  
TCGA-D3-A8GL-06  
TCGA-FS-A1ZZ-06  
TCGA-EE-A2OC-06  
TCGA-D3-A1QA-06  
TCGA-DA-A1YA-06  
TCGA-D9-A6FC-06  
TCGA-EE-A2NM-06  
TCGA-EE-A3AH-06  
TCGA-FS-A1YW-06  
TCGA-D3-A3MO-06  
TCGA-EE-A2GO-06  
TCGA-EE-A3AD-06  
TCGA-D3-A8GP-06  
TCGA-FS-A4FB-06  
TCGA-D3-A1Q1-06  
TCGA-GN-A262-06  
TCGA-FS-A1ZC-06  
TCGA-EE-A2GR-06  
TCGA-D9-A1X3-06  
TCGA-FR-A7U8-06  
TCGA-FW-A3I3-06  
TCGA-D9-A4Z6-06  
TCGA-DA-A95Z-06  
TCGA-WE-A8ZM-06  
TCGA-RP-A695-06  
TCGA-LH-A9OB-06  
TCGA-FS-A1ZE-06  
TCGA-EE-A2OH-06  
TCGA-D3-A8GK-06  
TCGA-3N-A9WB-06  
TCGA-D3-A5GL-06  
TCGA-FS-A1Z3-06  
TCGA-DA-A95W-06  
TCGA-EE-A185-06  
TCGA-D3-A8GV-06  
TCGA-D3-A1QA-07  
TCGA-ER-A18L-06  
TCGA-FR-A4ZK-06  
TCGA-FS-A1YK-06  
TCGA-ER-A1YK-06  
TCGA-FS-A1YK-06  
TCGA-ER-A1YK-06  
TCGA-EE-A3CG-06  
TCGA-WE-A8JZ-06  
TCGA-D9-A6EG-06  
TCGA-EE-A2PB-06  
TCGA-FS-A1ZY-06  
TCGA-FS-A4F9-06  
TCGA-FS-A1ZU-06  
TCGA-RP-A690-06  
TCGA-FS-A4F0-06  
TCGA-EE-A2A5-06  
TCGA-EE-A29A-06  
TCGA-W3-A8Z4-06  
TCGA-YG-AA3P-06  
TCGA-EE-A3JI-06  
TCGA-D3-A8GI-06  
TCGA-EE-A3J7-06  
TCGA-FS-A4F5-06  
TCGA-EE-A29D-06  
TCGA-D3-A8GC-06  
TCGA-D3-A1O5-06  
TCGA-W3-AA21-06  
TCGA-FS-A1ZJ-06  
TCGA-EE-A17Z-06  
TCGA-EE-A29E-06  
TCGA-EE-A180-06

# TMEM200A

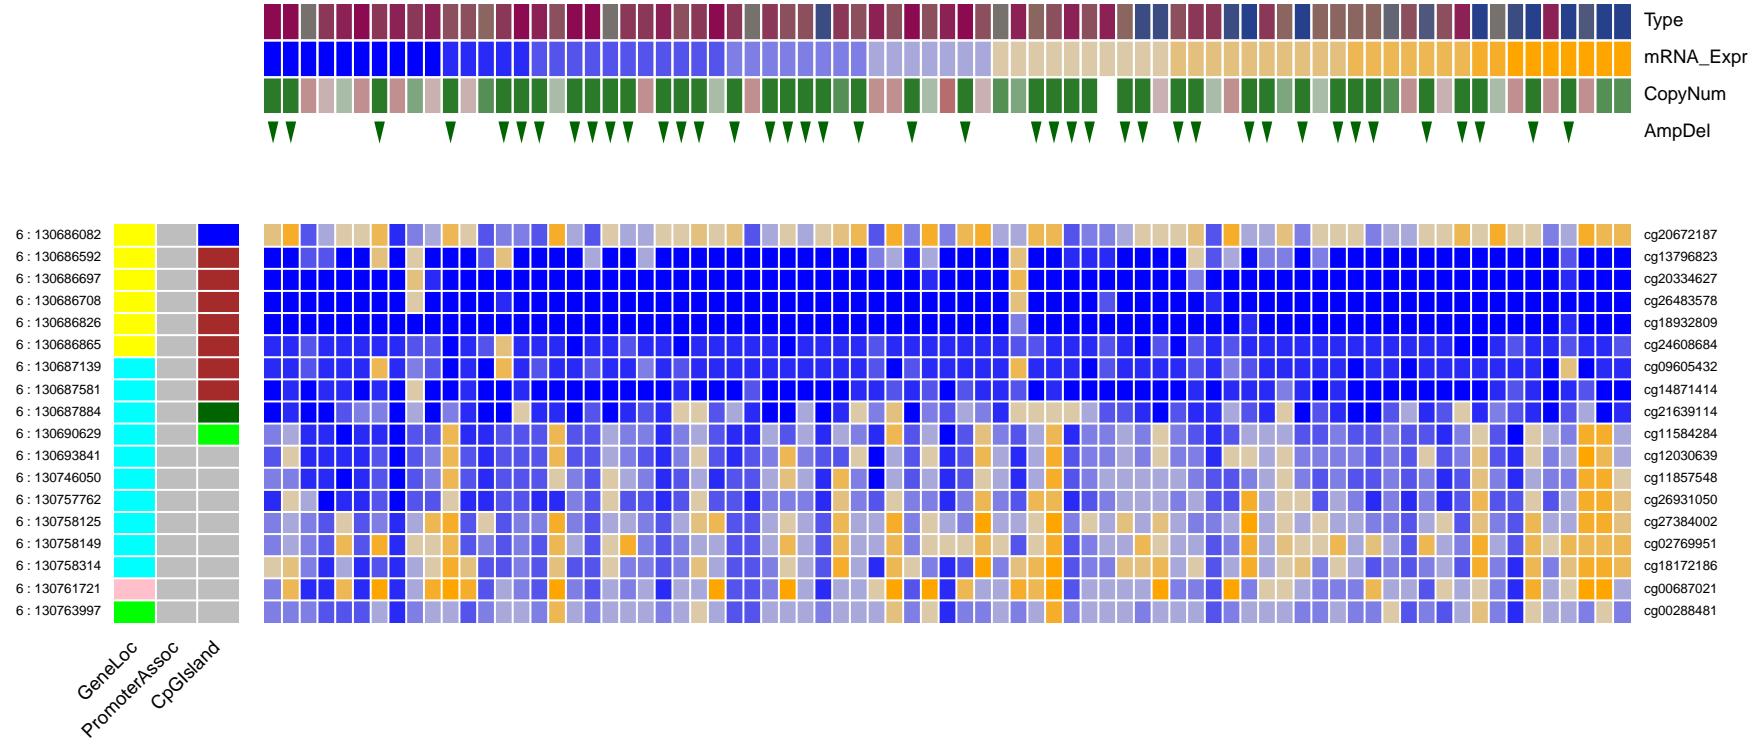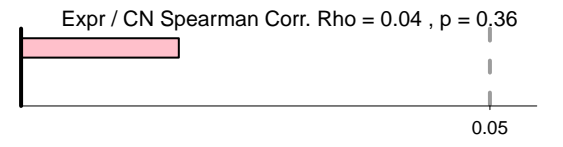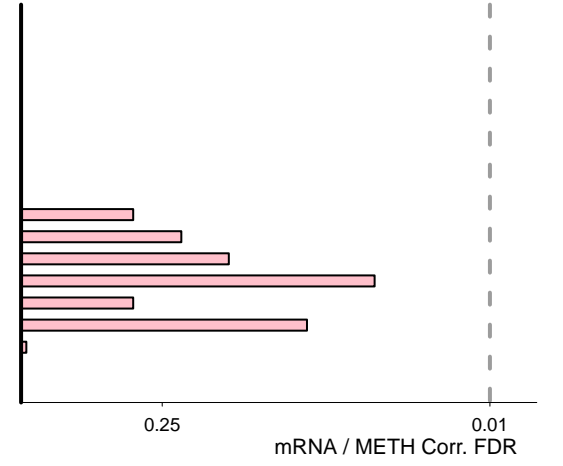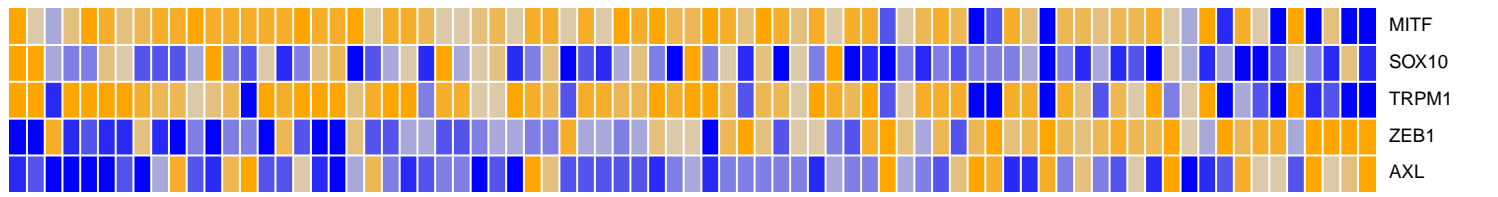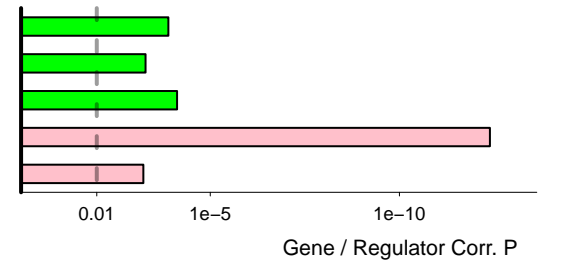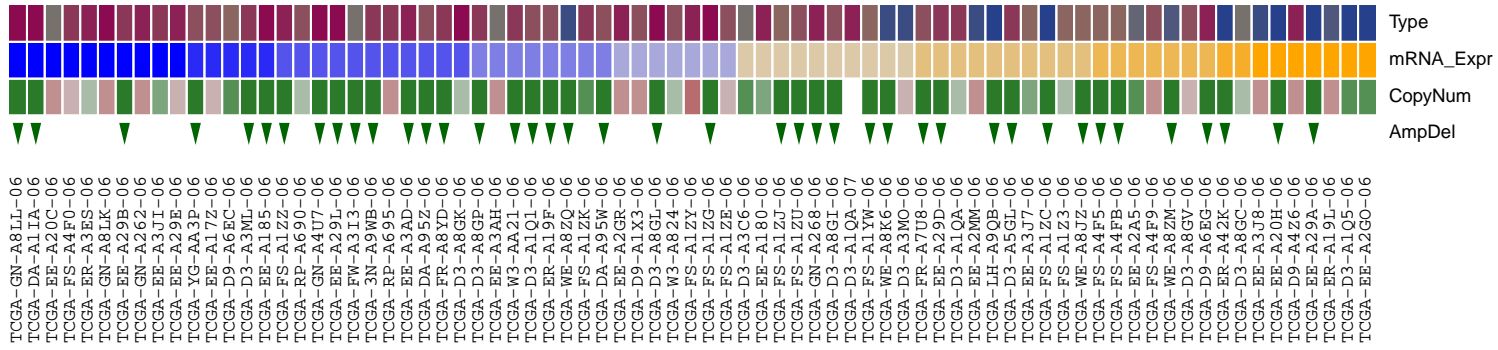

# LOXL2

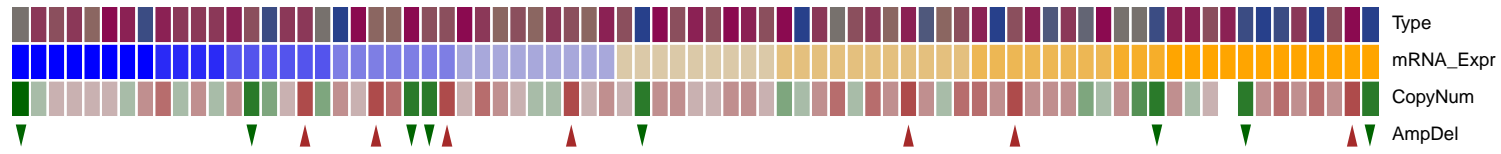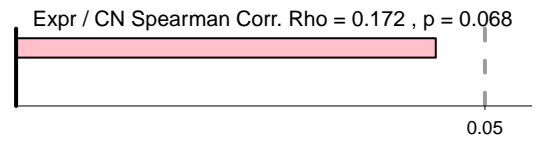

8 : 23268041  
 8 : 23262159  
 8 : 23262073  
 8 : 23261967  
 8 : 23261918  
 8 : 23261738  
 8 : 23261731  
 8 : 23261720  
 8 : 23261622  
 8 : 23261618  
 8 : 23261312  
 8 : 23261117  
 8 : 23260961  
 8 : 23260443  
 8 : 23256732  
 8 : 23239266  
 8 : 23225606  
 8 : 23211349  
 8 : 23201488  
 8 : 23193704  
 8 : 23167318  
 8 : 23167206  
 8 : 23162383  
 8 : 23162295  
 8 : 23162162  
 8 : 23161764

GeneLoc  
 PromoterAssoc  
 CpGIsland

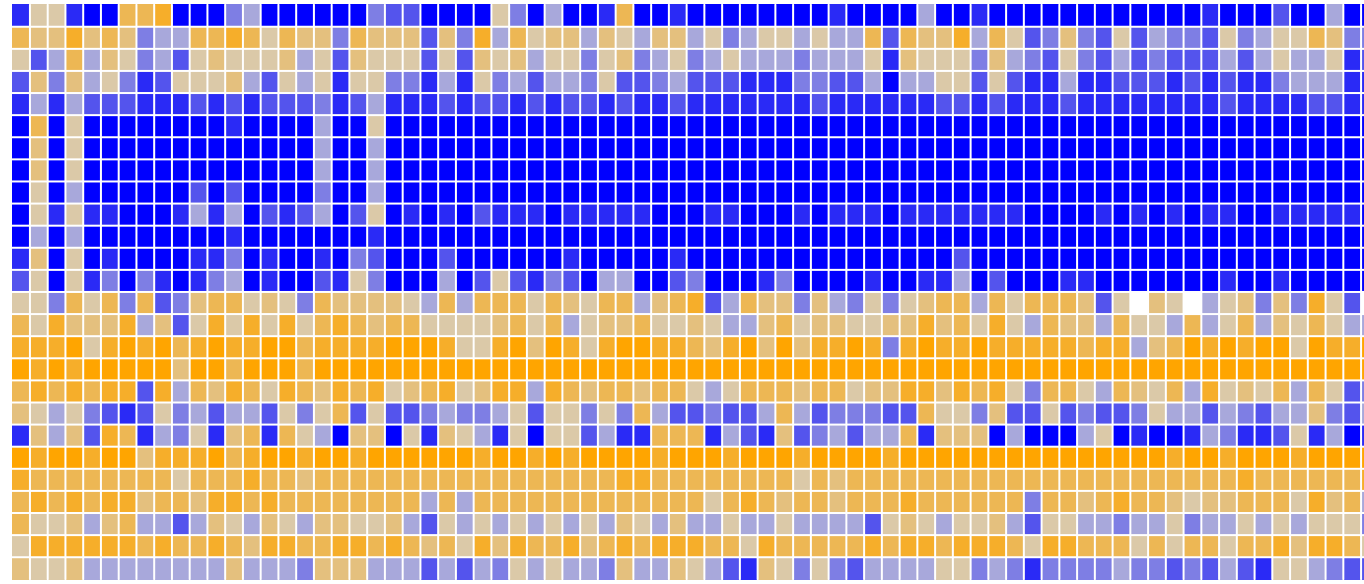

cg11041161  
 cg04259752  
 cg05365729  
 cg13531748  
 cg02183676  
 cg26506507  
 cg26563553  
 cg07352539  
 cg25074071  
 cg00558156  
 cg03664800  
 cg22969112  
 cg18233786  
 cg09042448  
 cg10090386  
 cg17571992  
 cg06768079  
 cg24911388  
 cg04028450  
 cg09535960  
 cg17804498  
 cg21397592  
 cg16661761  
 cg07396746  
 cg24531534  
 cg07963670

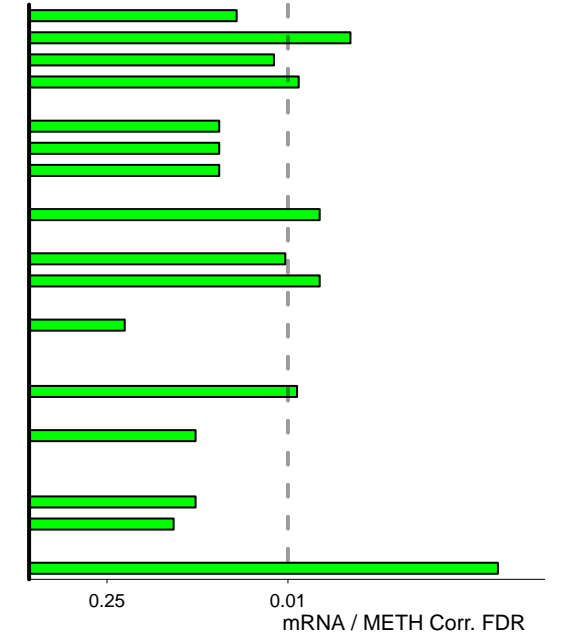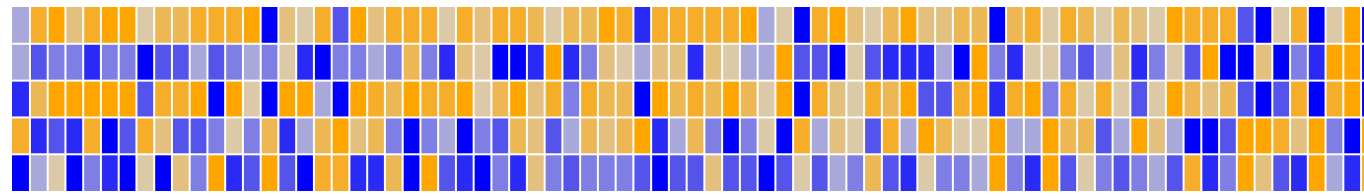

MITF  
 SOX10  
 TRPM1  
 ZEB1  
 AXL

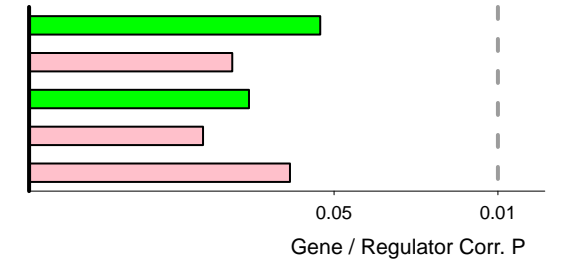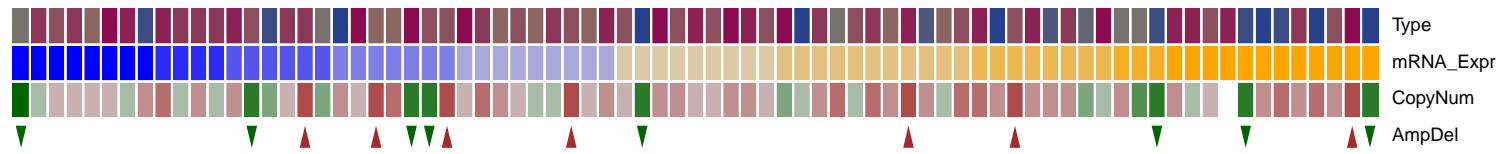

TCGA-EE-A20C-06  
 TCGA-EE-A3JI-06  
 TCGA-RP-A690-06  
 TCGA-FS-A4FO-06  
 TCGA-FS-A1YW-06  
 TCGA-FS-A1ZG-06  
 TCGA-ER-A3ES-06  
 TCGA-EE-A3J8-06  
 TCGA-GN-A262-06  
 TCGA-D3-A1QA-06  
 TCGA-RP-A695-06  
 TCGA-D3-A3MT-06  
 TCGA-GN-A268-06  
 TCGA-YG-A33P-06  
 TCGA-EE-A2MM-06  
 TCGA-EE-A29F-06  
 TCGA-W3-A321-06  
 TCGA-D3-A8GC-06  
 TCGA-LH-A8QB-06  
 TCGA-D3-A8GL-06  
 TCGA-EE-A3U7-06  
 TCGA-D9-A6EC-06  
 TCGA-EE-A29L-06  
 TCGA-D3-A1Q1-06  
 TCGA-DA-A95W-06  
 TCGA-GN-A4U7-06  
 TCGA-D3-A8GP-06  
 TCGA-FS-A1ZJ-06  
 TCGA-FS-A4F9-06  
 TCGA-WE-A8JZ-06  
 TCGA-FR-A8YD-06  
 TCGA-DA-A95Z-06  
 TCGA-FS-A1Z3-06  
 TCGA-EE-A180-06  
 TCGA-FS-A1ZE-06  
 TCGA-ER-A42K-06  
 TCGA-GN-A8LK-06  
 TCGA-D9-A1X3-06  
 TCGA-FS-A1ZZ-06  
 TCGA-ER-A19F-06  
 TCGA-EE-A185-06  
 TCGA-EE-A2GR-06  
 TCGA-D3-A8GV-06  
 TCGA-DA-A1JA-06  
 TCGA-EE-A20H-06  
 TCGA-FS-A1ZK-06  
 TCGA-FW-A3I3-06  
 TCGA-FS-A1ZU-06  
 TCGA-3N-A9WB-06  
 TCGA-FS-A4EB-06  
 TCGA-D9-A6EG-06  
 TCGA-ER-A19L-06  
 TCGA-FS-A4F5-06  
 TCGA-W3-A824-06  
 TCGA-FS-A1Z1-06  
 TCGA-EE-A29A-06  
 TCGA-FR-A7U8-06  
 TCGA-EE-A3AD-06  
 TCGA-WE-A8ZM-06  
 TCGA-EE-A29D-06  
 TCGA-EE-A2A5-06  
 TCGA-D3-A8GK-06  
 TCGA-EE-A3AH-06  
 TCGA-D3-A3C6-06  
 TCGA-D3-A4Z6-06  
 TCGA-EE-A29E-06  
 TCGA-EE-A17Z-06  
 TCGA-D3-A1QA-07  
 TCGA-WE-A8K6-06  
 TCGA-D3-A1Q5-06  
 TCGA-WE-A8ZO-06  
 TCGA-D3-A5GL-06  
 TCGA-EE-A2GO-06  
 TCGA-D3-A8GI-06  
 TCGA-GN-A8LI-06  
 TCGA-FS-A1ZC-06

# CRIM1

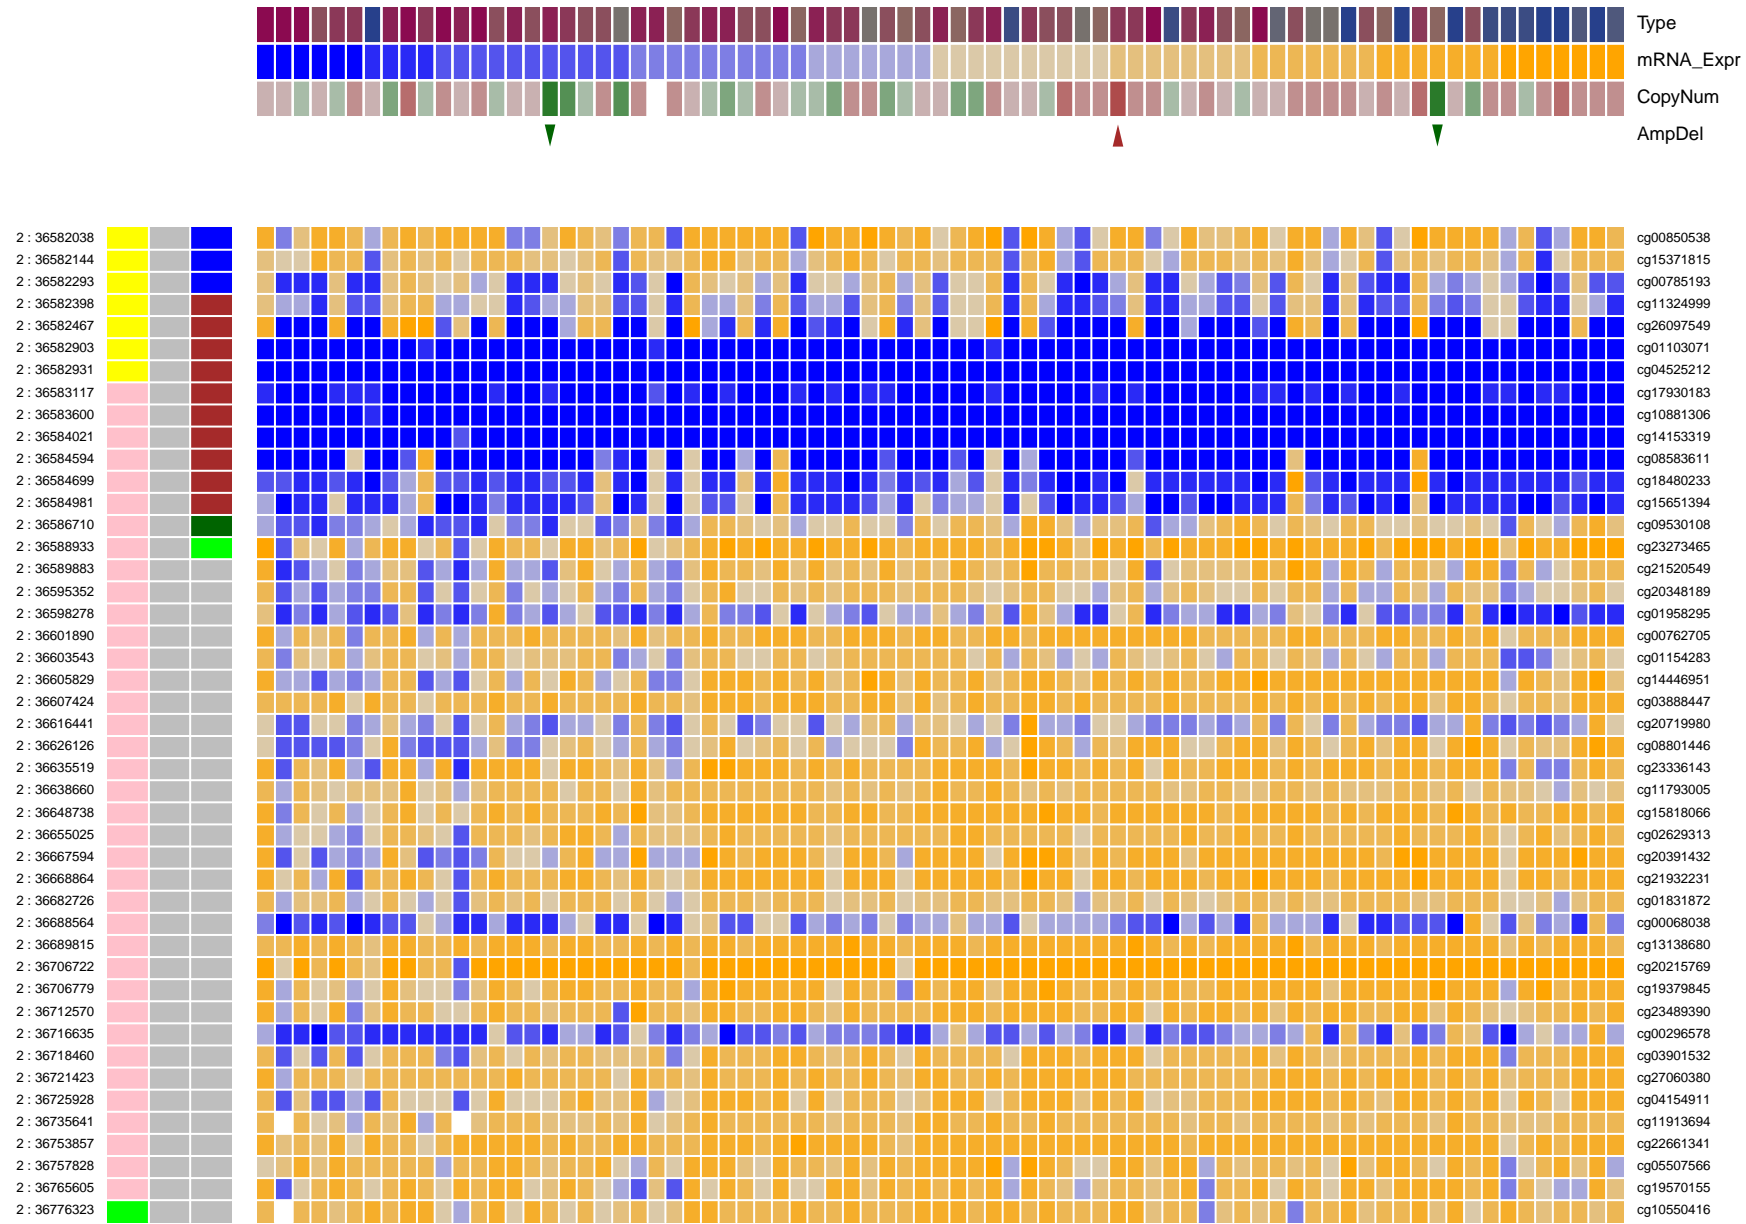

GeneLoc  
PromoterAssoc  
CpGIsland

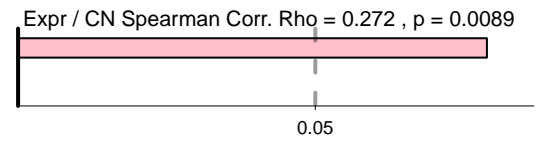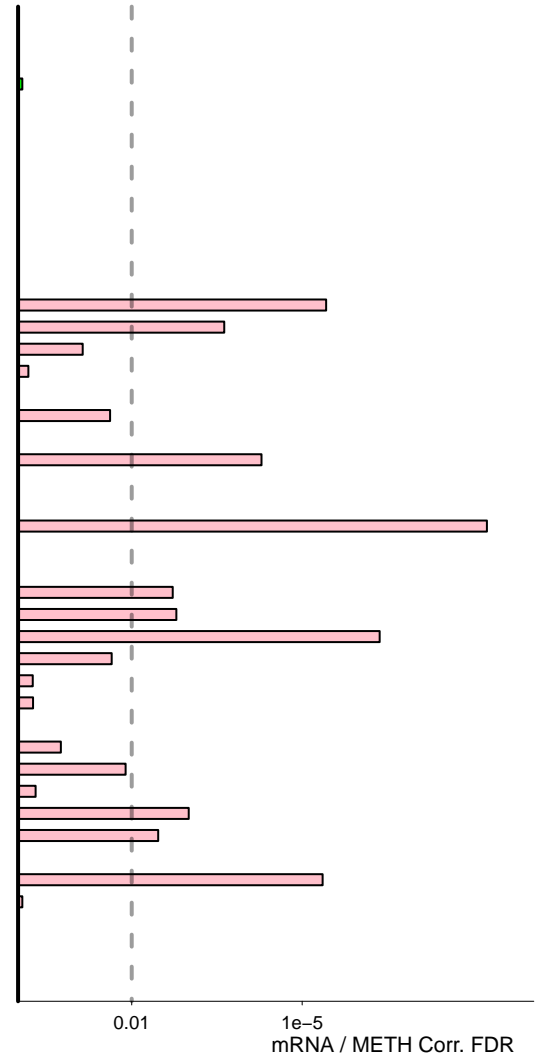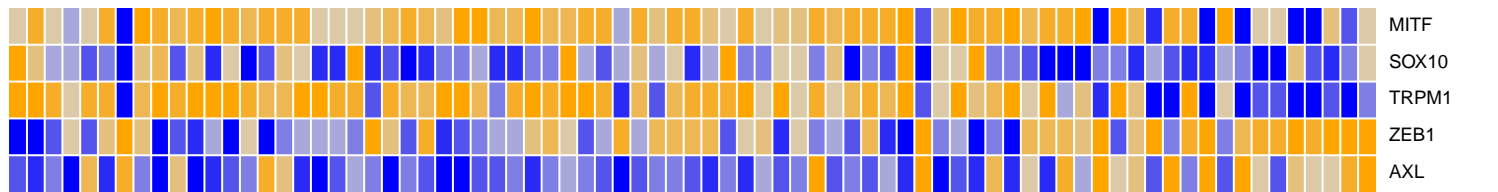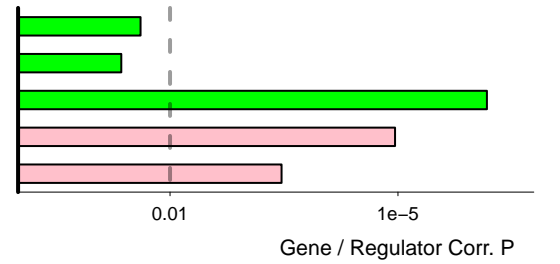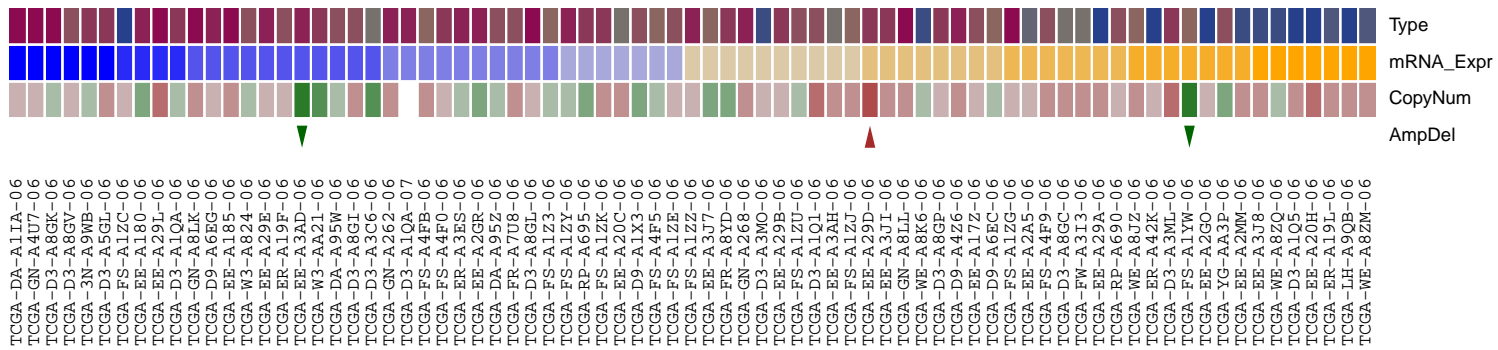

TCGA-DA-A11A-06  
TCGA-GN-A4U7-06  
TCGA-D3-A8GK-06  
TCGA-D3-A8GV-06  
TCGA-3N-A9WB-06  
TCGA-D3-A5GL-06  
TCGA-FS-A1ZC-06  
TCGA-EE-A180-06  
TCGA-EE-A29L-06  
TCGA-D3-A1QA-06  
TCGA-GN-A8LK-06  
TCGA-D9-A6EG-06  
TCGA-EE-A185-06  
TCGA-W3-A824-06  
TCGA-EE-A29E-06  
TCGA-EE-A19F-06  
TCGA-EE-A3AD-06  
TCGA-W3-A82L-06  
TCGA-DA-A85W-06  
TCGA-D3-A6GI-06  
TCGA-D3-A3C6-06  
TCGA-GN-A262-06  
TCGA-D3-A1QA-07  
TCGA-FS-A4FB-06  
TCGA-FS-A4F0-06  
TCGA-EE-A3ES-06  
TCGA-EE-A2GR-06  
TCGA-DA-A95Z-06  
TCGA-FR-A7U8-06  
TCGA-D3-A8GL-06  
TCGA-FS-A1Z3-06  
TCGA-RP-A695-06  
TCGA-FS-A1ZY-06  
TCGA-FS-A1ZK-06  
TCGA-EE-A20C-06  
TCGA-D9-A1X3-06  
TCGA-FS-A4F5-06  
TCGA-FS-A1ZE-06  
TCGA-FS-A1ZZ-06  
TCGA-EE-A3J7-06  
TCGA-FR-A8YD-06  
TCGA-GN-A268-06  
TCGA-D3-A3MO-06  
TCGA-EE-A29B-06  
TCGA-FS-A1ZU-06  
TCGA-EE-A1Q1-06  
TCGA-D3-A3AH-06  
TCGA-FS-A1ZI-06  
TCGA-EE-A29D-06  
TCGA-EE-A3TI-06  
TCGA-GN-A8LL-06  
TCGA-WE-A8K6-06  
TCGA-D3-A6GP-06  
TCGA-D9-A4Z6-06  
TCGA-EE-A17Z-06  
TCGA-D9-A6EC-06  
TCGA-FS-A1ZG-06  
TCGA-EE-A245-06  
TCGA-FS-A4F9-06  
TCGA-D3-A8GC-06  
TCGA-FW-A3I3-06  
TCGA-EE-A29A-06  
TCGA-RP-A690-06  
TCGA-WE-A8JZ-06  
TCGA-EE-A42K-06  
TCGA-D3-A3ML-06  
TCGA-FS-A1YW-06  
TCGA-EE-A2GO-06  
TCGA-YG-AA3P-06  
TCGA-EE-A2MM-06  
TCGA-EE-A3J8-06  
TCGA-WE-A8ZQ-06  
TCGA-D3-A1O5-06  
TCGA-EE-A20H-06  
TCGA-EE-A19L-06  
TCGA-LH-A9QB-06  
TCGA-WE-A82M-06



# ANTXR2

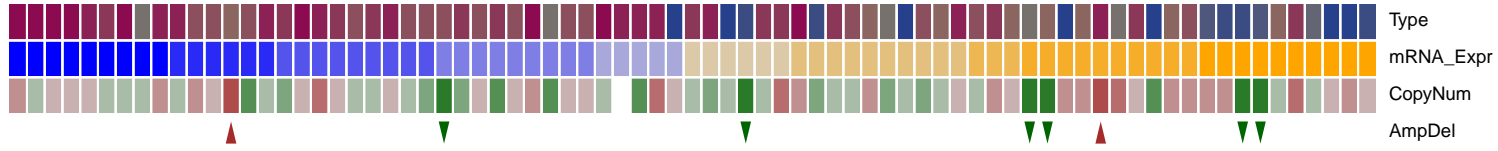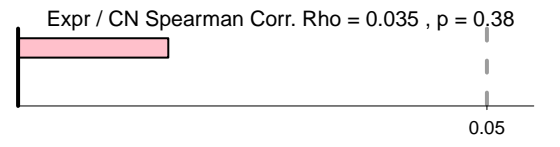

4 : 81047158  
 4 : 80994605  
 4 : 80994550  
 4 : 80994480  
 4 : 80994409  
 4 : 80994271  
 4 : 80994236  
 4 : 80993819  
 4 : 80993552  
 4 : 80992999  
 4 : 80991289  
 4 : 80977666  
 4 : 80977132  
 4 : 80933006  
 4 : 80886264  
 4 : 80886143  
 4 : 80885981  
 4 : 80885348  
 4 : 80885279  
 4 : 80883595  
 4 : 80869858  
 4 : 80836552  
 4 : 80832187

GeneLoc  
 PromoterAssoc  
 CpGIsland

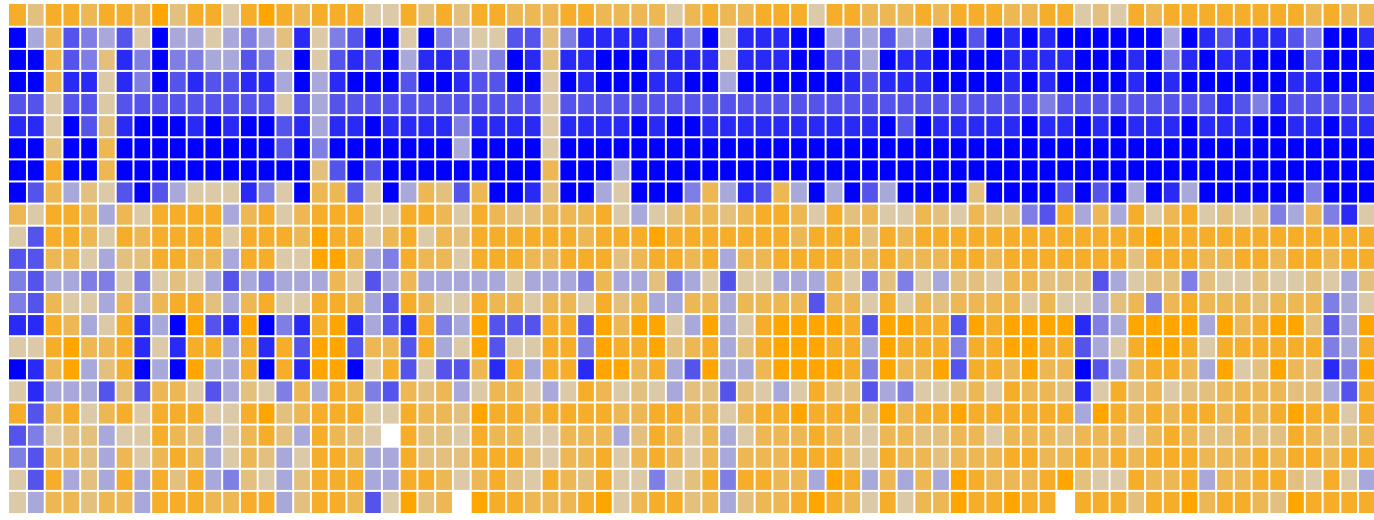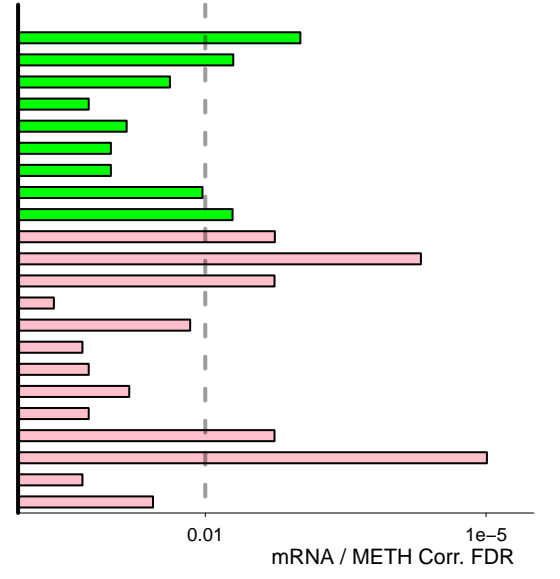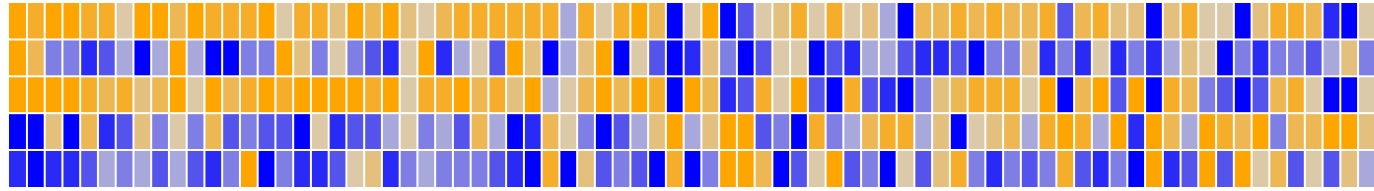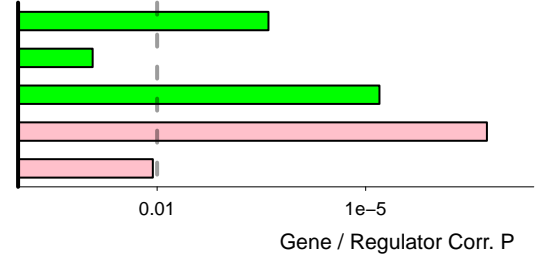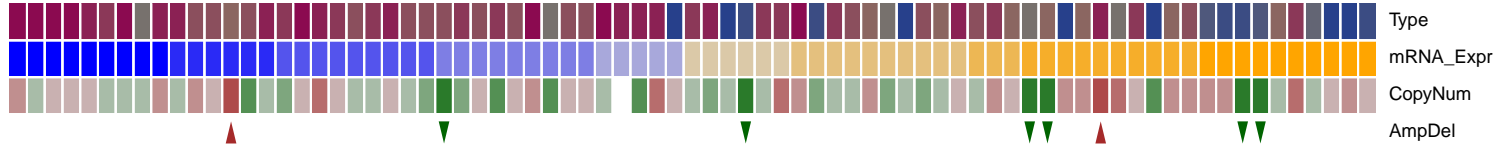

TCGA-GN-A8LL-06  
 TCGA-EE-A29L-06  
 TCGA-D3-A8GL-06  
 TCGA-FS-A1ZG-06  
 TCGA-FS-A1ZZ-06  
 TCGA-EE-A3JI-06  
 TCGA-D3-A8GK-06  
 TCGA-FW-A3I3-06  
 TCGA-EE-A2GR-06  
 TCGA-FS-A1ZY-06  
 TCGA-YG-AA3P-06  
 TCGA-FS-AA3P-06  
 TCGA-FS-A1ZJ-06  
 TCGA-D3-A1O1-06  
 TCGA-ER-A3FS-06  
 TCGA-FR-A8YD-06  
 TCGA-GN-A4H7-06  
 TCGA-GN-A2S8-06  
 TCGA-EE-A29S-06  
 TCGA-EP-A69U-06  
 TCGA-D3-A1QA-06  
 TCGA-D9-A6EG-06  
 TCGA-FS-A1ZU-06  
 TCGA-D3-A8GI-06  
 TCGA-FR-A7U8-06  
 TCGA-RP-A69S-06  
 TCGA-FS-A1ZE-06  
 TCGA-FS-A1ZK-06  
 TCGA-EE-A17Z-06  
 TCGA-GN-A8LK-06  
 TCGA-D3-A8GC-06  
 TCGA-D3-A8GV-06  
 TCGA-ER-A19F-06  
 TCGA-DA-A1IA-06  
 TCGA-D3-A1QA-07  
 TCGA-D9-A4Z6-06  
 TCGA-GN-A26Z-06  
 TCGA-FS-A1ZC-06  
 TCGA-W3-AA21-06  
 TCGA-EE-A180-06  
 TCGA-EE-A29A-06  
 TCGA-WE-A8K6-06  
 TCGA-3N-A9WB-06  
 TCGA-D3-A8GP-06  
 TCGA-EE-A185-06  
 TCGA-EE-A3J8-06  
 TCGA-D3-A3MI-06  
 TCGA-DA-A95W-06  
 TCGA-FS-A4FE-06  
 TCGA-EE-A20C-06  
 TCGA-EE-A20H-06  
 TCGA-DA-A9SZ-06  
 TCGA-WE-A8JZ-06  
 TCGA-EE-A29F-06  
 TCGA-W3-A8Z4-06  
 TCGA-D3-A5GL-06  
 TCGA-FS-A1Z3-06  
 TCGA-EE-A3AH-06  
 TCGA-FS-A1YW-06  
 TCGA-LH-A9QB-06  
 TCGA-FS-A4FB-06  
 TCGA-EE-A3AD-06  
 TCGA-D3-A3C6-06  
 TCGA-FS-A4F0-06  
 TCGA-EE-A26O-06  
 TCGA-EE-A3J7-06  
 TCGA-D9-A1X3-06  
 TCGA-WE-A8ZM-06  
 TCGA-WE-A8ZQ-06  
 TCGA-EE-A2MM-06  
 TCGA-ER-A19L-06  
 TCGA-D9-A6EC-06  
 TCGA-EE-A29D-06  
 TCGA-EE-A2A5-06  
 TCGA-ER-A42K-06  
 TCGA-D3-A1O5-06  
 TCGA-D3-A3MO-06

# KCNMA1

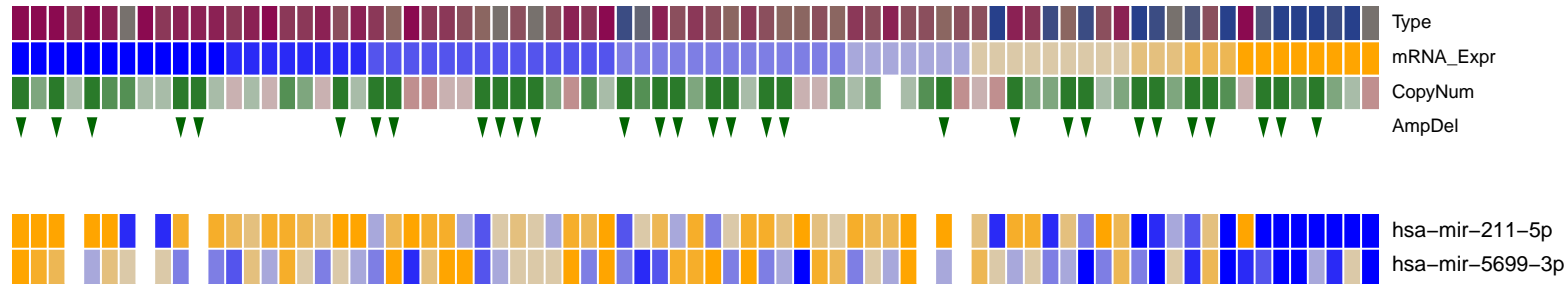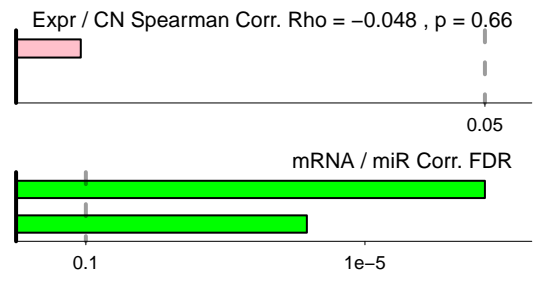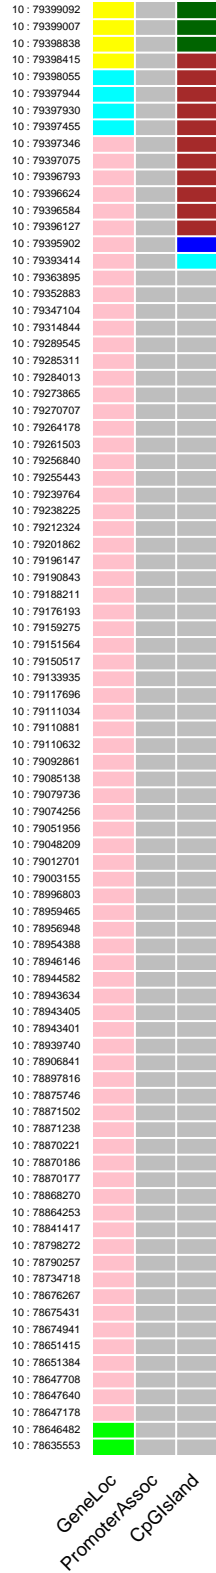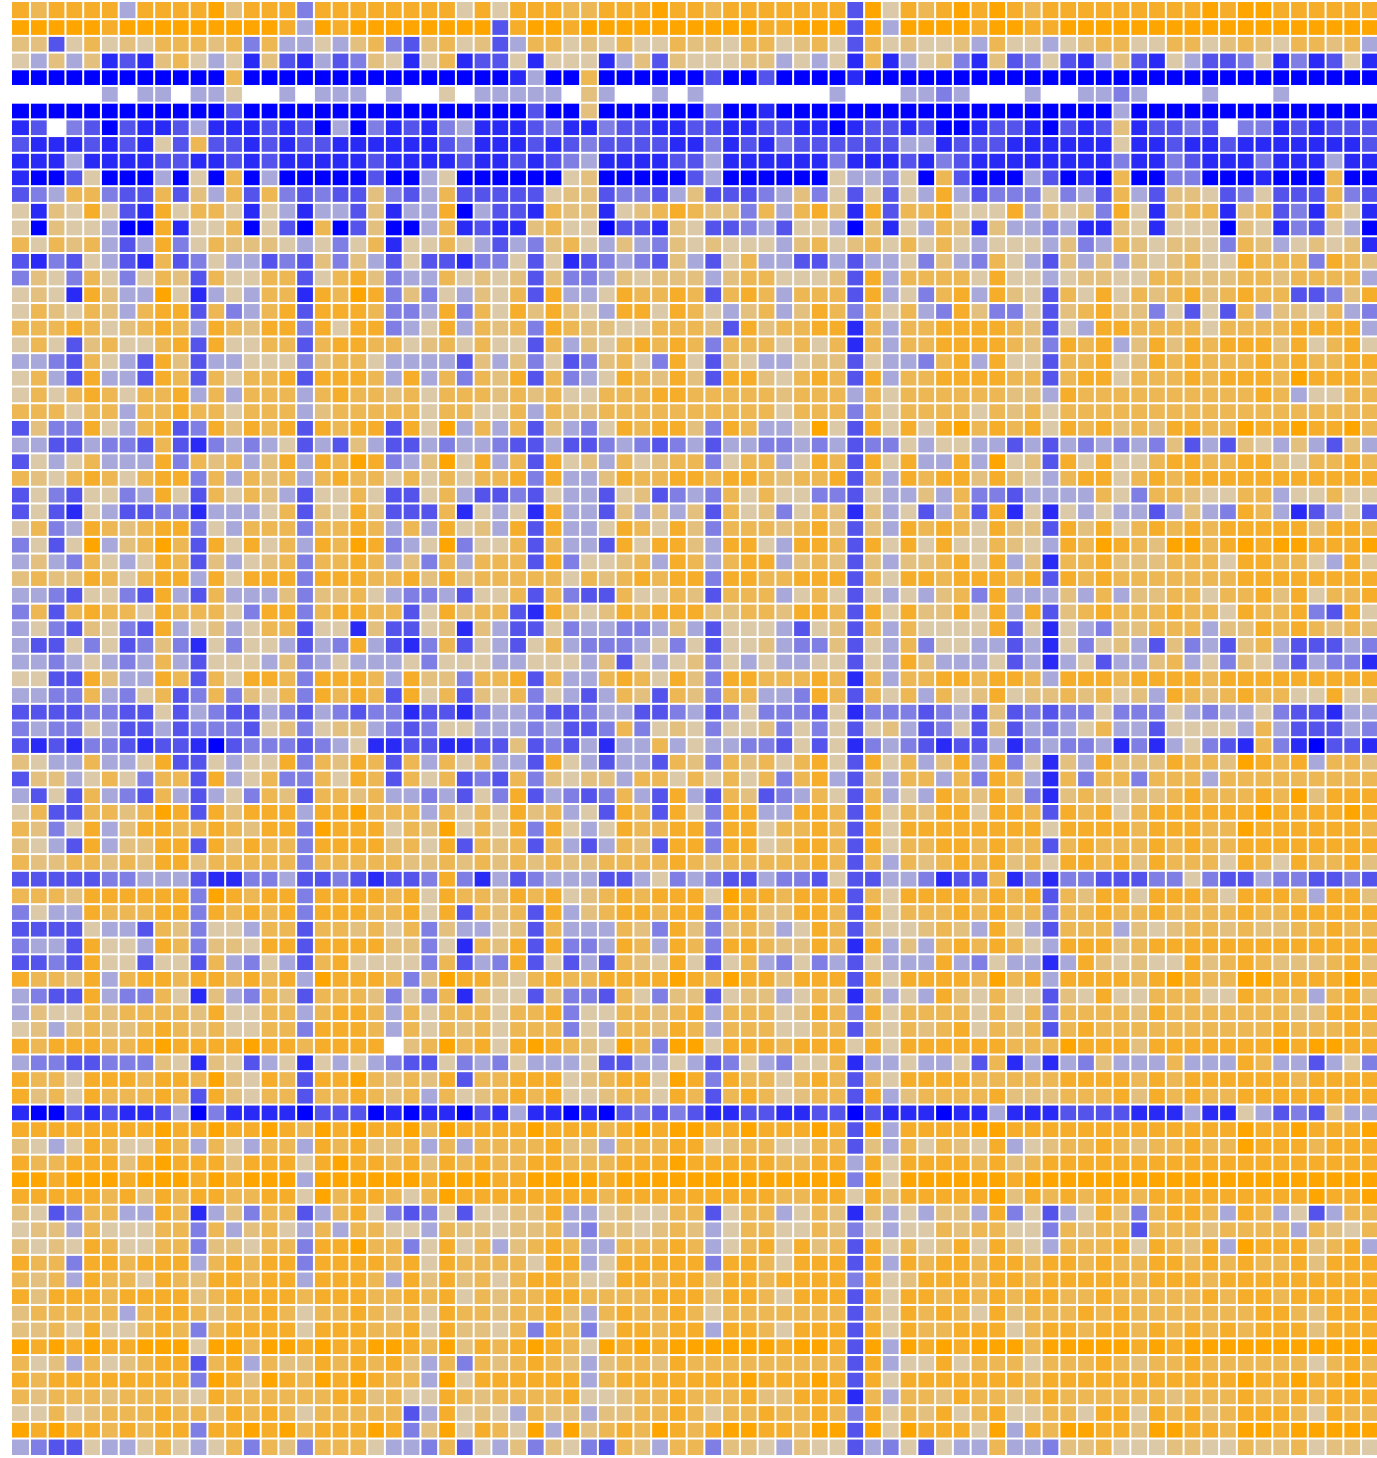

cg10238051  
cg08252303  
cg11928896  
cg09512236  
cg24113782  
cg05754819  
cg25655799  
cg09405661  
cg04688368  
cg05433039  
cg03354113  
cg05479582  
cg01858517  
cg00171421  
cg06045319  
cg26611809  
cg15863827  
cg17758048  
cg26615853  
cg00083188  
cg26442890  
cg15200789  
cg02727484  
cg03299991  
cg05058846  
cg18738985  
cg02172819  
cg09837995  
cg00566688  
cg17786129  
cg06828335  
cg18659450  
cg14956836  
cg26353166  
cg25932315  
cg02499967  
cg05785932  
cg22796248  
cg060503017  
cg16055185  
cg12614113  
cg00981146  
cg12383650  
cg04308589  
cg19072848  
cg19682340  
cg20227530  
cg19730814  
cg23545872  
cg25381229  
cg26225421  
cg16178003  
cg06144361  
cg07029975  
cg00404436  
cg04912778  
cg26091990  
cg19273378  
cg16054184  
cg07464125  
cg07210187  
cg19027255  
cg03109729  
cg23107301  
cg27426045  
cg27465618  
cg18507365  
cg05907577  
cg05908691  
cg19346281  
cg07972159  
cg20107824  
cg15754112  
cg02614428  
cg18094423  
cg19427642  
cg22732603  
cg10938336  
cg14816861  
cg27623266  
cg14194367  
cg25518362  
cg07528661  
cg00986133  
cg11532418  
cg02089185  
cg23533270

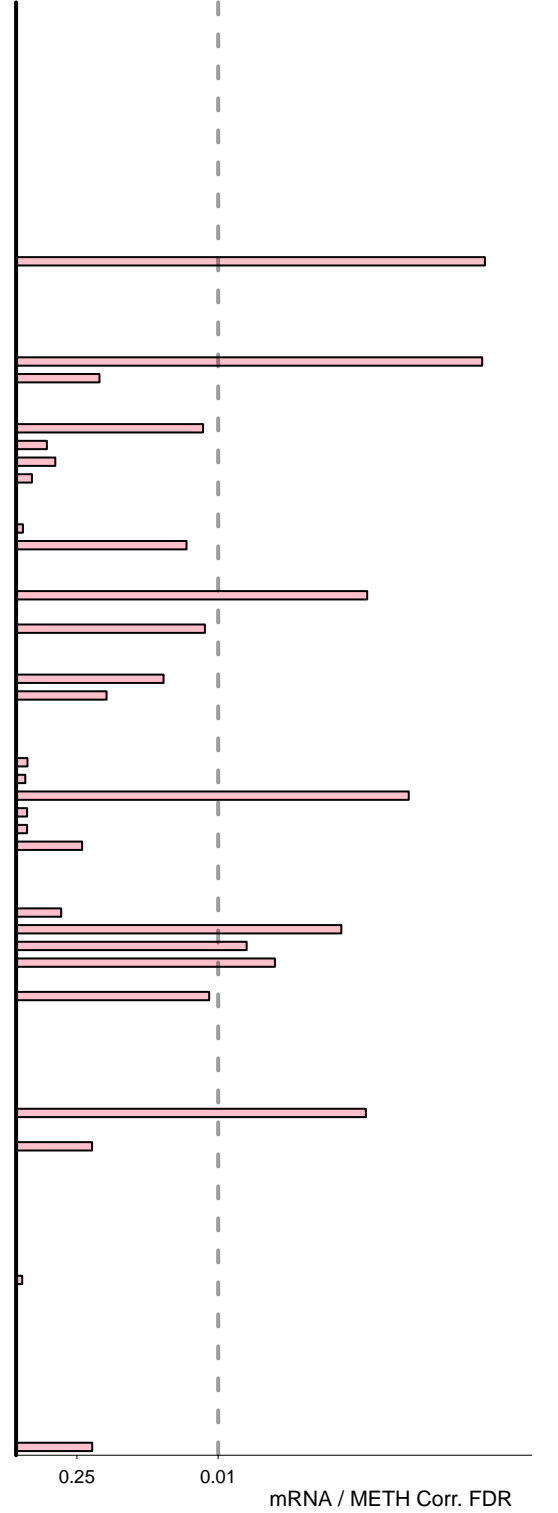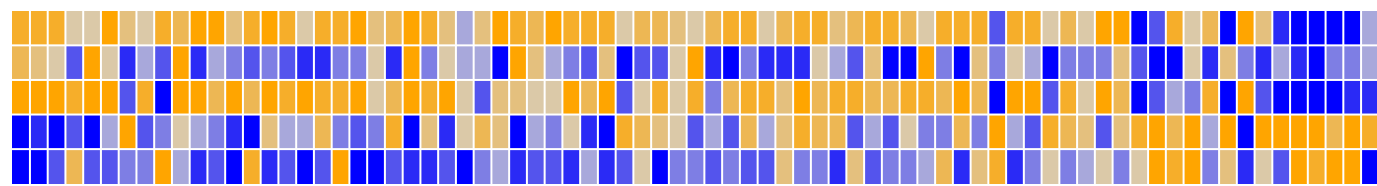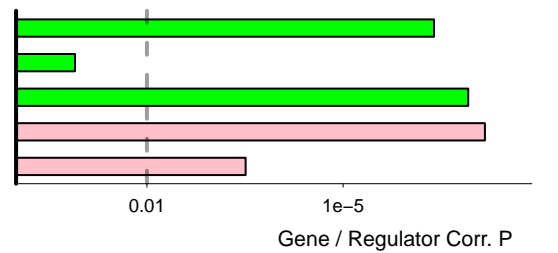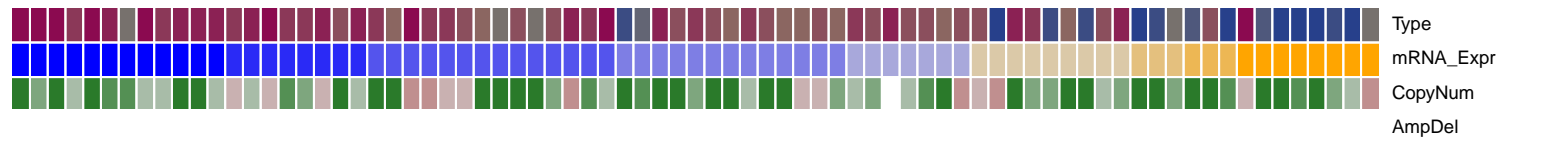

TCGA-EE-A29L-06  
TCGA-GN-A8LK-06  
TCGA-EE-A185-06  
TCGA-3N-A9WB-06  
TCGA-DA-A1IA-06  
TCGA-D9-A4Z6-06  
TCGA-D3-A3C6-06  
TCGA-D3-A8GK-06  
TCGA-D3-A3M1-06  
TCGA-PS-A1ZY-06  
TCGA-D9-A6EG-06  
TCGA-EE-A2GR-06  
TCGA-PS-A4F0-06  
TCGA-EE-A29F-06  
TCGA-D3-A8GT-06  
TCGA-PS-A1ZK-06  
TCGA-W3-AA21-06  
TCGA-PS-A1ZZ-06  
TCGA-D3-A1QL-06  
TCGA-ER-A3ES-06  
TCGA-D3-A8GF-06  
TCGA-PS-A4FB-06  
TCGA-GN-A8LL-06  
TCGA-D3-A5GL-06  
TCGA-EE-A29B-06  
TCGA-D3-A8GV-06  
TCGA-PS-A4F5-06  
TCGA-FW-A3I3-06  
TCGA-EE-A17Z-06  
TCGA-EE-A3AH-06  
TCGA-YG-AA3P-06  
TCGA-GN-A268-06  
TCGA-EE-A3JI-06  
TCGA-GN-A4U7-06  
TCGA-WE-A8ZQ-06  
TCGA-EE-A2A5-06  
TCGA-GN-A262-06  
TCGA-PS-A1ZU-06  
TCGA-PR-A8YD-06  
TCGA-DA-A95Z-06  
TCGA-PS-A1ZJ-06  
TCGA-EE-A29D-06  
TCGA-DA-A95W-06  
TCGA-WE-A8JZ-06  
TCGA-PS-A1YV-06  
TCGA-PS-A1ZE-06  
TCGA-EE-A3J7-06  
TCGA-D3-A1O2-06  
TCGA-D9-A1X3-06  
TCGA-D3-A1Q3-07  
TCGA-W3-A821-06  
TCGA-D3-A8G1-06  
TCGA-D9-A6EC-06  
TCGA-PS-A4F9-06  
TCGA-ER-A19F-06  
TCGA-LH-A9QB-06  
TCGA-EE-A3AD-06  
TCGA-RP-A695-06  
TCGA-EE-A3J8-06  
TCGA-PS-A1Z3-06  
TCGA-D3-A3MO-06  
TCGA-RP-A690-06  
TCGA-EE-A180-06  
TCGA-EE-A20H-06  
TCGA-WE-A8K6-06  
TCGA-D3-A8GC-06  
TCGA-WE-A8ZM-06  
TCGA-PR-A7U8-06  
TCGA-D3-A1Q5-06  
TCGA-PS-A1ZG-06  
TCGA-ER-A191-06  
TCGA-ER-A42K-06  
TCGA-EE-A2GO-06  
TCGA-PS-A1ZC-06  
TCGA-PS-A2MM-06  
TCGA-EE-A29A-06  
TCGA-EE-A20C-06

# AXL

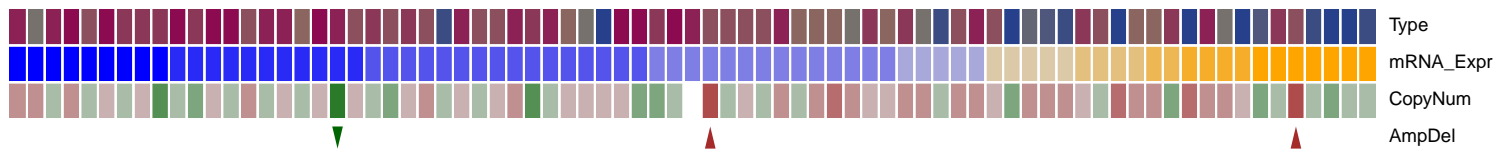

19 : 41724653  
 19 : 41724898  
 19 : 41725053  
 19 : 41725152  
 19 : 41725202  
 19 : 41725332  
 19 : 41729657  
 19 : 41731934  
 19 : 41732123  
 19 : 41732221  
 19 : 41732468  
 19 : 41767669

GeneLoc  
 PromoterAssoc  
 CpGIsland

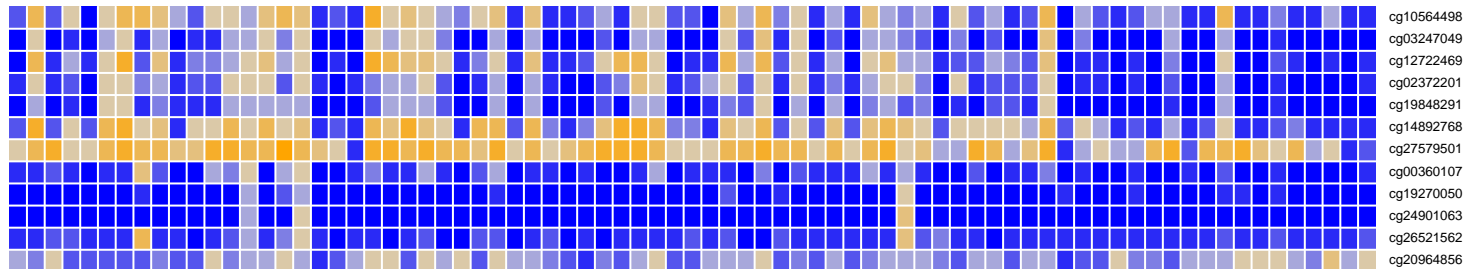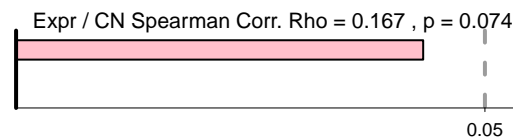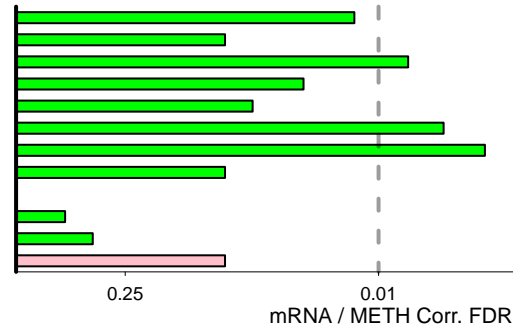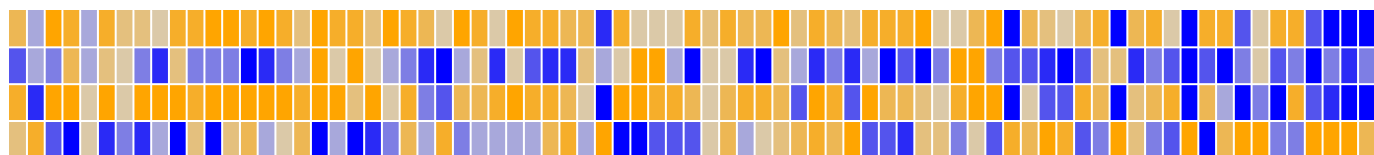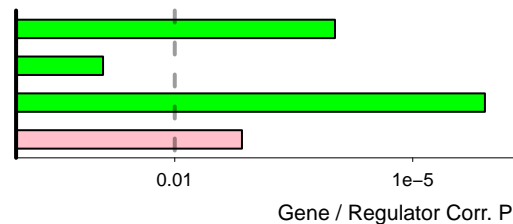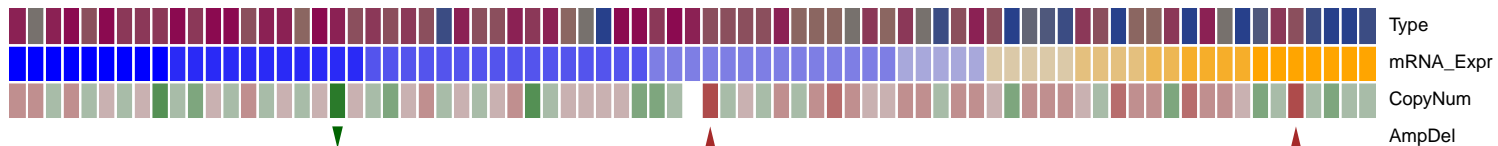

TCGA-GN-A262-06  
 TCGA-EE-A20C-06  
 TCGA-ER-A3ES-06  
 TCGA-EE-A29L-06  
 TCGA-D3-A8GV-06  
 TCGA-GN-A8LK-06  
 TCGA-D3-A8GP-06  
 TCGA-FS-A4F0-06  
 TCGA-W3-AA21-06  
 TCGA-GN-A4U7-06  
 TCGA-D3-A5GL-06  
 TCGA-FS-A1ZG-06  
 TCGA-D3-A8GL-06  
 TCGA-FS-A4F9-06  
 TCGA-D9-A6EG-06  
 TCGA-GN-A268-06  
 TCGA-ER-A3I7-06  
 TCGA-GN-A8LL-06  
 TCGA-EE-A3AD-06  
 TCGA-EE-A17Z-06  
 TCGA-EE-A29B-06  
 TCGA-YC-AA3P-06  
 TCGA-EE-A29D-06  
 TCGA-DA-A95Z-06  
 TCGA-WE-A8ZQ-06  
 TCGA-EE-A2GR-06  
 TCGA-D9-A1X3-06  
 TCGA-DA-A95W-06  
 TCGA-D9-A4Z6-06  
 TCGA-FS-A1ZK-06  
 TCGA-FS-A1ZZ-06  
 TCGA-FS-A4FB-06  
 TCGA-EE-A3AH-06  
 TCGA-EE-A185-06  
 TCGA-DA-A1IA-06  
 TCGA-FR-A8YD-06  
 TCGA-D3-A8GK-06  
 TCGA-D3-A1QA-07  
 TCGA-FS-A1ZU-06  
 TCGA-FS-A1ZE-06  
 TCGA-FR-A7U8-06  
 TCGA-W3-A824-06  
 TCGA-EE-A180-06  
 TCGA-FS-A4F5-06  
 TCGA-FS-A1YW-06  
 TCGA-FS-A1Z3-06  
 TCGA-D3-A3C6-06  
 TCGA-RP-A695-06  
 TCGA-ER-A1Z1-06  
 TCGA-EE-A3T1-06  
 TCGA-FW-A3I3-06  
 TCGA-D3-A3MO-06  
 TCGA-D3-A6GI-06  
 TCGA-FS-A1ZY-06  
 TCGA-RP-A690-06  
 TCGA-EE-A20H-06  
 TCGA-EE-A2A5-06  
 TCGA-ER-A19L-06  
 TCGA-EE-A3J8-06  
 TCGA-D3-A1QA-06  
 TCGA-ER-A19F-06  
 TCGA-D3-A1Q5-06  
 TCGA-WE-A8JZ-06  
 TCGA-D9-A6EC-06  
 TCGA-3N-A9WB-06  
 TCGA-FS-A1ZC-06  
 TCGA-EE-A29E-06  
 TCGA-D3-A8GC-06  
 TCGA-LH-A9QB-06  
 TCGA-WE-A8ZM-06  
 TCGA-D3-A3ML-06  
 TCGA-D3-A1O1-06  
 TCGA-WE-A8K6-06  
 TCGA-EE-A29A-06  
 TCGA-EE-A2GO-06  
 TCGA-EE-A2MM-06

# COL13A1

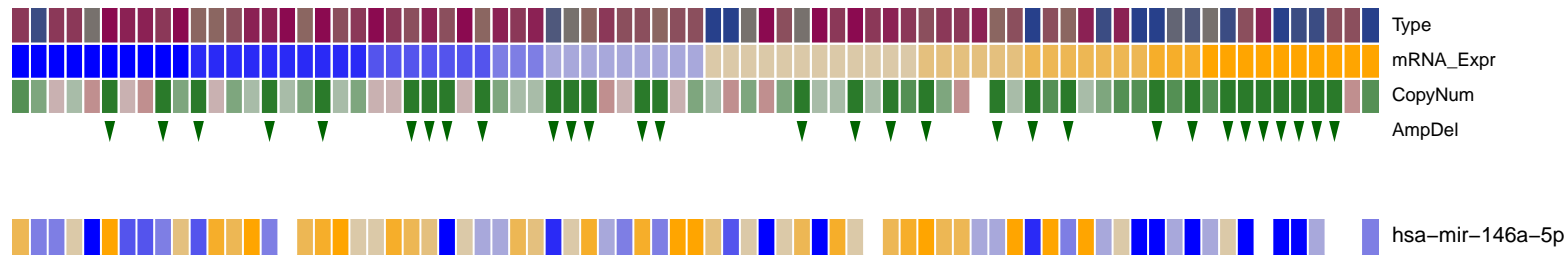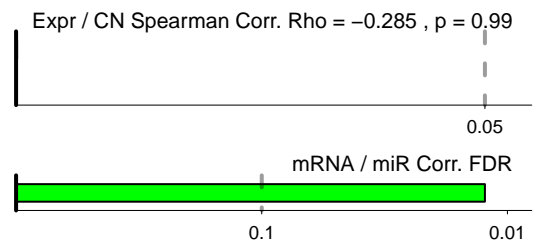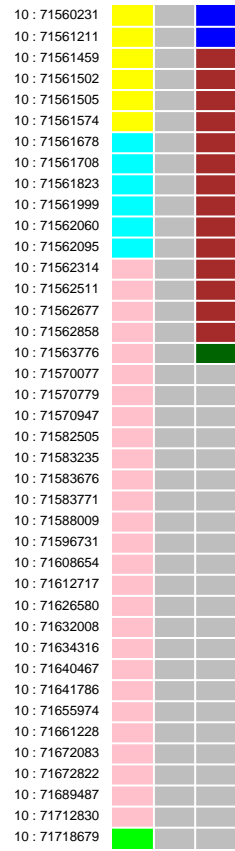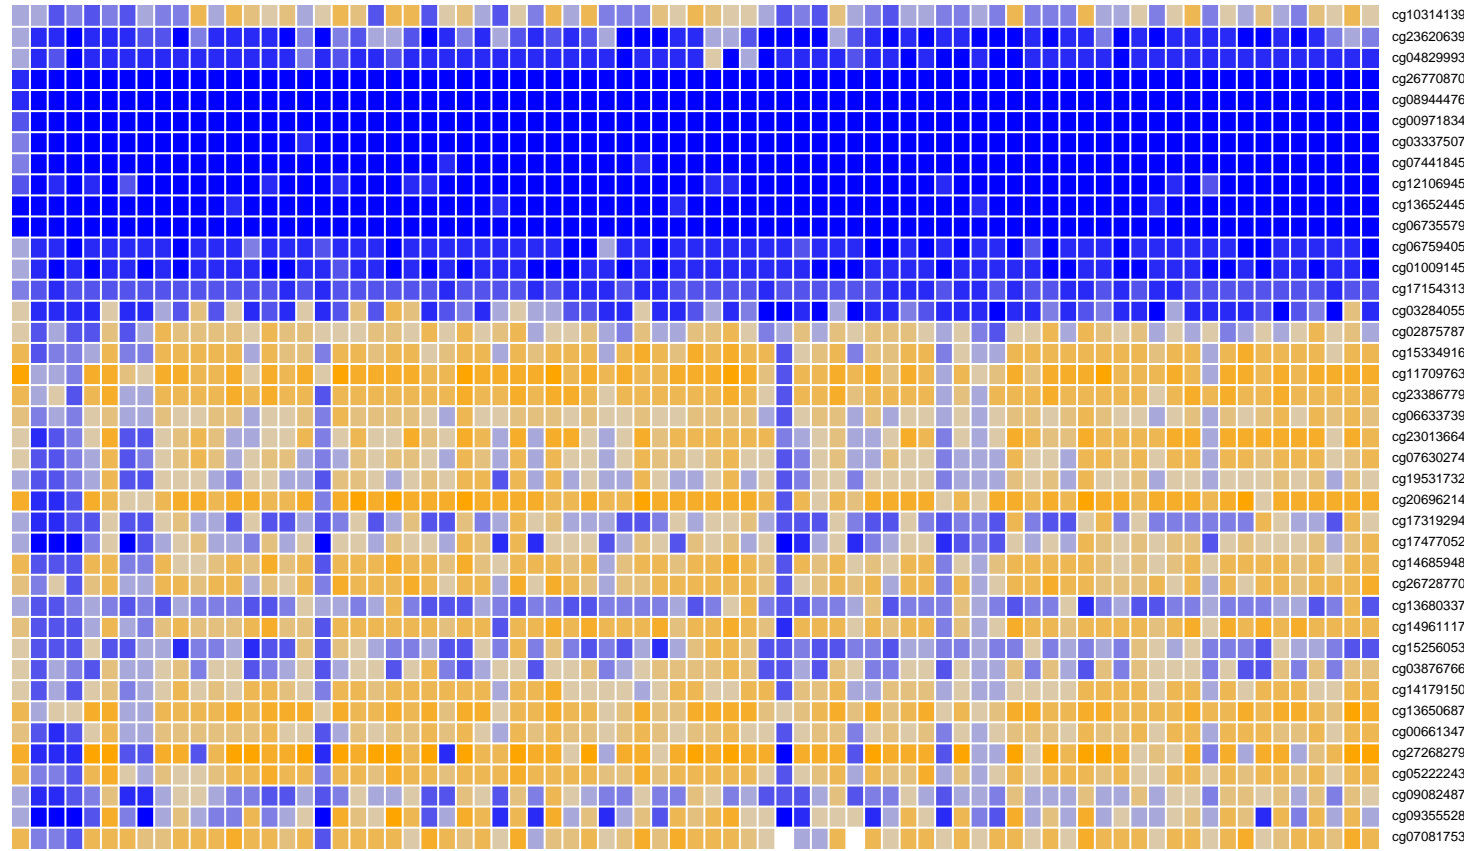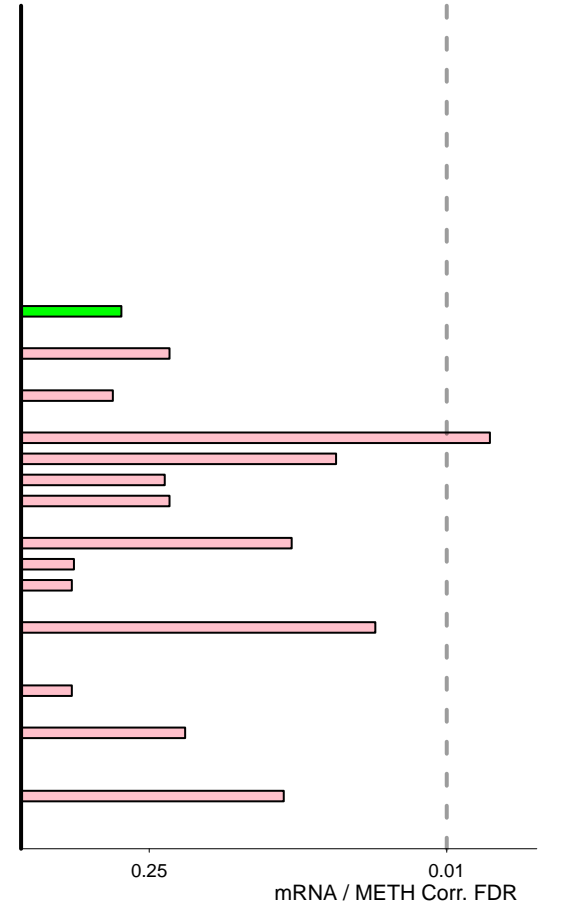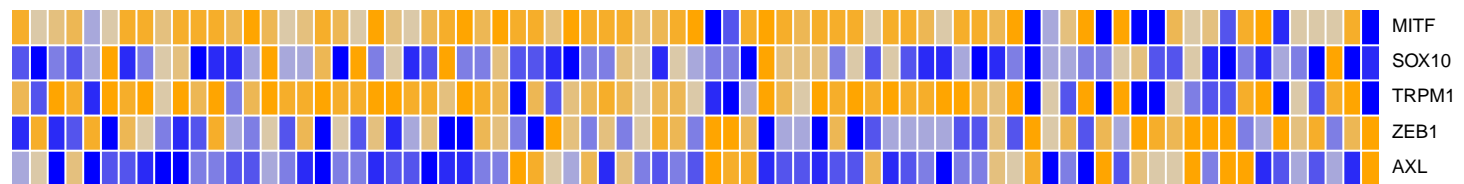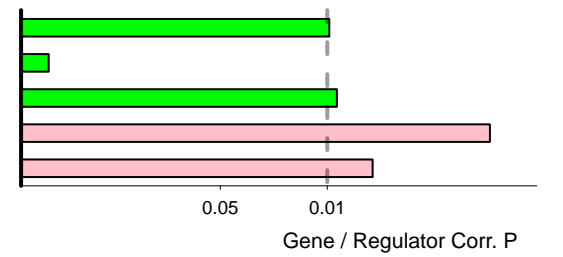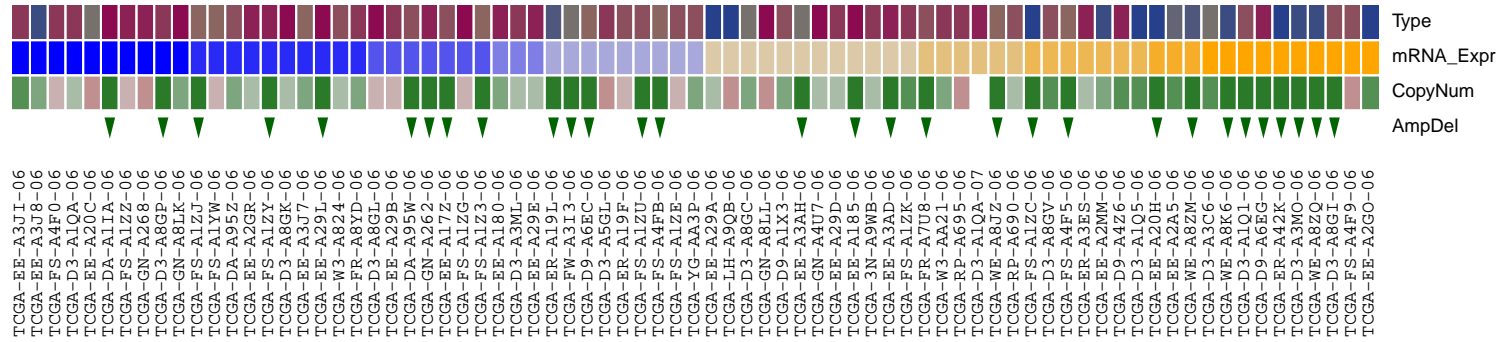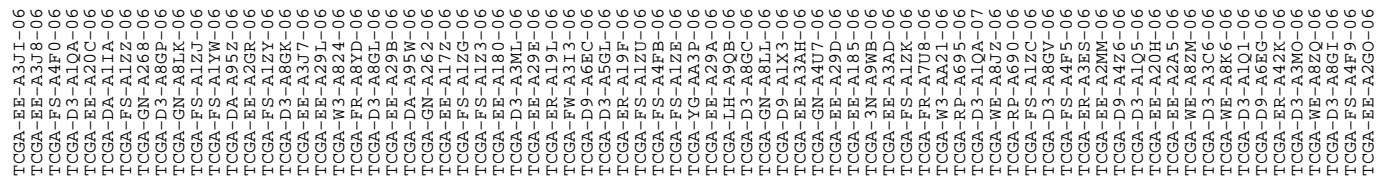

# RIN2

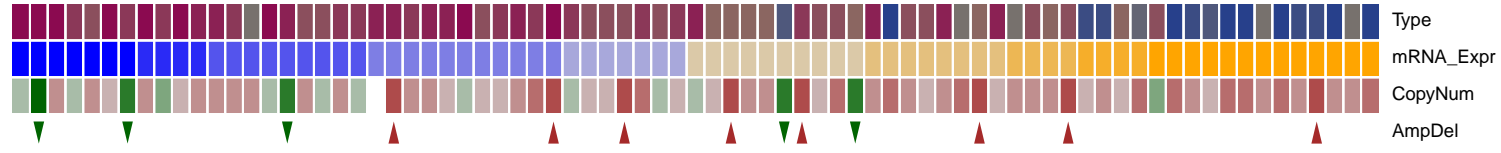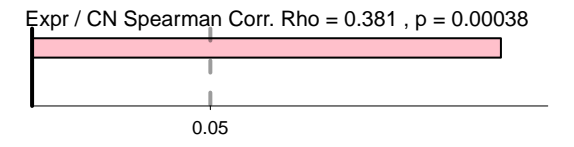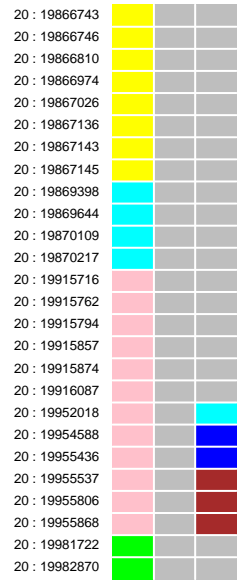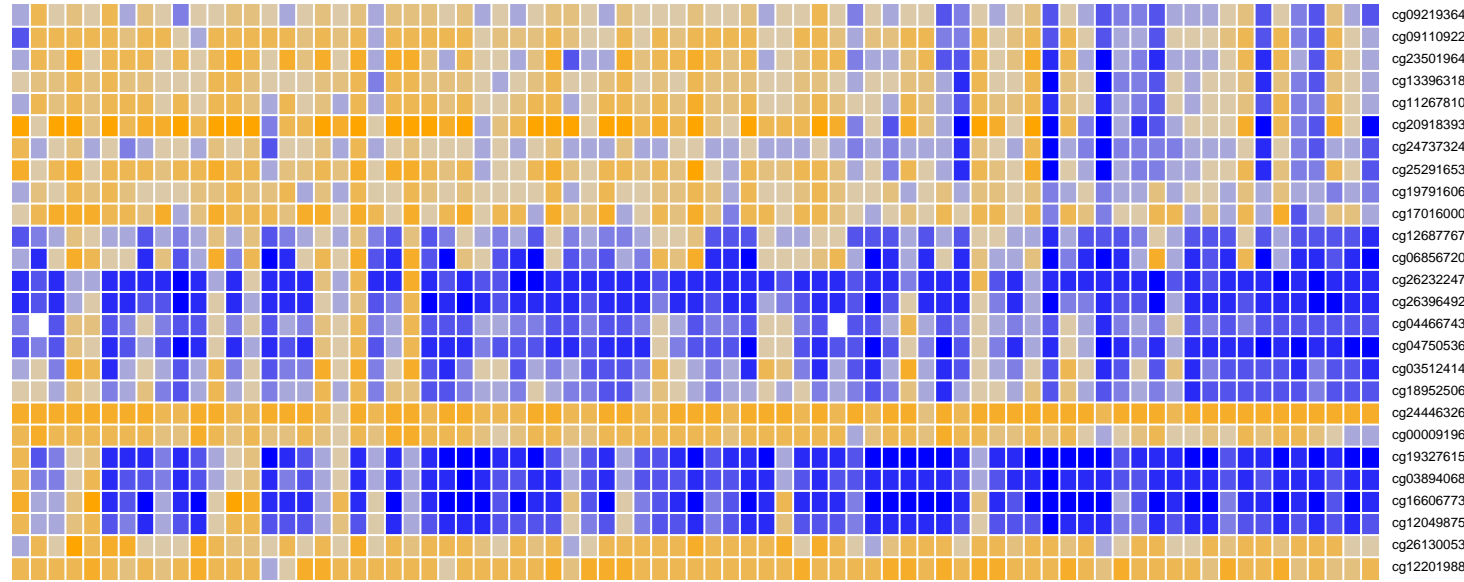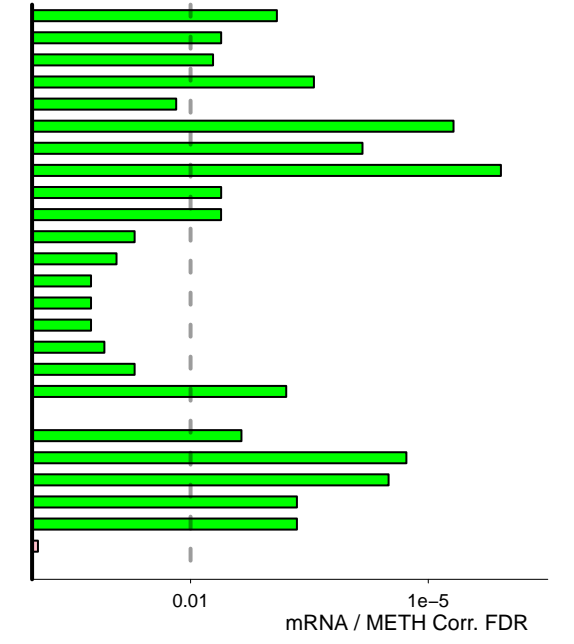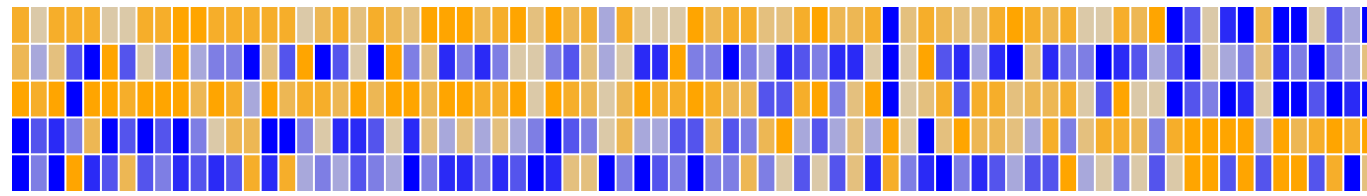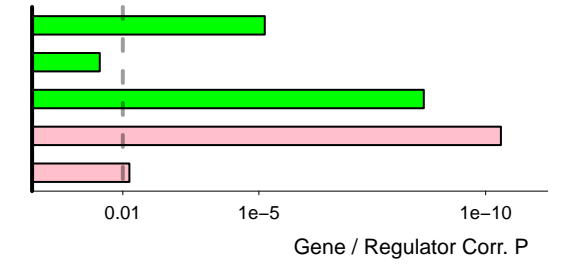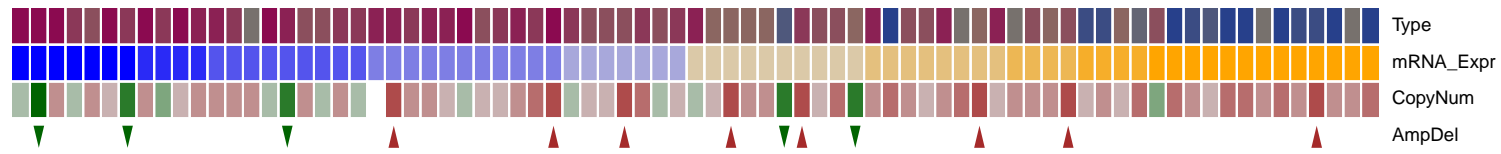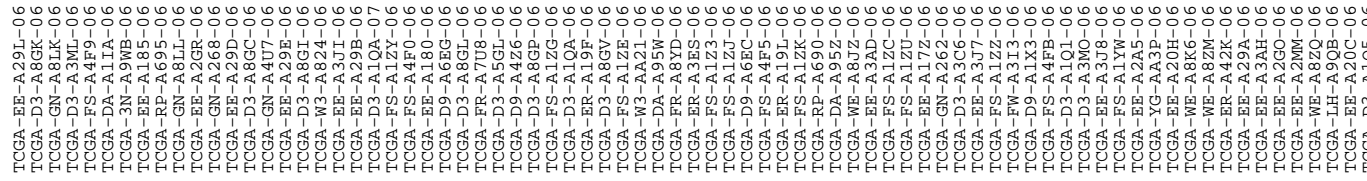

# ADAMTS12

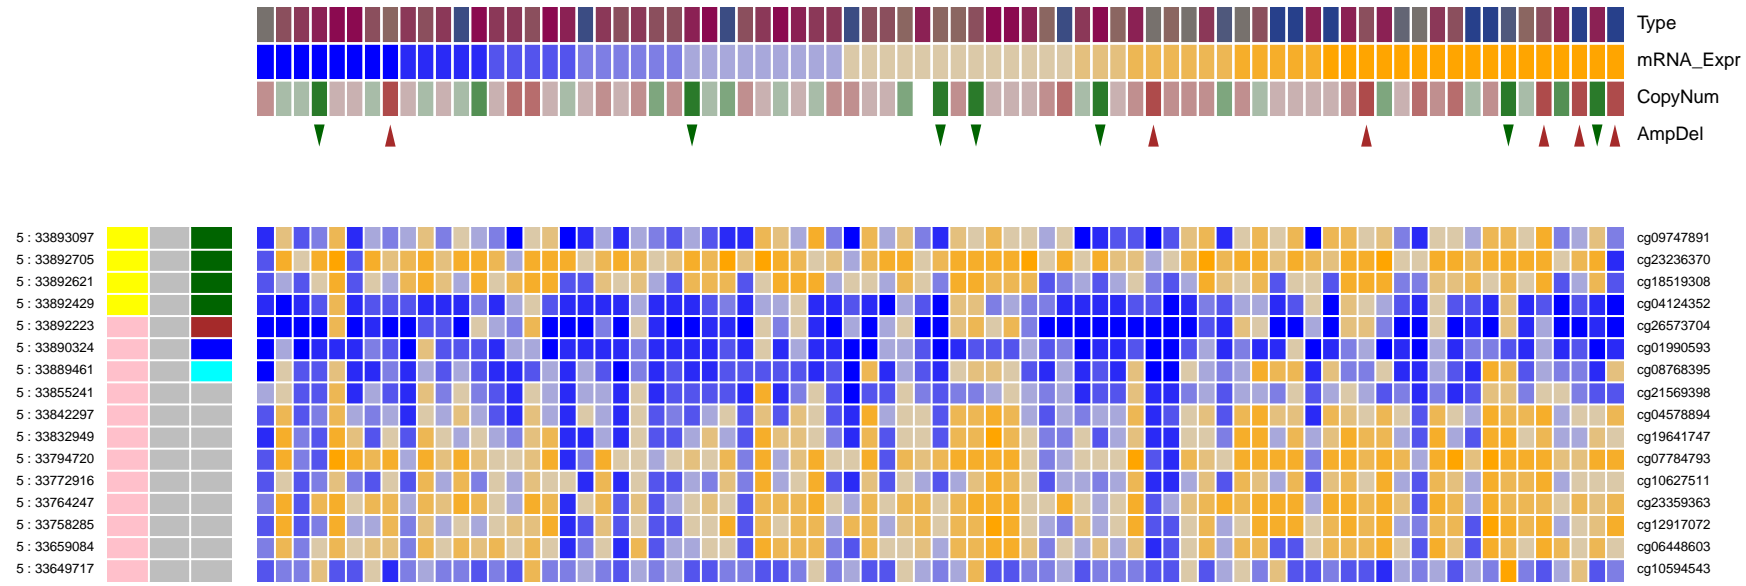

GeneLoc  
PromoterAssoc  
CpGIsland

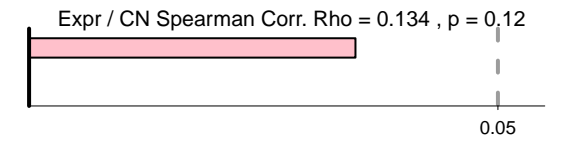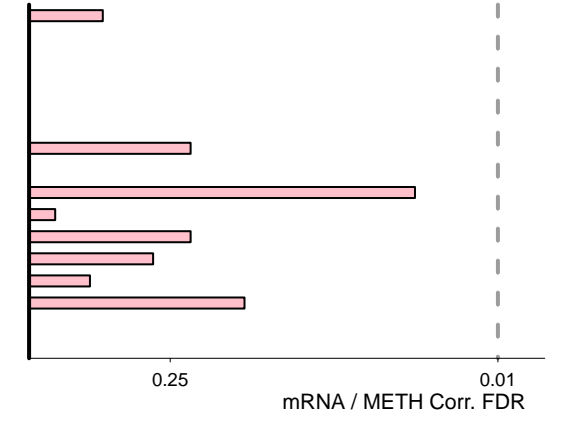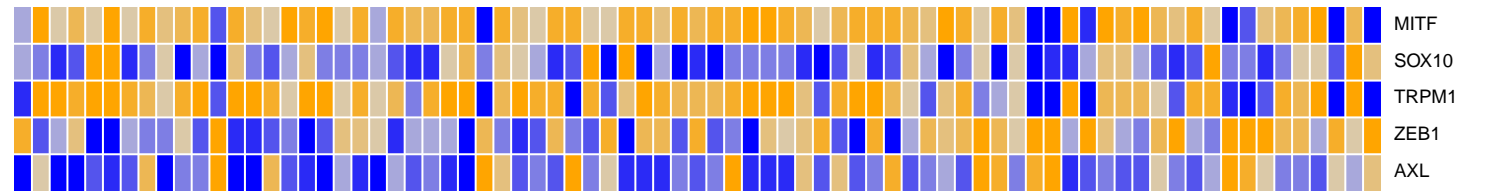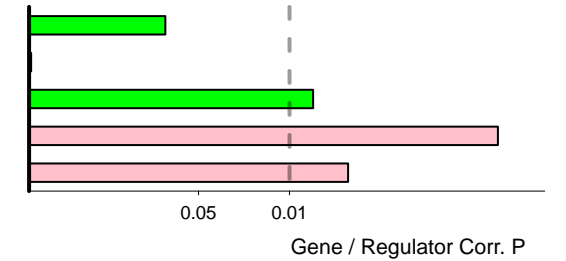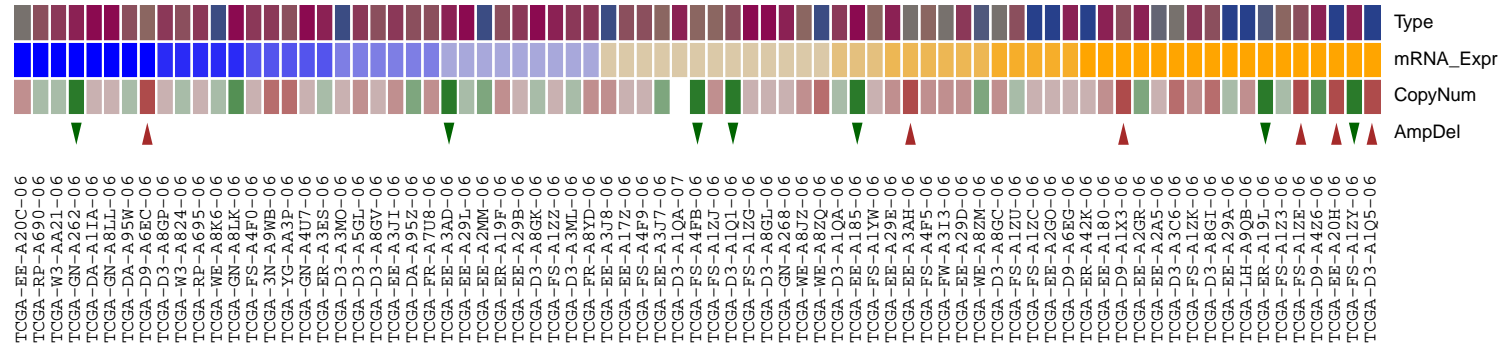

# GPR39

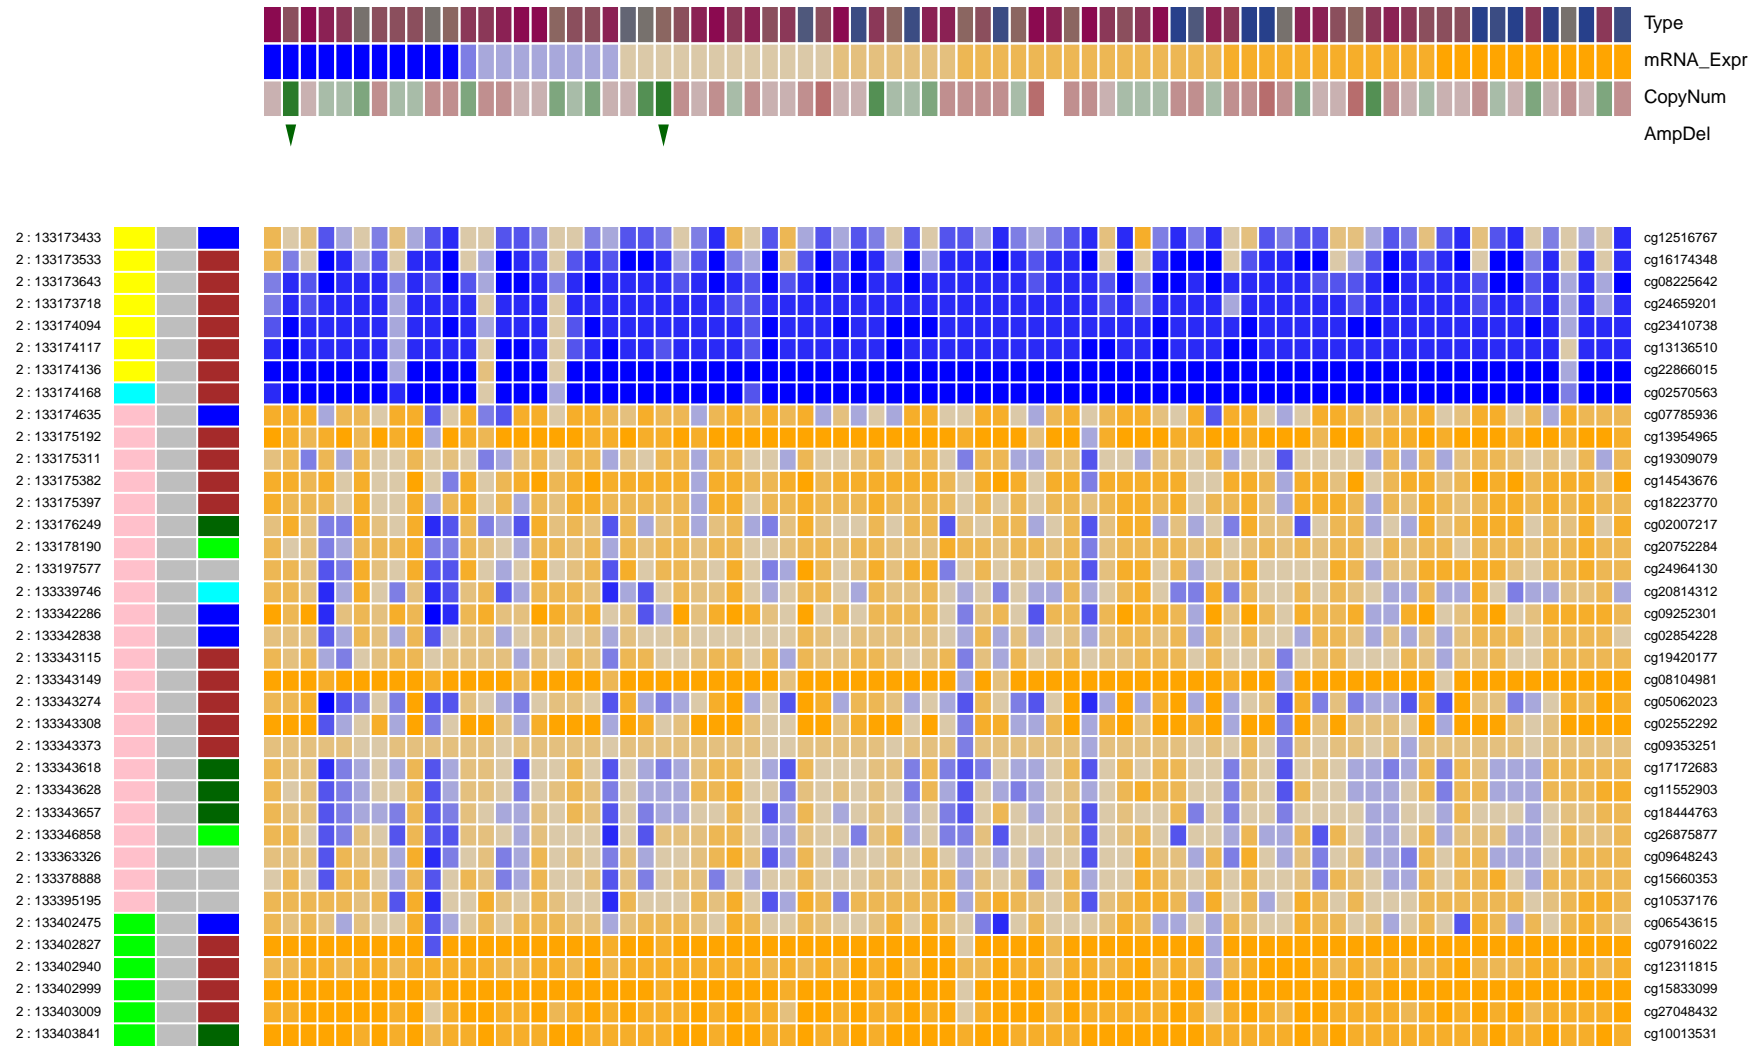

GeneLoc  
PromoterAssoc  
CpGIsland

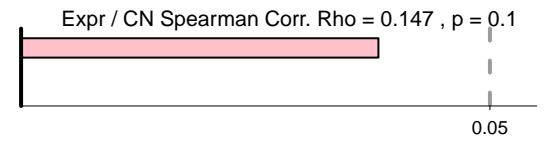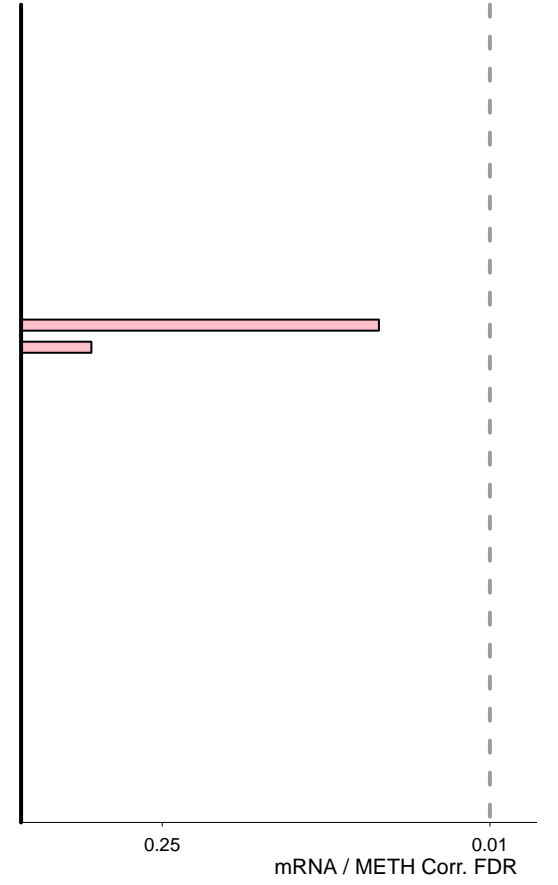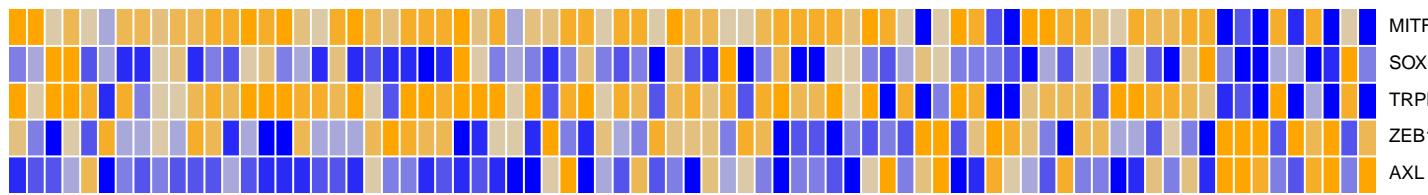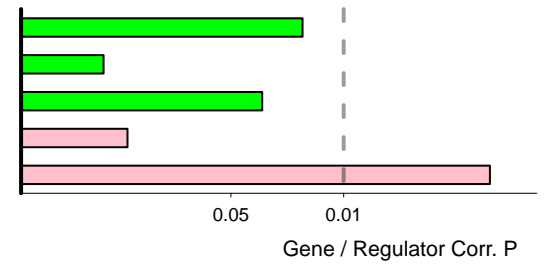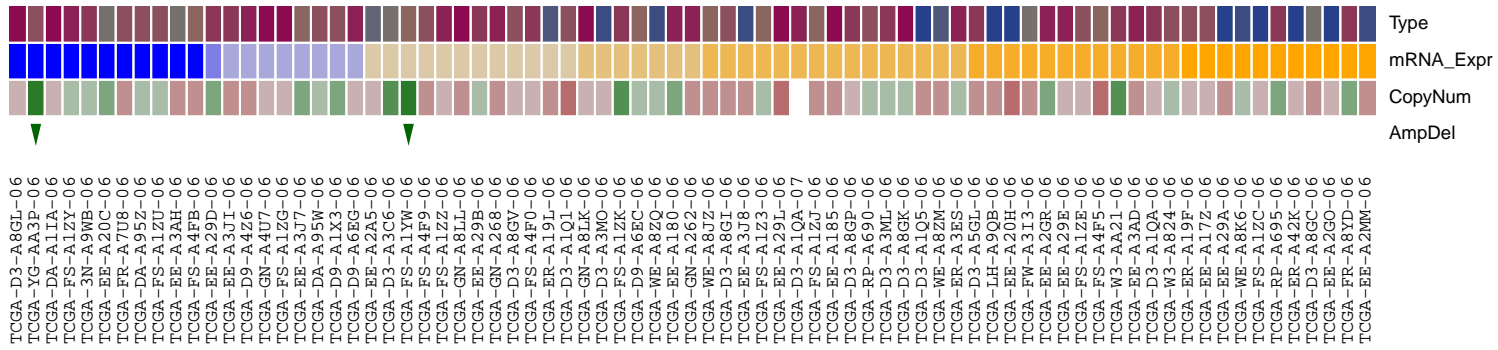

TCGA-D3-A8GL-06  
TCGA-YG-AA3P-06  
TCGA-DA-A1IA-06  
TCGA-FS-A1ZY-06  
TCGA-3N-A9WB-06  
TCGA-EE-A20C-06  
TCGA-FR-A7U8-06  
TCGA-DA-A95Z-06  
TCGA-FS-A1ZU-06  
TCGA-EE-A3AH-06  
TCGA-FS-A4FB-06  
TCGA-EE-A29D-06  
TCGA-EE-A3JI-06  
TCGA-D9-A4Z6-06  
TCGA-GN-A4U7-06  
TCGA-FS-A1ZC-06  
TCGA-EE-A3J7-06  
TCGA-DA-A95W-06  
TCGA-DA-A1X3-06  
TCGA-D9-A6EG-06  
TCGA-EE-A2A3-06  
TCGA-D3-A3C6-06  
TCGA-FS-A1YW-06  
TCGA-FS-A4F9-06  
TCGA-FS-A1ZZ-06  
TCGA-GN-A8LL-06  
TCGA-EE-A29B-06  
TCGA-GN-A268-06  
TCGA-D3-A8GV-06  
TCGA-FS-A4F0-06  
TCGA-ER-A19L-06  
TCGA-D3-A1Q1-06  
TCGA-GN-A8LK-06  
TCGA-D3-A3M0-06  
TCGA-FS-A1ZK-06  
TCGA-D9-A6EC-06  
TCGA-WE-A8ZQ-06  
TCGA-EE-A180-06  
TCGA-GN-A262-06  
TCGA-WE-A8JZ-06  
TCGA-D3-A8GI-06  
TCGA-EE-A3J8-06  
TCGA-FS-A1Z3-06  
TCGA-EE-A29L-06  
TCGA-D3-A1QA-07  
TCGA-FS-A1ZT-06  
TCGA-EE-A185-06  
TCGA-D3-A8CP-06  
TCGA-PP-A690-06  
TCGA-D3-A3ML-06  
TCGA-D3-A8SK-06  
TCGA-D3-A1Q5-06  
TCGA-WE-A8ZM-06  
TCGA-ER-A3ES-06  
TCGA-D3-A5GL-06  
TCGA-LH-A9OB-06  
TCGA-FW-A3I3-06  
TCGA-EE-A2GR-06  
TCGA-EE-A29E-06  
TCGA-FS-A1ZE-06  
TCGA-FS-A4F5-06  
TCGA-W3-AA21-06  
TCGA-EE-A3AD-06  
TCGA-D3-A1QA-06  
TCGA-W3-A824-06  
TCGA-ER-A19F-06  
TCGA-EE-A17Z-06  
TCGA-EE-A29A-06  
TCGA-WE-A8K6-06  
TCGA-FS-A1ZC-06  
TCGA-PP-A695-06  
TCGA-ER-A42K-06  
TCGA-D3-A8GC-06  
TCGA-EE-A2G0-06  
TCGA-FR-A8YD-06  
TCGA-EE-A2MM-06

# SERPINE1

7 : 100769605  
 7 : 100769903  
 7 : 100769933  
 7 : 100770060  
 7 : 100770192  
 7 : 100770286  
 7 : 100770414  
 7 : 100770434  
 7 : 100770476  
 7 : 100773718  
 7 : 100773851  
 7 : 100774767  
 7 : 100774810  
 7 : 100777740  
 7 : 100779017  
 7 : 100781178

GeneLoc  
 PromoterAssoc  
 CpGIsland

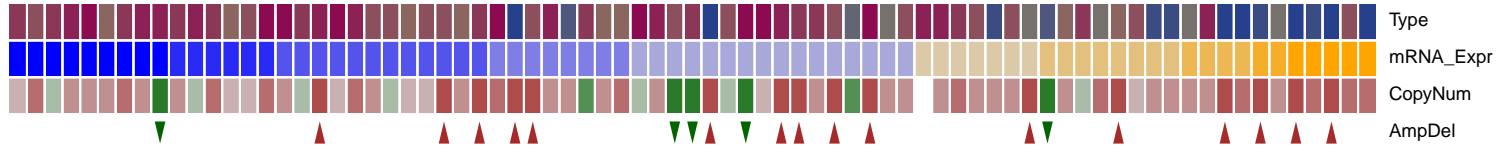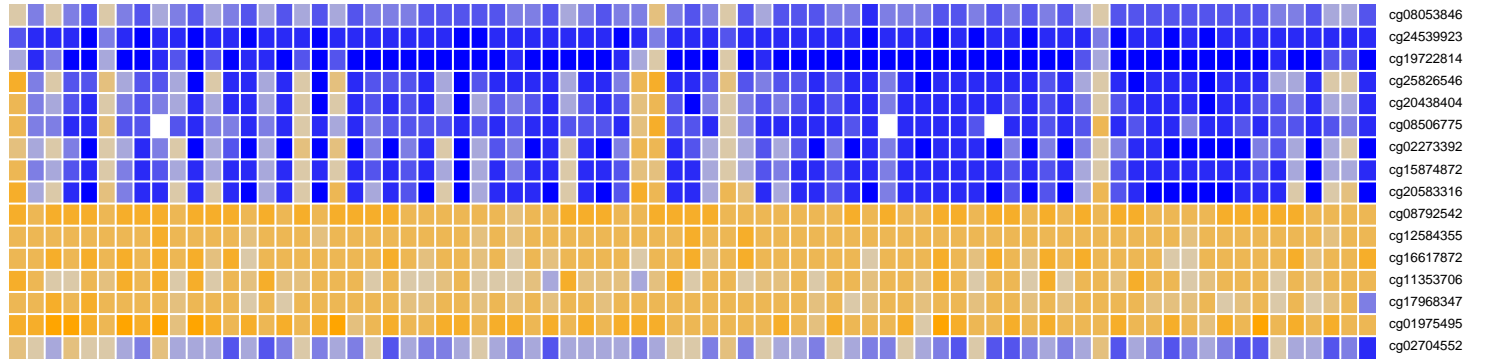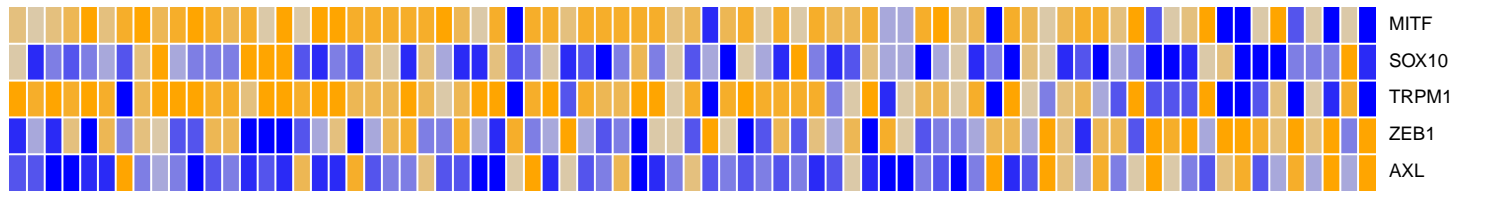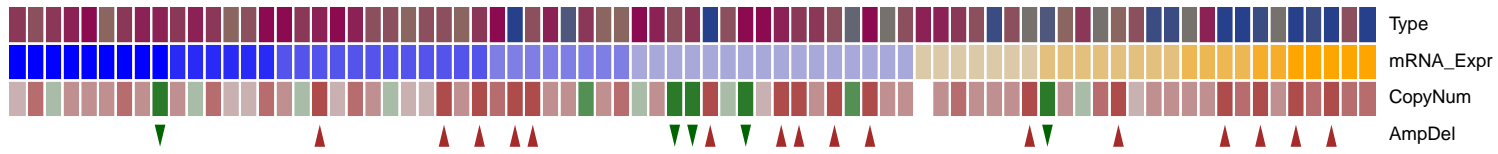

TCGA-EE-A29B-06  
 TCGA-DA-A95W-06  
 TCGA-FS-A4FO-06  
 TCGA-GN-A262-06  
 TCGA-FS-A1ZG-06  
 TCGA-EE-A3J7-06  
 TCGA-D3-A3ML-06  
 TCGA-EE-A180-06  
 TCGA-FS-A1ZY-06  
 TCGA-RP-A695-06  
 TCGA-ER-A3ES-06  
 TCGA-EE-A29D-06  
 TCGA-FS-A1Z3-06  
 TCGA-EE-A17Z-06  
 TCGA-DA-A11A-06  
 TCGA-GN-A8L1-06  
 TCGA-3N-A9ME-06  
 TCGA-D3-A6EC-06  
 TCGA-EE-A29E-06  
 TCGA-D9-A1X3-06  
 TCGA-FS-A1ZE-06  
 TCGA-FS-A1YW-06  
 TCGA-ER-A19F-06  
 TCGA-XG-AA3P-06  
 TCGA-FS-A4FB-06  
 TCGA-W3-AA21-06  
 TCGA-GN-A8LK-06  
 TCGA-EE-A20H-06  
 TCGA-D3-A1Q1-06  
 TCGA-EE-A3AD-06  
 TCGA-ER-A19L-06  
 TCGA-FS-A1ZK-06  
 TCGA-FS-A1ZJ-06  
 TCGA-D9-A6EC-06  
 TCGA-EE-A29L-06  
 TCGA-GN-A268-06  
 TCGA-FS-A1ZU-06  
 TCGA-D3-A1QA-06  
 TCGA-ER-A42K-06  
 TCGA-W3-A824-06  
 TCGA-EE-A185-06  
 TCGA-D3-A8GK-06  
 TCGA-FS-A1Z2-06  
 TCGA-PR-A8VD-06  
 TCGA-D3-A5GJ-06  
 TCGA-DA-A95Z-06  
 TCGA-EE-A2A5-06  
 TCGA-GN-A4U7-06  
 TCGA-EE-A20C-06  
 TCGA-D3-A8GV-06  
 TCGA-D3-A1QA-07  
 TCGA-EE-A2GR-06  
 TCGA-D3-A8GP-06  
 TCGA-PR-A7U8-06  
 TCGA-EE-A2MM-06  
 TCGA-FS-A4F9-06  
 TCGA-EE-A3AH-06  
 TCGA-WE-A8ZM-06  
 TCGA-EE-A8JZ-06  
 TCGA-EE-A3JI-06  
 TCGA-D3-A8GC-06  
 TCGA-FS-A4F5-06  
 TCGA-RP-A690-06  
 TCGA-WE-A8K6-06  
 TCGA-EE-A3J8-06  
 TCGA-D3-A3C6-06  
 TCGA-D9-A4Z6-06  
 TCGA-D3-A1Q5-06  
 TCGA-FS-A1ZC-06  
 TCGA-WE-A8ZQ-06  
 TCGA-FW-A313-06  
 TCGA-LH-A9OB-06  
 TCGA-D3-A3MO-06  
 TCGA-EE-A29A-06  
 TCGA-D3-A8G1-06  
 TCGA-EE-A2GG-06

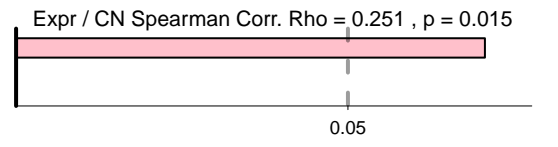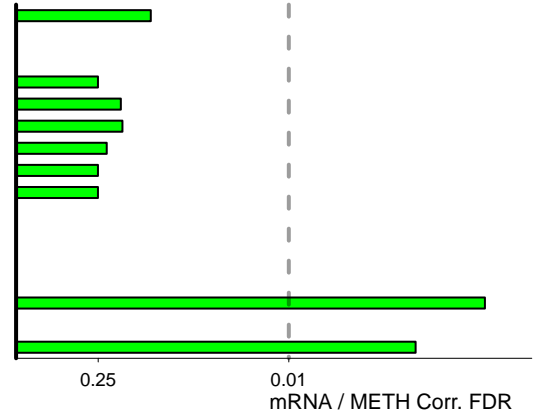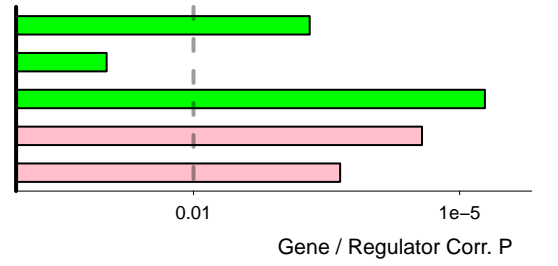



# LTBP1

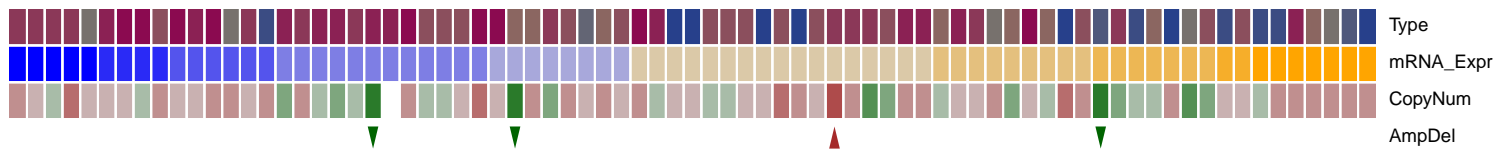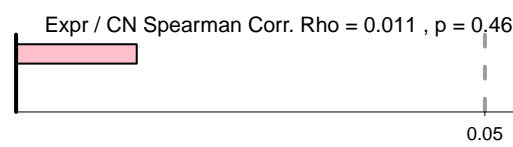

2 : 33171334  
 2 : 33171699  
 2 : 33171784  
 2 : 33172002  
 2 : 33172442  
 2 : 33172444  
 2 : 33173163  
 2 : 33173301  
 2 : 33217152  
 2 : 33226136  
 2 : 33240386  
 2 : 33245988  
 2 : 33249103  
 2 : 33295138  
 2 : 33311428  
 2 : 33317174  
 2 : 33342294  
 2 : 33348262  
 2 : 33359198  
 2 : 33359281  
 2 : 33359356  
 2 : 33359529  
 2 : 33359550  
 2 : 33359688  
 2 : 33368461  
 2 : 33372733  
 2 : 33384367  
 2 : 33391915  
 2 : 33415906  
 2 : 33428629  
 2 : 33433039  
 2 : 33436054  
 2 : 33467199  
 2 : 33493596  
 2 : 33500889  
 2 : 33518258  
 2 : 33541881  
 2 : 33546572  
 2 : 33585815  
 2 : 33588519  
 2 : 33596547  
 2 : 33604572  
 2 : 33611619  
 2 : 33612876  
 2 : 33622300

GeneLoc  
 PromoterAssoc  
 CpGIsland

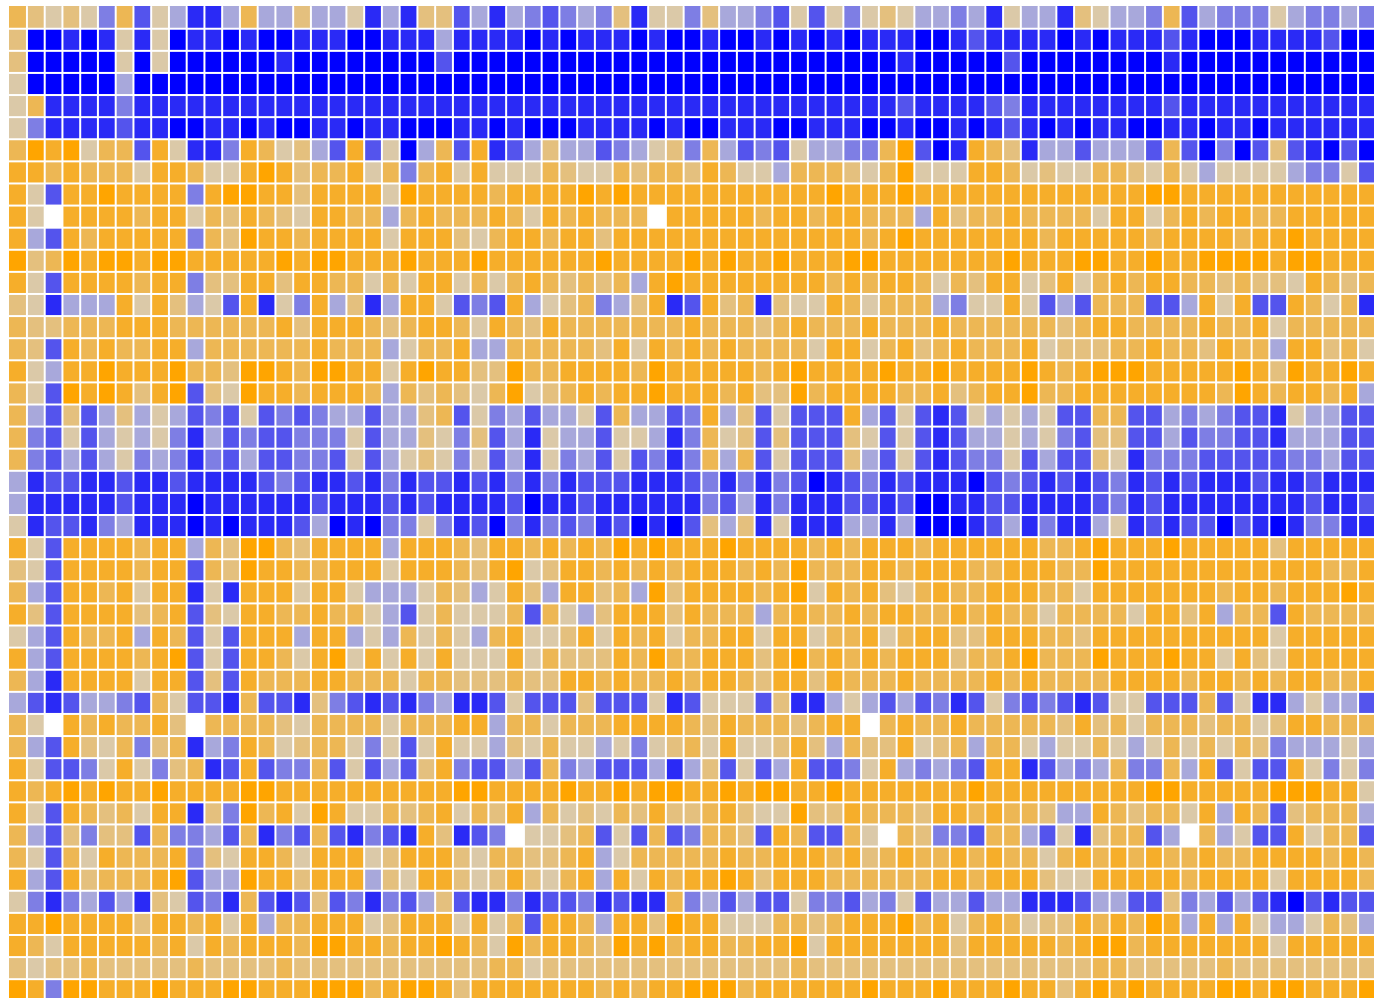

cg26822501  
 cg27072387  
 cg25121332  
 cg20253659  
 cg11199399  
 cg04729594  
 cg27569706  
 cg21139003  
 cg01590866  
 cg14260773  
 cg21843347  
 cg21441730  
 cg04745820  
 cg16336556  
 cg24351977  
 cg20948956  
 cg01268021  
 cg00908117  
 cg11918450  
 cg15135286  
 cg13652008  
 cg03906115  
 cg08357990  
 cg14102437  
 cg11865223  
 cg07895807  
 cg08175640  
 cg26672287  
 cg08818866  
 cg14392843  
 cg12210094  
 cg14065857  
 cg16572410  
 cg00286188  
 cg21846949  
 cg18188235  
 cg18658787  
 cg10489463  
 cg15772133  
 cg03172098  
 cg07119076  
 cg18538138  
 cg27366866  
 cg22827324  
 cg24675770

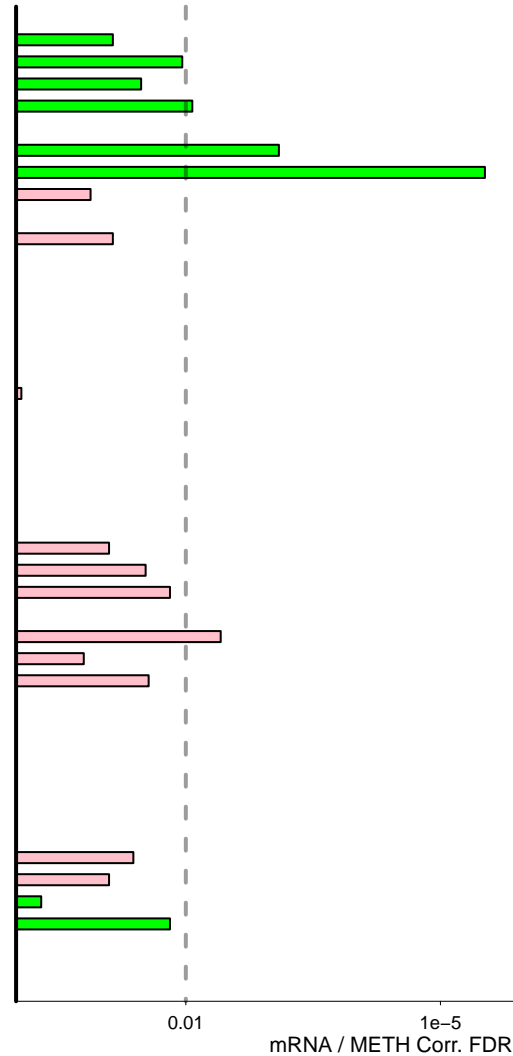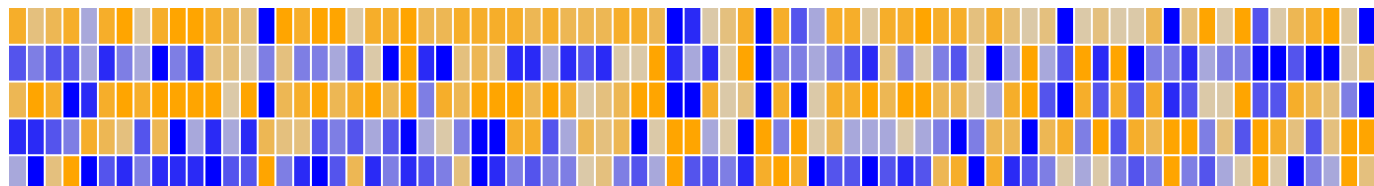

MITF  
 SOX10  
 TRPM1  
 ZEB1  
 AXL

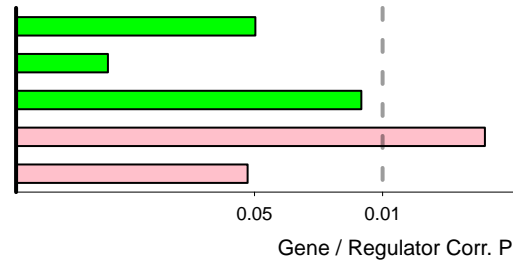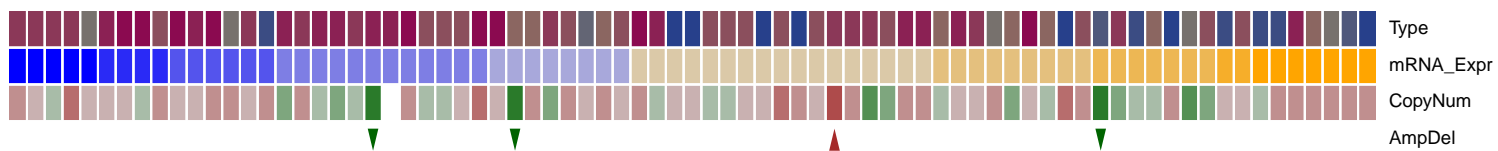

TCGA-EE-A3JI-06  
 TCGA-FS-A4F0-06  
 TCGA-D3-A1QA-06  
 TCGA-D3-A3ML-06  
 TCGA-EE-A20C-06  
 TCGA-FS-A1ZZ-06  
 TCGA-D3-A8GL-06  
 TCGA-FS-A4F9-06  
 TCGA-FS-A1ZG-06  
 TCGA-D9-A6EG-06  
 TCGA-GN-A8LK-06  
 TCGA-EE-A3AH-06  
 TCGA-EE-A29B-06  
 TCGA-EE-A2MW-06  
 TCGA-EE-A180-06  
 TCGA-D3-A5GL-06  
 TCGA-ER-A3ES-06  
 TCGA-EE-A2GR-06  
 TCGA-3N-A3WB-06  
 TCGA-EE-A3AD-06  
 TCGA-D3-A1QA-07  
 TCGA-GN-A6LL-06  
 TCGA-DA-A95Z-06  
 TCGA-W3-A824-06  
 TCGA-EE-A19F-06  
 TCGA-EE-A29L-06  
 TCGA-GN-A4U7-06  
 TCGA-FS-A1YW-06  
 TCGA-FS-A4FB-06  
 TCGA-RP-A695-06  
 TCGA-FR-A7U8-06  
 TCGA-EE-A2A5-06  
 TCGA-WE-A8JZ-06  
 TCGA-FS-A1ZE-06  
 TCGA-EE-A185-06  
 TCGA-FS-A1ZY-06  
 TCGA-EE-A2GO-06  
 TCGA-ER-A42K-06  
 TCGA-DA-A95W-06  
 TCGA-FS-A1ZU-06  
 TCGA-EE-A17Z-06  
 TCGA-FS-A1ZC-06  
 TCGA-D3-A1Q1-06  
 TCGA-LH-A9QB-06  
 TCGA-D3-A8GV-06  
 TCGA-EE-A29D-06  
 TCGA-FS-A1ZK-06  
 TCGA-W3-A421-06  
 TCGA-D9-A1X3-06  
 TCGA-GN-A268-06  
 TCGA-D9-A4Z6-06  
 TCGA-D9-A6BC-06  
 TCGA-EE-A29E-06  
 TCGA-D3-A8GP-06  
 TCGA-D3-A8GC-06  
 TCGA-EE-A3J7-06  
 TCGA-DA-A1IA-06  
 TCGA-FS-A4F5-06  
 TCGA-EE-A20H-06  
 TCGA-D3-A8GI-06  
 TCGA-ER-A19L-06  
 TCGA-FR-A8YD-06  
 TCGA-WE-A8ZQ-06  
 TCGA-FS-A1Z3-06  
 TCGA-EE-A29A-06  
 TCGA-D3-A3C6-06  
 TCGA-YG-AA3P-06  
 TCGA-D3-A3M0-06  
 TCGA-RP-A690-06  
 TCGA-WE-A8K6-06  
 TCGA-EE-A3J8-06  
 TCGA-GN-A262-06  
 TCGA-FS-A1ZJ-06  
 TCGA-FW-A3I3-06  
 TCGA-WE-A8ZM-06  
 TCGA-D3-A1Q5-06

# TPBG

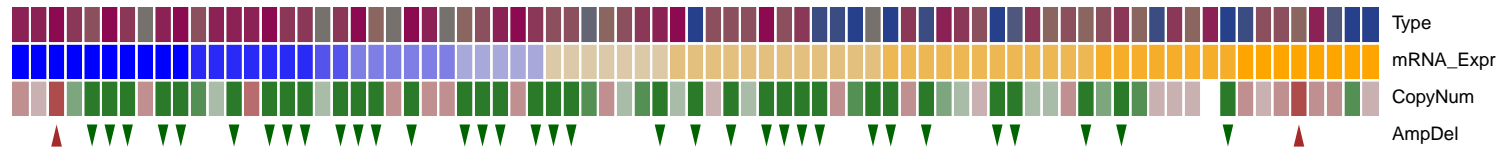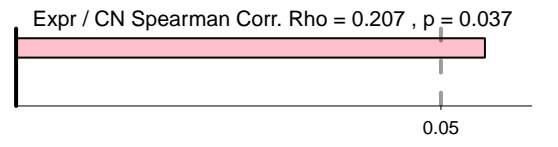

6 : 83071433  
6 : 83072400  
6 : 83072522  
6 : 83072747  
6 : 83072768  
6 : 83072774  
6 : 83072781  
6 : 83073156  
6 : 83073186  
6 : 83073237  
6 : 83073335  
6 : 83073803  
6 : 83073819  
6 : 83073863  
6 : 83073924  
6 : 83073948  
6 : 83073954  
6 : 83074533  
6 : 83074812  
6 : 83075080  
6 : 83075187  
6 : 83076311

GeneLoc  
PromoterAssoc  
CpGIsland

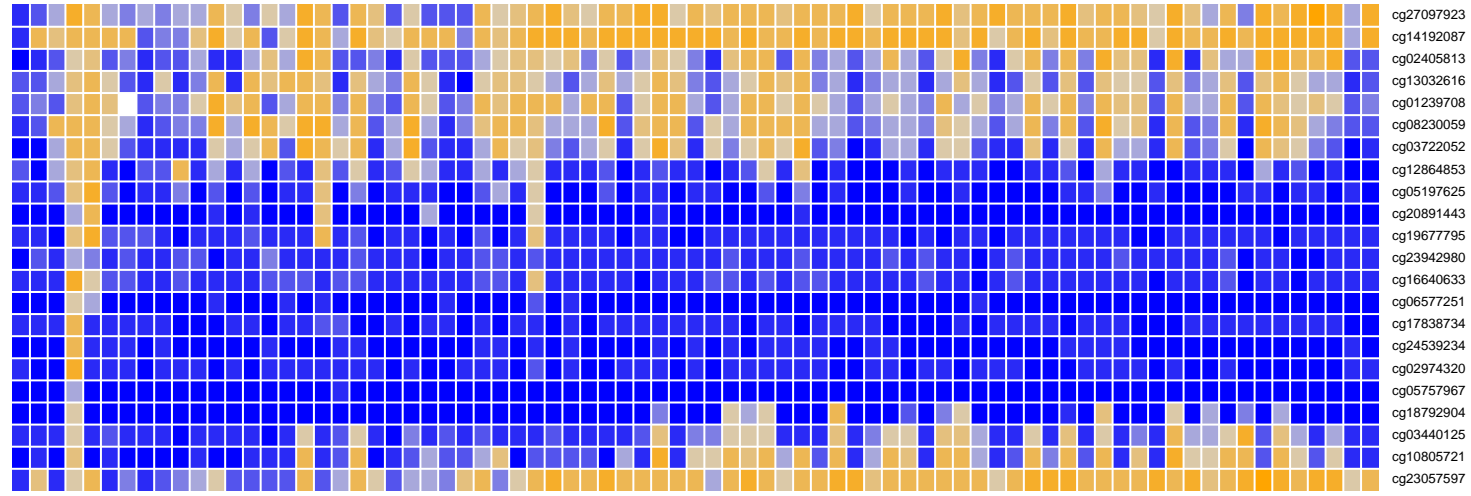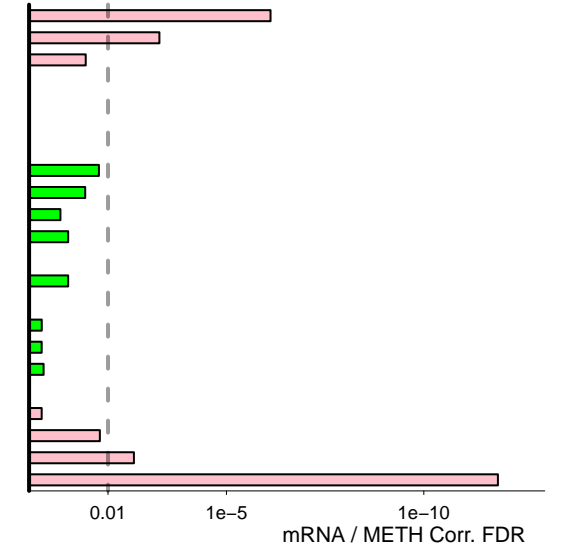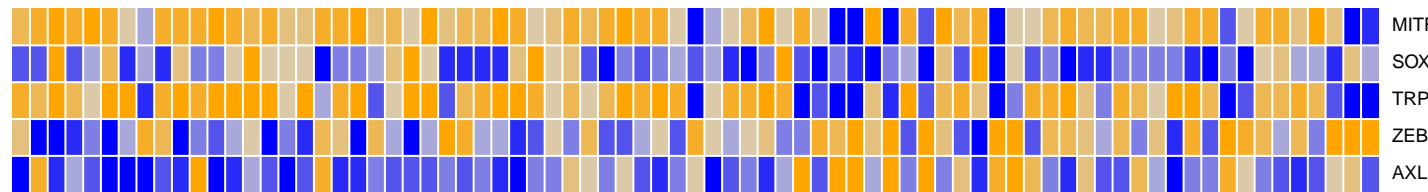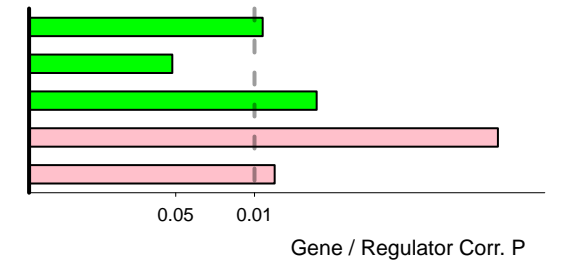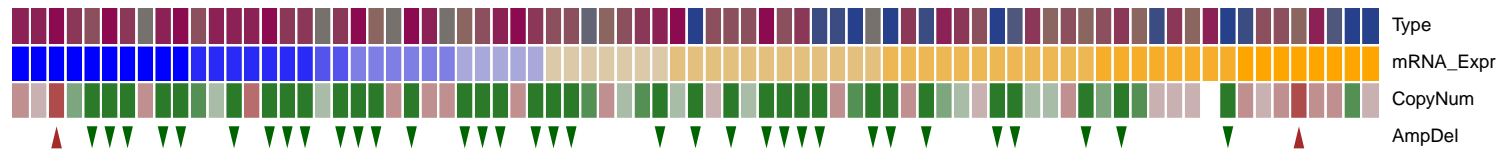

TCGA-GN-A262-06  
TCGA-EE-A29E-06  
TCGA-GN-A8LL-06  
TCGA-EE-A3JI-06  
TCGA-YG-AA3P-06  
TCGA-EE-A29I-06  
TCGA-W3-AA2I-06  
TCGA-EE-A20C-06  
TCGA-FS-A1ZJ-06  
TCGA-GN-A4U7-06  
TCGA-D3-A1O1-06  
TCGA-ER-A3ES-06  
TCGA-EE-A3AD-06  
TCGA-FS-A1ZY-06  
TCGA-EE-A185-06  
TCGA-D3-A8GP-06  
TCGA-EE-A29B-06  
TCGA-D3-A8GC-06  
TCGA-D3-A5GL-06  
TCGA-FS-A1ZG-06  
TCGA-FS-A4F5-06  
TCGA-EE-A3AH-06  
TCGA-DA-A1IA-06  
TCGA-D9-A4Z6-06  
TCGA-D3-A3C6-06  
TCGA-FS-A4FB-06  
TCGA-FR-A7U8-06  
TCGA-D9-A6EG-06  
TCGA-GN-A8LK-06  
TCGA-FR-A8YD-06  
TCGA-FS-A1ZU-06  
TCGA-ER-A19F-06  
TCGA-EE-A2A5-06  
TCGA-RP-A690-06  
TCGA-FS-A1ZK-06  
TCGA-GN-A268-06  
TCGA-D3-A8GK-06  
TCGA-EE-A20H-06  
TCGA-D3-A8GV-06  
TCGA-DA-A95W-06  
TCGA-W3-A824-06  
TCGA-D3-A8GF-06  
TCGA-D3-A8GI-06  
TCGA-WE-A8ZO-06  
TCGA-EE-A2MM-06  
TCGA-EE-A2GO-06  
TCGA-FW-A3I3-06  
TCGA-EE-A29A-06  
TCGA-EE-A69F-06  
TCGA-WE-A8K6-06  
TCGA-EE-A180-06  
TCGA-D3-A1QA-06  
TCGA-EE-A17Z-06  
TCGA-FS-A1ZC-06  
TCGA-WE-A8ZM-06  
TCGA-3N-A9WB-06  
TCGA-FS-A1Z3-06  
TCGA-FS-A4F9-06  
TCGA-WE-A8JZ-06  
TCGA-DA-A95Z-06  
TCGA-EE-A29D-06  
TCGA-D9-A6EC-06  
TCGA-D3-A3MO-06  
TCGA-FS-A4F0-06  
TCGA-FS-A1YW-06  
TCGA-D3-A1QA-07  
TCGA-LH-A9QB-06  
TCGA-EE-A3J8-06  
TCGA-FS-A1ZE-06  
TCGA-D9-A1X3-06  
TCGA-EE-A3J7-06  
TCGA-EE-A2GR-06  
TCGA-ER-A19I-06  
TCGA-D3-A1O5-06  
TCGA-ER-A42K-06

# CDH13

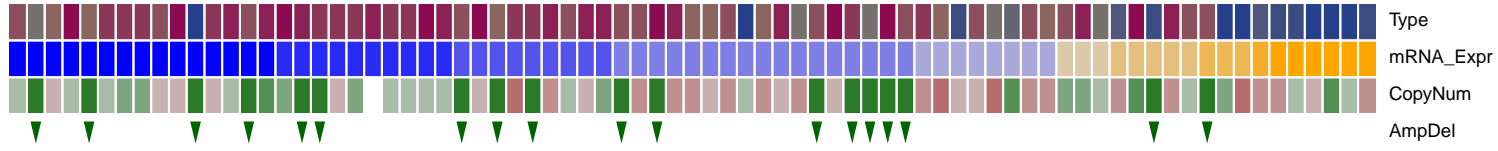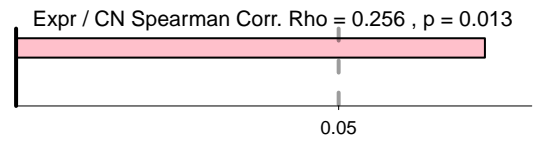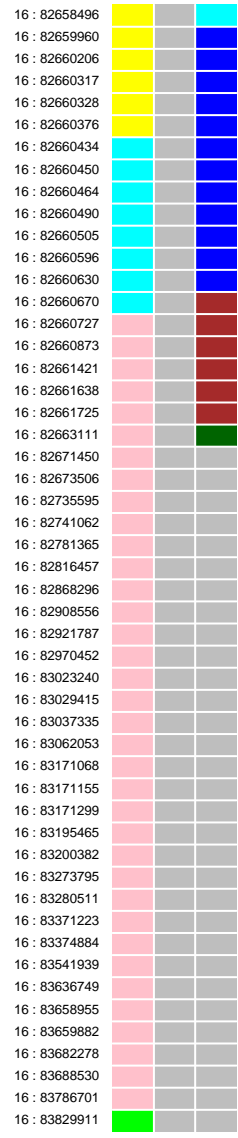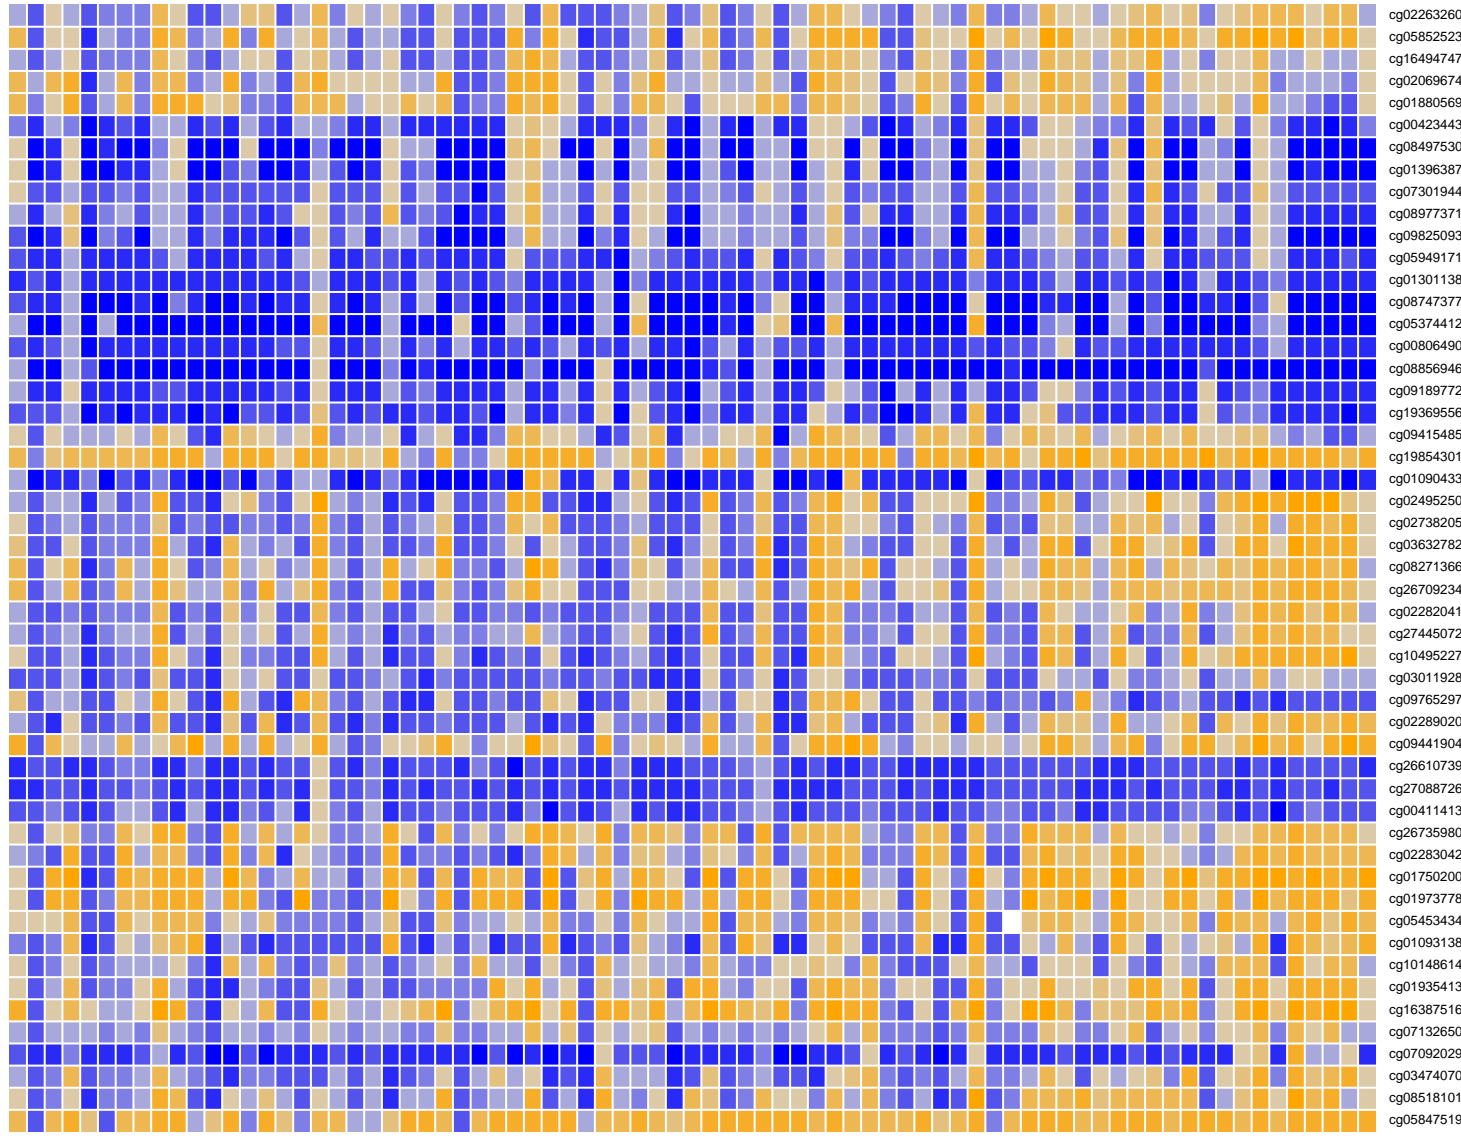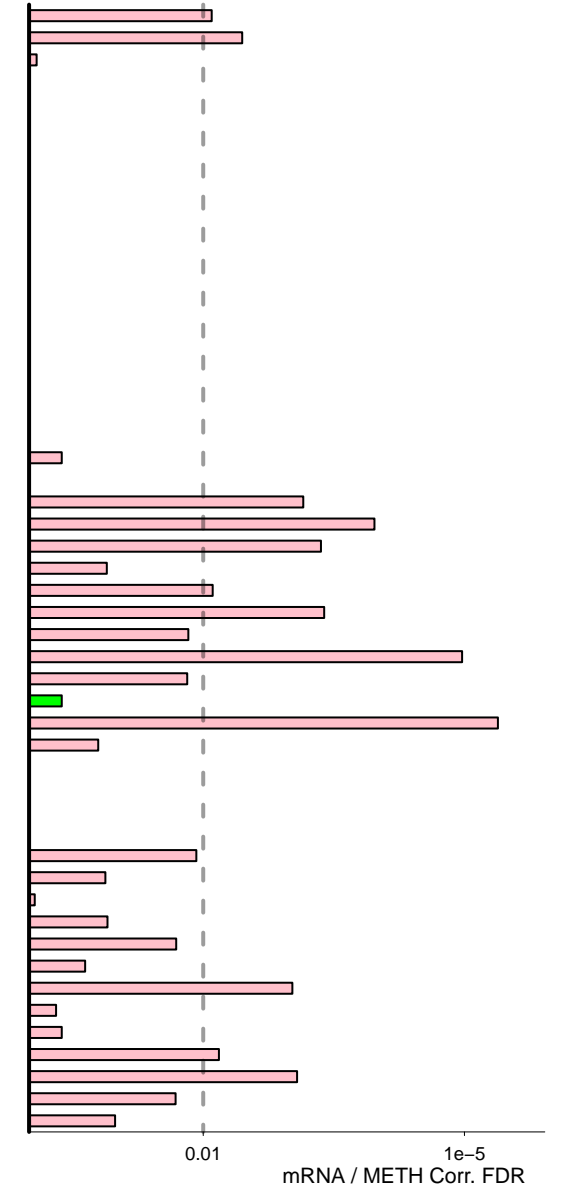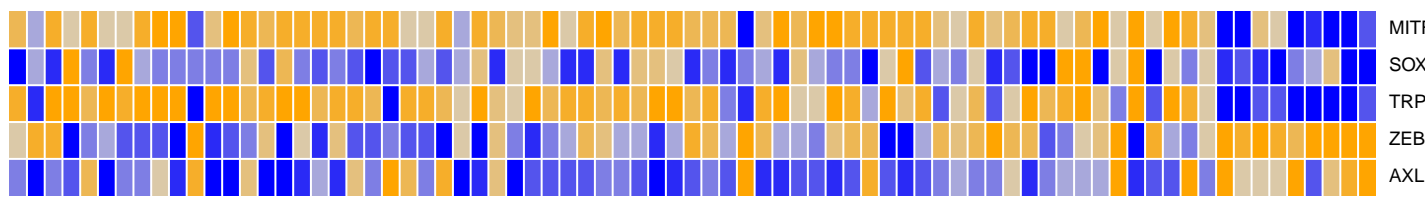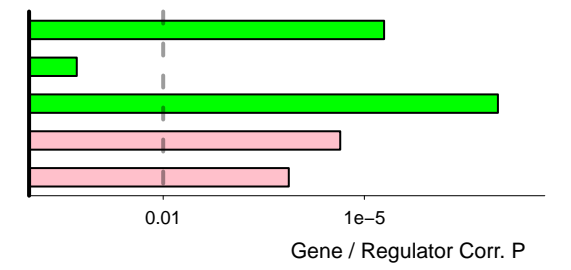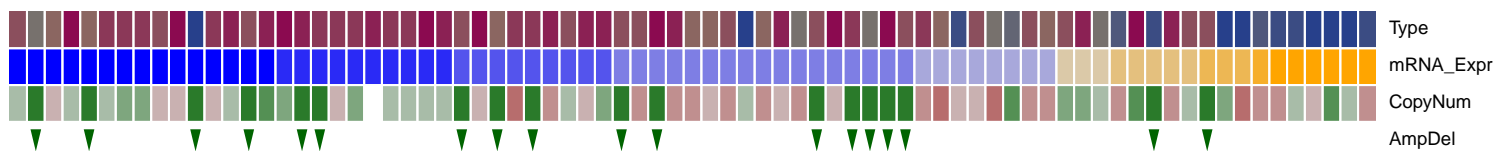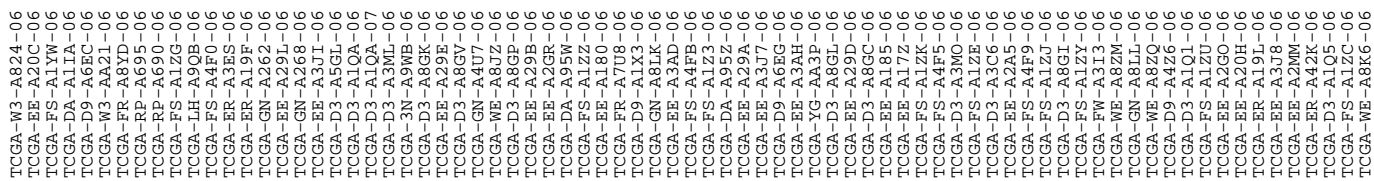

# RAB27B

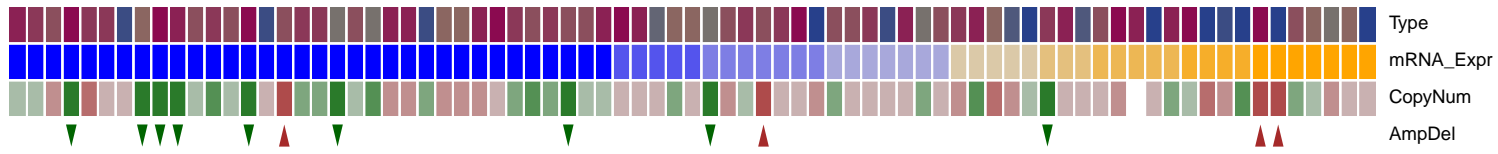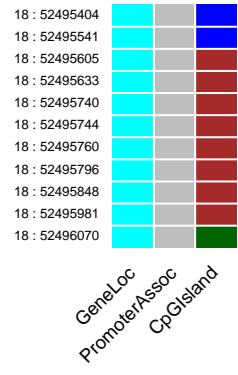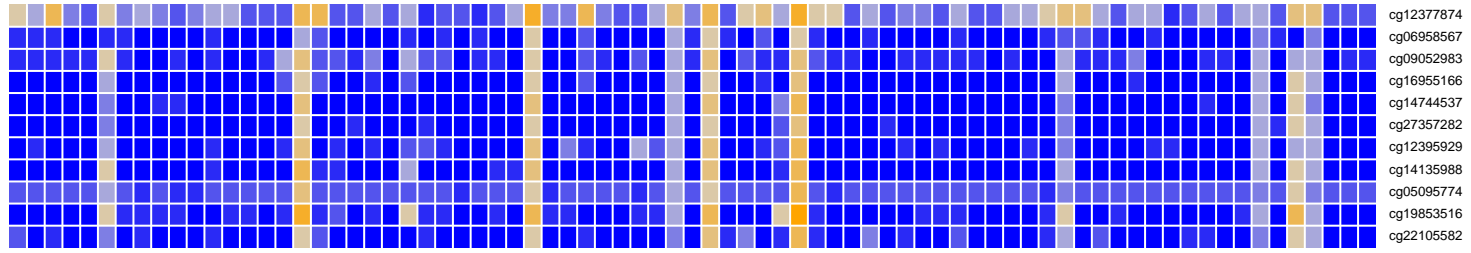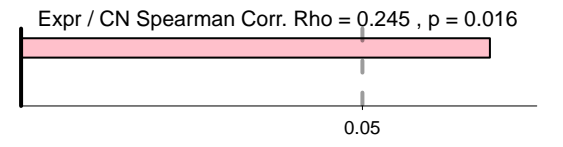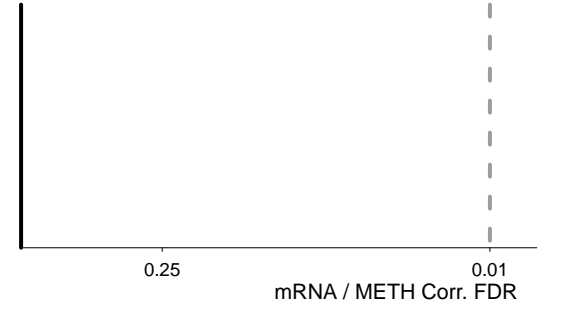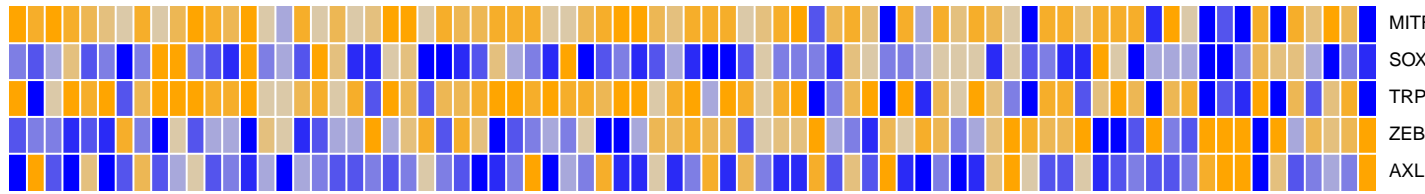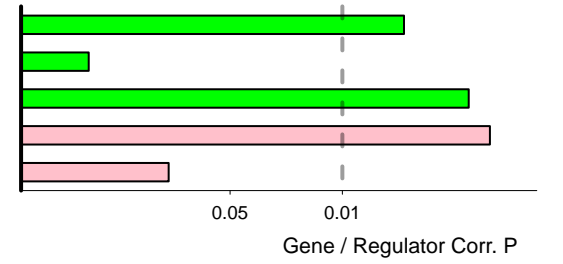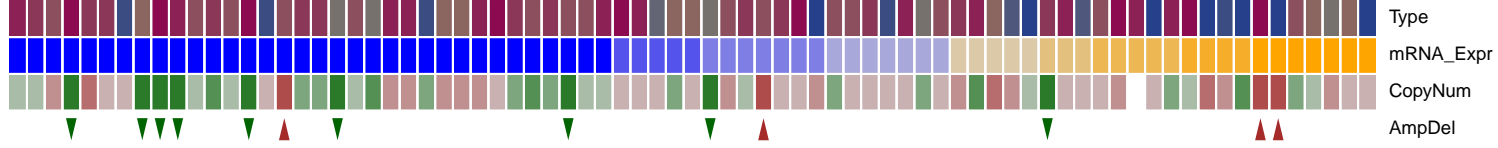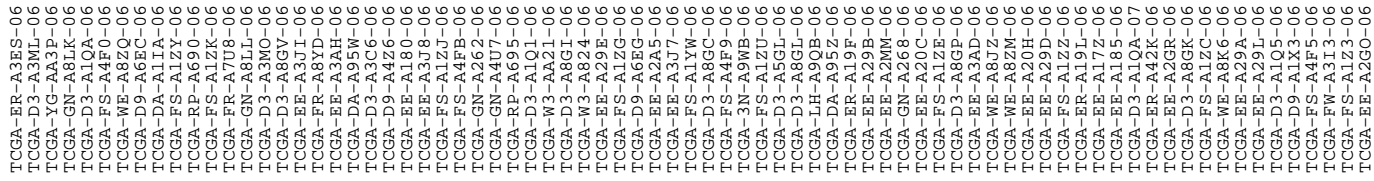

# VEGFC

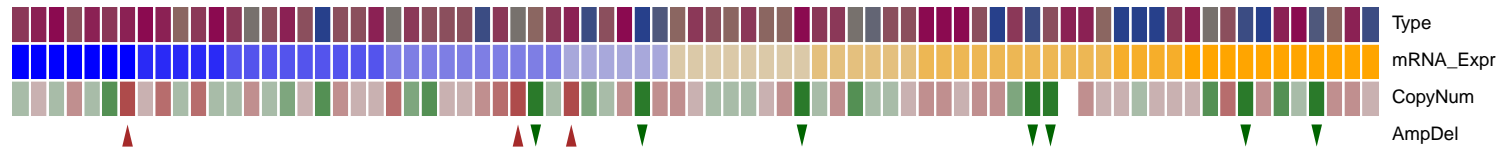

4 : 177715040  
 4 : 177714456  
 4 : 177714373  
 4 : 177714350  
 4 : 177713813  
 4 : 177713423  
 4 : 177713244  
 4 : 177713180  
 4 : 177673704  
 4 : 177648950  
 4 : 177640279  
 4 : 177630793

GeneLoc  
 PromoterAssoc  
 CpGIsland

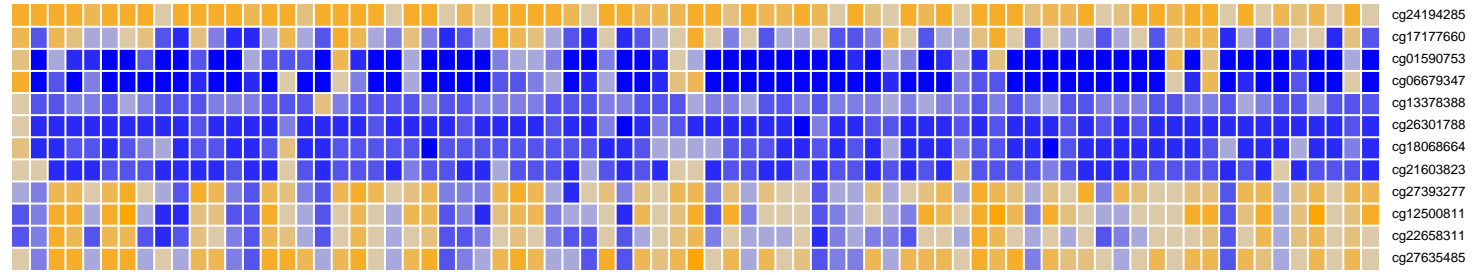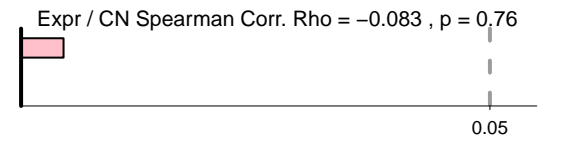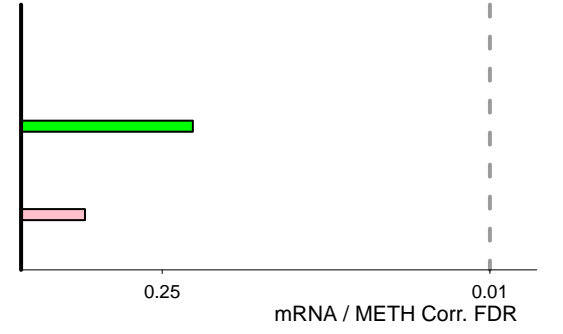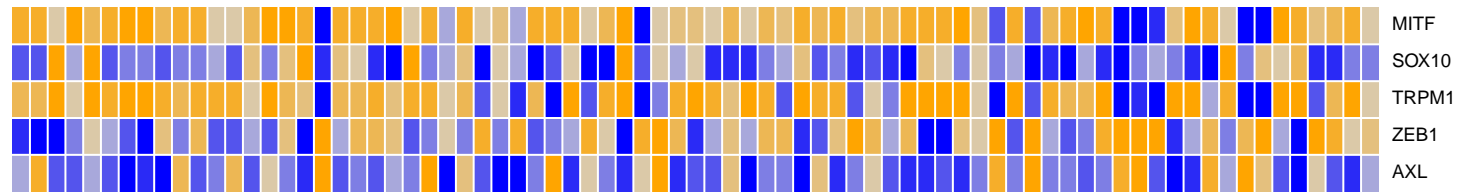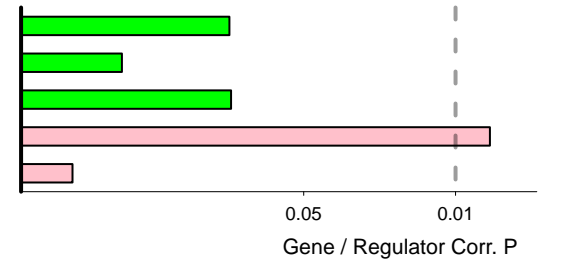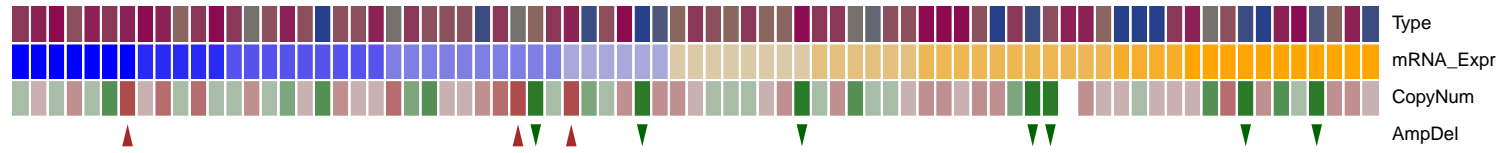

TCGA-EE-A3JI-06  
 TCGA-EE-A29E-06  
 TCGA-DA-A1IA-06  
 TCGA-YG-AA3P-06  
 TCGA-FS-A1ZY-06  
 TCGA-FS-A1ZK-06  
 TCGA-ER-A3ES-06  
 TCGA-FS-A1ZG-06  
 TCGA-GN-A262-06  
 TCGA-D9-A6EC-06  
 TCGA-EE-A29D-06  
 TCGA-D3-A8GK-06  
 TCGA-3M-A9WB-06  
 TCGA-EE-A3AH-06  
 TCGA-EP-A690-06  
 TCGA-EE-A180-06  
 TCGA-EE-A17Z-06  
 TCGA-EE-A2G0-06  
 TCGA-D9-A1X3-06  
 TCGA-FS-A1ZE-06  
 TCGA-FS-A1ZZ-06  
 TCGA-FW-A3I3-06  
 TCGA-FR-A8YD-06  
 TCGA-D3-A1Q1-06  
 TCGA-D3-A8GV-06  
 TCGA-ER-A19F-06  
 TCGA-WE-A8ZQ-06  
 TCGA-D3-A8GP-06  
 TCGA-EE-A20C-06  
 TCGA-FS-A1ZJ-06  
 TCGA-EE-A3AD-06  
 TCGA-EE-A3J8-06  
 TCGA-W3-A824-06  
 TCGA-GN-A8LI-06  
 TCGA-EE-A20H-06  
 TCGA-WE-A8ZM-06  
 TCGA-EE-A3J7-06  
 TCGA-EE-A29B-06  
 TCGA-DA-A95W-06  
 TCGA-WE-A8JZ-06  
 TCGA-W3-AA21-06  
 TCGA-FS-A1Z3-06  
 TCGA-FS-A4F5-06  
 TCGA-GN-A8LK-06  
 TCGA-D3-A1O8-06  
 TCGA-D3-A5GI-06  
 TCGA-D2-A3C6-06  
 TCGA-EE-A2A5-06  
 TCGA-DA-A95Z-06  
 TCGA-FS-A4F9-06  
 TCGA-GN-A4U7-06  
 TCGA-EE-A185-06  
 TCGA-D3-A8GL-06  
 TCGA-FS-A1ZU-06  
 TCGA-LH-A9QB-06  
 TCGA-RP-A695-06  
 TCGA-WE-A8K6-06  
 TCGA-FR-A7U8-06  
 TCGA-D3-A1QA-07  
 TCGA-EE-A2GR-06  
 TCGA-FS-A1YW-06  
 TCGA-EE-A29A-06  
 TCGA-ER-A42K-06  
 TCGA-FS-A4F0-06  
 TCGA-D9-A6EG-06  
 TCGA-D3-A8GC-06  
 TCGA-D3-A8GI-06  
 TCGA-EE-A2MM-06  
 TCGA-D3-A1Q5-06  
 TCGA-D9-A4Z6-06  
 TCGA-EE-A29I-06  
 TCGA-ER-A191-06  
 TCGA-FS-A4FB-06  
 TCGA-GN-A268-06  
 TCGA-D3-A3M0-06

# DPYD

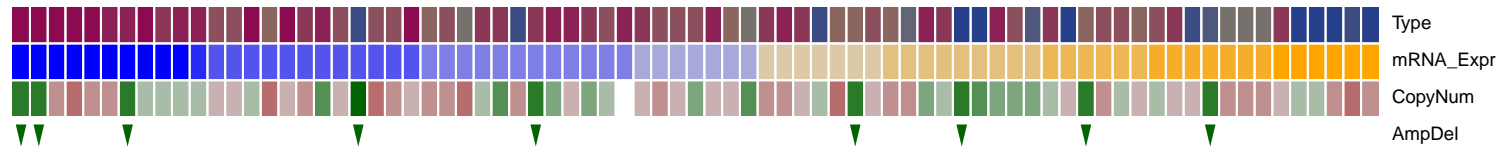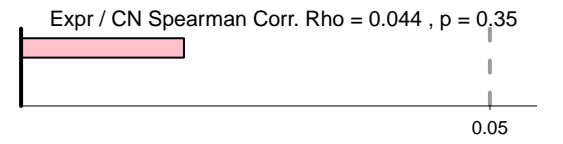

1: 98386915  
 1: 98386913  
 1: 98386766  
 1: 98386723  
 1: 98386697  
 1: 98386683  
 1: 98386452  
 1: 98386435  
 1: 98386209  
 1: 98383686  
 1: 98336448  
 1: 98088314  
 1: 98036695  
 1: 98031839  
 1: 97833212  
 1: 97737509  
 1: 97706031  
 1: 97610703  
 1: 97604182  
 1: 97584888  
 1: 97565426  
 1: 97559808

GeneLoc  
 PromoterAssoc  
 CpGIsland

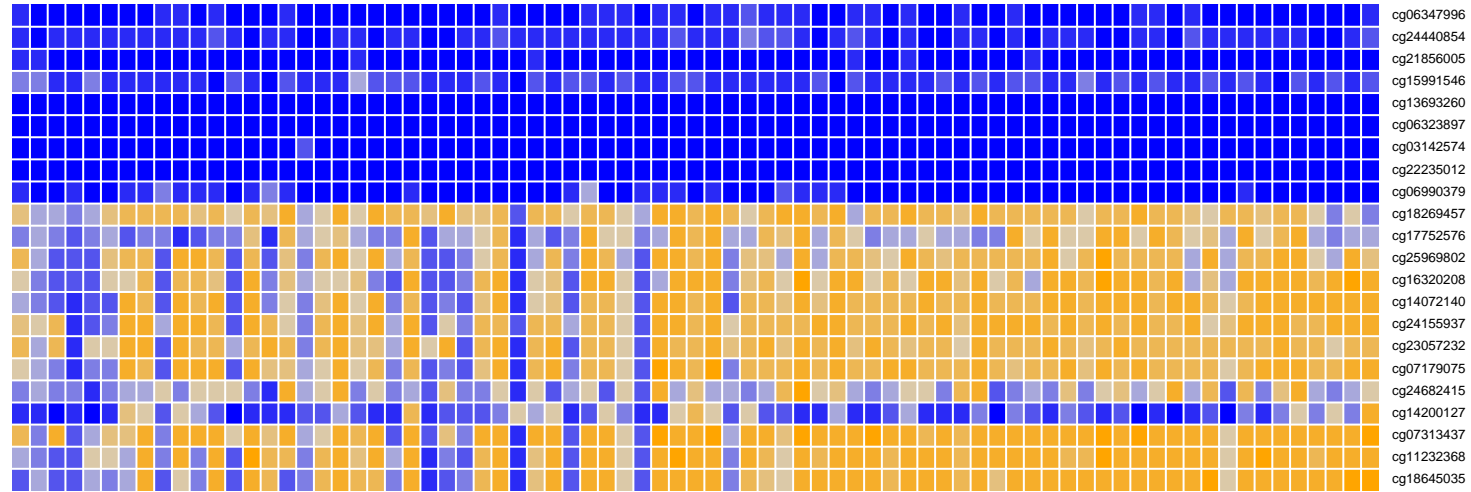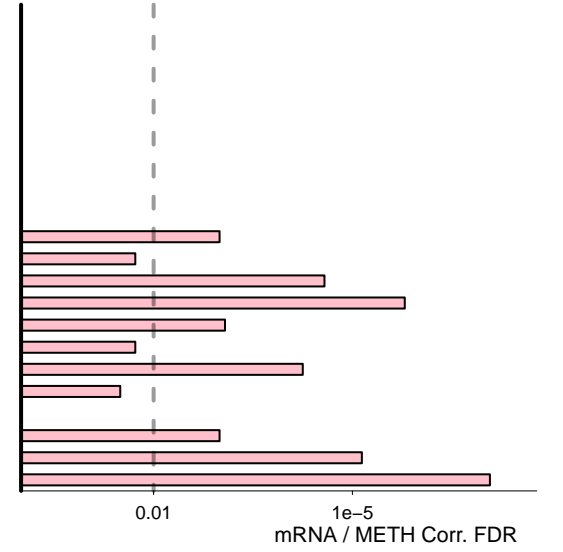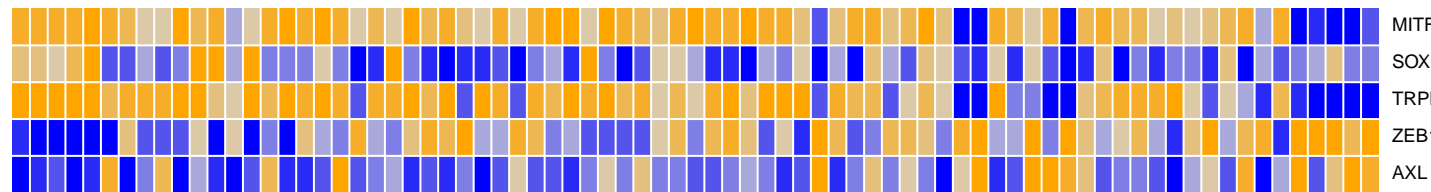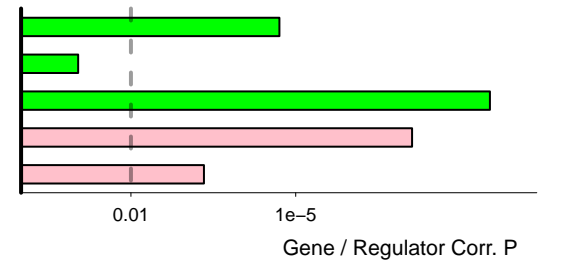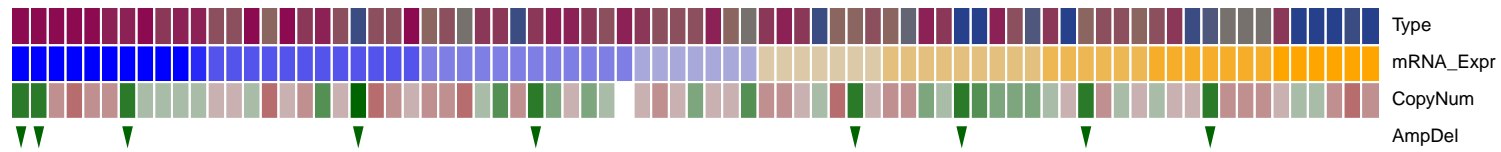

TCGA-GN-A8LK-06  
 TCGA-GN-A4U7-06  
 TCGA-EE-A185-06  
 TCGA-EE-A291-06  
 TCGA-GN-A8LL-06  
 TCGA-EE-A29E-06  
 TCGA-GN-A262-06  
 TCGA-D3-A8GK-06  
 TCGA-3N-A9WB-06  
 TCGA-ER-A3ES-06  
 TCGA-FS-A1ZY-06  
 TCGA-D3-A8GV-06  
 TCGA-DA-A1IA-06  
 TCGA-D9-A6EC-06  
 TCGA-FS-A1ZG-06  
 TCGA-D3-A5GL-06  
 TCGA-D9-A4Z6-06  
 TCGA-D3-A1Q1-06  
 TCGA-WE-A8ZQ-06  
 TCGA-FR-A7U8-06  
 TCGA-D3-A8GL-06  
 TCGA-FS-A4FB-06  
 TCGA-D3-A3C6-06  
 TCGA-FS-A4F9-06  
 TCGA-W3-AA21-06  
 TCGA-FS-A1ZK-06  
 TCGA-EE-A3J8-06  
 TCGA-EE-A29D-06  
 TCGA-EE-A2GR-06  
 TCGA-D9-A6EG-06  
 TCGA-FR-A8YD-06  
 TCGA-RP-A690-06  
 TCGA-D3-A1QA-07  
 TCGA-D3-A1QA-06  
 TCGA-FS-A1ZU-06  
 TCGA-FS-A1ZE-06  
 TCGA-YG-AA3P-06  
 TCGA-FS-A1ZZ-06  
 TCGA-FS-A1YW-06  
 TCGA-FW-A3I3-06  
 TCGA-RP-A695-06  
 TCGA-EE-A29B-06  
 TCGA-EE-A298-06  
 TCGA-WE-A8K6-06  
 TCGA-EE-A3J7-06  
 TCGA-FS-A1ZI-06  
 TCGA-ER-A19F-06  
 TCGA-FS-A4F5-06  
 TCGA-EE-A2A5-06  
 TCGA-EE-A180-06  
 TCGA-D3-A8GP-06  
 TCGA-EE-A20H-06  
 TCGA-EE-A2GO-06  
 TCGA-EE-A3AD-06  
 TCGA-DA-A95Z-06  
 TCGA-WE-A8ZM-06  
 TCGA-D3-A3ML-06  
 TCGA-FS-A1ZC-06  
 TCGA-WE-A8JZ-06  
 TCGA-D9-A1X3-06  
 TCGA-W3-A824-06  
 TCGA-FS-A1Z3-06  
 TCGA-DA-A95W-06  
 TCGA-FS-A4F0-06  
 TCGA-D3-A3MO-06  
 TCGA-ER-A191-06  
 TCGA-EE-A3AH-06  
 TCGA-D3-A8GC-06  
 TCGA-EE-A20C-06  
 TCGA-EE-A3JI-06  
 TCGA-EE-A29A-06  
 TCGA-ER-A42K-06  
 TCGA-D3-A1O5-06  
 TCGA-EE-A2MM-06  
 TCGA-LH-A9QB-06

# THSD4

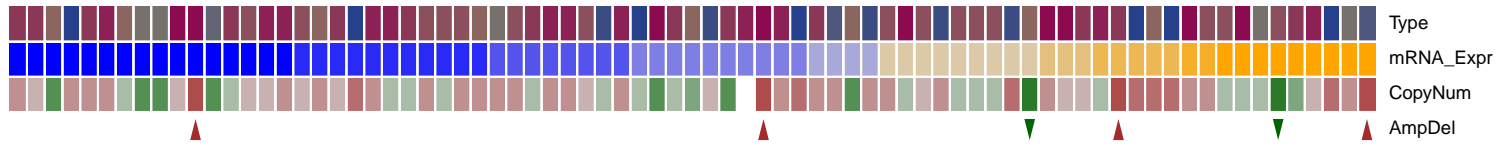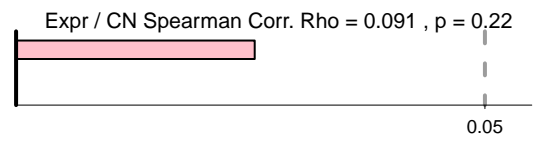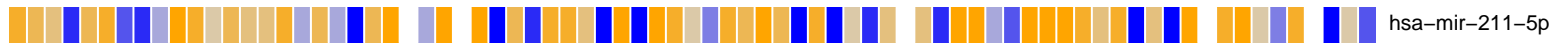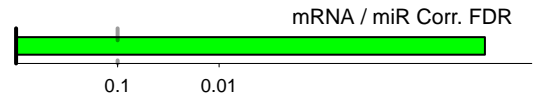

15 : 71398102  
15 : 71401960  
15 : 71404101  
15 : 71406783  
15 : 71407484  
15 : 71407670  
15 : 71407757  
15 : 71407798  
15 : 71408080  
15 : 71408291  
15 : 71408366  
15 : 71408603  
15 : 71408776  
15 : 71408847  
15 : 71408914  
15 : 71409751  
15 : 71409997  
15 : 71410605  
15 : 71414463  
15 : 71417947  
15 : 71428996  
15 : 71432294  
15 : 71433723  
15 : 71479333  
15 : 71491485  
15 : 71492746  
15 : 71496545  
15 : 71504159  
15 : 71507071  
15 : 71507686  
15 : 71507695  
15 : 71509120  
15 : 71512712  
15 : 71519190  
15 : 71520142  
15 : 71544038  
15 : 71545664  
15 : 71554492  
15 : 71573101  
15 : 71573997  
15 : 71586893  
15 : 71595576  
15 : 71606395  
15 : 71608715  
15 : 71616585  
15 : 71623290  
15 : 71627379  
15 : 71629208  
15 : 71630714  
15 : 71641850  
15 : 71646079  
15 : 71649307  
15 : 71657141  
15 : 71679485  
15 : 71685353  
15 : 71691967  
15 : 71704440  
15 : 71717382  
15 : 71736038  
15 : 71738168  
15 : 71740833  
15 : 71776870  
15 : 71787471  
15 : 71800893  
15 : 71804736  
15 : 71840098  
15 : 71999487  
15 : 72009031  
15 : 72020560  
15 : 72020908  
15 : 72022092  
15 : 72045301  
15 : 72071616  
15 : 72072813

GeneLoc  
Promoter/Assoc  
CpGIsland

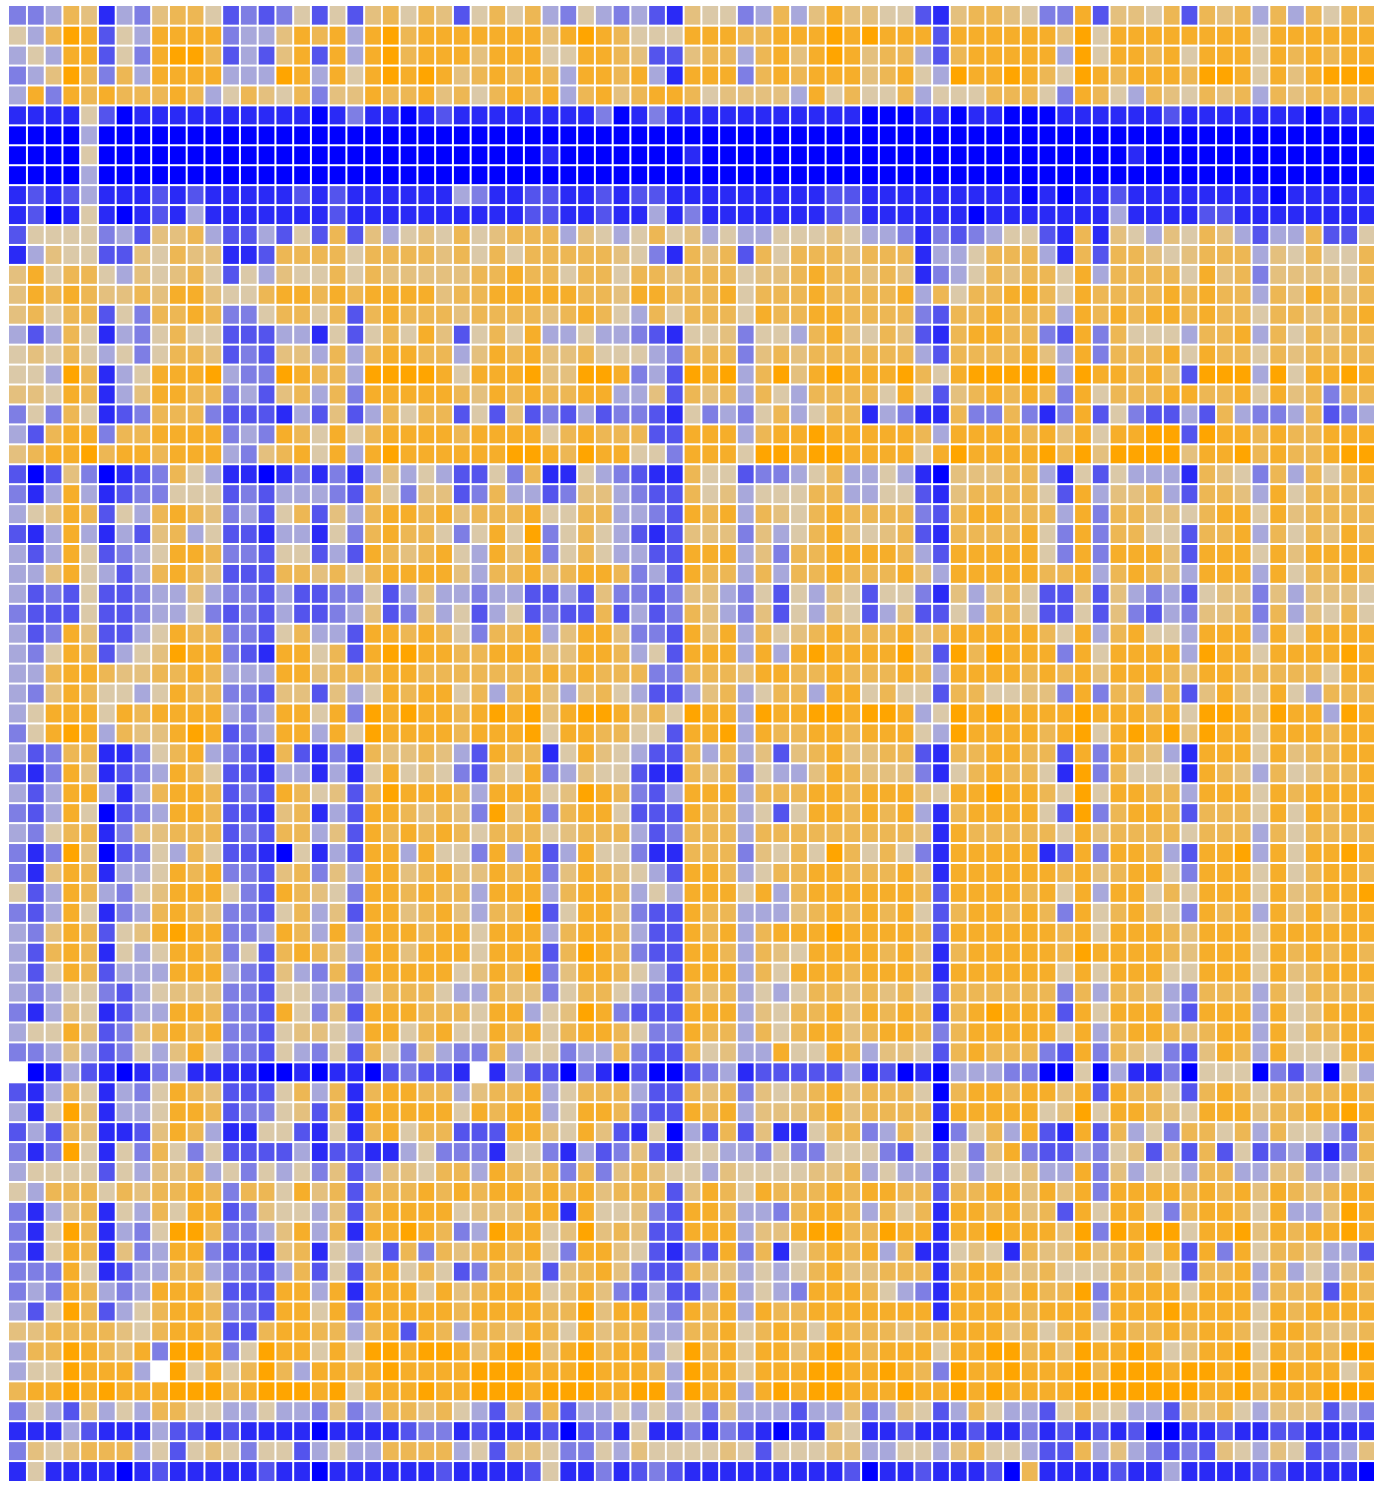

cg13795321  
cg10837312  
cg22948791  
cg05415308  
cg00316759  
cg13785883  
cg18088653  
cg04988206  
cg22253838  
cg13125884  
cg12637920  
cg18581173  
cg04963480  
cg12599673  
cg02694099  
cg26401166  
cg07097876  
cg12950645  
cg16447823  
cg17007374  
cg26579550  
cg18540794  
cg21758451  
cg03454017  
cg13594465  
cg00107890  
cg09493290  
cg22735650  
cg02034168  
cg21410276  
cg17311074  
cg23511079  
cg26964544  
cg07016095  
cg23625341  
cg05310046  
cg15837279  
cg03832737  
cg13994680  
cg24957704  
cg17859502  
cg21573135  
cg01907071  
cg22192089  
cg11962971  
cg26589665  
cg01327313  
cg01083652  
cg21759907  
cg06720578  
cg22694813  
cg27235366  
cg01354588  
cg19634315  
cg13191951  
cg09262504  
cg17882867  
cg03472130  
cg14080982  
cg12354961  
cg04631994  
cg13327171  
cg03441710  
cg09274392  
cg23336695  
cg05337779  
cg00435692  
cg16981615  
cg04616566  
cg14283939  
cg18721742  
cg27449507  
cg24314662  
cg05739476

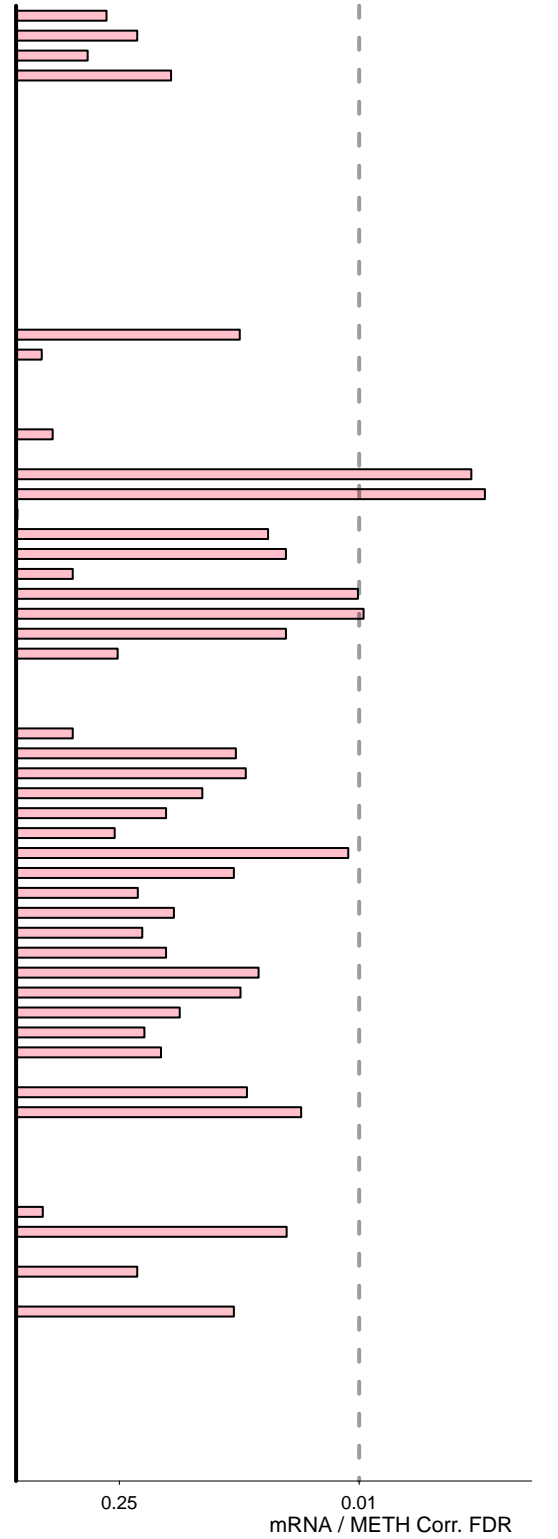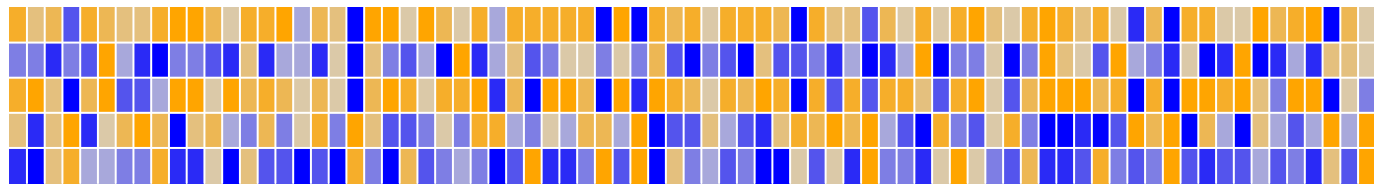

MITF  
SOX10  
TRPM1  
ZEB1  
AXL

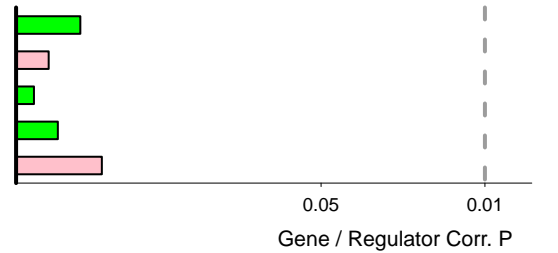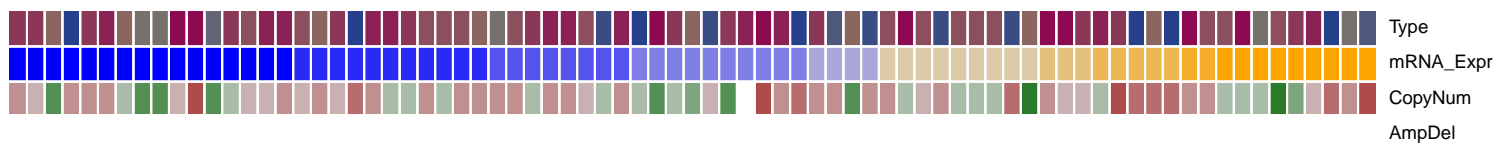

TCGA-D3-A5GL-06  
TCGA-FS-A4F0-06  
TCGA-WE-A8JZ-06  
TCGA-LH-A90B-06  
TCGA-EE-A3JI-06  
TCGA-FS-A1ZY-06  
TCGA-FS-A4F5-06  
TCGA-D3-A3C6-06  
TCGA-D3-A8GC-06  
TCGA-FS-A1ZC-06  
TCGA-D3-A8GI-06  
TCGA-EE-A2A5-06  
TCGA-M3-AA21-06  
TCGA-RR-A19F-06  
TCGA-EE-A2GE-06  
TCGA-FS-A1ZZ-06  
TCGA-D3-A8GV-06  
TCGA-FS-A8EP-06  
TCGA-D3-A8EP-06  
TCGA-FS-A1ZC-06  
TCGA-EE-A180-06  
TCGA-ER-A3ES-06  
TCGA-IN-A9WB-06  
TCGA-XG-AA3P-06  
TCGA-W3-A824-06  
TCGA-FS-A1YW-06  
TCGA-EE-A20C-06  
TCGA-D9-A1X3-06  
TCGA-D3-A3ML-06  
TCGA-GN-A268-06  
TCGA-EE-A3AD-06  
TCGA-FS-A1ZE-06  
TCGA-EE-A2MM-06  
TCGA-D9-A4Z6-06  
TCGA-EE-A29A-06  
TCGA-EE-A29L-06  
TCGA-D3-A10A-06  
TCGA-FS-A1ZJ-06  
TCGA-D3-A3MO-06  
TCGA-FS-A1ZK-06  
TCGA-D3-A10A-07  
TCGA-GN-A8LK-06  
TCGA-EE-A262-06  
TCGA-EE-A20H-06  
TCGA-EE-A29D-06  
TCGA-RR-A19I-06  
TCGA-EE-A3I7-06  
TCGA-WE-A8Y6-06  
TCGA-RR-A7I8-06  
TCGA-D3-A8ZK-06  
TCGA-EE-A17Z-06  
TCGA-EE-A3J6-06  
TCGA-D3-A1Q1-06  
TCGA-RP-A690-06  
TCGA-FS-A1ZU-06  
TCGA-WE-A8ZQ-06  
TCGA-D9-A6EC-06  
TCGA-GN-A8LL-06  
TCGA-GN-A4U7-06  
TCGA-EE-A29B-06  
TCGA-EE-A29E-06  
TCGA-RR-A8XD-06  
TCGA-ER-A42K-06  
TCGA-FS-A1Z3-06  
TCGA-EE-A260-06  
TCGA-EE-A185-06  
TCGA-FS-A4F9-06  
TCGA-DA-A95W-06  
TCGA-DA-A1IA-06  
TCGA-FW-A3I3-06  
TCGA-DA-A95Z-06  
TCGA-RP-A695-06  
TCGA-D9-A6EG-06  
TCGA-D3-A105-06  
TCGA-EE-A3AH-06  
TCGA-WE-A8ZM-06

Type  
mRNA\_Expr  
CopyNum  
AmpDel

# COL6A2

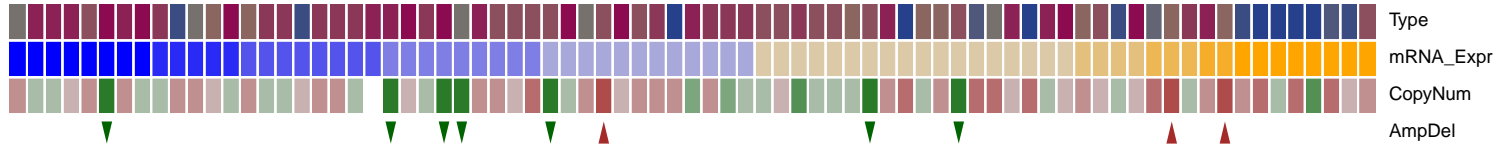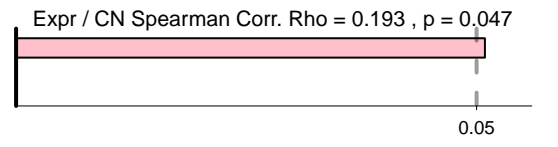

21 : 47517484  
 21 : 47517690  
 21 : 47518068  
 21 : 47518747  
 21 : 47518998  
 21 : 47519444  
 21 : 47530705  
 21 : 47530767  
 21 : 47531945  
 21 : 47532167  
 21 : 47532333  
 21 : 47532820  
 21 : 47533197  
 21 : 47536647  
 21 : 47541643  
 21 : 47544366  
 21 : 47545200  
 21 : 47545588  
 21 : 47545624  
 21 : 47546030  
 21 : 47546211  
 21 : 47548991  
 21 : 47549369  
 21 : 47551108  
 21 : 47551220  
 21 : 47551987  
 21 : 47552084  
 21 : 47552112  
 21 : 47552343  
 21 : 47552628

GeneLoc  
 PromoterAssoc  
 CpIsland

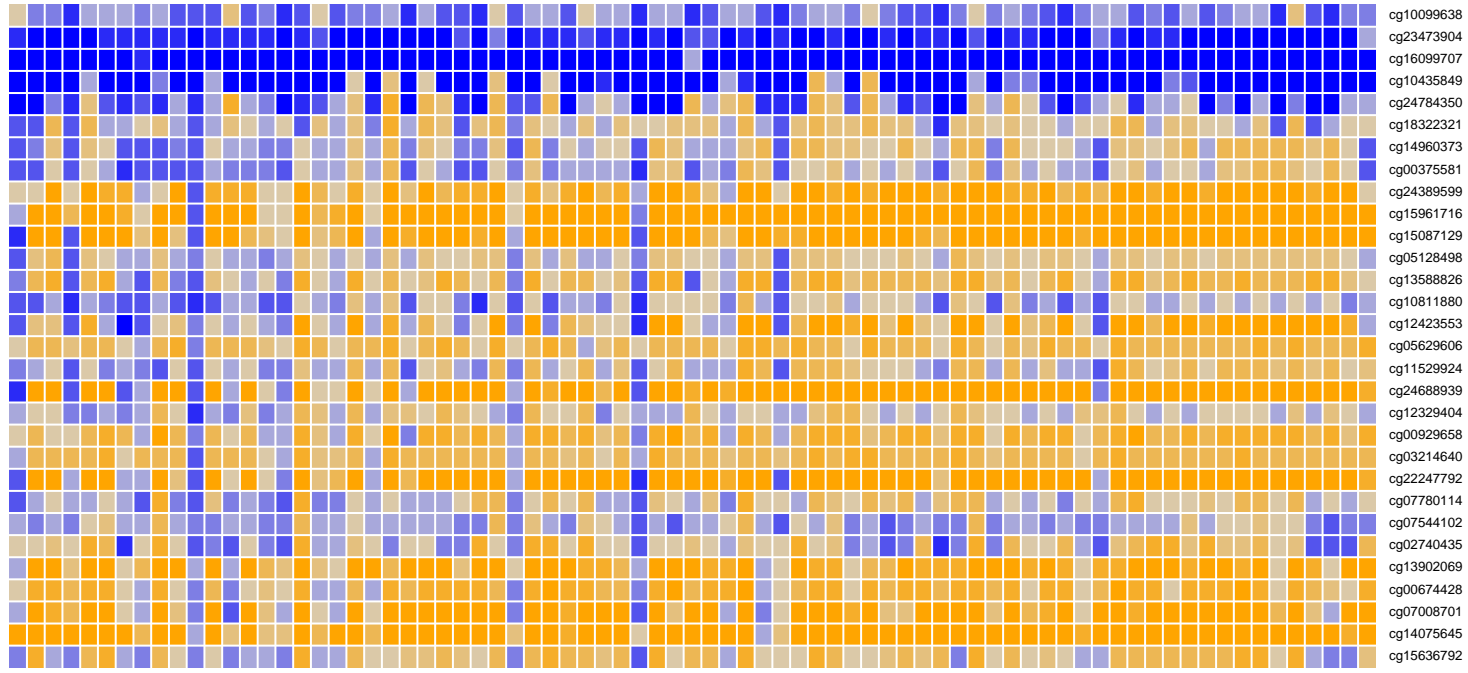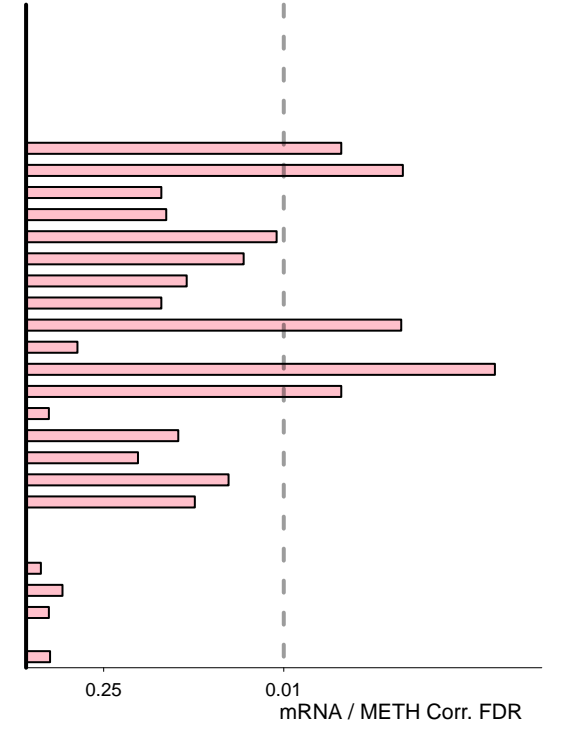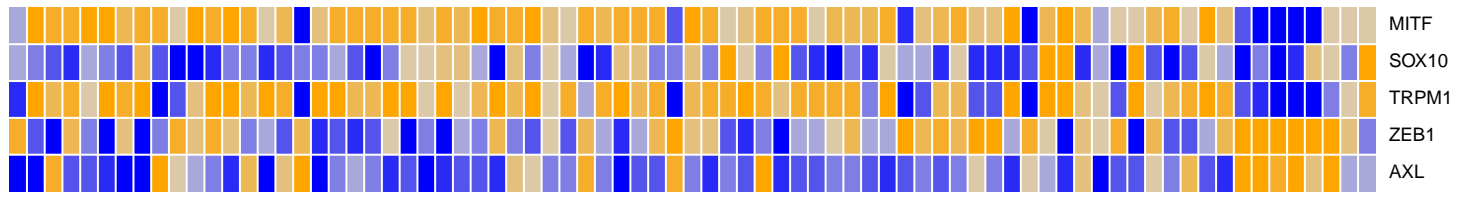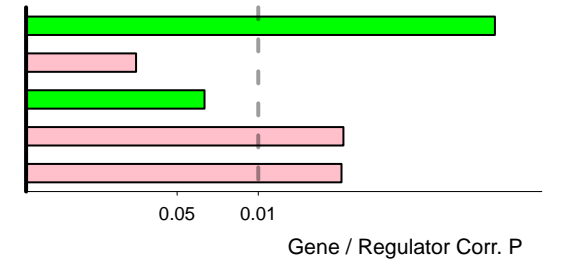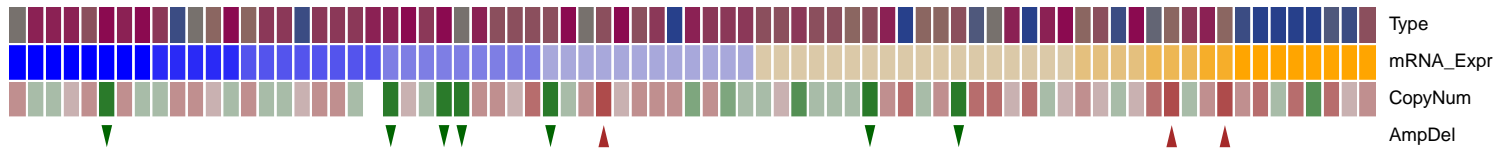

TCGA-EE-A20C-06  
 TCGA-ER-A3ES-06  
 TCGA-EE-A29E-06  
 TCGA-FS-A1Z2-06  
 TCGA-YG-AA3P-06  
 TCGA-FS-A1ZG-06  
 TCGA-GN-A262-06  
 TCGA-EE-A29L-06  
 TCGA-D3-A3ML-06  
 TCGA-EE-A3JL-06  
 TCGA-FW-A3I3-06  
 TCGA-FS-A1YM-06  
 TCGA-D3-A8GL-06  
 TCGA-D9-A6BC-06  
 TCGA-W3-AA21-06  
 TCGA-D3-A1QA-06  
 TCGA-EE-A2M0-06  
 TCGA-FS-A4T0-06  
 TCGA-FP-A6S5-06  
 TCGA-EE-A3J1-06  
 TCGA-D3-A1QA-07  
 TCGA-GN-A288-06  
 TCGA-EE-A185-06  
 TCGA-D3-A8GP-06  
 TCGA-EE-A3AH-06  
 TCGA-EE-A2GR-06  
 TCGA-FS-A4F9-06  
 TCGA-ER-A19F-06  
 TCGA-RP-A690-06  
 TCGA-FS-A1ZU-06  
 TCGA-D3-A8GK-06  
 TCGA-FR-A7U8-06  
 TCGA-GN-A8LK-06  
 TCGA-D9-A1X3-06  
 TCGA-EE-A29D-06  
 TCGA-LH-A9OB-06  
 TCGA-EE-A180-06  
 TCGA-D3-A5GL-06  
 TCGA-FR-A8YD-06  
 TCGA-EE-A29B-06  
 TCGA-D3-A1O1-06  
 TCGA-EE-A1Z-06  
 TCGA-FS-A1ZK-06  
 TCGA-DA-A95W-06  
 TCGA-W3-A824-06  
 TCGA-FS-A1Z-06  
 TCGA-DA-A95Z-06  
 TCGA-DA-A95Z-06  
 TCGA-EE-A3ND-06  
 TCGA-EE-A4ZK-06  
 TCGA-FS-A4F5-06  
 TCGA-FS-A4FB-06  
 TCGA-FS-A1ZF-06  
 TCGA-ER-A19L-06  
 TCGA-D3-A3C6-06  
 TCGA-D9-A6EG-06  
 TCGA-EE-A20H-06  
 TCGA-FS-A1ZY-06  
 TCGA-GN-A8LL-06  
 TCGA-WE-A8JZ-06  
 TCGA-D3-A8GV-06  
 TCGA-WE-A8ZQ-06  
 TCGA-DA-A1IA-06  
 TCGA-EE-A2A5-06  
 TCGA-FS-A1ZJ-06  
 TCGA-3N-A9WB-06  
 TCGA-D9-A4Z6-06  
 TCGA-EE-A3J7-06  
 TCGA-WE-A8K6-06  
 TCGA-EE-A29A-06  
 TCGA-FS-A1ZC-06  
 TCGA-EE-A2GO-06  
 TCGA-D3-A1O5-06  
 TCGA-WE-A8ZM-06  
 TCGA-D3-A3M0-06  
 TCGA-D3-A8GI-06



# DKK3

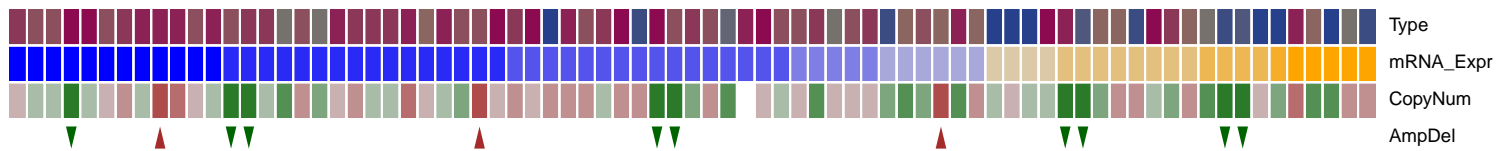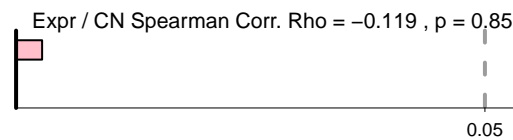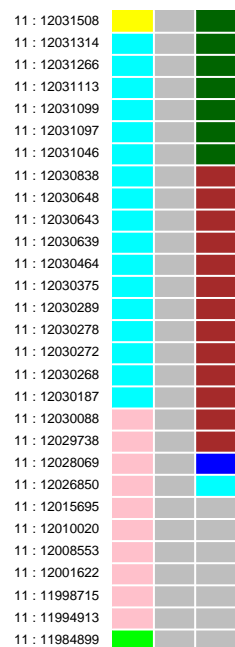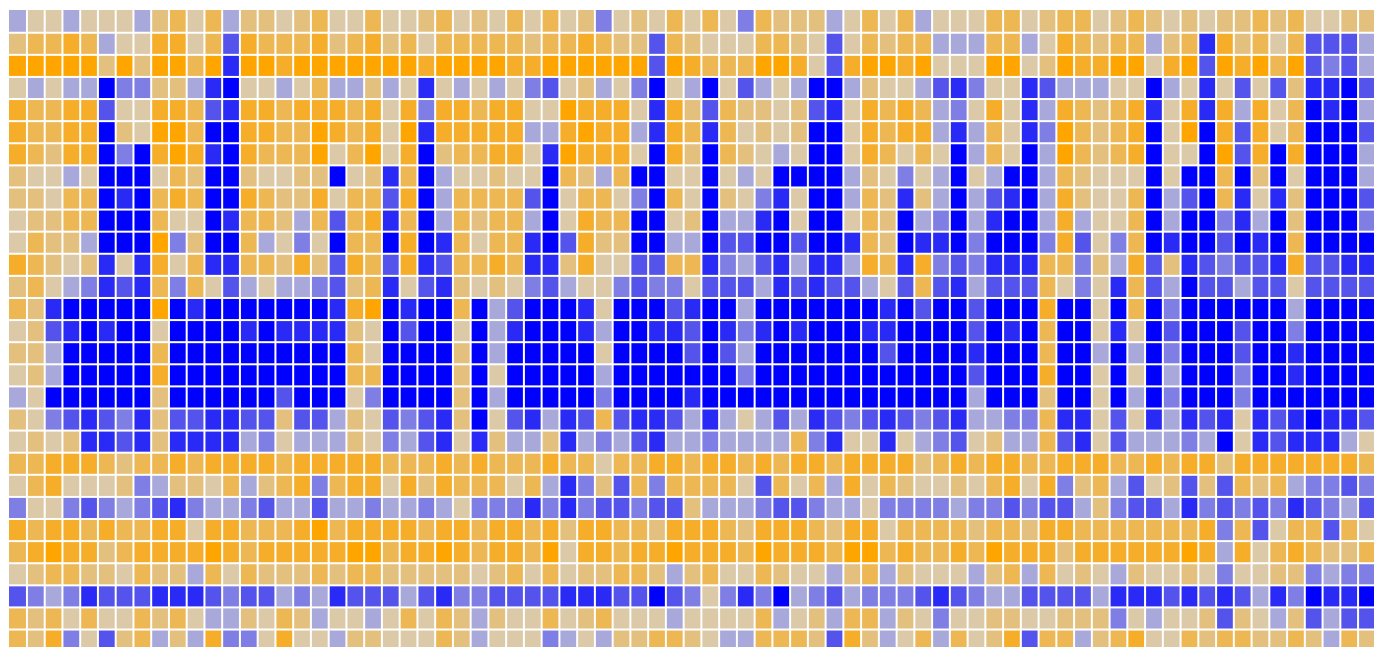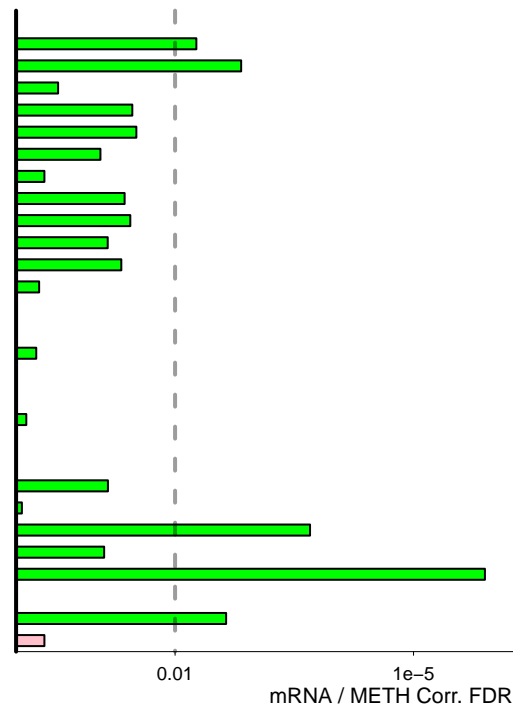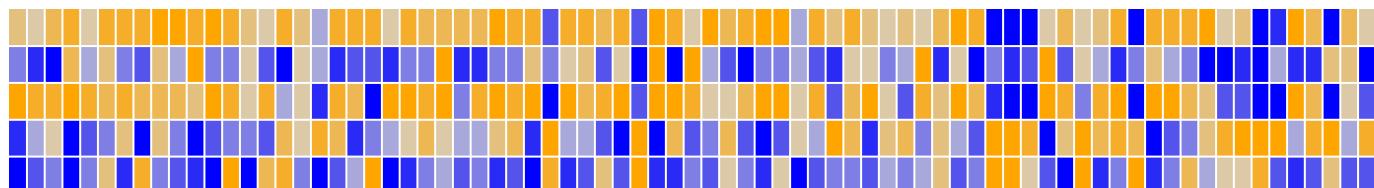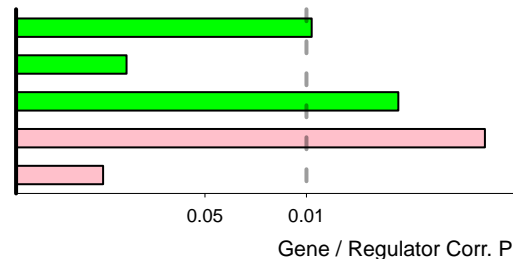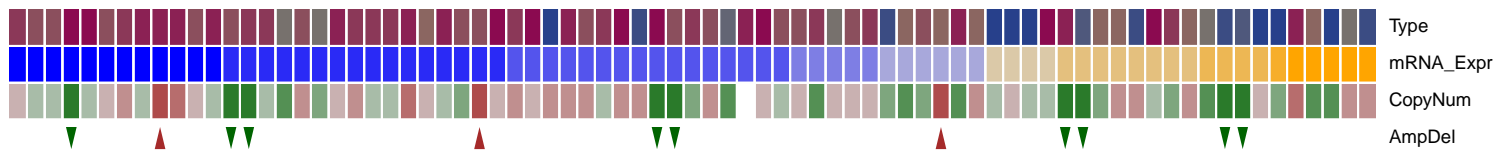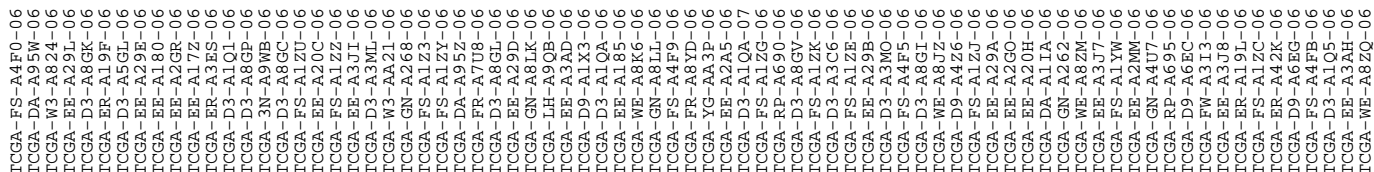

# SOX9

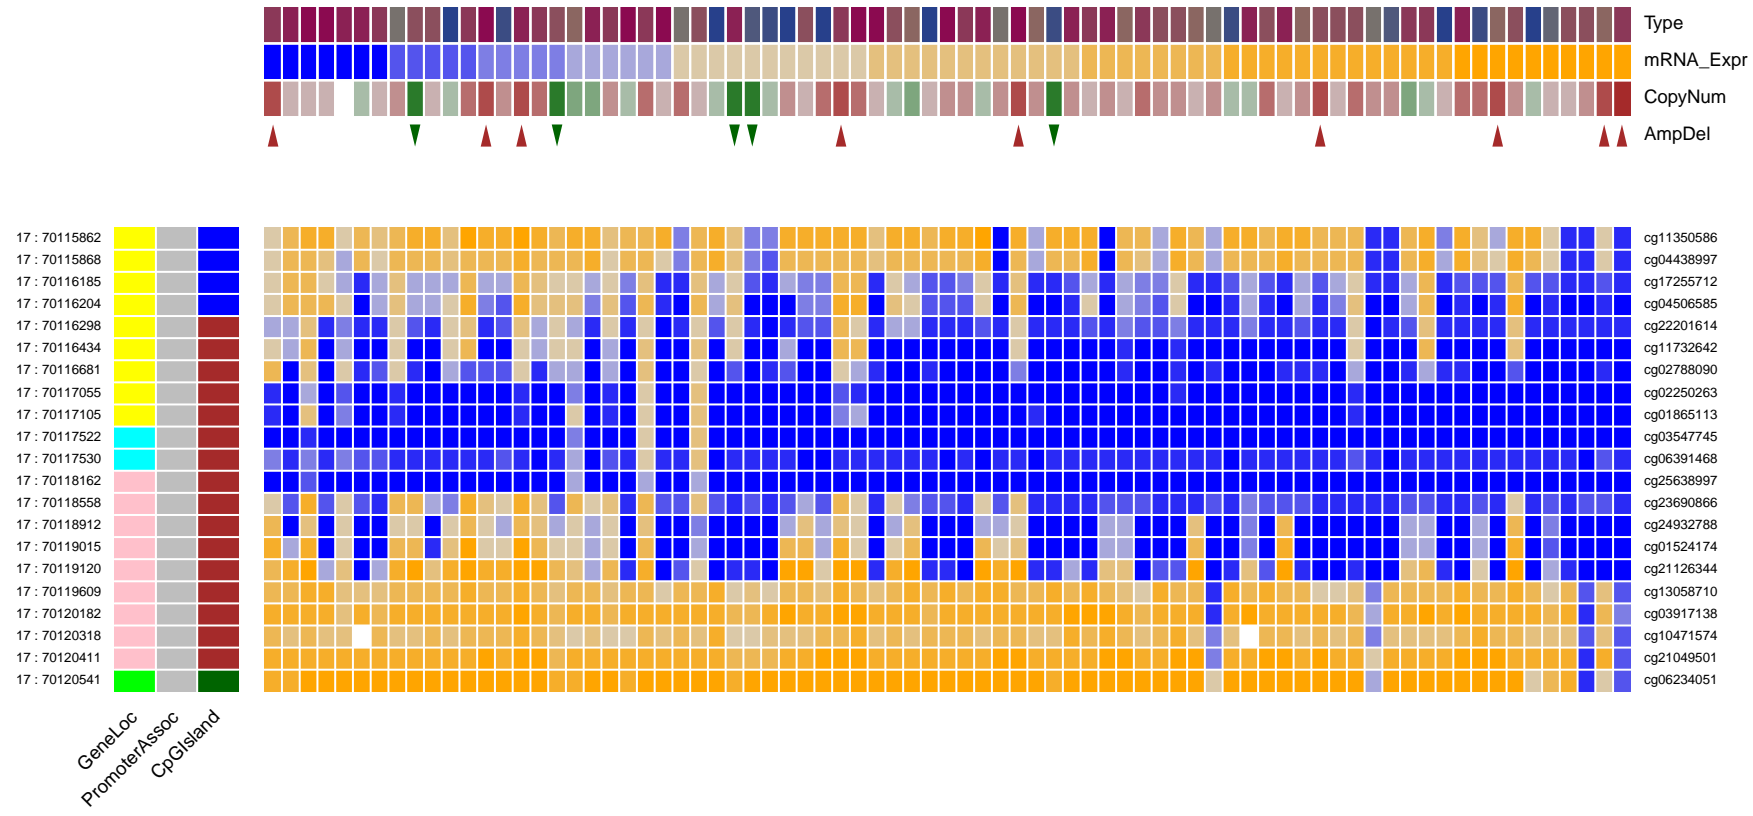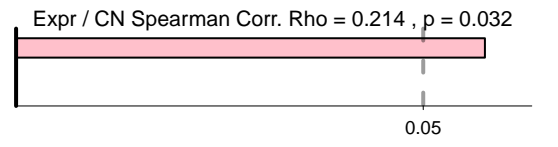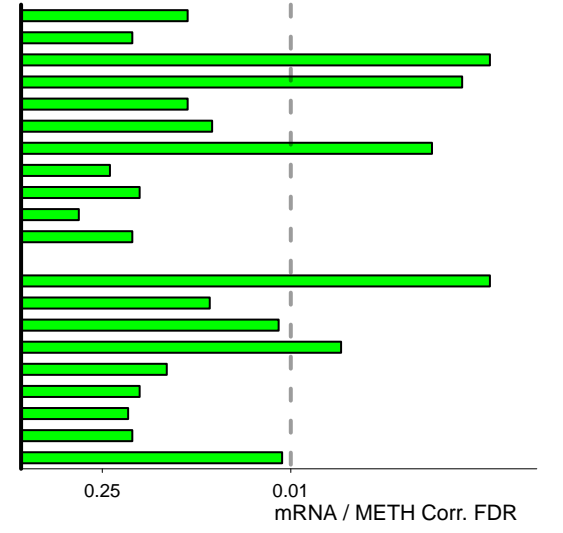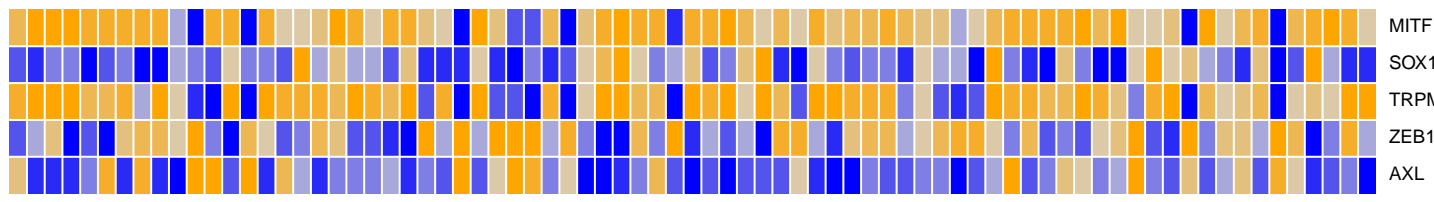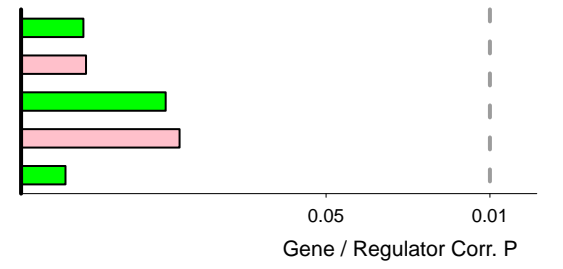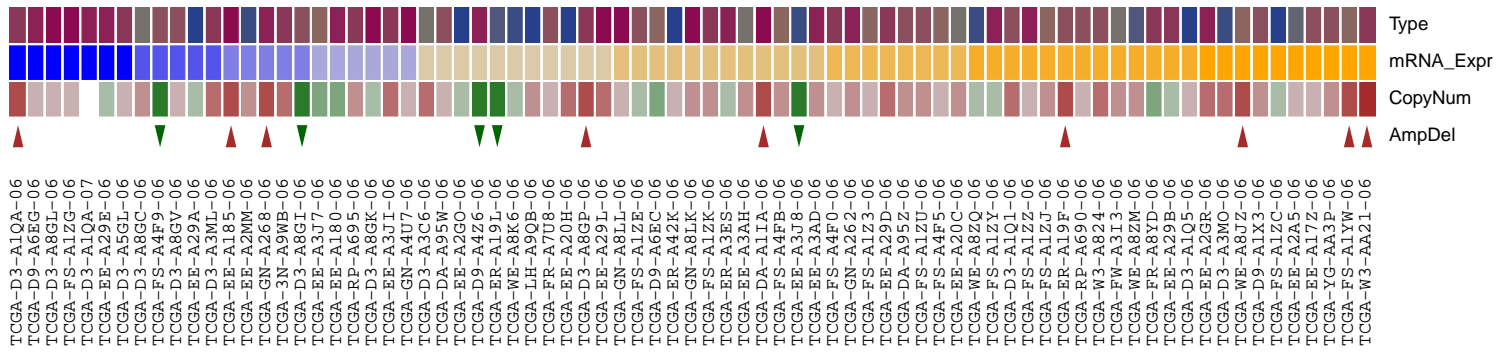

# PDGFC

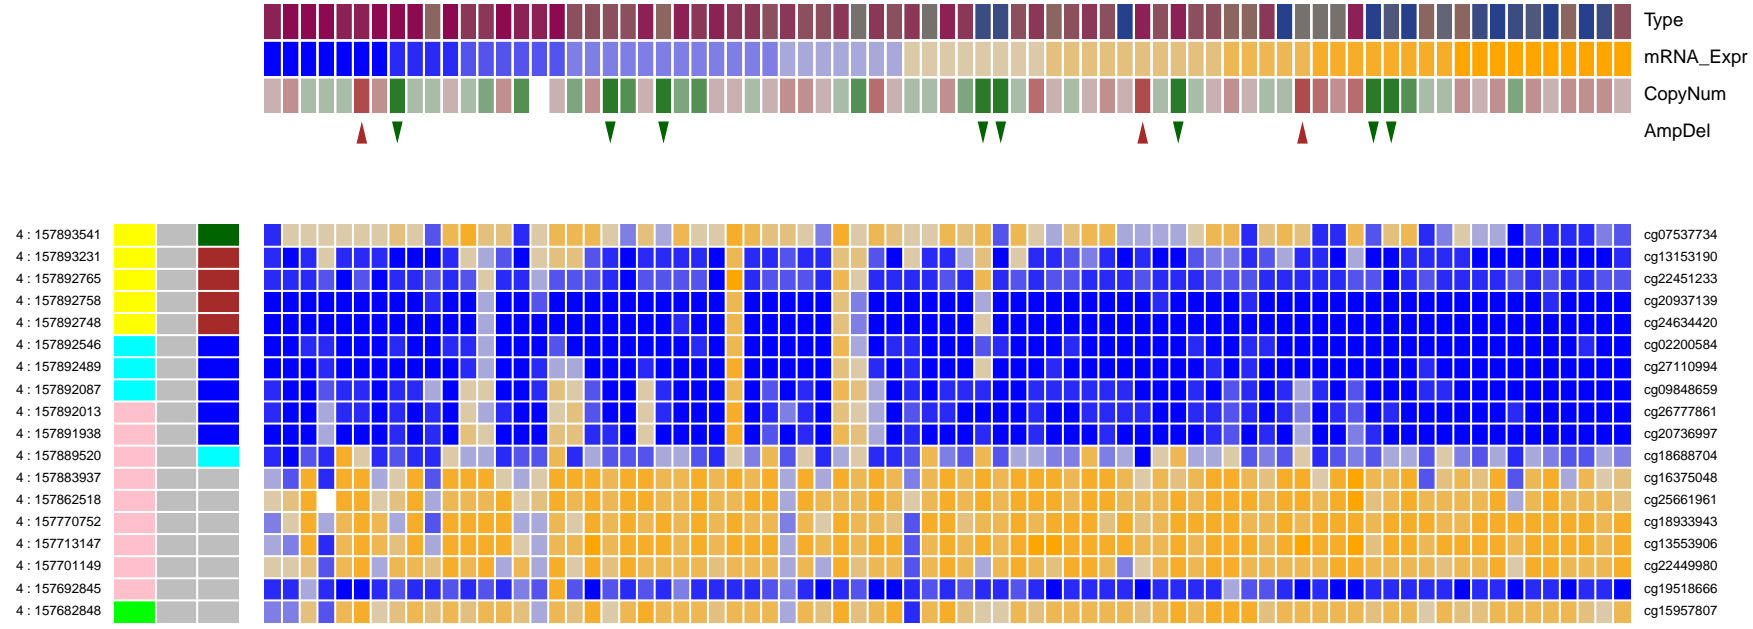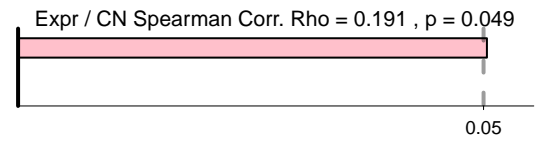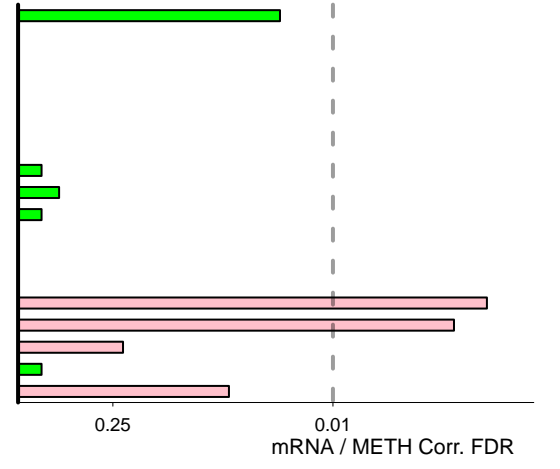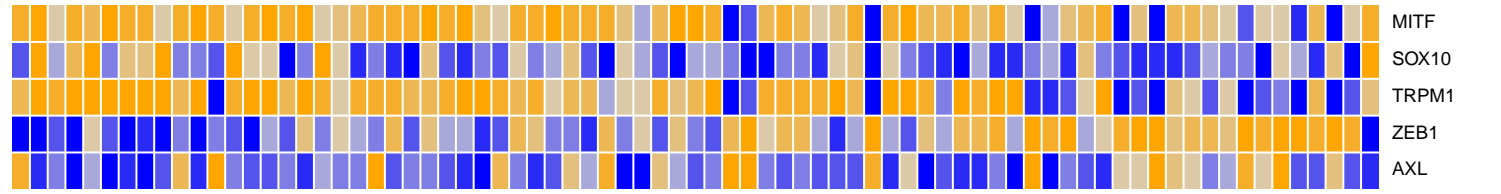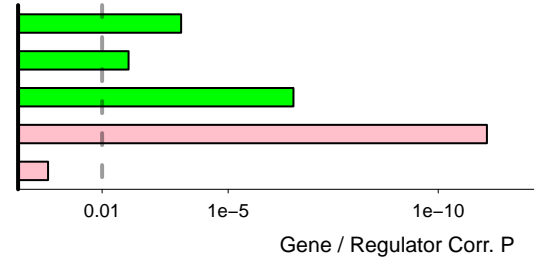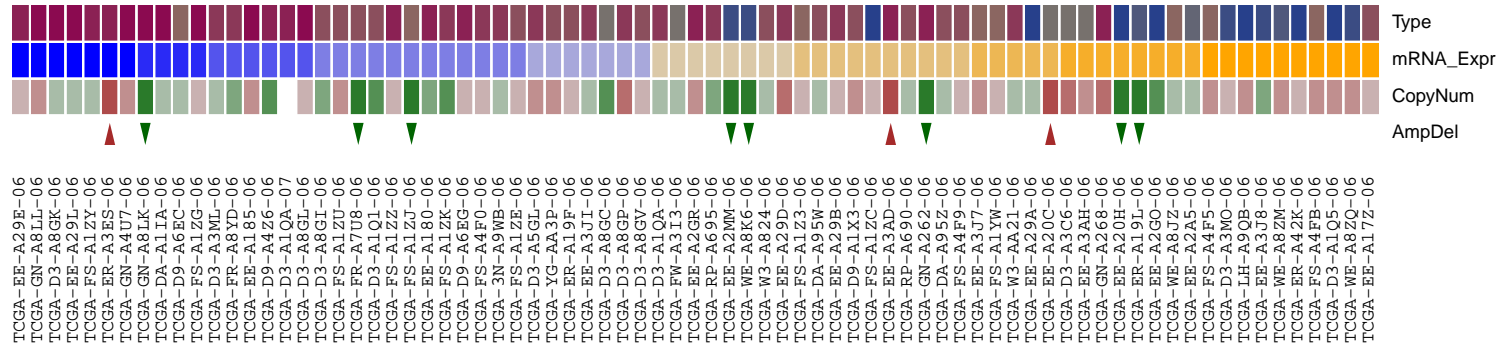

TCGA-EE-A29E-06  
TCGA-GN-A8LL-06  
TCGA-D3-A8GK-06  
TCGA-EE-A29L-06  
TCGA-FS-A1ZY-06  
TCGA-ER-A3ES-06  
TCGA-GN-A4U7-06  
TCGA-GN-A8LK-06  
TCGA-DA-A1IA-06  
TCGA-D9-A6EC-06  
TCGA-FS-A1ZG-06  
TCGA-D3-A3ML-06  
TCGA-FR-A8YD-06  
TCGA-ER-A185-06  
TCGA-D9-A4Z6-06  
TCGA-D3-A1QA-07  
TCGA-D3-A8CI-06  
TCGA-FS-A1ZU-06  
TCGA-FR-A7U8-06  
TCGA-D3-A1Q1-06  
TCGA-FS-A1ZZ-06  
TCGA-FS-A1ZJ-06  
TCGA-EE-A180-06  
TCGA-FS-A1ZK-06  
TCGA-D9-A6EG-06  
TCGA-FS-A4F0-06  
TCGA-3N-A9WB-06  
TCGA-FS-A1ZE-06  
TCGA-D3-A5GL-06  
TCGA-YG-AA3P-06  
TCGA-ER-A19F-06  
TCGA-EE-A3JI-06  
TCGA-D3-A8GC-06  
TCGA-D3-A8GP-06  
TCGA-D3-A8GV-06  
TCGA-FW-A3I3-06  
TCGA-EE-A2GR-06  
TCGA-EE-A695-06  
TCGA-EE-A2MM-06  
TCGA-WE-A8K6-06  
TCGA-W3-A824-06  
TCGA-EE-A29D-06  
TCGA-FS-A1Z3-06  
TCGA-DA-A95W-06  
TCGA-ER-A29B-06  
TCGA-D9-A1X3-06  
TCGA-FS-A1ZC-06  
TCGA-EE-A3AD-06  
TCGA-RE-A690-06  
TCGA-GN-A662-06  
TCGA-DA-A952-06  
TCGA-FS-A4F9-06  
TCGA-EE-A3J7-06  
TCGA-FS-A1YW-06  
TCGA-W3-AA21-06  
TCGA-EE-A29A-06  
TCGA-D3-A3C6-06  
TCGA-EE-A20C-06  
TCGA-D3-A3AH-06  
TCGA-GN-A268-06  
TCGA-EE-A20H-06  
TCGA-EE-A19L-06  
TCGA-EE-A2GO-06  
TCGA-WE-A8JZ-06  
TCGA-EE-A2A5-06  
TCGA-FS-A4F5-06  
TCGA-D3-A3MO-06  
TCGA-LH-A9QB-06  
TCGA-EE-A3J8-06  
TCGA-WE-A8ZM-06  
TCGA-ER-A42K-06  
TCGA-FS-A4FB-06  
TCGA-D3-A1O5-06  
TCGA-WE-A8ZQ-06  
TCGA-EE-A17Z-06

# HECW2

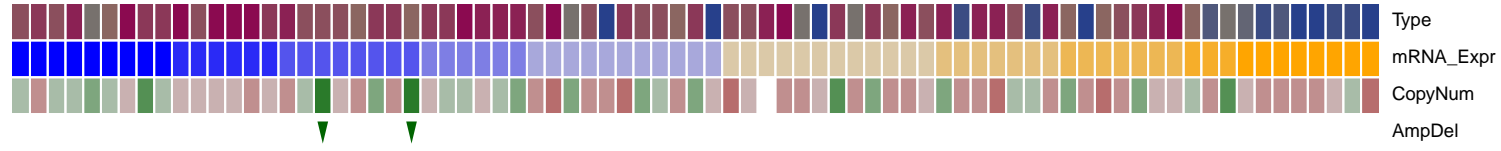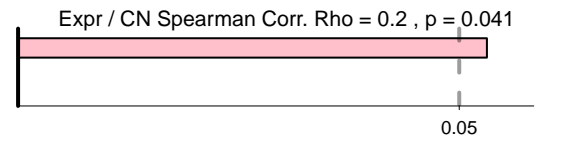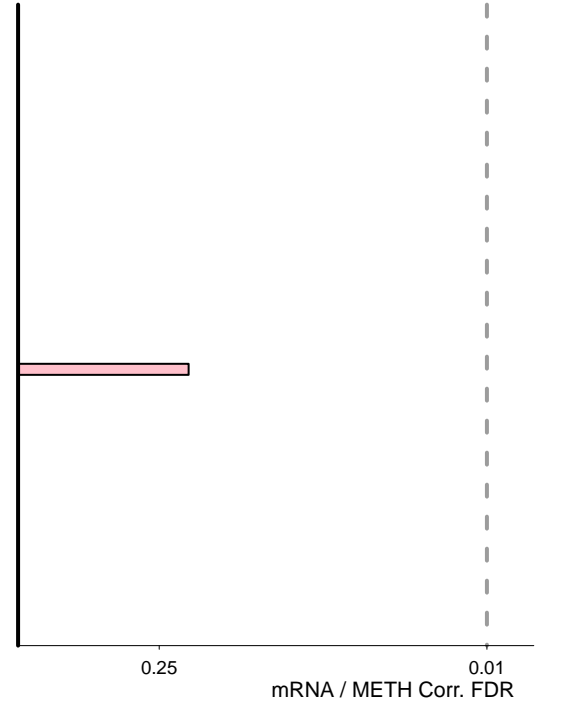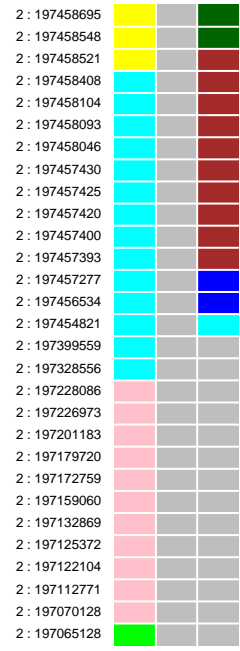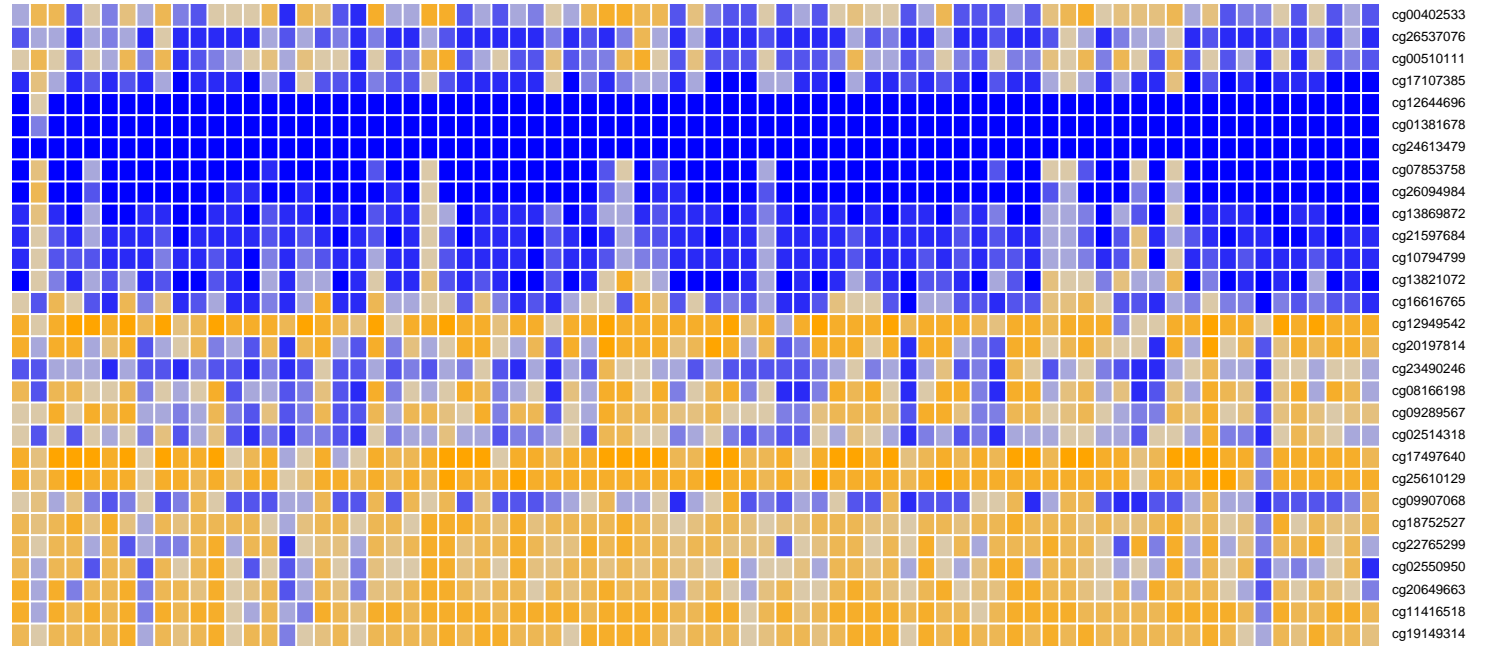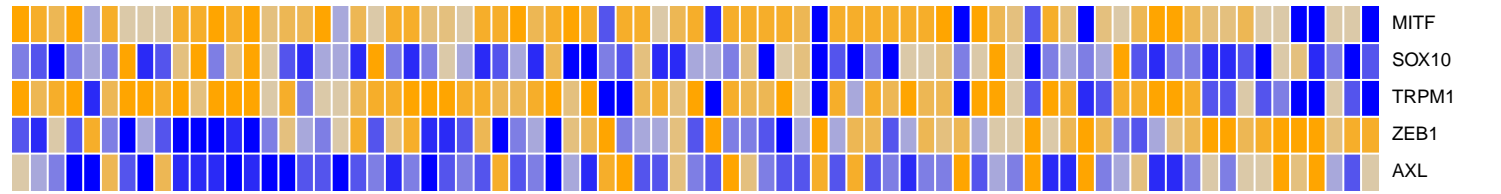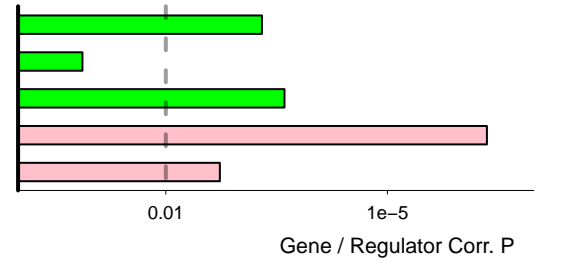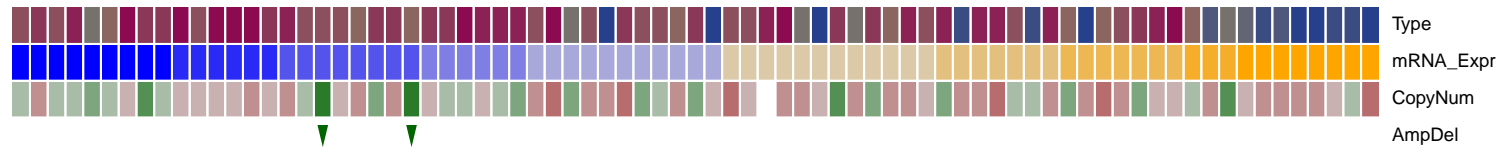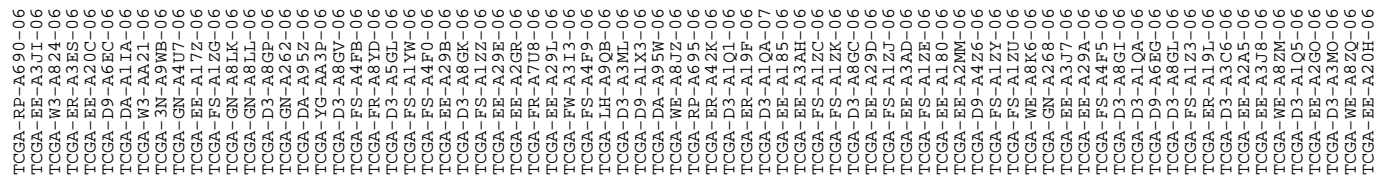

# FZD2

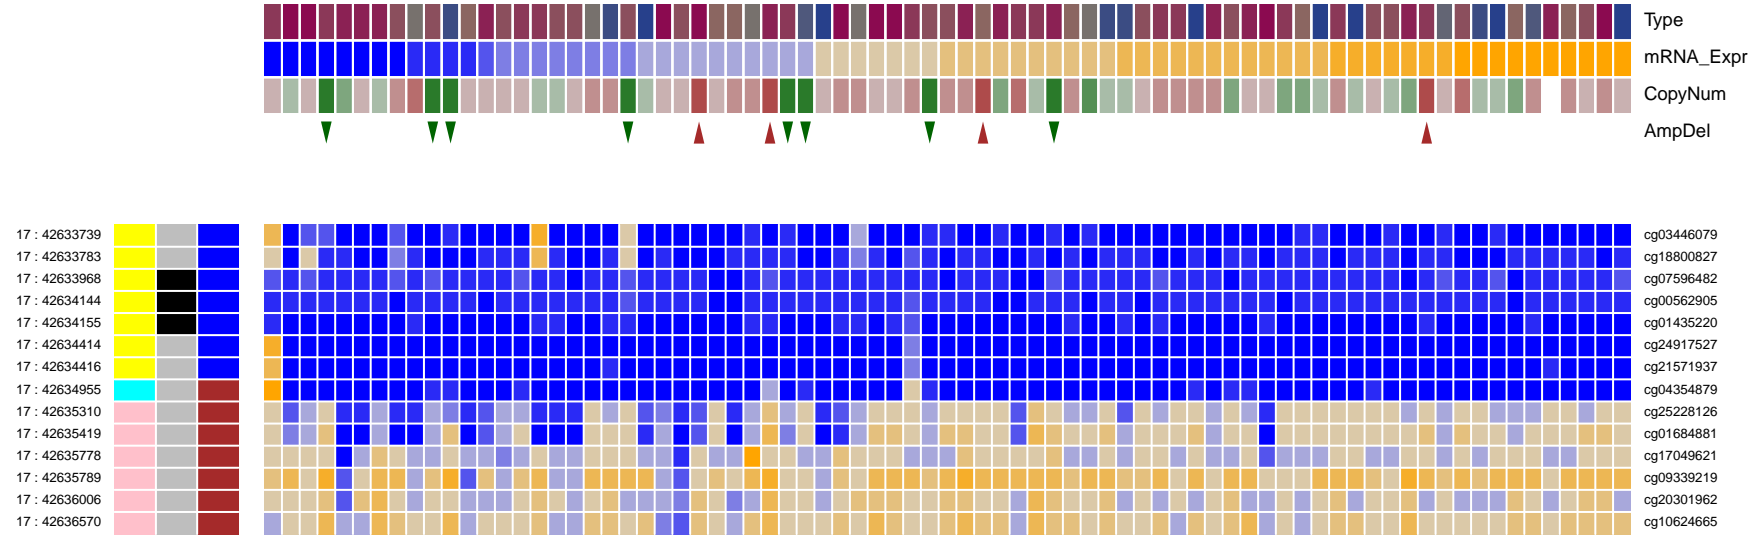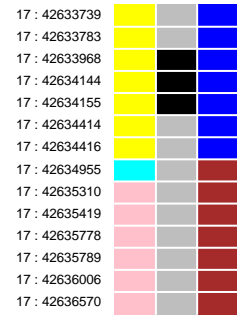

GeneLoc  
PromoterAssoc  
CpGIsland

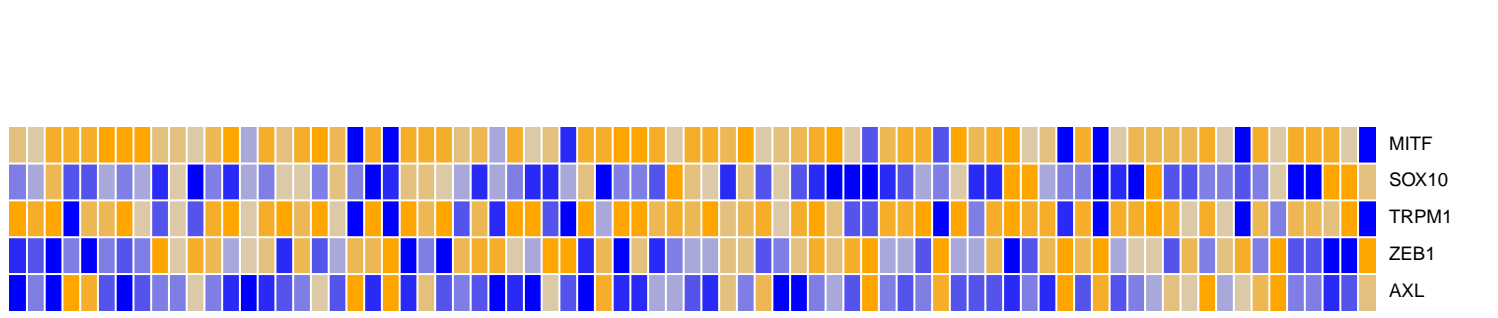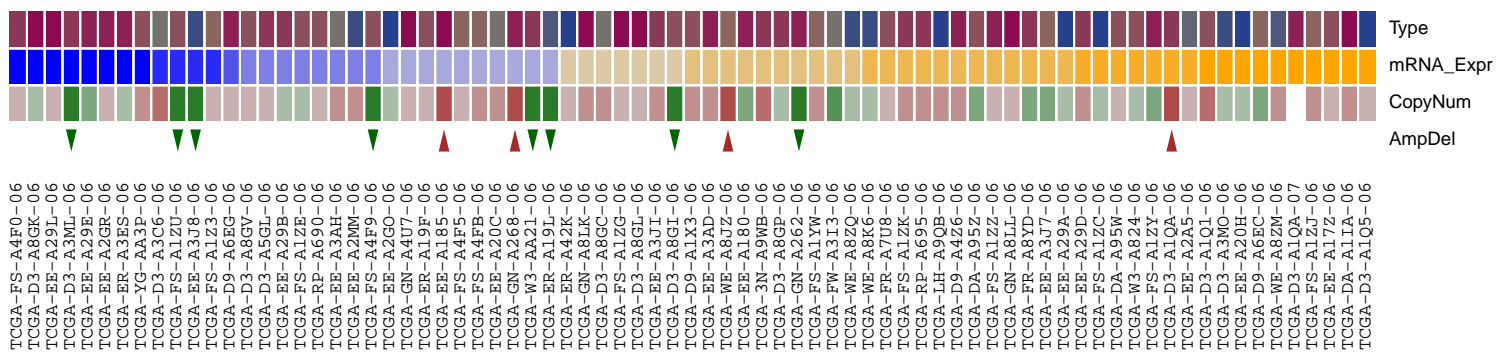

TCGA-FS-AAF0-06  
TCGA-D3-A8GK-06  
TCGA-EE-A29L-06  
TCGA-D3-A3ML-06  
TCGA-EE-A29E-06  
TCGA-EE-A2GR-06  
TCGA-ER-A3ES-06  
TCGA-YG-AA3P-06  
TCGA-D3-A3C6-06  
TCGA-FS-A1ZU-06  
TCGA-EE-A3T8-06  
TCGA-FS-A1Z3-06  
TCGA-D9-A6EG-06  
TCGA-D3-A8GV-06  
TCGA-D3-A5GL-06  
TCGA-EE-A29B-06  
TCGA-FS-A1ZE-06  
TCGA-RE-A39D-06  
TCGA-EE-A3AH-06  
TCGA-EE-A2MM-06  
TCGA-FS-A4F9-06  
TCGA-EE-A2SO-06  
TCGA-GN-A407-06  
TCGA-ER-A19F-06  
TCGA-EE-A185-06  
TCGA-FS-A4F5-06  
TCGA-FS-A4FB-06  
TCGA-EE-A20C-06  
TCGA-GN-A268-06  
TCGA-W3-AA21-06  
TCGA-ER-A19L-06  
TCGA-ER-A42K-06  
TCGA-GN-A8LK-06  
TCGA-D3-A8GC-06  
TCGA-FS-A1ZG-06  
TCGA-D3-A8GL-06  
TCGA-EE-A3JI-06  
TCGA-D3-A8GI-06  
TCGA-D9-A1X3-06  
TCGA-EE-A3AD-06  
TCGA-WE-A8JZ-06  
TCGA-EE-A180-06  
TCGA-3N-A9WB-06  
TCGA-D3-A8GP-06  
TCGA-GN-A262-06  
TCGA-FS-A1YW-06  
TCGA-FW-A3T3-06  
TCGA-WE-A8Z0-06  
TCGA-WE-A8K6-06  
TCGA-ER-A7U8-06  
TCGA-FS-A1ZK-06  
TCGA-RP-A695-06  
TCGA-LH-A9PB-06  
TCGA-D9-A8Z6-06  
TCGA-DA-A95Z-06  
TCGA-FS-A1ZZ-06  
TCGA-GN-A8LL-06  
TCGA-FR-A8YD-06  
TCGA-EE-A3J7-06  
TCGA-EE-A29A-06  
TCGA-FS-A1ZC-06  
TCGA-DA-A95W-06  
TCGA-W3-A824-06  
TCGA-FS-A1ZY-06  
TCGA-D3-A1QA-06  
TCGA-EE-A2A5-06  
TCGA-D3-A1Q1-06  
TCGA-D3-A3MO-06  
TCGA-EE-A20H-06  
TCGA-D9-A6EC-06  
TCGA-WE-A8ZM-06  
TCGA-D3-A1QA-07  
TCGA-FS-A1ZJ-06  
TCGA-EE-A17Z-06  
TCGA-DA-A1IA-06  
TCGA-D3-AIQ5-06

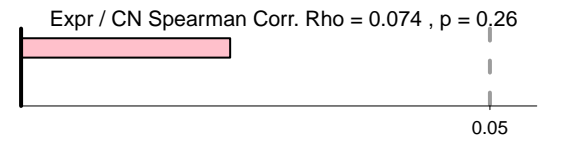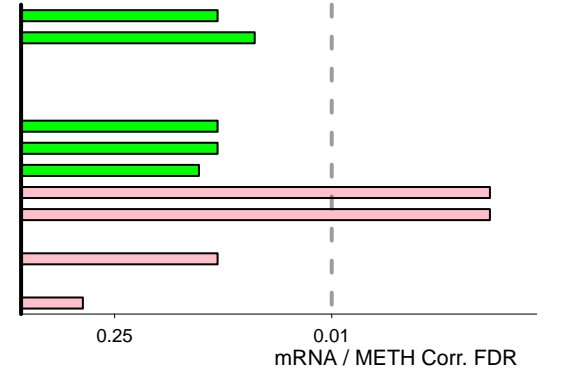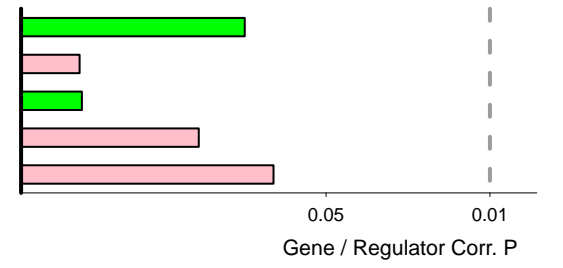

# PAPPA

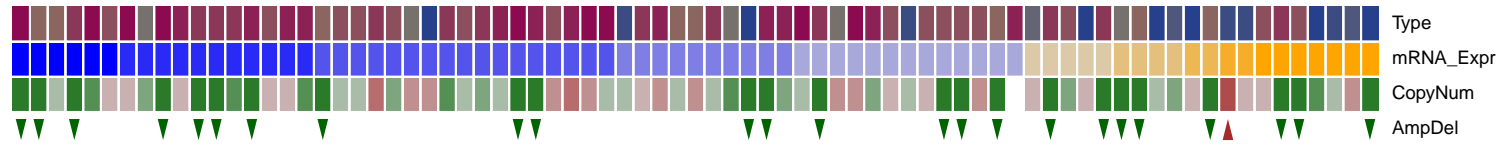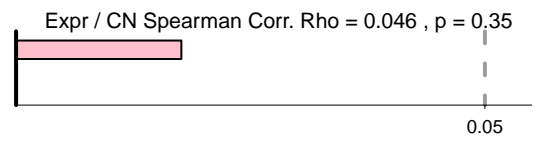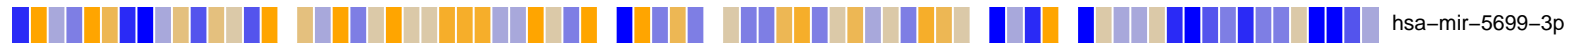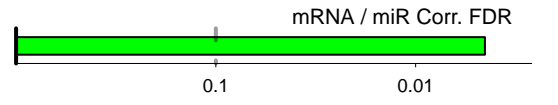

9:118915832  
9:118915867  
9:118915907  
9:118916132  
9:118916493  
9:118916976  
9:118917109  
9:118917650  
9:118918160  
9:118950322  
9:118996078  
9:119000864  
9:119041784  
9:119048807  
9:119159075

GeneLoc  
PromoterAssoc  
CpGIsland

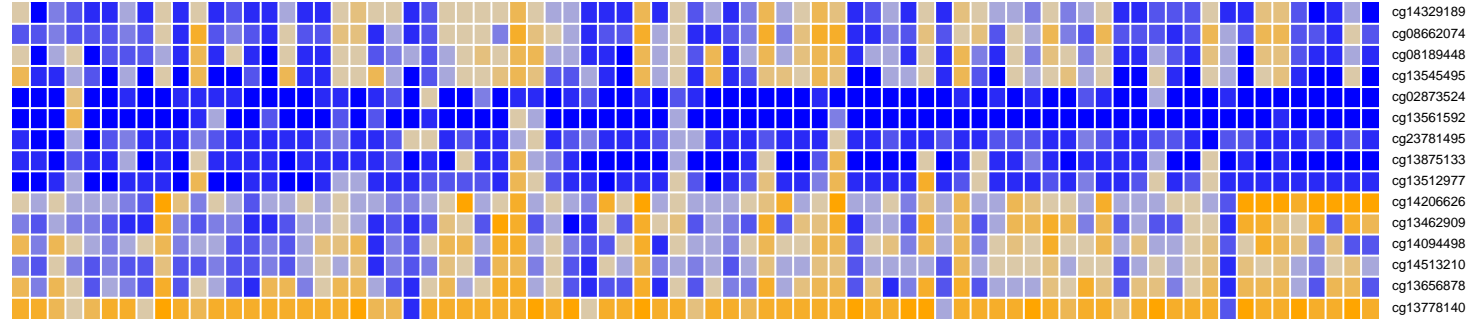

cg14329189  
cg08662074  
cg08189448  
cg13545495  
cg02873524  
cg13561592  
cg23781495  
cg13875133  
cg13512977  
cg14206626  
cg13462909  
cg14094498  
cg14513210  
cg13656878  
cg13778140

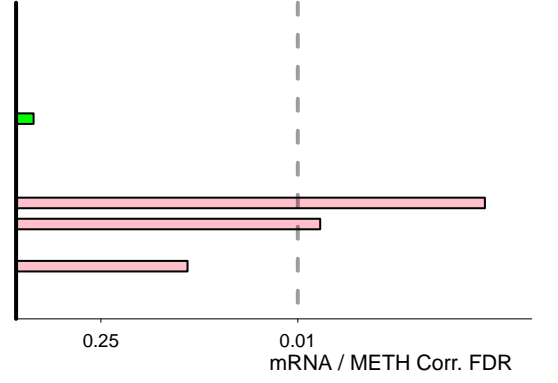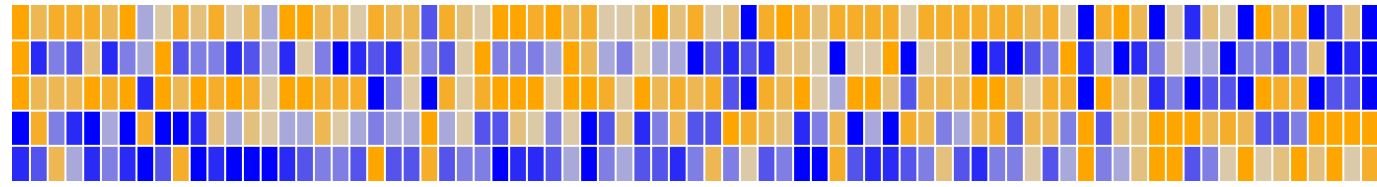

MITF  
SOX10  
TRPM1  
ZEB1  
AXL

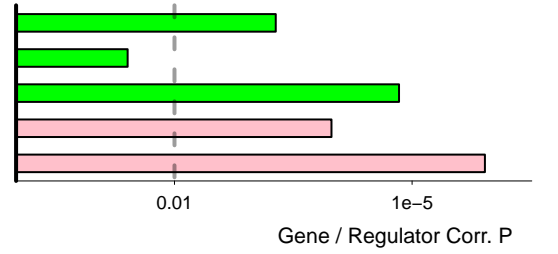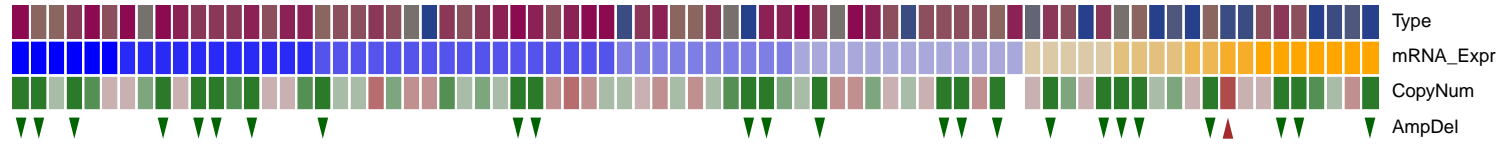

TCGA-GN-A8LL-06  
TCGA-FS-A4FB-06  
TCGA-D9-A6EC-06  
TCGA-EE-A3JI-06  
TCGA-GN-A4U7-06  
TCGA-FR-A7U8-06  
TCGA-FS-A1ZG-06  
TCGA-EE-A20C-06  
TCGA-DA-A1IA-06  
TCGA-EE-A29F-06  
TCGA-FS-A4F0-06  
TCGA-D3-A5GI-06  
TCGA-W3-AA21-06  
TCGA-GN-A262-06  
TCGA-D3-A8GV-06  
TCGA-D9-A6EG-06  
TCGA-ES-A1Z9-06  
TCGA-W3-A824-06  
TCGA-DA-A95W-06  
TCGA-D3-A3ML-06  
TCGA-DA-A95Z-06  
TCGA-EE-A3AH-06  
TCGA-LH-A9QB-06  
TCGA-FS-A1ZK-06  
TCGA-FR-A8YD-06  
TCGA-ER-A3ES-06  
TCGA-D3-A8GL-06  
TCGA-GN-A268-06  
TCGA-YG-AA3P-06  
TCGA-FS-A1ZY-06  
TCGA-EE-A291-06  
TCGA-D3-A8GK-06  
TCGA-D3-A3MO-06  
TCGA-EE-A29B-06  
TCGA-EE-A2GR-06  
TCGA-EE-A3J7-06  
TCGA-FS-A1ZJ-06  
TCGA-3N-A9WB-06  
TCGA-D3-A3C6-06  
TCGA-EE-A20H-06  
TCGA-FS-A1ZZ-06  
TCGA-EE-A180-06  
TCGA-GN-A8LK-06  
TCGA-D3-A8GC-06  
TCGA-EE-A185-06  
TCGA-EE-A3AD-06  
TCGA-EE-A17Z-06  
TCGA-WE-A8ZQ-06  
TCGA-FS-A1ZE-06  
TCGA-ER-A19F-06  
TCGA-D9-A1X3-06  
TCGA-FS-A4F9-06  
TCGA-FS-A1YW-06  
TCGA-D3-A1QA-07  
TCGA-EE-A2A5-06  
TCGA-EE-A29D-06  
TCGA-D3-A8GI-06  
TCGA-EE-A2GO-06  
TCGA-RP-A695-06  
TCGA-FW-A3I3-06  
TCGA-WE-A8JZ-06  
TCGA-EE-A29A-06  
TCGA-WE-A8ZN-06  
TCGA-ER-A42K-06  
TCGA-FS-A4F5-06  
TCGA-EE-A3J8-06  
TCGA-EE-A2MN-06  
TCGA-RP-A690-06  
TCGA-D3-A1QA-06  
TCGA-D3-A1O1-06  
TCGA-D3-A1O5-06  
TCGA-WE-A8K6-06  
TCGA-ER-A191-06  
TCGA-FS-A1ZC-06

# WNT5A

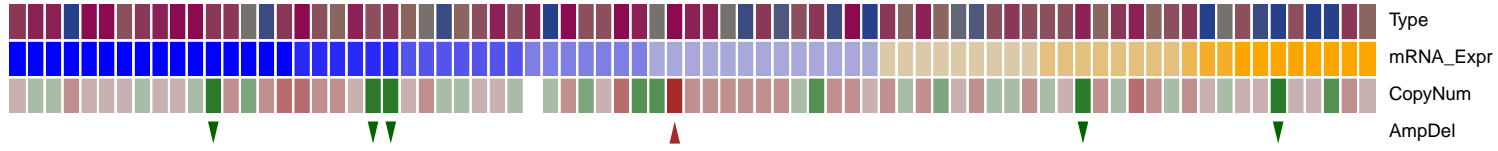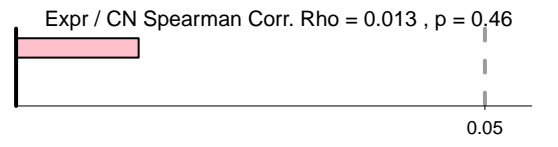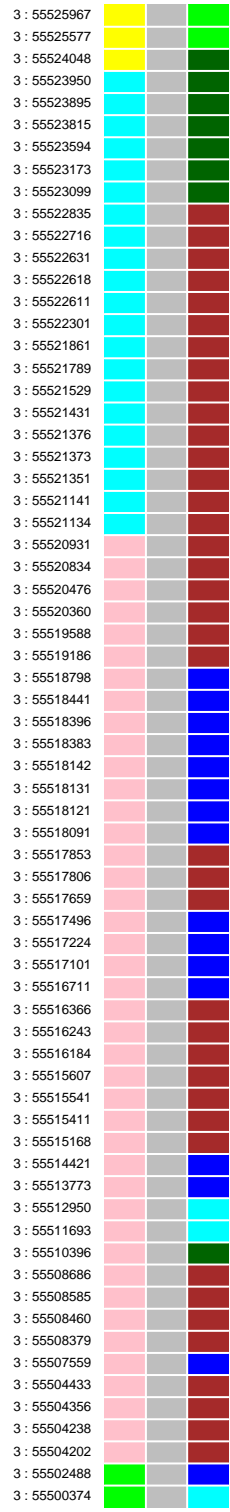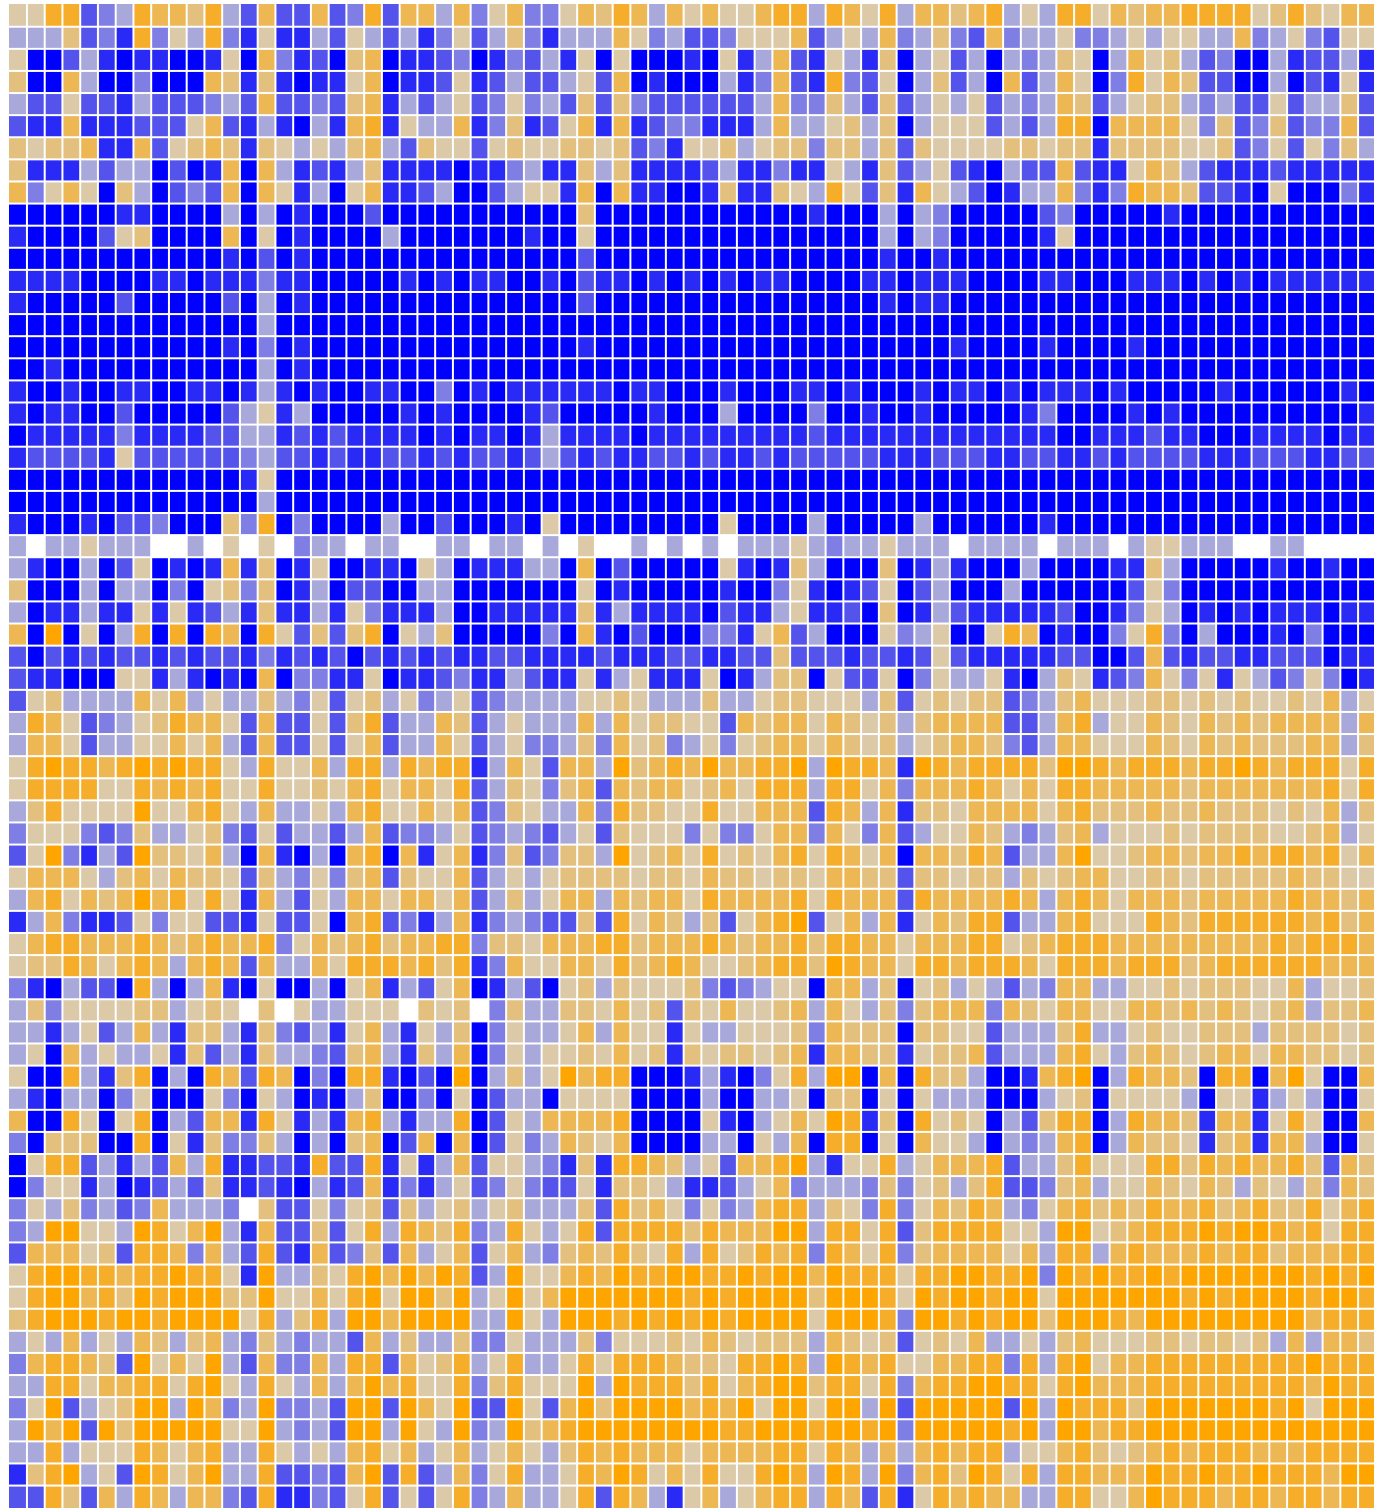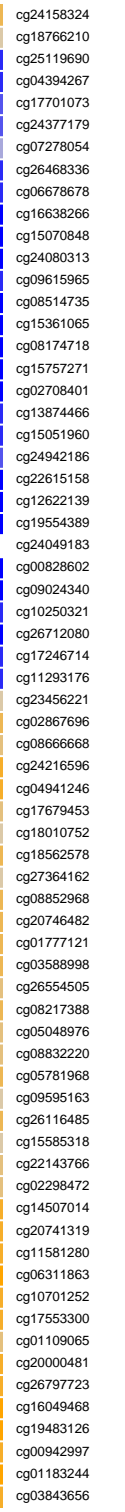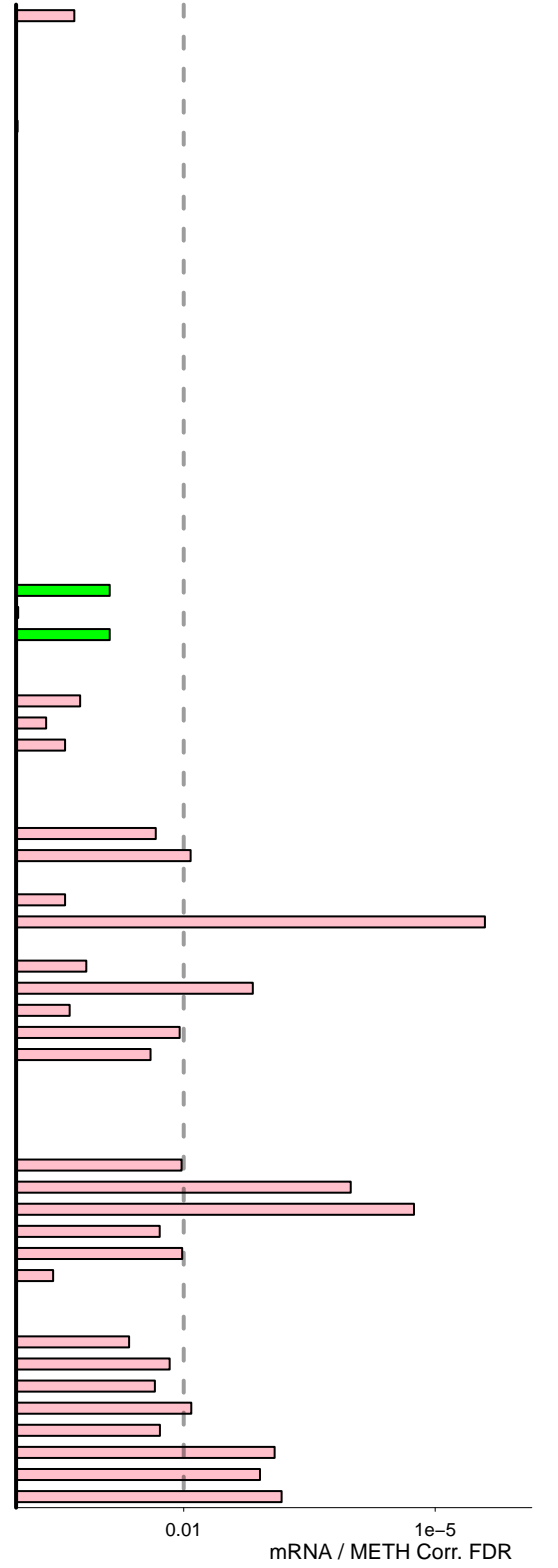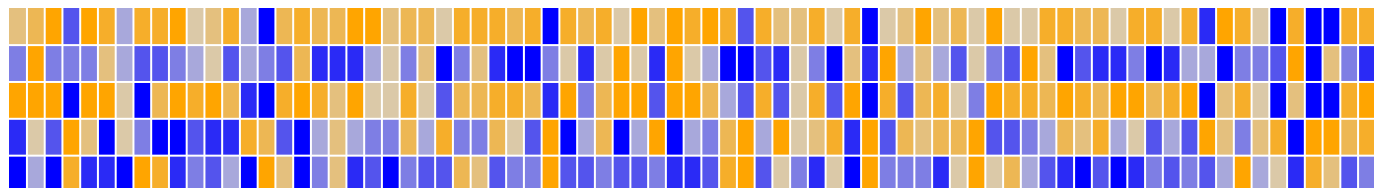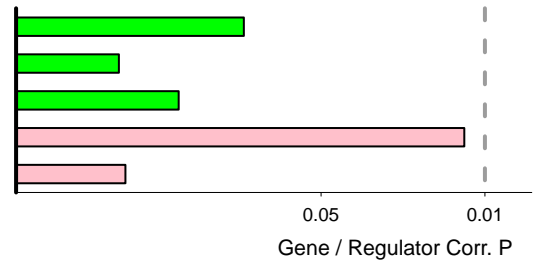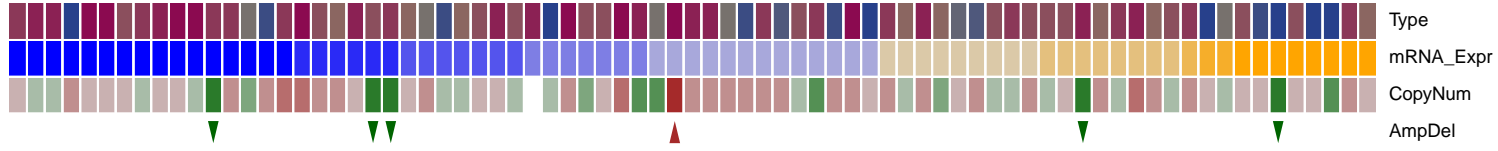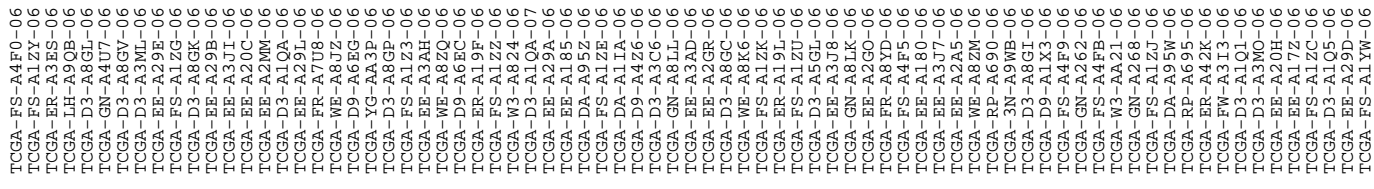

# TGM2

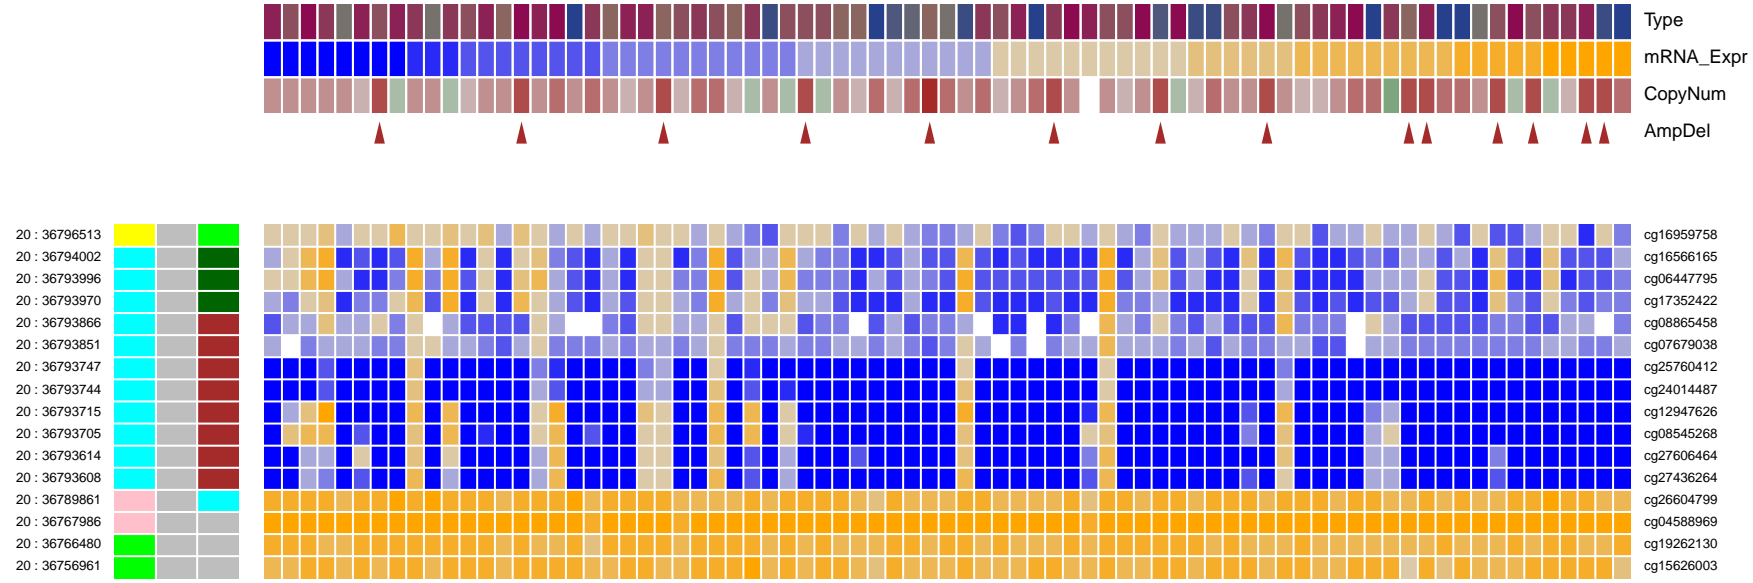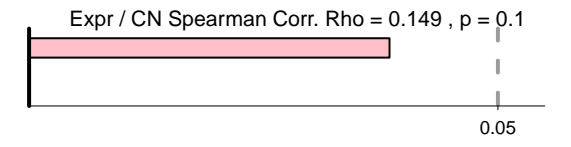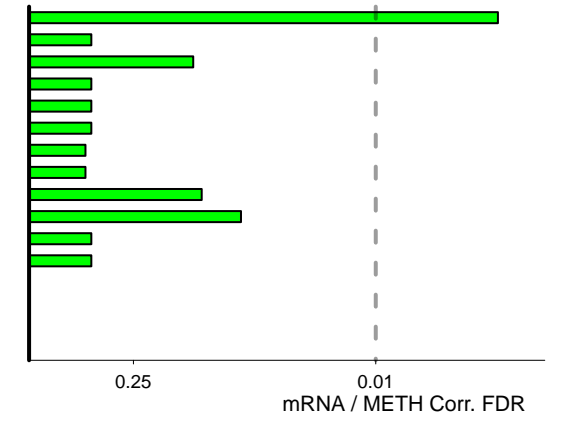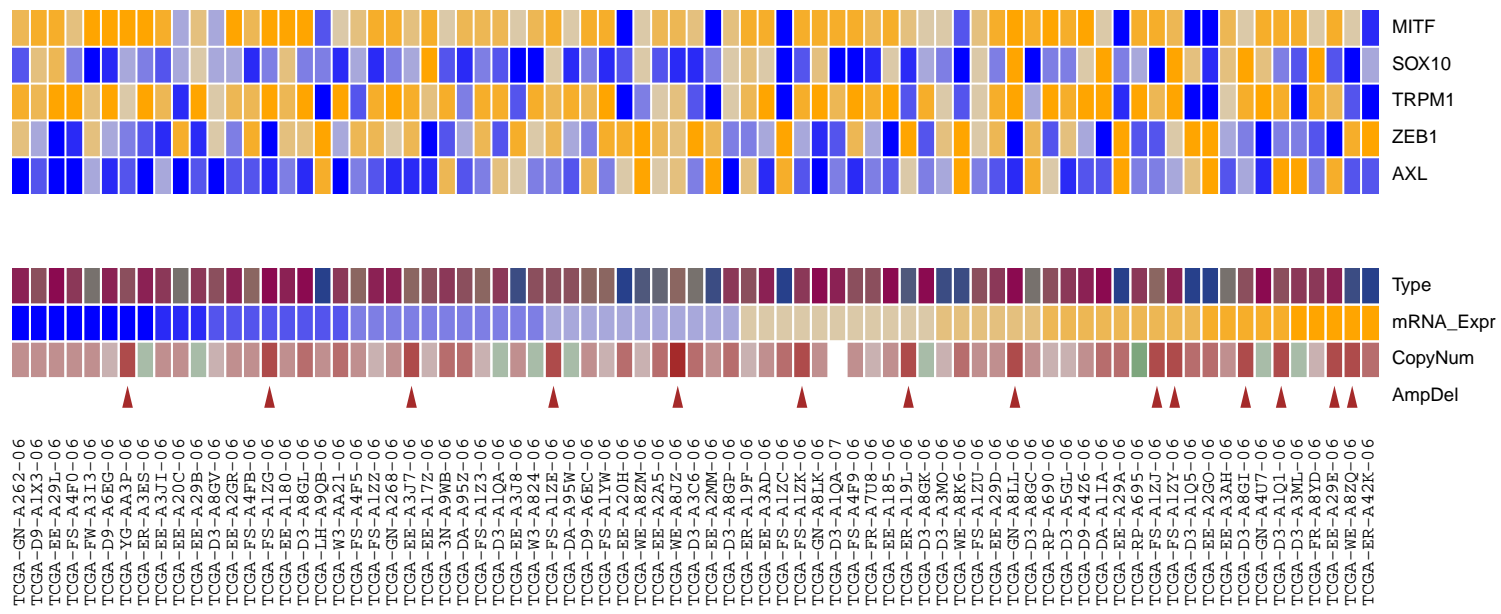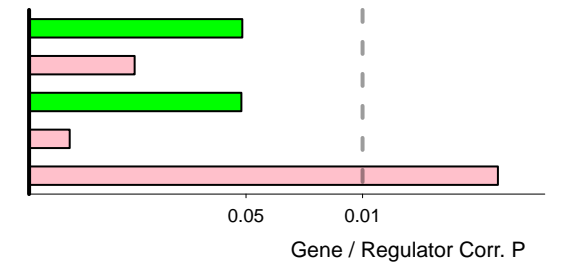



# SQRDL

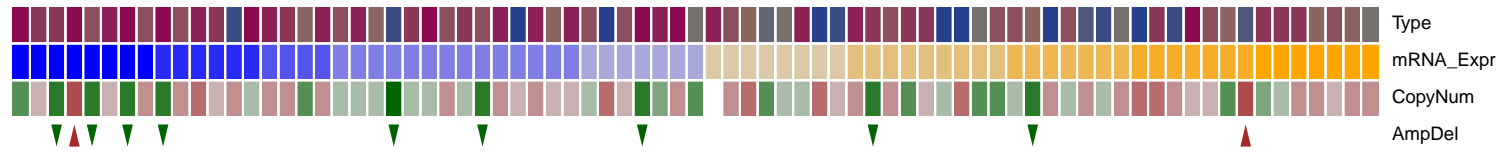

15 : 45926780  
 15 : 45926878  
 15 : 45927050  
 15 : 45927086  
 15 : 45927123  
 15 : 45927126  
 15 : 45927218  
 15 : 45927255  
 15 : 45927554  
 15 : 45927921  
 15 : 45929860  
 15 : 45932303  
 15 : 45952725  
 15 : 45962135  
 15 : 45983303

GeneLoc  
 PromoterAssoc  
 CpGIsland

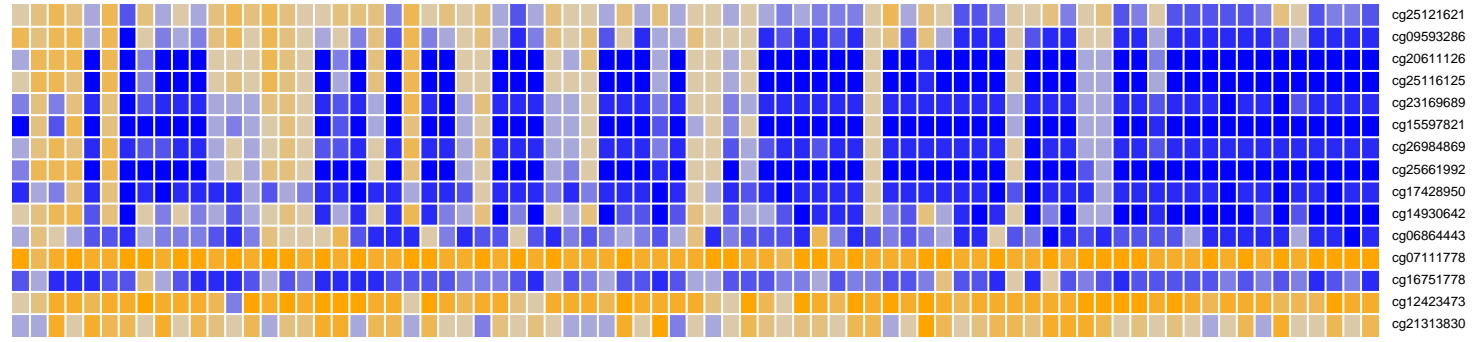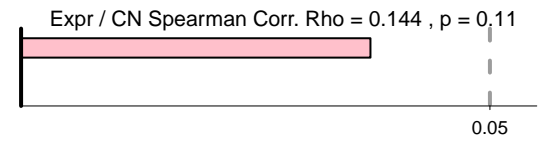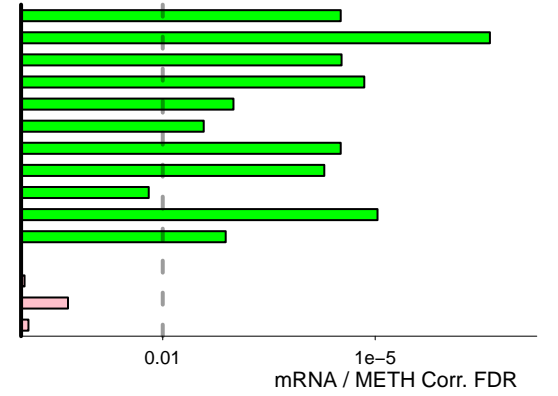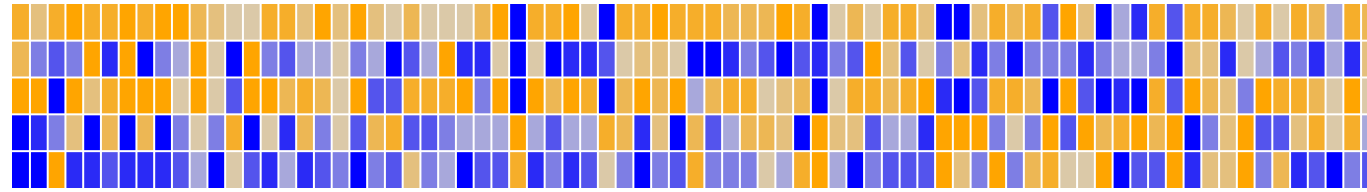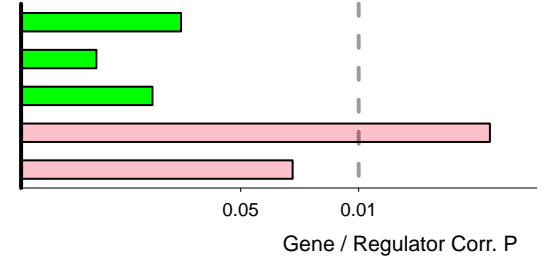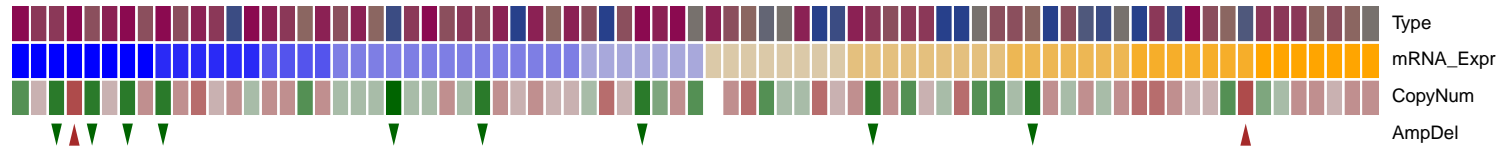

TCGA-EE-A29L-06  
 TCGA-FS-A4F0-06  
 TCGA-D3-A3ML-06  
 TCGA-D3-A8GL-06  
 TCGA-EE-A17Z-06  
 TCGA-FS-A1ZZ-06  
 TCGA-GN-A8LL-06  
 TCGA-FS-A4F9-06  
 TCGA-FS-A1ZG-06  
 TCGA-YG-AA3P-06  
 TCGA-FS-A1ZY-06  
 TCGA-D3-A8GP-06  
 TCGA-ER-A3T8-06  
 TCGA-DA-A1IA-06  
 TCGA-GN-A268-06  
 TCGA-EE-A3TL-06  
 TCGA-EE-A3T7-06  
 TCGA-EE-A2GR-06  
 TCGA-FS-A1ZU-06  
 TCGA-ER-A3ES-06  
 TCGA-FS-A4F5-06  
 TCGA-WE-A6ZQ-06  
 TCGA-D3-A1QA-06  
 TCGA-D3-A8GK-06  
 TCGA-D3-A8GI-06  
 TCGA-W3-AAZ1-06  
 TCGA-DA-A95Z-06  
 TCGA-D9-A4Z6-06  
 TCGA-FS-A1ZC-06  
 TCGA-EE-A3AD-06  
 TCGA-FS-A1ZJ-06  
 TCGA-D9-A6EG-06  
 TCGA-DA-A95W-06  
 TCGA-EE-A20H-06  
 TCGA-FS-A1ZE-06  
 TCGA-GN-A8LK-06  
 TCGA-EE-A180-06  
 TCGA-EE-A185-06  
 TCGA-D3-A8GC-06  
 TCGA-D3-A1QA-07  
 TCGA-PR-A7U8-06  
 TCGA-FS-A1Z3-06  
 TCGA-EE-A2A5-06  
 TCGA-FW-A3I3-06  
 TCGA-EE-A29E-06  
 TCGA-EE-A2GO-06  
 TCGA-D3-A3MO-06  
 TCGA-GN-A262-06  
 TCGA-PR-A8VD-06  
 TCGA-D6-A1X3-06  
 TCGA-FS-A1ZK-06  
 TCGA-EE-A29B-06  
 TCGA-EE-A29A-06  
 TCGA-D3-A1Q5-06  
 TCGA-D3-A3C6-06  
 TCGA-D3-A1Q1-06  
 TCGA-W3-A624-06  
 TCGA-D9-A6EC-06  
 TCGA-LH-A9QB-06  
 TCGA-RP-A690-06  
 TCGA-ER-A19L-06  
 TCGA-EE-A2MM-06  
 TCGA-EE-A20C-06  
 TCGA-EE-A42K-06  
 TCGA-EE-A29D-06  
 TCGA-WE-A8K6-06  
 TCGA-GN-A4U7-06  
 TCGA-ER-A19F-06  
 TCGA-WE-A8JZ-06  
 TCGA-WE-A8ZM-06  
 TCGA-RP-A695-06  
 TCGA-3N-A9WB-06  
 TCGA-D3-A5GL-06  
 TCGA-FS-A4FB-06  
 TCGA-D3-A6GY-06  
 TCGA-FS-A1YW-06  
 TCGA-EE-A3AH-06

# IRF1

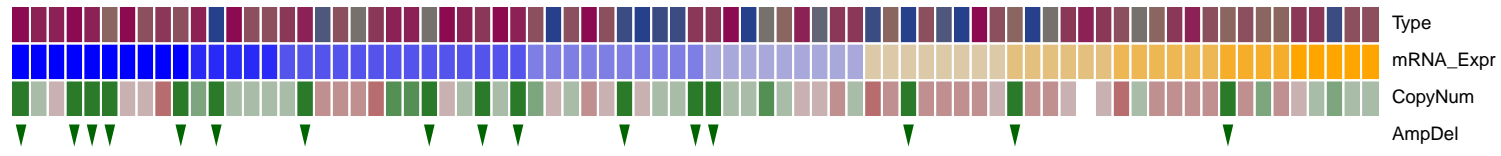

5 : 131827918  
 5 : 131827807  
 5 : 131826934  
 5 : 131826865  
 5 : 131826611  
 5 : 131826485  
 5 : 131826479  
 5 : 131826458  
 5 : 131825865  
 5 : 131825644  
 5 : 131823451  
 5 : 131817482

GeneLoc  
 PromoterAssoc  
 CpGIsland

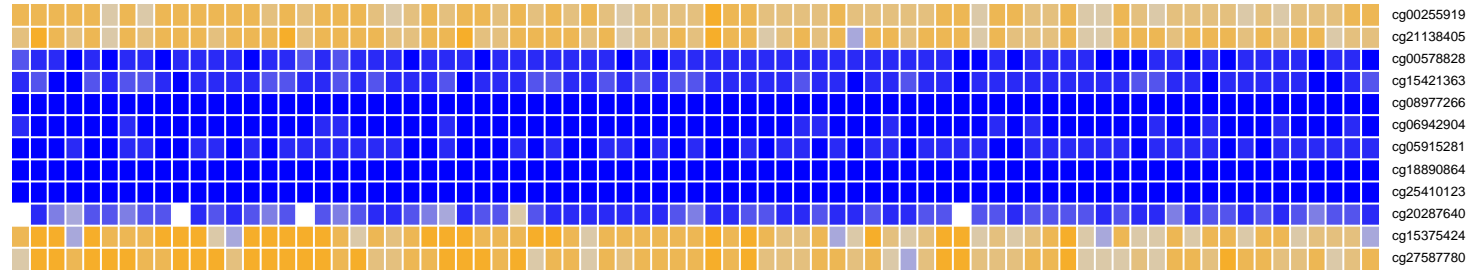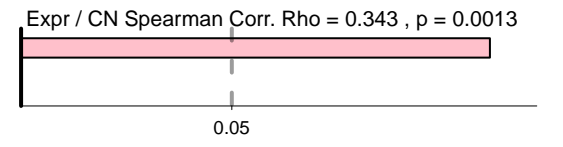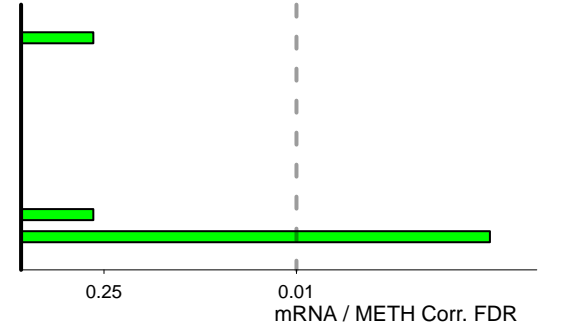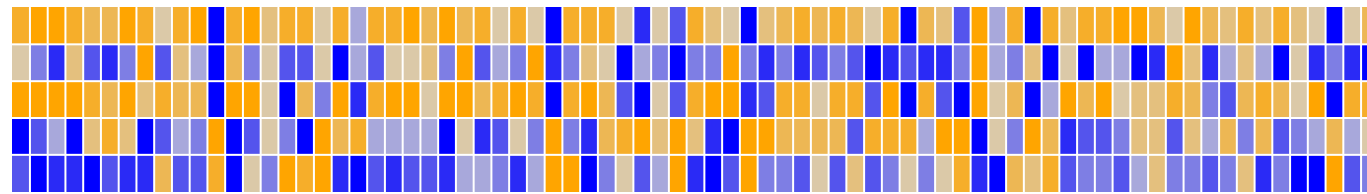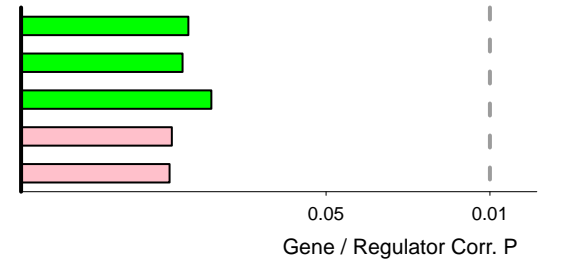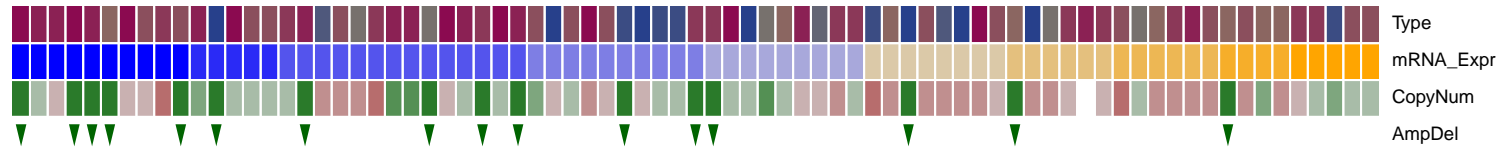

TCGA-EE-A185-06  
 TCGA-ER-A3ES-06  
 TCGA-D9-A6EG-06  
 TCGA-GN-A4U7-06  
 TCGA-GN-A262-06  
 TCGA-FS-A4FB-06  
 TCGA-EE-A172-06  
 TCGA-3N-A9WB-06  
 TCGA-D9-A1X3-06  
 TCGA-EE-A2GR-06  
 TCGA-FS-A1ZC-06  
 TCGA-EE-A291-06  
 TCGA-RP-A690-06  
 TCGA-FS-A1ZU-06  
 TCGA-D3-A3ML-06  
 TCGA-EE-A29E-06  
 TCGA-WE-A8ZM-06  
 TCGA-FS-A4F9-06  
 TCGA-EE-A20C-06  
 TCGA-FS-A1ZK-06  
 TCGA-EE-A3AD-06  
 TCGA-D9-A4Z6-06  
 TCGA-EE-A3AH-06  
 TCGA-FS-A1ZG-06  
 TCGA-EE-A1ZY-06  
 TCGA-EE-A3JI-06  
 TCGA-D3-A8GK-06  
 TCGA-D3-A8GI-06  
 TCGA-EE-A2GO-06  
 TCGA-D3-A1Q1-06  
 TCGA-GN-A8LK-06  
 TCGA-FS-A1ZE-06  
 TCGA-EE-A3J8-06  
 TCGA-ER-A42K-06  
 TCGA-D3-A3MO-06  
 TCGA-WE-A8K6-06  
 TCGA-D3-A5GI-06  
 TCGA-FS-A4F0-06  
 TCGA-DA-A1IA-06  
 TCGA-EE-A29A-06  
 TCGA-D3-A3C6-06  
 TCGA-FS-A1Z3-06  
 TCGA-EE-A2A5-06  
 TCGA-EE-A29D-06  
 TCGA-D3-A1QA-06  
 TCGA-WE-A8ZQ-06  
 TCGA-FS-A1YX-06  
 TCGA-EE-A20H-06  
 TCGA-ER-A7U8-06  
 TCGA-ER-A19L-06  
 TCGA-LH-A9QB-06  
 TCGA-GN-A8LL-06  
 TCGA-D3-A8GV-06  
 TCGA-D3-A1Q5-06  
 TCGA-D3-A8GC-06  
 TCGA-EE-A29B-06  
 TCGA-D3-A1QA-07  
 TCGA-RP-A695-06  
 TCGA-YG-AA3P-06  
 TCGA-FW-A3I3-06  
 TCGA-WE-A8JZ-06  
 TCGA-FR-A8YD-06  
 TCGA-EE-A180-06  
 TCGA-DA-A95Z-06  
 TCGA-FS-A4F5-06  
 TCGA-ER-A19F-06  
 TCGA-EE-A3J7-06  
 TCGA-FS-A1ZJ-06  
 TCGA-D3-A8GP-06  
 TCGA-W3-AA21-06  
 TCGA-EE-A2MN-06  
 TCGA-DA-A95W-06  
 TCGA-W3-A824-06

# SMURF2

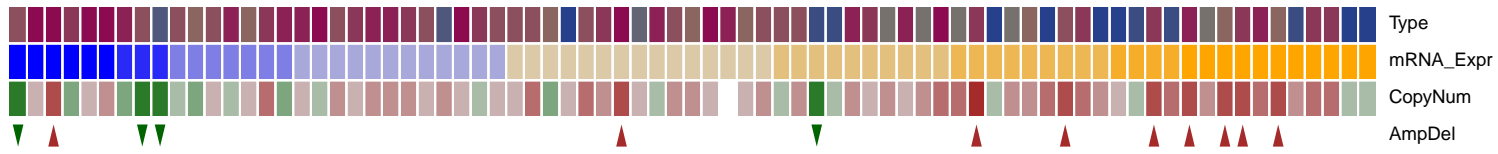

17 : 62658919  
 17 : 62658854  
 17 : 62658827  
 17 : 62658750  
 17 : 62658397  
 17 : 62658371  
 17 : 62657955  
 17 : 62657497  
 17 : 62656813  
 17 : 62608856  
 17 : 62600789  
 17 : 62577106  
 17 : 62550868  
 17 : 62540820

GeneLoc  
 PromoterAssoc  
 CpGIsland

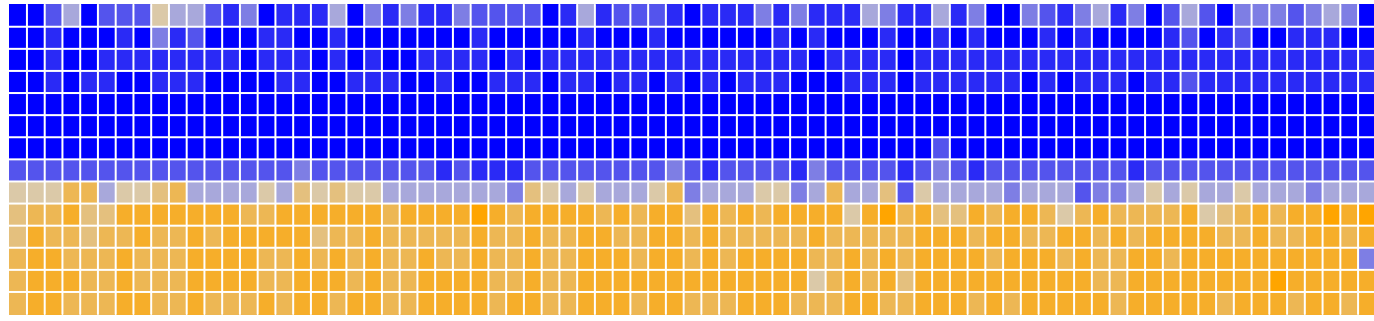

cg22590062  
 cg16357768  
 cg22459320  
 cg04808672  
 cg26186433  
 cg25704638  
 cg04622074  
 cg25629694  
 cg02960948  
 cg25061701  
 cg24851084  
 cg14624950  
 cg00050289  
 cg24878990

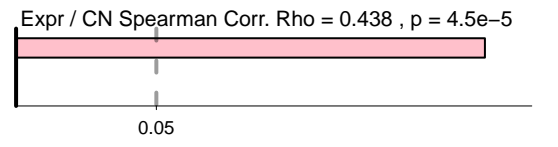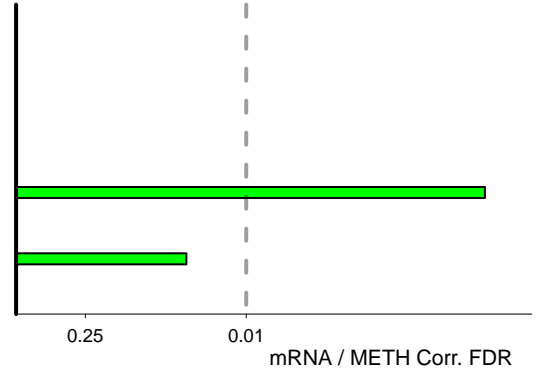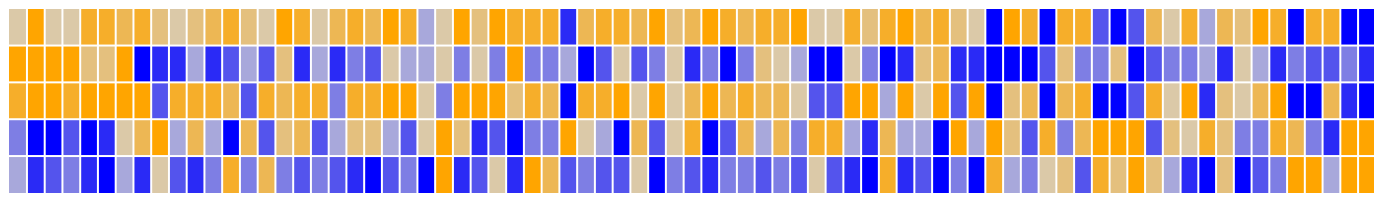

MITF  
 SOX10  
 TRPM1  
 ZEB1  
 AXL

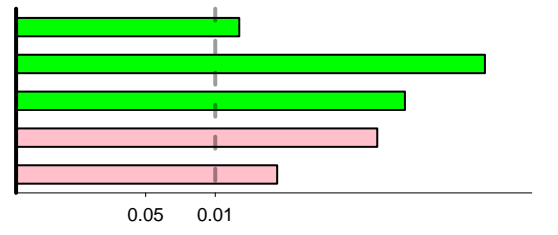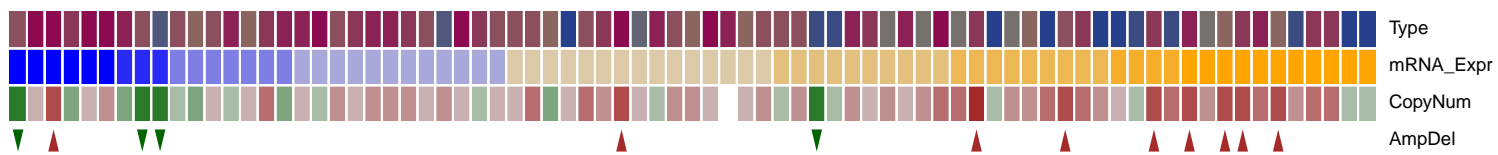

TCGA-D3-A8G1-06  
 TCGA-GN-A8LL-06  
 TCGA-DA-A1IA-06  
 TCGA-FR-A8YD-06  
 TCGA-GN-A4U7-06  
 TCGA-GN-A8LK-06  
 TCGA-FS-A1ZY-06  
 TCGA-FS-A4F9-06  
 TCGA-ER-A19L-06  
 TCGA-DA-A95W-06  
 TCGA-EE-A3T7-06  
 TCGA-FR-A7U8-06  
 TCGA-EE-A29E-06  
 TCGA-FS-A4F5-06  
 TCGA-3N-A9WB-06  
 TCGA-EE-A180-06  
 TCGA-FS-A1ZZ-06  
 TCGA-D3-A8GK-06  
 TCGA-DA-A95Z-06  
 TCGA-D3-A5GL-06  
 TCGA-GN-A28Z-06  
 TCGA-D9-A4Z6-06  
 TCGA-RP-A695-06  
 TCGA-D3-A8GV-06  
 TCGA-WE-A8ZM-06  
 TCGA-D3-A8GL-06  
 TCGA-EE-A29B-06  
 TCGA-RP-A690-06  
 TCGA-EE-A17Z-06  
 TCGA-D3-A1Q1-06  
 TCGA-D9-A6EC-06  
 TCGA-ER-A42K-06  
 TCGA-W3-A824-06  
 TCGA-FS-A1ZK-06  
 TCGA-EE-A185-06  
 TCGA-EE-A2A5-06  
 TCGA-ER-A3ES-06  
 TCGA-FS-A1ZU-06  
 TCGA-FS-A4FB-06  
 TCGA-FS-A1ZG-06  
 TCGA-D3-A1QA-07  
 TCGA-D9-A1X3-06  
 TCGA-FS-A1ZE-06  
 TCGA-FS-A1ZP-06  
 TCGA-FS-A378-06  
 TCGA-WE-A8Z0-06  
 TCGA-EE-A3AD-06  
 TCGA-FS-A4F0-06  
 TCGA-D3-A6CC-06  
 TCGA-D9-A8EG-06  
 TCGA-EE-A3AH-06  
 TCGA-EE-A29L-06  
 TCGA-D3-A3G6-06  
 TCGA-W3-A4Z1-06  
 TCGA-FS-A1ZC-06  
 TCGA-FW-A3I3-06  
 TCGA-FS-A1ZJ-06  
 TCGA-EE-A20H-06  
 TCGA-ER-A19F-06  
 TCGA-EE-A29D-06  
 TCGA-LH-A90B-06  
 TCGA-D3-A1Q5-06  
 TCGA-WE-A8K6-06  
 TCGA-D3-A1QA-06  
 TCGA-GN-A268-06  
 TCGA-EE-A20C-06  
 TCGA-WE-A8JZ-06  
 TCGA-D3-A8GP-06  
 TCGA-EE-A2GR-06  
 TCGA-FS-A1YW-06  
 TCGA-EE-A2MM-06  
 TCGA-D3-A3ML-06  
 TCGA-EE-A3JI-06  
 TCGA-EE-A29A-06  
 TCGA-EE-A2GO-06

# IGFBP6

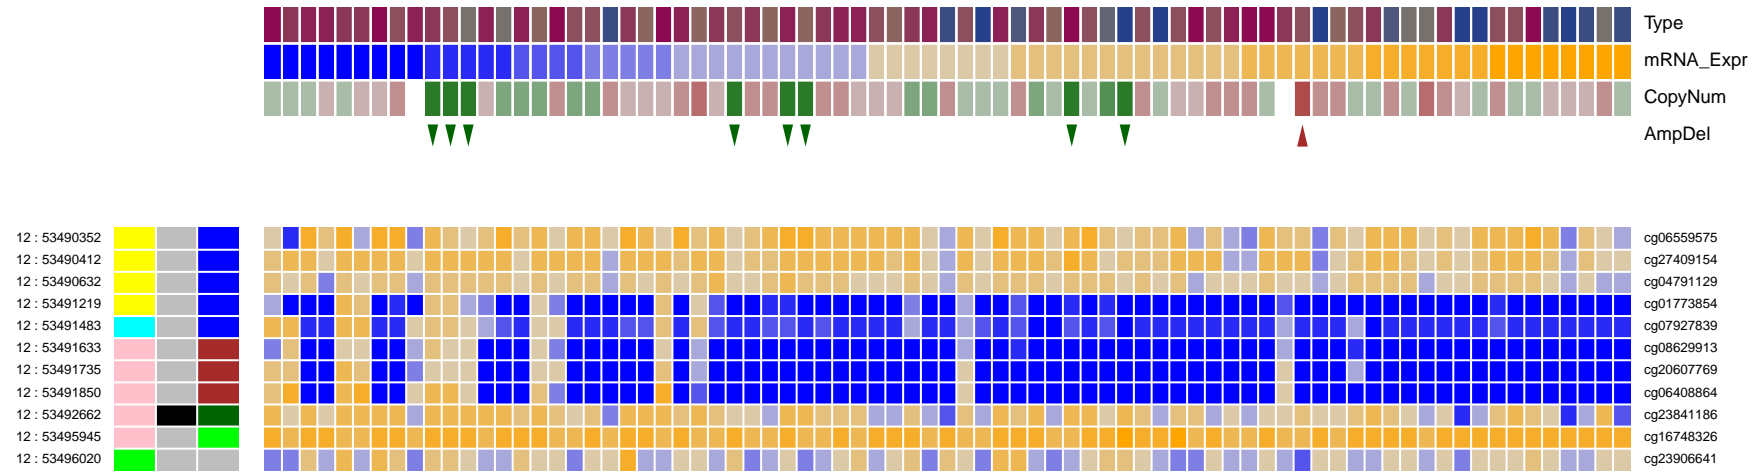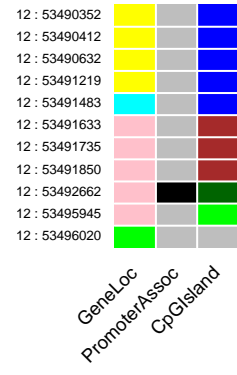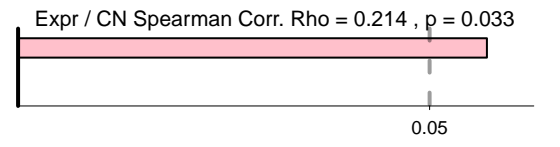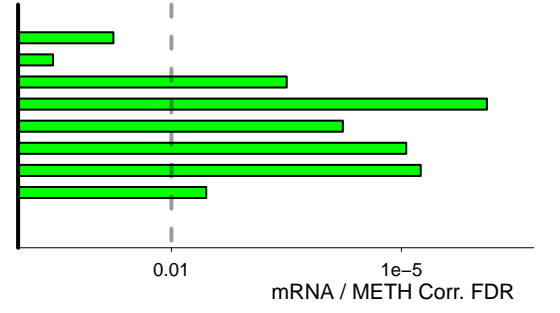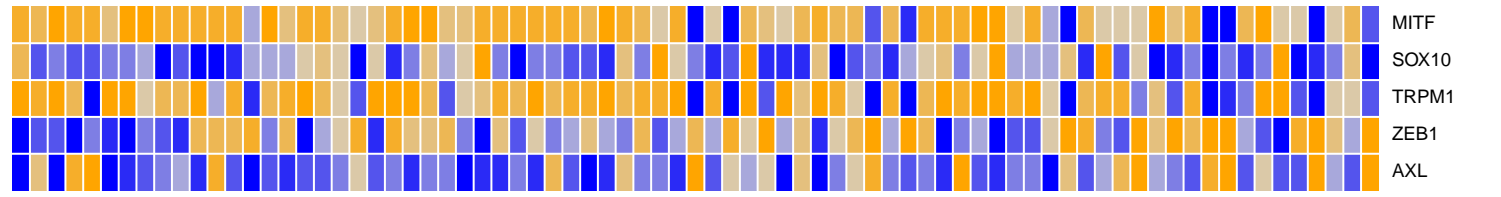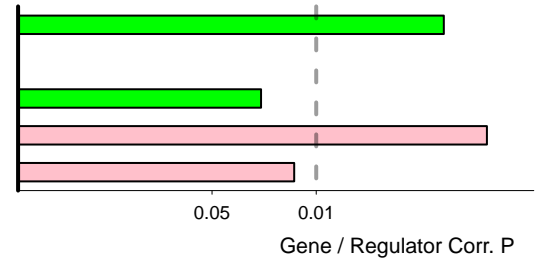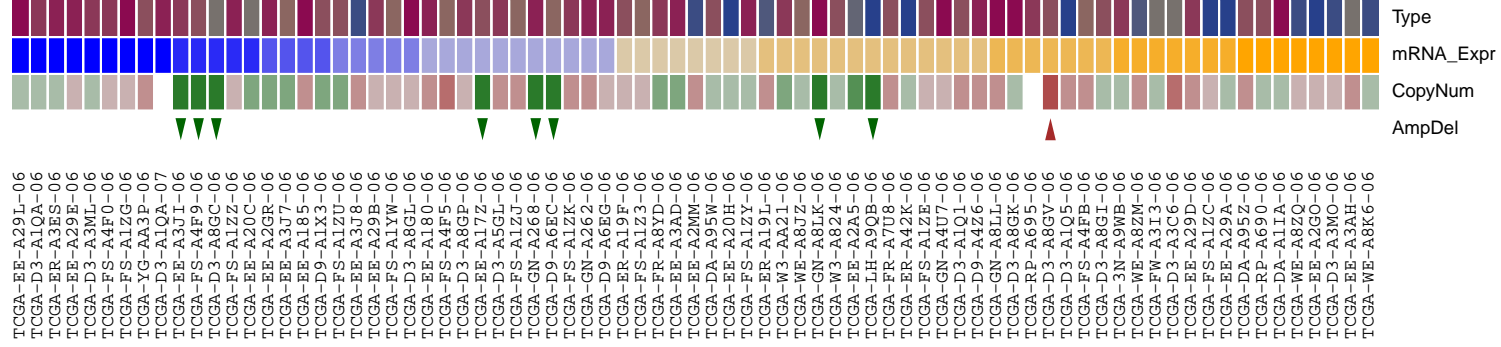

# RRAS

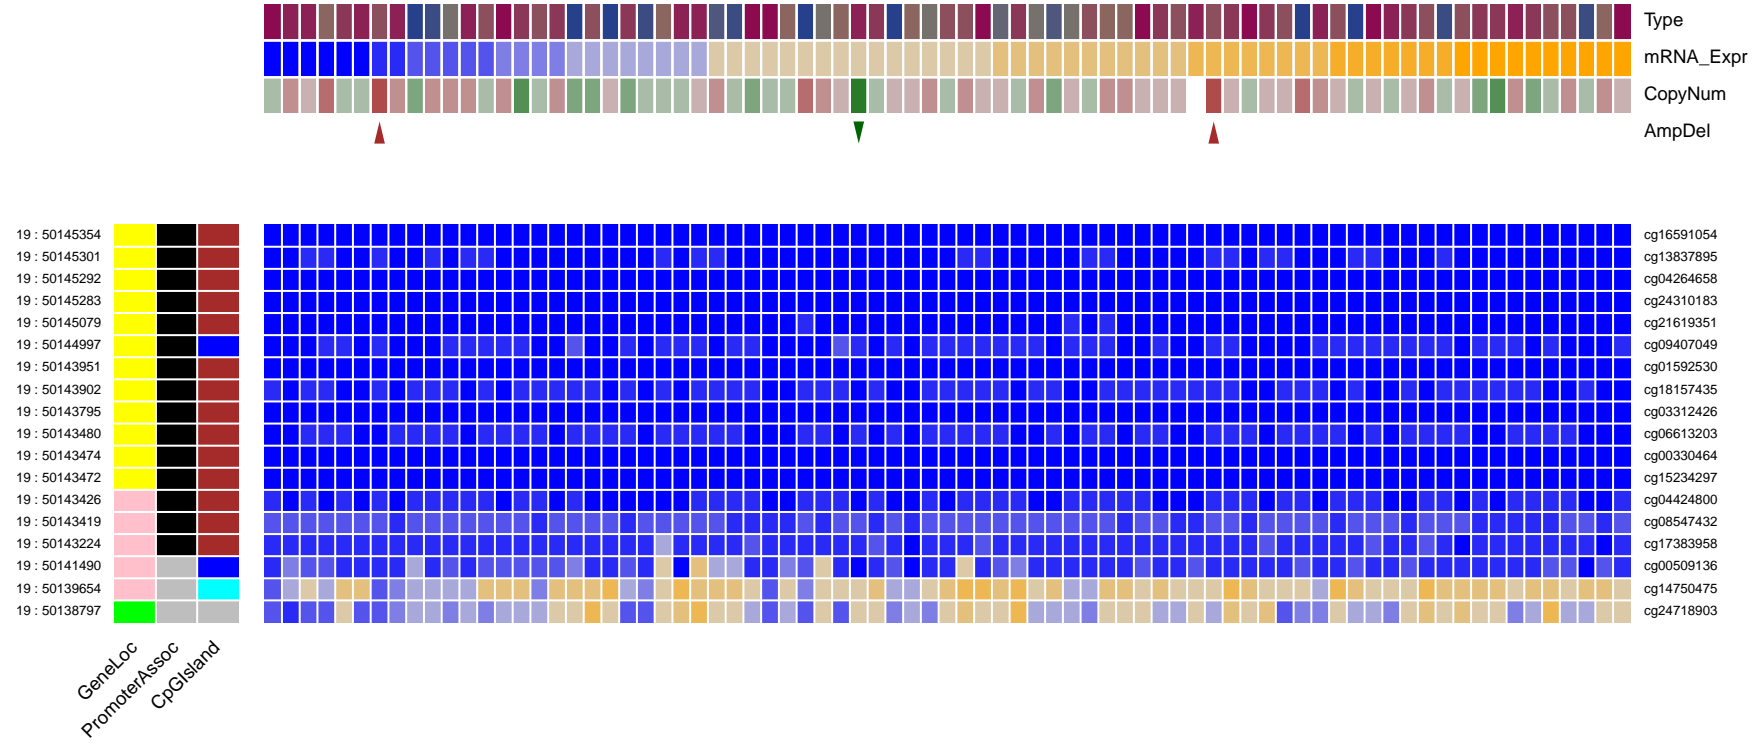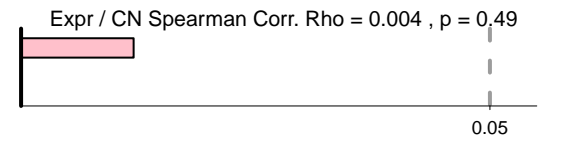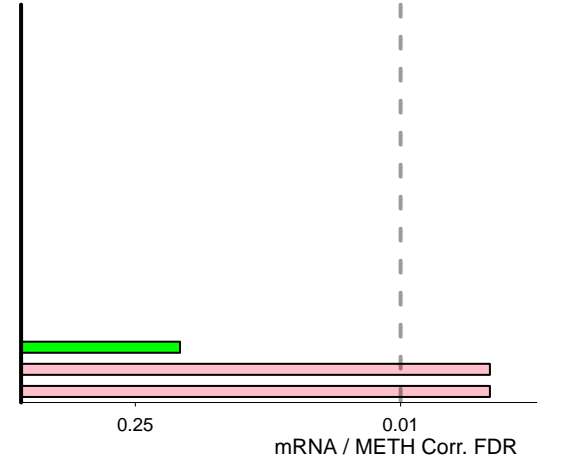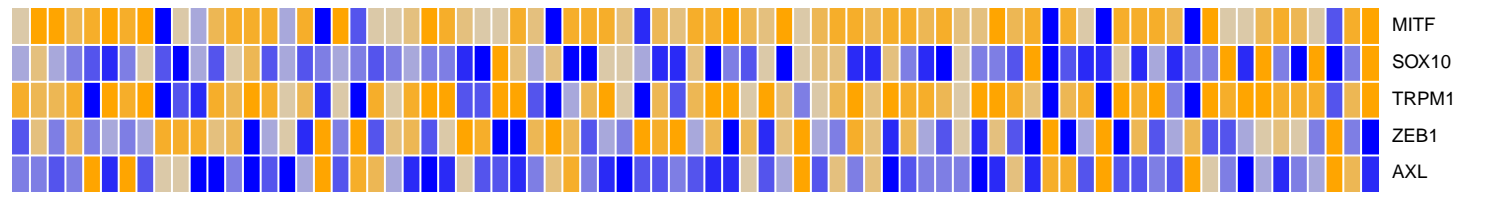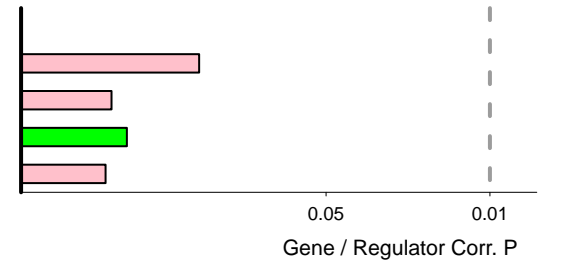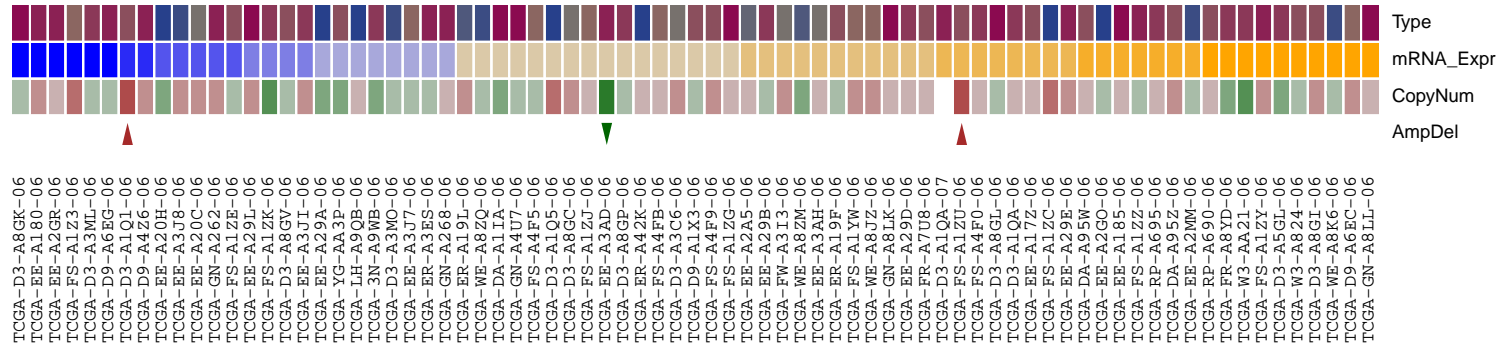

# TGFBR2

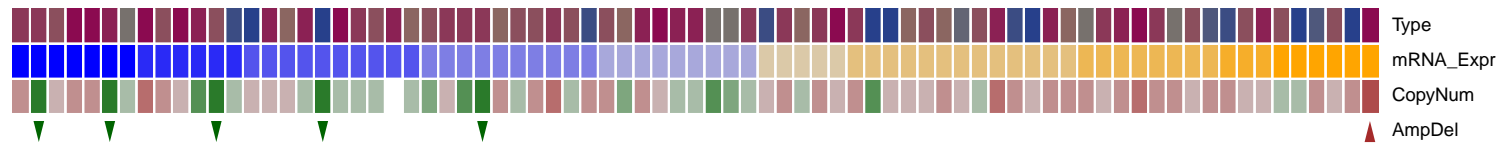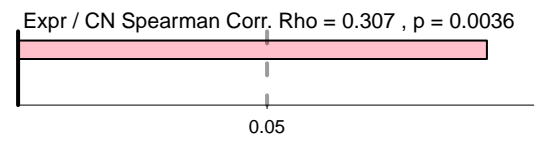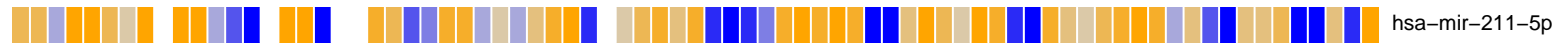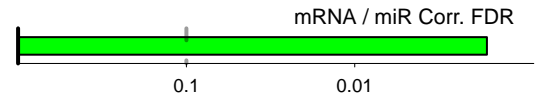

3 : 30647378  
3 : 30647540  
3 : 30647725  
3 : 30647773  
3 : 30647802  
3 : 30647808  
3 : 30647919  
3 : 30647968  
3 : 30647988  
3 : 30648096  
3 : 30648098  
3 : 30648325  
3 : 30648407  
3 : 30648598  
3 : 30648819  
3 : 30648949  
3 : 30649017  
3 : 30651317  
3 : 30667873  
3 : 30673459  
3 : 30684783  
3 : 30689835  
3 : 30691493  
3 : 30698876  
3 : 30700056  
3 : 30702018  
3 : 30706645  
3 : 30708746  
3 : 30714671  
3 : 30722557  
3 : 30730226  
3 : 30733753

GeneLoc  
PromoterAssoc  
CpGIsland

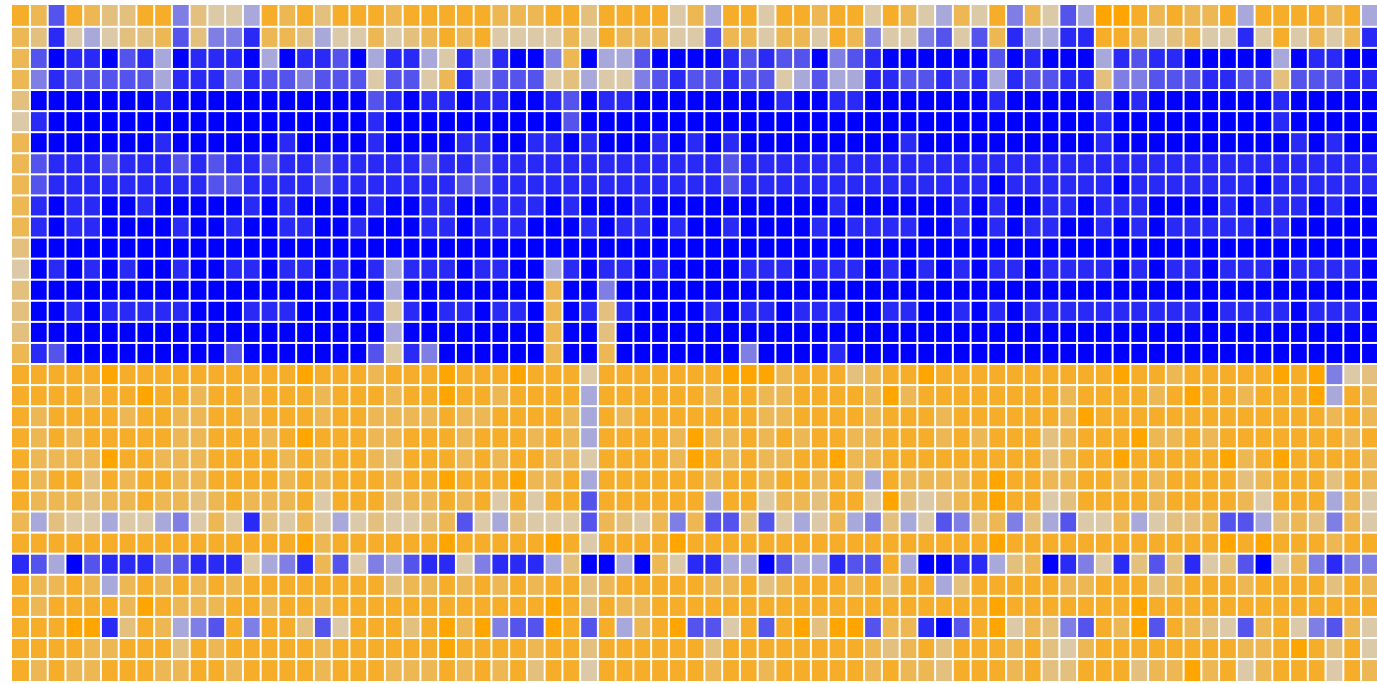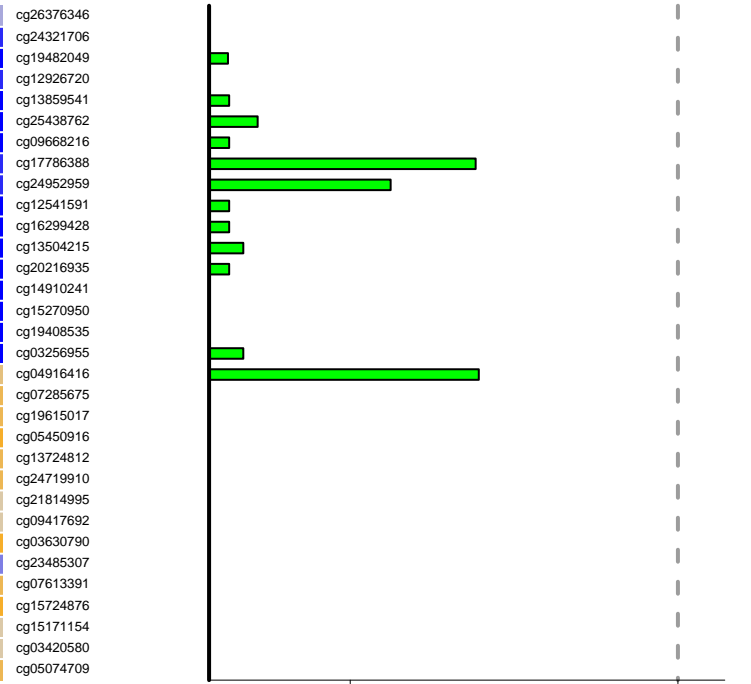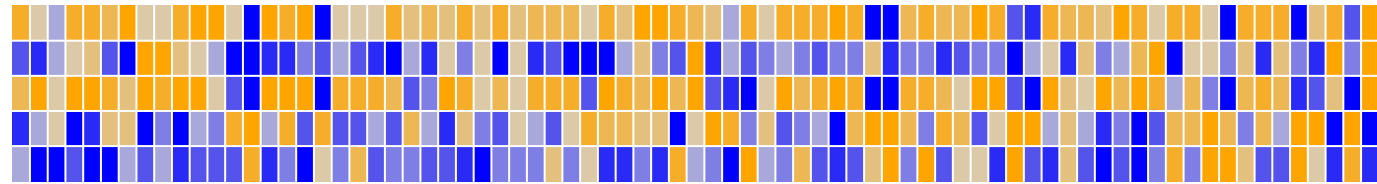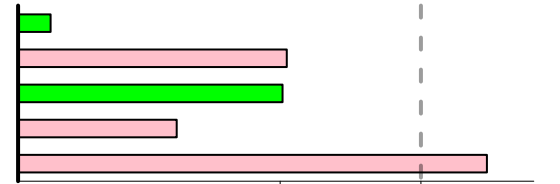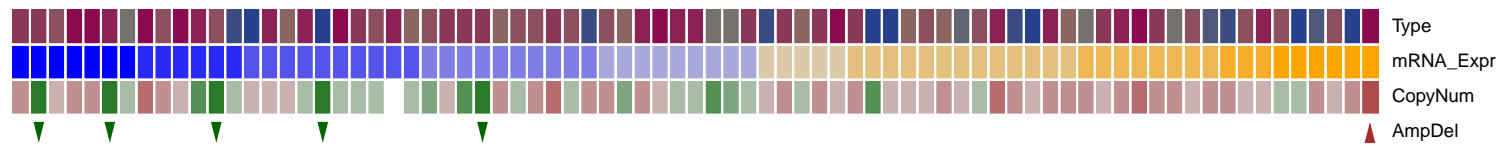

TCGA-EE-A3JI-06  
TCGA-W3-AA21-06  
TCGA-D3-A8GV-06  
TCGA-EE-A185-06  
TCGA-GN-A8LK-06  
TCGA-GN-A262-06  
TCGA-FW-A3I3-06  
TCGA-DA-A1IA-06  
TCGA-D3-A8GI-06  
TCGA-GN-A4U7-06  
TCGA-D9-A4Z6-06  
TCGA-YG-AA3P-06  
TCGA-WE-A8ZO-06  
TCGA-PS-A1ZC-06  
TCGA-D9-A6EG-06  
TCGA-PS-A1Y8-06  
TCGA-EE-A3ES-06  
TCGA-EE-A2D1-06  
TCGA-D3-A8GR-06  
TCGA-SN-A9WB-06  
TCGA-DA-A95W-06  
TCGA-D3-A1QA-07  
TCGA-PS-A4F5-06  
TCGA-DA-A95Z-06  
TCGA-EE-A29B-06  
TCGA-D3-A5GL-06  
TCGA-FS-A1ZJ-06  
TCGA-FS-A1ZU-06  
TCGA-FR-A7U8-06  
TCGA-D3-A1QA-06  
TCGA-W3-A824-06  
TCGA-EE-A3J8-06  
TCGA-FS-A4F9-06  
TCGA-EE-A3J7-06  
TCGA-EE-A180-06  
TCGA-D3-A8GL-06  
TCGA-EE-A29E-06  
TCGA-FS-A1ZY-06  
TCGA-D3-A3C6-06  
TCGA-EE-A20C-06  
TCGA-D3-A3ML-06  
TCGA-D3-A3MO-06  
TCGA-RP-A695-06  
TCGA-D9-A6EC-06  
TCGA-PS-A1ZK-06  
TCGA-PS-A1ZG-06  
TCGA-EE-A29D-06  
TCGA-D3-A1O5-06  
TCGA-EE-A2GO-06  
TCGA-PS-A1Z3-06  
TCGA-D3-A1Q1-06  
TCGA-FS-A4FB-06  
TCGA-EE-A2A5-06  
TCGA-RP-A690-06  
TCGA-WE-A8K6-06  
TCGA-EE-A3AD-06  
TCGA-EE-A3AD-06  
TCGA-WE-A8JZ-06  
TCGA-EE-A3AH-06  
TCGA-FS-A4FO-06  
TCGA-EE-A2GR-06  
TCGA-EE-A29L-06  
TCGA-FR-A8YD-06  
TCGA-D3-A8GC-06  
TCGA-FS-A1ZE-06  
TCGA-WE-A8ZM-06  
TCGA-EE-A2MM-06  
TCGA-ER-A19F-06  
TCGA-FS-A1ZZ-06  
TCGA-D9-A1X3-06  
TCGA-EE-A29A-06  
TCGA-ER-A19L-06  
TCGA-EE-A17Z-06  
TCGA-LH-A9QB-06  
TCGA-GN-A8LL-06

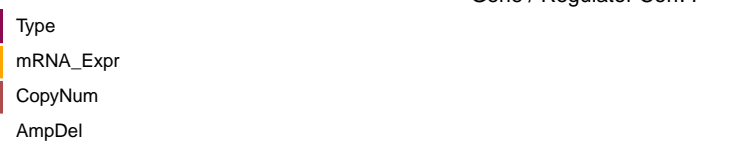

Gene / Regulator Corr. P

TPM1

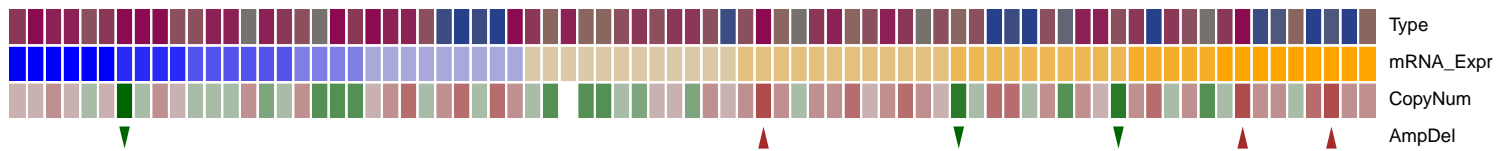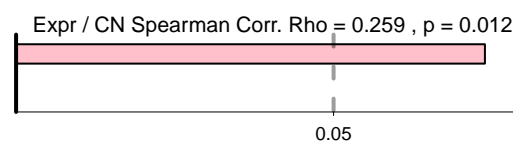

15 : 63333476  
 15 : 63333792  
 15 : 63333846  
 15 : 63334355  
 15 : 63334436  
 15 : 63334506  
 15 : 63334699  
 15 : 63334703  
 15 : 63334706  
 15 : 63334714  
 15 : 63334761  
 15 : 63334937  
 15 : 63335016  
 15 : 63335302  
 15 : 63336009  
 15 : 63337352  
 15 : 63337496  
 15 : 63339148  
 15 : 63340323  
 15 : 63340331  
 15 : 63340396  
 15 : 63340444  
 15 : 63340515  
 15 : 63340581  
 15 : 63340700  
 15 : 63341214  
 15 : 63341381  
 15 : 63341463  
 15 : 63342033  
 15 : 63345124  
 15 : 63345512  
 15 : 63349192  
 15 : 63353166  
 15 : 63355027  
 15 : 63356886  
 15 : 63358260  
 15 : 63358672  
 15 : 63360929  
 15 : 63363890

Geneloc  
 PromoterAssoc  
 CpGisland

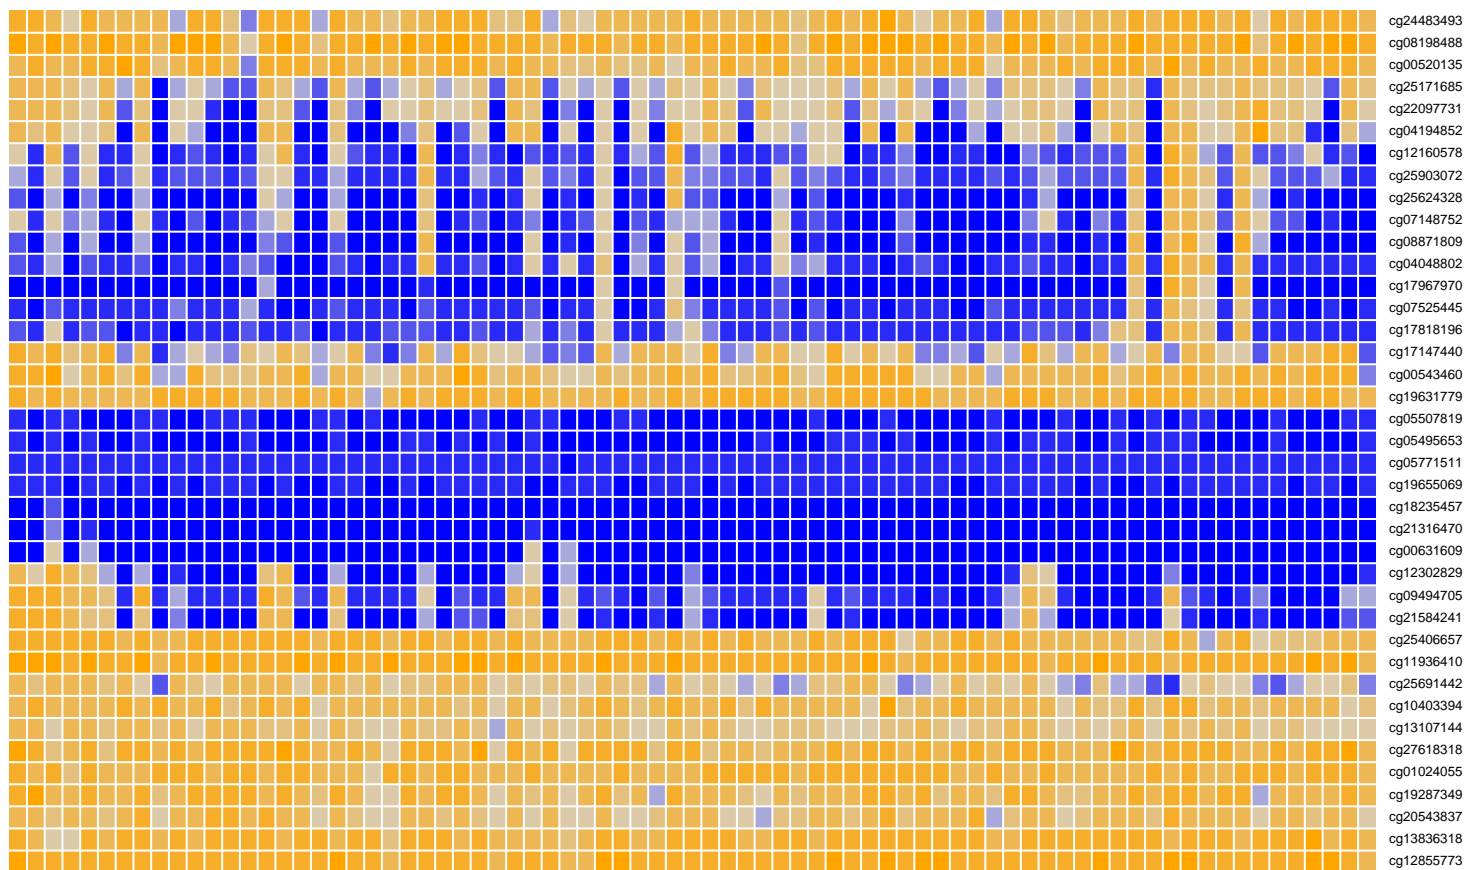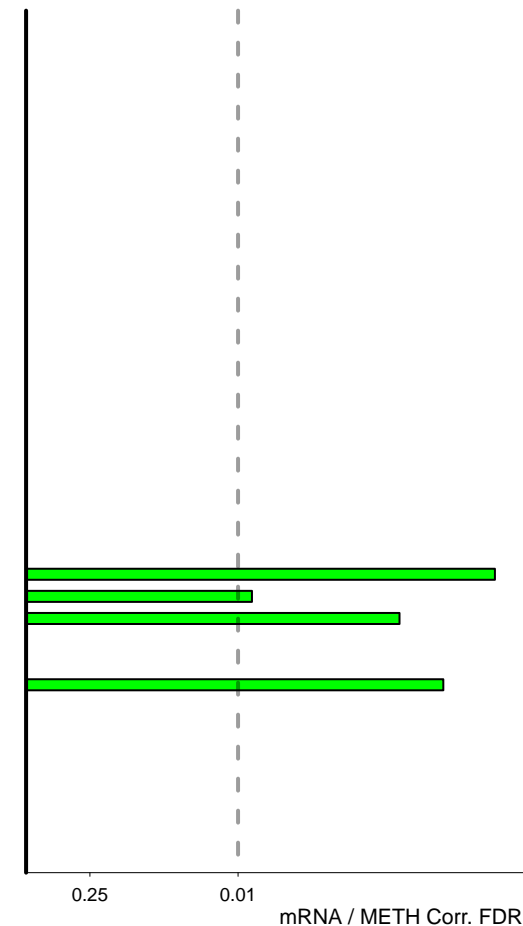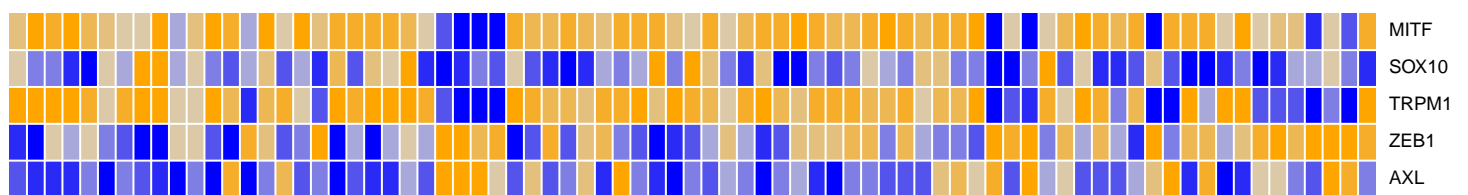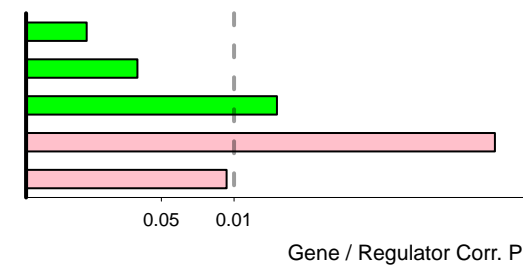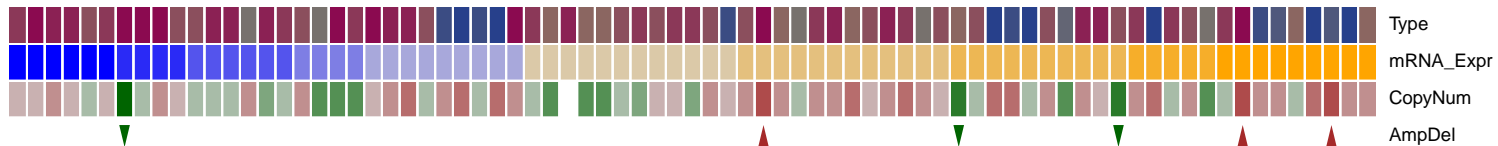

TCGA-EE-A29B-06  
 TCGA-FS-A1ZG-06  
 TCGA-GN-A268-06  
 TCGA-D9-A6EG-06  
 TCGA-W3-A824-06  
 TCGA-D3-A8GF-06  
 TCGA-DA-A1IA-06  
 TCGA-GN-A8LL-06  
 TCGA-D3-A8GV-06  
 TCGA-FS-A1ZU-06  
 TCGA-ER-A3ES-06  
 TCGA-EE-A29B-06  
 TCGA-EE-A20C-06  
 TCGA-EE-A180-06  
 TCGA-3N-A9WB-06  
 TCGA-7C-AA3E-06  
 TCGA-D9-A2G6-06  
 TCGA-EE-A29L-06  
 TCGA-FS-A1ZK-06  
 TCGA-EE-A3AD-06  
 TCGA-FS-A1ZY-06  
 TCGA-DA-A95W-06  
 TCGA-WE-A8K6-06  
 TCGA-EE-A2GO-06  
 TCGA-EE-A2MM-06  
 TCGA-EE-A20H-06  
 TCGA-EE-A185-06  
 TCGA-D3-A1QA-06  
 TCGA-FS-A4FB-06  
 TCGA-D3-A1QA-07  
 TCGA-WE-A8JZ-06  
 TCGA-EE-A3J7-06  
 TCGA-D3-A1Q1-06  
 TCGA-RP-A695-06  
 TCGA-EE-A17Z-06  
 TCGA-FS-A4F0-06  
 TCGA-FR-A8YD-06  
 TCGA-D9-A1X3-06  
 TCGA-D3-A3MO-06  
 TCGA-FR-A7U8-06  
 TCGA-GN-A8LK-06  
 TCGA-FS-A1ZJ-06  
 TCGA-FW-A3I3-06  
 TCGA-D3-A5GJ-06  
 TCGA-GN-A262-06  
 TCGA-FS-A1Z3-06  
 TCGA-ER-A1ZE-06  
 TCGA-EE-A2GR-06  
 TCGA-EE-A29D-06  
 TCGA-EE-A3AH-06  
 TCGA-ER-A19F-06  
 TCGA-RP-A690-06  
 TCGA-FS-A1ZC-06  
 TCGA-WE-A8ZQ-06  
 TCGA-EE-A29A-06  
 TCGA-D3-A8GI-06  
 TCGA-EE-A2A5-06  
 TCGA-D9-A4Z6-06  
 TCGA-FS-A1ZZ-06  
 TCGA-DA-A95Z-06  
 TCGA-EE-A3JI-06  
 TCGA-D3-A1Q5-06  
 TCGA-D3-A3ML-06  
 TCGA-FS-A4F9-06  
 TCGA-D3-A8GC-06  
 TCGA-W3-AA21-06  
 TCGA-D3-A8GL-06  
 TCGA-EE-A3J8-06  
 TCGA-ER-A19L-06  
 TCGA-FS-A4F5-06  
 TCGA-ER-A42K-06  
 TCGA-WE-A8ZM-06  
 TCGA-LH-A9QB-06  
 TCGA-FS-A1YW-06

# BDNF

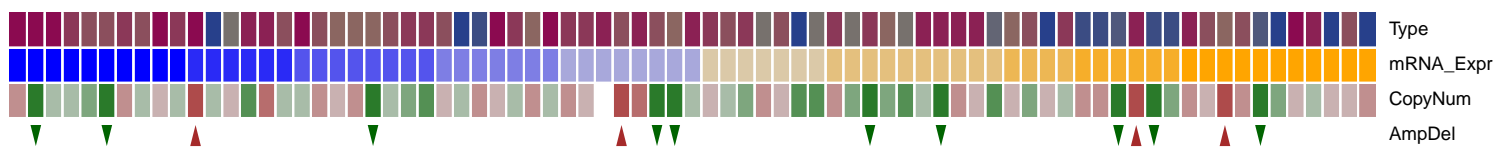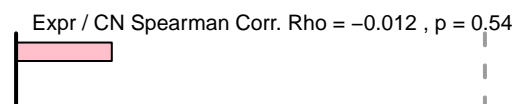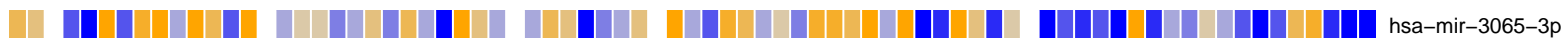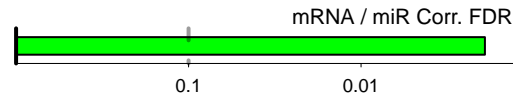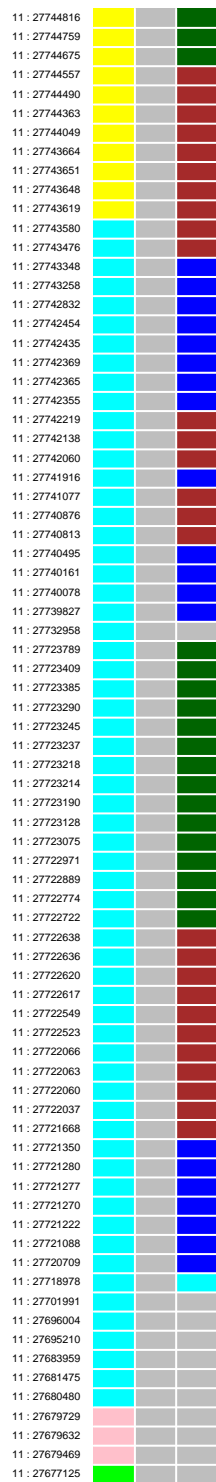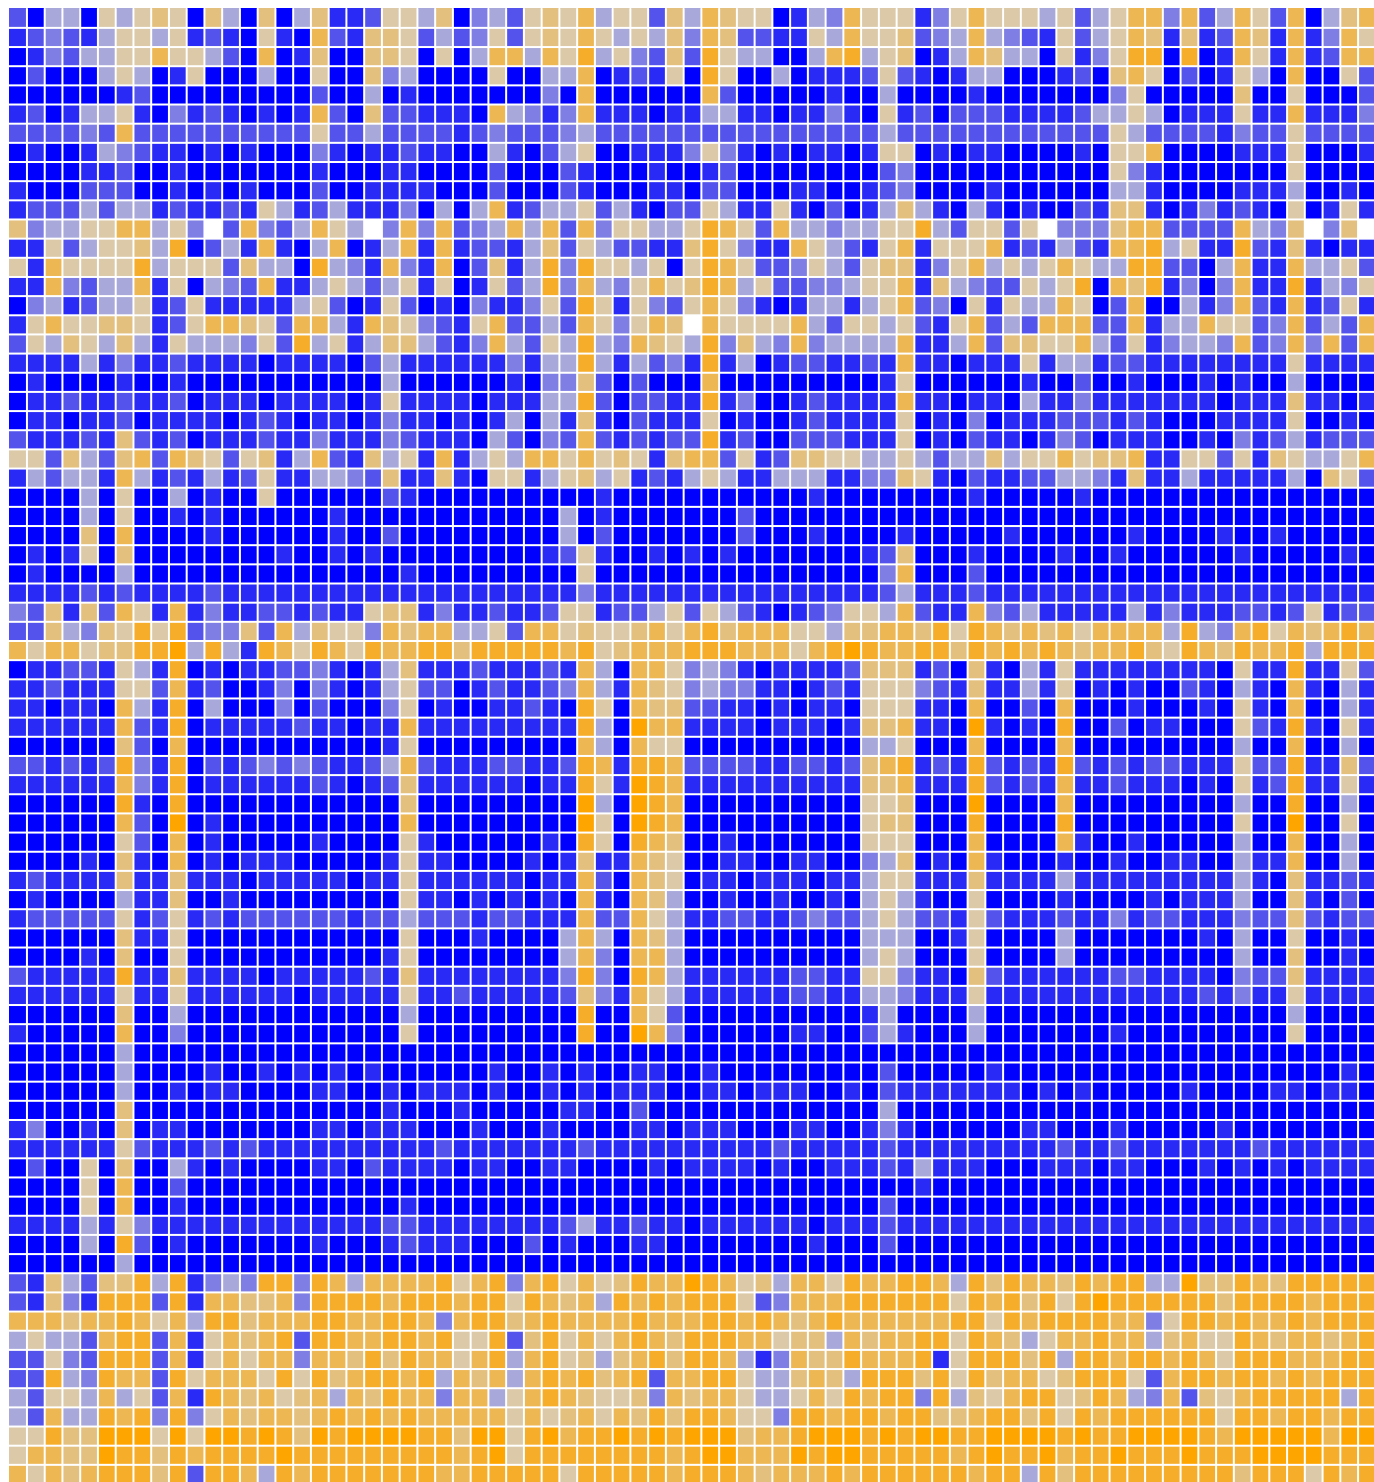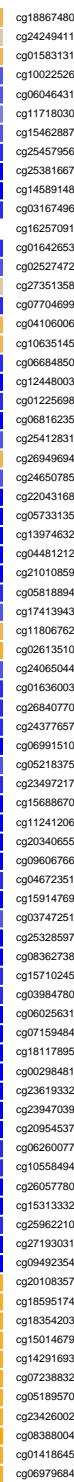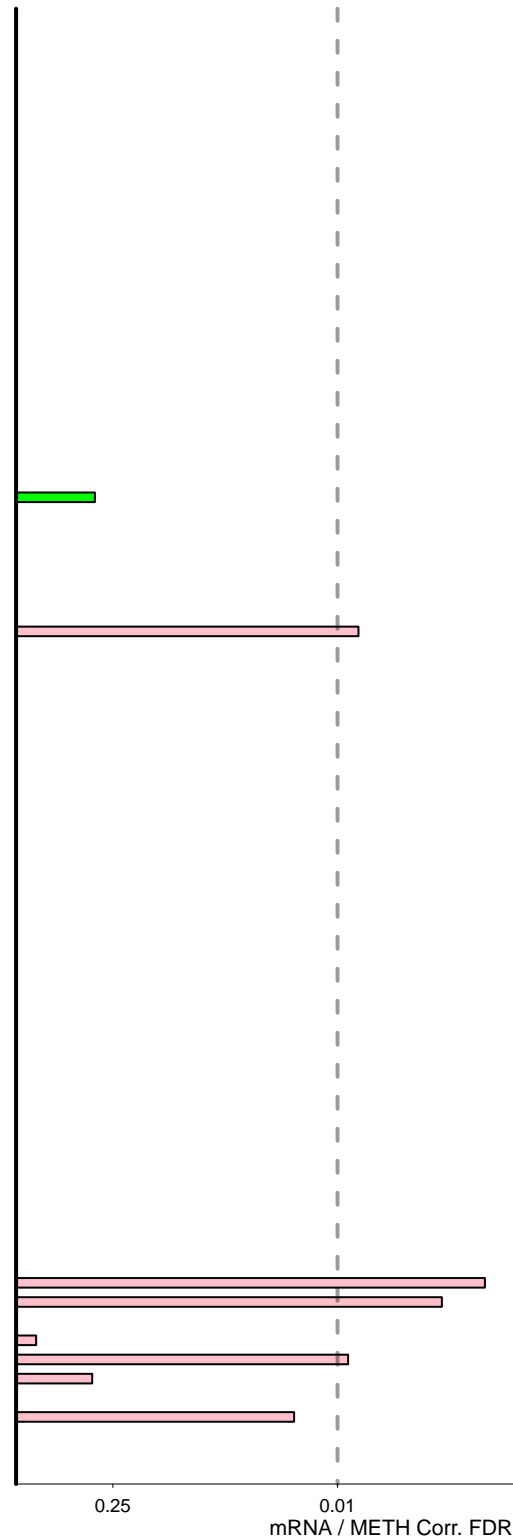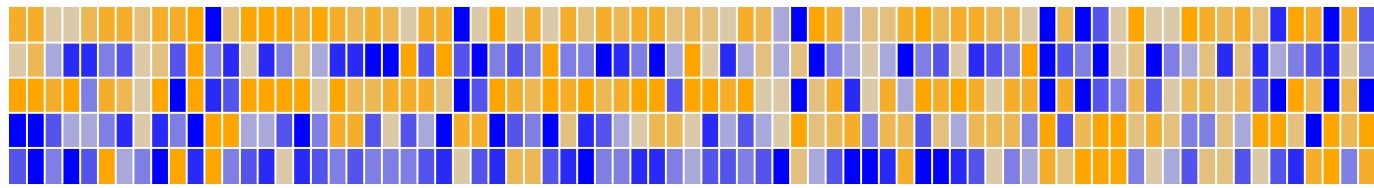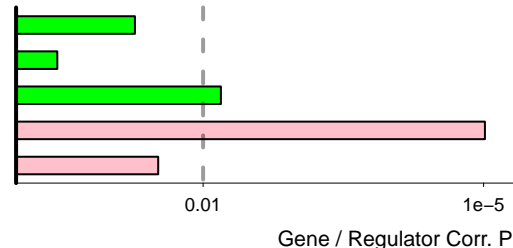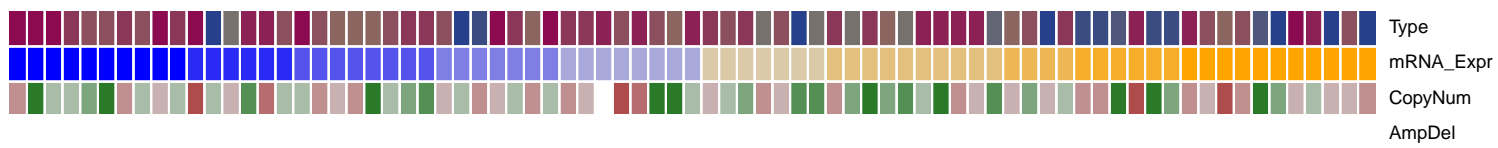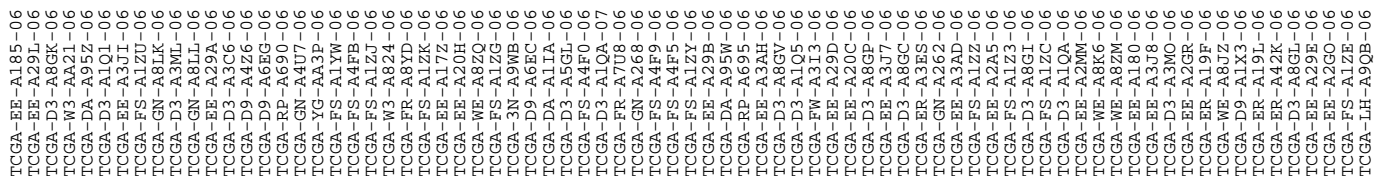



# GBP1

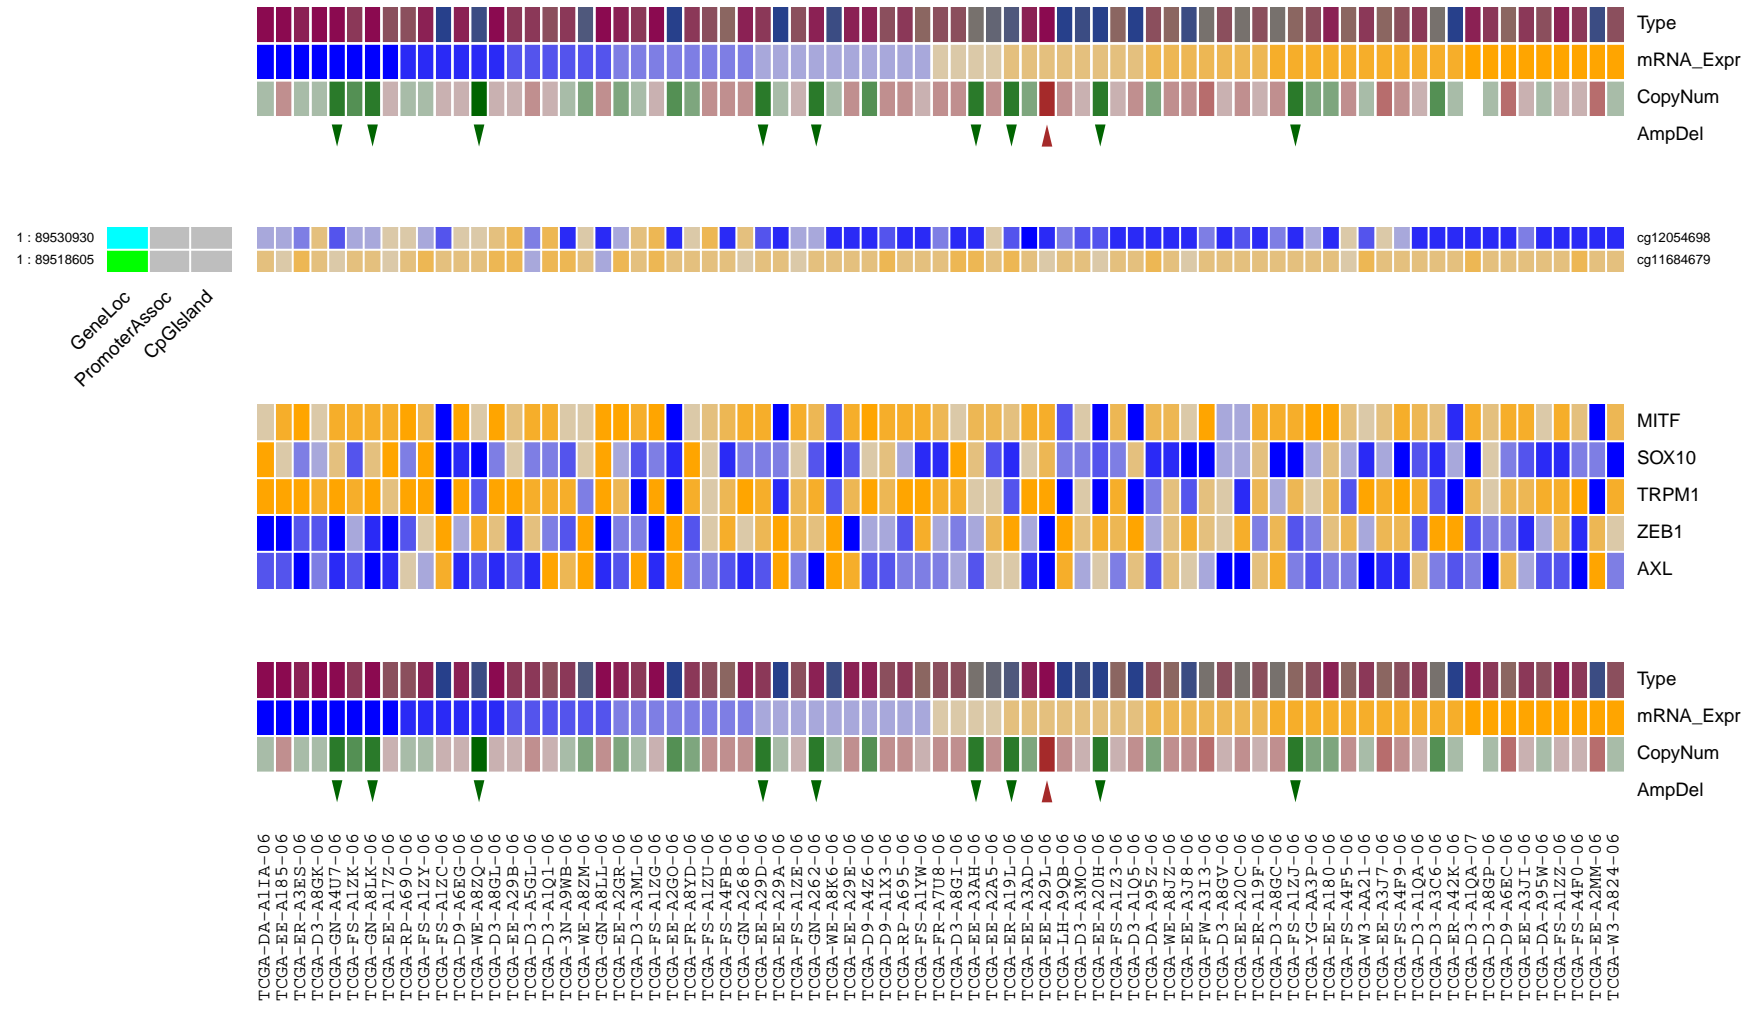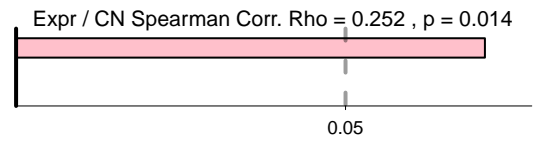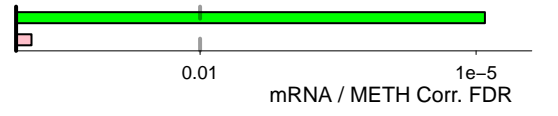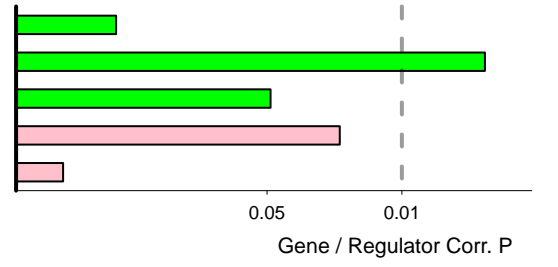

# SRPX2

X : 99898347  
 X : 99898590  
 X : 99898921  
 X : 99898930  
 X : 99899134  
 X : 99899345  
 X : 99899348  
 X : 99899378  
 X : 99917334

Geneloc  
 PromoterAssoc  
 CpGIsland

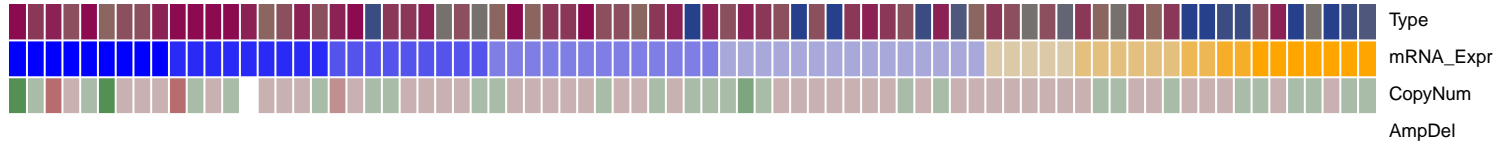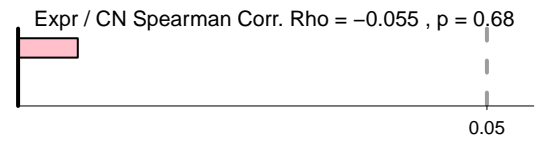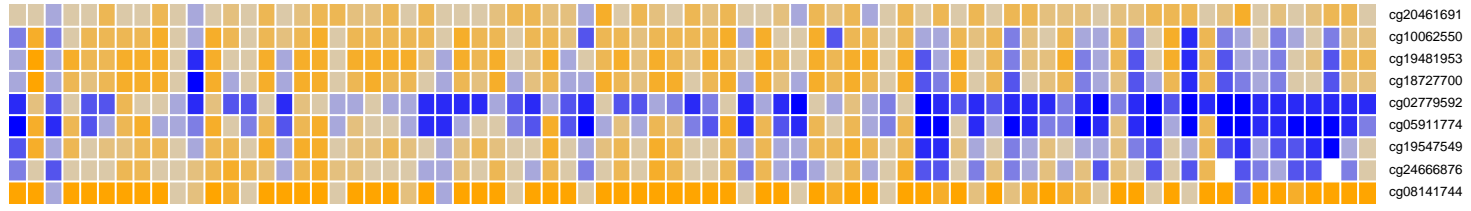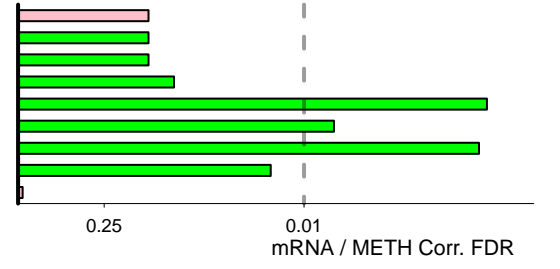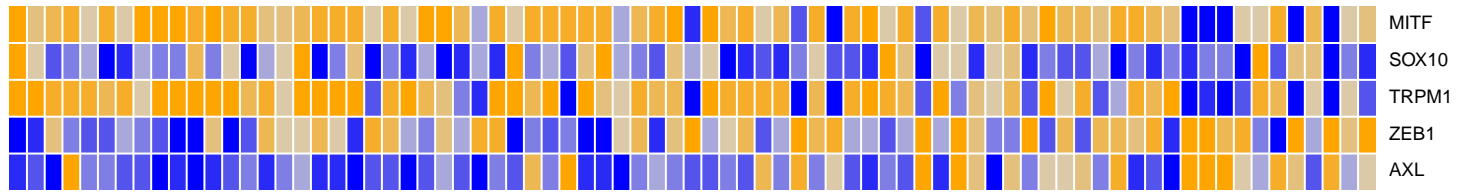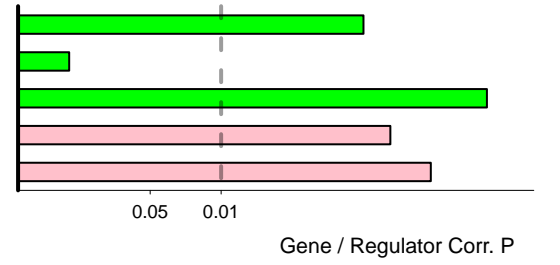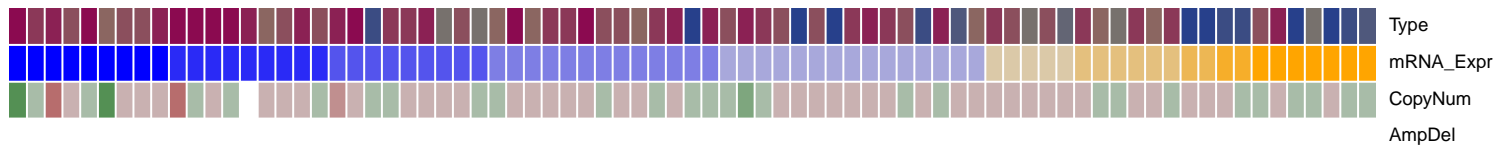

TCGA-GN-A8LL-06  
 TCGA-EE-A29B-06  
 TCGA-GN-A262-06  
 TCGA-D3-A1Q1-06  
 TCGA-D3-A8GK-06  
 TCGA-FS-A1ZJ-06  
 TCGA-DA-A95W-06  
 TCGA-YG-AA3P-06  
 TCGA-ER-A3ES-06  
 TCGA-FS-A1ZG-06  
 TCGA-EE-A29I-06  
 TCGA-D3-A8GI-06  
 TCGA-EE-A185-06  
 TCGA-D3-A1O3-07  
 TCGA-EE-A3J7-06  
 TCGA-FS-A1ZU-06  
 TCGA-FS-A1ZY-06  
 TCGA-FS-A1F9-06  
 TCGA-FS-A268-06  
 TCGA-GN-A8LK-06  
 TCGA-WE-A8Z0-06  
 TCGA-EE-A29D-06  
 TCGA-W3-AA21-06  
 TCGA-EE-A2GR-06  
 TCGA-FW-A3I3-06  
 TCGA-DA-A95Z-06  
 TCGA-EE-A20C-06  
 TCGA-FS-A1YW-06  
 TCGA-DA-A1IA-06  
 TCGA-D9-A6EC-06  
 TCGA-RP-A695-06  
 TCGA-D3-A3ML-06  
 TCGA-GN-A4U7-06  
 TCGA-EE-A17Z-06  
 TCGA-FS-A1Z3-06  
 TCGA-EE-A3JI-06  
 TCGA-EE-A180-06  
 TCGA-ER-A42K-06  
 TCGA-D9-A4Z6-06  
 TCGA-W3-A824-06  
 TCGA-FS-A1ZZ-06  
 TCGA-3N-A9WB-06  
 TCGA-FE-A7U8-06  
 TCGA-LH-A9OB-06  
 TCGA-FS-A1ZF-06  
 TCGA-EE-A20H-06  
 TCGA-FS-A1ZK-06  
 TCGA-D9-A6EG-06  
 TCGA-EE-A8YD-06  
 TCGA-FO-A1X3-06  
 TCGA-WE-A8K6-06  
 TCGA-EE-A3AD-06  
 TCGA-WE-A8ZM-06  
 TCGA-WE-A8JZ-06  
 TCGA-D3-A8GE-06  
 TCGA-ER-A19F-06  
 TCGA-D3-A3C6-06  
 TCGA-RP-A690-06  
 TCGA-EE-A2A5-06  
 TCGA-D3-A1QA-06  
 TCGA-FS-A4F5-06  
 TCGA-D3-A8GC-06  
 TCGA-D3-A5GL-06  
 TCGA-FS-A4FB-06  
 TCGA-FS-A4FO-06  
 TCGA-EE-A2GO-06  
 TCGA-EE-A29A-06  
 TCGA-EE-A2MM-06  
 TCGA-EE-A3J8-06  
 TCGA-D3-A8GI-06  
 TCGA-EE-A29E-06  
 TCGA-D3-A1O5-06  
 TCGA-EE-A3AH-06  
 TCGA-FS-A1ZC-06  
 TCGA-D3-A3MO-06  
 TCGA-EE-A19I-06

# SMAGP

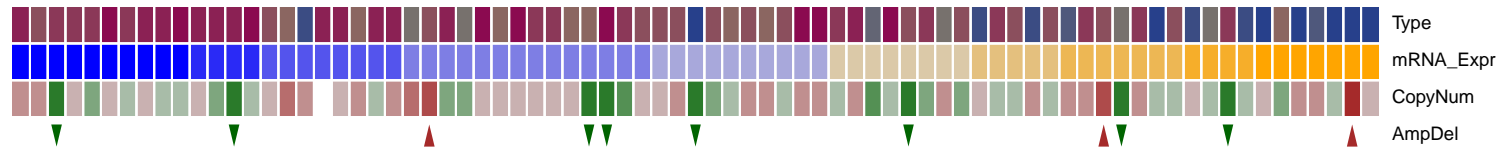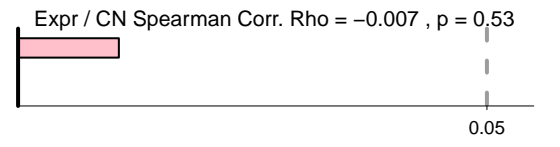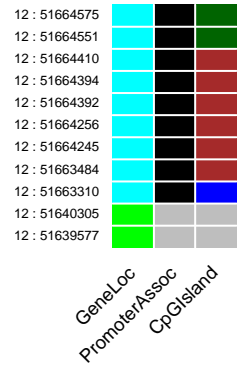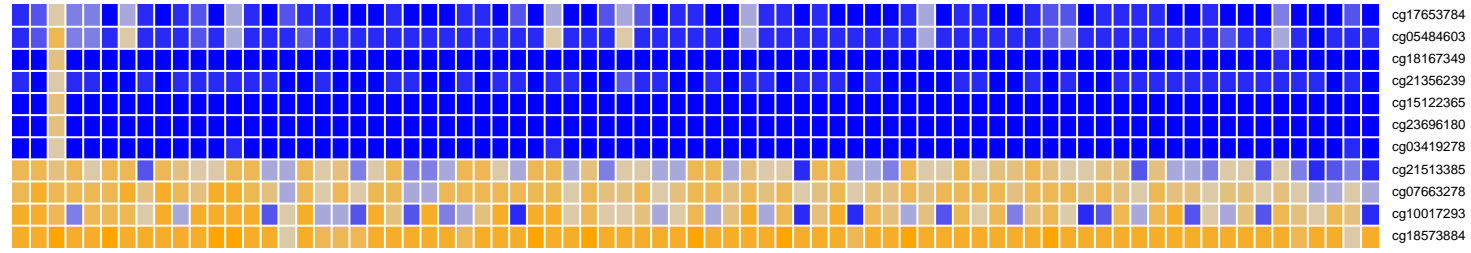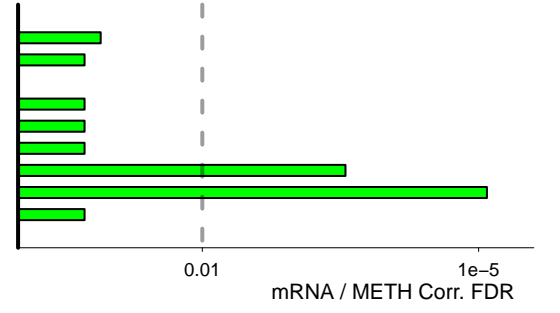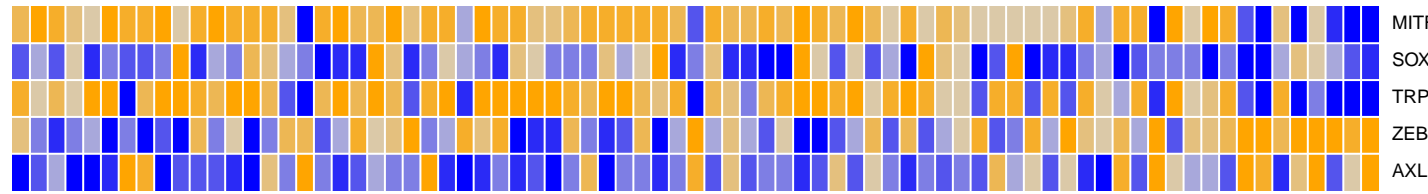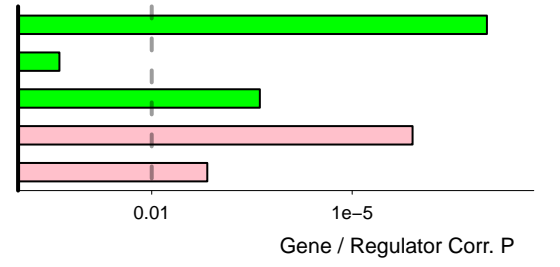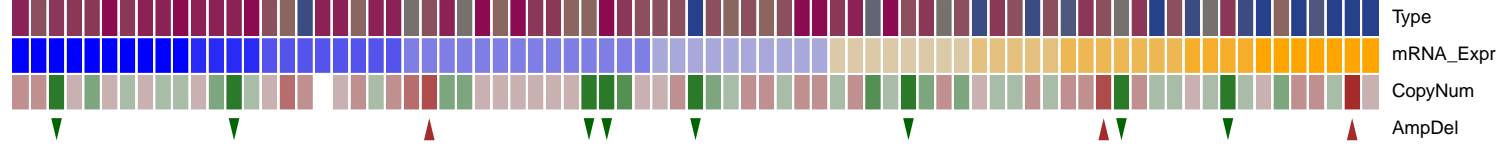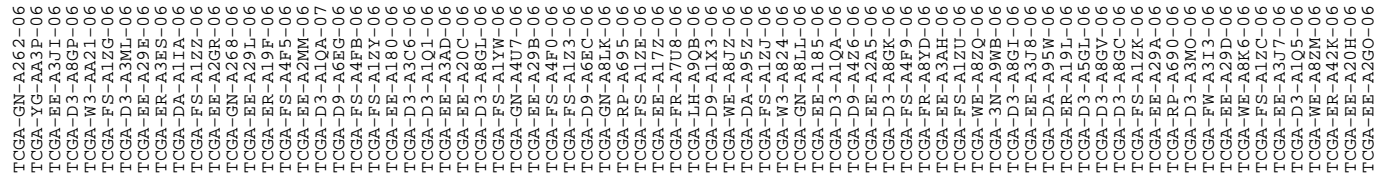

# EXT1

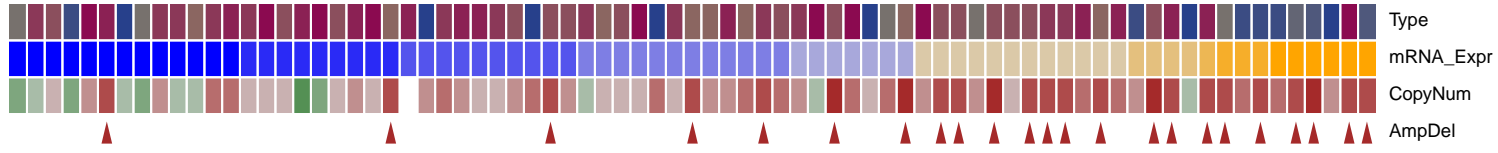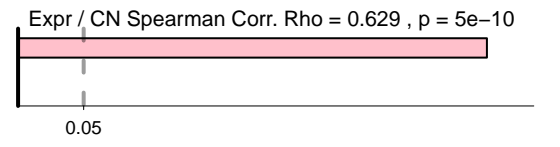

8: 119125345  
 8: 119124790  
 8: 119124462  
 8: 119124311  
 8: 119124108  
 8: 119124103  
 8: 119123707  
 8: 119123269  
 8: 119123054  
 8: 119122878  
 8: 119122430  
 8: 119121281  
 8: 119120052  
 8: 119110466  
 8: 119101196  
 8: 119097956  
 8: 119088760  
 8: 119086762  
 8: 119086710  
 8: 119086580  
 8: 119083946  
 8: 119081939  
 8: 119073725  
 8: 119065431  
 8: 119064312  
 8: 119049938  
 8: 119047535  
 8: 119045287  
 8: 119043482  
 8: 119038325  
 8: 119036478  
 8: 119024055  
 8: 119018141  
 8: 119011673  
 8: 119003617  
 8: 118993090  
 8: 118991759  
 8: 118968448  
 8: 118960159  
 8: 118941962  
 8: 118939185  
 8: 118923048  
 8: 118912508  
 8: 118909058  
 8: 118897243  
 8: 118896248  
 8: 118893219  
 8: 118849022  
 8: 118843355  
 8: 118837943  
 8: 118825173

GeneLoc  
 PromoterAssoc  
 CpCIsland

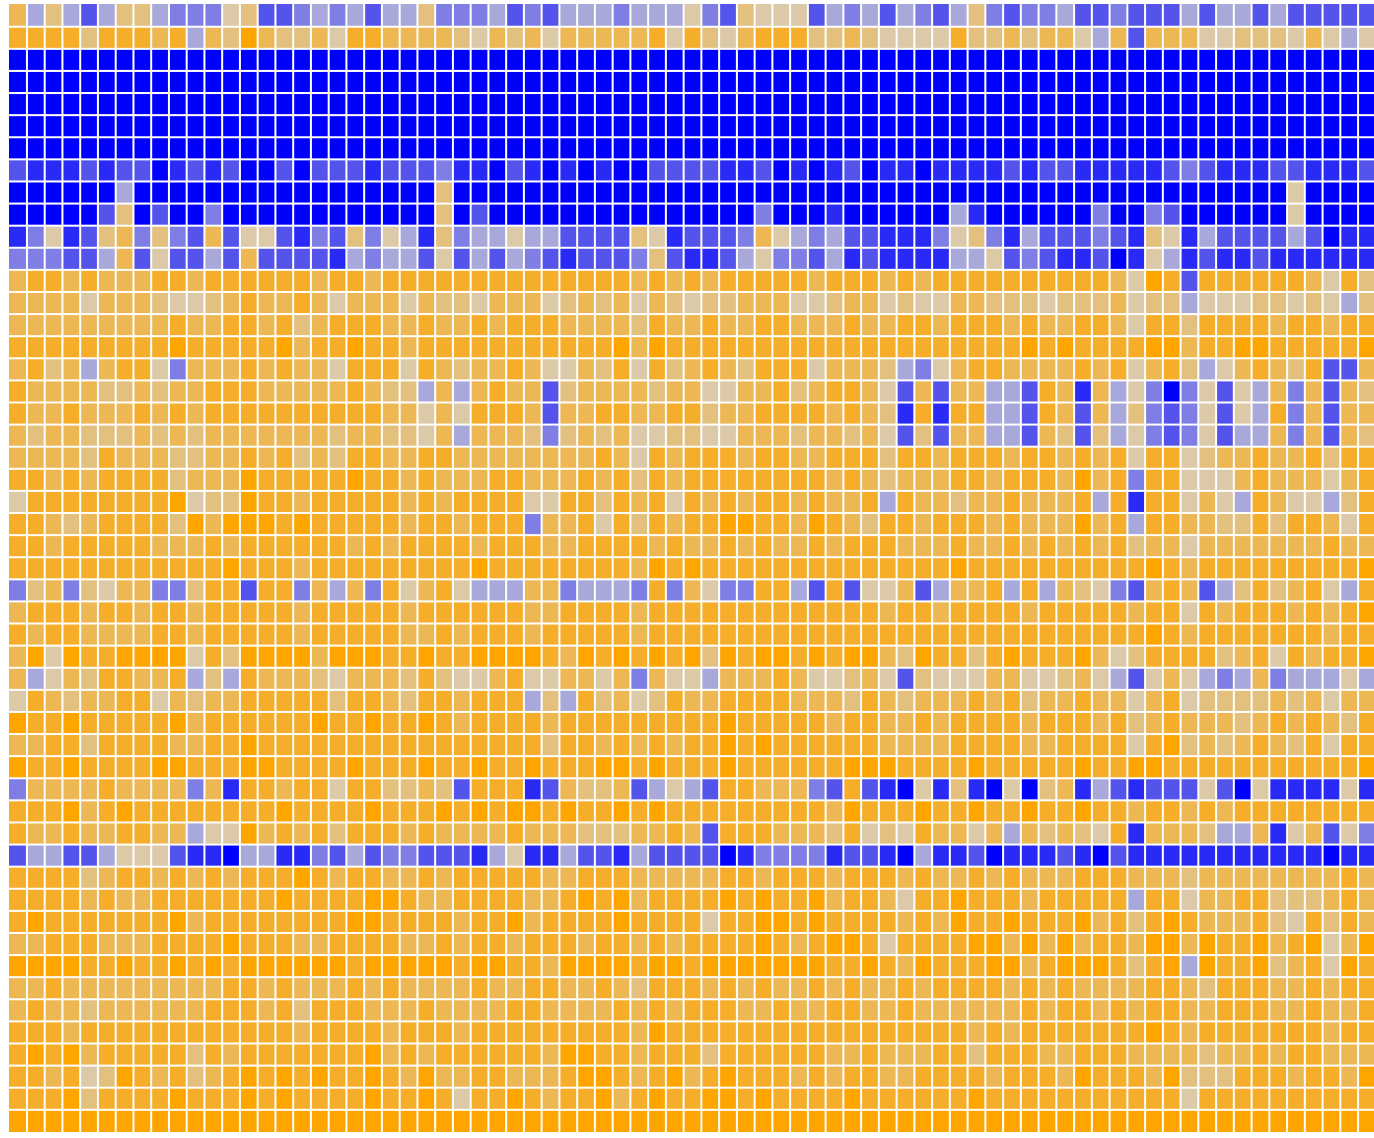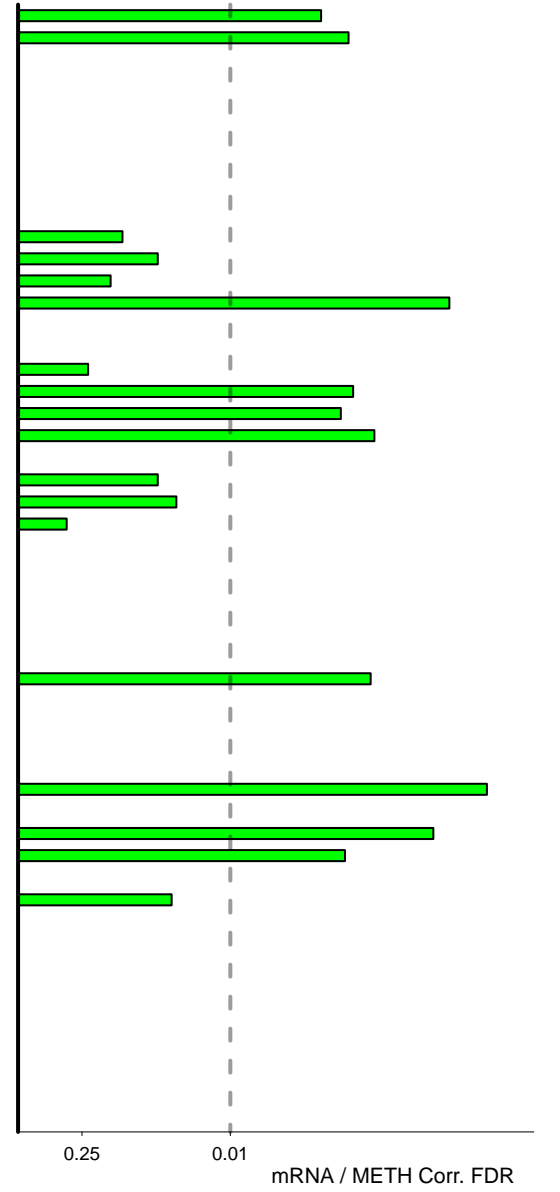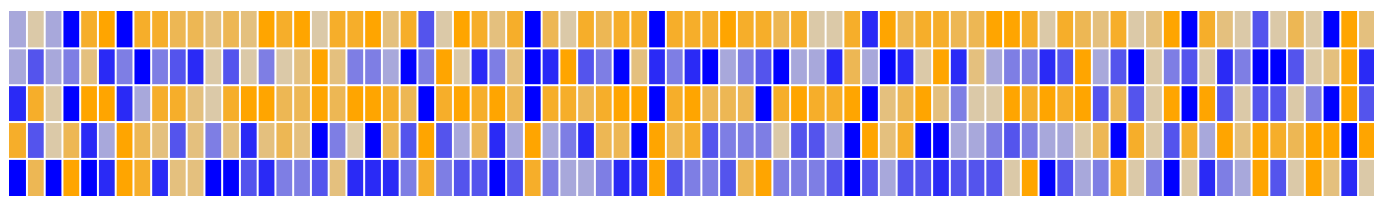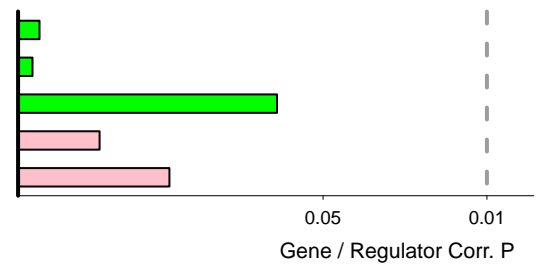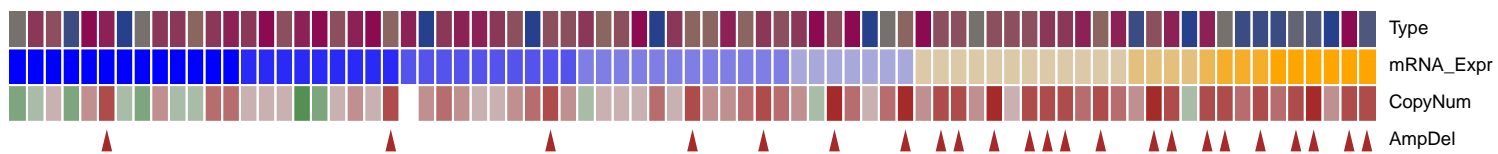

TCGA-EE-A20C-06  
 TCGA-3N-A9WB-06  
 TCGA-D3-ABGV-06  
 TCGA-EE-A2MM-06  
 TCGA-GN-A8LK-06  
 TCGA-D9-A6EG-06  
 TCGA-ER-A29A-06  
 TCGA-D3-ABGC-06  
 TCGA-D3-A5GL-06  
 TCGA-WE-A8TZ-06  
 TCGA-D3-ABGP-06  
 TCGA-GN-A262-06  
 TCGA-EE-A29B-06  
 TCGA-D3-ABGL-06  
 TCGA-FS-A1ZE-06  
 TCGA-ER-A180-06  
 TCGA-DA-A1IA-06  
 TCGA-ER-A19F-06  
 TCGA-GN-A268-06  
 TCGA-FS-A1ZG-06  
 TCGA-EE-A3J7-06  
 TCGA-D3-A1QA-07  
 TCGA-LH-A9QB-06  
 TCGA-FR-ABYD-06  
 TCGA-D9-A4Z6-06  
 TCGA-FS-A1ZZ-06  
 TCGA-FS-A4F0-06  
 TCGA-D9-A1X3-06  
 TCGA-FS-A1ZC-06  
 TCGA-FR-A7U8-06  
 TCGA-D3-ABGI-06  
 TCGA-EE-A3JI-06  
 TCGA-FS-A4F9-06  
 TCGA-GN-A4U7-06  
 TCGA-EE-A2GO-06  
 TCGA-EE-A29D-06  
 TCGA-FS-A1YW-06  
 TCGA-FS-A1ZJ-06  
 TCGA-ER-A2GR-06  
 TCGA-D3-A3ML-06  
 TCGA-W3-A824-06  
 TCGA-RP-A695-06  
 TCGA-D3-ABGK-06  
 TCGA-DA-A95W-06  
 TCGA-EE-A29L-06  
 TCGA-ER-A42K-06  
 TCGA-FW-A3I3-06  
 TCGA-FS-A1EB-06  
 TCGA-EE-A185-06  
 TCGA-EE-A19Z-06  
 TCGA-DA-A95Z-06  
 TCGA-EE-A3AH-06  
 TCGA-YG-AA3P-06  
 TCGA-RP-A690-06  
 TCGA-D3-A1Q1-06  
 TCGA-W3-AAZ1-06  
 TCGA-FS-A1ZK-06  
 TCGA-FS-A1ZY-06  
 TCGA-EE-A29E-06  
 TCGA-EE-A3J8-06  
 TCGA-FS-A1ZU-06  
 TCGA-ER-A3ES-06  
 TCGA-EE-A20H-06  
 TCGA-EE-A3AD-06  
 TCGA-D3-A3C6-06  
 TCGA-D3-A3MO-06  
 TCGA-WE-A8K6-06  
 TCGA-WE-A8ZQ-06  
 TCGA-EE-A2A5-06  
 TCGA-WE-A8ZM-06  
 TCGA-D3-A1O5-06  
 TCGA-GN-A8LL-06  
 TCGA-ER-A19L-06

# TMEM158

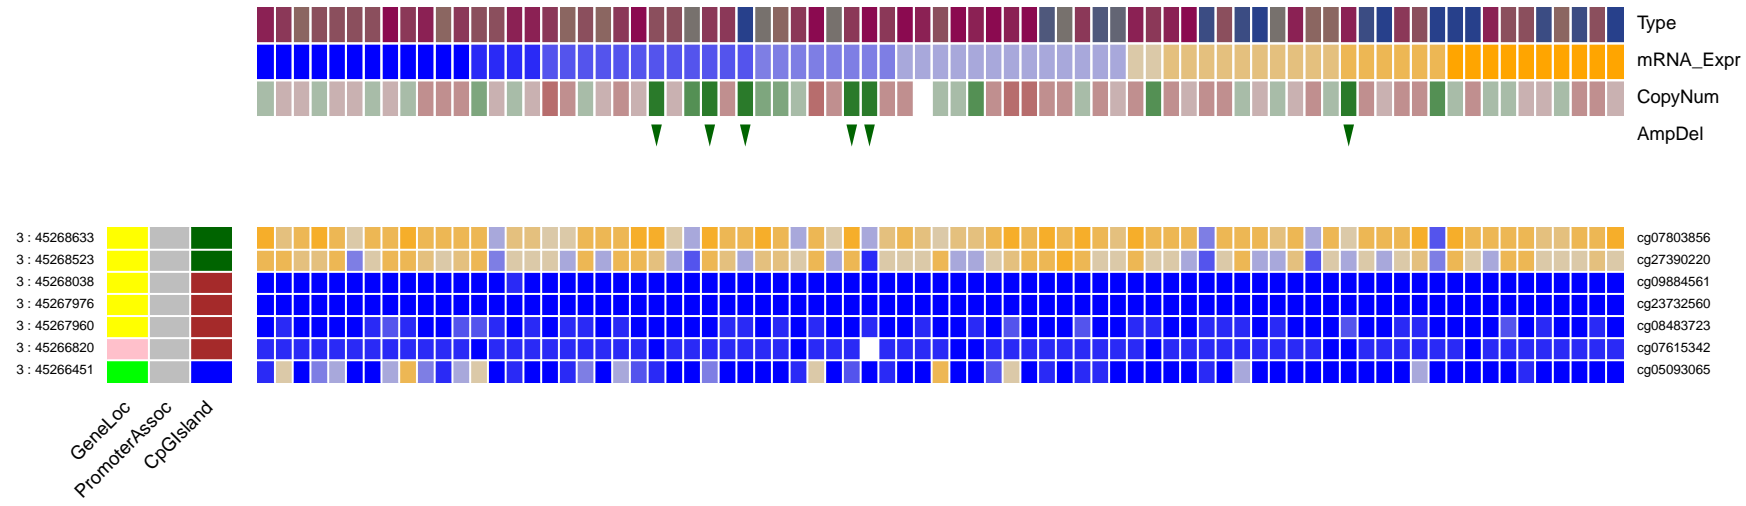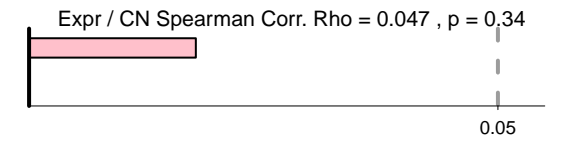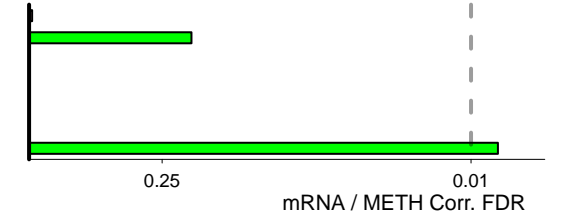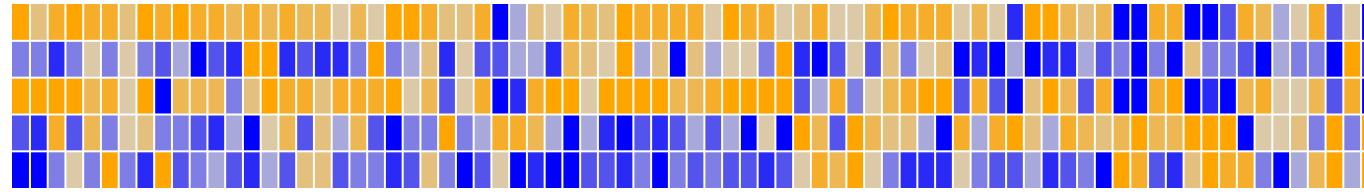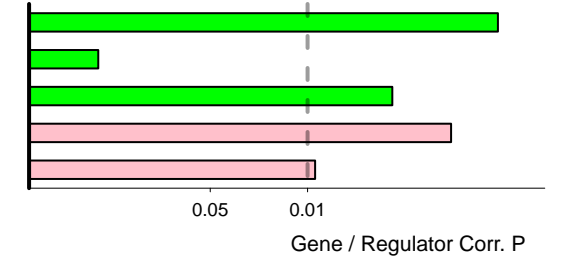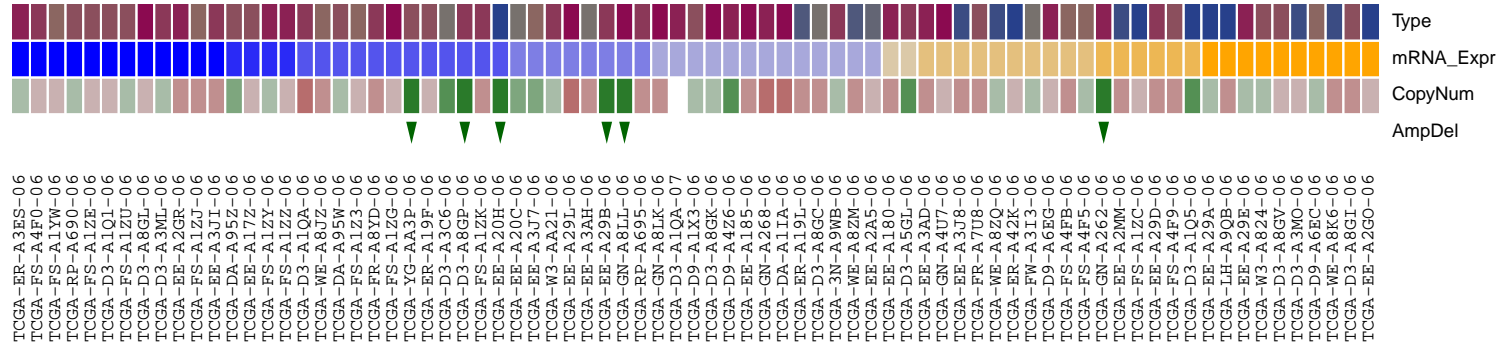

# AFAP1

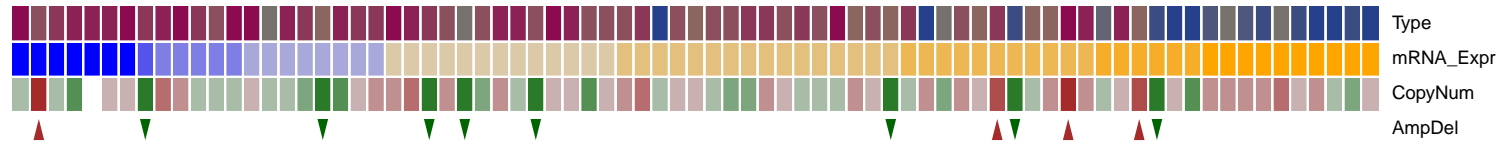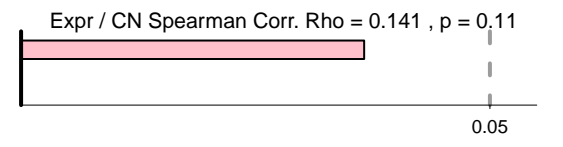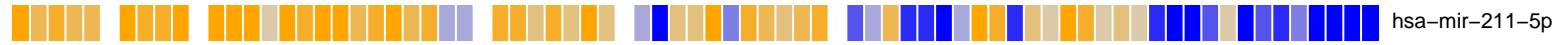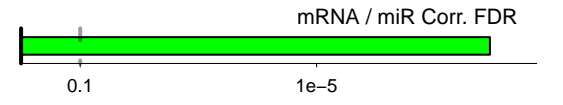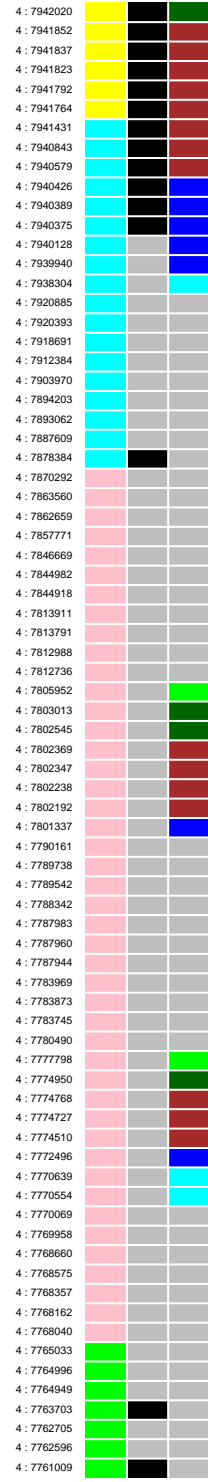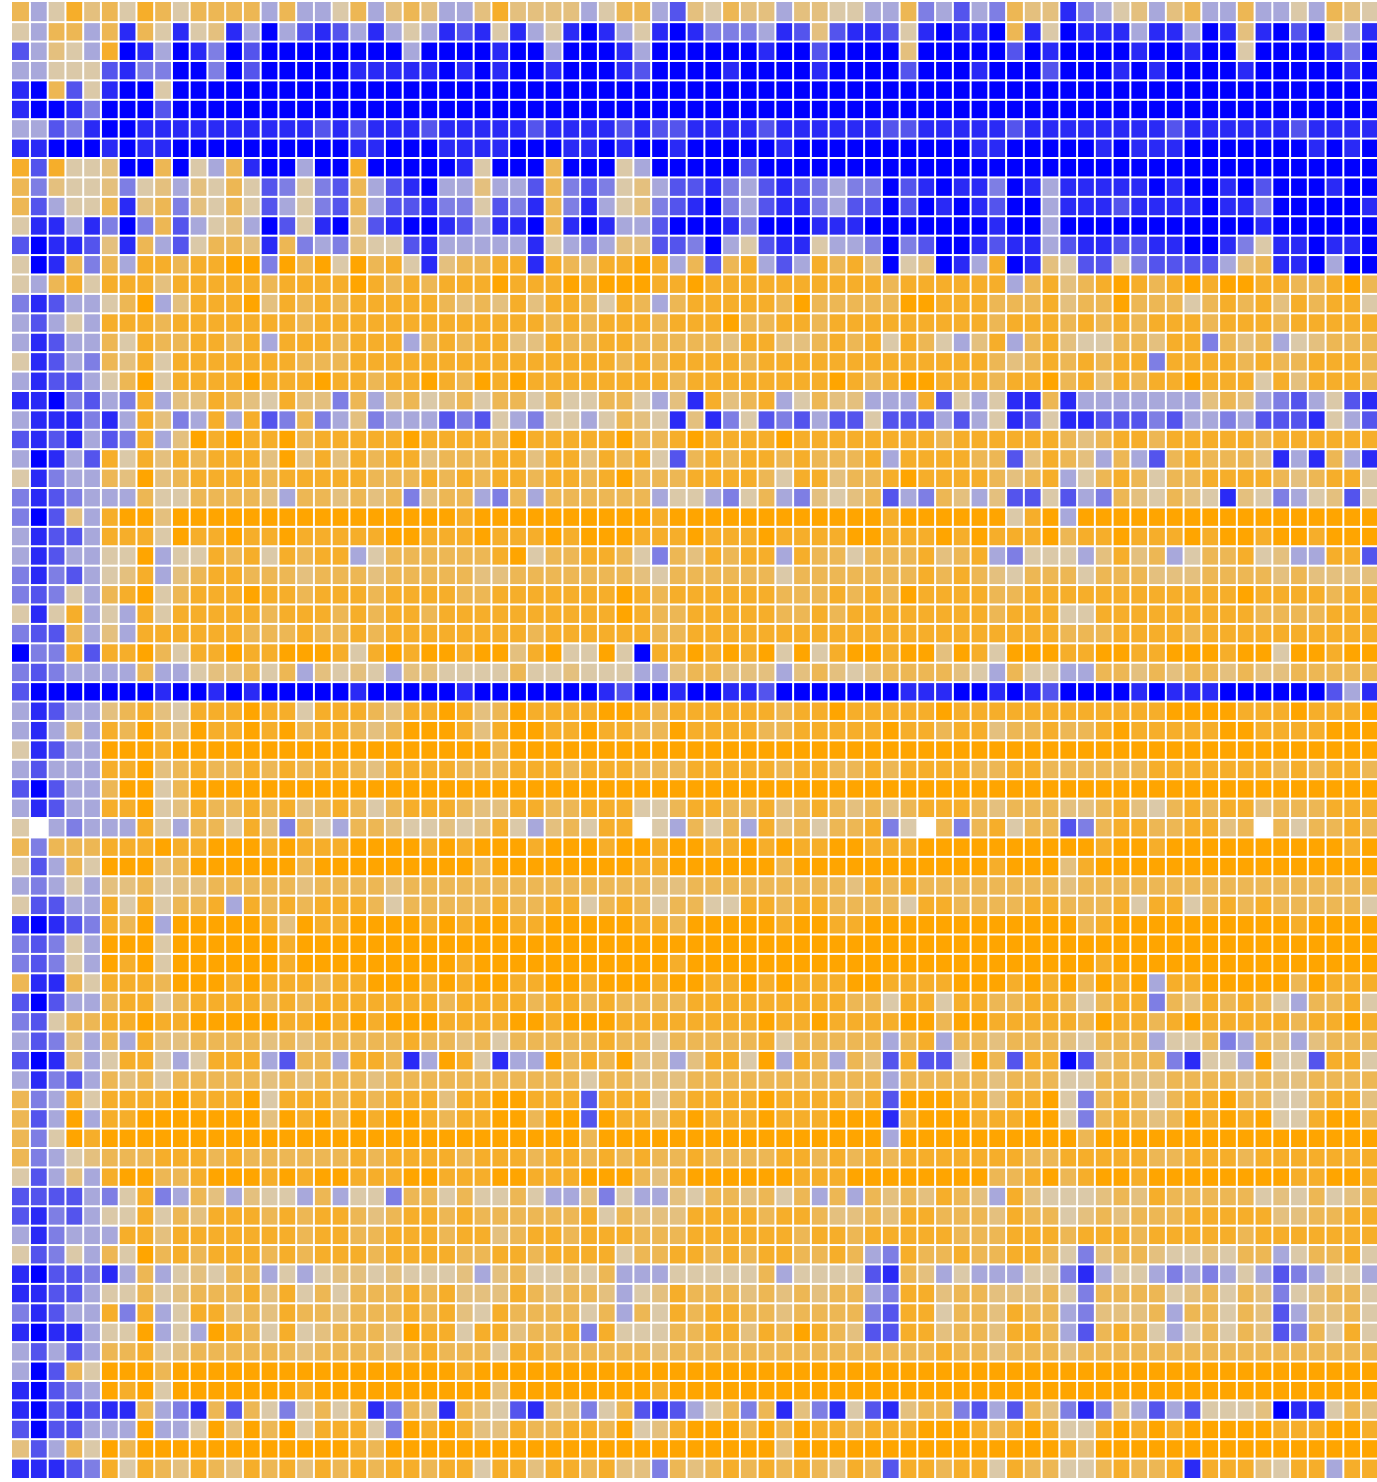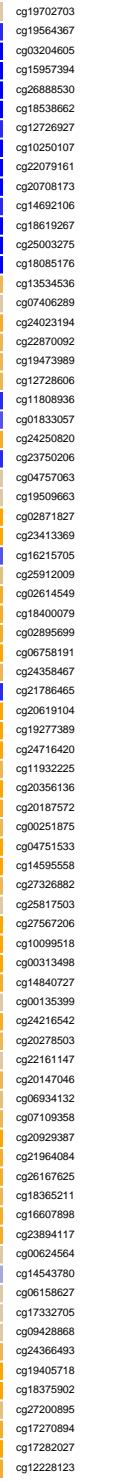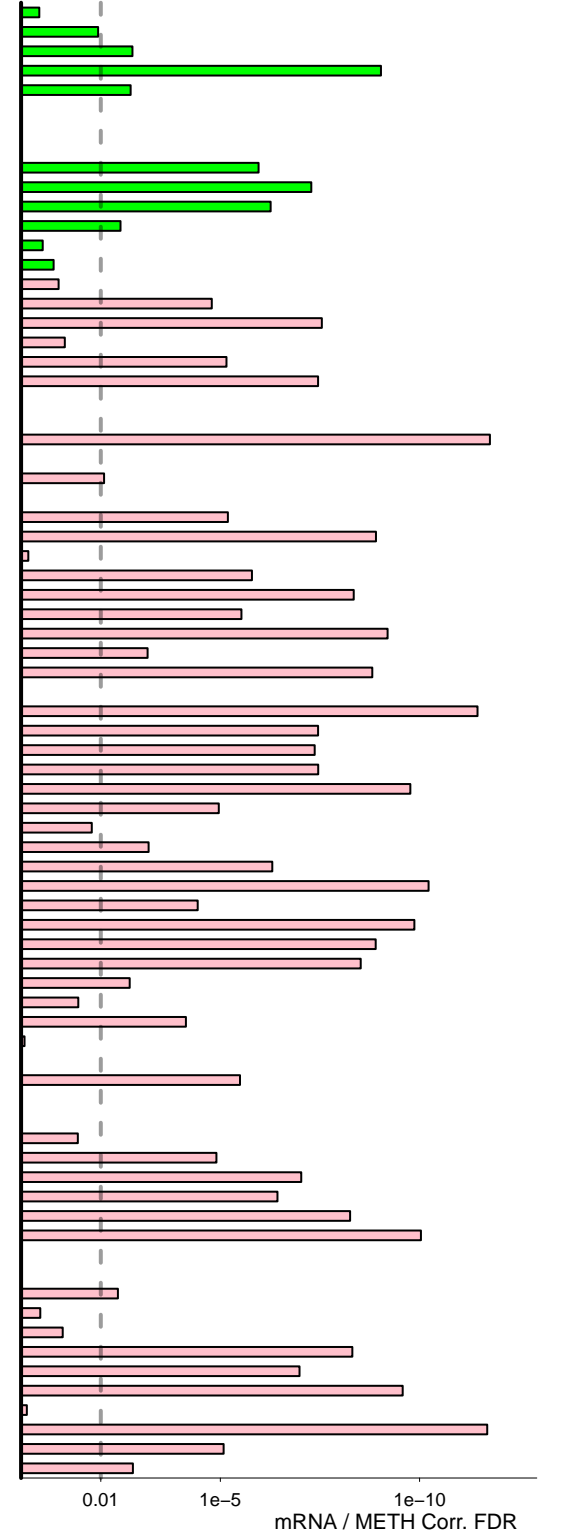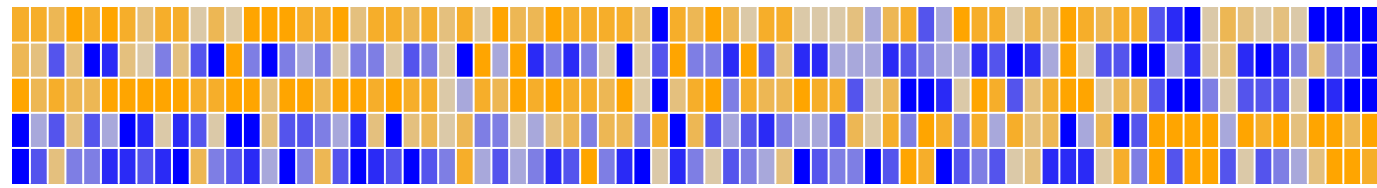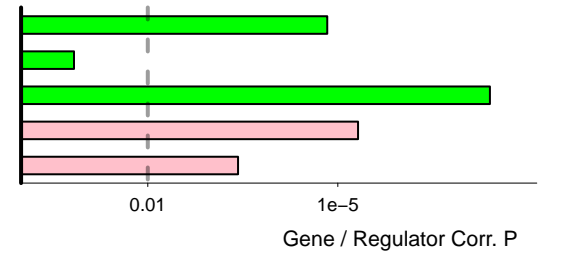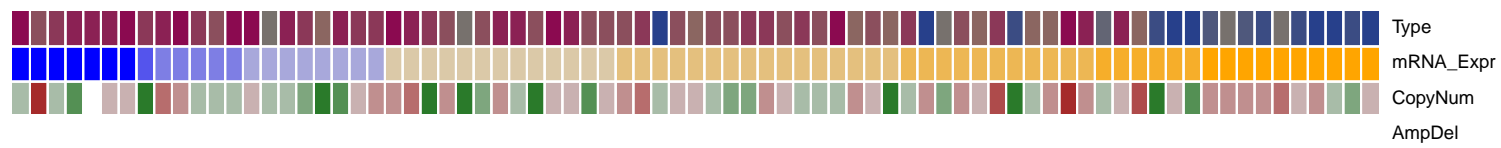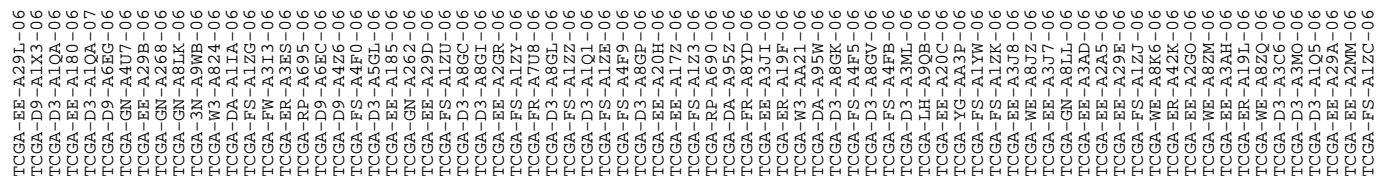

# ITGA2

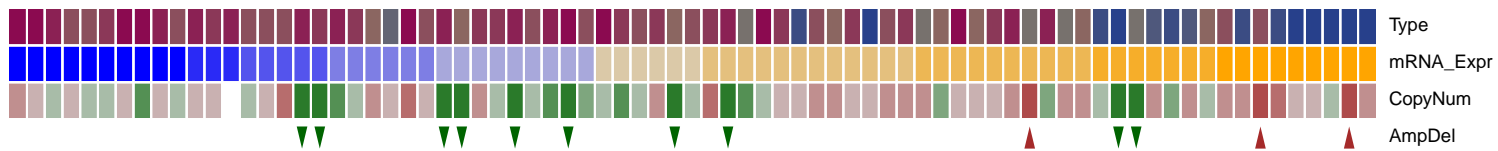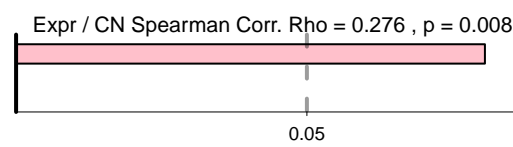

5 : 52283760  
 5 : 52284781  
 5 : 52284785  
 5 : 52284909  
 5 : 52285130  
 5 : 52285176  
 5 : 52285231  
 5 : 52285480  
 5 : 52285560  
 5 : 52319150  
 5 : 52327649  
 5 : 52334107  
 5 : 52386488

GeneLoc  
 PromoterAssoc  
 CpGIsland

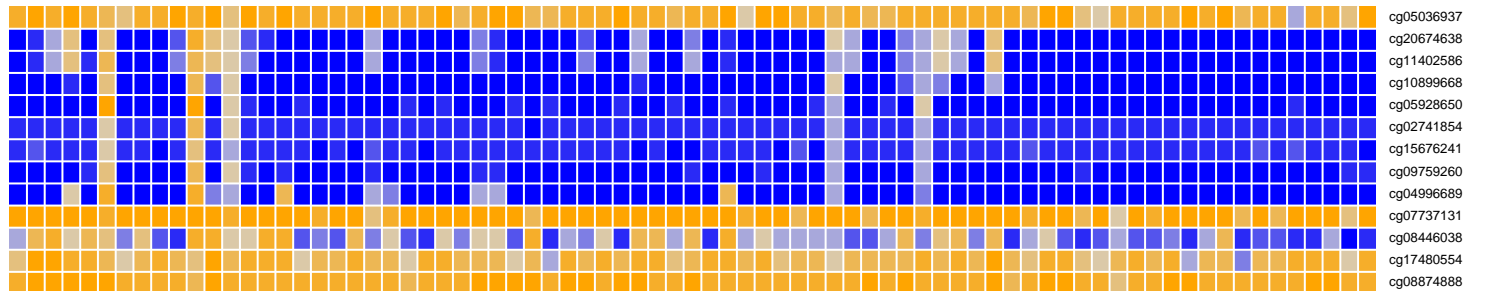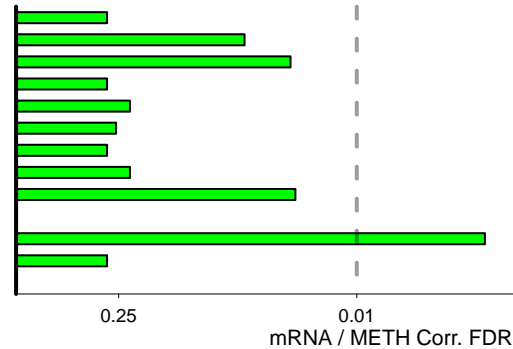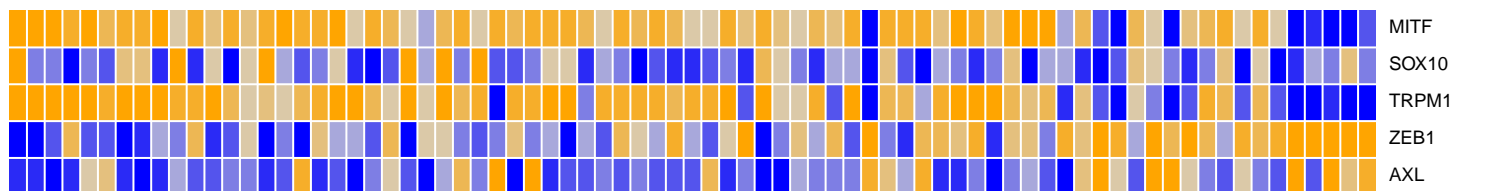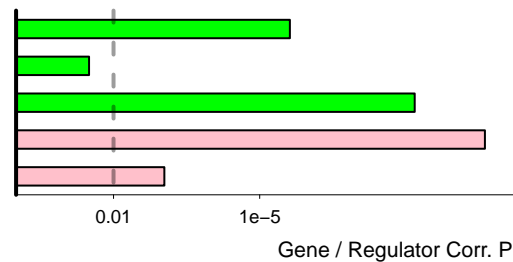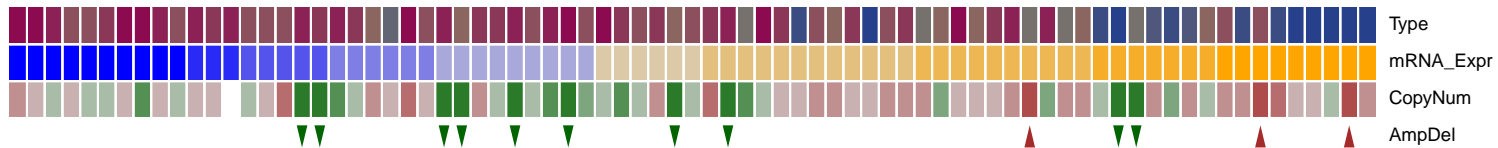

TCGA-GN-A8LL-06  
 TCGA-FS-A1ZG-06  
 TCGA-ER-A3ES-06  
 TCGA-FS-A4F9-06  
 TCGA-RP-A690-06  
 TCGA-D3-A10A-06  
 TCGA-GN-A4U7-06  
 TCGA-GN-A81K-06  
 TCGA-D9-A6EG-06  
 TCGA-D3-A86I-06  
 TCGA-FS-A1ZZ-06  
 TCGA-EE-A29B-06  
 TCGA-D3-A10A-07  
 TCGA-FS-A1ZU-06  
 TCGA-EE-A17Z-06  
 TCGA-YG-A33P-06  
 TCGA-EE-A29E-06  
 TCGA-D3-A52E-06  
 TCGA-D9-A4Z6-06  
 TCGA-W3-AAZ1-06  
 TCGA-FS-A1ZU-06  
 TCGA-EE-A2A5-06  
 TCGA-DA-A1IA-06  
 TCGA-D3-A8GV-06  
 TCGA-FS-A1ZY-06  
 TCGA-FR-A8YD-06  
 TCGA-D9-A6EC-06  
 TCGA-D3-A3ML-06  
 TCGA-GN-A262-06  
 TCGA-D3-A1Q1-06  
 TCGA-EE-A3AD-06  
 TCGA-EE-A185-06  
 TCGA-DA-A95Z-06  
 TCGA-D3-A8GK-06  
 TCGA-EE-A29D-06  
 TCGA-W3-A824-06  
 TCGA-FS-A1ZK-06  
 TCGA-FS-A4FB-06  
 TCGA-DA-A95W-06  
 TCGA-GN-A268-06  
 TCGA-D3-A3C6-06  
 TCGA-EE-A29L-06  
 TCGA-D3-A8GP-06  
 TCGA-PR-A7I8-06  
 TCGA-FS-A4P5-06  
 TCGA-RP-A695-06  
 TCGA-FS-A1ZC-06  
 TCGA-ER-A19F-06  
 TCGA-EE-A3JI-06  
 TCGA-D3-A8GC-06  
 TCGA-EE-A3J7-06  
 TCGA-D3-A8GL-06  
 TCGA-FS-A1YW-06  
 TCGA-FS-A4F0-06  
 TCGA-EE-A180-06  
 TCGA-FW-A3I3-06  
 TCGA-EE-A2GR-06  
 TCGA-EE-A20C-06  
 TCGA-WE-A8JZ-06  
 TCGA-WE-A8K6-06  
 TCGA-EE-A20H-06  
 TCGA-EE-A3AH-06  
 TCGA-WE-A8ZM-06  
 TCGA-EE-A2MM-06  
 TCGA-ER-A19L-06  
 TCGA-FS-A1Z3-06  
 TCGA-D9-A1X3-06  
 TCGA-EE-A3J8-06  
 TCGA-FS-A1ZE-06  
 TCGA-WE-A8ZQ-06  
 TCGA-EE-A2G0-06  
 TCGA-ER-A42K-06  
 TCGA-EE-A29A-06  
 TCGA-D3-A105-06  
 TCGA-LH-A9QB-06

# AKR1C3

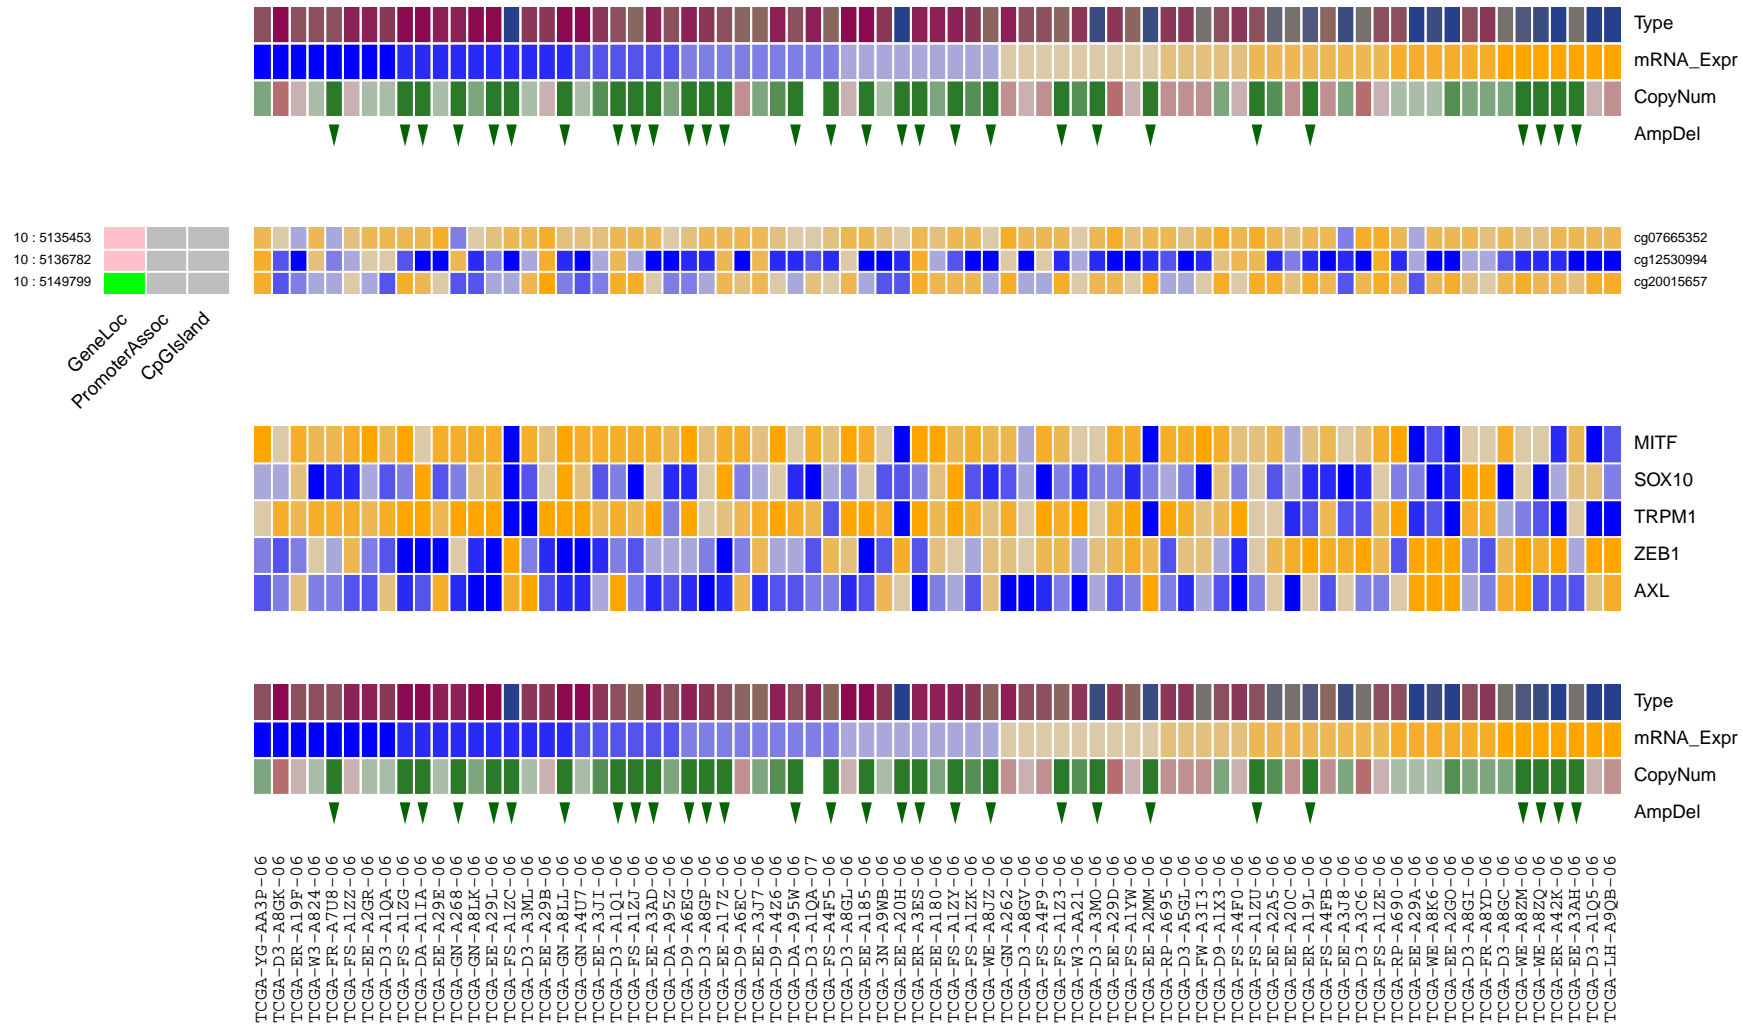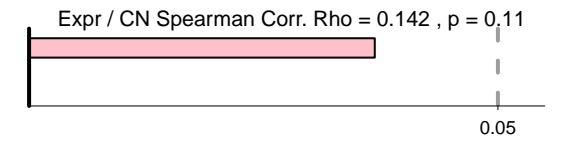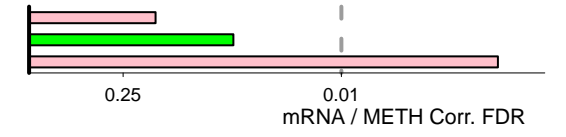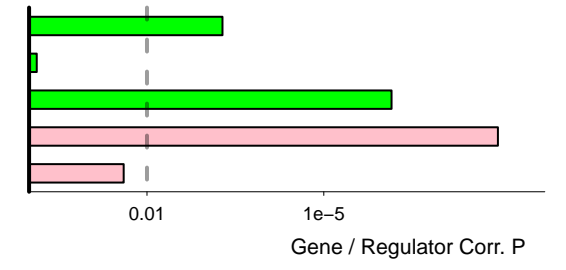



# ARL4C

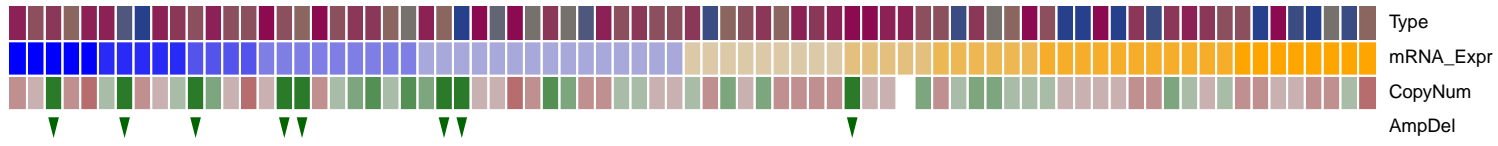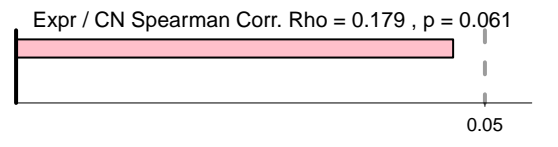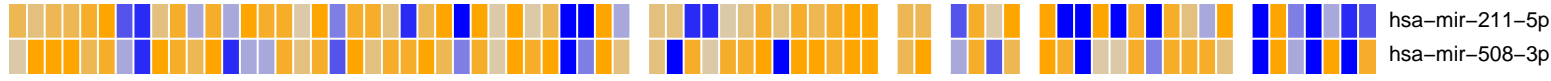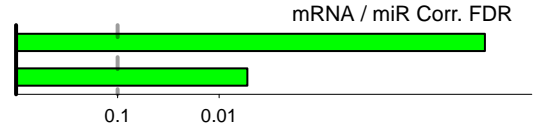

2 : 235407153  
2 : 235406902  
2 : 235406891  
2 : 235406874  
2 : 235406540  
2 : 235406363  
2 : 235406291  
2 : 235406275  
2 : 235405968  
2 : 235405480  
2 : 235405243  
2 : 235405122  
2 : 235404686  
2 : 235403218  
2 : 235403141  
2 : 235401950

GeneLoc  
PromoterAssoc  
CpGIsland

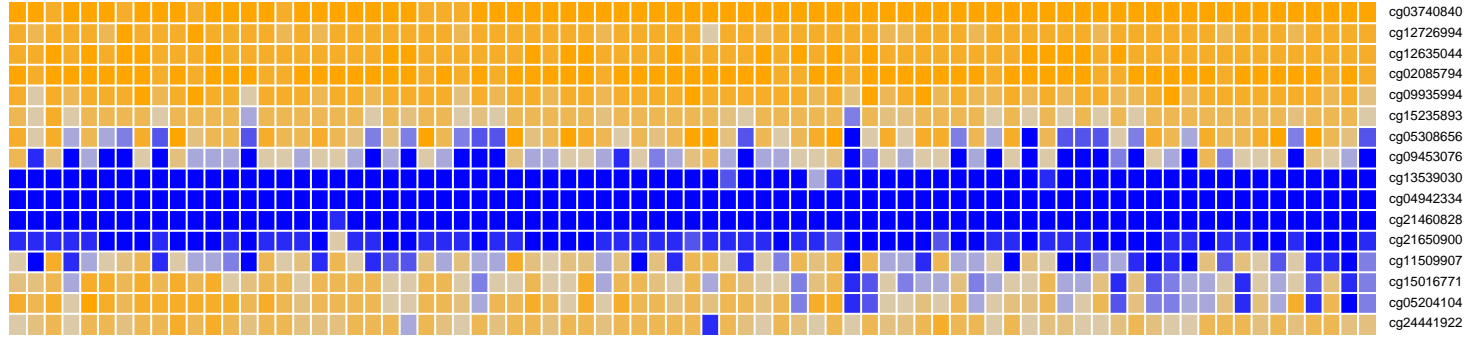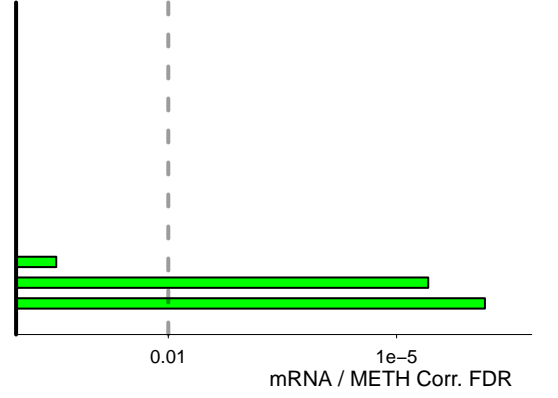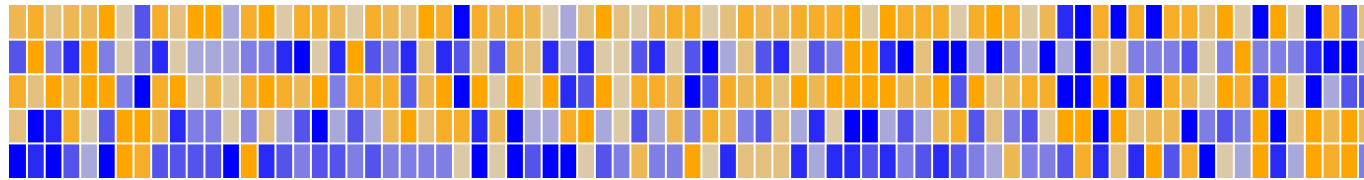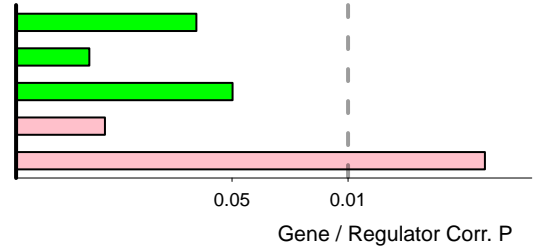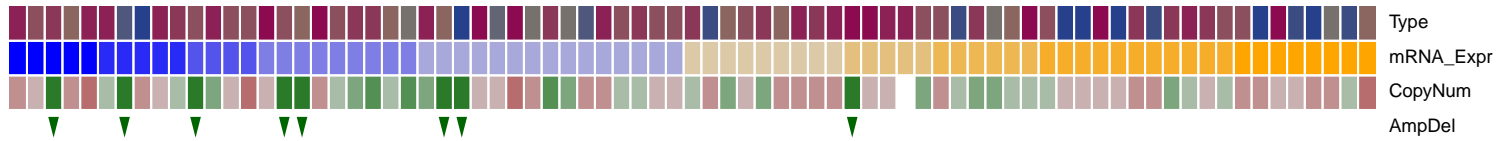

TCGA-GN-A262-06  
TCGA-EE-A172-06  
TCGA-FS-A4F0-06  
TCGA-FS-A4FB-06  
TCGA-FS-A1ZY-06  
TCGA-ER-A3ES-06  
TCGA-WE-A8ZM-06  
TCGA-LH-A9OB-06  
TCGA-FS-A1Z2-06  
TCGA-EE-A29B-06  
TCGA-YG-AA3P-06  
TCGA-EE-A2GR-06  
TCGA-D3-A8GV-06  
TCGA-D3-A8GI-06  
TCGA-DA-A9SW-06  
TCGA-FS-A1Z1-06  
TCGA-EE-A1G5-06  
TCGA-DA-A95Z-06  
TCGA-FR-A81D-06  
TCGA-FS-A1ZK-06  
TCGA-FS-A1Z3-06  
TCGA-D3-A3C6-06  
TCGA-EE-A180-06  
TCGA-FS-A1YW-06  
TCGA-EE-A20H-06  
TCGA-GN-A8LK-06  
TCGA-EE-A2A5-06  
TCGA-EE-A29L-06  
TCGA-EE-A3AH-06  
TCGA-W3-AA21-06  
TCGA-EE-A20C-06  
TCGA-ER-A19L-06  
TCGA-D9-A4Z6-06  
TCGA-FS-A1ZU-06  
TCGA-3N-A9WB-06  
TCGA-FR-A7U8-06  
TCGA-FS-A1ZE-06  
TCGA-D3-A3ML-06  
TCGA-EE-A3J7-06  
TCGA-ER-A19F-06  
TCGA-D3-A1OA-06  
TCGA-WE-A8JZ-06  
TCGA-EE-A3AD-06  
TCGA-EE-A3J1-06  
TCGA-GN-A268-06  
TCGA-GN-A8Y1-06  
TCGA-DA-A1JA-06  
TCGA-D3-A1G8-06  
TCGA-D3-A1G9-07  
TCGA-FS-A1Z3-06  
TCGA-FS-A4F9-06  
TCGA-WE-A8CQ-06  
TCGA-RP-A695-06  
TCGA-FW-A3I3-06  
TCGA-D9-A6EC-06  
TCGA-D3-A8GK-06  
TCGA-W3-A824-06  
TCGA-ER-A42K-06  
TCGA-FS-A1ZC-06  
TCGA-GN-A4U7-06  
TCGA-D3-A1Q5-06  
TCGA-D3-A5GL-06  
TCGA-EE-A2MM-06  
TCGA-EE-A29E-06  
TCGA-EE-A29D-06  
TCGA-D3-A8GP-06  
TCGA-RP-A690-06  
TCGA-D3-A8GI-06  
TCGA-EE-A29A-06  
TCGA-FS-A1ZG-06  
TCGA-D3-A3MO-06  
TCGA-EE-A2GO-06  
TCGA-D3-A8GC-06  
TCGA-WE-A8K6-06  
TCGA-FS-A4F5-06

# HRH1

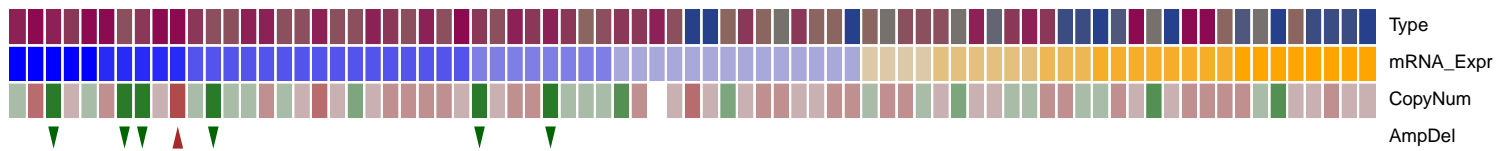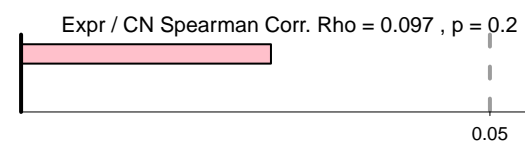

3 : 11178064  
3 : 11178593  
3 : 11178652  
3 : 11178683  
3 : 11178745  
3 : 11178758  
3 : 11178798  
3 : 11192067  
3 : 11195317  
3 : 11195751  
3 : 11195902  
3 : 11196445  
3 : 11196695  
3 : 11203475  
3 : 11211081  
3 : 11241399  
3 : 11242797  
3 : 11267020  
3 : 11267072  
3 : 11267098  
3 : 11267525  
3 : 11278749  
3 : 11299312  
3 : 11302179  
3 : 11302249

GeneLoc  
PromoterAssoc  
CpGIsland

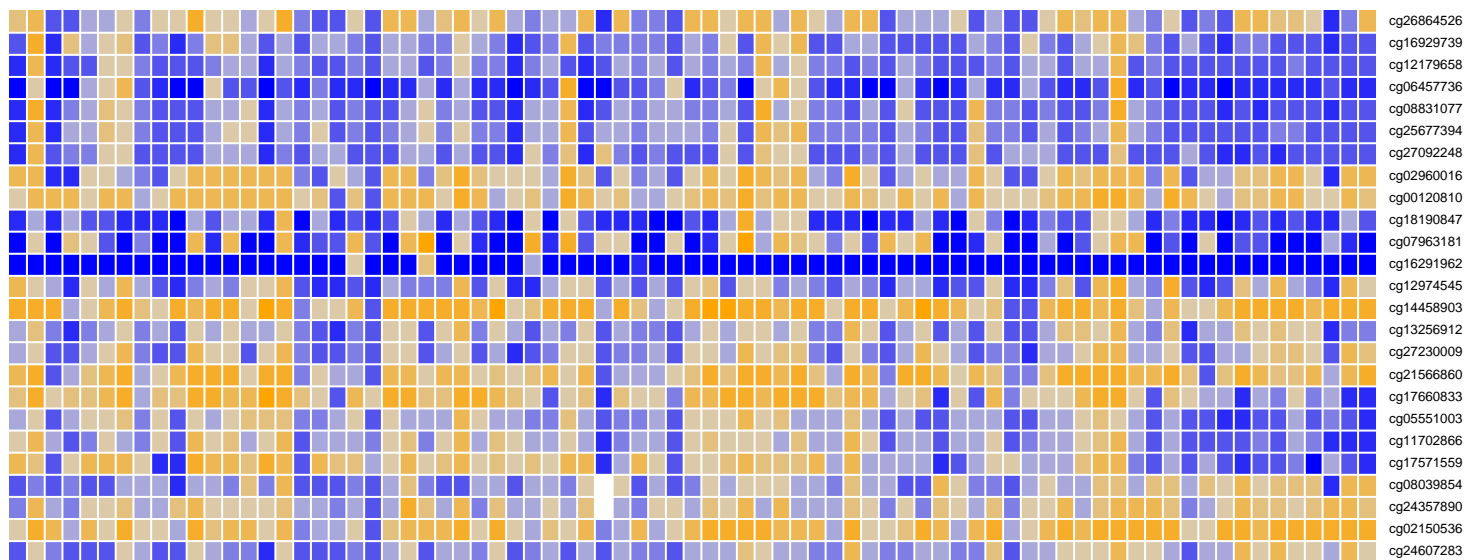

cg26864526  
cg16929739  
cg12179658  
cg06457736  
cg08831077  
cg25677394  
cg27092248  
cg02960016  
cg00120810  
cg18190847  
cg07963181  
cg16291962  
cg12974545  
cg14458903  
cg13256912  
cg27230009  
cg21566860  
cg17660833  
cg05551003  
cg11702866  
cg17571559  
cg08039854  
cg24357890  
cg02150536  
cg24607283

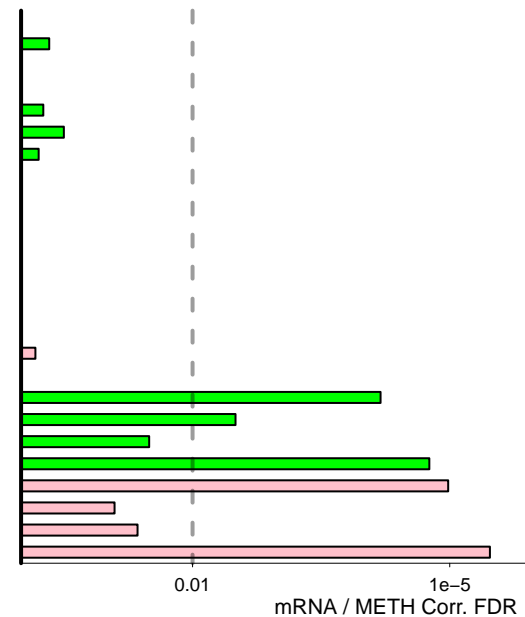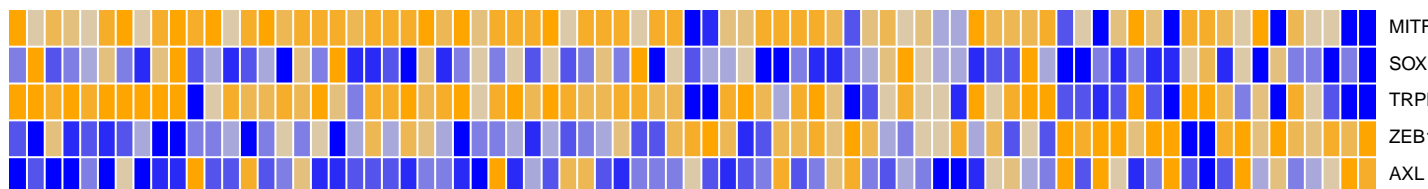

MITF  
SOX10  
TRPM1  
ZEB1  
AXL

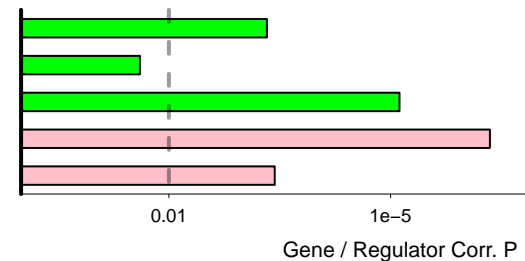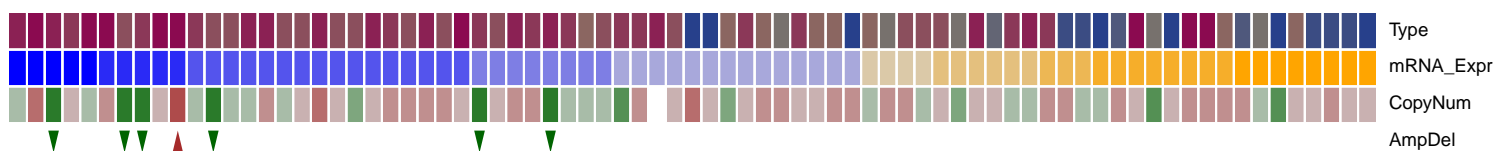

TCGA-ER-A3ES-06  
TCGA-DA-ALIA-06  
TCGA-GN-A262-06  
TCGA-FS-A4F0-06  
TCGA-D3-A8K-06  
TCGA-GN-A8LK-06  
TCGA-RP-A690-06  
TCGA-W3-AA21-06  
TCGA-GN-A4U7-06  
TCGA-GN-A8LL-06  
TCGA-D3-A3ML-06  
TCGA-YG-AA3P-06  
TCGA-DA-A95W-06  
TCGA-EE-A29E-06  
TCGA-EE-A2GR-06  
TCGA-W3-A824-06  
TCGA-ER-A19F-06  
TCGA-GN-A258-06  
TCGA-EE-AL7Z-06  
TCGA-DA-A95Z-06  
TCGA-FS-A1ZZ-06  
TCGA-FS-A1ZK-06  
TCGA-FS-A4F9-06  
TCGA-EE-A180-06  
TCGA-FR-A7U8-06  
TCGA-FS-A1ZG-06  
TCGA-D3-A8GP-06  
TCGA-D3-A1Q1-06  
TCGA-EE-A3AD-06  
TCGA-EE-A3JI-06  
TCGA-D9-A4Z6-06  
TCGA-3N-A9WB-06  
TCGA-D9-A6EC-06  
TCGA-D9-A1X3-06  
TCGA-D3-A5GL-06  
TCGA-FR-A8YD-06  
TCGA-D3-A1QA-07  
TCGA-FS-A1ZE-06  
TCGA-EE-A20H-06  
TCGA-ER-A42K-06  
TCGA-EE-A3J7-06  
TCGA-EE-A29B-06  
TCGA-FS-A1ZJ-06  
TCGA-D3-A8GC-06  
TCGA-EE-A29D-06  
TCGA-FS-A1YW-06  
TCGA-FS-A8TZ-06  
TCGA-LH-A9QB-06  
TCGA-FS-A4F5-06  
TCGA-ER-A3AH-06  
TCGA-D3-A6CH-06  
TCGA-FS-A1ZU-06  
TCGA-D3-A6GV-06  
TCGA-EE-A20C-06  
TCGA-D9-A6EG-06  
TCGA-EE-A2A5-06  
TCGA-FS-A1QA-06  
TCGA-FS-A1ZY-06  
TCGA-RP-A695-06  
TCGA-WE-A8K6-06  
TCGA-WE-A8ZQ-06  
TCGA-EE-A29A-06  
TCGA-ER-A19L-06  
TCGA-D3-A8GL-06  
TCGA-D3-A3C6-06  
TCGA-EE-A2G0-06  
TCGA-EE-A185-06  
TCGA-EE-A29L-06  
TCGA-FS-A4FB-06  
TCGA-WE-A8ZM-06  
TCGA-FW-A3I3-06  
TCGA-D3-A1O5-06  
TCGA-FS-A1Z3-06  
TCGA-D3-A3M0-06  
TCGA-EE-A3J8-06  
TCGA-EE-A2MM-06  
TCGA-FS-A1ZC-06

# CLU

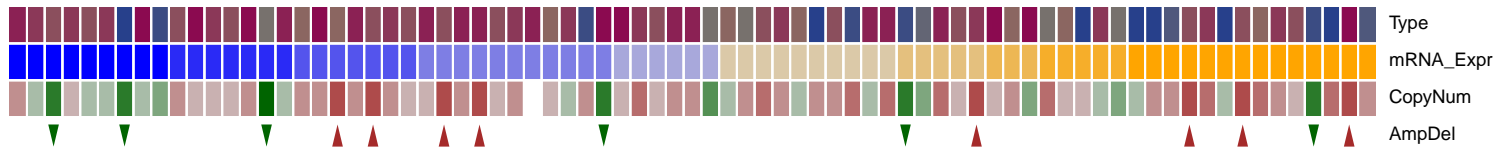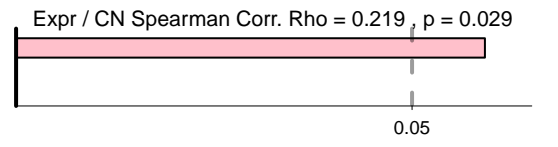

8 : 27473467  
 8 : 27473422  
 8 : 27472513  
 8 : 27472457  
 8 : 27472454  
 8 : 27472446  
 8 : 27472395  
 8 : 27472385  
 8 : 27472374  
 8 : 27472321  
 8 : 27472319  
 8 : 27472259  
 8 : 27472239  
 8 : 27470629  
 8 : 27470575  
 8 : 27470225  
 8 : 27469338  
 8 : 27469331  
 8 : 27469186  
 8 : 27469001  
 8 : 27468981  
 8 : 27468684  
 8 : 27467783  
 8 : 27462723  
 8 : 27462513  
 8 : 27461876  
 8 : 27461800  
 8 : 27461199  
 8 : 27457461  
 8 : 27457282  
 8 : 27455004

GeneLoc  
 PromoterAssoc  
 CpGIsland

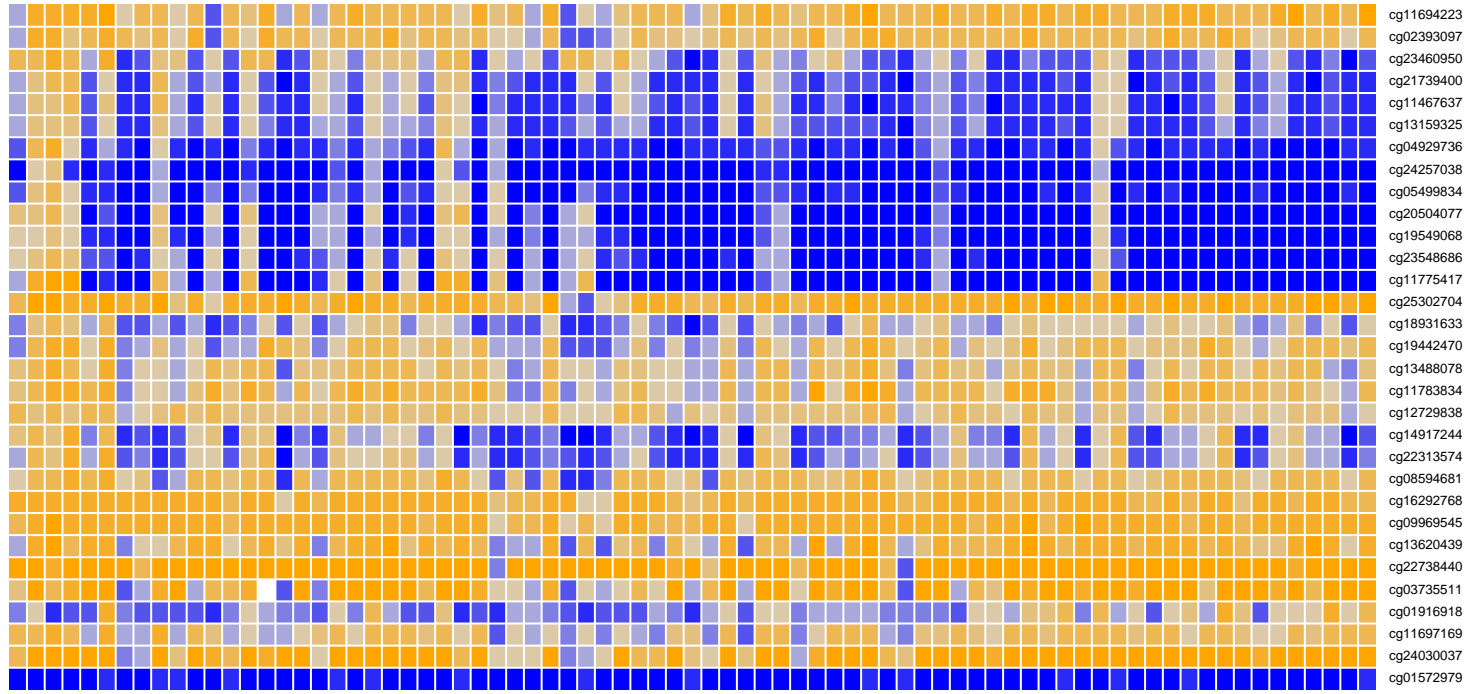

cg11694223  
 cg02393097  
 cg23460950  
 cg21739400  
 cg11467637  
 cg13159325  
 cg04929736  
 cg24257038  
 cg05499834  
 cg20504077  
 cg19549068  
 cg23548686  
 cg11775417  
 cg25302704  
 cg18931633  
 cg19442470  
 cg13488078  
 cg11783834  
 cg12729838  
 cg14917244  
 cg22313574  
 cg08594681  
 cg16292768  
 cg09969545  
 cg13620439  
 cg22738440  
 cg03735511  
 cg01916918  
 cg11697169  
 cg24030037  
 cg01572979

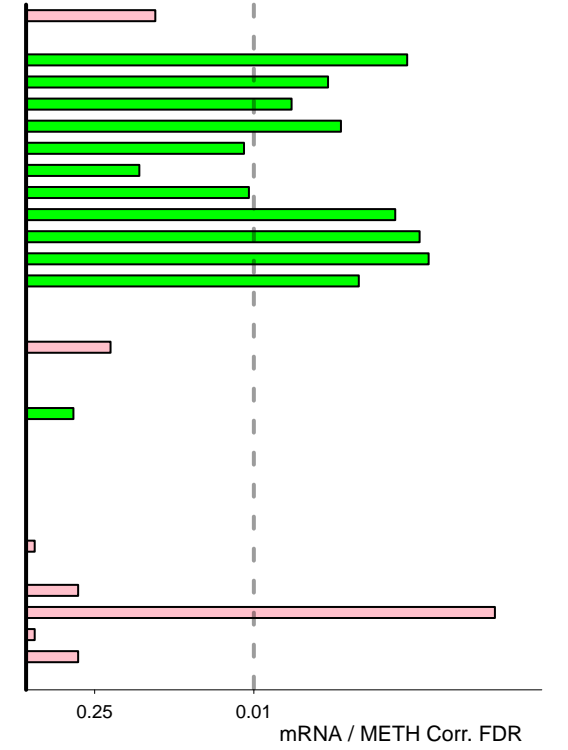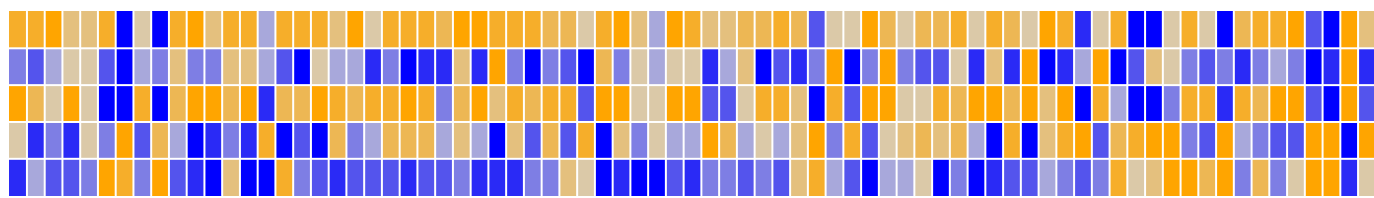

MITF  
 SOX10  
 TRPM1  
 ZEB1  
 AXL

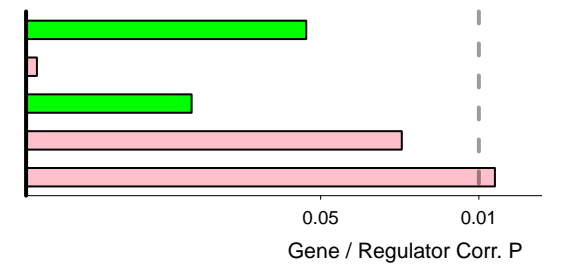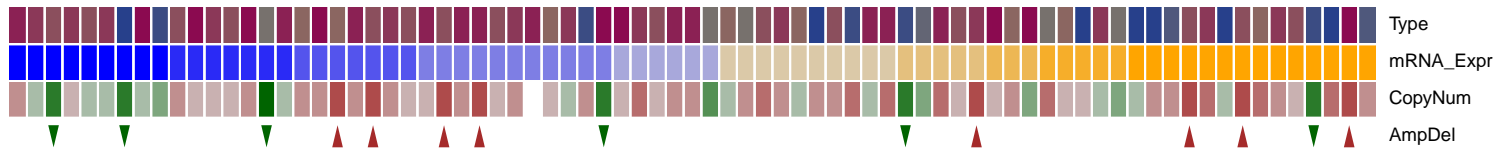

TCGA-GN-A268-06  
 TCGA-EE-A3J1-06  
 TCGA-YG-AA3P-06  
 TCGA-EE-A29B-06  
 TCGA-FS-A1ZU-06  
 TCGA-D3-A3ML-06  
 TCGA-FS-A1ZC-06  
 TCGA-D3-A8GK-06  
 TCGA-EE-A2MM-06  
 TCGA-D9-A1X3-06  
 TCGA-FS-A1ZG-06  
 TCGA-FS-A4F0-06  
 TCGA-ER-A19F-06  
 TCGA-GN-A8LK-06  
 TCGA-EE-A20C-06  
 TCGA-EE-A29E-06  
 TCGA-FS-A1ZJ-06  
 TCGA-EE-A185-06  
 TCGA-EE-A5J7-06  
 TCGA-EE-A2GR-06  
 TCGA-DA-A95W-06  
 TCGA-EE-A29D-06  
 TCGA-FS-A4F9-06  
 TCGA-FS-A1Z2-06  
 TCGA-DA-A95Z-06  
 TCGA-EE-A180-06  
 TCGA-D9-A6EG-06  
 TCGA-EE-A17Z-06  
 TCGA-D3-A5GL-06  
 TCGA-D3-A1QA-07  
 TCGA-FS-A1Z3-06  
 TCGA-D3-A1QA-06  
 TCGA-EE-A29L-06  
 TCGA-EE-A29L-06  
 TCGA-D3-A8GP-06  
 TCGA-D3-A8GV-06  
 TCGA-D9-A4Z6-06  
 TCGA-EE-A3AD-06  
 TCGA-D3-A3C6-06  
 TCGA-FS-A4F5-06  
 TCGA-EE-A3AH-06  
 TCGA-W3-A824-06  
 TCGA-FS-A1ZK-06  
 TCGA-WE-A8TZ-06  
 TCGA-LH-A9OB-06  
 TCGA-D3-A8GI-06  
 TCGA-ER-A8ZO-06  
 TCGA-WE-A3FS-06  
 TCGA-FS-A1ZY-06  
 TCGA-D3-A3MO-06  
 TCGA-EE-A2A5-06  
 TCGA-GN-A292-06  
 TCGA-FS-A1ZE-06  
 TCGA-W3-AAZ1-06  
 TCGA-GN-A4U7-06  
 TCGA-FS-A4FB-06  
 TCGA-DA-A1IA-06  
 TCGA-FW-A3I3-06  
 TCGA-FS-A1YW-06  
 TCGA-ER-A4ZK-06  
 TCGA-FR-A8YD-06  
 TCGA-D3-A8GC-06  
 TCGA-EE-A20H-06  
 TCGA-WE-A8ZM-06  
 TCGA-D3-A1Q1-06  
 TCGA-3N-A9WB-06  
 TCGA-FR-A7U8-06  
 TCGA-EE-A29A-06  
 TCGA-D9-A6EC-06  
 TCGA-RP-A695-06  
 TCGA-RP-A690-06  
 TCGA-WE-A8K6-06  
 TCGA-EE-A2GO-06  
 TCGA-GN-A8LL-06  
 TCGA-ER-A19L-06

# ADAMTS6

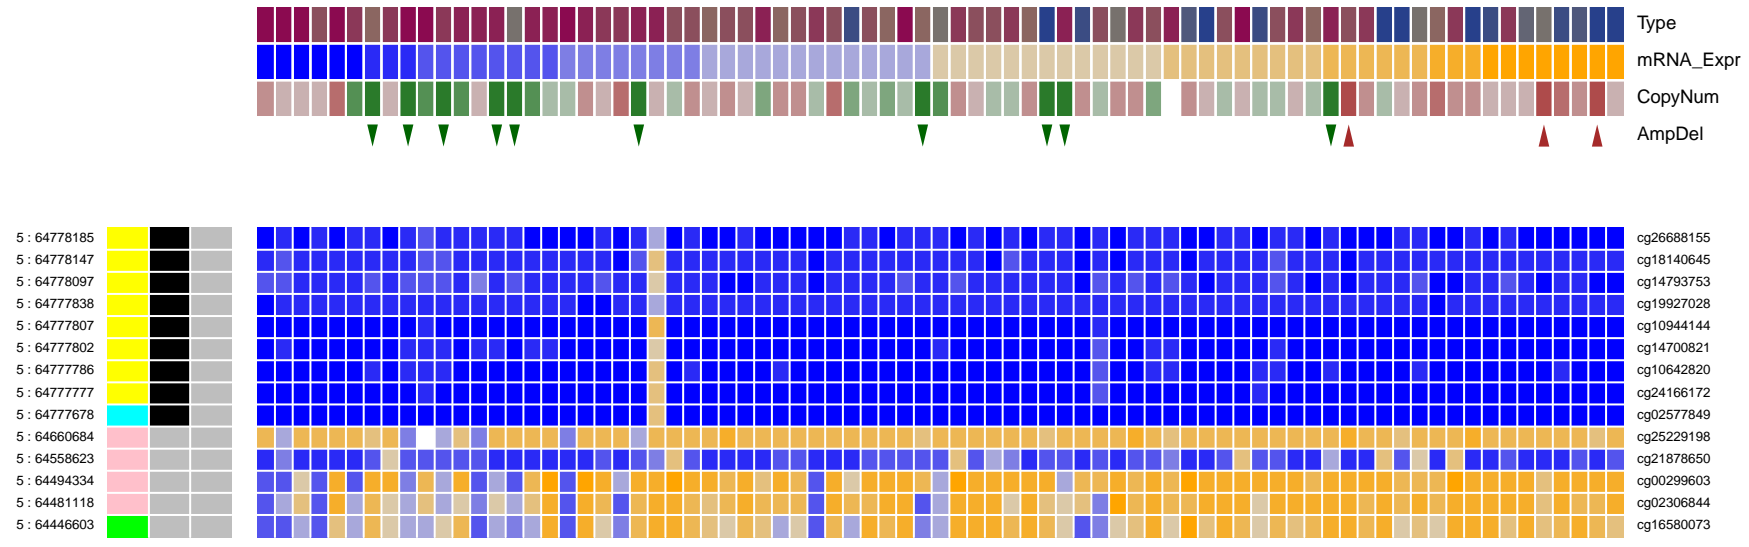

GeneLoc  
PromoterAssoc  
CpGIsland

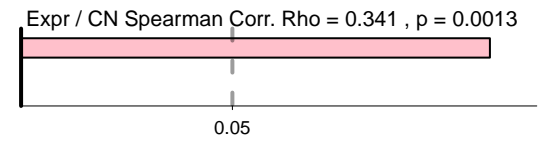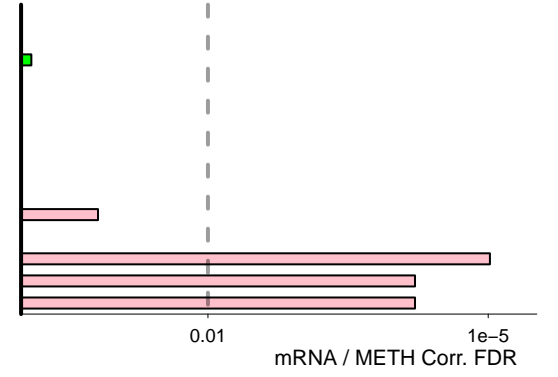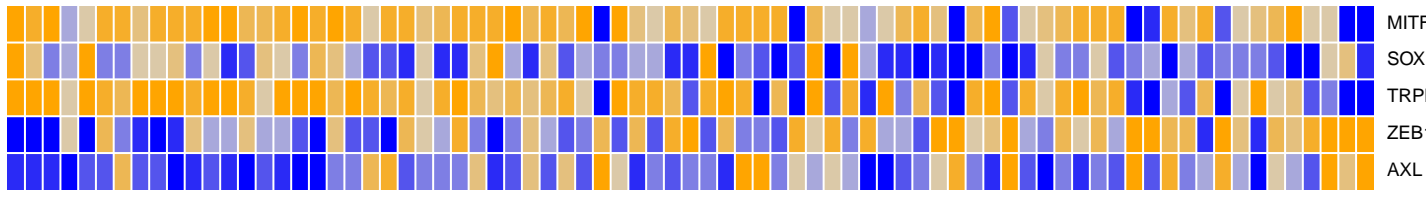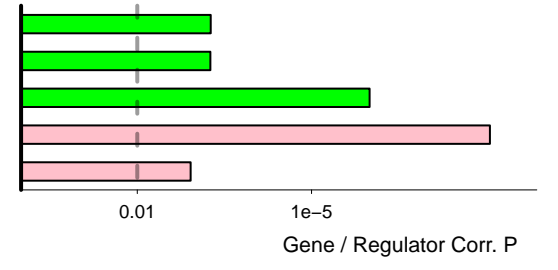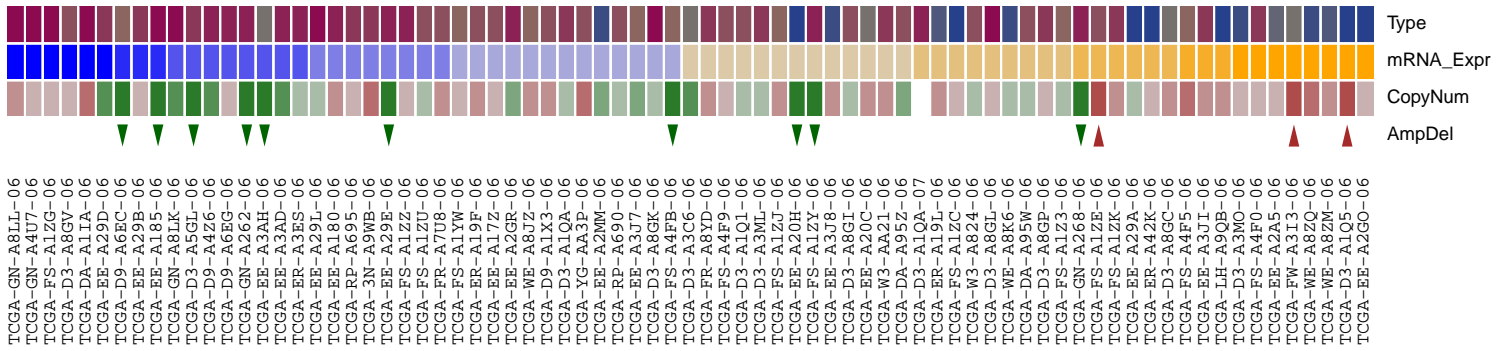

# ABCC3

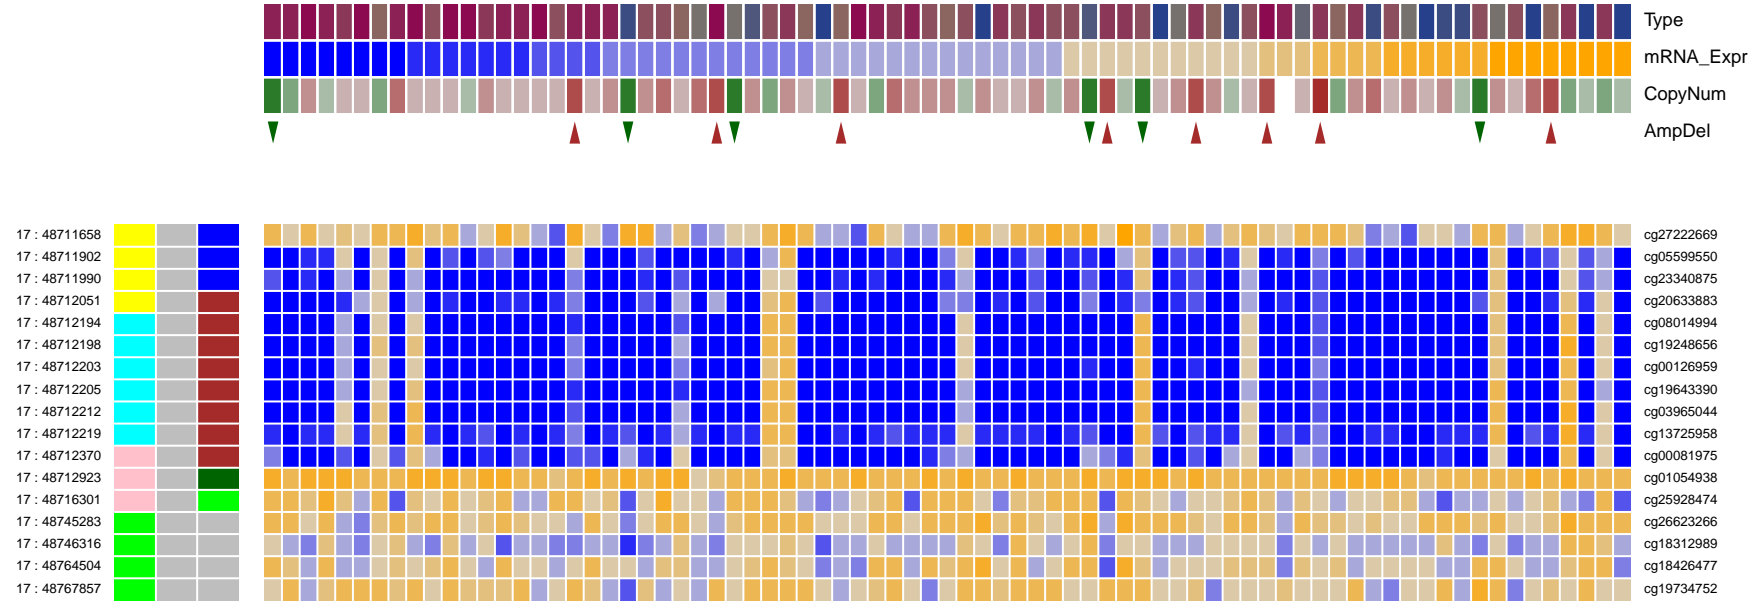

GeneLoc  
PromoterAssoc  
CpGIsland

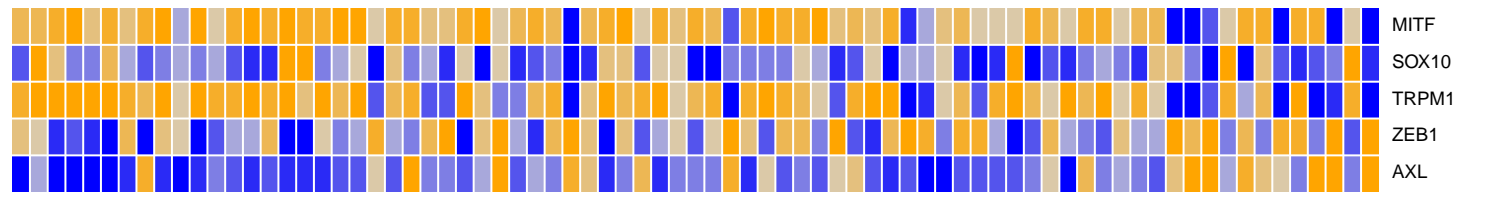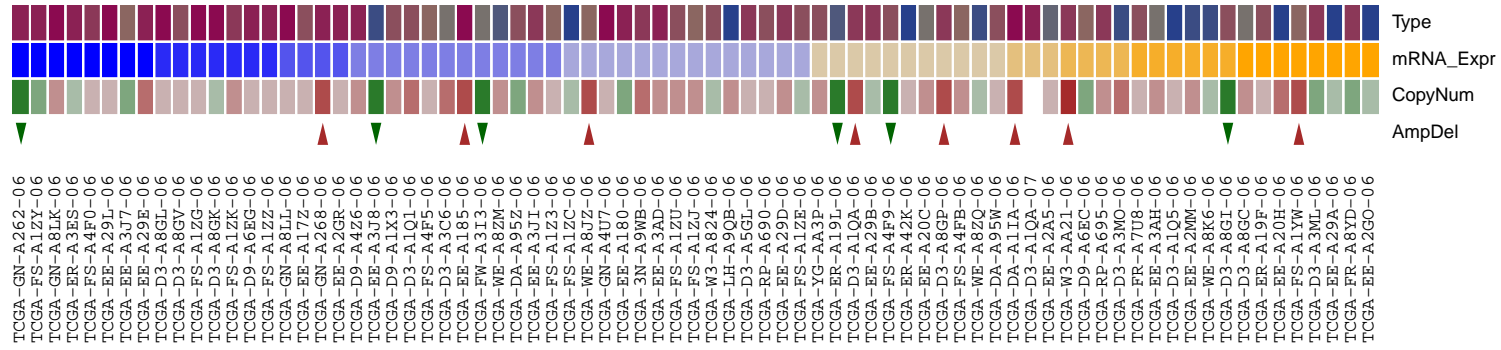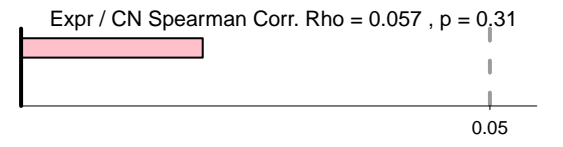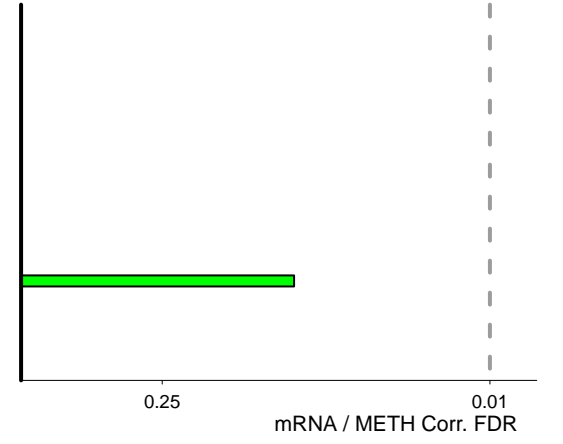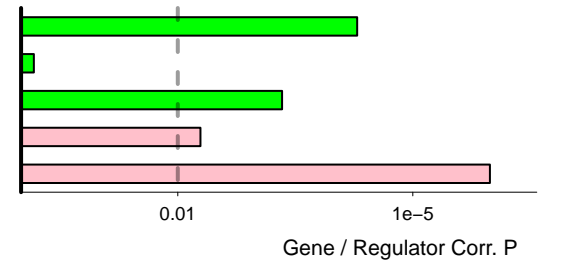

# CSF1

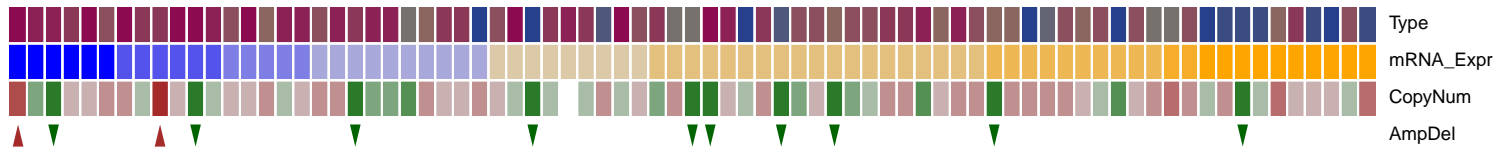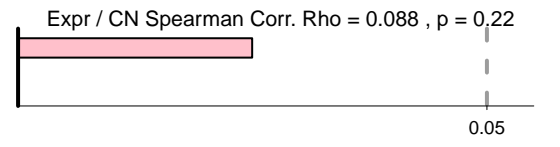

1: 110452372  
 1: 110452482  
 1: 110452616  
 1: 110453002  
 1: 110453107  
 1: 110453144  
 1: 110453477  
 1: 110453888  
 1: 110453914  
 1: 110454063  
 1: 110457683  
 1: 110471519  
 1: 110472997

GeneLoc  
 PromoterAssoc  
 CpGIsland

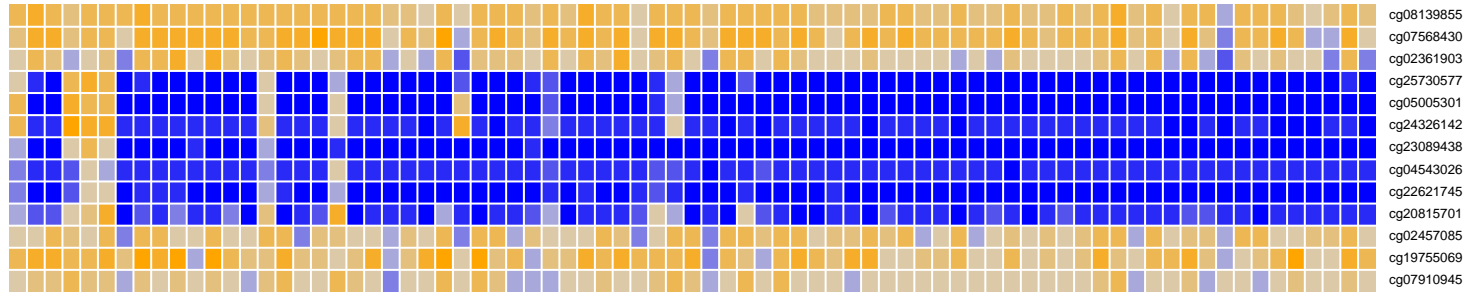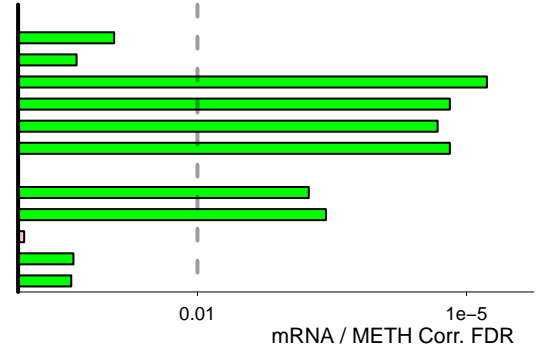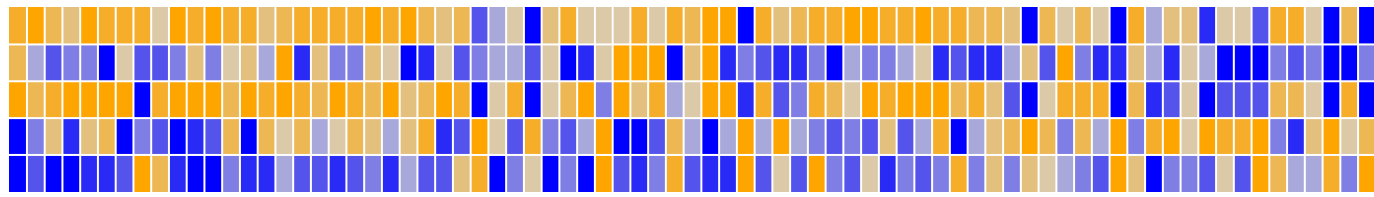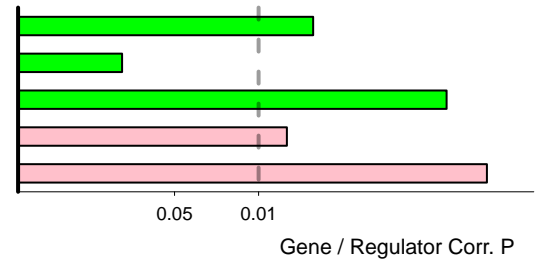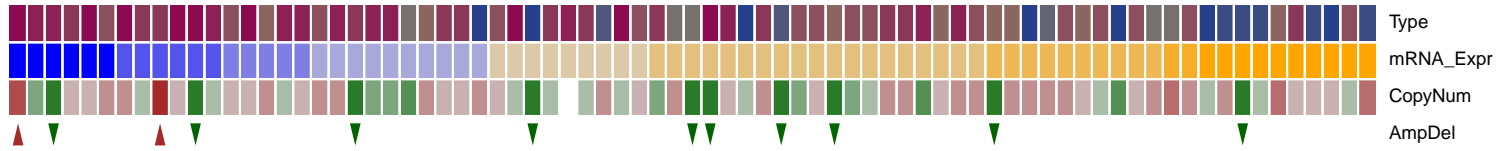

TCGA-EE-A29L-06  
 TCGA-EE-A2GR-06  
 TCGA-GN-A262-06  
 TCGA-FS-A4F0-06  
 TCGA-D3-A8GL-06  
 TCGA-FS-A4F9-06  
 TCGA-EE-A185-06  
 TCGA-D3-A3ML-06  
 TCGA-3N-A9WB-06  
 TCGA-FS-A1ZG-06  
 TCGA-GN-A81K-06  
 TCGA-ER-A3FS-06  
 TCGA-FS-A1ZE-06  
 TCGA-GN-A4U7-06  
 TCGA-EE-A377-06  
 TCGA-FS-A1ZY-06  
 TCGA-FS-A1ZZ-06  
 TCGA-D9-A1Z3-06  
 TCGA-GN-A268-06  
 TCGA-EE-A29D-06  
 TCGA-EE-A160-06  
 TCGA-EE-A3AD-06  
 TCGA-FW-A3I3-06  
 TCGA-FS-A4FB-06  
 TCGA-EE-A29B-06  
 TCGA-D3-A1QA-06  
 TCGA-LH-A9QB-06  
 TCGA-D3-A8GV-06  
 TCGA-EE-A20H-06  
 TCGA-D3-A8GF-06  
 TCGA-D3-A1QA-07  
 TCGA-W3-AA21-06  
 TCGA-WE-A8ZM-06  
 TCGA-DA-A1IA-06  
 TCGA-EE-A17Z-06  
 TCGA-FR-A8YD-06  
 TCGA-D3-A8GC-06  
 TCGA-EE-A3AH-06  
 TCGA-GN-A8LL-06  
 TCGA-D9-A6RG-06  
 TCGA-EE-A29A-06  
 TCGA-FS-A1ZK-06  
 TCGA-ER-A191-06  
 TCGA-DA-A95Z-06  
 TCGA-D3-A1O1-06  
 TCGA-FS-A1Z1-06  
 TCGA-YG-A33P-06  
 TCGA-RP-A690-06  
 TCGA-D3-A5GL-06  
 TCGA-RP-A69E-06  
 TCGA-D6-A4Z6-06  
 TCGA-FS-A1YW-06  
 TCGA-EE-A29E-06  
 TCGA-FR-A708-06  
 TCGA-WE-A8JZ-06  
 TCGA-FS-A4F5-06  
 TCGA-D3-A1O5-06  
 TCGA-EE-A2A5-06  
 TCGA-D3-A8GI-06  
 TCGA-FS-A1Z3-06  
 TCGA-DA-A95W-06  
 TCGA-EE-A2GO-06  
 TCGA-ER-A19F-06  
 TCGA-EE-A20C-06  
 TCGA-D3-A3C6-06  
 TCGA-FS-A1ZU-06  
 TCGA-ER-A42K-06  
 TCGA-EE-A378-06  
 TCGA-WE-A8ZQ-06  
 TCGA-D9-A8K6-06  
 TCGA-EE-A6EC-06  
 TCGA-EE-A3JI-06  
 TCGA-D3-A3MO-06  
 TCGA-FS-A1ZC-06  
 TCGA-W3-A824-06  
 TCGA-EE-A2MM-06

# HEG1

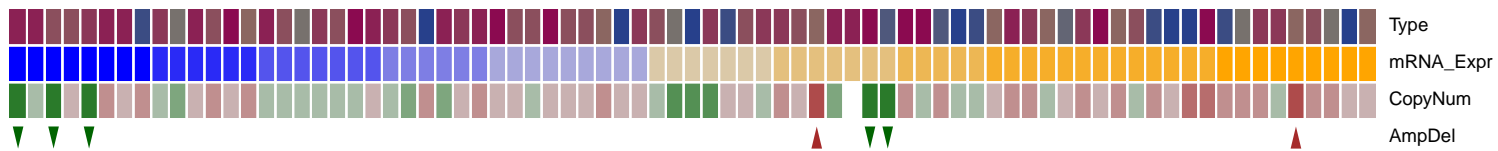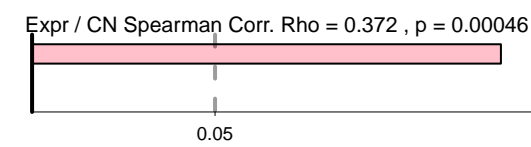

3 : 124776153  
 3 : 124776038  
 3 : 124775112  
 3 : 124774877  
 3 : 124774855  
 3 : 124774507  
 3 : 124774370  
 3 : 124773106  
 3 : 124772735  
 3 : 124769499  
 3 : 124768294  
 3 : 124762597  
 3 : 124757815  
 3 : 124756559  
 3 : 124744120  
 3 : 124732817  
 3 : 124732807  
 3 : 124732775  
 3 : 124732722  
 3 : 124732494  
 3 : 124730836  
 3 : 124722991  
 3 : 124719009  
 3 : 124705145  
 3 : 124699654  
 3 : 124684891

GeneLoc  
 PromoterAssoc  
 CpGIsland

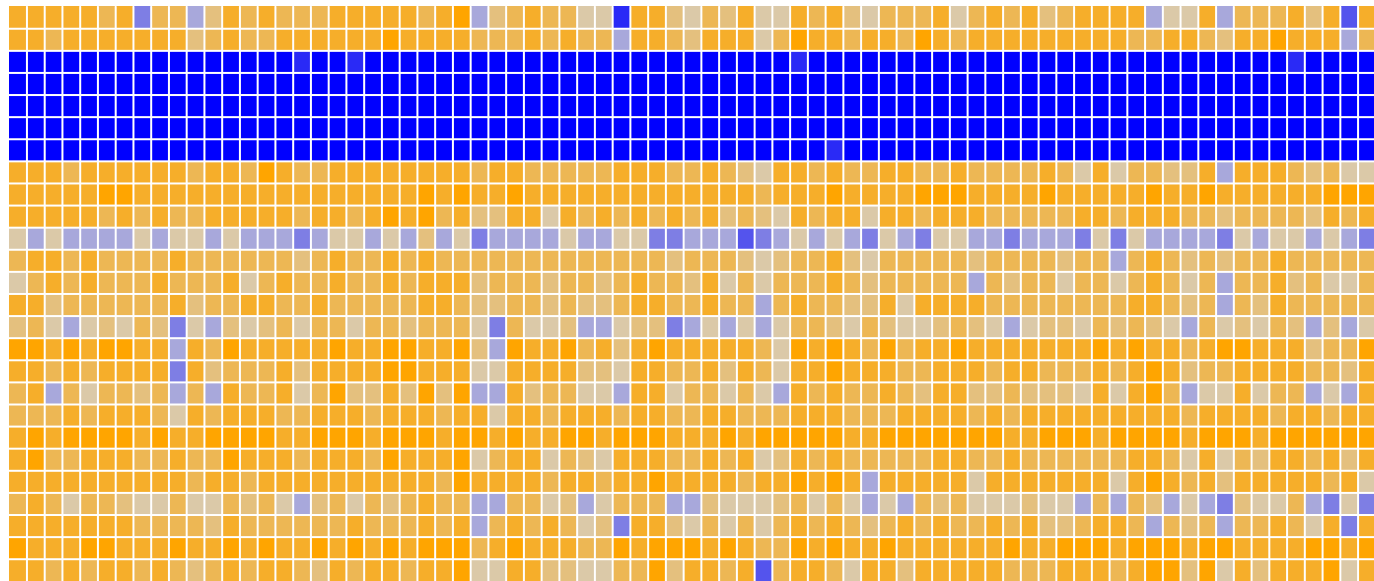

cg01311222  
 cg14706455  
 cg24166786  
 cg04525508  
 cg15113064  
 cg23053438  
 cg24491122  
 cg01378515  
 cg00529567  
 cg03544453  
 cg16143049  
 cg16044109  
 cg20893532  
 cg26102819  
 cg03440673  
 cg03323614  
 cg25201381  
 cg11890301  
 cg04425094  
 cg17618528  
 cg00213745  
 cg22828305  
 cg18008247  
 cg11029367  
 cg03805782  
 cg02005664

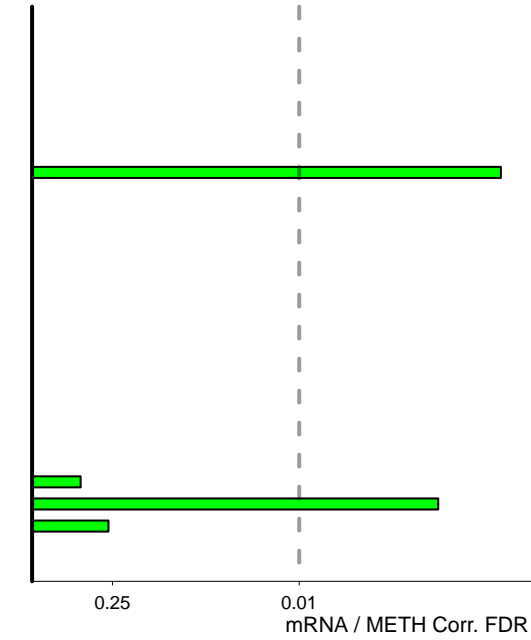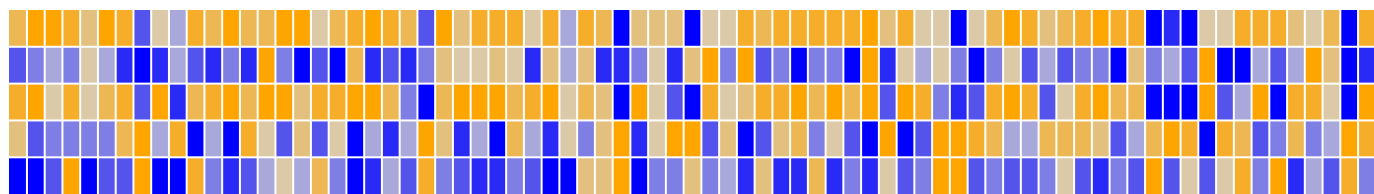

MITF  
 SOX10  
 TRPM1  
 ZEB1  
 AXL

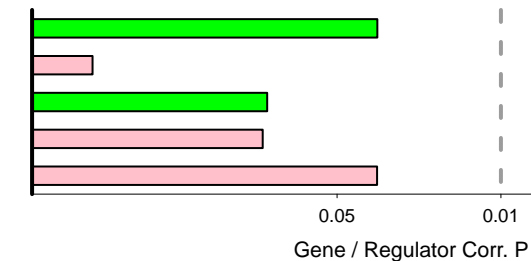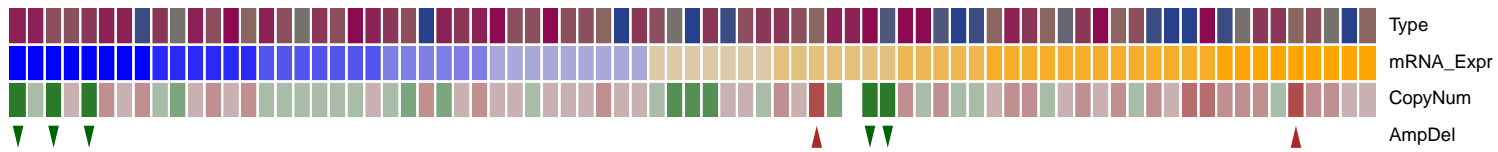

TCGA-GN-A262-06  
 TCGA-ER-A3ES-06  
 TCGA-YG-AA3P-06  
 TCGA-D3-A1Q1-06  
 TCGA-D3-A8GF-06  
 TCGA-EE-A2GR-06  
 TCGA-FS-A1Z2-06  
 TCGA-WE-A8K6-06  
 TCGA-W3-AA21-06  
 TCGA-EE-A20C-06  
 TCGA-ER-A29F-06  
 TCGA-ER-A7U8-06  
 TCGA-FS-A1ZG-06  
 TCGA-FS-A4FB-06  
 TCGA-FS-A1ZY-06  
 TCGA-PP-A690-06  
 TCGA-FW-A313-06  
 TCGA-3L-A9WB-06  
 TCGA-W3-A824-06  
 TCGA-EE-A29L-06  
 TCGA-D9-A6EC-06  
 TCGA-EE-A3JL-06  
 TCGA-DA-A95Z-06  
 TCGA-LH-A9QB-06  
 TCGA-EE-A180-06  
 TCGA-EE-A29B-06  
 TCGA-EE-A3AD-06  
 TCGA-FS-A1ZE-06  
 TCGA-DA-A95W-06  
 TCGA-GN-A8LK-06  
 TCGA-D3-A8GV-06  
 TCGA-ER-A19F-06  
 TCGA-WE-A8JZ-06  
 TCGA-EE-A2GO-06  
 TCGA-FS-A4FO-06  
 TCGA-D3-A3C6-06  
 TCGA-D3-A1Q5-06  
 TCGA-ER-A8YD-06  
 TCGA-D3-A3MO-06  
 TCGA-EE-A17Z-06  
 TCGA-D3-A1Q2-06  
 TCGA-D3-A5GI-06  
 TCGA-FS-A4F9-06  
 TCGA-D9-A6EC-06  
 TCGA-GN-A268-06  
 TCGA-D3-A1Q3-07  
 TCGA-GN-A8LI-06  
 TCGA-ER-A191-06  
 TCGA-EE-A18E-06  
 TCGA-D3-A8GR-06  
 TCGA-WE-A8ZM-06  
 TCGA-EE-A29A-06  
 TCGA-WE-A8ZQ-06  
 TCGA-FS-A1Z3-06  
 TCGA-FS-A1ZK-06  
 TCGA-FS-A4F5-06  
 TCGA-EE-A2A5-06  
 TCGA-EE-A29D-06  
 TCGA-D3-A8GL-06  
 TCGA-FS-A1ZJ-06  
 TCGA-D9-A1X3-06  
 TCGA-EE-A2MM-06  
 TCGA-ER-A42K-06  
 TCGA-EE-A20H-06  
 TCGA-DA-A1IA-06  
 TCGA-EE-A3J8-06  
 TCGA-D3-A8GC-06  
 TCGA-RP-A695-06  
 TCGA-D3-A3ML-06  
 TCGA-EE-A3J7-06  
 TCGA-D3-A8GI-06  
 TCGA-EE-A3AH-06  
 TCGA-FS-A1ZC-06  
 TCGA-FS-A1YW-06

# SPEG

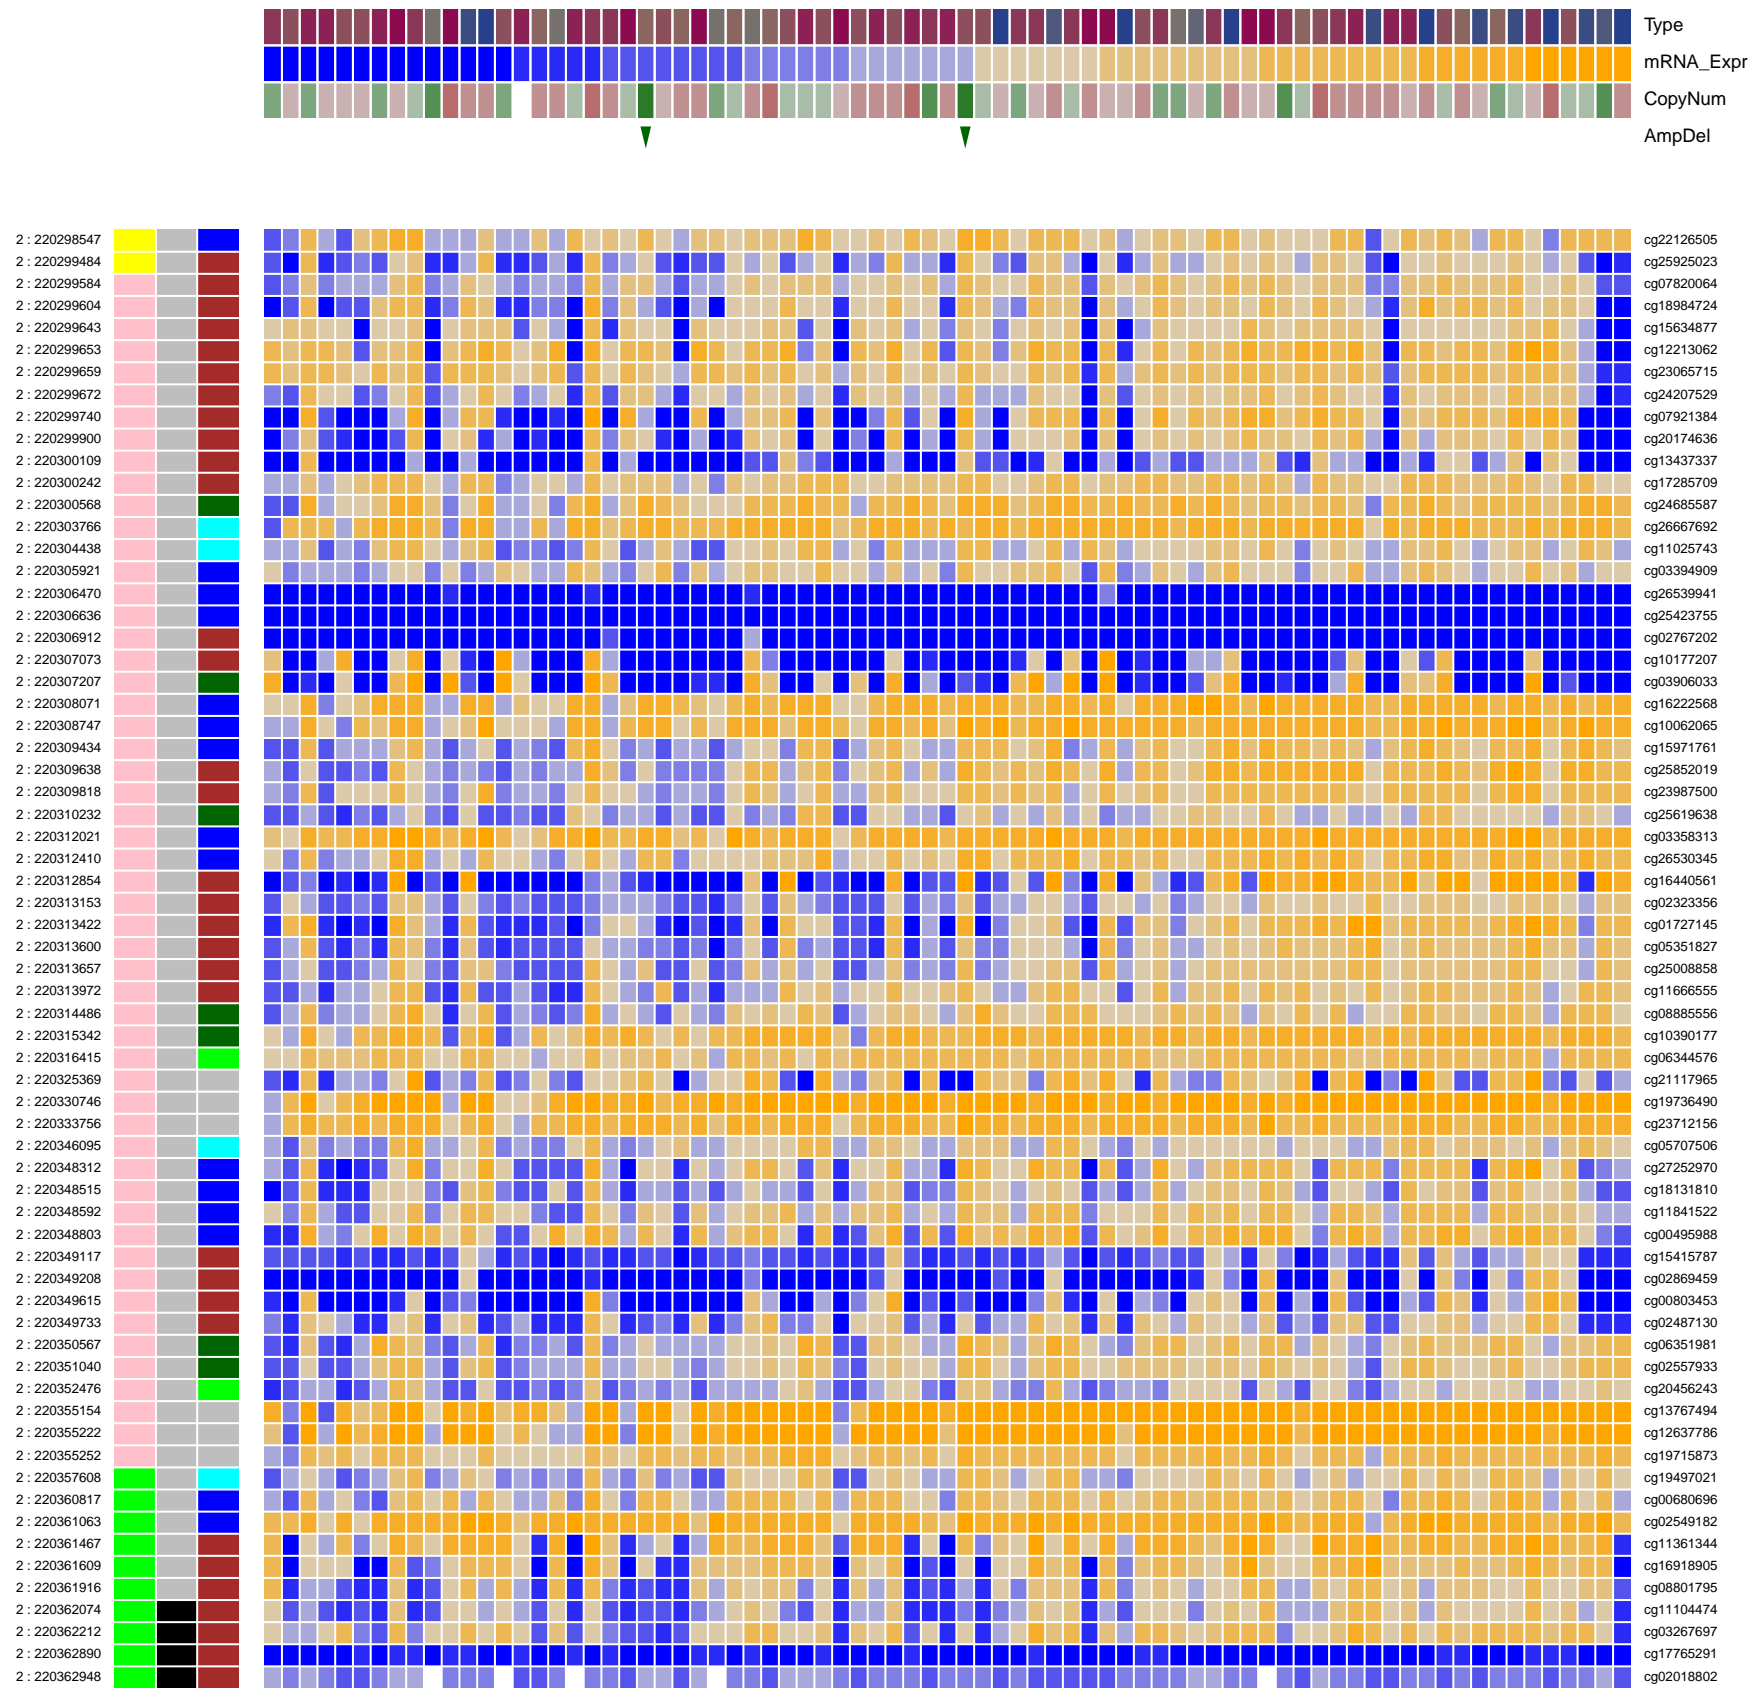

GeneLoc  
PromoterAssoc  
CpGisland

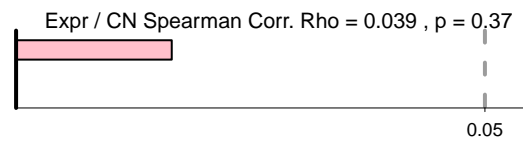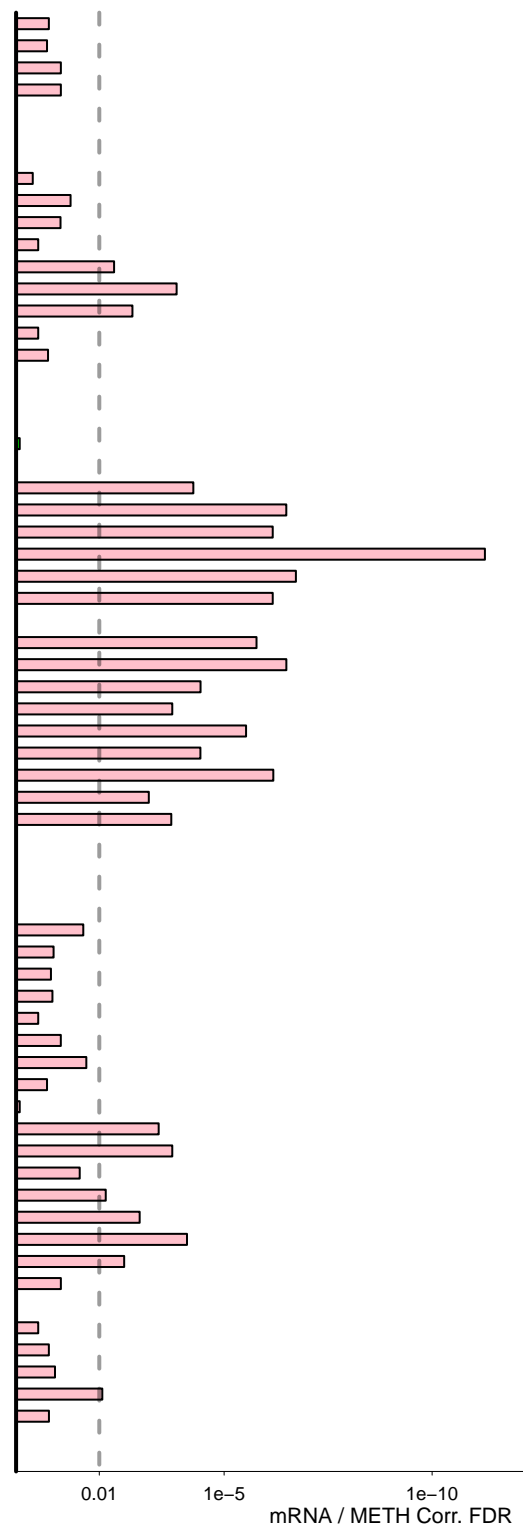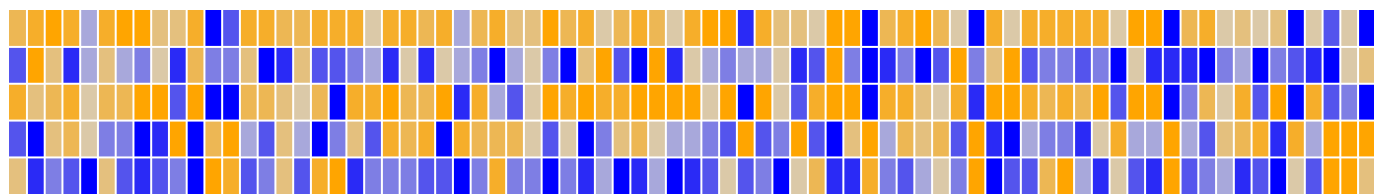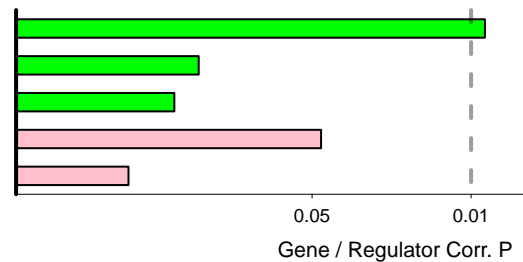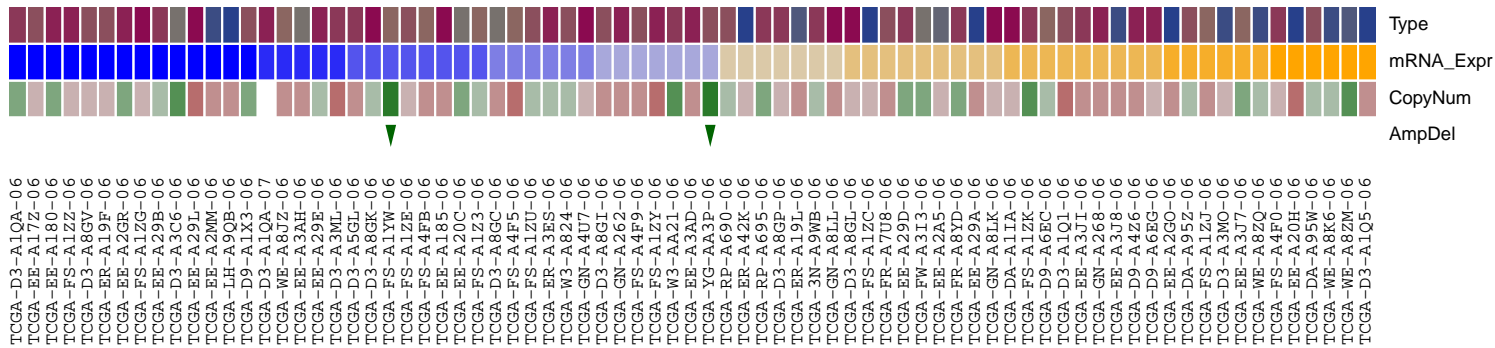



# FBN1

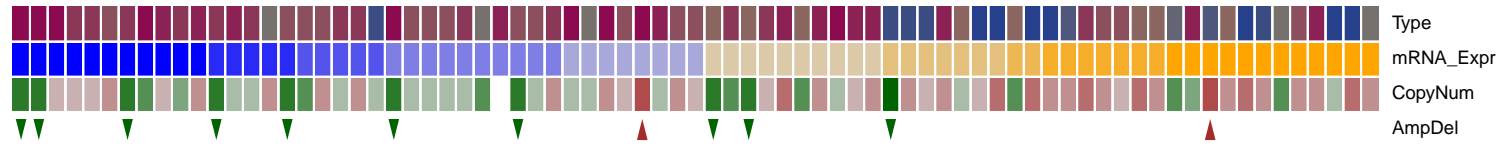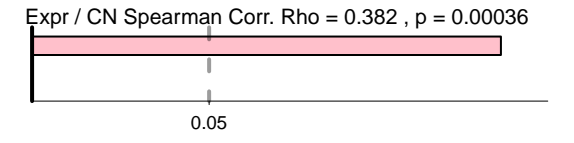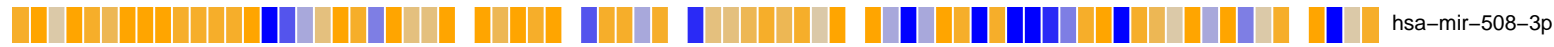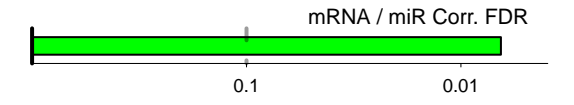

- 15 : 48939483
- 15 : 48938775
- 15 : 48938576
- 15 : 48938370
- 15 : 48938347
- 15 : 48938239
- 15 : 48937958
- 15 : 48937856
- 15 : 48937319
- 15 : 48937213
- 15 : 48936953
- 15 : 48936335
- 15 : 48936208
- 15 : 48935514
- 15 : 48931946
- 15 : 48925049
- 15 : 48918030
- 15 : 48895633
- 15 : 48874903
- 15 : 48846541
- 15 : 48839797
- 15 : 48829009
- 15 : 48822481
- 15 : 48822052
- 15 : 48819726
- 15 : 48785738
- 15 : 48752032
- 15 : 48732134
- 15 : 48726513
- 15 : 48713793
- 15 : 48705662

GeneLoc  
PromoterAssoc  
CpGIsland

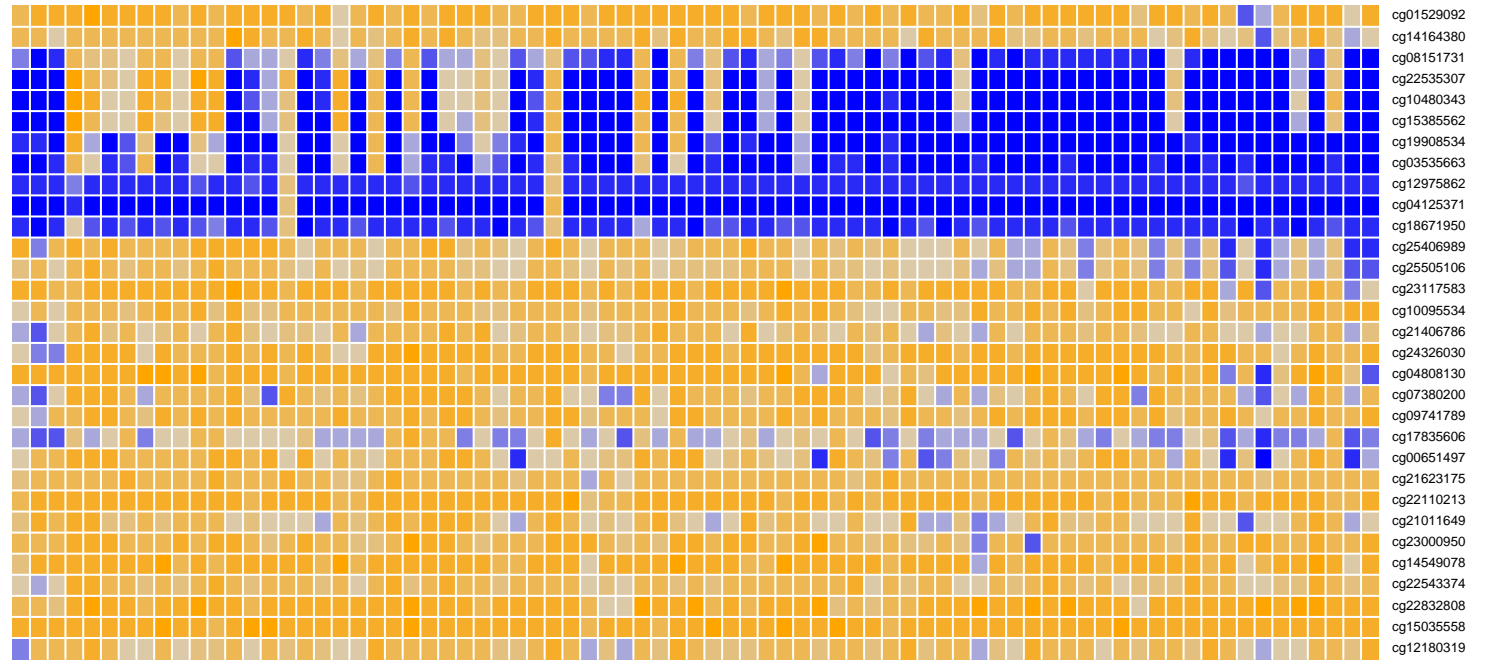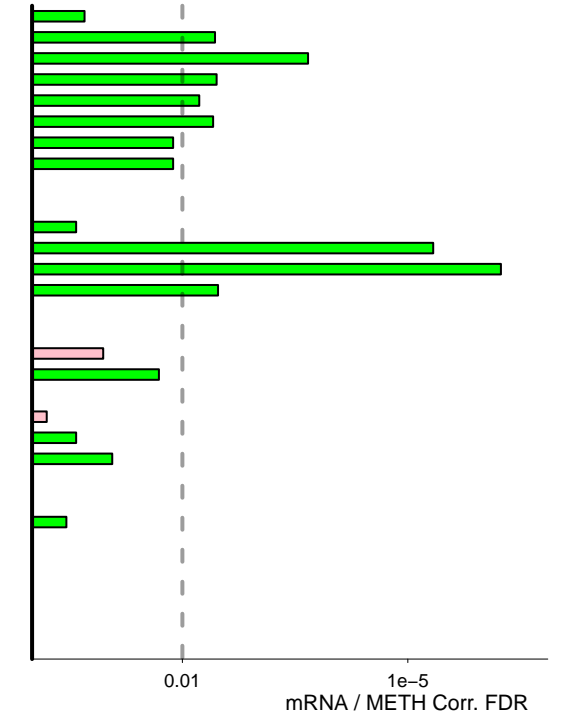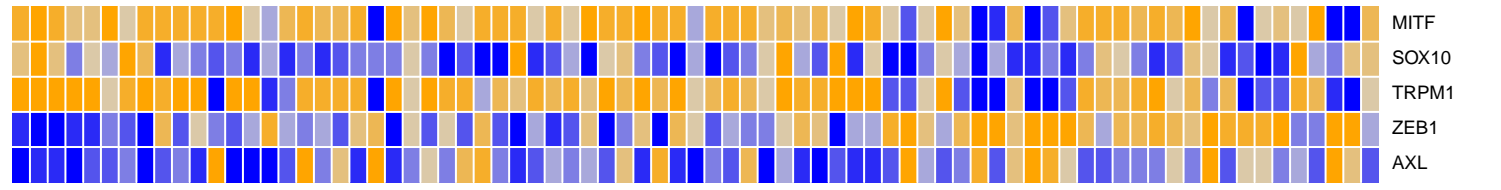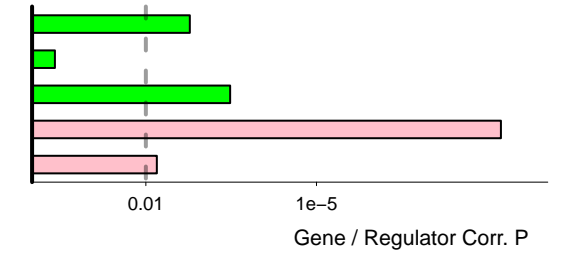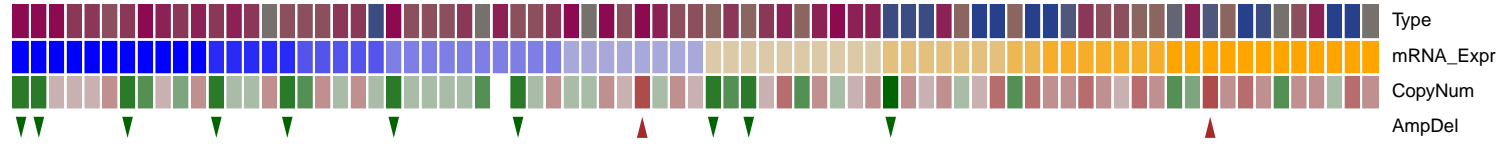

- TCGA-GN-A8LK-06
- TCGA-GN-A8LL-06
- TCGA-GN-A4U7-06
- TCGA-FS-A4F0-06
- TCGA-EE-A29B-06
- TCGA-YG-AA3P-06
- TCGA-FR-A8YD-06
- TCGA-EE-A29L-06
- TCGA-FS-A1ZZ-06
- TCGA-RP-A695-06
- TCGA-GN-A268-06
- TCGA-D3-A3ML-06
- TCGA-ER-A3ES-06
- TCGA-W3-AA21-06
- TCGA-EE-A20C-06
- TCGA-D3-A10L-06
- TCGA-ER-A10I-06
- TCGA-ER-A7U8-06
- TCGA-D3-A1QA-06
- TCGA-D3-A5GL-06
- TCGA-EE-A2MM-06
- TCGA-FS-A1ZG-06
- TCGA-RP-A690-06
- TCGA-RP-A690-06
- TCGA-W3-A824-06
- TCGA-3N-A9WB-06
- TCGA-D3-A8GC-06
- TCGA-D3-A1QA-07
- TCGA-EE-A17Z-06
- TCGA-DA-A95W-06
- TCGA-EE-A3JI-06
- TCGA-D3-A8GK-06
- TCGA-FW-A3I3-06
- TCGA-EE-A185-06
- TCGA-ER-A19F-06
- TCGA-D3-A8GL-06
- TCGA-EE-A29E-06
- TCGA-FS-A4F9-06
- TCGA-D3-A8GV-06
- TCGA-FS-A1ZJ-06
- TCGA-FS-A1ZK-06
- TCGA-D9-A6EC-06
- TCGA-D3-A8GP-06
- TCGA-FS-A1ZY-06
- TCGA-EE-A3J7-06
- TCGA-GN-A262-06
- TCGA-DA-A1IA-06
- TCGA-D9-A6EG-06
- TCGA-EE-A3AD-06
- TCGA-WE-A8KZ-06
- TCGA-WE-A8K6-06
- TCGA-D3-A3M0-06
- TCGA-D9-A4Z6-06
- TCGA-FS-A4F5-06
- TCGA-FS-A1ZC-06
- TCGA-ER-A4ZK-06
- TCGA-WE-A6JZ-06
- TCGA-EE-A2GO-06
- TCGA-LH-A9QB-06
- TCGA-ER-A19L-06
- TCGA-EE-A29D-06
- TCGA-D9-A1X3-06
- TCGA-FS-A1ZE-06
- TCGA-FS-A1Z3-06
- TCGA-EE-A1YW-06
- TCGA-EE-A2A5-06
- TCGA-WE-A8ZM-06
- TCGA-FS-A4FB-06
- TCGA-EE-A20H-06
- TCGA-EE-A3J8-06
- TCGA-D3-A3C6-06
- TCGA-D3-A8GI-06
- TCGA-EE-A2GR-06
- TCGA-EE-A29A-06
- TCGA-D3-A1O5-06
- TCGA-EE-A3AH-06

# PXDN

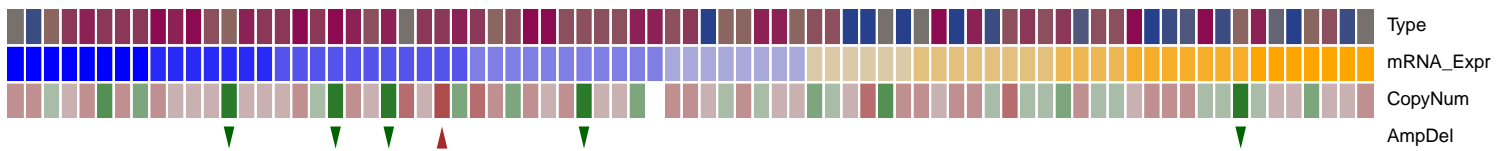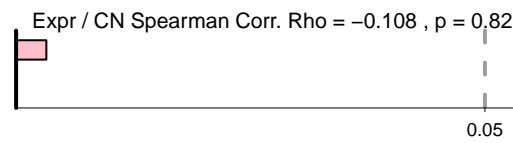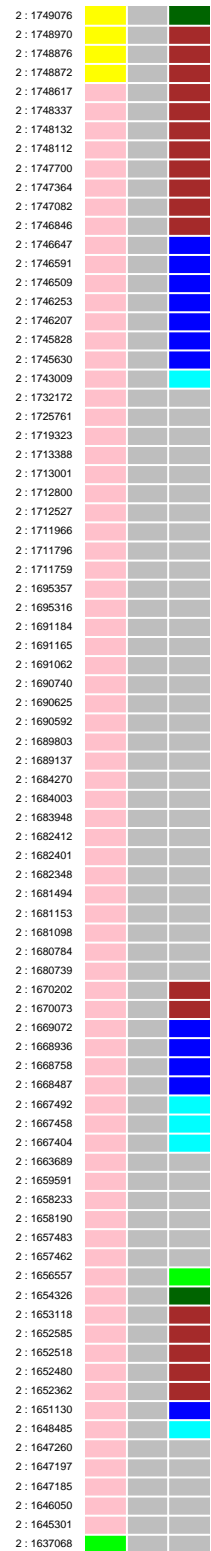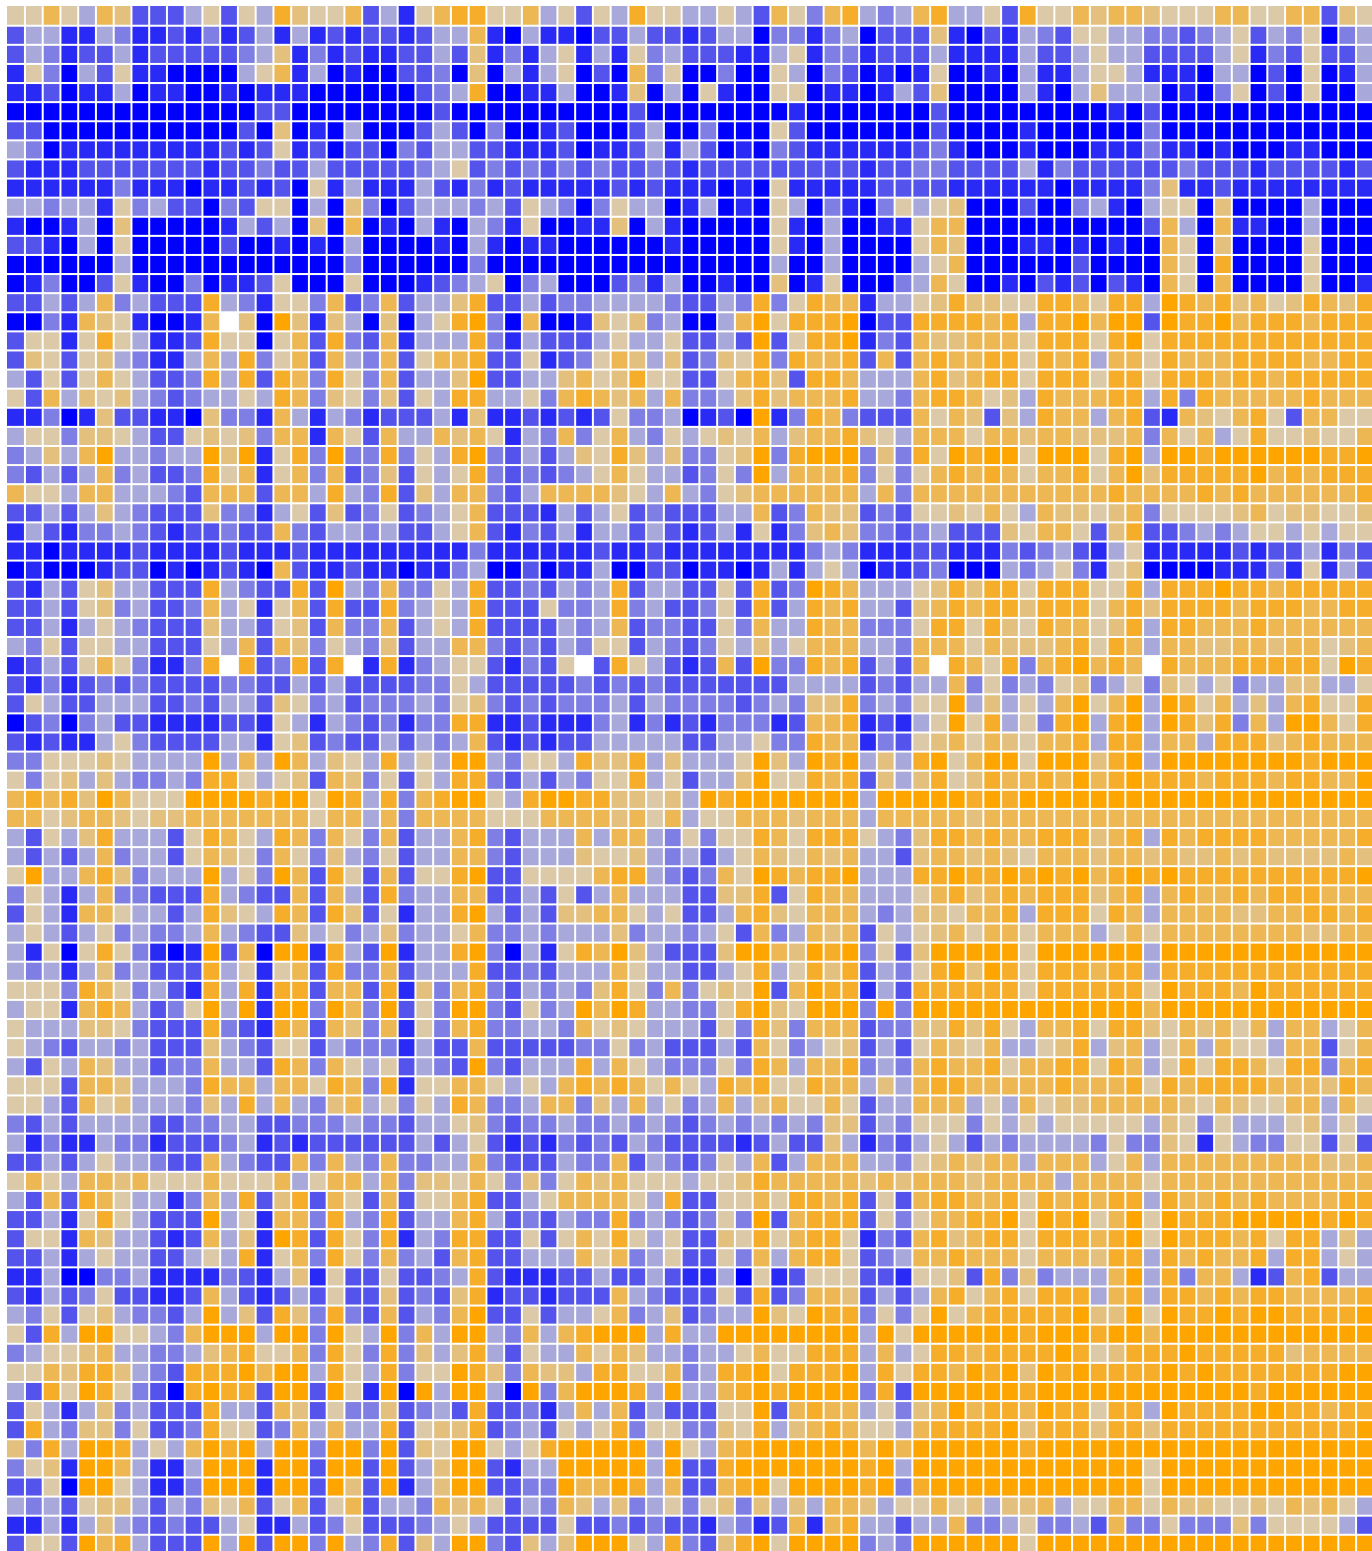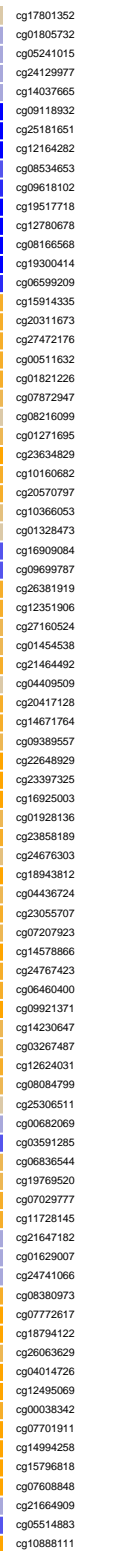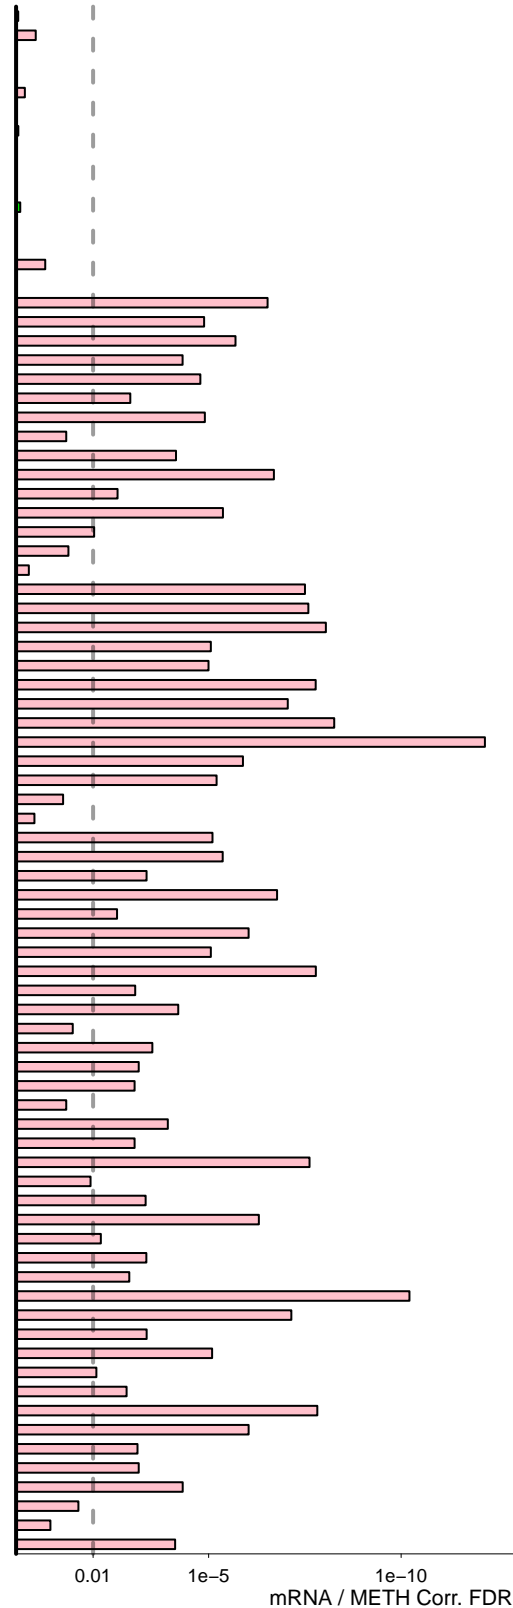

GeneLoc  
PromoterAssoc  
CpGIsland

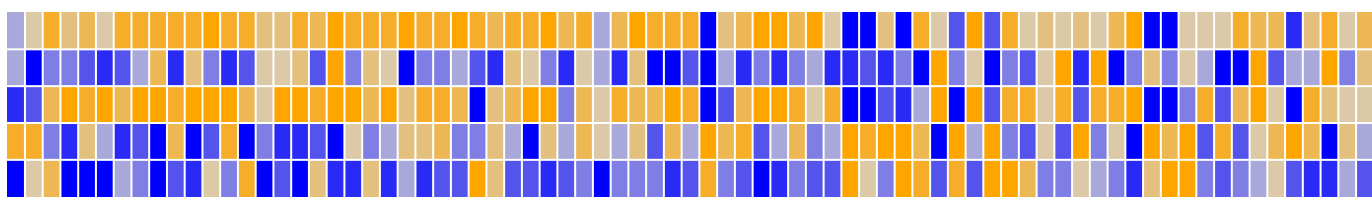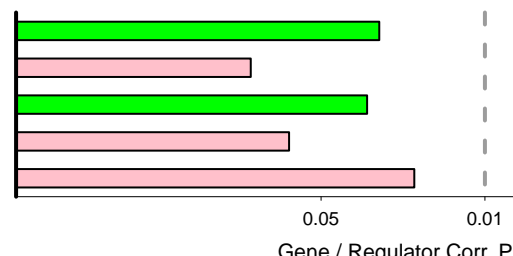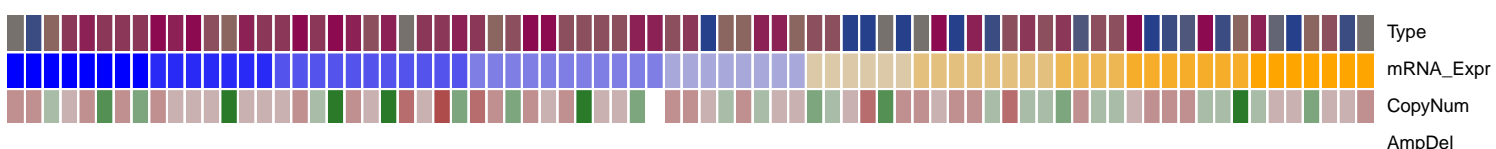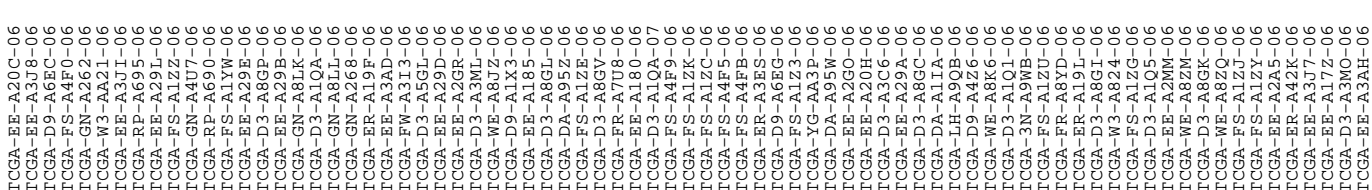

# ALCAM

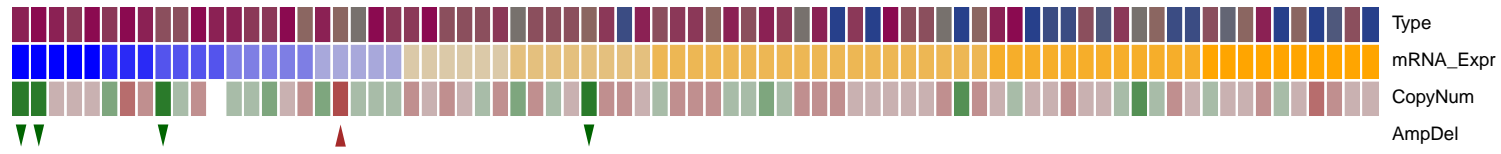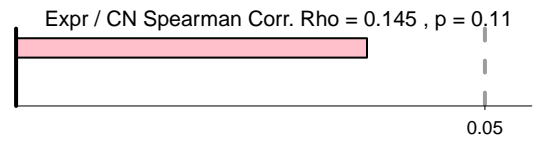

3 : 105085073  
 3 : 105085294  
 3 : 105085463  
 3 : 105085465  
 3 : 105085521  
 3 : 105085562  
 3 : 105085597  
 3 : 105085614  
 3 : 105085633  
 3 : 105085991  
 3 : 105086143  
 3 : 105086213  
 3 : 105086573  
 3 : 105086940  
 3 : 105087171  
 3 : 105087206  
 3 : 105087242  
 3 : 105087718  
 3 : 105088088  
 3 : 105088098  
 3 : 105088217  
 3 : 105088263  
 3 : 105088546  
 3 : 105105844  
 3 : 105133817  
 3 : 105149981  
 3 : 105159482  
 3 : 105166570  
 3 : 105167621  
 3 : 105178356  
 3 : 105191532  
 3 : 105221308  
 3 : 105228864  
 3 : 105236259  
 3 : 105244696  
 3 : 105293613

GeneLoc  
 PromoterAssoc  
 CpGIsland

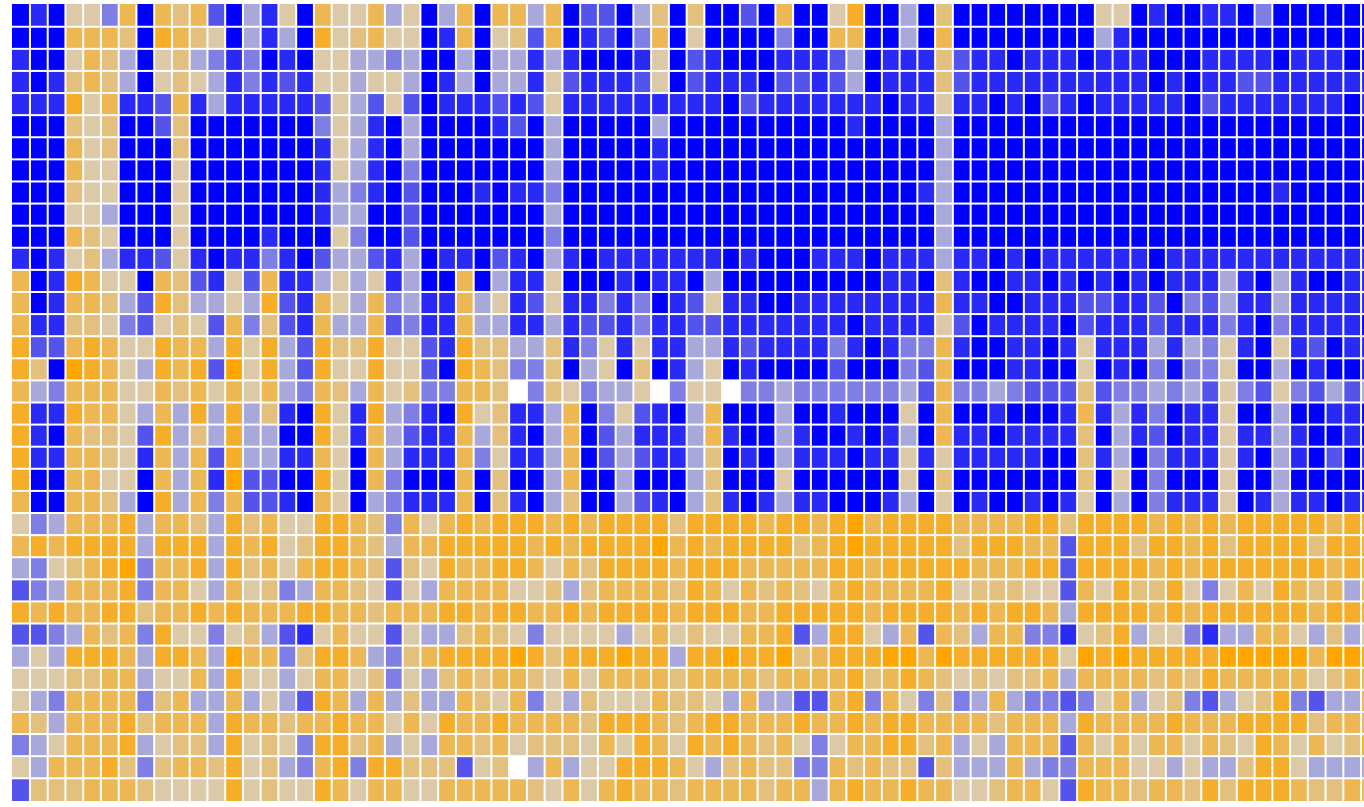

cg09222287  
 cg09684136  
 cg16338347  
 cg24173411  
 cg08519233  
 cg19499955  
 cg17550268  
 cg02866870  
 cg14644166  
 cg02582608  
 cg08143003  
 cg08454485  
 cg18081171  
 cg03376719  
 cg22557207  
 cg03416645  
 cg05645404  
 cg12226306  
 cg07677545  
 cg07942010  
 cg18453904  
 cg19254830  
 cg21548071  
 cg00387117  
 cg06648780  
 cg26367456  
 cg24685239  
 cg09610766  
 cg16654432  
 cg15423944  
 cg21832978  
 cg24273728  
 cg09025274  
 cg04912993  
 cg11620689  
 cg19852058

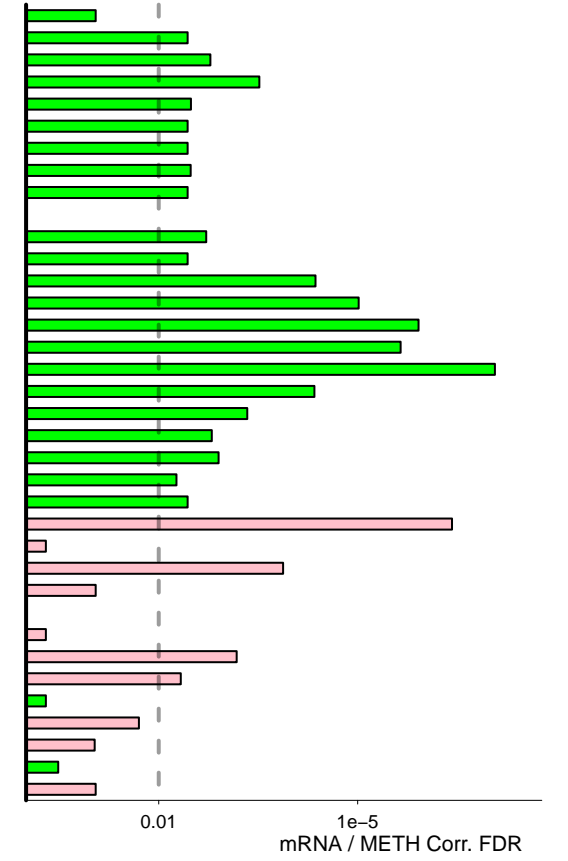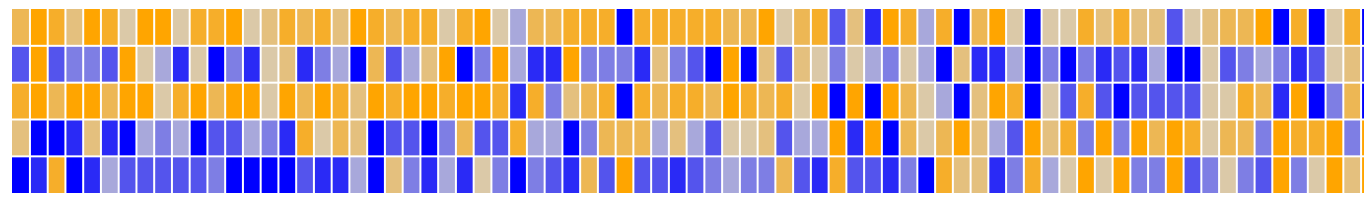

MITF  
 SOX10  
 TRPM1  
 ZEB1  
 AXL

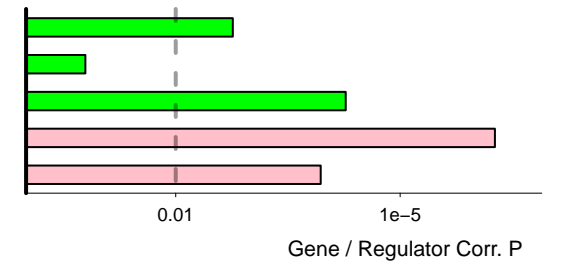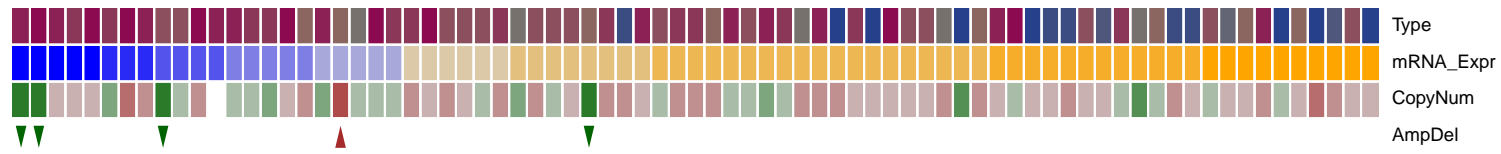

TCGA-GN-A262-06  
 TCGA-GN-A8LL-06  
 TCGA-EE-A29E-06  
 TCGA-FS-A4FO-06  
 TCGA-D3-A8GL-06  
 TCGA-EE-A3JI-06  
 TCGA-DA-A1IA-06  
 TCGA-D9-A4Z6-06  
 TCGA-YG-AA3P-06  
 TCGA-DA-A95W-06  
 TCGA-EE-A185-06  
 TCGA-D3-A1O8-07  
 TCGA-EE-A3ES-06  
 TCGA-W3-AA21-06  
 TCGA-D3-A8GP-06  
 TCGA-GN-A8LK-06  
 TCGA-FS-A4FB-06  
 TCGA-GN-A265-06  
 TCGA-EE-A3U7-06  
 TCGA-FW-A313-06  
 TCGA-EE-A29L-06  
 TCGA-D3-A1QA-06  
 TCGA-RP-A695-06  
 TCGA-GN-A4U7-06  
 TCGA-D3-A8GI-06  
 TCGA-FS-A4F9-06  
 TCGA-RP-A690-06  
 TCGA-FR-A8YD-06  
 TCGA-EE-A20C-06  
 TCGA-FR-A7U8-06  
 TCGA-DA-A95Z-06  
 TCGA-EE-A17Z-06  
 TCGA-D9-A6EC-06  
 TCGA-EE-A29D-06  
 TCGA-EE-A2MM-06  
 TCGA-FS-A1ZZ-06  
 TCGA-D9-A1X3-06  
 TCGA-D3-A5GL-06  
 TCGA-FS-A1ZK-06  
 TCGA-FS-A1ZJ-06  
 TCGA-FS-A1ZY-06  
 TCGA-W3-A824-06  
 TCGA-EE-A180-06  
 TCGA-3N-A9WB-06  
 TCGA-EE-A3AH-06  
 TCGA-EE-A3AD-06  
 TCGA-LH-A9OB-06  
 TCGA-EE-A29B-06  
 TCGA-EE-A42K-06  
 TCGA-FS-A1ZS-06  
 TCGA-FS-A1ZE-06  
 TCGA-D3-A8GV-06  
 TCGA-D3-A8GC-06  
 TCGA-D3-A1Q5-06  
 TCGA-WE-A8UJ-06  
 TCGA-D9-A6EG-06  
 TCGA-D3-A8GK-06  
 TCGA-FS-A1ZC-06  
 TCGA-D3-A3MO-06  
 TCGA-EE-A3J8-06  
 TCGA-ER-A19L-06  
 TCGA-D3-A3ML-06  
 TCGA-D3-A3C6-06  
 TCGA-FS-A4F5-06  
 TCGA-WE-A8K6-06  
 TCGA-WE-A8ZQ-06  
 TCGA-FS-A1ZU-06  
 TCGA-EE-A2A5-06  
 TCGA-FS-A1Z3-06  
 TCGA-EE-A2GR-06  
 TCGA-EE-A29A-06  
 TCGA-FS-A1YW-06  
 TCGA-EE-A20H-06  
 TCGA-WE-A8ZM-06  
 TCGA-ER-A19F-06  
 TCGA-EE-A2GO-06

# GLIS3

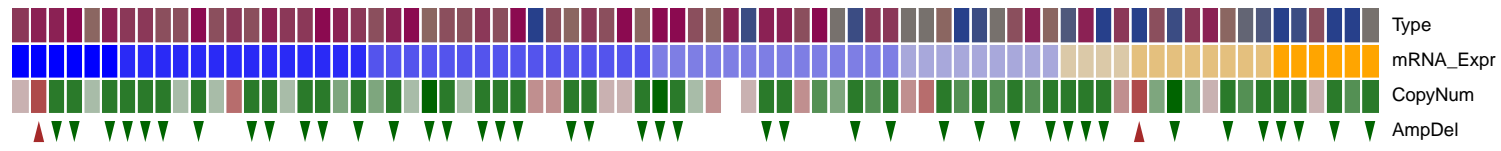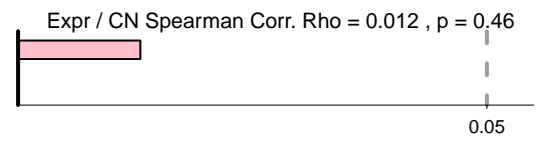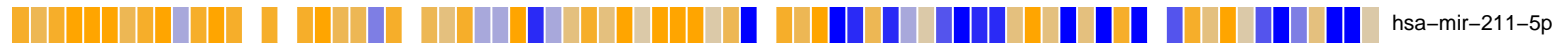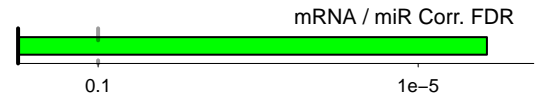

9: 4300432  
9: 4300203  
9: 4299830  
9: 4299768  
9: 4299549  
9: 4299221  
9: 4298749  
9: 4298452  
9: 4298157  
9: 4297626  
9: 4297433  
9: 4294020  
9: 4151723  
9: 4139392  
9: 4133112  
9: 4118572  
9: 4118274  
9: 4116989  
9: 4116422  
9: 4115070  
9: 4083904  
9: 4080919  
9: 4056108  
9: 4021482  
9: 3899055  
9: 3874932  
9: 3828562

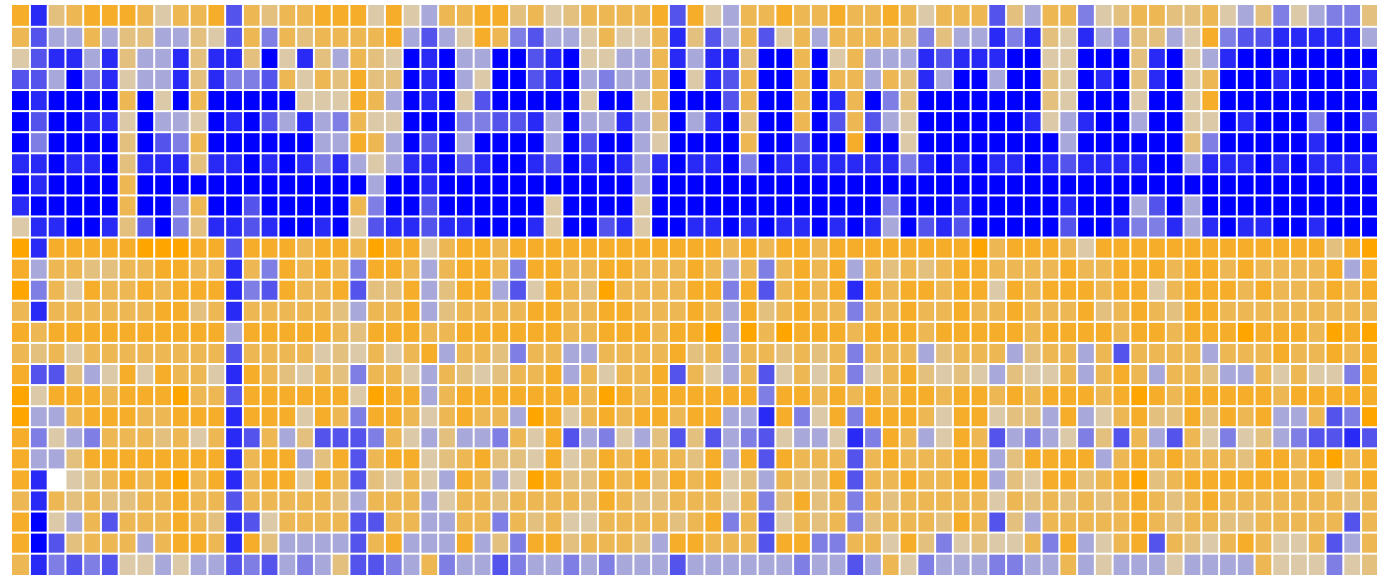

cg23053961  
cg10836809  
cg13513288  
cg23333878  
cg14114673  
cg08303922  
cg13802457  
cg05052888  
cg14177784  
cg14110111  
cg01619345  
cg13573115  
cg09386615  
cg14302428  
cg13749266  
cg05109791  
cg04010205  
cg06935438  
cg13936363  
cg14325112  
cg14641122  
cg14047387  
cg14318068  
cg14066405  
cg14269813  
cg13770114  
cg14340481

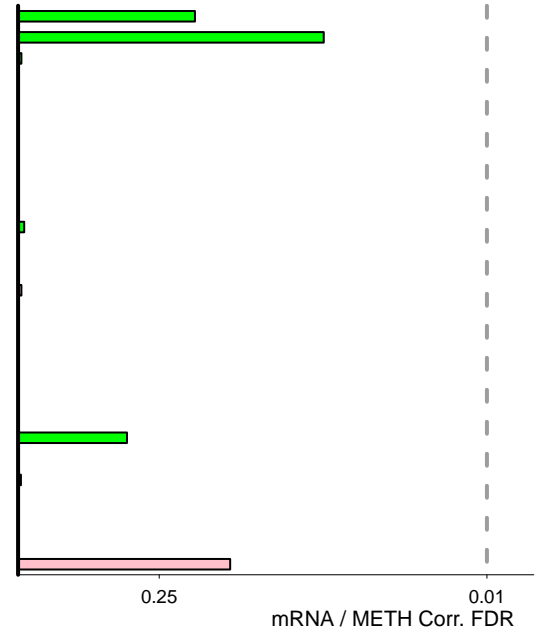

GeneLoc  
PromoterAssoc  
CpGIsland

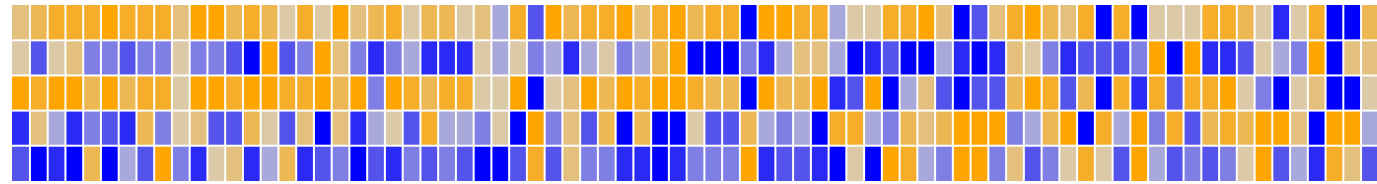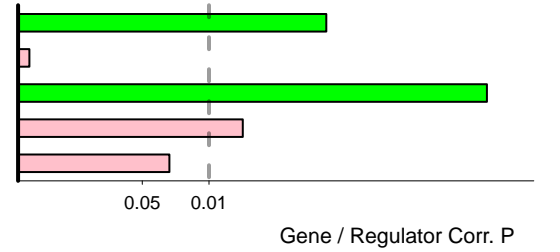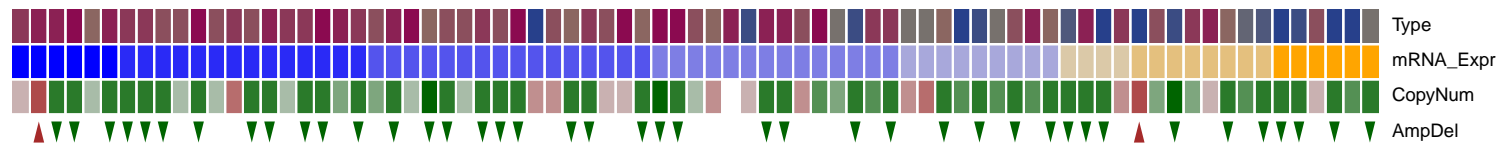

TCGA-EE-A29B-06  
TCGA-GN-A262-06  
TCGA-EE-A3AD-06  
TCGA-GN-A8LK-06  
TCGA-D9-A6EC-06  
TCGA-ER-A3ES-06  
TCGA-EE-A3JI-06  
TCGA-EE-A29D-06  
TCGA-D3-A1O1-06  
TCGA-FS-A1ZU-06  
TCGA-D3-A8G1-06  
TCGA-EP-A690-06  
TCGA-D3-A1O8-06  
TCGA-FS-A4F9-06  
TCGA-FS-A1ZY-06  
TCGA-3N-A9WB-06  
TCGA-D3-A5CL-06  
TCGA-DA-A1LA-06  
TCGA-EE-A180-06  
TCGA-FS-A4F0-06  
TCGA-DA-A95Z-06  
TCGA-GN-A268-06  
TCGA-D3-A8GK-06  
TCGA-FS-A4FB-06  
TCGA-FR-A7U8-06  
TCGA-DA-A95W-06  
TCGA-D3-A8GP-06  
TCGA-D3-A8GV-06  
TCGA-EE-A185-06  
TCGA-LH-A9QB-06  
TCGA-YG-AA3P-06  
TCGA-WE-A8JZ-06  
TCGA-RP-A695-06  
TCGA-FS-A1ZE-06  
TCGA-FS-A1ZG-06  
TCGA-EE-A3J7-06  
TCGA-EE-A29I-06  
TCGA-GN-A8LI-06  
TCGA-W3-A824-06  
TCGA-FS-A1ZJ-06  
TCGA-D3-A1O8-07  
TCGA-EE-A2MM-06  
TCGA-D9-A6EG-06  
TCGA-D9-A1X3-06  
TCGA-EE-A2GR-06  
TCGA-GN-A4U7-06  
TCGA-D9-A20C-06  
TCGA-EE-A3J8-06  
TCGA-W3-AA21-06  
TCGA-D3-A3MI-06  
TCGA-D3-A8GC-06  
TCGA-FW-A3I3-06  
TCGA-FS-A4F5-06  
TCGA-EE-A2GO-06  
TCGA-WE-A8K6-06  
TCGA-D3-A3C6-06  
TCGA-ER-A19F-06  
TCGA-D9-A4Z6-06  
TCGA-FS-A1Z3-06  
TCGA-EE-A29E-06  
TCGA-EE-A20H-06  
TCGA-FS-A1ZK-06  
TCGA-EE-A29A-06  
TCGA-D3-A8GI-06  
TCGA-WE-A8ZQ-06  
TCGA-FR-A8YD-06  
TCGA-FS-A1ZY-06  
TCGA-EE-A2A5-06  
TCGA-WE-A8ZM-06  
TCGA-ER-A42K-06  
TCGA-D3-A3M0-06  
TCGA-EE-A17Z-06  
TCGA-FS-A1ZC-06  
TCGA-D3-A1O5-06  
TCGA-EE-A3AH-06

# SPOCK1

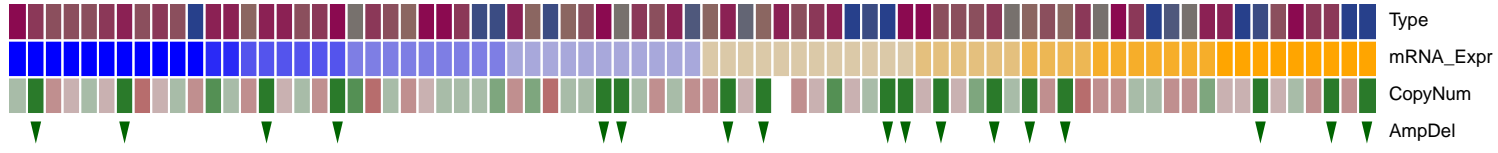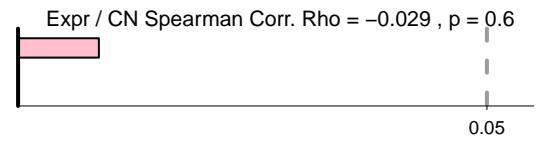

5 : 136837077  
 5 : 136836378  
 5 : 136835107  
 5 : 136834877  
 5 : 136834863  
 5 : 136834492  
 5 : 136834464  
 5 : 136834453  
 5 : 136834392  
 5 : 136834294  
 5 : 136834155  
 5 : 136833893  
 5 : 136833216  
 5 : 136831390  
 5 : 136682394  
 5 : 136646719  
 5 : 136645665  
 5 : 136530712  
 5 : 136481972  
 5 : 136478693  
 5 : 136426335  
 5 : 136374727  
 5 : 136359400  
 5 : 136340207  
 5 : 136340060  
 5 : 136320310  
 5 : 136314223

GeneLoc  
 PromoterAssoc  
 CpIsland

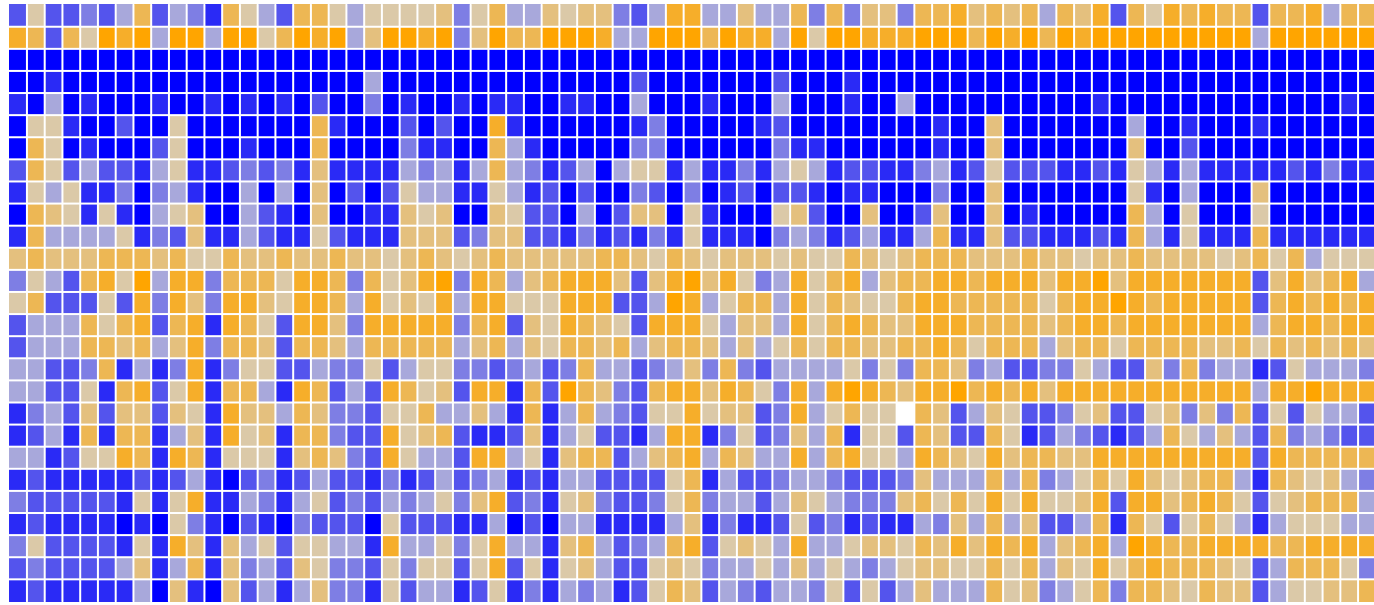

cg06999346  
 cg03639488  
 cg12420858  
 cg05143123  
 cg12832649  
 cg14650610  
 cg24847829  
 cg18263365  
 cg18603028  
 cg09054633  
 cg01104047  
 cg26059202  
 cg04927066  
 cg03656923  
 cg19567866  
 cg17879574  
 cg09642428  
 cg02399826  
 cg26968544  
 cg06438559  
 cg22909935  
 cg17221083  
 cg01402631  
 cg18998172  
 cg22902550  
 cg21582240  
 cg22612642

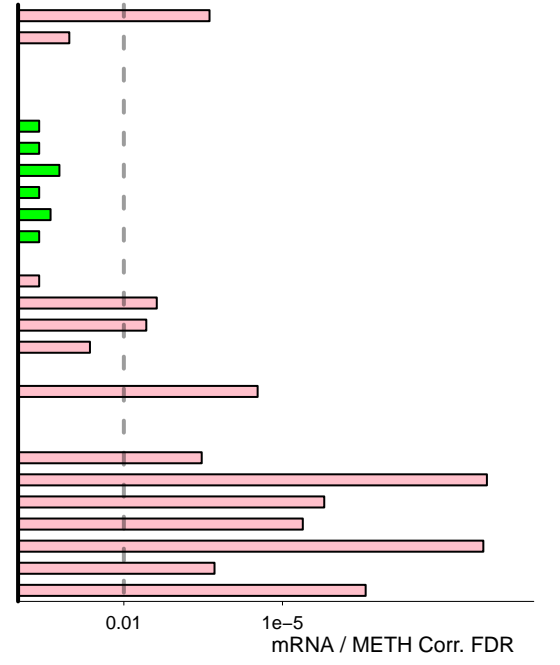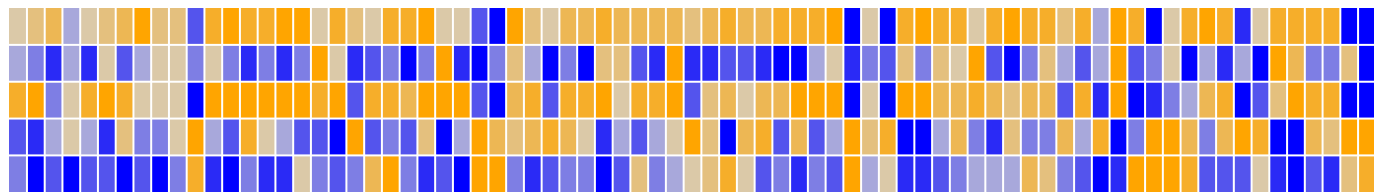

MITF  
 SOX10  
 TRPM1  
 ZEB1  
 AXL

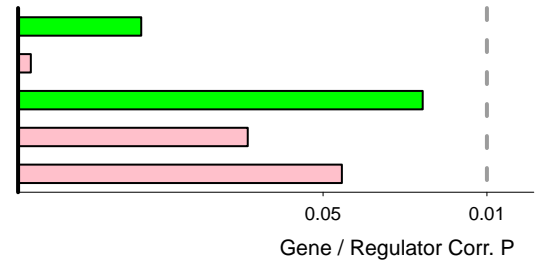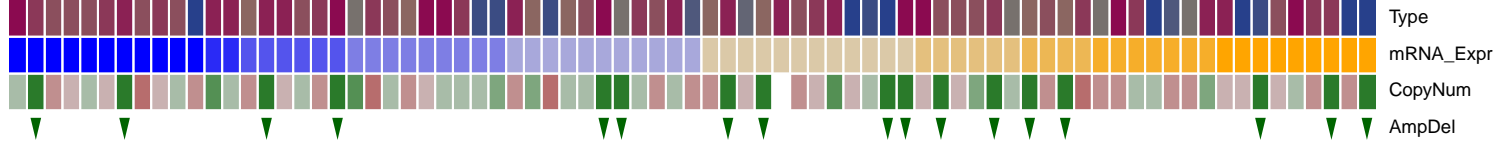

TCGA-D3-A8GK-06  
 TCGA-FS-A4F0-06  
 TCGA-DA-A95Z-06  
 TCGA-D3-A8GV-06  
 TCGA-DA-A95W-06  
 TCGA-EE-A29B-06  
 TCGA-GN-A262-06  
 TCGA-D3-A8GP-06  
 TCGA-FS-A1ZU-06  
 TCGA-LH-A90B-06  
 TCGA-EE-A3AD-06  
 TCGA-ER-A3FS-06  
 TCGA-FS-A1YW-06  
 TCGA-GN-A268-06  
 TCGA-D9-A68C-06  
 TCGA-RP-A690-06  
 TCGA-ER-A8YD-06  
 TCGA-EE-A185-06  
 TCGA-D3-A3C6-06  
 TCGA-3N-A9WB-06  
 TCGA-D3-A1Q1-06  
 TCGA-FS-A1ZU-06  
 TCGA-D3-A8GL-06  
 TCGA-DA-A1IA-06  
 TCGA-W3-AA21-06  
 TCGA-WE-A8K6-06  
 TCGA-EE-A2NM-06  
 TCGA-EE-A180-06  
 TCGA-EE-A3J7-06  
 TCGA-WE-A8ZQ-06  
 TCGA-FS-A1Z3-06  
 TCGA-W3-A824-06  
 TCGA-GN-A8LK-06  
 TCGA-EE-A3AH-06  
 TCGA-D3-A1QA-06  
 TCGA-FR-A7U8-06  
 TCGA-FS-A1ZY-06  
 TCGA-ER-A19L-06  
 TCGA-WE-A8JZ-06  
 TCGA-EE-A29E-06  
 TCGA-EE-A2A5-06  
 TCGA-FS-A4FB-06  
 TCGA-D3-A1QA-07  
 TCGA-FS-A4F9-06  
 TCGA-RP-A695-06  
 TCGA-D9-A4Z6-06  
 TCGA-EE-A2GO-06  
 TCGA-D3-A3MO-06  
 TCGA-EE-A20H-06  
 TCGA-GN-A4J7-06  
 TCGA-FS-A1ZG-06  
 TCGA-D9-A1X3-06  
 TCGA-FS-A1ZF-06  
 TCGA-EE-A3J1-06  
 TCGA-FW-A3I3-06  
 TCGA-D9-A6EC-06  
 TCGA-ER-A19F-06  
 TCGA-FS-A4F5-06  
 TCGA-EE-A20C-06  
 TCGA-EE-A8LL-06  
 TCGA-D3-A3ML-06  
 TCGA-EE-A29A-06  
 TCGA-WE-A8ZM-06  
 TCGA-D3-A8GC-06  
 TCGA-EE-A2GR-06  
 TCGA-FS-A1ZZ-06  
 TCGA-ER-A42K-06  
 TCGA-EE-A3J8-06  
 TCGA-EE-A17Z-06  
 TCGA-EE-A29L-06  
 TCGA-EE-A29D-06  
 TCGA-D3-A5GL-06  
 TCGA-D3-A1Q5-06  
 TCGA-FS-A1ZC-06

# WNT5B

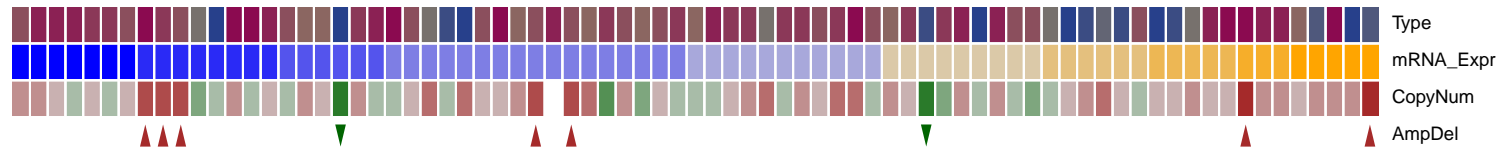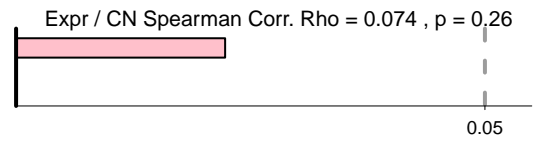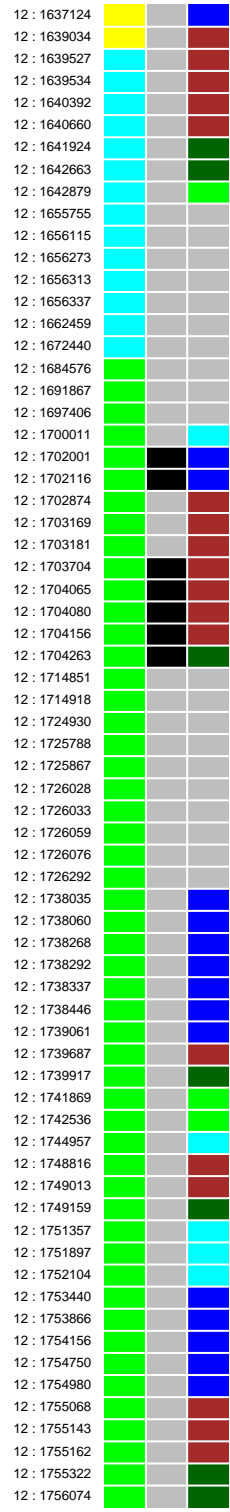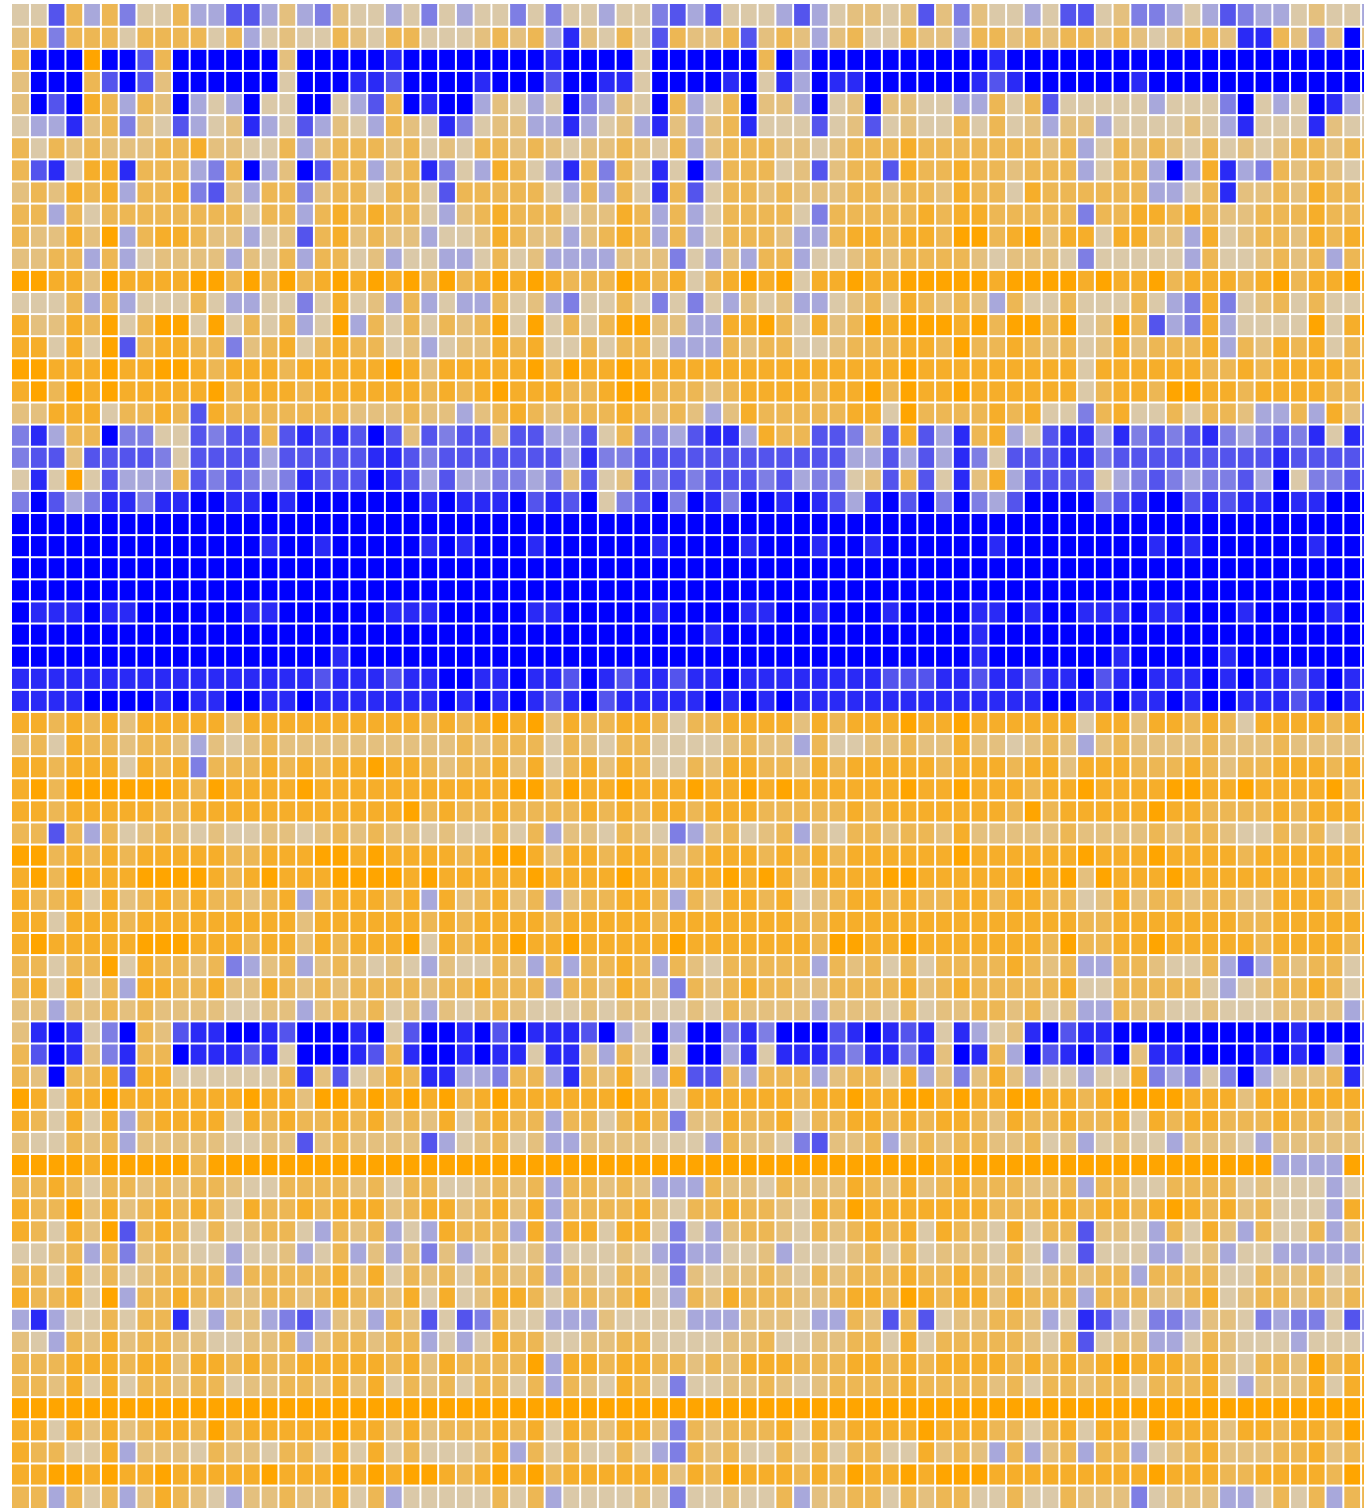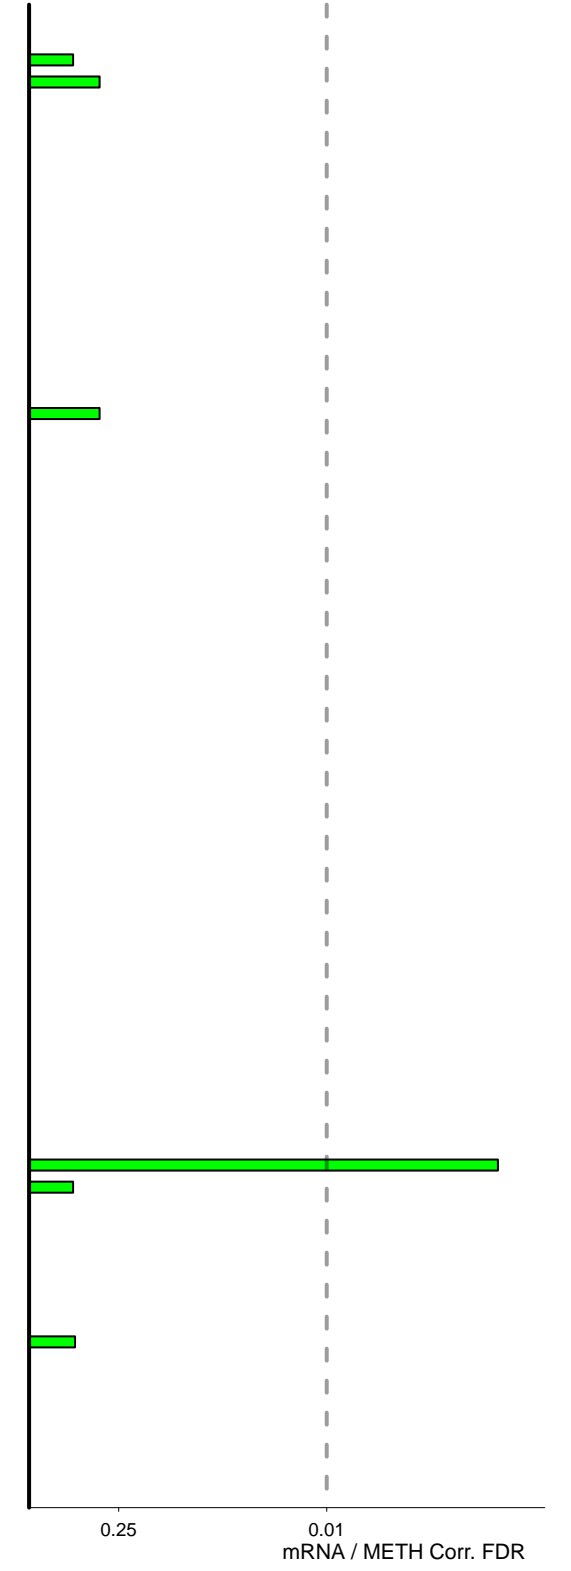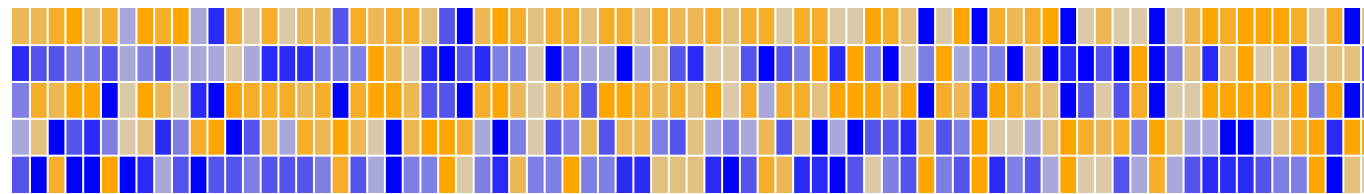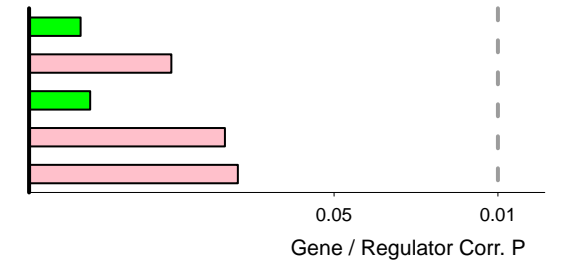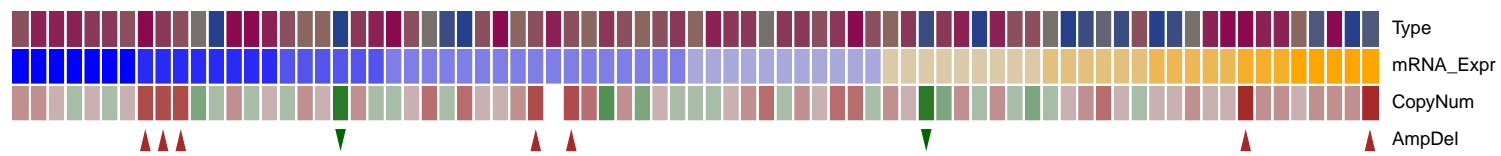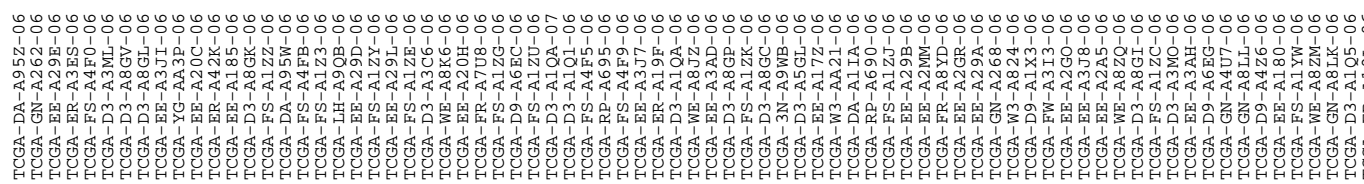

# SLIT2

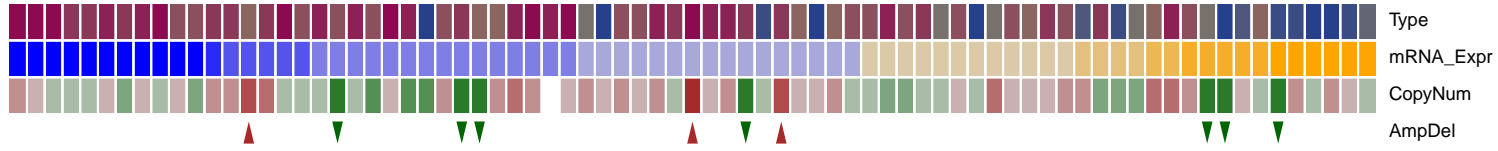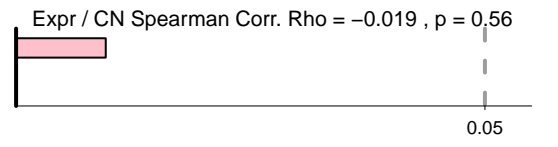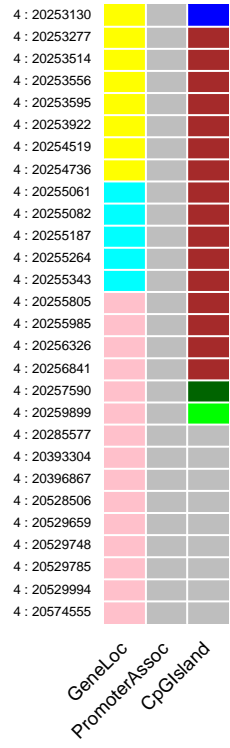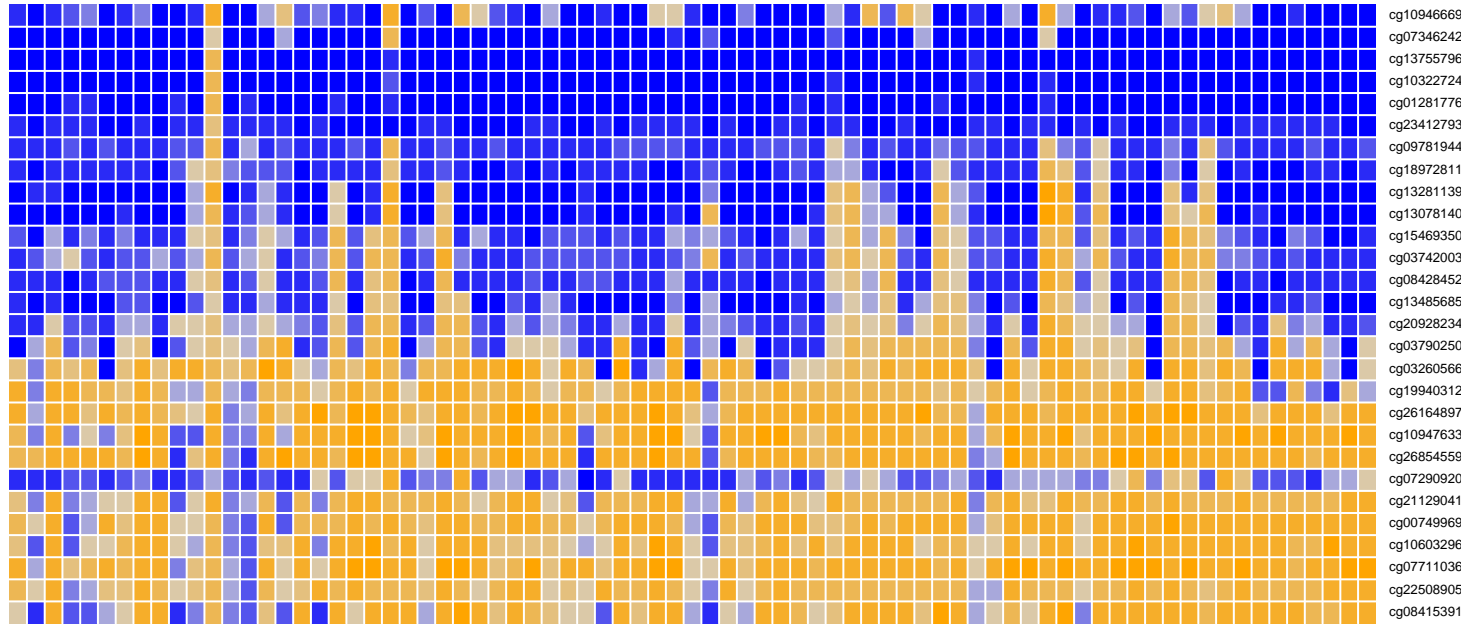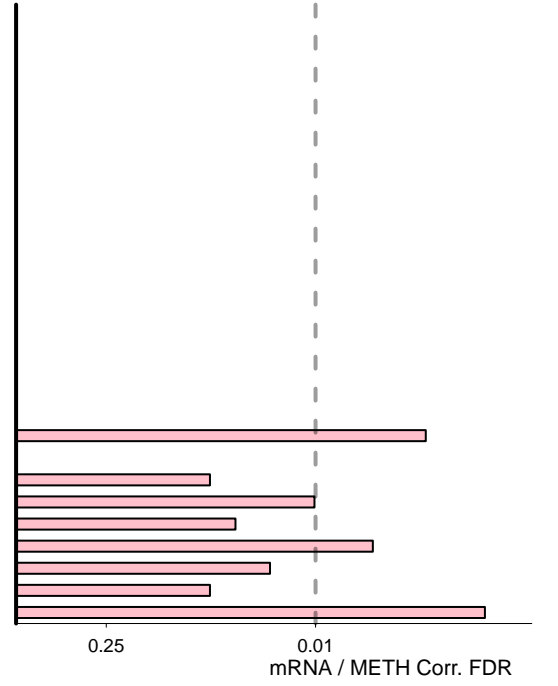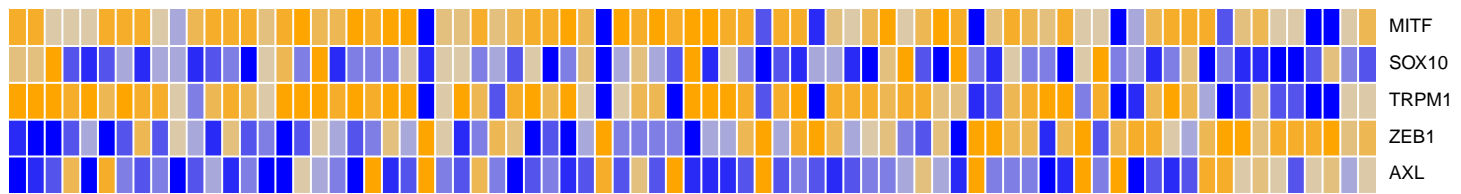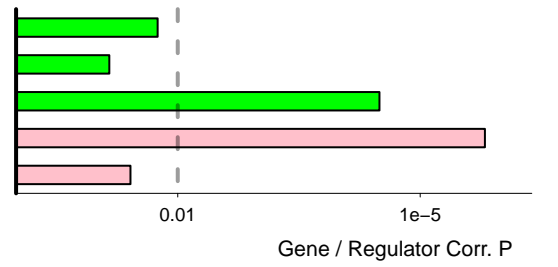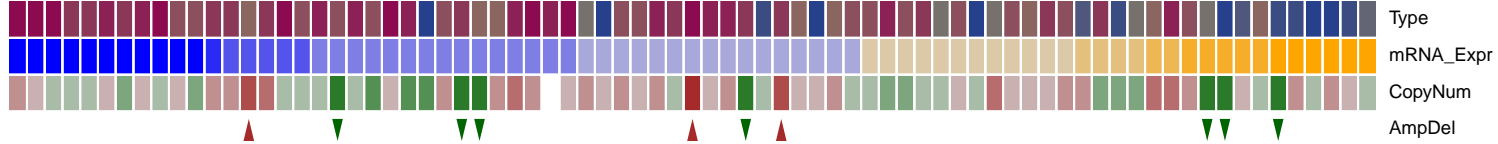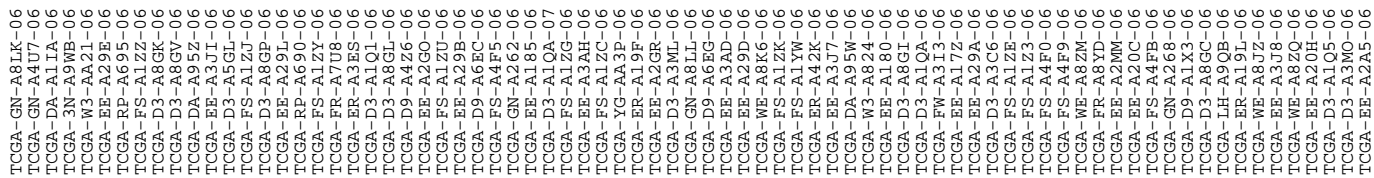

# LTBP2

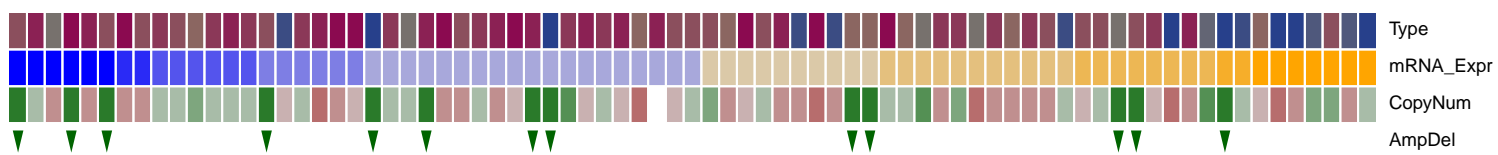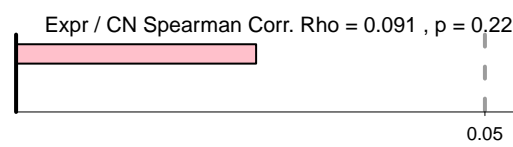

14 : 75079986  
 14 : 75079491  
 14 : 75079333  
 14 : 75079321  
 14 : 75079312  
 14 : 75079121  
 14 : 75079072  
 14 : 75078842  
 14 : 75078834  
 14 : 75078611  
 14 : 75078283  
 14 : 75077385  
 14 : 75075712  
 14 : 75072120  
 14 : 75070395  
 14 : 75061268  
 14 : 75056479  
 14 : 75053567  
 14 : 75052737  
 14 : 75052717  
 14 : 75052677  
 14 : 75052674  
 14 : 75052601  
 14 : 75050864  
 14 : 75043777  
 14 : 75039090  
 14 : 75034677  
 14 : 75018906  
 14 : 74992018  
 14 : 74982655  
 14 : 74978020  
 14 : 74975983  
 14 : 74970002  
 14 : 74968209

GeneLoc  
 PromoterAssoc  
 CpGIsland

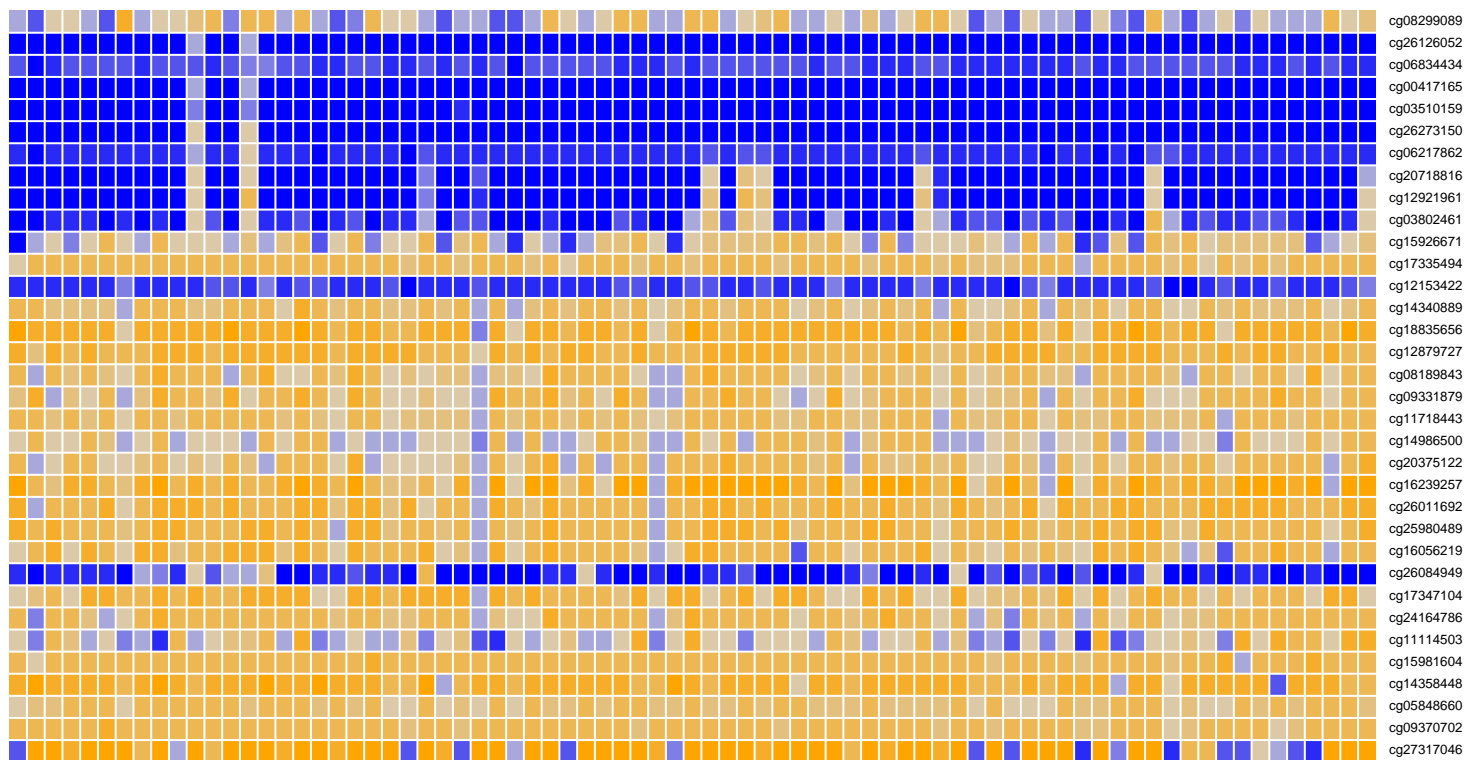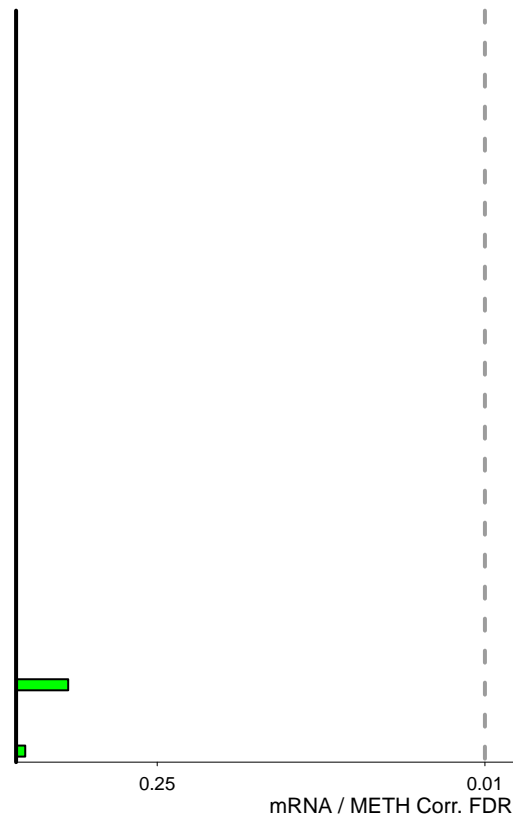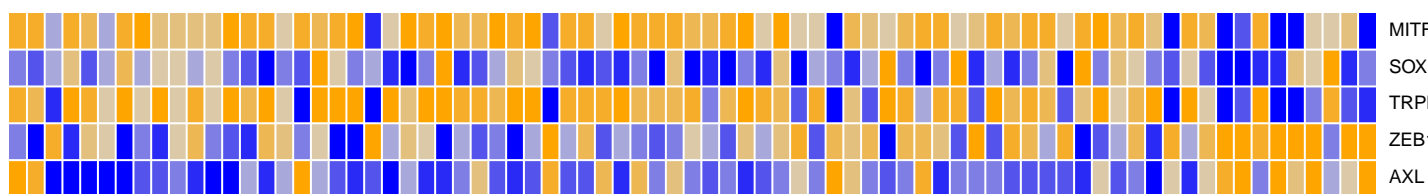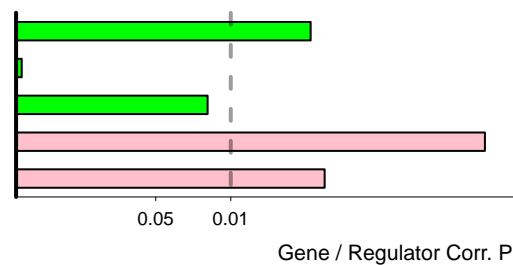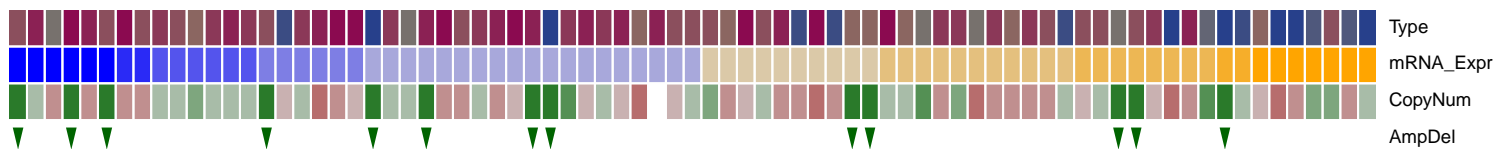

TCGA-D3-A1Q1-06  
 TCGA-EE-A29E-06  
 TCGA-EE-A20C-06  
 TCGA-GN-A8LK-06  
 TCGA-GN-A262-06  
 TCGA-D3-A8GV-06  
 TCGA-EE-A29L-06  
 TCGA-EE-A29B-06  
 TCGA-FS-A1ZU-06  
 TCGA-EE-A3J7-06  
 TCGA-D3-A8GP-06  
 TCGA-ER-A3ES-06  
 TCGA-EE-A3TI-06  
 TCGA-FS-A4F9-06  
 TCGA-D3-A3MO-06  
 TCGA-D3-A3ML-06  
 TCGA-FS-A1ZY-06  
 TCGA-EE-A185-06  
 TCGA-FS-A1ZG-06  
 TCGA-ER-A4ZK-06  
 TCGA-W3-AA21-06  
 TCGA-FW-A3I3-06  
 TCGA-GN-A268-06  
 TCGA-GN-A8LL-06  
 TCGA-FR-A708-06  
 TCGA-D3-A1QA-06  
 TCGA-EE-A2GR-06  
 TCGA-GN-AAU7-06  
 TCGA-D9-AAZ6-06  
 TCGA-LH-A9QB-06  
 TCGA-FS-A1ZK-06  
 TCGA-3N-A9WB-06  
 TCGA-D9-A6EG-06  
 TCGA-D9-A6EC-06  
 TCGA-D3-A1QA-07  
 TCGA-ER-A19F-06  
 TCGA-W3-A824-06  
 TCGA-DA-A95Z-06  
 TCGA-FS-A1ZJ-06  
 TCGA-DA-A95W-06  
 TCGA-EE-A180-06  
 TCGA-EE-A3J8-06  
 TCGA-D3-A8GK-06  
 TCGA-EE-A2MM-06  
 TCGA-WE-A8JZ-06  
 TCGA-FS-A4F5-06  
 TCGA-DA-A1IA-06  
 TCGA-FS-A1Z3-06  
 TCGA-D3-A8GC-06  
 TCGA-FR-A8LD-06  
 TCGA-D3-A3C6-06  
 TCGA-RP-A695-06  
 TCGA-FS-A4FB-06  
 TCGA-EE-A29D-06  
 TCGA-D9-A1X3-06  
 TCGA-WE-A8ZQ-06  
 TCGA-EE-A17Z-06  
 TCGA-RP-A690-06  
 TCGA-EE-A3AH-06  
 TCGA-FS-A1ZE-06  
 TCGA-FS-A4F0-06  
 TCGA-EE-A20H-06  
 TCGA-EE-A3AD-06  
 TCGA-EE-A2A5-06  
 TCGA-FS-A1ZC-06  
 TCGA-WE-A8K6-06  
 TCGA-FS-A1YW-06  
 TCGA-EE-A2GO-06  
 TCGA-D3-A1O5-06  
 TCGA-WE-A8ZM-06  
 TCGA-D3-A8GI-06  
 TCGA-ER-A19L-06  
 TCGA-EE-A29A-06



# PLAU

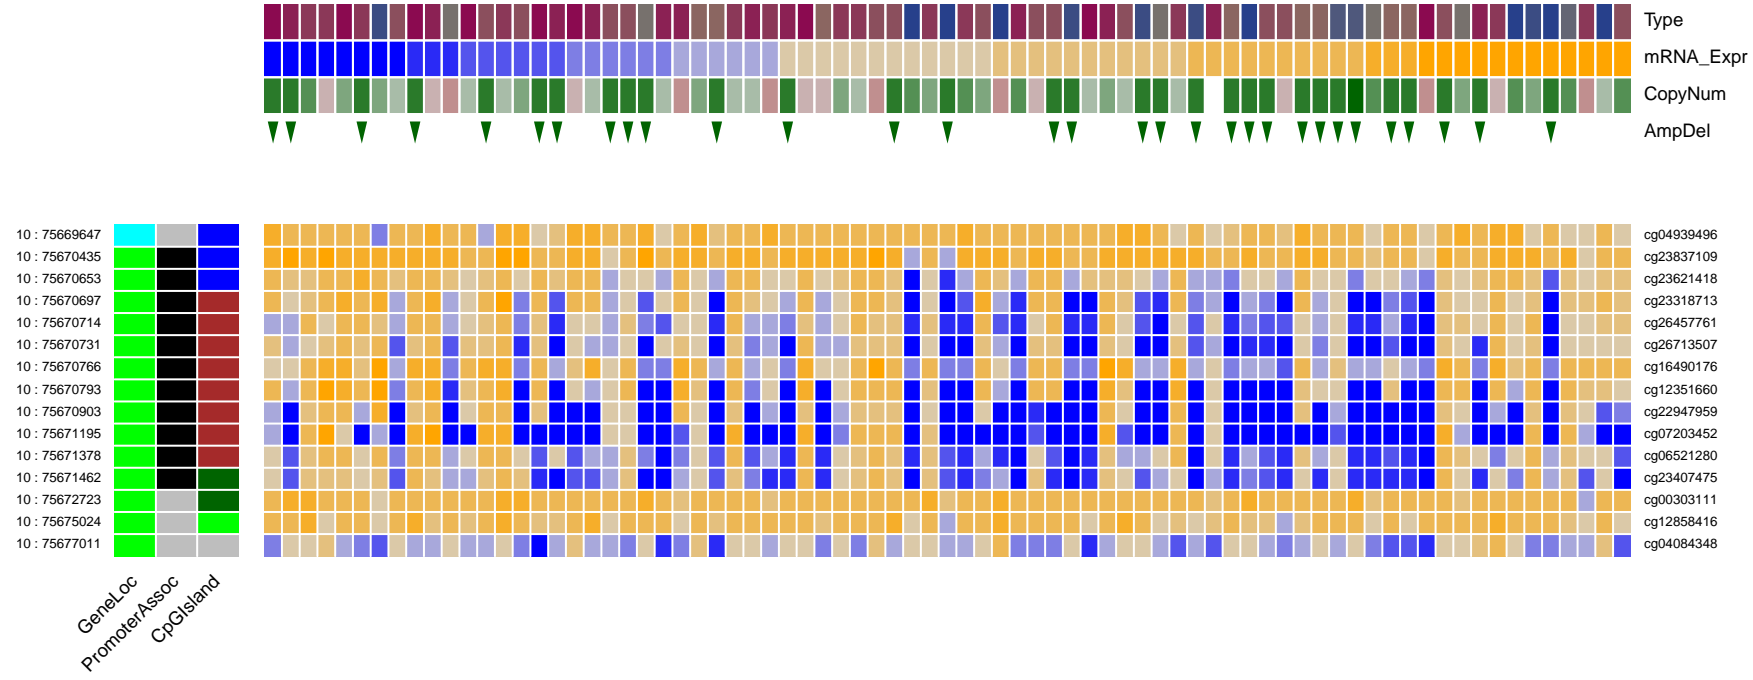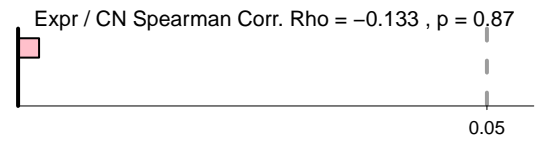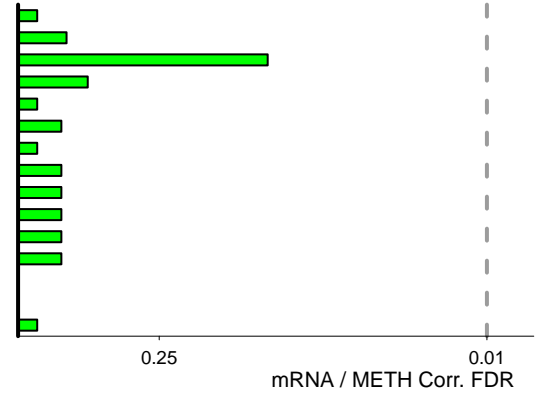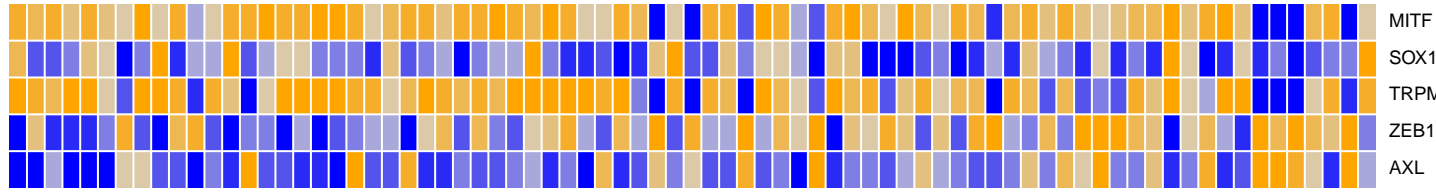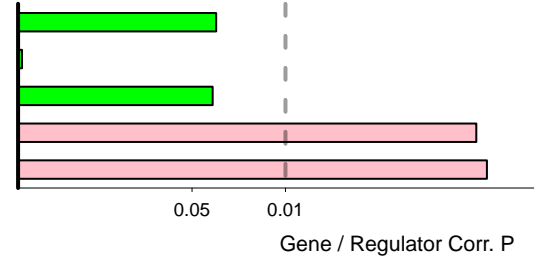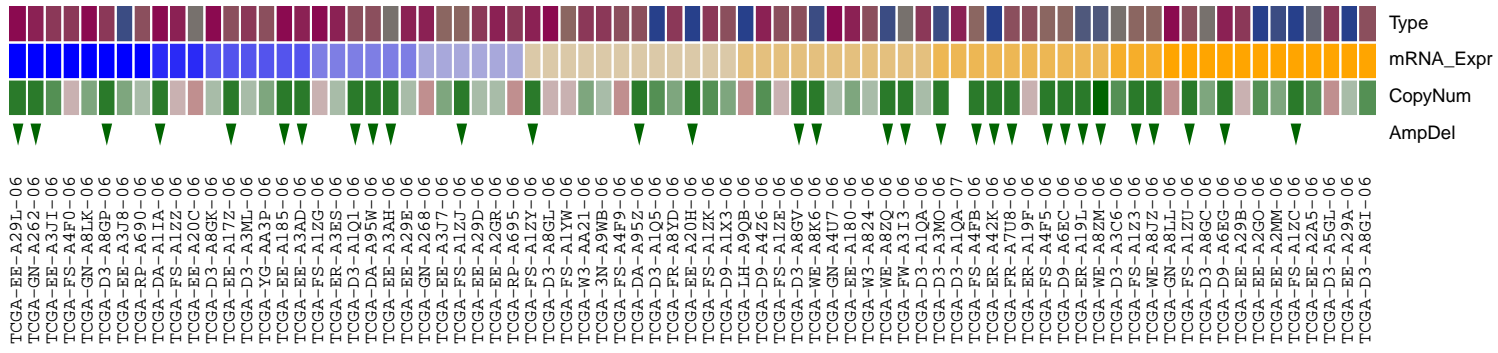

# ADAM12

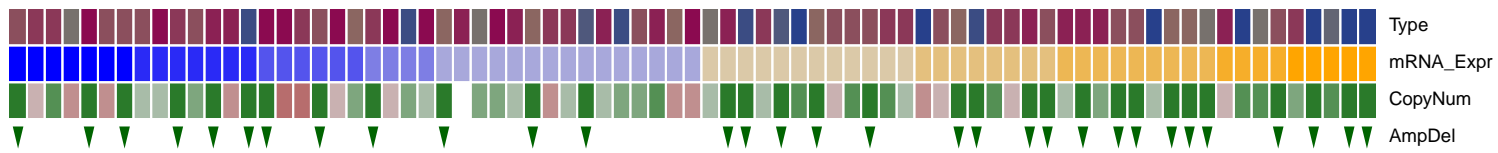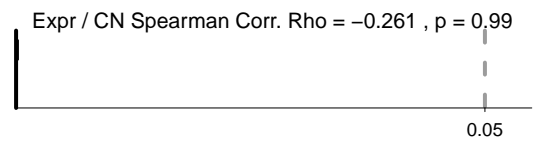

- 10 : 128077376
- 10 : 128077369
- 10 : 128077323
- 10 : 128077318
- 10 : 128077315
- 10 : 128077307
- 10 : 128077080
- 10 : 128076941
- 10 : 128076936
- 10 : 128076910
- 10 : 128076308
- 10 : 128076260
- 10 : 128075923
- 10 : 128075852
- 10 : 128074961
- 10 : 128061835
- 10 : 128039279
- 10 : 128021421
- 10 : 128021359
- 10 : 128021322
- 10 : 128014684
- 10 : 127999713
- 10 : 127991159
- 10 : 127966455
- 10 : 127941989
- 10 : 127916927
- 10 : 127914098
- 10 : 127914071
- 10 : 127904472
- 10 : 127897162
- 10 : 127888073
- 10 : 127867337
- 10 : 127864751
- 10 : 127836603
- 10 : 127824504
- 10 : 127823065
- 10 : 127812674
- 10 : 127789788
- 10 : 127769903
- 10 : 127769491
- 10 : 127750970
- 10 : 127738328
- 10 : 127730564
- 10 : 127705143
- 10 : 127702584

GeneLoc  
PromoterAssoc  
CpGIsland

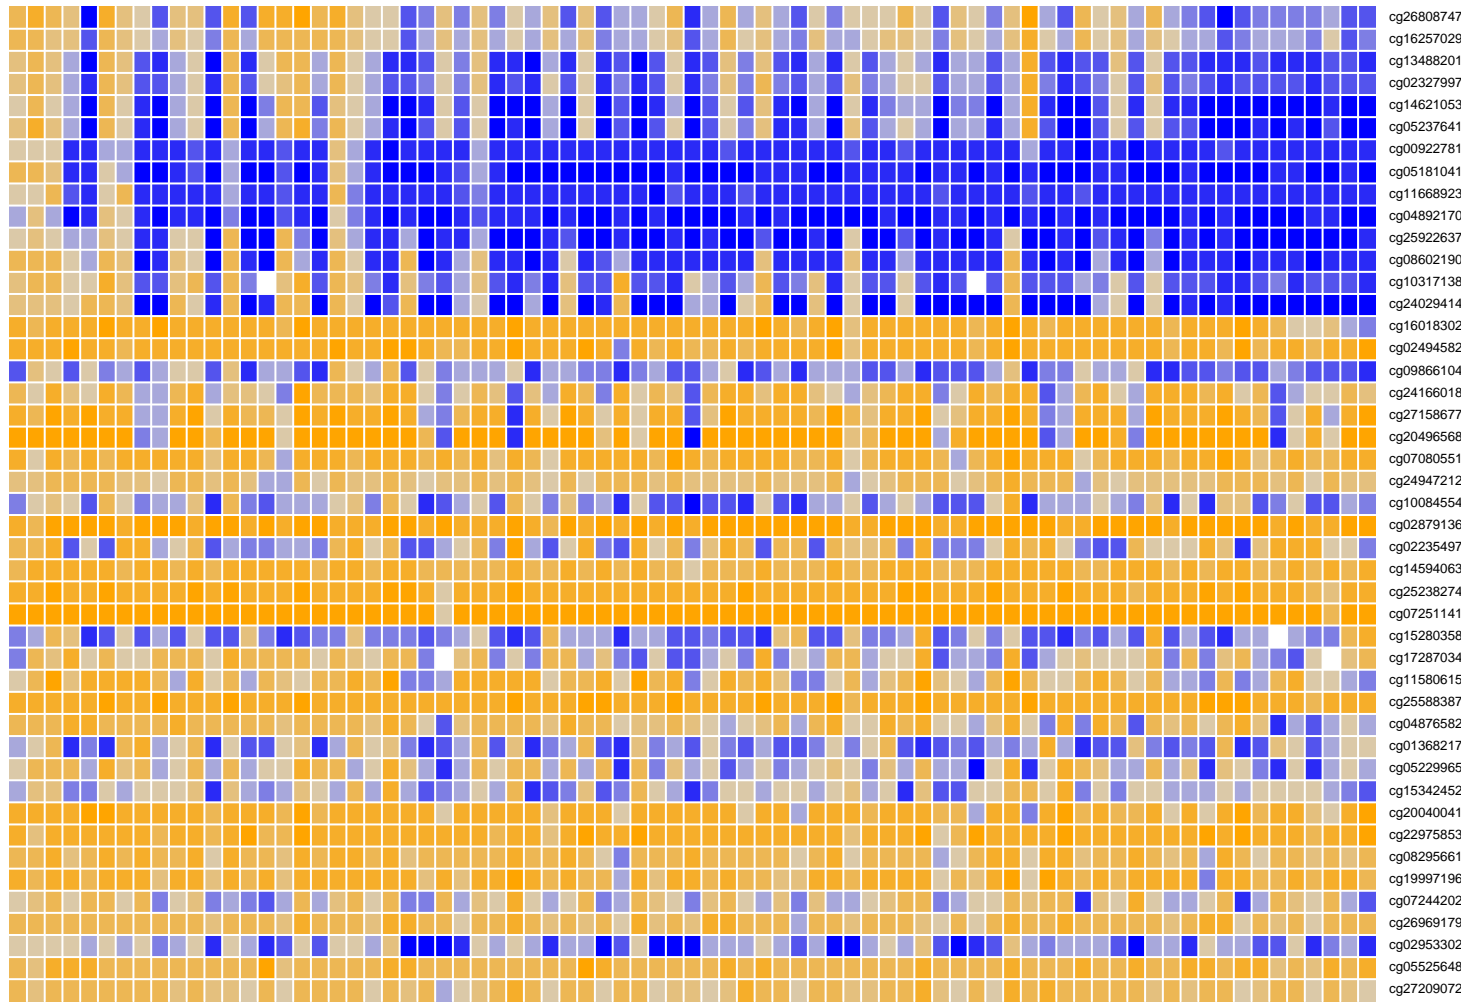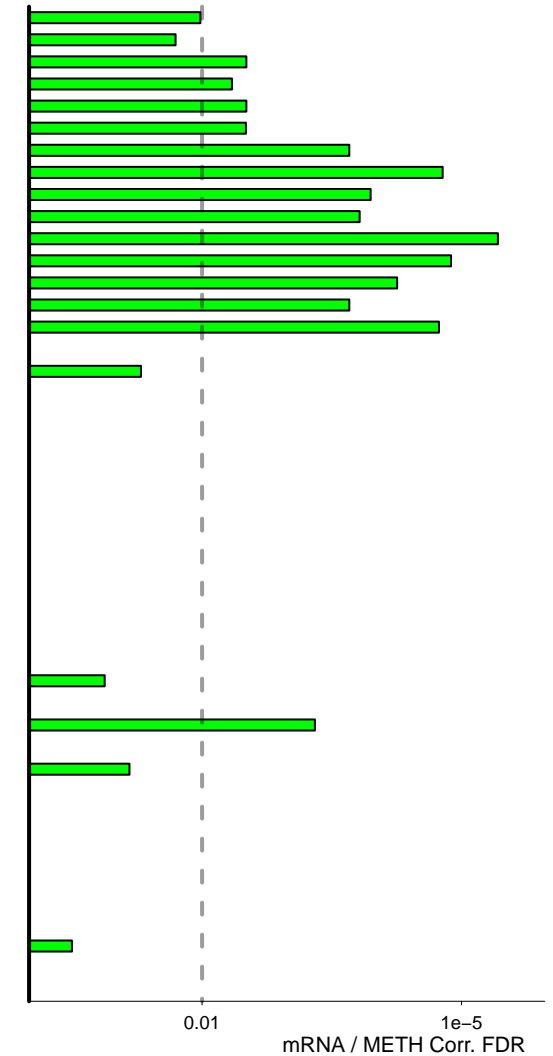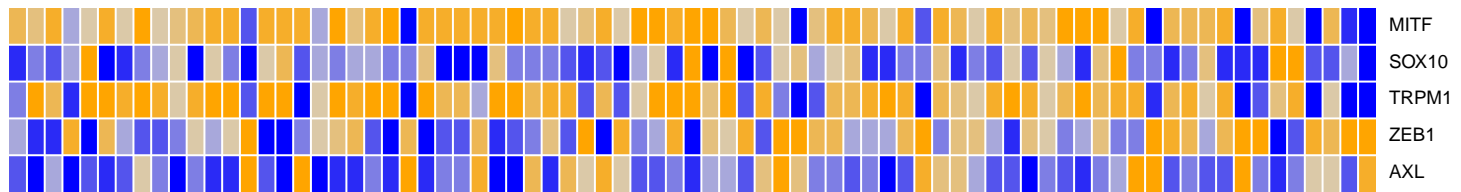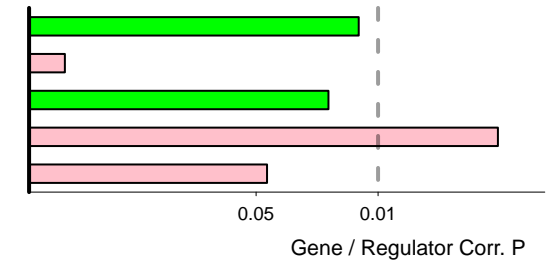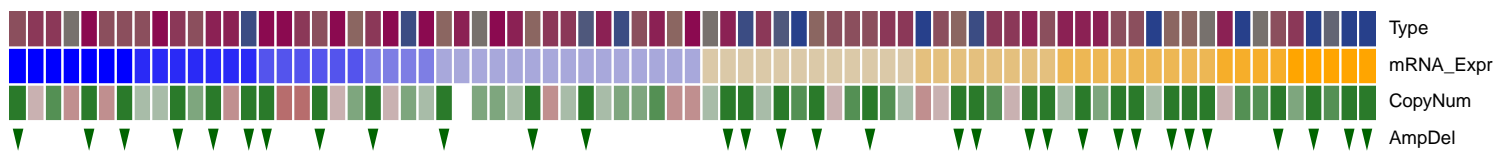

- TCGA-DA-A95Z-06
- TCGA-FS-A4F0-06
- TCGA-EE-A3JI-06
- TCGA-EE-A20C-06
- TCGA-DA-A1IA-06
- TCGA-FS-A4F9-06
- TCGA-DA-A95W-06
- TCGA-EP-A690-06
- TCGA-D3-A8GK-06
- TCGA-W3-A824-06
- TCGA-EP-A3AD-06
- TCGA-GN-A268-06
- TCGA-WE-A8K6-06
- TCGA-EE-A185-06
- TCGA-EP-A29L-06
- TCGA-D3-A3ML-06
- TCGA-D3-A8CV-06
- TCGA-D3-A6GL-06
- TCGA-EP-A3U7-06
- TCGA-EP-A695-06
- TCGA-FS-A1ZG-06
- TCGA-EE-A2MM-06
- TCGA-GN-A4U7-06
- TCGA-FS-A1ZJ-06
- TCGA-D3-A1QA-07
- TCGA-D3-A8GC-06
- TCGA-GN-A8LK-06
- TCGA-ER-A3ES-06
- TCGA-D9-A6EC-06
- TCGA-D3-A5GL-06
- TCGA-3N-A9WB-06
- TCGA-ER-A19L-06
- TCGA-EE-A29E-06
- TCGA-EE-A3J8-06
- TCGA-YG-AA3P-06
- TCGA-D9-A4Z6-06
- TCGA-FS-A1YW-06
- TCGA-GN-A8LL-06
- TCGA-FW-A3I3-06
- TCGA-FS-A1ZY-06
- TCGA-WE-A8Z0-06
- TCGA-D3-A1QA-06
- TCGA-WE-A8ZM-06
- TCGA-D3-A1O5-06
- TCGA-FS-A4F5-06
- TCGA-FS-A1ZE-06
- TCGA-D9-A1X3-06
- TCGA-EP-A7U8-06
- TCGA-W3-A42L-06
- TCGA-EE-A29D-06
- TCGA-LR-A3QB-06
- TCGA-ER-A19F-06
- TCGA-WE-A6JZ-06
- TCGA-D3-A3MO-06
- TCGA-FS-A1ZK-06
- TCGA-EE-A29B-06
- TCGA-GN-A262-06
- TCGA-FS-A1ZU-06
- TCGA-EE-A2GR-06
- TCGA-D9-A6EG-06
- TCGA-EE-A180-06
- TCGA-D3-A8GI-06
- TCGA-EE-A29A-06
- TCGA-EE-A29A-06
- TCGA-FS-A4FB-06
- TCGA-FS-A1Z3-06
- TCGA-EE-A3AH-06
- TCGA-FS-A1ZZ-06
- TCGA-EE-A2GO-06
- TCGA-D3-A3C6-06
- TCGA-EE-A17Z-06
- TCGA-EP-A8YD-06
- TCGA-EP-A20H-06
- TCGA-EP-A2A5-06
- TCGA-EP-A42K-06
- TCGA-FS-A1ZC-06

# SDC4

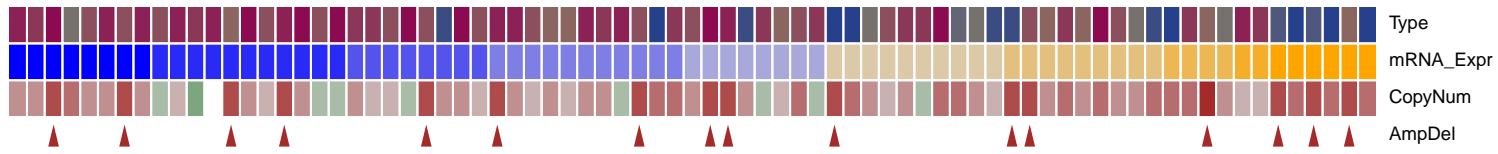

20 : 43977473  
 20 : 43977423  
 20 : 43977232  
 20 : 43977199  
 20 : 43977080  
 20 : 43977078  
 20 : 43977046  
 20 : 43976933  
 20 : 43976709  
 20 : 43975752  
 20 : 43973322  
 20 : 43954866

GeneLoc  
 PromoterAssoc  
 CpGIsland

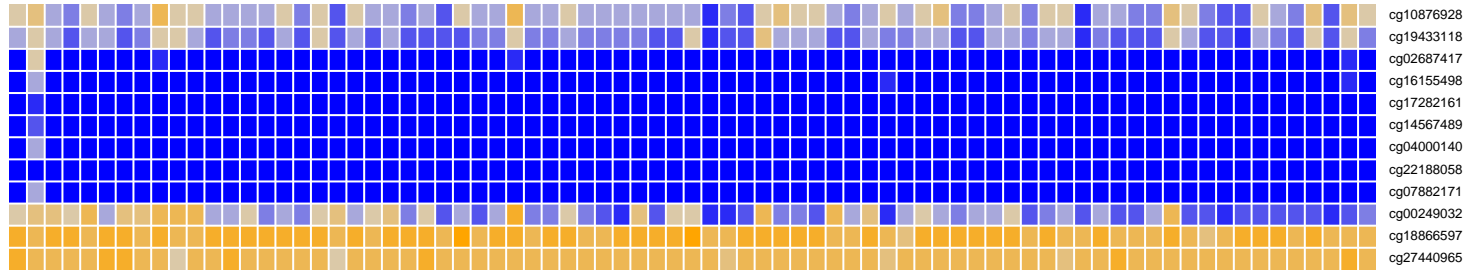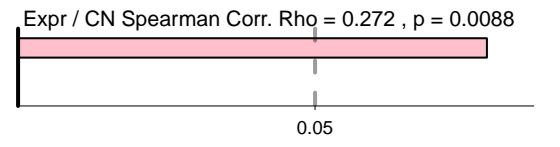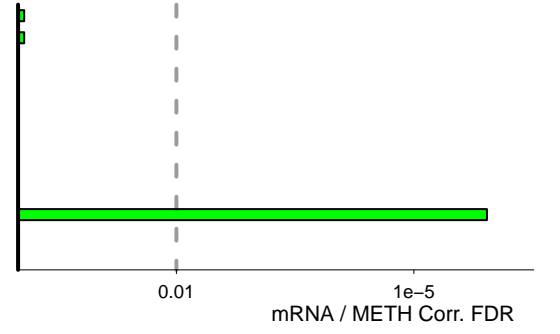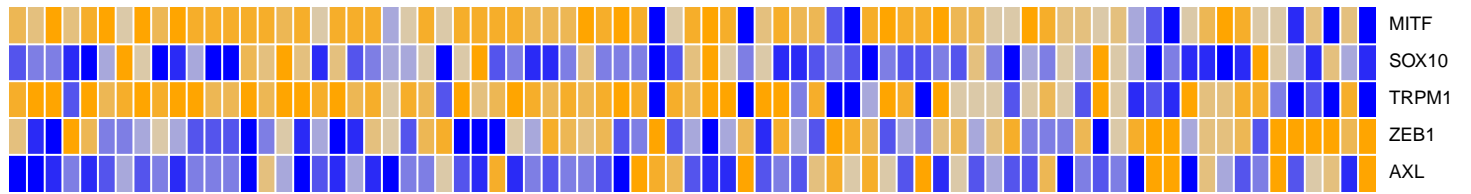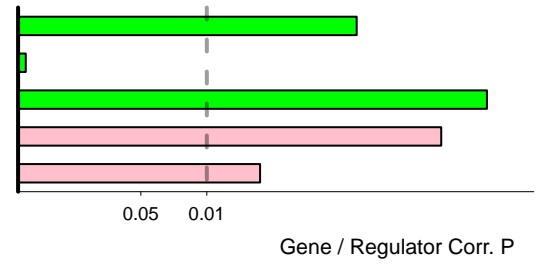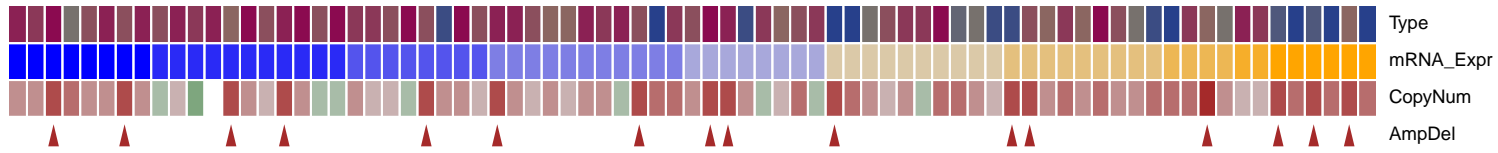

TCGA-GN-A262-06  
 TCGA-FS-A4F0-06  
 TCGA-FS-A1ZG-06  
 TCGA-D3-A3C6-06  
 TCGA-FS-A4F9-06  
 TCGA-EE-A2GR-06  
 TCGA-D3-A8G1-06  
 TCGA-D9-A4Z6-06  
 TCGA-W3-A824-06  
 TCGA-D9-A6EG-06  
 TCGA-EP-A695-06  
 TCGA-D3-A1O8-07  
 TCGA-FS-A1ZU-06  
 TCGA-EE-A29V-06  
 TCGA-EP-A19F-06  
 TCGA-FS-A1ZY-06  
 TCGA-GN-A8LK-06  
 TCGA-GN-A95W-06  
 TCGA-GN-A4U7-06  
 TCGA-EE-A3JI-06  
 TCGA-D3-A5GL-06  
 TCGA-D3-A8GV-06  
 TCGA-D3-A8GK-06  
 TCGA-FS-A1ZE-06  
 TCGA-EE-A3J8-06  
 TCGA-EE-A185-06  
 TCGA-EE-A17Z-06  
 TCGA-EE-A29E-06  
 TCGA-GN-A268-06  
 TCGA-FR-A7U8-06  
 TCGA-FS-A4FB-06  
 TCGA-FS-A1Z3-06  
 TCGA-EE-A180-06  
 TCGA-EE-A29D-06  
 TCGA-ER-A3ES-06  
 TCGA-D3-A1Q1-06  
 TCGA-FS-A1ZC-06  
 TCGA-3N-A9WB-06  
 TCGA-D9-A1X3-06  
 TCGA-GN-A8LI-06  
 TCGA-EE-A3AD-06  
 TCGA-EE-A2MN-06  
 TCGA-FS-A1YW-06  
 TCGA-DA-A95Z-06  
 TCGA-D3-A1O8-06  
 TCGA-LH-A9OB-06  
 TCGA-EE-A20H-06  
 TCGA-D3-A8GC-06  
 TCGA-EP-A690-06  
 TCGA-FS-A1ZK-06  
 TCGA-D3-A3ML-06  
 TCGA-D3-A8GL-06  
 TCGA-EE-A2A5-06  
 TCGA-EE-A3AH-06  
 TCGA-D3-A3MO-06  
 TCGA-WE-A8ZQ-06  
 TCGA-YG-AA3P-06  
 TCGA-D9-A6EC-06  
 TCGA-D3-A8GP-06  
 TCGA-FS-A4F5-06  
 TCGA-DA-A1IA-06  
 TCGA-FS-A1ZU-06  
 TCGA-EE-A20C-06  
 TCGA-WE-A8K6-06  
 TCGA-EE-A29A-06  
 TCGA-W3-AA21-06  
 TCGA-WE-A8JZ-06  
 TCGA-FW-A3I3-06  
 TCGA-FS-A1ZZ-06  
 TCGA-FR-A8YD-06  
 TCGA-WE-A8ZM-06  
 TCGA-ER-A42K-06  
 TCGA-ER-A191-06  
 TCGA-D3-A1O5-06  
 TCGA-EE-A3J7-06  
 TCGA-EE-A2GO-06

# GLIPR1

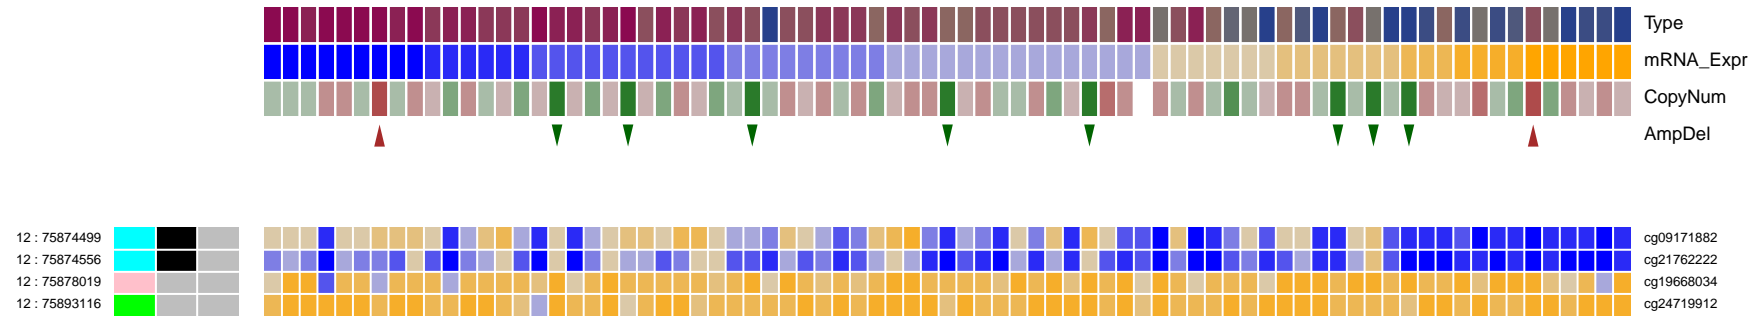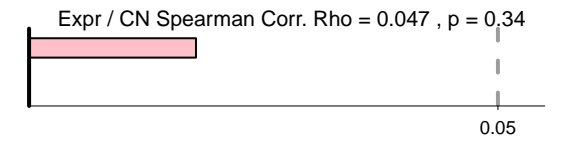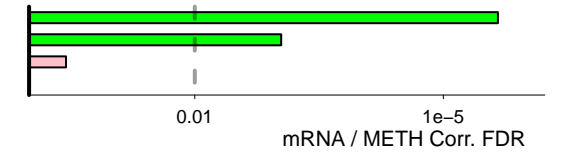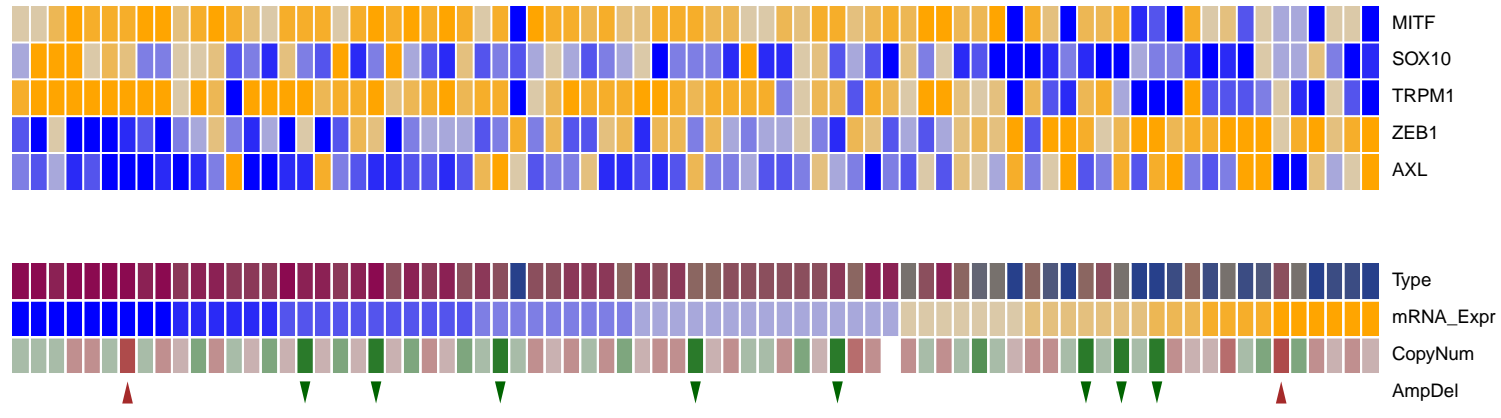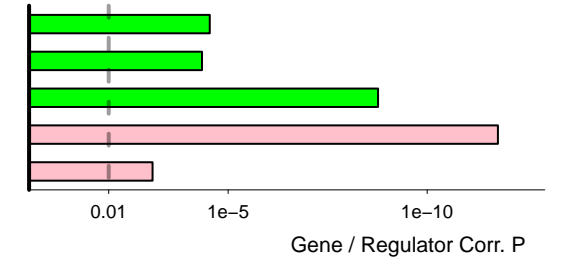

TCGA-D3-A8GK-06  
 TCGA-DA-A1IA-06  
 TCGA-FS-A1ZY-06  
 TCGA-GN-A8LL-06  
 TCGA-EE-A185-06  
 TCGA-EE-A29L-06  
 TCGA-GN-A8LK-06  
 TCGA-ER-A3ES-06  
 TCGA-FS-A1ZG-06  
 TCGA-D3-A8GP-06  
 TCGA-EE-A3AD-06  
 TCGA-EE-A180-06  
 TCGA-D3-A3WL-06  
 TCGA-FS-A4F0-06  
 TCGA-W3-A421-06  
 TCGA-GN-A4U7-06  
 TCGA-GN-A368-06  
 TCGA-EE-A39E-06  
 TCGA-FR-A6JD-06  
 TCGA-FS-A1ZZ-06  
 TCGA-D3-A8GL-06  
 TCGA-EE-A17Z-06  
 TCGA-EE-A2GR-06  
 TCGA-FS-A1ZK-06  
 TCGA-D9-A6EG-06  
 TCGA-D9-A1X3-06  
 TCGA-3N-A9WB-06  
 TCGA-EE-A1Q1-06  
 TCGA-EE-A20H-06  
 TCGA-YG-AA3P-06  
 TCGA-FS-A1ZE-06  
 TCGA-PP-A695-06  
 TCGA-D3-A1QA-06  
 TCGA-D3-A5GL-06  
 TCGA-EE-A3J7-06  
 TCGA-EE-A29B-06  
 TCGA-FS-A4F9-06  
 TCGA-EE-A29D-06  
 TCGA-D9-A6EC-06  
 TCGA-FS-A1Z3-06  
 TCGA-FR-A7U8-06  
 TCGA-D3-A8GI-06  
 TCGA-DA-A95W-06  
 TCGA-DA-A95Z-06  
 TCGA-FS-A1ZU-06  
 TCGA-ER-A19F-06  
 TCGA-EE-A3TI-06  
 TCGA-FS-A4F5-06  
 TCGA-GN-A362-06  
 TCGA-D3-A1QA-07  
 TCGA-EE-A3AH-06  
 TCGA-RE-A69U-06  
 TCGA-D9-A4Z6-06  
 TCGA-WE-A6JZ-06  
 TCGA-EE-A2A5-06  
 TCGA-FW-A3I3-06  
 TCGA-FS-A1ZC-06  
 TCGA-FS-A1ZJ-06  
 TCGA-ER-A19L-06  
 TCGA-EE-A29A-06  
 TCGA-FS-A4FB-06  
 TCGA-W3-A824-06  
 TCGA-D3-A8GC-06  
 TCGA-ER-A4ZK-06  
 TCGA-LH-A9QB-06  
 TCGA-EE-A2MM-06  
 TCGA-FS-A1YW-06  
 TCGA-WE-A8ZQ-06  
 TCGA-D3-A3C6-06  
 TCGA-WE-A8K6-06  
 TCGA-WE-A8ZM-06  
 TCGA-D3-A8GV-06  
 TCGA-EE-A20C-06  
 TCGA-D3-A1O5-06  
 TCGA-D3-A3MO-06  
 TCGA-EE-A3J8-06  
 TCGA-EE-A3GO-06

# NTN4

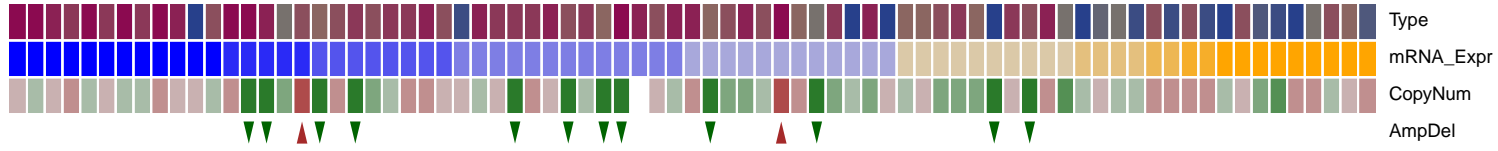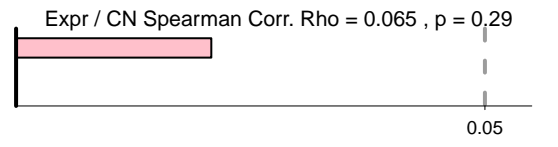

12 : 96185437  
 12 : 96185283  
 12 : 96184965  
 12 : 96184815  
 12 : 96184799  
 12 : 96184787  
 12 : 96184580  
 12 : 96184558  
 12 : 96184415  
 12 : 96184020  
 12 : 96183791  
 12 : 96183525  
 12 : 96183466  
 12 : 96183197  
 12 : 96180994  
 12 : 96177524  
 12 : 96161502  
 12 : 96158732  
 12 : 96127072  
 12 : 96113161  
 12 : 96099778  
 12 : 96069024  
 12 : 96052514

GeneLoc  
 PromoterAssoc  
 CpGIsland

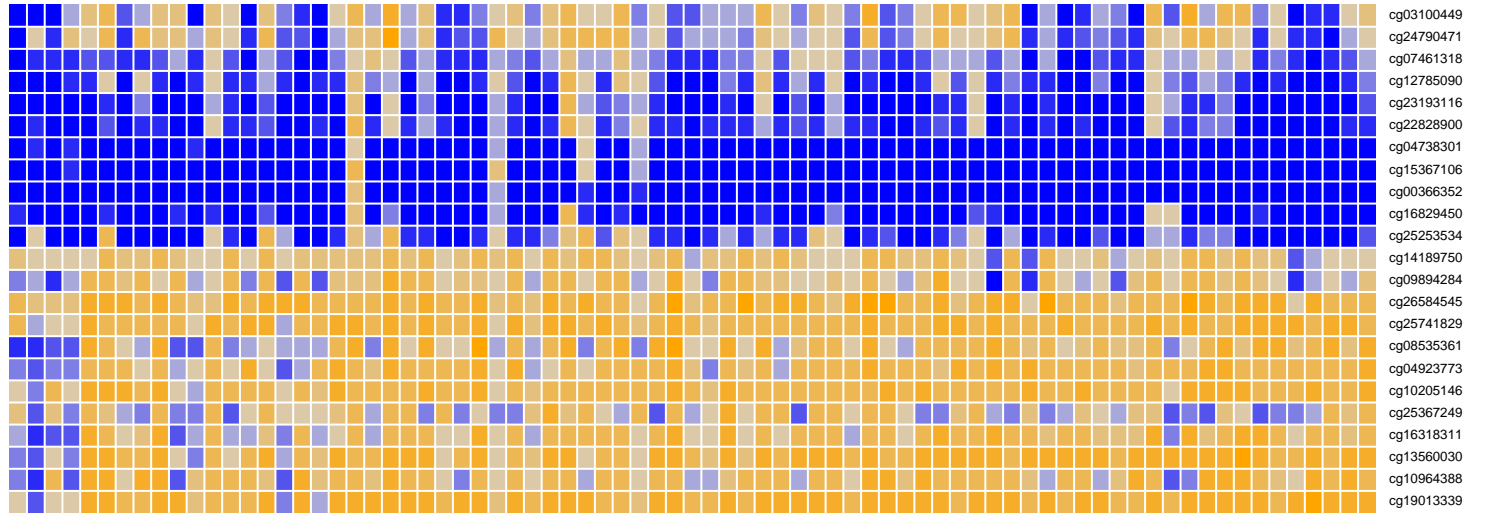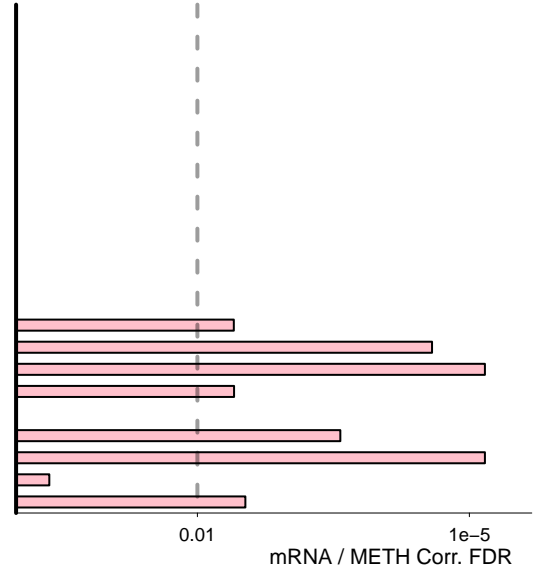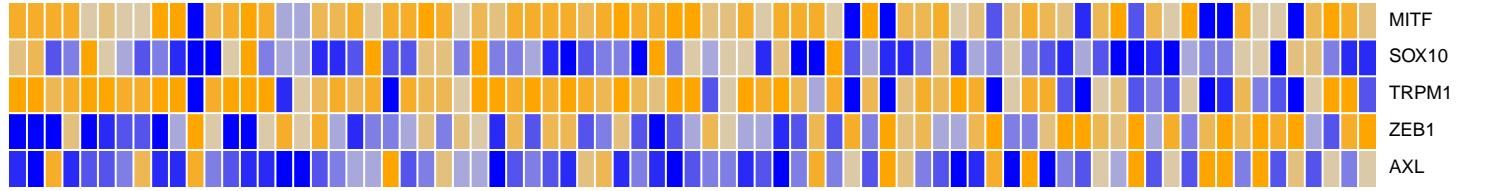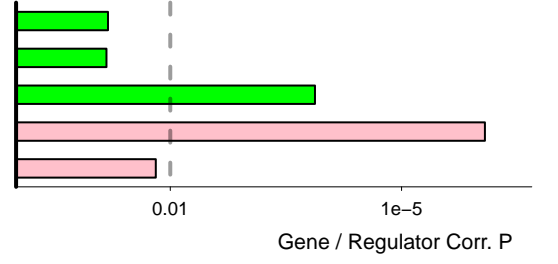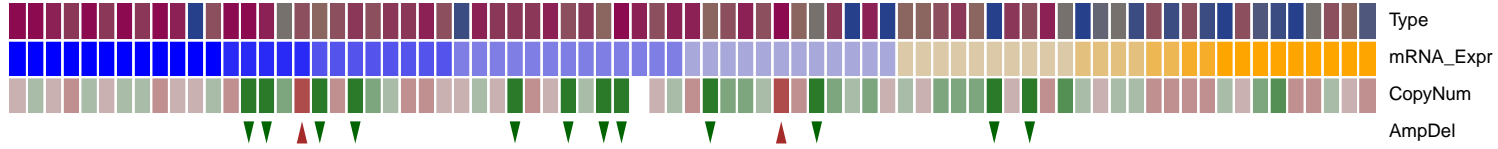

TCGA-GN-A4U7-06  
 TCGA-EE-A29L-06  
 TCGA-EE-A29E-06  
 TCGA-D3-A5GL-06  
 TCGA-DA-A1IA-06  
 TCGA-EE-A29B-06  
 TCGA-D3-A8GK-06  
 TCGA-3N-A9WB-06  
 TCGA-FS-A1ZG-06  
 TCGA-D9-A6EG-06  
 TCGA-FS-A1ZC-06  
 TCGA-W3-A824-06  
 TCGA-EE-A185-06  
 TCGA-GN-A8LI-06  
 TCGA-GN-A268-06  
 TCGA-EE-A20C-06  
 TCGA-D3-A8QV-06  
 TCGA-FS-A4PB-06  
 TCGA-FR-A7U8-06  
 TCGA-EE-A3J1-06  
 TCGA-D3-A8GL-06  
 TCGA-D3-A3ML-06  
 TCGA-FS-A1ZK-06  
 TCGA-EE-A180-06  
 TCGA-ER-A19F-06  
 TCGA-D3-A3MO-06  
 TCGA-FS-A1ZY-06  
 TCGA-EE-A29D-06  
 TCGA-RP-A695-06  
 TCGA-FS-A1ZZ-06  
 TCGA-FS-A4F9-06  
 TCGA-D3-A1QA-06  
 TCGA-D3-A8GL-06  
 TCGA-D3-A1QA-07  
 TCGA-EE-A17Z-06  
 TCGA-ER-A3ES-06  
 TCGA-D9-A4Z6-06  
 TCGA-FS-A4F5-06  
 TCGA-EE-A3AD-06  
 TCGA-DA-A95W-06  
 TCGA-GN-A8LK-06  
 TCGA-FS-A1ZJ-06  
 TCGA-D3-A8GC-06  
 TCGA-PR-A8YD-06  
 TCGA-EE-A20H-06  
 TCGA-EE-A2GR-06  
 TCGA-EE-A2GO-06  
 TCGA-WE-A8ZJ-06  
 TCGA-FS-A8ZJ-06  
 TCGA-FS-A1Z3-06  
 TCGA-D9-A1X3-06  
 TCGA-W3-AAZ1-06  
 TCGA-EE-A3J7-06  
 TCGA-LH-A9QB-06  
 TCGA-D3-A8GP-06  
 TCGA-D3-A1Q1-06  
 TCGA-GN-A262-06  
 TCGA-D3-A3C6-06  
 TCGA-ER-A42K-06  
 TCGA-EE-A2A5-06  
 TCGA-FW-A3I3-06  
 TCGA-WE-A8K6-06  
 TCGA-DA-A95Z-06  
 TCGA-EE-A3J8-06  
 TCGA-YG-AA3P-06  
 TCGA-EE-A2MM-06  
 TCGA-EE-A29A-06  
 TCGA-FS-A1ZE-06  
 TCGA-WE-A8ZM-06  
 TCGA-WE-A8ZQ-06  
 TCGA-D3-A1O5-06  
 TCGA-EE-A3AH-06  
 TCGA-RP-A690-06  
 TCGA-FS-A1YW-06  
 TCGA-ER-A19I-06

# TCF4

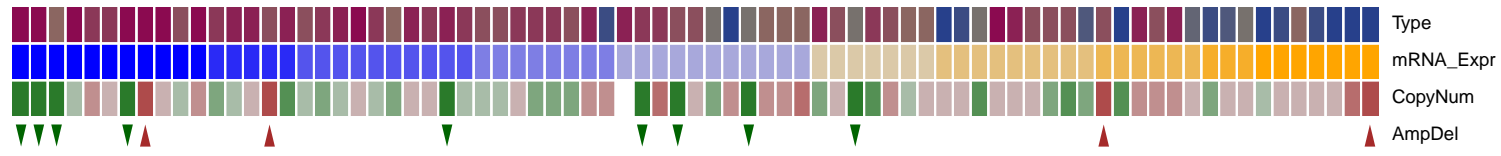

18 : 53260934  
 18 : 53257340  
 18 : 53257226  
 18 : 53257153  
 18 : 53257028  
 18 : 53257019  
 18 : 53255894  
 18 : 53255771  
 18 : 53255575  
 18 : 53255401  
 18 : 53255063  
 18 : 53254863  
 18 : 53172460  
 18 : 53171931  
 18 : 53068921  
 18 : 52989604  
 18 : 52989155  
 18 : 52989085  
 18 : 52901961  
 18 : 52891017

GeneLoc  
 PromoterAssoc  
 CpGIsland

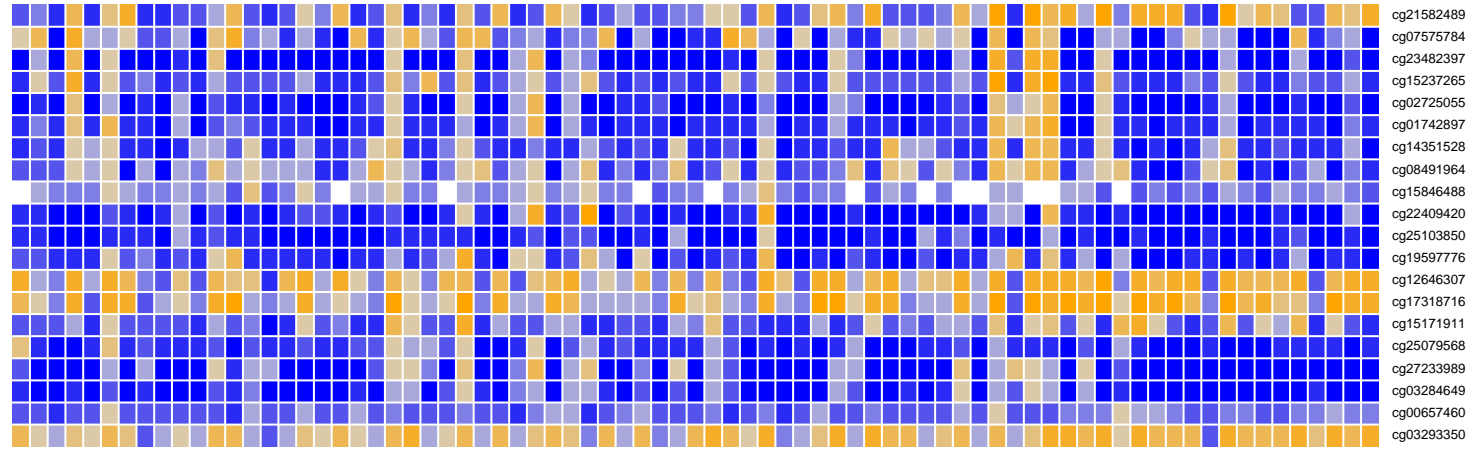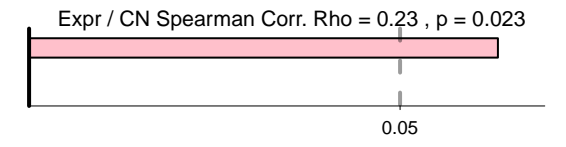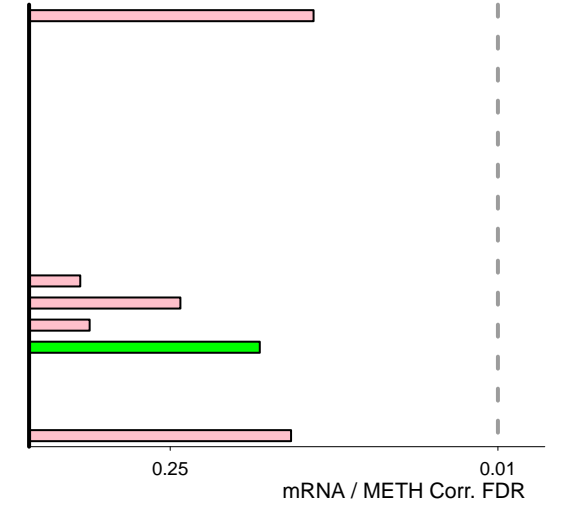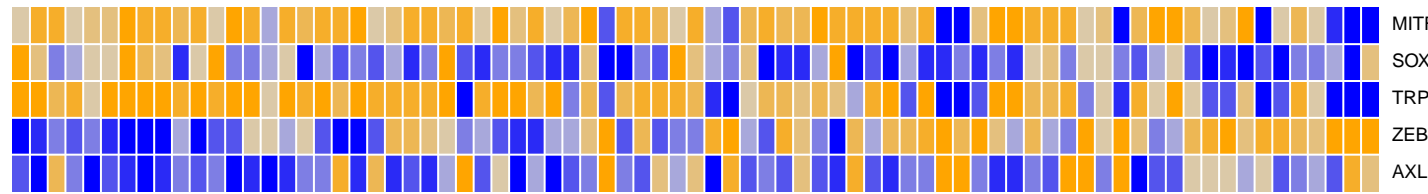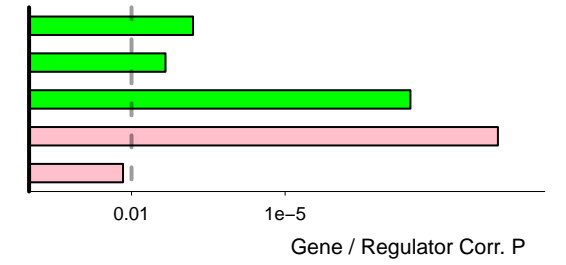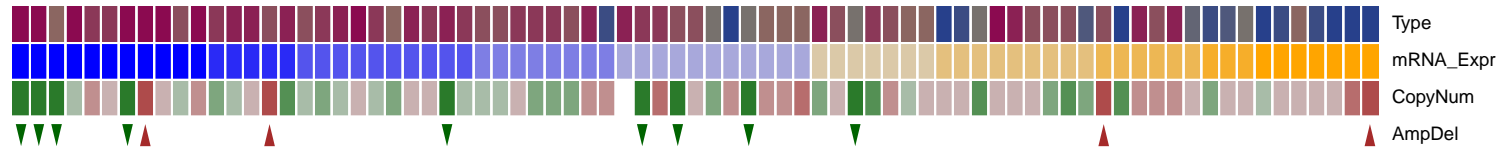

TCGA-DA-A11A-06  
 TCGA-GN-A8LK-06  
 TCGA-D9-A6EC-06  
 TCGA-D3-A8GK-06  
 TCGA-D3-A8GP-06  
 TCGA-EE-A29B-06  
 TCGA-GN-A8LL-06  
 TCGA-EE-A29L-06  
 TCGA-GN-A4U7-06  
 TCGA-FR-A7U8-06  
 TCGA-EE-A185-06  
 TCGA-FR-A8YD-06  
 TCGA-FR-A3FS-06  
 TCGA-GN-A268-06  
 TCGA-D3-A8GV-06  
 TCGA-EE-A3AD-06  
 TCGA-W3-A82A-06  
 TCGA-FR-A86F-06  
 TCGA-EE-A29E-06  
 TCGA-FS-A1ZG-06  
 TCGA-FS-A1ZJ-06  
 TCGA-EE-A3J7-06  
 TCGA-FS-A1ZV-06  
 TCGA-D3-A5GL-06  
 TCGA-FS-A1ZY-06  
 TCGA-D3-A3ML-06  
 TCGA-DA-A95W-06  
 TCGA-RP-A690-06  
 TCGA-FS-A4F0-06  
 TCGA-EE-A3JI-06  
 TCGA-W3-AA21-06  
 TCGA-DA-A95Z-06  
 TCGA-EE-A180-06  
 TCGA-WE-A8K6-06  
 TCGA-D3-A1QA-07  
 TCGA-EE-A29D-06  
 TCGA-D3-A1QA-06  
 TCGA-D3-A8GI-06  
 TCGA-ER-A19F-06  
 TCGA-EE-A20C-06  
 TCGA-LH-A9OB-06  
 TCGA-EE-A3AH-06  
 TCGA-FS-A1ZT-06  
 TCGA-FS-A4FB-06  
 TCGA-WE-A8JZ-06  
 TCGA-EE-A2GR-06  
 TCGA-EE-A17Z-06  
 TCGA-D3-A8GC-06  
 TCGA-FS-A1ZK-06  
 TCGA-FS-A4E9-06  
 TCGA-FS-A4E8-06  
 TCGA-FS-A1YH-06  
 TCGA-EE-A2GO-06  
 TCGA-EE-A2MM-06  
 TCGA-D3-A3C6-06  
 TCGA-D3-A8GL-06  
 TCGA-D9-A6EG-06  
 TCGA-FS-A1ZE-06  
 TCGA-D9-A1X3-06  
 TCGA-D3-A1Q1-06  
 TCGA-WE-A8ZM-06  
 TCGA-FS-A1ZU-06  
 TCGA-EE-A29A-06  
 TCGA-GN-A262-06  
 TCGA-D9-AA3P-06  
 TCGA-YG-AA3P-06  
 TCGA-EE-A2A5-06  
 TCGA-EE-A3J8-06  
 TCGA-ER-A19L-06  
 TCGA-FW-A3I3-06  
 TCGA-EE-A20H-06  
 TCGA-WE-A8ZQ-06  
 TCGA-FS-A1Z3-06  
 TCGA-D3-A3MO-06  
 TCGA-ER-A42K-06  
 TCGA-FS-A1ZC-06  
 TCGA-D3-A1Q5-06

# EPHA2

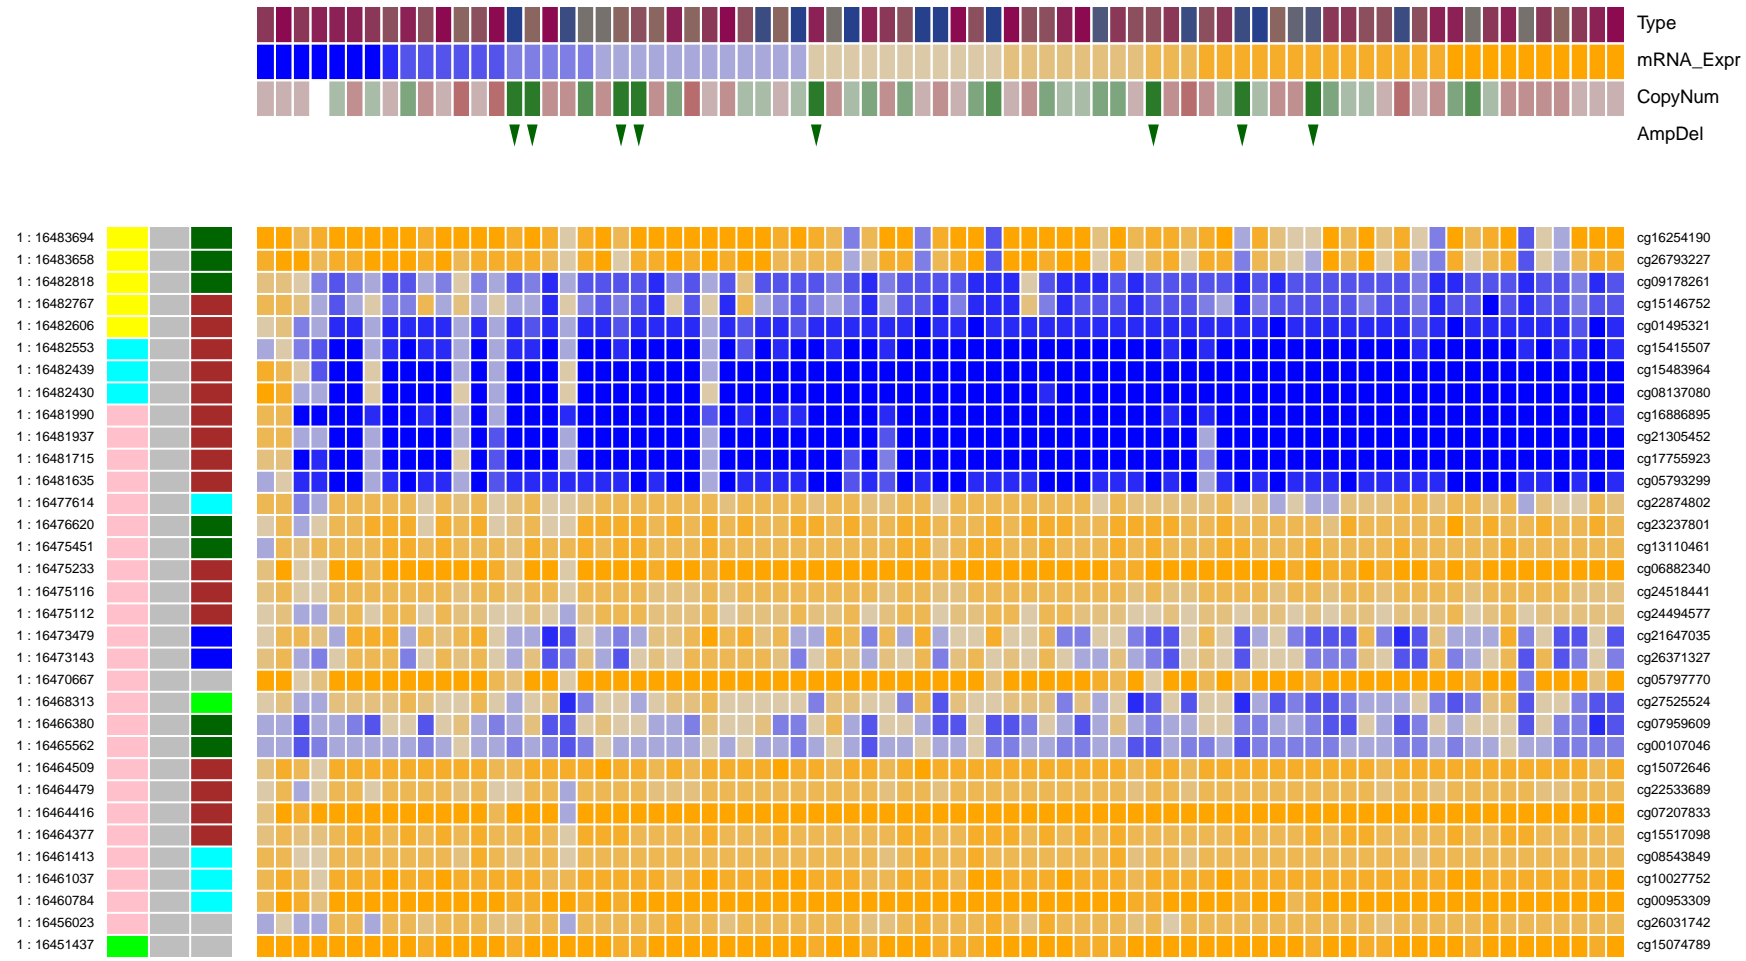

GeneLoc  
 PromoterAssoc  
 CpGIsland

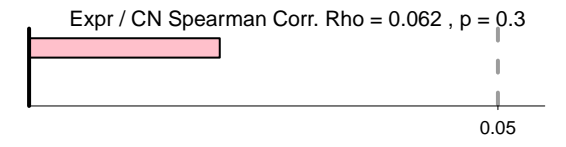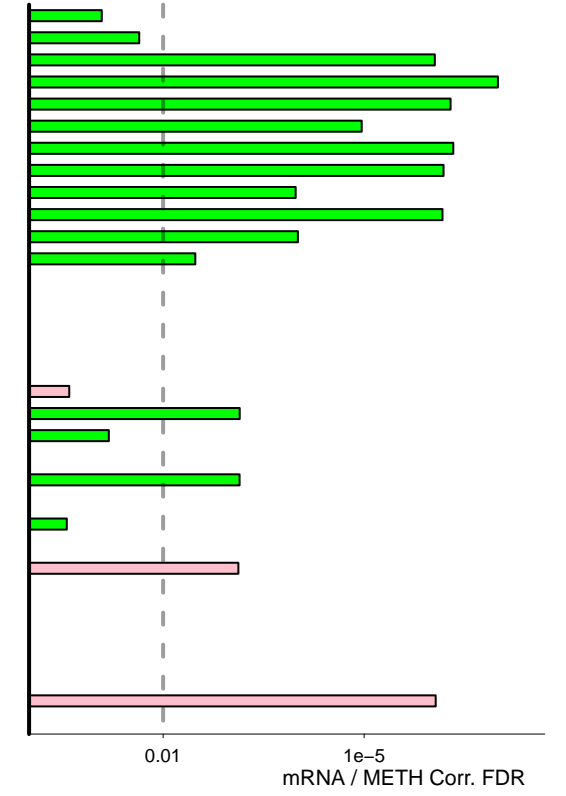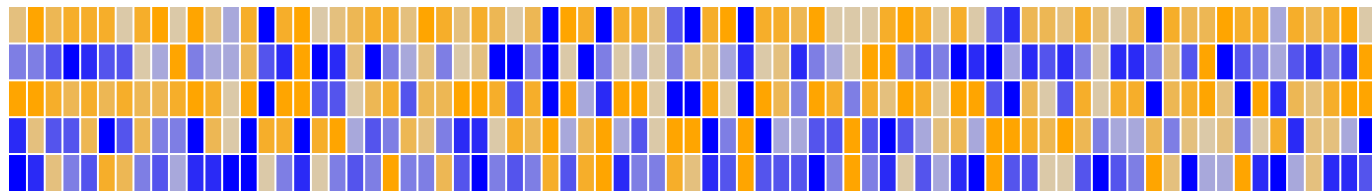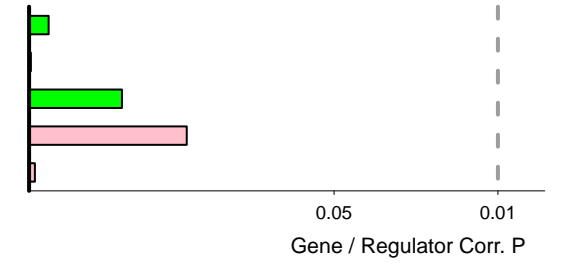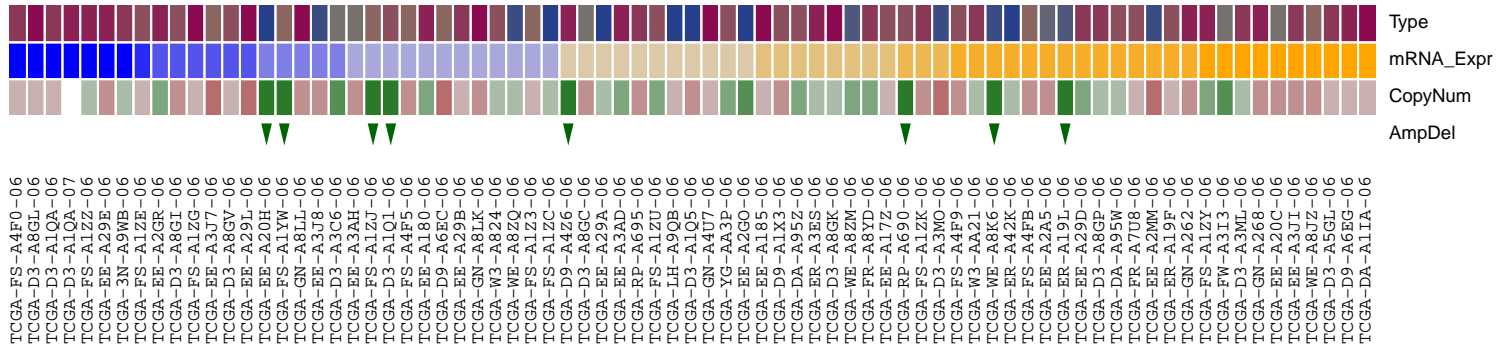

# GBP3

1 : 89488430  
 1 : 89473148

GeneLoc  
 PromoterAssoc  
 CpGIsland

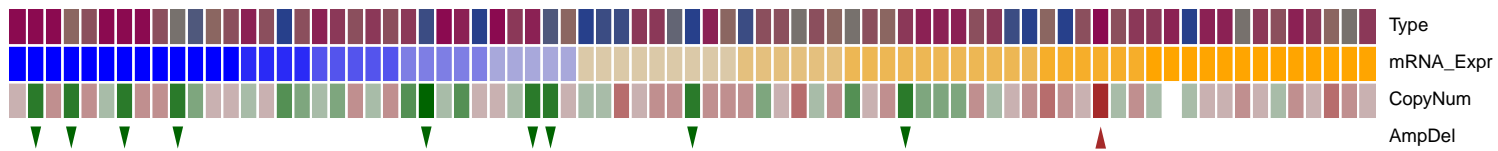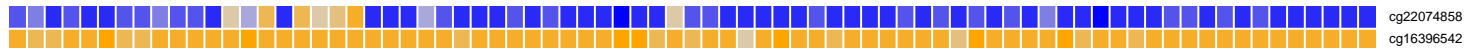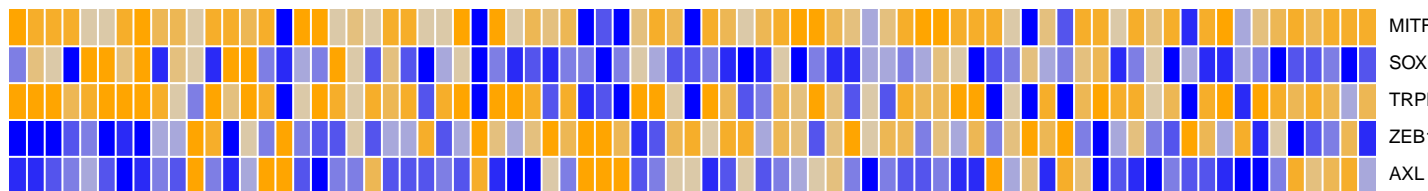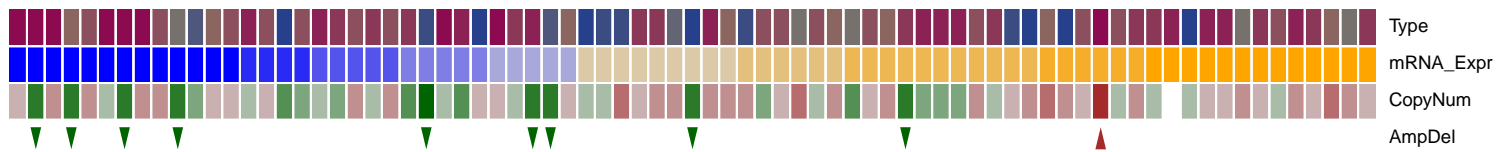

TCGA-FS-A1ZG-06  
 TCGA-GN-A4U7-06  
 TCGA-EE-A185-06  
 TCGA-FS-A1ZJ-06  
 TCGA-D3-A8GI-06  
 TCGA-DA-A1IA-06  
 TCGA-GN-A8LK-06  
 TCGA-GN-A8LJ-06  
 TCGA-FR-A7U8-06  
 TCGA-EE-A3AH-06  
 TCGA-WE-A8ZM-06  
 TCGA-FS-A1YW-06  
 TCGA-EE-A17Z-06  
 TCGA-FS-A1ZY-06  
 TCGA-D3-A1O1-06  
 TCGA-EE-A2GO-06  
 TCGA-FC-A33P-06  
 TCGA-ER-A3ES-06  
 TCGA-FR-A6YD-06  
 TCGA-FS-A1ZU-06  
 TCGA-3N-A9WB-06  
 TCGA-D9-A1X3-06  
 TCGA-FS-A1ZK-06  
 TCGA-WE-A8ZQ-06  
 TCGA-D3-A8GK-06  
 TCGA-D9-A4Z6-06  
 TCGA-FS-A1ZC-06  
 TCGA-D3-A8GL-06  
 TCGA-W3-AA21-06  
 TCGA-GN-A262-06  
 TCGA-ER-A19L-06  
 TCGA-FS-A1Z3-06  
 TCGA-EE-A29A-06  
 TCGA-WE-A8K6-06  
 TCGA-EE-A2MM-06  
 TCGA-EE-A29B-06  
 TCGA-EE-A695-06  
 TCGA-EE-A2A5-06  
 TCGA-EE-A20H-06  
 TCGA-GN-A268-06  
 TCGA-FS-A4FB-06  
 TCGA-EE-A3J8-06  
 TCGA-DA-A95Z-06  
 TCGA-FS-A1ZE-06  
 TCGA-FW-A3I3-06  
 TCGA-EP-A690-06  
 TCGA-WE-A8JZ-06  
 TCGA-D3-A3C6-06  
 TCGA-D3-A8GY-06  
 TCGA-FS-A4F5-06  
 TCGA-EE-A29D-06  
 TCGA-EE-A2GR-06  
 TCGA-EE-A180-06  
 TCGA-EE-A3AD-06  
 TCGA-FS-A4F9-06  
 TCGA-D3-A3ML-06  
 TCGA-D3-A3MO-06  
 TCGA-EE-A3J7-06  
 TCGA-EE-A3J7-06  
 TCGA-LH-A9QB-06  
 TCGA-EE-A19F-06  
 TCGA-EE-A29L-06  
 TCGA-DA-A95W-06  
 TCGA-D3-A5GL-06  
 TCGA-D3-A8GP-06  
 TCGA-ER-A42K-06  
 TCGA-FS-A1ZZ-06  
 TCGA-D9-A6EG-06  
 TCGA-EE-A20C-06  
 TCGA-FS-A4F0-06  
 TCGA-W3-A824-06  
 TCGA-EE-A29E-06  
 TCGA-D3-A1O8-06  
 TCGA-D9-A6EC-06  
 TCGA-D3-A8GC-06  
 TCGA-EE-A3JI-06

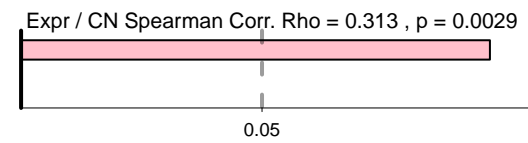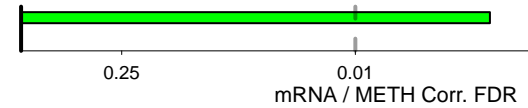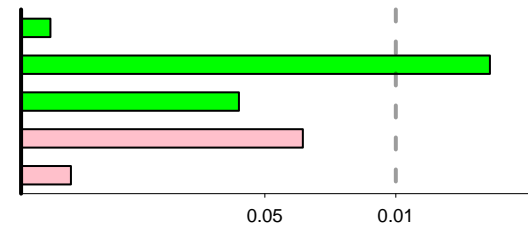



# COL6A1

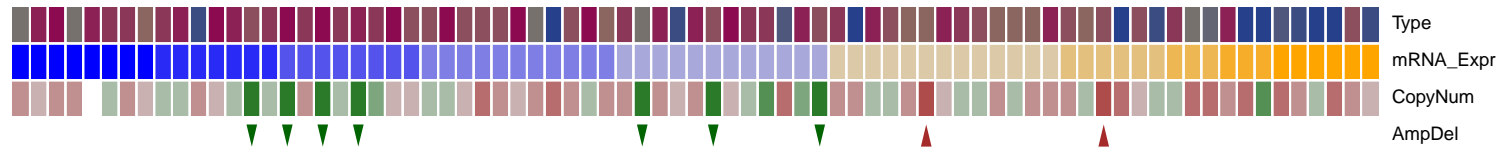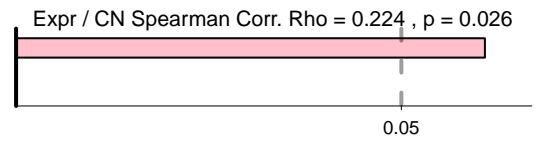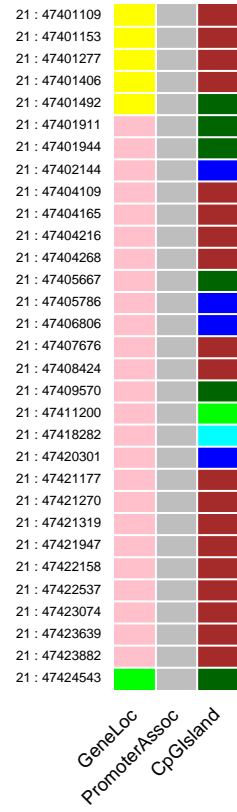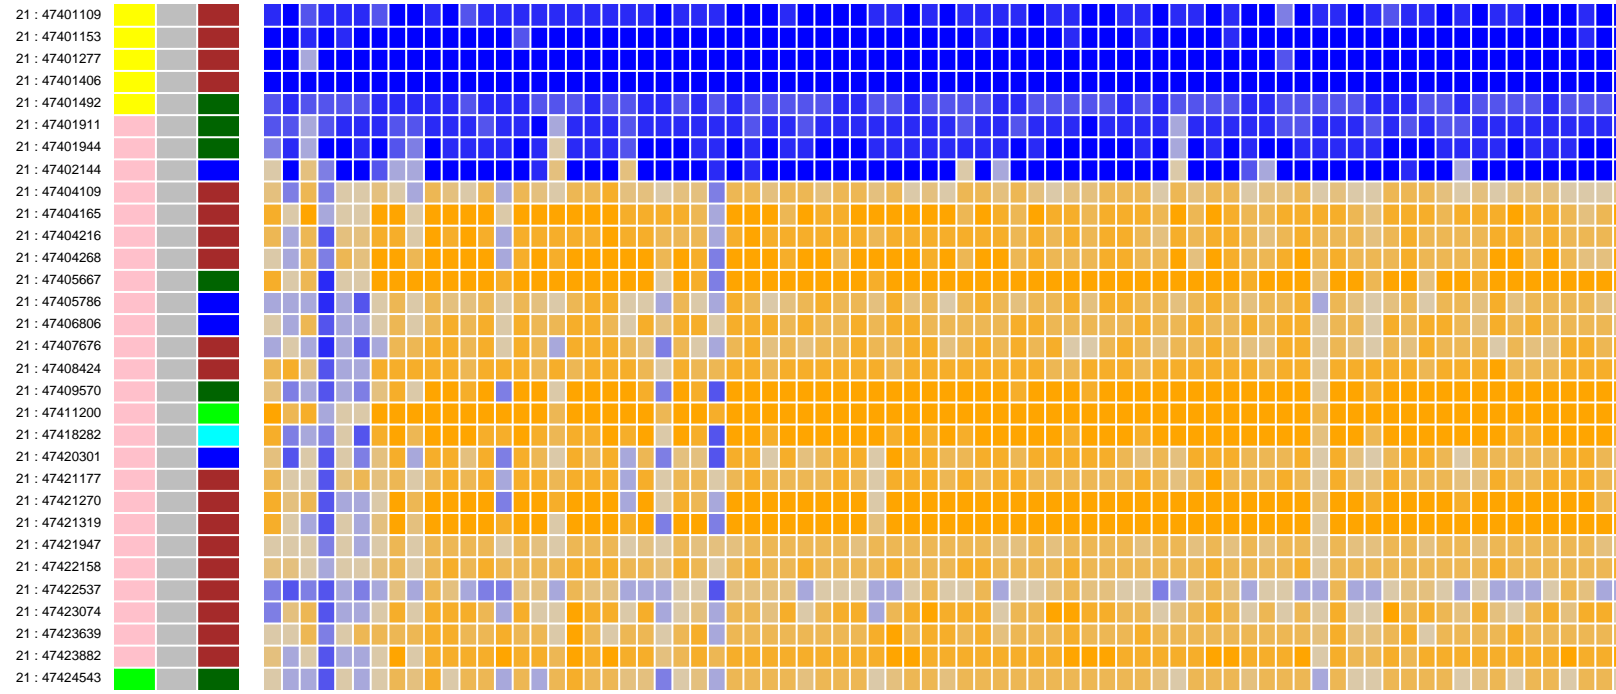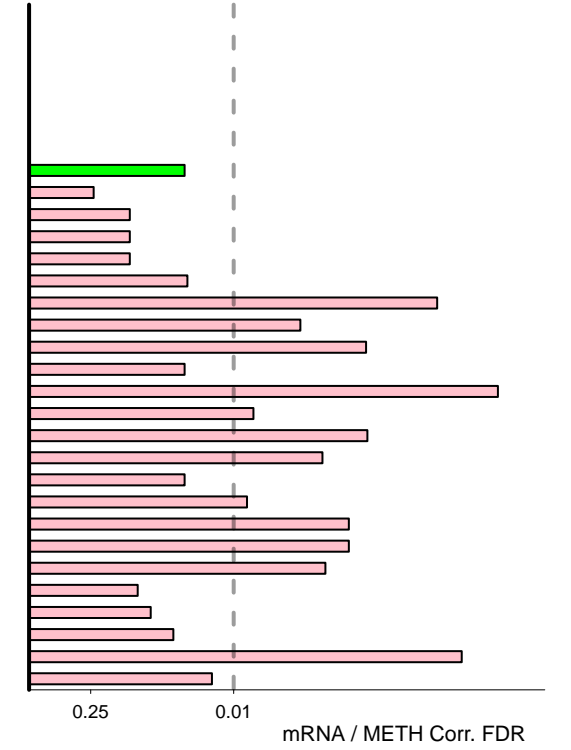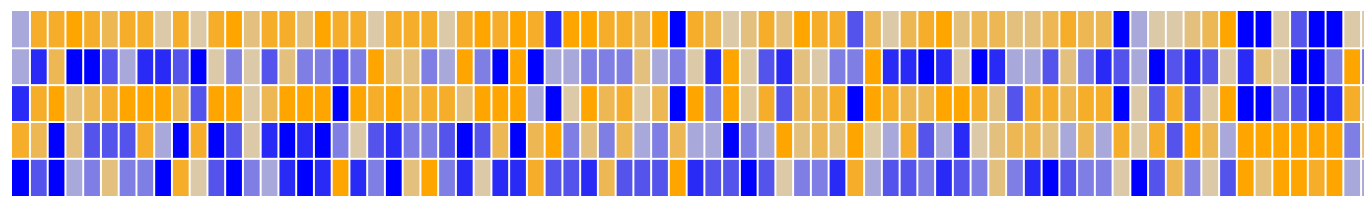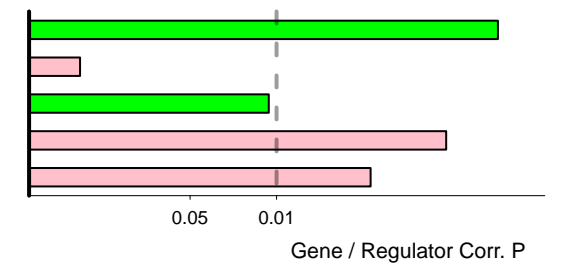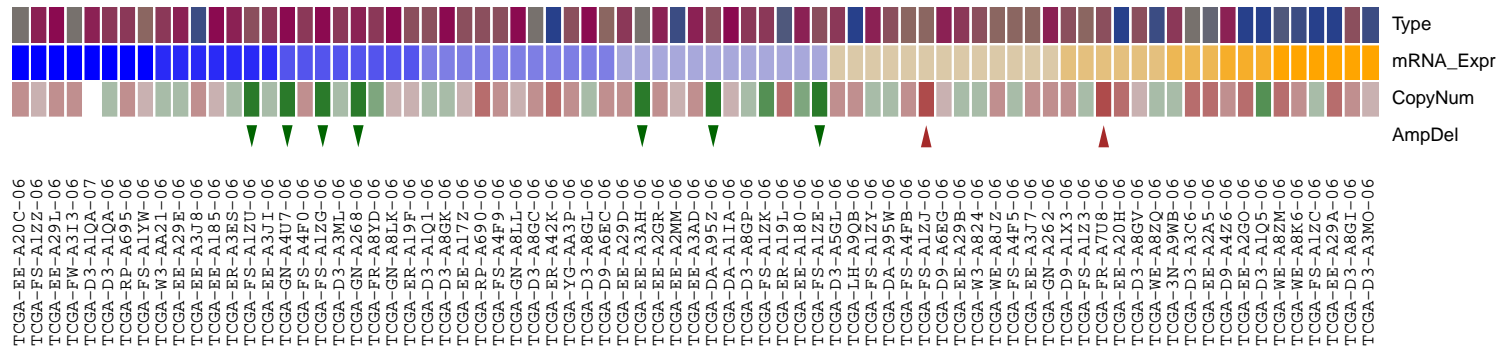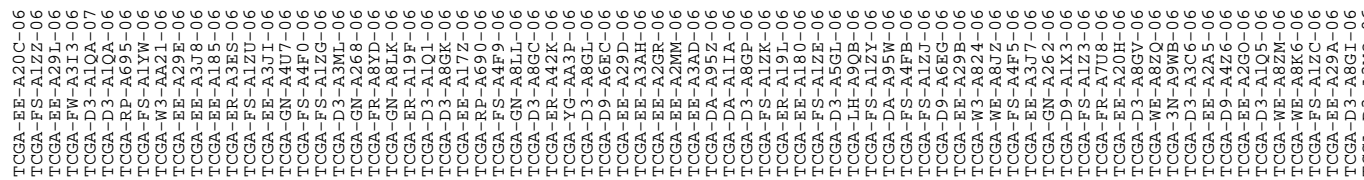

# ZEB1

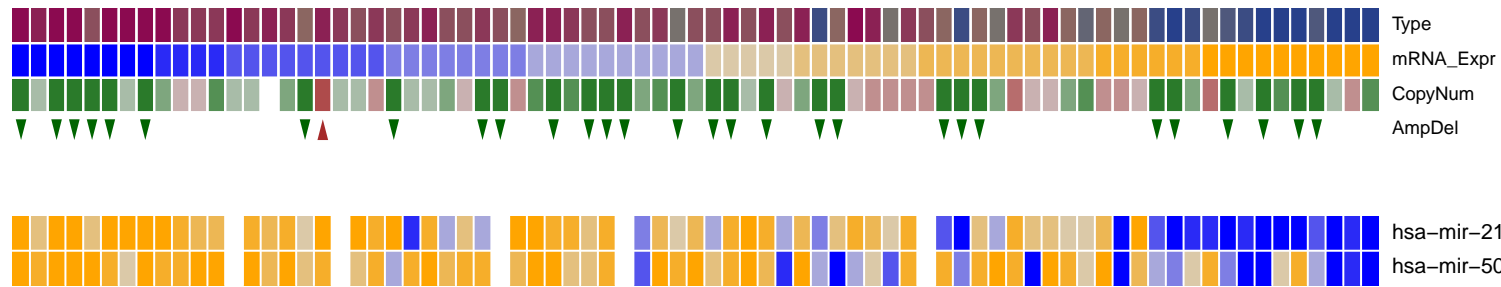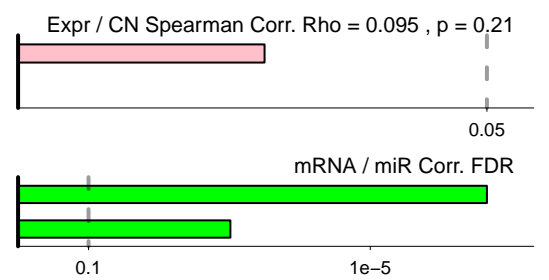

10 : 31607150  
 10 : 31607153  
 10 : 31607160  
 10 : 31607228  
 10 : 31607300  
 10 : 31607306  
 10 : 31607330  
 10 : 31607441  
 10 : 31607685  
 10 : 31607699  
 10 : 31607717  
 10 : 31607925  
 10 : 31607955  
 10 : 31607973  
 10 : 31608136  
 10 : 31608188  
 10 : 31608207  
 10 : 31608209  
 10 : 31608212  
 10 : 31608402  
 10 : 31608548  
 10 : 31608663  
 10 : 31609200  
 10 : 31609347  
 10 : 31609351  
 10 : 31609531  
 10 : 31609882  
 10 : 31609891  
 10 : 31609896  
 10 : 31609905  
 10 : 31609919  
 10 : 31609960  
 10 : 31610091  
 10 : 31610093  
 10 : 31610399  
 10 : 31610754  
 10 : 31611868  
 10 : 31612795  
 10 : 31702967  
 10 : 31715394  
 10 : 31747241  
 10 : 31816809

GeneLoc  
 PromoterAssoc  
 CpGIsland

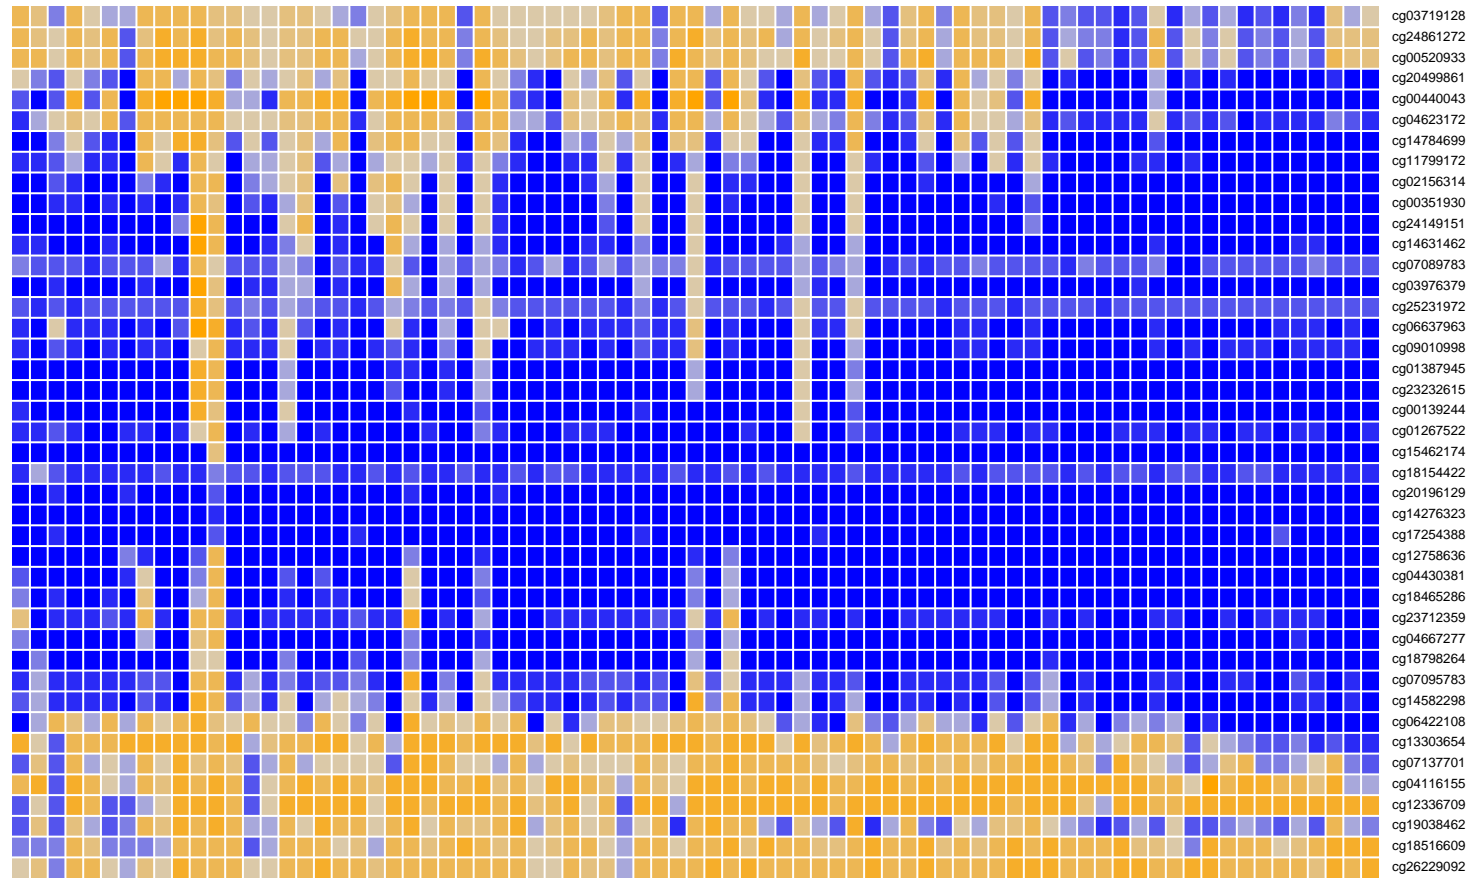

cg03719128  
 cg24861272  
 cg00520933  
 cg20499861  
 cg00440043  
 cg04623172  
 cg14784699  
 cg11799172  
 cg02156314  
 cg00351930  
 cg24149151  
 cg14631462  
 cg07089783  
 cg03976379  
 cg25231972  
 cg06637963  
 cg09010998  
 cg01387945  
 cg23232615  
 cg00139244  
 cg01267522  
 cg15462174  
 cg18154422  
 cg20196129  
 cg14276323  
 cg17254388  
 cg12758636  
 cg04430381  
 cg18465286  
 cg23712359  
 cg04667277  
 cg18798264  
 cg07095783  
 cg14582298  
 cg06422108  
 cg13303654  
 cg07137701  
 cg04116155  
 cg12336709  
 cg19038462  
 cg18516609  
 cg26229092

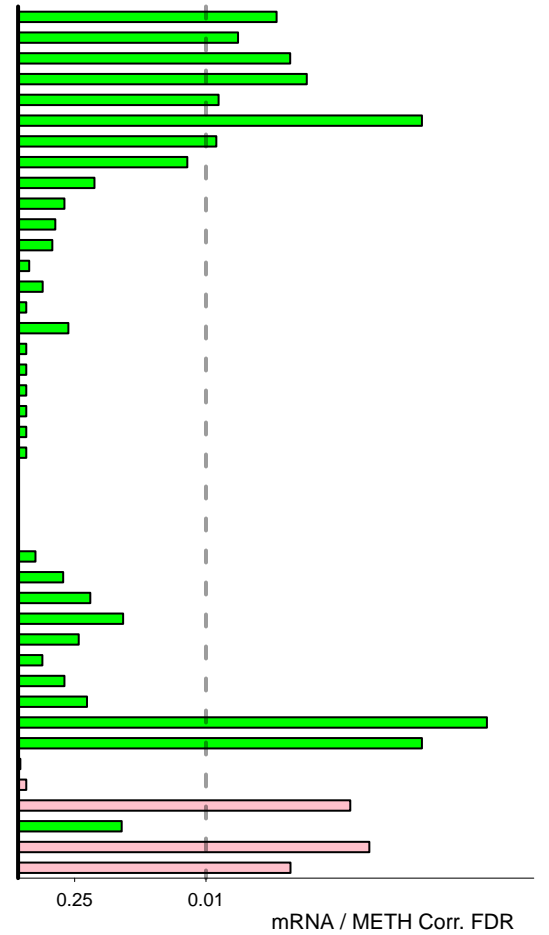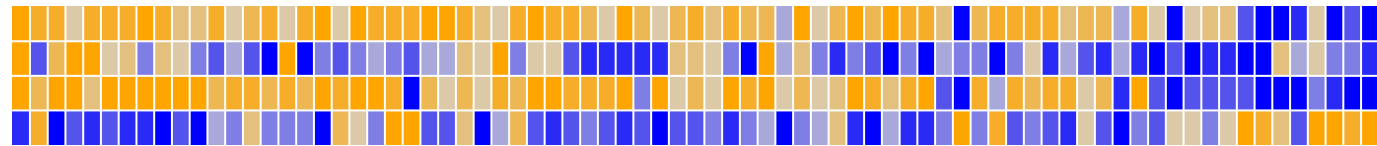

MITF  
 SOX10  
 TRPM1  
 AXL

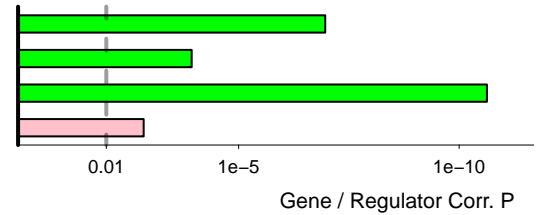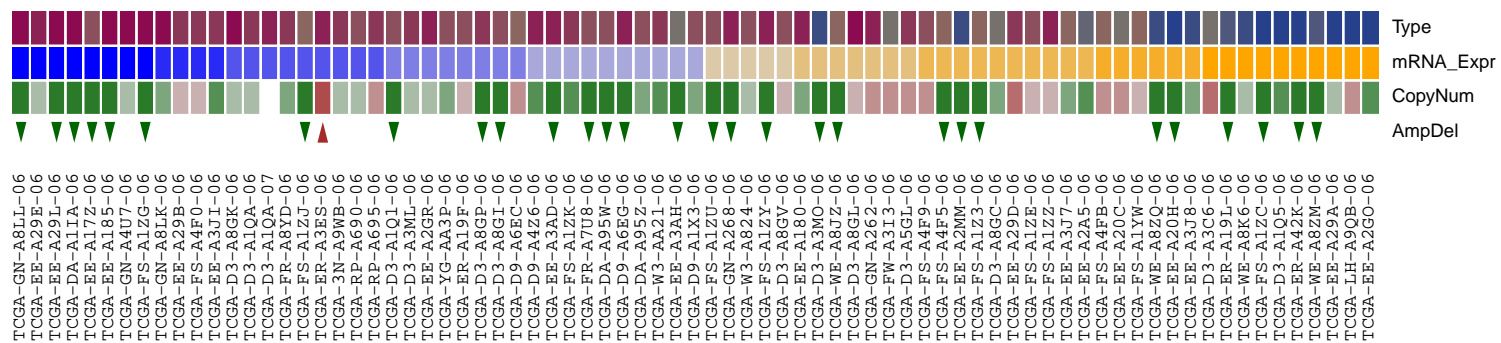

TCGA-GN-A8LI-06  
 TCGA-EE-A29E-06  
 TCGA-EE-A29I-06  
 TCGA-DA-A1IA-06  
 TCGA-EE-A17Z-06  
 TCGA-EE-A185-06  
 TCGA-GN-A4U7-06  
 TCGA-FS-A1ZG-06  
 TCGA-GN-A8LK-06  
 TCGA-EE-A29B-06  
 TCGA-FS-A4F0-06  
 TCGA-EE-A3J1-06  
 TCGA-D3-A8GK-06  
 TCGA-D3-A10A-06  
 TCGA-D3-A10A-07  
 TCGA-EE-A8YD-06  
 TCGA-FS-A1ZL-06  
 TCGA-ER-A3ES-06  
 TCGA-GN-A9WB-06  
 TCGA-RP-A690-06  
 TCGA-RP-A695-06  
 TCGA-D3-A1Q1-06  
 TCGA-D3-A3ML-06  
 TCGA-EE-A2GR-06  
 TCGA-YG-AA3P-06  
 TCGA-ER-A19F-06  
 TCGA-D3-A8GP-06  
 TCGA-D3-A8GI-06  
 TCGA-D9-A6EC-06  
 TCGA-D9-A4Z6-06  
 TCGA-EE-A3AD-06  
 TCGA-FR-A7U8-06  
 TCGA-DA-A95W-06  
 TCGA-D9-A6EG-06  
 TCGA-DA-A95Z-06  
 TCGA-W3-AA21-06  
 TCGA-EE-A3AH-06  
 TCGA-D9-A1X3-06  
 TCGA-FS-A1ZU-06  
 TCGA-GN-A268-06  
 TCGA-W3-A824-06  
 TCGA-FS-A1ZY-06  
 TCGA-D3-A8GV-06  
 TCGA-EE-A180-06  
 TCGA-WE-A8JZ-06  
 TCGA-D3-A3MO-06  
 TCGA-WE-A8JZ-06  
 TCGA-D3-A8GI-06  
 TCGA-GN-A262-06  
 TCGA-FS-A3I3-06  
 TCGA-FS-A5GL-06  
 TCGA-FS-A4F3-06  
 TCGA-FS-A4F5-06  
 TCGA-EE-A2MM-06  
 TCGA-FS-A1Z3-06  
 TCGA-D3-A8GC-06  
 TCGA-EE-A29D-06  
 TCGA-FS-A1ZE-06  
 TCGA-EE-A3J7-06  
 TCGA-EE-A2A5-06  
 TCGA-EE-A2A5-06  
 TCGA-EE-A20C-06  
 TCGA-FS-A1YW-06  
 TCGA-WE-A8ZQ-06  
 TCGA-EE-A20H-06  
 TCGA-EE-A3J8-06  
 TCGA-D3-A3C6-06  
 TCGA-ER-A191-06  
 TCGA-WE-A8K6-06  
 TCGA-FS-A1ZC-06  
 TCGA-D3-A1Q5-06  
 TCGA-ER-A42K-06  
 TCGA-WE-A8ZM-06  
 TCGA-EE-A29A-06  
 TCGA-LH-A90B-06  
 TCGA-EE-A2GO-06

# CYR61

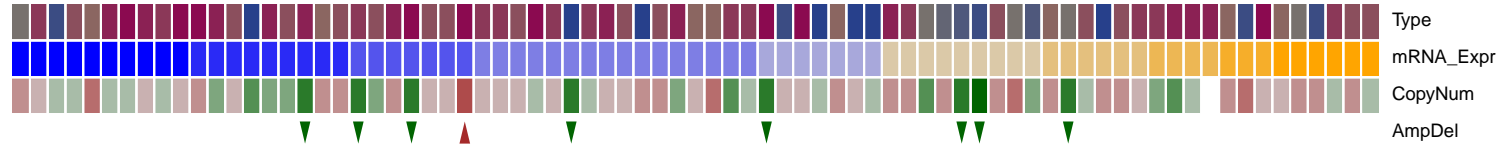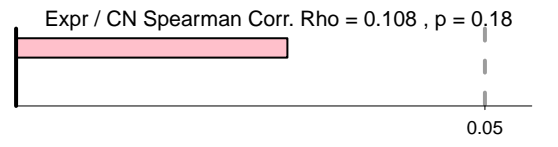

1 : 86045347  
 1 : 86045474  
 1 : 86045527  
 1 : 86045841  
 1 : 86045936  
 1 : 86046322  
 1 : 86046363  
 1 : 86046377  
 1 : 86046512  
 1 : 86046570  
 1 : 86046661  
 1 : 86046764  
 1 : 86046961  
 1 : 86047227  
 1 : 86047239  
 1 : 86047433  
 1 : 86047660  
 1 : 86047807  
 1 : 86047911  
 1 : 86048479  
 1 : 86048540  
 1 : 86048585  
 1 : 86048923

GeneLoc  
 PromoterAssoc  
 CpGIsland

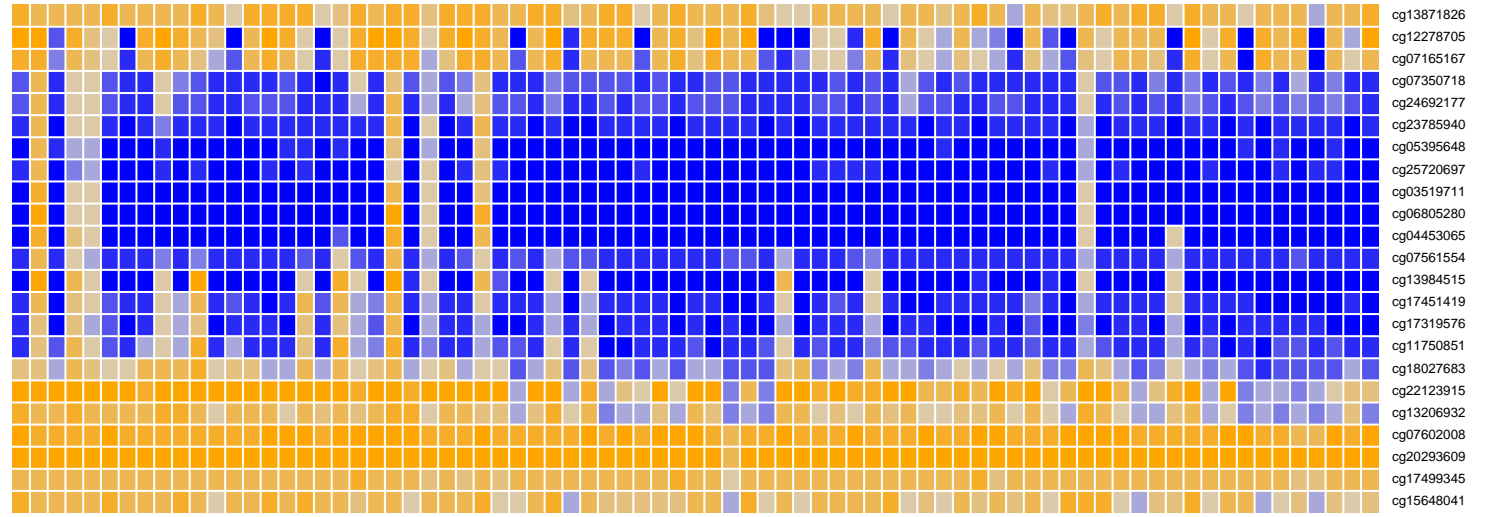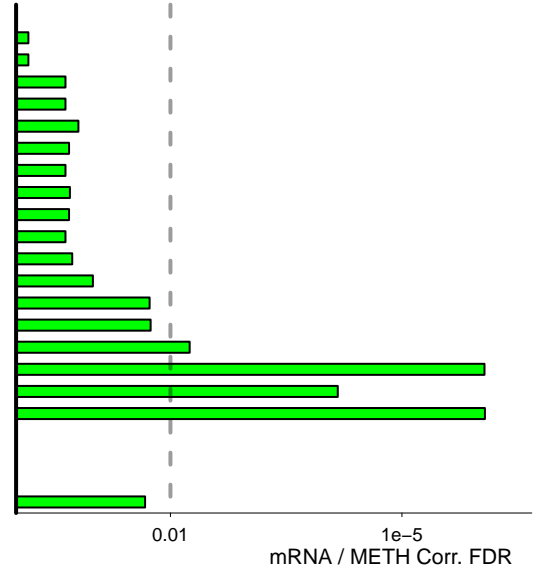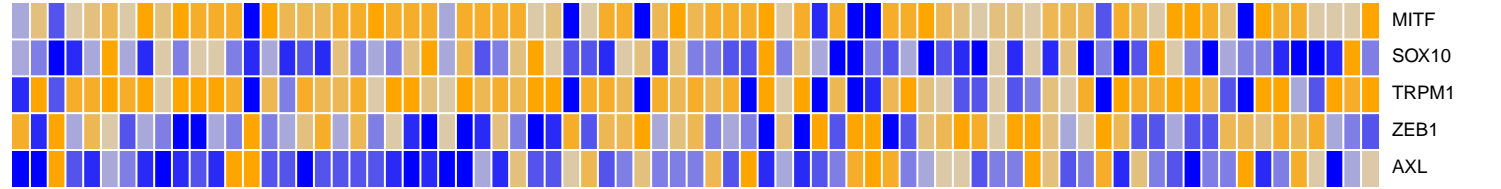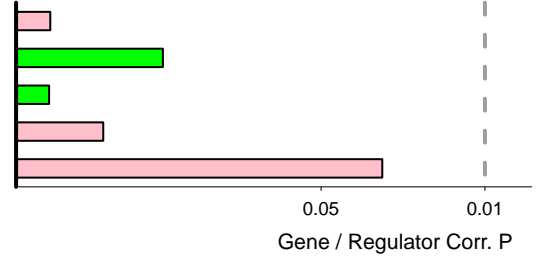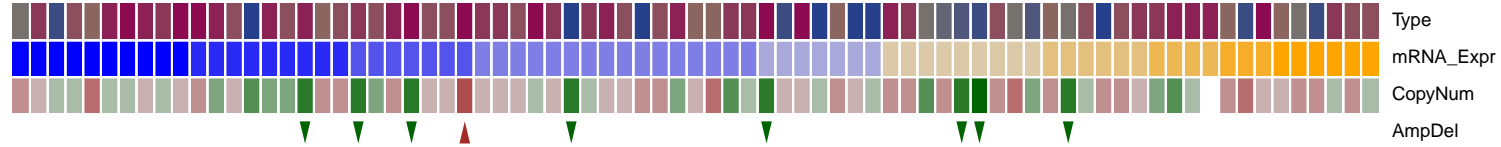

TCGA-EE-A20C-06  
 TCGA-FS-A4F0-06  
 TCGA-WE-A8K6-06  
 TCGA-DA-A95W-06  
 TCGA-EE-A3J7-06  
 TCGA-FS-A1ZY-06  
 TCGA-D3-A8GK-06  
 TCGA-D9-A6EG-06  
 TCGA-D3-A8GP-06  
 TCGA-FS-A1ZG-06  
 TCGA-EE-A185-06  
 TCGA-EE-A3AD-06  
 TCGA-D3-A1O1-06  
 TCGA-EE-A26O-06  
 TCGA-EE-A2GR-06  
 TCGA-DA-A95Z-06  
 TCGA-GN-A2Z2-06  
 TCGA-FS-A4PE-06  
 TCGA-D9-A1X3-06  
 TCGA-EE-A29D-06  
 TCGA-IG-AA3F-06  
 TCGA-GN-A268-06  
 TCGA-GN-A8LK-06  
 TCGA-EE-A17Z-06  
 TCGA-D3-A8GV-06  
 TCGA-EE-A29L-06  
 TCGA-EE-A3JI-06  
 TCGA-D3-A5GL-06  
 TCGA-ER-A19F-06  
 TCGA-DA-A1IA-06  
 TCGA-EE-A29B-06  
 TCGA-EE-A20H-06  
 TCGA-3N-A9WB-06  
 TCGA-FS-A1ZZ-06  
 TCGA-FS-A1ZE-06  
 TCGA-D3-A1O5-06  
 TCGA-FR-A7H8-06  
 TCGA-EE-A180-06  
 TCGA-FS-A1Z3-06  
 TCGA-D9-A6EC-06  
 TCGA-FS-A1ZK-06  
 TCGA-D3-A3ML-06  
 TCGA-GN-A8LL-06  
 TCGA-D3-A3MO-06  
 TCGA-GN-A4H7-06  
 TCGA-ER-A42K-06  
 TCGA-FS-A1ZT-06  
 TCGA-FS-A1ZC-06  
 TCGA-EE-A29A-06  
 TCGA-EE-A29E-06  
 TCGA-RP-A59F-06  
 TCGA-FW-A3I3-06  
 TCGA-EE-A2A5-06  
 TCGA-ER-A19L-06  
 TCGA-WE-A8ZQ-06  
 TCGA-D3-A3C6-06  
 TCGA-WE-A8ZM-06  
 TCGA-WE-A8JZ-06  
 TCGA-EE-A3AH-06  
 TCGA-W3-A824-06  
 TCGA-LH-A9QB-06  
 TCGA-FS-A4F9-06  
 TCGA-D3-A1QA-06  
 TCGA-FR-A8YD-06  
 TCGA-D9-A4Z6-06  
 TCGA-ER-A3ES-06  
 TCGA-D3-A1QA-07  
 TCGA-FS-A4F5-06  
 TCGA-EE-A2MM-06  
 TCGA-D3-A8GL-06  
 TCGA-FS-A1YW-06  
 TCGA-D3-A8GC-06  
 TCGA-EE-A378-06  
 TCGA-W3-AA21-06  
 TCGA-D3-A8GI-06  
 TCGA-RP-A690-06

# LIFR

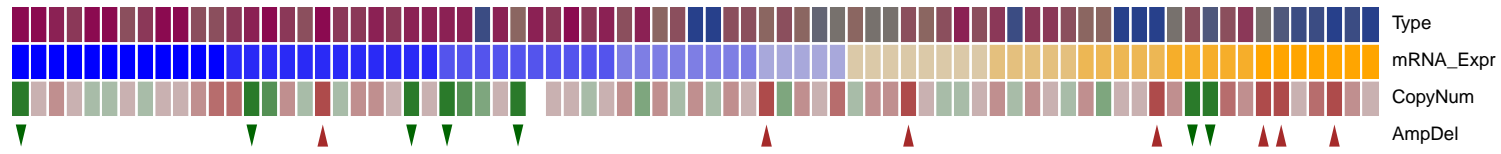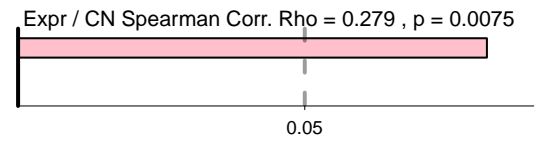

5 : 38607402  
5 : 38597870  
5 : 38596220  
5 : 38596133  
5 : 38596129  
5 : 38595383  
5 : 38591594  
5 : 38557634  
5 : 38557465  
5 : 38557386  
5 : 38557253  
5 : 38557162  
5 : 38557143  
5 : 38557085  
5 : 38556796  
5 : 38556435  
5 : 38556223  
5 : 38556108  
5 : 38554778  
5 : 38552952  
5 : 38534081  
5 : 38501577  
5 : 38479736

GeneLoc  
PromoterAssoc  
CpGIsland

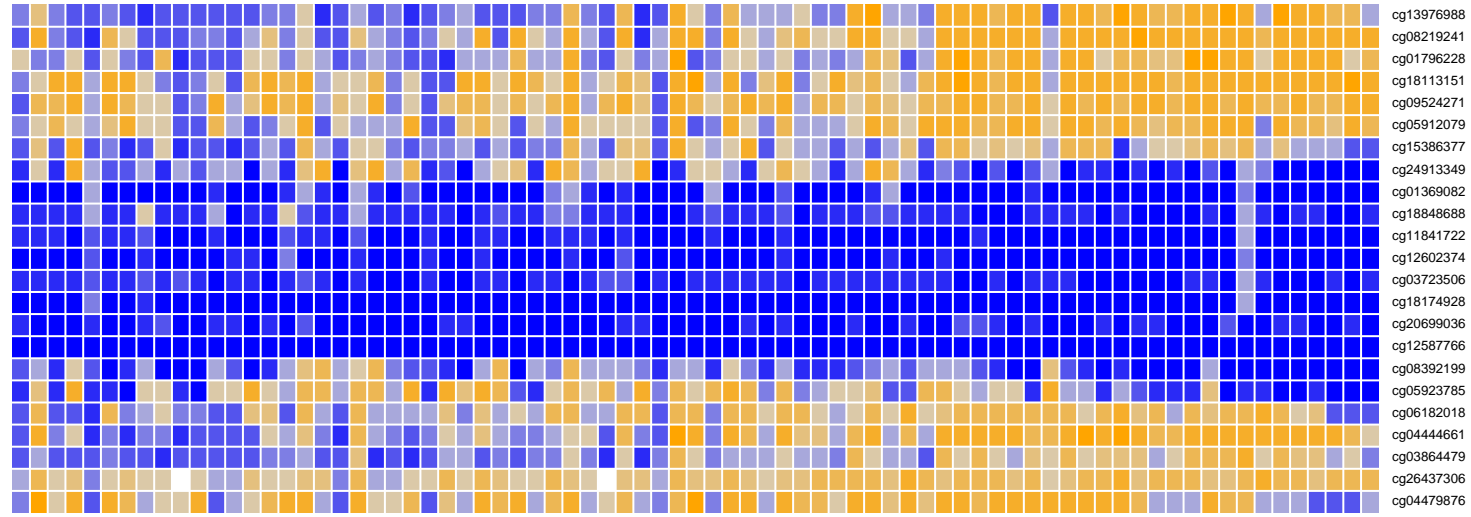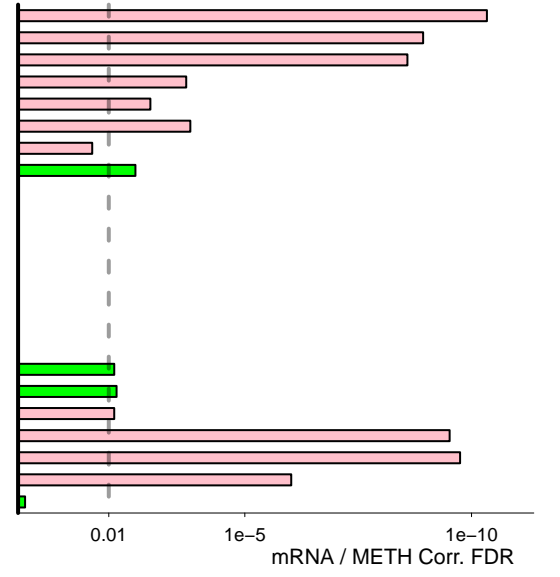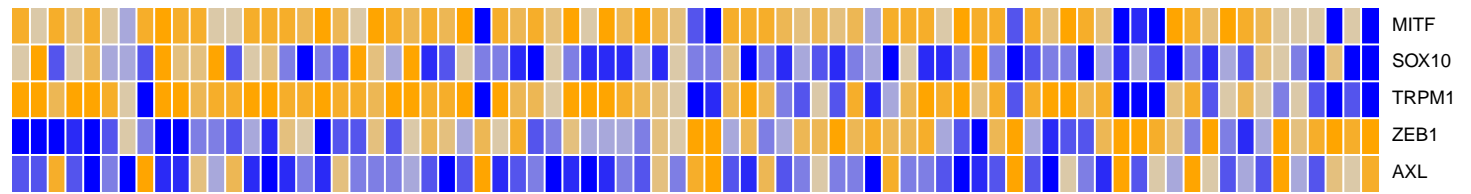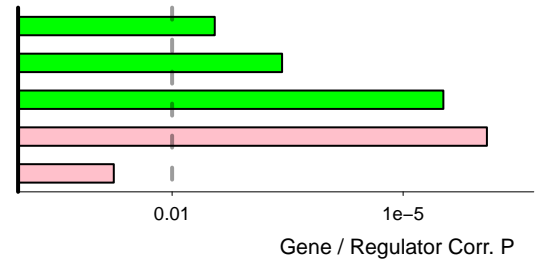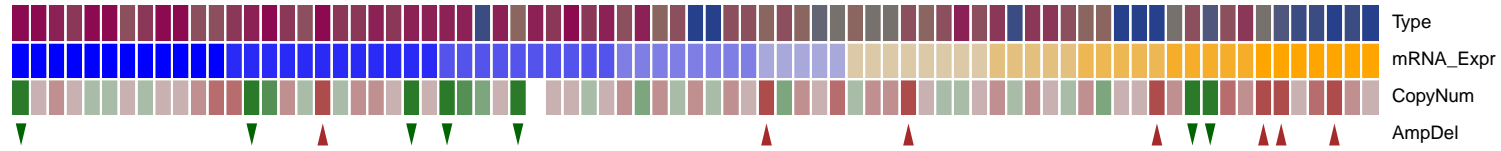

TCGA-EE-A185-06  
TCGA-DA-A11A-06  
TCGA-EE-A29E-06  
TCGA-EE-A29B-06  
TCGA-EE-A29L-06  
TCGA-D3-A8GK-06  
TCGA-D3-A8GV-06  
TCGA-D3-A3ML-06  
TCGA-GN-A8LL-06  
TCGA-GN-A417-06  
TCGA-ER-A19F-06  
TCGA-D3-A8G1-06  
TCGA-3N-A9WE-06  
TCGA-EE-A3AD-06  
TCGA-GN-A8LK-06  
TCGA-D3-A5GU-06  
TCGA-W3-A824-06  
TCGA-FS-A1ZG-06  
TCGA-D3-A1QA-06  
TCGA-FR-A81D-06  
TCGA-EE-A18U-06  
TCGA-RP-A69S-06  
TCGA-FS-A1Z1-06  
TCGA-FS-A1Z2-06  
TCGA-GN-A262-06  
TCGA-D9-A4Z6-06  
TCGA-EE-A2MM-06  
TCGA-FS-A4FB-06  
TCGA-D3-A1QA-07  
TCGA-D3-A8GF-06  
TCGA-D3-A8GL-06  
TCGA-W3-AA21-06  
TCGA-D9-A6EG-06  
TCGA-FR-A718-06  
TCGA-EE-A2GR-06  
TCGA-WE-A8JZ-06  
TCGA-FS-A1ZU-06  
TCGA-LH-A90B-06  
TCGA-EE-A29A-06  
TCGA-D9-A1X3-06  
TCGA-FS-A4F9-06  
TCGA-D9-A6FC-06  
TCGA-DA-A95Z-06  
TCGA-FS-A4F5-06  
TCGA-EE-A2A5-06  
TCGA-D3-A3C6-06  
TCGA-FS-A1Z3-06  
TCGA-EE-A20C-06  
TCGA-D3-A8GC-06  
TCGA-FS-A1ZE-06  
TCGA-FS-A1EW-06  
TCGA-DA-A95M-06  
TCGA-ER-A3ES-06  
TCGA-EE-A17Z-06  
TCGA-EE-A29D-06  
TCGA-WE-A8K6-06  
TCGA-FS-A1ZK-06  
TCGA-FS-A4F0-06  
TCGA-RP-A690-06  
TCGA-FS-A1ZJ-06  
TCGA-EE-A3J7-06  
TCGA-EE-A2G0-06  
TCGA-ER-A42K-06  
TCGA-EE-A20H-06  
TCGA-FW-A313-06  
TCGA-D3-A1Q1-06  
TCGA-ER-A19L-06  
TCGA-YG-AA3P-06  
TCGA-EE-A3JI-06  
TCGA-EE-A3AH-06  
TCGA-WE-A8ZM-06  
TCGA-D3-A3MO-06  
TCGA-WE-A8ZQ-06  
TCGA-D3-A1O5-06  
TCGA-EE-A318-06  
TCGA-FS-A1JC-06

# KRT18

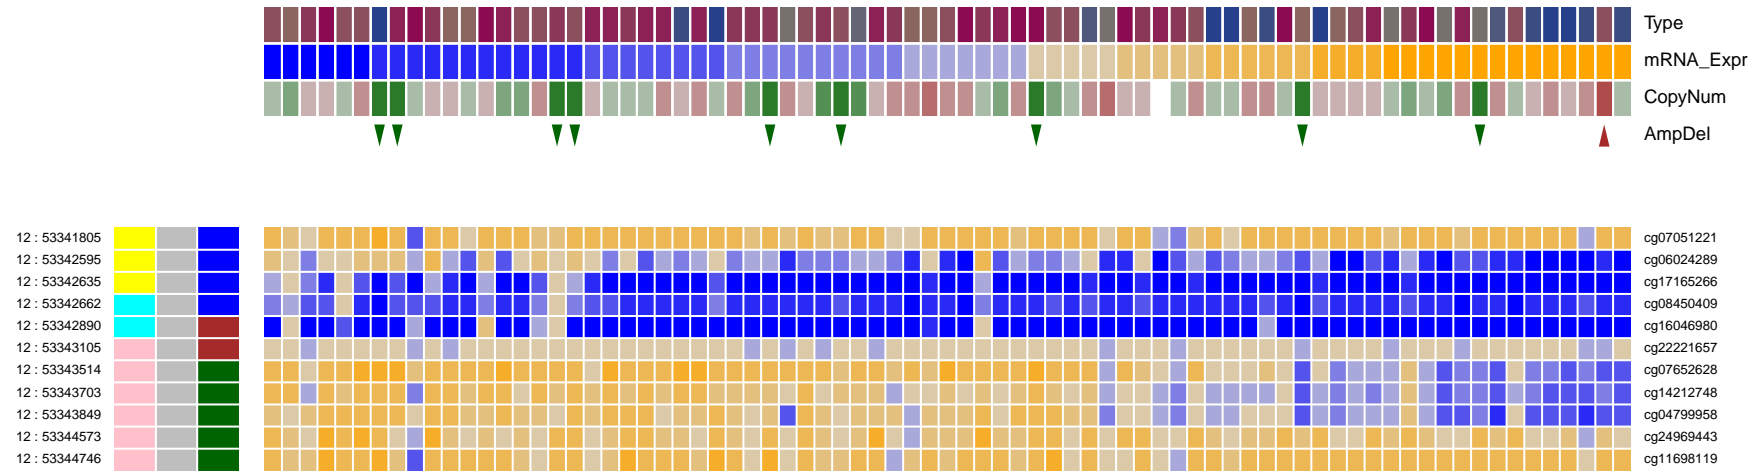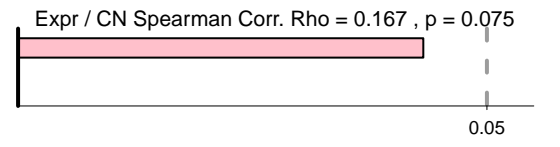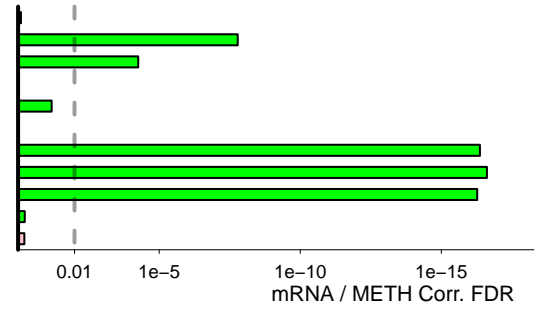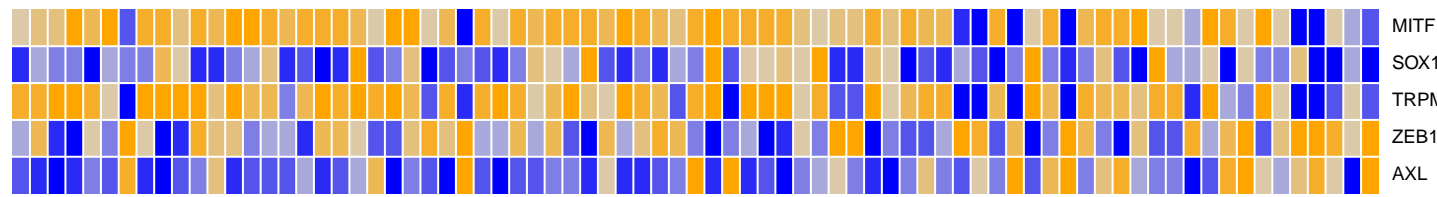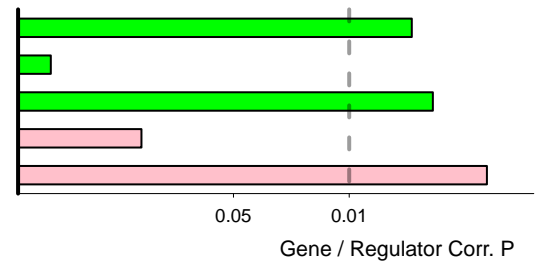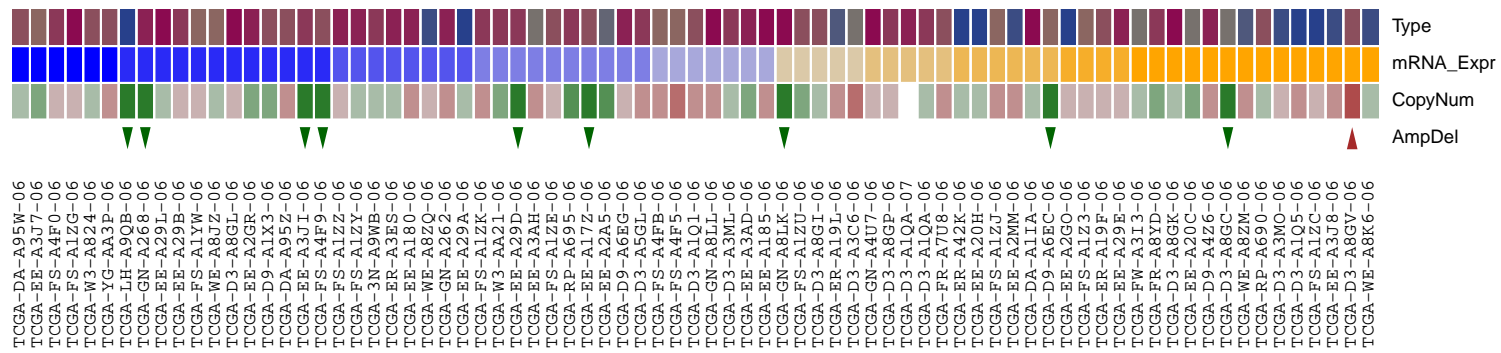

# CCBE1

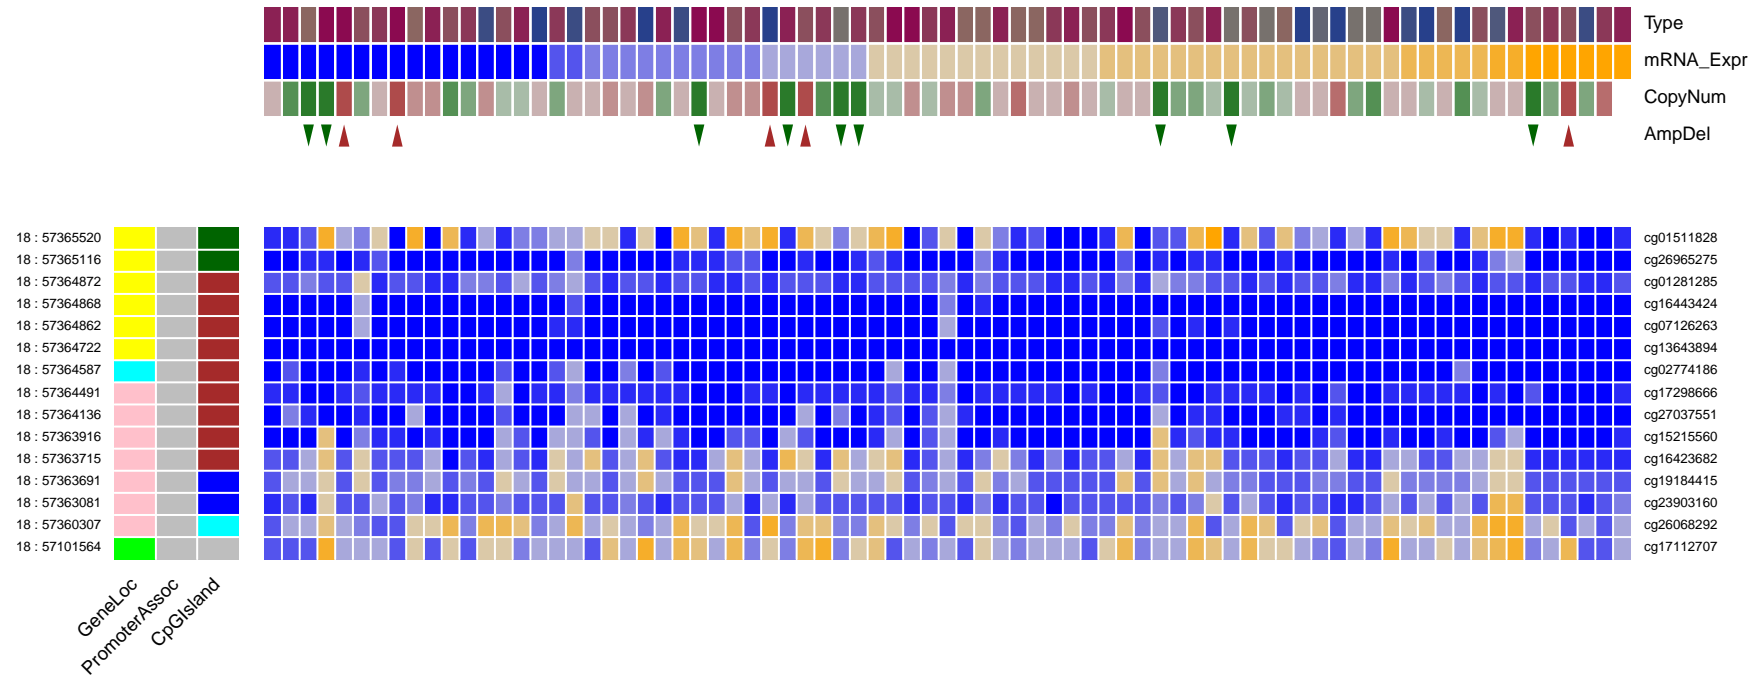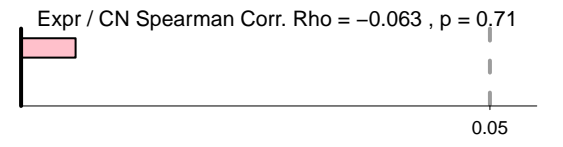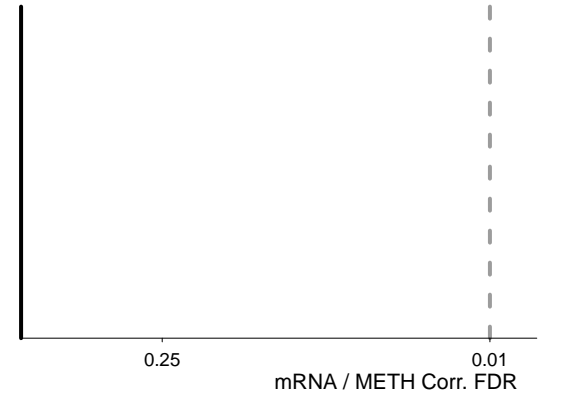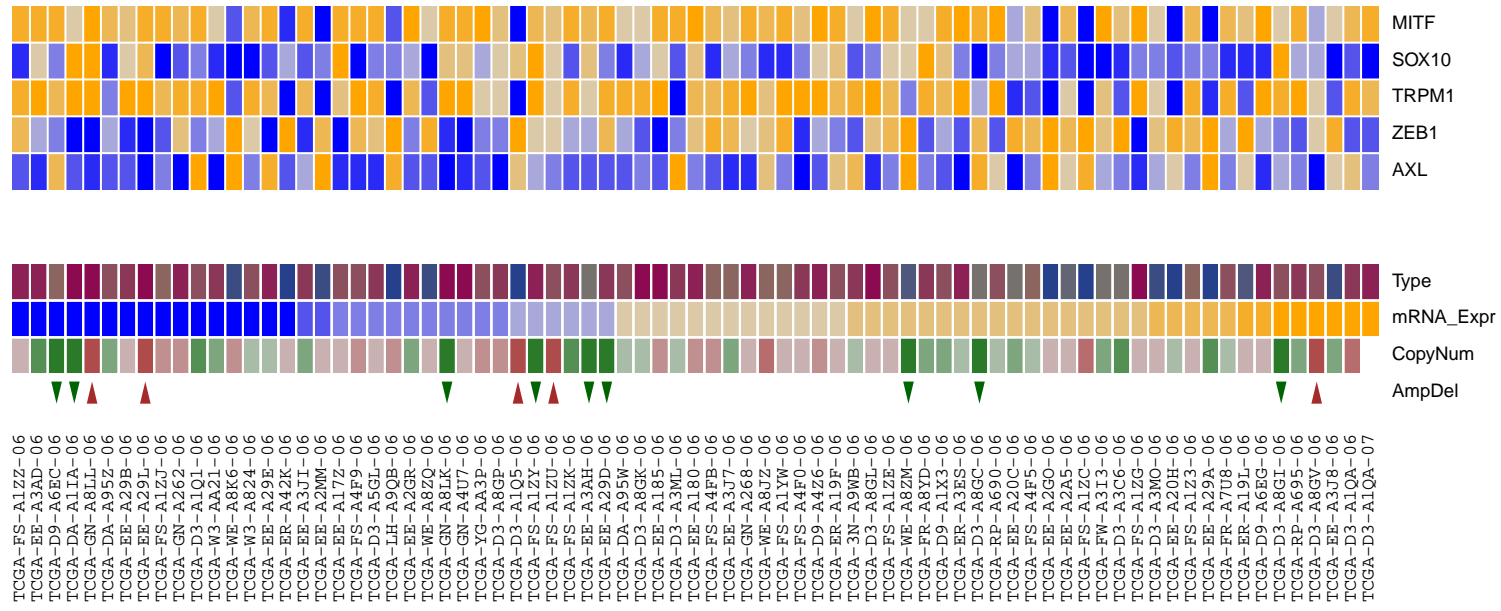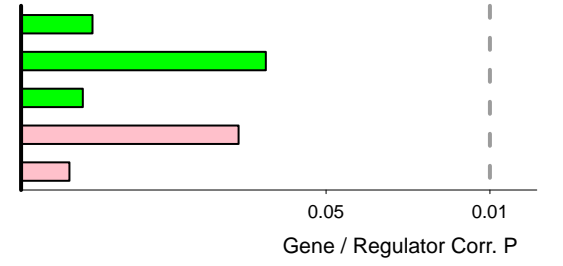

# RND3

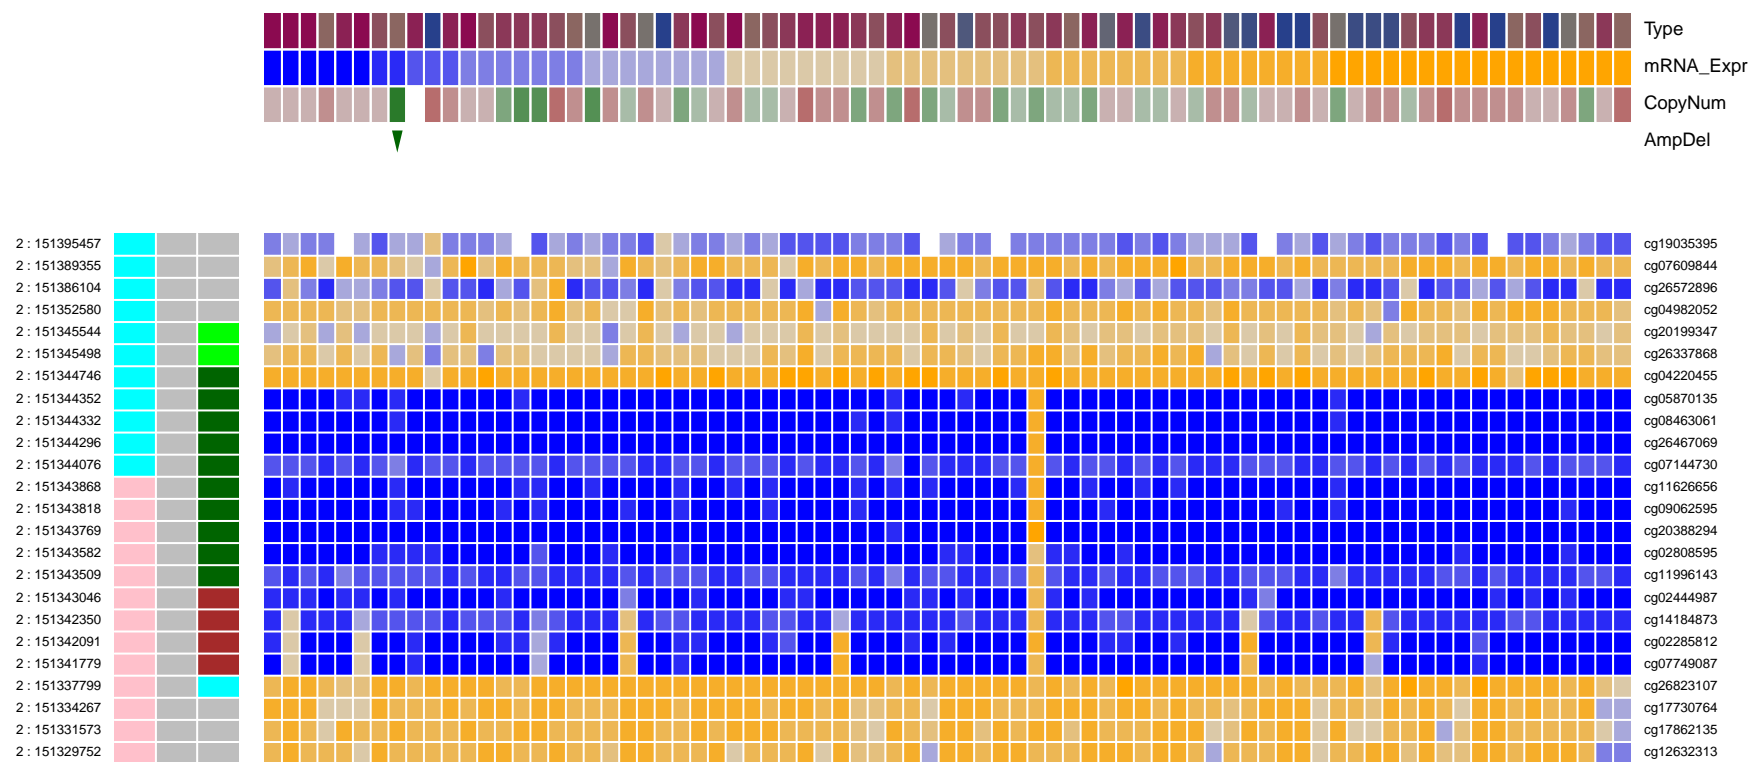

GeneLoc  
PromoterAssoc  
CpGIsland

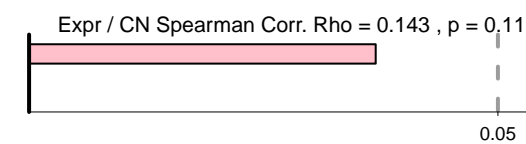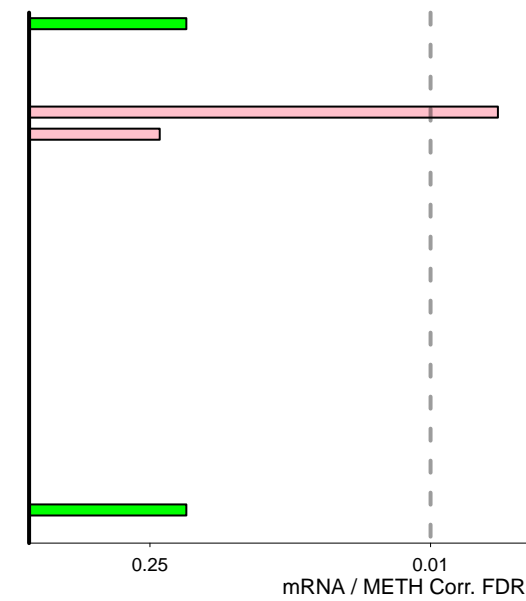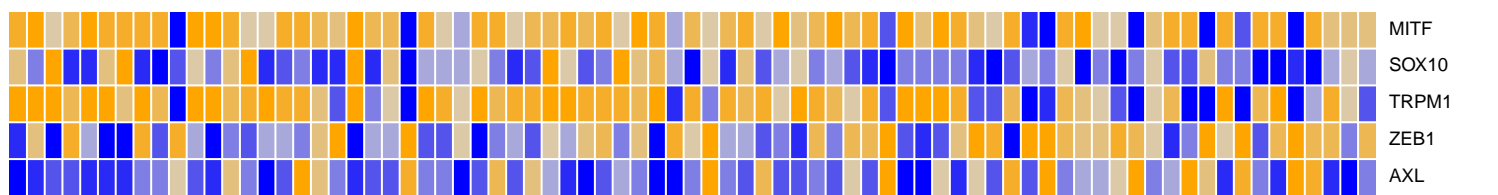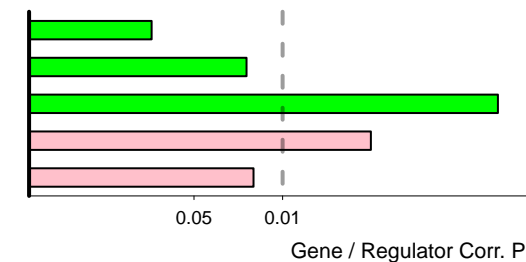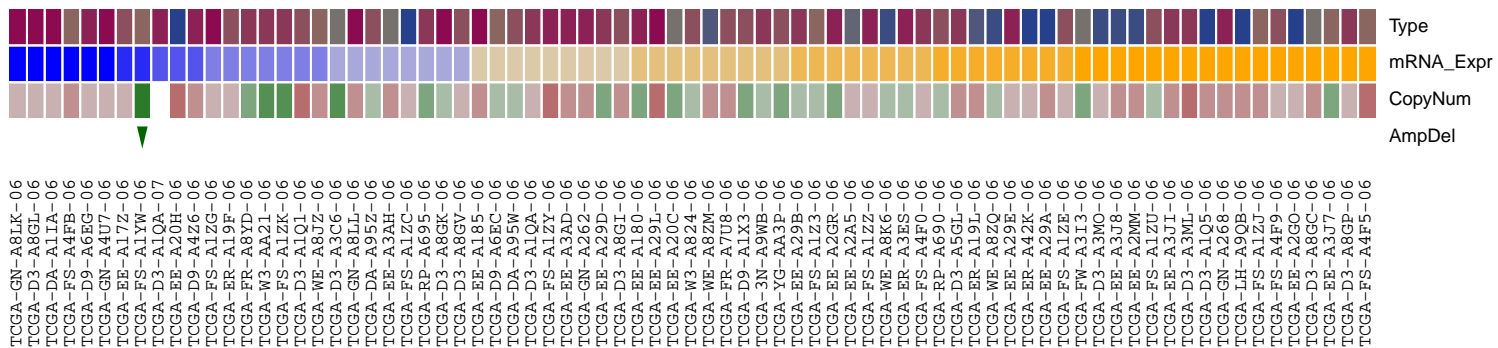

# CCL2

17 : 32580869  
 17 : 32581035  
 17 : 32581220  
 17 : 32581466  
 17 : 32582128  
 17 : 32582265  
 17 : 32582359  
 17 : 32582516  
 17 : 32582828

GeneLoc  
 PromoterAssoc  
 CpGIsland

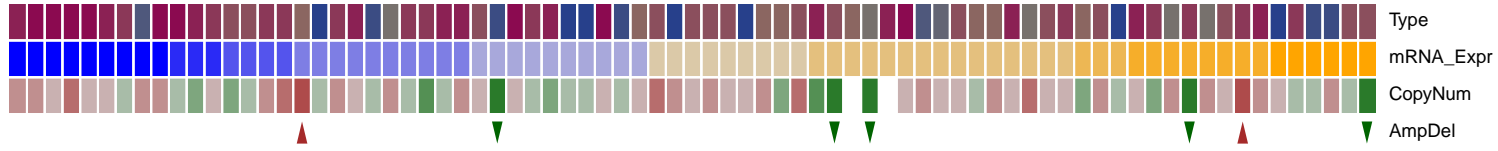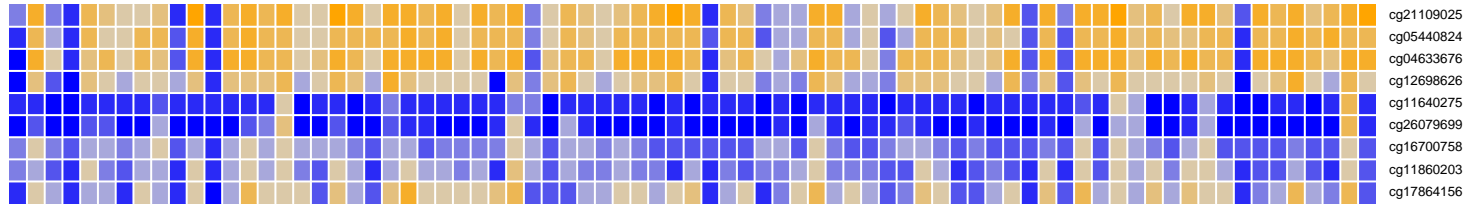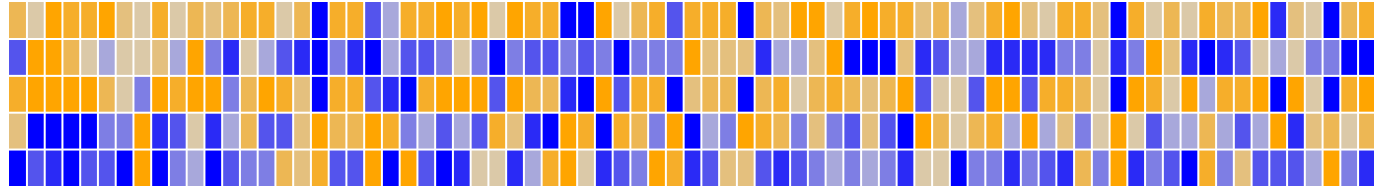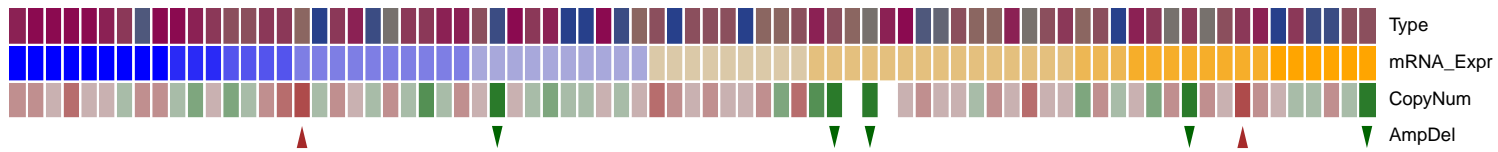

TCGA-GN-A262-06  
 TCGA-DA-A1IA-06  
 TCGA-GN-A8LL-06  
 TCGA-EE-A29L-06  
 TCGA-EE-A185-06  
 TCGA-EE-A2GR-06  
 TCGA-D3-A8GF-06  
 TCGA-WE-A8ZM-06  
 TCGA-GN-A8LK-06  
 TCGA-D3-A8GF-06  
 TCGA-PS-A1ZY-06  
 TCGA-PS-A4F0-06  
 TCGA-DA-A95Z-06  
 TCGA-PS-A1ZE-06  
 TCGA-PP-A695-06  
 TCGA-PP-A9MP-06  
 TCGA-WE-A8JZ-06  
 TCGA-PS-A1ZC-06  
 TCGA-EE-A29D-06  
 TCGA-PS-A1ZZ-06  
 TCGA-WE-A8K6-06  
 TCGA-EE-A20C-06  
 TCGA-D3-A3ML-06  
 TCGA-PS-A1ZK-06  
 TCGA-ER-A3ES-06  
 TCGA-EE-A3AD-06  
 TCGA-PP-A690-06  
 TCGA-EE-A3J8-06  
 TCGA-EE-A3JI-06  
 TCGA-EE-A29E-06  
 TCGA-EE-A29A-06  
 TCGA-EE-A20H-06  
 TCGA-PS-A1ZG-06  
 TCGA-WE-A8ZQ-06  
 TCGA-PS-A1Z3-06  
 TCGA-D3-A1Q1-06  
 TCGA-LH-A9QB-06  
 TCGA-EE-A17Z-06  
 TCGA-D9-A1X3-06  
 TCGA-ER-A19F-06  
 TCGA-D3-A1O5-06  
 TCGA-PS-A4FB-06  
 TCGA-EE-A3J7-06  
 TCGA-YG-AA3P-06  
 TCGA-EE-A180-06  
 TCGA-D3-A8GI-06  
 TCGA-PS-A1ZJ-06  
 TCGA-PS-A1Z3-06  
 TCGA-D3-A1O3-07  
 TCGA-GN-A4V7-06  
 TCGA-ER-A19L-06  
 TCGA-EE-A2A5-06  
 TCGA-D3-A8GV-06  
 TCGA-PS-A4F5-06  
 TCGA-PS-A1YW-06  
 TCGA-D9-A6EG-06  
 TCGA-DA-A95W-06  
 TCGA-D3-A5GL-06  
 TCGA-D9-A6EC-06  
 TCGA-PS-A1ZU-06  
 TCGA-EE-A2GO-06  
 TCGA-GN-A268-06  
 TCGA-PP-A8YD-06  
 TCGA-EE-A3AH-06  
 TCGA-W3-AA21-06  
 TCGA-D3-A8GC-06  
 TCGA-PP-A7U8-06  
 TCGA-D3-A1QA-06  
 TCGA-D9-A4Z6-06  
 TCGA-ER-A42K-06  
 TCGA-EE-A29B-06  
 TCGA-D3-A3MO-06  
 TCGA-EE-A2MM-06  
 TCGA-W3-A824-06  
 TCGA-PS-A4F9-06

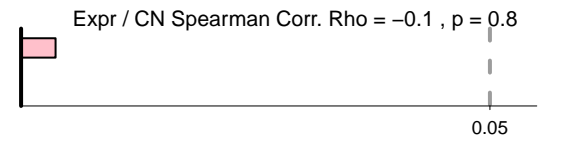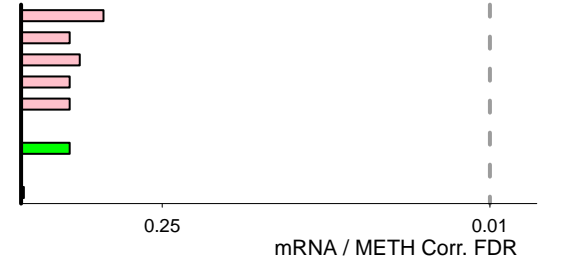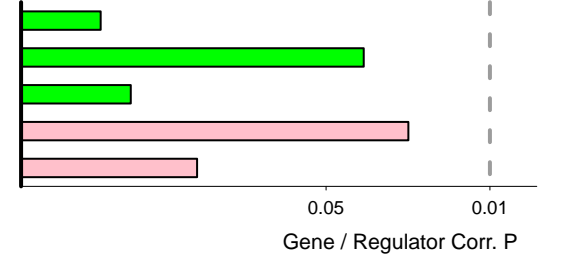



# OSMR

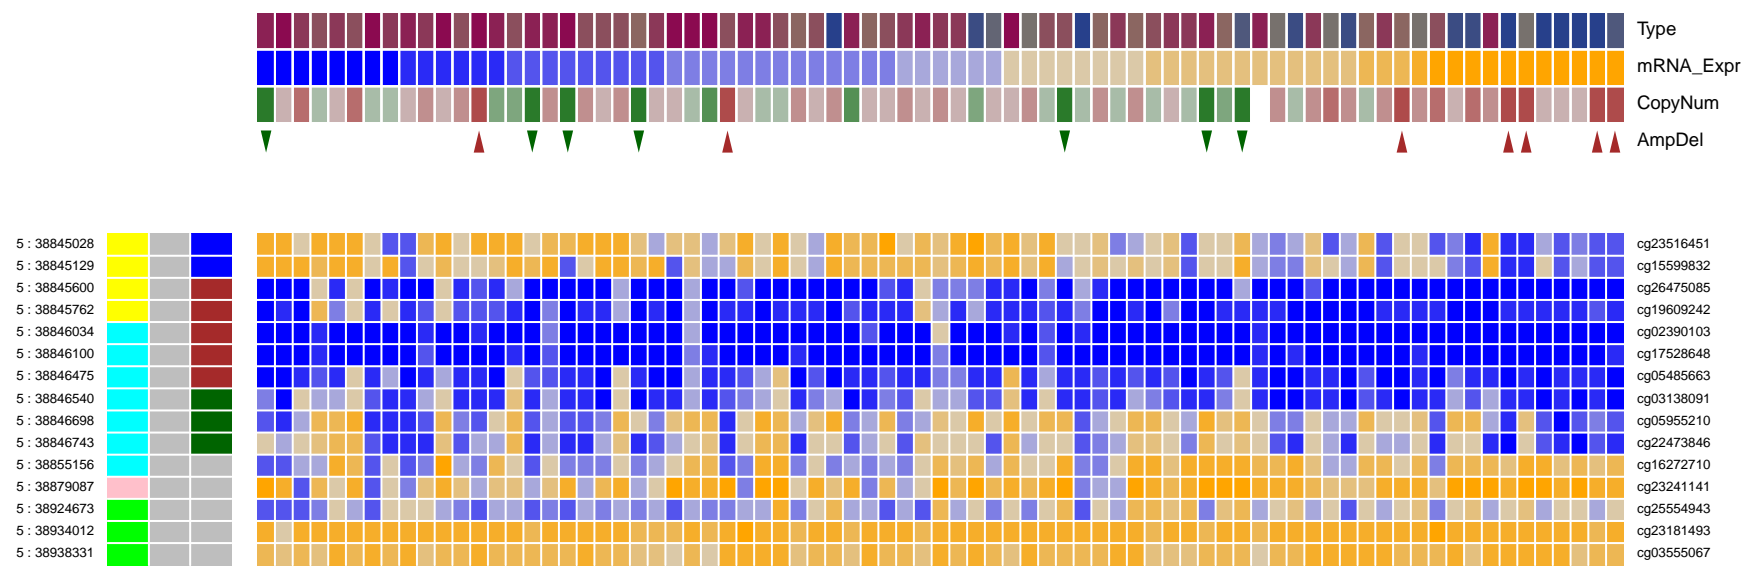

GeneLoc  
PromoterAssoc  
CpGIsland

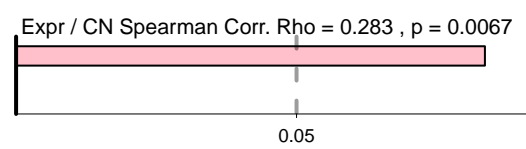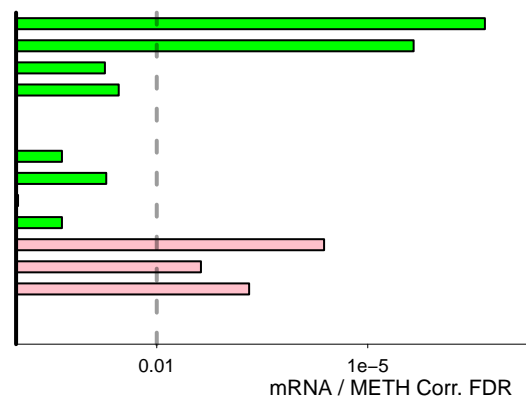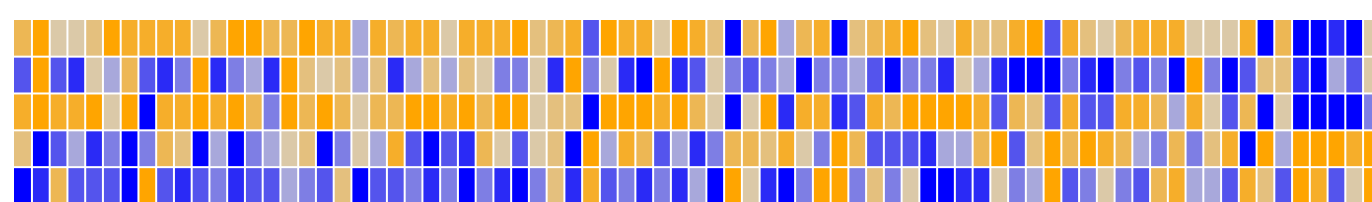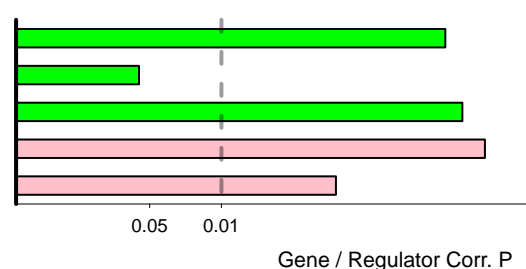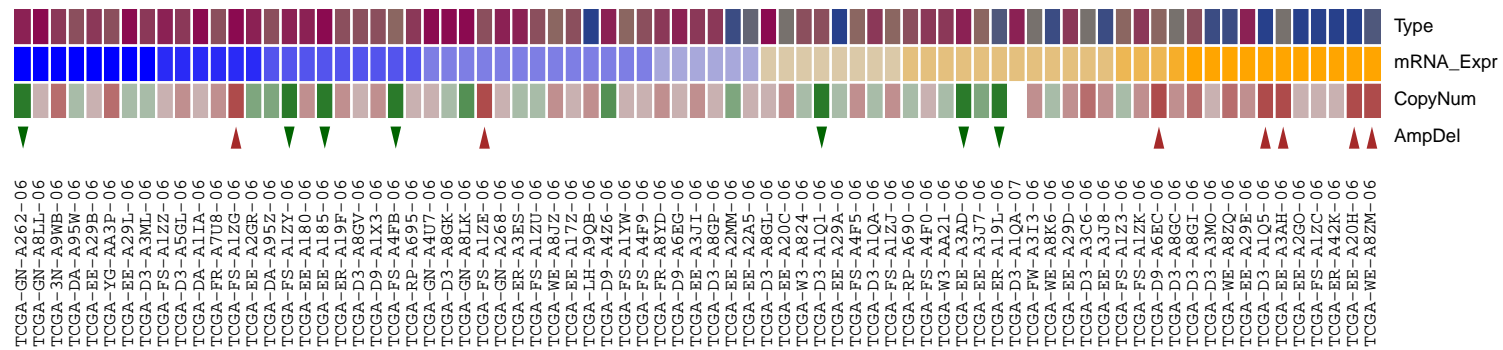

# EPHB2

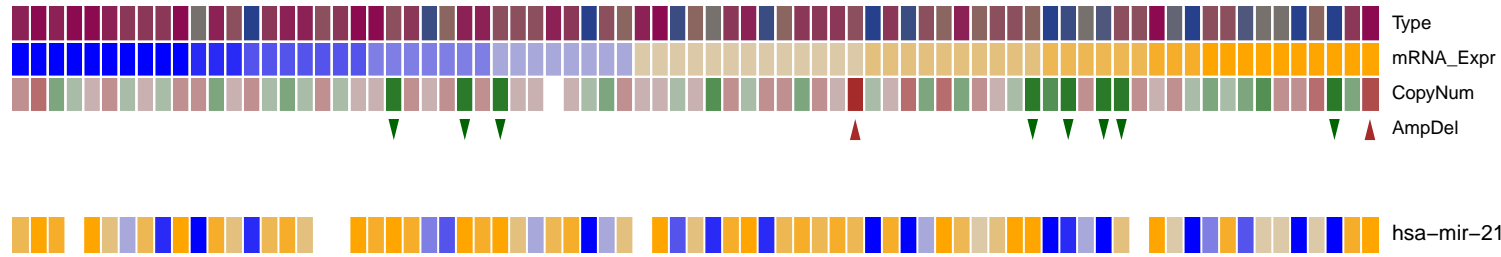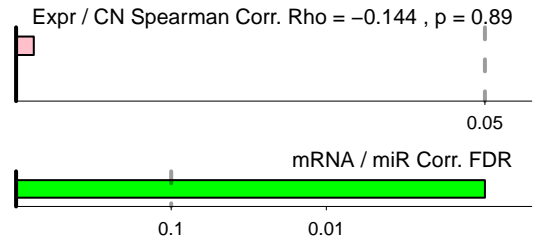

1 : 23036727  
1 : 23036868  
1 : 23036980  
1 : 23037116  
1 : 23037368  
1 : 23038321  
1 : 23038361  
1 : 23038925  
1 : 23040723  
1 : 23061564  
1 : 23067453  
1 : 23080947  
1 : 23089658  
1 : 23097476  
1 : 23105148  
1 : 23105600  
1 : 23108861  
1 : 23109881  
1 : 23111011  
1 : 23111123  
1 : 2311269  
1 : 2311484  
1 : 2311493  
1 : 23115536  
1 : 23122112  
1 : 23135043  
1 : 23142734  
1 : 23153308  
1 : 23162550  
1 : 23181832  
1 : 23191470  
1 : 23191576  
1 : 23191664  
1 : 23197180  
1 : 23203462

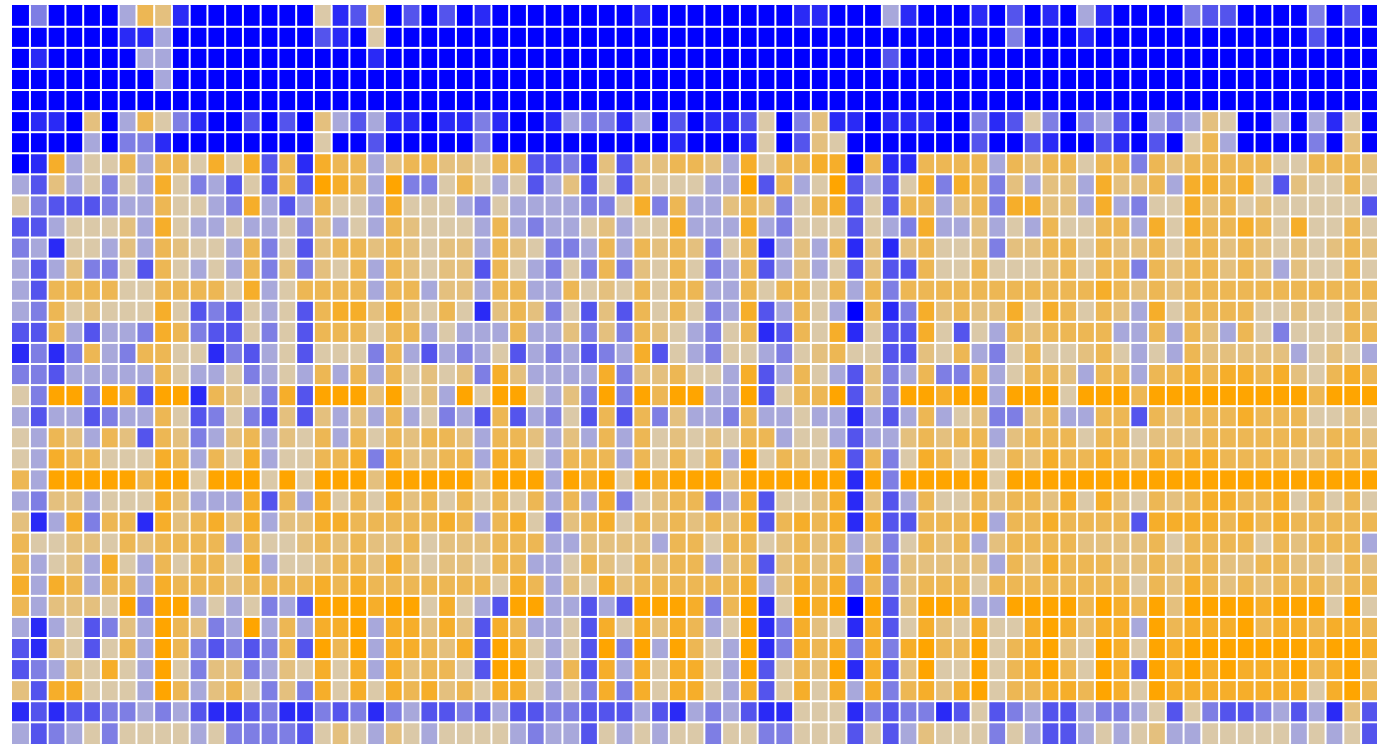

cg01970575  
cg00937518  
cg14271400  
cg00396230  
cg00650762  
cg26255052  
cg22089024  
cg00831127  
cg07952381  
cg05266663  
cg11248999  
cg15639556  
cg05228361  
cg22702922  
cg20149170  
cg02974898  
cg14787964  
cg04099056  
cg05340339  
cg05229416  
cg08539251  
cg09463984  
cg09136099  
cg13988448  
cg12717584  
cg22931642  
cg13378083  
cg18156963  
cg15447913  
cg04914283  
cg24368899  
cg12046053  
cg08859698  
cg08264906  
cg26671246

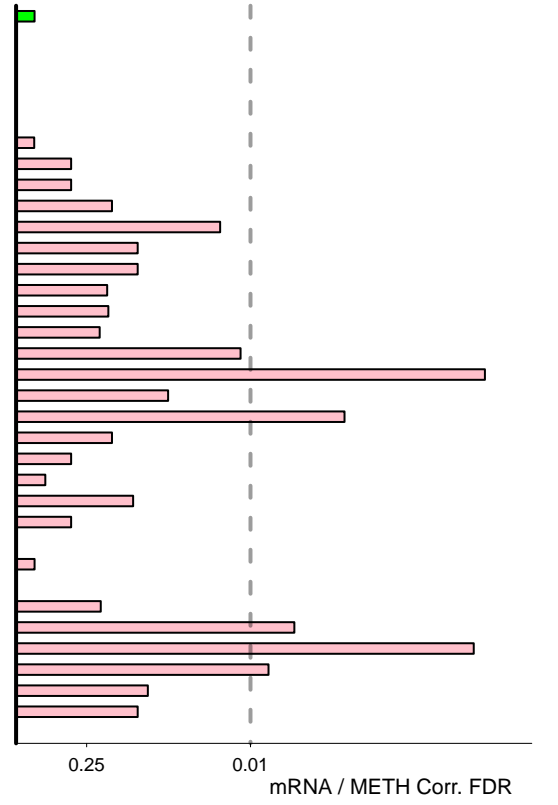

GeneLoc  
PromoterAssoc  
CpGIsland

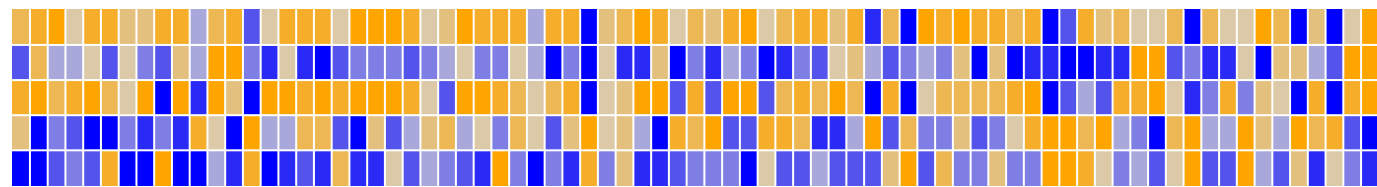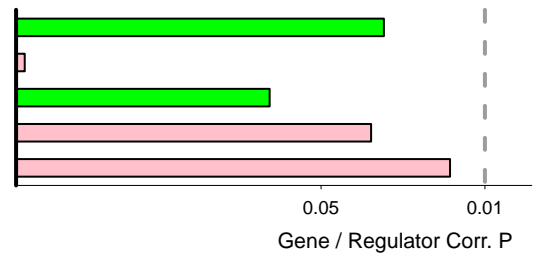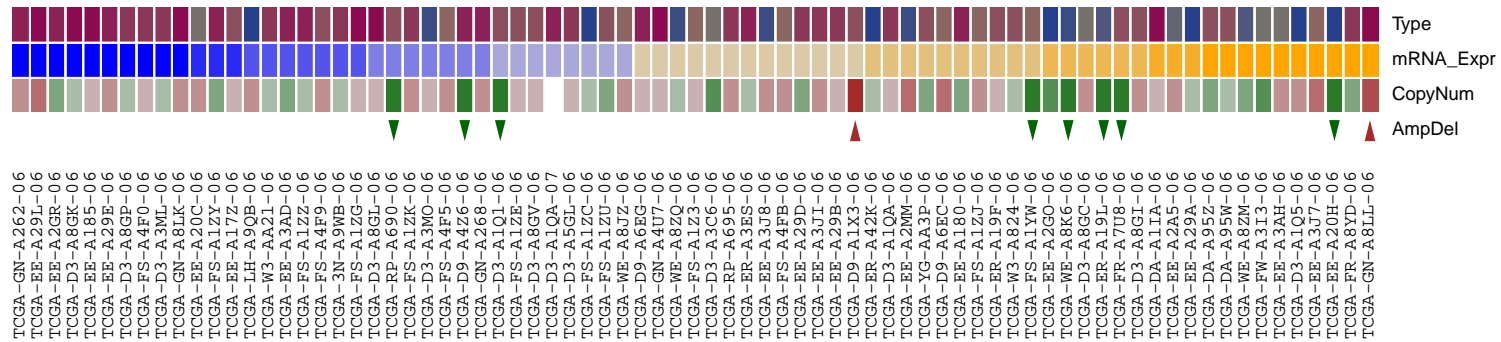

# TFPI

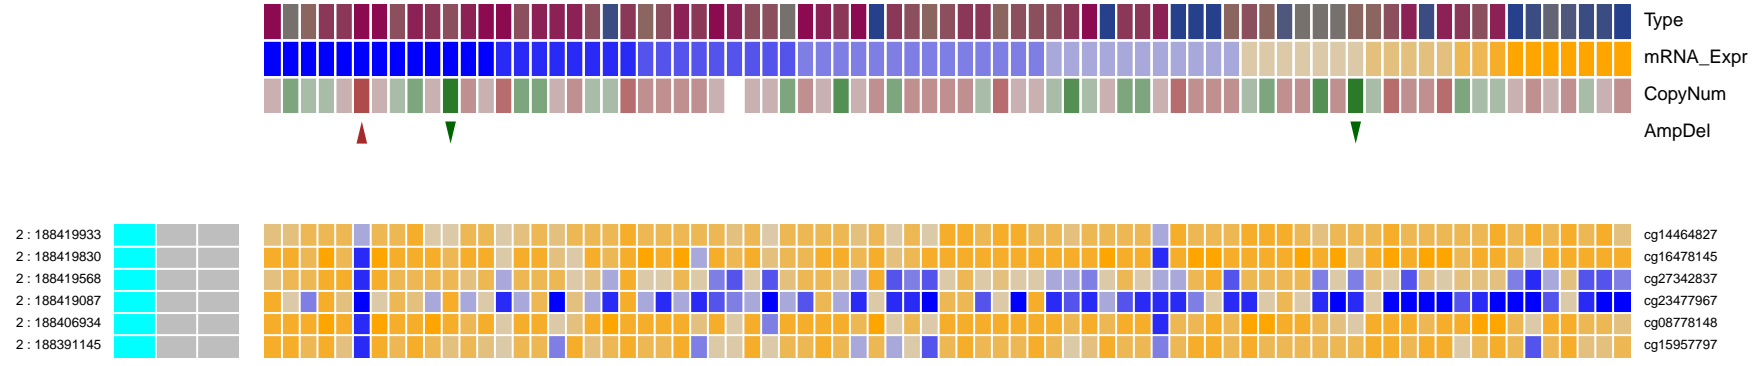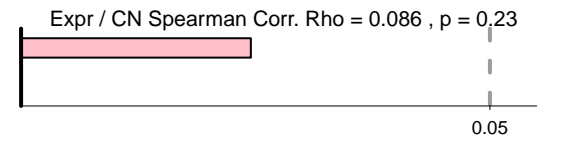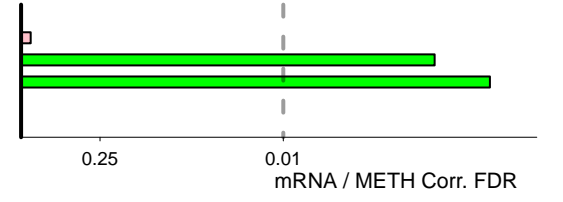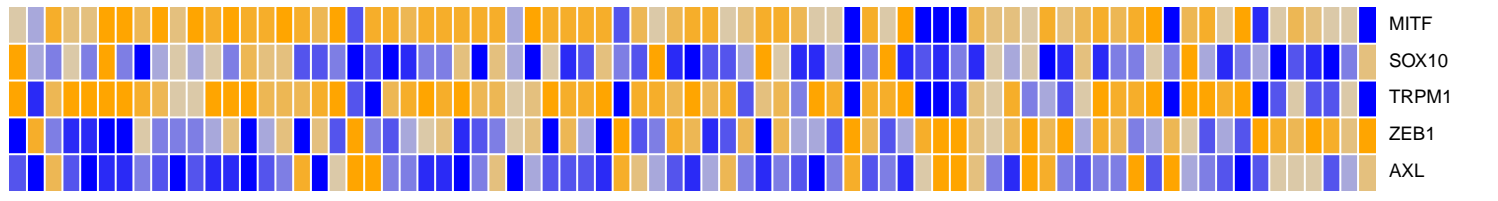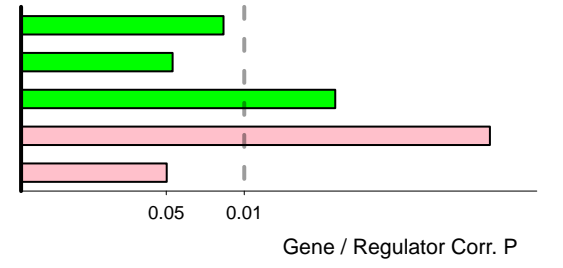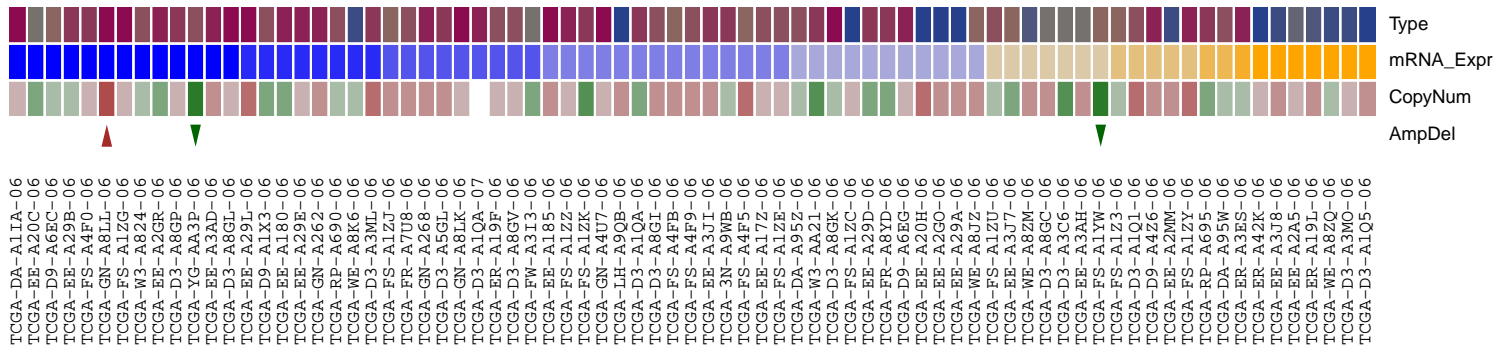

# NTM

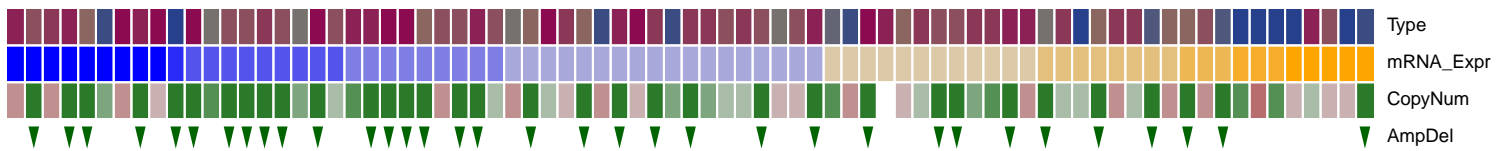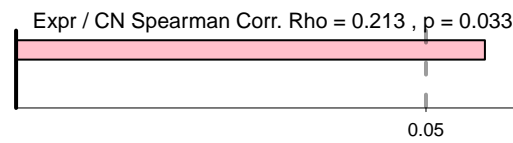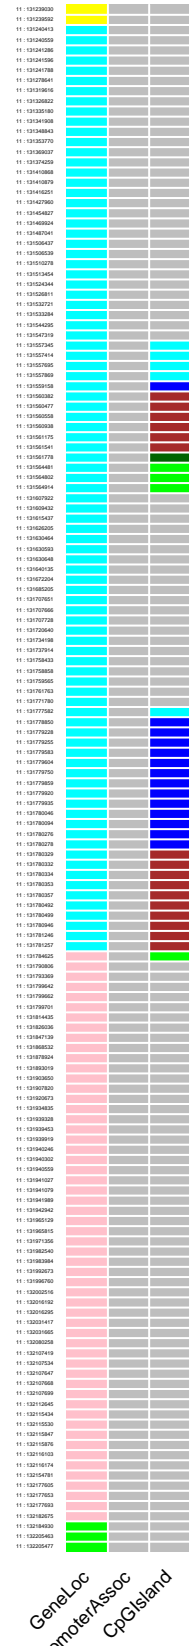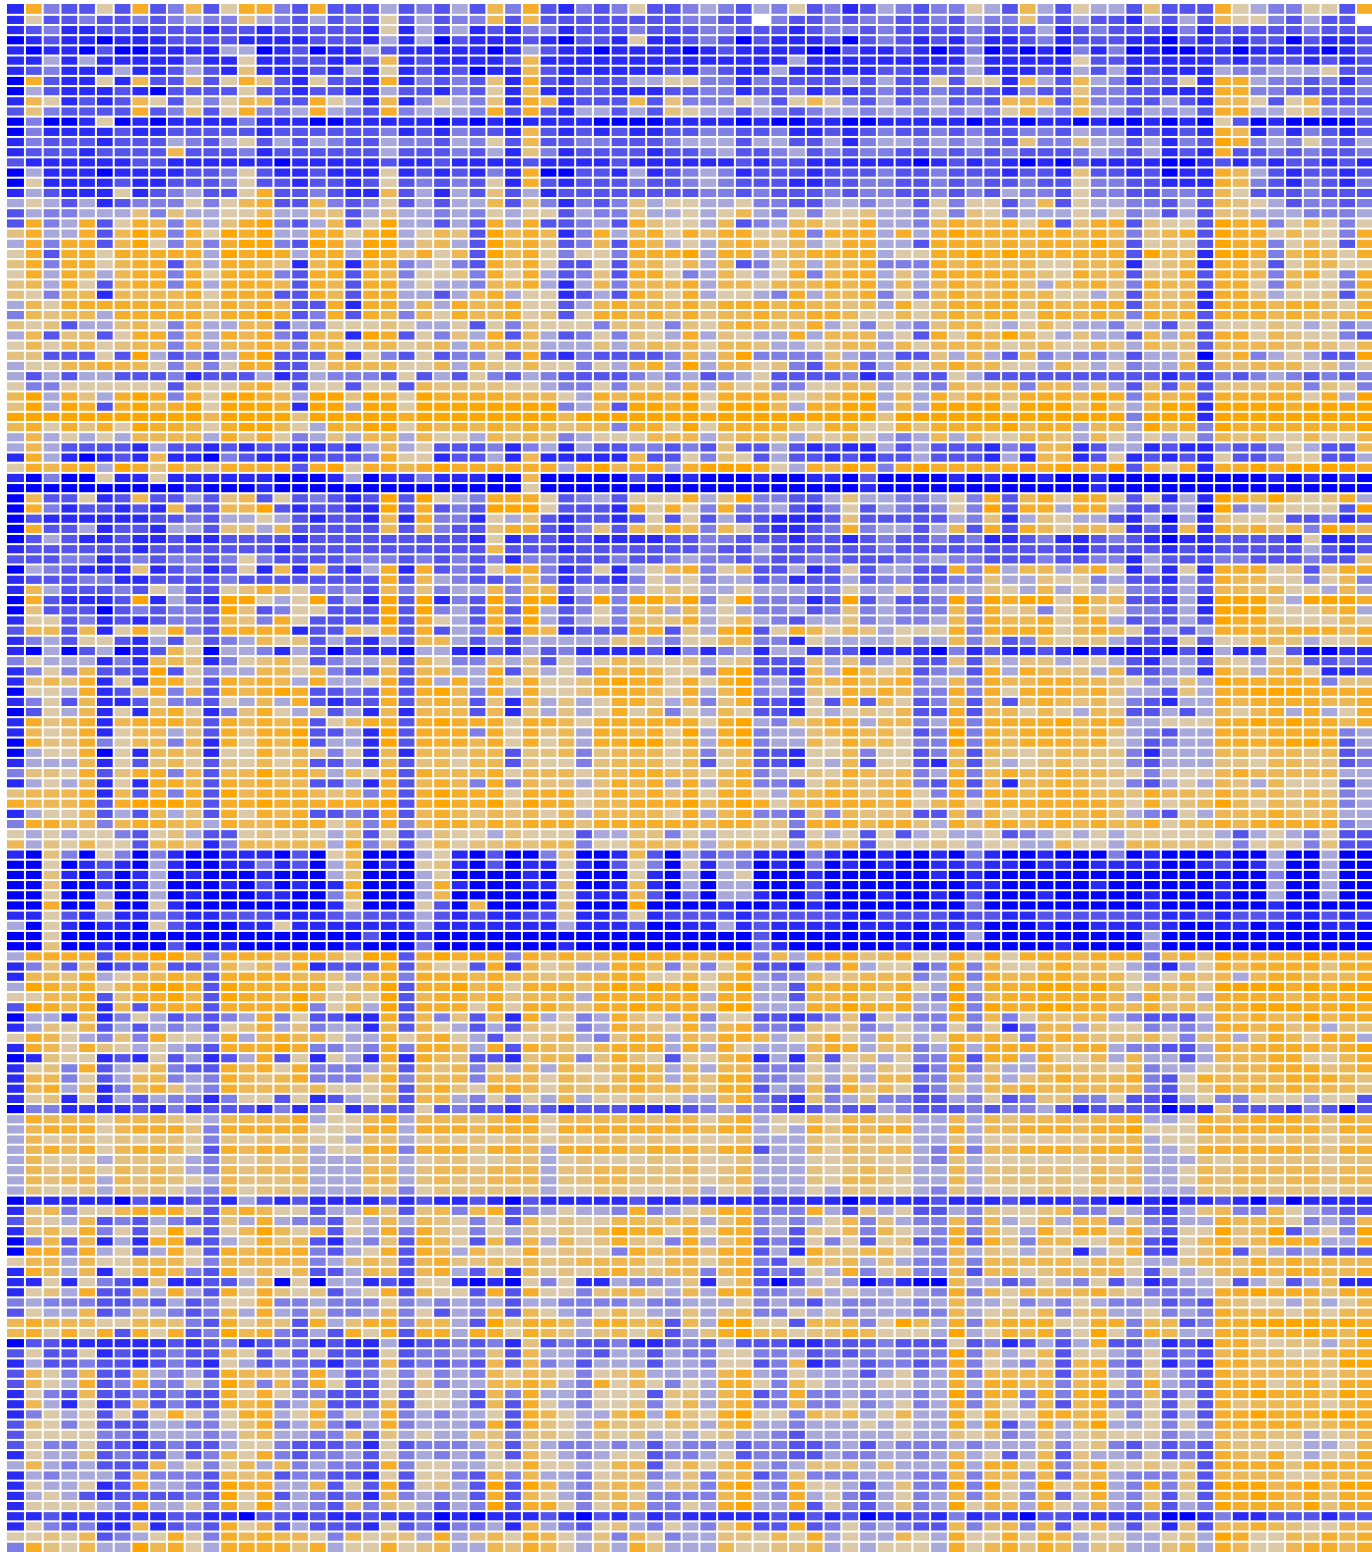

hg444812  
hg444813  
hg444814  
hg444815  
hg444816  
hg444817  
hg444818  
hg444819  
hg444820  
hg444821  
hg444822  
hg444823  
hg444824  
hg444825  
hg444826  
hg444827  
hg444828  
hg444829  
hg444830  
hg444831  
hg444832  
hg444833  
hg444834  
hg444835  
hg444836  
hg444837  
hg444838  
hg444839  
hg444840  
hg444841  
hg444842  
hg444843  
hg444844  
hg444845  
hg444846  
hg444847  
hg444848  
hg444849  
hg444850  
hg444851  
hg444852  
hg444853  
hg444854  
hg444855  
hg444856  
hg444857  
hg444858  
hg444859  
hg444860  
hg444861  
hg444862  
hg444863  
hg444864  
hg444865  
hg444866  
hg444867  
hg444868  
hg444869  
hg444870  
hg444871  
hg444872  
hg444873  
hg444874  
hg444875  
hg444876  
hg444877  
hg444878  
hg444879  
hg444880  
hg444881  
hg444882  
hg444883  
hg444884  
hg444885  
hg444886  
hg444887  
hg444888  
hg444889  
hg444890  
hg444891  
hg444892  
hg444893  
hg444894  
hg444895  
hg444896  
hg444897  
hg444898  
hg444899  
hg444900  
hg444901  
hg444902  
hg444903  
hg444904  
hg444905  
hg444906  
hg444907  
hg444908  
hg444909  
hg444910  
hg444911  
hg444912  
hg444913  
hg444914  
hg444915  
hg444916  
hg444917  
hg444918  
hg444919  
hg444920  
hg444921  
hg444922  
hg444923  
hg444924  
hg444925  
hg444926  
hg444927  
hg444928  
hg444929  
hg444930  
hg444931  
hg444932  
hg444933  
hg444934  
hg444935  
hg444936  
hg444937  
hg444938  
hg444939  
hg444940  
hg444941  
hg444942  
hg444943  
hg444944  
hg444945  
hg444946  
hg444947  
hg444948  
hg444949  
hg444950  
hg444951  
hg444952  
hg444953  
hg444954  
hg444955  
hg444956  
hg444957  
hg444958  
hg444959  
hg444960  
hg444961  
hg444962  
hg444963  
hg444964  
hg444965  
hg444966  
hg444967  
hg444968  
hg444969  
hg444970  
hg444971  
hg444972  
hg444973  
hg444974  
hg444975  
hg444976  
hg444977  
hg444978  
hg444979  
hg444980  
hg444981  
hg444982  
hg444983  
hg444984  
hg444985  
hg444986  
hg444987  
hg444988  
hg444989  
hg444990  
hg444991  
hg444992  
hg444993  
hg444994  
hg444995  
hg444996  
hg444997  
hg444998  
hg444999  
hg445000

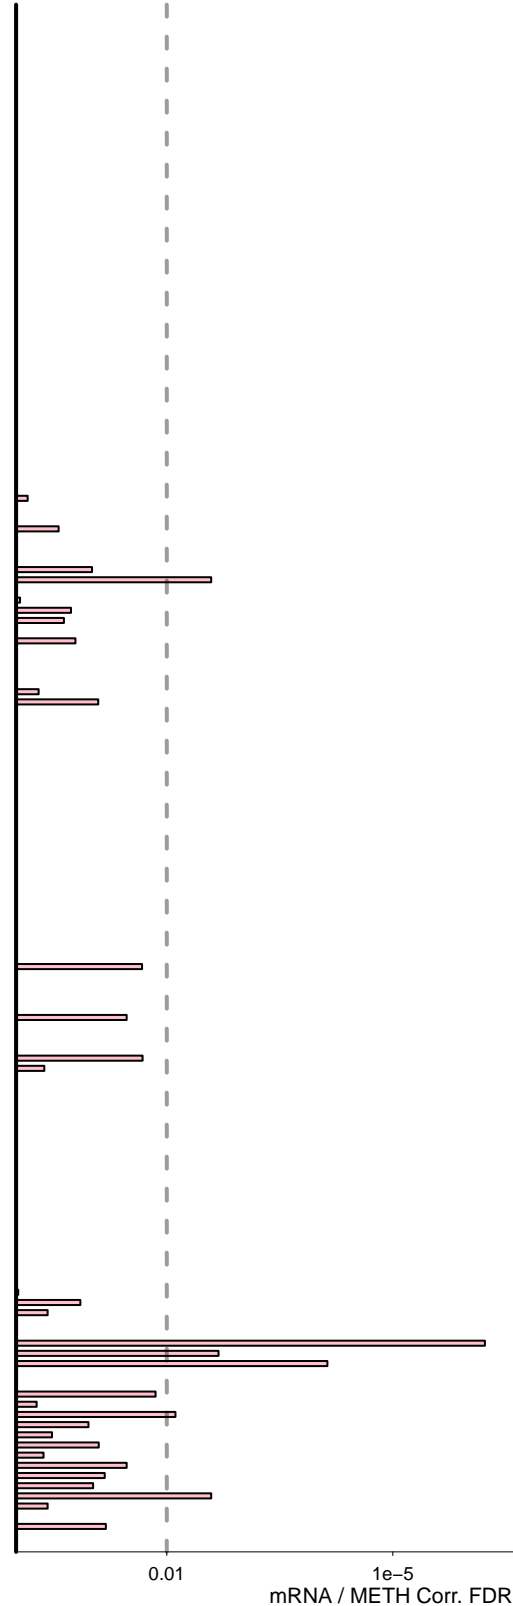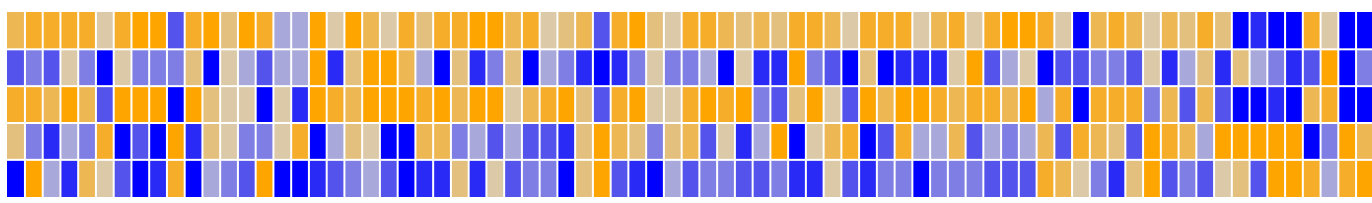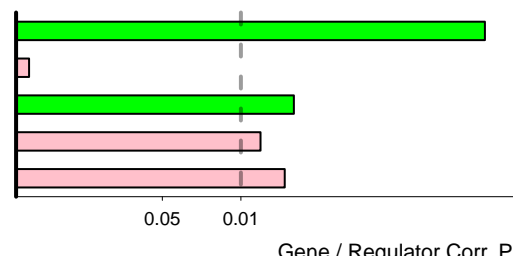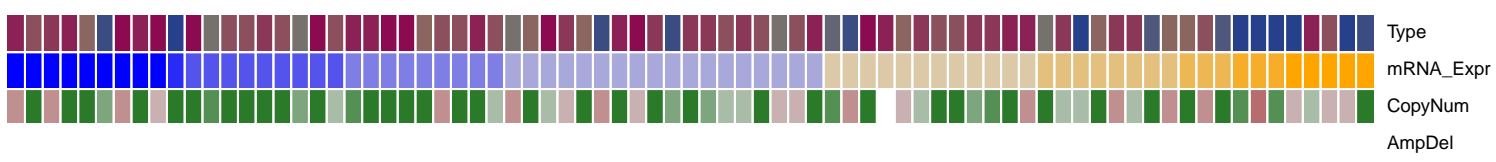

TCGA-CN-A262-06  
TCGA-D3-A1Q1-06  
TCGA-EE-A3J1-06  
TCGA-EE-A3AD-06  
TCGA-D9-A6EC-06  
TCGA-EE-A3J8-06  
TCGA-EE-A185-06  
TCGA-ER-A3ES-06  
TCGA-LH-A90B-06  
TCGA-CN-A8LK-06  
TCGA-FW-A3I3-06  
TCGA-FS-A1ZU-06  
TCGA-YG-A3AP-06  
TCGA-D3-A3MI-06  
TCGA-D3-A8GV-06  
TCGA-EE-A2OC-06  
TCGA-CN-A8L1-06  
TCGA-DA-A95N-06  
TCGA-EE-A150-06  
TCGA-FS-A1Z1-06  
TCGA-DA-A1LA-06  
TCGA-EE-A29L-06  
TCGA-EE-A3J7-06  
TCGA-FS-A4F9-06  
TCGA-D9-A6EG-06  
TCGA-EE-A3AH-06  
TCGA-FS-A1ZJ-06  
TCGA-WE-A8JZ-06  
TCGA-FS-A4F0-06  
TCGA-WE-A8K6-06  
TCGA-D3-A8GL-06  
TCGA-D3-A8GP-06  
TCGA-D3-A3MO-06  
TCGA-EE-A29D-06  
TCGA-RP-A695-06  
TCGA-EE-A29B-06  
TCGA-DA-A95Z-06  
TCGA-EE-A17Z-06  
TCGA-WE-A2A5-06  
TCGA-EE-A285-06  
TCGA-CN-A8I7-06  
TCGA-D3-A1QA-07  
TCGA-FS-A1Y0-06  
TCGA-W3-A8A1-06  
TCGA-FR-A7J8-06  
TCGA-FS-A1ZE-06  
TCGA-FR-A81D-06  
TCGA-EE-A2GR-06  
TCGA-D9-A4Z6-06  
TCGA-D3-A8GC-06  
TCGA-3N-A9WB-06  
TCGA-EE-A2DH-06  
TCGA-FS-A1Z3-06  
TCGA-D3-A5GL-06  
TCGA-WE-A8ZM-06  
TCGA-FS-A4F5-06  
TCGA-D9-A1X3-06  
TCGA-ER-A19L-06  
TCGA-D3-A1Q5-06  
TCGA-EE-A29A-06  
TCGA-EE-A29E-06  
TCGA-EE-A29E-06  
TCGA-D3-A8G1-06  
TCGA-FS-A1ZC-06  
TCGA-EE-A2MM-06

# TLE4

9 : 82185137  
 9 : 82185498  
 9 : 82186418  
 9 : 82186769  
 9 : 82186806  
 9 : 82186884  
 9 : 82187209  
 9 : 82187670  
 9 : 82187855  
 9 : 82187938  
 9 : 82187997  
 9 : 82188393  
 9 : 82188559  
 9 : 82278827  
 9 : 82299929  
 9 : 82308107

GeneLoc  
 PromoterAssoc  
 CpGIsland

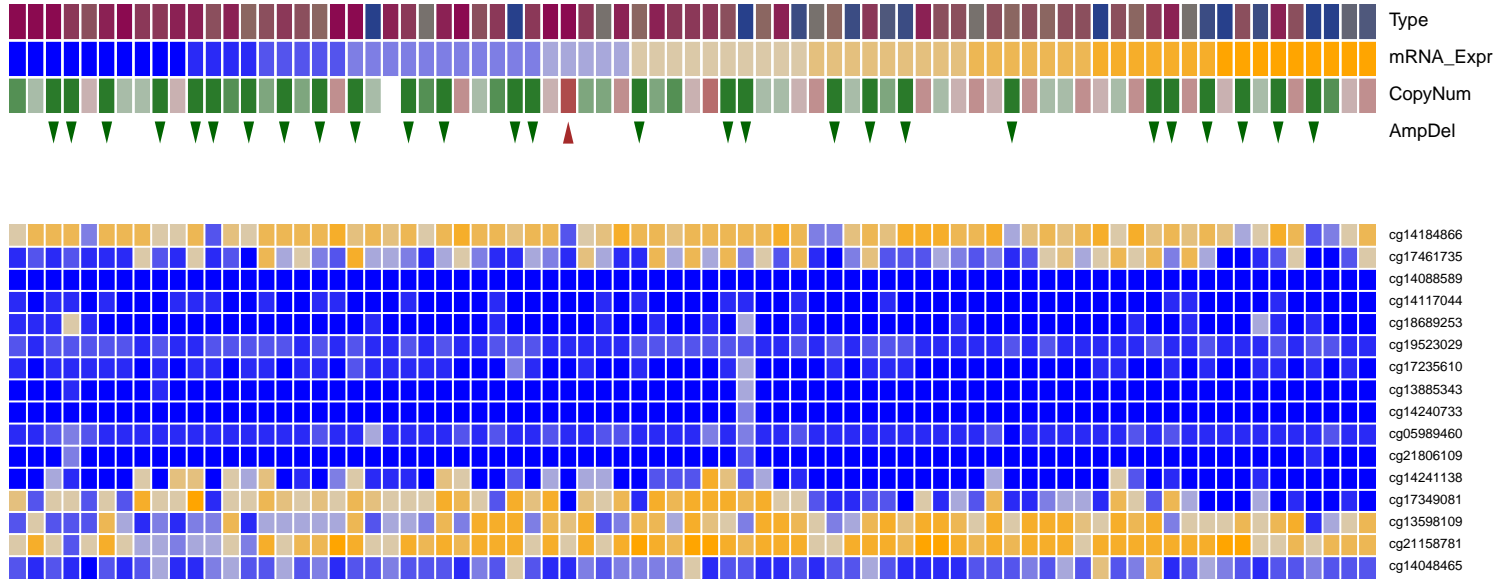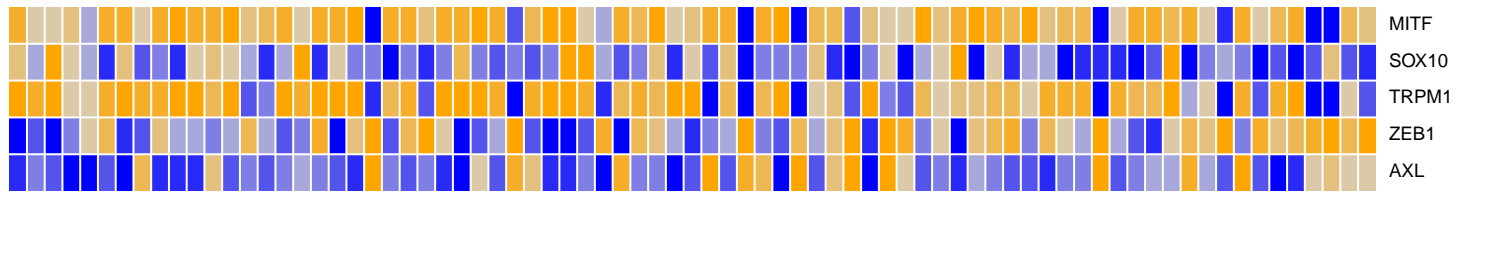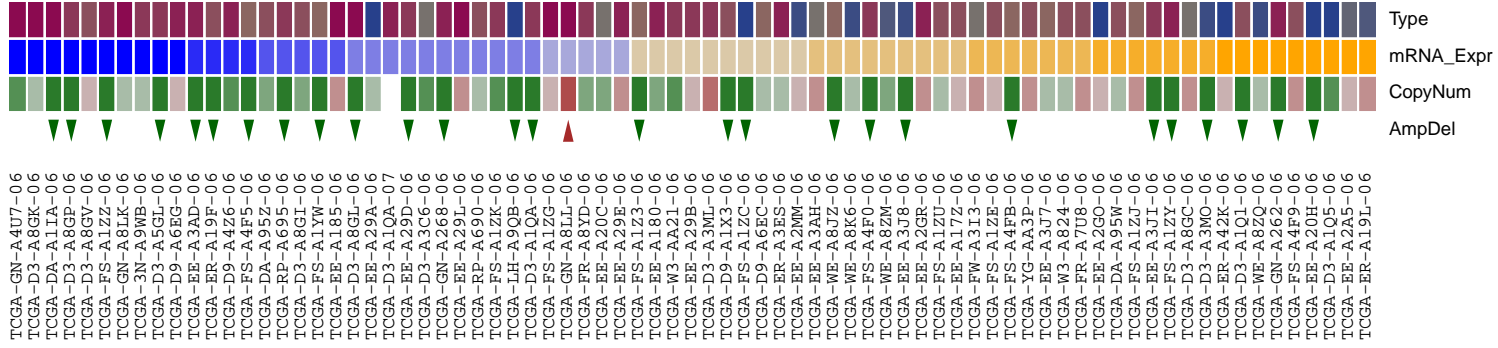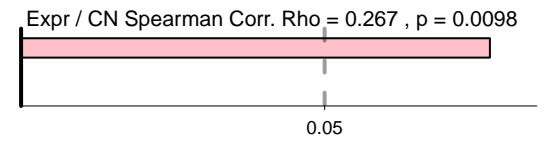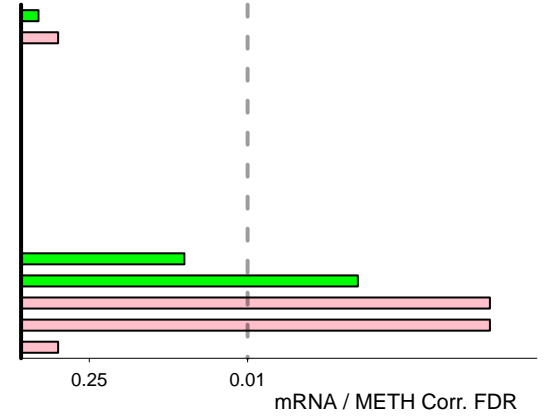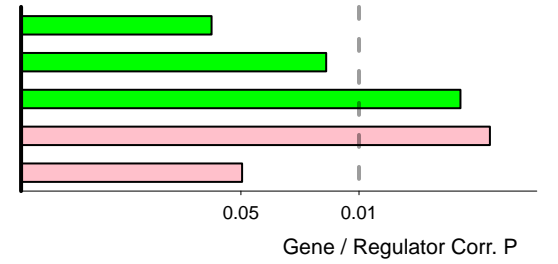

# COL5A1

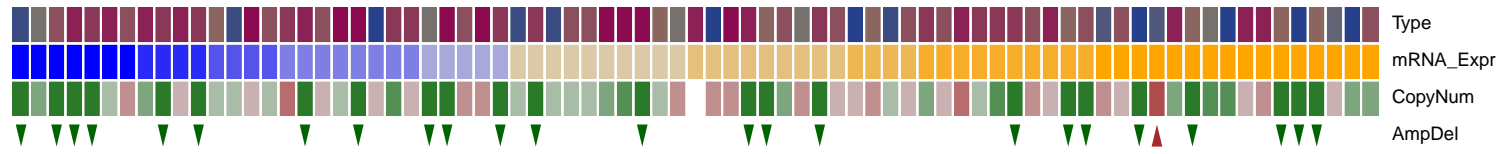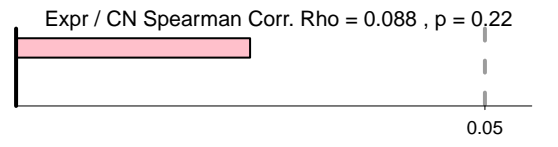

9 : 137533141  
 9 : 137533309  
 9 : 137533360  
 9 : 137533366  
 9 : 137533851  
 9 : 137533949  
 9 : 137534945  
 9 : 137535210  
 9 : 137553680  
 9 : 137562493  
 9 : 137573214  
 9 : 137592633  
 9 : 137594239  
 9 : 137599175  
 9 : 137609455  
 9 : 137611646  
 9 : 137615839  
 9 : 137616610  
 9 : 137620443  
 9 : 137621048  
 9 : 137623830  
 9 : 137623929  
 9 : 137624093  
 9 : 137624816  
 9 : 137645730  
 9 : 137646141  
 9 : 137648376  
 9 : 137650095  
 9 : 137657798  
 9 : 137658595  
 9 : 137659754  
 9 : 137660514  
 9 : 137660670  
 9 : 137661460  
 9 : 137662888  
 9 : 137667199  
 9 : 137667343  
 9 : 137673051  
 9 : 137673708  
 9 : 137673894  
 9 : 137675380  
 9 : 137675723  
 9 : 137684506  
 9 : 137693053  
 9 : 137693277  
 9 : 137694578  
 9 : 137701344  
 9 : 137707040  
 9 : 137708713  
 9 : 137709419  
 9 : 137709429  
 9 : 137709963  
 9 : 137710161  
 9 : 137711110  
 9 : 137711757  
 9 : 137712776  
 9 : 137718814  
 9 : 137718987  
 9 : 137719284  
 9 : 137719300  
 9 : 137723167  
 9 : 137726903  
 9 : 137727338  
 9 : 137730205  
 9 : 137730343  
 9 : 137731025  
 9 : 137731074  
 9 : 137731180  
 9 : 137731880  
 9 : 137733866  
 9 : 137734338  
 9 : 137736684

GeneLoc  
 PromoterAssoc  
 CpGIsland

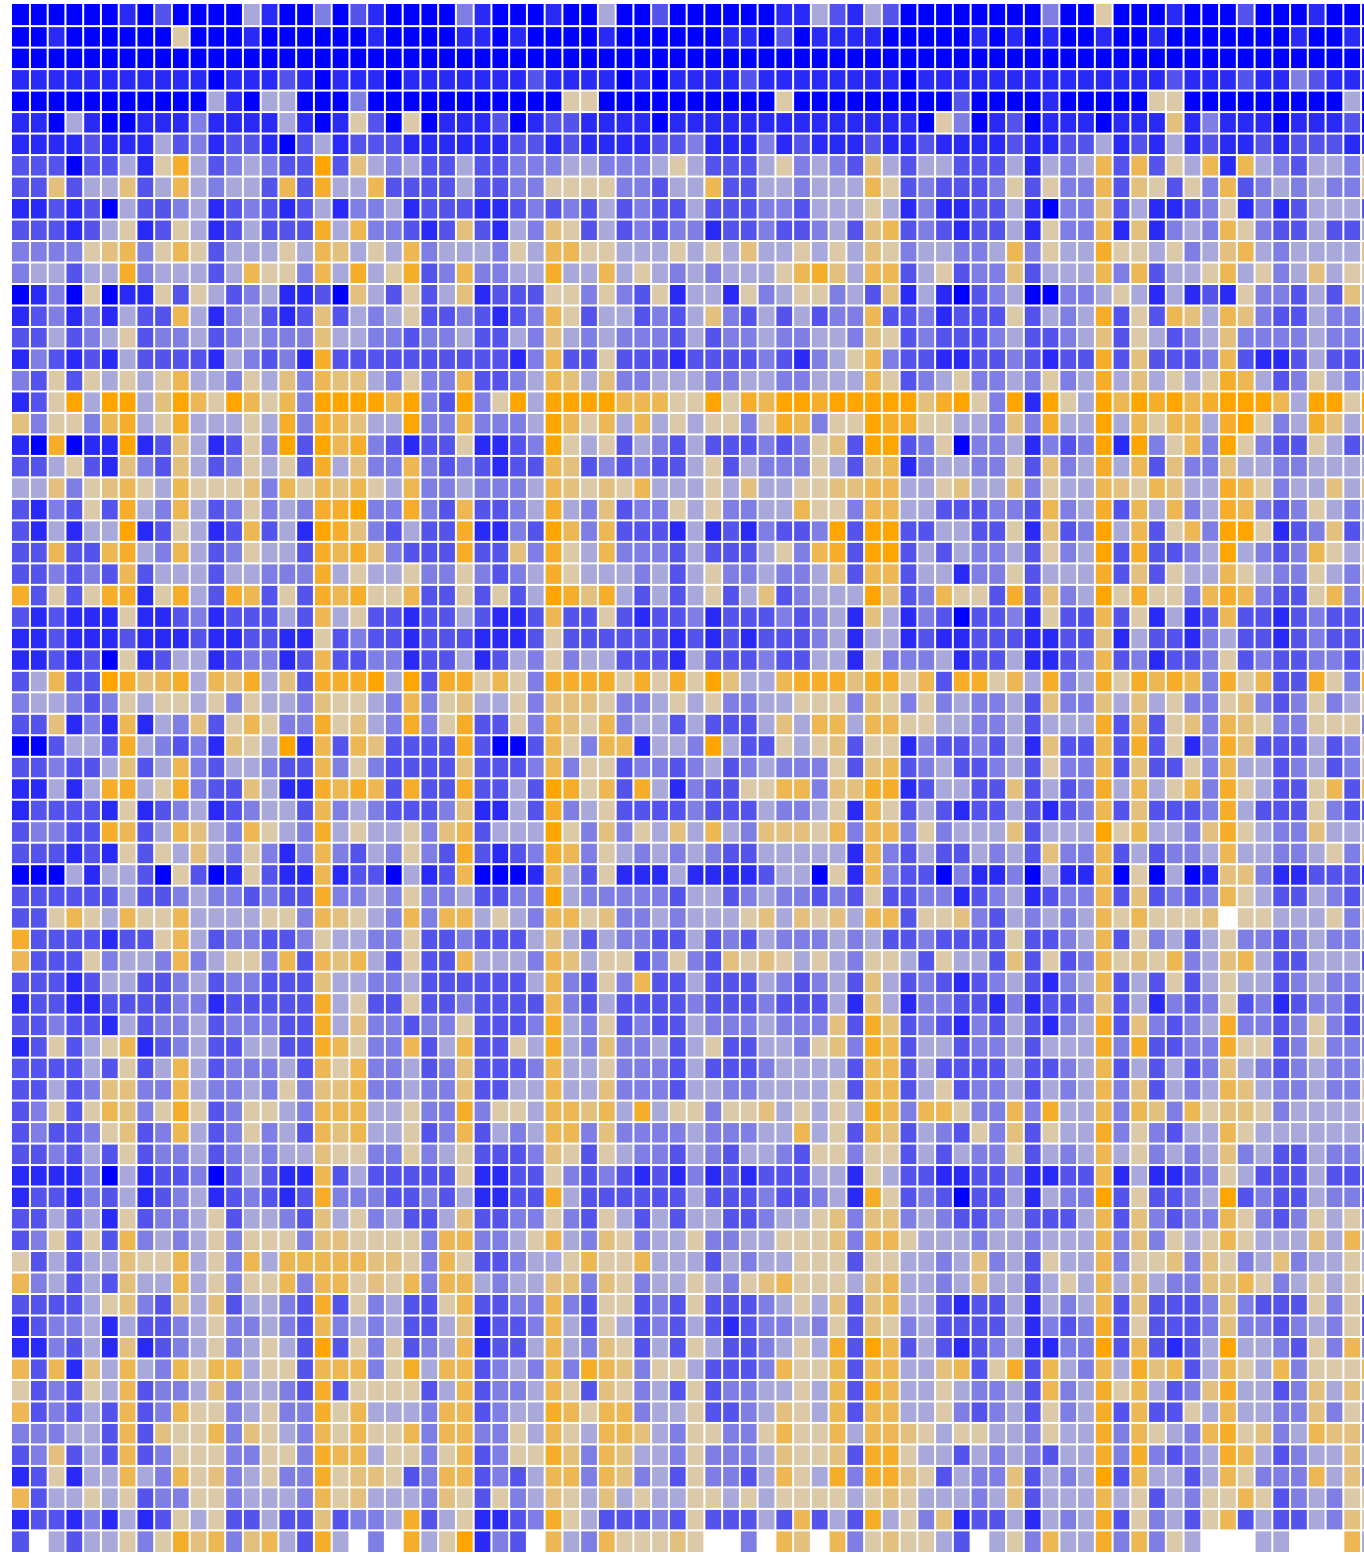

cg01753595  
 cg13499271  
 cg13754661  
 cg03298938  
 cg14252519  
 cg26024843  
 cg13496596  
 cg13618741  
 cg13698865  
 cg13516654  
 cg21229975  
 cg13984701  
 cg14021321  
 cg14482968  
 cg14228756  
 cg13749670  
 cg13816042  
 cg13579826  
 cg14454440  
 cg14355794  
 cg13639452  
 cg13438095  
 cg14194478  
 cg13492737  
 cg21170085  
 cg13717540  
 cg14070775  
 cg13913654  
 cg13987700  
 cg141113739  
 cg04568819  
 cg03430597  
 cg14399122  
 cg14525703  
 cg13969662  
 cg13865347  
 cg14091896  
 cg13917918  
 cg14227731  
 cg13775295  
 cg14548802  
 cg13756251  
 cg13803559  
 cg14274542  
 cg14356362  
 cg13714791  
 cg14656180  
 cg13852948  
 cg14237069  
 cg07300559  
 cg21212713  
 cg08029329  
 cg14350693  
 cg14622967  
 cg21208686  
 cg13854962  
 cg05329720  
 cg13605536  
 cg24354213  
 cg13596983  
 cg14186948  
 cg14207613  
 cg05328939  
 cg14340852  
 cg14582636  
 cg13602761  
 cg13701355  
 cg13649103  
 cg13910822

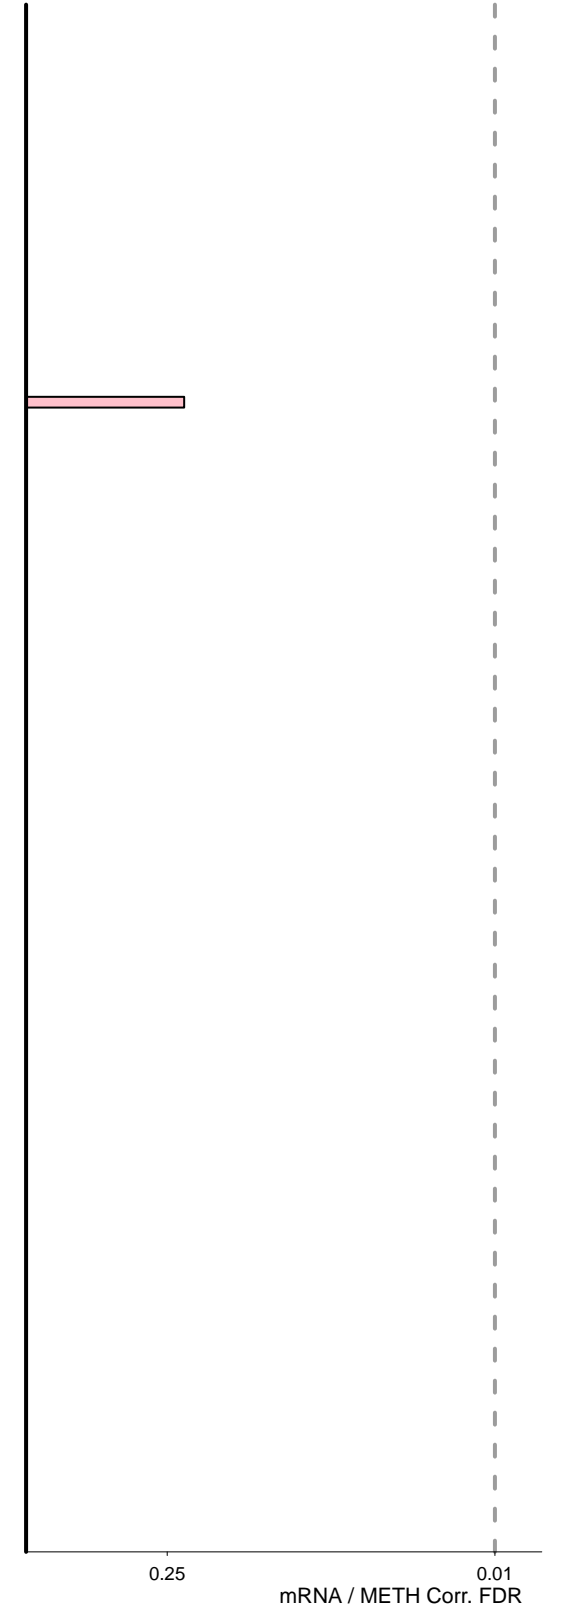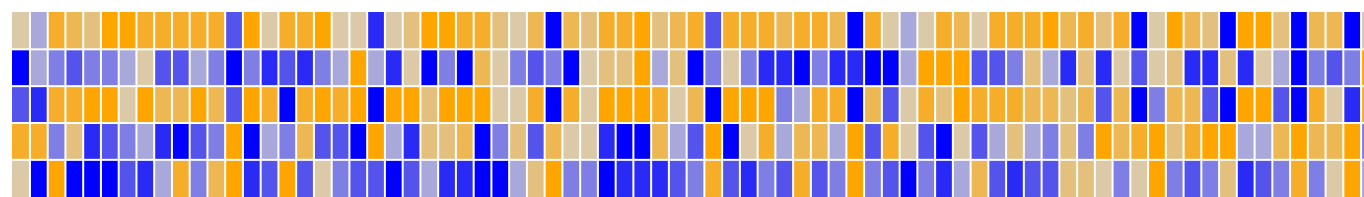

MITF  
 SOX10  
 TRPM1  
 ZEB1  
 AXL

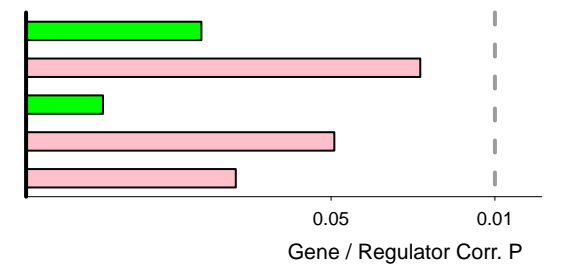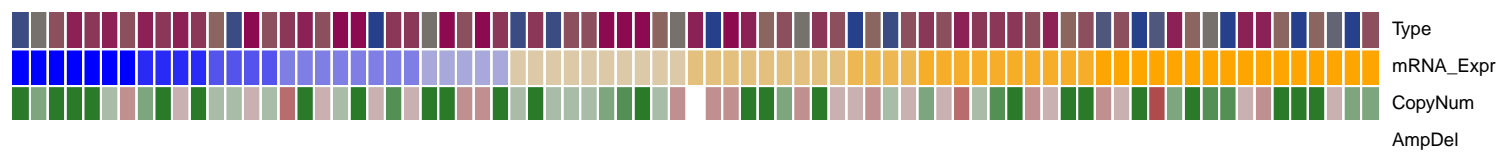

Type  
 mRNA\_Expr  
 CopyNum  
 AmpDel

TCGA-EE-A3J8-06  
 TCGA-EE-A20C-06  
 TCGA-D3-A1Q1-06  
 TCGA-GN-A262-06  
 TCGA-FS-A4F0-06  
 TCGA-ER-A3ES-06  
 TCGA-YG-AA3P-06  
 TCGA-EE-A3AD-06  
 TCGA-EE-A3J1-06  
 TCGA-EE-A29E-06  
 TCGA-EP-A695-06  
 TCGA-D9-A6EC-06  
 TCGA-WE-A8K6-06  
 TCGA-PS-A1ZG-06  
 TCGA-DA-A95W-06  
 TCGA-D3-A3M1-06  
 TCGA-FS-A1Z7-06  
 TCGA-FP-A6G0-06  
 TCGA-D3-A8GK-06  
 TCGA-DA-A1XA-06  
 TCGA-ER-A4ZA-06  
 TCGA-W3-AA21-06  
 TCGA-EE-A29F-06  
 TCGA-FW-A3I3-06  
 TCGA-D3-A8GL-06  
 TCGA-FS-A4F9-06  
 TCGA-D3-A8GP-06  
 TCGA-D3-A3NO-06  
 TCGA-EE-A2MM-06  
 TCGA-W3-A824-06  
 TCGA-FS-A1ZU-06  
 TCGA-GN-A8LK-06  
 TCGA-GN-A4U7-06  
 TCGA-EE-A3J7-06  
 TCGA-EE-A3AH-06  
 TCGA-D3-A1QA-07  
 TCGA-LH-A9OB-06  
 TCGA-EE-A185-06  
 TCGA-GN-A268-06  
 TCGA-DA-A95Z-06  
 TCGA-FS-A1YW-06  
 TCGA-D3-A8GC-06  
 TCGA-EE-A29D-06  
 TCGA-PR-A7I8-06  
 TCGA-EE-A2G0-06  
 TCGA-FS-A1Z1-06  
 TCGA-WE-A8Z0-06  
 TCGA-D3-A8GY-06  
 TCGA-FR-A81D-06  
 TCGA-EE-A1Z2-06  
 TCGA-FS-A1X1-06  
 TCGA-3N-A9WB-06  
 TCGA-FS-A1ZK-06  
 TCGA-D3-A5GL-06  
 TCGA-D9-A1X3-06  
 TCGA-EE-A2GR-06  
 TCGA-WE-A8JZ-06  
 TCGA-ER-A19F-06  
 TCGA-FS-A1ZE-06  
 TCGA-EE-A20H-06  
 TCGA-WE-A8ZM-06  
 TCGA-EE-A180-06  
 TCGA-FS-A4FB-06  
 TCGA-D3-A3C6-06  
 TCGA-D3-A1O5-06  
 TCGA-D9-A6EG-06  
 TCGA-D9-A4Z6-06  
 TCGA-FS-A4F5-06  
 TCGA-FS-A1ZC-06  
 TCGA-EE-A2A5-06  
 TCGA-EE-A29A-06  
 TCGA-D3-A8GI-06

# C12ORF75

12 : 105629518  
 12 : 105629755  
 12 : 105629798  
 12 : 105630036  
 12 : 105630059  
 12 : 105630063  
 12 : 105630205  
 12 : 105630720  
 12 : 105630771  
 12 : 105689861  
 12 : 105723904  
 12 : 105724039  
 12 : 105724273  
 12 : 105724310  
 12 : 105724410  
 12 : 105724426  
 12 : 105724534  
 12 : 105724818  
 12 : 105725112  
 12 : 105727197  
 12 : 105744023  
 12 : 105761853

GeneLoc  
 PromoterAssoc  
 CpGIsland

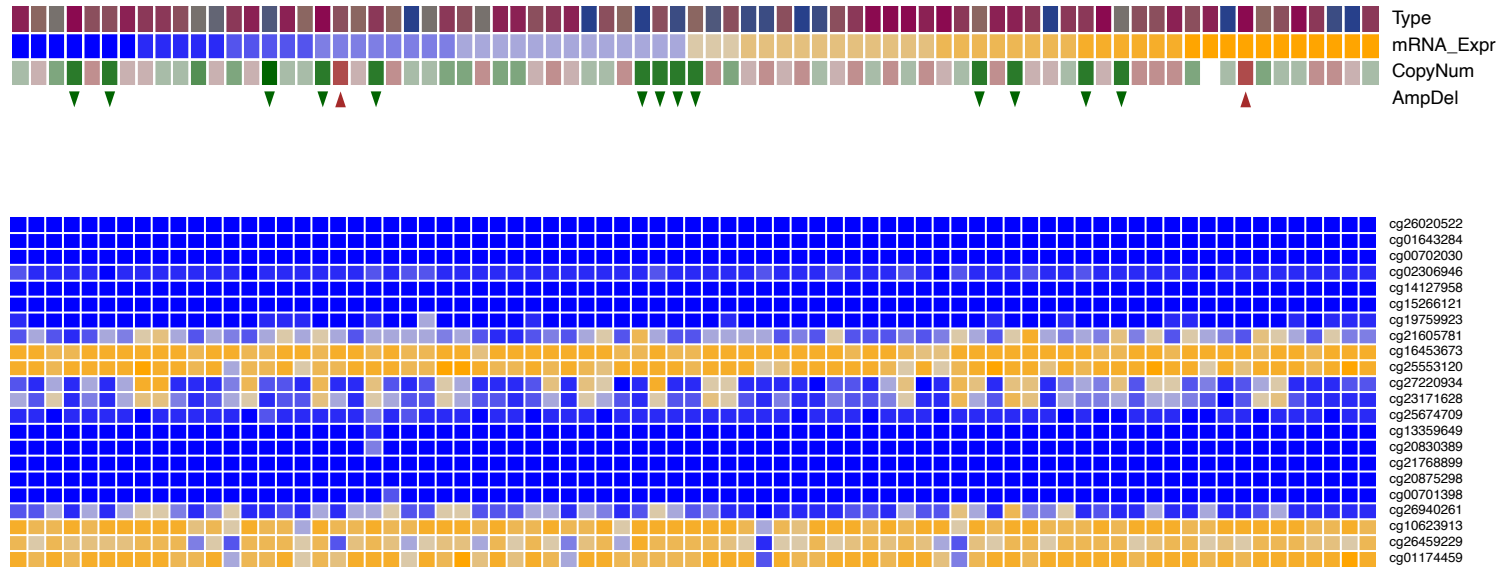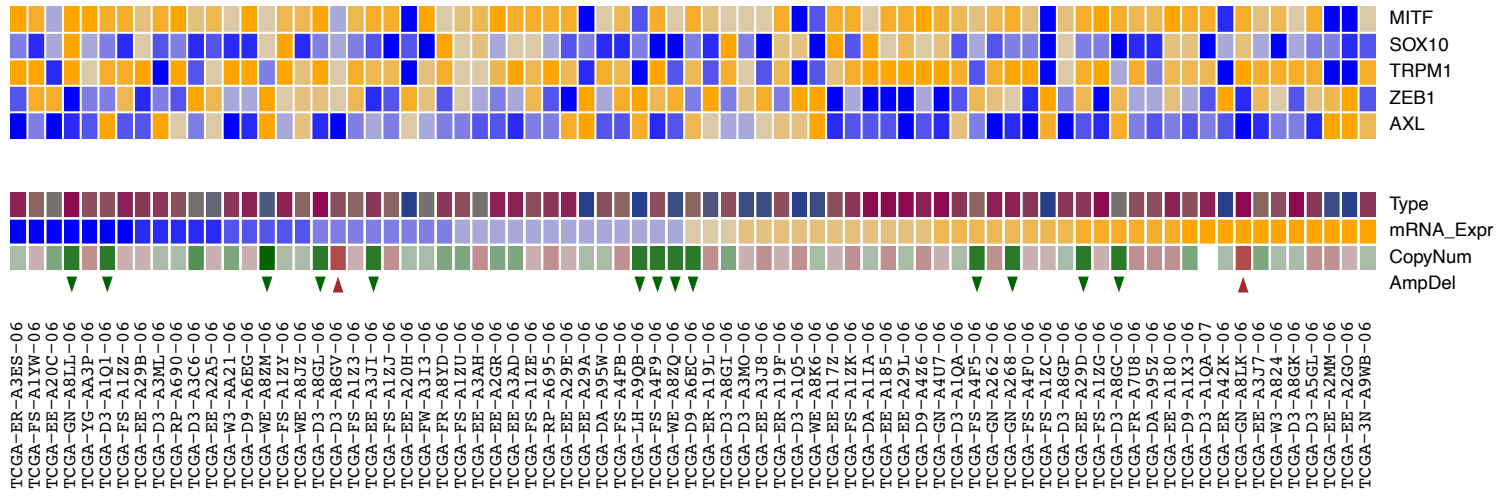

TCGA-ER-A3ES-06  
 TCGA-FS-A1YW-06  
 TCGA-EE-A20C-06  
 TCGA-CN-A8LL-06  
 TCGA-YG-AA3P-06  
 TCGA-D3-A1Q1-06  
 TCGA-FS-A1ZZ-06  
 TCGA-EE-A29B-06  
 TCGA-D3-A3ML-06  
 TCGA-RP-A690-06  
 TCGA-D3-A3C6-06  
 TCGA-EE-A2A5-06  
 TCGA-W3-AA21-06  
 TCGA-D9-A6FG-06  
 TCGA-WE-A8ZM-06  
 TCGA-FS-A1ZY-06  
 TCGA-WE-A8JZ-06  
 TCGA-D3-A8GL-06  
 TCGA-D3-A8GV-06  
 TCGA-FS-A1Z3-06  
 TCGA-EE-A3JI-06  
 TCGA-FS-A1Z1-06  
 TCGA-EE-A20H-06  
 TCGA-FW-A3I3-06  
 TCGA-FS-A1ZU-06  
 TCGA-FR-A8ID-06  
 TCGA-EE-A3AH-06  
 TCGA-EE-A2GR-06  
 TCGA-EE-A3AD-06  
 TCGA-FS-A1ZE-06  
 TCGA-RP-A695-06  
 TCGA-EE-A29F-06  
 TCGA-EE-A29A-06  
 TCGA-DA-A95W-06  
 TCGA-FS-A4FB-06  
 TCGA-LH-A9QB-06  
 TCGA-FS-A4F9-06  
 TCGA-WE-A8ZQ-06  
 TCGA-D9-A6EC-06  
 TCGA-ER-A19L-06  
 TCGA-D3-A8GI-06  
 TCGA-D3-A3MO-06  
 TCGA-EE-A3J8-06  
 TCGA-ER-A19F-06  
 TCGA-D3-A1O5-06  
 TCGA-WE-A8K6-06  
 TCGA-EE-A17Z-06  
 TCGA-FS-A1ZK-06  
 TCGA-DA-A1IA-06  
 TCGA-EE-A185-06  
 TCGA-EE-A29L-06  
 TCGA-D9-A4Z6-06  
 TCGA-CN-A4U7-06  
 TCGA-D3-A1QA-06  
 TCGA-FS-A4F5-06  
 TCGA-CN-A262-06  
 TCGA-CN-A268-06  
 TCGA-FS-A4FV-06  
 TCGA-FS-A1ZC-06  
 TCGA-D3-A8GF-06  
 TCGA-EE-A29D-06  
 TCGA-FS-A1ZG-06  
 TCGA-D3-A8GC-06  
 TCGA-FR-A7U8-06  
 TCGA-DA-A95Z-06  
 TCGA-EE-A180-06  
 TCGA-D9-A1X3-06  
 TCGA-D3-A1QA-07  
 TCGA-ER-A4ZK-06  
 TCGA-CN-A8LK-06  
 TCGA-EE-A3J7-06  
 TCGA-W3-A8Z4-06  
 TCGA-D3-A8GK-06  
 TCGA-D3-A5GL-06  
 TCGA-EE-A2MM-06  
 TCGA-EE-A25O-06  
 TCGA-3N-A9WB-06

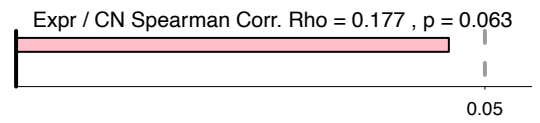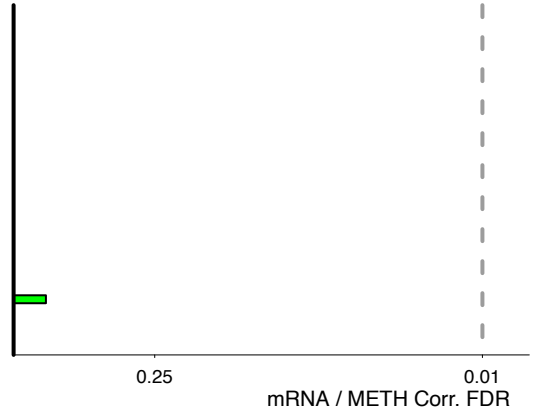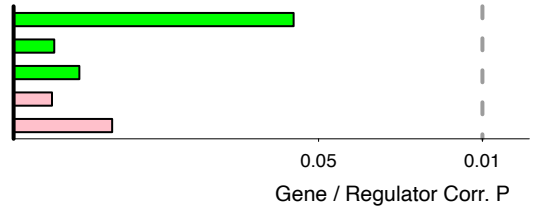

# RRAS2

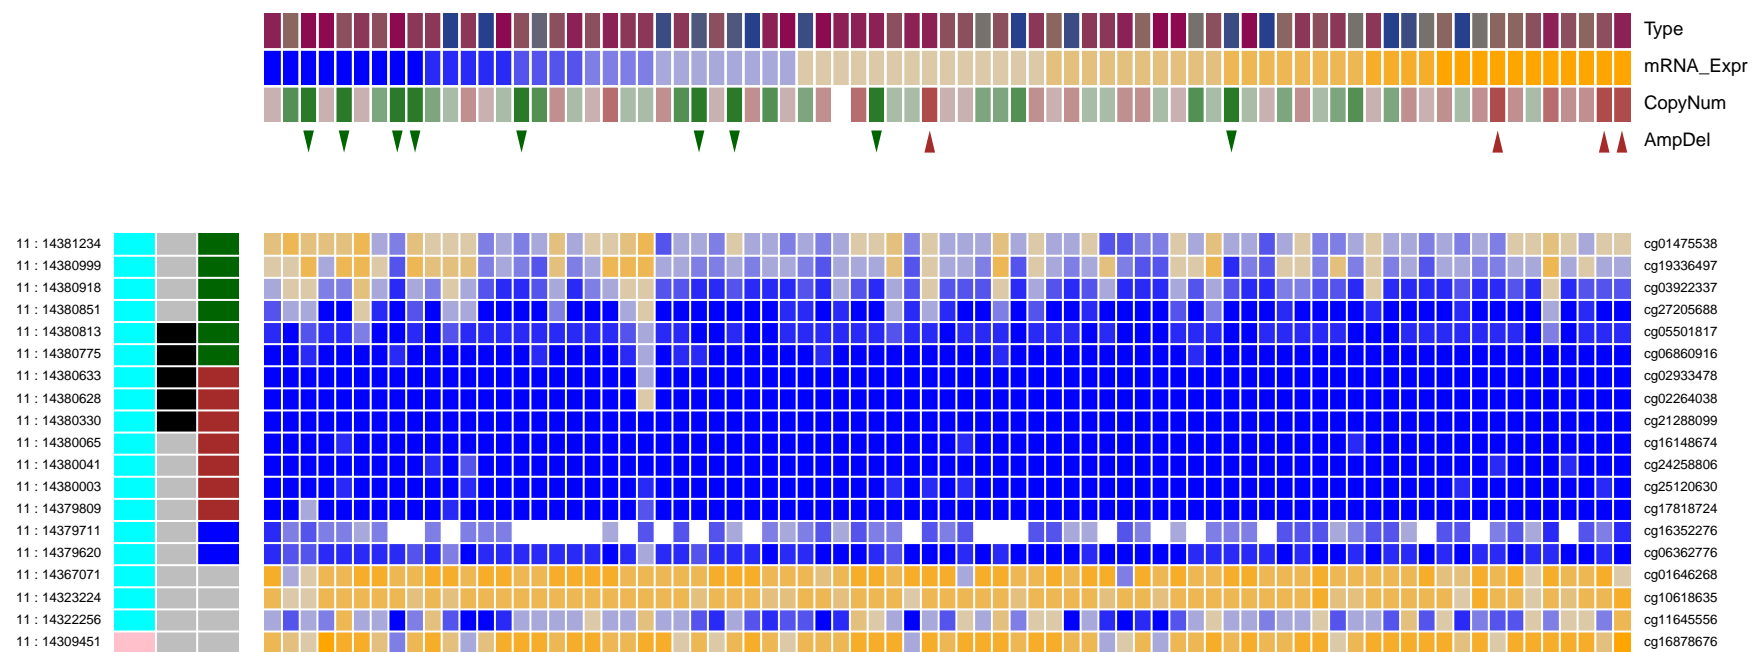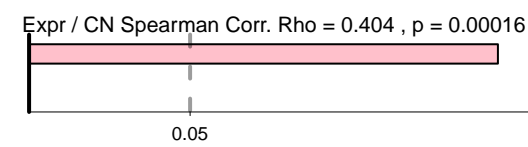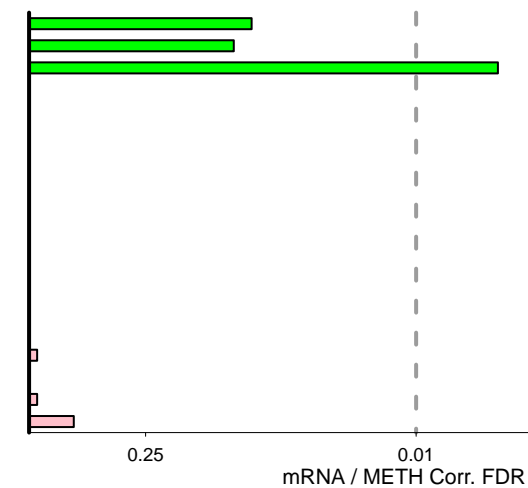

Geneloc  
PromoterAssoc  
CpGIsland

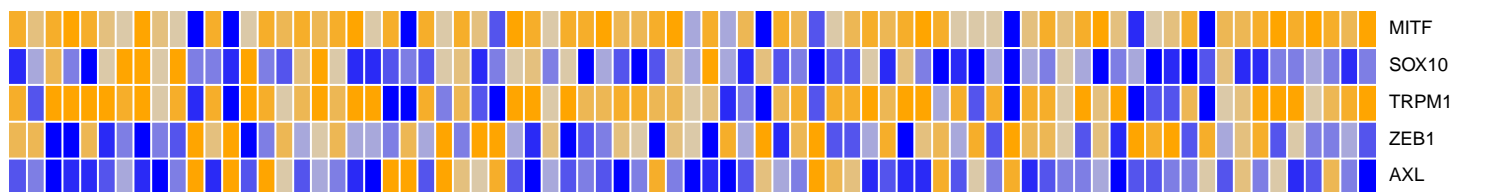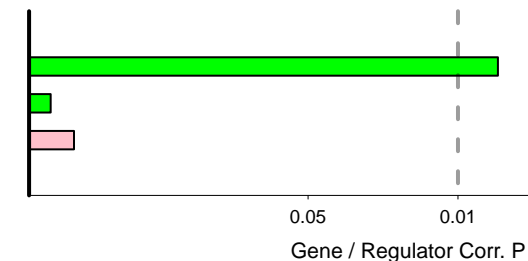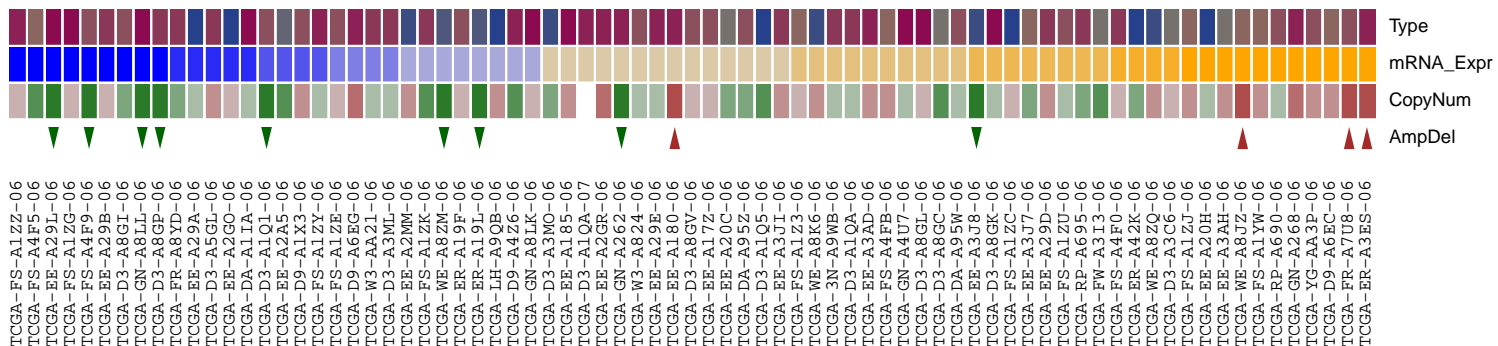

TCGA-FS-A1ZZ-06  
TCGA-FS-A4F5-06  
TCGA-EE-A29L-06  
TCGA-FS-A1ZG-06  
TCGA-FS-A4F9-06  
TCGA-EE-A29B-06  
TCGA-D3-A8GI-06  
TCGA-GN-A8LL-06  
TCGA-D3-A8GF-06  
TCGA-FR-A8YD-06  
TCGA-EE-A29A-06  
TCGA-D3-A5GI-06  
TCGA-EE-A2GO-06  
TCGA-DA-A1IA-06  
TCGA-D3-A1O1-06  
TCGA-EE-A2A5-06  
TCGA-D9-A1X3-06  
TCGA-EE-A1ZY-06  
TCGA-FS-A1ZE-06  
TCGA-D9-A6EG-06  
TCGA-W3-AA21-06  
TCGA-D3-A3ML-06  
TCGA-EE-A2MM-06  
TCGA-FS-A1ZK-06  
TCGA-WE-A8ZM-06  
TCGA-ER-A19F-06  
TCGA-ER-A19L-06  
TCGA-LH-A9QB-06  
TCGA-D9-A4Z6-06  
TCGA-GN-A8LK-06  
TCGA-D3-A3MO-06  
TCGA-EE-A185-06  
TCGA-D3-A1QA-07  
TCGA-EE-A2GR-06  
TCGA-GN-A262-06  
TCGA-W3-A824-06  
TCGA-EE-A29E-06  
TCGA-EE-A180-06  
TCGA-D3-A8GV-06  
TCGA-EE-A17Z-06  
TCGA-EE-A20C-06  
TCGA-DA-A95Z-06  
TCGA-D3-A1O5-06  
TCGA-EE-A3JI-06  
TCGA-WE-A8K6-06  
TCGA-3N-A9WB-06  
TCGA-D3-A1O8-06  
TCGA-EE-A3AD-06  
TCGA-FS-A4EB-06  
TCGA-GN-A4U7-06  
TCGA-D3-A8GL-06  
TCGA-DA-A95W-06  
TCGA-EE-A3J8-06  
TCGA-D3-A8GK-06  
TCGA-FS-A1ZC-06  
TCGA-EE-A3J7-06  
TCGA-EE-A29D-06  
TCGA-FS-A1ZU-06  
TCGA-RP-A695-06  
TCGA-FW-A3I3-06  
TCGA-FS-A4FO-06  
TCGA-ER-A42K-06  
TCGA-WE-A8ZC-06  
TCGA-D3-A3C6-06  
TCGA-FS-A1ZJ-06  
TCGA-EE-A20H-06  
TCGA-EE-A3AH-06  
TCGA-WE-A8JZ-06  
TCGA-FS-A1YW-06  
TCGA-RP-A690-06  
TCGA-GN-A268-06  
TCGA-YG-AA3P-06  
TCGA-D9-A6EC-06  
TCGA-FR-A7U8-06  
TCGA-EE-A3ES-06



# MYLK

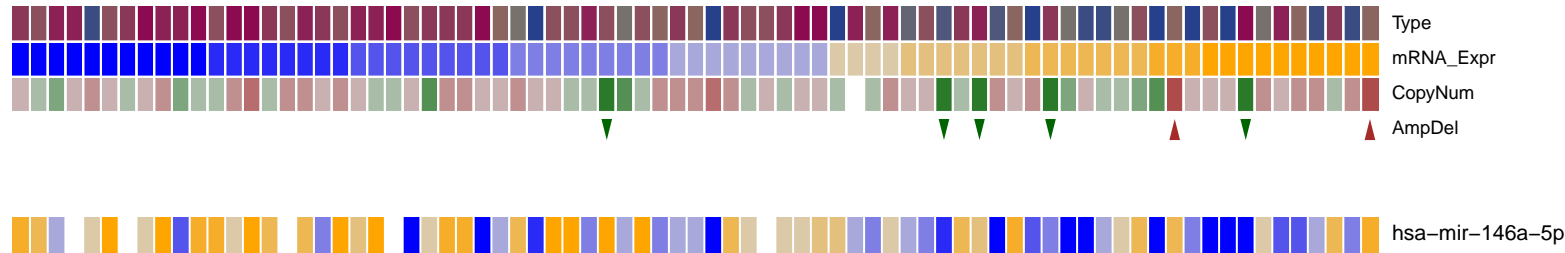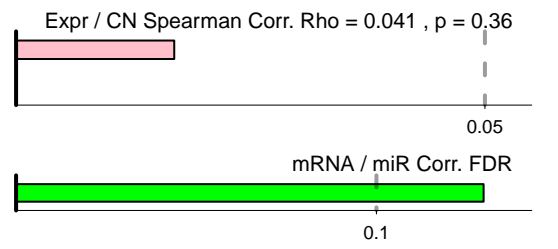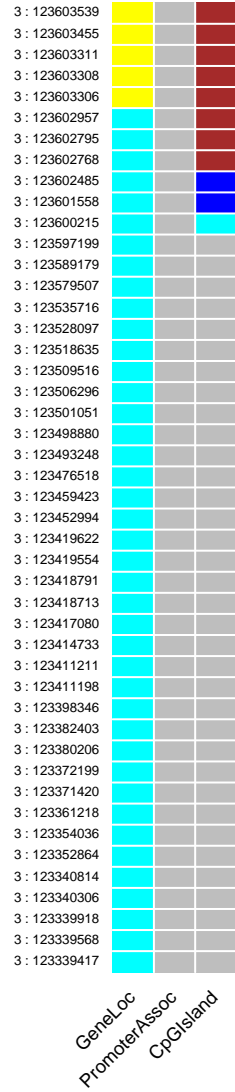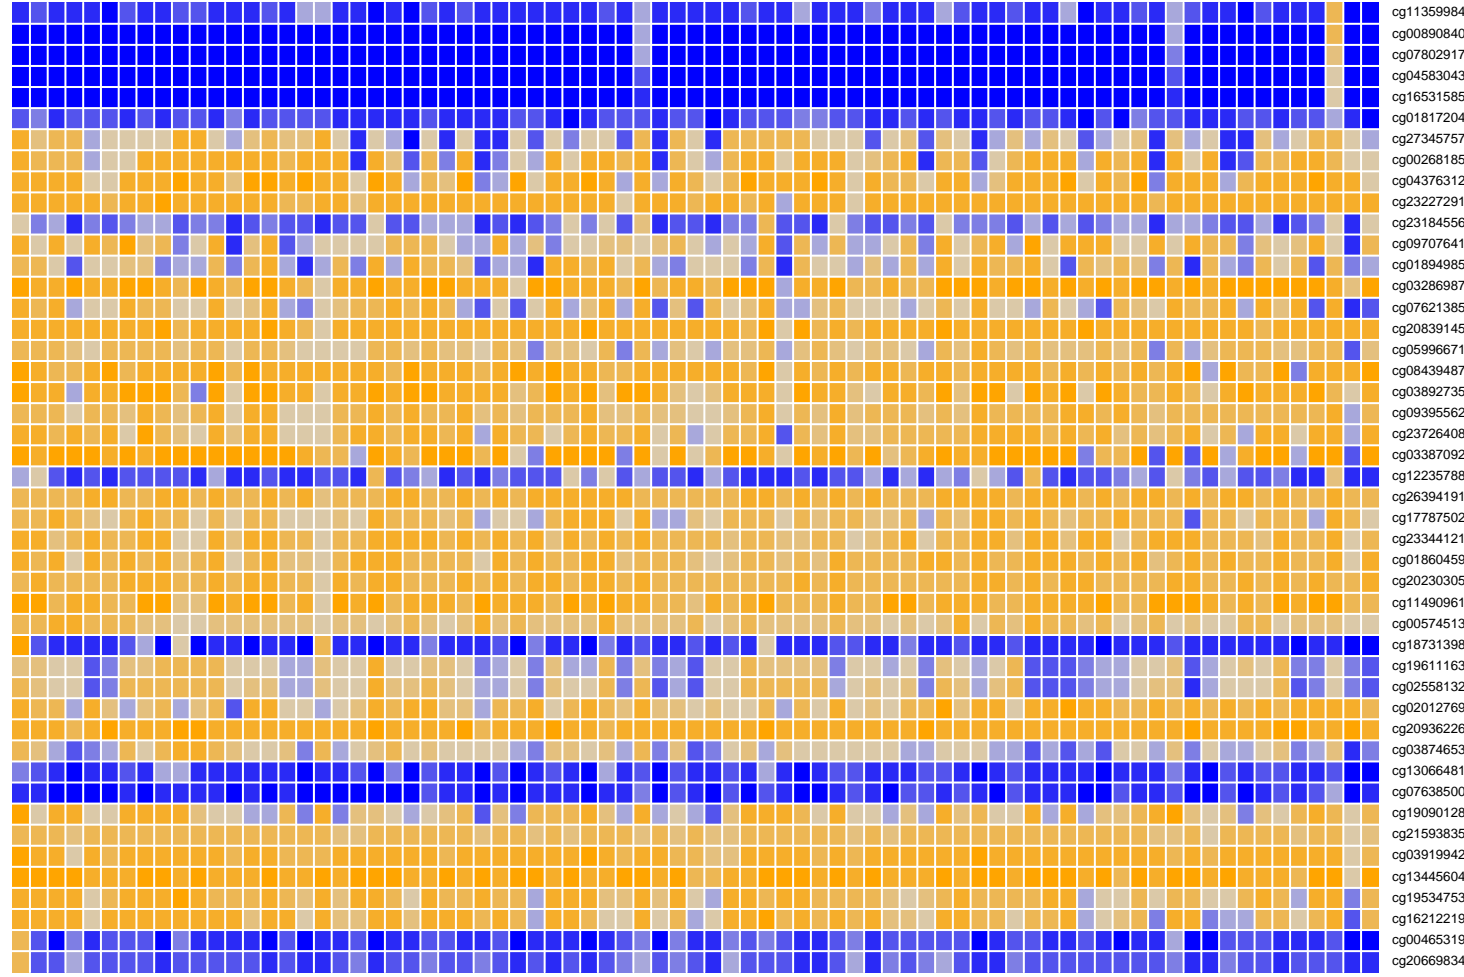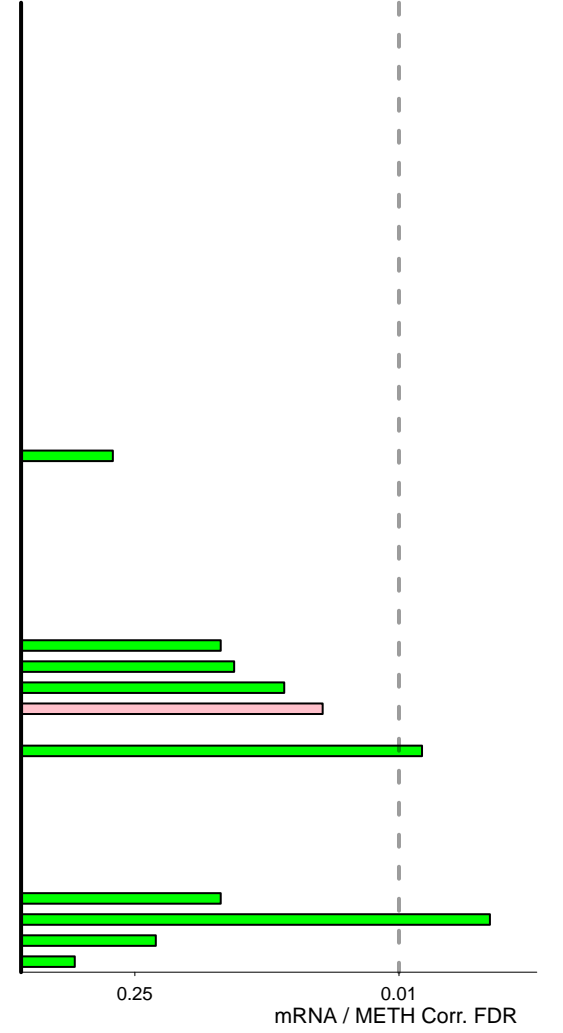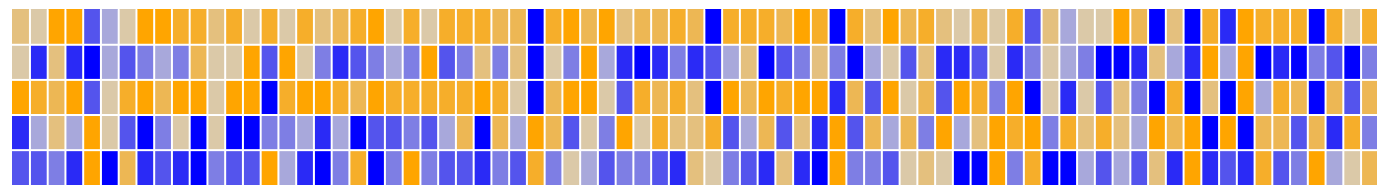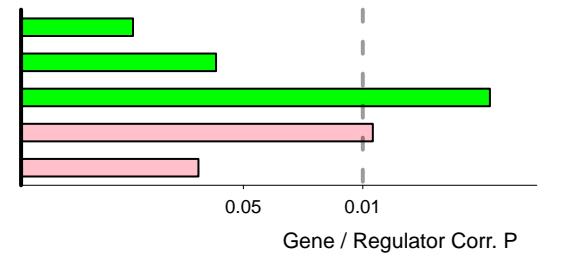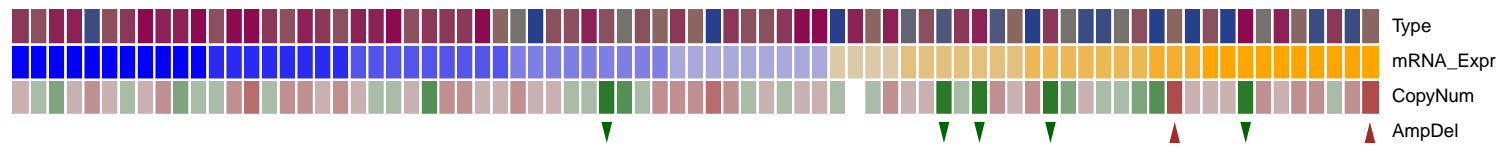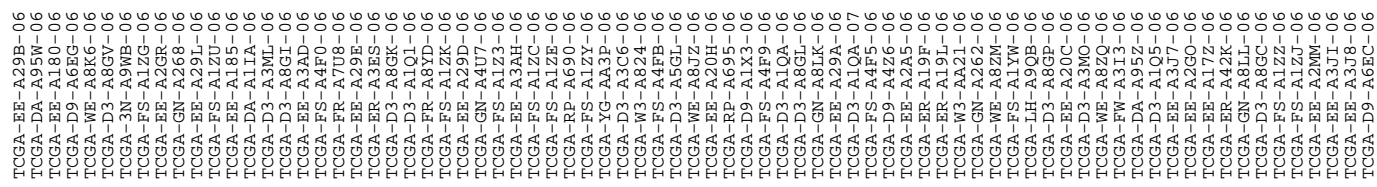

# CPA4

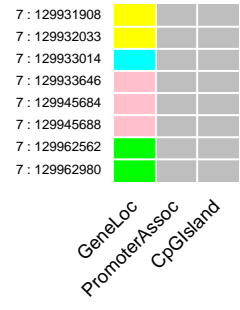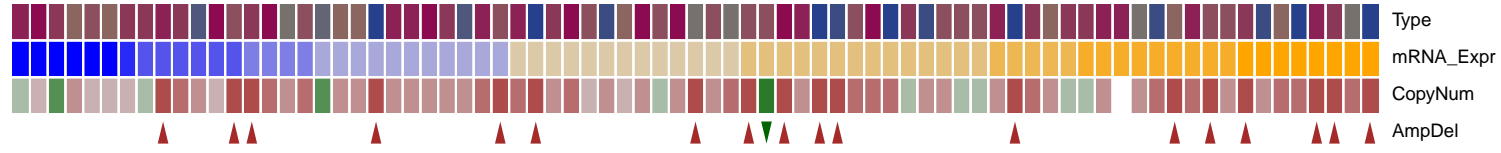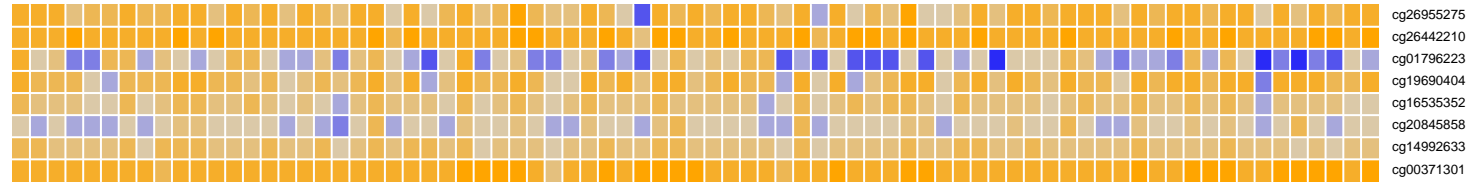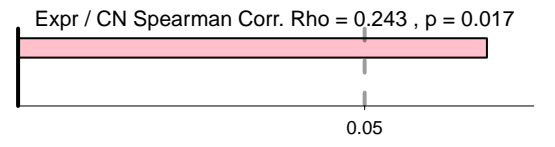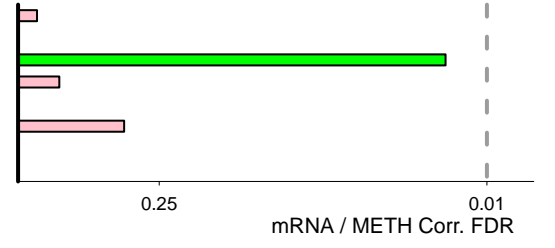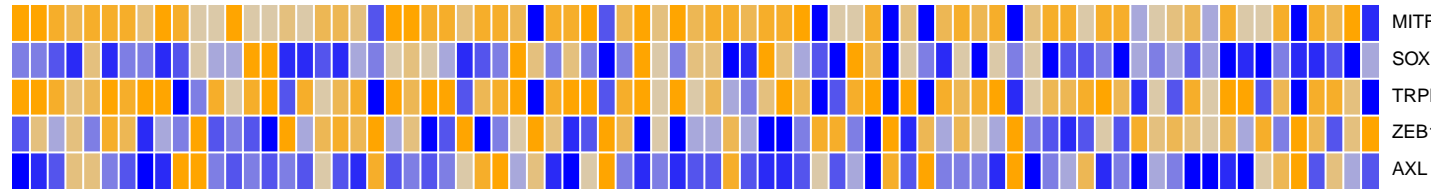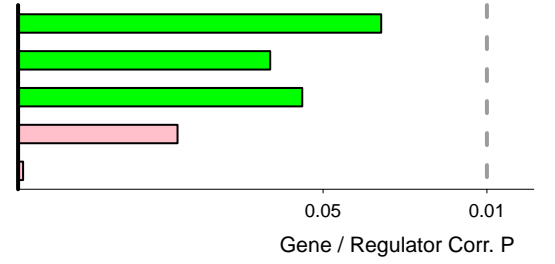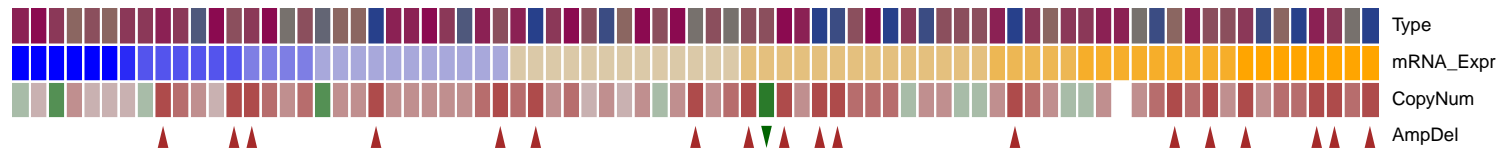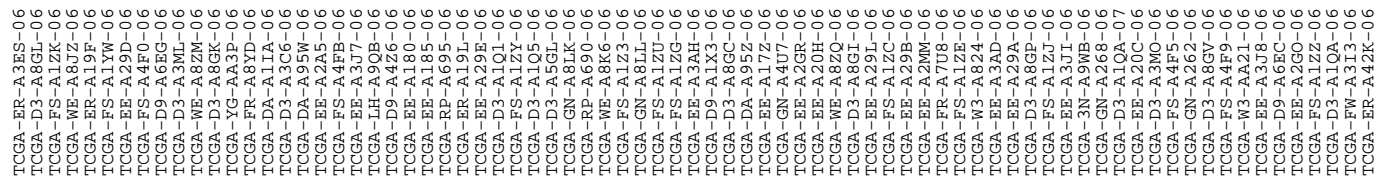

# CCDC80

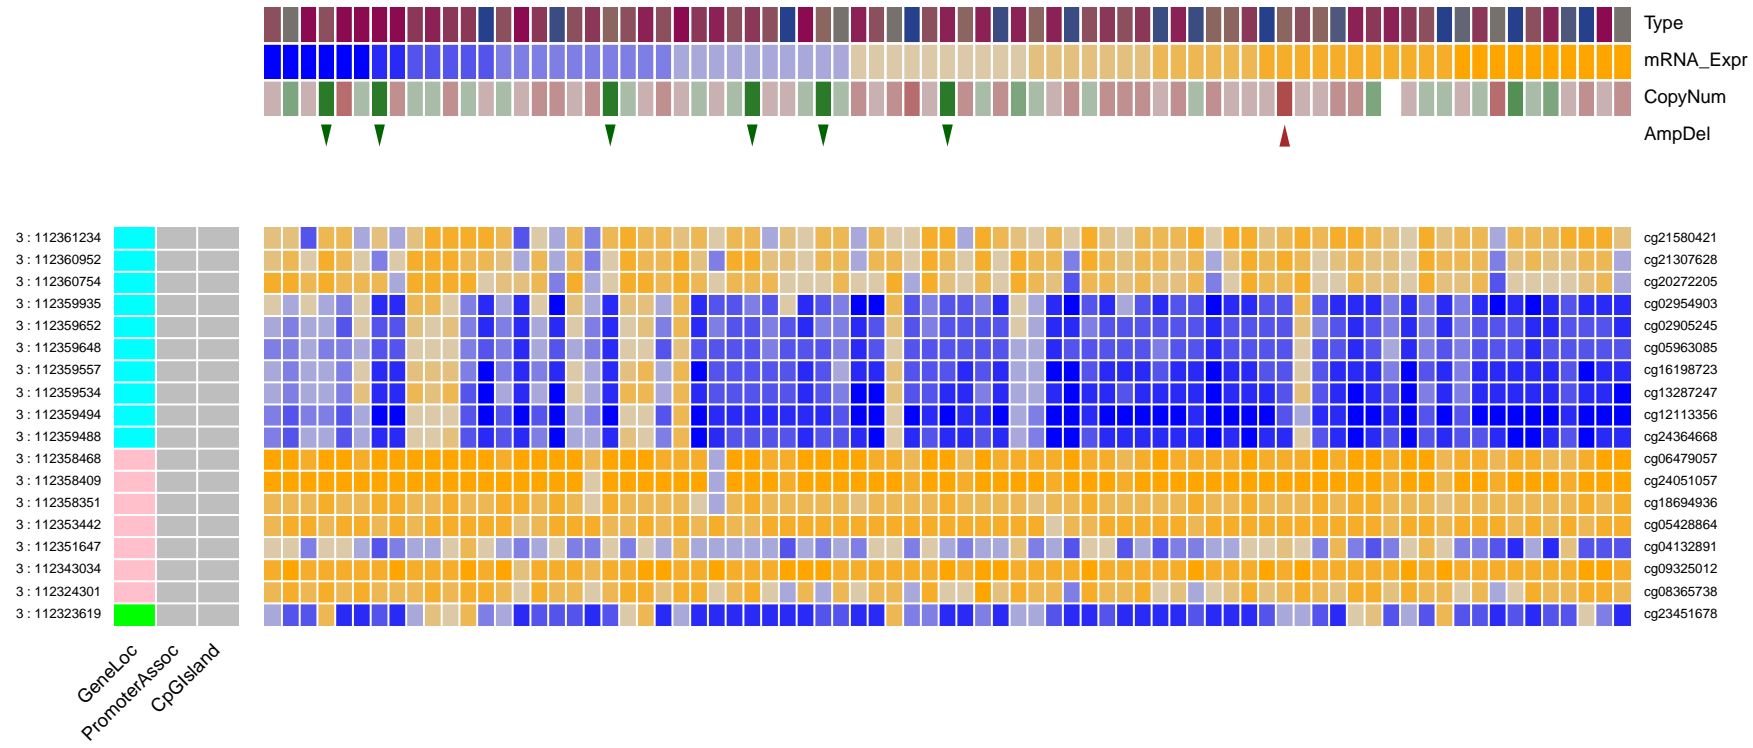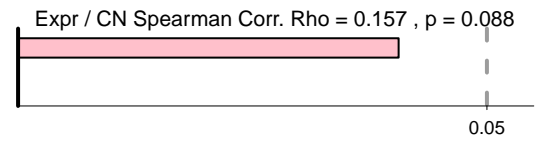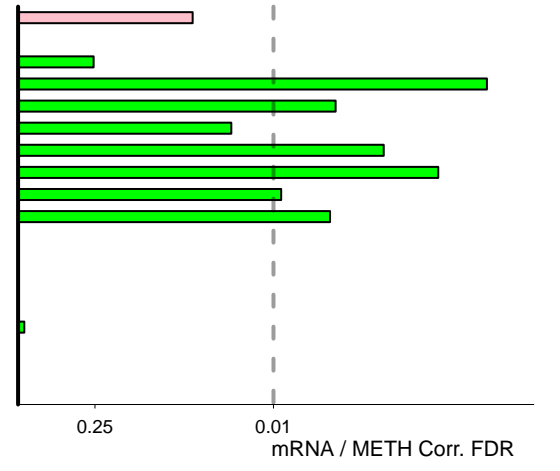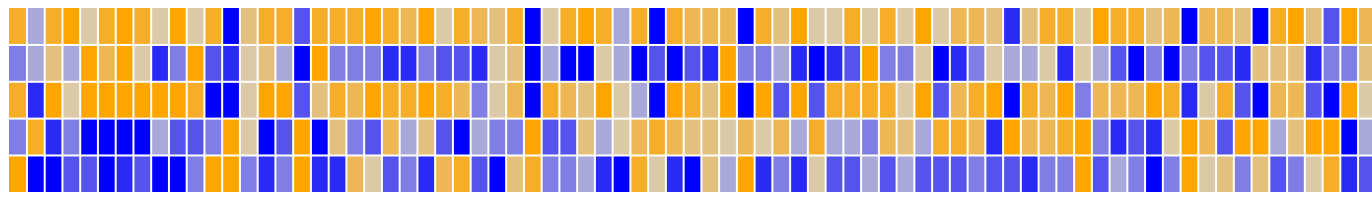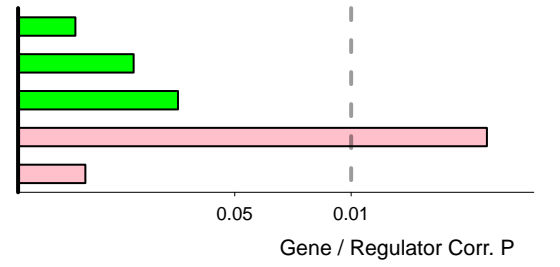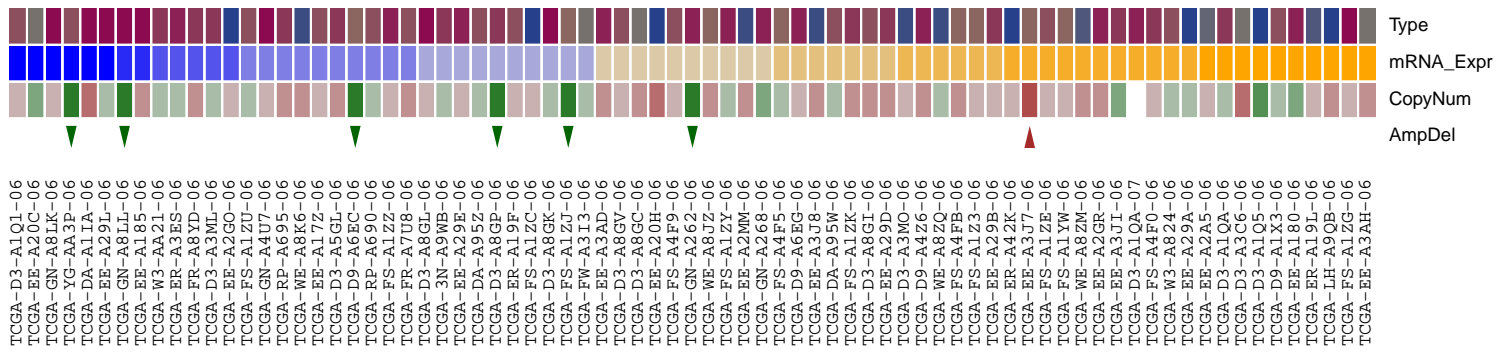

# DDX58

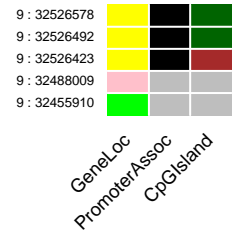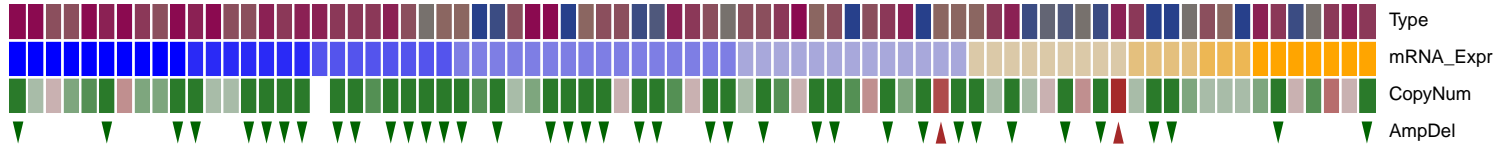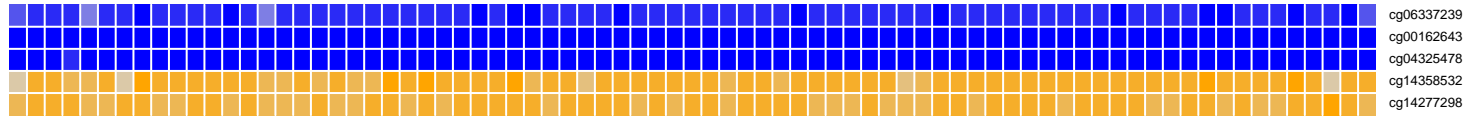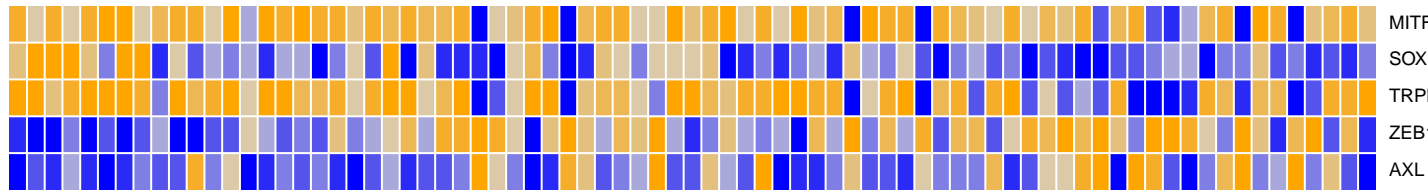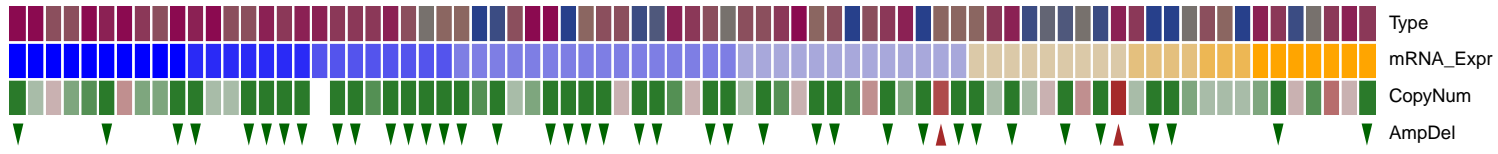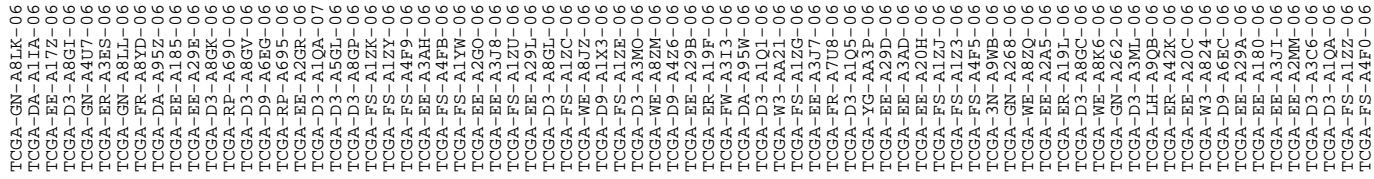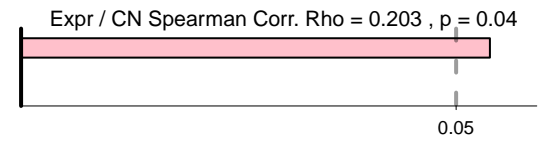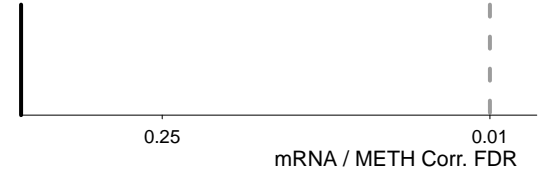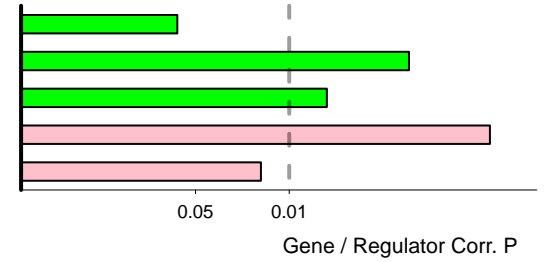

# SLC9A7

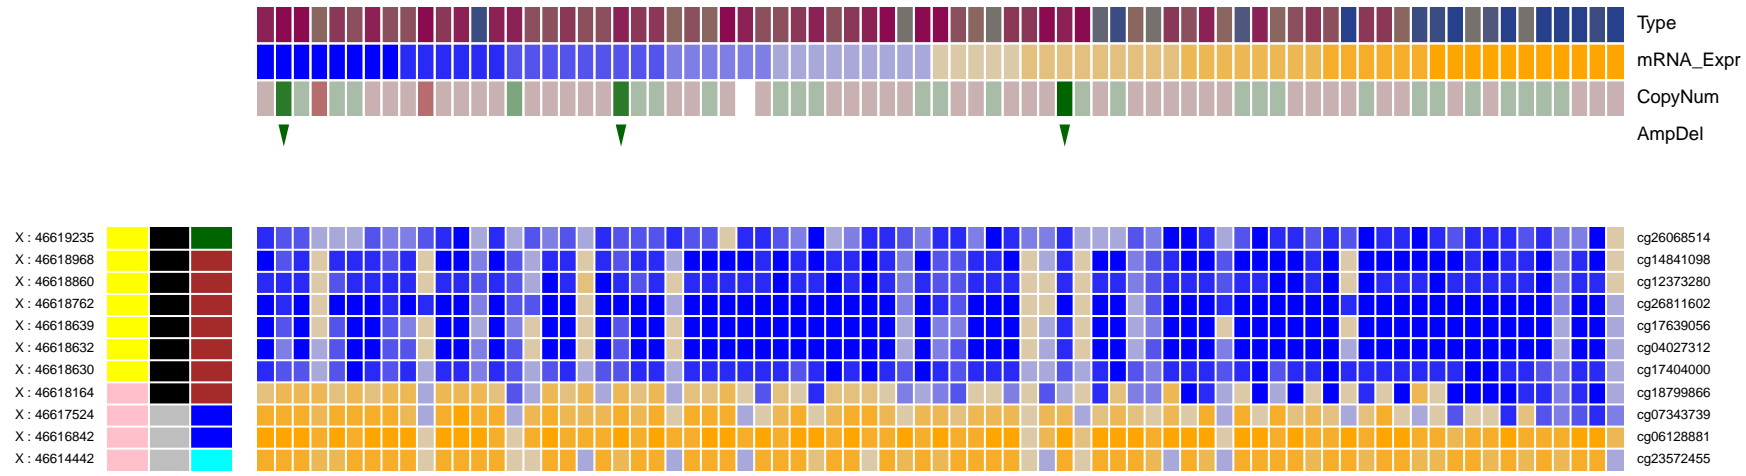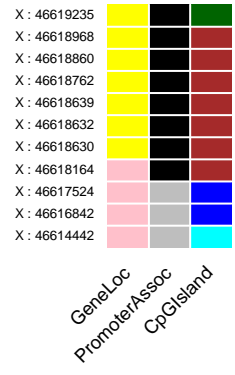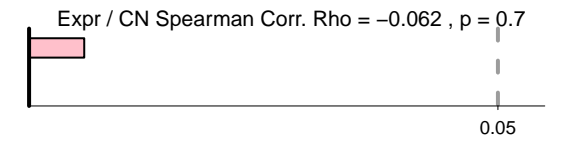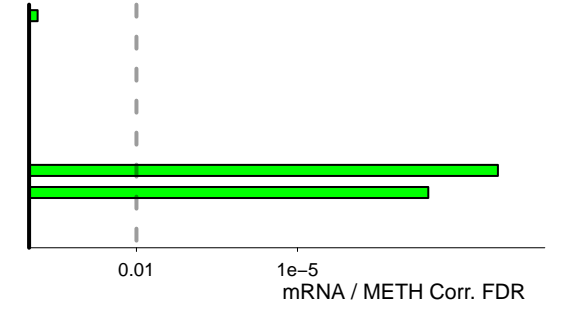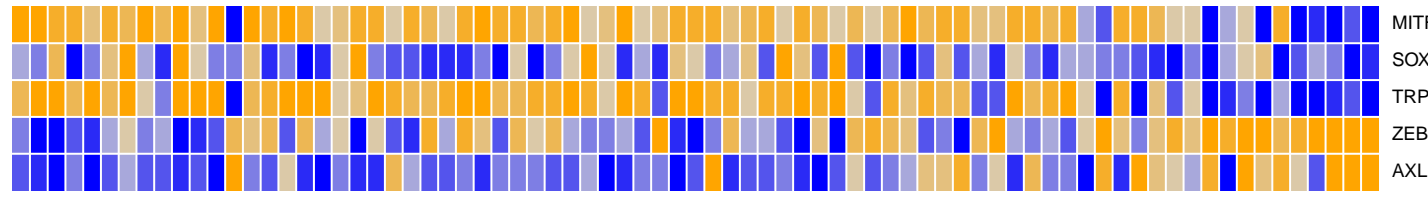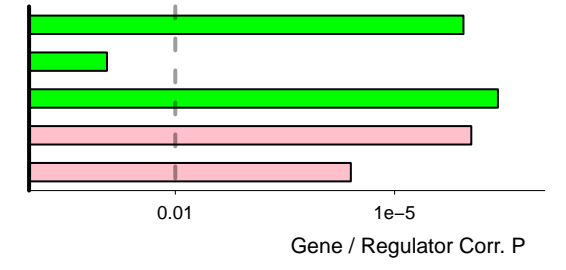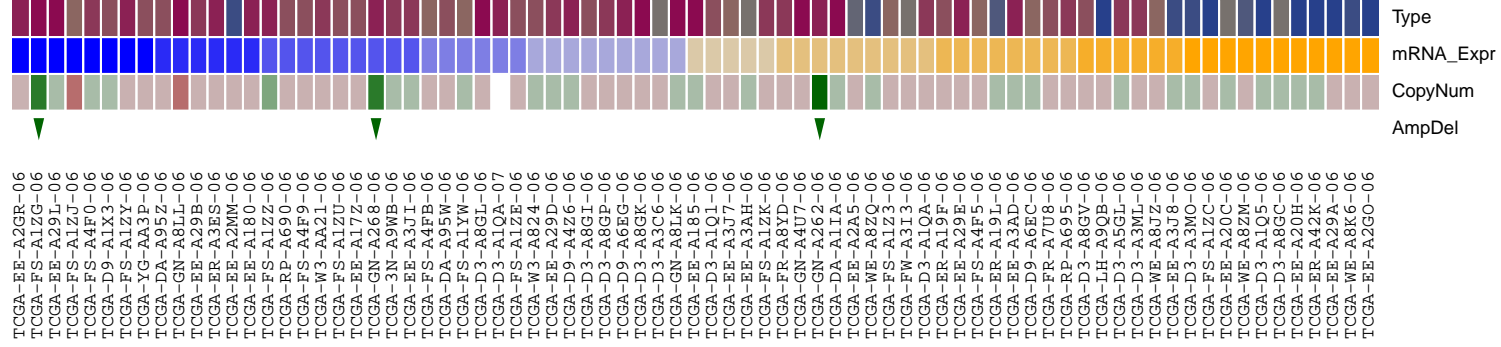

TCGA-EE-A2GR-06  
TCGA-FS-A1ZG-06  
TCGA-EE-A29L-06  
TCGA-FS-A1ZJ-06  
TCGA-FS-A4F0-06  
TCGA-D9-A1X3-06  
TCGA-FS-A1ZY-06  
TCGA-YG-AA3P-06  
TCGA-DA-A95Z-06  
TCGA-GN-A8LL-06  
TCGA-EE-A29B-06  
TCGA-ER-A3ES-06  
TCGA-EE-A2MM-06  
TCGA-EE-A180-06  
TCGA-FS-A1ZZ-06  
TCGA-BP-A690-06  
TCGA-FS-A4F9-06  
TCGA-FS-A4Z1-06  
TCGA-FS-A1ZU-06  
TCGA-EE-A1Z2-06  
TCGA-GN-A268-06  
TCGA-3N-A9WB-06  
TCGA-EE-A3JI-06  
TCGA-FS-A4FB-06  
TCGA-DA-A95W-06  
TCGA-FS-A1YW-06  
TCGA-D3-A8GL-06  
TCGA-D3-A1QA-07  
TCGA-FS-A1ZE-06  
TCGA-W3-A824-06  
TCGA-EE-A29D-06  
TCGA-D9-A4Z6-06  
TCGA-D3-A8GI-06  
TCGA-D9-A6EG-06  
TCGA-D3-A8GK-06  
TCGA-D3-A3C6-06  
TCGA-GN-A8LK-06  
TCGA-EE-A185-06  
TCGA-D3-A1O1-06  
TCGA-EE-A3AH-06  
TCGA-FS-A1ZK-06  
TCGA-FR-A8YD-06  
TCGA-GN-A4U7-06  
TCGA-GN-A262-06  
TCGA-DA-A1IA-06  
TCGA-EE-A2A5-06  
TCGA-WE-A87O-06  
TCGA-FS-A1Z3-06  
TCGA-FW-A3J3-06  
TCGA-D3-A1QA-06  
TCGA-ER-A19F-06  
TCGA-EE-A29E-06  
TCGA-FS-A4F5-06  
TCGA-ER-A19L-06  
TCGA-EE-A3AD-06  
TCGA-D9-A6EC-06  
TCGA-FR-A7U8-06  
TCGA-RP-A695-06  
TCGA-D3-A8GV-06  
TCGA-LH-A9OB-06  
TCGA-D3-A5GL-06  
TCGA-D3-A3ML-06  
TCGA-WE-A8JZ-06  
TCGA-EE-A3J8-06  
TCGA-D3-A3MO-06  
TCGA-FS-A1ZC-06  
TCGA-EE-A20C-06  
TCGA-WE-A8ZM-06  
TCGA-D3-A1Q5-06  
TCGA-EE-A8GC-06  
TCGA-EE-A20H-06  
TCGA-ER-A42K-06  
TCGA-EE-A29A-06  
TCGA-WE-A8K6-06  
TCGA-EE-A2GO-06

# ANGPT1

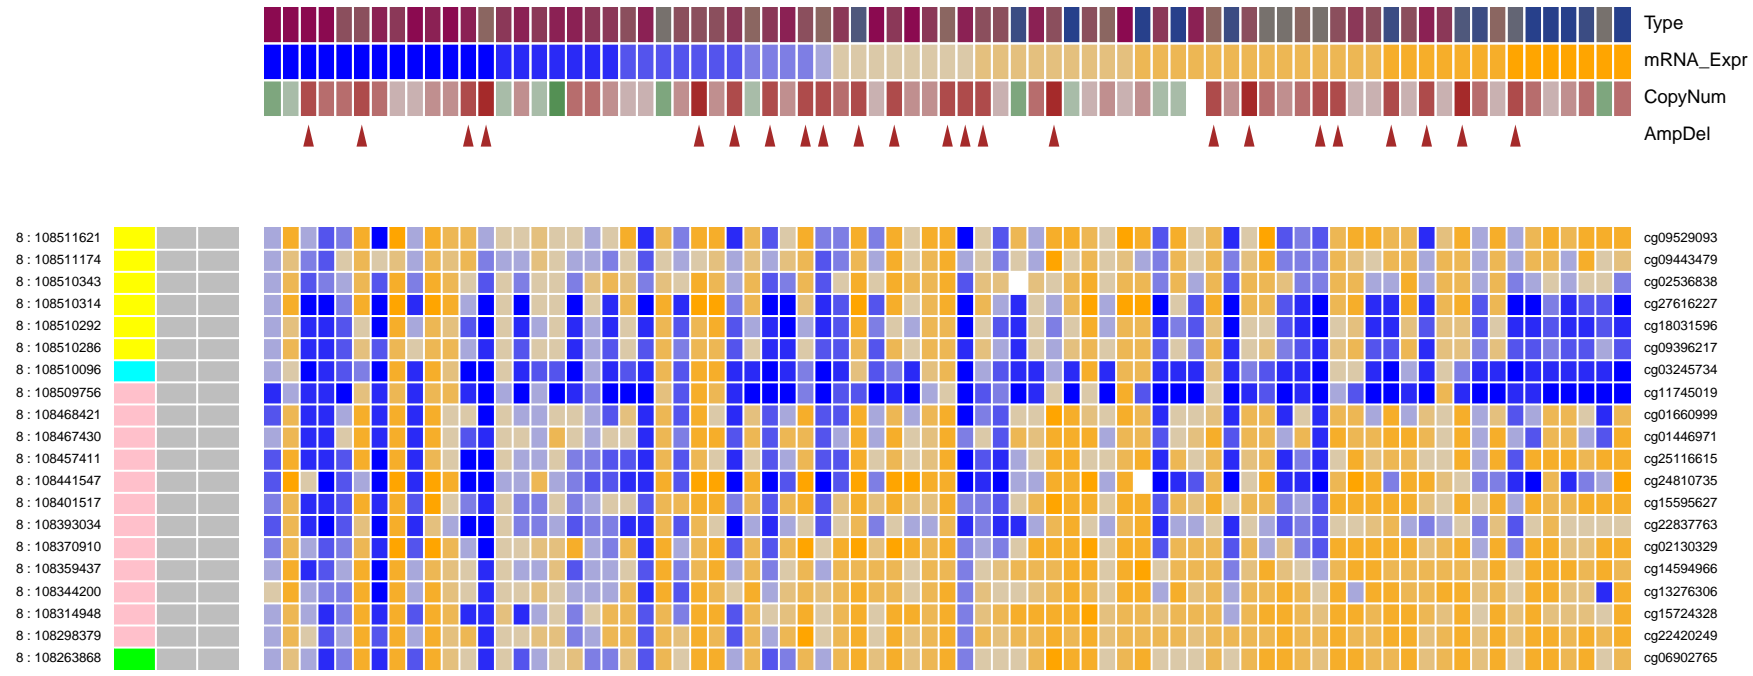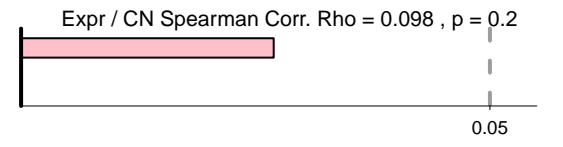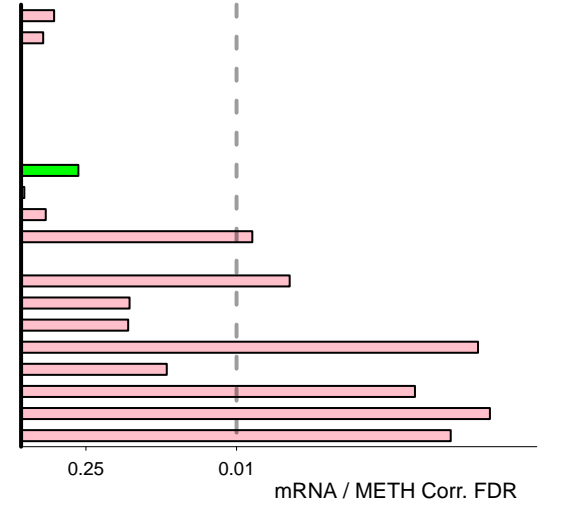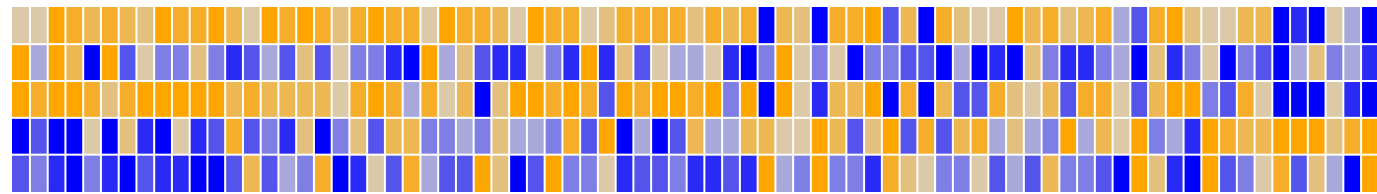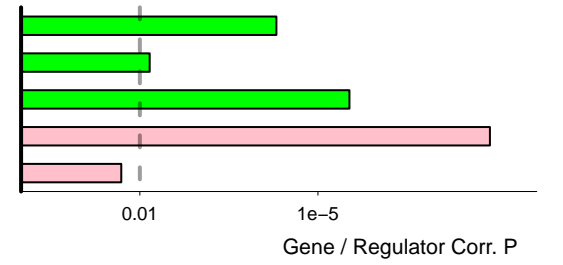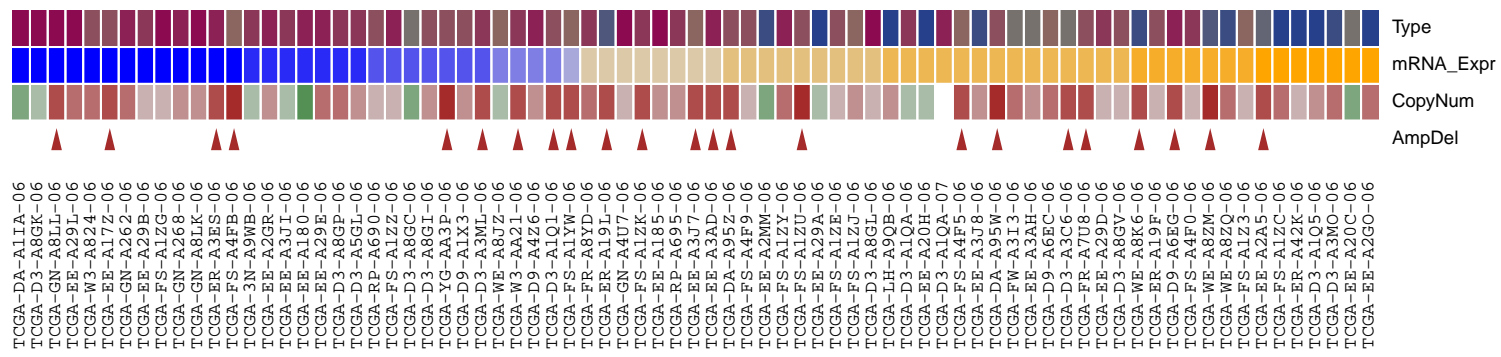

Type  
mRNA\_Expr  
CopyNum  
AmpDel

# STC2

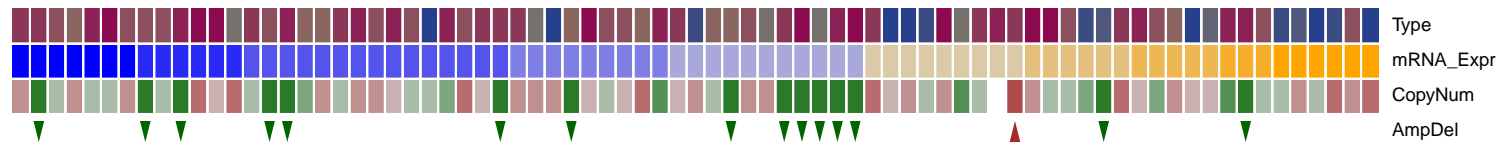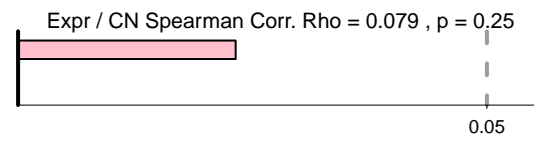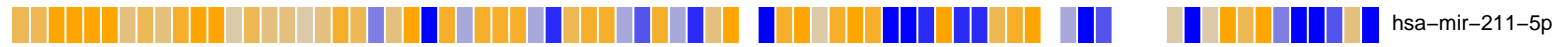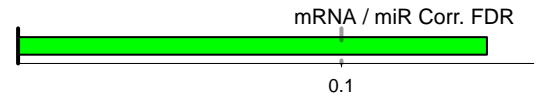

5 : 172757702  
5 : 172757276  
5 : 172757074  
5 : 172756999  
5 : 172756558  
5 : 172756550  
5 : 172756429  
5 : 172755995  
5 : 172755856  
5 : 172755421  
5 : 172755413  
5 : 172755183  
5 : 172755103  
5 : 172754896  
5 : 172754848  
5 : 172754465  
5 : 172754417  
5 : 172753741  
5 : 172753646  
5 : 172751331  
5 : 172751269  
5 : 172751061  
5 : 172750923  
5 : 172750611  
5 : 172750450  
5 : 172748917  
5 : 172744941  
5 : 172744882  
5 : 172744704  
5 : 172744670  
5 : 172744616  
5 : 172743837

GeneLoc  
PromoterAssoc  
CpGIsland

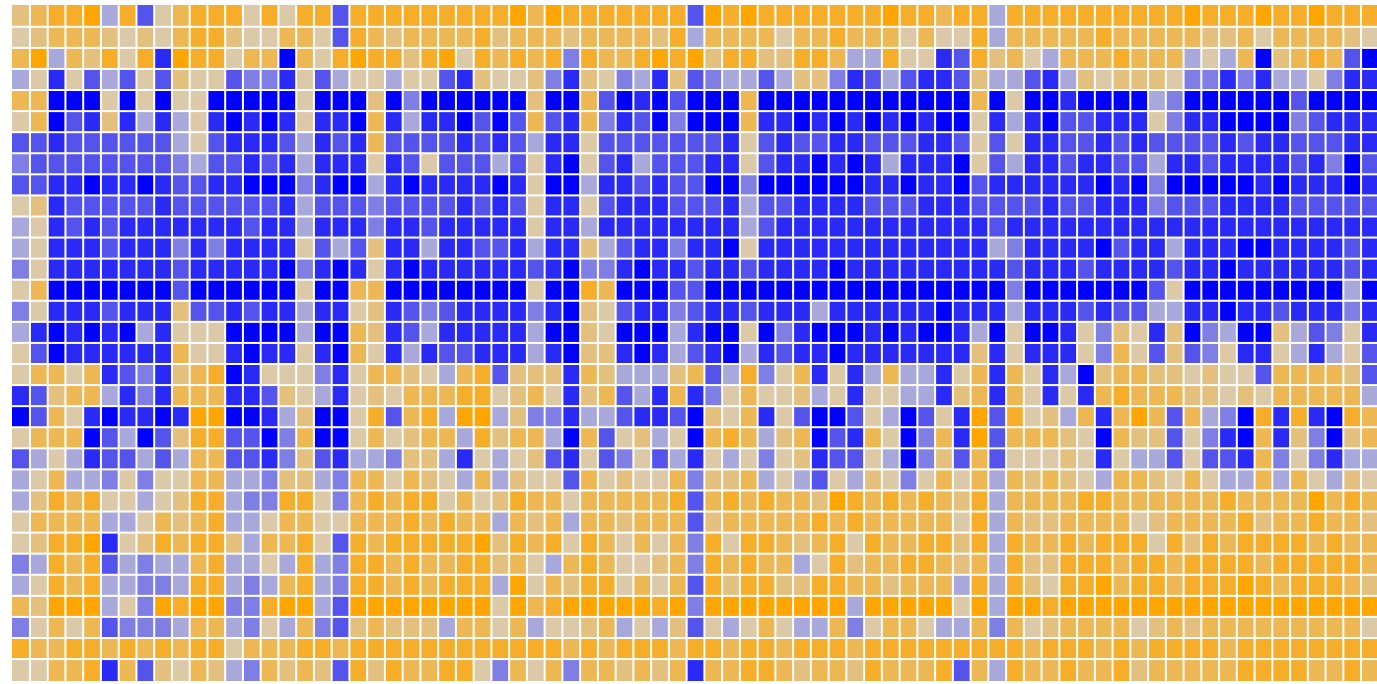

cg27123016  
cg19728382  
cg26721877  
cg19586881  
cg16443866  
cg08711858  
cg16600829  
cg22834998  
cg18281743  
cg19673350  
cg18335607  
cg02135395  
cg11457817  
cg18680788  
cg06439005  
cg02138264  
cg19773855  
cg01010188  
cg25592413  
cg01984743  
cg26605683  
cg15420720  
cg19481287  
cg13329346  
cg10625081  
cg20977312  
cg23428905  
cg19878194  
cg03983713  
cg08839053  
cg24018799  
cg03846076

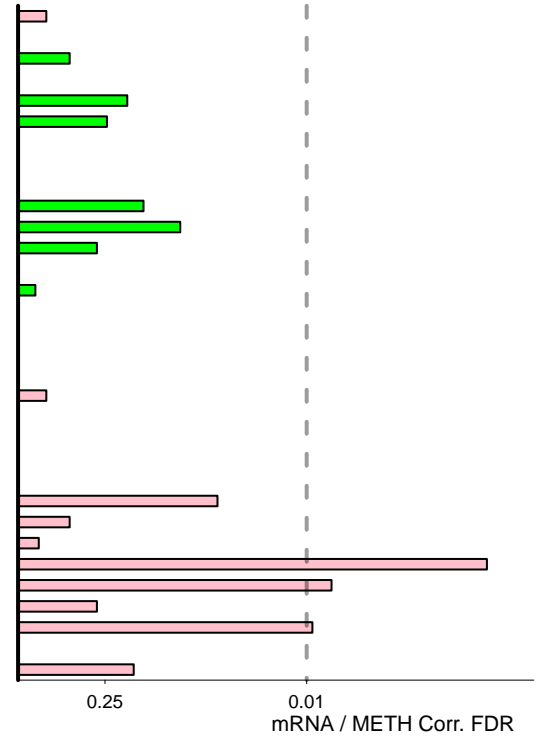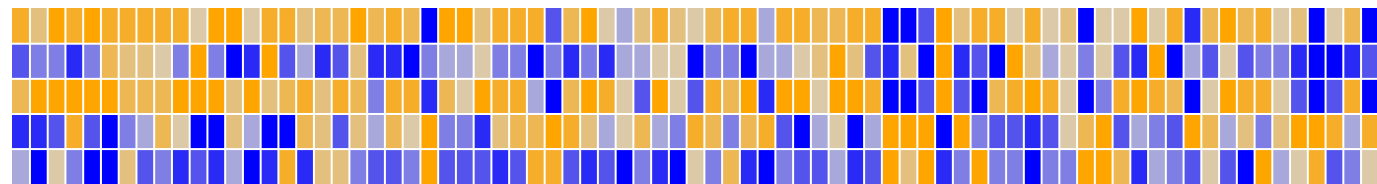

MITF  
SOX10  
TRPM1  
ZEB1  
AXL

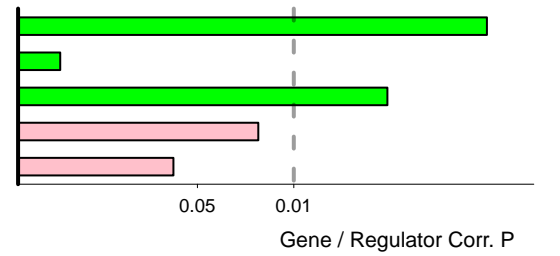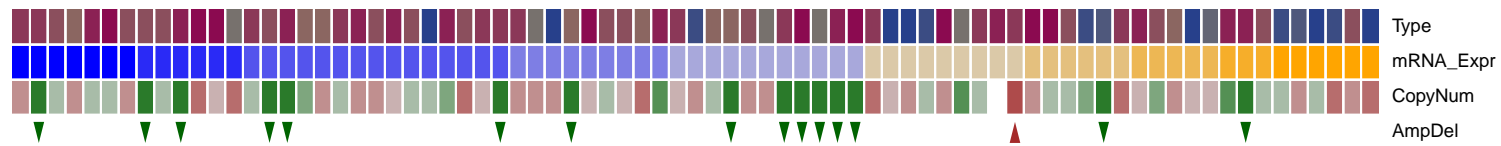

TCGA-EE-A3JI-06  
TCGA-FS-A4FO-06  
TCGA-RP-A690-06  
TCGA-FS-A1YW-06  
TCGA-ER-A3ES-06  
TCGA-EE-A29L-06  
TCGA-ER-A19F-06  
TCGA-D9-A1X3-06  
TCGA-FS-A1ZE-06  
TCGA-GN-A268-06  
TCGA-DA-A1JA-06  
TCGA-FS-A1ZG-06  
TCGA-W3-AA21-06  
TCGA-EE-A17Z-06  
TCGA-EE-A29F-06  
TCGA-EE-A3J7-06  
TCGA-WE-A8U7-06  
TCGA-D3-A1QA-06  
TCGA-EE-A180-06  
TCGA-DA-A95Z-06  
TCGA-FS-A1ZZ-06  
TCGA-W3-A824-06  
TCGA-EE-A29A-06  
TCGA-YG-AA3P-06  
TCGA-EE-A29B-06  
TCGA-D3-A5GL-06  
TCGA-EE-A29D-06  
TCGA-D3-A8GC-06  
TCGA-LH-A9QB-06  
TCGA-FS-A4FB-06  
TCGA-D3-A8GL-06  
TCGA-DA-A95W-06  
TCGA-D3-A8GV-06  
TCGA-FS-A4F5-06  
TCGA-EE-A3AD-06  
TCGA-D3-A8GF-06  
TCGA-EE-A3J8-06  
TCGA-FS-A1Z3-06  
TCGA-D9-A6EC-06  
TCGA-FS-A4F9-06  
TCGA-EE-A20C-06  
TCGA-RP-A695-06  
TCGA-EE-A185-06  
TCGA-EE-A3AH-06  
TCGA-FS-A1ZY-06  
TCGA-GN-A4U7-06  
TCGA-FS-A1ZK-06  
TCGA-EE-A2G0-06  
TCGA-D3-A1Q9-06  
TCGA-WE-A8KG-06  
TCGA-GN-A8LL-06  
TCGA-D3-A3C6-06  
TCGA-D3-A3ML-06  
TCGA-D3-A1QA-07  
TCGA-FR-A8YD-06  
TCGA-GN-A8LK-06  
TCGA-D3-A8GK-06  
TCGA-FS-A1ZU-06  
TCGA-EE-A2MM-06  
TCGA-WE-A8ZN-06  
TCGA-3N-A9WB-06  
TCGA-D9-A6EG-06  
TCGA-D3-A8GI-06  
TCGA-FS-A1ZJ-06  
TCGA-ER-A42K-06  
TCGA-EE-A2A5-06  
TCGA-D9-A4Z6-06  
TCGA-GN-A262-06  
TCGA-D3-A1Q1-06  
TCGA-D3-A3MO-06  
TCGA-ER-A19L-06  
TCGA-FS-A1ZC-06  
TCGA-WE-A8ZO-06  
TCGA-FR-A7U8-06  
TCGA-EE-A20H-06

Type  
mRNA\_Expr  
CopyNum  
AmpDel

# PODXL

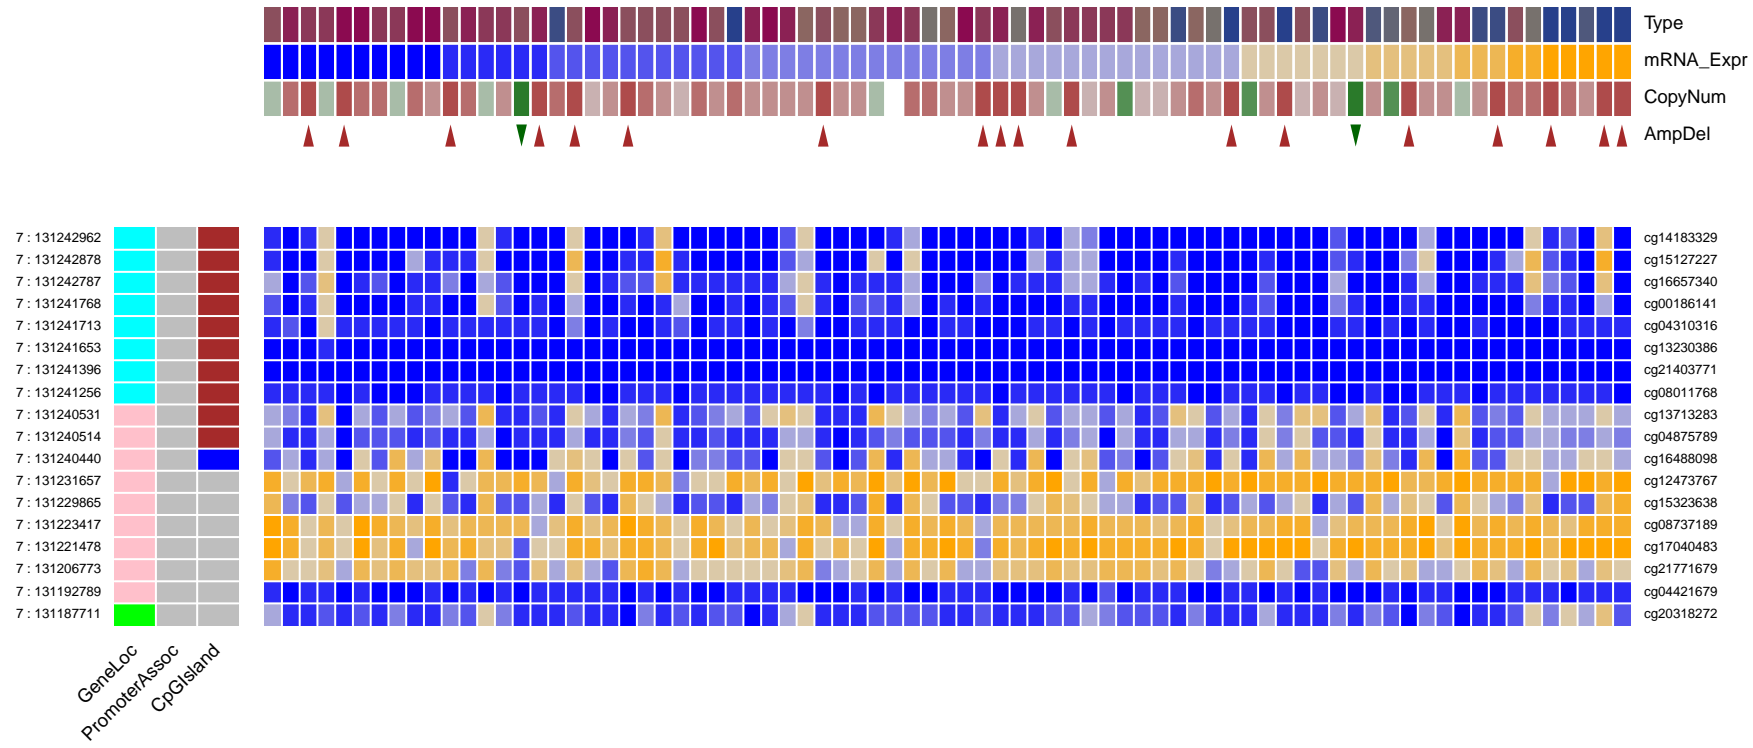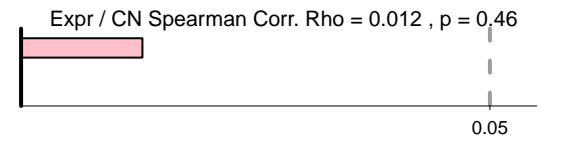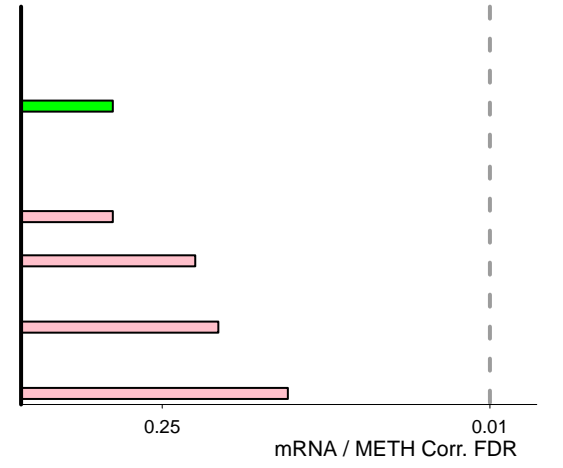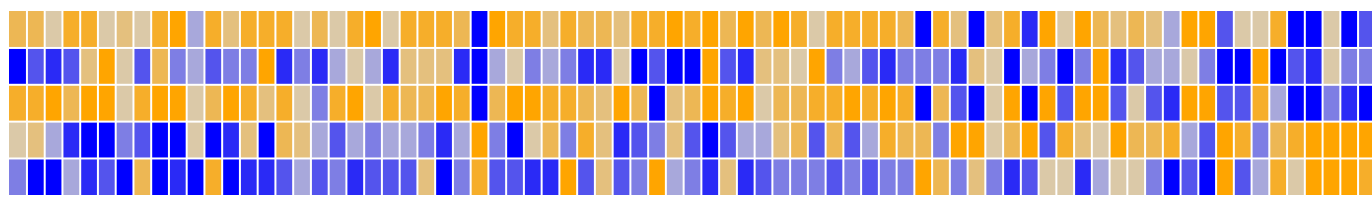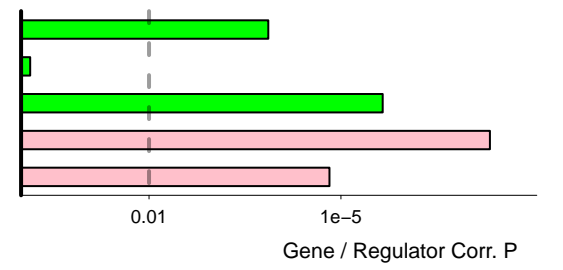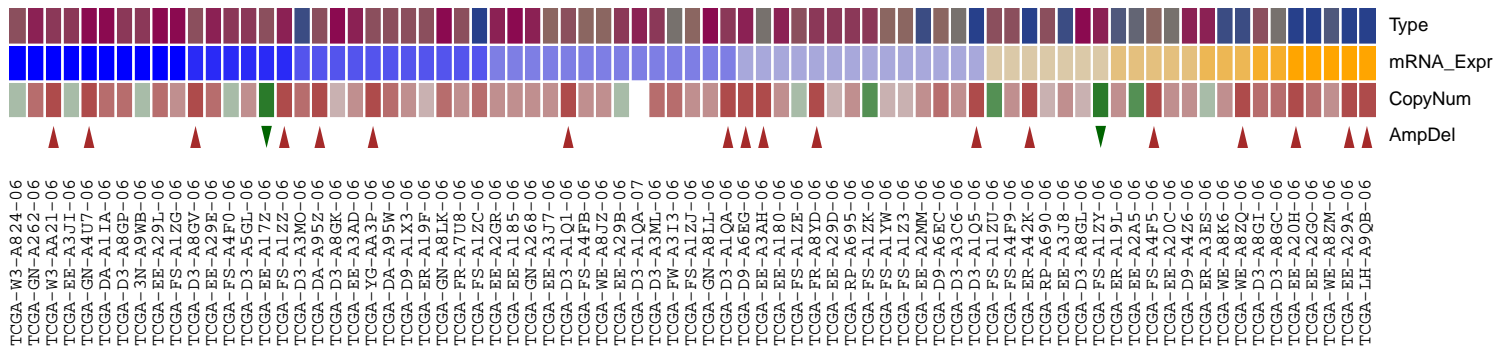



# ARNTL2

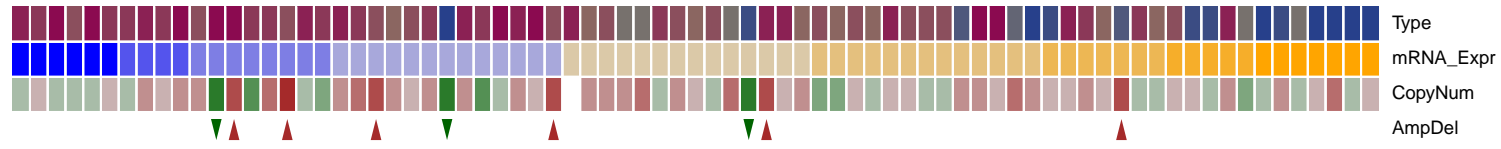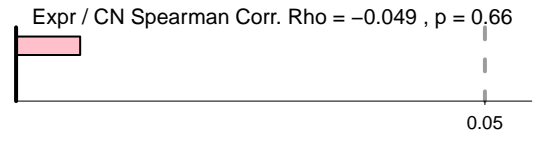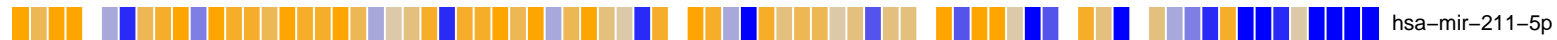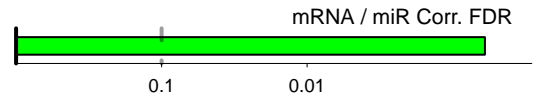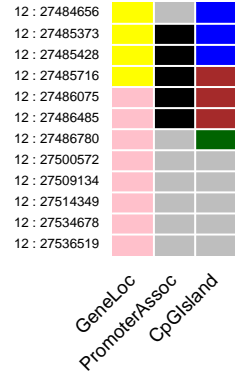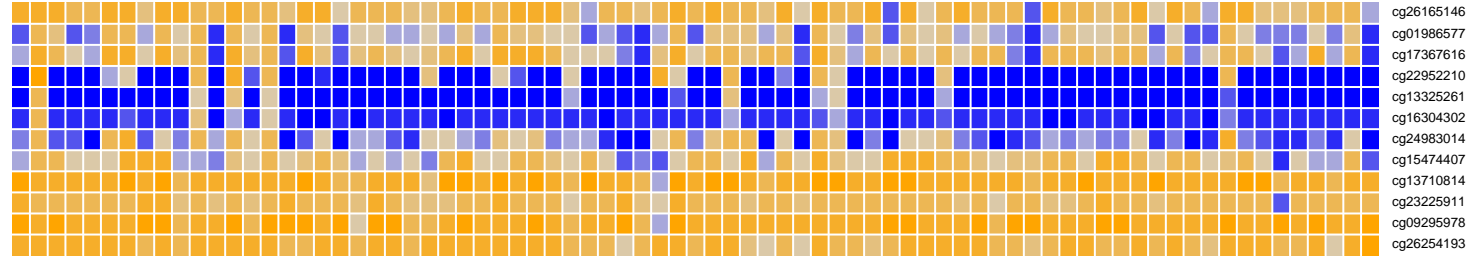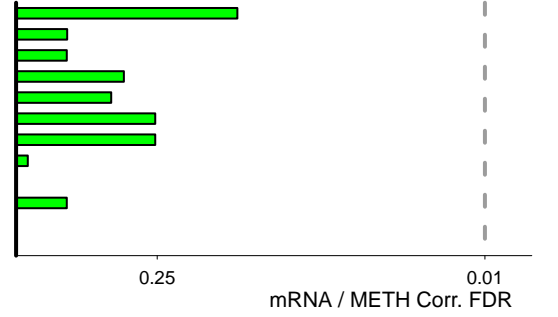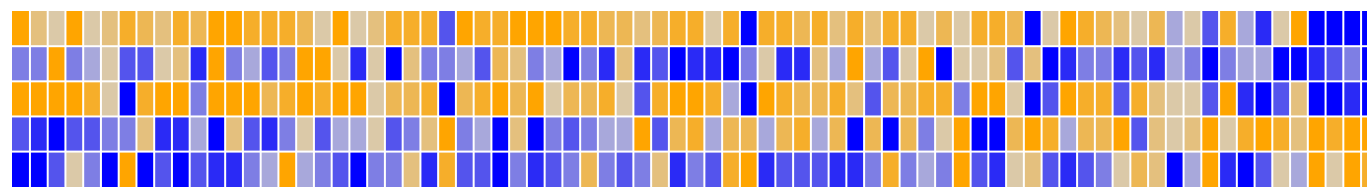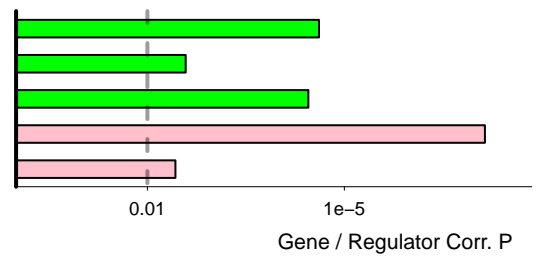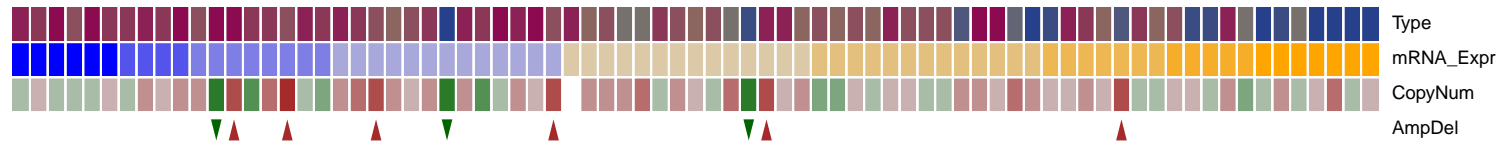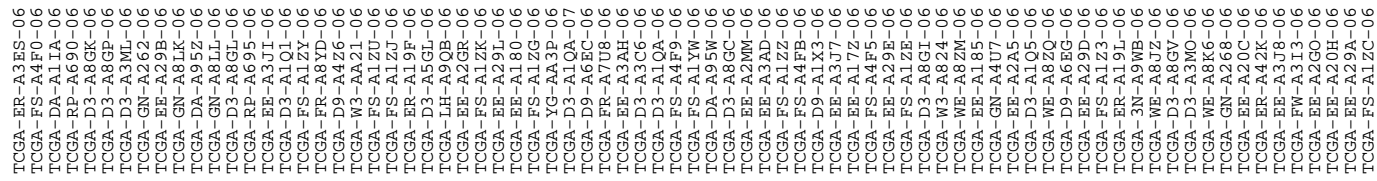

# GPR176

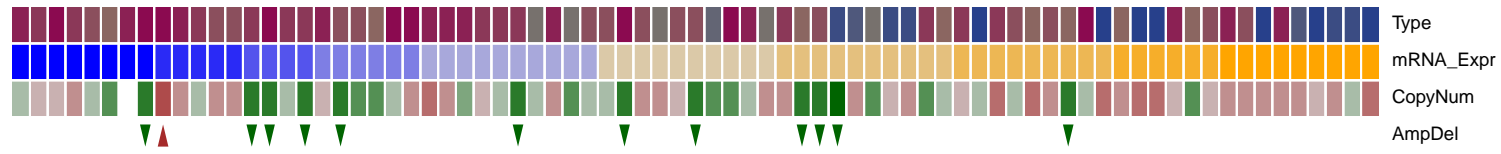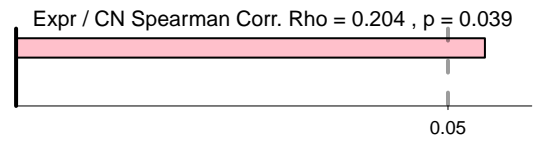

15 : 40214068  
 15 : 40213409  
 15 : 40213339  
 15 : 40213326  
 15 : 40213314  
 15 : 40213280  
 15 : 40213270  
 15 : 40212781  
 15 : 40212502  
 15 : 40212188  
 15 : 40212176  
 15 : 40212106  
 15 : 40211272  
 15 : 40179641  
 15 : 40161645  
 15 : 40152928  
 15 : 40143956  
 15 : 40136969  
 15 : 40129363  
 15 : 40122259  
 15 : 40120808  
 15 : 40113167  
 15 : 40100961  
 15 : 40098188  
 15 : 40093305

GeneLoc  
 PromoterAssoc  
 CpGIsland

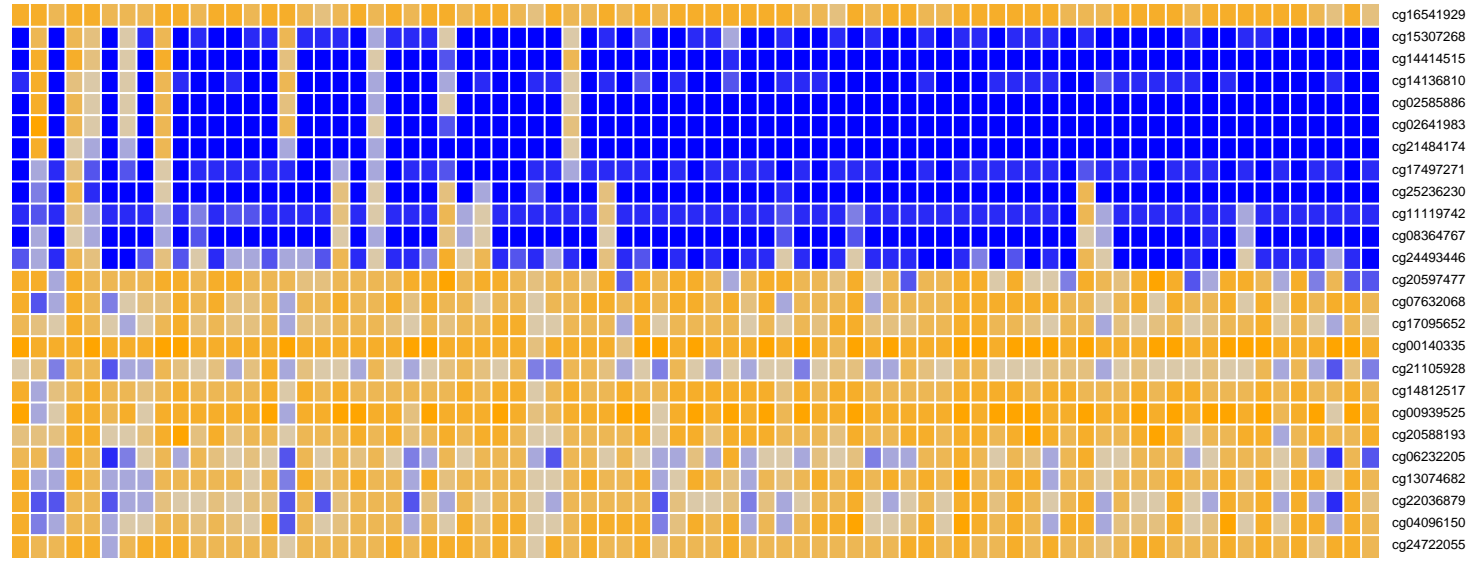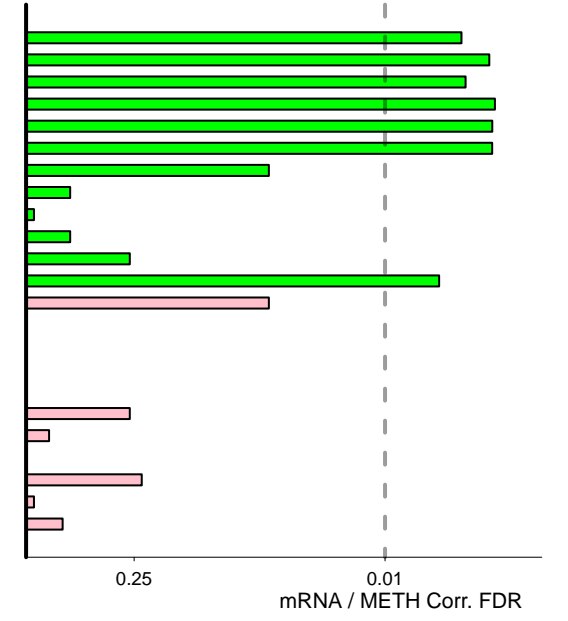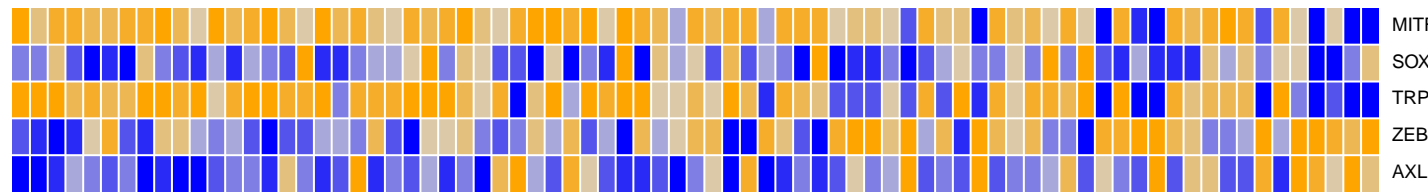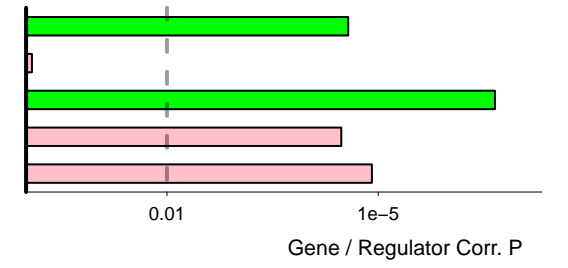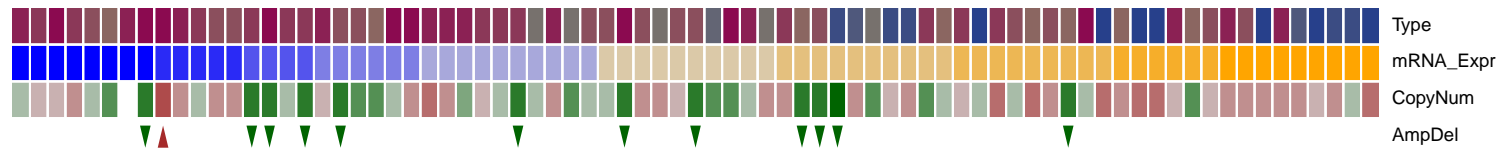

TCGA-ER-A3ES-06  
 TCGA-FS-A4F0-06  
 TCGA-GN-A4U7-06  
 TCGA-EE-A3JI-06  
 TCGA-W3-A824-06  
 TCGA-FS-A4FB-06  
 TCGA-D3-A1QA-07  
 TCGA-GN-A8LK-06  
 TCGA-D3-A8CH-06  
 TCGA-W3-AA21-06  
 TCGA-VG-AA3P-06  
 TCGA-FP-A7U8-06  
 TCGA-EP-A695-06  
 TCGA-FS-A1ZG-06  
 TCGA-D3-A1QA-06  
 TCGA-EP-A8VC-06  
 TCGA-D9-A6EG-06  
 TCGA-DA-A95Z-06  
 TCGA-D3-A1Q1-06  
 TCGA-EE-A3J7-06  
 TCGA-D3-A6GK-06  
 TCGA-EE-A185-06  
 TCGA-FS-A1ZY-06  
 TCGA-GN-A268-06  
 TCGA-EE-A180-06  
 TCGA-D3-A8GP-06  
 TCGA-3N-A9WB-06  
 TCGA-D3-A3ML-06  
 TCGA-FW-A313-06  
 TCGA-D9-A4Z6-06  
 TCGA-D3-A8GC-06  
 TCGA-EP-A690-06  
 TCGA-DA-A95W-06  
 TCGA-GN-A8LL-06  
 TCGA-FS-A4F9-06  
 TCGA-EE-A3AH-06  
 TCGA-D3-A8GV-06  
 TCGA-FS-A1ZE-06  
 TCGA-EE-A2A5-06  
 TCGA-EE-A291-06  
 TCGA-EE-A29E-06  
 TCGA-EE-A20C-06  
 TCGA-D3-A5GL-06  
 TCGA-FS-A1ZJ-06  
 TCGA-EE-A17Z-06  
 TCGA-WE-A8Z0-06  
 TCGA-EP-A19L-06  
 TCGA-D3-A3C6-06  
 TCGA-D3-A3M0-06  
 TCGA-WE-A8K6-06  
 TCGA-FS-A1ZK-06  
 TCGA-FS-A4F5-06  
 TCGA-EE-A29B-06  
 TCGA-EE-A29A-06  
 TCGA-EE-A29D-06  
 TCGA-FS-A1Z3-06  
 TCGA-D3-A8GI-06  
 TCGA-D9-A6EC-06  
 TCGA-DA-A1IA-06  
 TCGA-EE-A20H-06  
 TCGA-FS-A1YW-06  
 TCGA-ER-A42K-06  
 TCGA-EE-A2GO-06  
 TCGA-FS-A1ZZ-06  
 TCGA-WE-A8JZ-06  
 TCGA-ER-A19F-06  
 TCGA-EE-A2GR-06  
 TCGA-D9-A1X3-06  
 TCGA-LH-A9QB-06  
 TCGA-EE-A3AD-06  
 TCGA-WE-A8ZM-06  
 TCGA-FS-A1ZC-06  
 TCGA-EE-A378-06  
 TCGA-EE-A2MM-06  
 TCGA-D3-A1Q5-06

# FLNC

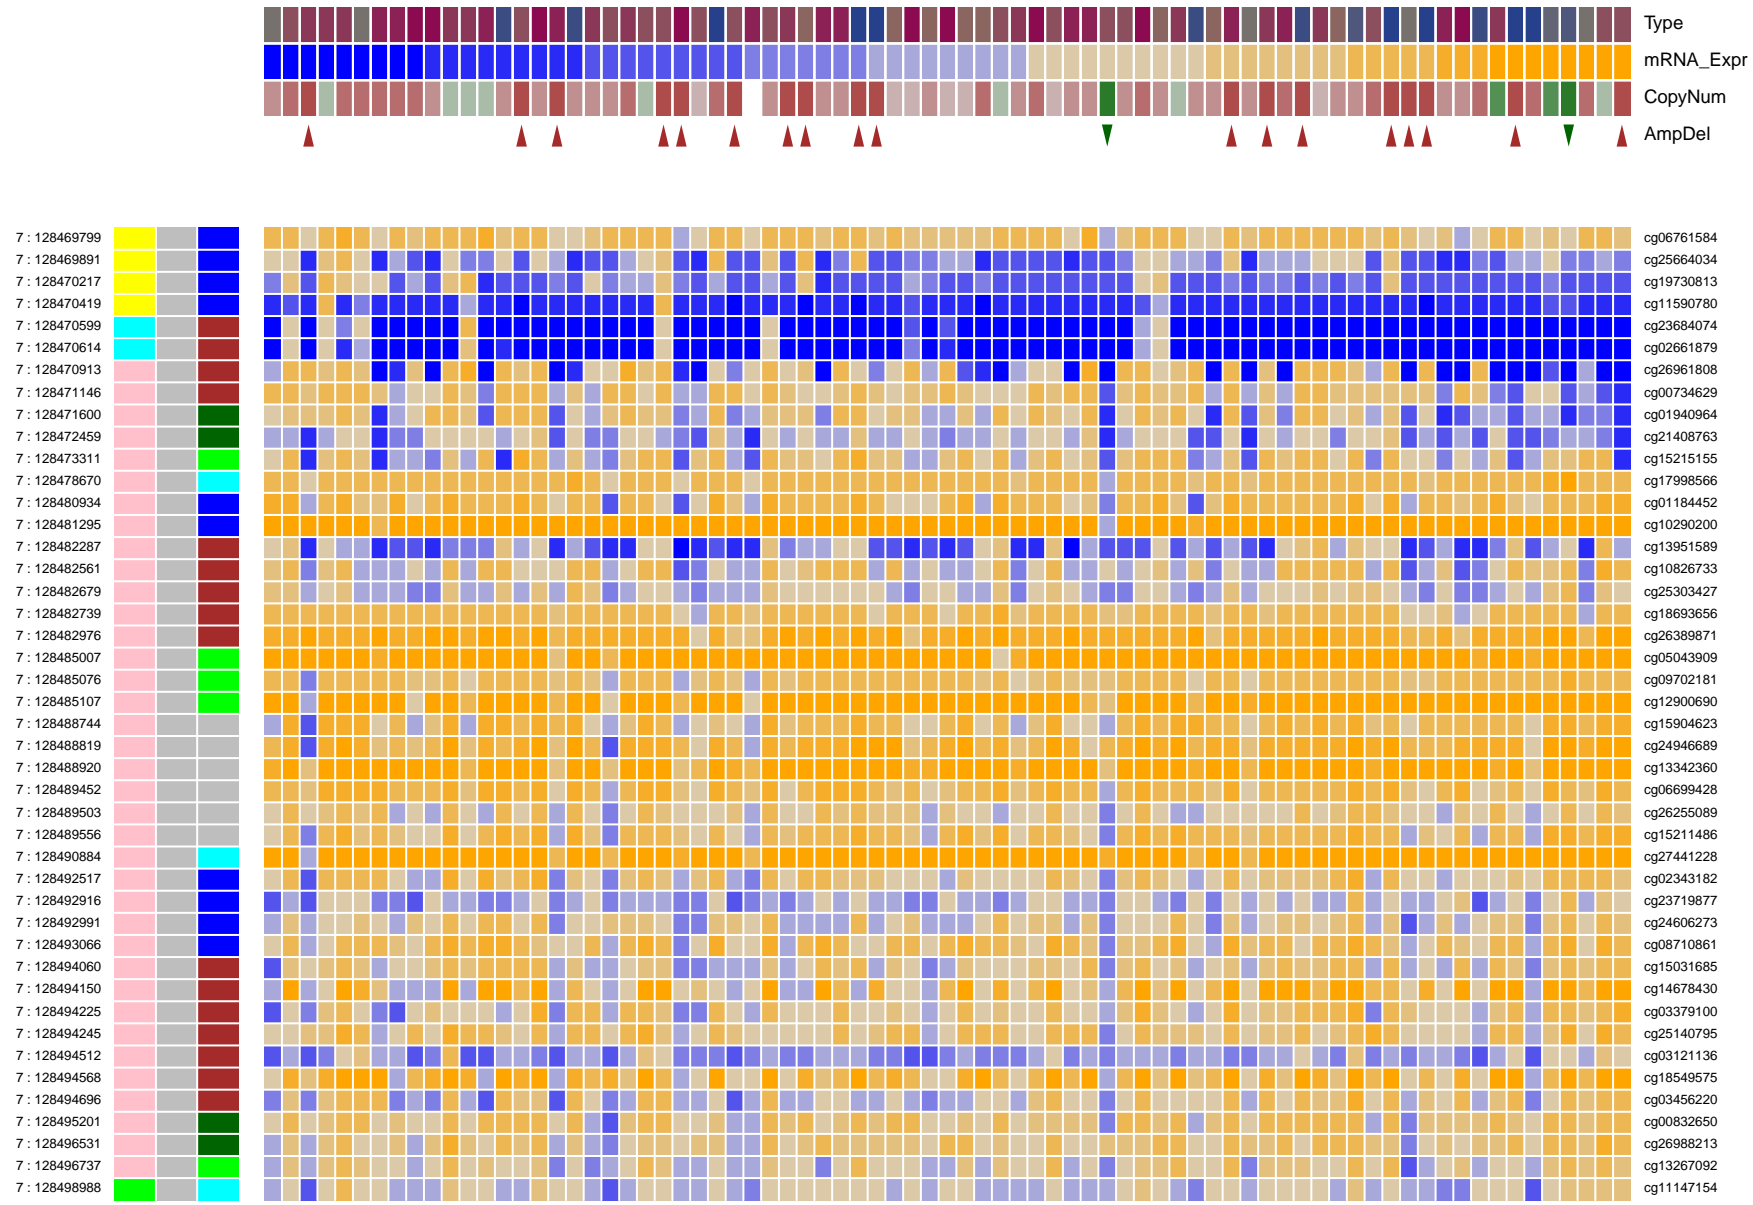

GeneLoc  
PromoterAssoc  
CpGIsland

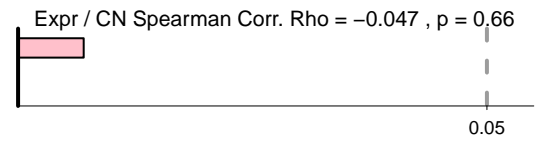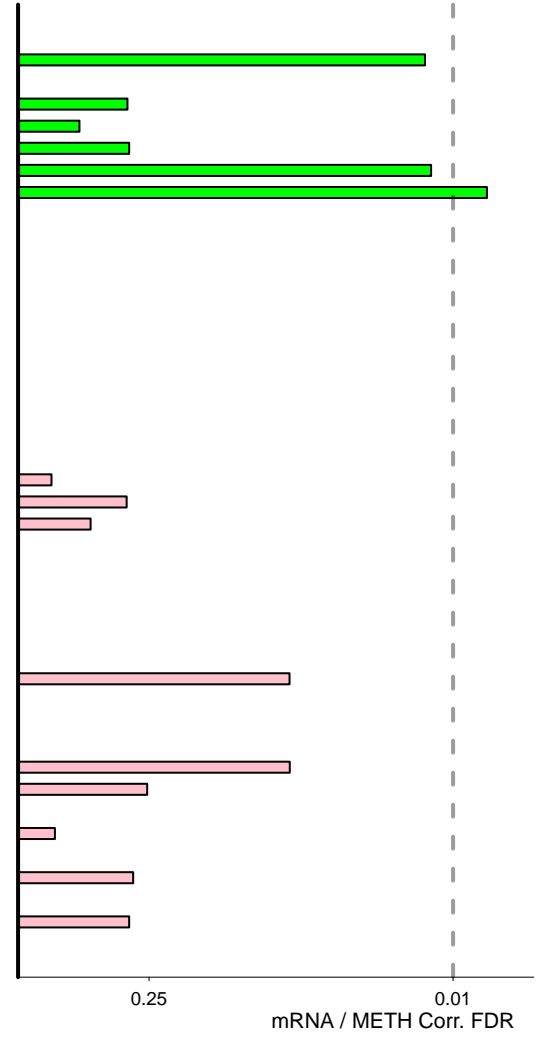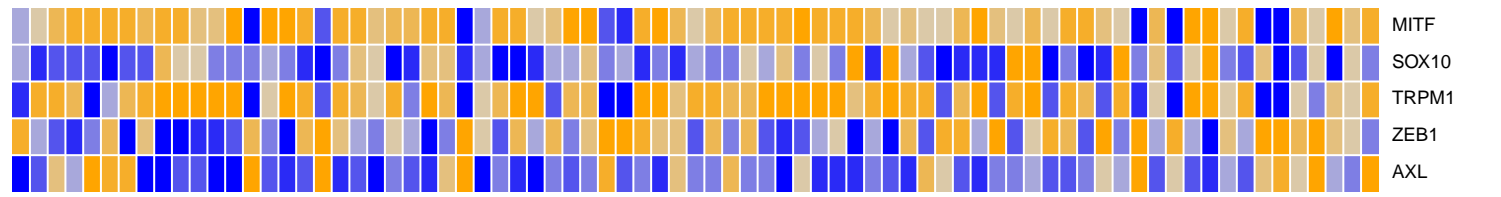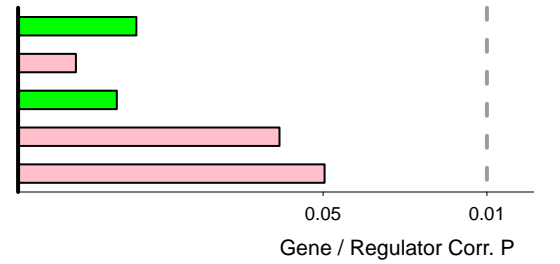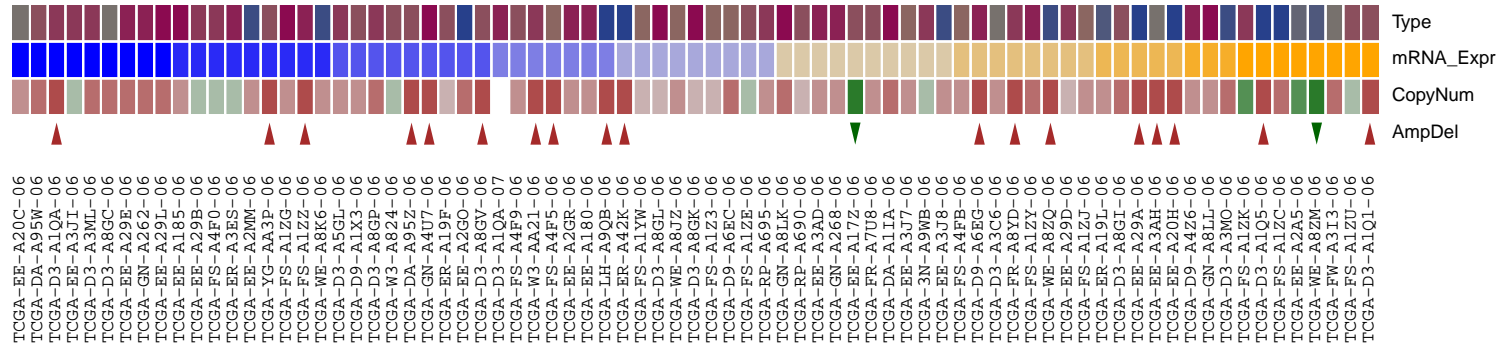

# COL8A1

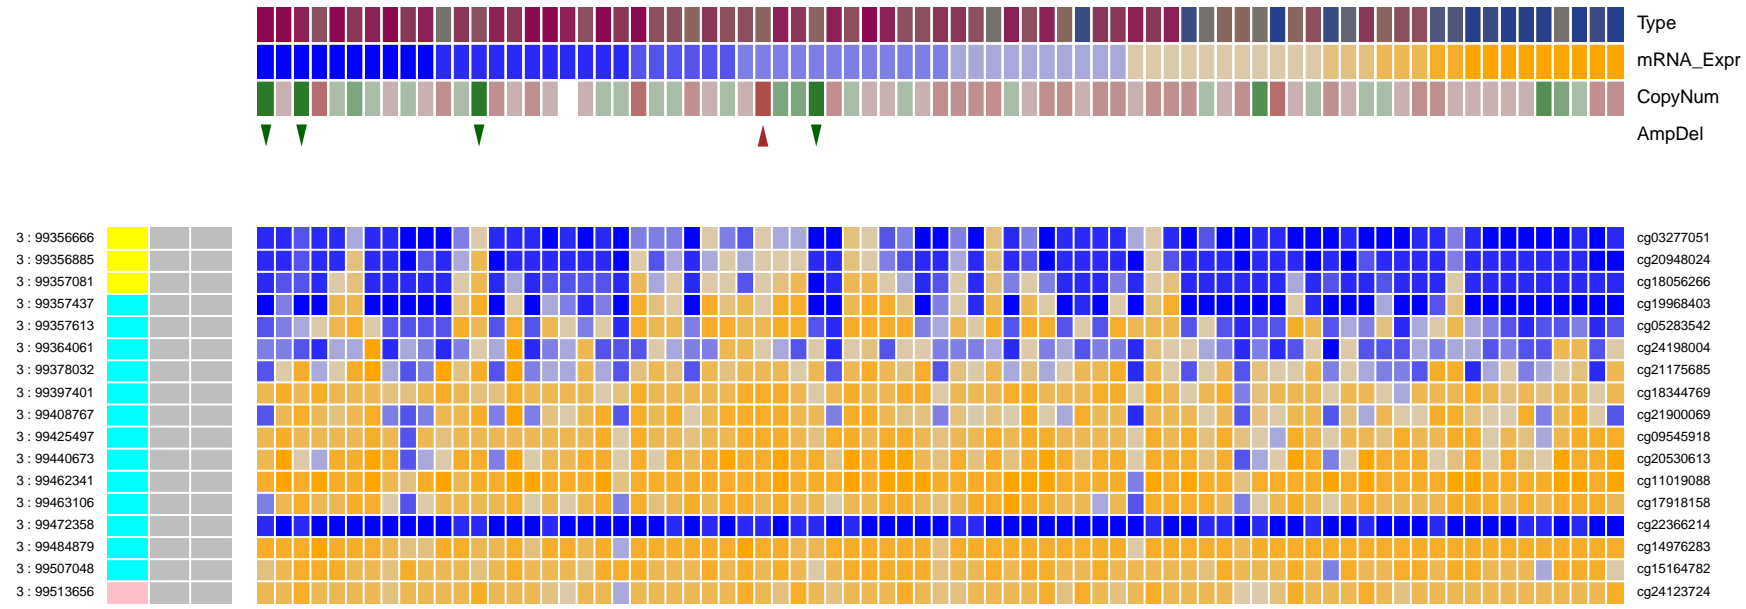

GeneLoc  
PromoterAssoc  
CpGIsland

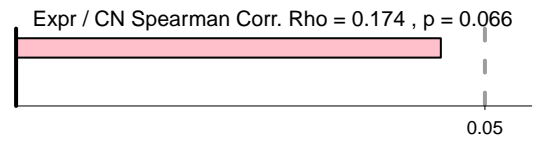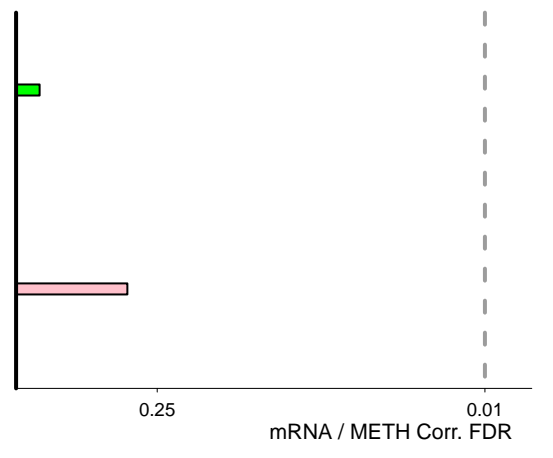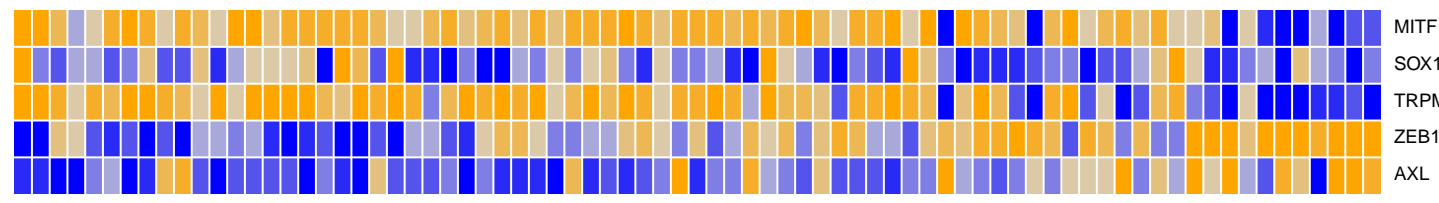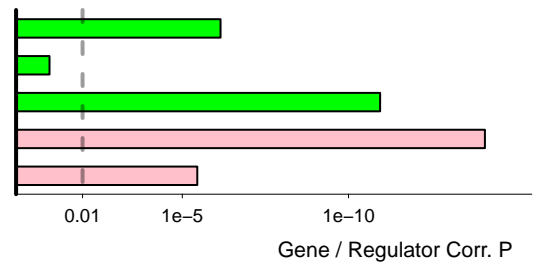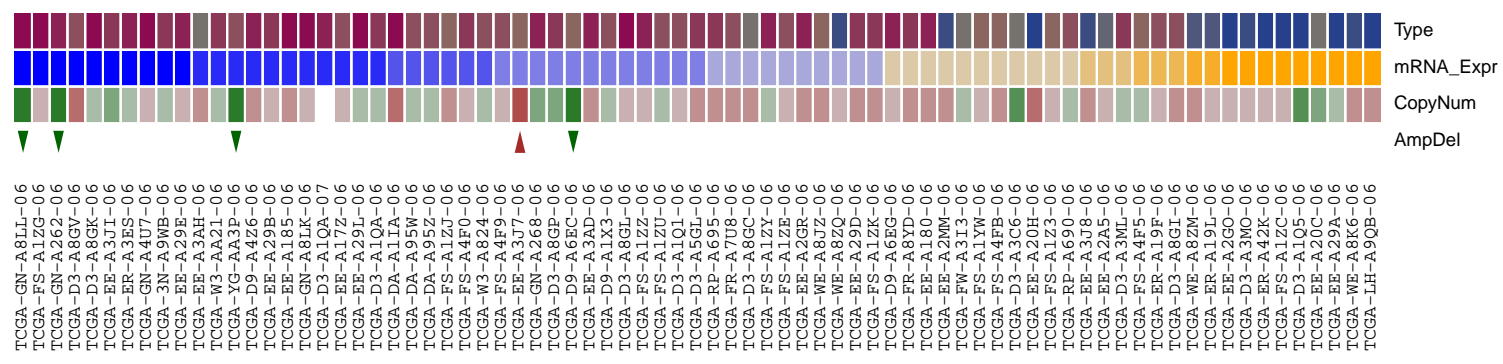

TCGA-GN-A8LL-06  
TCGA-FS-A1ZG-06  
TCGA-GN-A262-06  
TCGA-D3-A8GV-06  
TCGA-D3-A8GK-06  
TCGA-EE-A3JI-06  
TCGA-ER-A3ES-06  
TCGA-GN-A4U7-06  
TCGA-3N-A9WB-06  
TCGA-EE-A29E-06  
TCGA-EE-A3AH-06  
TCGA-W3-AA21-06  
TCGA-YG-AA3P-06  
TCGA-D9-AAZ6-06  
TCGA-EE-A29B-06  
TCGA-EE-A185-06  
TCGA-GN-A8LK-06  
TCGA-D3-A1O6-07  
TCGA-EE-A17Z-06  
TCGA-EE-A25L-06  
TCGA-D3-A1QA-06  
TCGA-DA-A1LA-06  
TCGA-DA-A95W-06  
TCGA-DA-A95Z-06  
TCGA-FS-A1ZJ-06  
TCGA-FS-A4F0-06  
TCGA-W3-A824-06  
TCGA-FS-A4F9-06  
TCGA-EE-A3J7-06  
TCGA-GN-A268-06  
TCGA-D3-A8GF-06  
TCGA-D9-A6EC-06  
TCGA-EE-A3AD-06  
TCGA-D9-A1X3-06  
TCGA-D3-A8GL-06  
TCGA-FS-A1ZZ-06  
TCGA-FS-A1ZU-06  
TCGA-D3-A1Q1-06  
TCGA-D3-A5GL-06  
TCGA-RP-A695-06  
TCGA-FR-A7U8-06  
TCGA-D3-A8GC-06  
TCGA-FS-A1ZY-06  
TCGA-EE-A2GR-06  
TCGA-WE-A8JZ-06  
TCGA-WE-A8ZO-06  
TCGA-EE-A29D-06  
TCGA-FS-A1ZK-06  
TCGA-D9-A6FC-06  
TCGA-ER-A8YD-06  
TCGA-EE-A180-06  
TCGA-EE-A2NM-06  
TCGA-FW-A3I3-06  
TCGA-FS-A1YW-06  
TCGA-FS-A4FB-06  
TCGA-D3-A3C6-06  
TCGA-EE-A20H-06  
TCGA-FS-A1Z3-06  
TCGA-RP-A690-06  
TCGA-EE-A3J8-06  
TCGA-EE-A2A5-06  
TCGA-D3-A3ML-06  
TCGA-FS-A4F5-06  
TCGA-ER-A19F-06  
TCGA-D3-A8GI-06  
TCGA-WE-A8ZM-06  
TCGA-ER-A19L-06  
TCGA-EE-A2GO-06  
TCGA-D3-A3MO-06  
TCGA-ER-A42K-06  
TCGA-FS-A1ZC-06  
TCGA-D3-A1O5-06  
TCGA-EE-A20C-06  
TCGA-EE-A29A-06  
TCGA-WE-A8K6-06  
TCGA-LH-A9QB-06

# CAV1

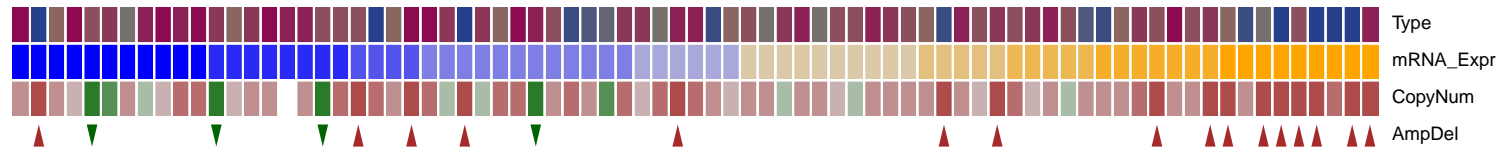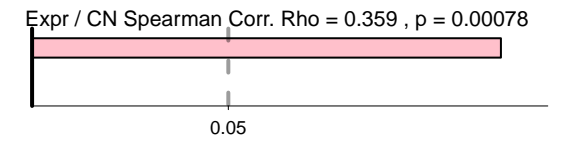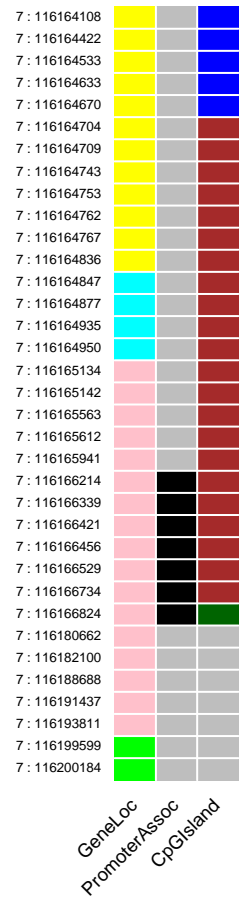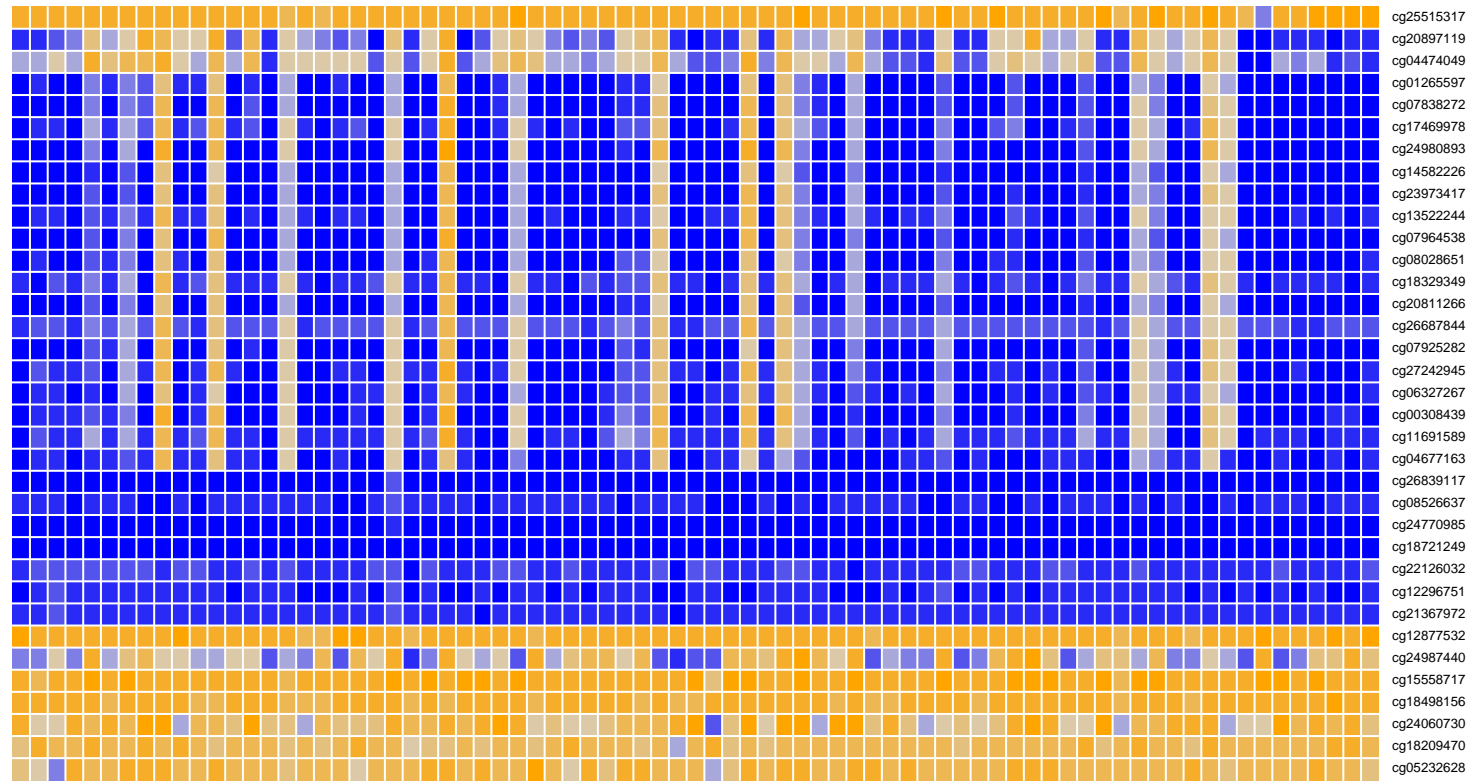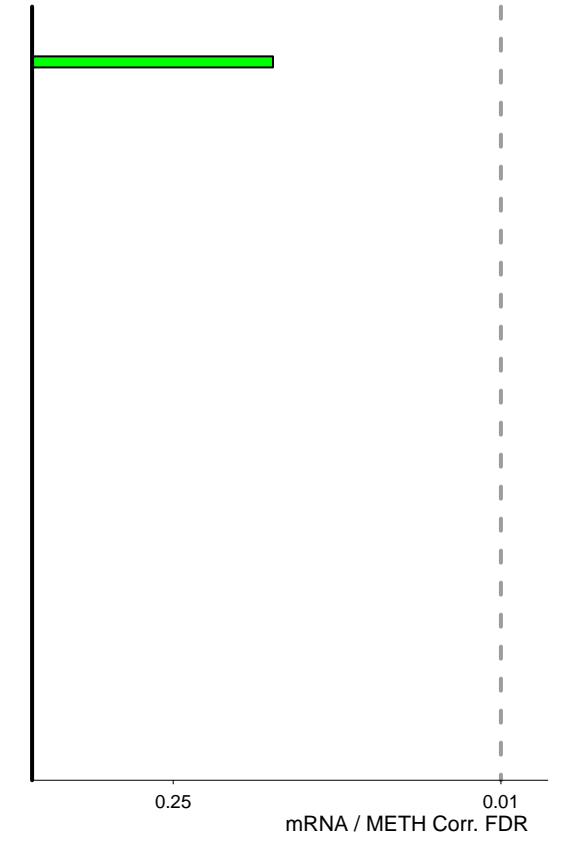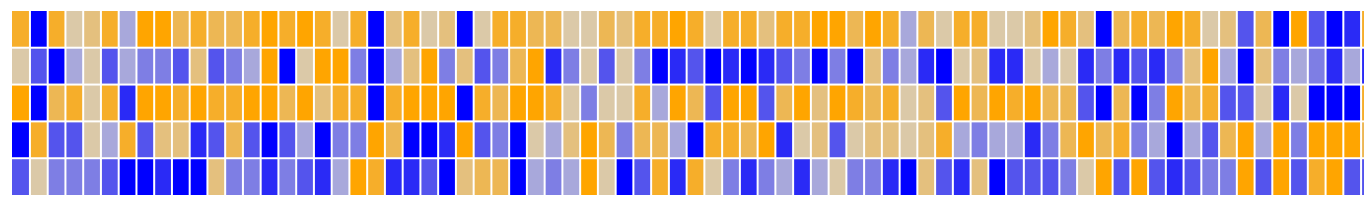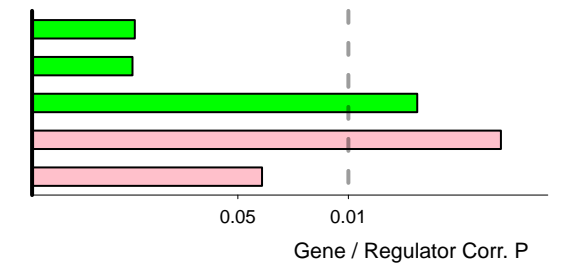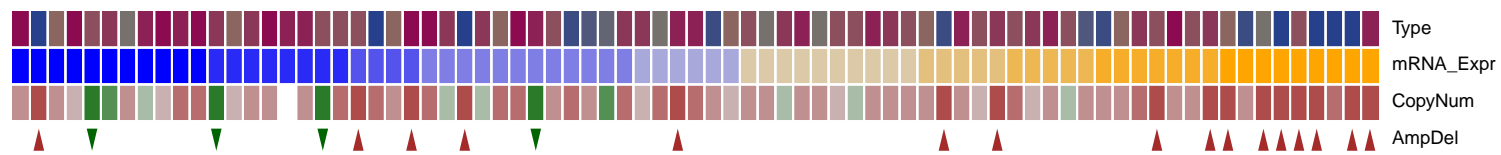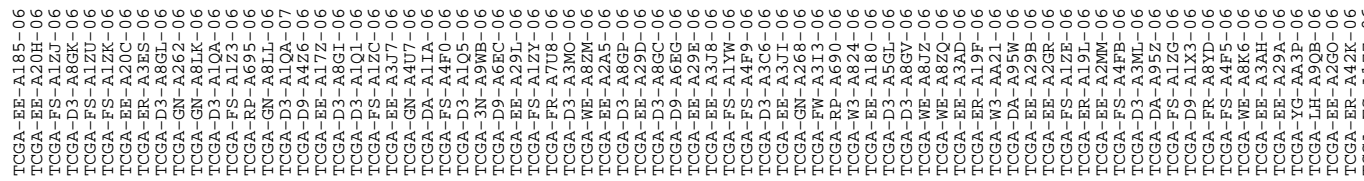

# AOX1

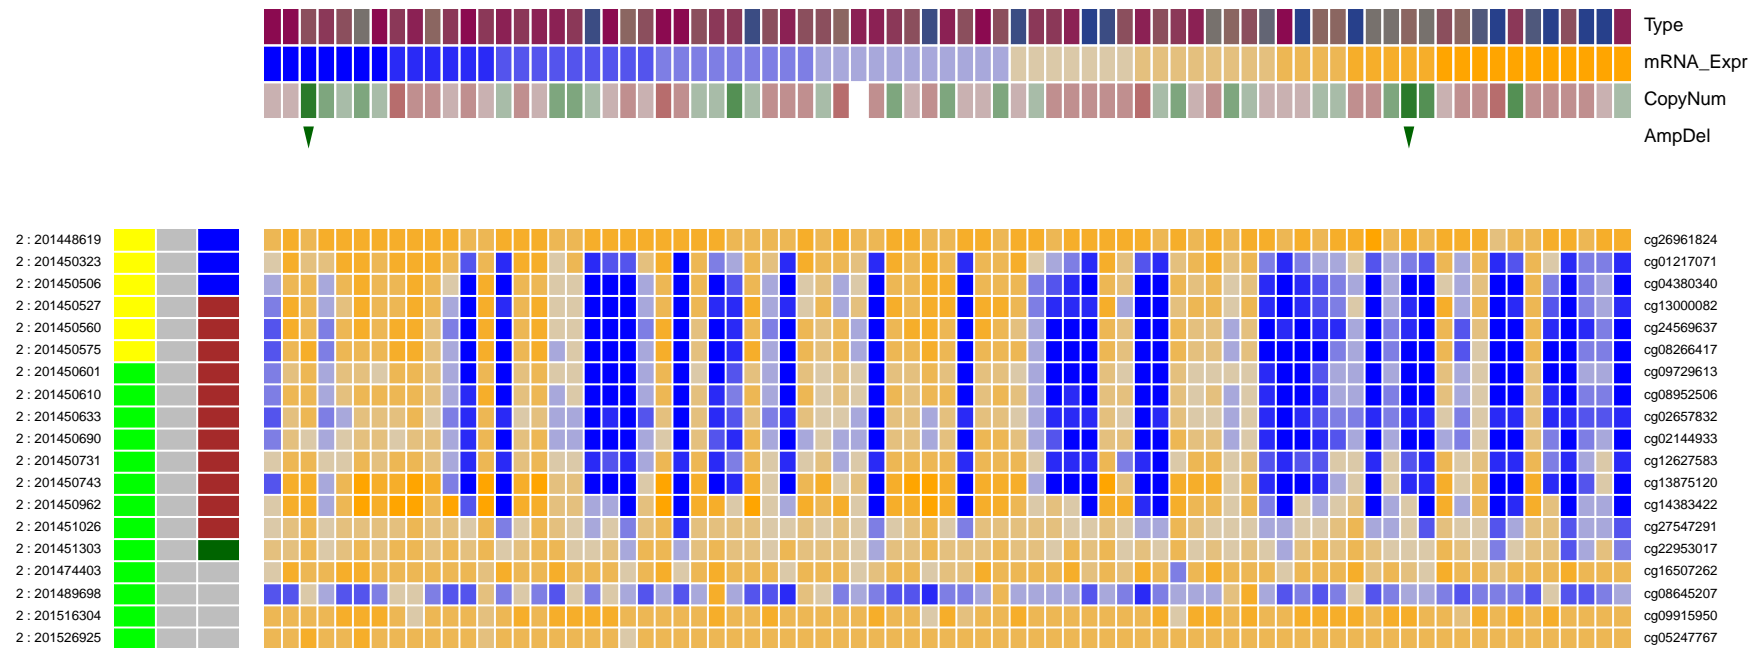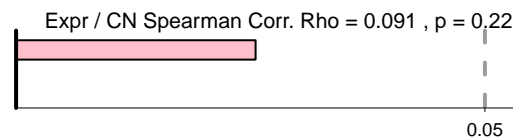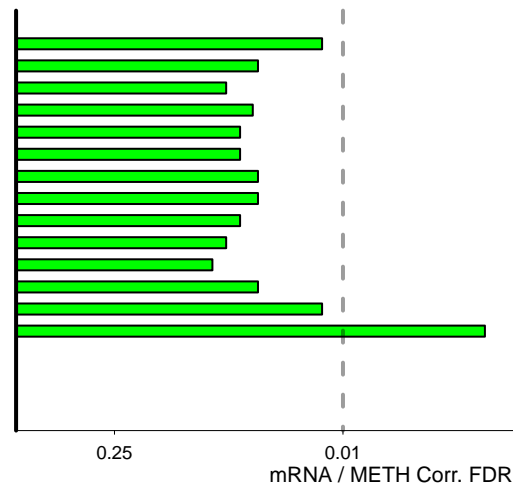

GeneLoc  
PromoterAssoc  
CpGIsland

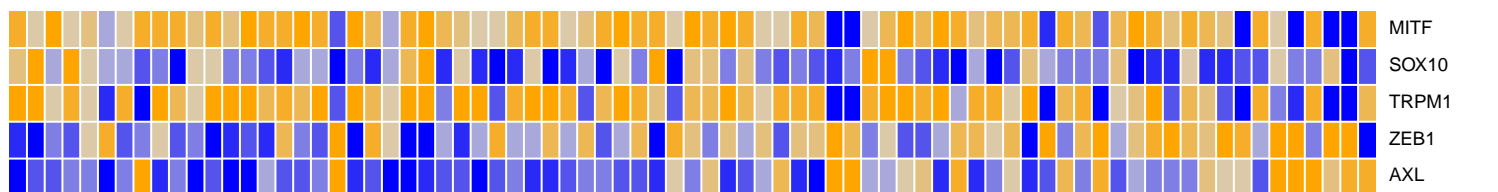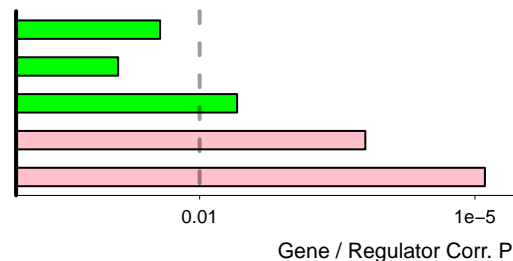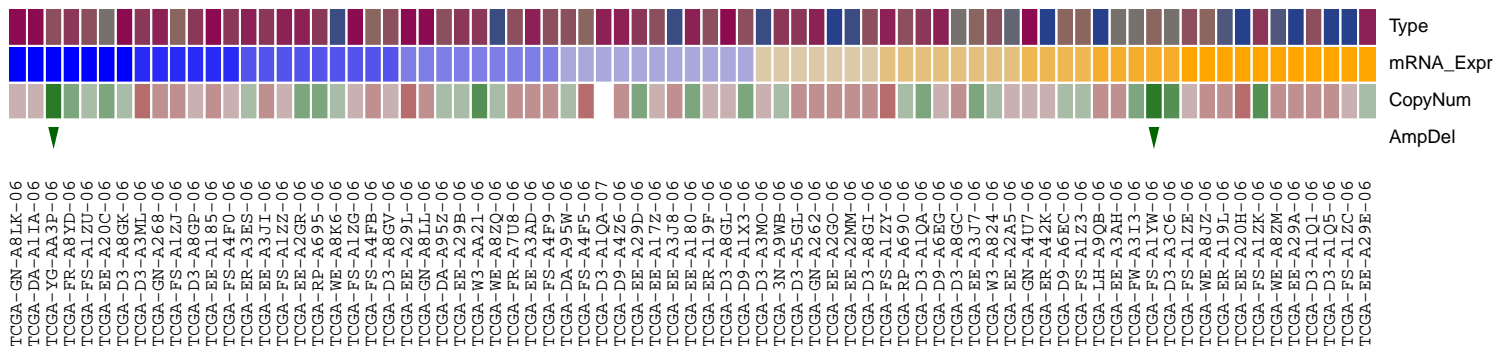

Type  
mRNA\_Expr  
CopyNum  
AmpDel

# PTGFR

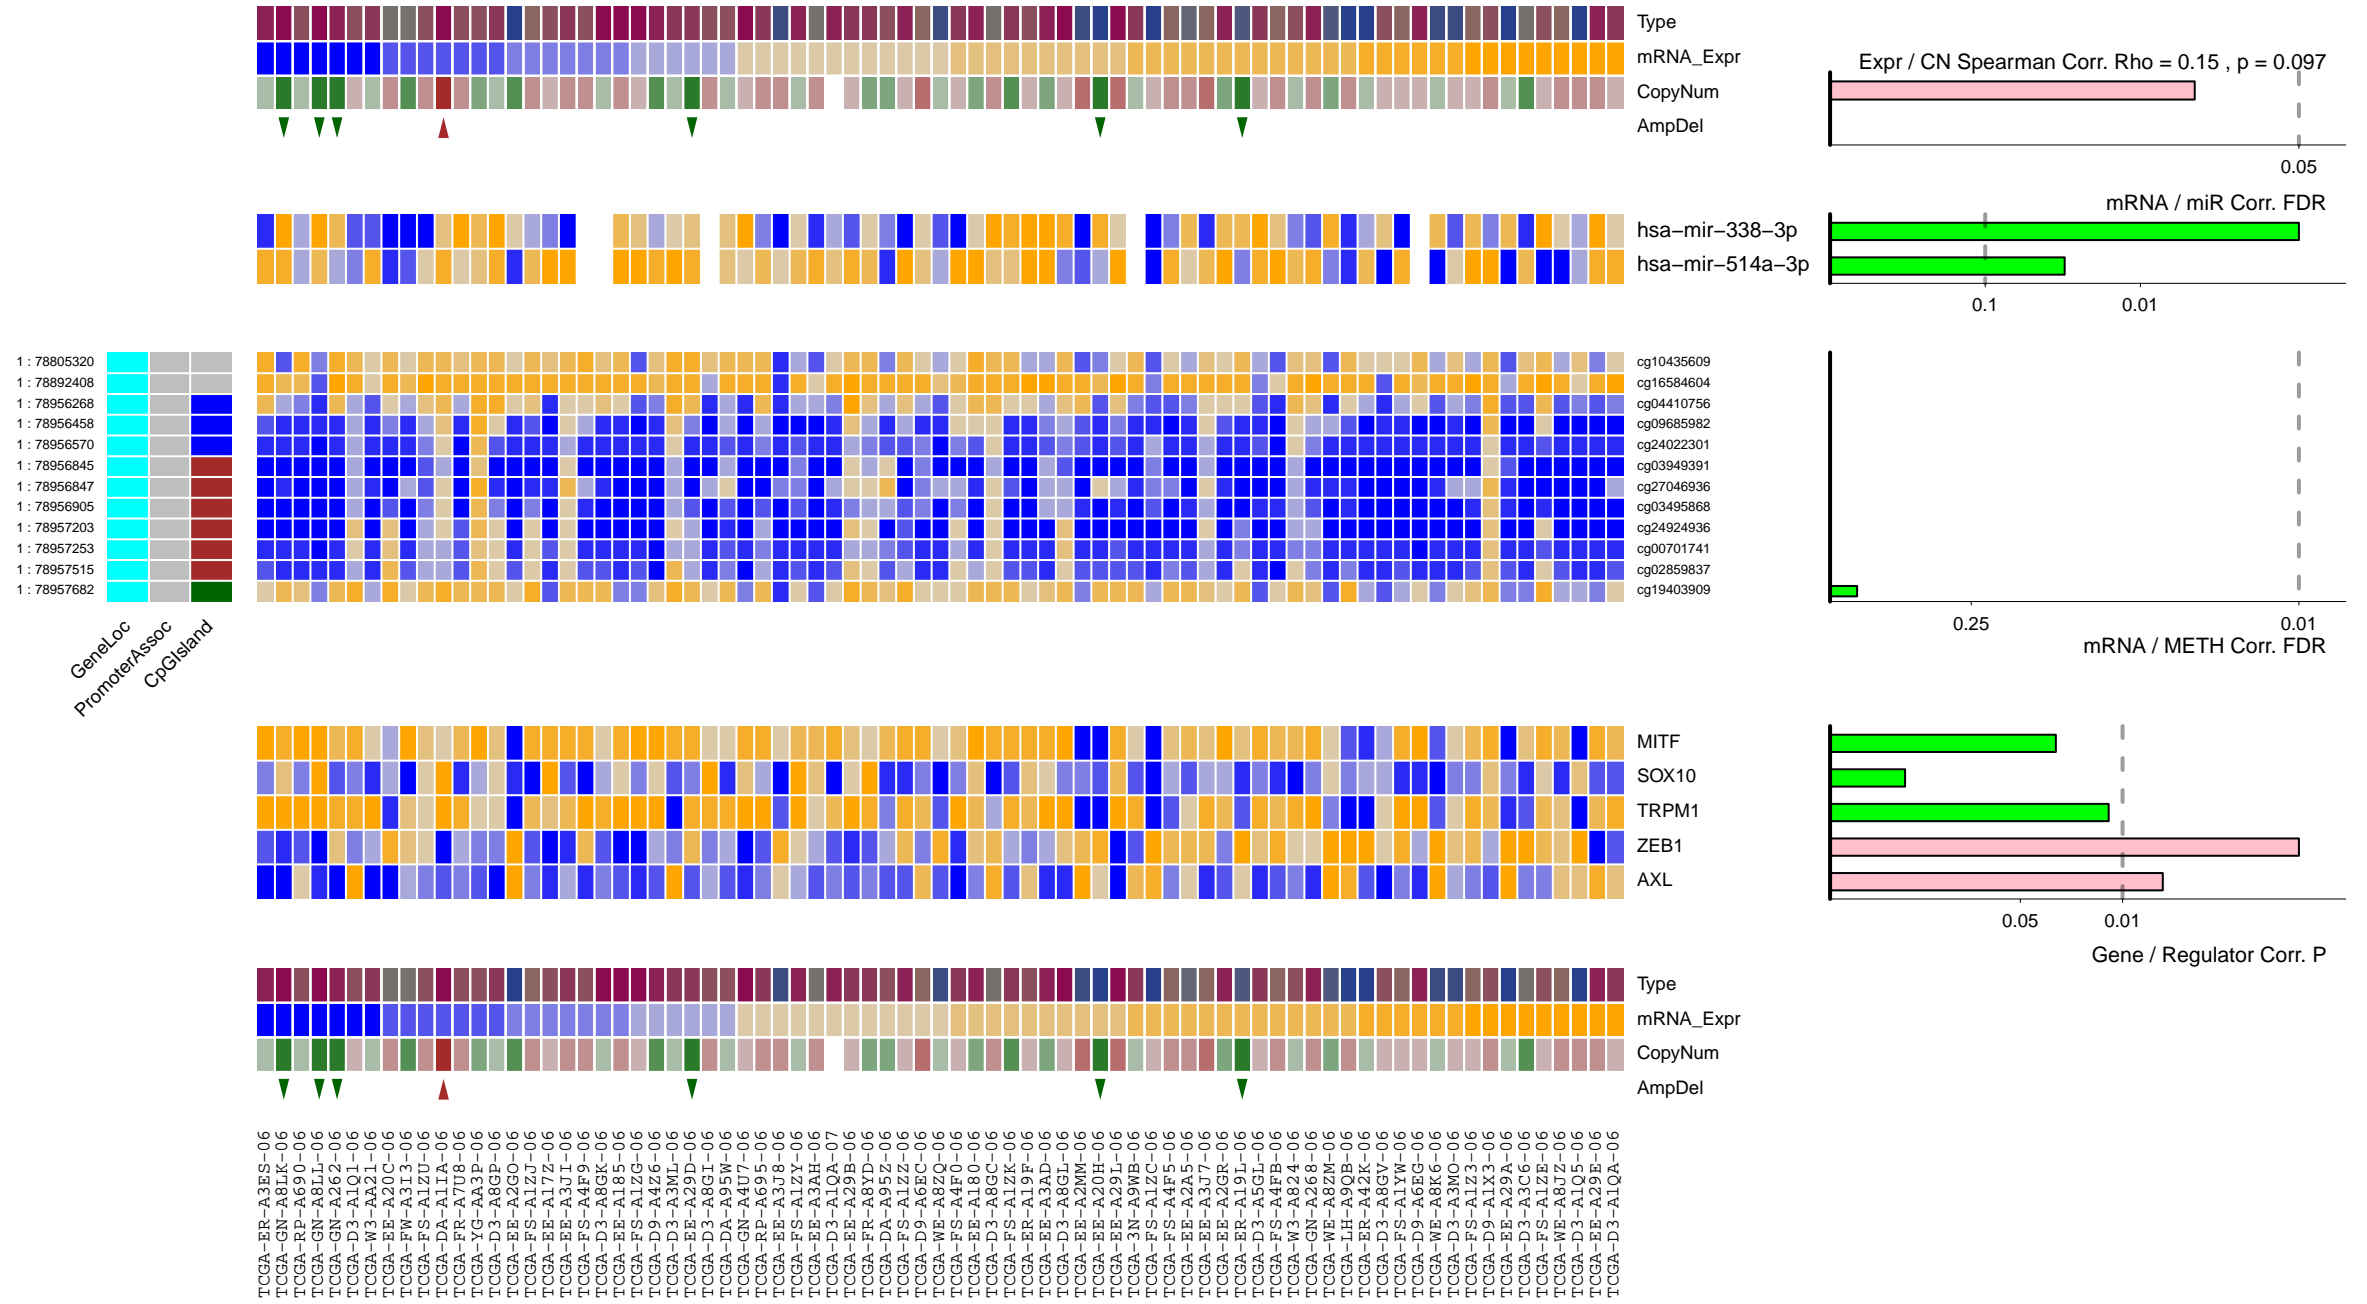

# ALPK2

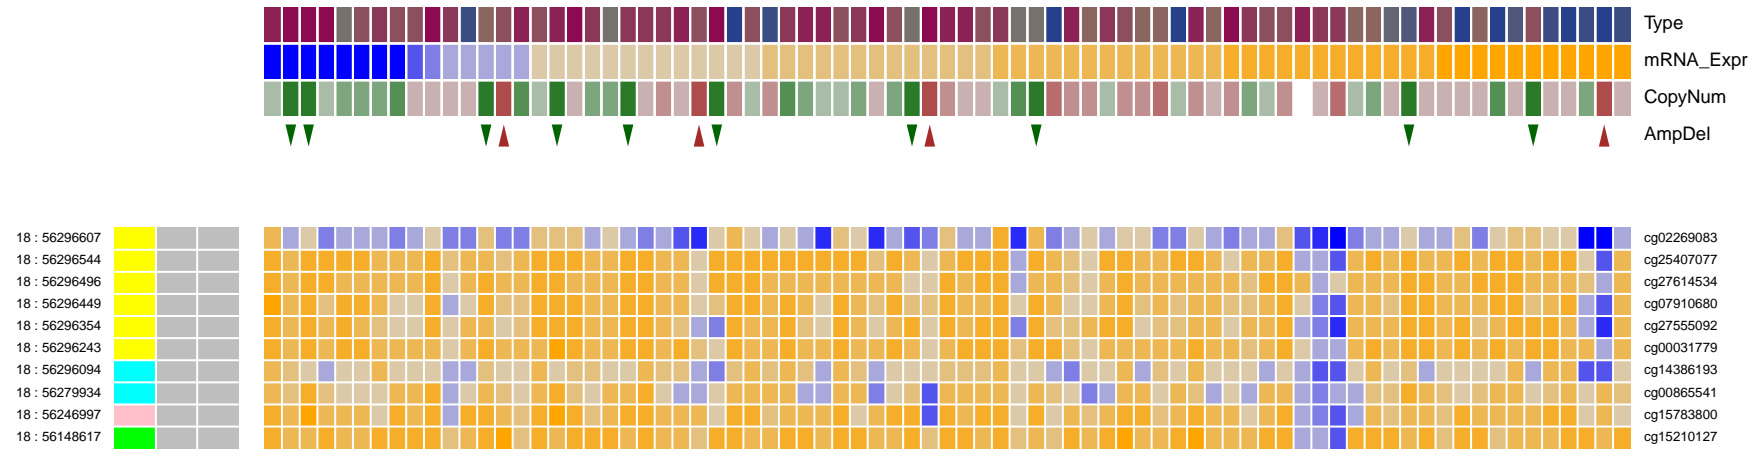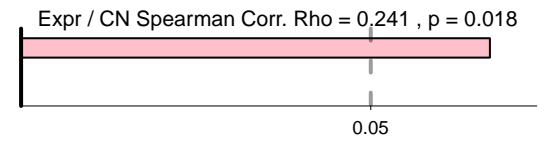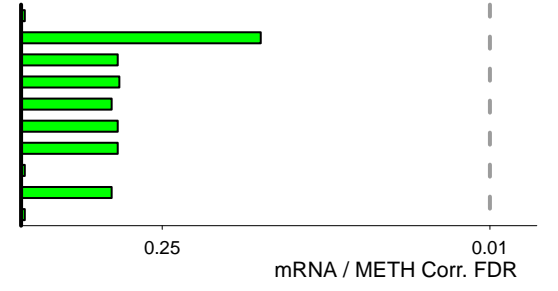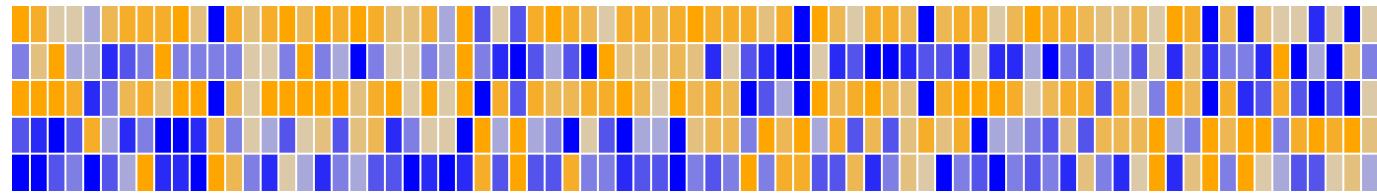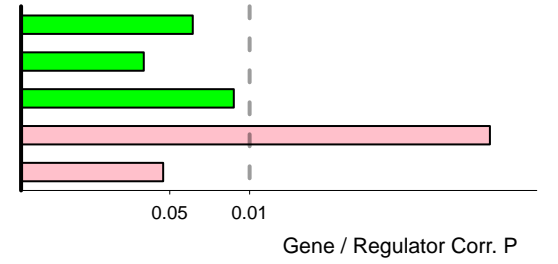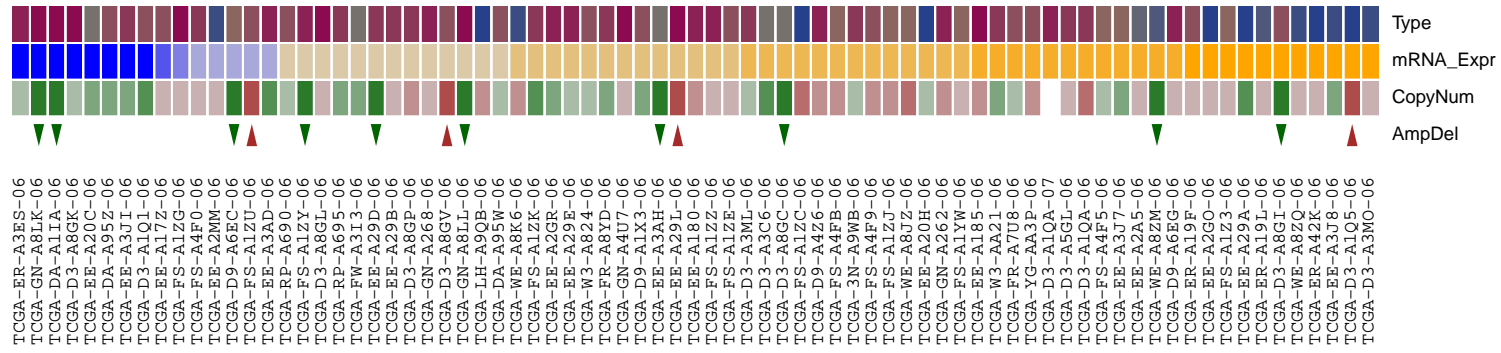

Gene / Regulator Corr. P



# CFH

1 : 196620963  
 1 : 196624484

GeneLoc  
 PromoterAssoc  
 CpGIsland

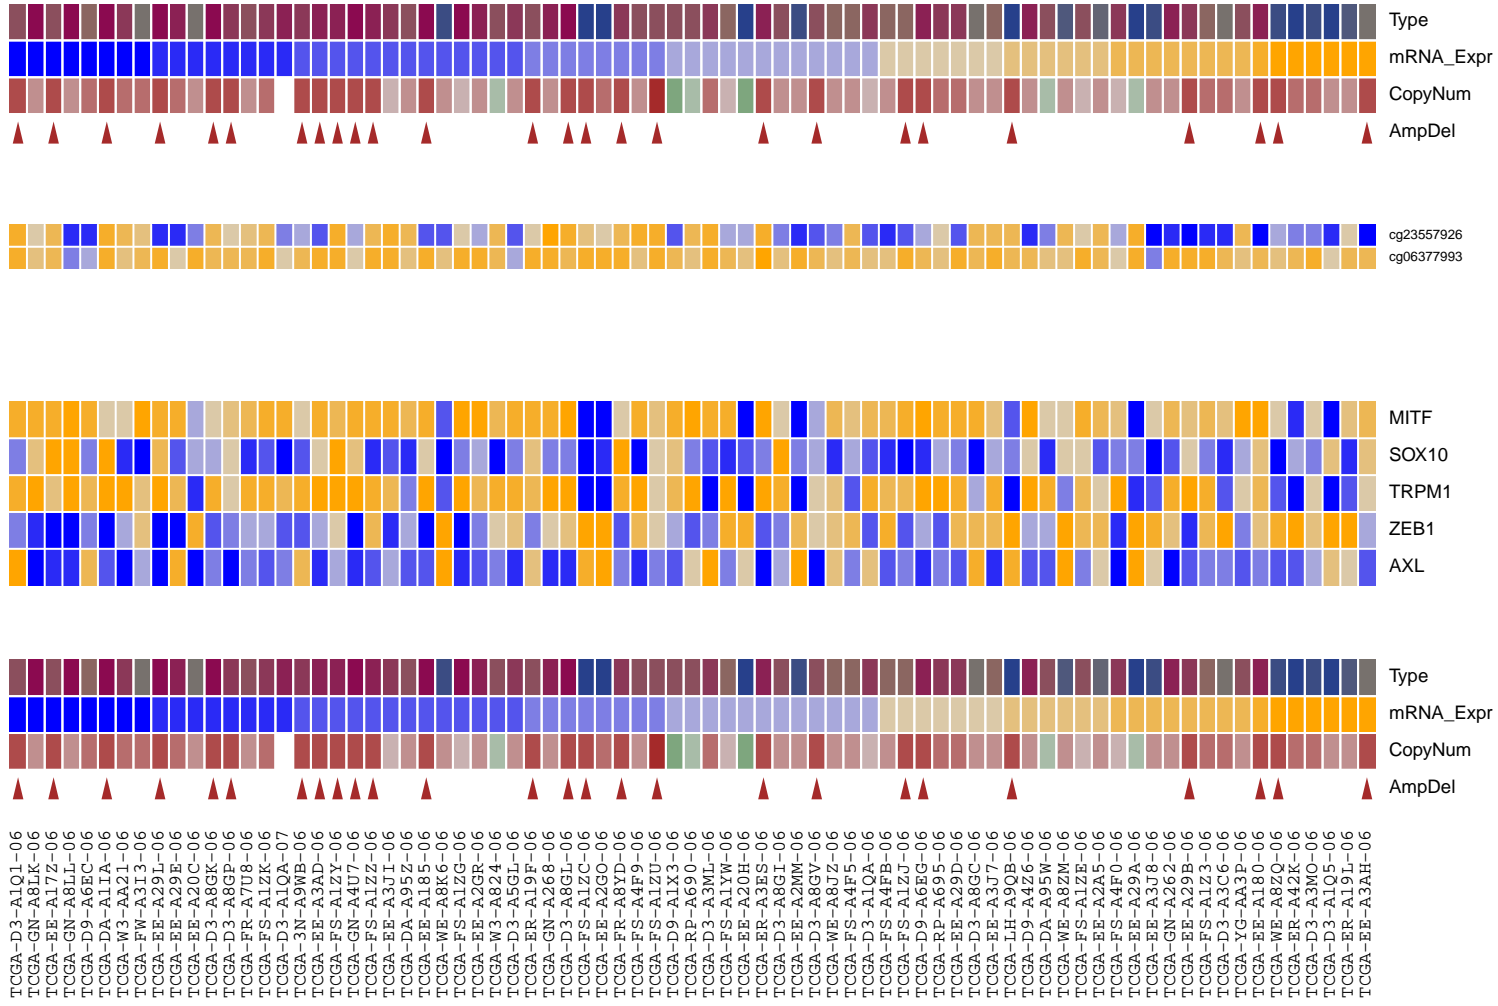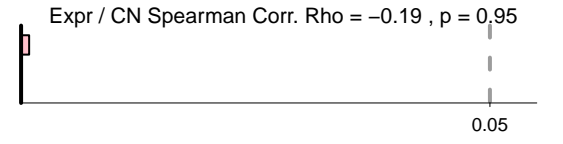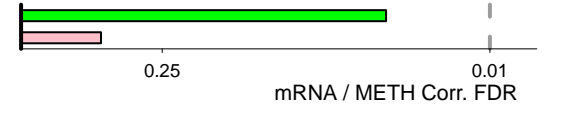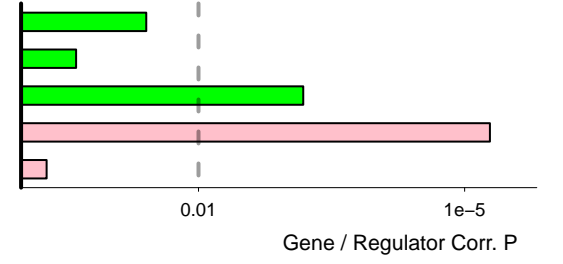

# LPAR1

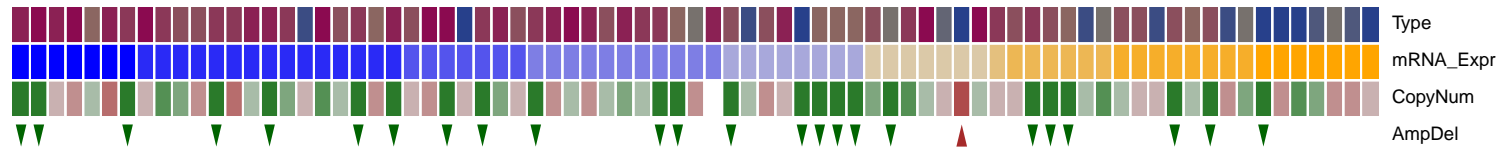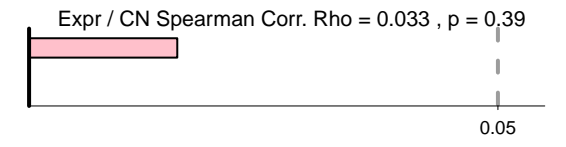

9 : 113802005  
 9 : 113801337  
 9 : 113801320  
 9 : 113800909  
 9 : 113800279  
 9 : 113799936  
 9 : 113799879  
 9 : 113792896  
 9 : 113785563  
 9 : 113778640  
 9 : 113733131  
 9 : 113704153  
 9 : 113658492  
 9 : 113636148

GeneLoc  
 PromoterAssoc  
 CpGIsland

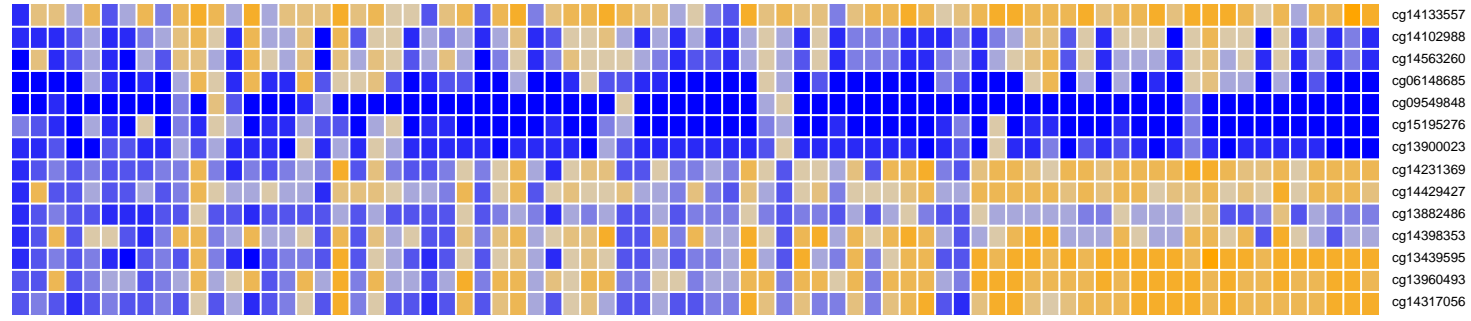

cg14133557  
 cg14102988  
 cg14563260  
 cg06148685  
 cg09549848  
 cg15195276  
 cg13900023  
 cg14231369  
 cg14429427  
 cg13882486  
 cg14398353  
 cg13439595  
 cg13960493  
 cg14317056

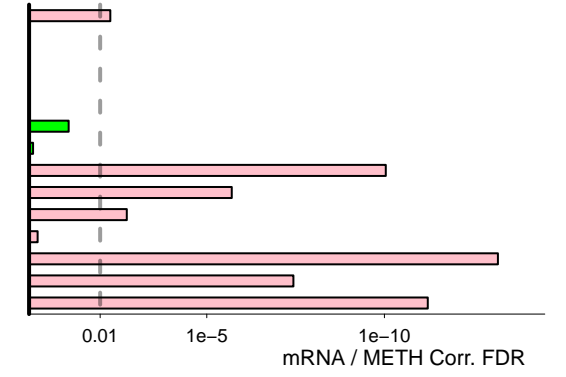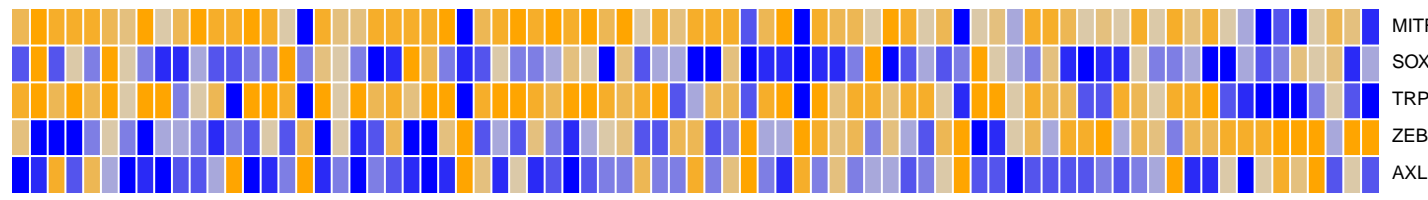

MITF  
 SOX10  
 TRPM1  
 ZEB1  
 AXL

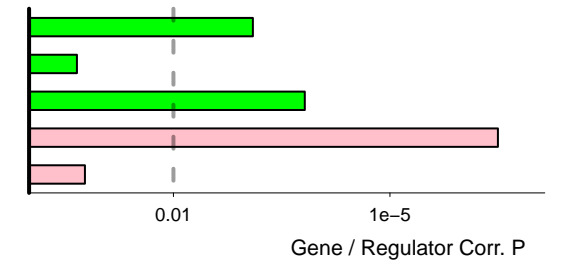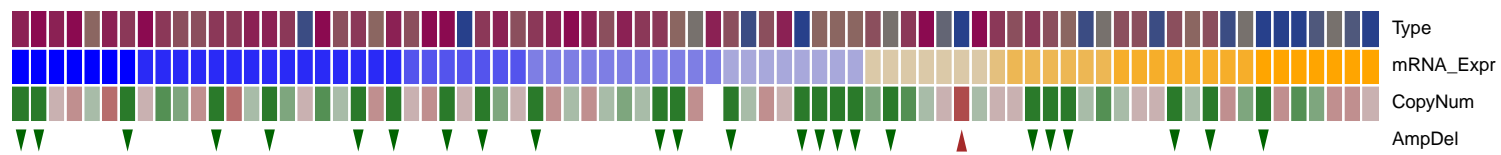

TCGA-GN-A262-06  
 TCGA-GN-A81L-06  
 TCGA-EE-A29E-06  
 TCGA-EE-A185-06  
 TCGA-D9-A6EC-06  
 TCGA-FS-A1ZY-06  
 TCGA-D3-A8GP-06  
 TCGA-FS-A1ZG-06  
 TCGA-W3-AA21-06  
 TCGA-DA-A95Z-06  
 TCGA-YG-AA3P-06  
 TCGA-EE-A3JI-06  
 TCGA-D3-A3ML-06  
 TCGA-ER-A3ES-06  
 TCGA-GN-A268-06  
 TCGA-ER-A8YD-06  
 TCGA-EE-A2MM-06  
 TCGA-GN-A4U7-06  
 TCGA-FS-A4ZU-06  
 TCGA-FS-A4FU-06  
 TCGA-FS-A1ZJ-06  
 TCGA-FS-A1ZZ-06  
 TCGA-EE-A17Z-06  
 TCGA-EE-A29L-06  
 TCGA-D3-A8GL-06  
 TCGA-EE-A2GO-06  
 TCGA-D3-A1QA-06  
 TCGA-EE-A3AD-06  
 TCGA-EP-A690-06  
 TCGA-D3-A5GL-06  
 TCGA-EE-A2GR-06  
 TCGA-GN-A8LK-06  
 TCGA-D9-A4Z6-06  
 TCGA-W3-A824-06  
 TCGA-EE-A180-06  
 TCGA-3N-A9WB-06  
 TCGA-RP-A695-06  
 TCGA-FS-A4F5-06  
 TCGA-D3-A8GC-06  
 TCGA-D3-A1QA-07  
 TCGA-ER-A19F-06  
 TCGA-WE-A8K6-06  
 TCGA-FR-A7U8-06  
 TCGA-D9-A6EG-06  
 TCGA-FS-A1ZC-06  
 TCGA-FS-A1YW-06  
 TCGA-WE-A8TZ-06  
 TCGA-FS-A1Z3-06  
 TCGA-D3-A8GI-06  
 TCGA-FW-A3I3-06  
 TCGA-FS-A1ZK-06  
 TCGA-D3-A8GK-06  
 TCGA-EE-A2A3-06  
 TCGA-EE-A29A-06  
 TCGA-DA-A1IA-06  
 TCGA-EE-A29B-06  
 TCGA-D3-A8GV-06  
 TCGA-EE-A29D-06  
 TCGA-D9-A1X3-06  
 TCGA-FS-A4FB-06  
 TCGA-WE-A8ZQ-06  
 TCGA-D3-A3C6-06  
 TCGA-DA-A95W-06  
 TCGA-FS-A1ZE-06  
 TCGA-D3-A3MO-06  
 TCGA-D3-A1Q1-06  
 TCGA-EE-A3J7-06  
 TCGA-FS-A4F9-06  
 TCGA-EE-A3J8-06  
 TCGA-EE-A20C-06  
 TCGA-EE-A20H-06  
 TCGA-LH-A9OB-06  
 TCGA-D3-A1O5-06  
 TCGA-WE-A8ZM-06  
 TCGA-EE-A3AH-06  
 TCGA-ER-A19L-06  
 TCGA-ER-A42K-06

### F3

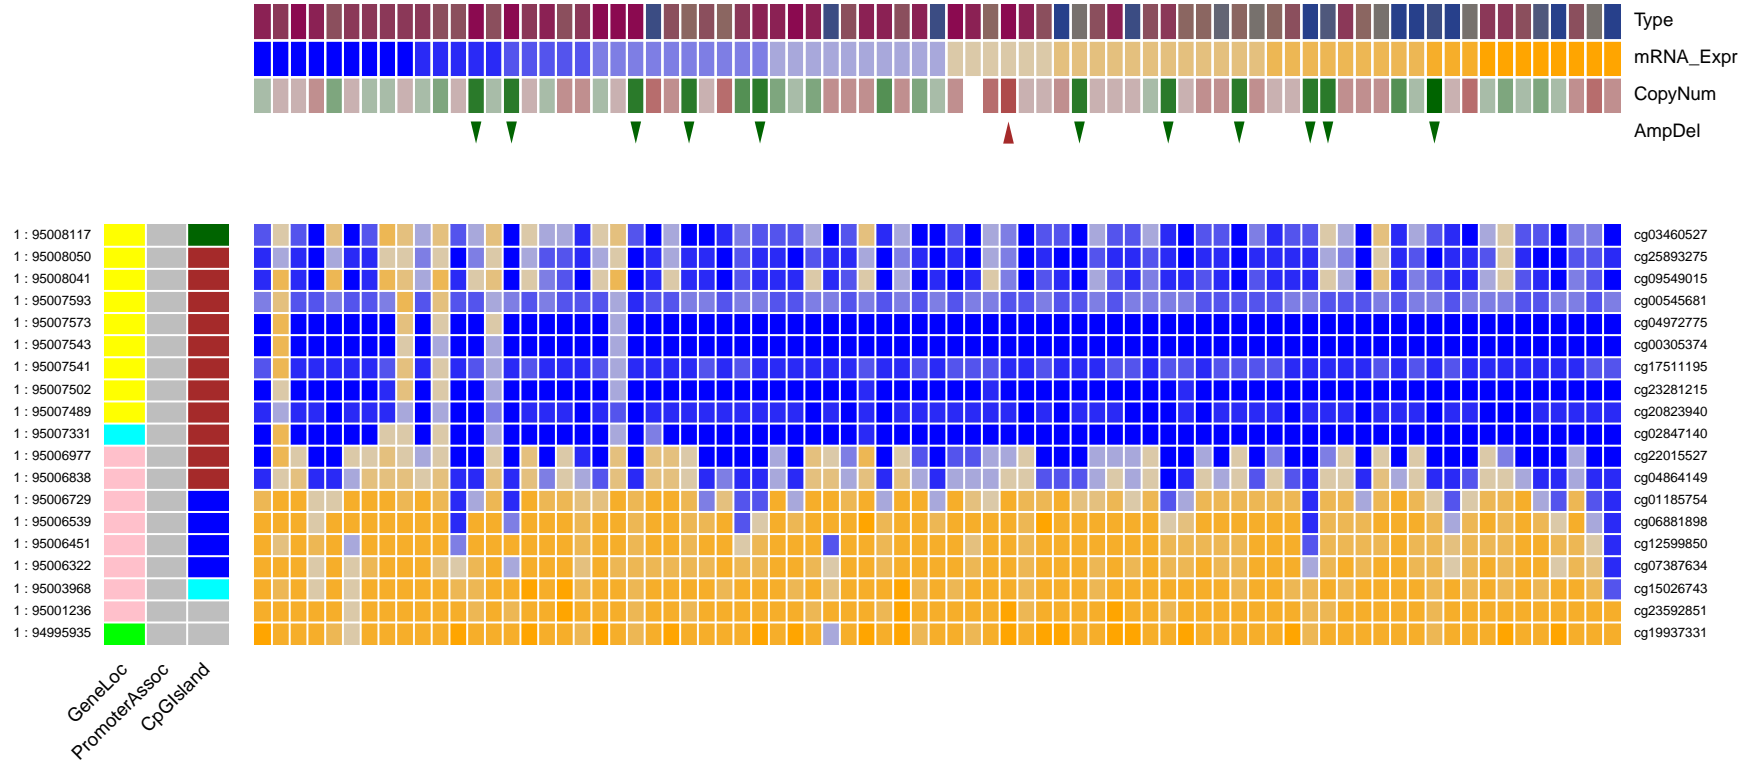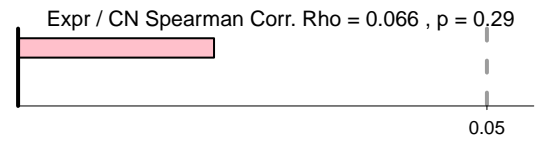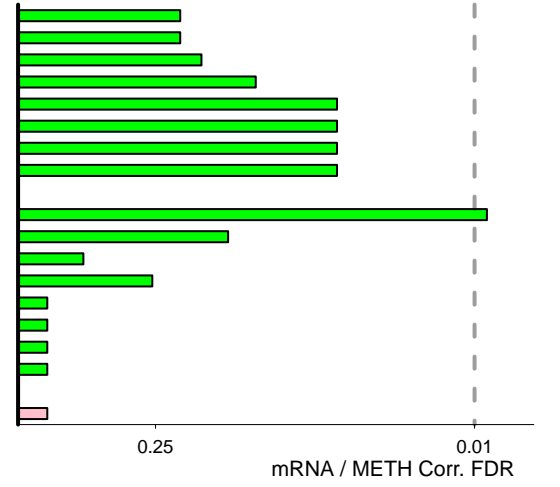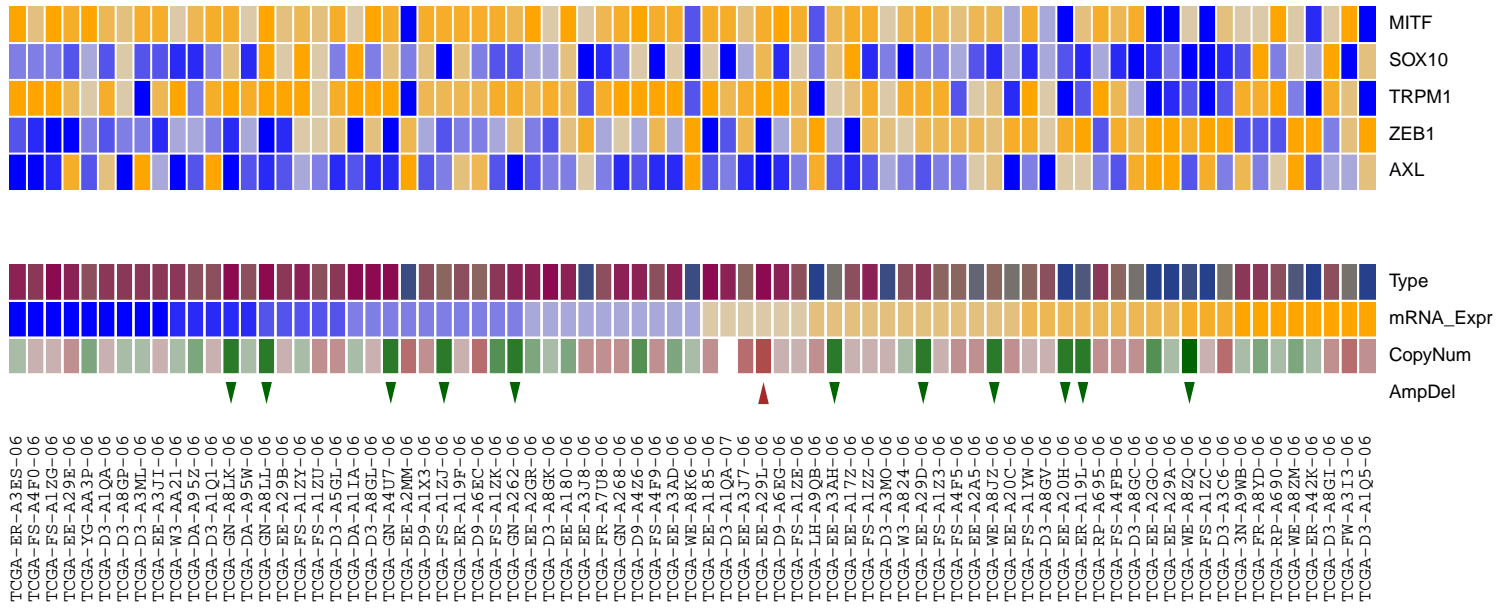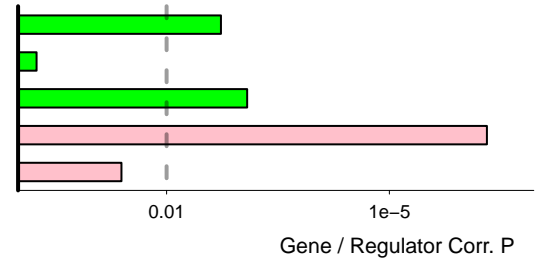

TCGA-ER-A3ES-06  
 TCGA-FS-A4FO-06  
 TCGA-FS-A1ZG-06  
 TCGA-EE-A29E-06  
 TCGA-YG-AA3P-06  
 TCGA-D3-A1QA-06  
 TCGA-D3-A8GF-06  
 TCGA-D3-A3ML-06  
 TCGA-EE-A3JI-06  
 TCGA-W3-AA21-06  
 TCGA-DA-A95Z-06  
 TCGA-D3-A1O1-06  
 TCGA-GN-A8LK-06  
 TCGA-DA-A95W-06  
 TCGA-GN-A8LI-06  
 TCGA-EE-A29E-06  
 TCGA-FS-A1ZY-06  
 TCGA-FS-A1ZU-06  
 TCGA-D3-A5GL-06  
 TCGA-DA-A1IA-06  
 TCGA-D3-A8GL-06  
 TCGA-GN-A4U7-06  
 TCGA-EE-A2MM-06  
 TCGA-D9-A1X3-06  
 TCGA-FS-A1ZU-06  
 TCGA-ER-A19F-06  
 TCGA-D9-A6EC-06  
 TCGA-FS-A1ZK-06  
 TCGA-GN-A262-06  
 TCGA-EE-A2GR-06  
 TCGA-D3-A8GK-06  
 TCGA-EE-A180-06  
 TCGA-EE-A3J8-06  
 TCGA-FR-A7U8-06  
 TCGA-GN-A268-06  
 TCGA-D9-A4Z6-06  
 TCGA-FS-A4F9-06  
 TCGA-EE-A3AD-06  
 TCGA-WE-A8K6-06  
 TCGA-EE-A185-06  
 TCGA-D3-A1QA-07  
 TCGA-EE-A3J7-06  
 TCGA-EE-A29I-06  
 TCGA-D9-A6EG-06  
 TCGA-FS-A1ZF-06  
 TCGA-LH-A9OB-06  
 TCGA-EE-A3AH-06  
 TCGA-EE-A17Z-06  
 TCGA-FS-A1ZZ-06  
 TCGA-D3-A3MG-06  
 TCGA-M3-A82A-06  
 TCGA-EE-A29D-06  
 TCGA-FS-A1Z3-06  
 TCGA-FS-A4FS-06  
 TCGA-EE-A2A5-06  
 TCGA-WE-A8JZ-06  
 TCGA-EE-A20C-06  
 TCGA-FS-A1YW-06  
 TCGA-D3-A8GV-06  
 TCGA-EE-A20H-06  
 TCGA-ER-A19L-06  
 TCGA-RP-A695-06  
 TCGA-FS-A4FB-06  
 TCGA-D3-A8GC-06  
 TCGA-EE-A2GG-06  
 TCGA-EE-A29A-06  
 TCGA-WE-A8ZQ-06  
 TCGA-FS-A1ZC-06  
 TCGA-D3-A3C6-06  
 TCGA-3N-A9WE-06  
 TCGA-FR-A8YD-06  
 TCGA-RP-A690-06  
 TCGA-WE-A8ZM-06  
 TCGA-ER-A42K-06  
 TCGA-D3-A8G1-06  
 TCGA-FW-A3I3-06  
 TCGA-D3-A1Q5-06

# CNN2

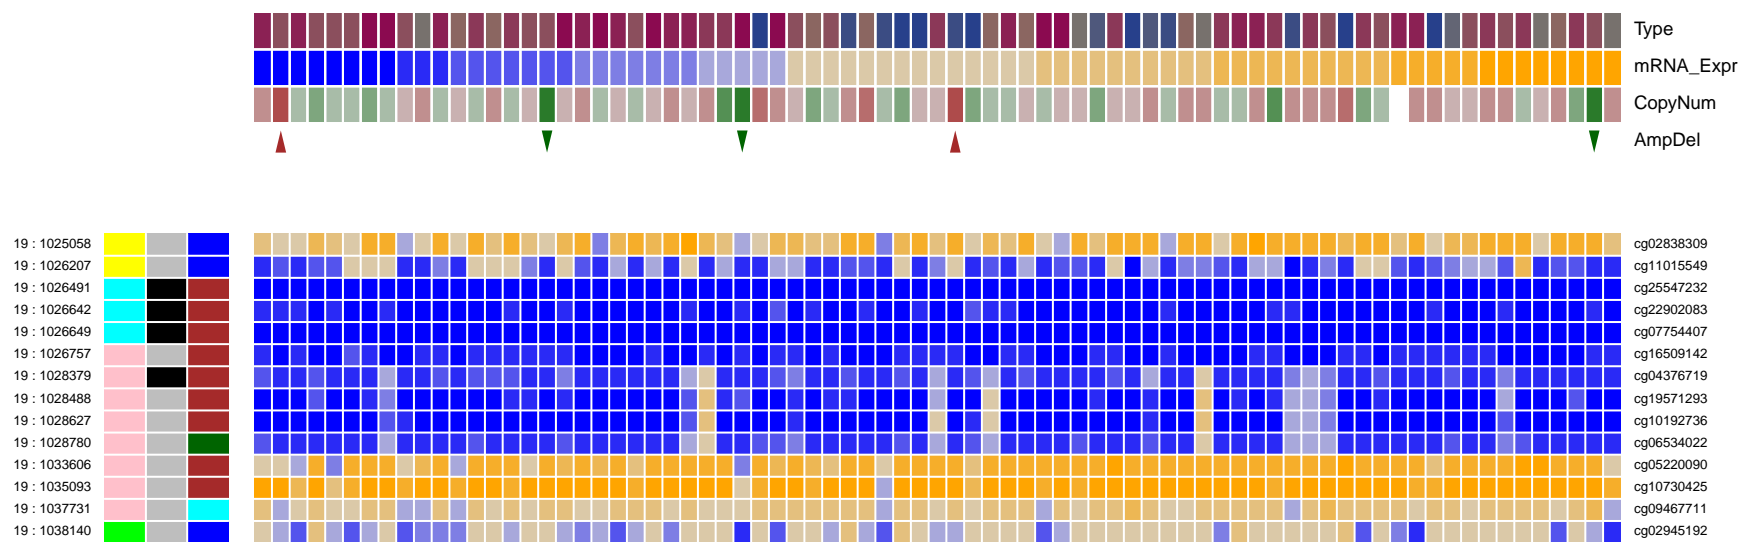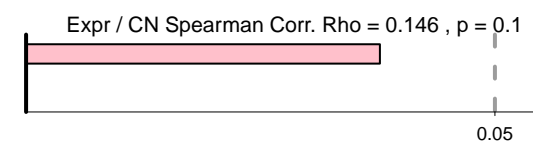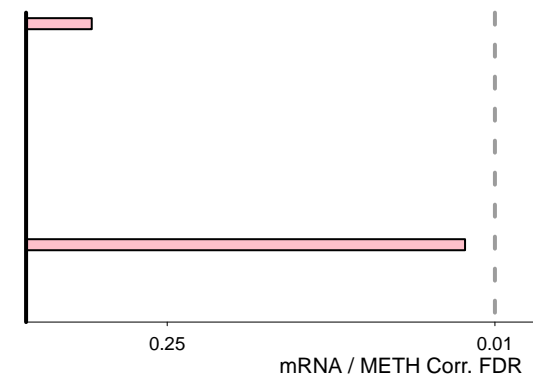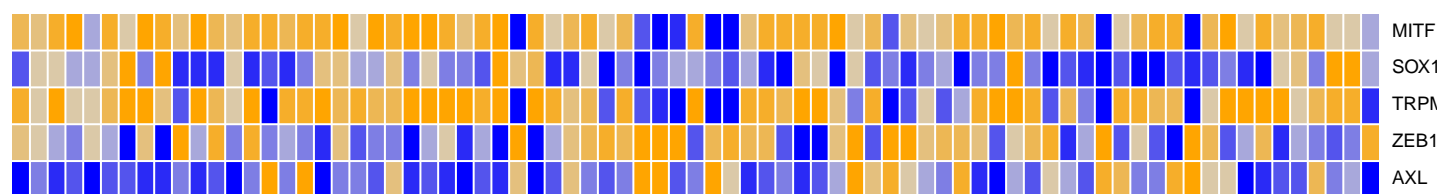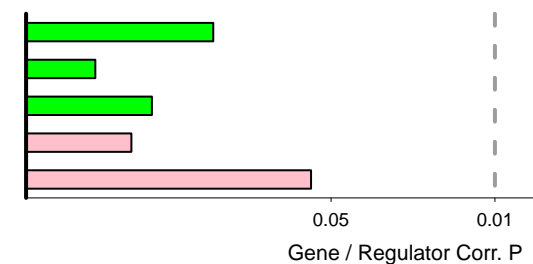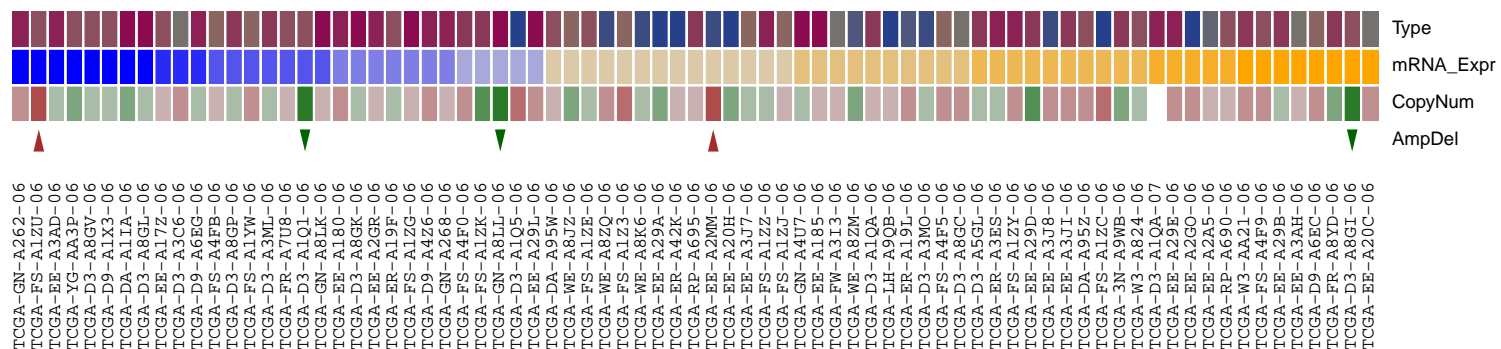

# MAP1B

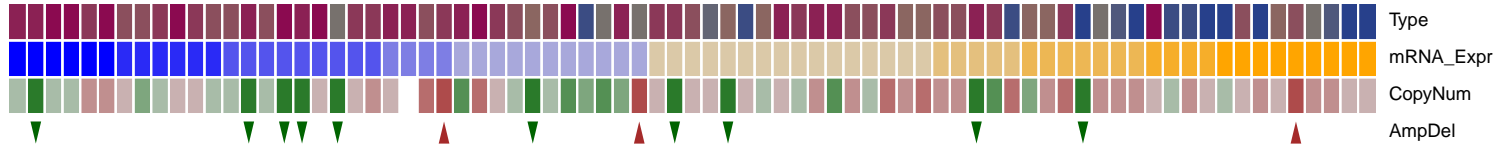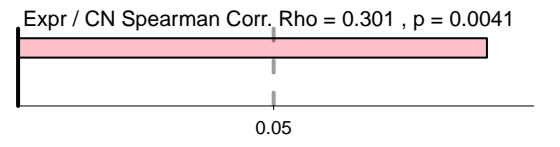

5: 71402031  
5: 71402641  
5: 71402893  
5: 71403045  
5: 71403058  
5: 71403320  
5: 71403420  
5: 71403502  
5: 71403804  
5: 71403990  
5: 71404193  
5: 71404443  
5: 71404593  
5: 71404742  
5: 71404897  
5: 71407465  
5: 71418531  
5: 71429185  
5: 71441596  
5: 71449785  
5: 71452580  
5: 71455811  
5: 71462729  
5: 71475111  
5: 71475303  
5: 71475356  
5: 71478626  
5: 71503901

GeneLoc  
PromoterAssoc  
CpGIsland

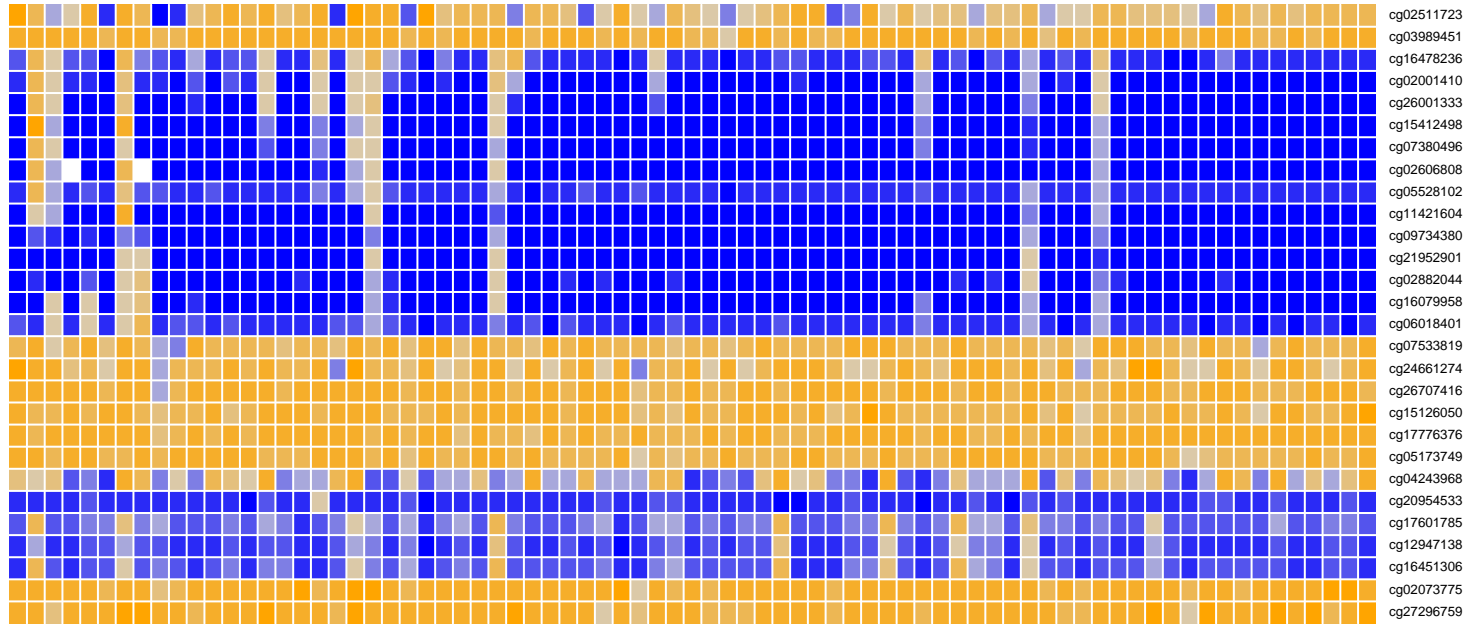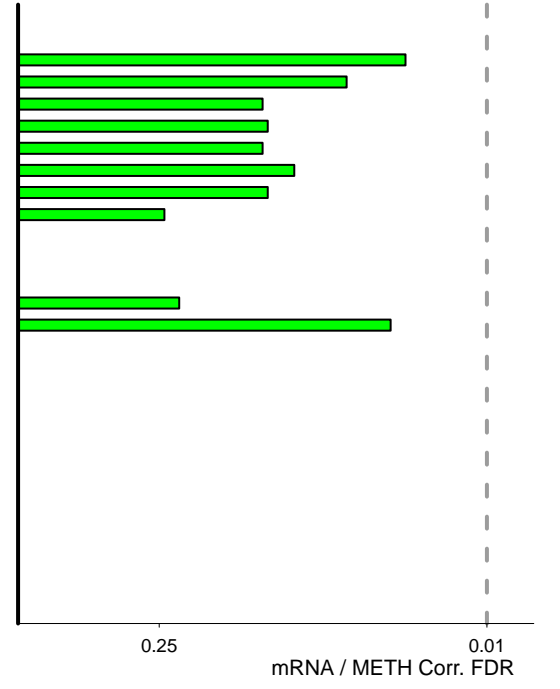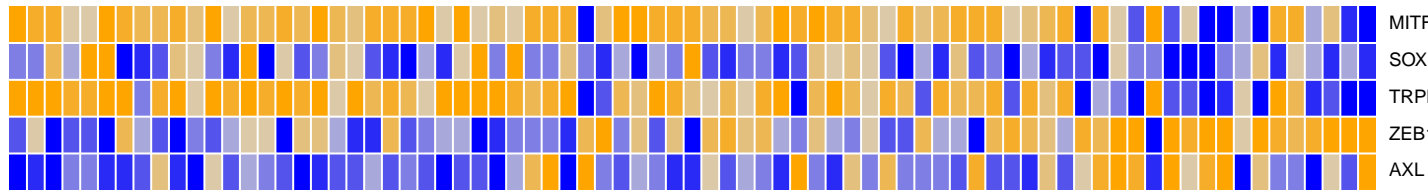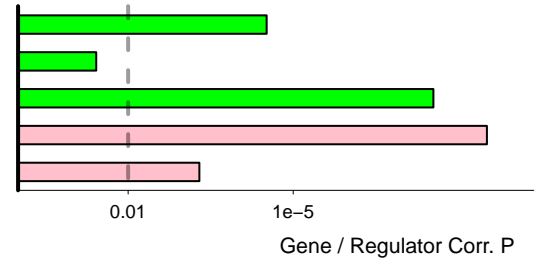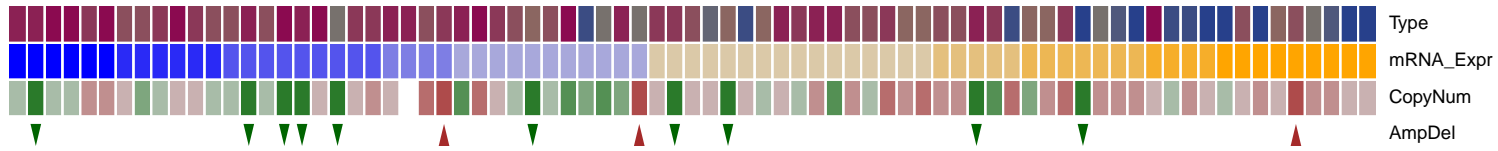

TCGA-ER-A3ES-06  
TCGA-GN-A268-06  
TCGA-EE-A29L-06  
TCGA-D3-A8GK-06  
TCGA-FR-A8YD-06  
TCGA-GN-A8LL-06  
TCGA-FS-A4F9-06  
TCGA-DA-A95Z-06  
TCGA-D3-A1OA-06  
TCGA-GN-A4U7-06  
TCGA-D3-A8GP-06  
TCGA-RP-A690-06  
TCGA-DA-A95W-06  
TCGA-FS-A1ZY-06  
TCGA-W3-A824-06  
TCGA-ER-A185-06  
TCGA-GN-A262-06  
TCGA-DS-A8GL-06  
TCGA-EE-A3AH-06  
TCGA-EE-A29B-06  
TCGA-EE-A3JI-06  
TCGA-FS-A1ZZ-06  
TCGA-D3-A1QA-07  
TCGA-YG-AA3P-06  
TCGA-W3-AA21-06  
TCGA-D9-A4Z6-06  
TCGA-DA-A1IA-06  
TCGA-FS-A4F0-06  
TCGA-D3-A8GI-06  
TCGA-D9-A6EC-06  
TCGA-D3-A1Q1-06  
TCGA-GN-A8LK-06  
TCGA-EE-A2MM-06  
TCGA-D3-A3C6-06  
TCGA-EE-A2GR-06  
TCGA-FW-A3I3-06  
TCGA-RP-A695-06  
TCGA-D3-A5GL-06  
TCGA-EE-A17Z-06  
TCGA-EE-A2A5-06  
TCGA-FS-A4FB-06  
TCGA-D3-A3MO-06  
TCGA-FS-A1Z3-06  
TCGA-D9-A6EG-06  
TCGA-D3-A3ML-06  
TCGA-ER-A180-06  
TCGA-EE-A3AD-06  
TCGA-ER-A19F-06  
TCGA-FS-A1ZL-06  
TCGA-3N-A9WB-06  
TCGA-FS-A1ZJ-06  
TCGA-FS-A4F5-06  
TCGA-FR-A1U8-06  
TCGA-D9-A1X3-06  
TCGA-EE-A29E-06  
TCGA-EE-A29D-06  
TCGA-EE-A3J7-06  
TCGA-WE-A8ZQ-06  
TCGA-EE-A8JZ-06  
TCGA-FS-A1ZK-06  
TCGA-EE-A20H-06  
TCGA-D3-A8GC-06  
TCGA-WE-A8ZM-06  
TCGA-LH-A9QB-06  
TCGA-FS-A1ZG-06  
TCGA-WE-A8K6-06  
TCGA-EE-A3J8-06  
TCGA-FS-A1ZC-06  
TCGA-EE-A29A-06  
TCGA-D3-A8GV-06  
TCGA-D3-A1Q5-06  
TCGA-FS-A1YW-06  
TCGA-FS-A1ZE-06  
TCGA-EE-A20C-06  
TCGA-ER-A19L-06  
TCGA-ER-A42K-06  
TCGA-EE-A2GO-06

# ITGB1

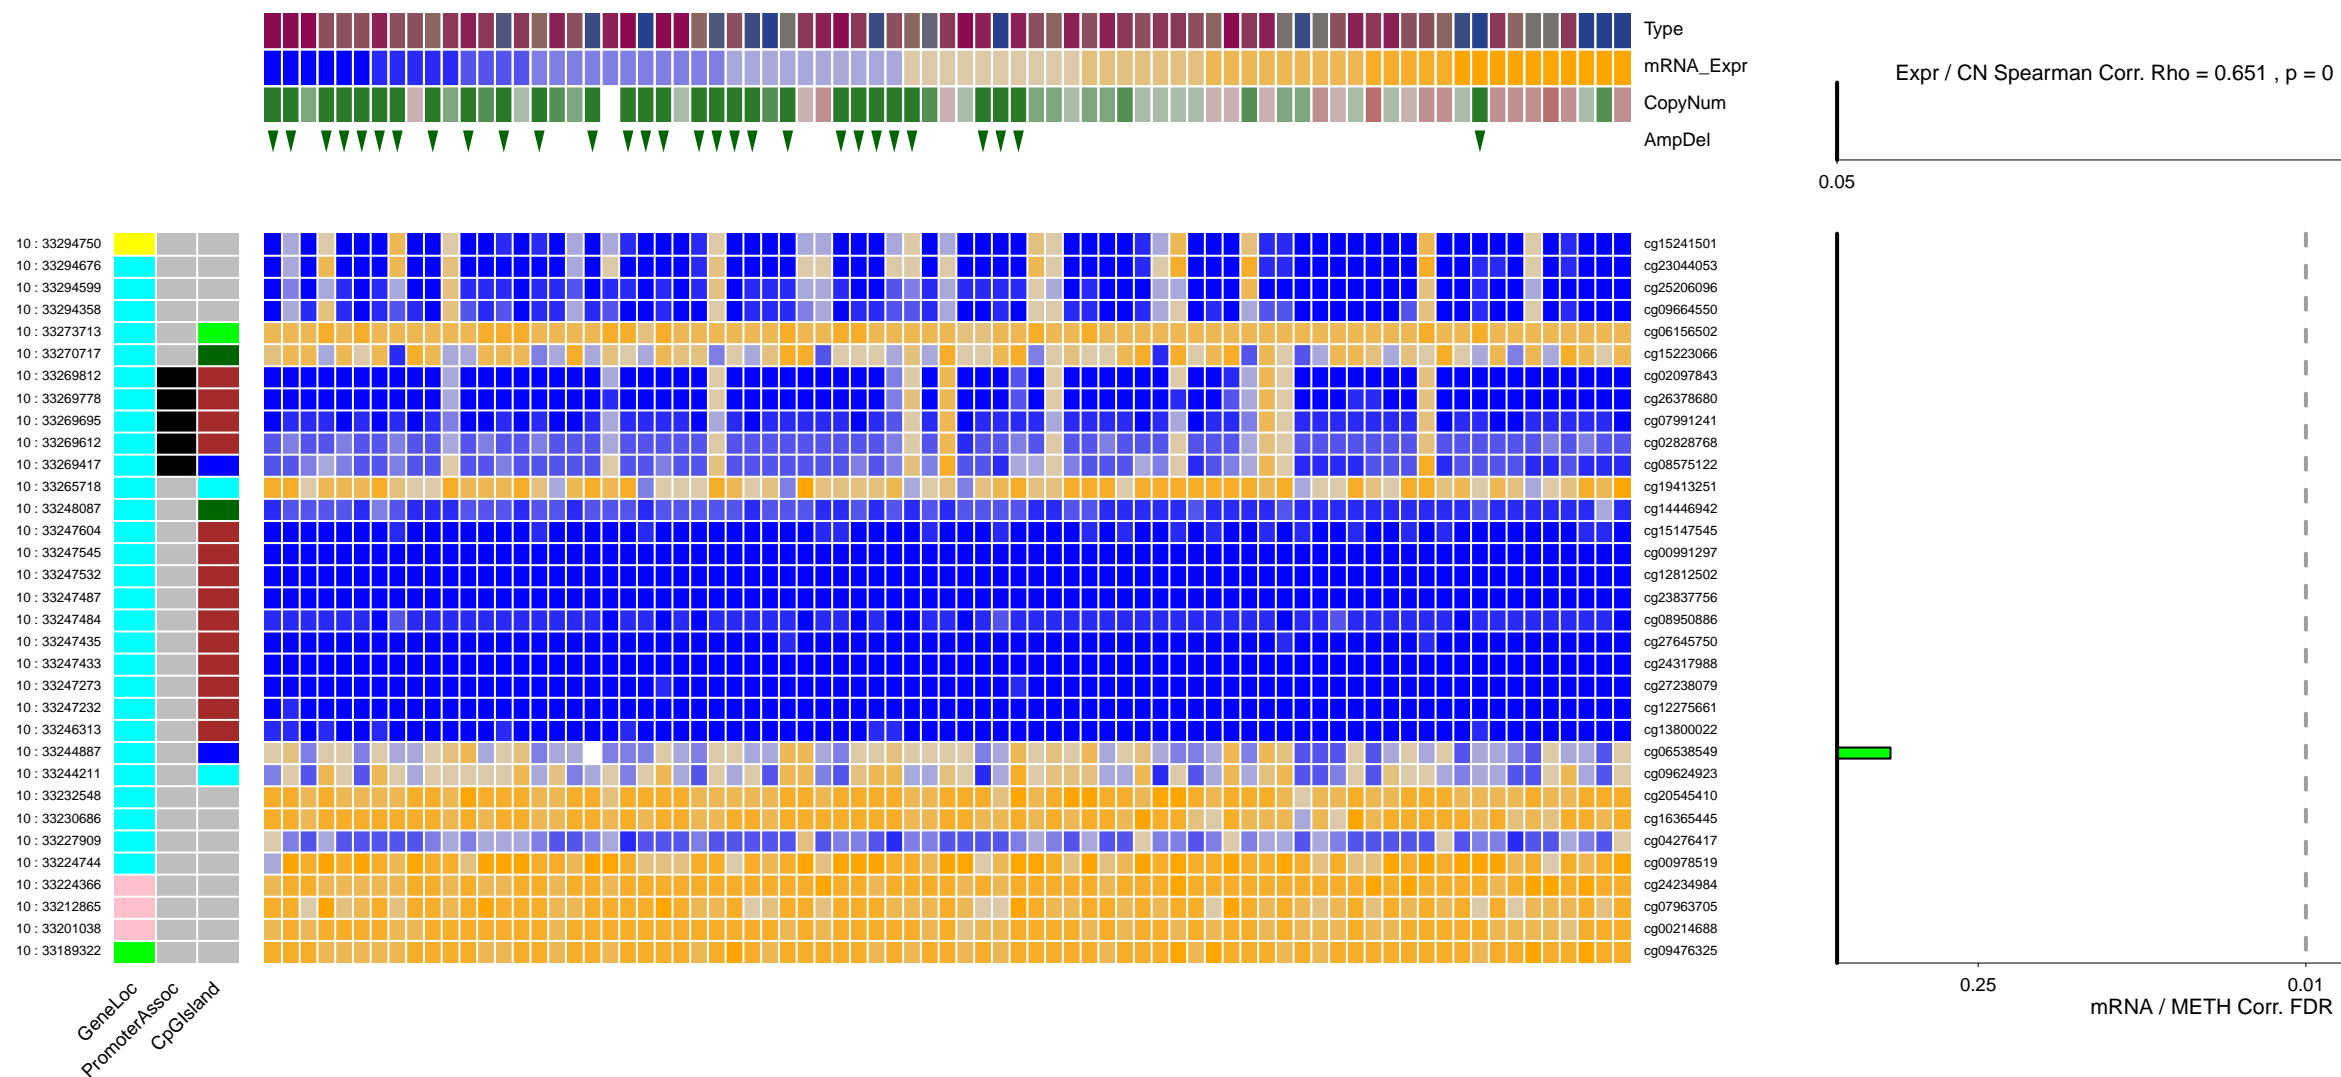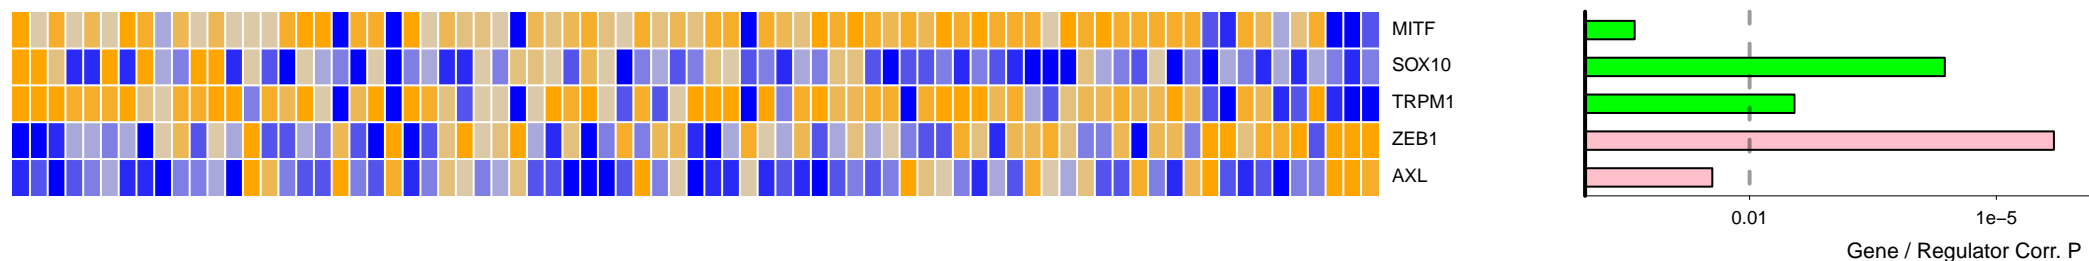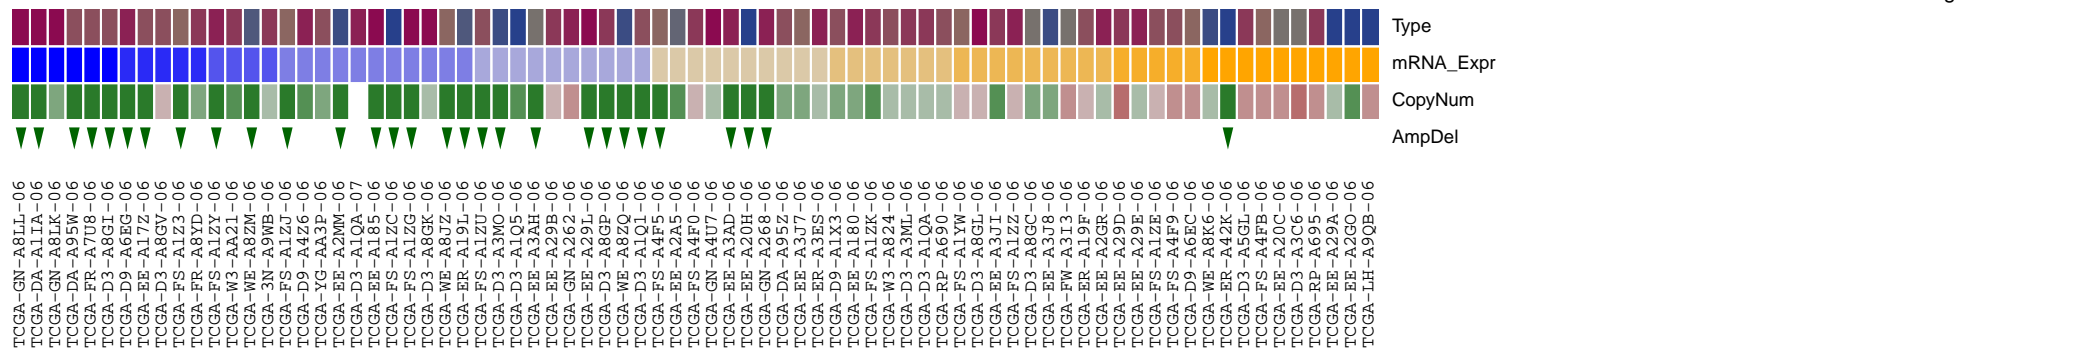

# VCAN

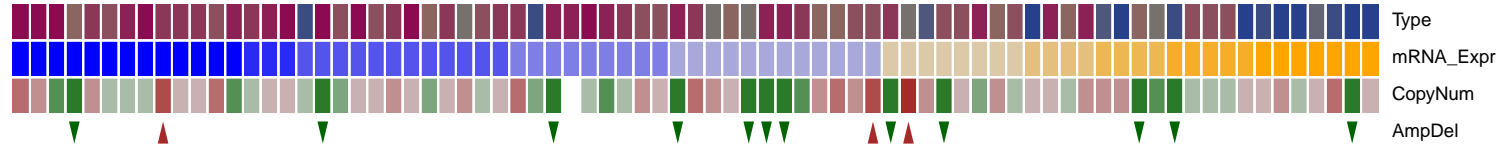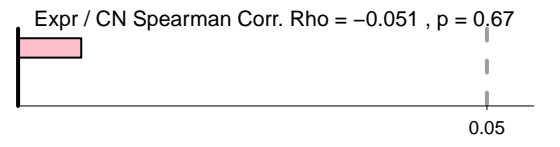

5 : 82766884  
 5 : 82766951  
 5 : 82767280  
 5 : 82767297  
 5 : 82767394  
 5 : 82767450  
 5 : 82767526  
 5 : 82767617  
 5 : 82767908  
 5 : 82767968  
 5 : 82768288  
 5 : 82768488  
 5 : 82768907  
 5 : 82769030  
 5 : 82769097  
 5 : 82769562  
 5 : 82770250  
 5 : 82770440  
 5 : 82770598  
 5 : 82770619  
 5 : 82771274  
 5 : 82771513  
 5 : 82789386  
 5 : 82805379  
 5 : 82845599  
 5 : 82848792  
 5 : 82858676  
 5 : 82864340  
 5 : 82876579

GeneLoc  
 PromoterAssoc  
 CpGIsland

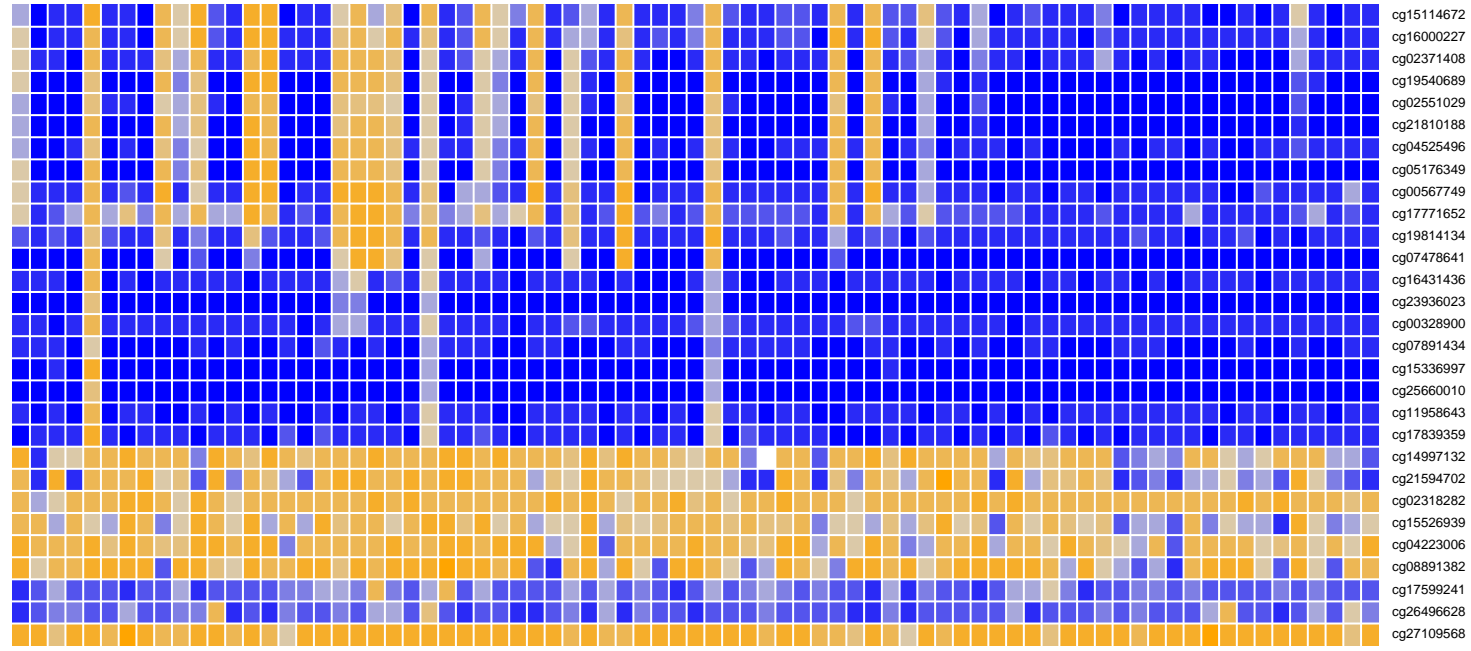

cg15114672  
 cg16000227  
 cg02371408  
 cg19540689  
 cg02551029  
 cg21810188  
 cg04525496  
 cg05176349  
 cg00567749  
 cg17771652  
 cg19814134  
 cg07478641  
 cg16431436  
 cg23936023  
 cg00328900  
 cg07891434  
 cg15336997  
 cg25660010  
 cg11958643  
 cg17839359  
 cg14997132  
 cg21594702  
 cg02318282  
 cg15526939  
 cg04223006  
 cg08891382  
 cg17599241  
 cg26496628  
 cg27109568

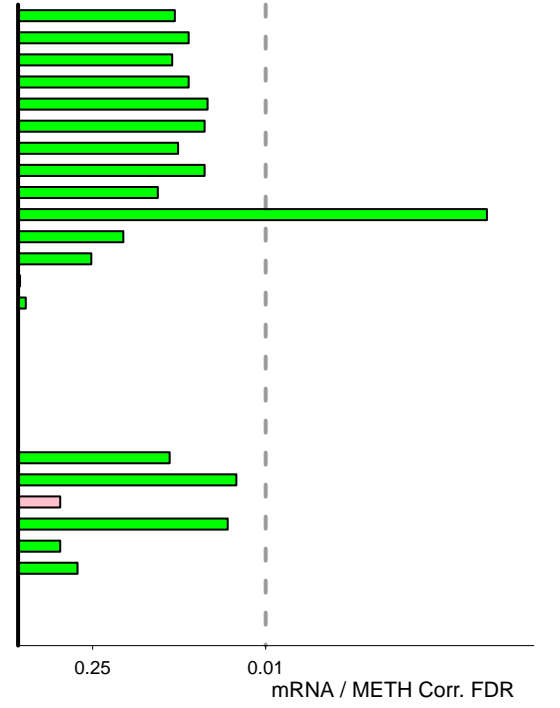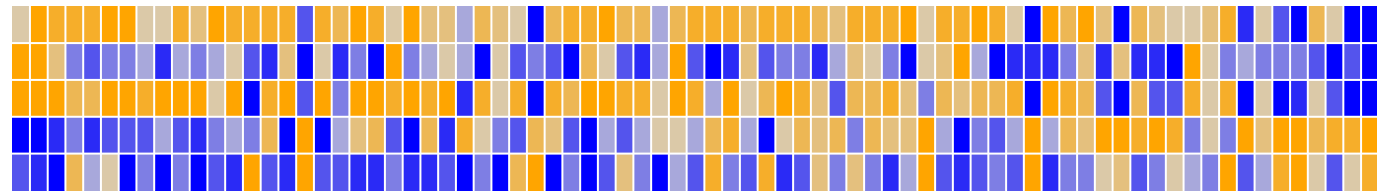

MITF  
 SOX10  
 TRPM1  
 ZEB1  
 AXL

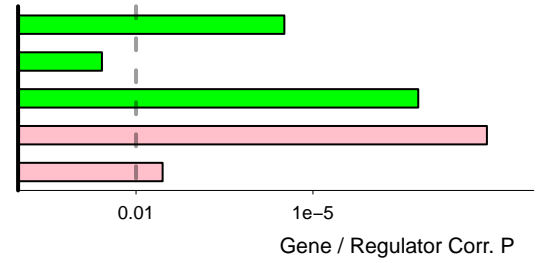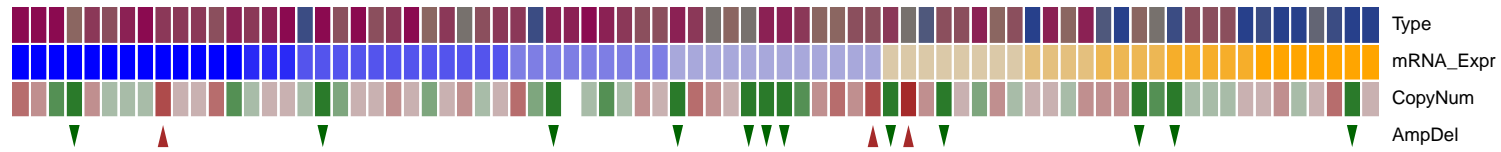

TCGA-DA-A1IA-06  
 TCGA-GN-A8LL-06  
 TCGA-GN-A8LK-06  
 TCGA-D9-A6EC-06  
 TCGA-EE-A3JI-06  
 TCGA-EP-A690-06  
 TCGA-ER-A3ES-06  
 TCGA-D3-A8GK-06  
 TCGA-W3-AA21-06  
 TCGA-EP-A695-06  
 TCGA-FS-A4F0-06  
 TCGA-YG-AA3P-06  
 TCGA-EE-A3AD-06  
 TCGA-D3-A3ML-06  
 TCGA-GN-A1Z7-06  
 TCGA-GN-A4U7-06  
 TCGA-WE-A8K6-06  
 TCGA-EE-A185-06  
 TCGA-DA-A957-06  
 TCGA-D3-A8GL-06  
 TCGA-FS-A4F9-06  
 TCGA-FR-A8YD-06  
 TCGA-EE-A3J7-06  
 TCGA-EE-A29B-06  
 TCGA-EE-A20C-06  
 TCGA-W3-A824-06  
 TCGA-D3-A8GF-06  
 TCGA-ZN-A9WB-06  
 TCGA-EE-A2MN-06  
 TCGA-GN-A262-06  
 TCGA-D3-A1QA-07  
 TCGA-EE-A291-06  
 TCGA-D9-A4Z6-06  
 TCGA-D3-A1QA-06  
 TCGA-FR-A7U8-06  
 TCGA-D3-A8GV-06  
 TCGA-FS-A1ZY-06  
 TCGA-FS-A1ZK-06  
 TCGA-D3-A8GC-06  
 TCGA-FS-A1YW-06  
 TCGA-EE-A3AH-06  
 TCGA-EE-A29F-06  
 TCGA-EE-A268-06  
 TCGA-GN-A29D-06  
 TCGA-WE-A8JZ-06  
 TCGA-FS-A4F5-06  
 TCGA-ER-A19F-06  
 TCGA-FS-A1ZE-06  
 TCGA-D3-A5G1-06  
 TCGA-EP-A3J3-06  
 TCGA-WE-A8ZM-06  
 TCGA-EE-A1X3-06  
 TCGA-EE-A17Z-06  
 TCGA-EE-A2GR-06  
 TCGA-FS-A1ZU-06  
 TCGA-DA-A95W-06  
 TCGA-EE-A2GO-06  
 TCGA-D9-A6EG-06  
 TCGA-FS-A1Z3-06  
 TCGA-EE-A180-06  
 TCGA-ER-A19L-06  
 TCGA-D3-A1Q5-06  
 TCGA-FS-A4FB-06  
 TCGA-EE-A3J8-06  
 TCGA-D3-A8GI-06  
 TCGA-FS-A1ZU-06  
 TCGA-D3-A1Q1-06  
 TCGA-ER-A42K-06  
 TCGA-D3-A3MO-06  
 TCGA-LH-A9OB-06  
 TCGA-EE-A29A-06  
 TCGA-EE-A2A5-06  
 TCGA-WE-A8Z0-06  
 TCGA-EE-A20H-06  
 TCGA-FS-A1ZC-06

# NNMT

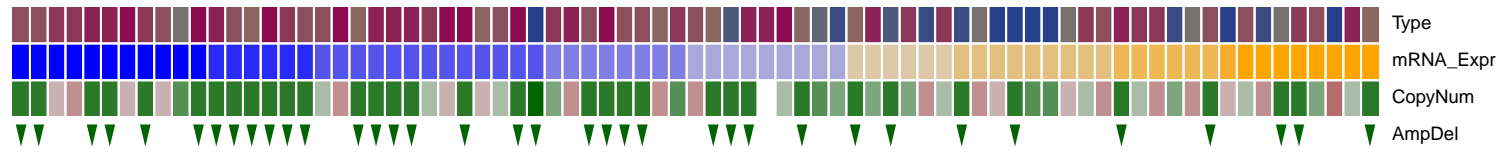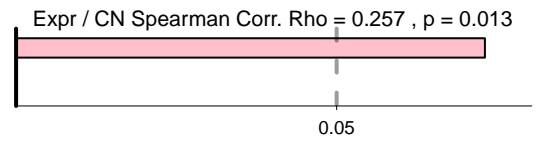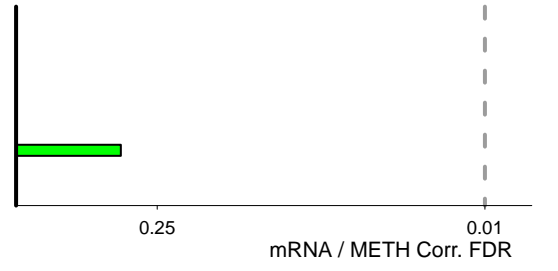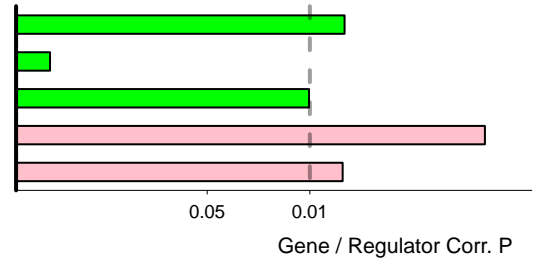

11:114127924  
11:114127960  
11:114128517  
11:114129200  
11:114151397  
11:114156964  
11:114166440  
11:114166446  
11:114166636

GeneLoc  
PromoterAssoc  
CpGIsland

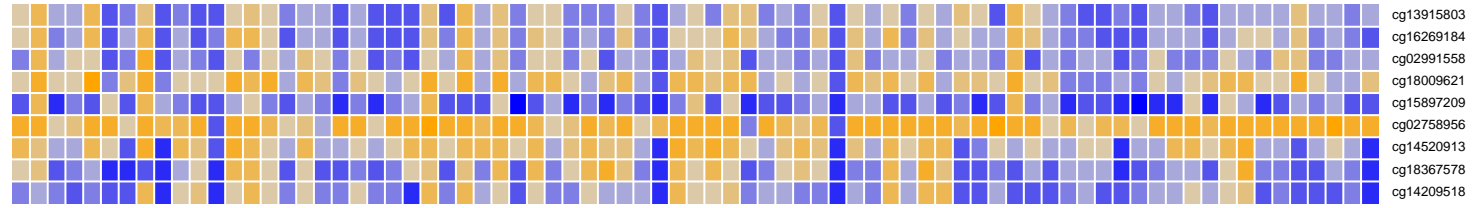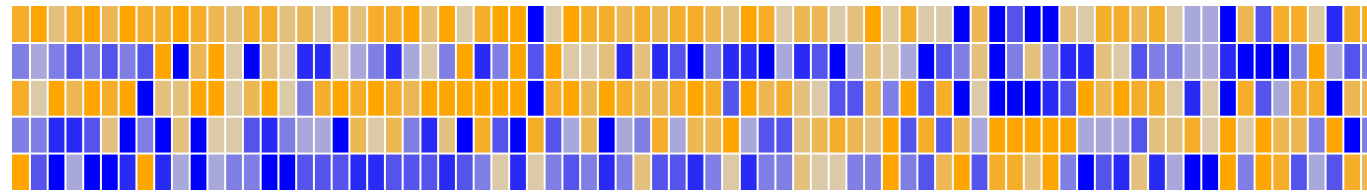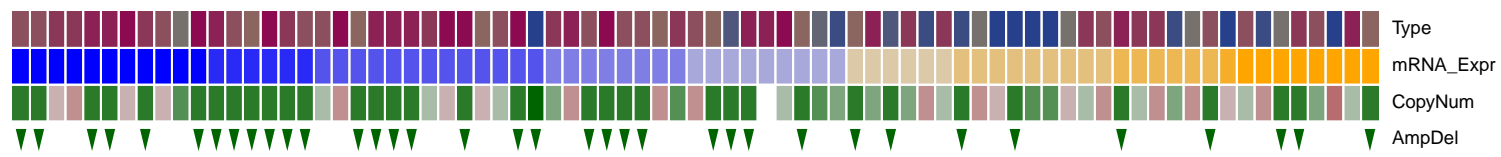

TCGA-D3-A1Q1-06  
TCGA-YG-AA3P-06  
TCGA-FS-A4FO-06  
TCGA-EE-A3JI-06  
TCGA-ER-A3ES-06  
TCGA-GN-A262-06  
TCGA-FS-A1ZG-06  
TCGA-EE-A17Z-06  
TCGA-FW-A3I3-06  
TCGA-EE-A29I-06  
TCGA-FS-A1ZY-06  
TCGA-FS-A1ZU-06  
TCGA-FS-A1ZJ-06  
TCGA-GN-R8LK-06  
TCGA-D3-A8GP-06  
TCGA-DA-R95Z-06  
TCGA-DA-R95W-06  
TCGA-EE-A185-06  
TCGA-EE-A3J7-06  
TCGA-GN-A268-06  
TCGA-FS-A1ZZ-06  
TCGA-EE-A2GR-06  
TCGA-EE-A29B-06  
TCGA-D3-A8GL-06  
TCGA-DA-A1IA-06  
TCGA-FS-A1YW-06  
TCGA-RP-A690-06  
TCGA-GN-A8LL-06  
TCGA-EE-A20H-06  
TCGA-FR-A8YD-06  
TCGA-D9-A4Z6-06  
TCGA-FS-A1ZE-06  
TCGA-FR-A7U8-06  
TCGA-ER-A19F-06  
TCGA-FS-A4FB-06  
TCGA-FS-A1ZK-06  
TCGA-FS-A4F9-06  
TCGA-FS-A1Z3-06  
TCGA-ER-A19L-06  
TCGA-D3-A1QA-07  
TCGA-D3-A8GK-06  
TCGA-WE-A8JZ-06  
TCGA-EE-A2A5-06  
TCGA-EE-A3J8-06  
TCGA-FS-A4FS-06  
TCGA-EE-A180-06  
TCGA-WE-A8ZM-06  
TCGA-EE-R695-06  
TCGA-WE-A8ZQ-06  
TCGA-3N-A9WB-06  
TCGA-EE-A2MM-06  
TCGA-EE-A3AH-06  
TCGA-FS-A1ZC-06  
TCGA-LH-A9QB-06  
TCGA-D3-A1Q5-06  
TCGA-EE-A29A-06  
TCGA-D3-A3C6-06  
TCGA-W3-AA21-06  
TCGA-D9-A1X3-06  
TCGA-EE-A3AD-06  
TCGA-D3-A1QA-06  
TCGA-D3-A5GL-06  
TCGA-EE-A20C-06  
TCGA-D3-A3MO-06  
TCGA-EE-A2GV-06  
TCGA-D3-A8GV-06  
TCGA-EE-A2GO-06  
TCGA-W3-A824-06  
TCGA-WE-A8K6-06  
TCGA-D3-A8GC-06  
TCGA-EE-A29D-06  
TCGA-D3-A8GI-06  
TCGA-ER-A42K-06  
TCGA-EE-A29F-06  
TCGA-D9-A6EC-06



# TNFAIP2

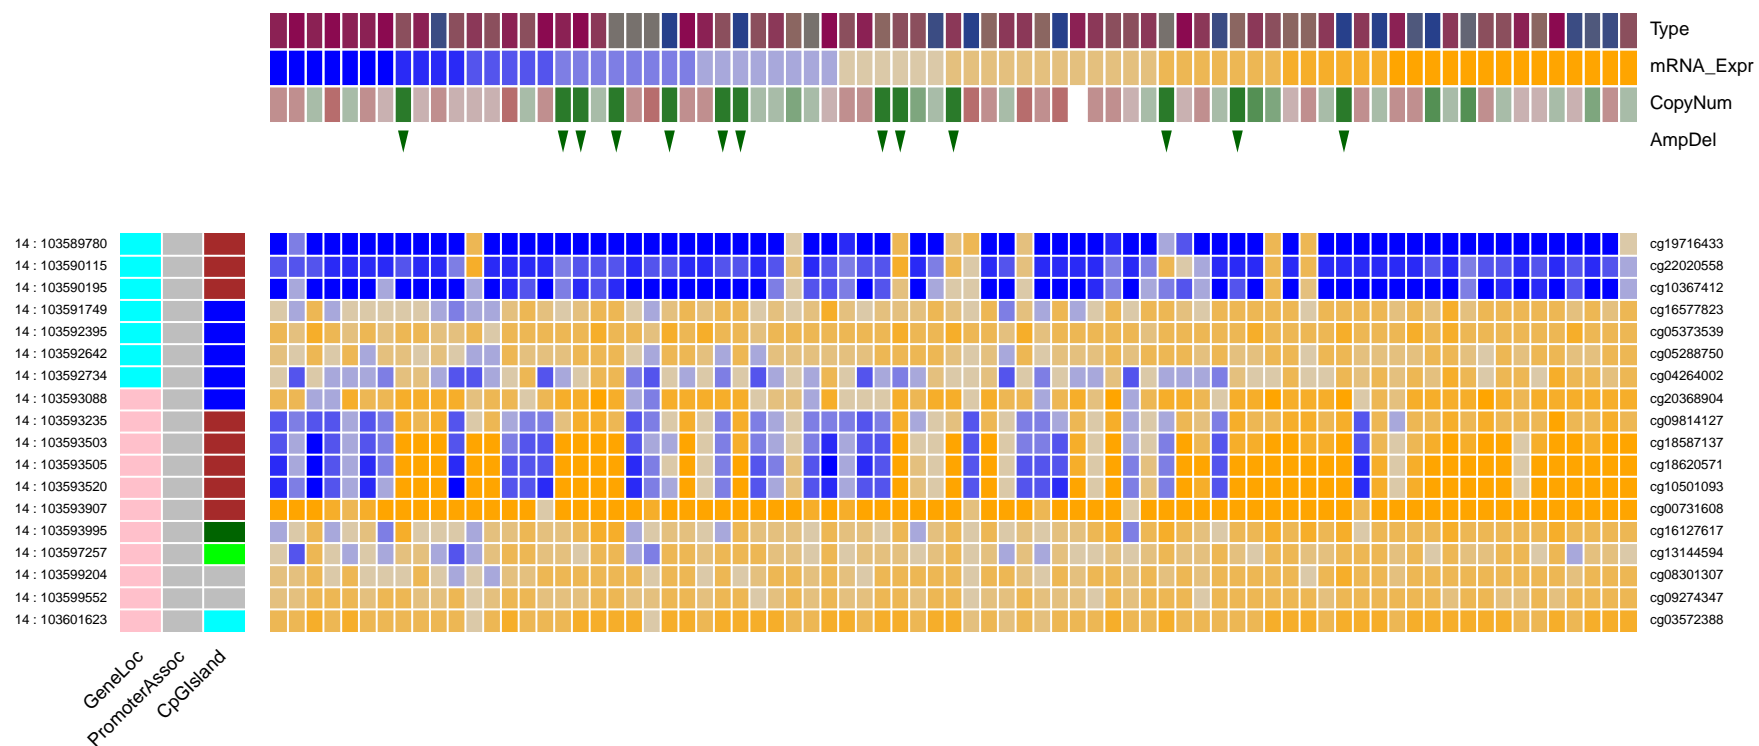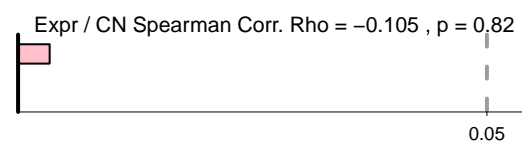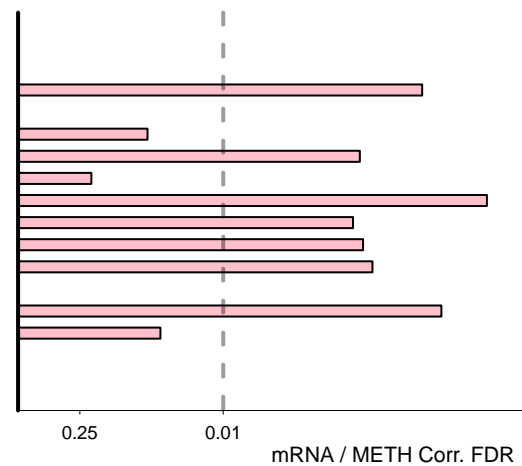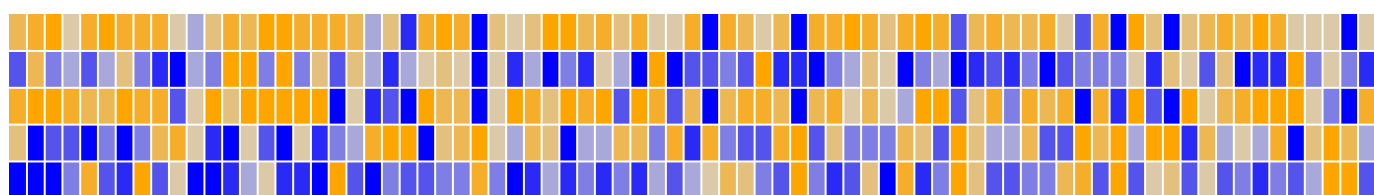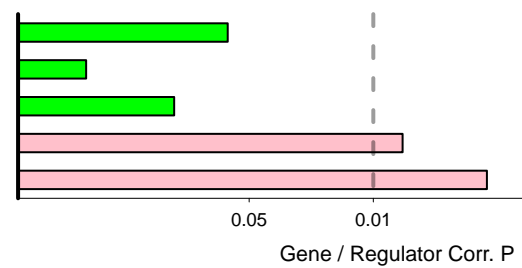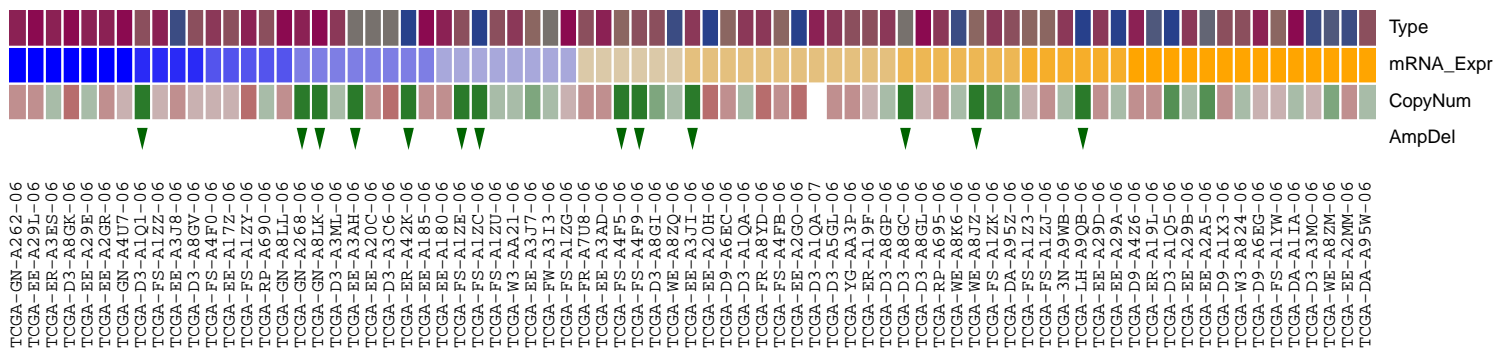

# ITGA5

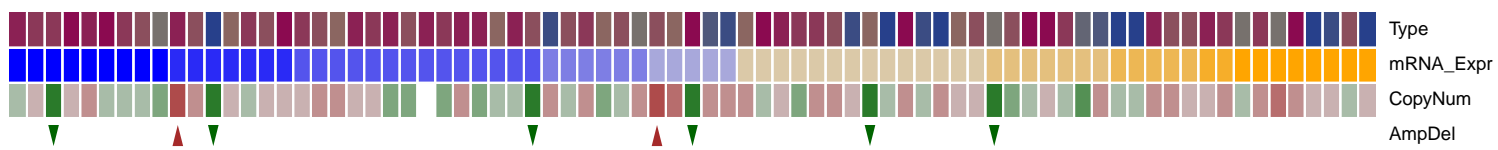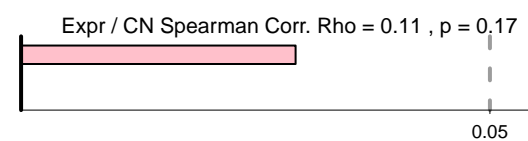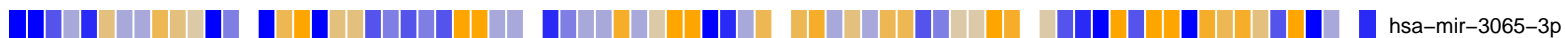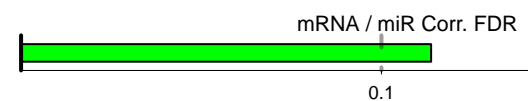

12 : 54814557  
 12 : 54813531  
 12 : 54813361  
 12 : 54813155  
 12 : 54813119  
 12 : 54813046  
 12 : 54812949  
 12 : 54812824  
 12 : 54812606  
 12 : 54812085  
 12 : 54812000  
 12 : 54811762  
 12 : 54806218  
 12 : 54805345

GeneLoc  
 PromoterAssoc  
 CpIsland

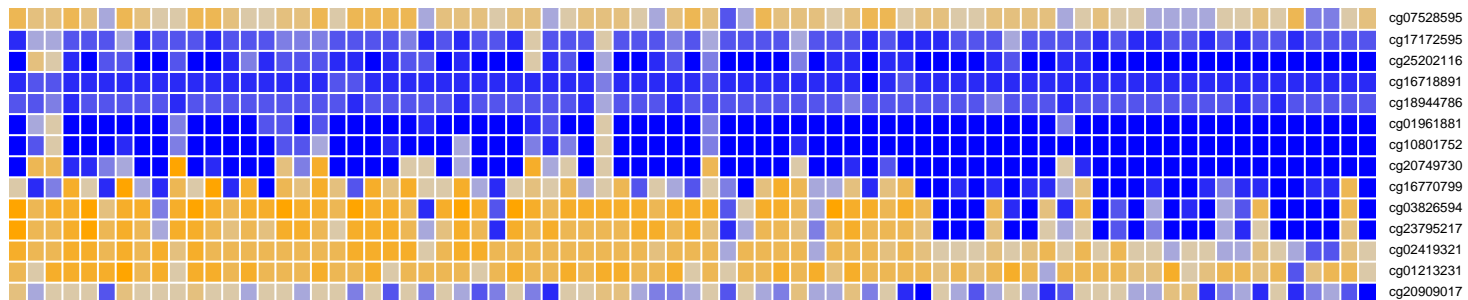

cg07528595  
 cg17172595  
 cg25202116  
 cg16718891  
 cg18944786  
 cg01961881  
 cg10801752  
 cg20749730  
 cg16770799  
 cg03826594  
 cg23795217  
 cg02419321  
 cg01213231  
 cg20909017

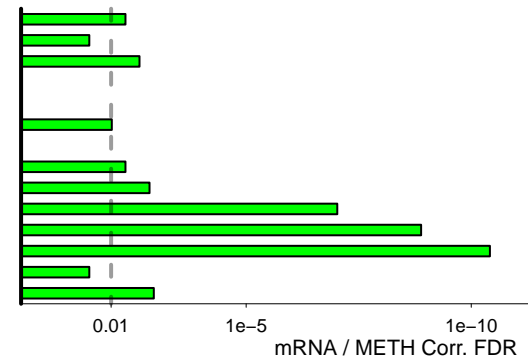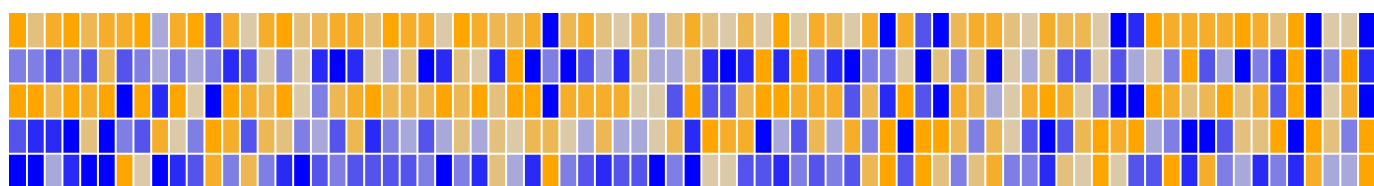

MITF  
 SOX10  
 TRPM1  
 ZEB1  
 AXL

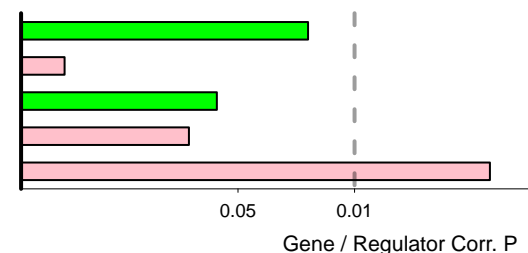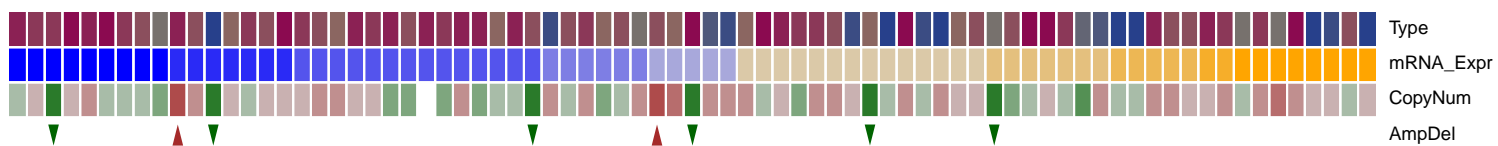

TCGA-ER-A3ES-06  
 TCGA-FS-A4F0-06  
 TCGA-EE-A3JI-06  
 TCGA-FS-A1ZG-06  
 TCGA-GN-A262-06  
 TCGA-EE-A29L-06  
 TCGA-D3-A3ML-06  
 TCGA-RP-A690-06  
 TCGA-EE-A20C-06  
 TCGA-GN-A268-06  
 TCGA-YG-AA3P-06  
 TCGA-LH-A9QB-06  
 TCGA-FS-A1YW-06  
 TCGA-3N-A9WB-06  
 TCGA-FS-A1ZE-06  
 TCGA-D3-A8GL-06  
 TCGA-D3-A8GP-06  
 TCGA-DA-A9EZ-06  
 TCGA-FS-A1ZJ-06  
 TCGA-FS-A1ZZ-06  
 TCGA-EE-A29B-06  
 TCGA-EE-A2GR-06  
 TCGA-D9-A1X3-06  
 TCGA-D3-A1QA-07  
 TCGA-W3-AA21-06  
 TCGA-EE-A180-06  
 TCGA-EE-A3AD-06  
 TCGA-WE-A8JZ-06  
 TCGA-FS-A1ZY-06  
 TCGA-FS-A4F9-06  
 TCGA-EE-A2MM-06  
 TCGA-W3-A824-06  
 TCGA-FS-A1ZK-06  
 TCGA-EE-A3J7-06  
 TCGA-DA-A95W-06  
 TCGA-EE-A3AH-06  
 TCGA-D3-A8GV-06  
 TCGA-FS-A4F5-06  
 TCGA-GN-A8LK-06  
 TCGA-ER-A19L-06  
 TCGA-EE-A3J8-06  
 TCGA-FS-A4FB-06  
 TCGA-DA-A1IA-06  
 TCGA-D9-A6EG-06  
 TCGA-FR-A8YD-06  
 TCGA-EE-A29D-06  
 TCGA-FR-A7U8-06  
 TCGA-WE-A8ZO-06  
 TCGA-D9-A6EC-06  
 TCGA-EE-A29A-06  
 TCGA-EE-A185-06  
 TCGA-WE-A8KG-06  
 TCGA-FS-A1Q5-06  
 TCGA-ER-A19F-06  
 TCGA-D3-A6GC-06  
 TCGA-FS-A1ZU-06  
 TCGA-D3-A8GK-06  
 TCGA-GN-A4U7-06  
 TCGA-D3-A1QA-06  
 TCGA-EE-A2A5-06  
 TCGA-WE-A8ZM-06  
 TCGA-EE-A20H-06  
 TCGA-ER-A42K-06  
 TCGA-D9-A4Z6-06  
 TCGA-D3-A1Q1-06  
 TCGA-EE-A17Z-06  
 TCGA-EE-A29E-06  
 TCGA-RP-A695-06  
 TCGA-FW-A3I3-06  
 TCGA-D3-A5GL-06  
 TCGA-D3-A3C6-06  
 TCGA-GN-A8LL-06  
 TCGA-FS-A1ZC-06  
 TCGA-D3-A3M0-06  
 TCGA-D3-A8GI-06  
 TCGA-EE-A2GO-06

# FSCN1

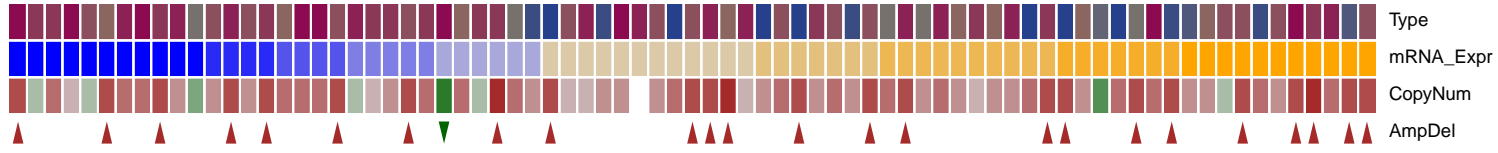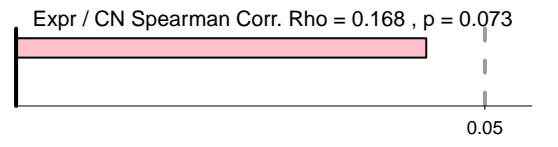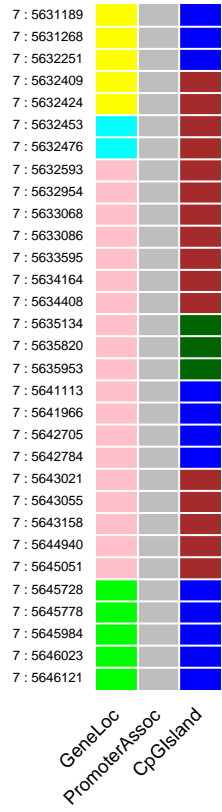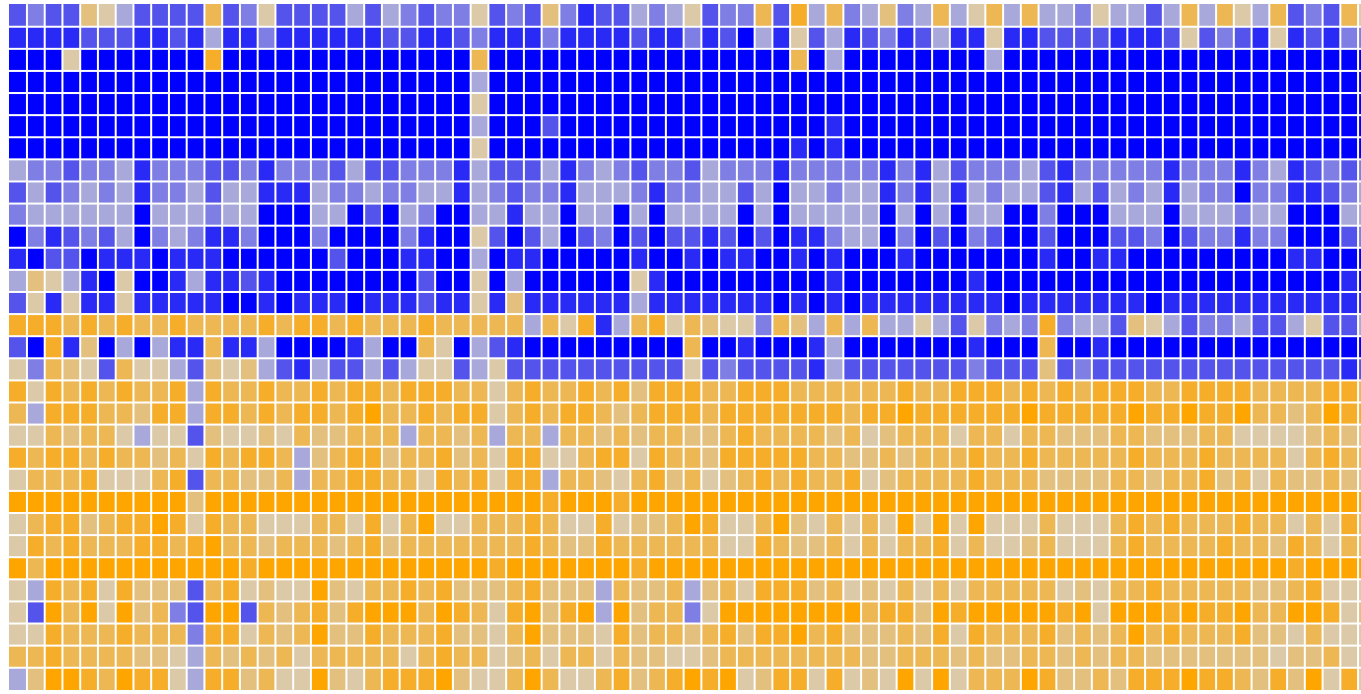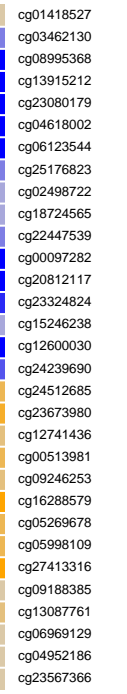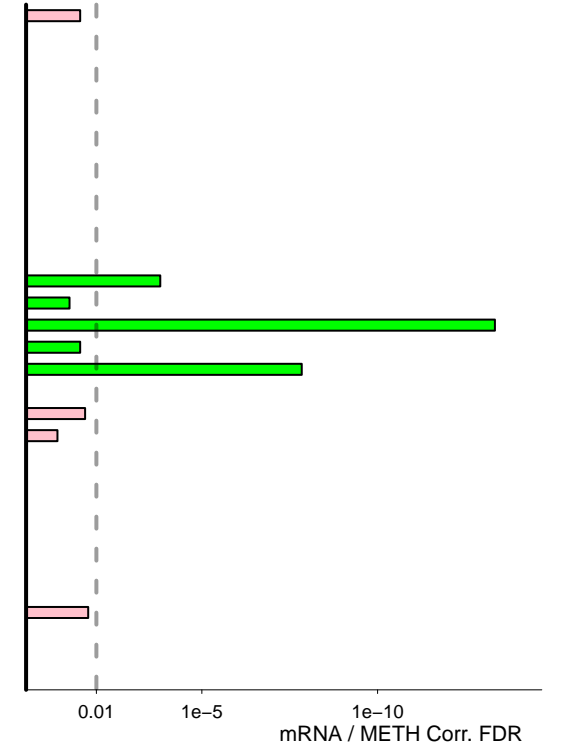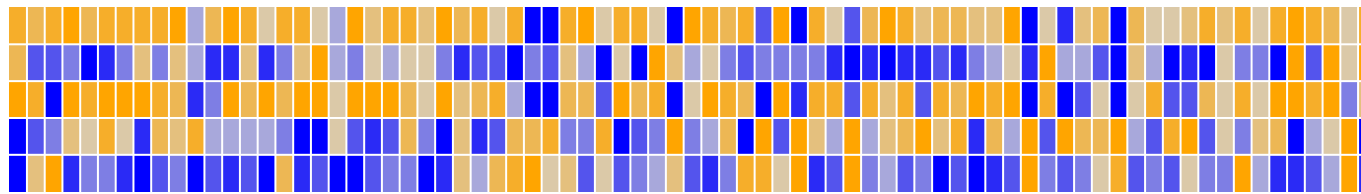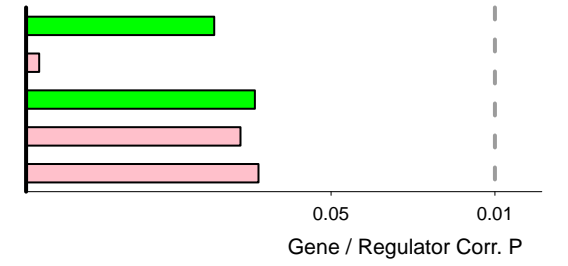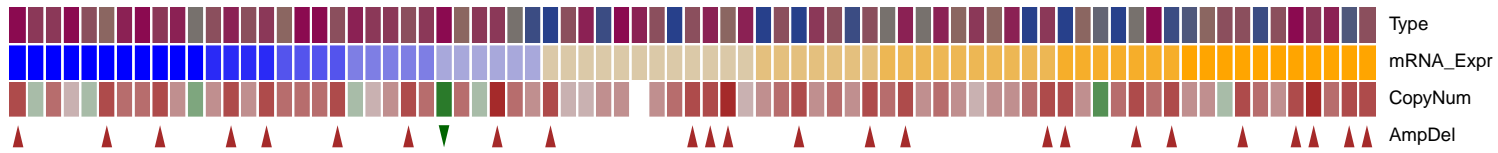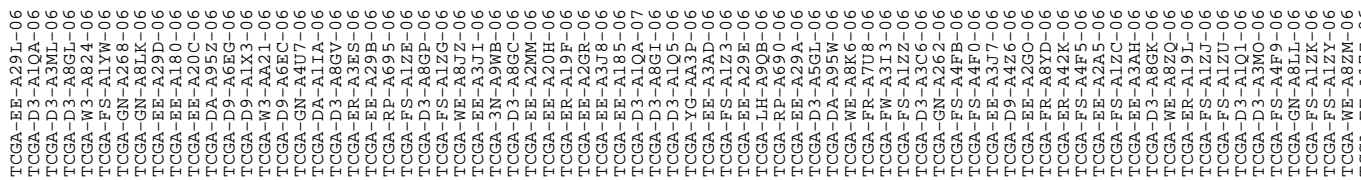

# EDIL3

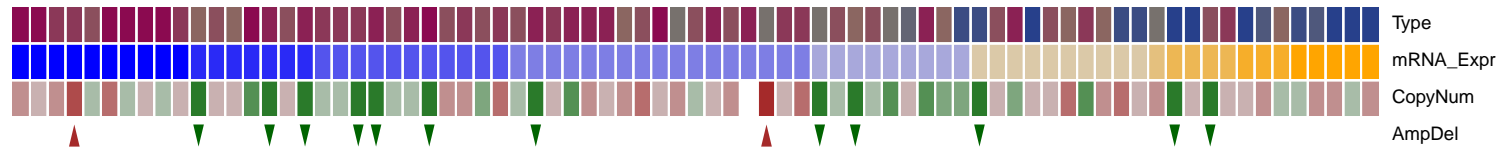

5 : 83681563  
 5 : 83680968  
 5 : 83680719  
 5 : 83680717  
 5 : 83680690  
 5 : 83680326  
 5 : 83680253  
 5 : 83680066  
 5 : 83679941  
 5 : 83679643  
 5 : 83679364  
 5 : 83679211  
 5 : 83679123  
 5 : 83679005  
 5 : 83678903  
 5 : 83678796  
 5 : 83678480  
 5 : 83678235  
 5 : 83678141  
 5 : 83677872  
 5 : 83639995  
 5 : 83588224  
 5 : 83585467  
 5 : 83409549  
 5 : 83289498  
 5 : 83253023

GeneLoc  
 PromoterAssoc  
 CpGIsland

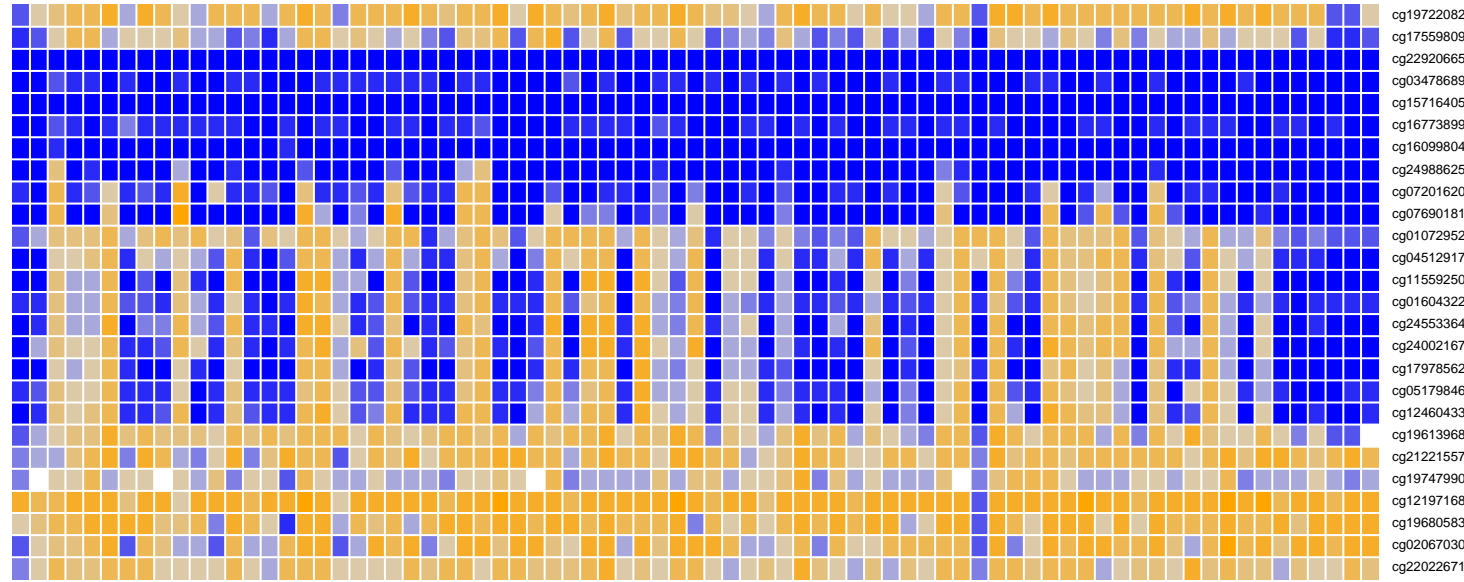

Type  
 mRNA\_Expr  
 CopyNum  
 AmpDel

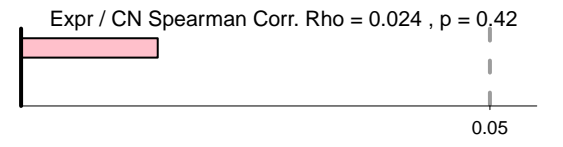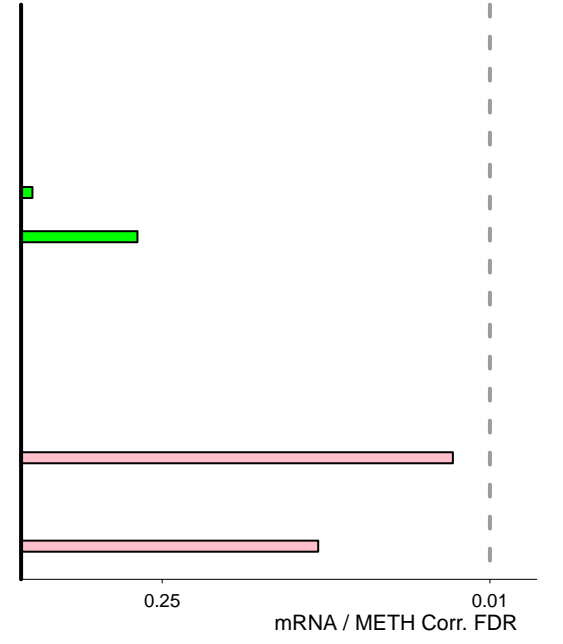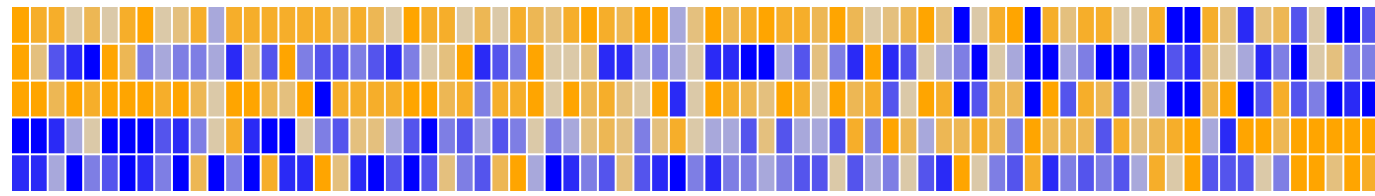

MITF  
 SOX10  
 TRPM1  
 ZEB1  
 AXL

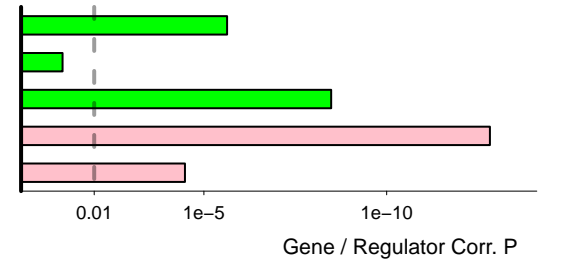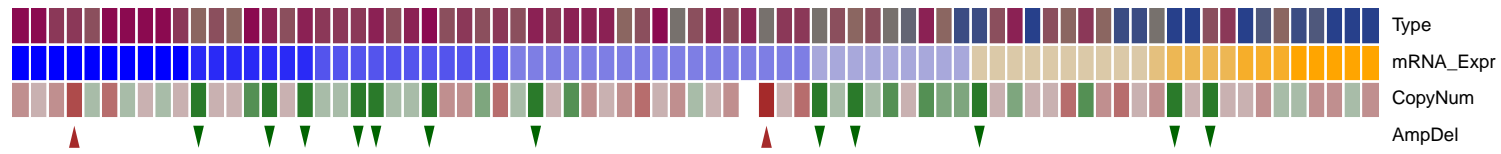

TCGA-GN-A8LL-06  
 TCGA-GN-A4U7-06  
 TCGA-EE-A3JI-06  
 TCGA-W3-AA21-06  
 TCGA-DA-A1IA-06  
 TCGA-EE-A29L-06  
 TCGA-EE-A1ZG-06  
 TCGA-D3-A8GK-06  
 TCGA-EE-A4FO-06  
 TCGA-D3-A6EC-06  
 TCGA-D3-A8GV-06  
 TCGA-PS-A1YM-06  
 TCGA-GN-A8LK-06  
 TCGA-EE-A29F-06  
 TCGA-EE-A17Z-06  
 TCGA-GN-A2Z6-06  
 TCGA-D3-A3ML-06  
 TCGA-D3-A1QA-06  
 TCGA-D3-A5GL-06  
 TCGA-GN-A26Z-06  
 TCGA-DA-A95W-06  
 TCGA-EE-A3ES-06  
 TCGA-EE-A185-06  
 TCGA-EE-A19F-06  
 TCGA-FR-A8YD-06  
 TCGA-DA-A95Z-06  
 TCGA-3N-A9WB-06  
 TCGA-D3-A1Q1-06  
 TCGA-PS-A1ZY-06  
 TCGA-D3-A8GF-06  
 TCGA-EE-A3AD-06  
 TCGA-EE-A180-06  
 TCGA-PS-A1ZZ-06  
 TCGA-WE-A8JZ-06  
 TCGA-YG-AA3P-06  
 TCGA-D3-A8GL-06  
 TCGA-EE-A20C-06  
 TCGA-PS-A1ZU-06  
 TCGA-D9-A6EG-06  
 TCGA-FR-A7U8-06  
 TCGA-D3-A1QA-07  
 TCGA-FW-A3I3-06  
 TCGA-RP-A695-06  
 TCGA-PS-A1ZK-06  
 TCGA-EE-A3AH-06  
 TCGA-EE-A690-06  
 TCGA-PS-A4FB-06  
 TCGA-D3-A8GI-06  
 TCGA-D3-A3C6-06  
 TCGA-EE-A2A5-06  
 TCGA-EE-A425-06  
 TCGA-D9-A3J7-06  
 TCGA-EE-A3J8-06  
 TCGA-EE-A2MM-06  
 TCGA-EE-A3J8-06  
 TCGA-PS-A1ZE-06  
 TCGA-EE-A2GR-06  
 TCGA-PS-A1ZC-06  
 TCGA-PS-A4F9-06  
 TCGA-PS-A4F5-06  
 TCGA-EE-A29D-06  
 TCGA-PS-A1ZJ-06  
 TCGA-WE-A8ZQ-06  
 TCGA-D3-A3MO-06  
 TCGA-EE-A20H-06  
 TCGA-EE-A2GO-06  
 TCGA-D9-A1X3-06  
 TCGA-EE-A29B-06  
 TCGA-EE-A42K-06  
 TCGA-EE-A19L-06  
 TCGA-PS-A1Z3-06  
 TCGA-WE-A8K6-06  
 TCGA-WE-A8ZM-06  
 TCGA-D3-A1Q5-06  
 TCGA-EE-A29A-06  
 TCGA-LH-A9QB-06

Type  
 mRNA\_Expr  
 CopyNum  
 AmpDel

# VGLL3

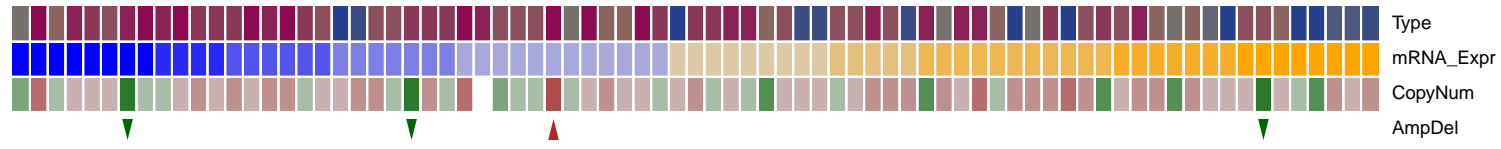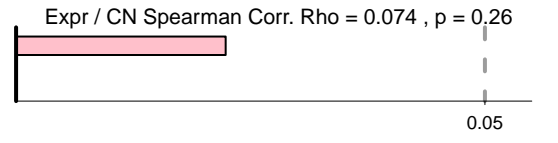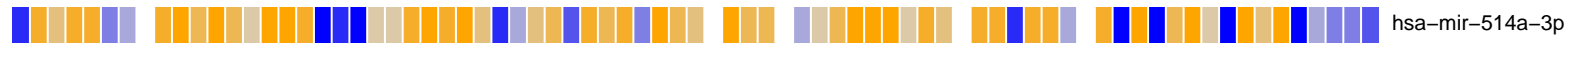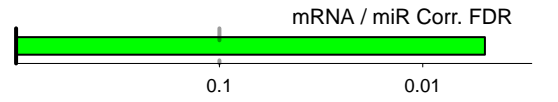

- 3 : 87040739
- 3 : 87040709
- 3 : 87040640
- 3 : 87040452
- 3 : 87040426
- 3 : 87040308
- 3 : 87040286
- 3 : 87040269
- 3 : 87040082
- 3 : 87039900
- 3 : 87039882
- 3 : 87039687
- 3 : 87039620
- 3 : 87039536
- 3 : 87039150
- 3 : 87038972
- 3 : 87036080
- 3 : 87027629
- 3 : 87018446
- 3 : 87016674
- 3 : 86998418

GeneLoc  
PromoterAssoc  
CpGIsland

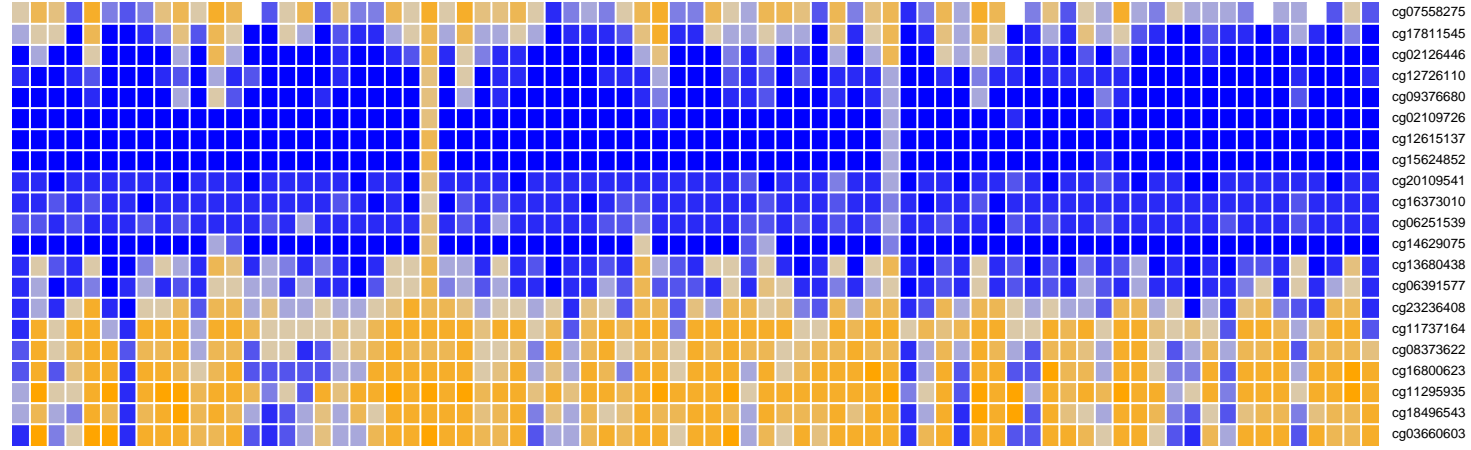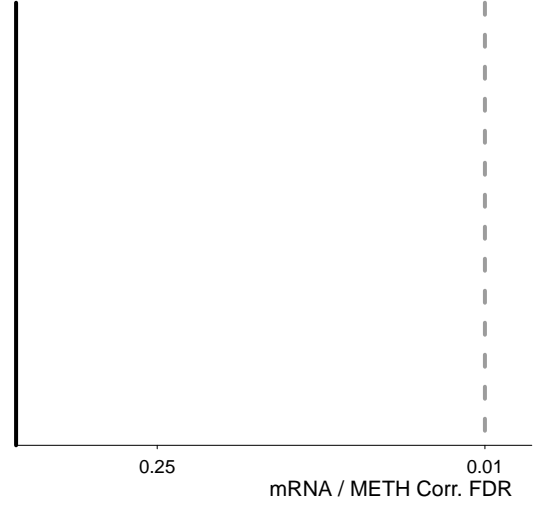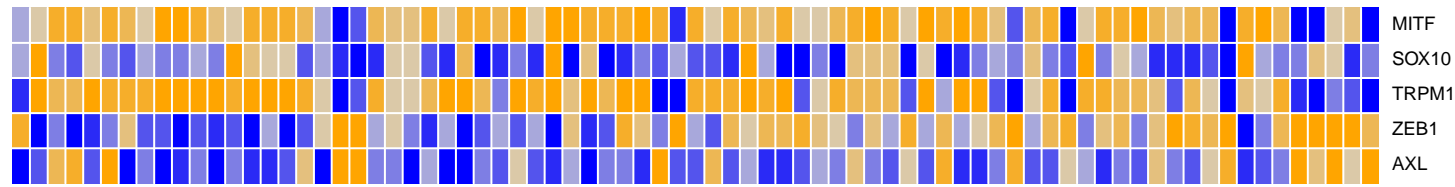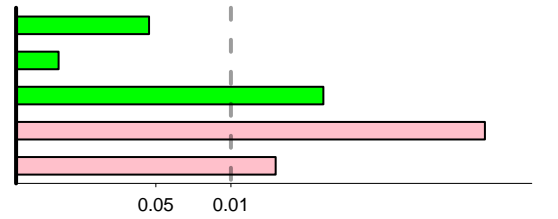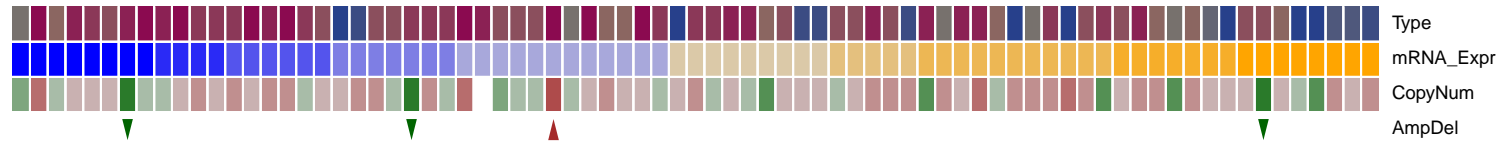

- TCGA-EE-A20C-06
- TCGA-DA-A11A-06
- TCGA-D9-A6EC-06
- TCGA-EE-A29E-06
- TCGA-EE-A29B-06
- TCGA-D3-A1Q1-06
- TCGA-GN-A262-06
- TCGA-D3-A8GK-06
- TCGA-ER-A3ES-06
- TCGA-FS-A1ZG-06
- TCGA-RP-A695-06
- TCGA-FS-A4F0-06
- TCGA-FR-A8YD-06
- TCGA-GN-A4U7-06
- TCGA-EE-A38D-06
- TCGA-EE-A185-06
- TCGA-D3-A1QA-06
- TCGA-D3-A8GV-06
- TCGA-EE-A2G0-06
- TCGA-WE-A8K6-06
- TCGA-FR-A7U8-06
- TCGA-FS-A1ZU-06
- TCGA-D3-A8GF-06
- TCGA-EE-A3U1-06
- TCGA-W3-AA21-06
- TCGA-EE-A29L-06
- TCGA-D3-A1QA-07
- TCGA-DA-A952-06
- TCGA-RP-A690-06
- TCGA-DA-A95W-06
- TCGA-GN-A8LL-06
- TCGA-FW-A313-06
- TCGA-GN-A8LK-06
- TCGA-FS-A1ZJ-06
- TCGA-FS-A1YW-06
- TCGA-D3-A8GL-06
- TCGA-D3-A3ML-06
- TCGA-ER-A42K-06
- TCGA-FS-A1ZK-06
- TCGA-3N-A9WB-06
- TCGA-FS-A1Z2-06
- TCGA-EE-A3J7-06
- TCGA-FS-A4F9-06
- TCGA-WE-A8Z0-06
- TCGA-D3-A3M0-06
- TCGA-W3-A824-06
- TCGA-FR-A19F-06
- TCGA-EE-A180-06
- TCGA-D9-A1X3-06
- TCGA-EE-A1J8-06
- TCGA-D9-A4Z6-06
- TCGA-D3-A8GC-06
- TCGA-D9-A6EG-06
- TCGA-GN-A268-06
- TCGA-FS-A4FS-06
- TCGA-LH-A9QB-06
- TCGA-EE-A3AH-06
- TCGA-EE-A20H-06
- TCGA-EE-A20H-06
- TCGA-D3-A5GL-06
- TCGA-FS-A1ZE-06
- TCGA-EE-A2GR-06
- TCGA-WE-A8JZ-06
- TCGA-D3-A3C6-06
- TCGA-FS-A4FB-06
- TCGA-EE-A2A5-06
- TCGA-FS-A1ZC-06
- TCGA-EE-A17Z-06
- TCGA-YG-AA3P-06
- TCGA-FS-A1Z3-06
- TCGA-EE-A29A-06
- TCGA-D3-A1O5-06
- TCGA-WE-A8ZM-06
- TCGA-ER-A19L-06
- TCGA-EE-A2MM-06

# DDAH1

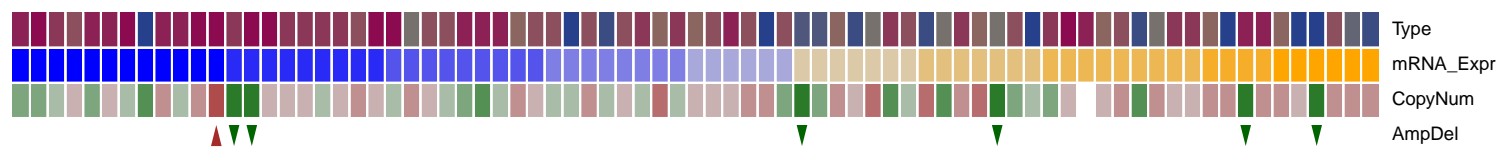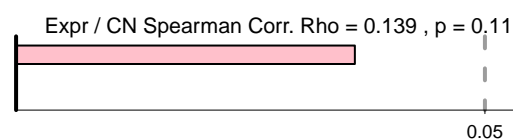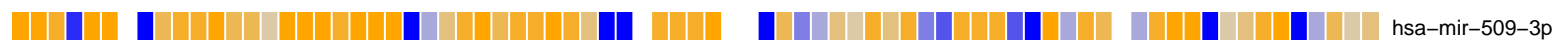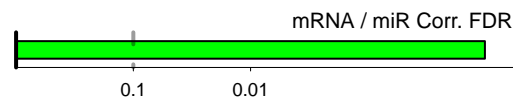

- 1 : 86045841
- 1 : 86045527
- 1 : 86045474
- 1 : 86045347
- 1 : 86044230
- 1 : 86044176
- 1 : 86044103
- 1 : 86043834
- 1 : 86043795
- 1 : 86042934
- 1 : 86042732
- 1 : 86042674
- 1 : 86042667
- 1 : 86042661
- 1 : 86042230
- 1 : 86042149
- 1 : 86040228
- 1 : 86011409
- 1 : 85992165
- 1 : 85968569
- 1 : 85960789
- 1 : 85931226
- 1 : 85931167
- 1 : 85931161
- 1 : 85931116
- 1 : 85931083
- 1 : 85931072
- 1 : 85930865
- 1 : 85930813
- 1 : 85930809
- 1 : 85930476
- 1 : 85930306
- 1 : 85930151
- 1 : 85929949
- 1 : 85929755
- 1 : 85913350
- 1 : 85902974
- 1 : 85883665
- 1 : 85877412
- 1 : 85872804
- 1 : 85834261
- 1 : 85832650
- 1 : 85809159
- 1 : 85796055

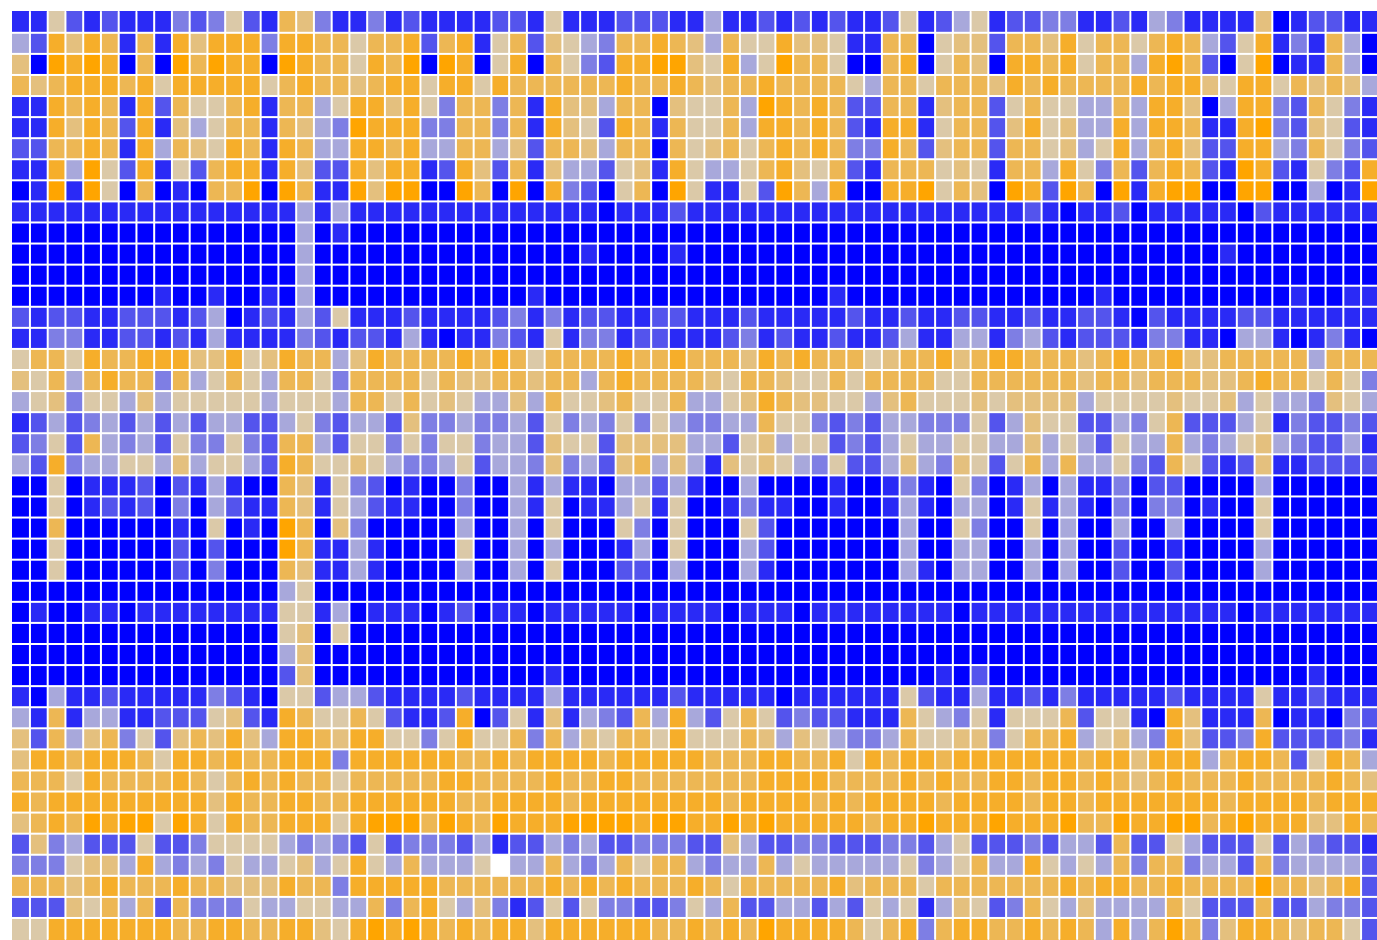

- cg07350718
- cg07165167
- cg12278705
- cg13871826
- cg17108141
- cg10593400
- cg24724587
- cg00183684
- cg20431191
- cg23080733
- cg16399910
- cg06983715
- cg06363275
- cg12218697
- cg11737676
- cg14985076
- cg24662614
- cg06033321
- cg05140232
- cg20169015
- cg13547559
- cg14322224
- cg05004108
- cg15396570
- cg11648968
- cg25756066
- cg08946575
- cg05654711
- cg00156072
- cg02572729
- cg25277534
- cg24448326
- cg21589280
- cg16253641
- cg11243029
- cg11420771
- cg17276103
- cg00308936
- cg11341440
- cg15991082
- cg24515368
- cg03938477
- cg01550348
- cg08654262

GeneLoc  
PromoterAssoc  
CpGIsland

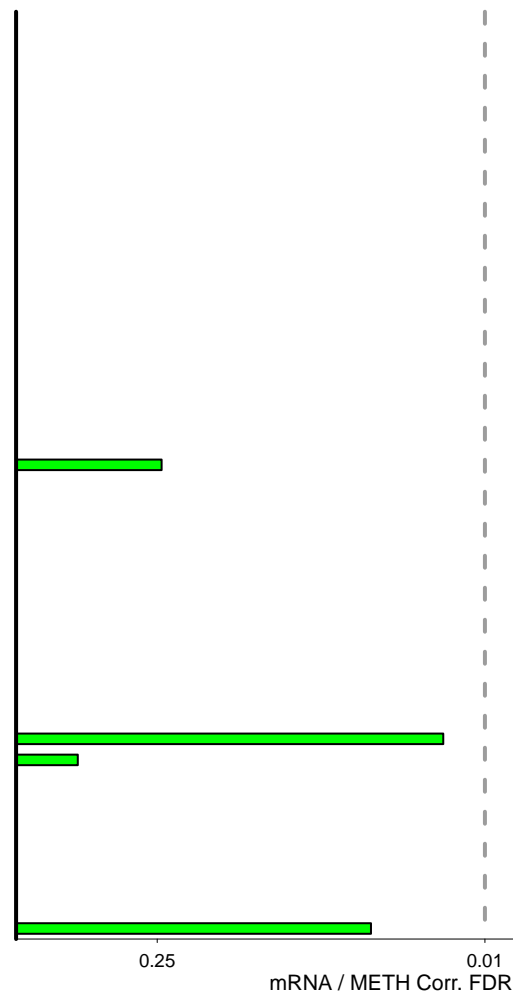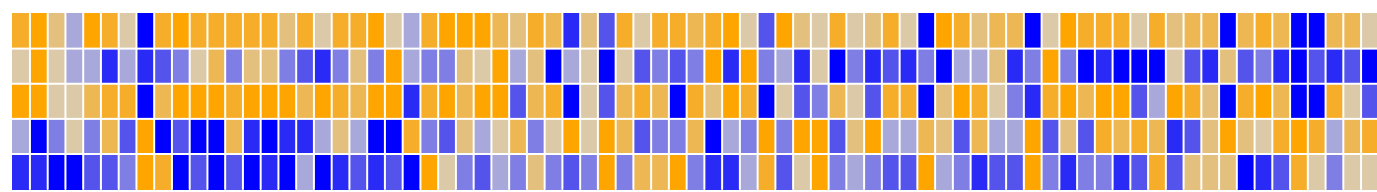

- MITF
- SOX10
- TRPM1
- ZEB1
- AXL

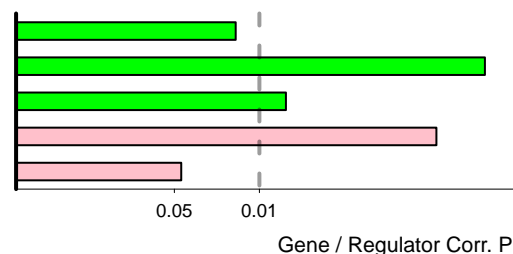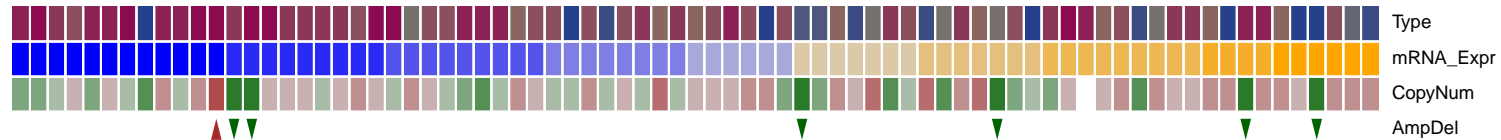

- TCGA-EE-A3AD-06
- TCGA-GN-A8LL-06
- TCGA-D3-A8GF-06
- TCGA-D3-A8GV-06
- TCGA-EE-A2GR-06
- TCGA-FS-A1ZZ-06
- TCGA-D3-A8GK-06
- TCGA-EE-A2GO-06
- TCGA-ER-A29B-06
- TCGA-ER-A3ES-06
- TCGA-EE-A185-06
- TCGA-EE-A29I-06
- TCGA-EE-A29D-06
- TCGA-GN-A8LK-06
- TCGA-GN-A4U7-06
- TCGA-FS-A4F0-06
- TCGA-EE-A3JI-06
- TCGA-EE-A3JI-06
- TCGA-W3-A821-06
- TCGA-D3-A5GL-06
- TCGA-D9-A1X3-06
- TCGA-FS-A1ZG-06
- TCGA-DA-A1IA-06
- TCGA-EE-A20C-06
- TCGA-D3-A1Q1-06
- TCGA-EE-A180-06
- TCGA-EE-A690-06
- TCGA-D9-A4Z6-06
- TCGA-FS-A1ZY-06
- TCGA-FS-A4F5-06
- TCGA-ER-A19F-06
- TCGA-W3-A824-06
- TCGA-ER-A42K-06
- TCGA-FS-A1ZU-06
- TCGA-WE-A8K6-06
- TCGA-FS-A1ZE-06
- TCGA-3N-A9WB-06
- TCGA-D9-A6EC-06
- TCGA-D3-A3ML-06
- TCGA-FS-A1Z3-06
- TCGA-EE-A17Z-06
- TCGA-D9-A6EG-06
- TCGA-D3-A8G1-06
- TCGA-LH-A9OB-06
- TCGA-YG-AA3P-06
- TCGA-ER-A191-06
- TCGA-WE-A8ZM-06
- TCGA-FS-A1Z1-06
- TCGA-D3-A3C6-06
- TCGA-D3-A3C6-06
- TCGA-DA-A1ZK-06
- TCGA-DA-A95W-06
- TCGA-EE-A2MM-06
- TCGA-FW-A3I3-06
- TCGA-RP-A695-06
- TCGA-EE-A3J7-06
- TCGA-EE-A3AH-06
- TCGA-DA-A95Z-06
- TCGA-EE-A29A-06
- TCGA-FR-A8YD-06
- TCGA-D3-A8GL-06
- TCGA-D3-A1QA-07
- TCGA-FS-A1YW-06
- TCGA-FS-A4F9-06
- TCGA-WE-A8ZQ-06
- TCGA-D3-A8GC-06
- TCGA-EE-A29B-06
- TCGA-D3-A1QA-06
- TCGA-WE-A8JZ-06
- TCGA-D3-A1Q5-06
- TCGA-GN-A262-06
- TCGA-GN-A268-06
- TCGA-FS-A4FB-06
- TCGA-FS-A1ZC-06
- TCGA-EE-A20H-06
- TCGA-FR-A7U8-06
- TCGA-EE-A2A5-06
- TCGA-EE-A3J8-06

# ATP8B1

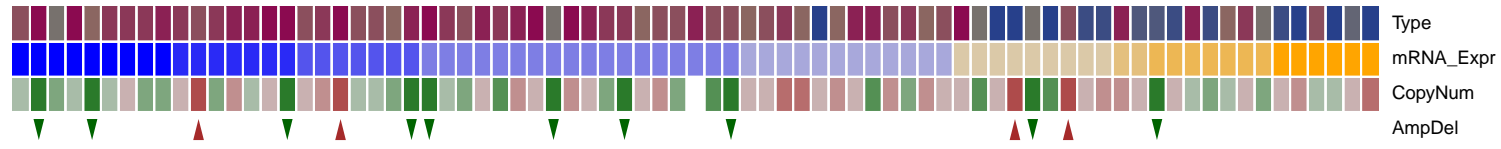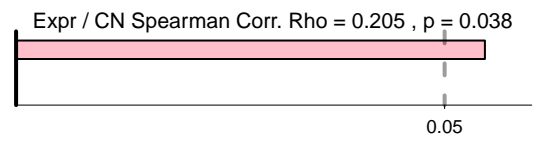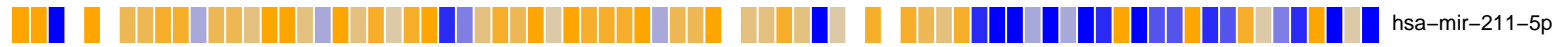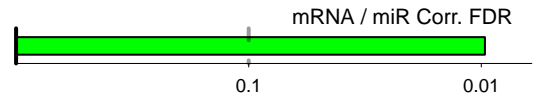

18 : 55471075  
 18 : 55471021  
 18 : 55470506  
 18 : 55470404  
 18 : 55470401  
 18 : 55469864  
 18 : 55469758  
 18 : 55469509  
 18 : 55469021  
 18 : 55466071  
 18 : 55400167  
 18 : 55399003  
 18 : 55318716  
 18 : 55315872  
 18 : 55315848

GeneLoc  
 PromoterAssoc  
 CpGIsland

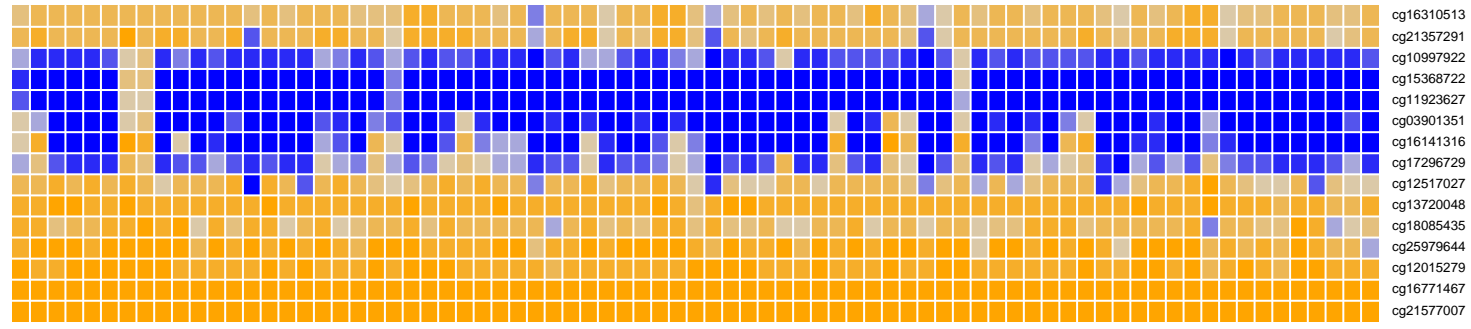

cg16310513  
 cg21357291  
 cg10997922  
 cg15368722  
 cg11923627  
 cg03901351  
 cg16141316  
 cg17296729  
 cg12517027  
 cg13720048  
 cg18085435  
 cg25979644  
 cg12015279  
 cg16771467  
 cg21577007

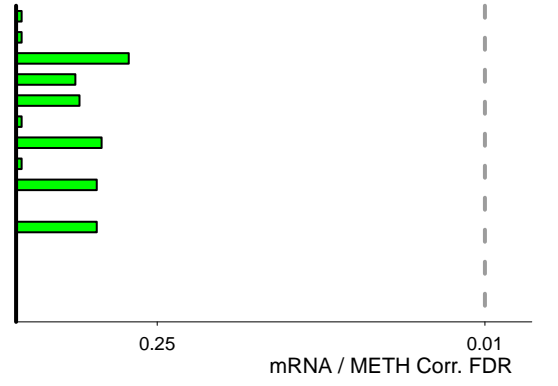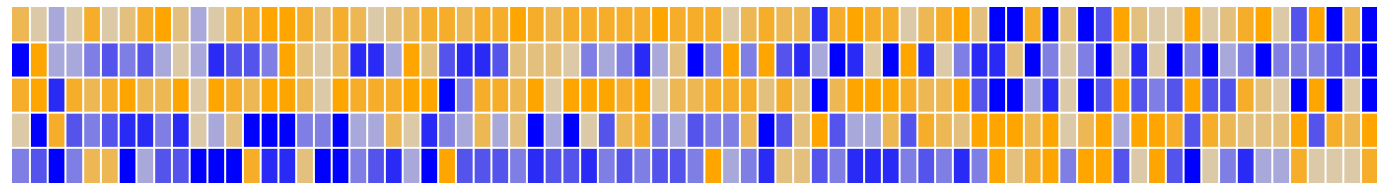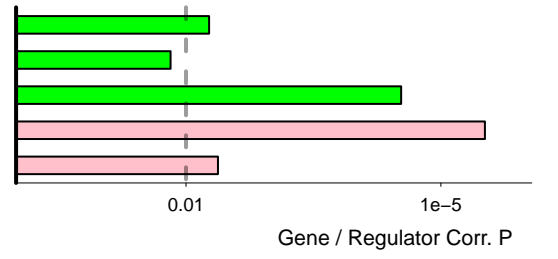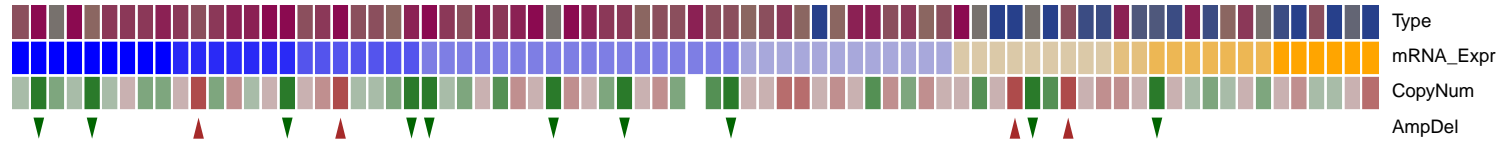

TCGA-W3-A824-06  
 TCGA-DA-A11A-06  
 TCGA-EE-A20C-06  
 TCGA-D3-A8GK-06  
 TCGA-D9-A6EC-06  
 TCGA-3N-A9WB-06  
 TCGA-FS-A4F0-06  
 TCGA-EE-A3JI-06  
 TCGA-EE-A2GF-06  
 TCGA-EE-A29B-06  
 TCGA-D3-A8GV-06  
 TCGA-W3-AA21-06  
 TCGA-EE-A29E-06  
 TCGA-GN-A262-06  
 TCGA-FS-A1ZG-06  
 TCGA-GN-A81L-06  
 TCGA-EE-A19F-06  
 TCGA-D3-A8GF-06  
 TCGA-EE-A29L-06  
 TCGA-FR-A7U8-06  
 TCGA-DA-A95W-06  
 TCGA-EE-A3J7-06  
 TCGA-FS-A1ZY-06  
 TCGA-GN-A8LK-06  
 TCGA-D3-A3ML-06  
 TCGA-DA-A95Z-06  
 TCGA-FS-A1ZS-06  
 TCGA-EE-A180-06  
 TCGA-GN-A4U7-06  
 TCGA-EE-A3AH-06  
 TCGA-EE-A185-06  
 TCGA-GN-A268-06  
 TCGA-EE-A29D-06  
 TCGA-FS-A1YW-06  
 TCGA-YG-AA3P-06  
 TCGA-D9-A1X3-06  
 TCGA-D3-A1QA-07  
 TCGA-D3-A1O1-06  
 TCGA-D3-A8GI-06  
 TCGA-FS-A1Z3-06  
 TCGA-EE-A17Z-06  
 TCGA-D3-A1QA-06  
 TCGA-WE-A8JZ-06  
 TCGA-EE-A42K-06  
 TCGA-FS-A1Z1-06  
 TCGA-D9-A6EG-06  
 TCGA-EE-A3AD-06  
 TCGA-EE-A4F9-06  
 TCGA-EE-A8YD-06  
 TCGA-FS-A1FB-06  
 TCGA-D3-A8GL-06  
 TCGA-D3-A3C6-06  
 TCGA-EE-A2GO-06  
 TCGA-D3-A1Q3-06  
 TCGA-EE-A29A-06  
 TCGA-FS-A1ZU-06  
 TCGA-EE-A2MN-06  
 TCGA-WE-A8K6-06  
 TCGA-D9-A4Z6-06  
 TCGA-ER-A191-06  
 TCGA-WE-A8ZM-06  
 TCGA-EE-A3ES-06  
 TCGA-EE-A3J8-06  
 TCGA-FS-A4F5-06  
 TCGA-D3-A5GL-06  
 TCGA-FW-A3I3-06  
 TCGA-D3-A3MO-06  
 TCGA-LH-A9QB-06  
 TCGA-RP-A690-06  
 TCGA-EE-A20H-06  
 TCGA-EE-A2A5-06  
 TCGA-FS-A1ZC-06

# AMOTL2

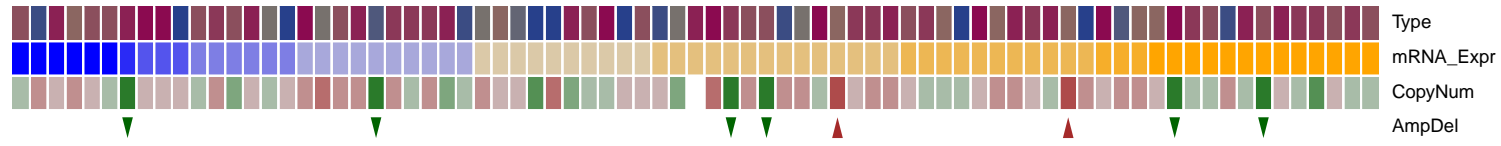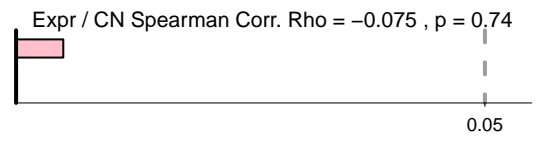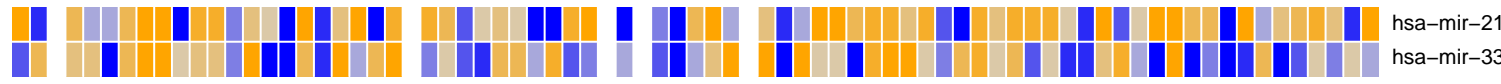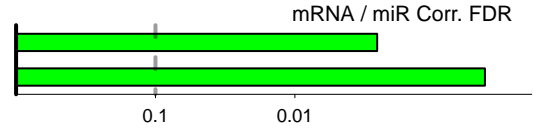

- 3 : 134094537
- 3 : 134093850
- 3 : 134093627
- 3 : 134093562
- 3 : 134093551
- 3 : 134093413
- 3 : 134093380
- 3 : 134092862
- 3 : 134092812
- 3 : 134092715
- 3 : 134092614
- 3 : 134092608
- 3 : 134090737
- 3 : 134088357
- 3 : 134083286
- 3 : 134083158
- 3 : 134083139
- 3 : 134083080
- 3 : 134080574
- 3 : 134080517
- 3 : 134080397
- 3 : 134078647
- 3 : 134077032
- 3 : 134074767

GeneLoc  
PromoterAssoc  
CpGIsland

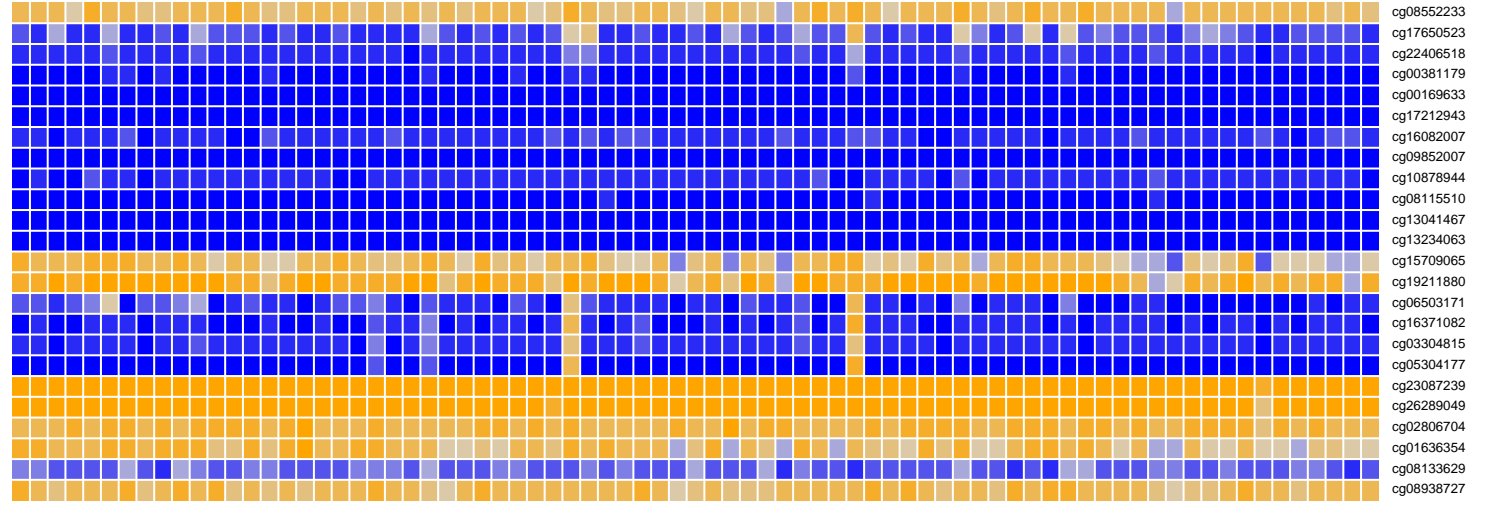

- cg08552233
- cg17650523
- cg22406518
- cg00381179
- cg00169633
- cg17212943
- cg16082007
- cg09852007
- cg10878944
- cg08115510
- cg13041467
- cg13234063
- cg15709065
- cg19211880
- cg06503171
- cg16371082
- cg03304815
- cg05304177
- cg23087239
- cg26289049
- cg02806704
- cg01636354
- cg08133629
- cg08938727

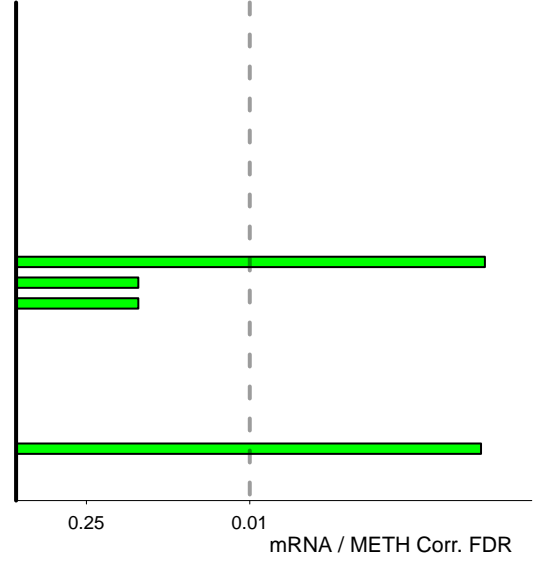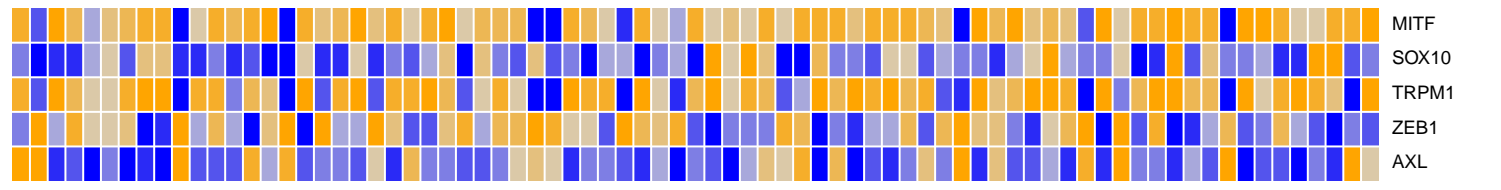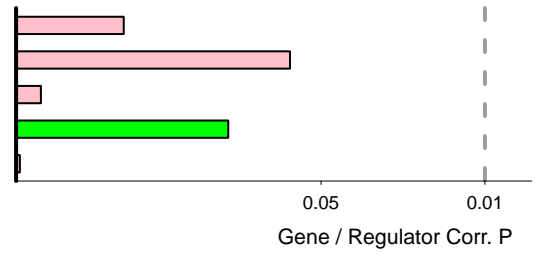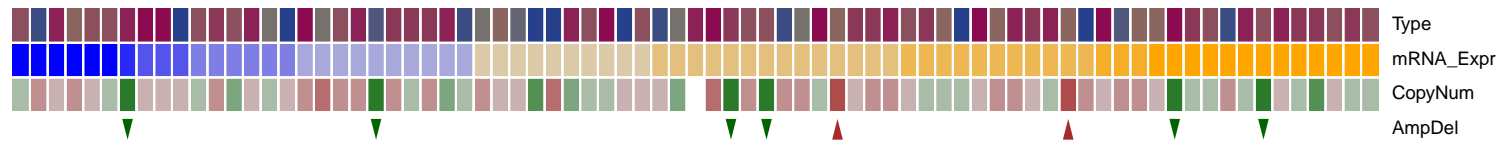

- TCGA-D3-A1Q1-06
- TCGA-WE-A8K6-06
- TCGA-D9-A6EG-06
- TCGA-FS-A4FB-06
- TCGA-D3-A8GV-06
- TCGA-FS-A1ZU-06
- TCGA-GN-A262-06
- TCGA-GN-A4U7-06
- TCGA-GN-A8LK-06
- TCGA-FE-A2GO-06
- TCGA-DA-A95W-06
- TCGA-FE-A29D-06
- TCGA-DA-A95Z-06
- TCGA-FE-A29E-06
- TCGA-FS-A3I3-06
- TCGA-FS-A1ZC-06
- TCGA-FE-A118-06
- TCGA-D3-A3C8-06
- TCGA-FR-A7U8-06
- TCGA-D9-A4Z6-06
- TCGA-ER-A19L-06
- TCGA-D3-A5GL-06
- TCGA-3N-A9WB-06
- TCGA-RP-A69S-06
- TCGA-EE-A180-06
- TCGA-WE-A8ZQ-06
- TCGA-EE-A3AH-06
- TCGA-FS-A1Z3-06
- TCGA-EE-A2A5-06
- TCGA-D3-A1Q5-06
- TCGA-EE-A20H-06
- TCGA-GN-A268-06
- TCGA-W3-A824-06
- TCGA-D3-A8GK-06
- TCGA-ER-A42K-06
- TCGA-FS-A4F9-06
- TCGA-D3-A3MO-06
- TCGA-EE-A20C-06
- TCGA-D3-A1QA-07
- TCGA-DA-A1IA-06
- TCGA-D3-A8GP-06
- TCGA-ER-A19F-06
- TCGA-EE-A3J8-06
- TCGA-D3-A8GC-06
- TCGA-EE-A29I-06
- TCGA-D9-A6EC-06
- TCGA-FS-A4F0-06
- TCGA-FS-A1ZK-06
- TCGA-FE-A3AB-06
- TCGA-FS-A1ZB-06
- TCGA-D3-A1QA-06
- TCGA-FS-A4F3-06
- TCGA-EE-A29A-06
- TCGA-D3-A8GL-06
- TCGA-WE-A8JZ-06
- TCGA-EE-A2GR-06
- TCGA-EE-A29B-06
- TCGA-FS-A1ZY-06
- TCGA-EE-A3J7-06
- TCGA-LH-A9QB-06
- TCGA-FS-A1ZG-06
- TCGA-WE-A8ZN-06
- TCGA-FS-A1ZJ-06
- TCGA-FS-A1YW-06
- TCGA-GN-A8LL-06
- TCGA-EE-A3JI-06
- TCGA-D9-A1X3-06
- TCGA-EE-A2MM-06
- TCGA-ER-A3ES-06
- TCGA-YG-AA3P-06
- TCGA-FS-A1ZZ-06
- TCGA-W3-AA21-06
- TCGA-FR-A8YD-06
- TCGA-EE-A17Z-06
- TCGA-D3-A3MI-06
- TCGA-RP-A690-06



# LMO7

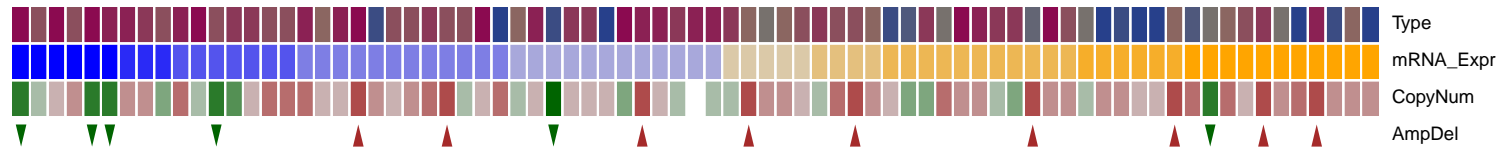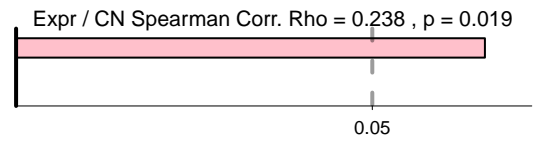

13 : 76195284  
 13 : 76207486  
 13 : 76209457  
 13 : 76209541  
 13 : 76210054  
 13 : 76210838  
 13 : 76211051  
 13 : 76211251  
 13 : 76215076  
 13 : 76235074  
 13 : 76250138  
 13 : 76259545  
 13 : 76267059  
 13 : 76279228  
 13 : 76291075  
 13 : 76313846  
 13 : 76323667  
 13 : 76333727  
 13 : 76334039  
 13 : 76334583  
 13 : 76334707  
 13 : 76334728  
 13 : 76334866  
 13 : 76344333  
 13 : 76361354  
 13 : 76363851  
 13 : 76377366  
 13 : 76387161  
 13 : 76392745  
 13 : 76400715  
 13 : 76430089  
 13 : 76430188  
 13 : 76430665  
 13 : 76430722  
 13 : 76432094

GeneLoc  
 PromoterAssoc  
 CpGIsland

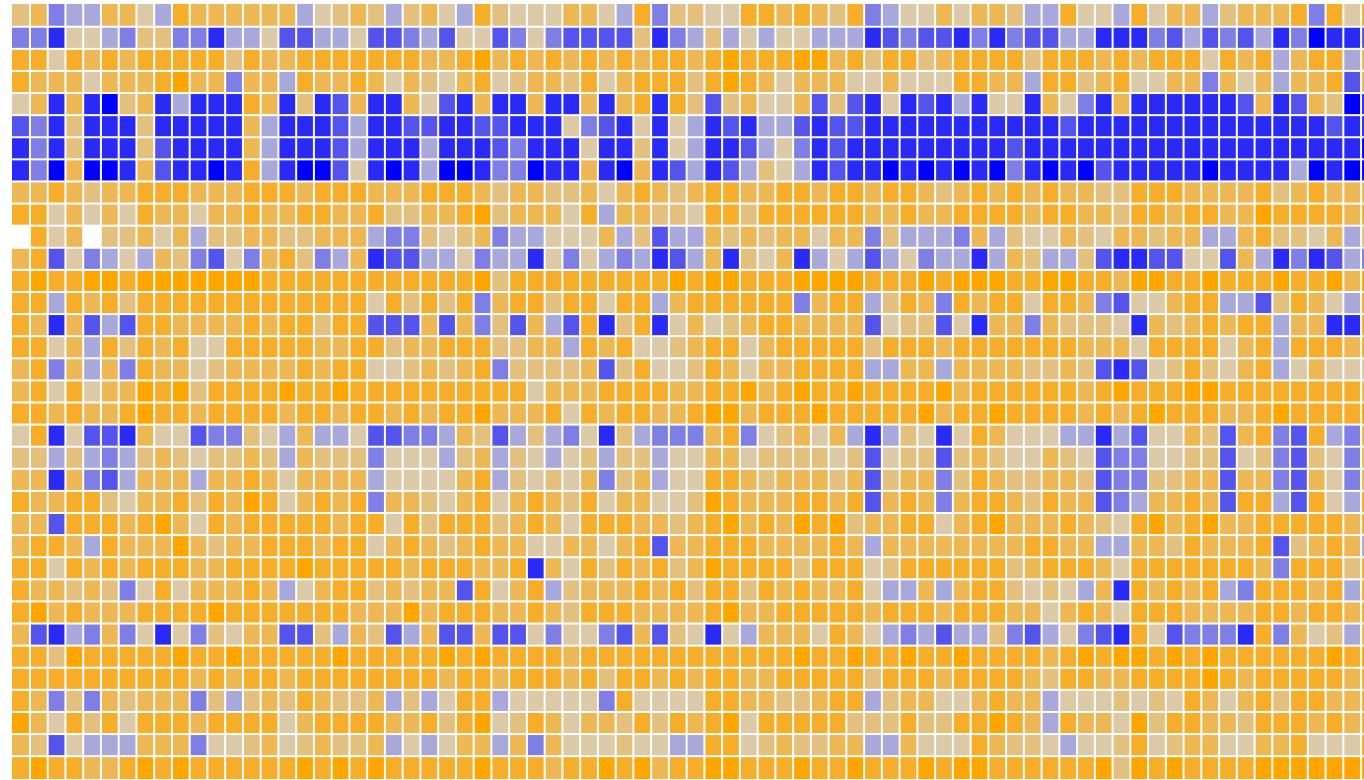

cg16409306  
 cg13134634  
 cg23886165  
 cg00574740  
 cg08579070  
 cg16591502  
 cg06636685  
 cg02607802  
 cg22599740  
 cg18027592  
 cg05078075  
 cg04757411  
 cg00246840  
 cg15229454  
 cg26400954  
 cg00902815  
 cg25755057  
 cg11014582  
 cg19861914  
 cg14675361  
 cg10581837  
 cg02714303  
 cg12166476  
 cg17512989  
 cg13060233  
 cg02349334  
 cg06946543  
 cg11440915  
 cg11831419  
 cg26287240  
 cg21476824  
 cg09161542  
 cg02264407  
 cg01178924  
 cg11959007

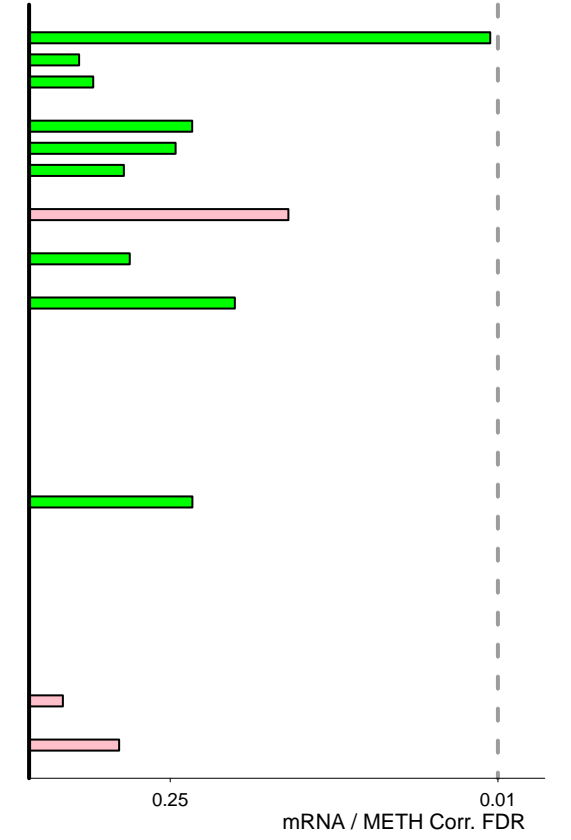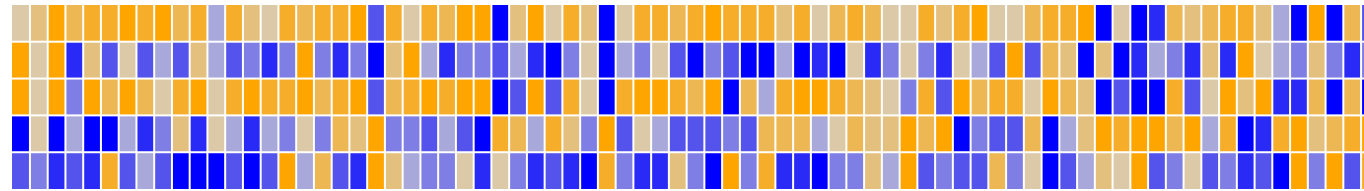

MITF  
 SOX10  
 TRPM1  
 ZEB1  
 AXL

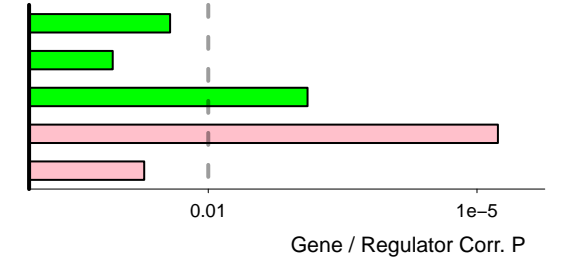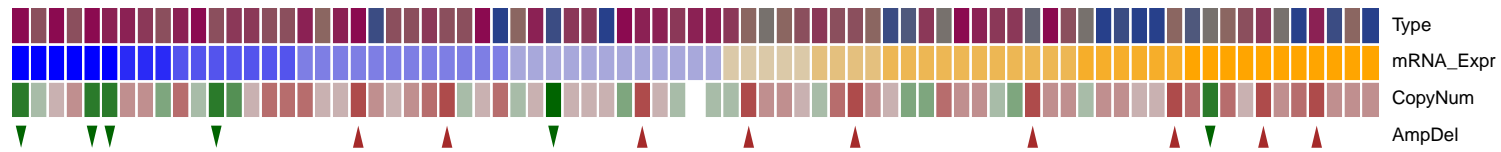

TCGA-DA-A1IA-06  
 TCGA-FS-A1ZU-06  
 TCGA-GN-A8LL-06  
 TCGA-DA-A95Z-06  
 TCGA-GN-A4U7-06  
 TCGA-EE-A29E-06  
 TCGA-D9-A4Z6-06  
 TCGA-EE-A3J1-06  
 TCGA-YG-AA3P-06  
 TCGA-GN-A262-06  
 TCGA-GN-A8LK-06  
 TCGA-D3-A8GV-06  
 TCGA-FS-A1ZK-06  
 TCGA-DA-A95W-06  
 TCGA-D3-A1Q1-06  
 TCGA-FS-A1ZY-06  
 TCGA-D9-A6EC-06  
 TCGA-FS-A1ZZ-06  
 TCGA-D3-A6GL-06  
 TCGA-WE-A6K6-06  
 TCGA-ER-A19F-06  
 TCGA-D3-A8GI-06  
 TCGA-EP-A695-06  
 TCGA-FR-A7U8-06  
 TCGA-EP-A690-06  
 TCGA-FS-A1ZG-06  
 TCGA-EE-A20H-06  
 TCGA-FS-A4F5-06  
 TCGA-D9-A6EG-06  
 TCGA-WE-A8ZQ-06  
 TCGA-D3-A5GL-06  
 TCGA-D3-A8GP-06  
 TCGA-FS-A1ZC-06  
 TCGA-D3-A8GK-06  
 TCGA-GN-A268-06  
 TCGA-EE-A3AD-06  
 TCGA-D3-A1QA-07  
 TCGA-ER-A3ES-06  
 TCGA-D3-A3ML-06  
 TCGA-FS-A1ZJ-06  
 TCGA-D3-A8GC-06  
 TCGA-EE-A3J7-06  
 TCGA-FS-A4F9-06  
 TCGA-W3-AA21-06  
 TCGA-W3-A824-06  
 TCGA-FS-A1ZE-06  
 TCGA-WE-A8TZ-06  
 TCGA-D3-A3M0-06  
 TCGA-WE-A8ZM-06  
 TCGA-EE-A29D-06  
 TCGA-D3-A3C6-06  
 TCGA-EE-A185-06  
 TCGA-EE-AZGR-06  
 TCGA-3N-A9WB-06  
 TCGA-FR-A8YD-06  
 TCGA-EE-A2A5-06  
 TCGA-EE-A29L-06  
 TCGA-D9-A1X3-06  
 TCGA-FW-A3I3-06  
 TCGA-D3-A1Q5-06  
 TCGA-EE-A3J8-06  
 TCGA-EE-A2G0-06  
 TCGA-ER-A42K-06  
 TCGA-FS-A1Z3-06  
 TCGA-ER-A19L-06  
 TCGA-EE-A3AH-06  
 TCGA-FS-A1YW-06  
 TCGA-EE-A29B-06  
 TCGA-EE-A20C-06  
 TCGA-EE-A29A-06  
 TCGA-EE-A180-06  
 TCGA-EE-A2MM-06  
 TCGA-FS-A4FB-06  
 TCGA-LH-A9QB-06

# RAC2

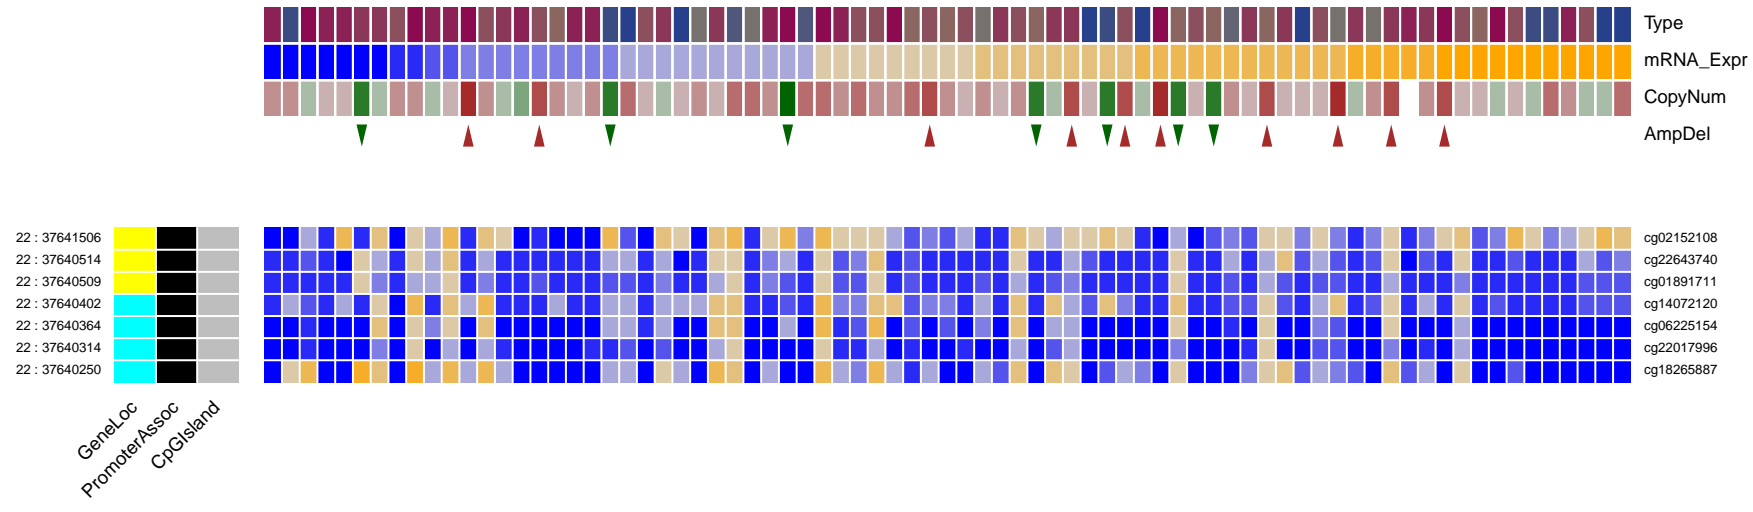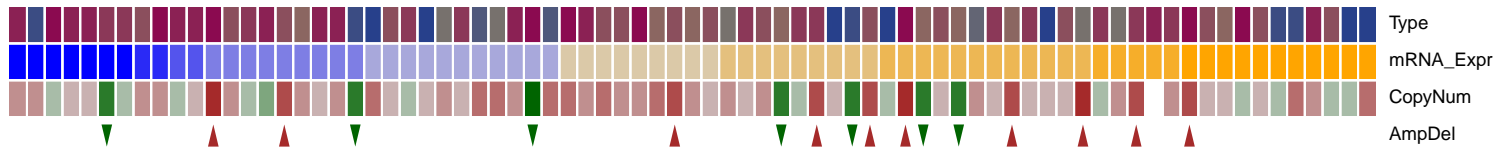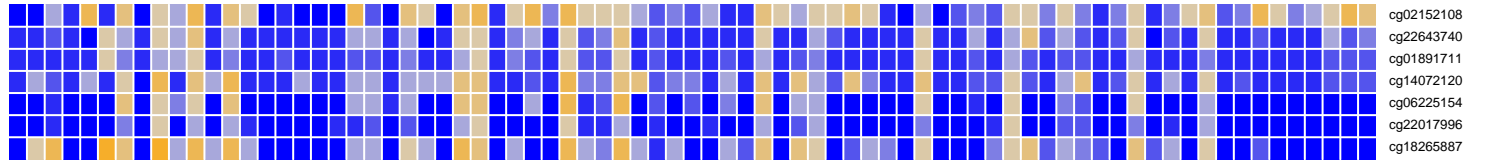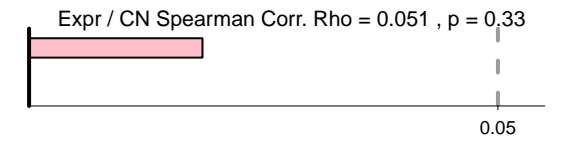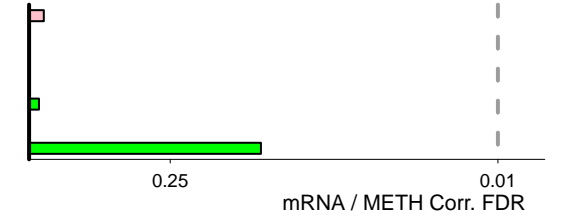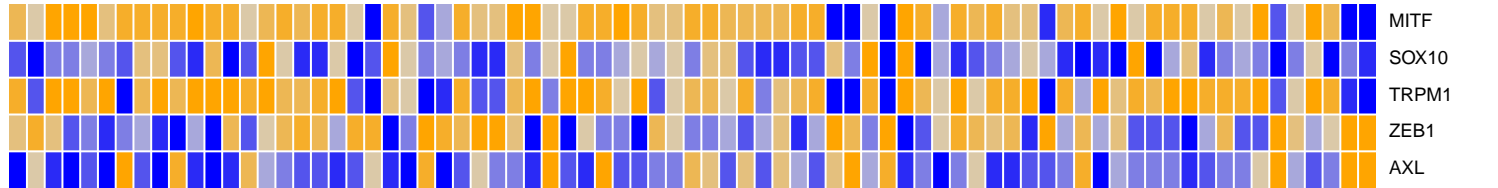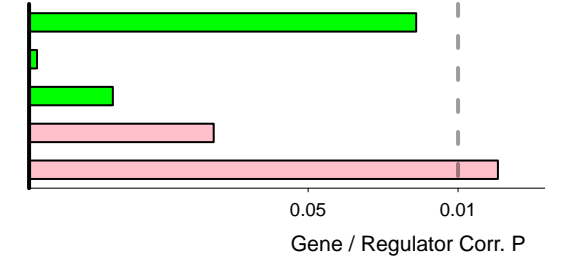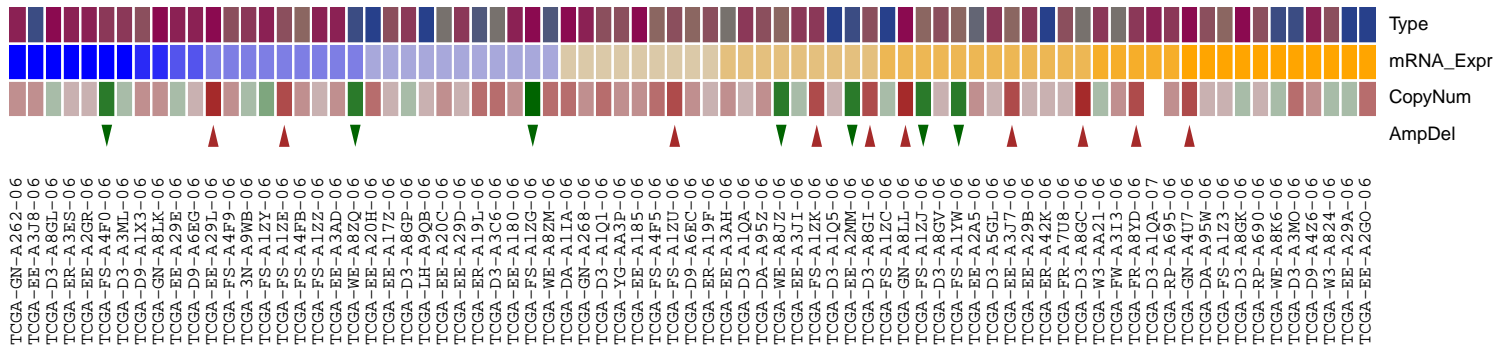

TCGA-GN-A262-06  
 TCGA-EE-A3J8-06  
 TCGA-D3-A8GL-06  
 TCGA-ER-A3ES-06  
 TCGA-EE-A2GR-06  
 TCGA-FS-A4F0-06  
 TCGA-D3-A3ML-06  
 TCGA-D9-A1X3-06  
 TCGA-GN-A8LK-06  
 TCGA-EE-A29E-06  
 TCGA-D9-A6EG-06  
 TCGA-EE-A29L-06  
 TCGA-FS-A4F9-06  
 TCGA-3N-A9WB-06  
 TCGA-FS-A1ZY-06  
 TCGA-FS-A1ZE-06  
 TCGA-FS-A4EB-06  
 TCGA-FS-A1ZZ-06  
 TCGA-EE-A3AD-06  
 TCGA-WE-A8ZQ-06  
 TCGA-EE-A20H-06  
 TCGA-EE-A17Z-06  
 TCGA-D3-A8GF-06  
 TCGA-LH-A9QB-06  
 TCGA-EE-A20C-06  
 TCGA-EE-A29D-06  
 TCGA-ER-A19L-06  
 TCGA-D3-A3C6-06  
 TCGA-EE-A180-06  
 TCGA-FS-A1ZG-06  
 TCGA-WE-A8ZM-06  
 TCGA-DA-A1IA-06  
 TCGA-GN-A268-06  
 TCGA-D3-A1Q1-06  
 TCGA-YG-AA3P-06  
 TCGA-EE-A185-06  
 TCGA-FS-A4F5-06  
 TCGA-FS-A1ZU-06  
 TCGA-D9-A6EC-06  
 TCGA-ER-A19F-06  
 TCGA-EE-A3AH-06  
 TCGA-D3-A1QA-06  
 TCGA-DA-A95Z-06  
 TCGA-WE-A8JZ-06  
 TCGA-EE-A3J1-06  
 TCGA-FS-A1ZK-06  
 TCGA-D3-A1O5-06  
 TCGA-EE-A2NM-06  
 TCGA-D3-A8GI-06  
 TCGA-FS-A1ZC-06  
 TCGA-GN-A8LJ-06  
 TCGA-FS-A1ZJ-06  
 TCGA-D3-A8GV-06  
 TCGA-EE-A2A5-06  
 TCGA-D3-A5GL-06  
 TCGA-EE-A3J7-06  
 TCGA-EE-A29B-06  
 TCGA-ER-A4ZK-06  
 TCGA-FR-A7U8-06  
 TCGA-D3-A8GC-06  
 TCGA-W3-AA21-06  
 TCGA-FW-A3I3-06  
 TCGA-FR-A8YD-06  
 TCGA-D3-A1QA-07  
 TCGA-RP-A695-06  
 TCGA-GN-A4U7-06  
 TCGA-DA-A95W-06  
 TCGA-FS-A1Z3-06  
 TCGA-D3-A8GK-06  
 TCGA-RP-A690-06  
 TCGA-WE-A8K6-06  
 TCGA-D3-A3MO-06  
 TCGA-D9-A4Z6-06  
 TCGA-W3-A824-06  
 TCGA-EE-A29A-06  
 TCGA-EE-A2G0-06

# ARHGEF28

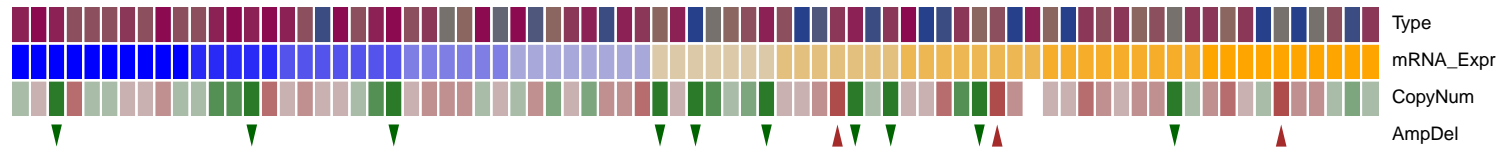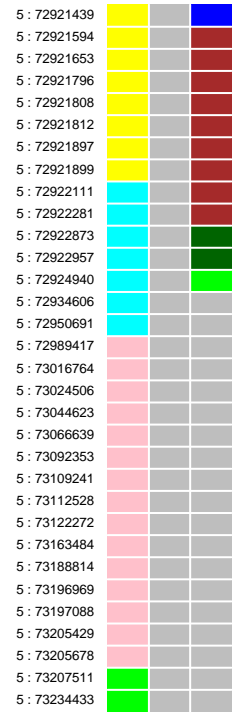

GeneLoc  
PromoterAssoc  
CpGIsland

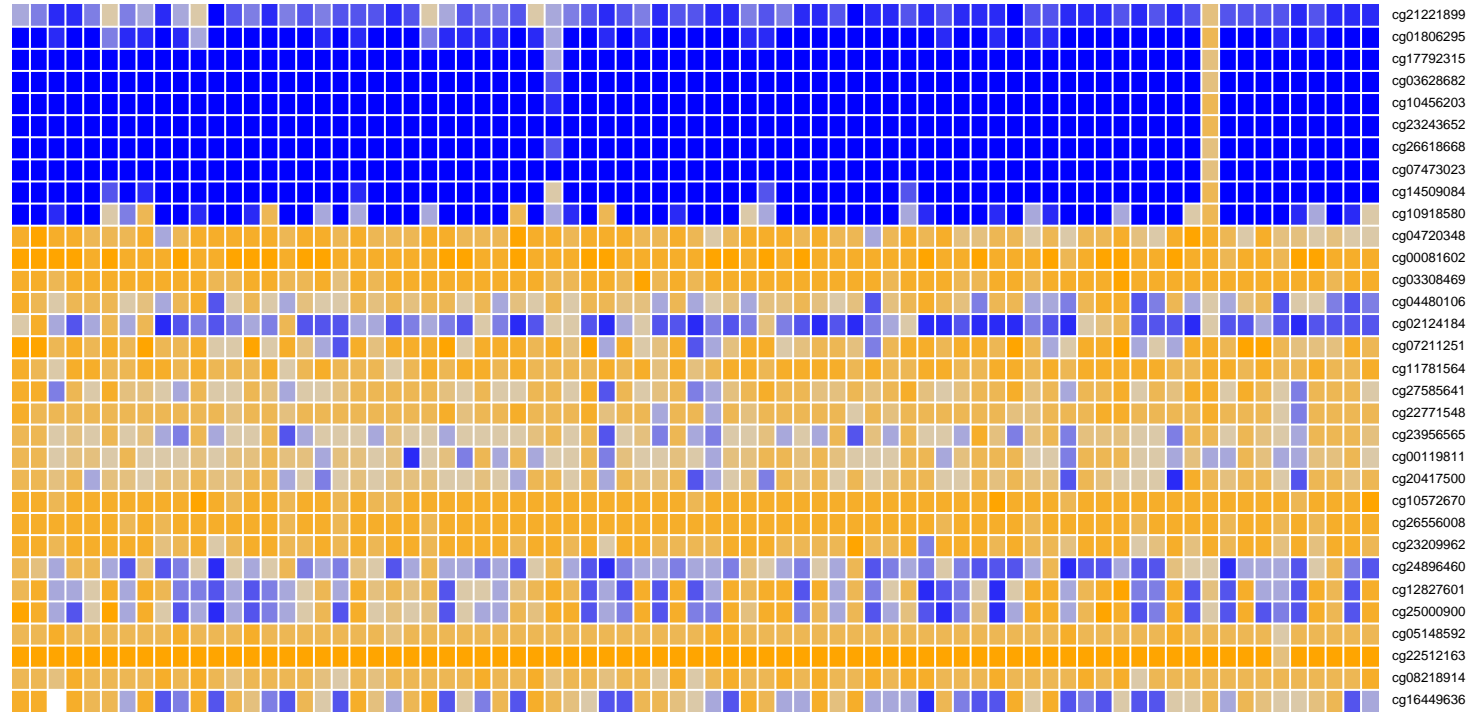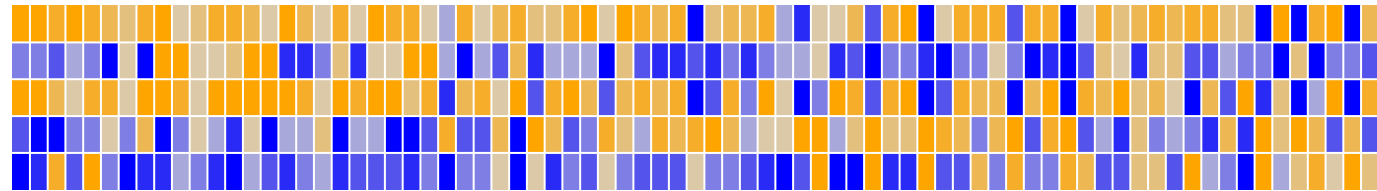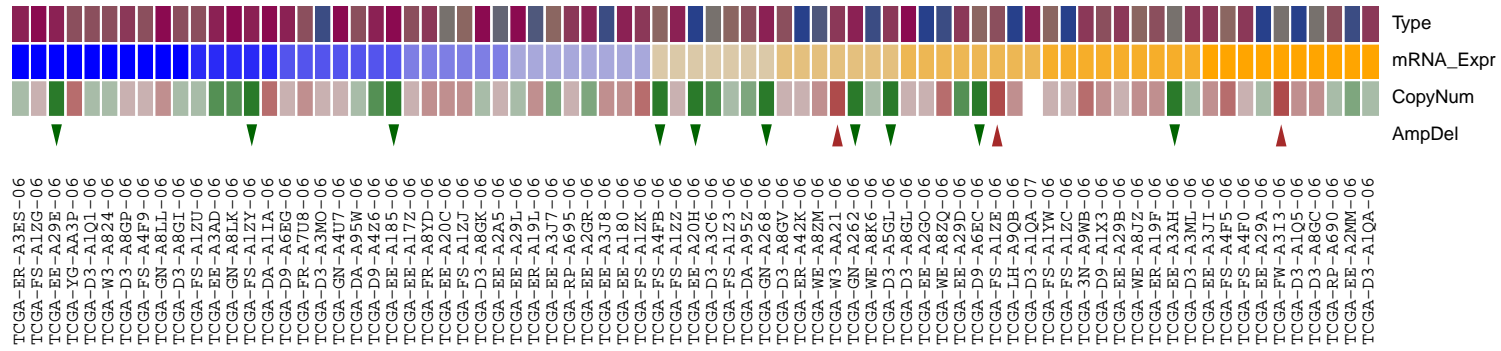

TCGA-BR-A3ES-06  
TCGA-FS-A1ZG-06  
TCGA-EE-A29E-06  
TCGA-YG-AA3P-06  
TCGA-D3-A1Q1-06  
TCGA-W3-A824-06  
TCGA-D3-A8GF-06  
TCGA-FS-A4F9-06  
TCGA-GN-A8LL-06  
TCGA-D3-A8GH-06  
TCGA-FS-A1ZU-06  
TCGA-EE-A3AD-06  
TCGA-GN-A8LK-06  
TCGA-PS-A1ZY-06  
TCGA-DA-A1JA-06  
TCGA-D9-A6EG-06  
TCGA-EE-A7U8-06  
TCGA-D3-A3MO-06  
TCGA-GN-A4U7-06  
TCGA-DA-A95W-06  
TCGA-D9-A4Z6-06  
TCGA-EE-A185-06  
TCGA-EE-A17Z-06  
TCGA-FR-A8YD-06  
TCGA-EE-A20C-06  
TCGA-FS-A1ZJ-06  
TCGA-D3-A8GK-06  
TCGA-EE-A2A5-06  
TCGA-EE-A29L-06  
TCGA-ER-A19L-06  
TCGA-EE-A3J7-06  
TCGA-RP-A695-06  
TCGA-EE-A2GR-06  
TCGA-EE-A3J8-06  
TCGA-EE-A180-06  
TCGA-FS-A1ZK-06  
TCGA-FS-A4FB-06  
TCGA-EE-A20H-06  
TCGA-D3-A3C6-06  
TCGA-FS-A1Z3-06  
TCGA-DA-A95Z-06  
TCGA-GN-A268-06  
TCGA-D3-A8GV-06  
TCGA-ER-A42K-06  
TCGA-WE-A8ZW-06  
TCGA-W3-AA21-06  
TCGA-GN-A262-06  
TCGA-WE-A8K6-06  
TCGA-D3-A5GL-06  
TCGA-D3-A8GL-06  
TCGA-EE-A2GO-06  
TCGA-WE-A8ZQ-06  
TCGA-EE-A29D-06  
TCGA-D9-A6EC-06  
TCGA-FS-A1ZE-06  
TCGA-LH-A9QB-06  
TCGA-D3-A1QA-07  
TCGA-FS-A1YW-06  
TCGA-FS-A1ZC-06  
TCGA-2N-A9WB-06  
TCGA-D9-A1X3-06  
TCGA-EE-A29B-06  
TCGA-WE-A8JZ-06  
TCGA-ER-A19F-06  
TCGA-EE-A3AH-06  
TCGA-D3-A3ML-06  
TCGA-EE-A3JT-06  
TCGA-FS-A4F5-06  
TCGA-FS-A4F0-06  
TCGA-EE-A29A-06  
TCGA-FW-A3I3-06  
TCGA-D3-A1O5-06  
TCGA-D3-A8GC-06  
TCGA-RP-A690-06  
TCGA-EE-A2MW-06  
TCGA-D3-A1QA-06

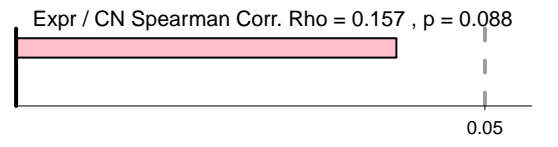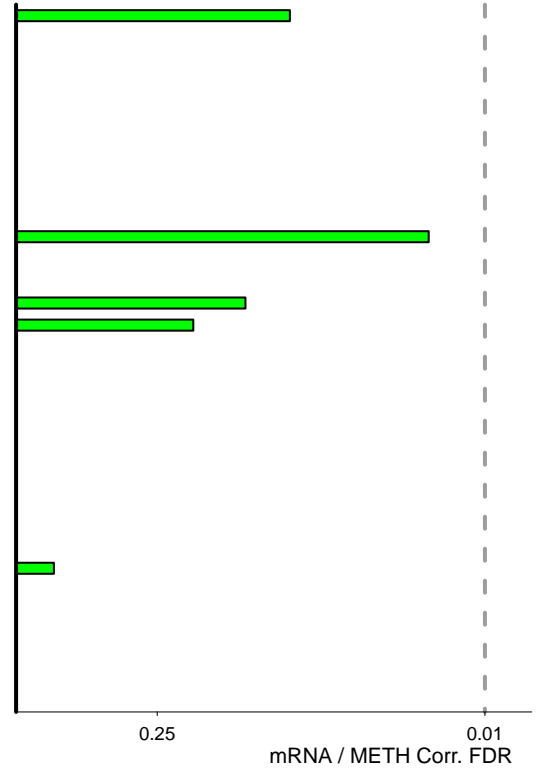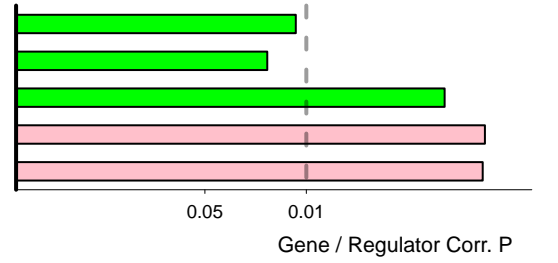

# COL1A1

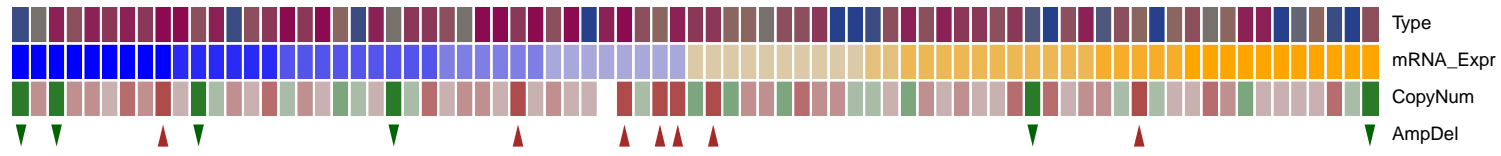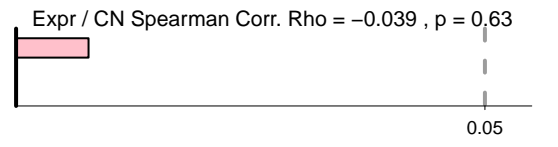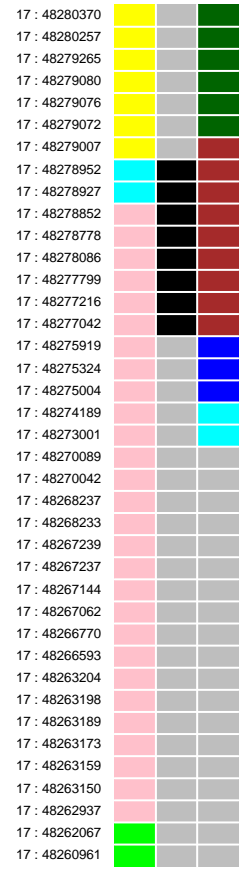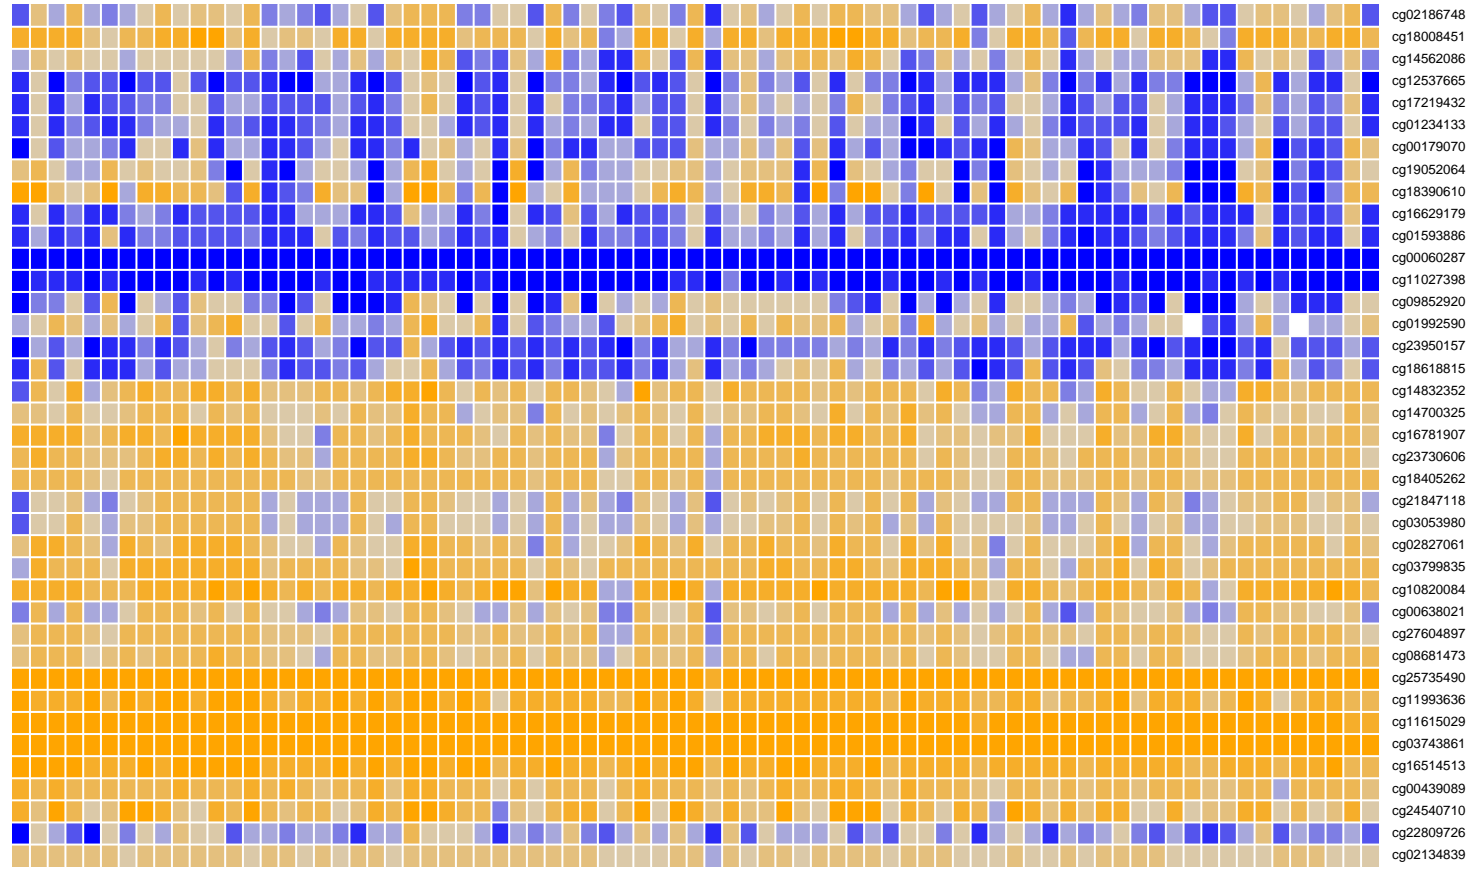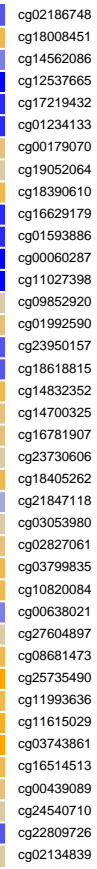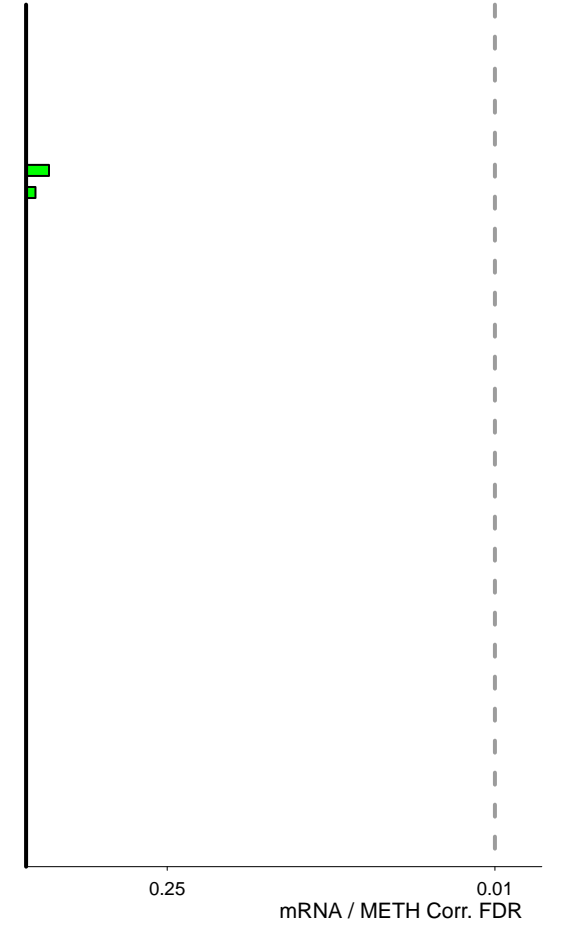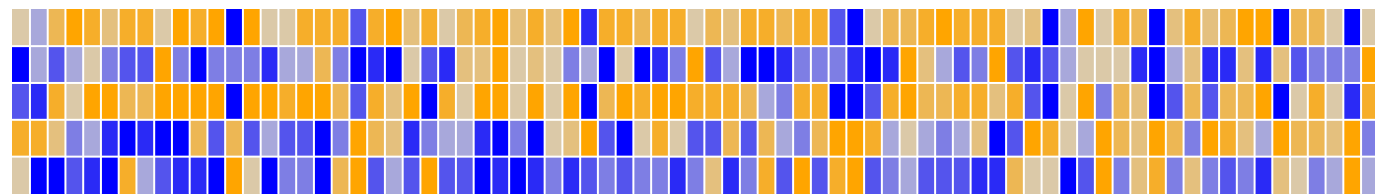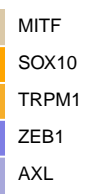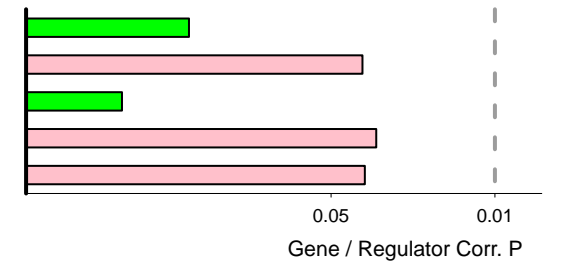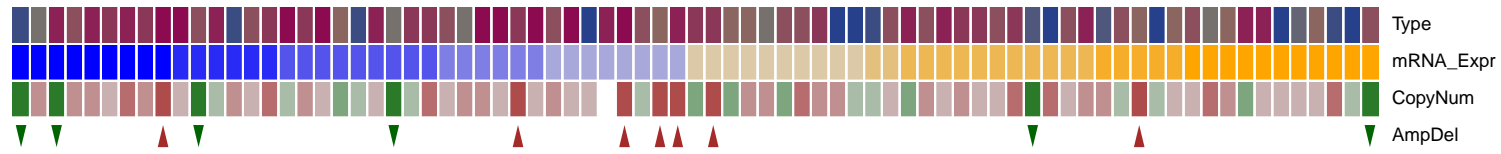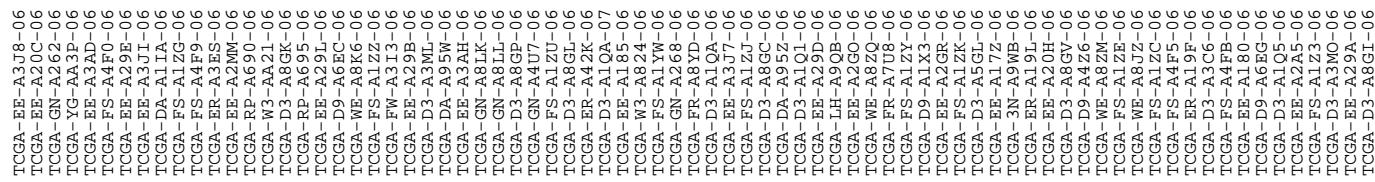

# LOX

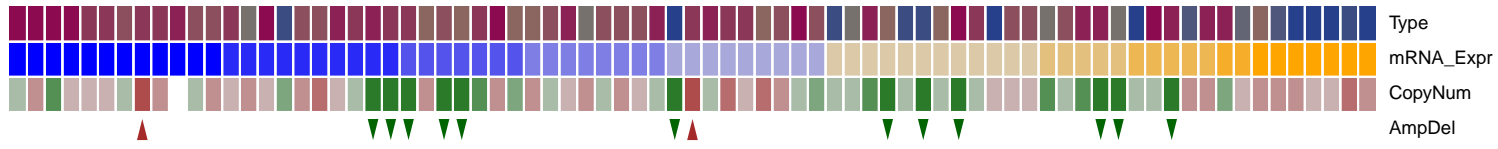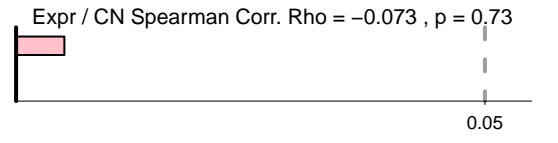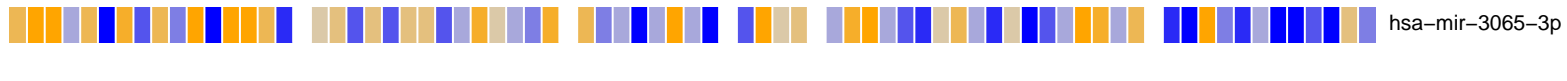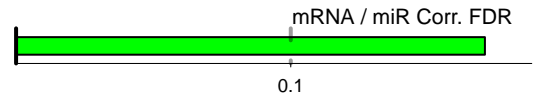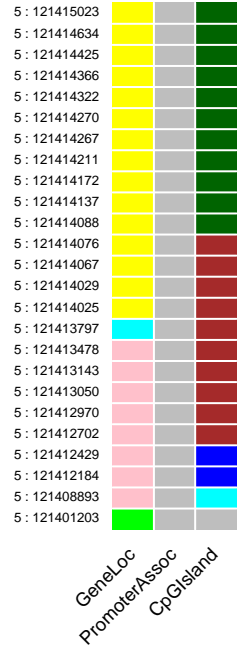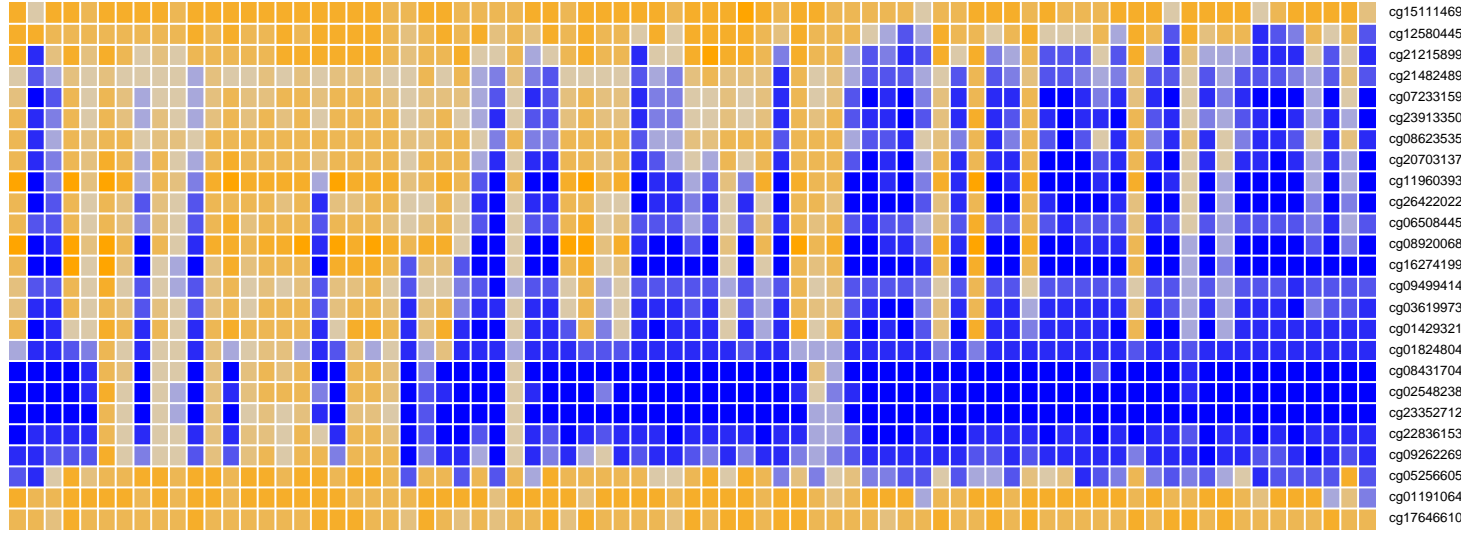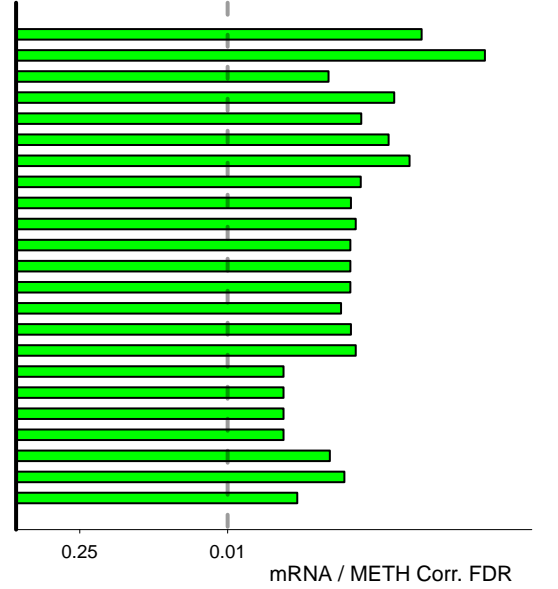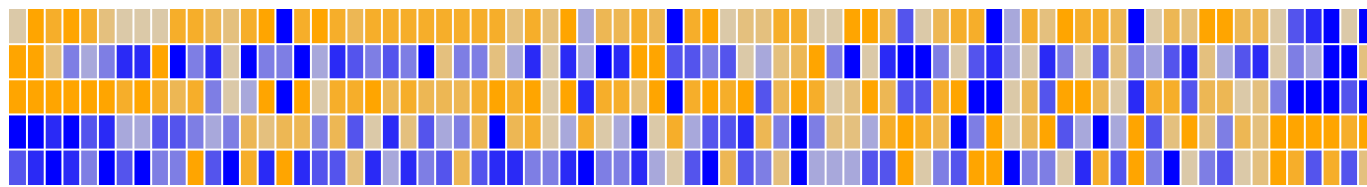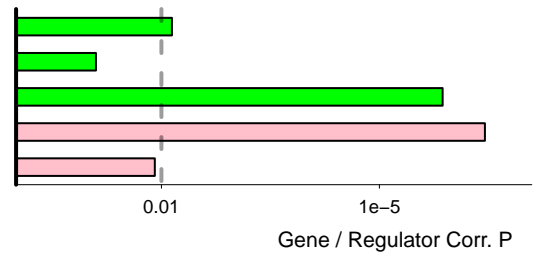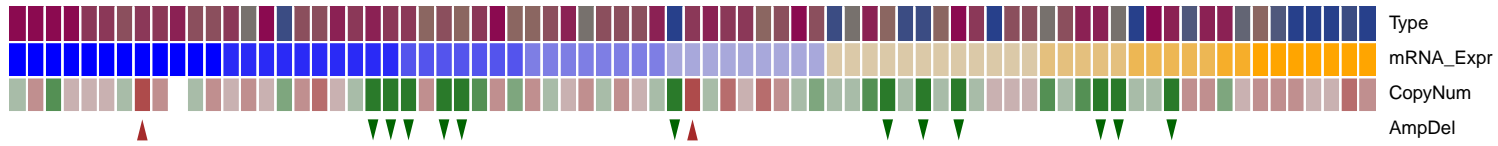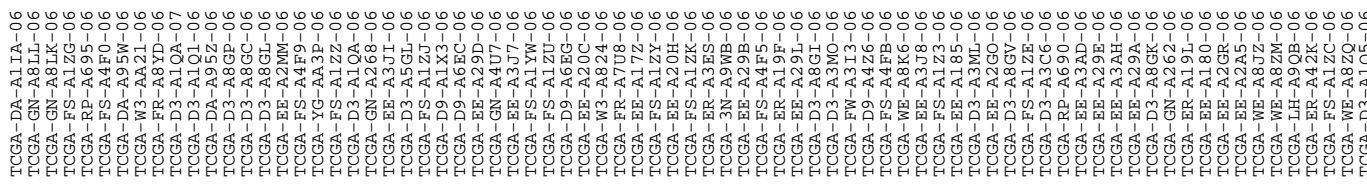

# FGF5

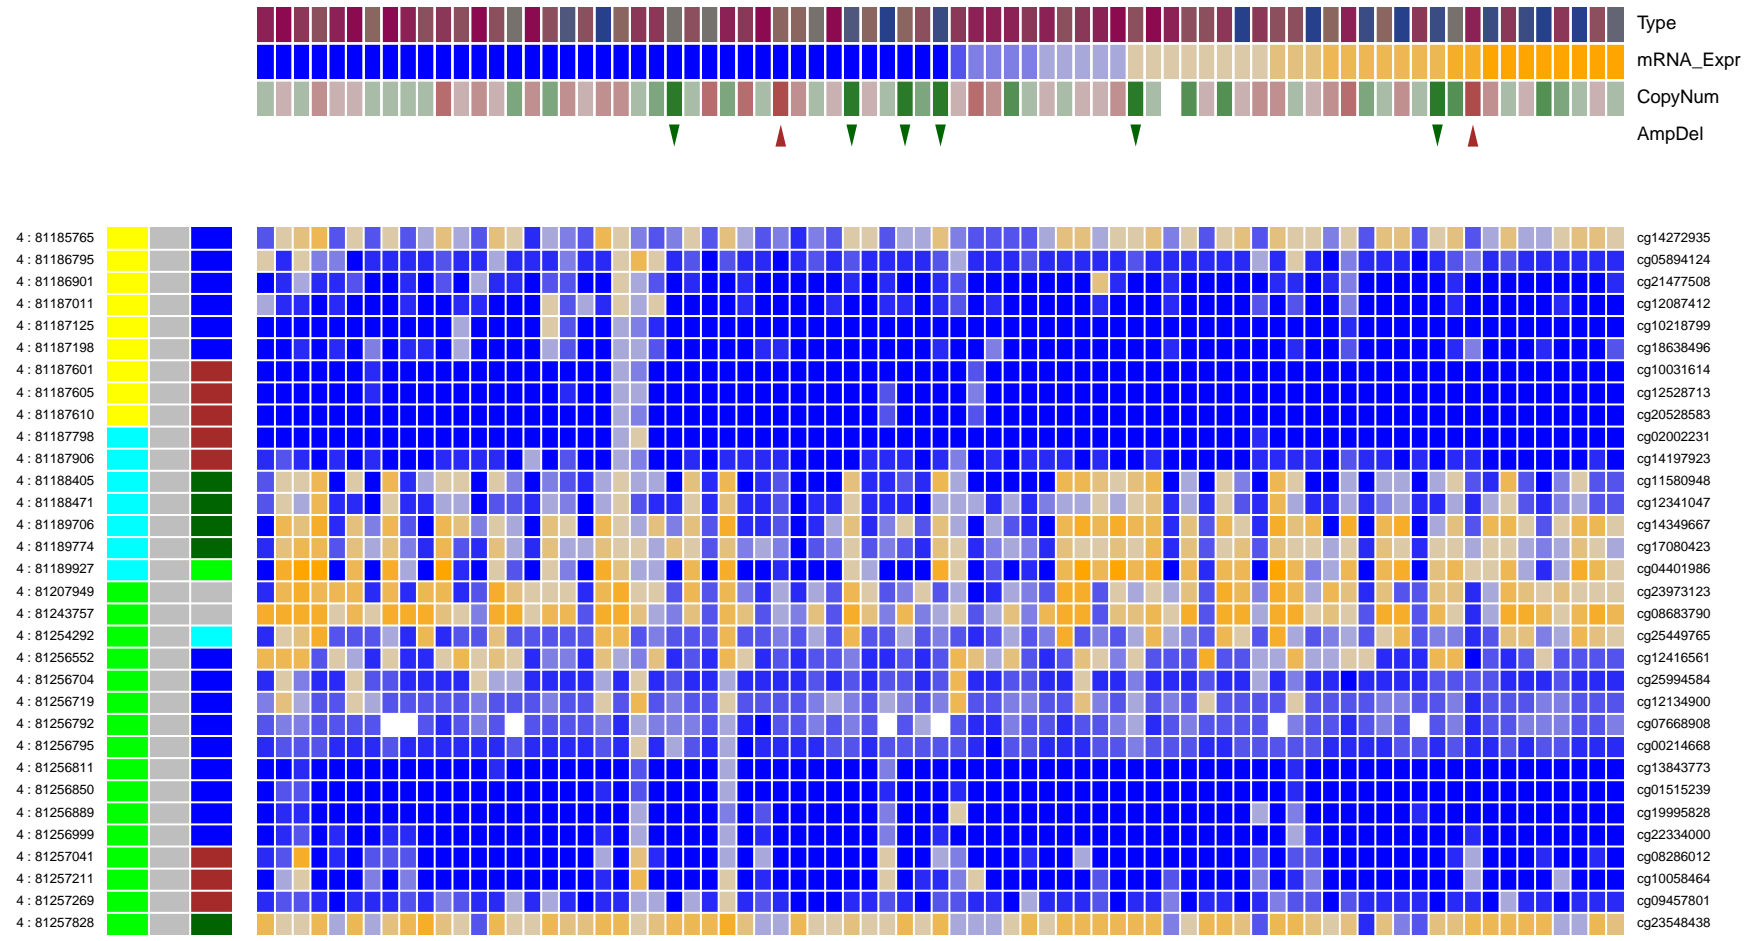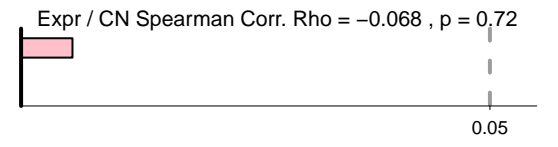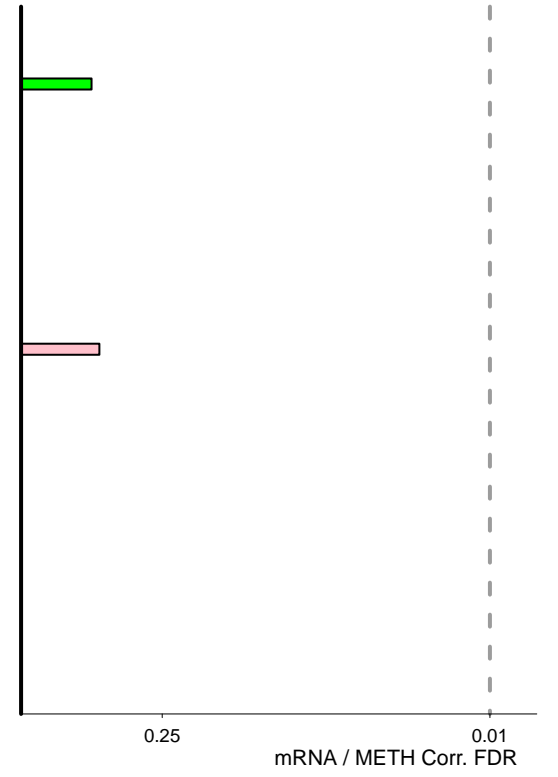

GeneLoc  
PromoterAssoc  
CpGIsland

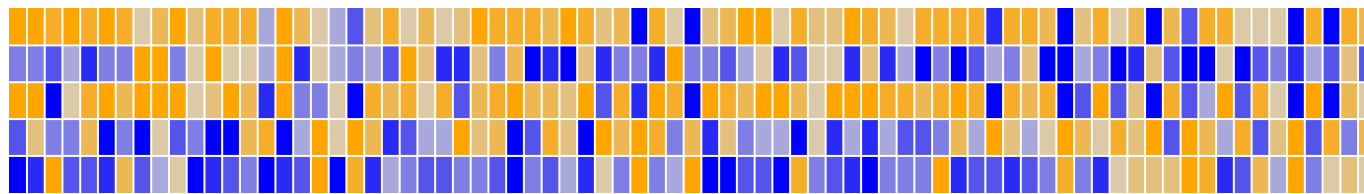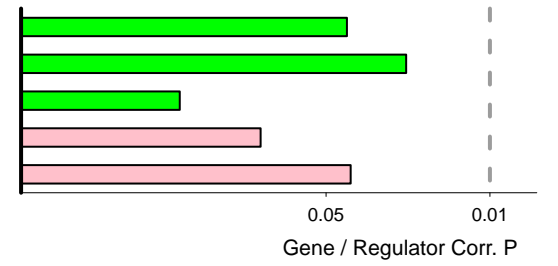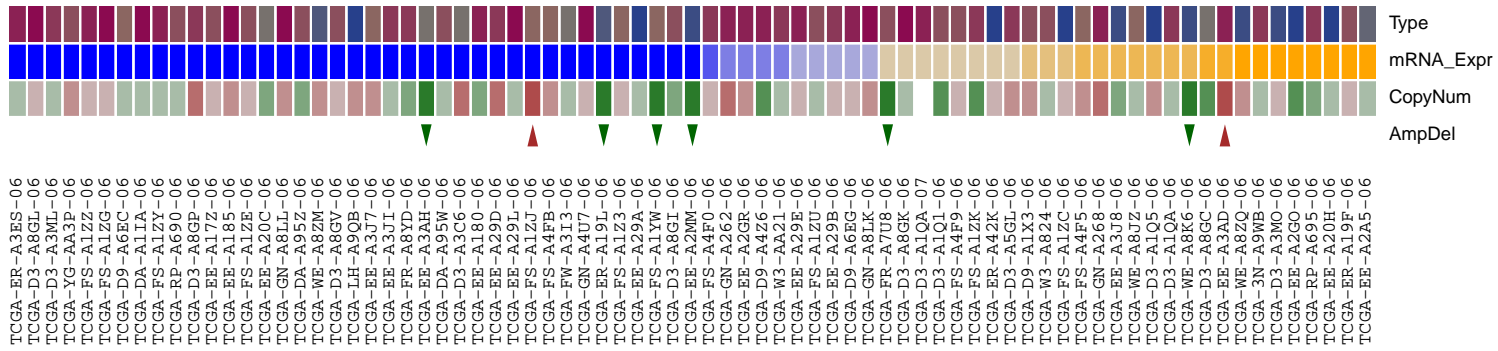

TCGA-ER-A3ES-06  
TCGA-D3-A8GL-06  
TCGA-D3-A3ML-06  
TCGA-YG-AA3P-06  
TCGA-FS-A1ZZ-06  
TCGA-FS-A1ZG-06  
TCGA-D9-A6EC-06  
TCGA-DA-A1IA-06  
TCGA-FS-A1ZY-06  
TCGA-RP-A690-06  
TCGA-D3-A8GP-06  
TCGA-EE-A17Z-06  
TCGA-EE-A185-06  
TCGA-FS-A1ZE-06  
TCGA-EE-A20C-06  
TCGA-GN-A8LJ-06  
TCGA-DA-A95Z-06  
TCGA-WE-A8ZM-06  
TCGA-D3-A8GV-06  
TCGA-LH-A9QB-06  
TCGA-EE-A3J7-06  
TCGA-EE-A3JL-06  
TCGA-FR-A8YD-06  
TCGA-DA-A3AH-06  
TCGA-D3-A3C6-06  
TCGA-EE-A180-06  
TCGA-EE-A29D-06  
TCGA-EE-A29L-06  
TCGA-FS-A1ZJ-06  
TCGA-FS-A4FB-06  
TCGA-FW-A3I3-06  
TCGA-GN-A4U7-06  
TCGA-ER-A19L-06  
TCGA-FS-A1Z3-06  
TCGA-EE-A29A-06  
TCGA-FS-A1YW-06  
TCGA-D3-A8GI-06  
TCGA-EE-A2MM-06  
TCGA-FS-A4F0-06  
TCGA-GN-A262-06  
TCGA-EE-A2GR-06  
TCGA-D9-A4Z6-06  
TCGA-W3-AA21-06  
TCGA-EE-A29E-06  
TCGA-FS-A1ZU-06  
TCGA-EE-A29B-06  
TCGA-D9-A6EG-06  
TCGA-GN-A8LK-06  
TCGA-ER-A7U8-06  
TCGA-D3-A8GK-06  
TCGA-D3-A1QA-07  
TCGA-D3-A1QI-06  
TCGA-FS-A4F9-06  
TCGA-FS-A1ZK-06  
TCGA-ER-A4ZK-06  
TCGA-D3-A5GL-06  
TCGA-D9-A1X3-06  
TCGA-W3-A824-06  
TCGA-FS-A1ZC-06  
TCGA-EE-A3J8-06  
TCGA-EE-A3J8-06  
TCGA-WE-A8JZ-06  
TCGA-D3-A1Q5-06  
TCGA-D3-A1QA-06  
TCGA-WE-A8K6-06  
TCGA-EE-A3AD-06  
TCGA-EE-A8ZQ-06  
TCGA-3N-A9WB-06  
TCGA-D3-A3MO-06  
TCGA-EE-A2GO-06  
TCGA-RP-A695-06  
TCGA-EE-A20H-06  
TCGA-ER-A19F-06  
TCGA-EE-A2A5-06

# LRIG1

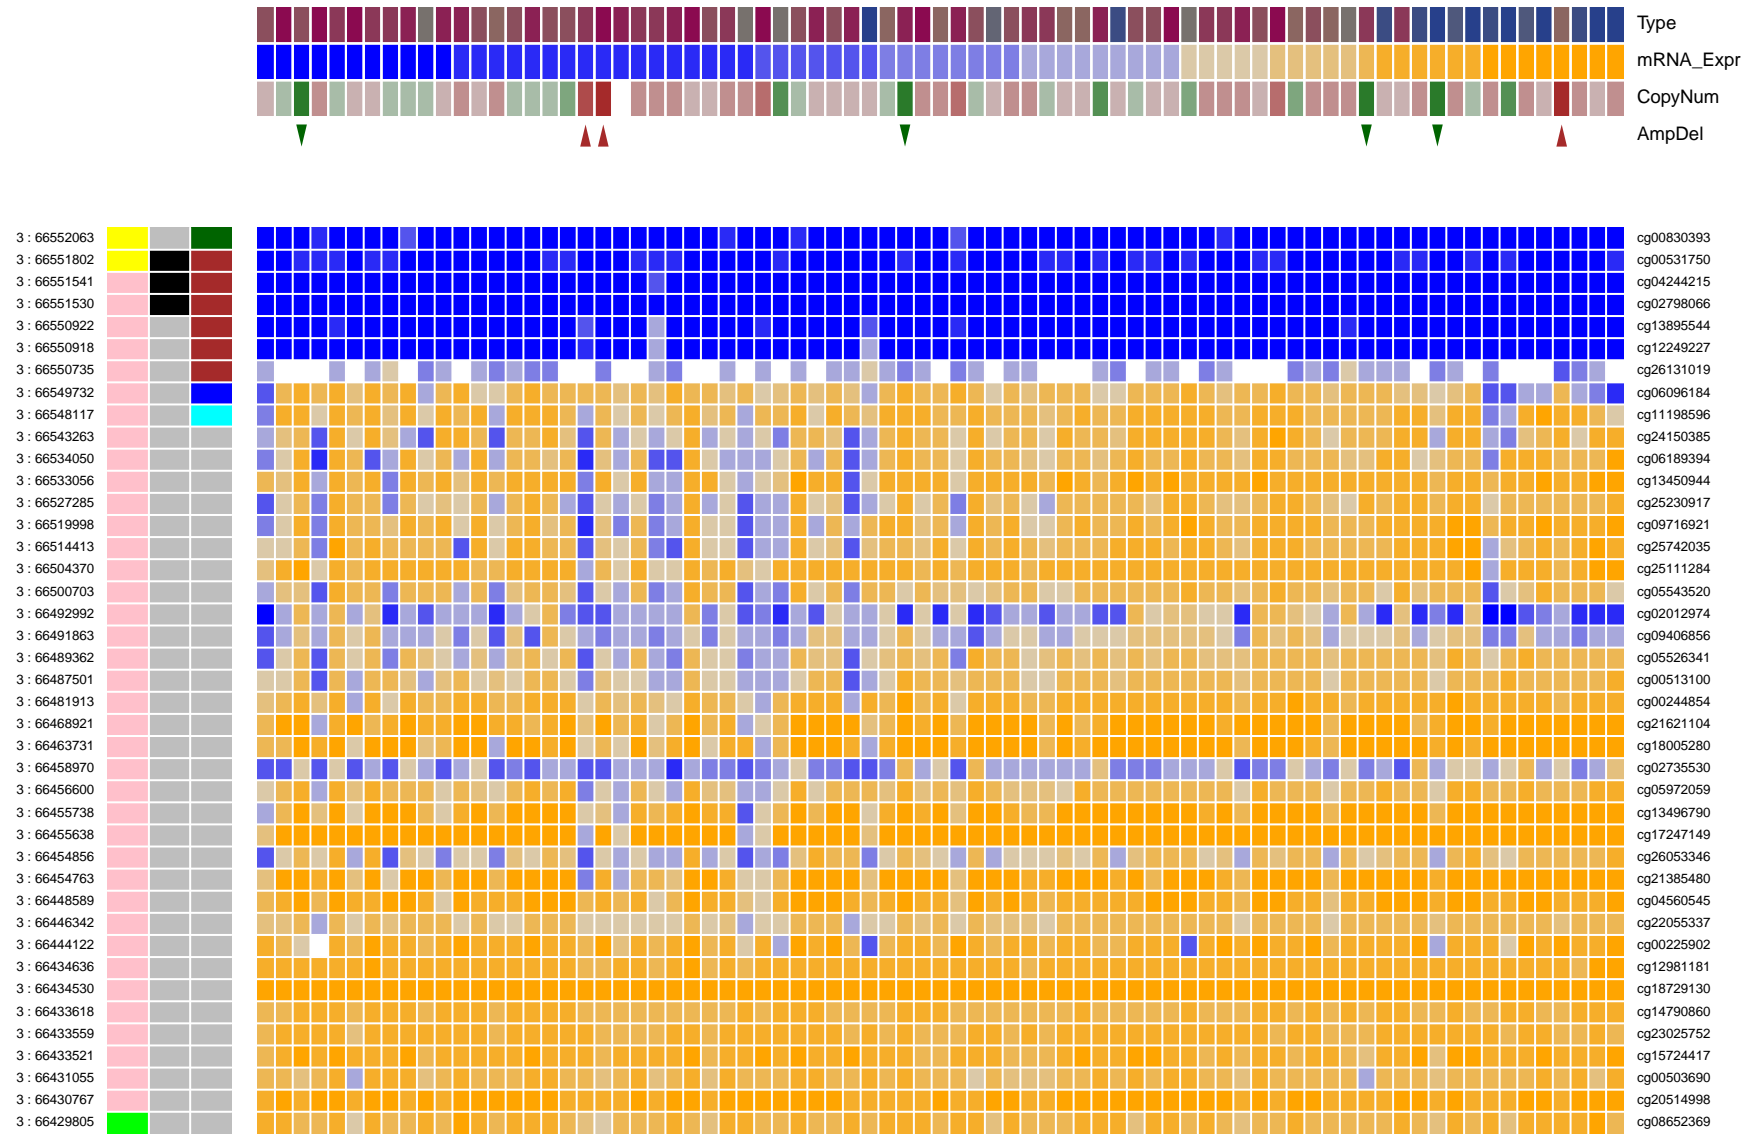

GeneLoc  
 PromoterAssoc  
 CpIsland

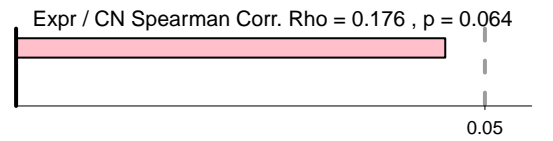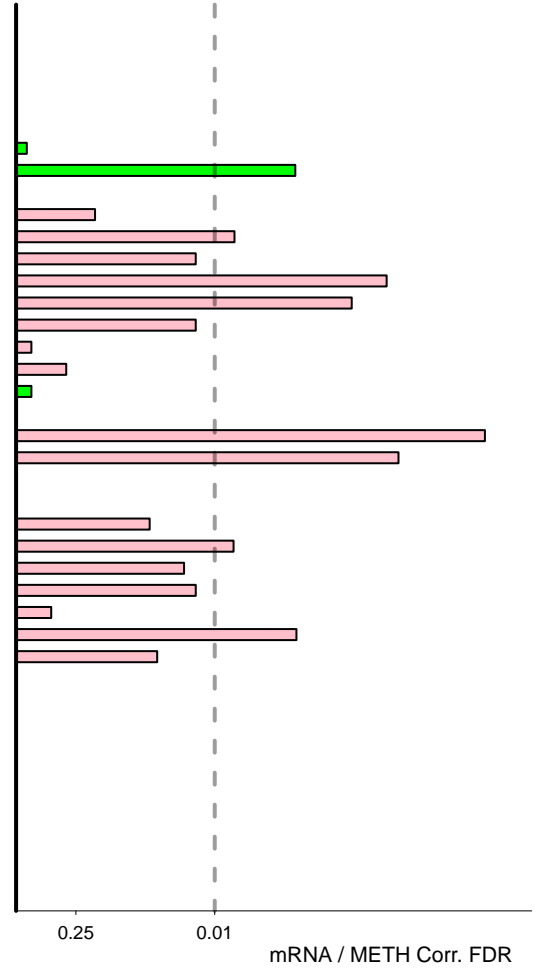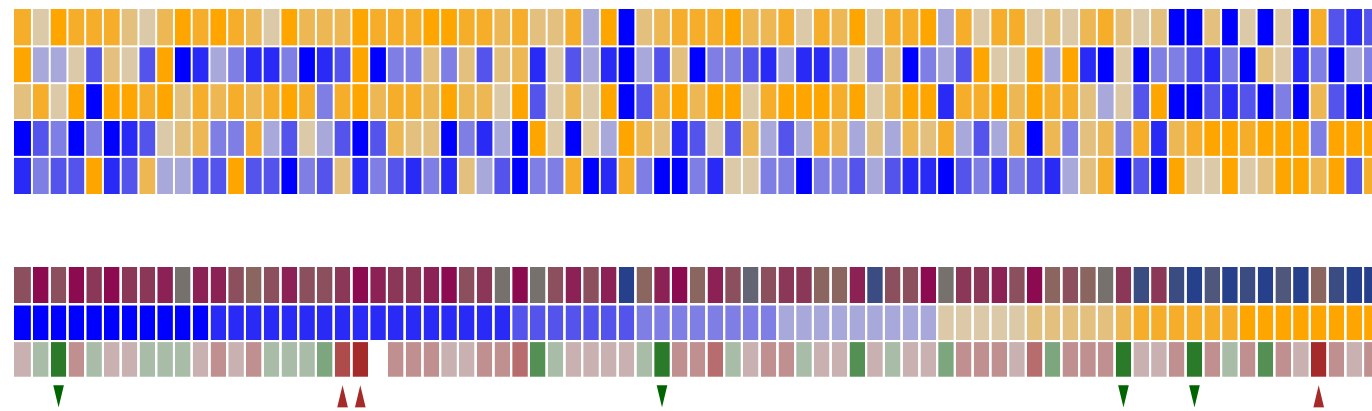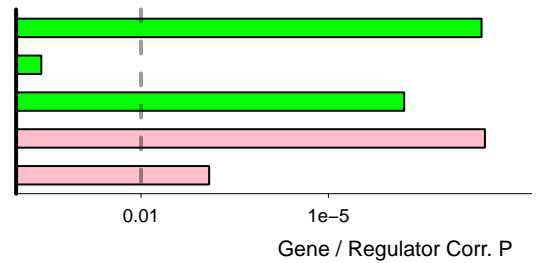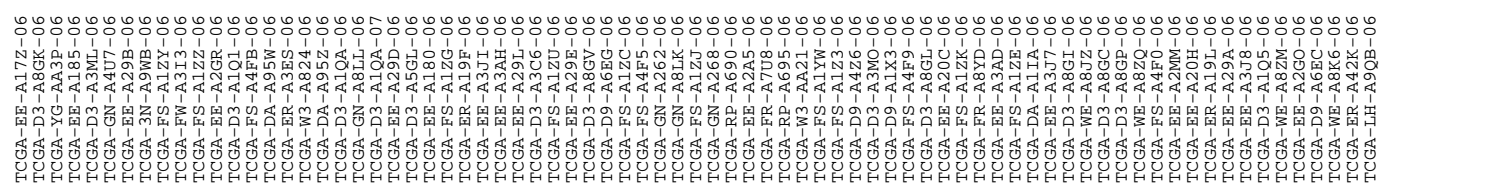

# SLC38A1

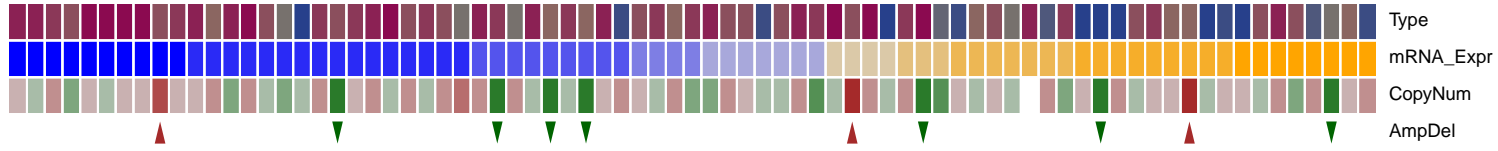

12:46664096  
12:46663694  
12:46663660  
12:46663407  
12:46663361  
12:46663281  
12:46663274  
12:46663270  
12:46662932  
12:46662743  
12:46662421  
12:46661718  
12:46661305  
12:46660819  
12:46660749  
12:46657338  
12:46637975  
12:46614854  
12:46609063  
12:46599935  
12:46599925  
12:46599923  
12:46581199  
12:46579352

GeneLoc  
PromoterAssoc  
CpGIsland

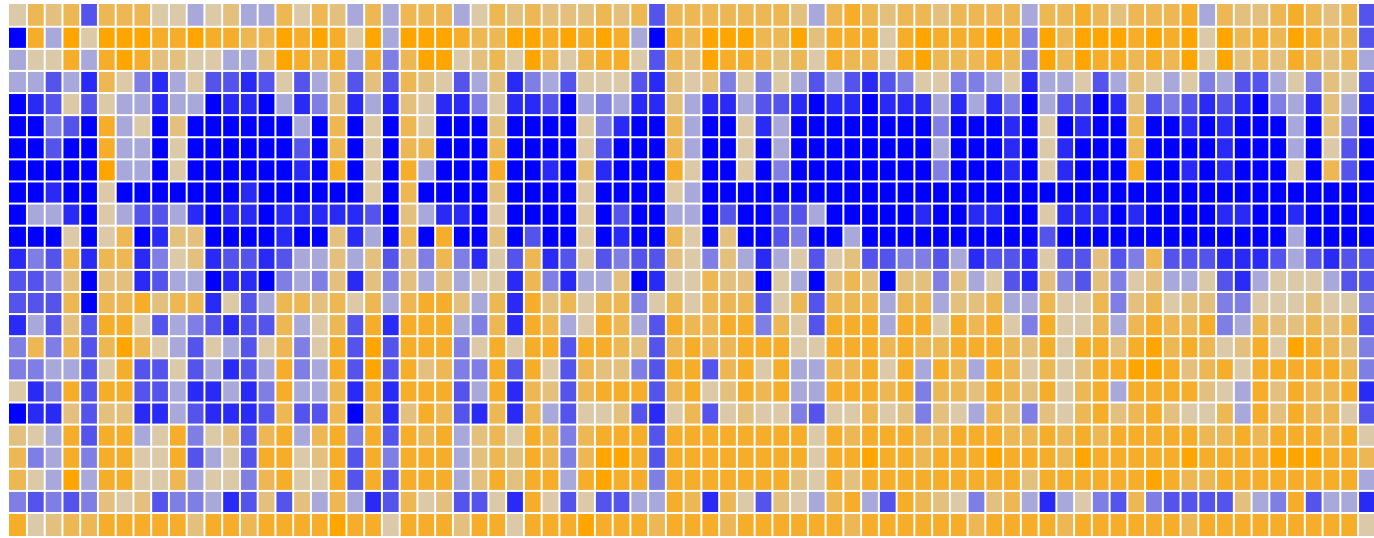

cg23031196  
cg17090968  
cg26018685  
cg05133578  
cg00906943  
cg24795297  
cg20463033  
cg09327770  
cg00472822  
cg16469386  
cg17726022  
cg26446449  
cg00808740  
cg02504521  
cg09325156  
cg15777028  
cg26069615  
cg00136822  
cg14673904  
cg23347835  
cg19585214  
cg07724015  
cg12494373  
cg13114824

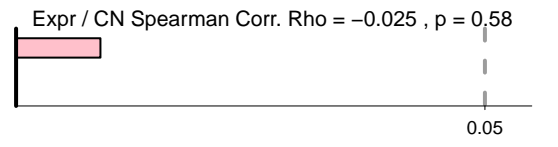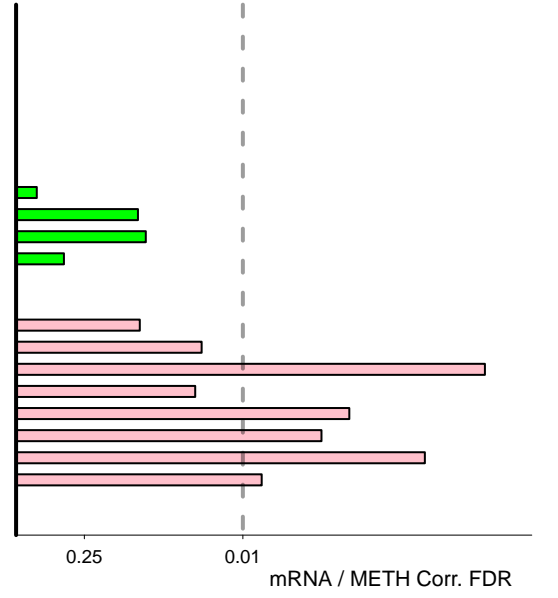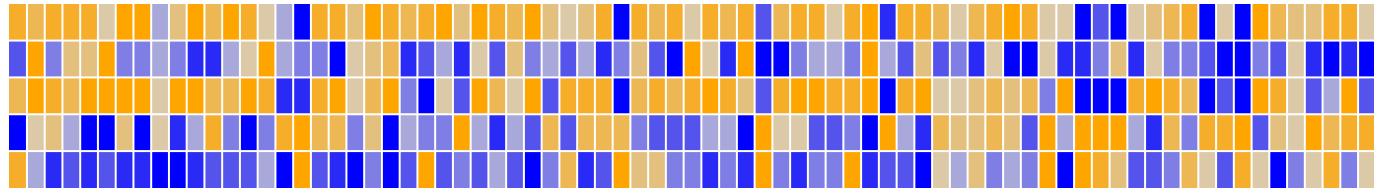

MITF  
SOX10  
TRPM1  
ZEB1  
AXL

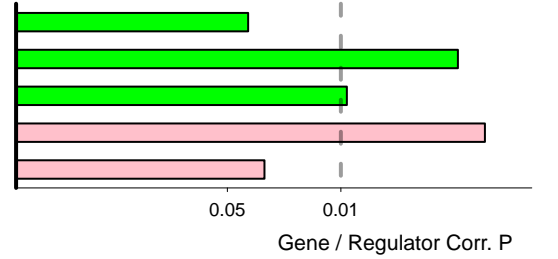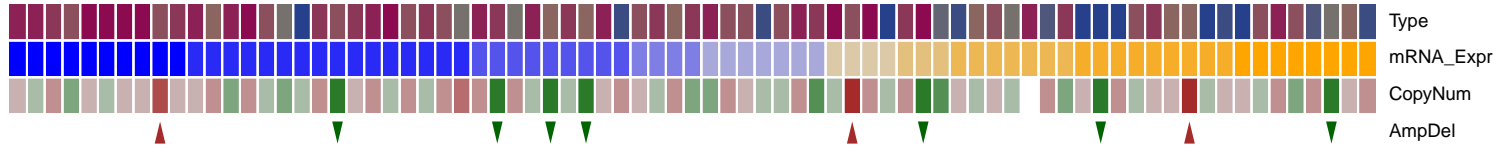

TCGA-EE-A29E-06  
TCGA-FS-A1ZY-06  
TCGA-D3-A5GL-06  
TCGA-D9-A1X3-06  
TCGA-GN-A4U7-06  
TCGA-DA-A1IA-06  
TCGA-D3-A8GL-06  
TCGA-FS-A1ZG-06  
TCGA-D3-A8GV-06  
TCGA-FS-A4F0-06  
TCGA-D9-A6EG-06  
TCGA-FS-A4FB-06  
TCGA-EE-A2GR-06  
TCGA-EE-A185-06  
TCGA-D3-A8CI-06  
TCGA-EE-A2OC-06  
TCGA-EE-A29A-06  
TCGA-EE-A29D-06  
TCGA-FS-A4F9-06  
TCGA-D3-A6GP-06  
TCGA-EE-A180-06  
TCGA-EE-A29L-06  
TCGA-DA-A95Z-06  
TCGA-D3-A3ML-06  
TCGA-YG-A3P-06  
TCGA-D3-A3C6-06  
TCGA-D9-A4Z6-06  
TCGA-EE-A3JI-06  
TCGA-EE-A3AH-06  
TCGA-ER-A3ES-06  
TCGA-FS-A4F5-06  
TCGA-3N-A9WB-06  
TCGA-EE-A3J7-06  
TCGA-FS-A1ZZ-06  
TCGA-EE-A2MM-06  
TCGA-ER-A19F-06  
TCGA-D3-A1QA-06  
TCGA-FS-A1ZJ-06  
TCGA-FR-A8YD-06  
TCGA-EE-A3AD-06  
TCGA-FR-A7U8-06  
TCGA-EE-A17Z-06  
TCGA-WE-A8K6-06  
TCGA-W3-A824-06  
TCGA-GN-A268-06  
TCGA-RP-A695-06  
TCGA-D3-A8GK-06  
TCGA-D3-A1O1-06  
TCGA-GN-A8LL-06  
TCGA-FS-A4ZK-06  
TCGA-FS-A1ZK-06  
TCGA-GN-A8LK-06  
TCGA-EE-A2A5-06  
TCGA-D3-A3M0-06  
TCGA-WE-A6JZ-06  
TCGA-FS-A1ZE-06  
TCGA-FW-A3I3-06  
TCGA-D3-A1QA-07  
TCGA-WE-A8ZM-06  
TCGA-W3-AA21-06  
TCGA-EE-A2GO-06  
TCGA-LH-A9QB-06  
TCGA-D3-A1Q5-06  
TCGA-DA-A95W-06  
TCGA-EE-A29B-06  
TCGA-FS-A1Z3-06  
TCGA-D9-A6EC-06  
TCGA-EE-A20H-06  
TCGA-WE-A8ZQ-06  
TCGA-FS-A1ZC-06  
TCGA-RP-A690-06  
TCGA-GN-A262-06  
TCGA-FS-A1ZU-06  
TCGA-ER-A19L-06  
TCGA-D3-A8GC-06  
TCGA-FS-A1YW-06  
TCGA-EE-A3J8-06



# CITED2

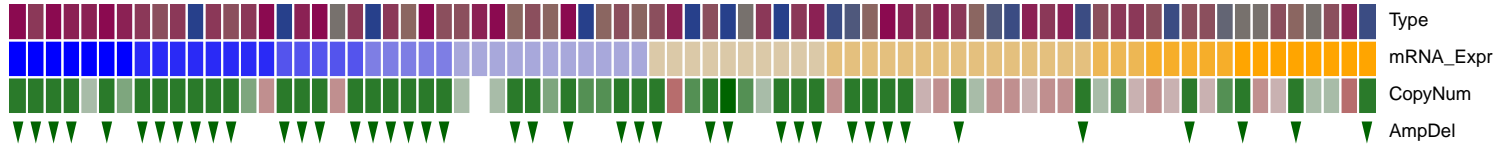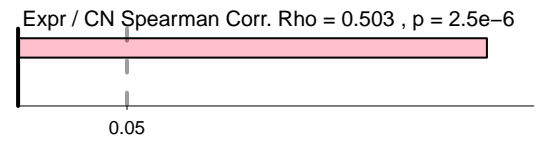

6 : 139697311  
 6 : 139697298  
 6 : 139697272  
 6 : 139697121  
 6 : 139697048  
 6 : 139696952  
 6 : 139696771  
 6 : 139696507  
 6 : 139696378  
 6 : 139696016  
 6 : 139695867  
 6 : 139695837  
 6 : 139695824  
 6 : 139695762  
 6 : 139695672  
 6 : 139695661  
 6 : 139695608  
 6 : 139695598  
 6 : 139695471  
 6 : 139695464  
 6 : 139695356  
 6 : 139695257  
 6 : 139695202  
 6 : 139694674  
 6 : 139694487  
 6 : 139694460  
 6 : 139694265

GeneLoc  
 PromoterAssoc  
 CpIsland

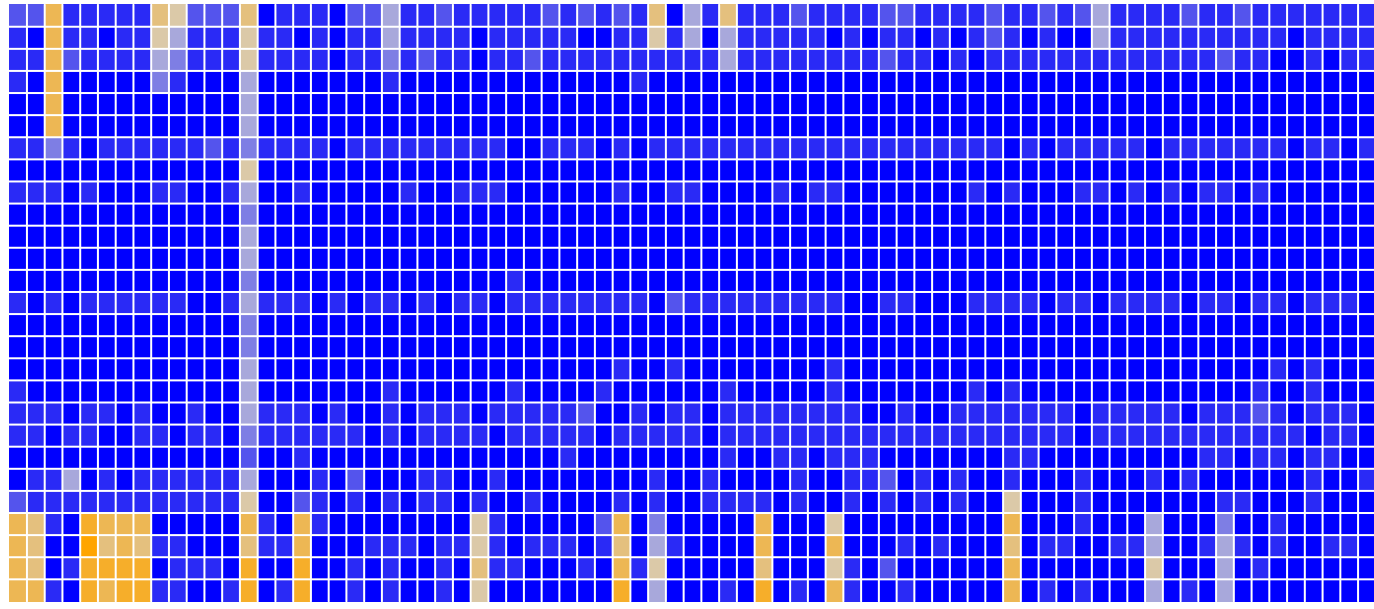

cg13309421  
 cg23867081  
 cg23010444  
 cg06449009  
 cg05732794  
 cg21186663  
 cg10433594  
 cg25703934  
 cg12082568  
 cg11347311  
 cg17583526  
 cg25791744  
 cg19566272  
 cg25722142  
 cg11125146  
 cg05607246  
 cg19456031  
 cg24462241  
 cg18451983  
 cg14925722  
 cg14021524  
 cg24211400  
 cg04186169  
 cg11468000  
 cg16636271  
 cg02595474  
 cg05383565

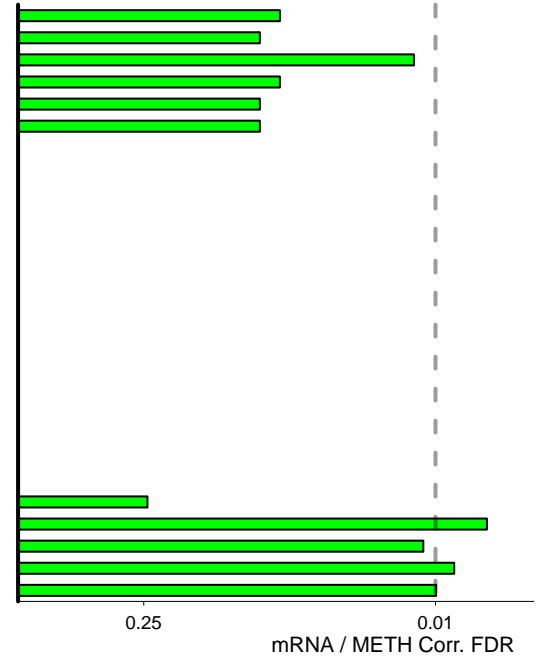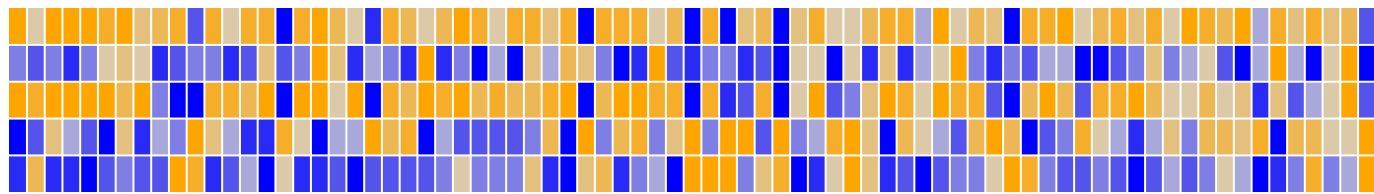

MITF  
 SOX10  
 TRPM1  
 ZEB1  
 AXL

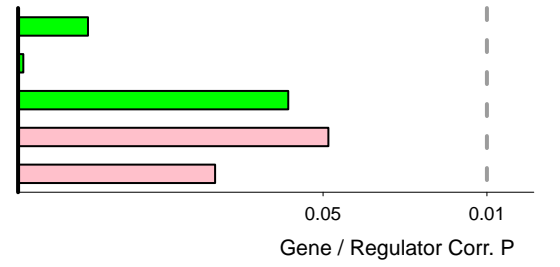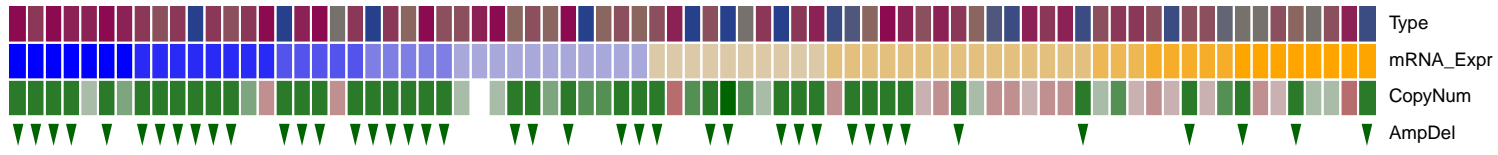

TCGA-FS-A1ZG-06  
 TCGA-3N-A9WB-06  
 TCGA-D3-A8GL-06  
 TCGA-D9-A6EG-06  
 TCGA-ER-A3ES-06  
 TCGA-EE-A185-06  
 TCGA-EE-A180-06  
 TCGA-EE-A29B-06  
 TCGA-DA-A95Z-06  
 TCGA-D3-A3ML-06  
 TCGA-LH-A90B-06  
 TCGA-D3-A5GL-06  
 TCGA-DA-A95W-06  
 TCGA-EE-A3J1-06  
 TCGA-CN-A8JK-06  
 TCGA-EE-A20H-06  
 TCGA-CN-A268-06  
 TCGA-CN-A8JL-06  
 TCGA-EE-A3AH-06  
 TCGA-W3-AAZ1-06  
 TCGA-ER-A4ZK-06  
 TCGA-EE-A29D-06  
 TCGA-FS-A4FB-06  
 TCGA-DA-A1IA-06  
 TCGA-FR-A7U8-06  
 TCGA-RP-A690-06  
 TCGA-D3-A1QA-07  
 TCGA-D3-A8GK-06  
 TCGA-FS-A1ZJ-06  
 TCGA-ER-A19F-06  
 TCGA-EE-A3J7-06  
 TCGA-EE-A29L-06  
 TCGA-D3-A1Q5-06  
 TCGA-D9-A6EC-06  
 TCGA-FS-A4F9-06  
 TCGA-FS-A1YW-06  
 TCGA-D3-A8GI-06  
 TCGA-CN-A262-06  
 TCGA-EE-A2G0-06  
 TCGA-D3-A1Q1-06  
 TCGA-EE-A29A-06  
 TCGA-D3-A3C6-06  
 TCGA-D3-A1QA-06  
 TCGA-FS-A1ZC-06  
 TCGA-D3-A8GP-06  
 TCGA-EE-A3RD-06  
 TCGA-EE-A3J8-06  
 TCGA-WE-A8ZM-06  
 TCGA-WE-A8ZJ-06  
 TCGA-CN-A4U7-06  
 TCGA-FS-A1ZV-06  
 TCGA-D3-A8GV-06  
 TCGA-D9-A4Z6-06  
 TCGA-FR-A8ID-06  
 TCGA-FS-A1Z3-06  
 TCGA-ER-A19L-06  
 TCGA-EE-A2MM-06  
 TCGA-EE-A29E-06  
 TCGA-RP-A695-06  
 TCGA-EE-A2GR-06  
 TCGA-WE-A8ZQ-06  
 TCGA-W3-A824-06  
 TCGA-FS-A1ZK-06  
 TCGA-FS-A4F0-06  
 TCGA-D3-A1X3-06  
 TCGA-D9-A3M0-06  
 TCGA-YG-AA3P-06  
 TCGA-FS-A1ZE-06  
 TCGA-EE-A2A5-06  
 TCGA-FW-A3I3-06  
 TCGA-EE-A20C-06  
 TCGA-EE-A17Z-06  
 TCGA-FS-A4F5-06  
 TCGA-D3-A8GC-06  
 TCGA-FS-A1ZU-06  
 TCGA-FS-A1ZY-06  
 TCGA-WE-A8K6-06

# PDE1C

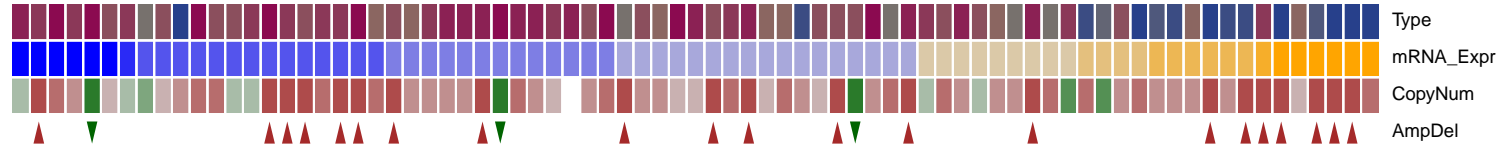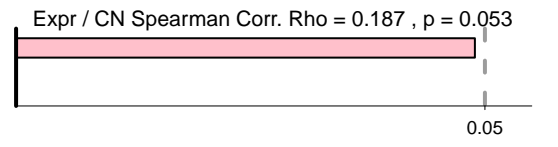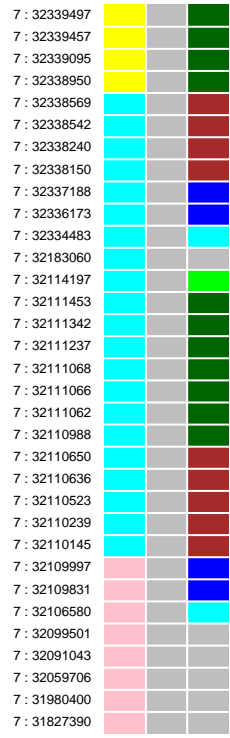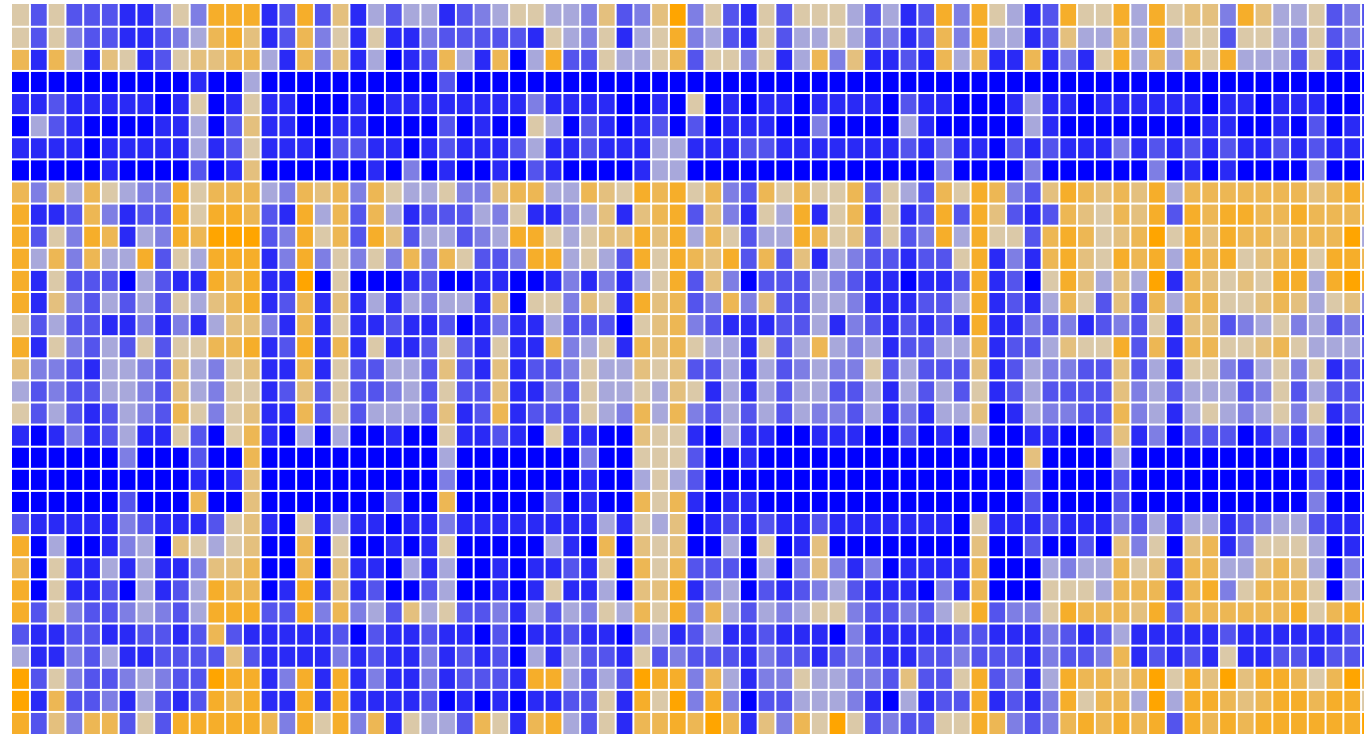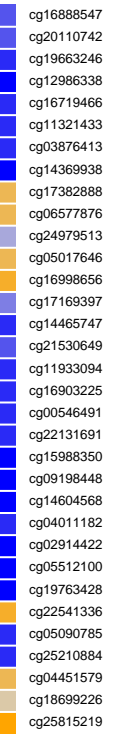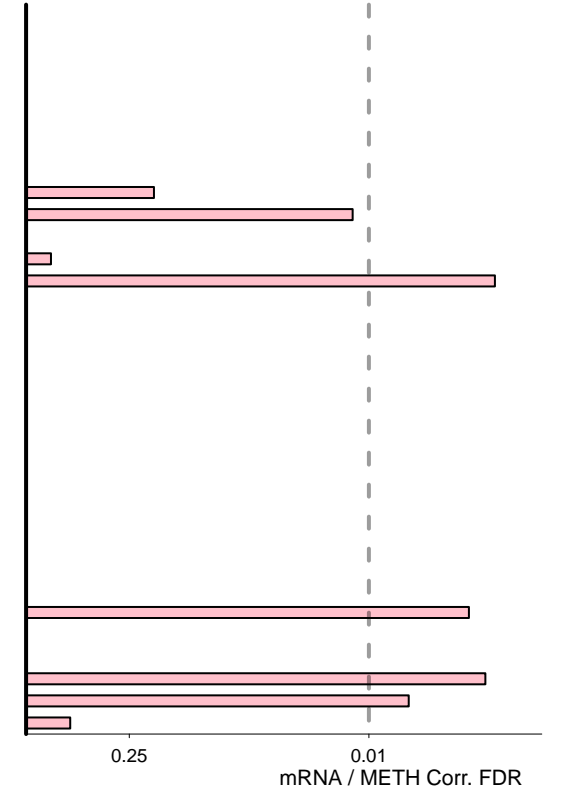

GeneLoc  
PromoterAssoc  
CpGIsland

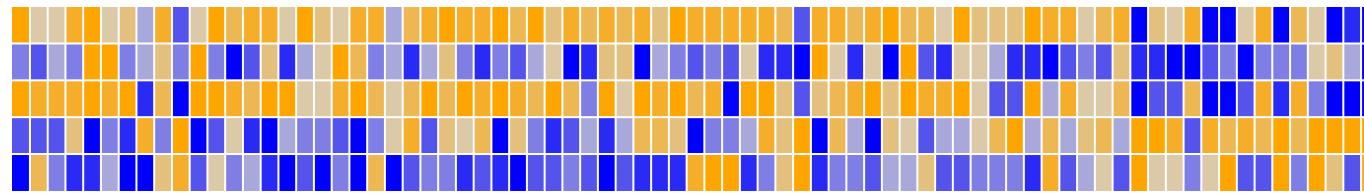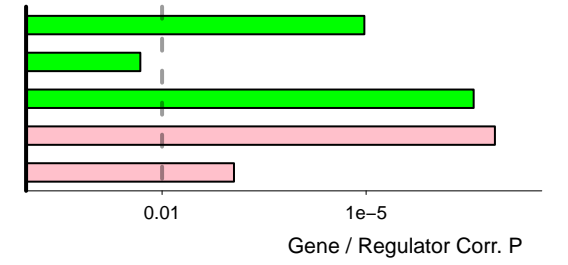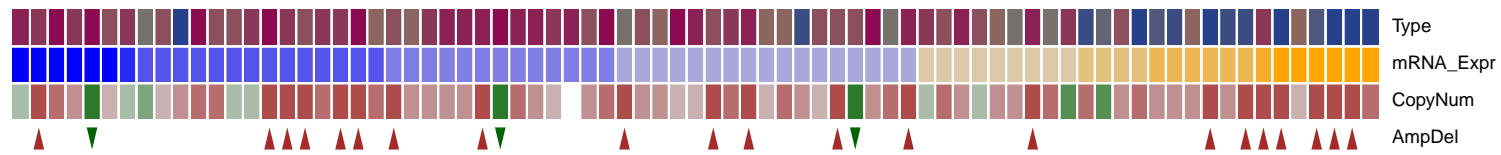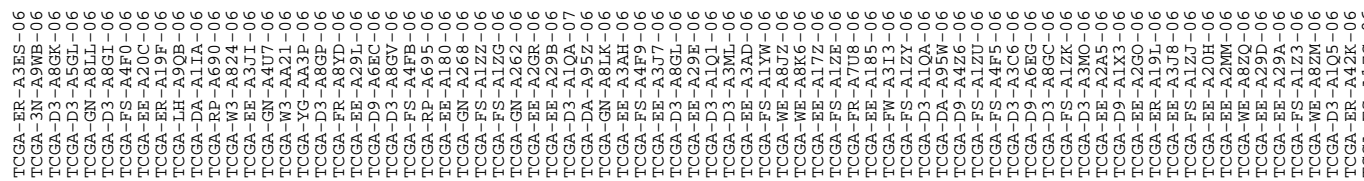

# CDH2

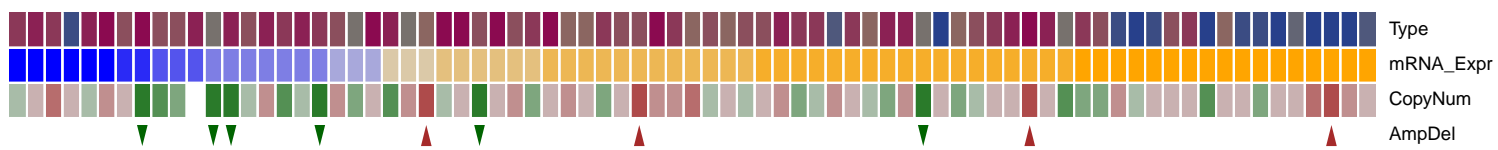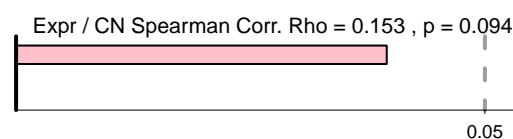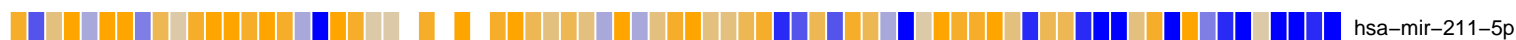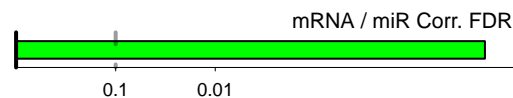

- 18 : 25758430
- 18 : 25758159
- 18 : 25757710
- 18 : 25757555
- 18 : 25757438
- 18 : 25757211
- 18 : 25757202
- 18 : 25756657
- 18 : 25756510
- 18 : 25756333
- 18 : 25755942
- 18 : 25755847
- 18 : 25755641
- 18 : 25755608
- 18 : 25754857
- 18 : 25754301
- 18 : 25572674
- 18 : 25572657
- 18 : 25572639
- 18 : 25570209
- 18 : 25570145

GeneLoc  
PromoterAssoc  
CpGIsland

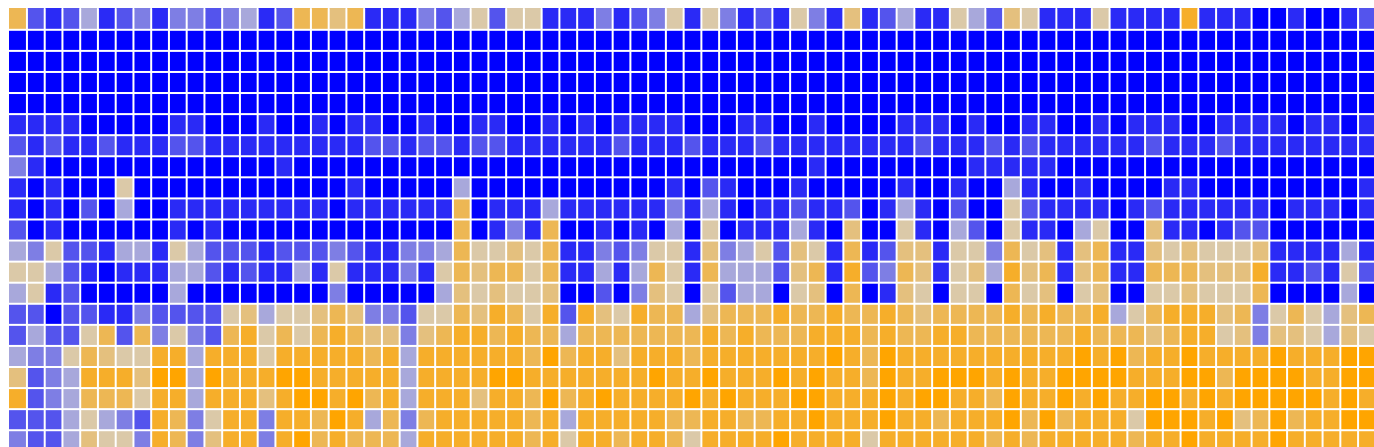

- cg12169536
- cg02840109
- cg14312538
- cg06090660
- cg12208258
- cg09313439
- cg13464915
- cg18171240
- cg22679003
- cg13845439
- cg07635747
- cg02935338
- cg15698842
- cg27593384
- cg22332722
- cg11963233
- cg13269527
- cg24776465
- cg07775293
- cg00964963
- cg27105619

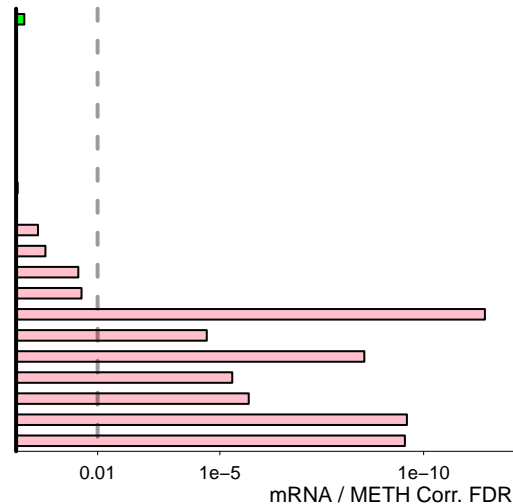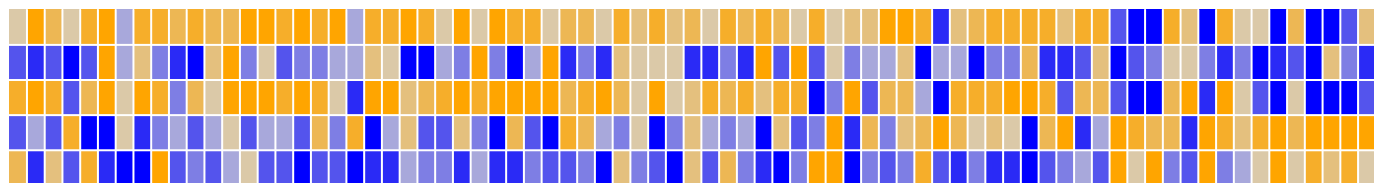

- MITF
- SOX10
- TRPM1
- ZEB1
- AXL

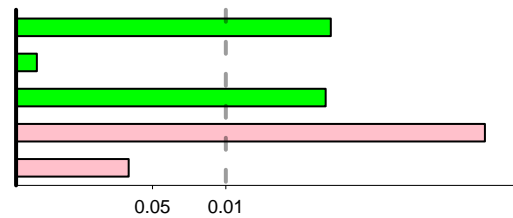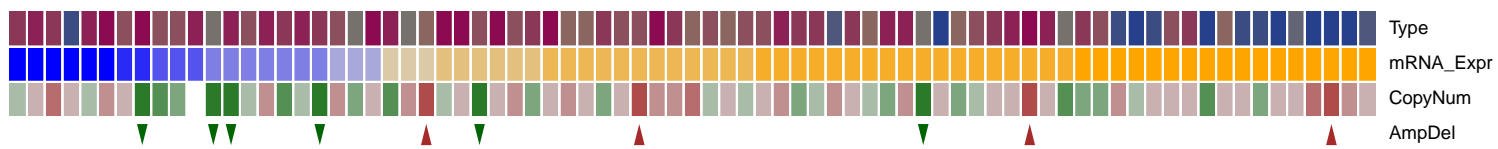

- TCGA-3N-A9WB-06
- TCGA-D9-A6EG-06
- TCGA-D3-A1QA-06
- TCGA-WE-A8ZQ-06
- TCGA-EE-A29E-06
- TCGA-GN-A8LL-06
- TCGA-D3-A8GV-06
- TCGA-GN-A8LK-06
- TCGA-D3-A1Q1-06
- TCGA-DA-A95Z-06
- TCGA-D3-A1QA-07
- TCGA-EE-A3RH-06
- TCGA-FS-A1ZY-06
- TCGA-RP-A690-06
- TCGA-D9-A4Z6-06
- TCGA-FS-A1ZK-06
- TCGA-ER-A3ES-06
- TCGA-EE-A29D-06
- TCGA-IG-AA3P-06
- TCGA-EE-A2UC-06
- TCGA-GN-A4U7-06
- TCGA-EE-A3AD-06
- TCGA-FW-A3I3-06
- TCGA-FS-A1ZJ-06
- TCGA-D3-A8GK-06
- TCGA-D3-A8GL-06
- TCGA-D3-A8GI-06
- TCGA-FS-A1ZG-06
- TCGA-FS-A4F9-06
- TCGA-RP-A695-06
- TCGA-DA-A1IA-06
- TCGA-FS-A4FB-06
- TCGA-FS-A1Z3-06
- TCGA-W3-AA21-06
- TCGA-ER-A19F-06
- TCGA-FS-A1ZU-06
- TCGA-EE-A185-06
- TCGA-D3-A8GP-06
- TCGA-WE-A8JZ-06
- TCGA-DA-A95W-06
- TCGA-D9-A6EC-06
- TCGA-FR-A7U8-06
- TCGA-EE-A17Z-06
- TCGA-GN-A26Z-06
- TCGA-FR-A8YD-06
- TCGA-D3-A3ML-06
- TCGA-WE-A8ZM-06
- TCGA-FS-A4F0-06
- TCGA-FS-A4F5-06
- TCGA-EE-A2GR-06
- TCGA-EE-A180-06
- TCGA-EE-A180-06
- TCGA-D3-A6SC-06
- TCGA-ER-A4ZK-06
- TCGA-EE-A3J7-06
- TCGA-W3-A8Z4-06
- TCGA-D3-A5GL-06
- TCGA-GN-A288-06
- TCGA-EE-A29L-06
- TCGA-FS-A1Z2-06
- TCGA-FS-A1Z2-06
- TCGA-D3-A3C6-06
- TCGA-EE-A3JI-06
- TCGA-D9-A1X3-06
- TCGA-WE-A8K6-06
- TCGA-EE-A20H-06
- TCGA-EE-A2NM-06
- TCGA-FS-A1ZE-06
- TCGA-EE-A29B-06
- TCGA-EE-A29A-06
- TCGA-FS-A1YW-06
- TCGA-D3-A3MO-06
- TCGA-EE-A3J8-06
- TCGA-EE-A2G0-06
- TCGA-EE-A2A5-06
- TCGA-FS-A1ZC-06
- TCGA-D3-A1O5-06
- TCGA-LH-A9QB-06
- TCGA-ER-A19L-06

- Type
- mRNA\_Expr
- CopyNum
- AmpDel

Gene / Regulator Corr. P

# RGS4

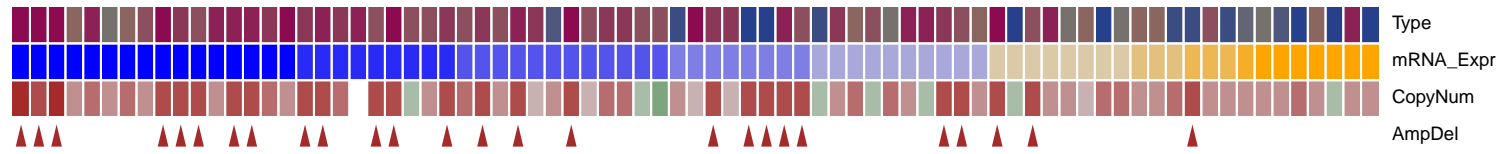

1 : 163037784  
 1 : 163038703  
 1 : 163039012  
 1 : 163039155  
 1 : 163039184  
 1 : 163041039  
 1 : 163041702  
 1 : 163044231  
 1 : 163046549

GeneLoc  
 PromoterAssoc  
 CpGIsland

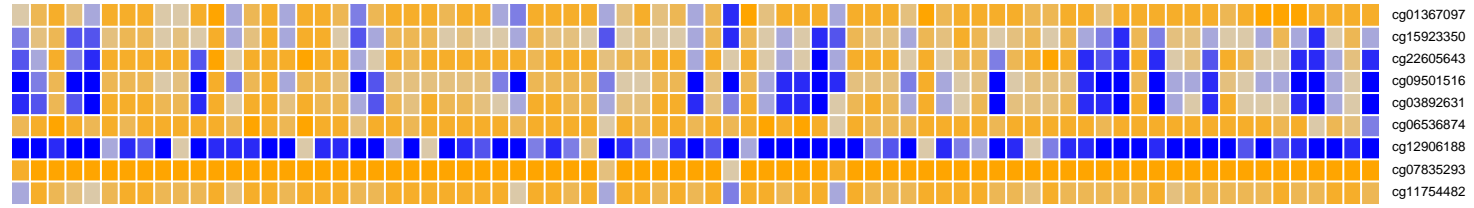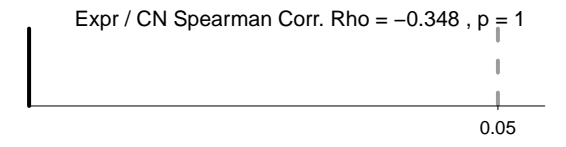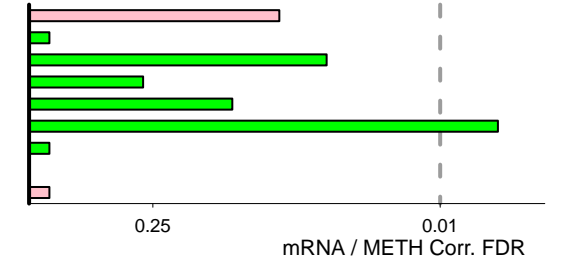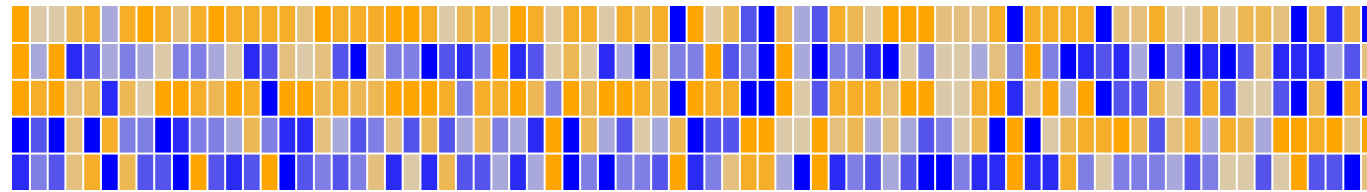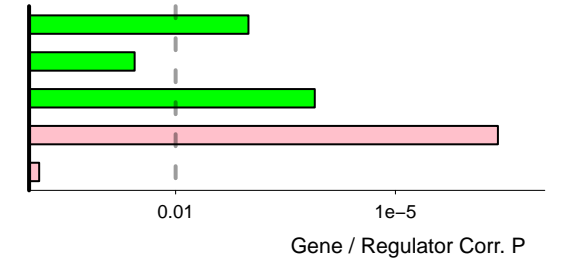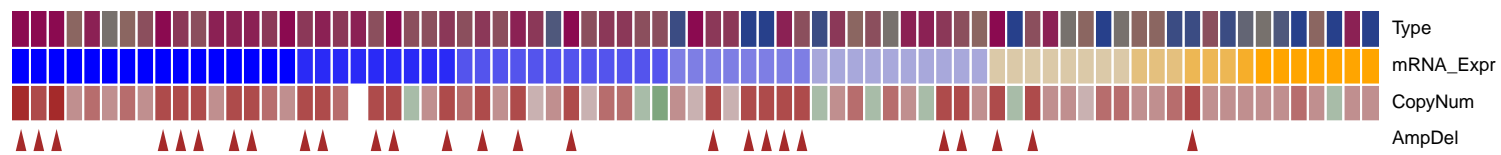

TCGA-GN-A8LL-06  
 TCGA-D3-A8GK-06  
 TCGA-DA-A1IA-06  
 TCGA-WE-A8JZ-06  
 TCGA-EE-A29E-06  
 TCGA-EE-A20C-06  
 TCGA-D9-A6EC-06  
 TCGA-YG-AA3P-06  
 TCGA-EE-A185-06  
 TCGA-FS-A4F0-06  
 TCGA-D3-A1O1-06  
 TCGA-EE-A2GF-06  
 TCGA-EE-A3AD-06  
 TCGA-FS-A1ZZ-06  
 TCGA-D3-A3ML-06  
 TCGA-GN-A8LK-06  
 TCGA-EE-A29B-06  
 TCGA-EE-A180-06  
 TCGA-FS-A1ZK-06  
 TCGA-ER-A19F-06  
 TCGA-D3-A8GL-06  
 TCGA-RP-A690-06  
 TCGA-FS-A4F9-06  
 TCGA-ZN-A9WB-06  
 TCGA-DA-A95Z-06  
 TCGA-EE-A29D-06  
 TCGA-D3-A8GI-06  
 TCGA-D9-A6EG-06  
 TCGA-EE-A3JI-06  
 TCGA-WE-A8ZN-06  
 TCGA-EE-A29L-06  
 TCGA-FS-A1ZE-06  
 TCGA-W3-AA21-06  
 TCGA-RP-A695-06  
 TCGA-W3-A824-06  
 TCGA-D9-A1X3-06  
 TCGA-EE-A2MM-06  
 TCGA-FS-A1ZG-06  
 TCGA-FR-A8YD-06  
 TCGA-D3-A1QA-06  
 TCGA-LH-A90B-06  
 TCGA-FS-A1ZC-06  
 TCGA-FS-A1ZY-06  
 TCGA-D3-A8GV-06  
 TCGA-WE-A8K6-06  
 TCGA-D3-A5GI-06  
 TCGA-FS-A1Z3-06  
 TCGA-DA-A95W-06  
 TCGA-FW-A3I8-06  
 TCGA-FS-A1Z6-06  
 TCGA-ER-A3ES-06  
 TCGA-D3-A8GF-06  
 TCGA-FS-A1ZU-06  
 TCGA-EE-A3J7-06  
 TCGA-GN-A4U7-06  
 TCGA-EE-A29A-06  
 TCGA-EE-A17Z-06  
 TCGA-GN-A268-06  
 TCGA-D3-A8GC-06  
 TCGA-FS-A1YW-06  
 TCGA-EE-A20H-06  
 TCGA-D3-A3C6-06  
 TCGA-FS-A4F5-06  
 TCGA-FS-A1ZJ-06  
 TCGA-D3-A3MO-06  
 TCGA-WE-A8ZQ-06  
 TCGA-FR-A7U8-06  
 TCGA-EE-A3J8-06  
 TCGA-EE-A2A5-06  
 TCGA-EE-A3AH-06  
 TCGA-ER-A19L-06  
 TCGA-EE-A2GO-06  
 TCGA-FS-A4FB-06  
 TCGA-ER-A42K-06  
 TCGA-GN-A262-06  
 TCGA-D3-A1Q5-06

# EHD2

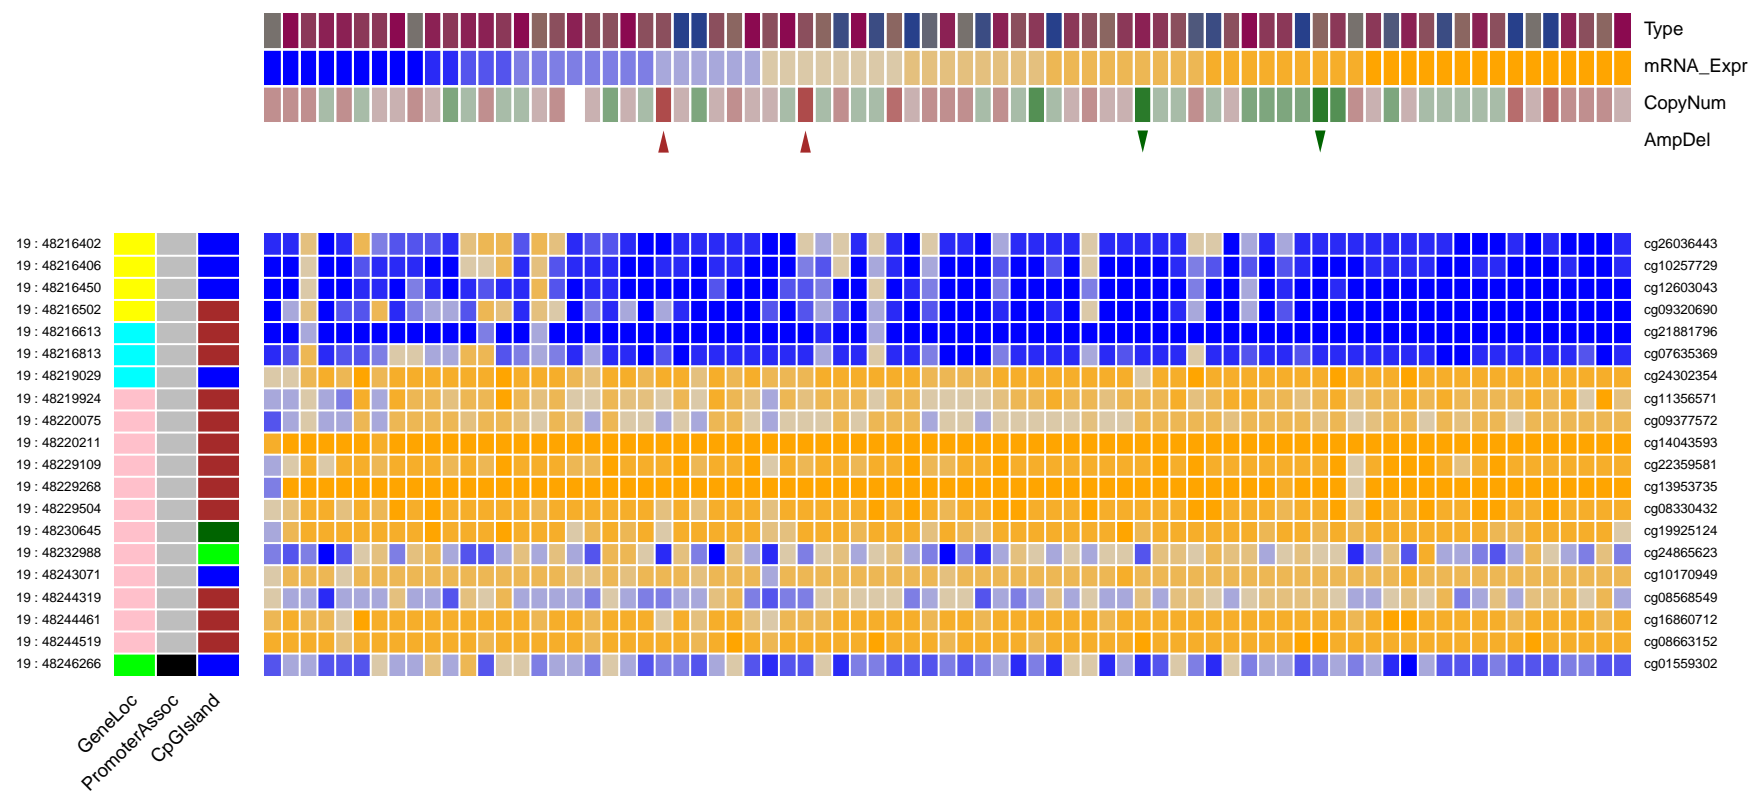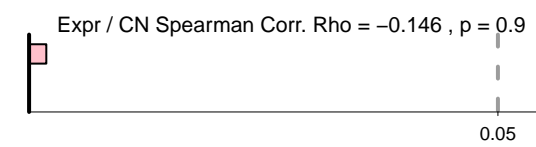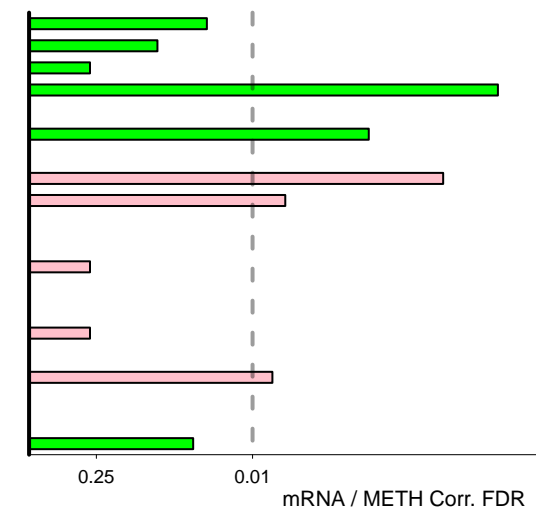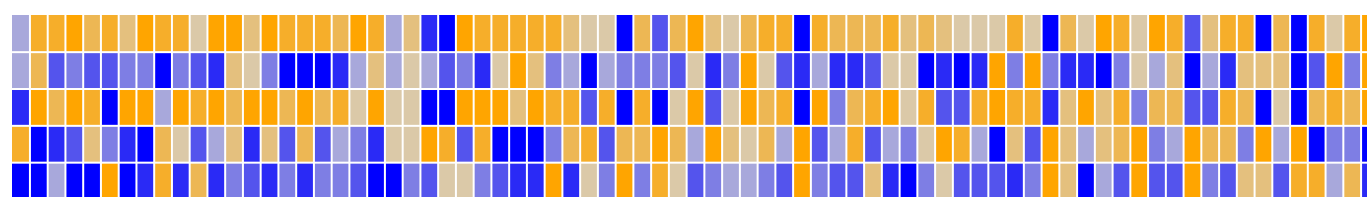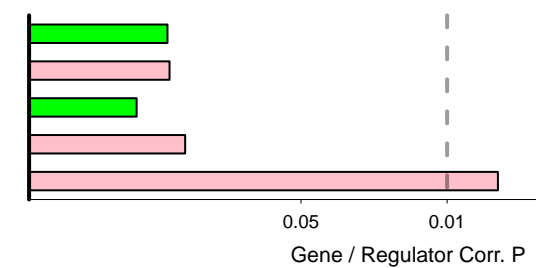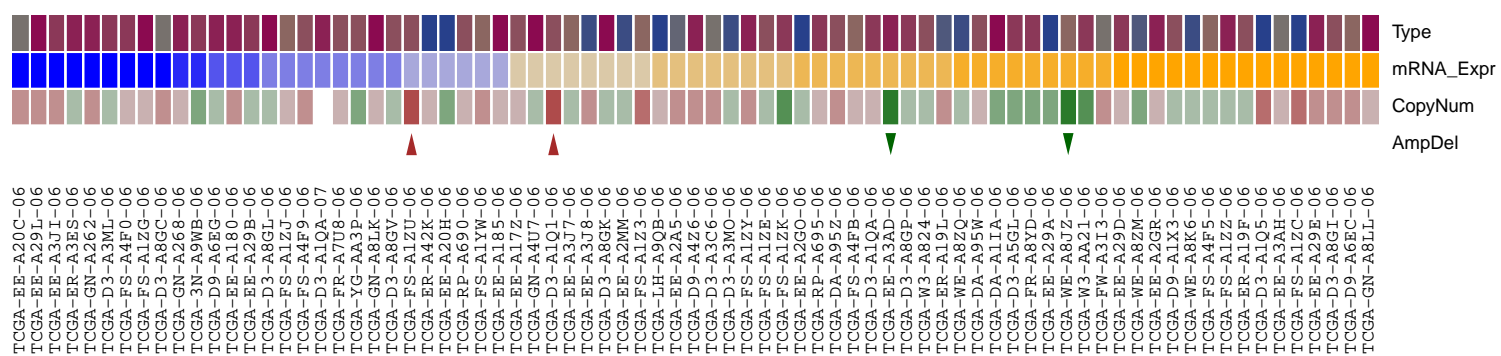

# COL12A1

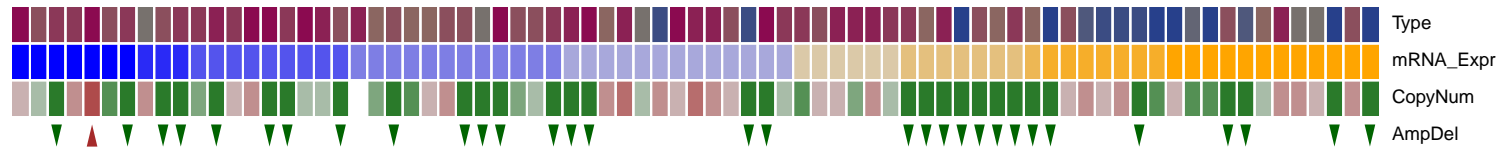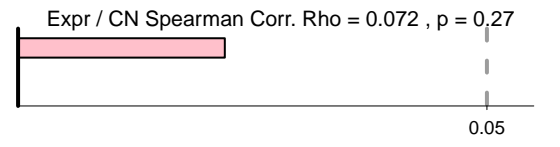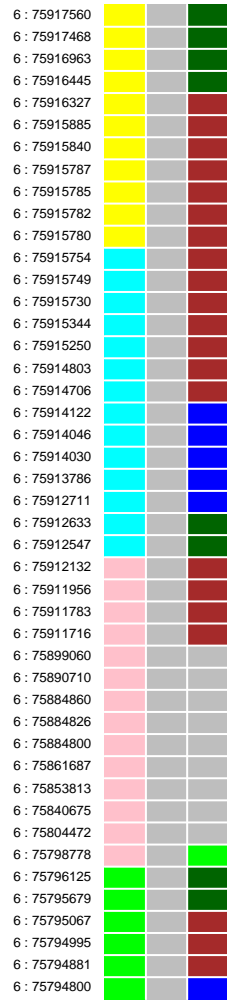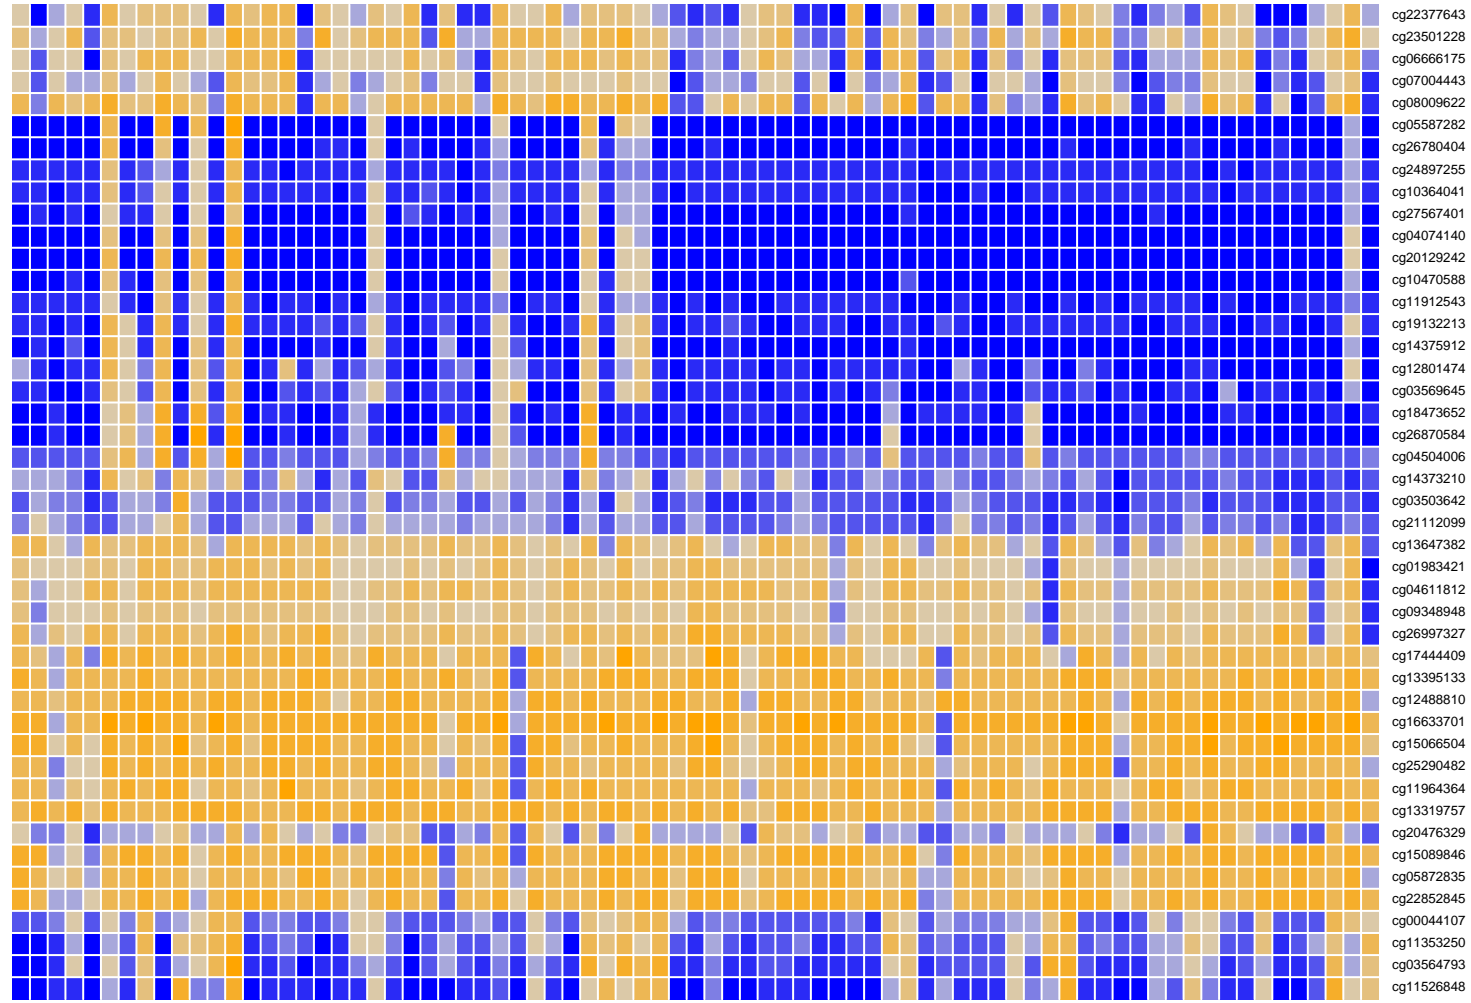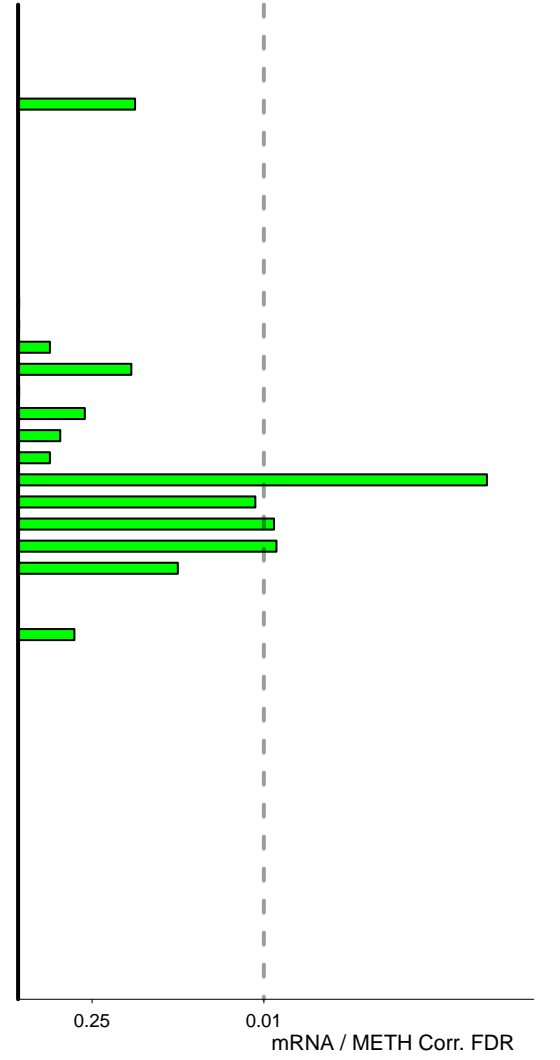

GeneLoc  
PromoterAssoc  
CpGIsland

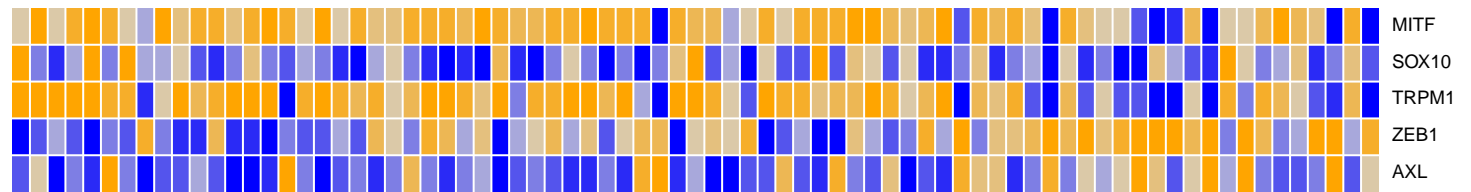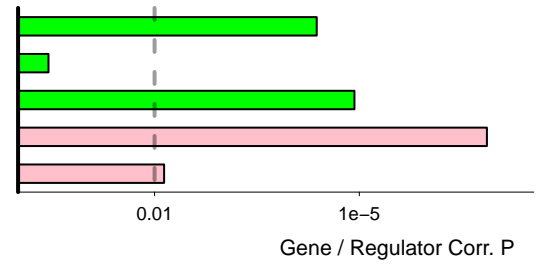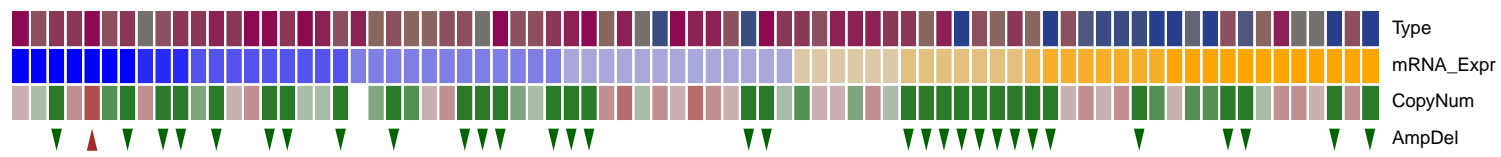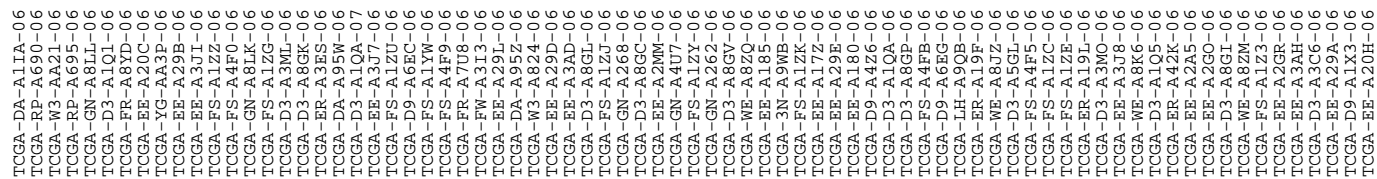

Gene / Regulator Corr. P

# MICAL2

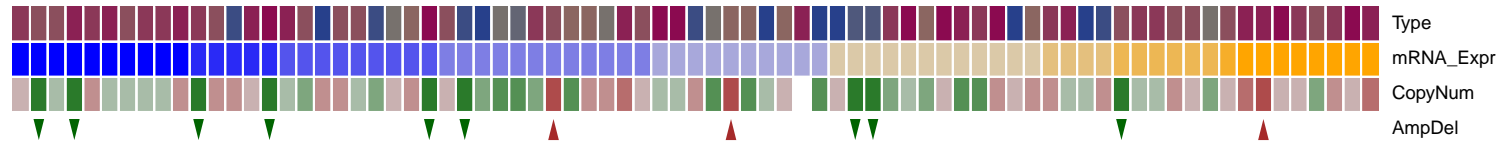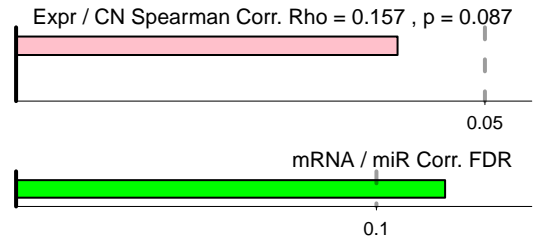

11 : 12124419  
11 : 12128203  
11 : 12131739  
11 : 12131814  
11 : 12131878  
11 : 12132460  
11 : 12132611  
11 : 12133015  
11 : 12133196  
11 : 12136405  
11 : 12140139  
11 : 12148288  
11 : 12159762  
11 : 12181467  
11 : 12183446  
11 : 12187606  
11 : 12188996  
11 : 12200844  
11 : 12207449  
11 : 12214804  
11 : 12222570  
11 : 12228521  
11 : 12244827  
11 : 12252002  
11 : 12255685  
11 : 12263892  
11 : 12270286  
11 : 12271701  
11 : 12279778

GeneLoc  
PromoterAssoc  
CpGIsland

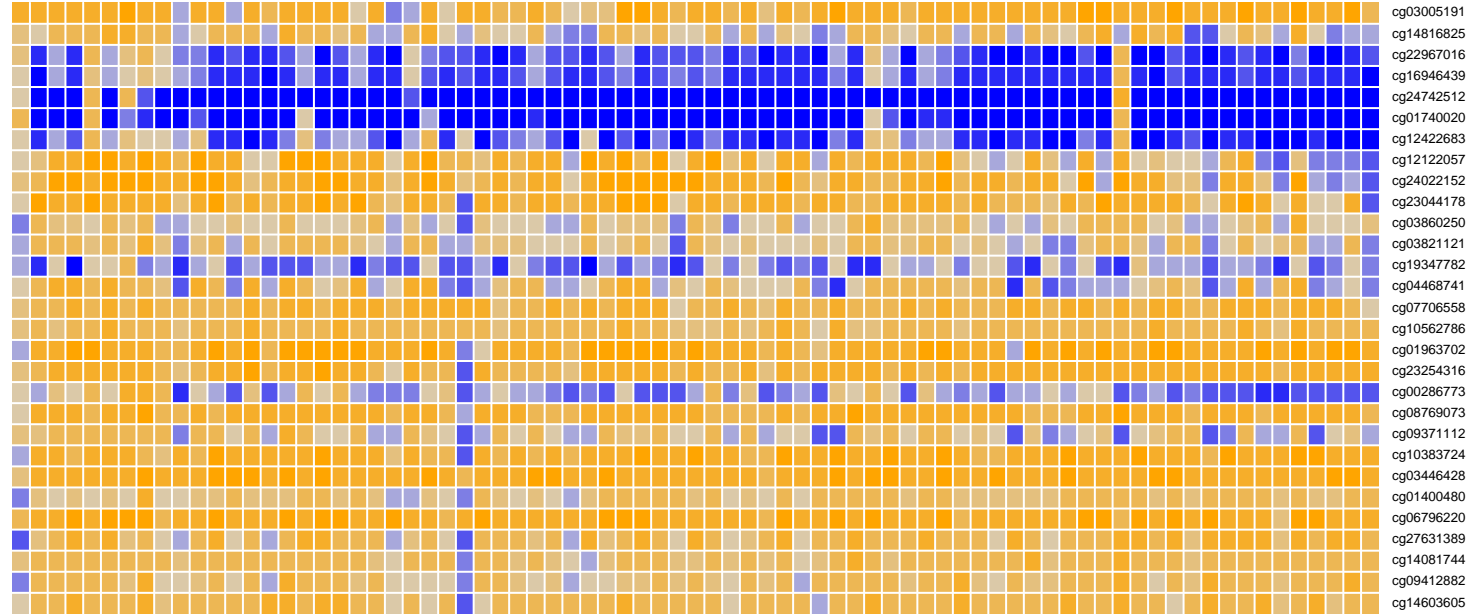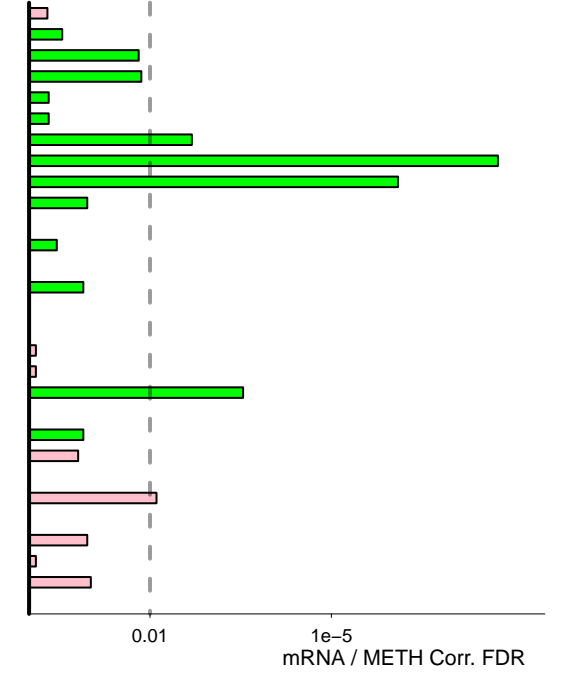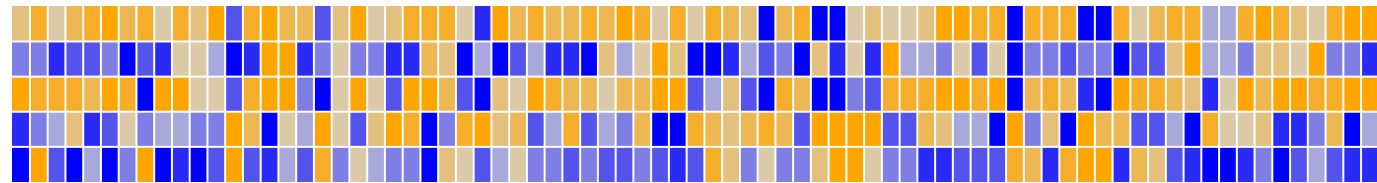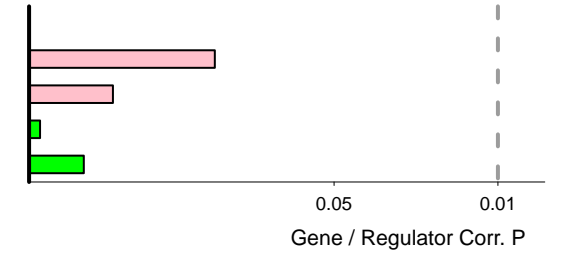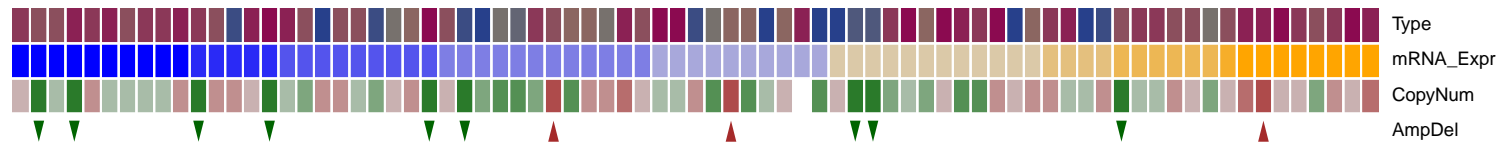

TCGA-FS-A4F0-06  
TCGA-D3-A1Q1-06  
TCGA-DA-A95W-06  
TCGA-GN-A262-06  
TCGA-EE-A3JI-06  
TCGA-ER-A3ES-06  
TCGA-W3-A824-06  
TCGA-D3-A3ML-06  
TCGA-W3-AA21-06  
TCGA-EE-A3AD-06  
TCGA-D3-A8GP-06  
TCGA-YG-AA3P-06  
TCGA-WE-A8K6-06  
TCGA-FS-A1Z2-06  
TCGA-GN-A81L-06  
TCGA-FS-A1Z1-06  
TCGA-DA-A95Z-06  
TCGA-IH-A90B-06  
TCGA-FS-A1Z0-06  
TCGA-RP-A690-06  
TCGA-D3-A3M0-06  
TCGA-D3-A3C6-06  
TCGA-FS-A1YX-06  
TCGA-EE-A29L-06  
TCGA-ER-A19F-06  
TCGA-EE-A3J8-06  
TCGA-ER-A42K-06  
TCGA-FW-A3I3-06  
TCGA-EE-A2A5-06  
TCGA-RP-A695-06  
TCGA-FR-A7U8-06  
TCGA-FS-A4FB-06  
TCGA-FS-A1ZJ-06  
TCGA-EE-A3AH-06  
TCGA-EE-A2GR-06  
TCGA-FS-A1ZE-06  
TCGA-DA-A1IA-06  
TCGA-GN-A4U7-06  
TCGA-WE-A8ZQ-06  
TCGA-D3-A8GC-06  
TCGA-WE-A8JZ-06  
TCGA-FS-A4F5-06  
TCGA-EE-A20H-06  
TCGA-FS-A1Z3-06  
TCGA-D3-A1QA-07  
TCGA-D3-A1Q5-06  
TCGA-EE-A2G0-06  
TCGA-WE-A8ZM-06  
TCGA-FR-A19I-06  
TCGA-FR-A8YD-06  
TCGA-D3-A8KX-06  
TCGA-EE-A3J7-06  
TCGA-D3-A8GL-06  
TCGA-D9-A4Z6-06  
TCGA-FS-A1ZK-06  
TCGA-EE-A185-06  
TCGA-FS-A1ZC-06  
TCGA-D9-A6EC-06  
TCGA-D3-A5GL-06  
TCGA-EE-A29E-06  
TCGA-EE-A29A-06  
TCGA-EE-A2MM-06  
TCGA-FS-A4F9-06  
TCGA-3N-A9WB-06  
TCGA-D3-A1QA-06  
TCGA-D9-A1X3-06  
TCGA-EE-A172-06  
TCGA-EE-A20C-06  
TCGA-D3-A8GV-06  
TCGA-GN-A268-06  
TCGA-EE-A180-06  
TCGA-GN-A8LK-06  
TCGA-EE-A29B-06  
TCGA-D3-A8G1-06  
TCGA-EE-A29D-06  
TCGA-FS-A1ZG-06  
TCGA-D9-A6EG-06

# ERRF1

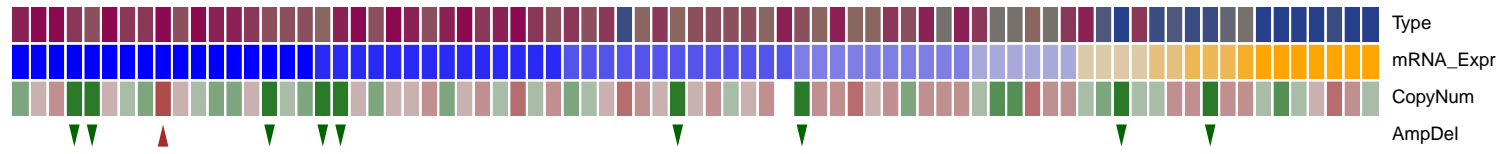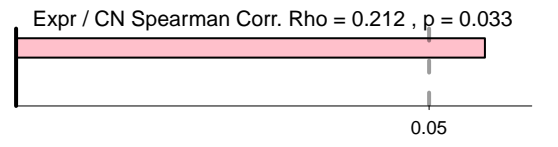

- 1: 8087590
- 1: 8087518
- 1: 8087421
- 1: 8086776
- 1: 8086721
- 1: 8086588
- 1: 8086308
- 1: 8085795
- 1: 8085701
- 1: 8085641
- 1: 8085604
- 1: 8085193
- 1: 8083892
- 1: 8078652
- 1: 8076599
- 1: 8075137
- 1: 8073906
- 1: 8072453
- 1: 8065039

GeneLoc  
PromoterAssoc  
CpGIsland

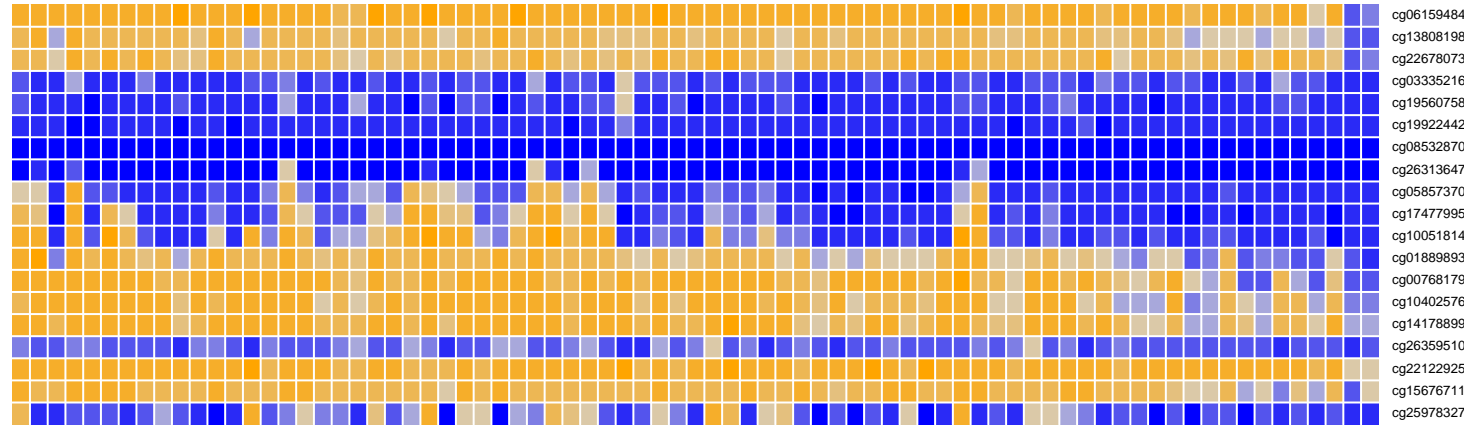

- cg06159484
- cg13808198
- cg22678073
- cg03335216
- cg19560758
- cg19922442
- cg08532870
- cg26313647
- cg05857370
- cg17477995
- cg10051814
- cg01889893
- cg00768179
- cg10402576
- cg14178899
- cg26359510
- cg22122925
- cg15676711
- cg25978327

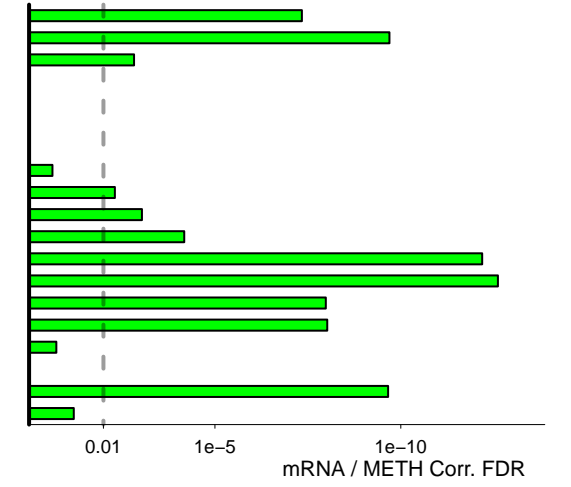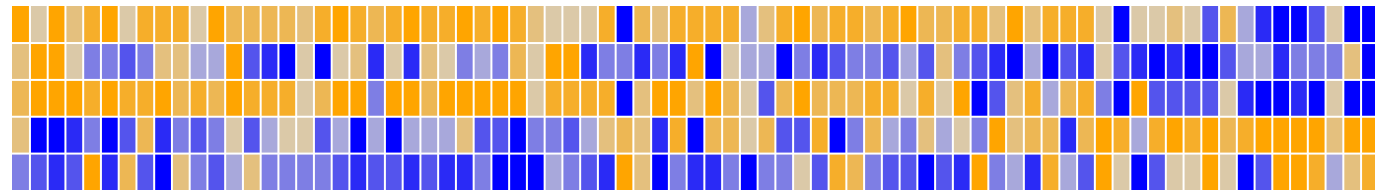

- MITF
- SOX10
- TRPM1
- ZEB1
- AXL

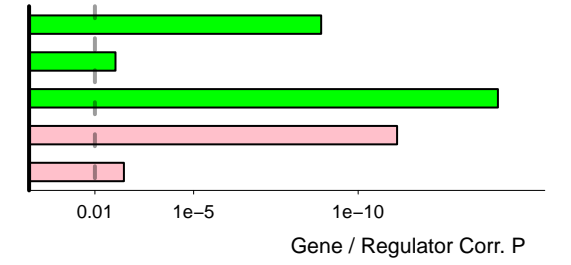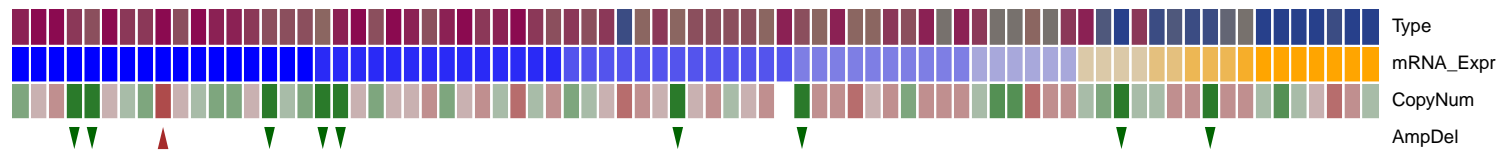

- TCGA-EE-A180-06
- TCGA-DA-A11A-06
- TCGA-GN-A8LL-06
- TCGA-EE-A29B-06
- TCGA-D3-A1Q1-06
- TCGA-FS-A1ZG-06
- TCGA-3N-A9WB-06
- TCGA-EE-A29D-06
- TCGA-GN-A8LK-06
- TCGA-RR-A19F-06
- TCGA-D3-A8GF-06
- TCGA-EE-A2GF-06
- TCGA-FS-A1ZY-06
- TCGA-D3-A1QA-06
- TCGA-EE-A7U8-06
- TCGA-EE-A82A-06
- TCGA-FS-A1ZU-06
- TCGA-D3-A1ZV-06
- TCGA-GN-A4U7-06
- TCGA-DA-A95Z-06
- TCGA-EE-A185-06
- TCGA-D9-A6EG-06
- TCGA-D9-A1X3-06
- TCGA-EE-A3AD-06
- TCGA-D3-A8GL-06
- TCGA-RP-A695-06
- TCGA-EE-A3ES-06
- TCGA-EE-A29L-06
- TCGA-D3-A8GF-06
- TCGA-D3-A8GI-06
- TCGA-RR-A8YD-06
- TCGA-DA-A95W-06
- TCGA-D3-A5GL-06
- TCGA-EE-A2MM-06
- TCGA-WE-A8JZ-06
- TCGA-FS-A4FO-06
- TCGA-FS-A1YW-06
- TCGA-EE-A17Z-06
- TCGA-FS-A4F9-06
- TCGA-FS-A1ZE-06
- TCGA-D3-A8GV-06
- TCGA-FS-A4F5-06
- TCGA-D3-A1QA-07
- TCGA-RP-A690-06
- TCGA-EE-A4FB-06
- TCGA-EE-A29E-06
- TCGA-D9-A6EC-06
- TCGA-FS-A1Z3-06
- TCGA-FS-A1ZK-06
- TCGA-FC-A1Z5-06
- TCGA-GN-A26Z-06
- TCGA-EE-A3AH-06
- TCGA-EE-A268-06
- TCGA-D3-A3ML-06
- TCGA-D3-A3C6-06
- TCGA-FW-A3I3-06
- TCGA-EE-A3J7-06
- TCGA-D3-A8GC-06
- TCGA-EE-A3J1-06
- TCGA-FS-A1ZZ-06
- TCGA-WE-A8ZN-06
- TCGA-EE-A20H-06
- TCGA-W3-AA21-06
- TCGA-WE-A8ZQ-06
- TCGA-EE-A191-06
- TCGA-EE-A3J8-06
- TCGA-WE-A8K6-06
- TCGA-EE-A2A5-06
- TCGA-EE-A20C-06
- TCGA-EE-A42K-06
- TCGA-EE-A2GO-06
- TCGA-EE-A29A-06
- TCGA-LH-A9OB-06
- TCGA-D3-A3MO-06
- TCGA-D3-A1Q5-06
- TCGA-FS-A1ZC-06



# SLC14A1

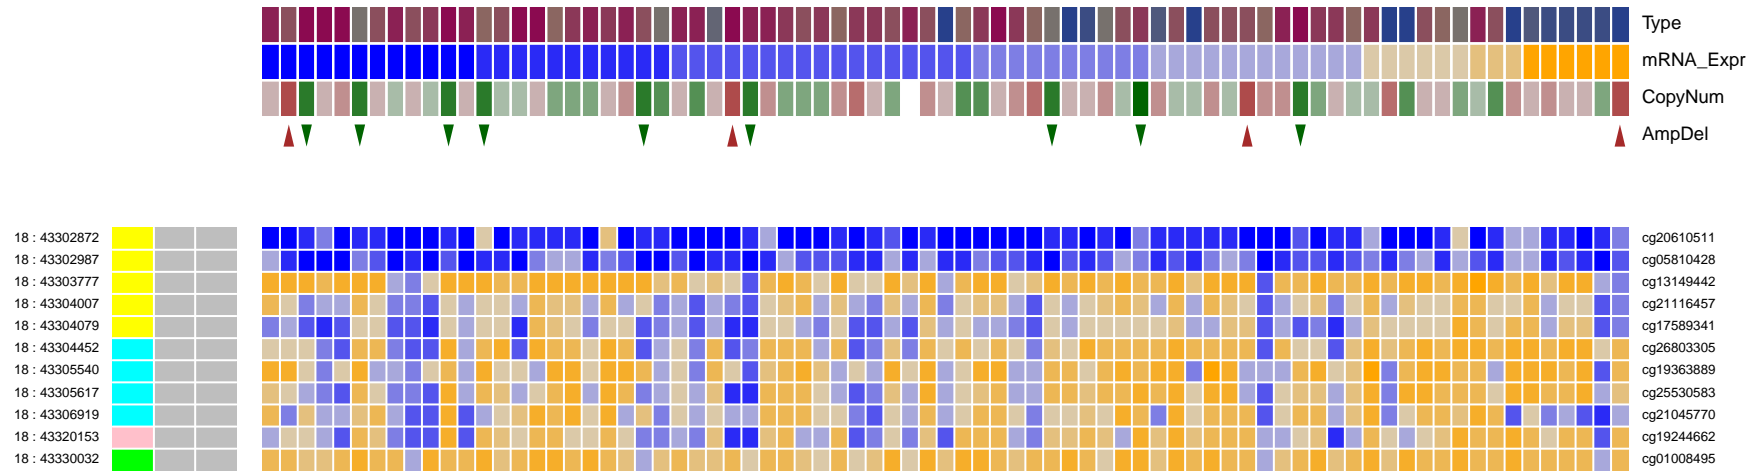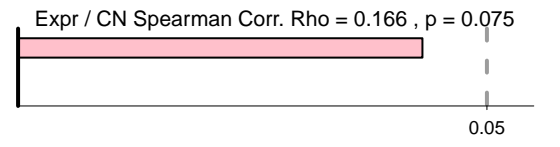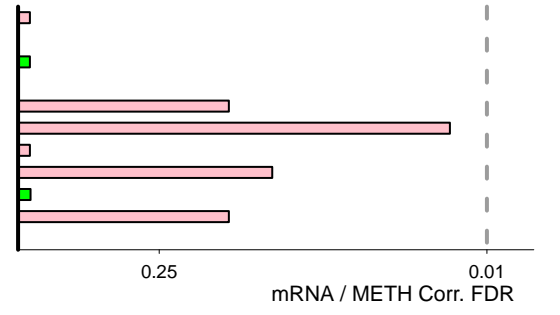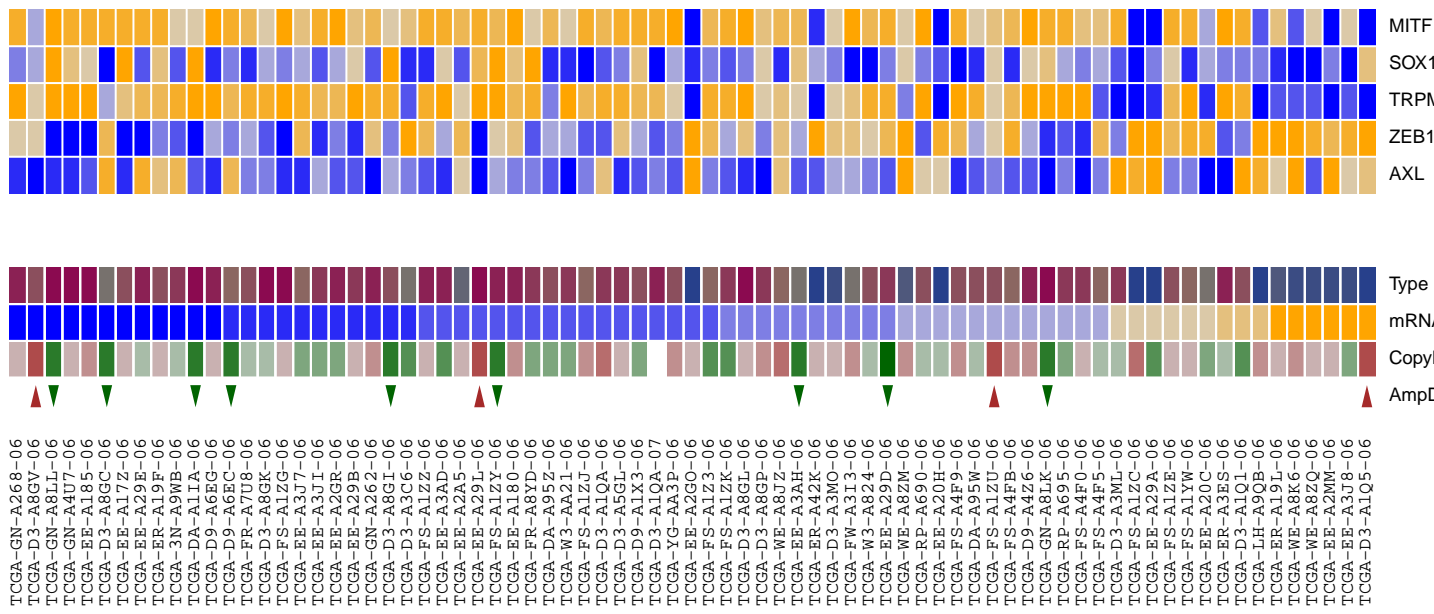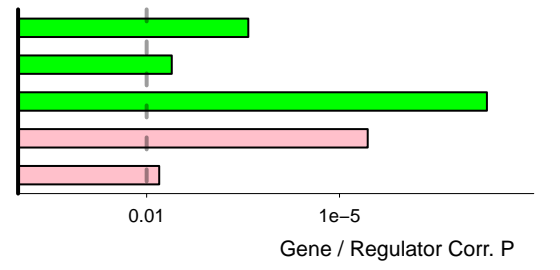

# ADAM19

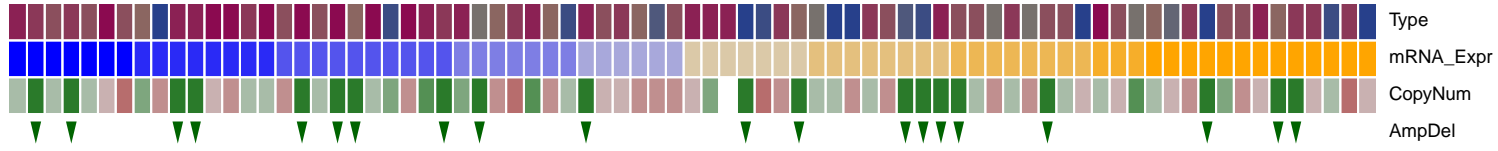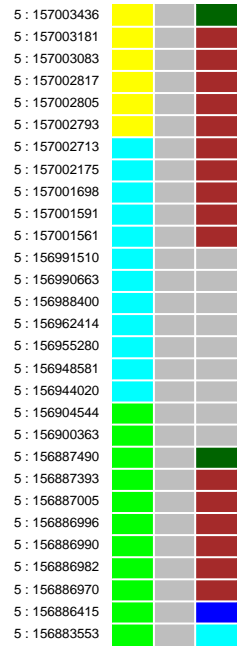

Geneloc  
PromoterAssoc  
CpGIsland

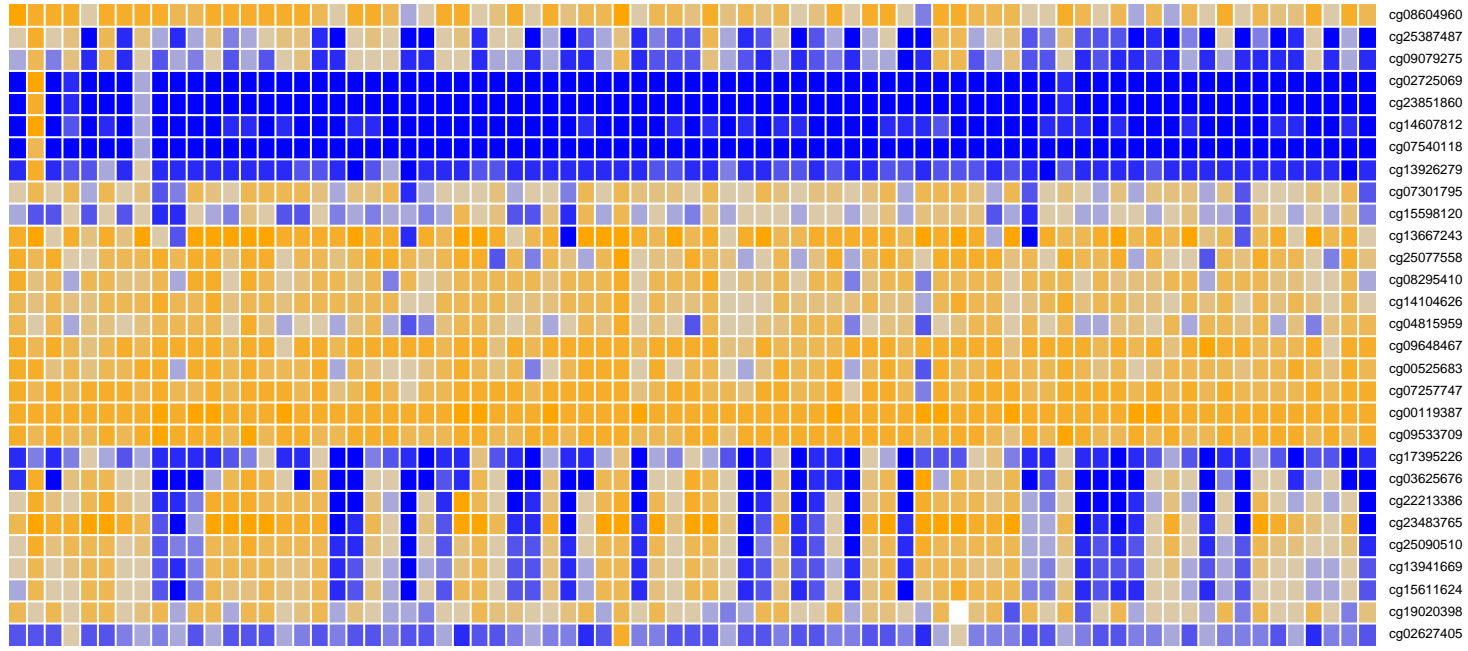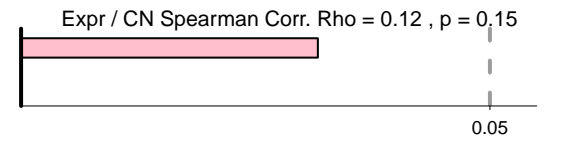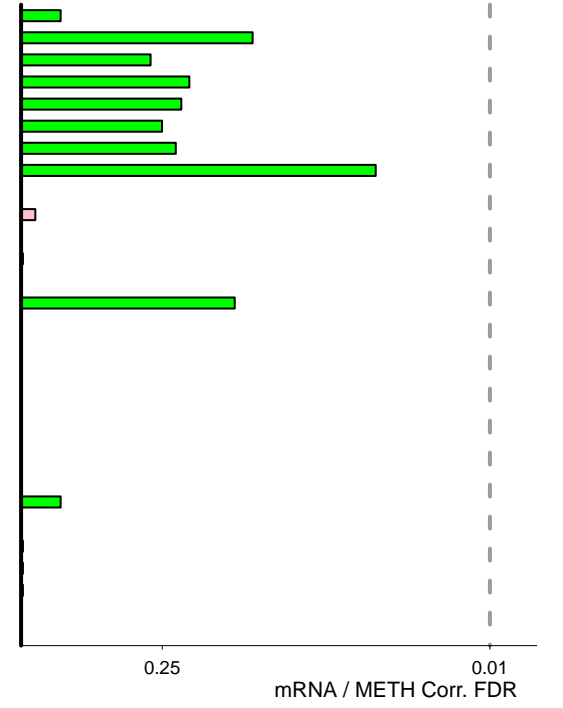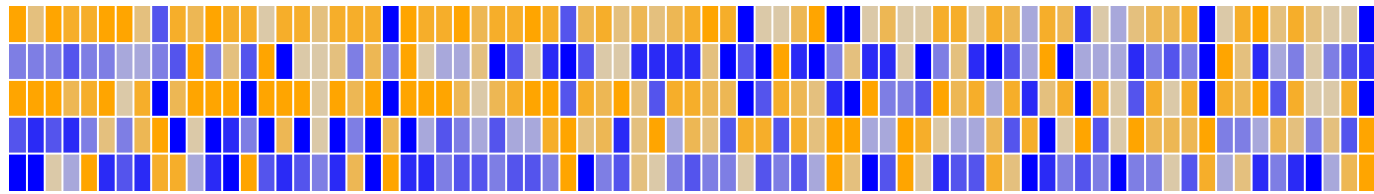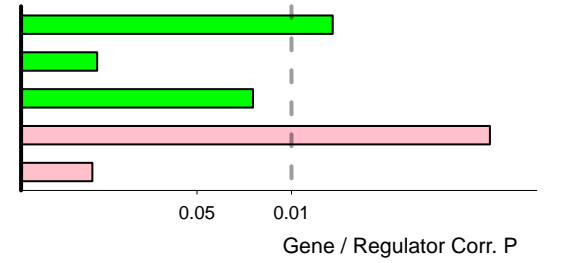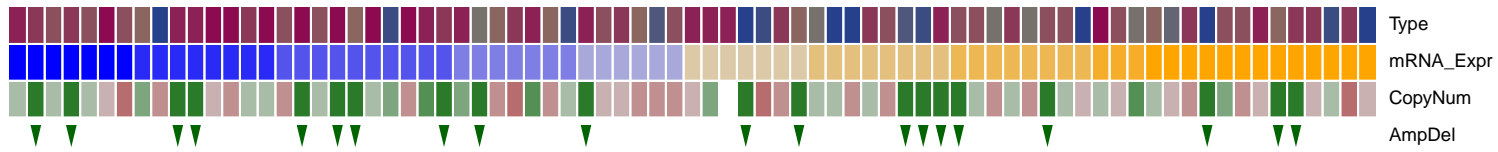

TCGA-ER-A3ES-06  
TCGA-FS-A4FO-06  
TCGA-RP-A690-06  
TCGA-EE-A3JI-06  
TCGA-D3-A1Q1-06  
TCGA-D3-A8GH-06  
TCGA-YG-AA3P-06  
TCGA-EE-A3J7-06  
TCGA-LH-A9OB-06  
TCGA-EE-A29E-06  
TCGA-FS-A1ZY-06  
TCGA-FS-A1ZG-06  
TCGA-GN-A8LK-06  
TCGA-D3-A3MT-06  
TCGA-DA-A1JF-06  
TCGA-FS-A4F9-06  
TCGA-EE-A18E-06  
TCGA-FS-A1ZU-06  
TCGA-GN-A4U7-06  
TCGA-EE-A29L-06  
TCGA-EE-A29L-06  
TCGA-EE-A2MM-06  
TCGA-GN-A8LL-06  
TCGA-EE-A3AD-06  
TCGA-RP-A695-06  
TCGA-EE-A2GR-06  
TCGA-EE-A3AH-06  
TCGA-FS-A1ZJ-06  
TCGA-D9-A4Z6-06  
TCGA-FS-A1YW-06  
TCGA-WE-A8K6-06  
TCGA-GN-A262-06  
TCGA-FS-A1ZE-06  
TCGA-EE-A29B-06  
TCGA-WE-A8JZ-06  
TCGA-ER-A19L-06  
TCGA-FR-A7U8-06  
TCGA-FS-A1ZZ-06  
TCGA-EE-A180-06  
TCGA-D3-A1QA-07  
TCGA-EE-A20H-06  
TCGA-WE-A8ZO-06  
TCGA-FR-A8YD-06  
TCGA-FS-A4FB-06  
TCGA-FW-A3I3-06  
TCGA-EE-A29A-06  
TCGA-D3-A1O5-06  
TCGA-R3-AA21-06  
TCGA-DA-A95Z-06  
TCGA-WE-A8ZM-06  
TCGA-EE-A3J8-06  
TCGA-GN-A1X3-06  
TCGA-D9-A1X3-06  
TCGA-DA-A95W-06  
TCGA-D3-A8GC-06  
TCGA-D3-A1QA-06  
TCGA-EE-A20C-06  
TCGA-EE-A17Z-06  
TCGA-W3-A824-06  
TCGA-ER-A42K-06  
TCGA-D3-A8GK-06  
TCGA-D3-A8GV-06  
TCGA-FS-A1Z3-06  
TCGA-EE-A2A5-06  
TCGA-EE-A29D-06  
TCGA-FS-A1ZC-06  
TCGA-D3-A8GI-06  
TCGA-ER-A19F-06  
TCGA-D9-A6EG-06  
TCGA-FS-A4F5-06  
TCGA-D3-A5GI-06  
TCGA-D3-A8GF-06  
TCGA-D3-A3MO-06  
TCGA-3N-A9WB-06  
TCGA-EE-A2GG-06

# KRT8

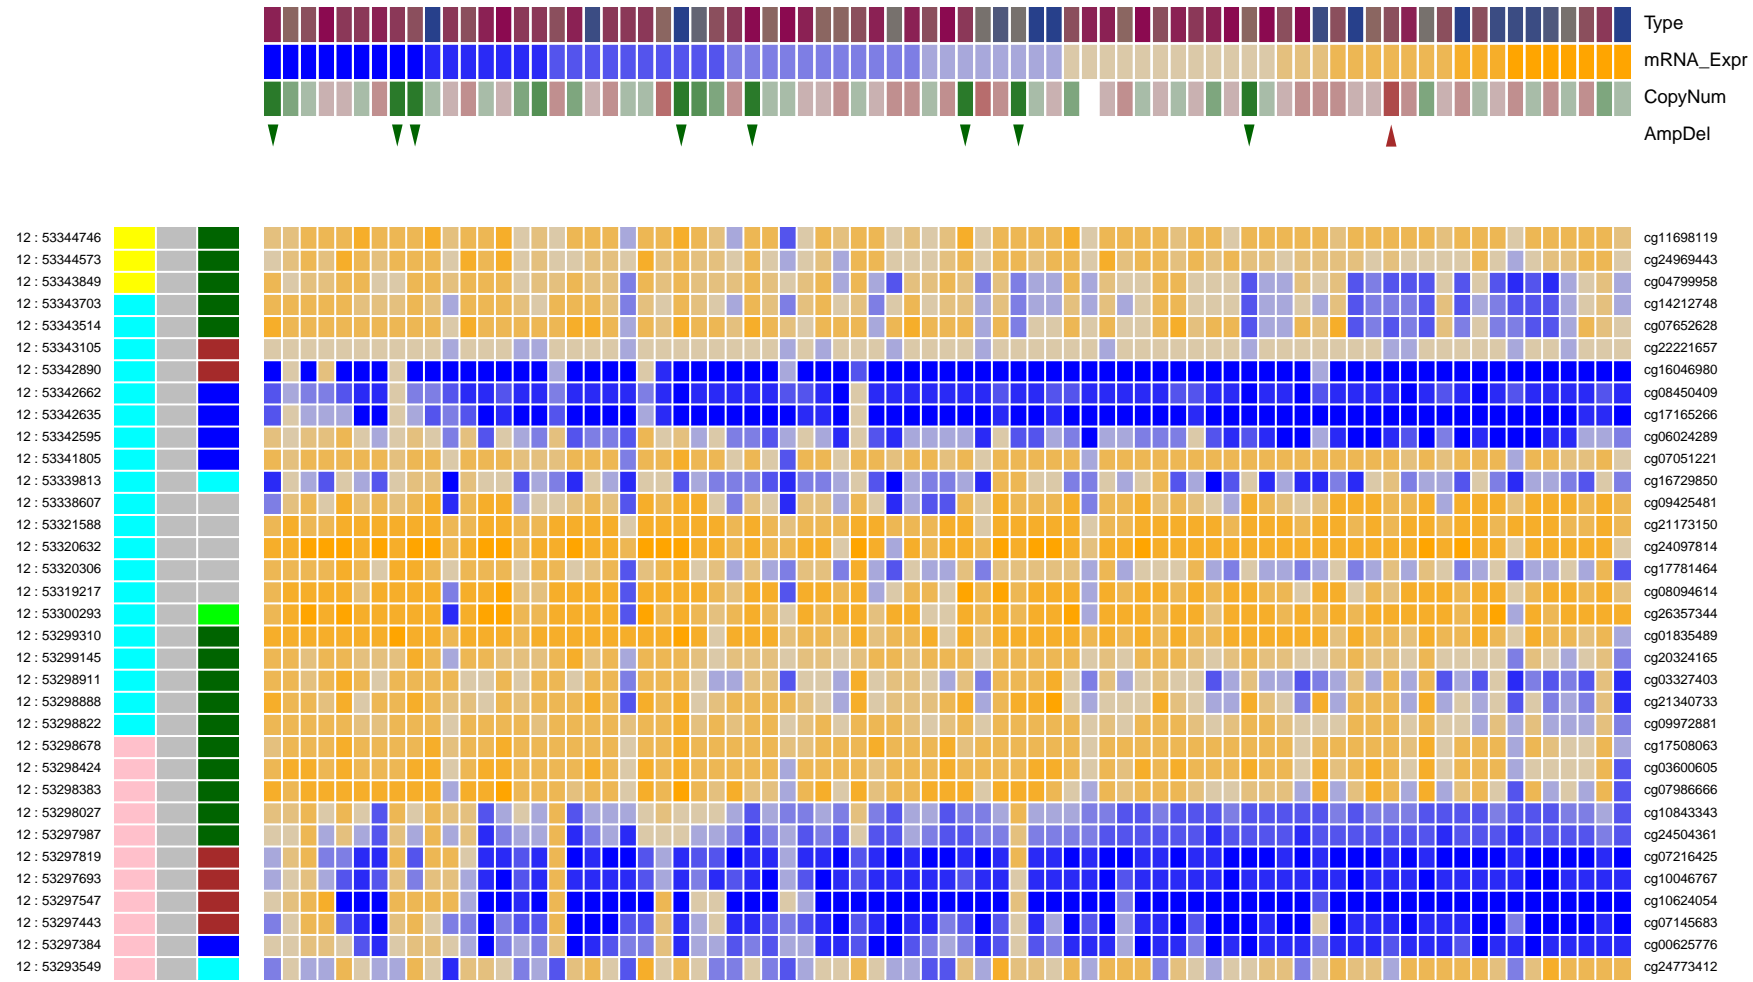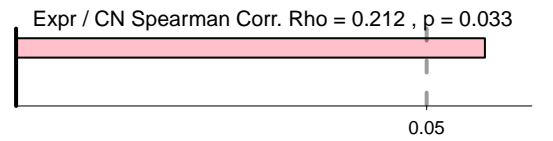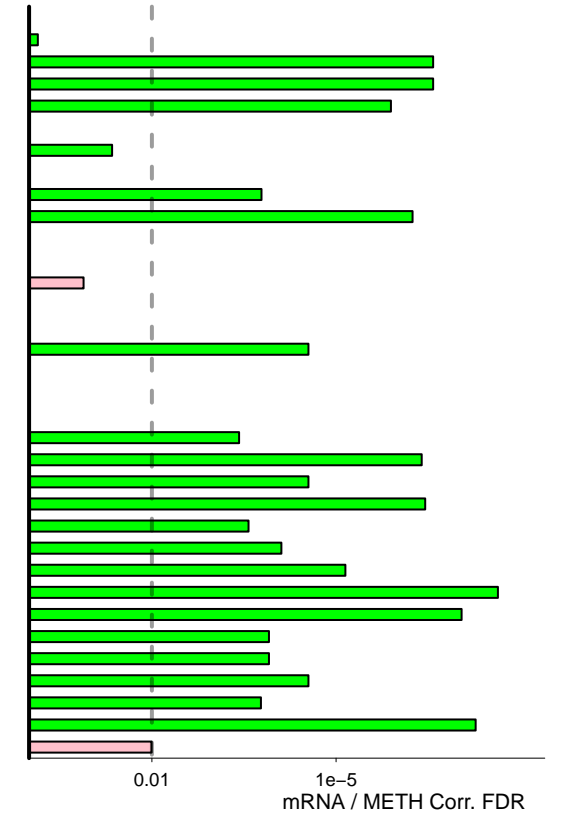

GeneLoc  
PromoterAssoc  
CpGIsland

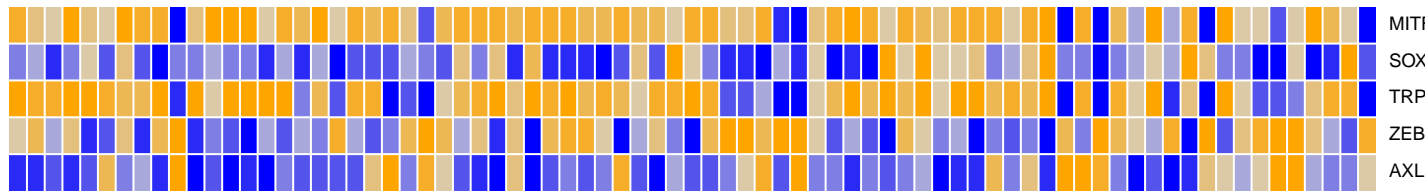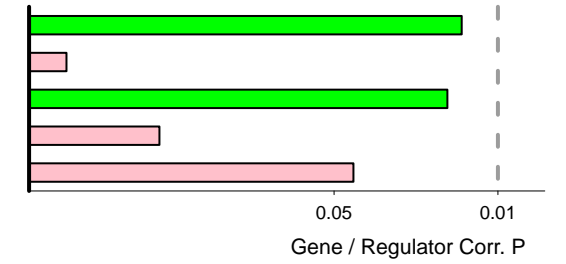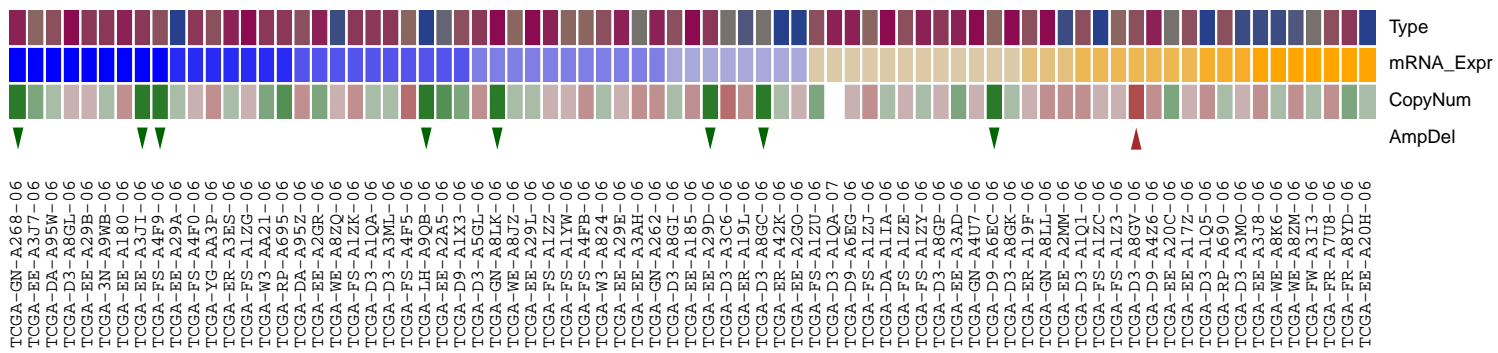

TCGA-GN-A268-06  
TCGA-EE-A3J7-06  
TCGA-DA-A95W-06  
TCGA-D3-A8GL-06  
TCGA-EE-A29B-06  
TCGA-3N-A9WB-06  
TCGA-EE-A180-06  
TCGA-EE-A3JI-06  
TCGA-FS-A4F9-06  
TCGA-EE-A29A-06  
TCGA-FS-A4F0-06  
TCGA-YG-A3P-06  
TCGA-ER-A3ES-06  
TCGA-FS-A1ZG-06  
TCGA-W3-A421-06  
TCGA-RP-A695-06  
TCGA-DA-A9EZ-06  
TCGA-EE-A3GR-06  
TCGA-WE-A8ZQ-06  
TCGA-FS-A1ZK-06  
TCGA-D3-A1QA-06  
TCGA-D3-A3ML-06  
TCGA-FS-A4F5-06  
TCGA-LH-A9OB-06  
TCGA-EE-A2A5-06  
TCGA-D9-A1X3-06  
TCGA-D3-A5GL-06  
TCGA-GN-A8LK-06  
TCGA-WE-A8JZ-06  
TCGA-EE-A29L-06  
TCGA-FS-A1ZZ-06  
TCGA-FS-A1YW-06  
TCGA-FS-A4FB-06  
TCGA-W3-A824-06  
TCGA-EE-A29E-06  
TCGA-EE-A3AH-06  
TCGA-GN-A262-06  
TCGA-D3-A8GI-06  
TCGA-EE-A185-06  
TCGA-EE-A29D-06  
TCGA-D3-A3C6-06  
TCGA-ER-A19L-06  
TCGA-D3-A8GC-06  
TCGA-ER-A4ZK-06  
TCGA-EE-A2GO-06  
TCGA-FS-A1ZU-06  
TCGA-D3-A1QA-07  
TCGA-D9-A6EG-06  
TCGA-FS-A1ZJ-06  
TCGA-DA-A1TA-06  
TCGA-FS-A1ZE-06  
TCGA-FS-A1ZY-06  
TCGA-D3-A8GF-06  
TCGA-EE-A3AD-06  
TCGA-GN-A4U7-06  
TCGA-D3-A8GK-06  
TCGA-ER-A19F-06  
TCGA-GN-A8LL-06  
TCGA-EE-A2NM-06  
TCGA-D3-A1Q1-06  
TCGA-FS-A1ZC-06  
TCGA-FS-A1Z3-06  
TCGA-D3-A8GV-06  
TCGA-D9-A4Z6-06  
TCGA-EE-A20C-06  
TCGA-EE-A17Z-06  
TCGA-D3-A1Q5-06  
TCGA-RP-A690-06  
TCGA-D3-A3MO-06  
TCGA-EE-A3J8-06  
TCGA-WE-A8K6-06  
TCGA-WE-A8ZM-06  
TCGA-FW-A3I3-06  
TCGA-FR-A7U8-06  
TCGA-FR-A8YD-06  
TCGA-EE-A20H-06

# CLMP

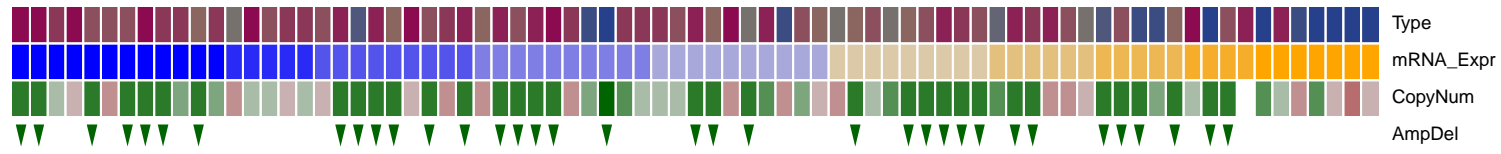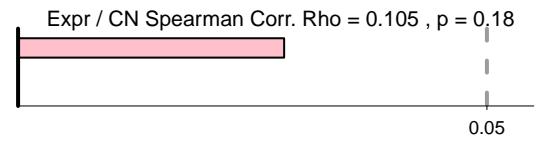

11 : 123067275  
 11 : 123067200  
 11 : 123066956  
 11 : 123066693  
 11 : 123066560  
 11 : 123066529  
 11 : 123066252  
 11 : 123066183  
 11 : 123066179  
 11 : 123066108  
 11 : 123065445  
 11 : 123065246  
 11 : 123063169  
 11 : 123057074  
 11 : 123052256  
 11 : 123050207  
 11 : 123036897  
 11 : 123034487  
 11 : 123029267  
 11 : 123016010  
 11 : 123008499  
 11 : 123001272  
 11 : 122993208  
 11 : 122954435  
 11 : 122943141

GeneLoc  
 PromoterAssoc  
 CpGIsland

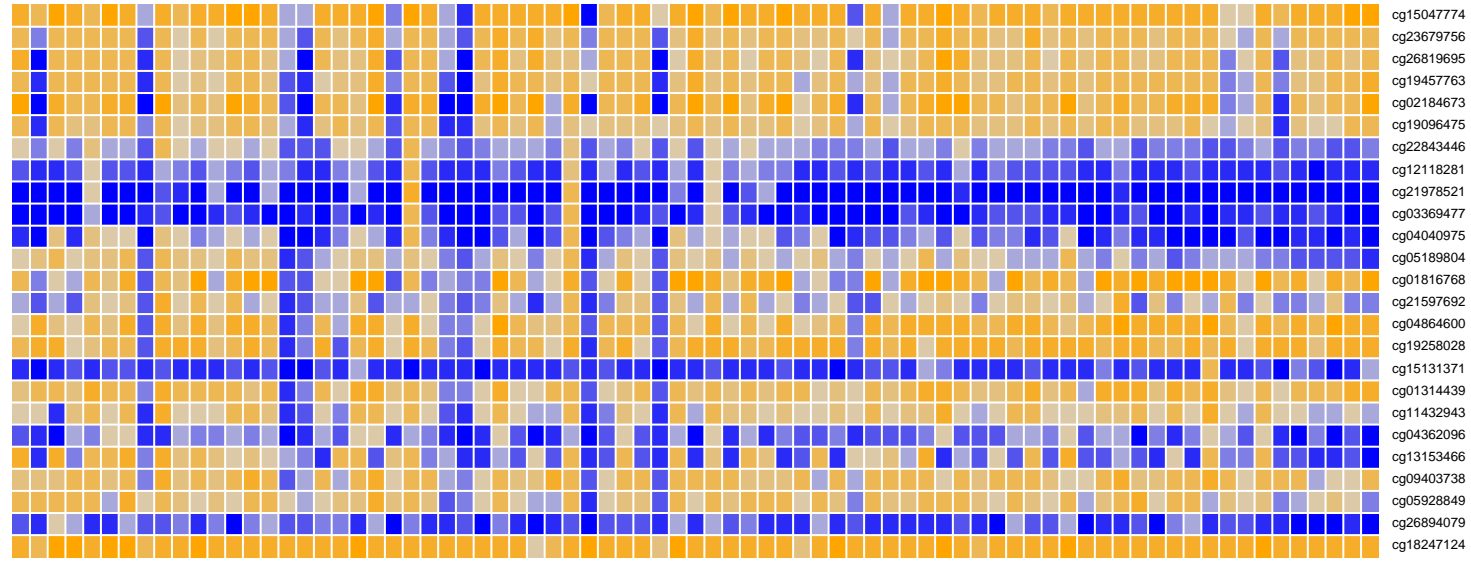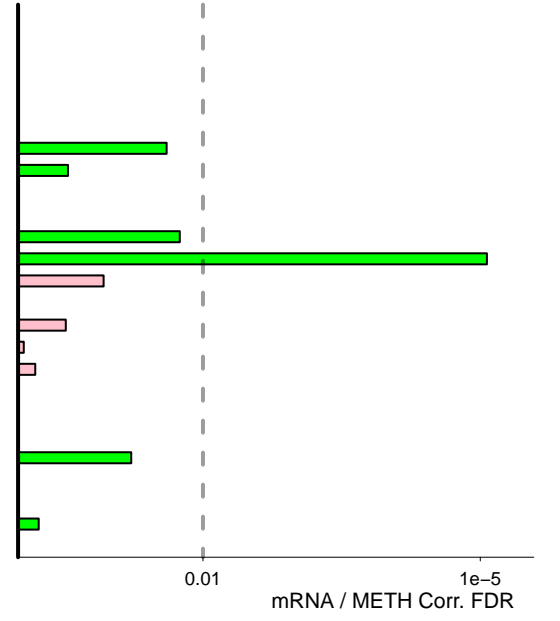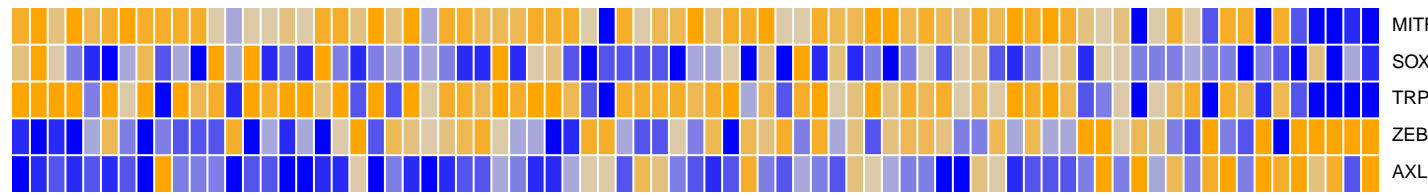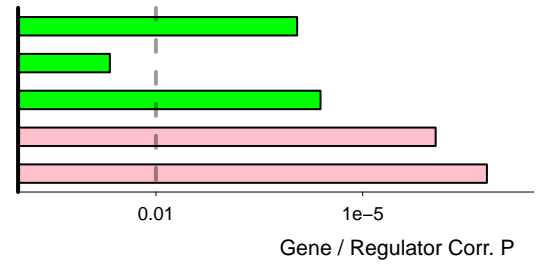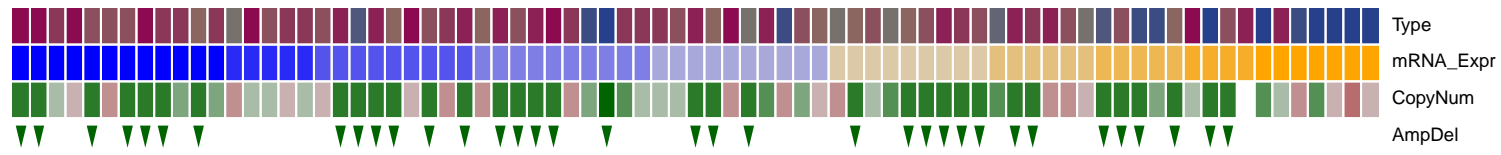

TCGA-GN-A8LK-06  
 TCGA-GN-A8LL-06  
 TCGA-EE-A29B-06  
 TCGA-FS-A1ZG-06  
 TCGA-DA-A95Z-06  
 TCGA-FS-A4F9-06  
 TCGA-YG-AA3P-06  
 TCGA-EE-A29L-06  
 TCGA-D3-A3ML-06  
 TCGA-EP-A695-06  
 TCGA-FS-A1ZJ-06  
 TCGA-FR-A8YD-06  
 TCGA-EE-A20C-06  
 TCGA-DA-A1IA-06  
 TCGA-DA-A95W-06  
 TCGA-FS-A4F0-06  
 TCGA-FS-A421-06  
 TCGA-EE-A17Z-06  
 TCGA-GN-A268-06  
 TCGA-ER-A19L-06  
 TCGA-ER-A3ES-06  
 TCGA-FS-A4F5-06  
 TCGA-D3-A6GL-06  
 TCGA-D3-A8GV-06  
 TCGA-D3-A5GL-06  
 TCGA-FS-A1ZZ-06  
 TCGA-FS-A4FB-06  
 TCGA-FR-A7U8-06  
 TCGA-EE-A3AD-06  
 TCGA-GN-A4U7-06  
 TCGA-EE-A3JI-06  
 TCGA-EE-A3J8-06  
 TCGA-EE-A20H-06  
 TCGA-FS-A1ZK-06  
 TCGA-3N-A9WB-06  
 TCGA-D3-A1QA-06  
 TCGA-W3-A824-06  
 TCGA-EE-A2GR-06  
 TCGA-EE-A3J7-06  
 TCGA-EE-A185-06  
 TCGA-D3-A8GC-06  
 TCGA-EE-A180-06  
 TCGA-WE-A8Z0-06  
 TCGA-D3-A8GI-06  
 TCGA-FS-A1YW-06  
 TCGA-EE-A3AH-06  
 TCGA-WE-A8TZ-06  
 TCGA-EP-A690-06  
 TCGA-FW-A3I3-06  
 TCGA-FS-A1Z3-06  
 TCGA-FS-A1ZE-06  
 TCGA-GN-A262-06  
 TCGA-D3-A6GP-06  
 TCGA-ER-A19F-06  
 TCGA-EE-A2A5-06  
 TCGA-EE-A6EG-06  
 TCGA-EE-A29D-06  
 TCGA-EE-A426-06  
 TCGA-D9-A1X3-06  
 TCGA-D3-A3C6-06  
 TCGA-WE-A8ZM-06  
 TCGA-FS-A1ZU-06  
 TCGA-EE-A2MM-06  
 TCGA-D3-A3M0-06  
 TCGA-D9-A6EC-06  
 TCGA-D3-A8GK-06  
 TCGA-LH-A9QB-06  
 TCGA-D3-A1Q1-06  
 TCGA-D3-A1QA-07  
 TCGA-EE-A29A-06  
 TCGA-EE-A29E-06  
 TCGA-WE-A8K6-06  
 TCGA-D3-A1O5-06  
 TCGA-FS-A1ZC-06  
 TCGA-ER-A42K-06  
 TCGA-EE-A2GO-06

# NRG1

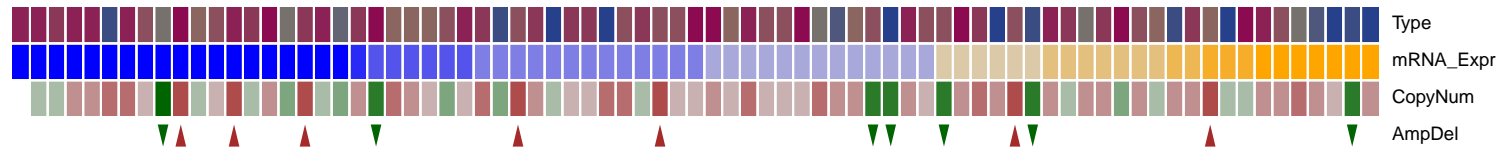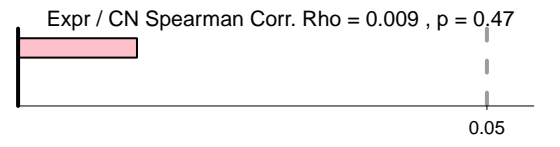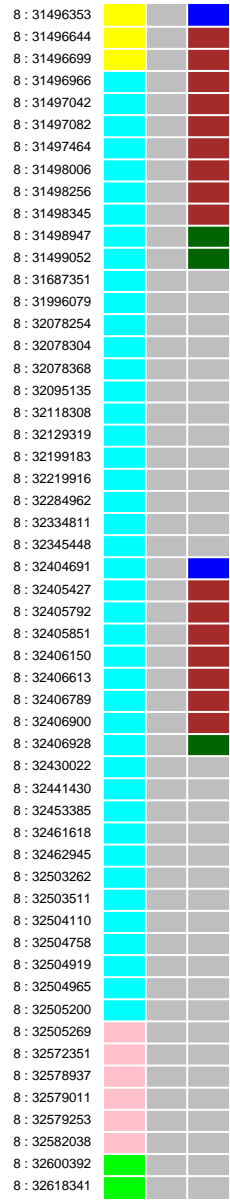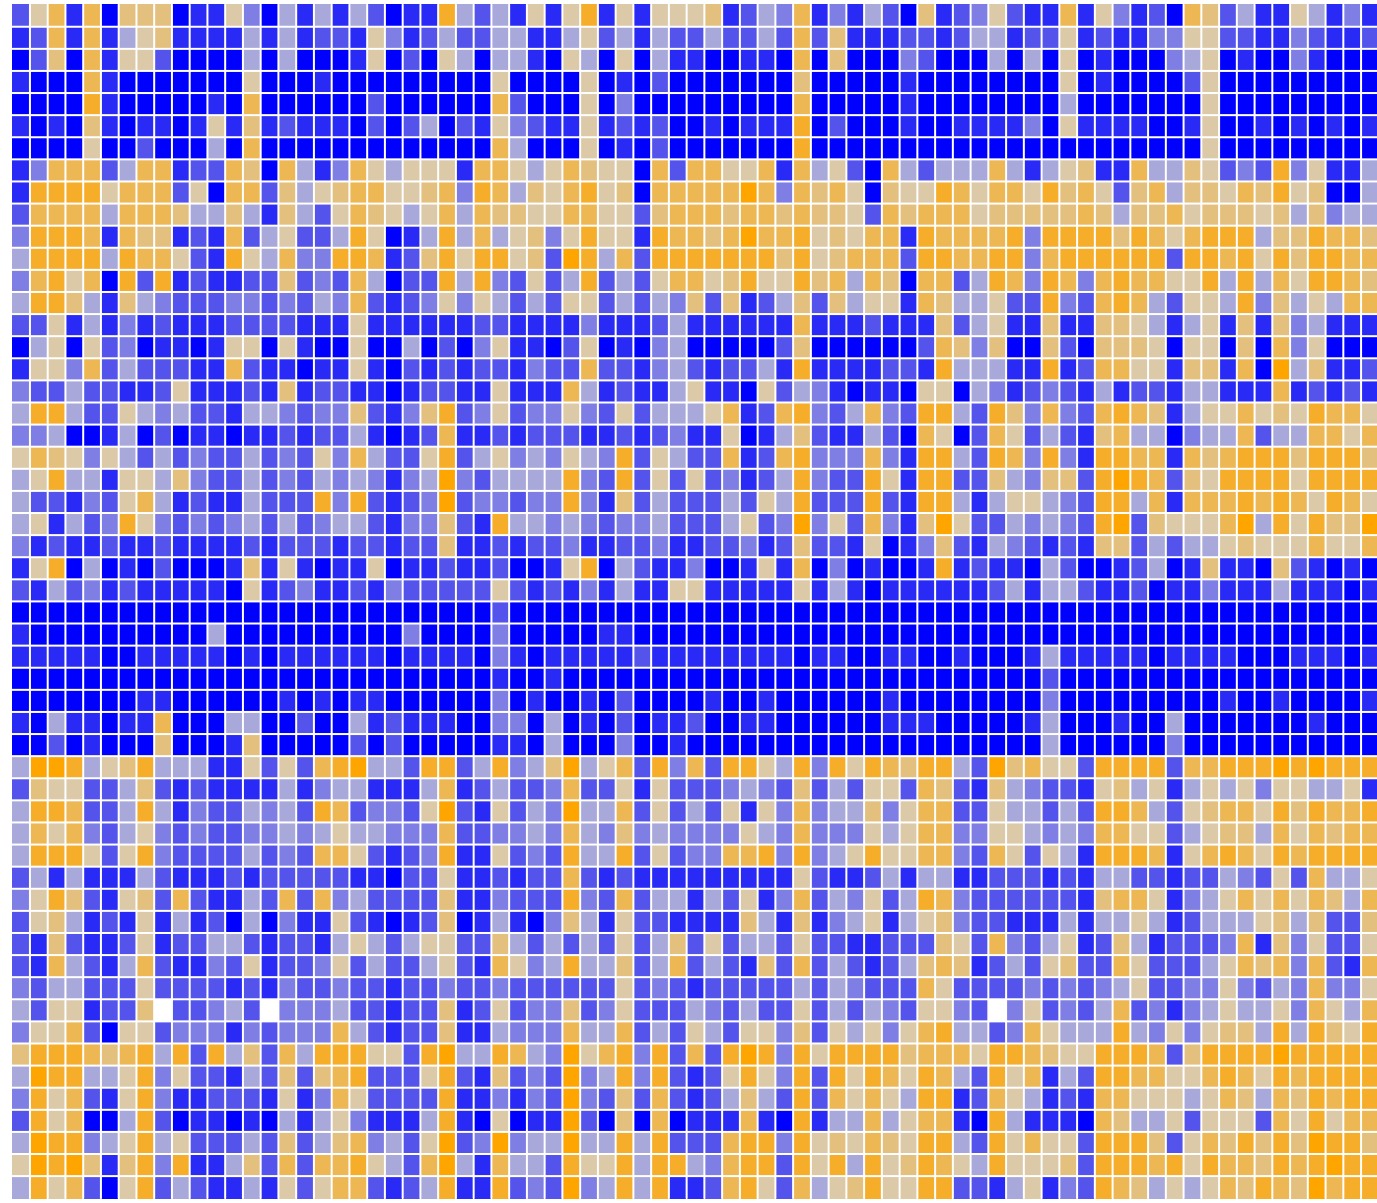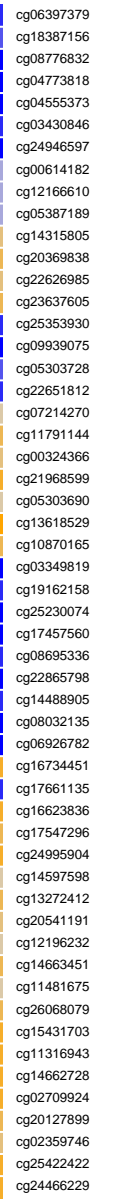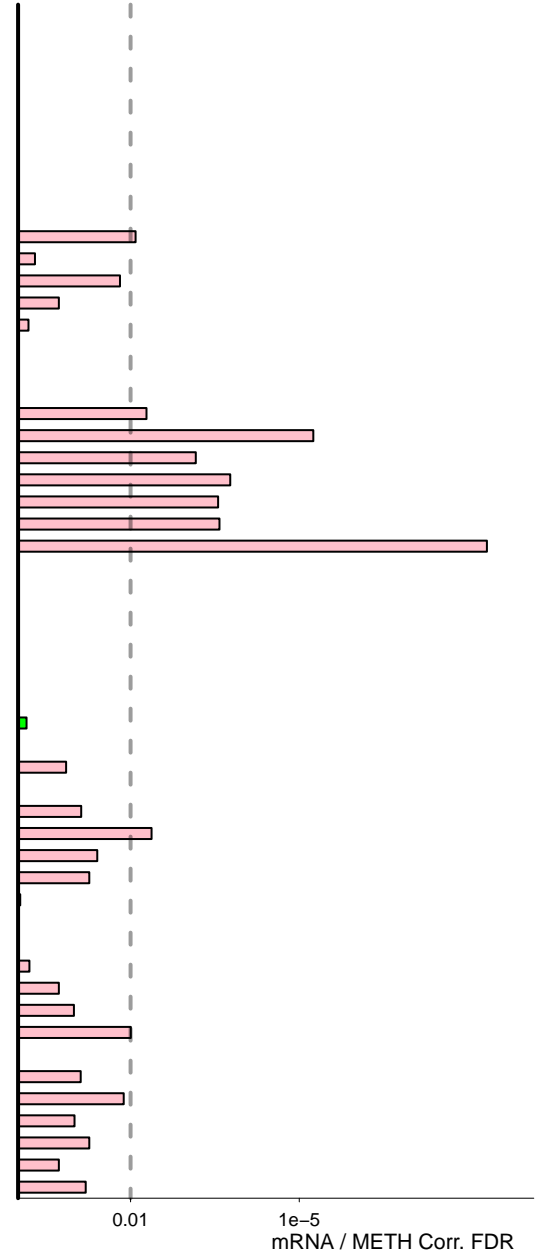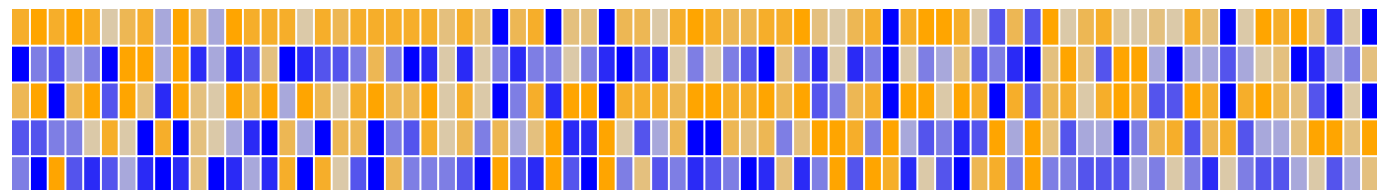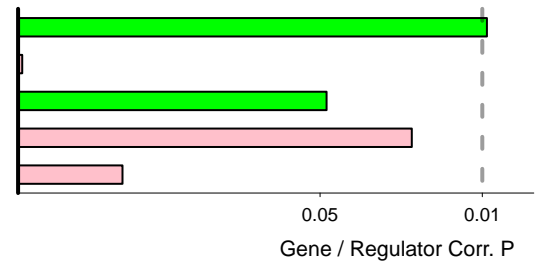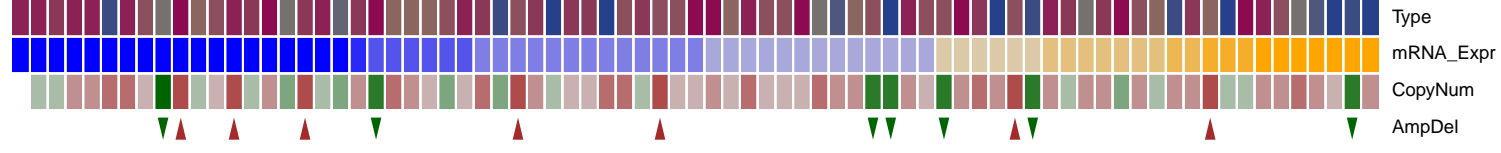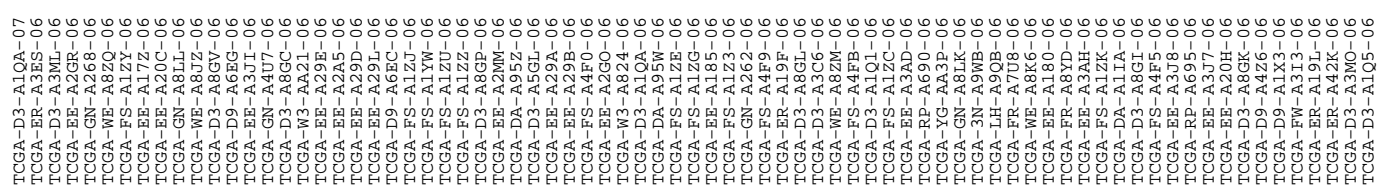

# ITGA11

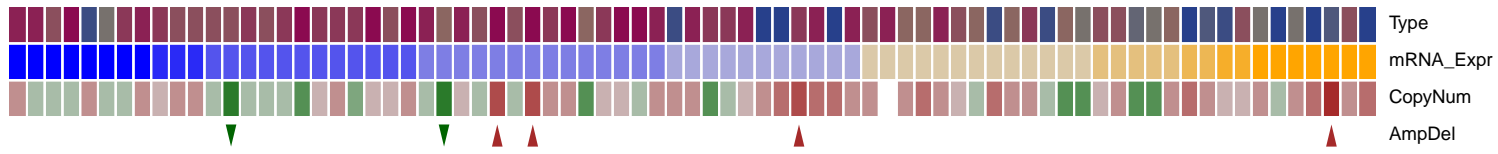

15:68725002  
15:68724948  
15:68724752  
15:68724690  
15:68724370  
15:68724065  
15:68723914  
15:68723805  
15:68723690  
15:68719924  
15:68711872  
15:68699713  
15:68682927  
15:68678044  
15:68672005  
15:68645969  
15:68640339  
15:68624879  
15:68624768  
15:68624713  
15:68623032  
15:68608583  
15:68606598  
15:68594526

GeneLoc  
PromoterAssoc  
CpGIsland

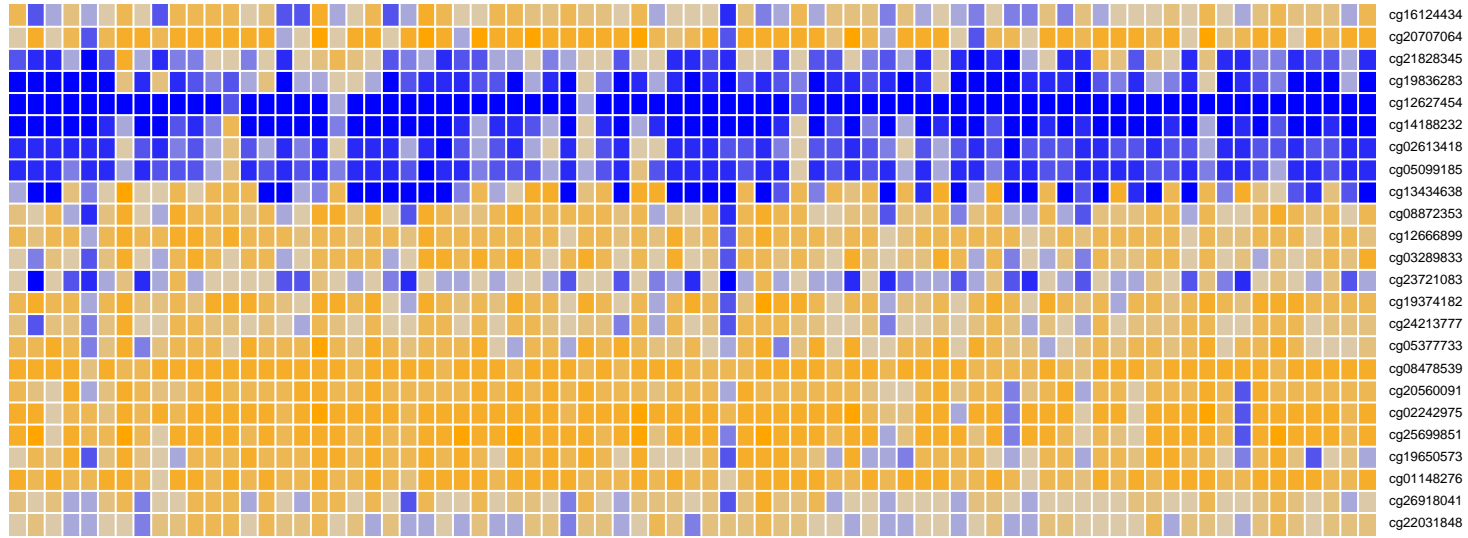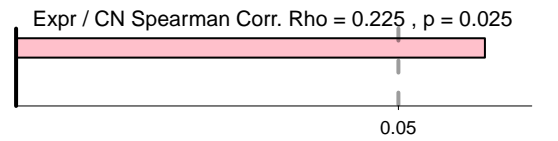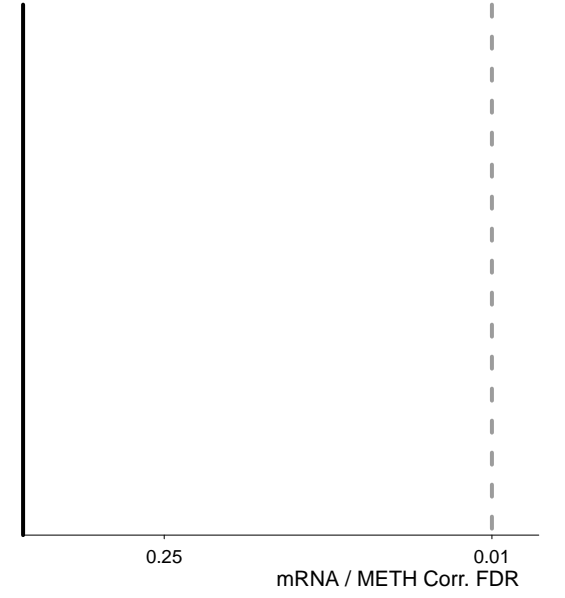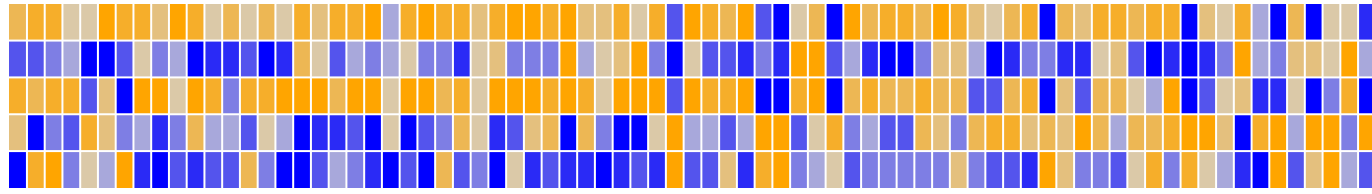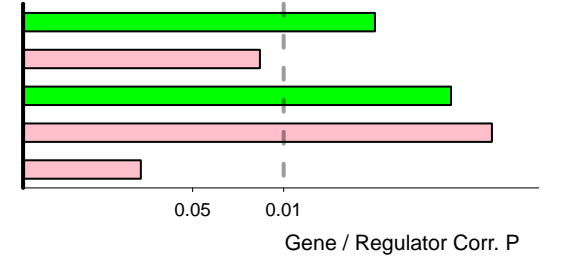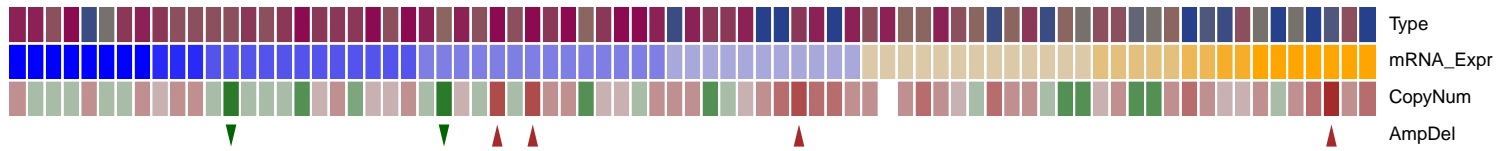

TCGA-GN-A262-06  
TCGA-EE-A29E-06  
TCGA-D3-A1Q1-06  
TCGA-D3-A8GK-06  
TCGA-EE-A3J8-06  
TCGA-FW-A3I3-06  
TCGA-D3-A3ML-06  
TCGA-EE-A3AD-06  
TCGA-FS-A4F0-06  
TCGA-YG-A4P3-06  
TCGA-FS-A4F9-06  
TCGA-DA-A95W-06  
TCGA-DA-A95Z-06  
TCGA-3N-A9WB-06  
TCGA-W3-A824-06  
TCGA-W3-A821-06  
TCGA-EE-A39L-06  
TCGA-EE-A39E-06  
TCGA-EE-A39I-06  
TCGA-RP-A695-06  
TCGA-FS-A1ZG-06  
TCGA-D3-A8GV-06  
TCGA-EE-A185-06  
TCGA-ER-A3ES-06  
TCGA-D9-A6EC-06  
TCGA-FS-A1ZZ-06  
TCGA-FS-A1ZU-06  
TCGA-GN-A8LK-06  
TCGA-RP-A690-06  
TCGA-D3-A8GL-06  
TCGA-EE-A29D-06  
TCGA-GN-A8LL-06  
TCGA-EE-A3J7-06  
TCGA-D3-A8GP-06  
TCGA-GN-A4U7-06  
TCGA-DA-A1IA-06  
TCGA-GN-A268-06  
TCGA-WE-A8K6-06  
TCGA-D9-A4Z6-06  
TCGA-FS-A1ZK-06  
TCGA-D3-A1QA-06  
TCGA-D9-A6EG-06  
TCGA-LH-A9QB-06  
TCGA-EE-A2GO-06  
TCGA-FR-A8YD-06  
TCGA-FS-A1ZY-06  
TCGA-EE-A20H-06  
TCGA-EE-A2GR-06  
TCGA-FR-A7U8-06  
TCGA-D3-A1QA-07  
TCGA-FS-A1ZT-06  
TCGA-FS-A1Z3-06  
TCGA-EE-A180-06  
TCGA-ER-A1JF-06  
TCGA-FS-A4F5-06  
TCGA-FS-A4FB-06  
TCGA-FS-A8ZQ-06  
TCGA-D3-A5GL-06  
TCGA-EE-A2NM-06  
TCGA-WE-A8JZ-06  
TCGA-D3-A3C6-06  
TCGA-FS-A1ZE-06  
TCGA-D9-A1X3-06  
TCGA-EE-A2A5-06  
TCGA-D3-A8GC-06  
TCGA-FS-A1YW-06  
TCGA-FS-A1ZC-06  
TCGA-ER-A19L-06  
TCGA-D3-A3MO-06  
TCGA-EE-A17Z-06  
TCGA-EE-A20C-06  
TCGA-EE-A29A-06  
TCGA-EE-A3AH-06  
TCGA-D3-A1O5-06  
TCGA-WE-A8ZM-06  
TCGA-D3-A8GI-06  
TCGA-ER-A4ZK-06

# RARRES3

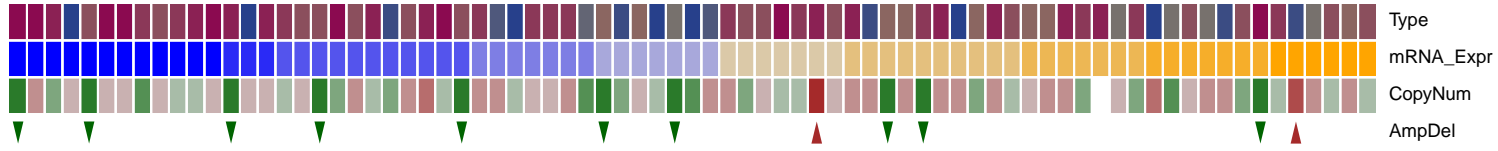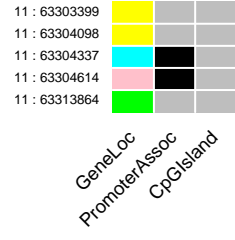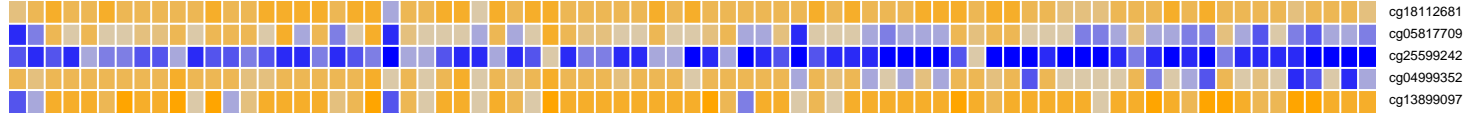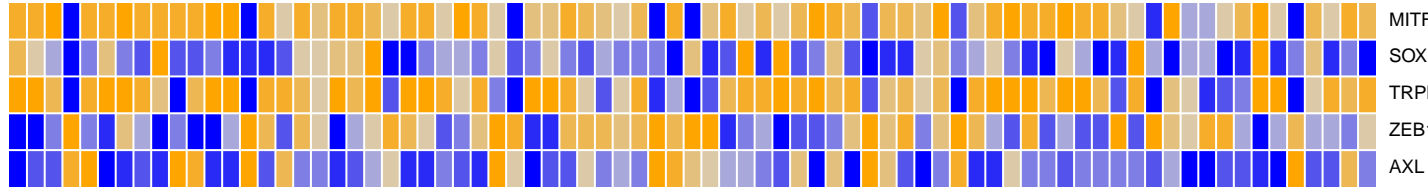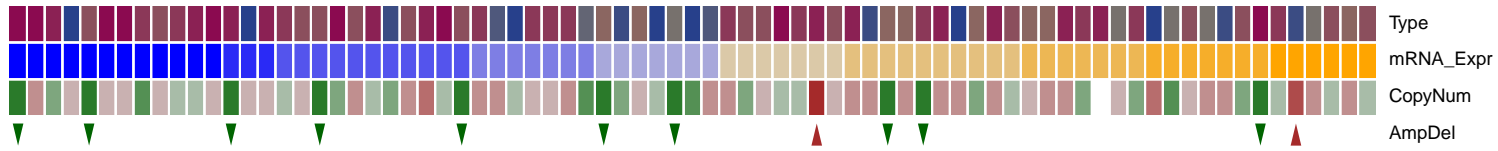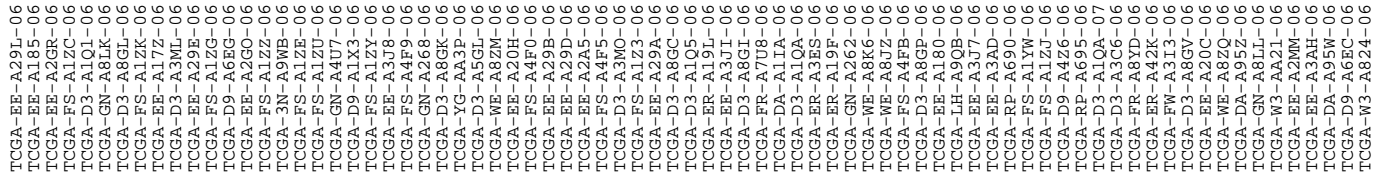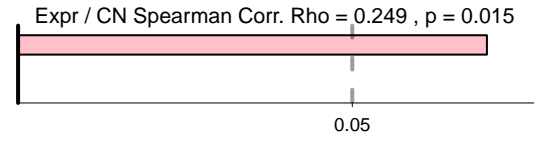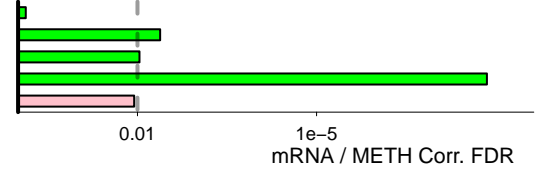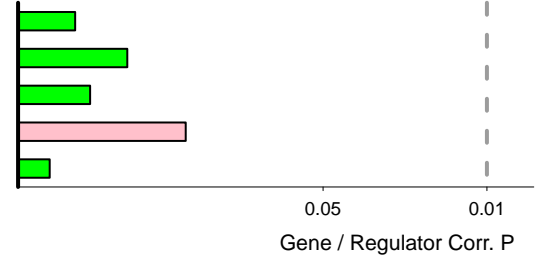

# FHL1

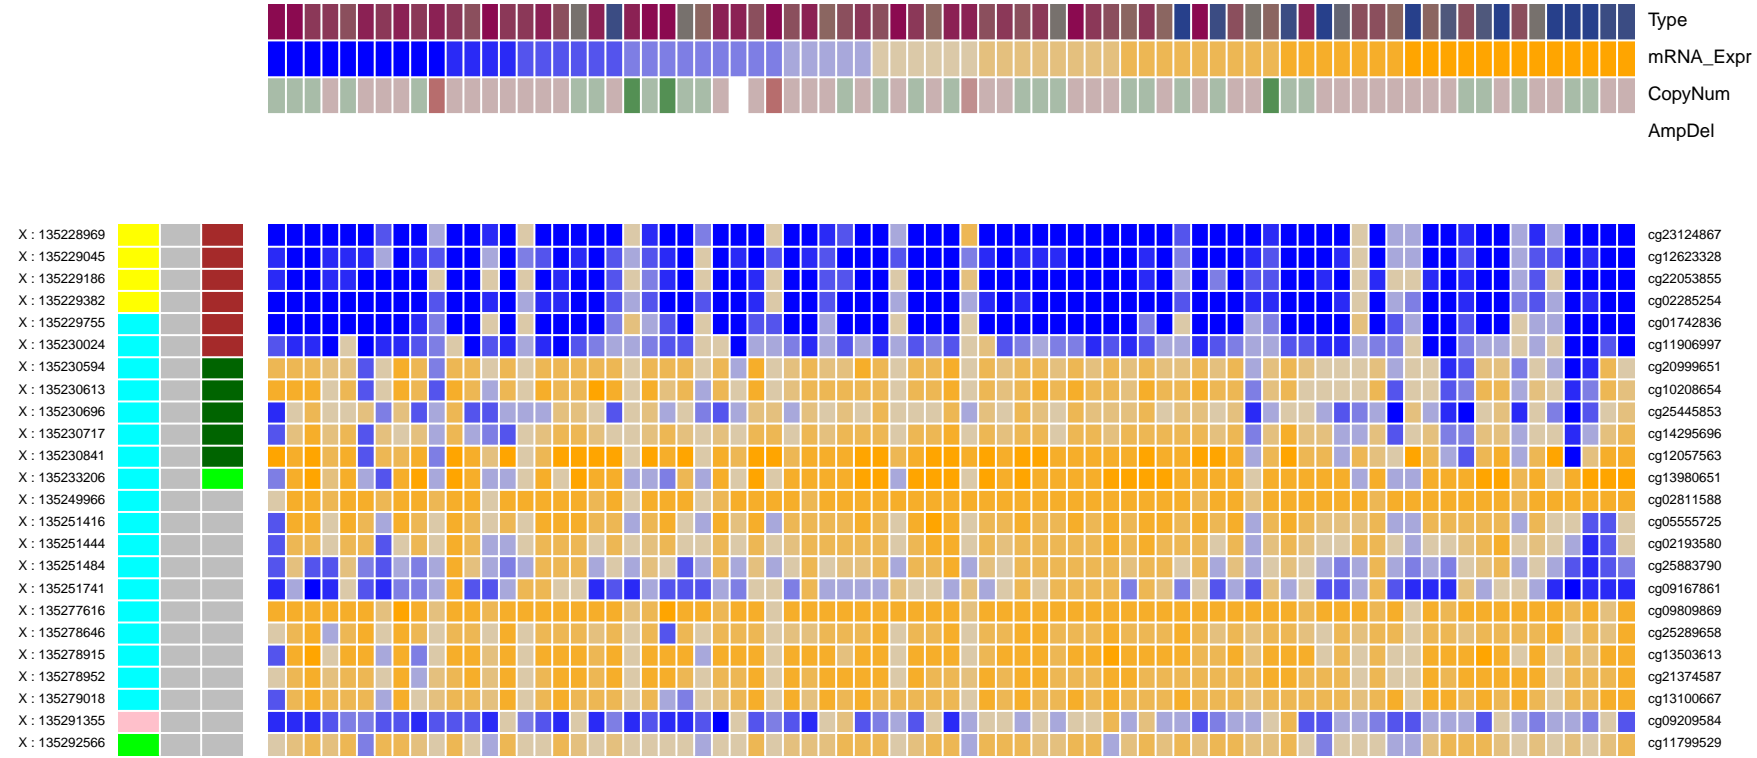

X : 135228969  
 X : 135229045  
 X : 135229186  
 X : 135229382  
 X : 135229755  
 X : 135230024  
 X : 135230594  
 X : 135230613  
 X : 135230696  
 X : 135230717  
 X : 135230841  
 X : 135233206  
 X : 135249966  
 X : 135251416  
 X : 135251444  
 X : 135251484  
 X : 135251741  
 X : 135277616  
 X : 135278646  
 X : 135278915  
 X : 135278952  
 X : 135279018  
 X : 135291355  
 X : 135292566

GeneLoc  
 PromoterAssoc  
 CpGIsland

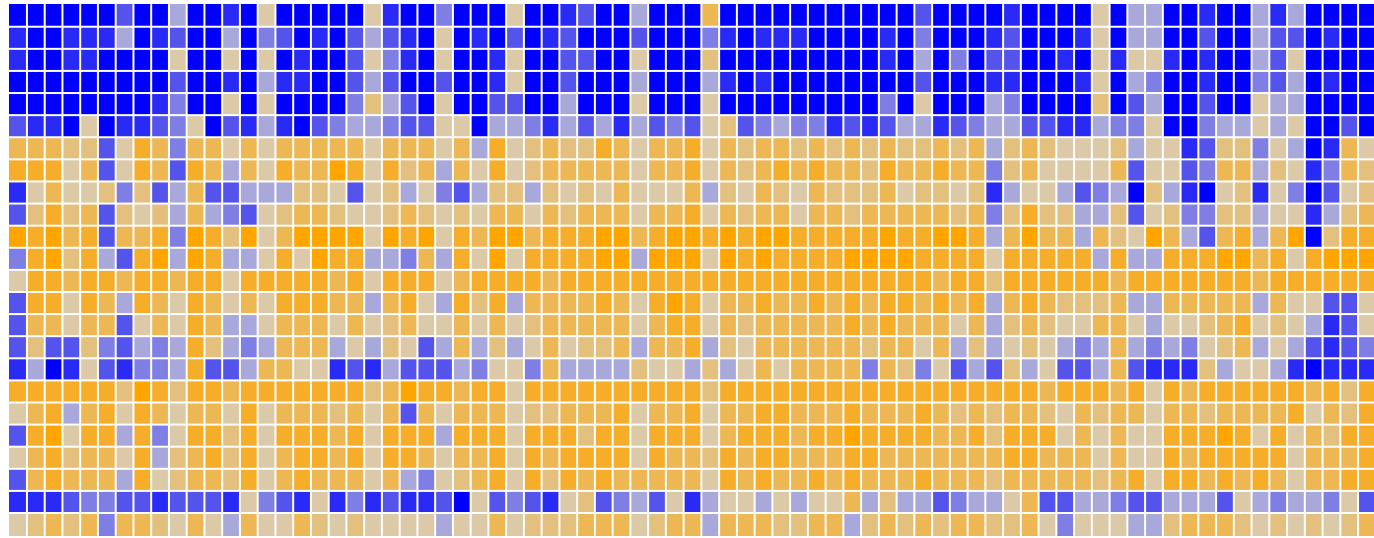

cg23124867  
 cg12623328  
 cg22053855  
 cg02285254  
 cg01742836  
 cg11906997  
 cg20999651  
 cg10208654  
 cg25445853  
 cg14295696  
 cg12057563  
 cg13980651  
 cg02811588  
 cg05555725  
 cg02193580  
 cg25883790  
 cg09167861  
 cg09809869  
 cg25289658  
 cg13503613  
 cg21374587  
 cg13100667  
 cg09209584  
 cg11799529

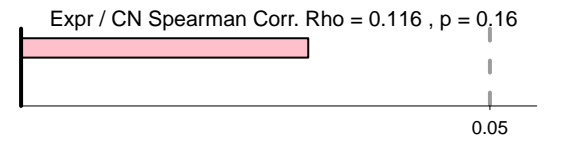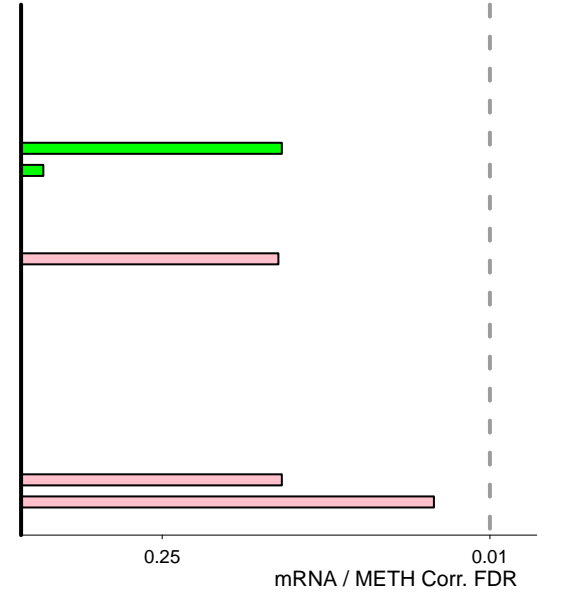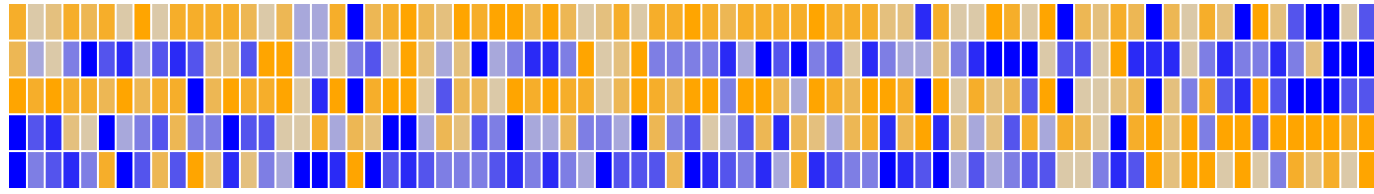

MITF  
 SOX10  
 TRPM1  
 ZEB1  
 AXL

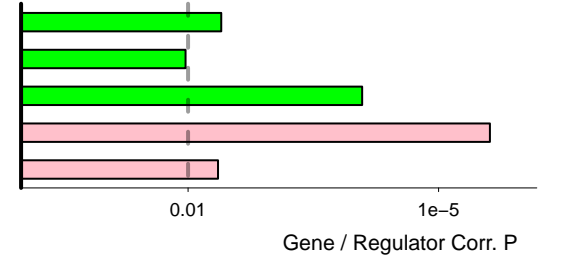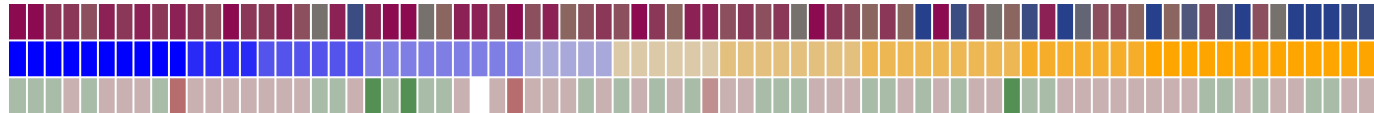

TCGA-EE-A29L-06  
 TCGA-D3-A8GK-06  
 TCGA-EE-A29B-06  
 TCGA-D3-A5GL-06  
 TCGA-W3-A824-06  
 TCGA-EE-A29E-06  
 TCGA-W3-AA21-06  
 TCGA-EE-A2GR-06  
 TCGA-3N-A9WB-06  
 TCGA-FS-A1ZZ-06  
 TCGA-D3-A3ML-06  
 TCGA-ER-A19F-06  
 TCGA-GN-A4U7-06  
 TCGA-D3-A1QA-06  
 TCGA-FR-A8YD-06  
 TCGA-FS-A1ZY-06  
 TCGA-D3-A8GV-06  
 TCGA-EE-A3OC-06  
 TCGA-EE-A3AD-06  
 TCGA-EE-A2MM-06  
 TCGA-GN-A26Z-06  
 TCGA-EE-A185-06  
 TCGA-GN-A8LL-06  
 TCGA-EE-A3AH-06  
 TCGA-FS-A4F5-06  
 TCGA-EE-A180-06  
 TCGA-D3-A1QA-07  
 TCGA-YG-AA3P-06  
 TCGA-FS-A1ZG-06  
 TCGA-FR-A7U8-06  
 TCGA-D9-A6EG-06  
 TCGA-FS-A1Z3-06  
 TCGA-D3-A8G1-06  
 TCGA-D3-A8GP-06  
 TCGA-D9-A1X3-06  
 TCGA-DA-A1IA-06  
 TCGA-EE-A29D-06  
 TCGA-D9-A6EC-06  
 TCGA-ER-A3ES-06  
 TCGA-GN-A268-06  
 TCGA-DA-A95Z-06  
 TCGA-RP-A695-06  
 TCGA-FS-A4F9-06  
 TCGA-EE-A3JI-06  
 TCGA-D3-A8GC-06  
 TCGA-FS-A1ZK-06  
 TCGA-FS-A1ZE-06  
 TCGA-FS-A1YW-06  
 TCGA-FS-A4F0-06  
 TCGA-EE-A3J7-06  
 TCGA-ER-A2ZK-06  
 TCGA-GN-A8LK-06  
 TCGA-D3-A3MO-06  
 TCGA-DA-A95W-06  
 TCGA-FW-A3I3-06  
 TCGA-FS-A1ZJ-06  
 TCGA-WE-A8ZQ-06  
 TCGA-D9-A4Z6-06  
 TCGA-EE-A20H-06  
 TCGA-EE-A2A5-06  
 TCGA-FS-A1ZU-06  
 TCGA-EE-A17Z-06  
 TCGA-FS-A4FB-06  
 TCGA-WE-A8JZ-06  
 TCGA-WE-A8ZM-06  
 TCGA-D3-A1Q1-06  
 TCGA-ER-A19L-06  
 TCGA-EE-A29A-06  
 TCGA-RP-A690-06  
 TCGA-D3-A3C6-06  
 TCGA-LH-A9OB-06  
 TCGA-D3-A1Q5-06  
 TCGA-FS-A1ZC-06  
 TCGA-EE-A3J8-06  
 TCGA-WE-A8K6-06

Type  
 mRNA\_Expr  
 CopyNum  
 AmpDel



# DSE

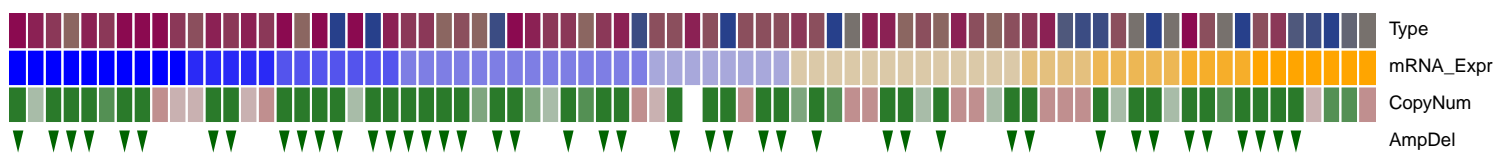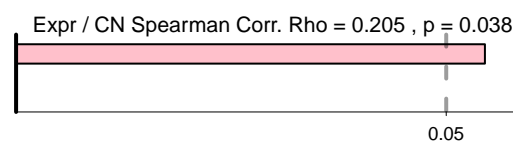

6:116574713  
6:116574804  
6:116575135  
6:116575311  
6:116575314  
6:116575322  
6:116575324  
6:116575339  
6:116575894  
6:116575913  
6:116576566  
6:116579888  
6:116598395  
6:116600143  
6:116600638  
6:116600728  
6:116601073  
6:116601139  
6:116601141  
6:116601170  
6:116601173  
6:116601191  
6:116601248  
6:116601288  
6:116601312  
6:116601353  
6:116601663  
6:116645836  
6:116674019  
6:116688224  
6:116691382  
6:116691460  
6:116691685  
6:116691851  
6:116691863  
6:116692074  
6:116692265  
6:116692748  
6:116692844  
6:116692922  
6:116693156  
6:116698176  
6:116726398  
6:116732515  
6:116745588

GeneLoc  
PromoterAssoc  
CpGIsland

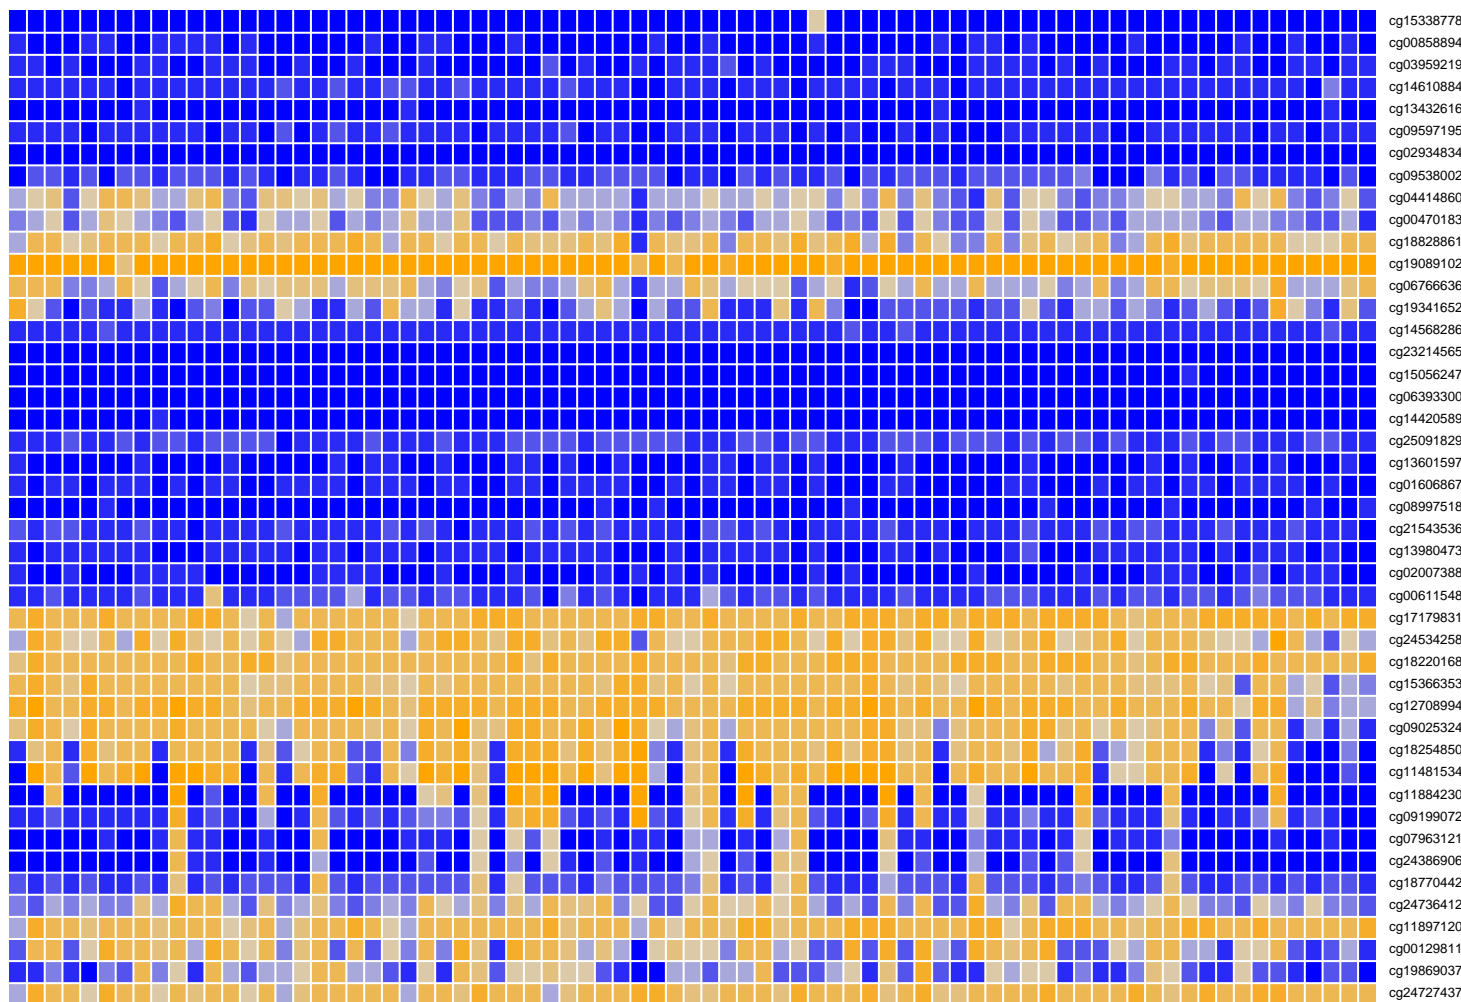

cg15338778  
cg00858894  
cg03959219  
cg14610884  
cg13432616  
cg09597195  
cg02934834  
cg09538002  
cg04414860  
cg00470183  
cg18828861  
cg19089102  
cg06766636  
cg19341652  
cg14568286  
cg23214565  
cg15056247  
cg06393300  
cg14420589  
cg25091829  
cg13601597  
cg01606867  
cg08997518  
cg21543536  
cg13980473  
cg02007388  
cg00611548  
cg17179831  
cg24534258  
cg18220168  
cg15366353  
cg12708994  
cg09025324  
cg18254850  
cg11481534  
cg11884230  
cg09199072  
cg07963121  
cg24386906  
cg18770442  
cg24736412  
cg11897120  
cg00129811  
cg19869037  
cg24727437

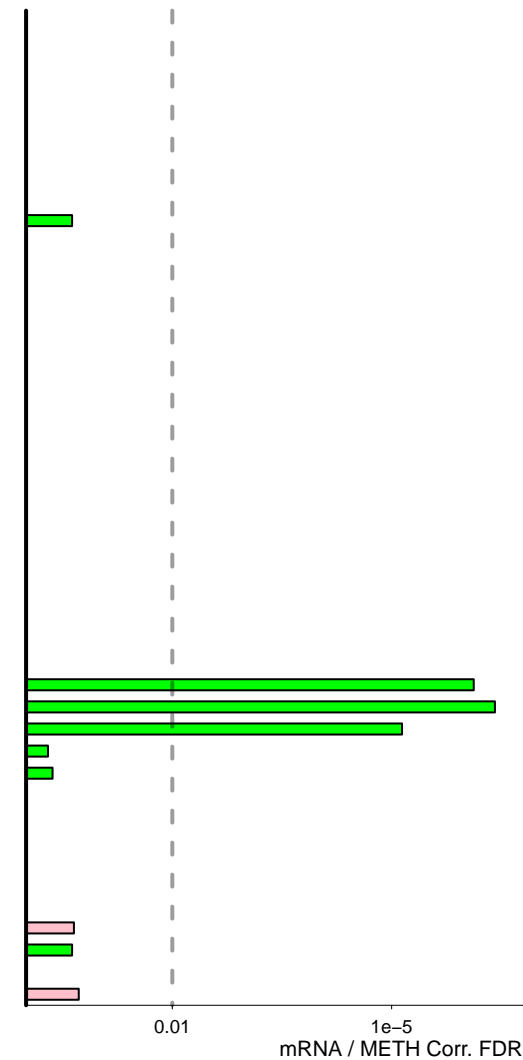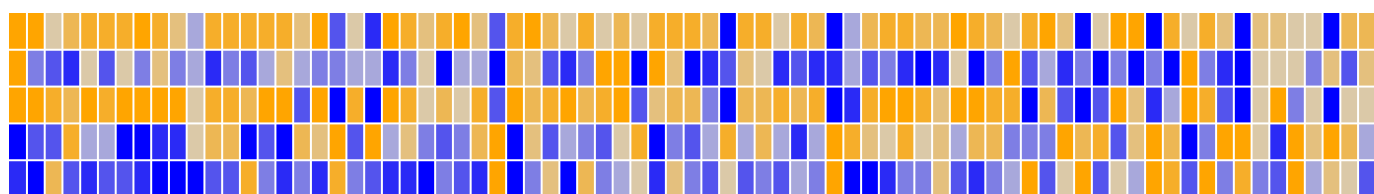

MITF  
SOX10  
TRPM1  
ZEB1  
AXL

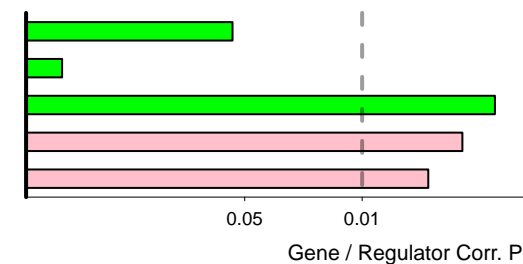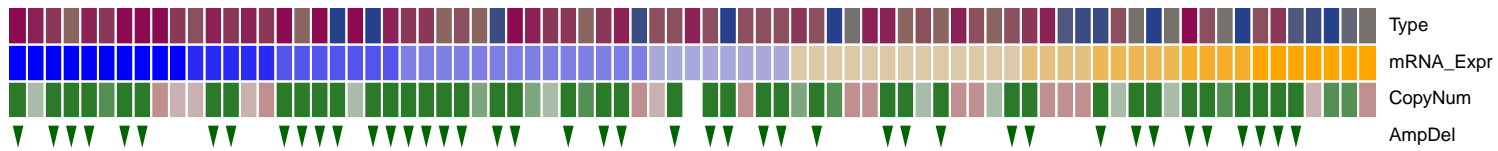

TCGA-GN-A8LL-06  
TCGA-ER-A3ES-06  
TCGA-3N-A9WB-06  
TCGA-FS-A4FB-06  
TCGA-EE-A3AD-06  
TCGA-FS-A1ZK-06  
TCGA-EE-A185-06  
TCGA-FS-A1ZG-06  
TCGA-GN-A8LK-06  
TCGA-FS-A4FO-06  
TCGA-D3-A8GV-06  
TCGA-FS-A1ZZ-06  
TCGA-EE-A29D-06  
TCGA-EE-A29E-06  
TCGA-RP-A695-06  
TCGA-GN-A4U7-06  
TCGA-FS-A4F5-06  
TCGA-D3-A6GL-06  
TCGA-LH-A5QB-06  
TCGA-D3-A6GK-06  
TCGA-ER-A4ZK-06  
TCGA-D9-A6EG-06  
TCGA-D3-A5GL-06  
TCGA-D3-A8GP-06  
TCGA-FS-A1ZJ-06  
TCGA-YG-AA3P-06  
TCGA-EE-A3J7-06  
TCGA-WE-A8K6-06  
TCGA-EE-A29L-06  
TCGA-EE-A180-06  
TCGA-D3-A1QA-06  
TCGA-W3-AA21-06  
TCGA-D9-A6EC-06  
TCGA-FR-A8YD-06  
TCGA-FS-A1ZY-06  
TCGA-EE-A3J8-06  
TCGA-EE-A17Z-06  
TCGA-ER-A19F-06  
TCGA-D3-A1QA-07  
TCGA-DA-A95Z-06  
TCGA-EE-A20H-06  
TCGA-D9-A1X3-06  
TCGA-FS-A1ZE-06  
TCGA-DA-A95W-06  
TCGA-EE-A3J1-06  
TCGA-FR-A7U8-06  
TCGA-EE-A2G0-06  
TCGA-EE-A20C-06  
TCGA-GN-A262-06  
TCGA-FS-A1YW-06  
TCGA-W3-A624-06  
TCGA-WE-A6JZ-06  
TCGA-D9-A4Z6-06  
TCGA-FS-A4F9-06  
TCGA-FS-A1Z3-06  
TCGA-D3-A8GI-06  
TCGA-EE-A2GR-06  
TCGA-ER-A19L-06  
TCGA-EE-A2MM-06  
TCGA-WE-A8ZQ-06  
TCGA-RP-A690-06  
TCGA-FW-A3I3-06  
TCGA-EE-A29A-06  
TCGA-D3-A8GC-06  
TCGA-DA-A1IA-06  
TCGA-D3-A1Q1-06  
TCGA-D3-A3C6-06  
TCGA-FS-A1ZC-06  
TCGA-FS-A1ZU-06  
TCGA-EE-A29B-06  
TCGA-WE-A8ZM-06  
TCGA-D3-A3M0-06  
TCGA-EE-A1O5-06  
TCGA-EE-A2A5-06  
TCGA-EE-A3AH-06

# ESM1

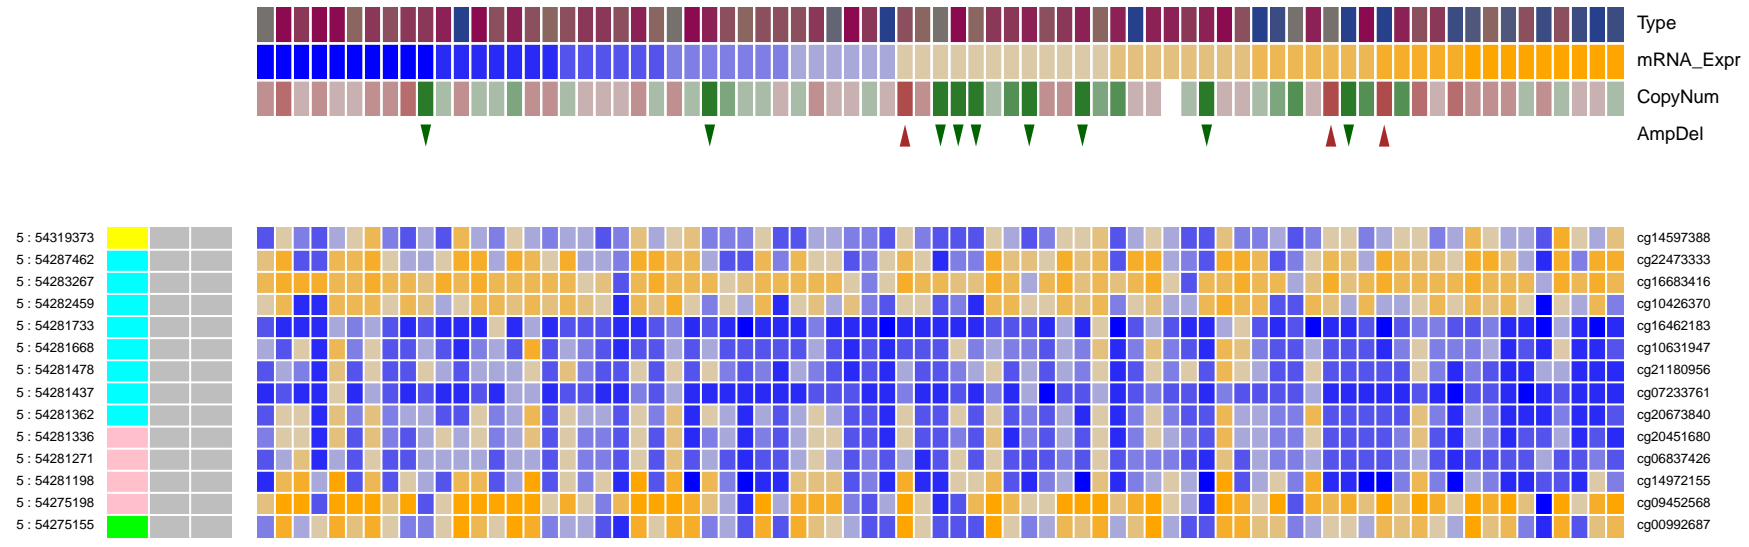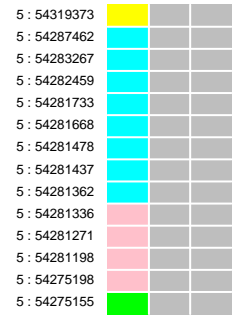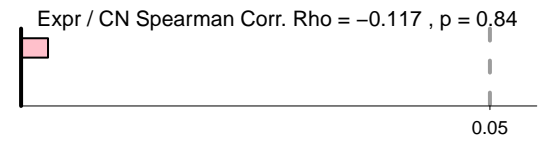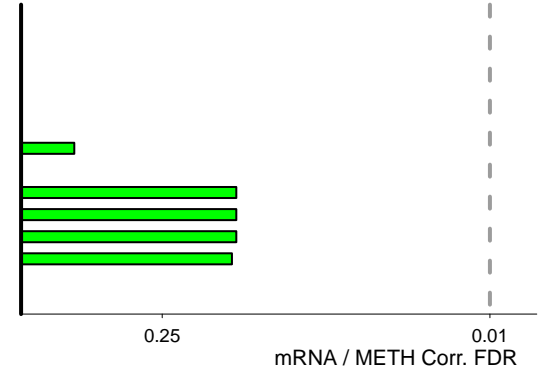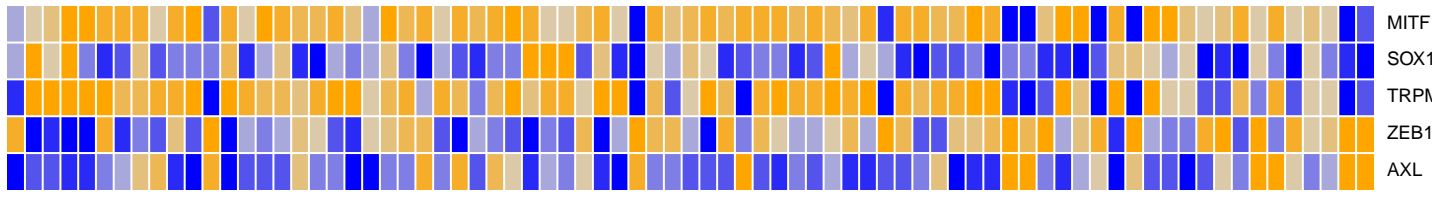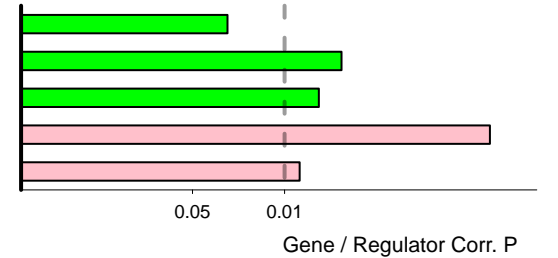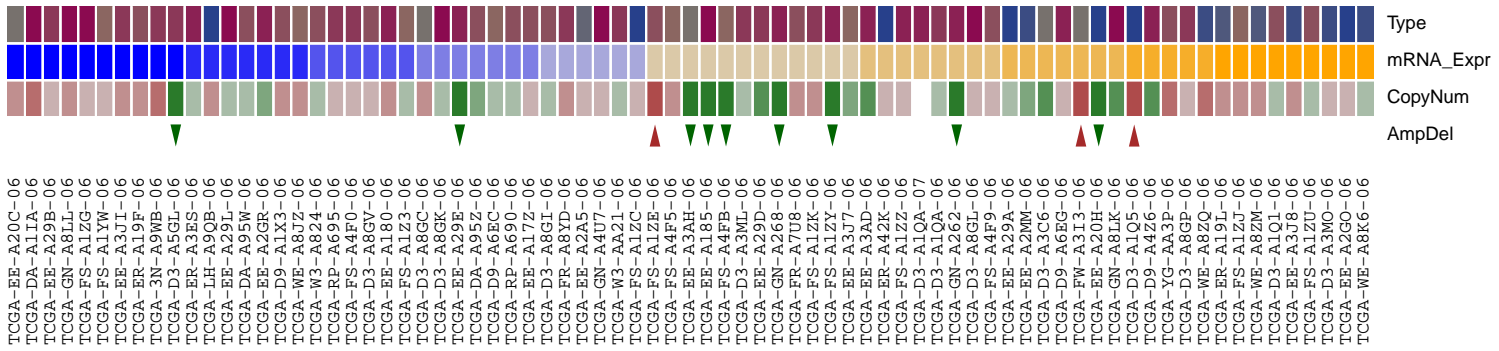

- TCGA-EE-A20C-06
- TCGA-DA-A1IA-06
- TCGA-EE-A29B-06
- TCGA-GN-A8LL-06
- TCGA-FS-A1ZG-06
- TCGA-FS-A1YW-06
- TCGA-EE-A3JI-06
- TCGA-ER-A19F-06
- TCGA-3N-A9WB-06
- TCGA-D3-A5GL-06
- TCGA-ER-A3ES-06
- TCGA-LH-A9OB-06
- TCGA-EE-A29L-06
- TCGA-DA-A95W-06
- TCGA-EE-A2GR-06
- TCGA-D9-A1Y3-06
- TCGA-WE-A87Z-06
- TCGA-W3-A824-06
- TCGA-RP-A695-06
- TCGA-FS-A4FU-06
- TCGA-D3-A6GV-06
- TCGA-EE-A180-06
- TCGA-FS-A1Z3-06
- TCGA-D3-A8GC-06
- TCGA-D3-A8GK-06
- TCGA-EE-A29E-06
- TCGA-DA-A95Z-06
- TCGA-D9-A6FC-06
- TCGA-RP-A690-06
- TCGA-EE-A17Z-06
- TCGA-D3-A8G1-06
- TCGA-FR-A8YD-06
- TCGA-EE-A2A5-06
- TCGA-GN-AAU7-06
- TCGA-W3-AA21-06
- TCGA-FS-A1ZC-06
- TCGA-FS-A4F5-06
- TCGA-EE-A3AH-06
- TCGA-EE-A185-06
- TCGA-FS-A4FB-06
- TCGA-D3-A3ML-06
- TCGA-EE-A29D-06
- TCGA-GN-A268-06
- TCGA-FR-A7U8-06
- TCGA-FS-A1ZK-06
- TCGA-FS-A1ZY-06
- TCGA-EE-A377-06
- TCGA-EE-A3AD-06
- TCGA-FR-A42K-06
- TCGA-FS-A1ZZ-06
- TCGA-D3-A1QA-07
- TCGA-D3-A1QA-06
- TCGA-GN-A282-06
- TCGA-FS-A4F9-06
- TCGA-EE-A29A-06
- TCGA-EE-A2MM-06
- TCGA-D3-A3C6-06
- TCGA-D9-A6EG-06
- TCGA-FW-A313-06
- TCGA-EE-A20H-06
- TCGA-GN-A8LK-06
- TCGA-D3-A1Q5-06
- TCGA-D9-A4Z6-06
- TCGA-YG-AA3P-06
- TCGA-D3-A8GP-06
- TCGA-WE-A8ZQ-06
- TCGA-ER-A19L-06
- TCGA-FS-A1ZJ-06
- TCGA-WE-A8ZM-06
- TCGA-D3-A1Q1-06
- TCGA-EE-A378-06
- TCGA-FS-A1ZU-06
- TCGA-D3-A3M0-06
- TCGA-EE-A2GO-06
- TCGA-WE-A8K6-06

# SERPINB7

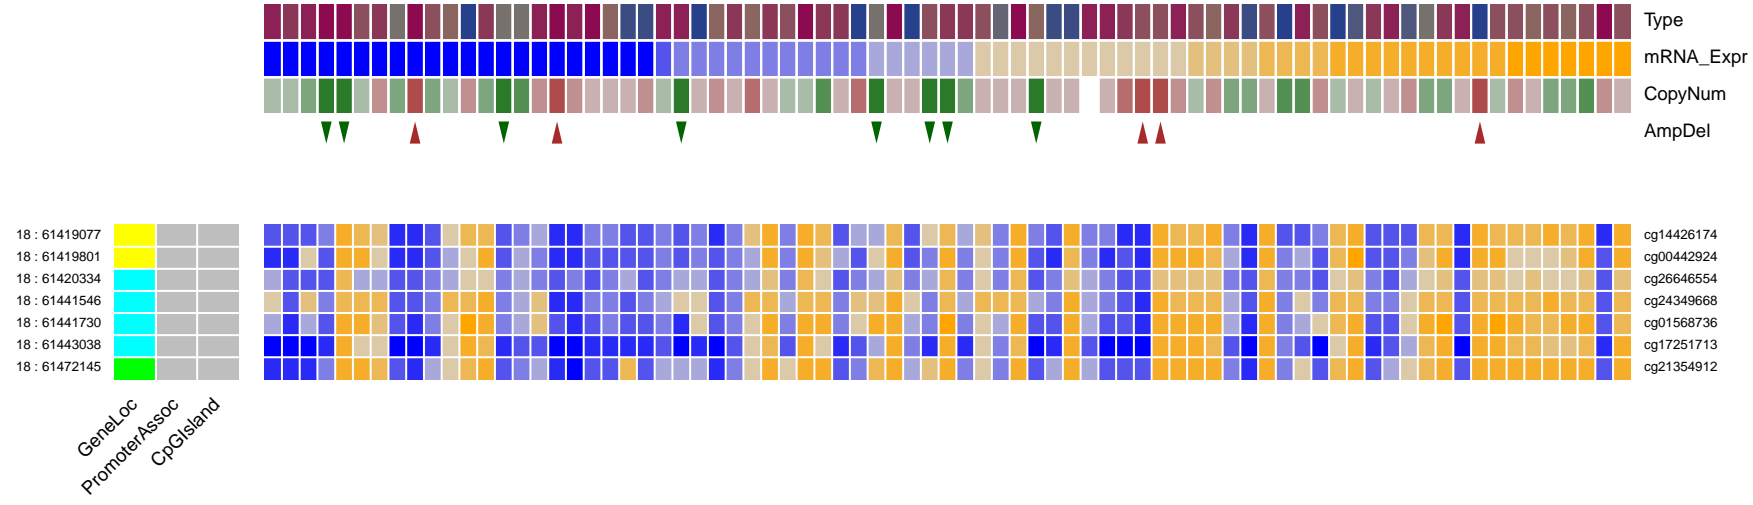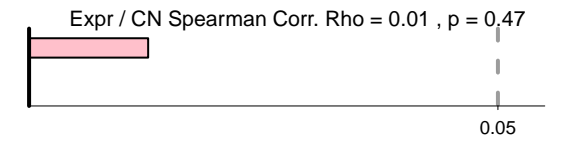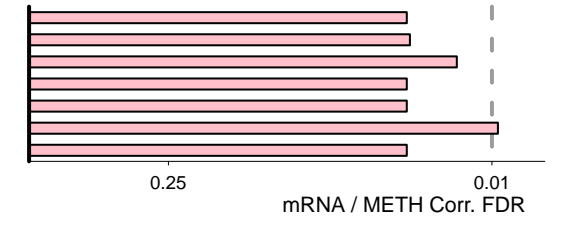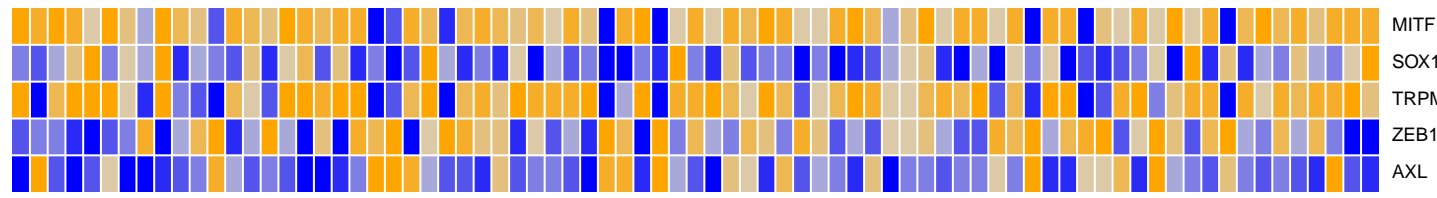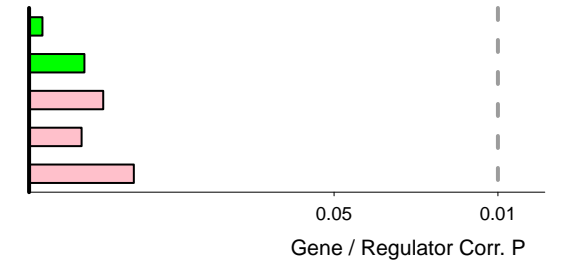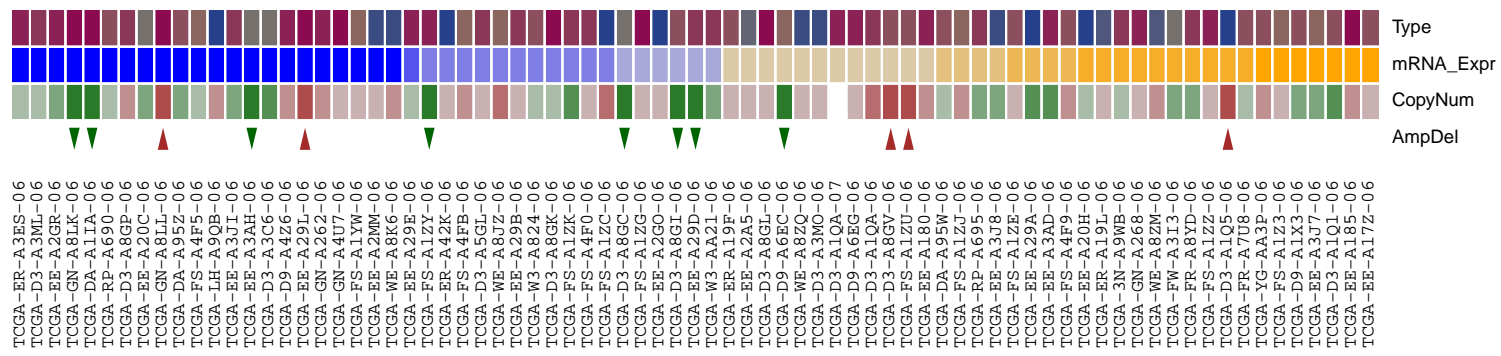

# PLPP3

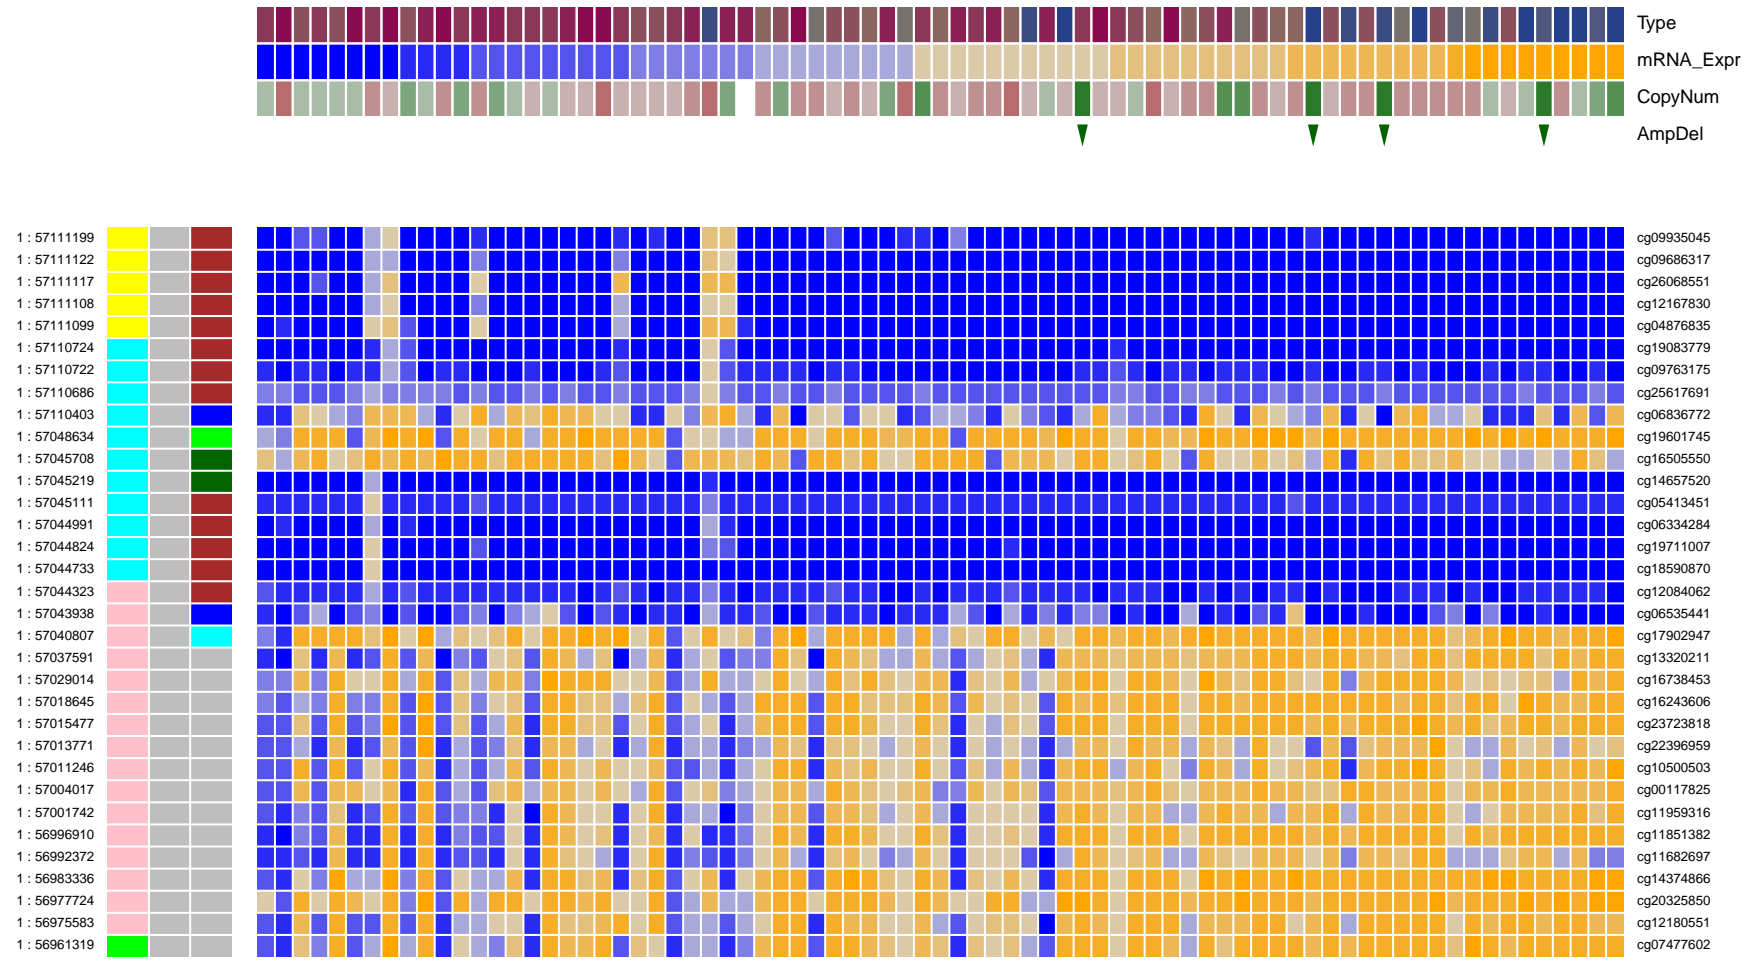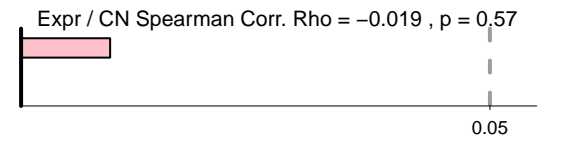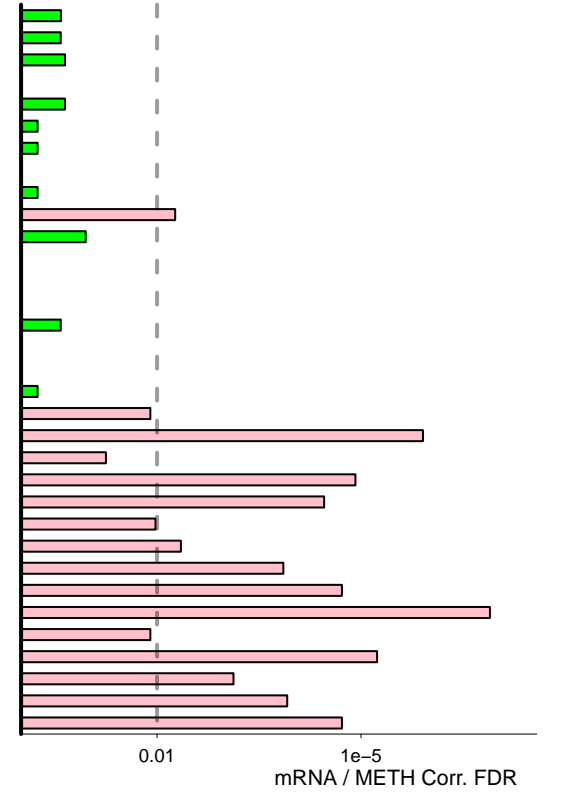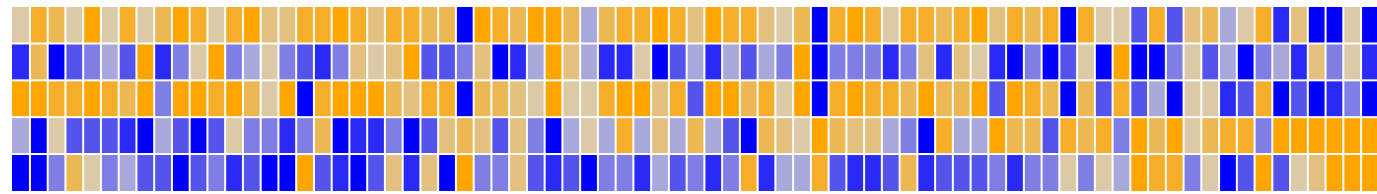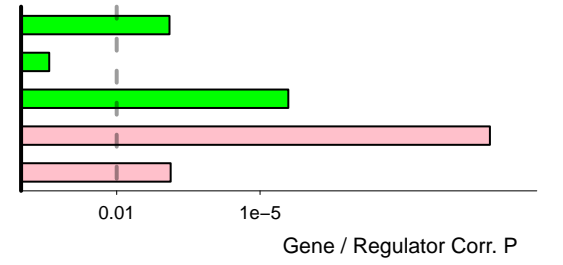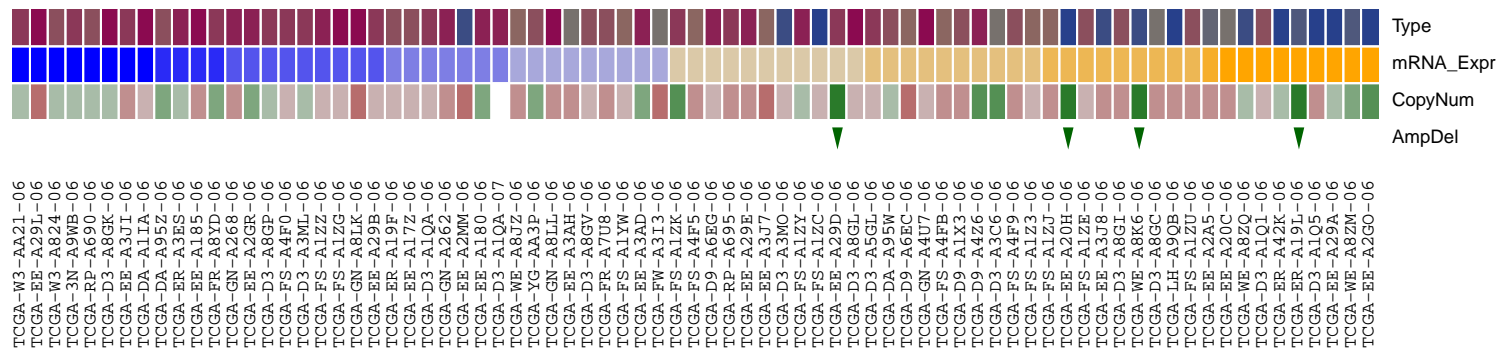

# TGFBI

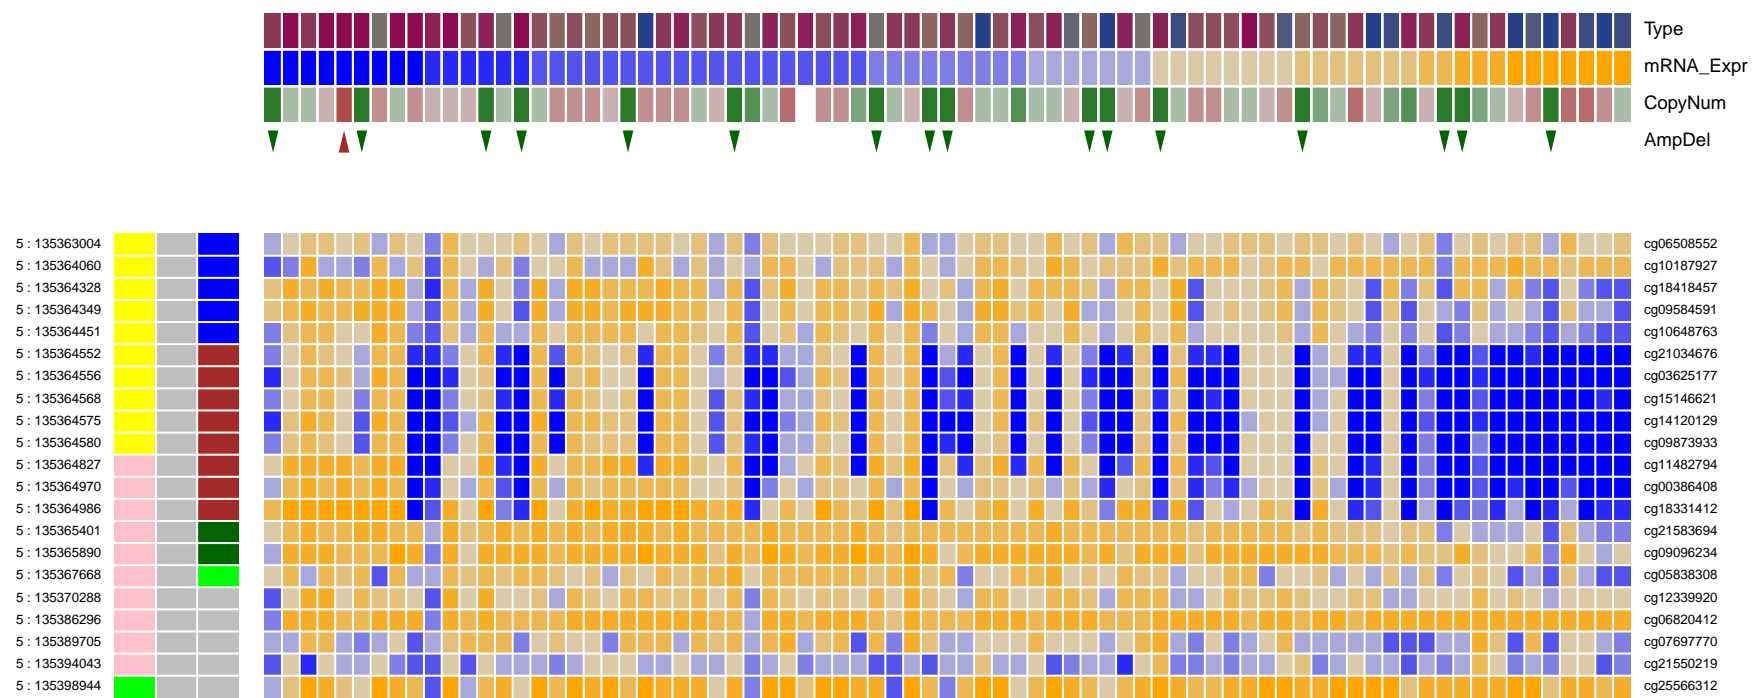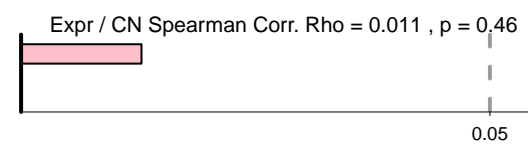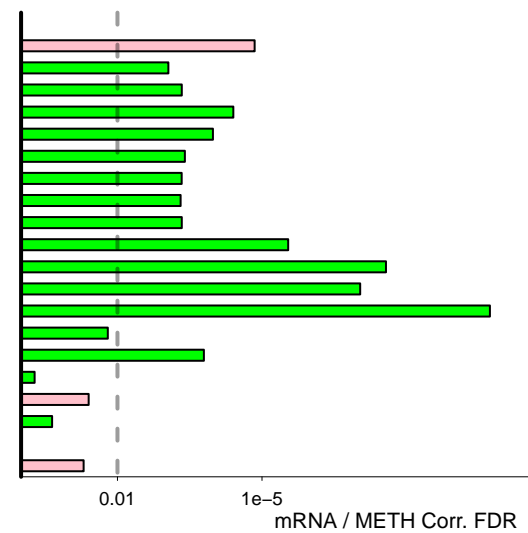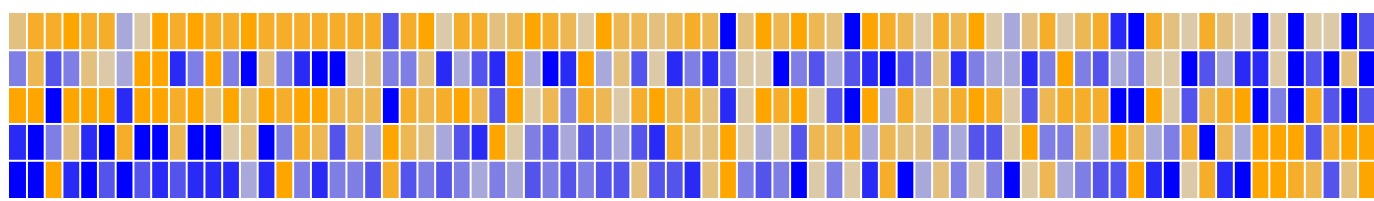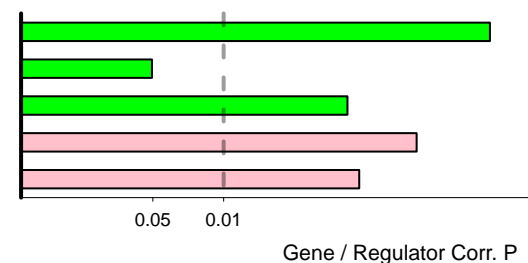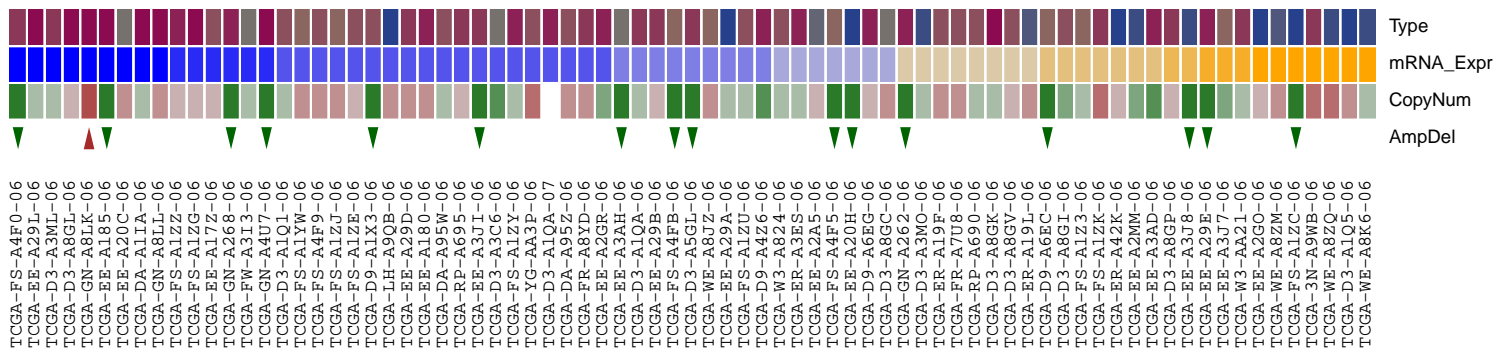

Supplement: 41467_2022_31510_MOESM13_ESM.pdf [file 41467_2022_31510_MOESM13_ESM.pdf]
