# Supplementary material for: Multi-modal molecular programs regulate melanoma cell state
Source: PubMed Central journal article supplement (PMC9271073; doi:10.1038/s41467-022-31510-1), 2022-07-09
Supplement: 41467_2022_31510_MOESM10_ESM.pdf [file 41467_2022_31510_MOESM10_ESM.pdf]

**Supplementary Data 7: MEL gene regulatory influences - MDACC cell lines.**

# PMEL

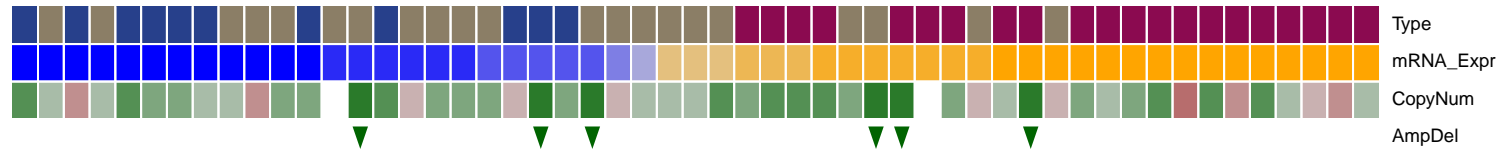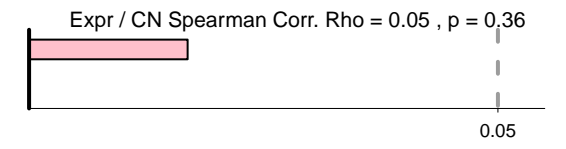

12 : 56365978  
 12 : 56365894  
 12 : 56365823  
 12 : 56364837  
 12 : 56360065  
 12 : 56359916  
 12 : 56359450  
 12 : 56359406  
 12 : 56359210  
 12 : 56359158  
 12 : 56357818  
 12 : 56350385

GeneLoc  
 PromoterAssoc  
 CpGIsland

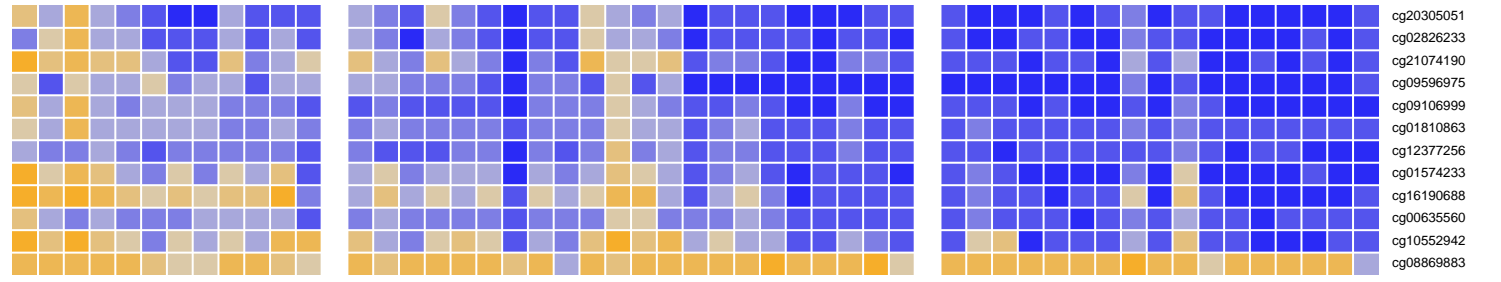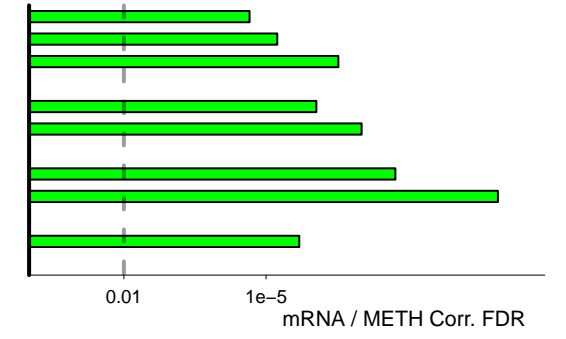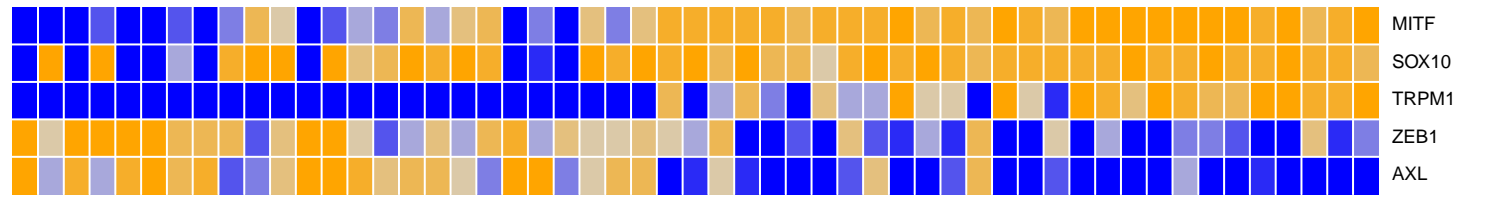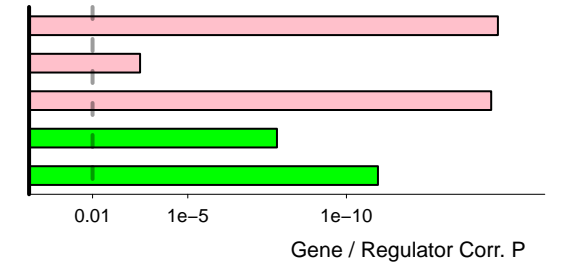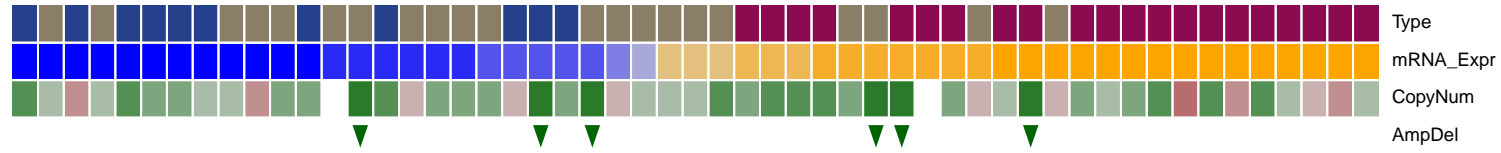

S2770A  
 S2549  
 S2470  
 S2495  
 S2261  
 S2125  
 S2583  
 S2338  
 S2645  
 S2392  
 S2365  
 S2356  
 S2350  
 S2800  
 S2405  
 S2410  
 S2650  
 S2812  
 S2380  
 S2688  
 S2731  
 S2686  
 S2767  
 S2654  
 S2153  
 S2596  
 S2734  
 S2381  
 S2508  
 S2373  
 S2761  
 S2357  
 S2247  
 S2097  
 S2521  
 S2667  
 S2668  
 S2423  
 S2408  
 S2189  
 S2333  
 S2374  
 S2216  
 S2279  
 S2391  
 S2320  
 S2718  
 S2406  
 S2330  
 S2400  
 S2379  
 S2510  
 S2765

Type  
 mRNA\_Expr  
 CopyNum  
 AmpDel

# MITF

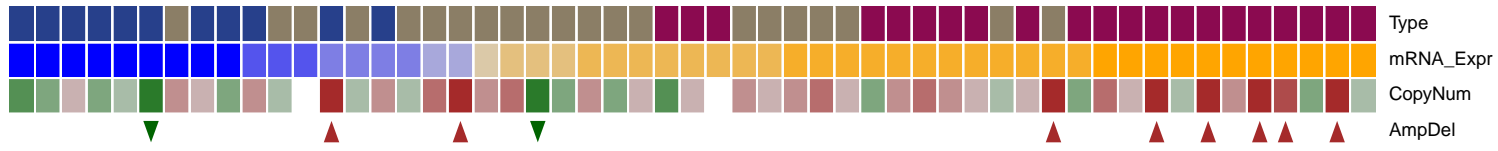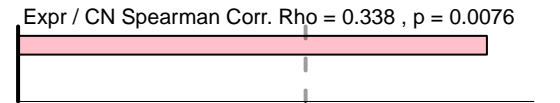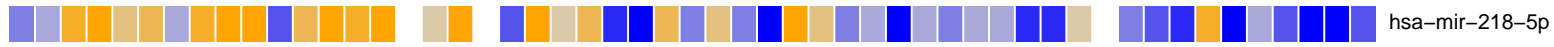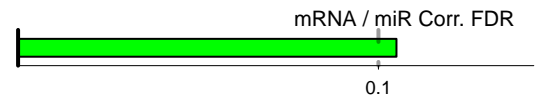

3 : 69789955  
3 : 69792875  
3 : 69797108  
3 : 69811645  
3 : 69812125  
3 : 69812798  
3 : 69812885  
3 : 69819855  
3 : 69822512  
3 : 69824707  
3 : 69834386  
3 : 69914738  
3 : 69915189  
3 : 69915302  
3 : 69915406  
3 : 69915449  
3 : 69924342  
3 : 69928232  
3 : 69932052  
3 : 69942668  
3 : 69974592  
3 : 69985202  
3 : 69985375  
3 : 69985594  
3 : 69990481  
3 : 69994982  
3 : 69997232  
3 : 70008488  
3 : 70008521  
3 : 70008541  
3 : 70016979

GeneLoc  
PromoterAssoc  
CpIsland

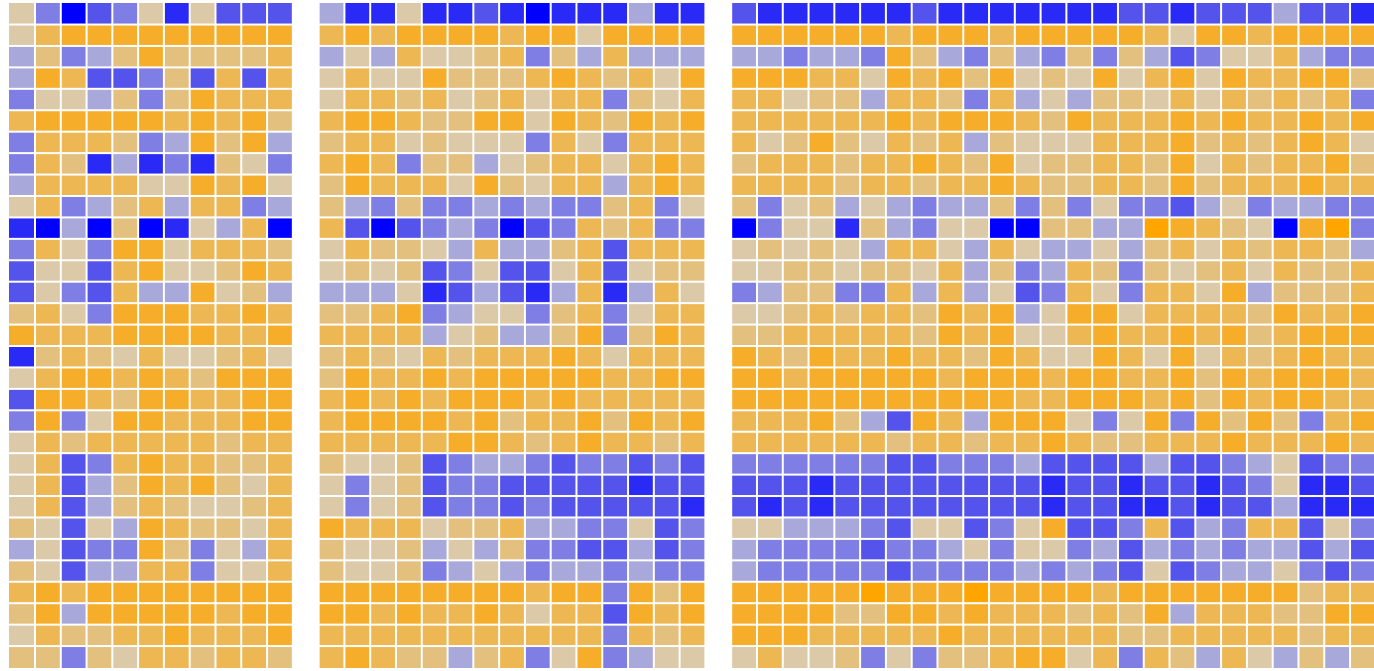

cg12466700  
cg21178333  
cg18496212  
cg15909737  
cg15449049  
cg06070625  
cg09325003  
cg03489020  
cg22875984  
cg17482117  
cg04811592  
cg11287400  
cg13151171  
cg03831180  
cg18503031  
cg13523819  
cg08652499  
cg04535746  
cg03851970  
cg06789445  
cg01793161  
cg16905280  
cg11038507  
cg06640206  
cg13636907  
cg07317047  
cg02643677  
cg12441997  
cg25129985  
cg09678667  
cg24874749

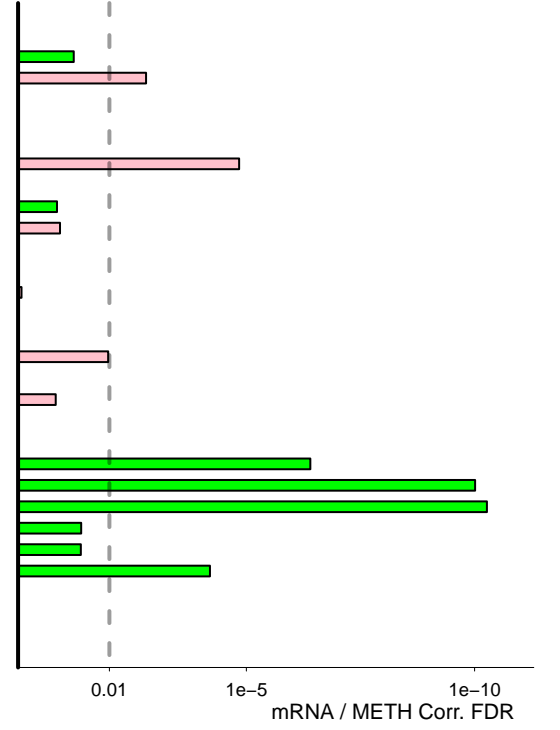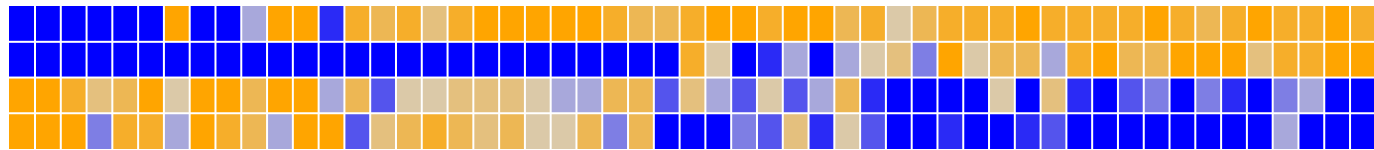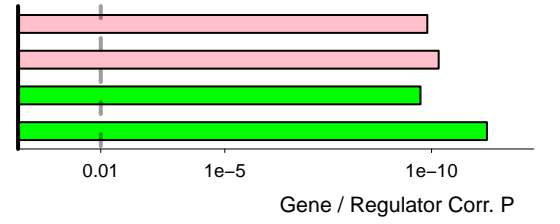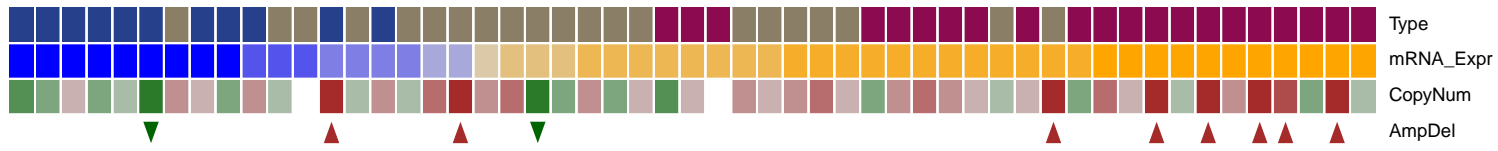

S2770A  
S2356  
S2688  
S2686  
S2338  
S2470  
S2549  
S2125  
S2261  
S2583  
S2495  
S2350  
S2731  
S2645  
S2405  
S2654  
S2800  
S2650  
S2365  
S2153  
S2767  
S2812  
S2410  
S2380  
S2423  
S2761  
S2379  
S2667  
S2392  
S2333  
S2097  
S2734  
S2381  
S2668  
S2357  
S2373  
S2330  
S2189  
S2596  
S2508  
S2247  
S2510  
S2391  
S2406  
S2718  
S2408  
S2765  
S2521  
S2279  
S2320  
S2216  
S2400  
S2374

# TYR

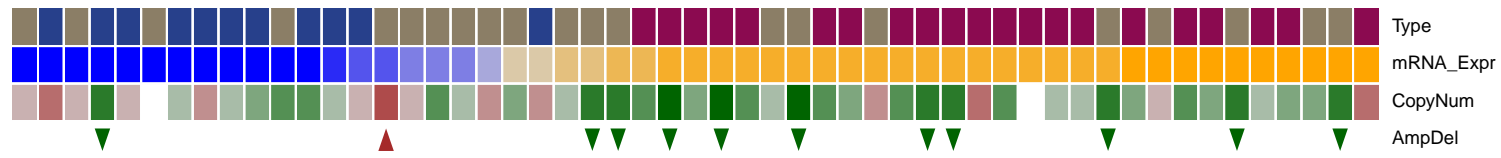

11:88910913  
11:88911467

GeneLoc  
PromoterAssoc  
CpGIsland

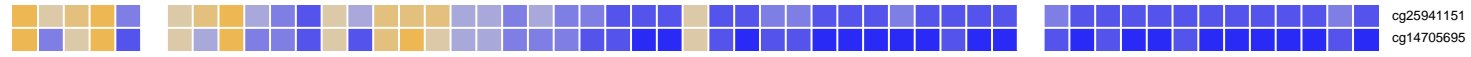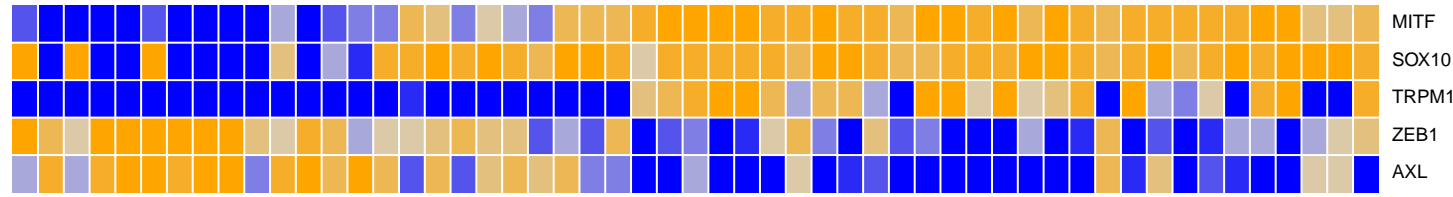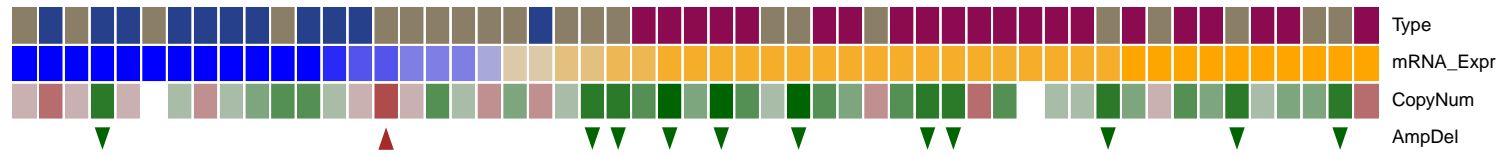

S2495  
S2338  
S2549  
S2470  
S2770A  
S2350  
S2261  
S2125  
S2356  
S2686  
S2800  
S2688  
S2583  
S2731  
S2654  
S2333  
S2153  
S2645  
S2365  
S2650  
S2405  
S2410  
S2392  
S2380  
S2357  
S2406  
S2320  
S2408  
S2521  
S2596  
S2381  
S2718  
S2508  
S2247  
S2761  
S2765  
S2391  
S2189  
S2374  
S2667  
S2279  
S2510  
S2423  
S2330  
S2097  
S2373  
S2668  
S2734  
S2216  
S2400  
S2812  
S2767  
S2379

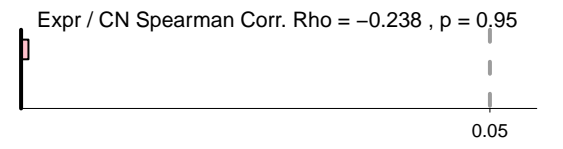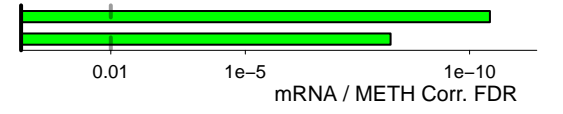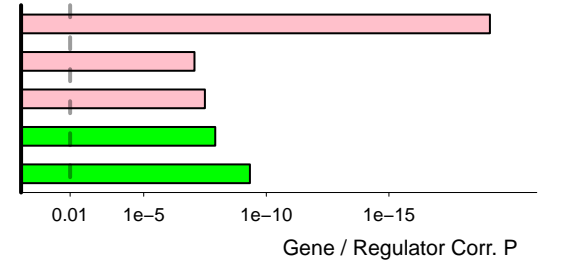

# MLANA

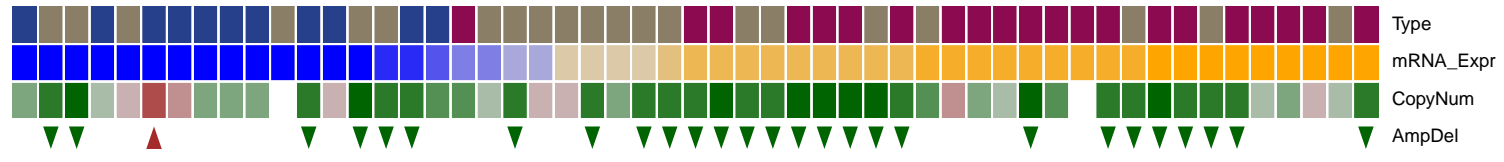

9: 5890866  
9: 5890900  
9: 5891258  
9: 5893907

GeneLoc  
PromoterAssoc  
CpGIsland

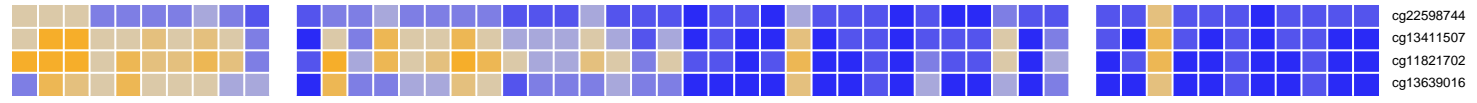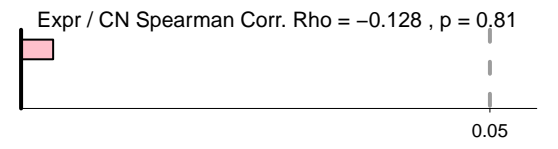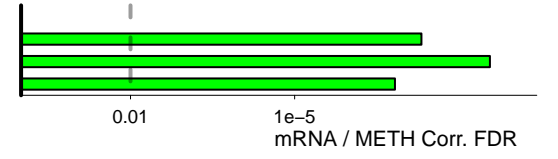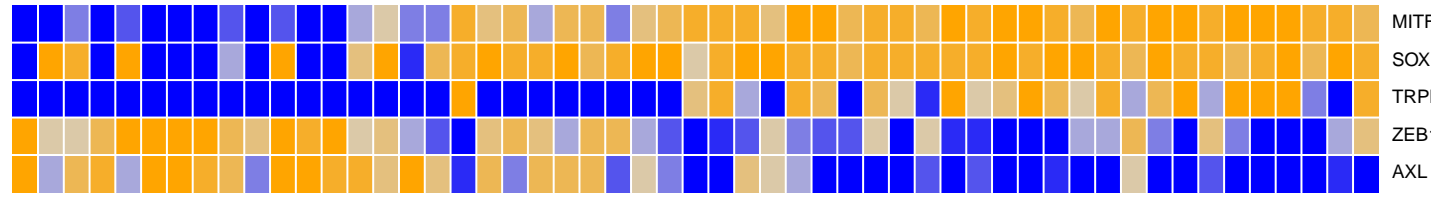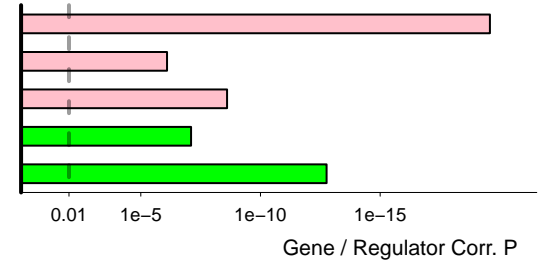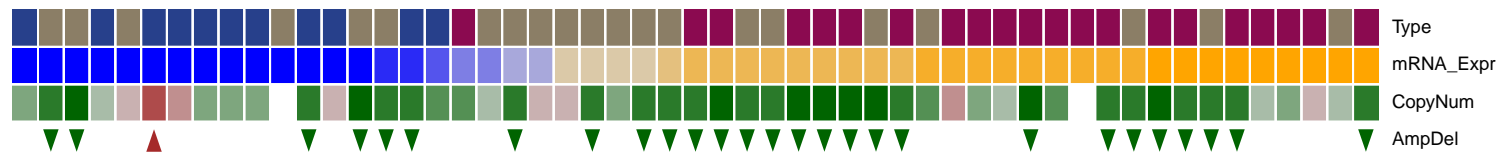

S2356  
S2549  
S2654  
S2338  
S2495  
S2125  
S2770A  
S2261  
S2583  
S2686  
S2350  
S2688  
S2470  
S2800  
S2365  
S2731  
S2405  
S2330  
S2153  
S2380  
S2650  
S2410  
S2423  
S2645  
S2812  
S2392  
S2357  
S2510  
S2097  
S2767  
S2320  
S2406  
S2761  
S2596  
S2189  
S2333  
S2521  
S2668  
S2279  
S2408  
S2508  
S2667  
S2216  
S2381  
S2718  
S2374  
S2247  
S2765  
S2391  
S2400  
S2373  
S2734  
S2379

# CDK2

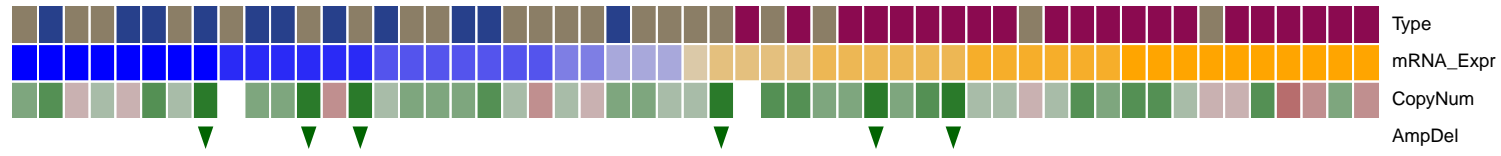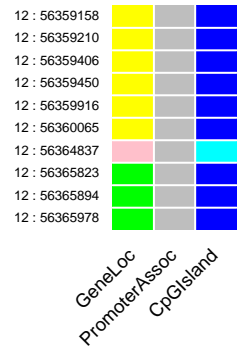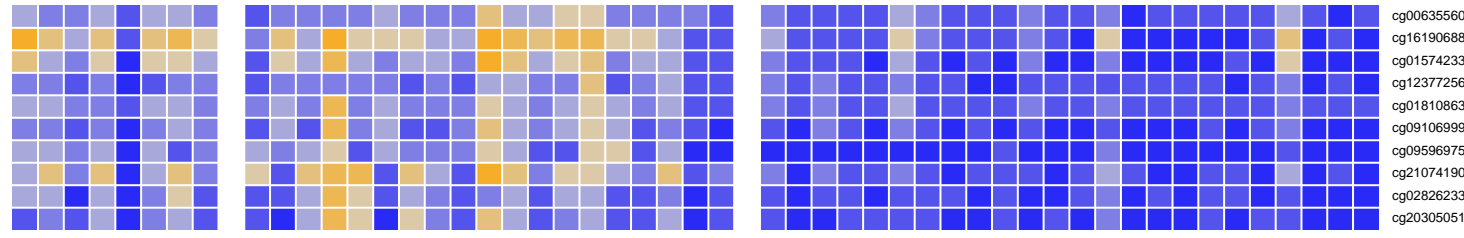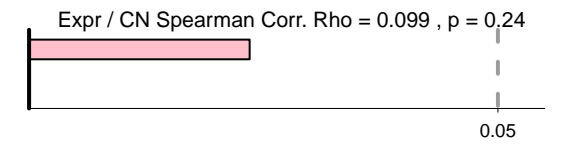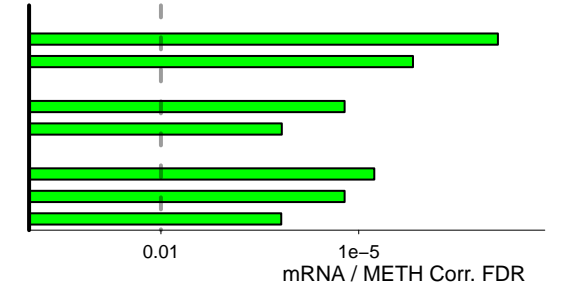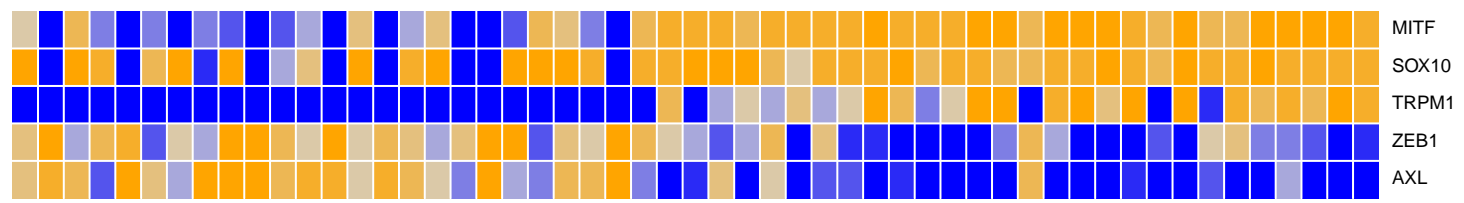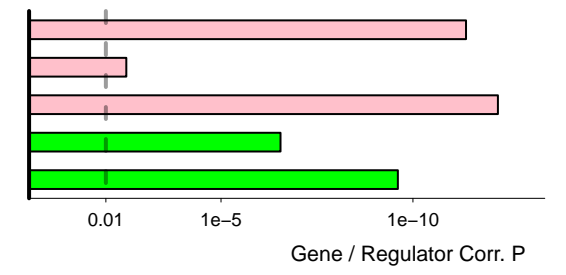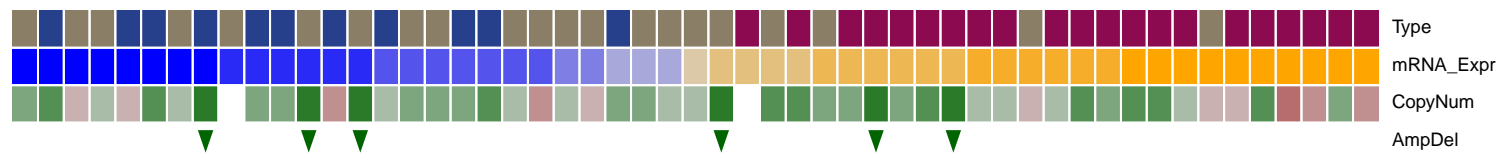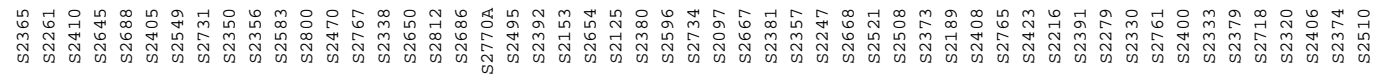

# TTYH2

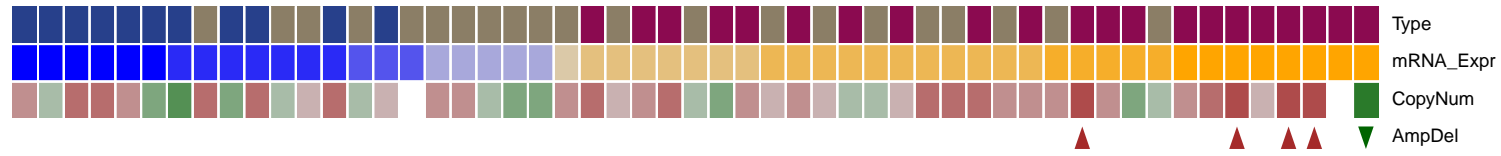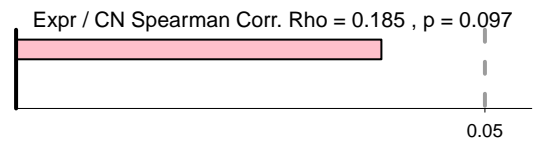

17 : 72208213  
 17 : 72208322  
 17 : 72208433  
 17 : 72208504  
 17 : 72208788  
 17 : 72209156  
 17 : 72209198  
 17 : 72210278  
 17 : 72210343  
 17 : 72210669  
 17 : 72210927  
 17 : 72212478  
 17 : 72231318  
 17 : 72231400  
 17 : 72231448  
 17 : 72237019  
 17 : 72241818  
 17 : 72244242  
 17 : 72244366  
 17 : 72244690  
 17 : 72244939  
 17 : 72245470  
 17 : 72245578  
 17 : 72253502  
 17 : 72257002

GeneLoc  
 PromoterAssoc  
 CpGIsland

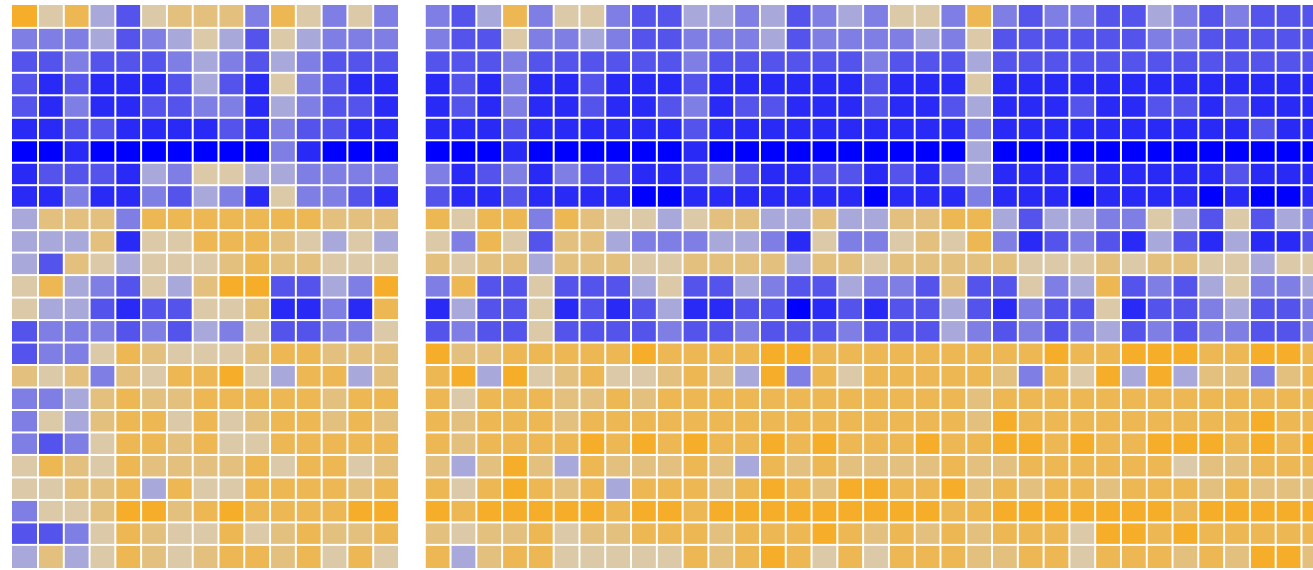

cg02186277  
 cg23632849  
 cg19008858  
 cg15566554  
 cg05264148  
 cg19598544  
 cg14506834  
 cg18871289  
 cg13727849  
 cg02632542  
 cg25422089  
 cg25060035  
 cg08594554  
 cg11763830  
 cg07739851  
 cg03018256  
 cg04007987  
 cg02751064  
 cg21485555  
 cg01993847  
 cg23460124  
 cg12253634  
 cg01910527  
 cg19433487  
 cg23740610

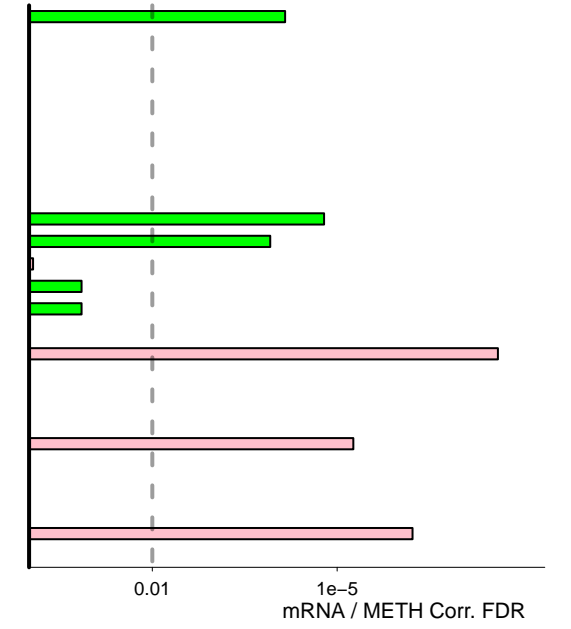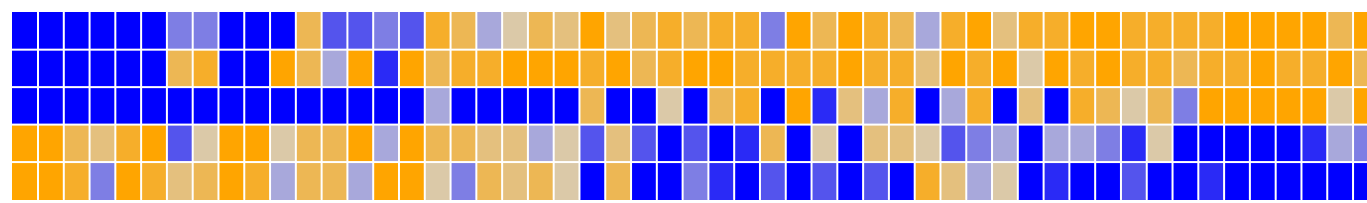

MITF  
 SOX10  
 TRPM1  
 ZEB1  
 AXL

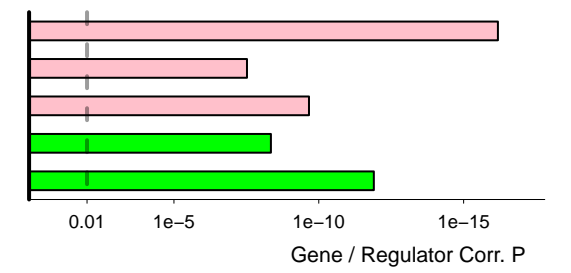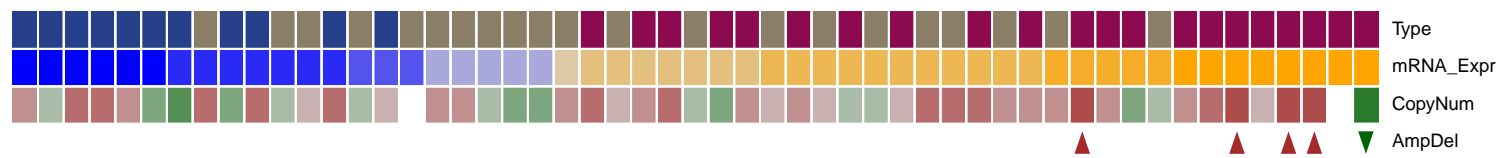

S2125  
 S2356  
 S2338  
 S2686  
 S2688  
 S2261  
 S2405  
 S2654  
 S2770A  
 S2470  
 S2549  
 S2423  
 S2583  
 S2495  
 S2731  
 S2350  
 S2381  
 S2380  
 S2650  
 S2365  
 S2410  
 S2767  
 S2406  
 S2153  
 S2761  
 S2189  
 S2392  
 S2508  
 S2510  
 S2645  
 S2374  
 S2333  
 S2279  
 S2247  
 S2379  
 S2800  
 S2097  
 S2320  
 S2812  
 S2357  
 S2734  
 S2216  
 S2718  
 S2668  
 S2596  
 S2373  
 S2330  
 S2391  
 S2400  
 S2408  
 S2521  
 S2667  
 S2765

Type  
 mRNA\_Expr  
 CopyNum  
 AmpDel

# SLC24A5

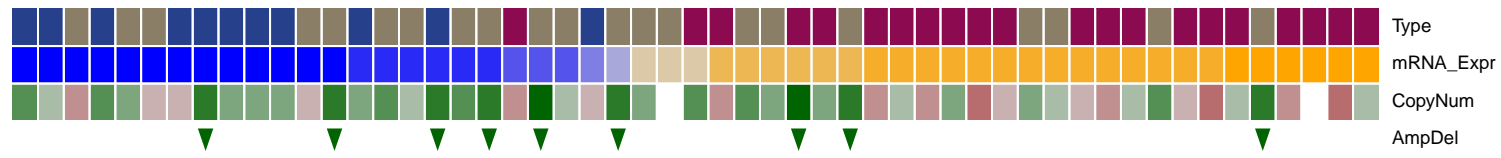

15 : 48411862  
 15 : 48412241  
 15 : 48413040  
 15 : 48413049  
 15 : 48413102  
 15 : 48413218  
 15 : 48413344  
 15 : 48429067  
 15 : 48429733

GeneLoc  
 PromoterAssoc  
 CpGIsland

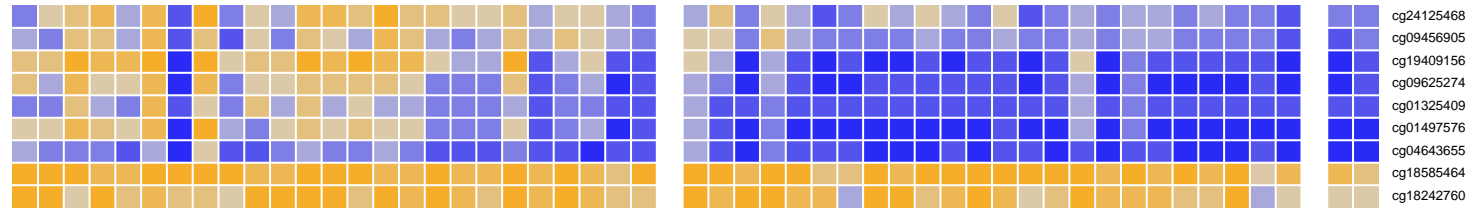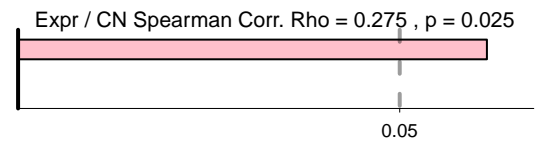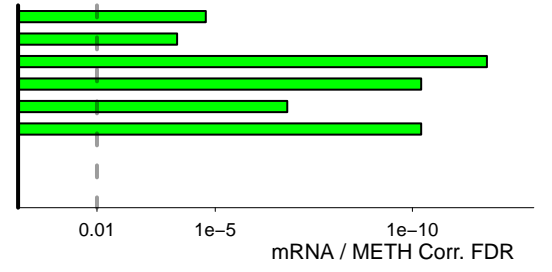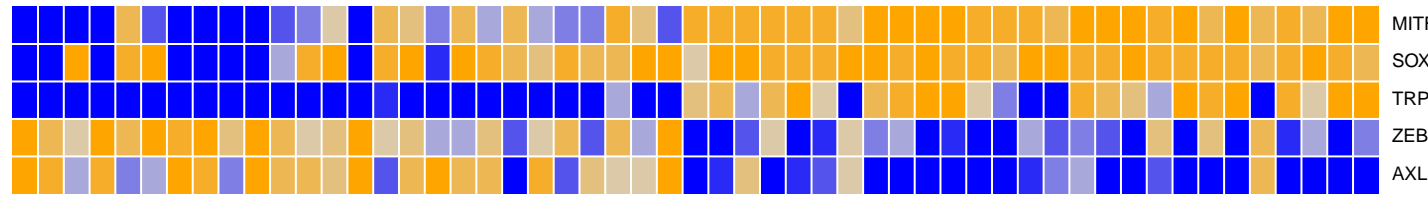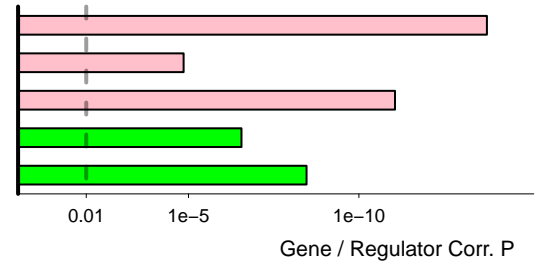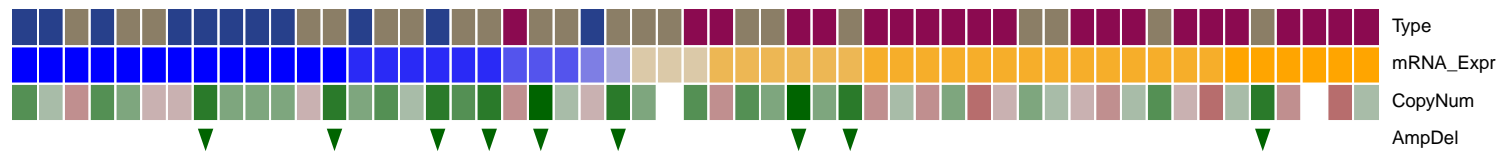

S2770A  
 S2338  
 S2549  
 S2261  
 S2380  
 S2495  
 S2688  
 S2470  
 S2686  
 S2356  
 S2583  
 S2654  
 S2365  
 S2125  
 S2333  
 S2153  
 S2731  
 S2410  
 S2650  
 S2761  
 S2800  
 S2645  
 S2405  
 S2381  
 S2812  
 S2350  
 S2357  
 S2508  
 S2097  
 S2596  
 S2330  
 S2668  
 S2767  
 S2718  
 S2216  
 S2400  
 S2521  
 S2189  
 S2373  
 S2734  
 S2392  
 S2320  
 S2406  
 S2279  
 S2247  
 S2374  
 S2379  
 S2408  
 S2423  
 S2510  
 S2667  
 S2391  
 S2765



# RRAGD

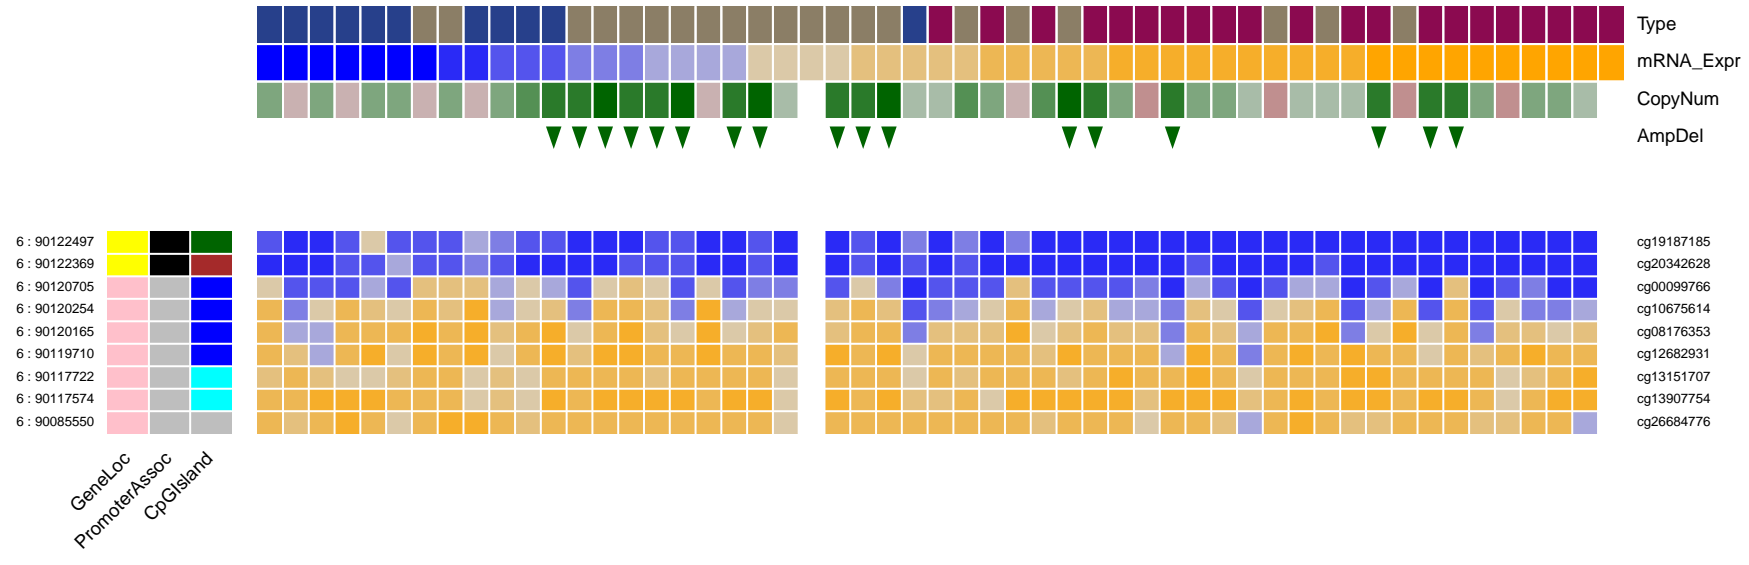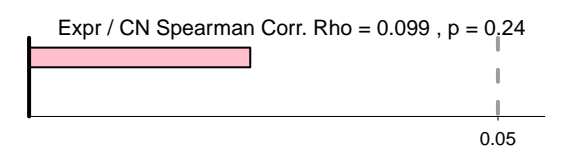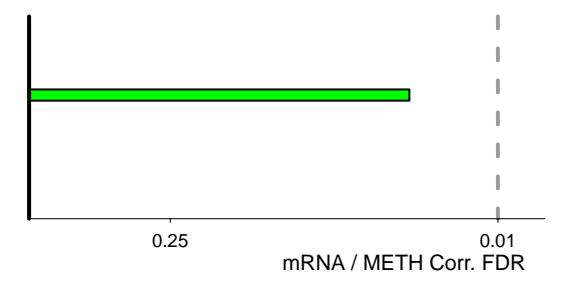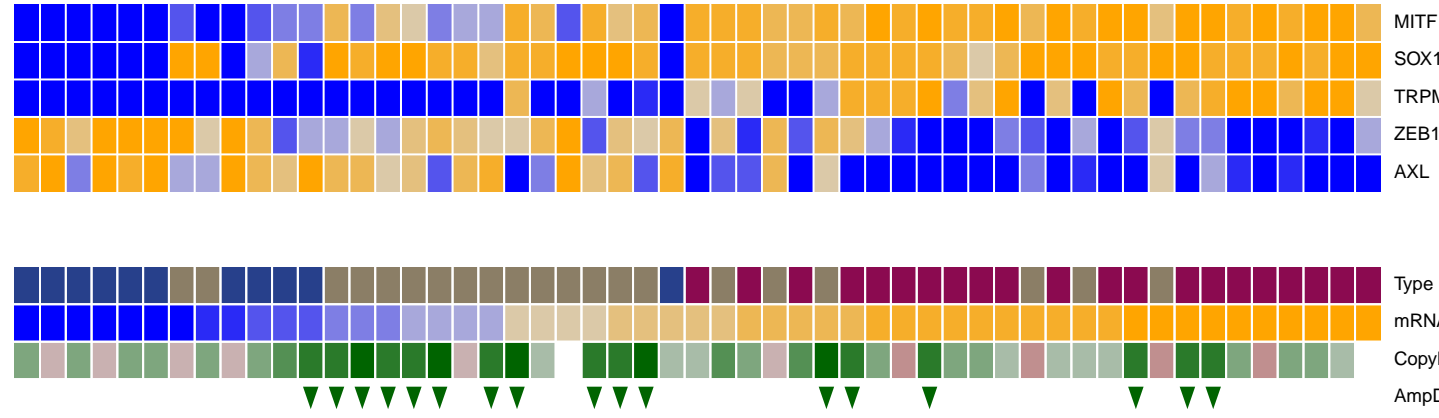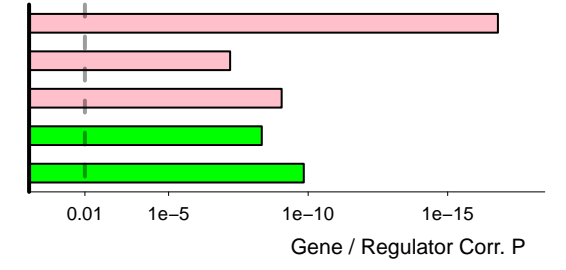

- S2261
- S2688
- S2686
- S2125
- S2470
- S2356
- S2495
- S2549
- S2770A
- S2583
- S2405
- S2731
- S2410
- S2654
- S2812
- S2365
- S2645
- S2650
- S2800
- S2596
- S2380
- S2350
- S2097
- S2153
- S2333
- S2338
- S2189
- S2247
- S2668
- S2423
- S2761
- S2381
- S2379
- S2216
- S2510
- S2391
- S2373
- S2357
- S2765
- S2392
- S2279
- S2734
- S2408
- S2406
- S2767
- S2718
- S2320
- S2330
- S2374
- S2508
- S2521
- S2400
- S2667

# TRIM63

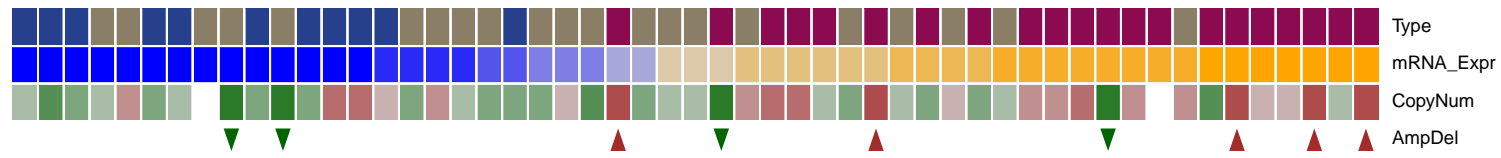

1:26394593  
1:26394435  
1:26394300  
1:26394211  
1:26394201  
1:26394083  
1:26394009  
1:26392876  
1:26377899

GeneLoc  
PromoterAssoc  
CpIsland

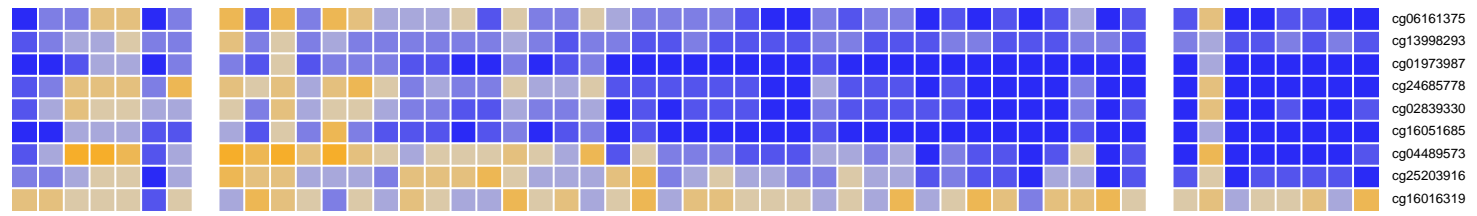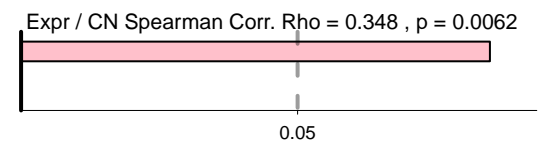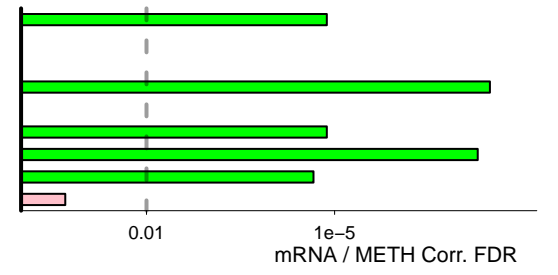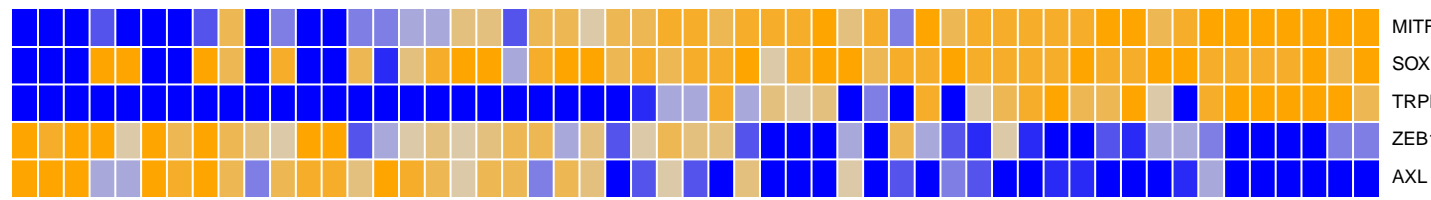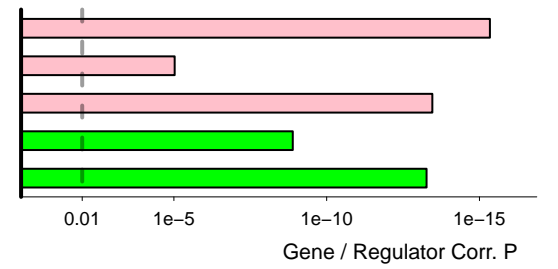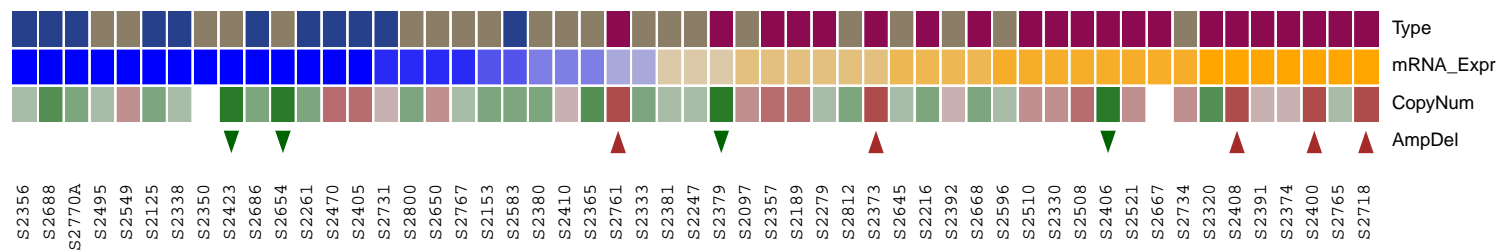

S2356  
S2688  
S2770A  
S2495  
S2549  
S2125  
S2338  
S2350  
S2423  
S2686  
S2654  
S2261  
S2470  
S2405  
S2731  
S2800  
S2650  
S2767  
S2153  
S2583  
S2380  
S2410  
S2365  
S2761  
S2333  
S2381  
S2247  
S2379  
S2097  
S2357  
S2189  
S2279  
S2812  
S2373  
S2645  
S2216  
S2392  
S2668  
S2596  
S2510  
S2330  
S2508  
S2406  
S2521  
S2667  
S2734  
S2320  
S2408  
S2391  
S2374  
S2400  
S2765  
S2718

# GPM6B

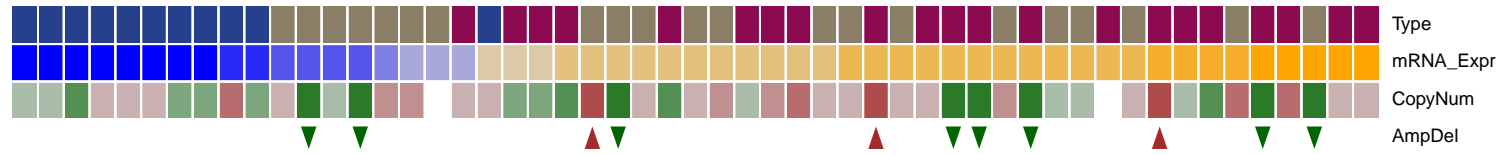

X: 13957590  
X: 13957417  
X: 13957233  
X: 13957159  
X: 13955553  
X: 13955102  
X: 13954890  
X: 13952329  
X: 13835568  
X: 13835295  
X: 13835264  
X: 13835207  
X: 13835198  
X: 13821440

GeneLoc  
PromoterAssoc  
CpGIsland

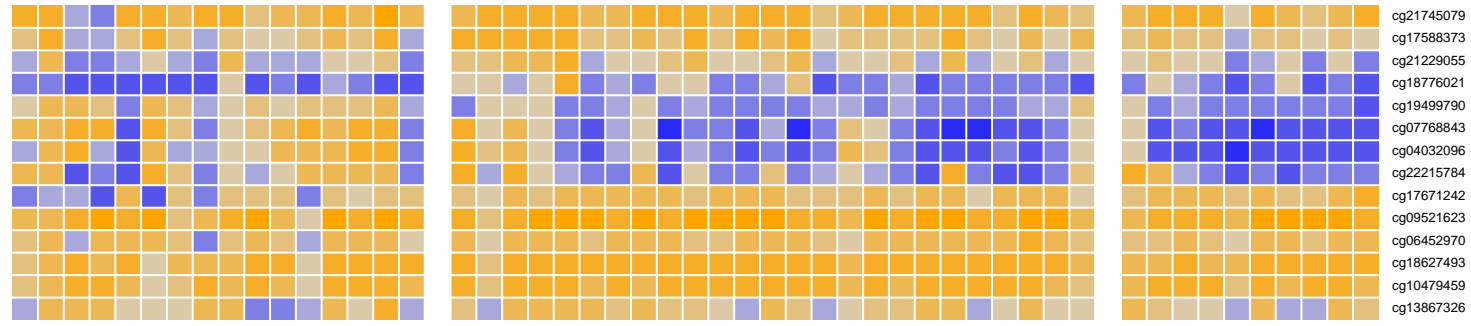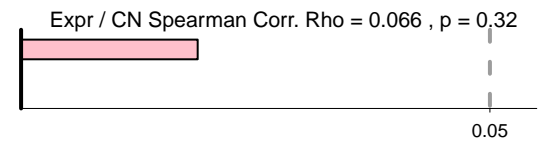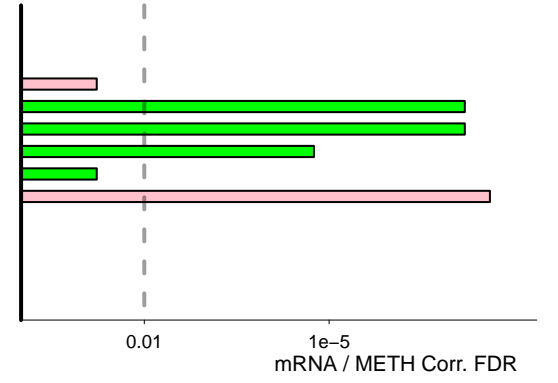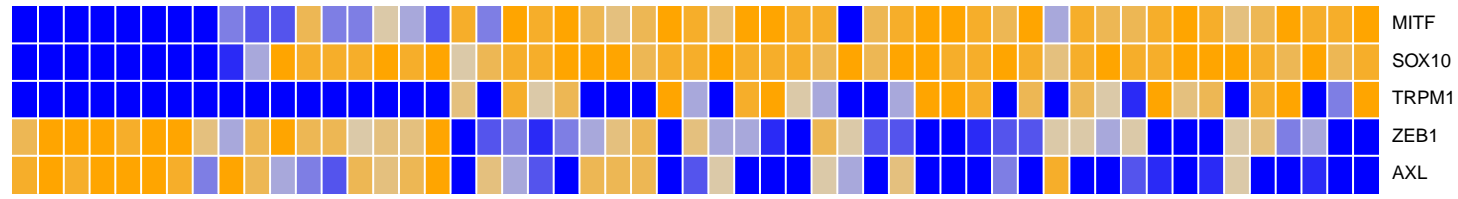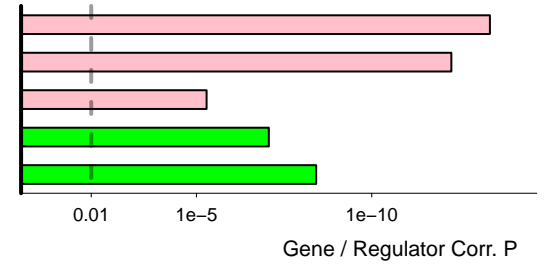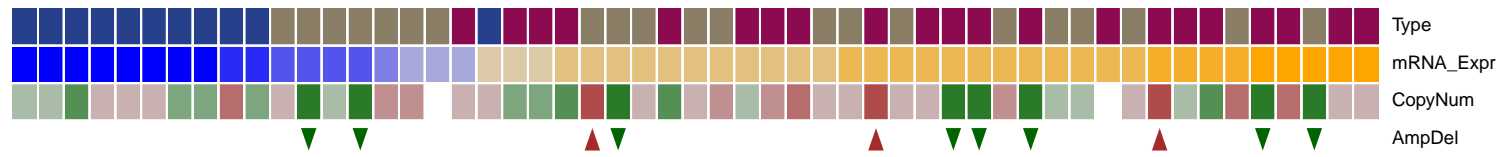

S2338  
S2356  
S2470  
S2125  
S2688  
S2770A  
S2261  
S2686  
S2731  
S2583  
S2495  
S2380  
S2645  
S2654  
S2365  
S2650  
S2350  
S2357  
S2405  
S2320  
S2668  
S2718  
S2410  
S2153  
S2423  
S2374  
S2247  
S2812  
S2216  
S2521  
S2189  
S2381  
S2549  
S2761  
S2097  
S2400  
S2408  
S2510  
S2392  
S2406  
S2800  
S2596  
S2667  
S2333  
S2330  
S2279  
S2508  
S2767  
S2379  
S2765  
S2734  
S2373  
S2391

# SOX10

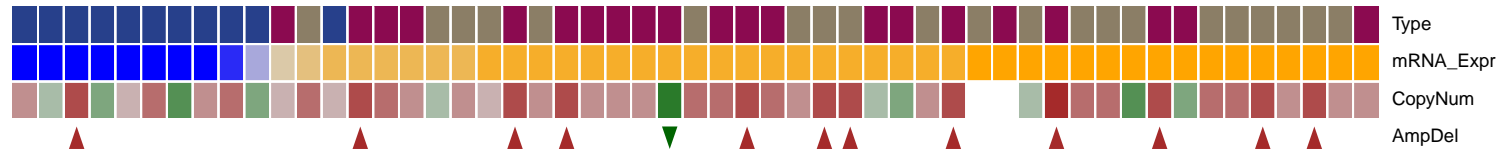

22:38382245  
22:38381626  
22:38381518  
22:38380983  
22:38380487  
22:38380439  
22:38379749  
22:38379506  
22:38379218  
22:38377633  
22:38368323

GeneLoc  
PromoterAssoc  
CpGIsland

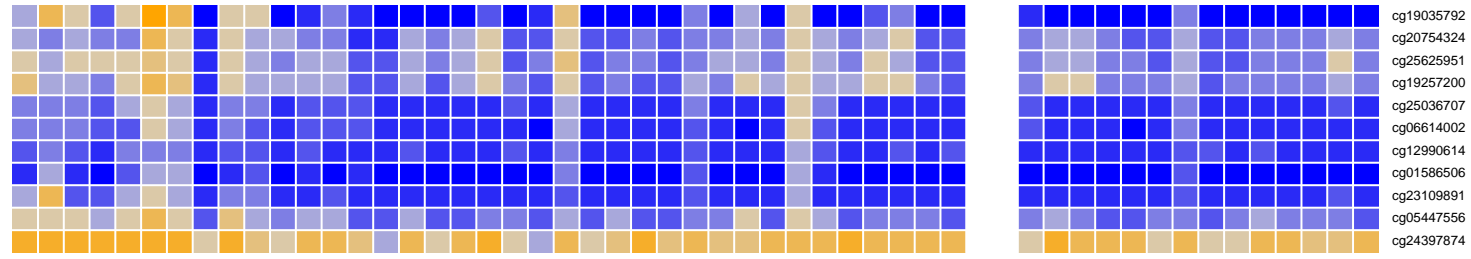

cg19035792  
cg20754324  
cg25625951  
cg19257200  
cg25036707  
cg06614002  
cg12990614  
cg01586506  
cg23109891  
cg05447556  
cg24397874

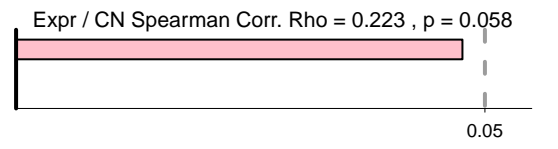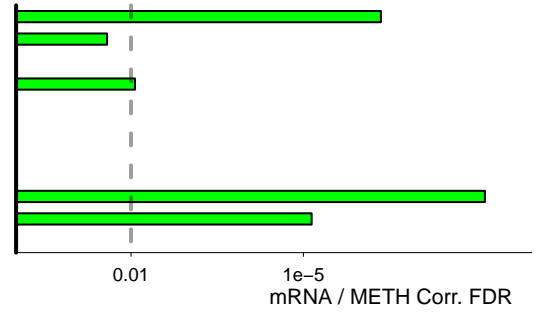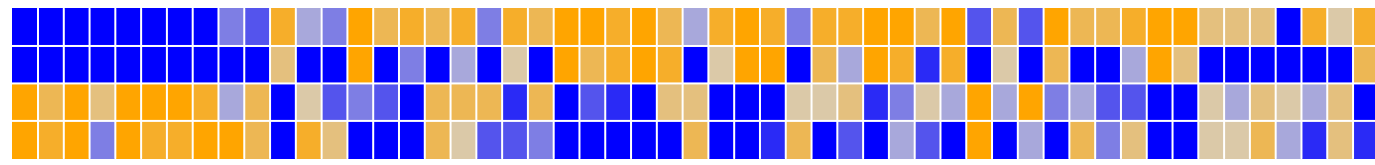

MITF  
TRPM1  
ZEB1  
AXL

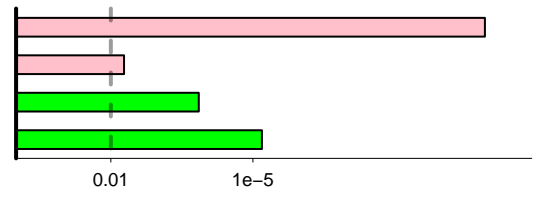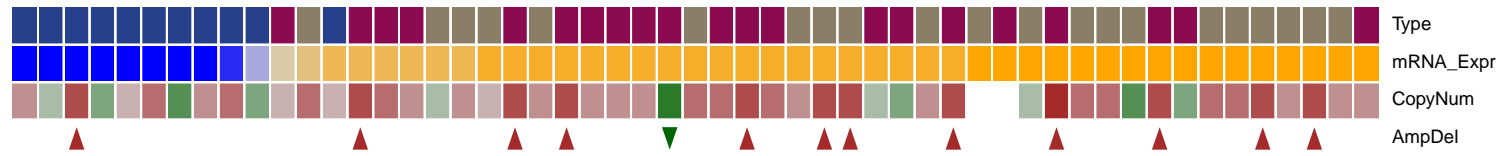

S2770A  
S2338  
S2125  
S2686  
S2356  
S2470  
S2261  
S2688  
S2731  
S2583  
S2357  
S2800  
S2405  
S2765  
S2761  
S2373  
S2423  
S2381  
S2645  
S2668  
S2380  
S2391  
S2406  
S2510  
S2374  
S2379  
S2650  
S2189  
S2408  
S2330  
S2654  
S2596  
S2247  
S2521  
S2320  
S2333  
S2216  
S2350  
S2667  
S2495  
S2718  
S2410  
S2392  
S2097  
S2400  
S2279  
S2767  
S2812  
S2153  
S2549  
S2734  
S2365  
S2508

Type  
mRNA\_Expr  
CopyNum  
AmpDel

Gene / Regulator Corr. P

# FAM69B

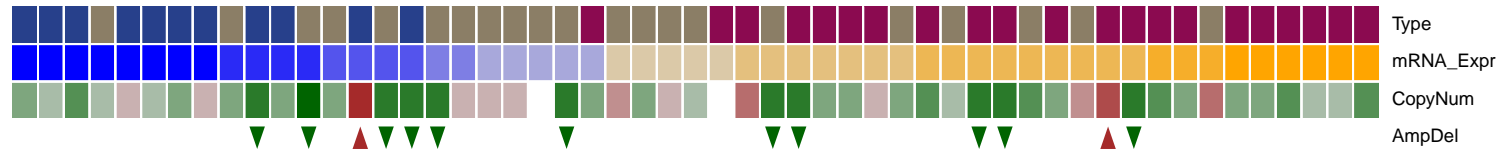

9: 139606200  
 9: 139606202  
 9: 139606583  
 9: 139607421  
 9: 139607602  
 9: 139608277  
 9: 139611158  
 9: 139615215  
 9: 139616233  
 9: 139616839  
 9: 139617442  
 9: 139617537  
 9: 139617752

GeneLoc  
 PromoterAssoc  
 CpGIsland

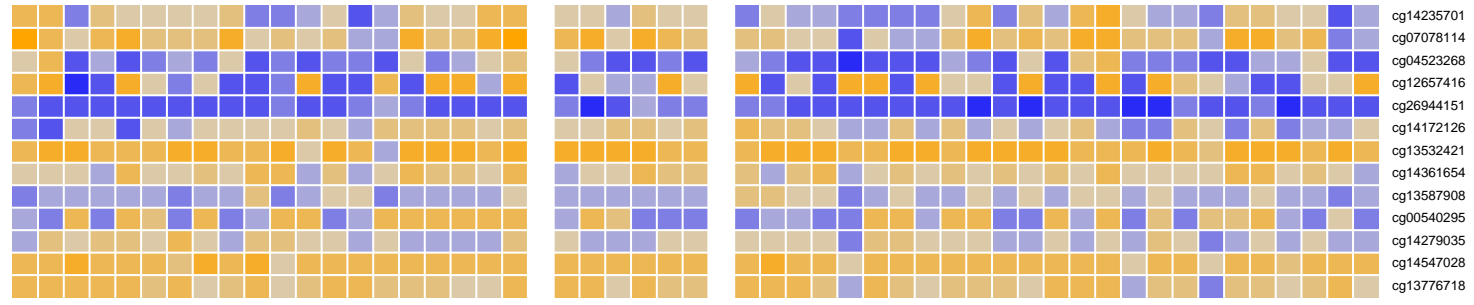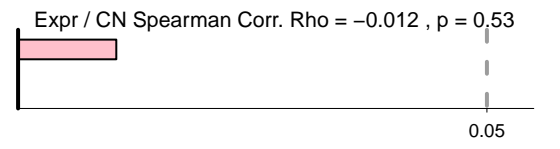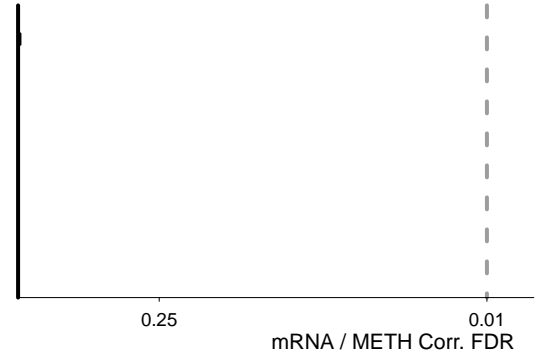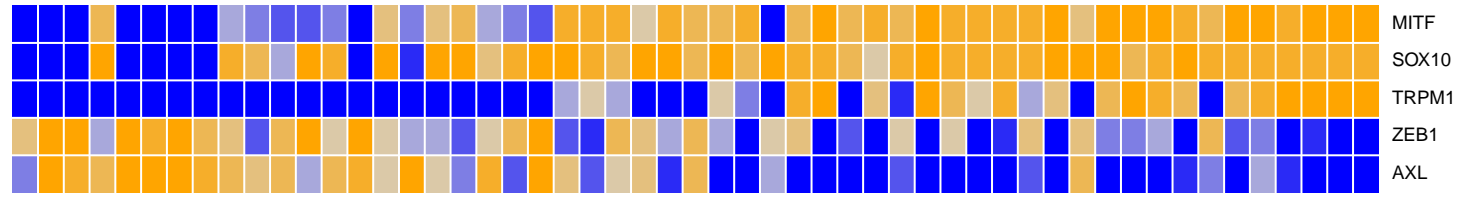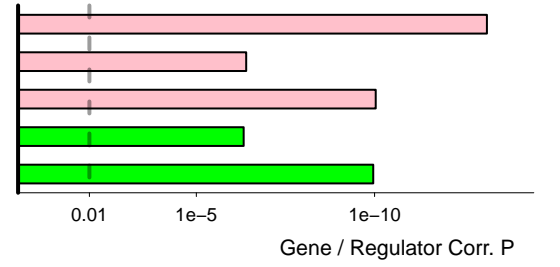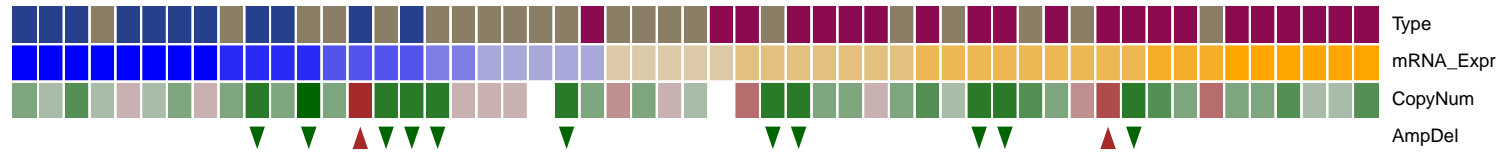

S2686  
 S2125  
 S2261  
 S2410  
 S2356  
 S2688  
 S2770A  
 S2338  
 S2650  
 S2405  
 S2583  
 S2495  
 S2654  
 S2470  
 S2767  
 S2731  
 S2812  
 S2392  
 S2800  
 S2645  
 S2350  
 S2097  
 S2668  
 S2381  
 S2365  
 S2734  
 S2423  
 S2667  
 S2373  
 S2549  
 S2379  
 S2391  
 S2761  
 S2357  
 S2333  
 S2400  
 S2596  
 S2189  
 S2510  
 S2247  
 S2279  
 S2153  
 S2718  
 S2765  
 S2216  
 S2508  
 S2380  
 S2406  
 S2320  
 S2330  
 S2521  
 S2408  
 S2374

# TBC1D16

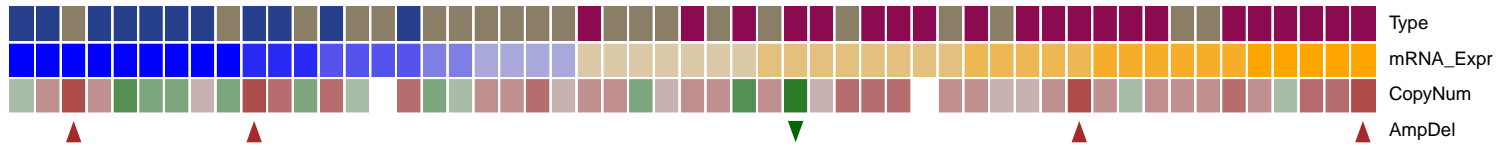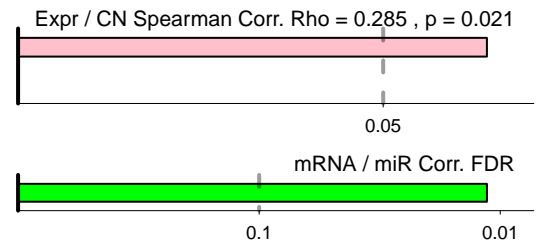

17: 78011083  
17: 78008520  
17: 78006238  
17: 78003528  
17: 77997997  
17: 77997950  
17: 77997633  
17: 77997760  
17: 77997453  
17: 77997482  
17: 77997302  
17: 77984086  
17: 77982987  
17: 77982906  
17: 77982477  
17: 77982400  
17: 77982340  
17: 77980966  
17: 77976625  
17: 77967529  
17: 77966262  
17: 77965982  
17: 77964070  
17: 77962682  
17: 77962240  
17: 77962098  
17: 77962048  
17: 77961719  
17: 77960689  
17: 77960371  
17: 77960007  
17: 77959826  
17: 77959804  
17: 77956872  
17: 77956840  
17: 77955530  
17: 77955167  
17: 77953437  
17: 77953088  
17: 77953016  
17: 77952488  
17: 77952463  
17: 77952453  
17: 77952290  
17: 77952247  
17: 77952109  
17: 77951858  
17: 77951707  
17: 77949135  
17: 77948865  
17: 77926436  
17: 77925938  
17: 77925317  
17: 77925136  
17: 77924733  
17: 77924665  
17: 77924582  
17: 77924371  
17: 77924275  
17: 77924269  
17: 77924180  
17: 77923971  
17: 77923675  
17: 77923603  
17: 77923314  
17: 77923275  
17: 77922972  
17: 77922865  
17: 77922775  
17: 77922738  
17: 77921489  
17: 77921375  
17: 77921265  
17: 77919684  
17: 77919434  
17: 77918650  
17: 77917772  
17: 77917595  
17: 77916892  
17: 77916768  
17: 77916733  
17: 77915957  
17: 77915948  
17: 77914869  
17: 77914742  
17: 77914162  
17: 77913966  
17: 77912021  
17: 77911850  
17: 77910840  
17: 77906735

GeneLoc  
PromoterAssoc  
CpGIsland

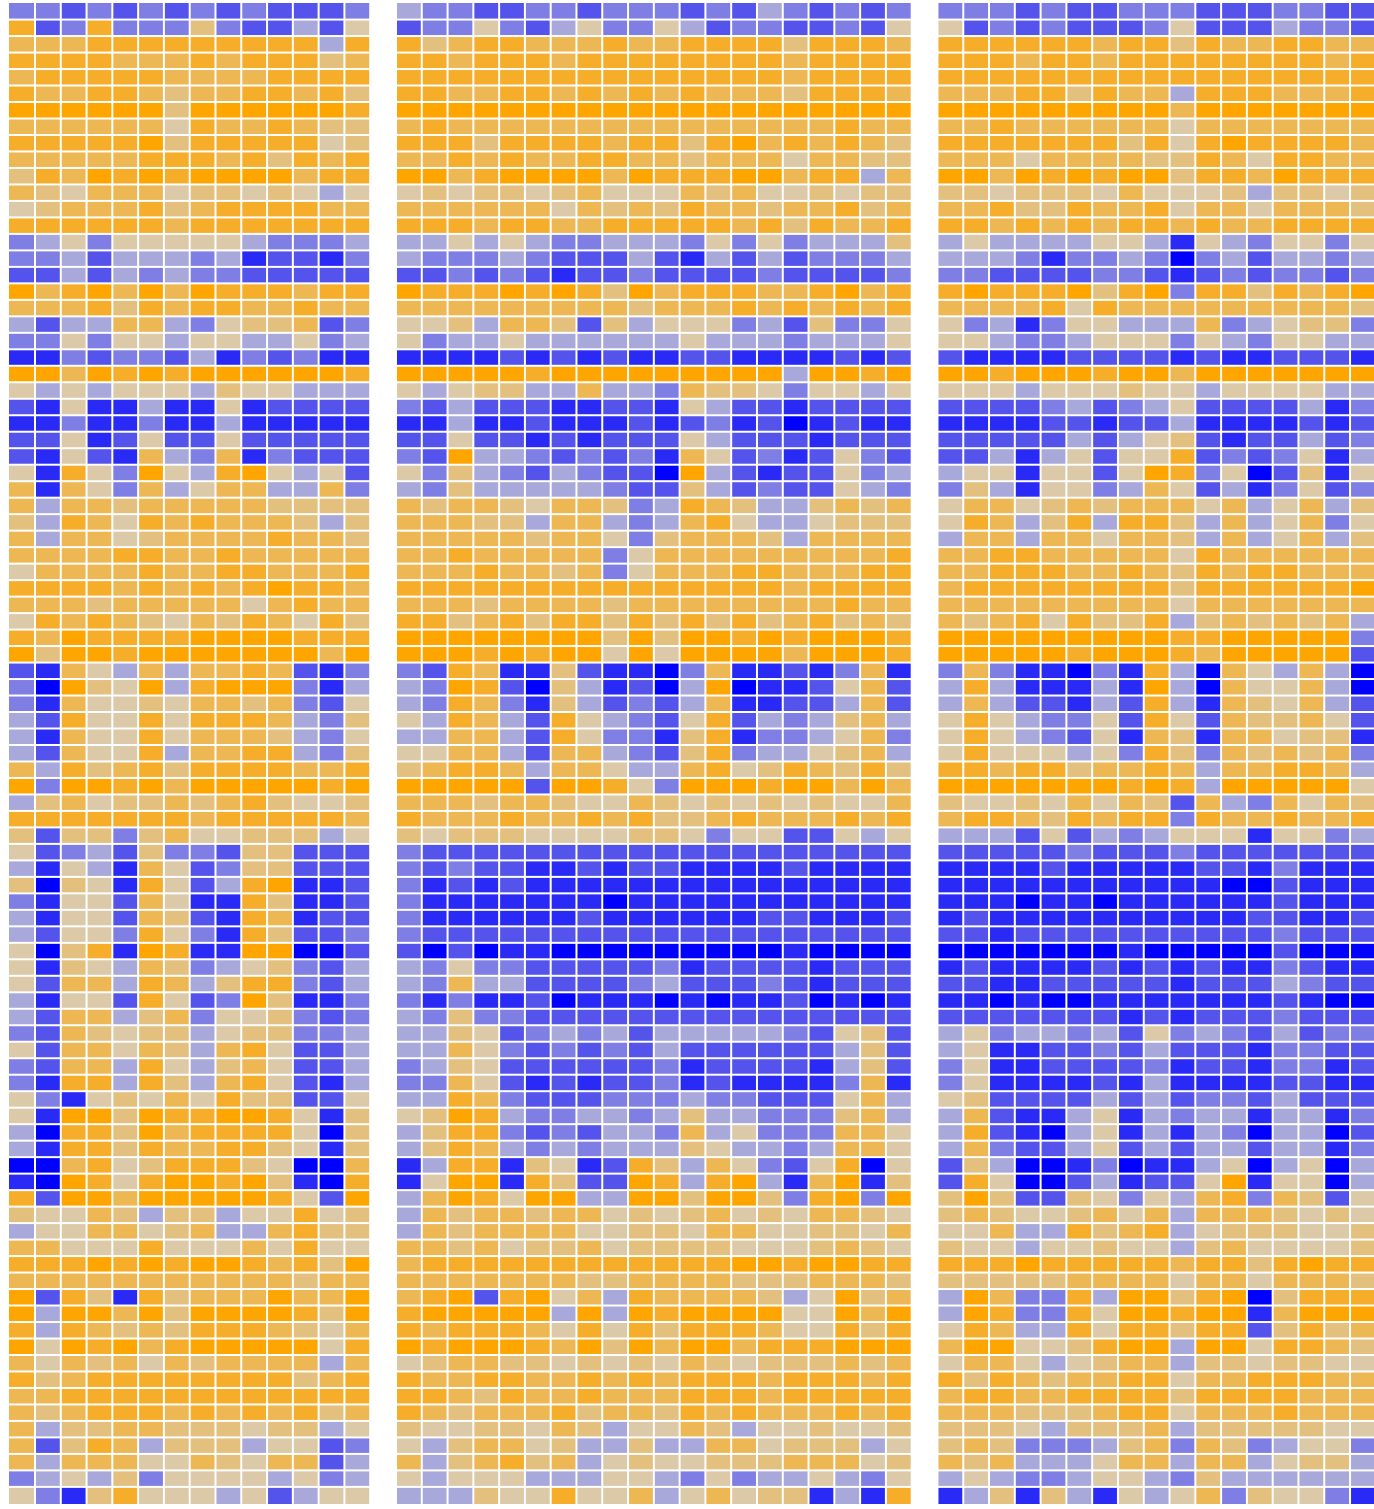

og04040925  
og20067780  
og11830876  
og02348119  
og21048763  
og04615639  
og2532627  
og24805759  
og0675820  
og26339821  
og08939344  
og01910125  
og06616122  
og19763755  
cg14497491  
cg08384146  
cg12766770  
og00961855  
og07204724  
cg03837680  
cg00914963  
cg20524128  
cg26379012  
cg25750004  
cg25278144  
cg20443278  
cg10188797  
cg27143703  
cg08731068  
cg11496593  
cg15377933  
cg21303745  
cg24904739  
og07661106  
og02446441  
og06790492  
og03908526  
cg12600201  
og04194055  
cg14193007  
cg23874373  
cg12314882  
cg18658151  
og07506081  
cg06856735  
cg01303141  
cg14787267  
cg03582371  
cg03092482  
cg03594801  
cg13466546  
cg12700039  
cg20097219  
cg19004465  
cg23651872  
cg17295878  
cg07618085  
cg18749563  
cg14505694  
cg01084215  
cg17367884  
cg03296204  
cg26287152  
og10496150  
og04791718  
cg21811911  
og00247094  
cg19140335  
cg17843418  
og14331206  
og08515811  
og02364970  
og09398080  
og00314984  
og27438832  
og06179971  
og23454517  
cg11283847  
cg26567001  
cg20667480  
cg00256231  
cg15710638  
cg15547344  
og04618903  
og08823837  
og04157865  
cg17854297  
og18430044  
og03841638  
og16897462  
og19791271

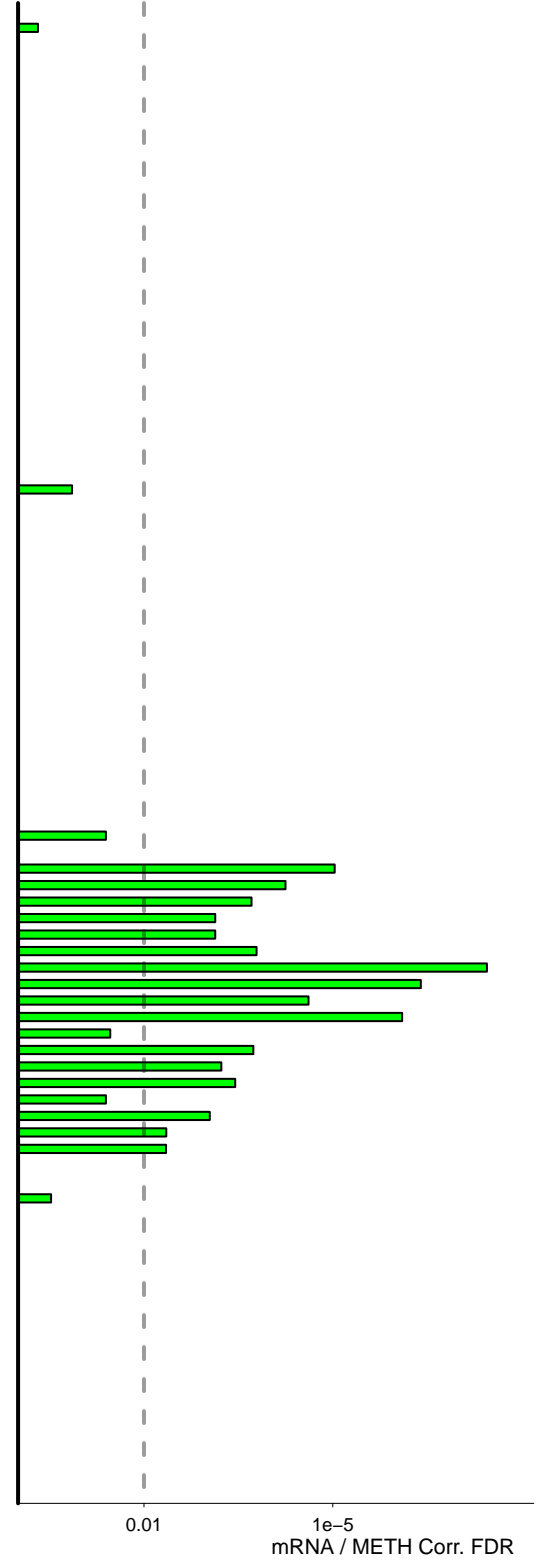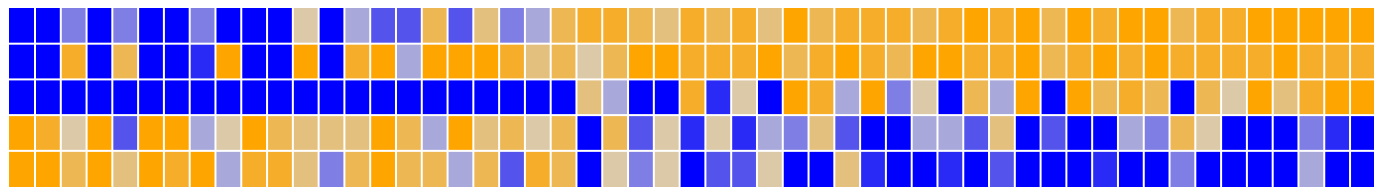

MITF  
SOX10  
TRPM1  
ZEB1  
AXL

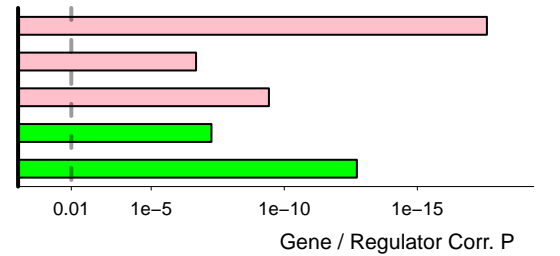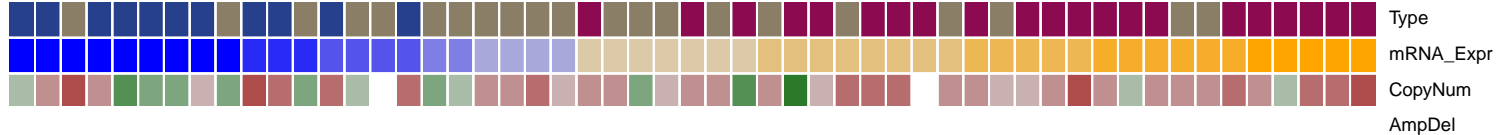

S2356  
S2688  
S2654  
S2125  
S2405  
S2770A  
S2261  
S2731  
S2549  
S2470  
S2338  
S2365  
S2686  
S2650  
S2350  
S2583  
S2410  
S2495  
S2153  
S2645  
S2800  
S2423  
S2357  
S2381  
S2392  
S2767  
S2510  
S2333  
S2668  
S2812  
S2765  
S2379  
S2097  
S2330  
S2373  
S2667  
S2734  
S2406  
S2247  
S2400  
S2761  
S2408  
S2508  
S2216  
S2718  
S2380  
S2596  
S2189  
S2374  
S2279  
S2320  
S2521  
S2391

Type  
mRNA\_Expr  
CopyNum  
AmpDel

# RENBP

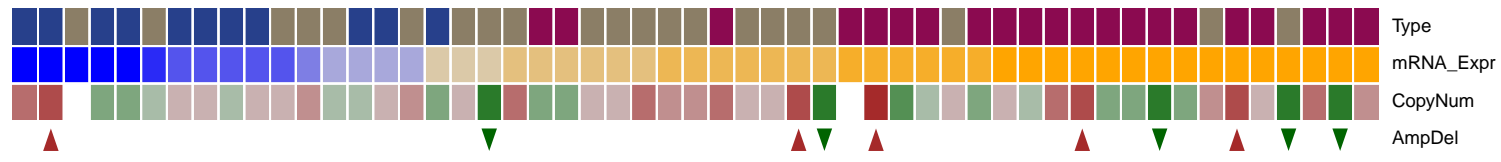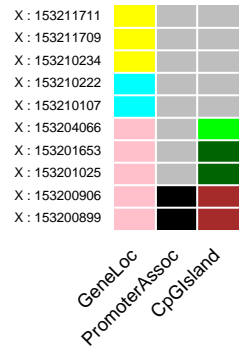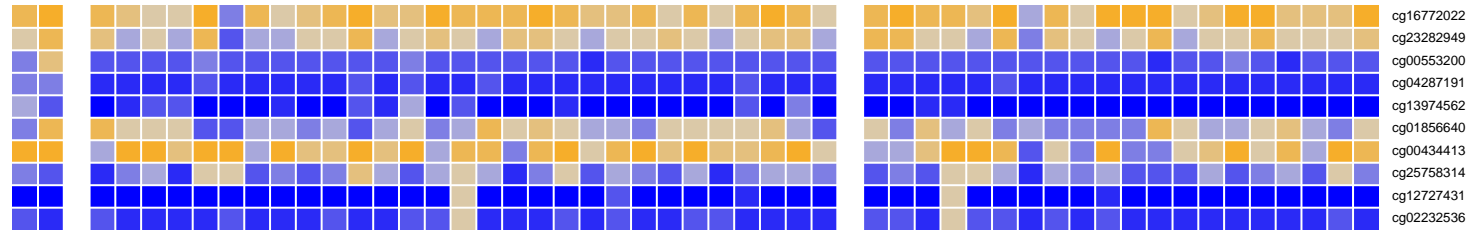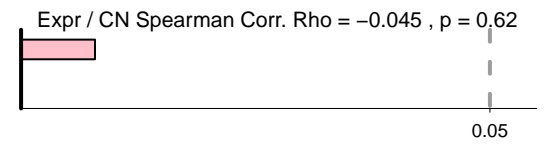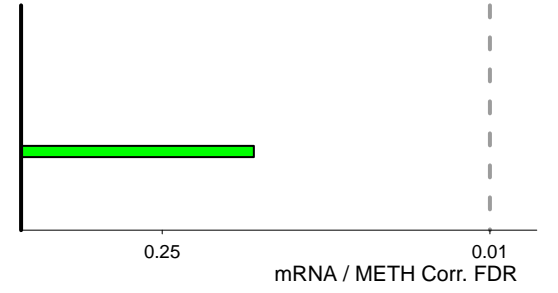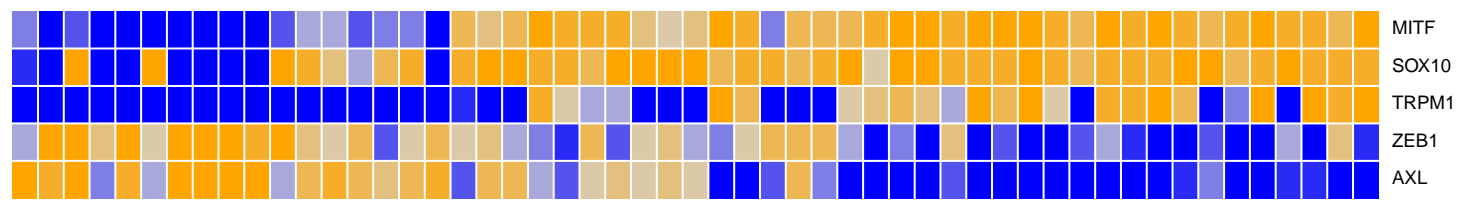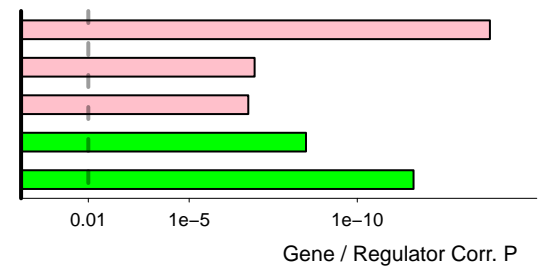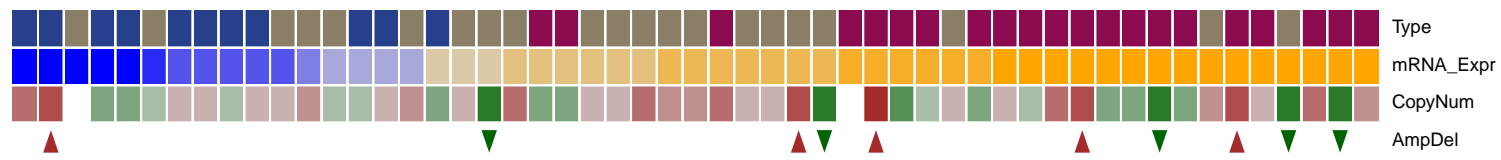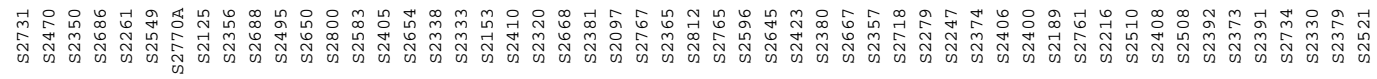

# NR4A1

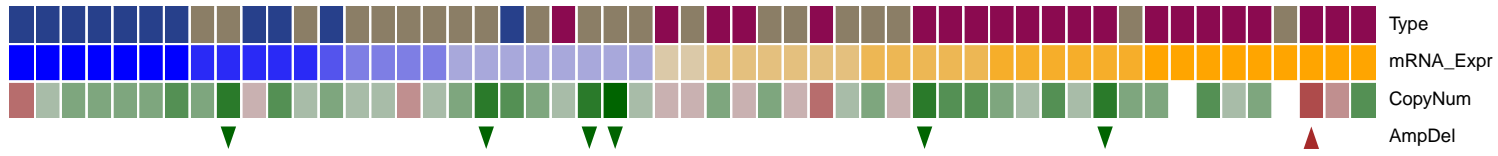

12 : 52414843  
 12 : 52416858  
 12 : 52417019  
 12 : 52423671  
 12 : 52426669  
 12 : 52426797  
 12 : 52426922  
 12 : 52427143  
 12 : 52427204  
 12 : 52430400  
 12 : 52430520  
 12 : 52432565  
 12 : 52435420  
 12 : 52436085  
 12 : 52437299  
 12 : 52437342  
 12 : 52437360  
 12 : 52437451  
 12 : 52437571  
 12 : 52444554  
 12 : 52444825  
 12 : 52444993  
 12 : 52445075  
 12 : 52445276  
 12 : 52445820  
 12 : 52448244  
 12 : 52448859  
 12 : 52448908  
 12 : 52450193  
 12 : 52450213  
 12 : 52451268  
 12 : 52452745

GeneLoc  
 PromoterAssoc  
 CpGIsland

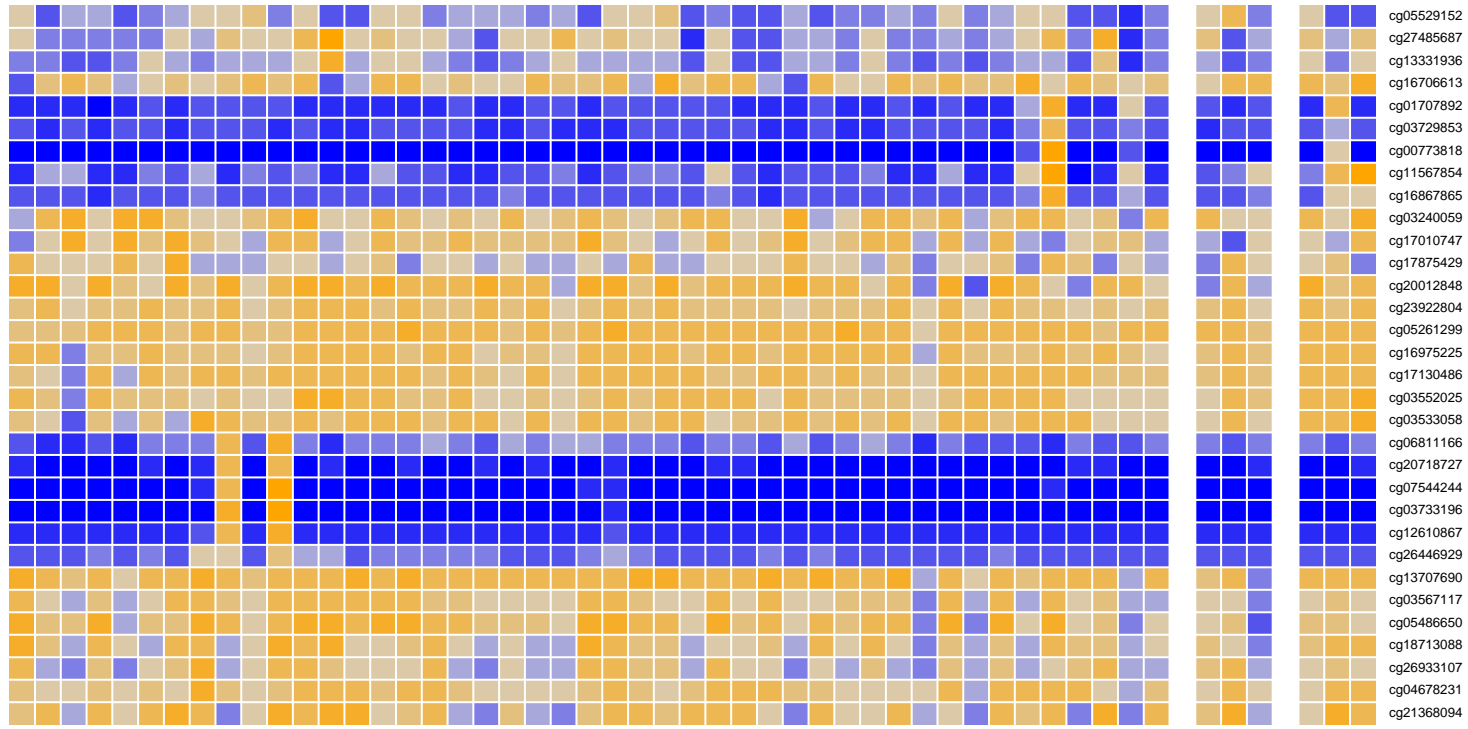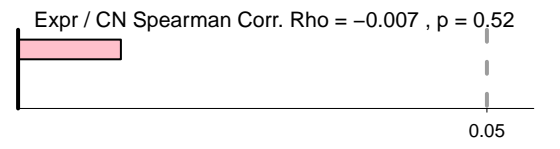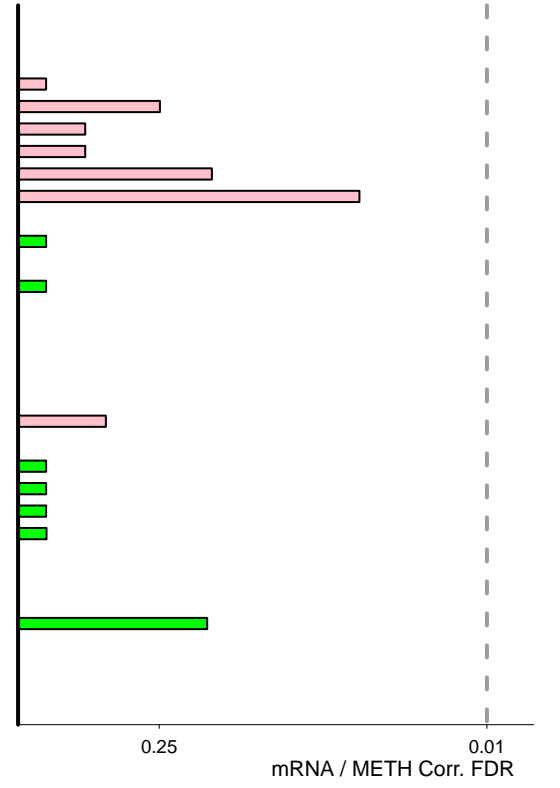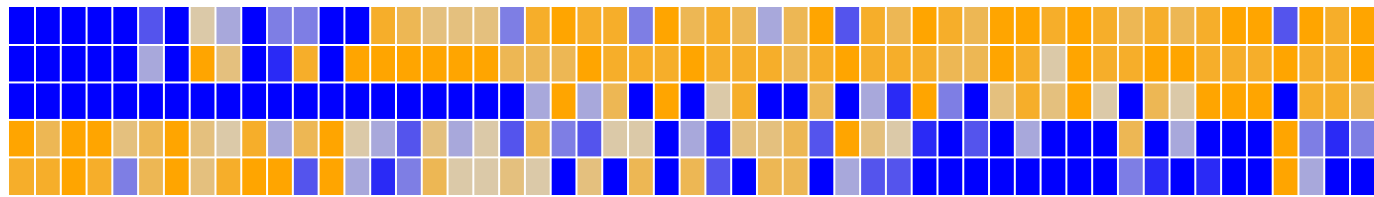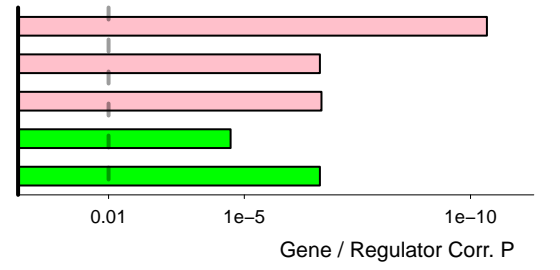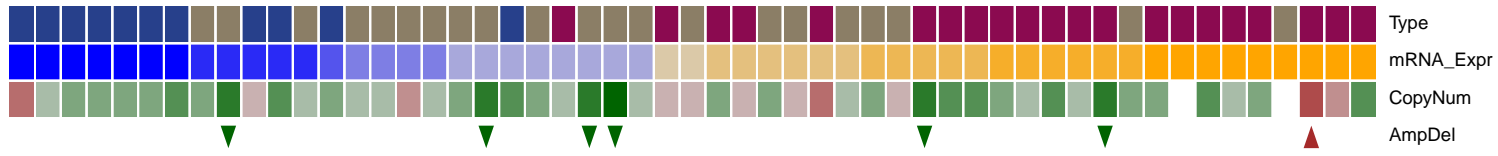

S2470  
 S2338  
 S2356  
 S2261  
 S2686  
 S2583  
 S2770A  
 S2365  
 S2800  
 S2688  
 S2731  
 S2645  
 S2125  
 S2549  
 S2734  
 S2392  
 S2153  
 S2812  
 S2767  
 S2405  
 S2381  
 S2765  
 S2097  
 S2596  
 S2654  
 S2391  
 S2410  
 S2668  
 S2379  
 S2650  
 S2423  
 S2406  
 S2495  
 S2247  
 S2333  
 S2521  
 S2373  
 S2761  
 S2279  
 S2216  
 S2357  
 S2400  
 S2189  
 S2380  
 S2508  
 S2667  
 S2330  
 S2408  
 S2374  
 S2350  
 S2320  
 S2510  
 S2718

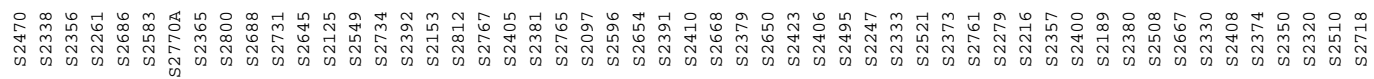

Type  
 mRNA\_Expr  
 CopyNum  
 AmpDel



# IGSF11

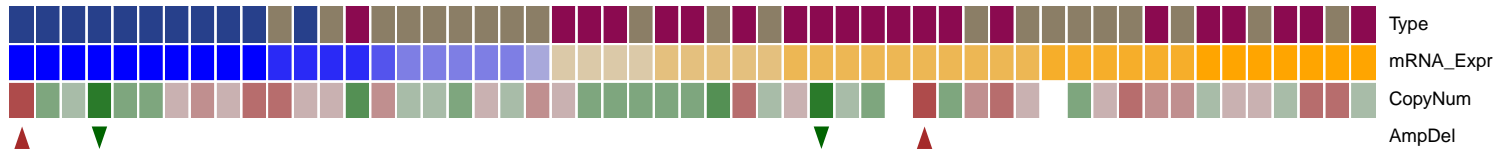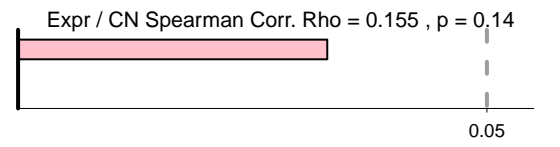

3:118865478  
3:118865365  
3:118865255  
3:118865050  
3:118865028  
3:118865026  
3:118864974  
3:118864966  
3:118864952  
3:118864895  
3:118864870  
3:118864836  
3:118864825  
3:118864763  
3:118864629  
3:118864587  
3:118792317  
3:118757898  
3:118754376  
3:118754097  
3:118753093  
3:118753005  
3:118750463  
3:118734756  
3:118706648  
3:118705126  
3:118676357  
3:118663697  
3:118663642  
3:118663534  
3:118663470  
3:118627022  
3:118620082

GeneLoc  
PromoterAssoc  
CpGIsland

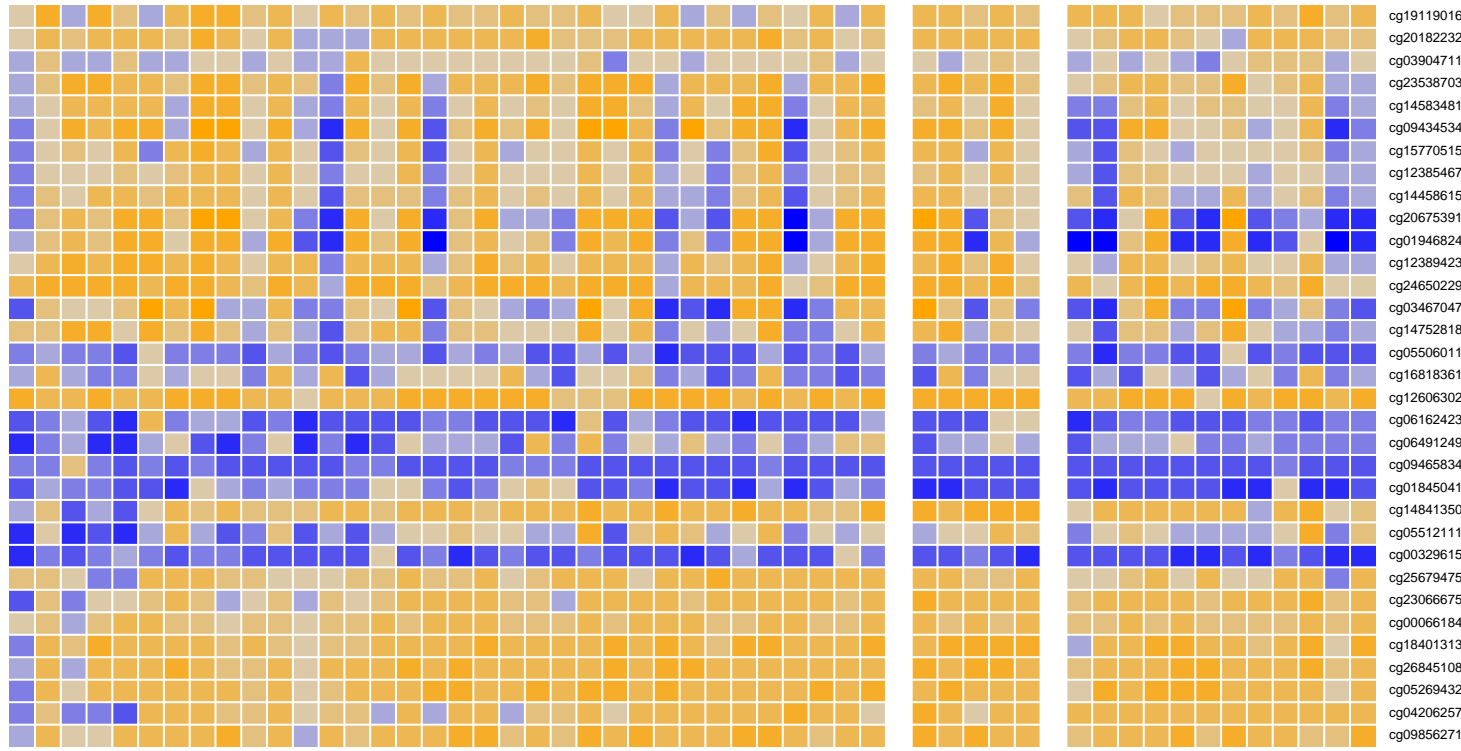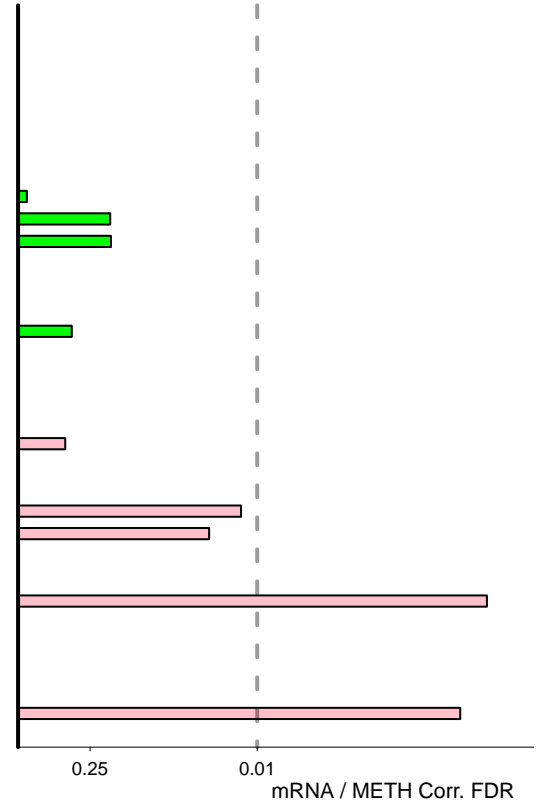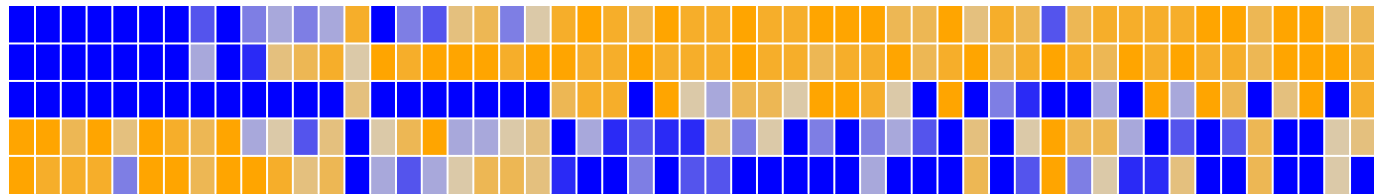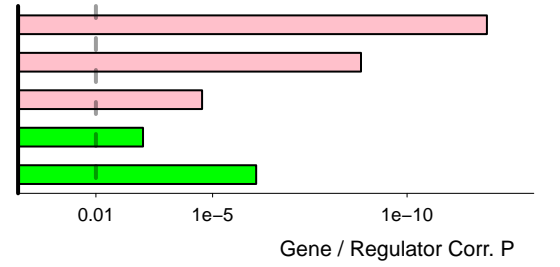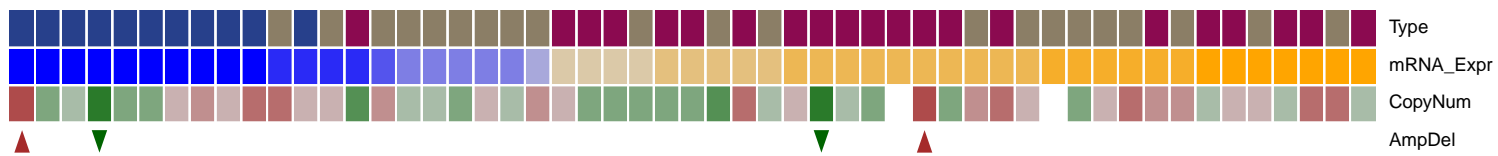

S2770A  
S2261  
S2338  
S2470  
S2686  
S2356  
S2688  
S2583  
S2125  
S2731  
S2800  
S2405  
S2650  
S2357  
S2549  
S2645  
S2495  
S2812  
S2410  
S2654  
S2365  
S2508  
S2216  
S2510  
S2392  
S2521  
S2668  
S2247  
S2718  
S2596  
S2189  
S2765  
S2408  
S2320  
S2667  
S2761  
S2391  
S2153  
S2373  
S2333  
S2350  
S2380  
S2381  
S2734  
S2330  
S2097  
S2374  
S2406  
S2423  
S2279  
S2400  
S2767  
S2379

# EDNRB

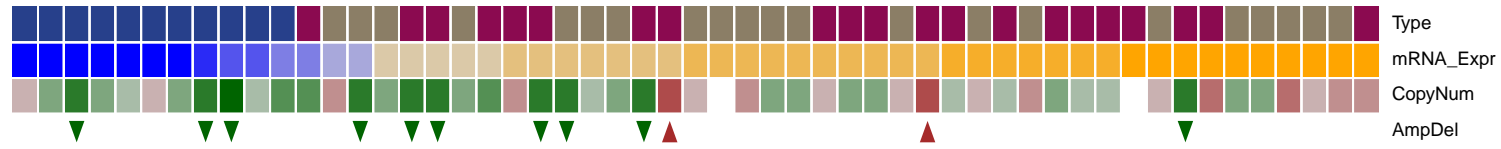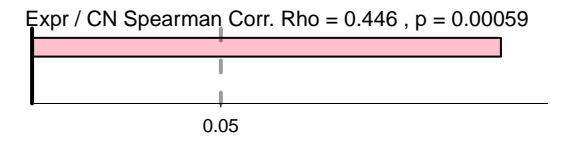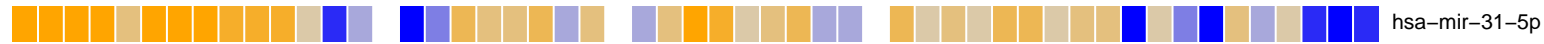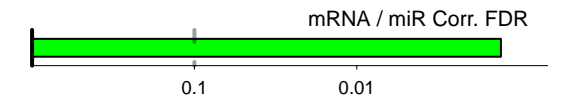

13 : 78494462  
 13 : 78494442  
 13 : 78494330  
 13 : 78494272  
 13 : 78494171  
 13 : 78494067  
 13 : 78494064  
 13 : 78493920  
 13 : 78493349  
 13 : 78493297  
 13 : 78493205  
 13 : 78493100  
 13 : 78493066  
 13 : 78492730  
 13 : 78492678  
 13 : 78492568  
 13 : 78492306  
 13 : 78492216  
 13 : 78491982  
 13 : 78491199  
 13 : 78470850  
 13 : 78470739

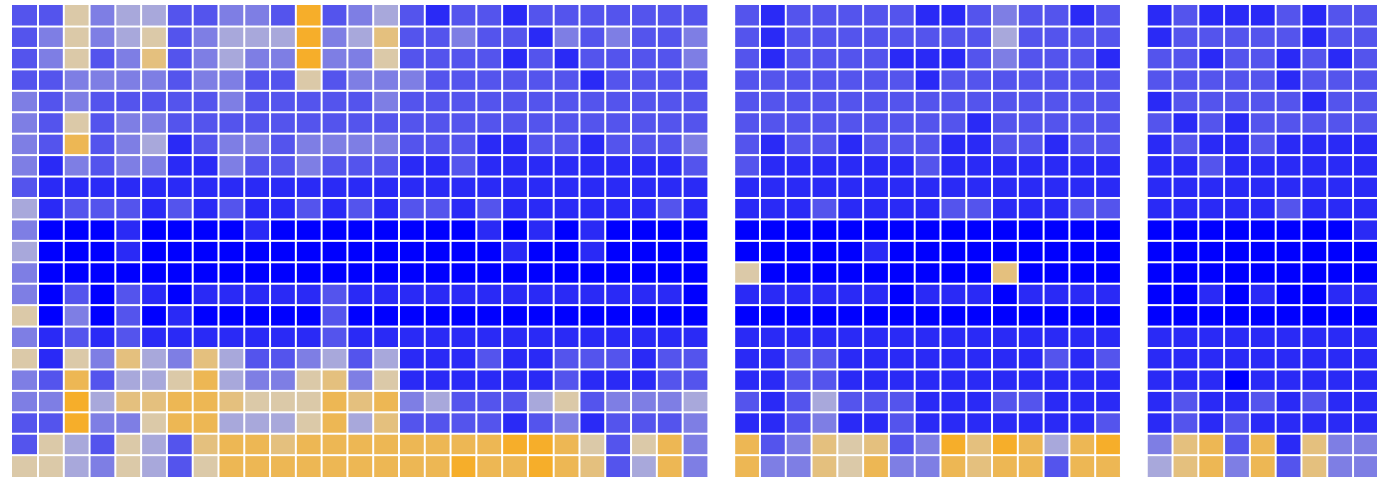

cg24942919  
 cg11074192  
 cg08634041  
 cg10764762  
 cg19111971  
 cg19759502  
 cg07974719  
 cg12983394  
 cg12847373  
 cg19650157  
 cg23766591  
 cg04390523  
 cg06971129  
 cg26622320  
 cg15699226  
 cg03086857  
 cg12120741  
 cg07495027  
 cg24785726  
 cg2326536  
 cg13866767  
 cg18210860

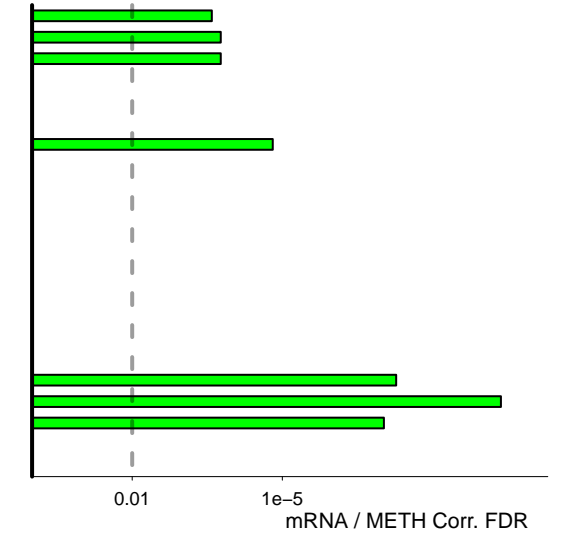

GeneLoc  
 PromoterAssoc  
 CpGIsland

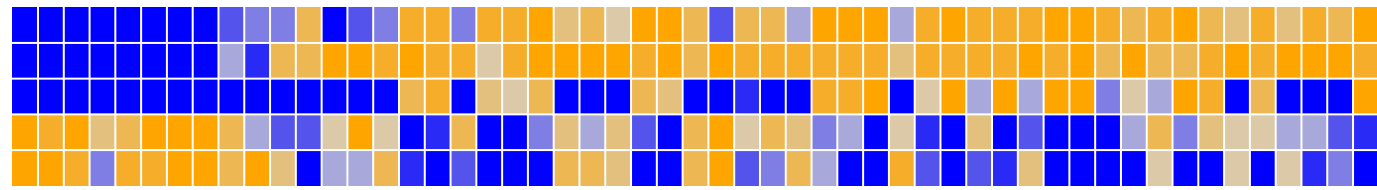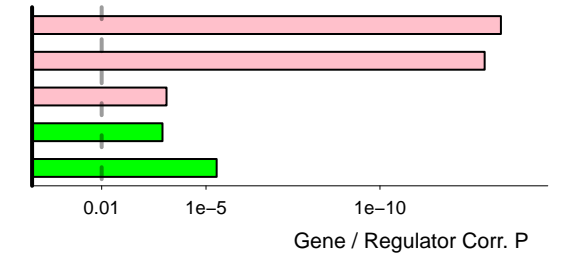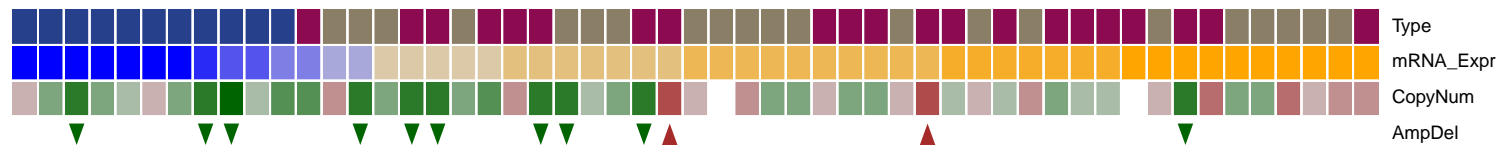

S2770A  
 S2688  
 S2470  
 S2686  
 S2338  
 S2261  
 S2356  
 S2125  
 S2583  
 S2731  
 S2405  
 S2761  
 S2549  
 S2495  
 S2654  
 S2508  
 S2510  
 S2645  
 S2357  
 S2189  
 S2718  
 S2153  
 S2410  
 S2365  
 S2406  
 S2279  
 S2423  
 S2350  
 S2333  
 S2380  
 S2650  
 S2320  
 S2216  
 S2391  
 S2800  
 S2668  
 S2374  
 S2247  
 S2330  
 S2097  
 S2408  
 S2400  
 S2373  
 S2667  
 S2381  
 S2765  
 S2379  
 S2767  
 S2596  
 S2812  
 S2734  
 S2392  
 S2521

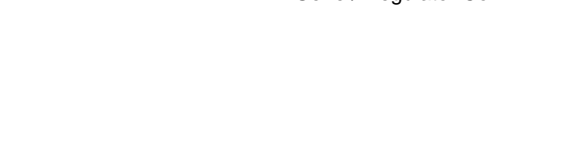

# GYG2

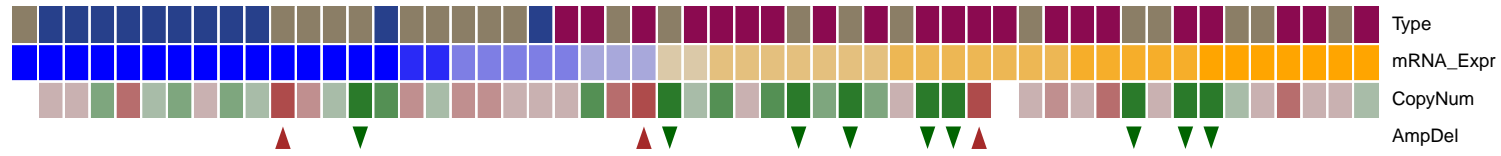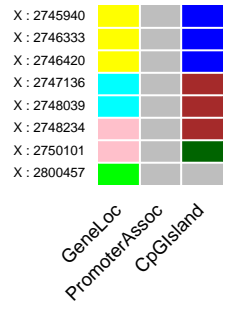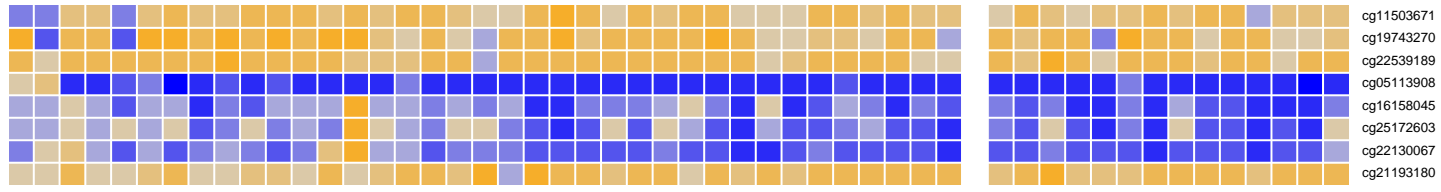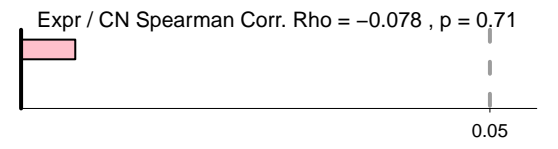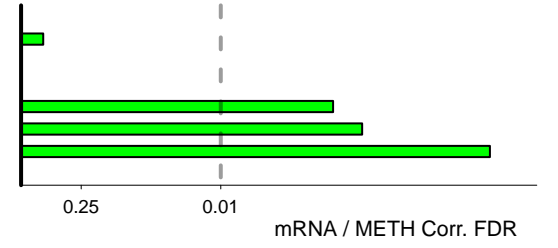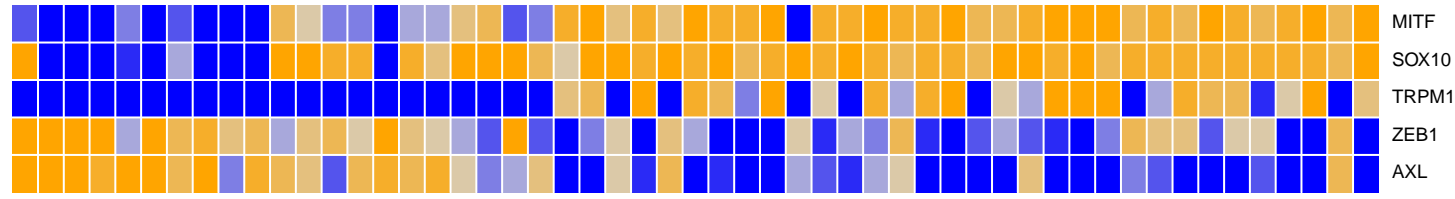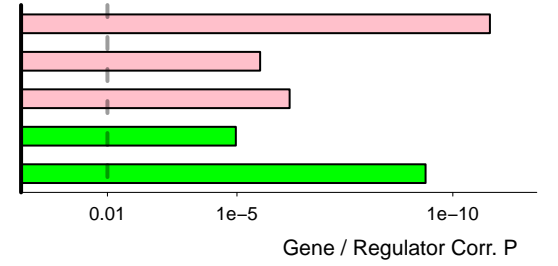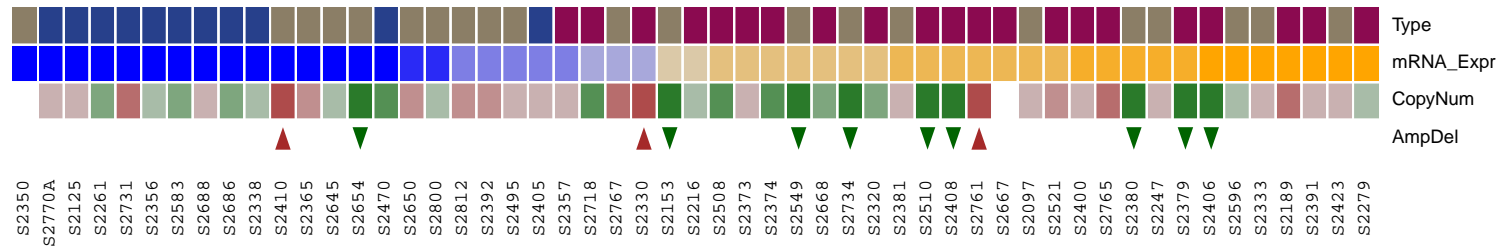

# CAPN3

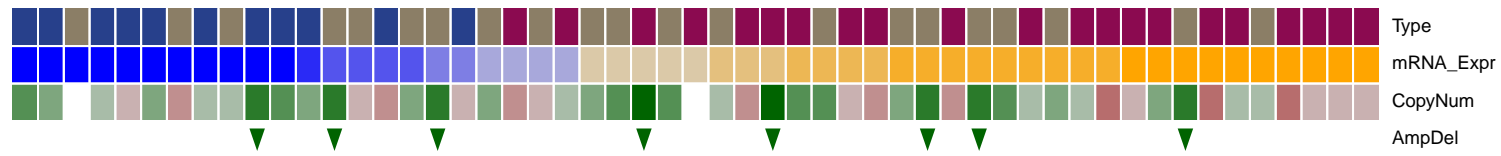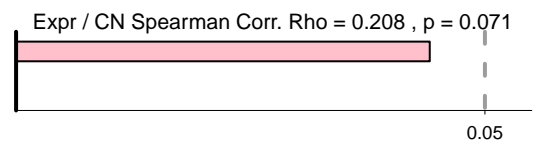

15 : 42639458  
 15 : 42640316  
 15 : 42651086  
 15 : 42652294  
 15 : 42677958  
 15 : 42693448  
 15 : 42693555  
 15 : 42694403  
 15 : 42694406  
 15 : 42694733  
 15 : 42695749  
 15 : 42695858  
 15 : 42696348  
 15 : 42697094

GeneLoc  
 PromoterAssoc  
 CpGIsland

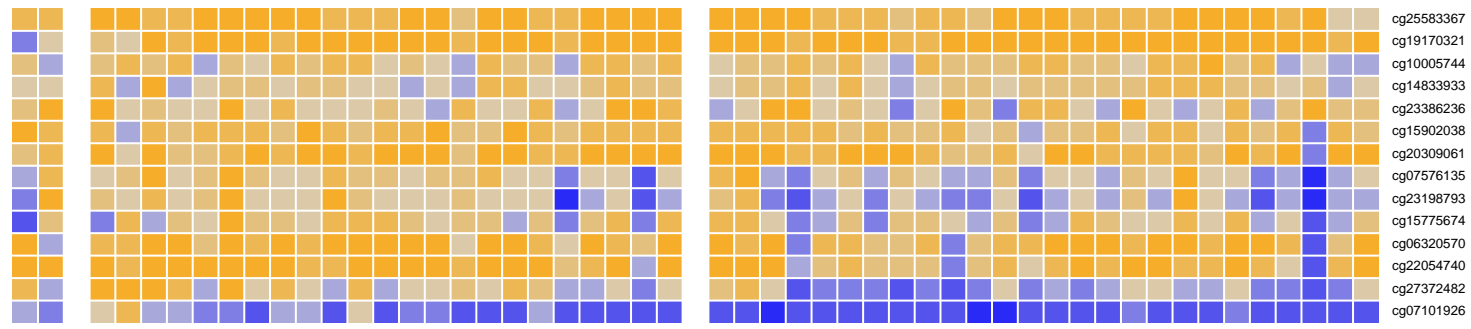

cg25583367  
 cg19170321  
 cg10005744  
 cg14833933  
 cg23386236  
 cg15902038  
 cg20309061  
 cg07576135  
 cg23198793  
 cg15775674  
 cg06320570  
 cg22054740  
 cg27372482  
 cg07101926

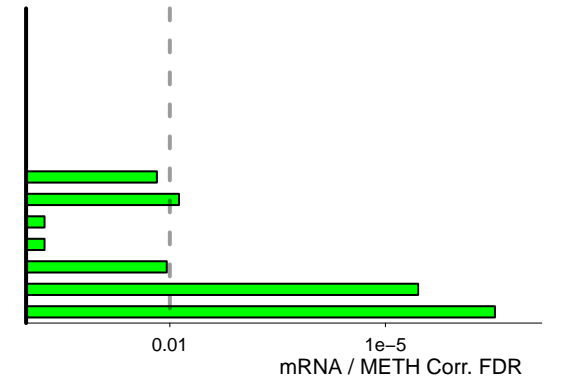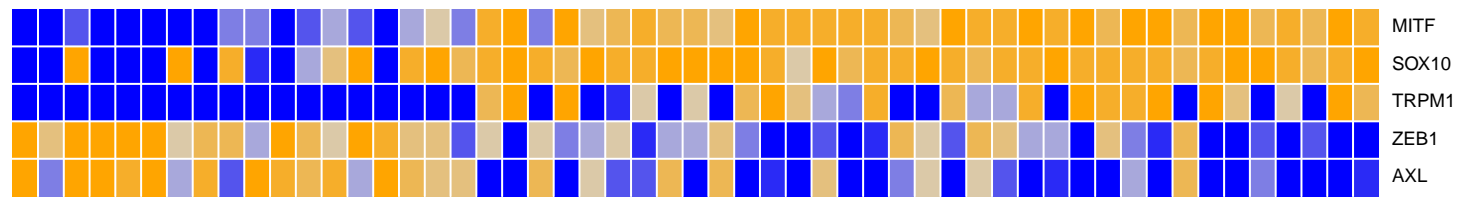

MITF  
 SOX10  
 TRPM1  
 ZEB1  
 AXL

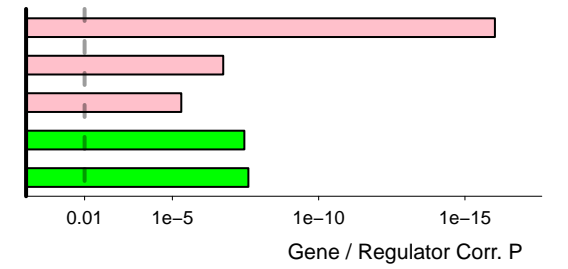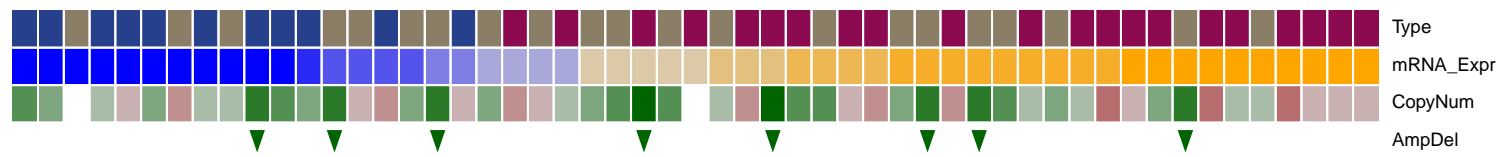

S2770A  
 S2686  
 S2350  
 S2356  
 S2470  
 S2125  
 S2549  
 S2338  
 S2645  
 S2731  
 S2261  
 S2583  
 S2800  
 S2495  
 S2688  
 S2650  
 S2365  
 S2405  
 S2596  
 S2400  
 S2654  
 S2765  
 S2812  
 S2333  
 S2668  
 S2410  
 S2667  
 S2153  
 S2718  
 S2330  
 S2357  
 S2097  
 S2373  
 S2510  
 S2380  
 S2767  
 S2406  
 S2381  
 S2247  
 S2216  
 S2734  
 S2408  
 S2379  
 S2320  
 S2521  
 S2423  
 S2391  
 S2279  
 S2392  
 S2189  
 S2761  
 S2374  
 S2508

# BEST1

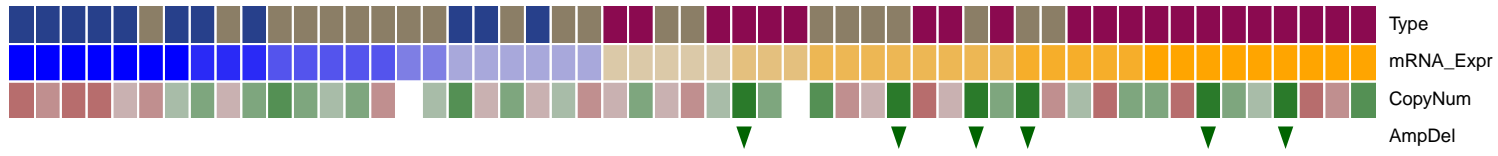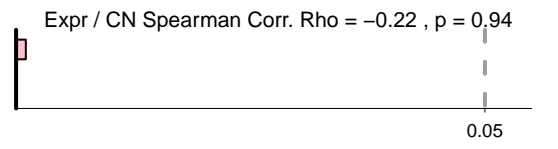

11 : 61716821  
 11 : 61716830  
 11 : 61717005  
 11 : 61717191  
 11 : 61717225  
 11 : 61717334  
 11 : 61717684  
 11 : 61717766  
 11 : 61717780  
 11 : 61718972  
 11 : 61722666  
 11 : 61722937  
 11 : 61723124  
 11 : 61723377  
 11 : 61724438  
 11 : 61728829  
 11 : 61730880  
 11 : 61731930  
 11 : 61732658

GeneLoc  
 PromoterAssoc  
 CpGIsland

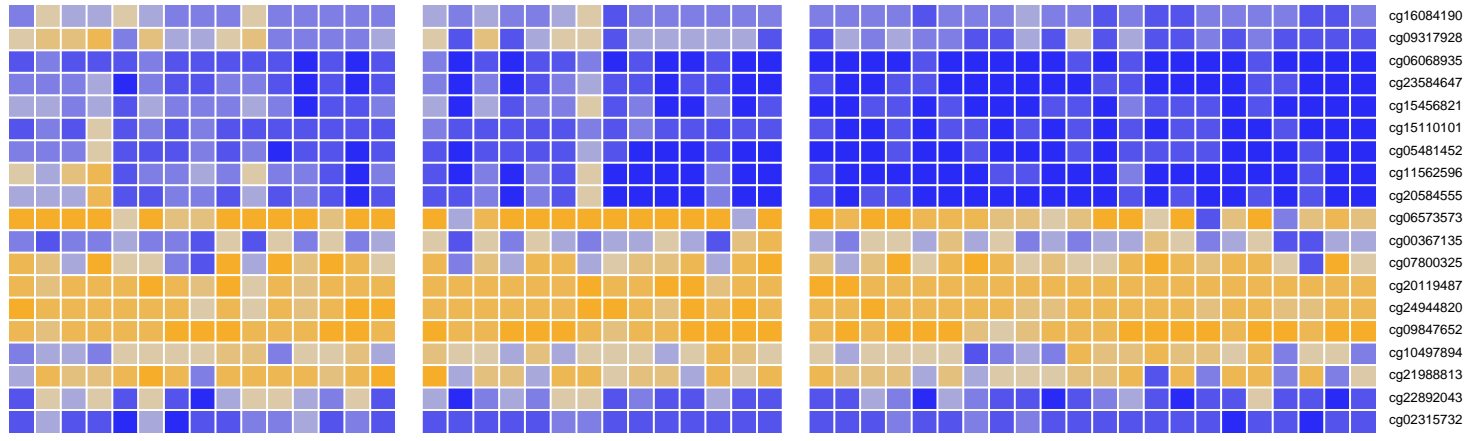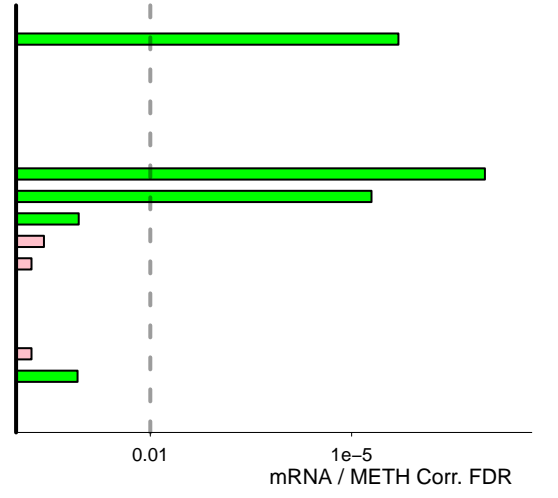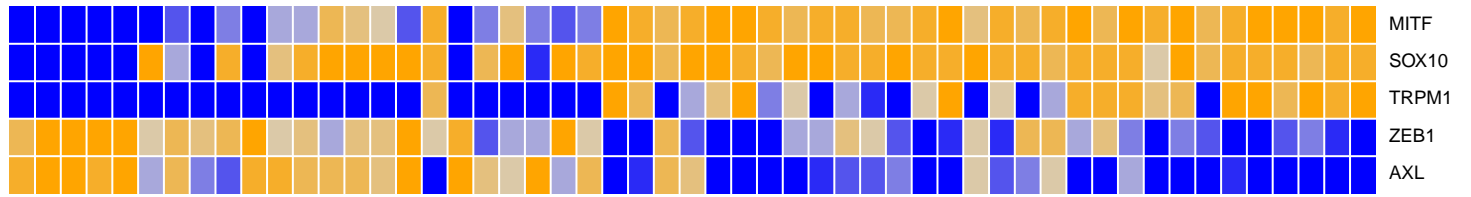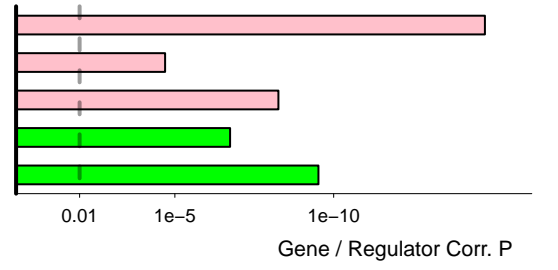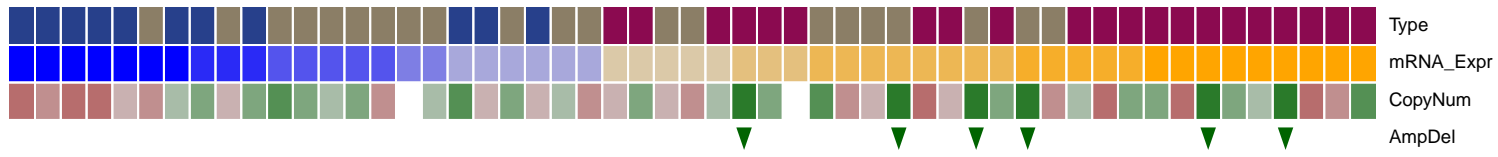

S2338  
 S2770A  
 S2125  
 S2470  
 S2356  
 S2549  
 S2583  
 S2686  
 S2645  
 S2261  
 S2800  
 S2650  
 S2410  
 S2153  
 S2365  
 S2350  
 S2596  
 S2688  
 S2405  
 S2812  
 S2731  
 S2495  
 S2654  
 S2400  
 S2508  
 S2423  
 S2097  
 S2279  
 S2391  
 S2373  
 S2667  
 S2734  
 S2247  
 S2333  
 S2392  
 S2189  
 S2521  
 S2767  
 S2668  
 S2380  
 S2381  
 S2216  
 S2379  
 S2320  
 S2357  
 S2718  
 S2761  
 S2330  
 S2408  
 S2406  
 S2765  
 S2510  
 S2374

Type  
 mRNA\_Expr  
 CopyNum  
 AmpDel

# IRF4

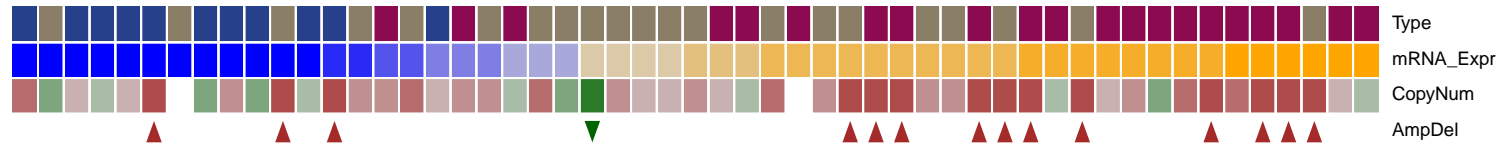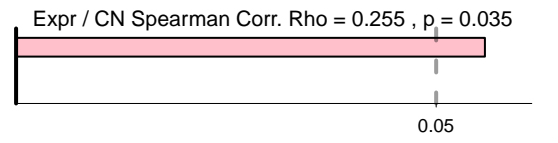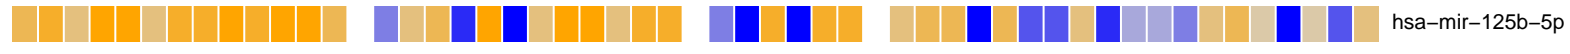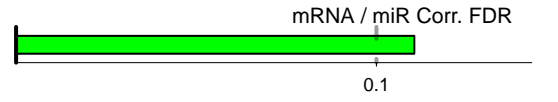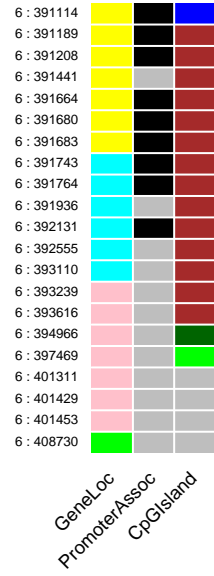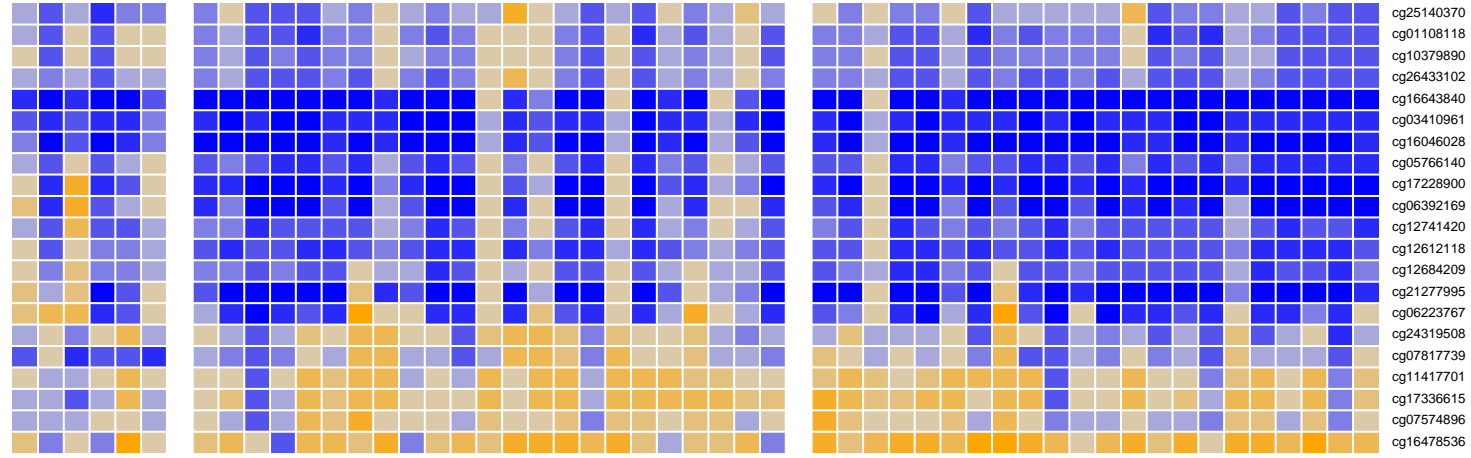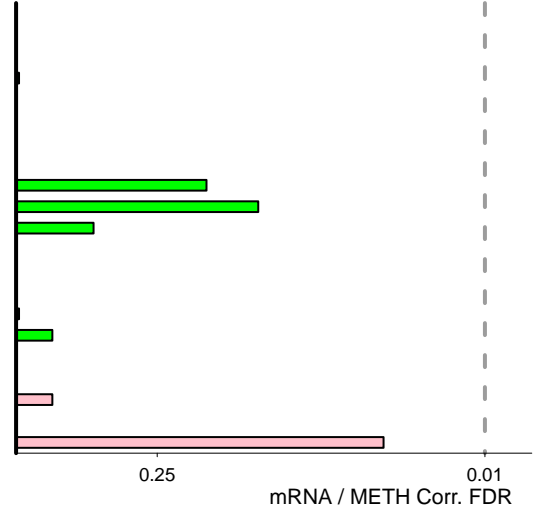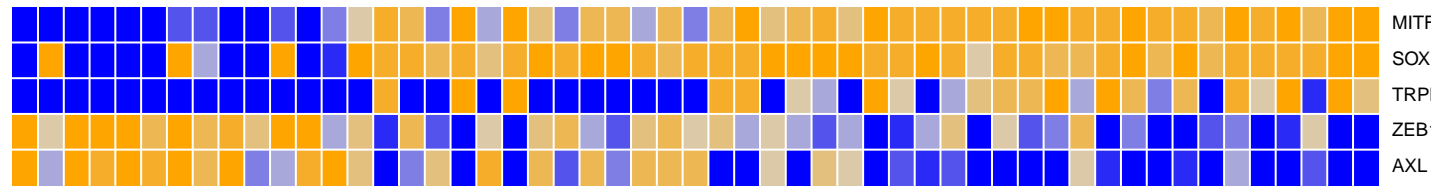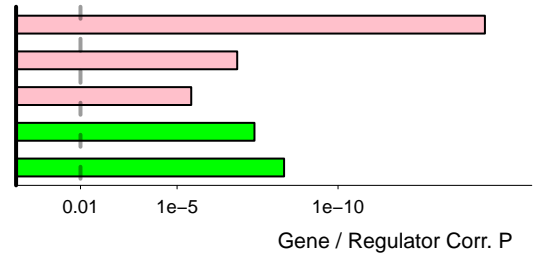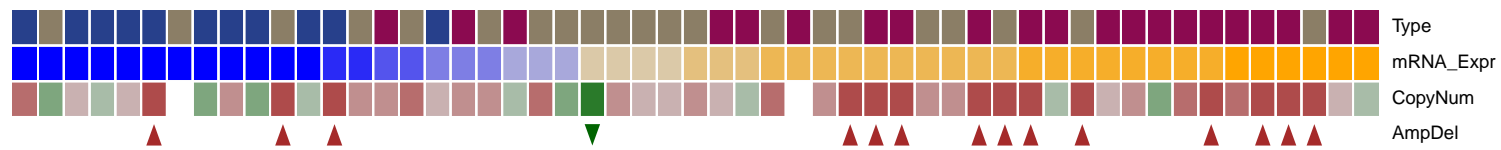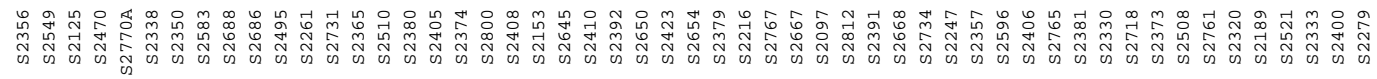

# OCA2

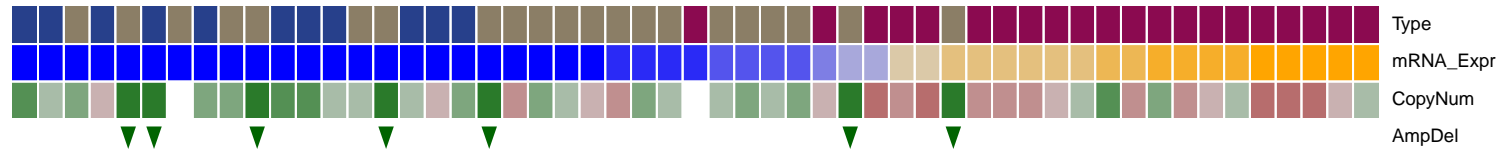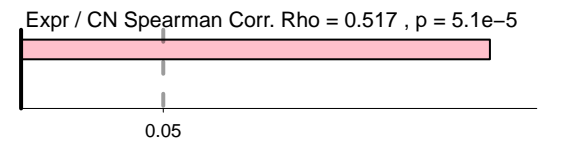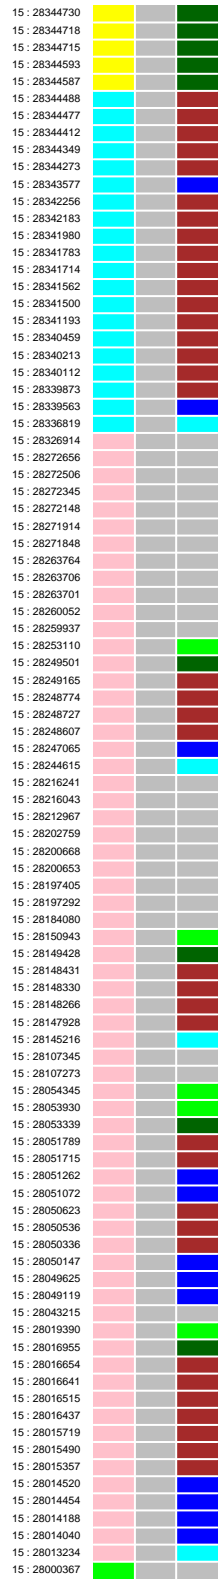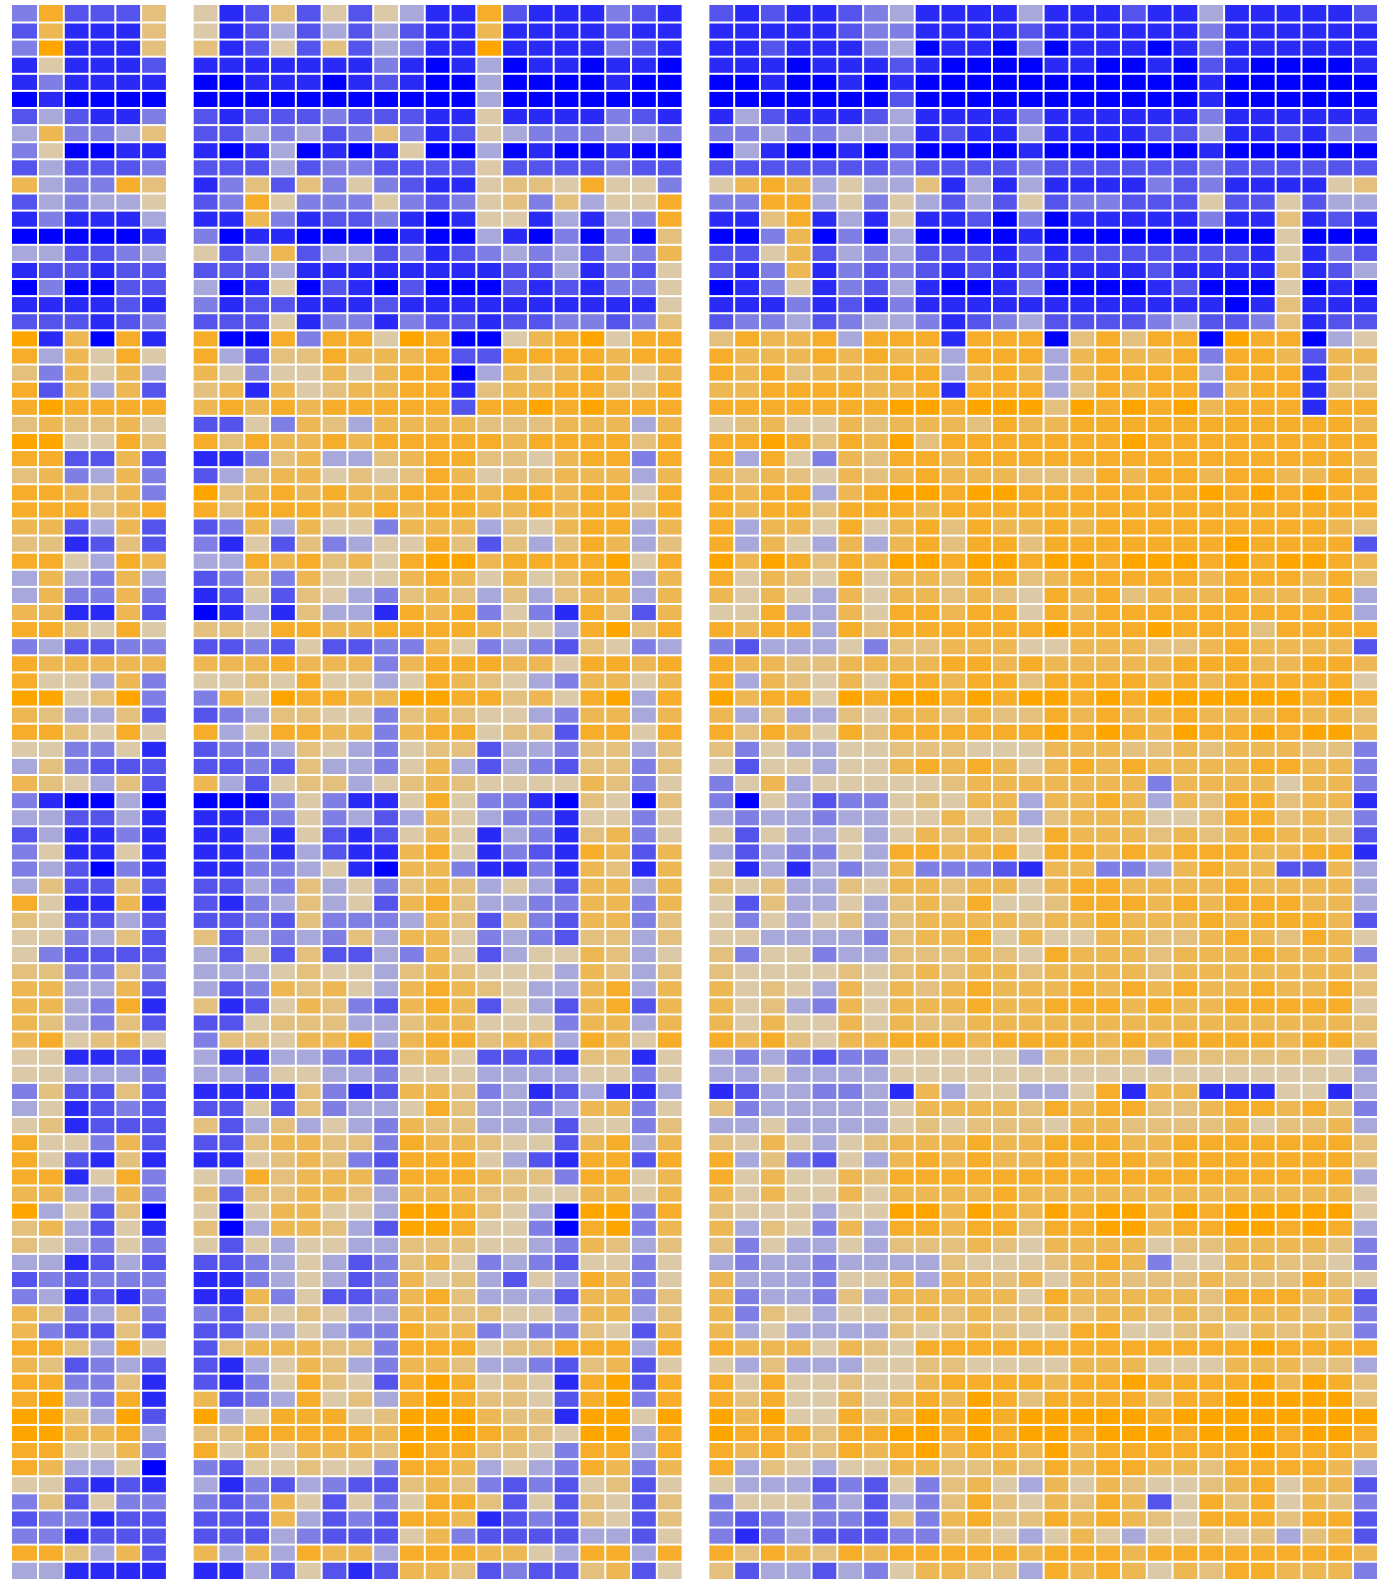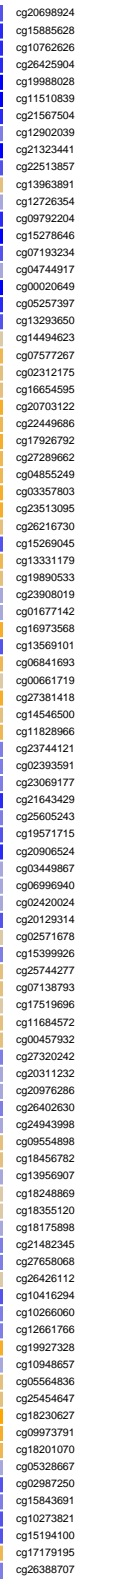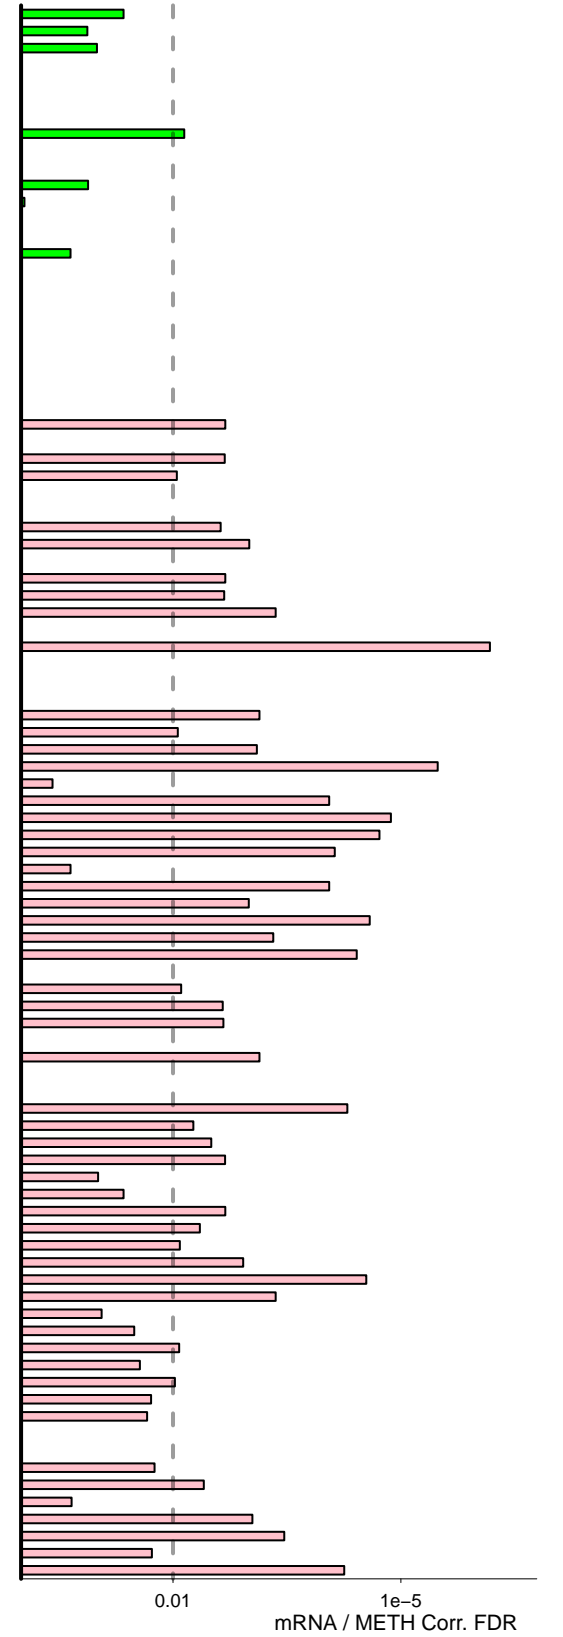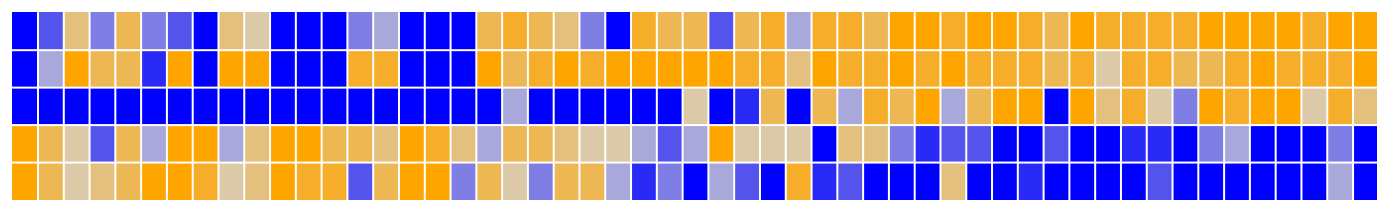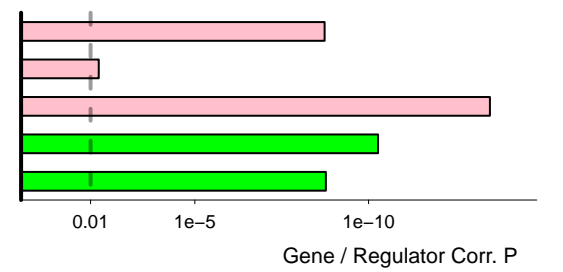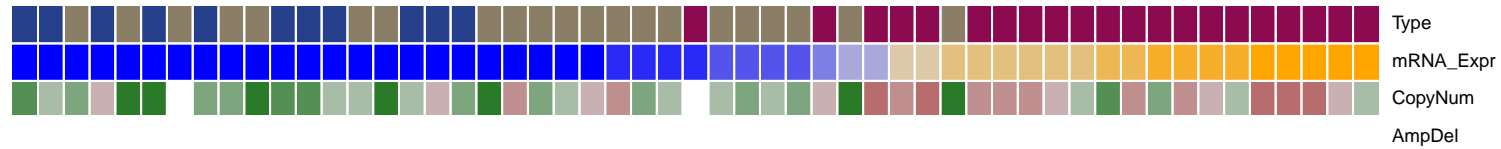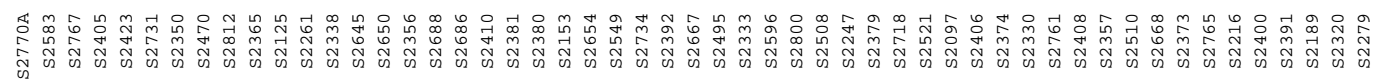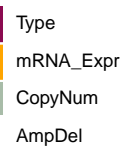

# TBC1D7

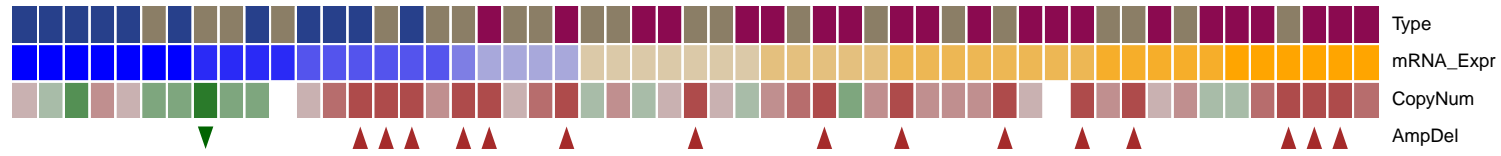

6 : 13329625  
 6 : 13326842  
 6 : 13326305  
 6 : 13325041  
 6 : 13305324  
 6 : 13303065  
 6 : 13296149  
 6 : 13287503  
 6 : 13274354  
 6 : 13274314  
 6 : 13274284  
 6 : 13274180  
 6 : 13274151

GeneLoc  
 PromoterAssoc  
 CpGIsland

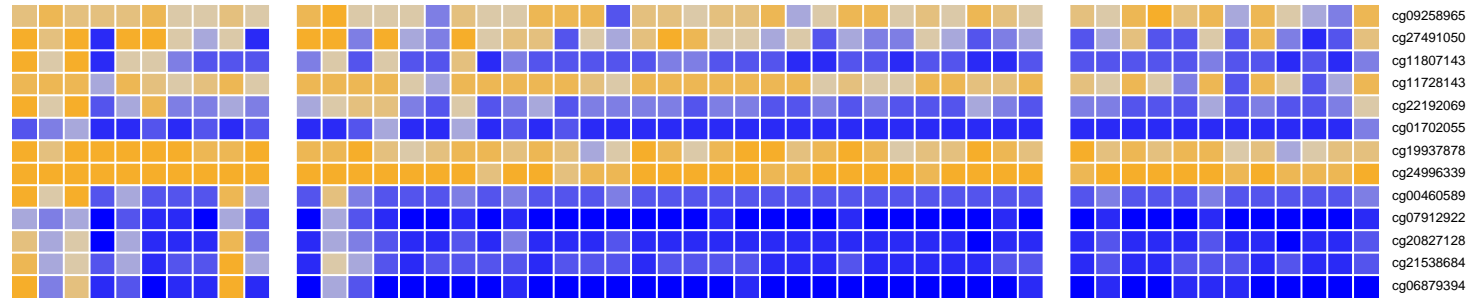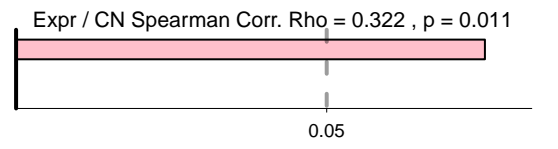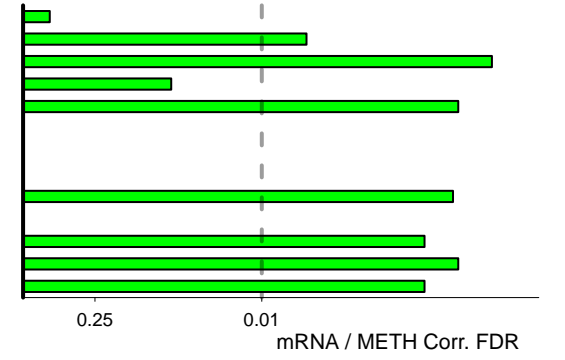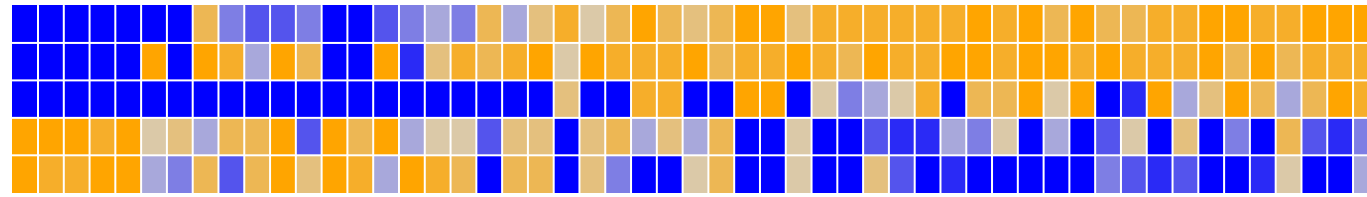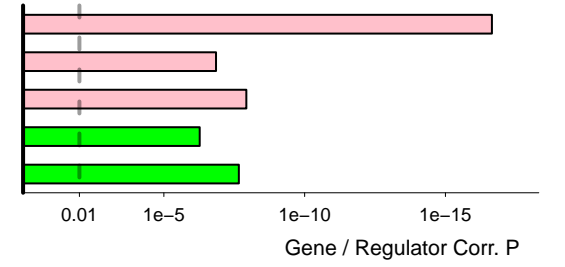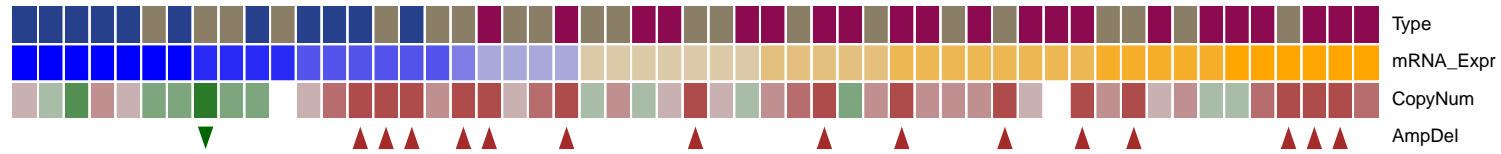

S2770A  
 S2261  
 S2470  
 S2688  
 S2125  
 S2549  
 S2686  
 S2410  
 S2645  
 S2583  
 S2350  
 S2405  
 S2356  
 S2338  
 S2495  
 S2731  
 S2800  
 S2654  
 S2761  
 S2650  
 S2153  
 S2357  
 S2365  
 S2380  
 S2216  
 S2379  
 S2812  
 S2423  
 S2408  
 S2374  
 S2767  
 S2189  
 S2373  
 S2097  
 S2668  
 S2510  
 S2734  
 S2718  
 S2596  
 S2400  
 S2667  
 S2391  
 S2392  
 S2333  
 S2330  
 S2247  
 S2279  
 S2765  
 S2508  
 S2381  
 S2406  
 S2521  
 S2320



# C10ORF90

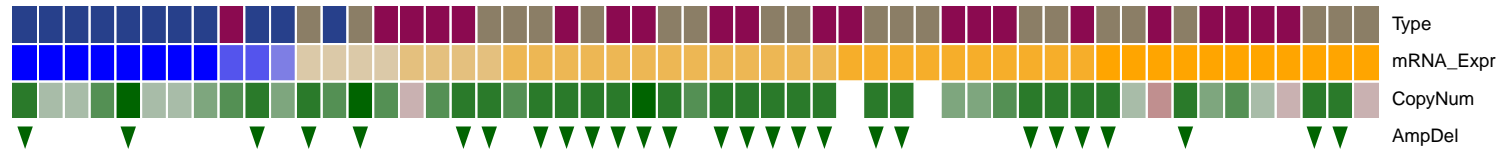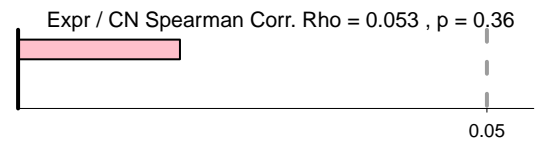

10 : 128360149  
 10 : 128359636  
 10 : 128359014  
 10 : 128275034  
 10 : 128275021  
 10 : 128275008  
 10 : 128274326  
 10 : 128258570  
 10 : 128250156  
 10 : 128233767  
 10 : 128214096  
 10 : 128213855  
 10 : 128213438  
 10 : 128211324  
 10 : 128211184  
 10 : 128210552  
 10 : 128210076  
 10 : 128210036  
 10 : 128209980  
 10 : 128209602  
 10 : 128197255  
 10 : 128194154  
 10 : 128193340  
 10 : 128193332  
 10 : 128193219  
 10 : 128192896  
 10 : 128190000  
 10 : 128165159  
 10 : 128165040  
 10 : 128153186  
 10 : 128152247  
 10 : 128152124  
 10 : 128152094  
 10 : 128152075  
 10 : 128148004

GeneLoc  
 PromoterAssoc  
 CpGIsland

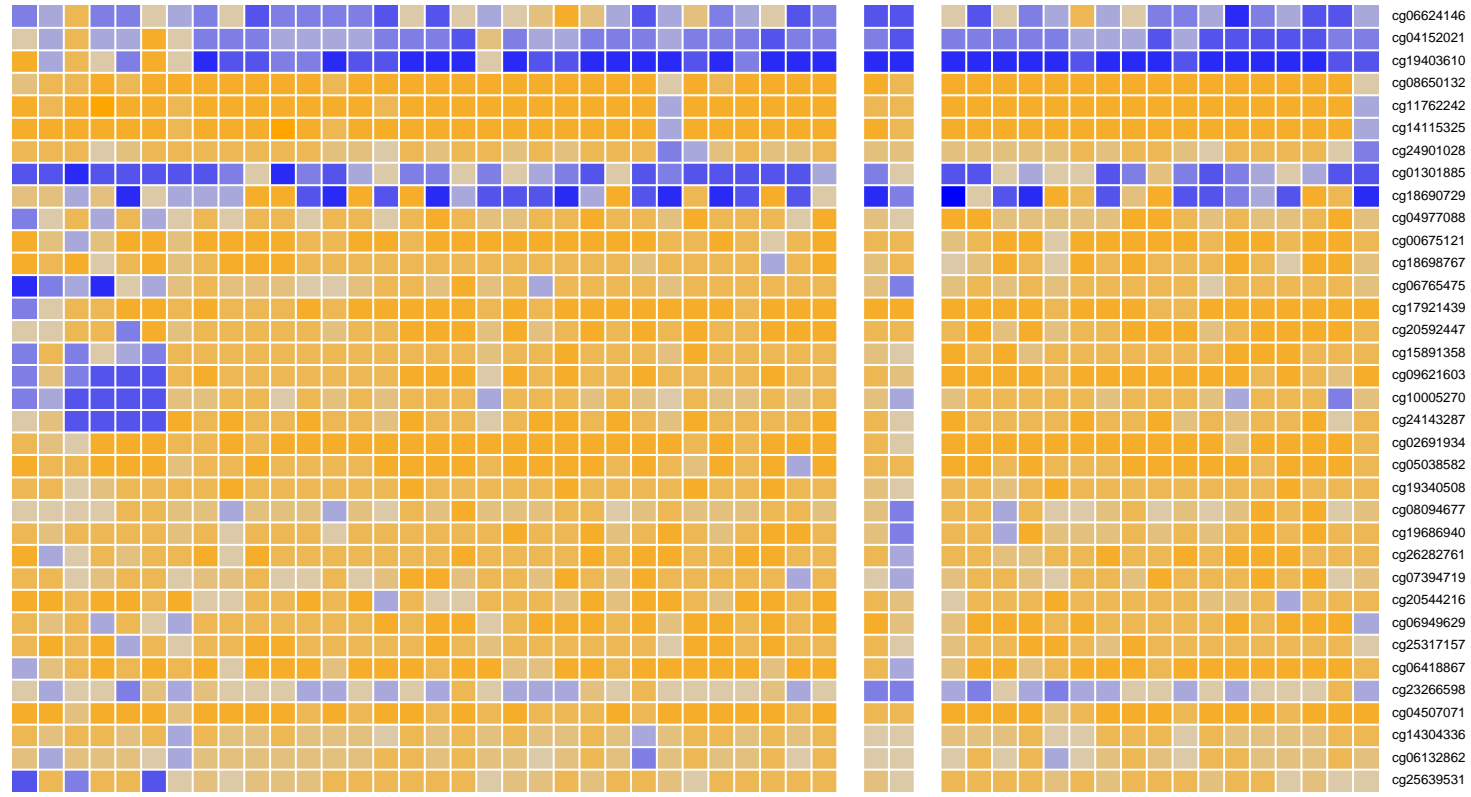

cg06624146  
 cg04152021  
 cg19403610  
 cg08650132  
 cg11762242  
 cg14115325  
 cg24901028  
 cg01301885  
 cg18690729  
 cg04977088  
 cg00675121  
 cg18698767  
 cg06765475  
 cg17921439  
 cg20592447  
 cg15891358  
 cg09621603  
 cg10005270  
 cg24143287  
 cg02691934  
 cg05038582  
 cg19340508  
 cg08094677  
 cg19686940  
 cg26282761  
 cg07394719  
 cg20544216  
 cg06949629  
 cg25317157  
 cg06418867  
 cg23266598  
 cg04507071  
 cg14304336  
 cg06132862  
 cg25639531

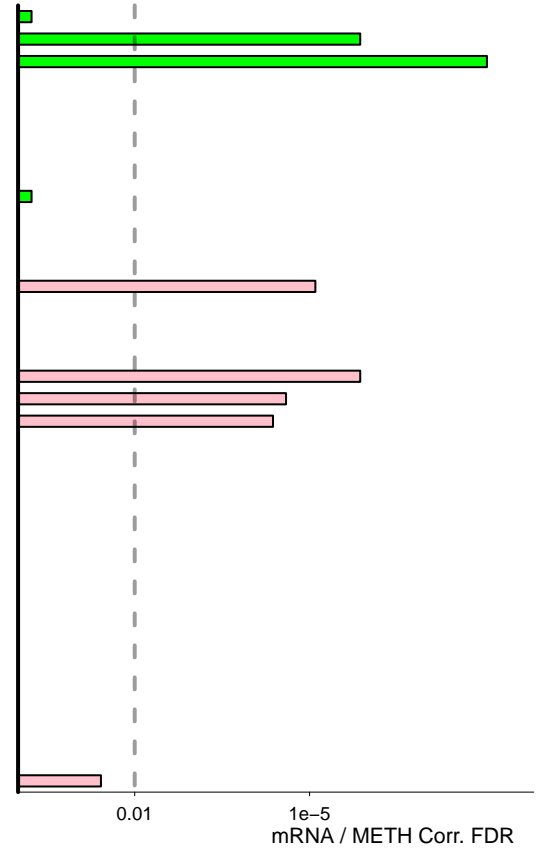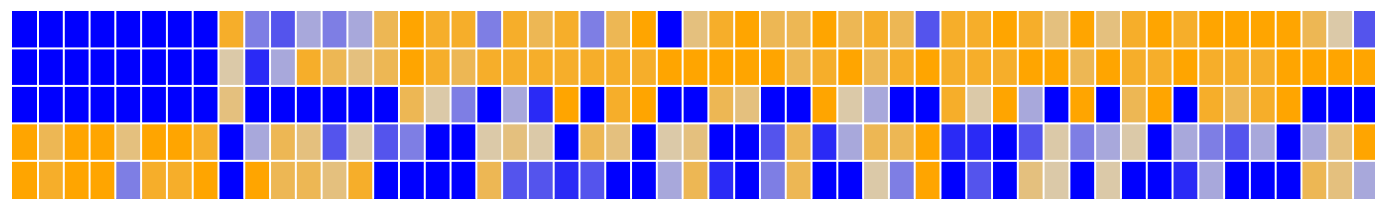

MITF  
 SOX10  
 TRPM1  
 ZEB1  
 AXL

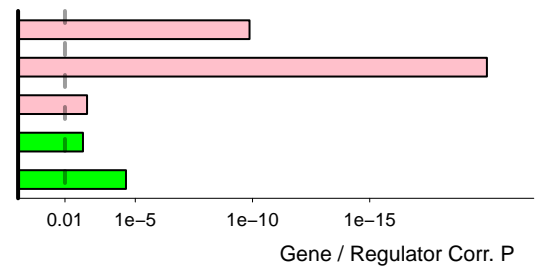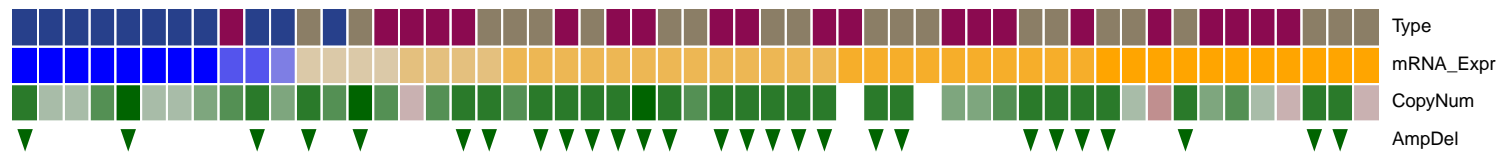

S2125  
 S2338  
 S2356  
 S2770A  
 S2686  
 S2470  
 S2261  
 S2688  
 S2357  
 S2731  
 S2583  
 S2650  
 S2405  
 S2800  
 S2761  
 S2718  
 S2189  
 S2373  
 S2654  
 S2247  
 S2333  
 S2330  
 S2645  
 S2379  
 S2408  
 S2549  
 S2153  
 S2508  
 S2279  
 S2392  
 S2423  
 S2521  
 S2667  
 S2381  
 S2380  
 S2350  
 S2510  
 S2668  
 S2374  
 S2097  
 S2767  
 S2765  
 S2812  
 S2596  
 S2391  
 S2734  
 S2320  
 S2406  
 S2216  
 S2400  
 S2410  
 S2365  
 S2495

Type  
 mRNA\_Expr  
 CopyNum  
 AmpDel

# ZNF704

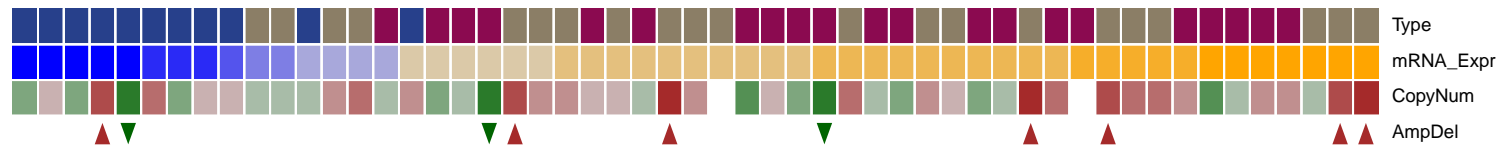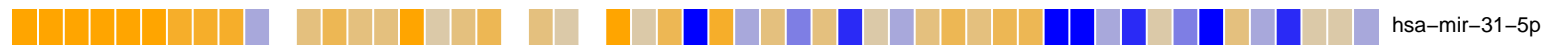

- 8 : 81787141
- 8 : 81787111
- 8 : 81786862
- 8 : 81785326
- 8 : 81785255
- 8 : 81680007
- 8 : 81665271
- 8 : 81639869
- 8 : 81639711
- 8 : 81599569
- 8 : 81599514
- 8 : 81599484
- 8 : 81571076
- 8 : 81557650
- 8 : 81552714
- 8 : 81549775

GeneLoc  
PromoterAssoc  
CpGIsland

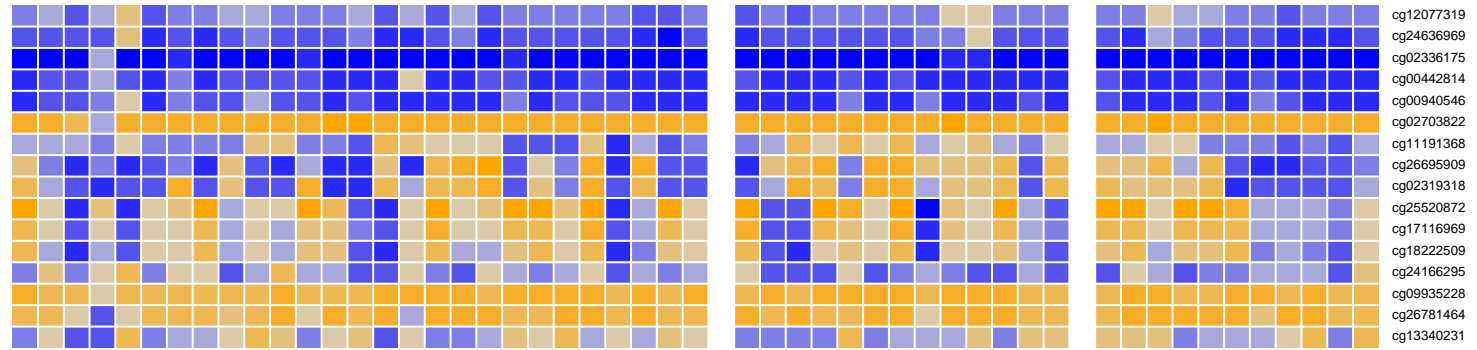

- cg12077319
- cg24636969
- cg02336175
- cg00442814
- cg00940546
- cg02703822
- cg11191368
- cg26695909
- cg02319318
- cg25520872
- cg17116969
- cg18222509
- cg24166295
- cg09935228
- cg26781464
- cg13340231

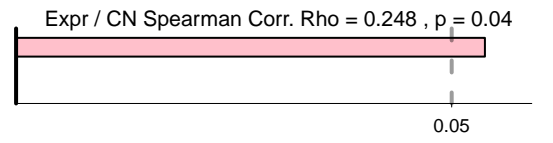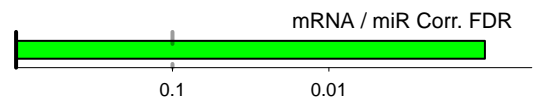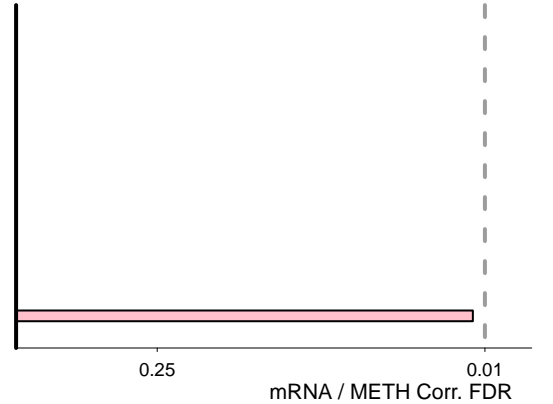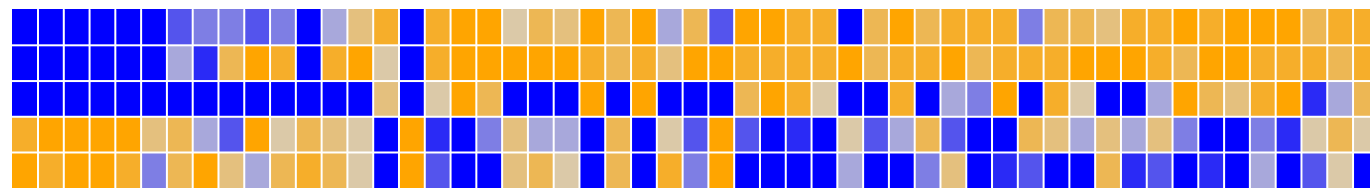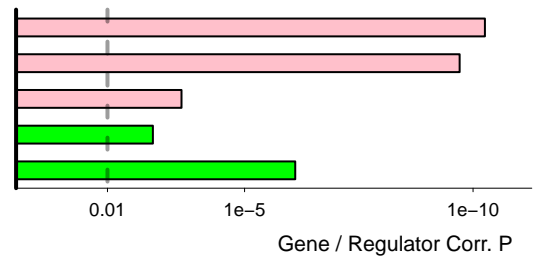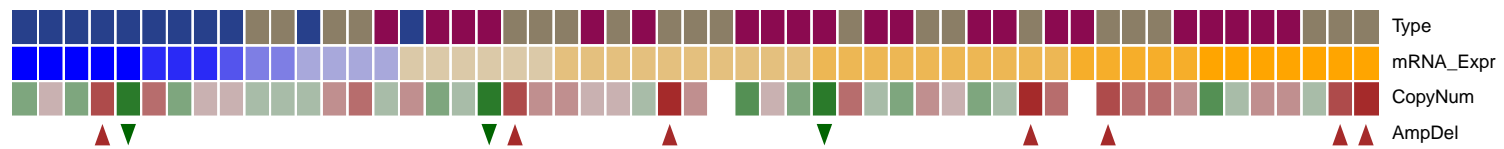

- S2688
- S2261
- S2356
- S2770A
- S2470
- S2686
- S2583
- S2731
- S2405
- S2495
- S2654
- S2338
- S2650
- S2767
- S2357
- S2125
- S2668
- S2400
- S2718
- S2365
- S2410
- S2812
- S2391
- S2423
- S2408
- S2800
- S2392
- S2350
- S2406
- S2374
- S2510
- S2189
- S2549
- S2761
- S2216
- S2380
- S2097
- S2373
- S2330
- S2645
- S2379
- S2667
- S2153
- S2734
- S2247
- S2765
- S2508
- S2279
- S2320
- S2521
- S2333
- S2381
- S2596

# CABLES1

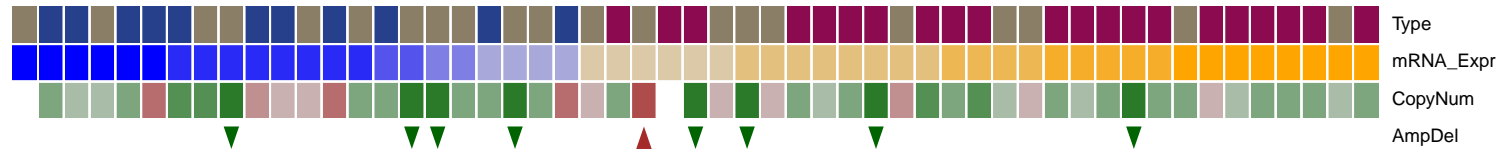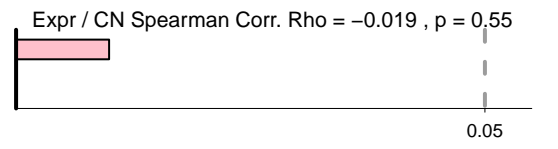

18 : 20713759  
 18 : 20714217  
 18 : 20714332  
 18 : 20714399  
 18 : 20714428  
 18 : 20714485  
 18 : 20714496  
 18 : 20715040  
 18 : 20716435  
 18 : 20716451  
 18 : 20716545  
 18 : 20716991  
 18 : 20717411  
 18 : 20717693  
 18 : 20718301  
 18 : 20735005  
 18 : 20735119  
 18 : 20735537  
 18 : 20735648  
 18 : 20735672  
 18 : 20735693  
 18 : 20735934  
 18 : 20811408  
 18 : 20811800

GeneLoc  
 PromoterAssoc  
 CpGIsland

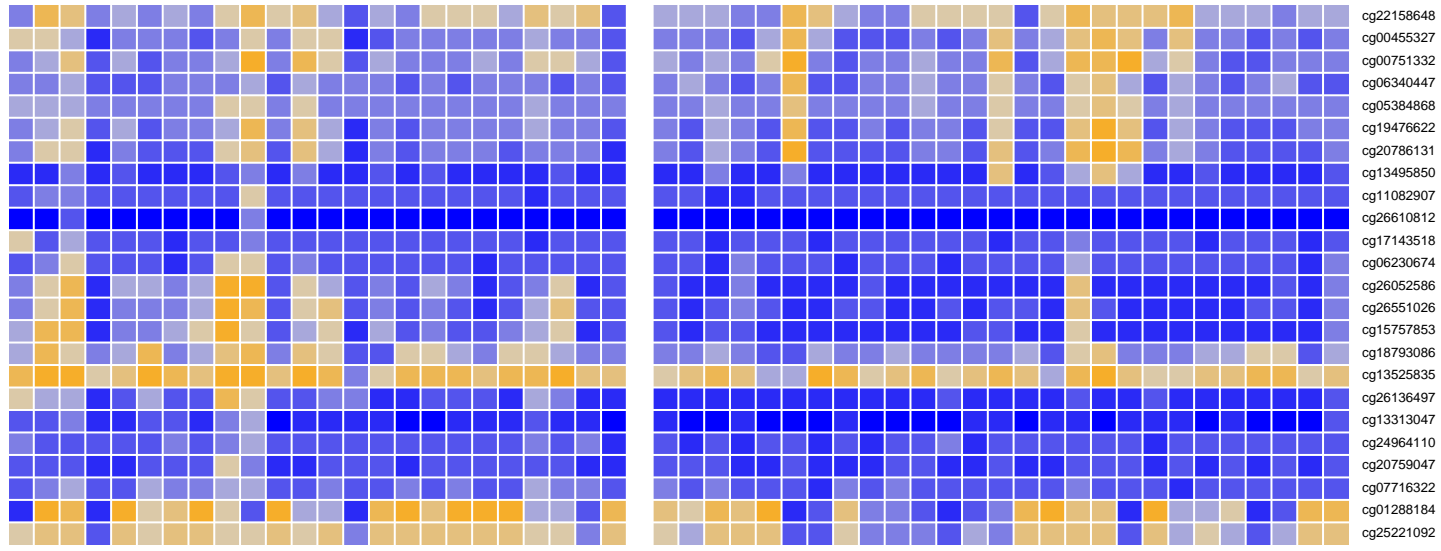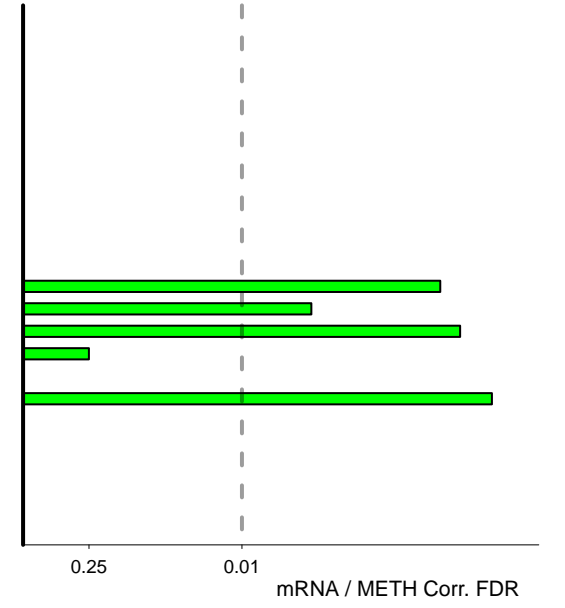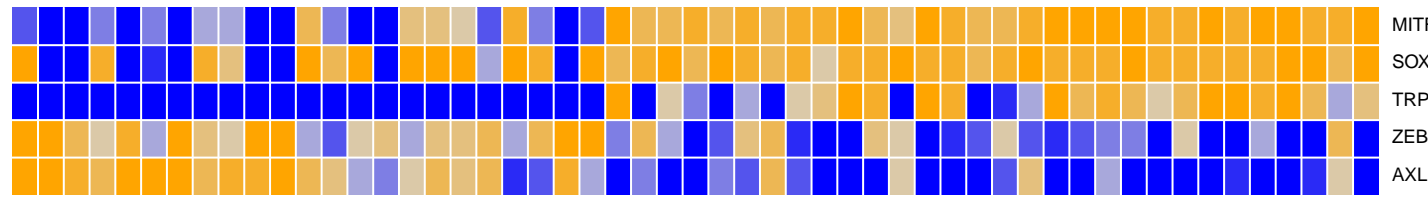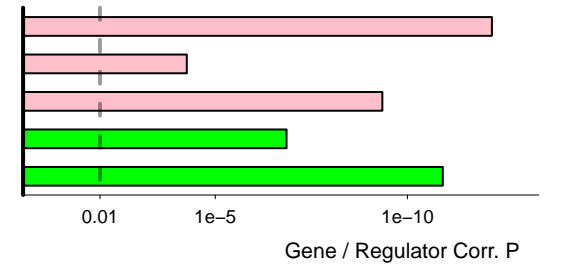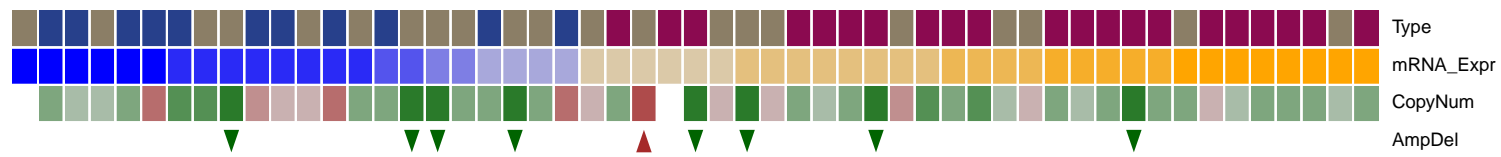

S2350  
 S2356  
 S2338  
 S2654  
 S2688  
 S2731  
 S21125  
 S2650  
 S2800  
 S2470  
 S2770A  
 S2410  
 S2405  
 S2549  
 S2686  
 S2812  
 S21153  
 S2365  
 S2583  
 S2734  
 S2645  
 S2261  
 S2495  
 S2765  
 S2380  
 S2667  
 S2373  
 S2392  
 S2247  
 S2423  
 S2668  
 S2357  
 S2408  
 S2379  
 S2767  
 S2374  
 S2510  
 S2761  
 S2333  
 S2097  
 S2521  
 S2406  
 S2320  
 S2718  
 S2189  
 S2596  
 S2391  
 S2330  
 S2216  
 S2400  
 S2508  
 S2381  
 S2279

# TRPM1

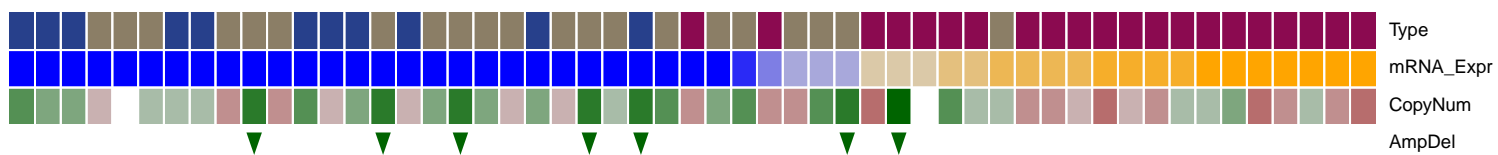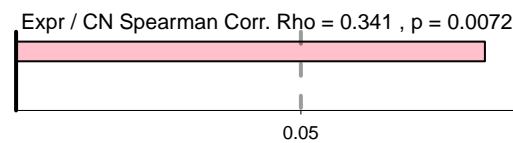

- 15 : 31452014
- 15 : 31441236
- 15 : 31428597
- 15 : 31420951
- 15 : 31395221
- 15 : 31394285
- 15 : 31394188
- 15 : 31394021
- 15 : 31393845
- 15 : 31391491
- 15 : 31383719
- 15 : 31381816
- 15 : 31381015
- 15 : 31380908
- 15 : 31379377
- 15 : 31373178
- 15 : 31372997
- 15 : 31372889
- 15 : 31372742
- 15 : 31370762
- 15 : 31362182
- 15 : 31358057
- 15 : 31357621
- 15 : 31357535
- 15 : 31357238
- 15 : 31355430
- 15 : 31355362
- 15 : 31355304
- 15 : 31319218
- 15 : 31318495
- 15 : 31318286
- 15 : 31316860
- 15 : 31316195
- 15 : 31307115
- 15 : 31295094
- 15 : 31293713

GeneLoc  
PromoterAssoc  
CpGIsland

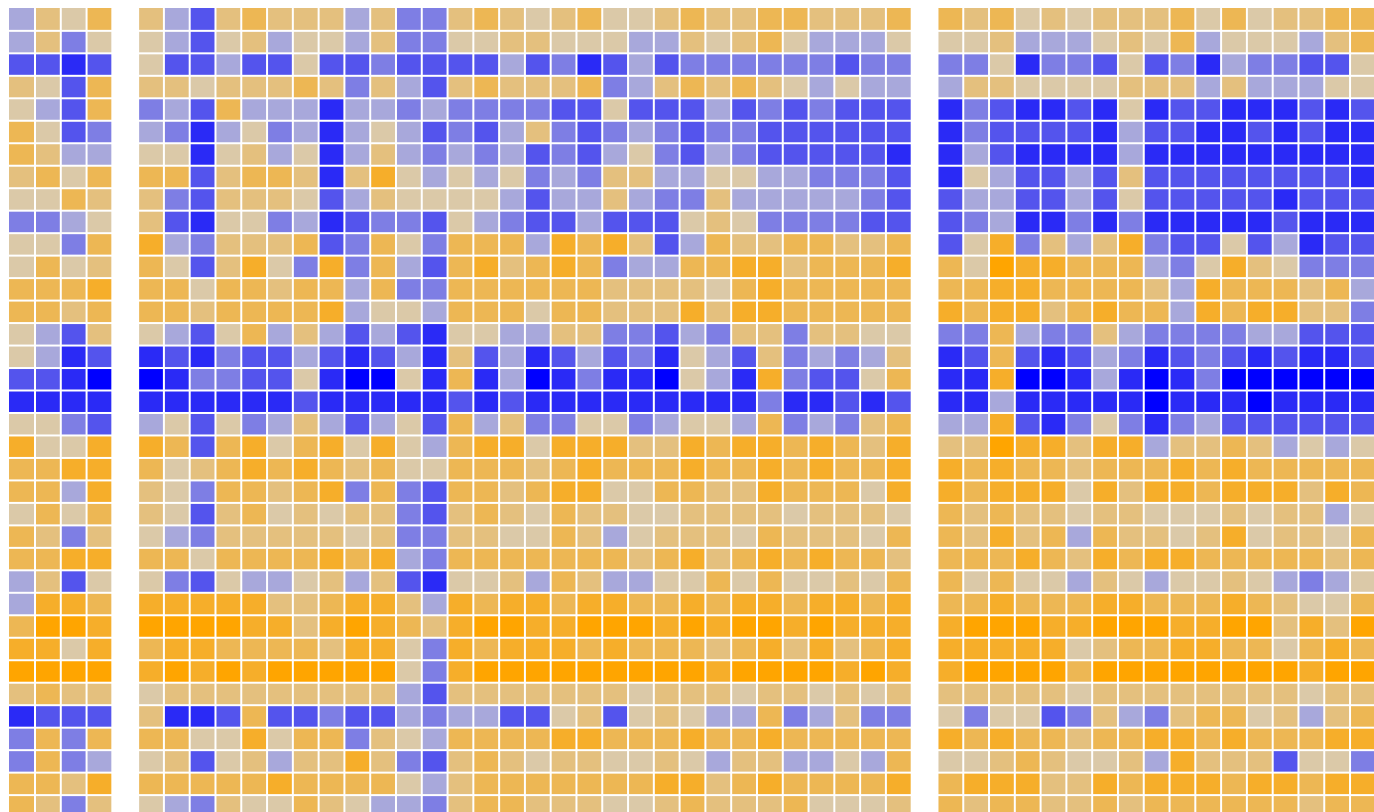

- cg16900671
- cg05533723
- cg01179320
- cg27477251
- cg16646645
- cg18085517
- cg13187539
- cg21851553
- cg14323928
- cg23693752
- cg00683980
- cg05784847
- cg04809027
- cg04773268
- cg13615100
- cg13814747
- cg20663376
- cg18075847
- cg16965794
- cg09465288
- cg09439002
- cg20260028
- cg13905606
- cg06314969
- cg09976282
- cg12241333
- cg24957518
- cg20640374
- cg03472349
- cg01233948
- cg04338556
- cg21394729
- cg09235031
- cg19661705
- cg05665095
- cg21826258

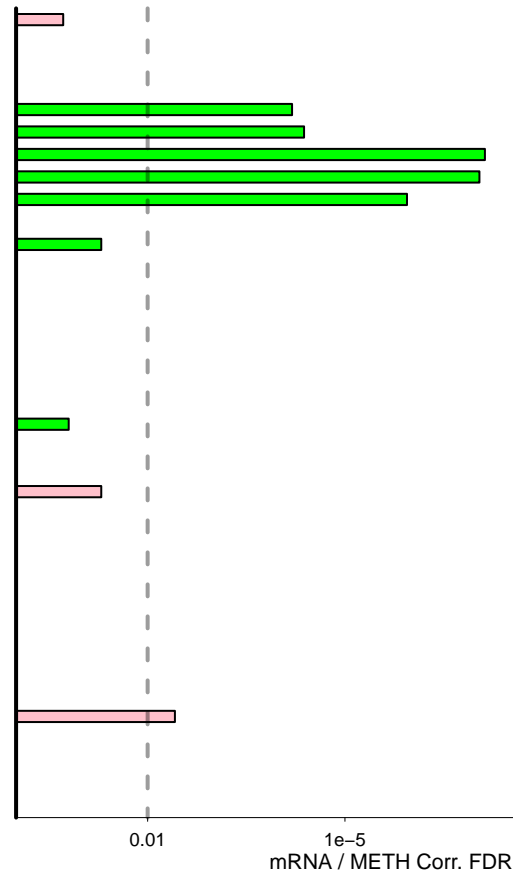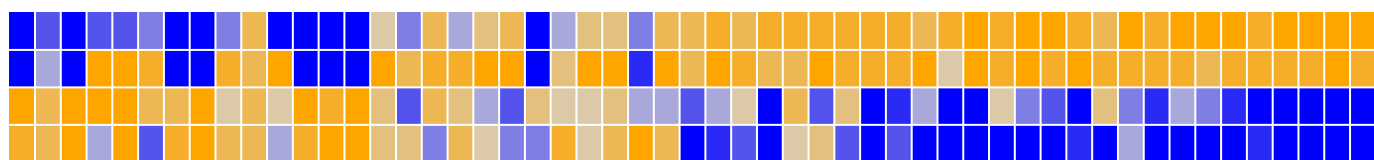

- MITF
- SOX10
- ZEB1
- AXL

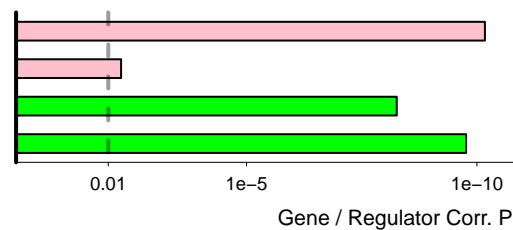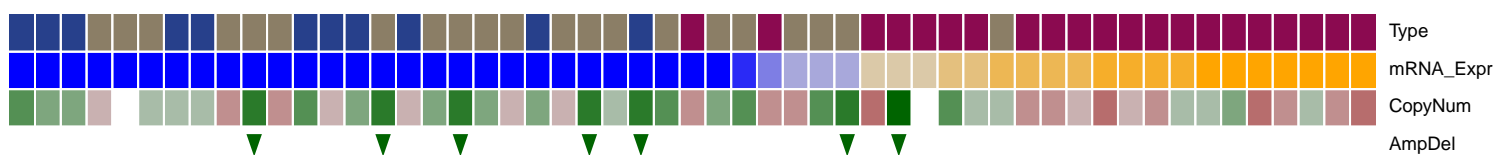

- S2470
- S2583
- S2770A
- S2495
- S2350
- S2645
- S2338
- S2356
- S2654
- S2423
- S2549
- S2261
- S2688
- S2125
- S2365
- S2405
- S2380
- S2650
- S2812
- S2392
- S2686
- S2800
- S2767
- S2153
- S2731
- S2410
- S2761
- S2734
- S2333
- S2373
- S2381
- S2097
- S2247
- S2189
- S2668
- S2667
- S2357
- S2279
- S2596
- S2718
- S2406
- S2508
- S2379
- S2320
- S2510
- S2216
- S2765
- S2521
- S2330
- S2374
- S2408
- S2400
- S2391

# WDR91

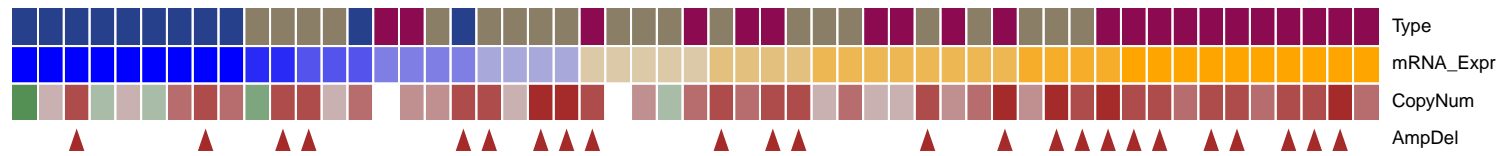

7 : 134893191  
 7 : 134885498  
 7 : 134870726

GeneLoc  
 PromoterAssoc  
 CpGIsland

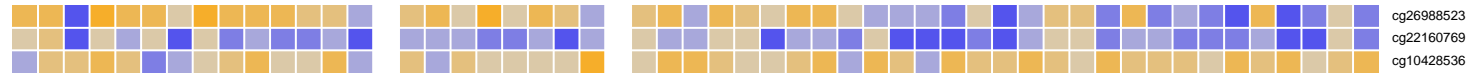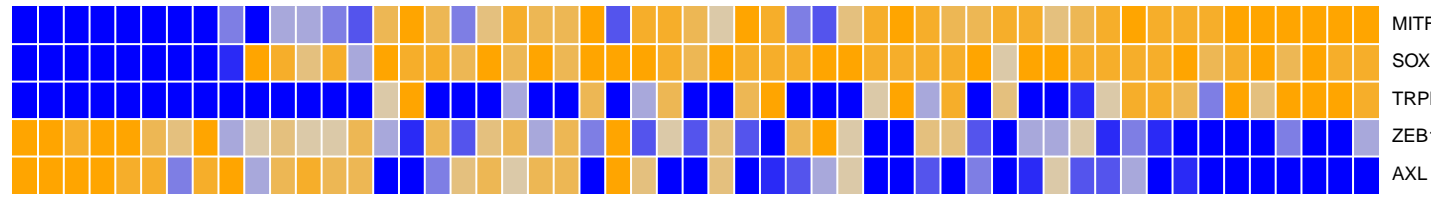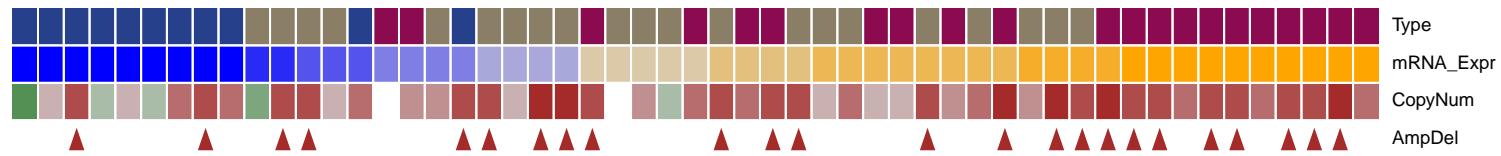

S2125  
 S2770A  
 S2688  
 S2356  
 S2261  
 S2338  
 S2686  
 S2470  
 S2731  
 S2549  
 S2650  
 S2800  
 S2654  
 S2583  
 S2667  
 S2521  
 S2380  
 S2405  
 S2153  
 S2381  
 S2410  
 S2423  
 S2718  
 S2350  
 S2097  
 S2596  
 S2761  
 S2365  
 S2406  
 S2330  
 S2645  
 S2495  
 S2767  
 S2189  
 S2391  
 S2247  
 S2379  
 S2392  
 S2357  
 S2734  
 S2812  
 S2333  
 S2668  
 S2320  
 S2510  
 S2508  
 S2373  
 S2374  
 S2279  
 S2765  
 S2400  
 S2408  
 S2216

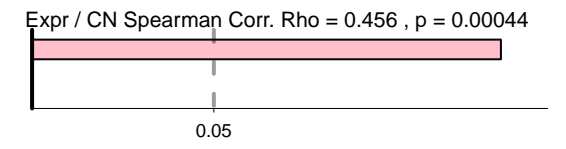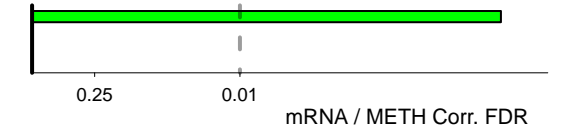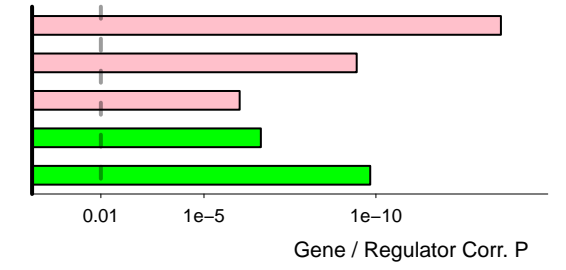

# SLC1A4

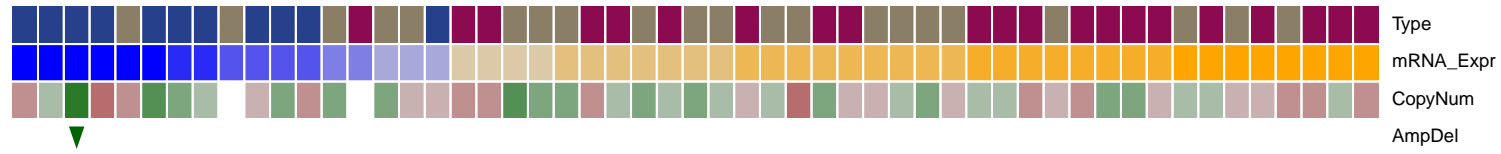

2 : 65214625  
 2 : 65215434  
 2 : 65215452  
 2 : 65215461  
 2 : 65215472  
 2 : 65215494  
 2 : 65215753  
 2 : 65216679  
 2 : 65217211  
 2 : 65217528  
 2 : 65217568  
 2 : 65217623  
 2 : 65219239  
 2 : 65220148  
 2 : 65225988

GeneLoc  
 PromoterAssoc  
 CpGIsland

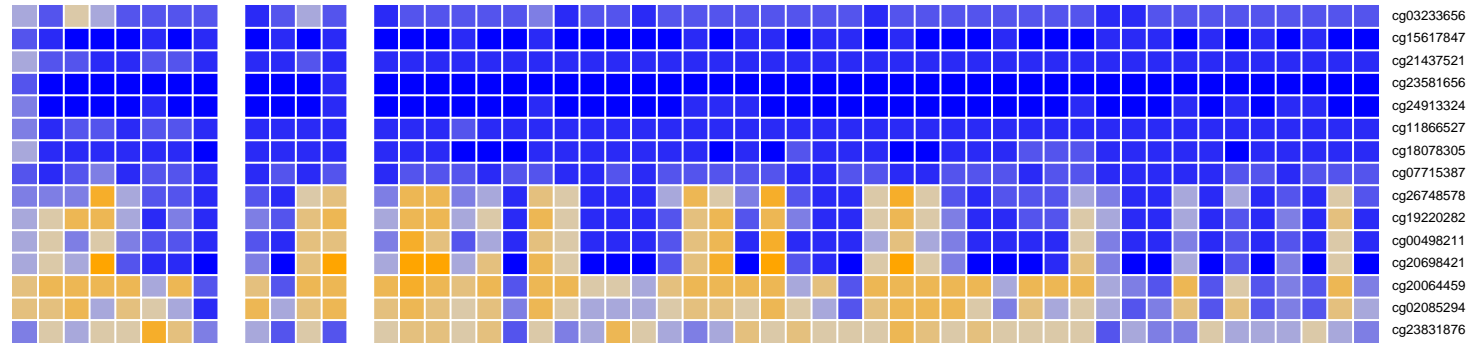

cg03233656  
 cg15617847  
 cg21437521  
 cg23581656  
 cg24913324  
 cg11866527  
 cg18078305  
 cg07715387  
 cg26748578  
 cg19220282  
 cg00498211  
 cg20698421  
 cg20064459  
 cg02085294  
 cg23831876

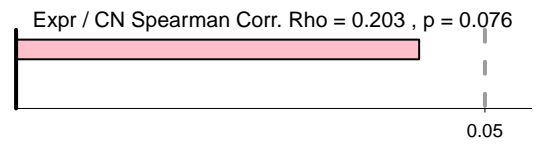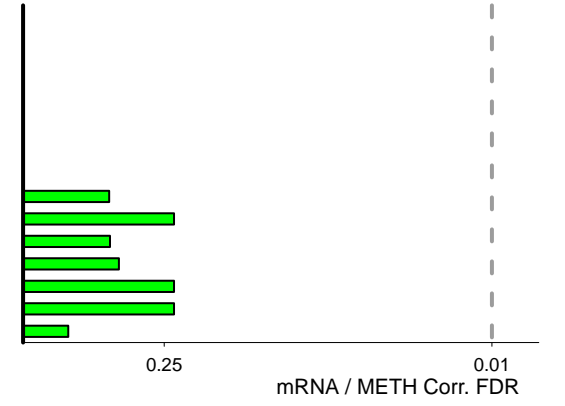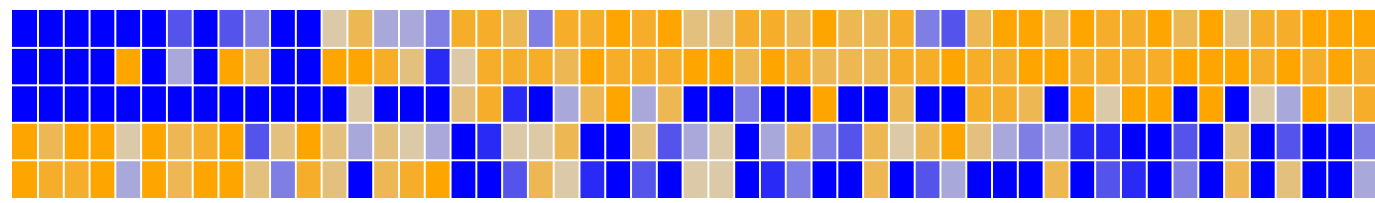

MITF  
 SOX10  
 TRPM1  
 ZEB1  
 AXL

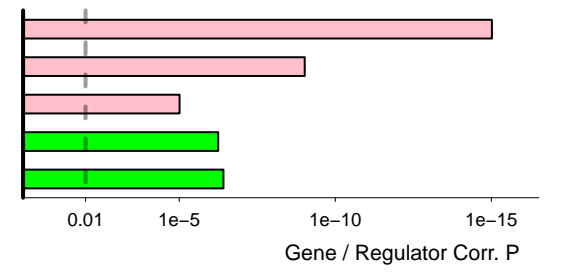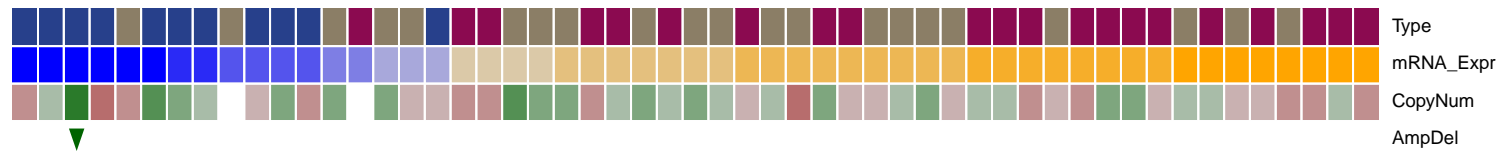

S2770A  
 S2338  
 S2470  
 S2356  
 S2549  
 S2125  
 S2583  
 S2688  
 S2350  
 S2405  
 S2686  
 S2261  
 S2365  
 S2667  
 S2650  
 S2800  
 S2731  
 S2357  
 S2510  
 S2333  
 S2654  
 S2381  
 S2508  
 S2408  
 S2247  
 S2406  
 S2812  
 S2767  
 S2373  
 S2734  
 S2380  
 S2765  
 S2761  
 S2423  
 S2596  
 S2645  
 S2495  
 S2379  
 S2216  
 S2718  
 S2410  
 S2521  
 S2668  
 S2330  
 S2374  
 S2392  
 S2400  
 S2153  
 S2189  
 S2097  
 S2391  
 S2279  
 S2320

Type  
 mRNA\_Expr  
 CopyNum  
 AmpDel

# RAB27A

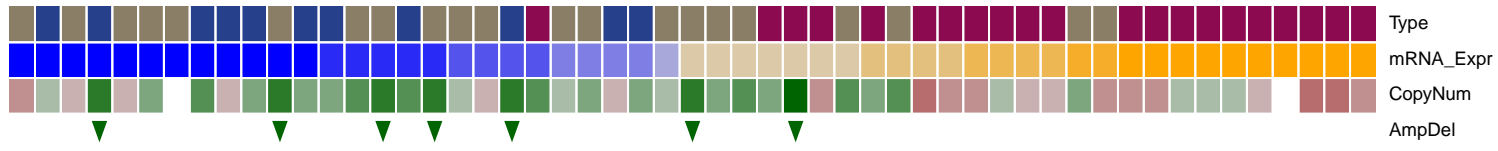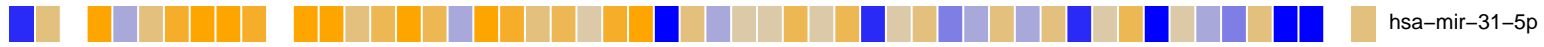

15 : 55610624  
 15 : 55583094  
 15 : 55581420  
 15 : 55574912  
 15 : 55569533  
 15 : 55564203  
 15 : 55563294  
 15 : 55562773  
 15 : 55562699  
 15 : 55562403  
 15 : 55559759  
 15 : 55543264  
 15 : 55513621

GeneLoc  
 PromoterAssoc  
 CpGIsland

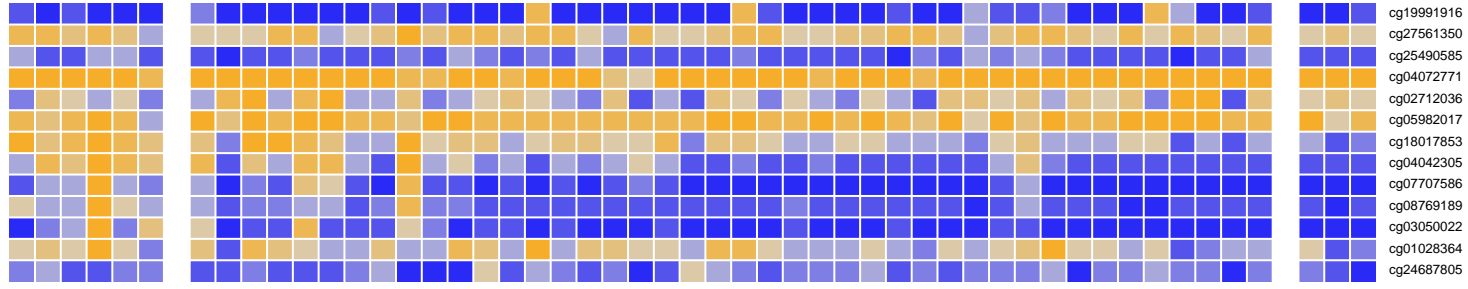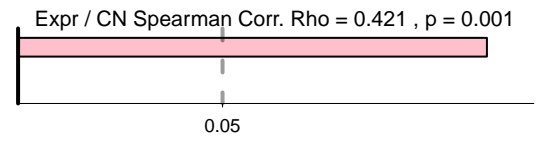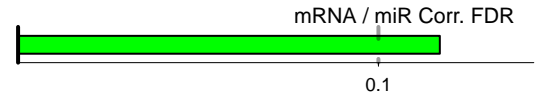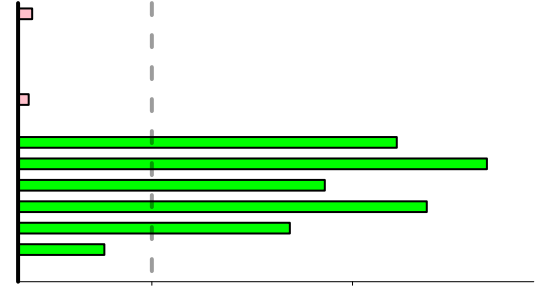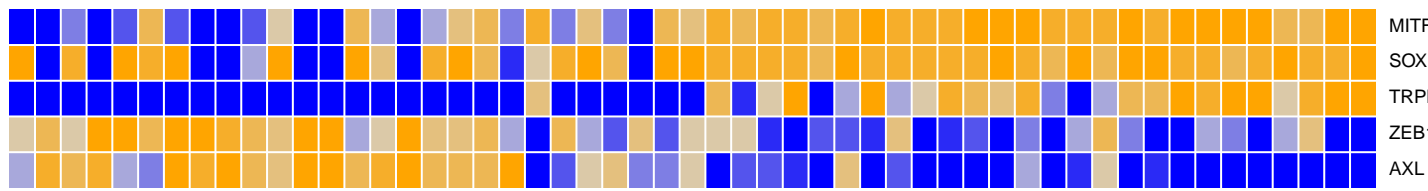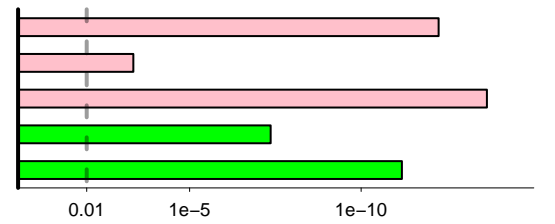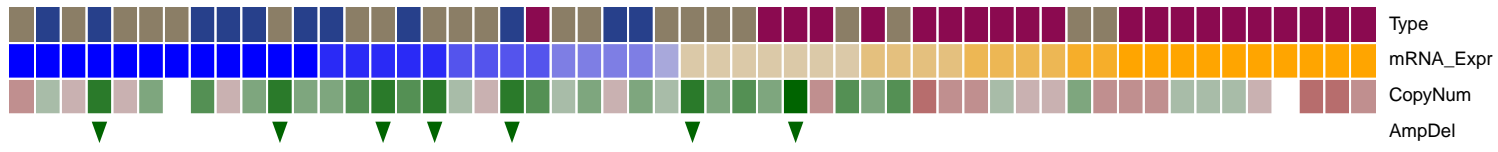

S2549  
 S2338  
 S2654  
 S2470  
 S2495  
 S2380  
 S2350  
 S2261  
 S2688  
 S2583  
 S2365  
 S2356  
 S2125  
 S2410  
 S2800  
 S2770A  
 S2650  
 S2153  
 S2423  
 S2731  
 S2357  
 S2645  
 S2812  
 S2405  
 S2686  
 S2392  
 S2767  
 S2596  
 S2333  
 S2668  
 S2330  
 S2761  
 S2097  
 S2521  
 S2247  
 S2189  
 S2510  
 S2406  
 S2279  
 S2320  
 S2373  
 S2734  
 S2381  
 S2718  
 S2508  
 S2408  
 S2216  
 S2765  
 S2374  
 S2667  
 S2379  
 S2391  
 S2400

# GJB1

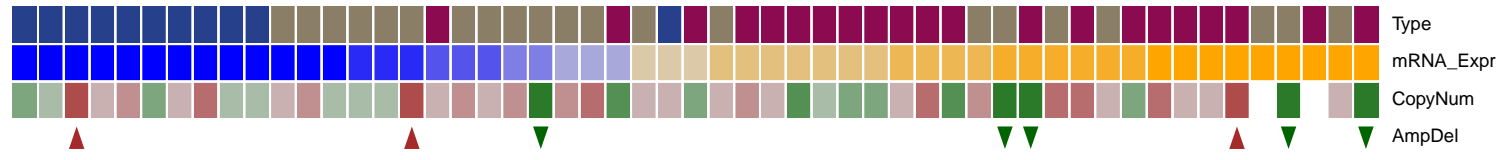

X: 70433609  
X: 70434406  
X: 70434651  
X: 70435029  
X: 70435082  
X: 70440209  
X: 70442524  
X: 70442604  
X: 70442693  
X: 70442743  
X: 70442895  
X: 70443001  
X: 70443093  
X: 70444047  
X: 70444178  
X: 70444255  
X: 70444480

GeneLoc  
PromoterAssoc  
CpGIsland

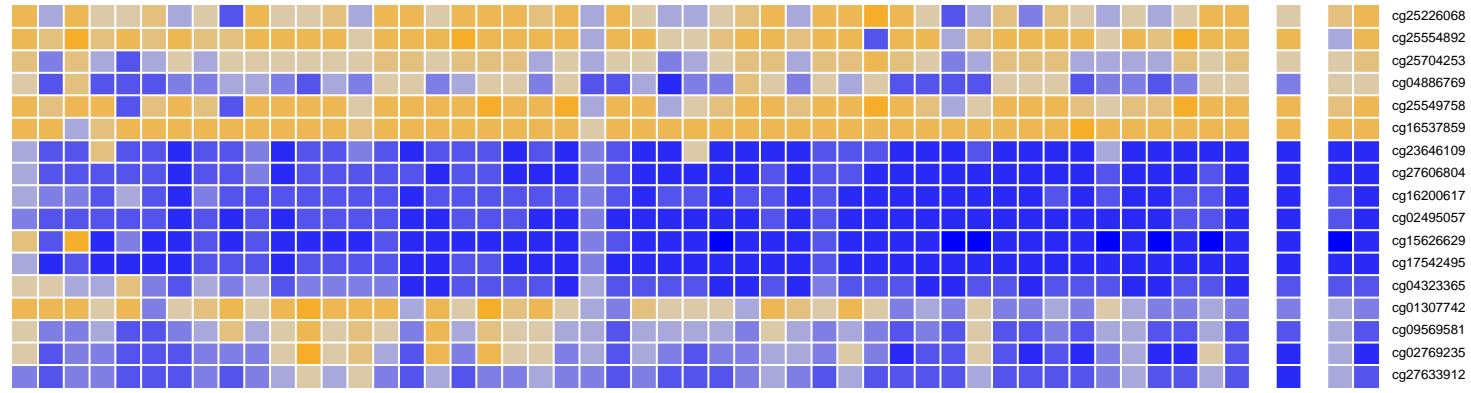

cg25226068  
cg25554892  
cg25704253  
cg04886769  
cg25549758  
cg16537859  
cg23646109  
cg27606804  
cg16200617  
cg02495057  
cg15626629  
cg17542495  
cg04323365  
cg01307742  
cg09569581  
cg02769235  
cg27633912

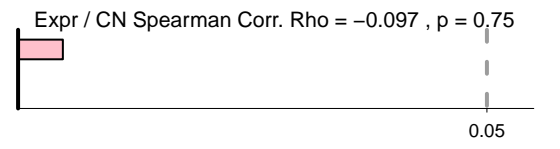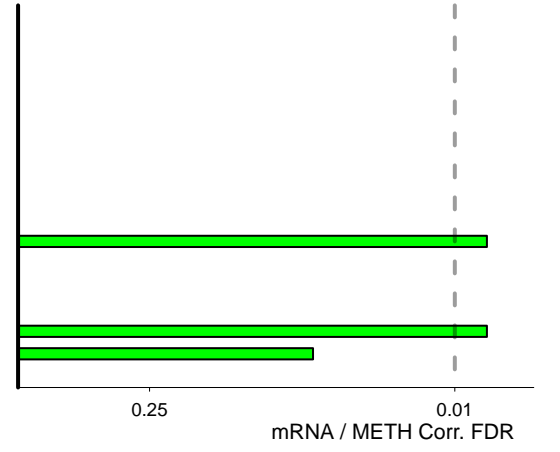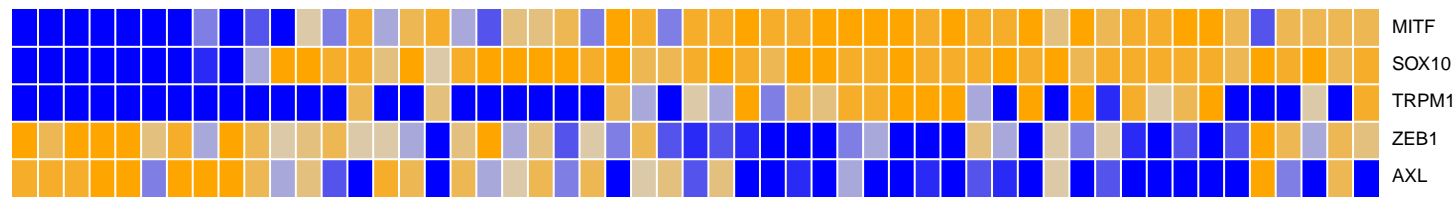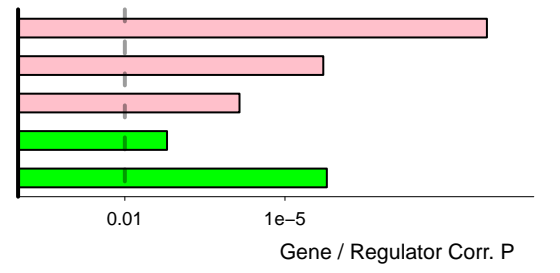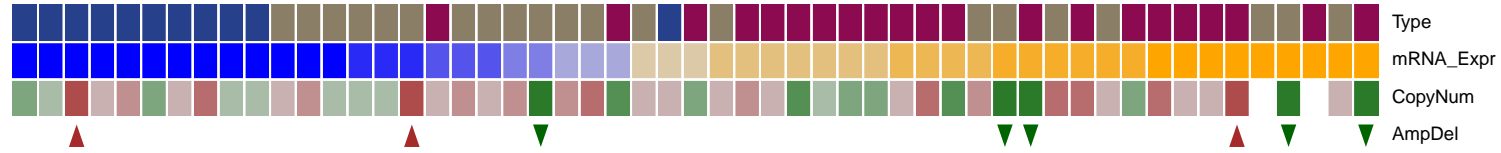

S2261  
S2338  
S2470  
S2770A  
S2125  
S2686  
S2688  
S2731  
S2356  
S2583  
S2549  
S2365  
S2645  
S2596  
S2800  
S2410  
S2357  
S2650  
S2495  
S2812  
S2153  
S2392  
S2654  
S2718  
S2381  
S2405  
S2668  
S2097  
S2521  
S2373  
S2508  
S2279  
S2320  
S2216  
S2400  
S2330  
S2374  
S2247  
S2734  
S2408  
S2767  
S2765  
S2333  
S2510  
S2189  
S2406  
S2391  
S2761  
S2350  
S2380  
S2667  
S2423  
S2379



# IGSF8

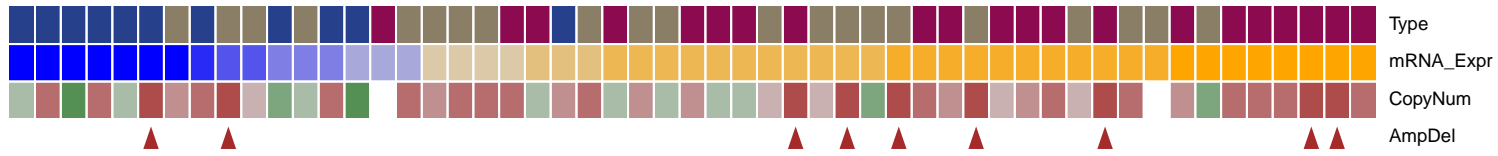

1:160068471  
 1:160068587  
 1:160064985  
 1:160061413

GeneLoc  
 PromoterAssoc  
 CpGIsland

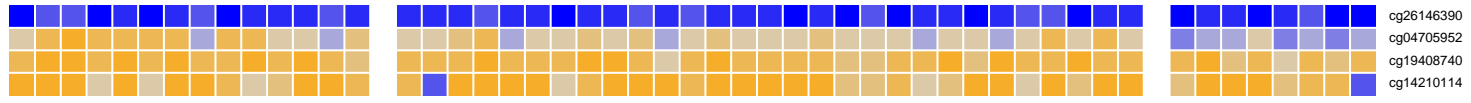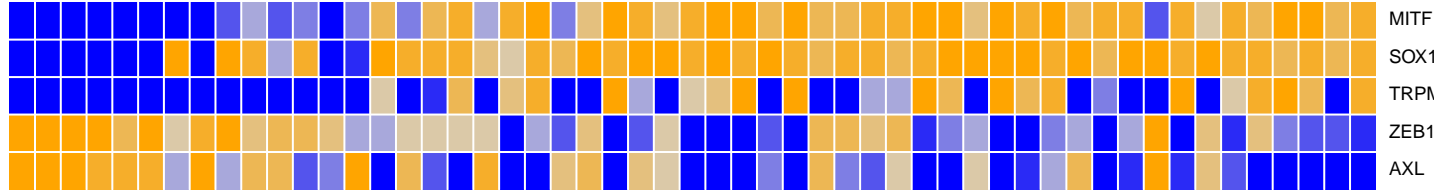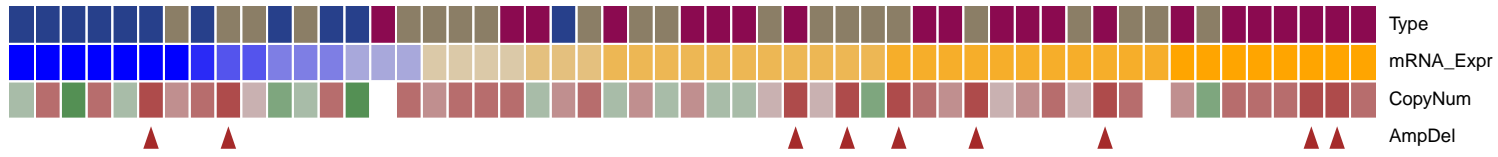

S2356  
 S2125  
 S2770A  
 S2261  
 S2338  
 S2470  
 S2549  
 S2688  
 S2495  
 S2650  
 S2583  
 S2645  
 S2686  
 S2731  
 S2667  
 S2654  
 S2333  
 S2596  
 S2800  
 S2357  
 S2216  
 S2405  
 S2153  
 S2408  
 S2097  
 S2767  
 S2189  
 S2279  
 S2391  
 S2392  
 S2374  
 S2423  
 S2380  
 S2247  
 S2381  
 S2521  
 S2718  
 S2812  
 S2400  
 S2508  
 S2320  
 S2410  
 S2373  
 S2734  
 S2350  
 S2330  
 S2365  
 S2668  
 S2379  
 S2765  
 S2406  
 S2761  
 S2510

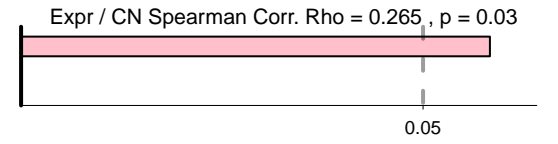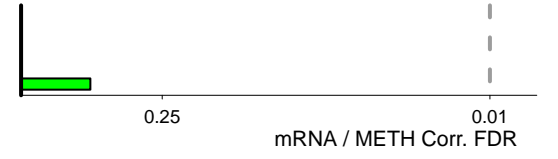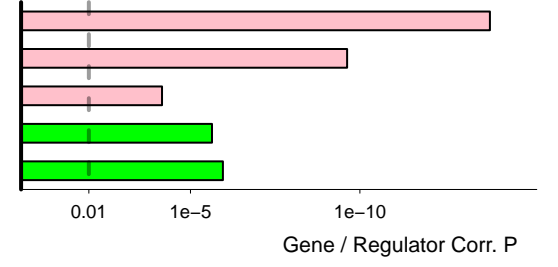

# GPR137B

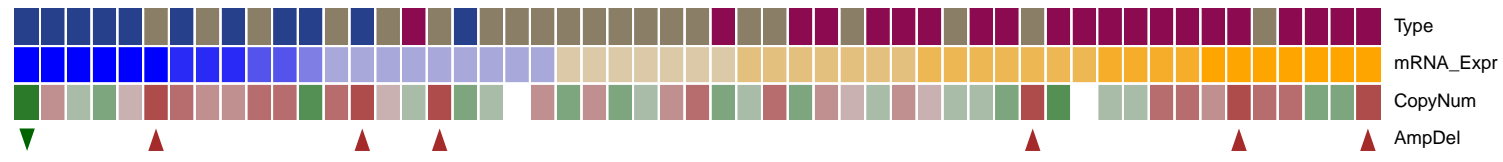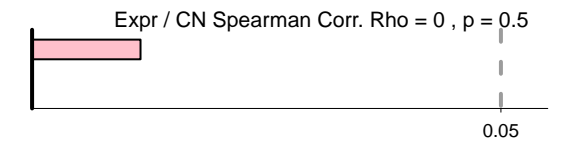

1: 236304341  
1: 236304396  
1: 236304503  
1: 236304799  
1: 236305010  
1: 236305024  
1: 236306640  
1: 236308094  
1: 236309960  
1: 236318427  
1: 236318493  
1: 236318545

GeneLoc  
PromoterAssoc  
CpGIsland

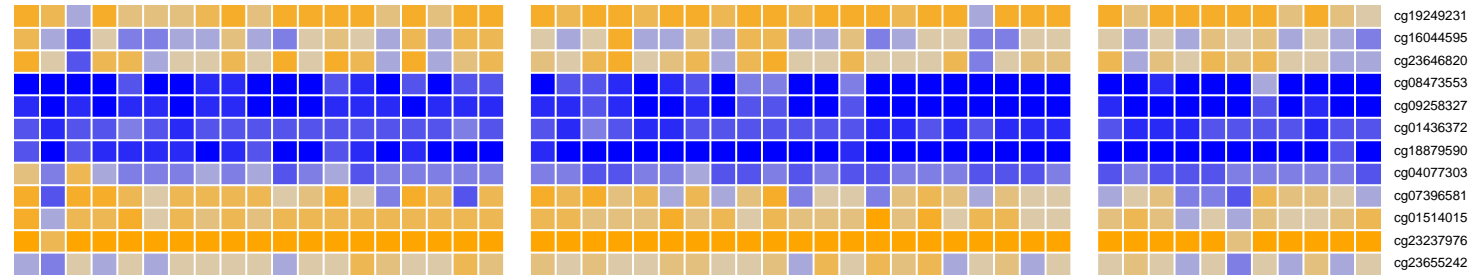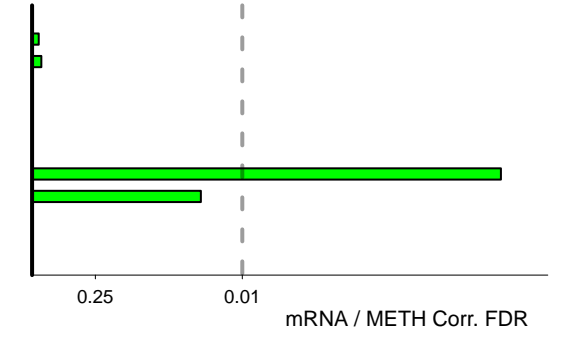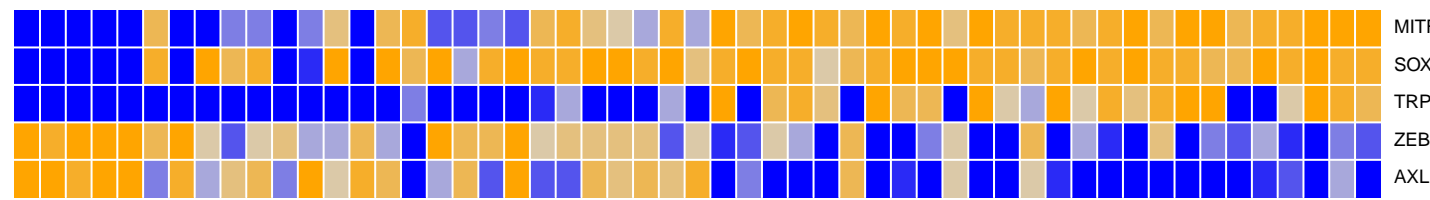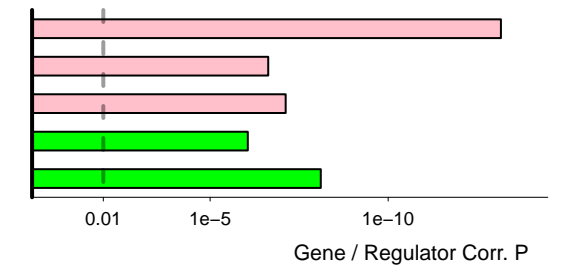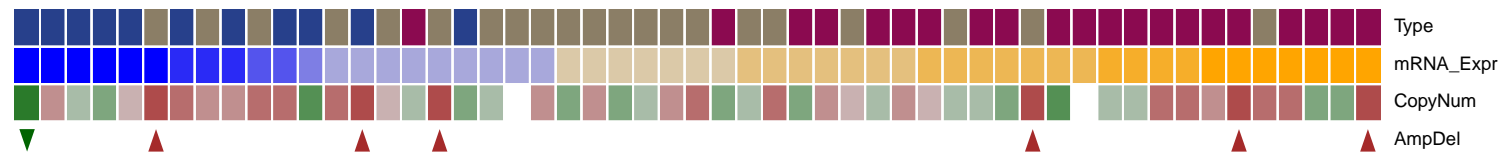

S2770A  
S2688  
S2470  
S2356  
S2125  
S2380  
S2261  
S2549  
S2405  
S2654  
S2686  
S2731  
S2812  
S2338  
S2410  
S2373  
S2495  
S2583  
S2645  
S2350  
S2333  
S2247  
S2153  
S2365  
S2650  
S2097  
S2800  
S2521  
S2392  
S2596  
S2216  
S2357  
S2423  
S2408  
S2508  
S2718  
S2767  
S2391  
S2189  
S2381  
S2330  
S2667  
S2510  
S2279  
S2379  
S2374  
S2765  
S2761  
S2734  
S2668  
S2400  
S2320  
S2406

# SEMA6A

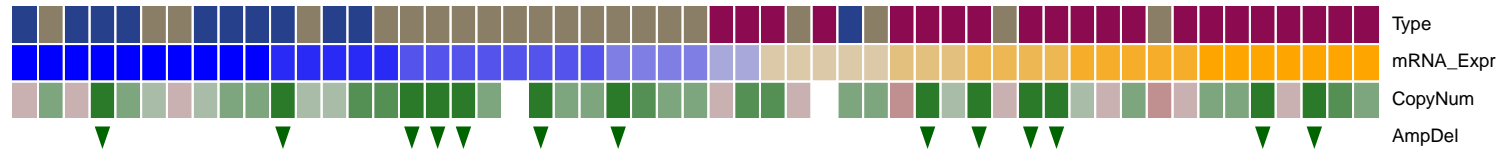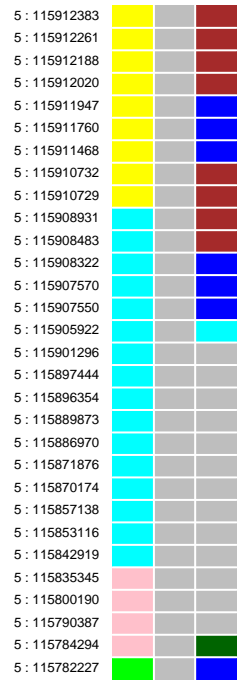

Genes  
Promoter  
CpG  
AmpDel

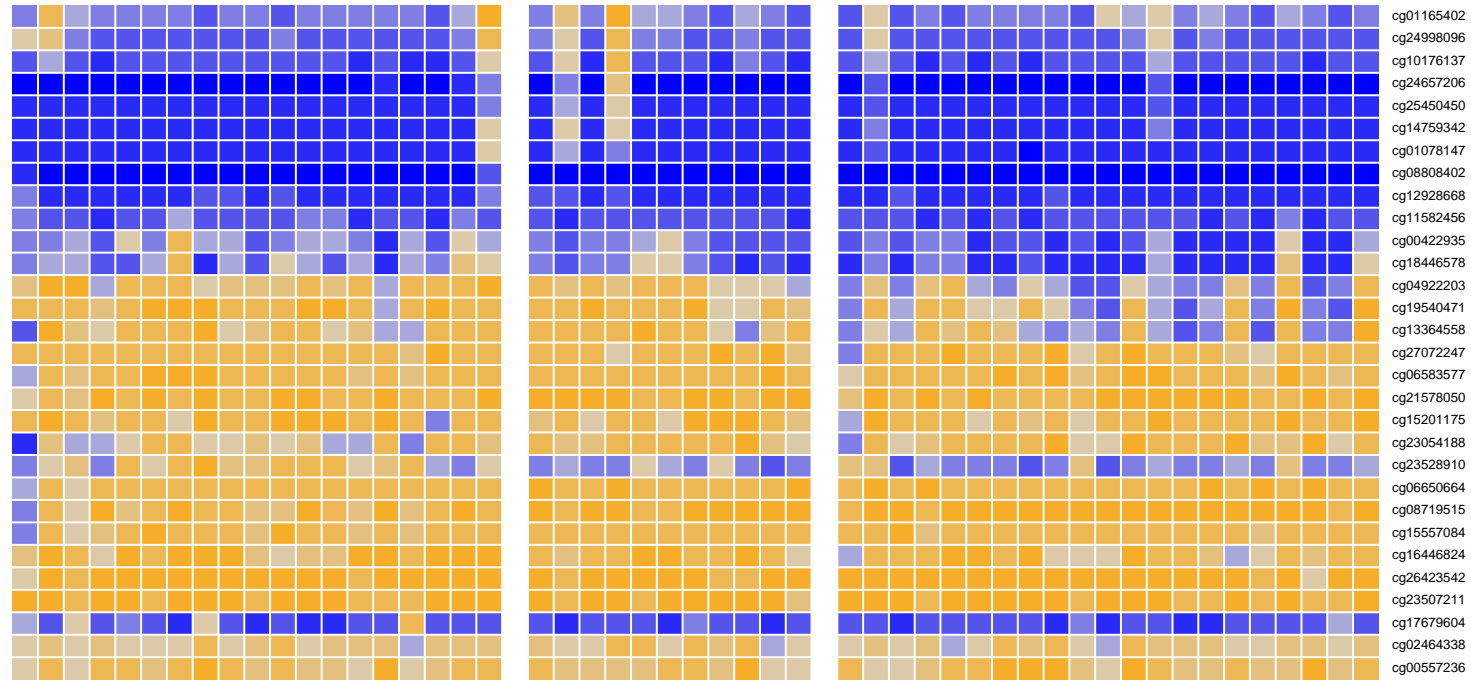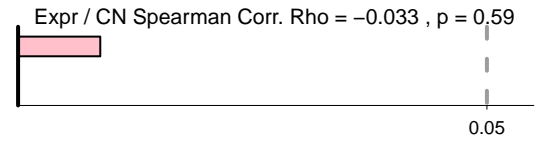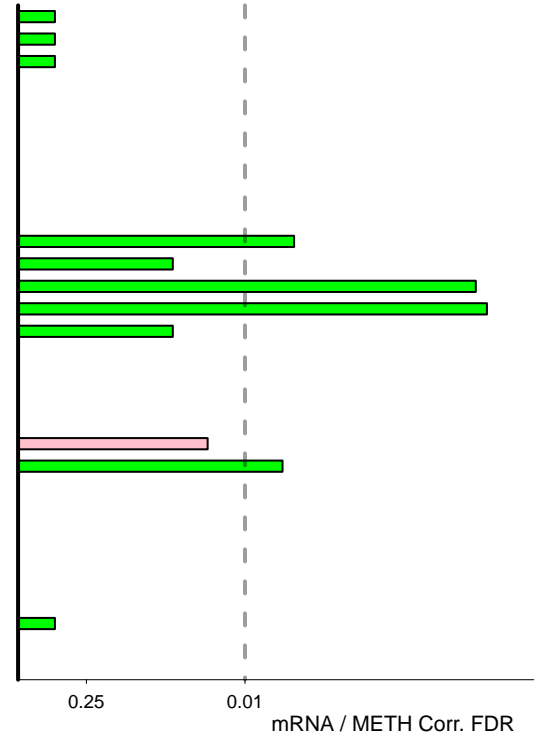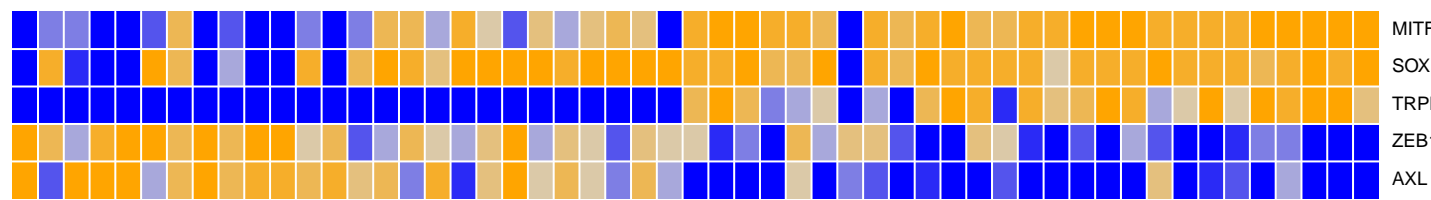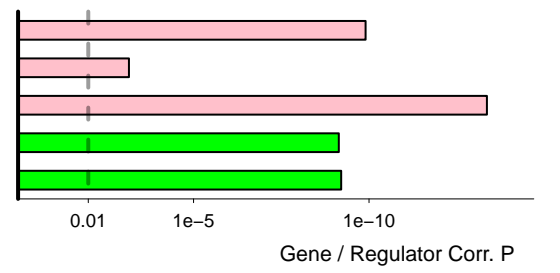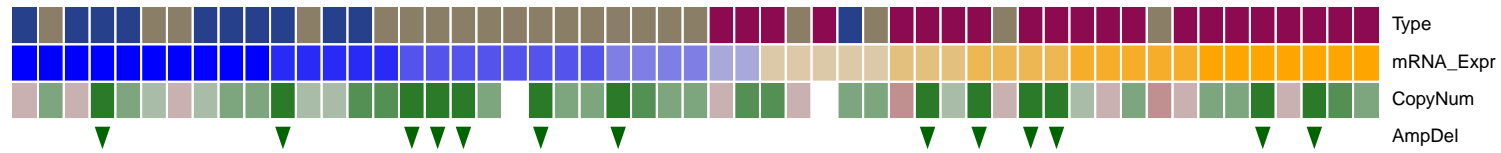

S2770A  
S2645  
S2731  
S2688  
S2356  
S2495  
S2423  
S2125  
S2583  
S2261  
S2470  
S2654  
S2338  
S2405  
S2410  
S2380  
S2800  
S2734  
S2365  
S2350  
S2812  
S2650  
S2767  
S2392  
S2153  
S2549  
S2596  
S2521  
S2718  
S2373  
S2381  
S2667  
S2686  
S2247  
S2761  
S2508  
S2408  
S2379  
S2333  
S2510  
S2357  
S2406  
S2374  
S2216  
S2097  
S2189  
S2330  
S2668  
S2765  
S2320  
S2400  
S2391  
S2279

# NR4A3

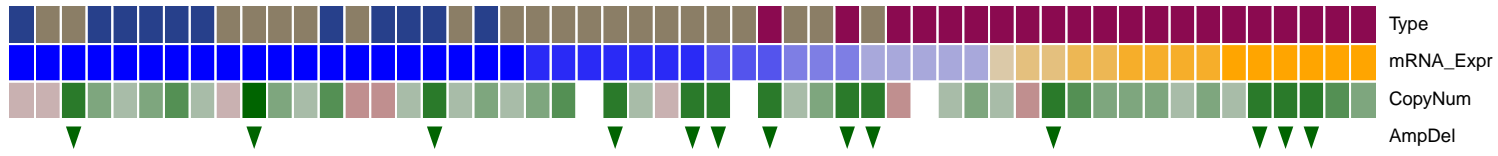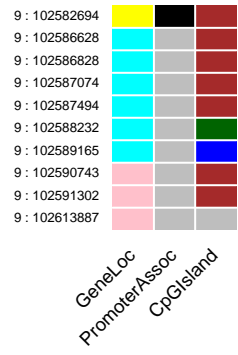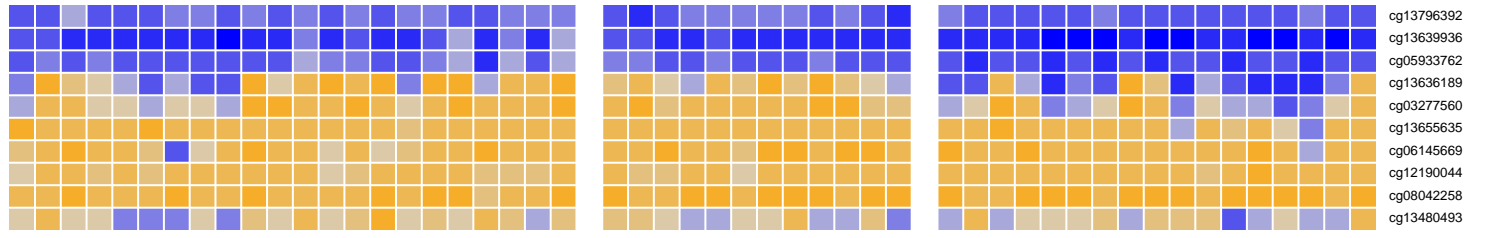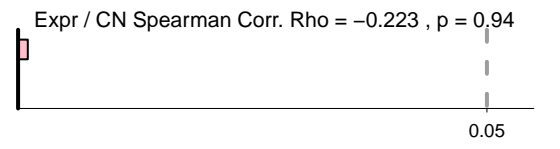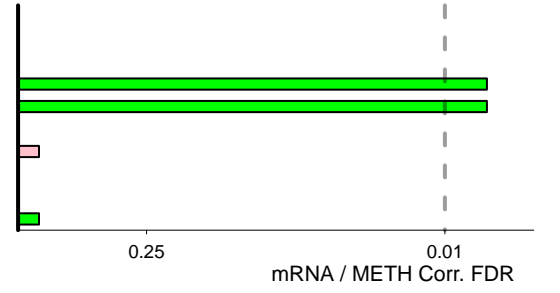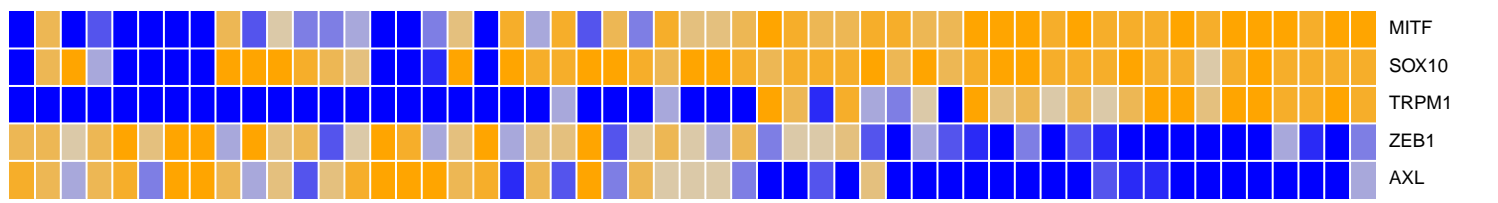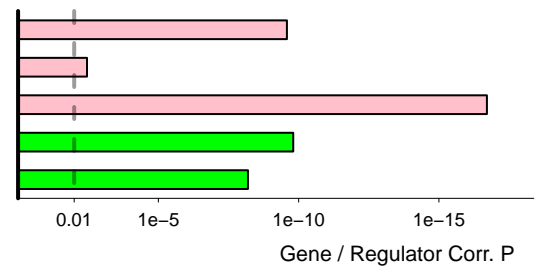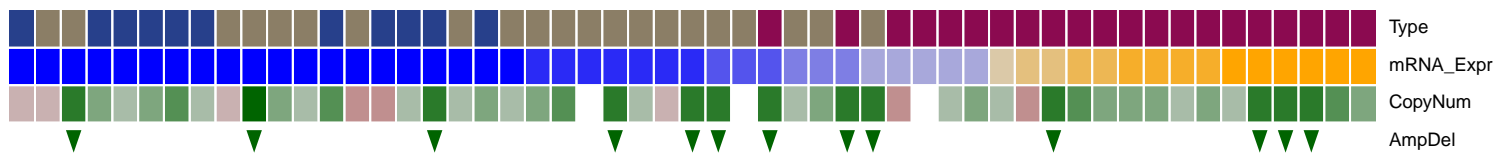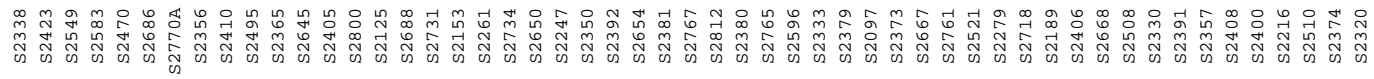

# DCT

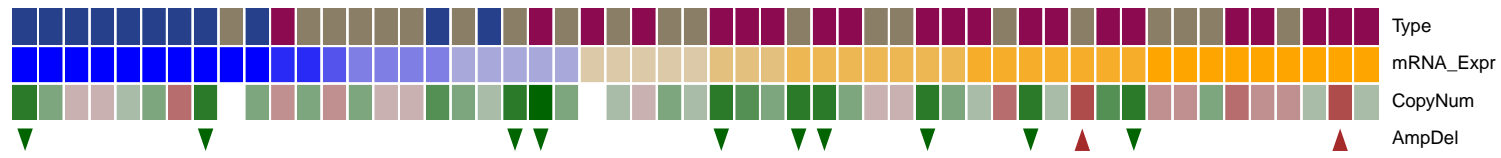

13 : 95133339  
 13 : 95132211  
 13 : 95131951  
 13 : 95131809  
 13 : 95116571

GeneLoc  
 PromoterAssoc  
 CpGIsland

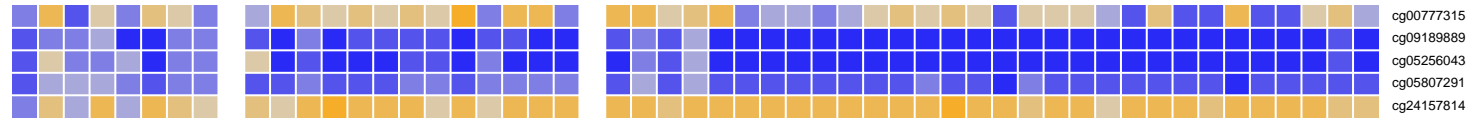

cg00777315  
 cg09189889  
 cg05256043  
 cg05807291  
 cg24157814

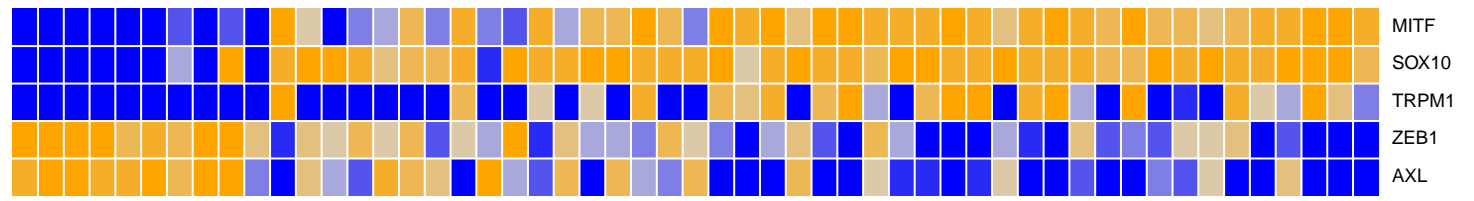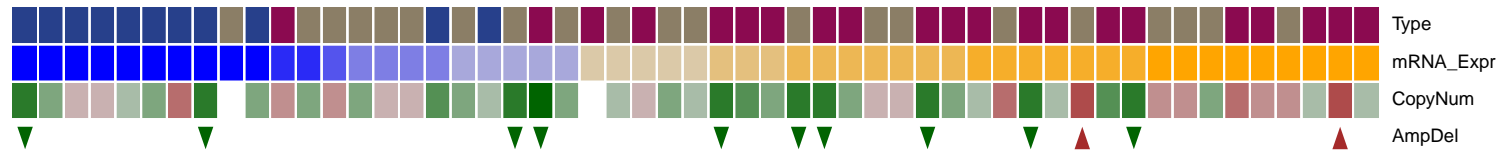

S2470  
 S2356  
 S2770A  
 S2261  
 S2338  
 S2688  
 S2583  
 S2125  
 S2350  
 S2686  
 S2521  
 S2365  
 S2549  
 S2645  
 S2800  
 S2423  
 S2405  
 S2596  
 S2731  
 S2495  
 S2668  
 S2650  
 S2667  
 S2410  
 S2320  
 S2380  
 S2654  
 S2718  
 S2357  
 S2216  
 S2153  
 S2406  
 S2408  
 S2381  
 S2734  
 S2508  
 S2391  
 S2330  
 S2812  
 S2510  
 S2374  
 S2247  
 S2761  
 S2765  
 S2392  
 S2333  
 S2767  
 S2379  
 S2189  
 S2097  
 S2400  
 S2279  
 S2373

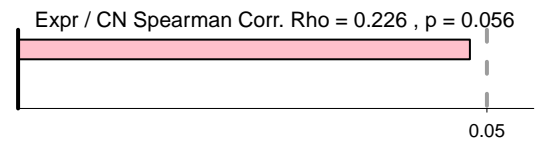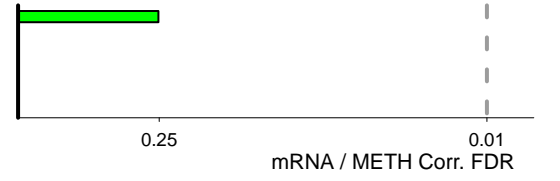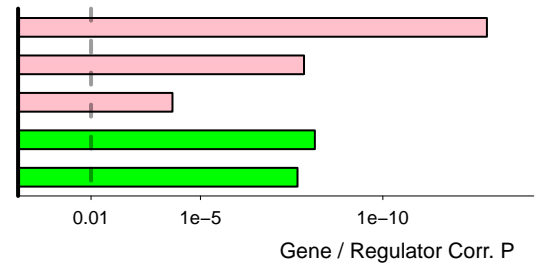

# SLC45A2

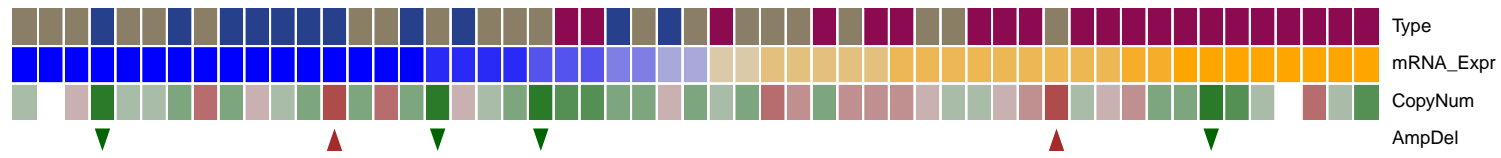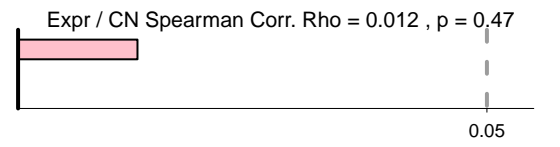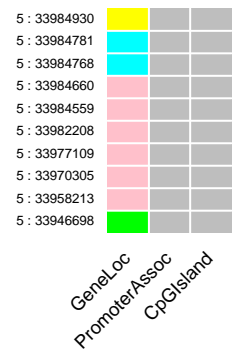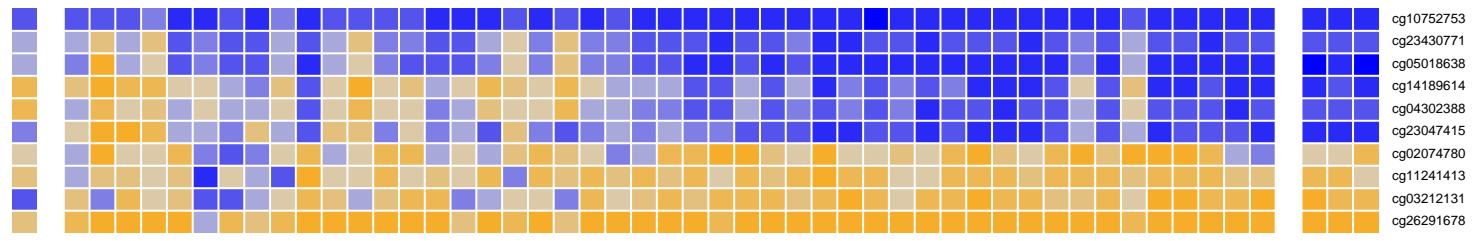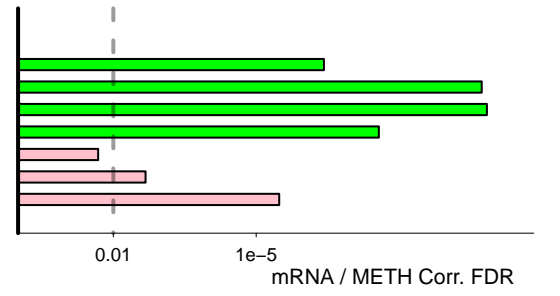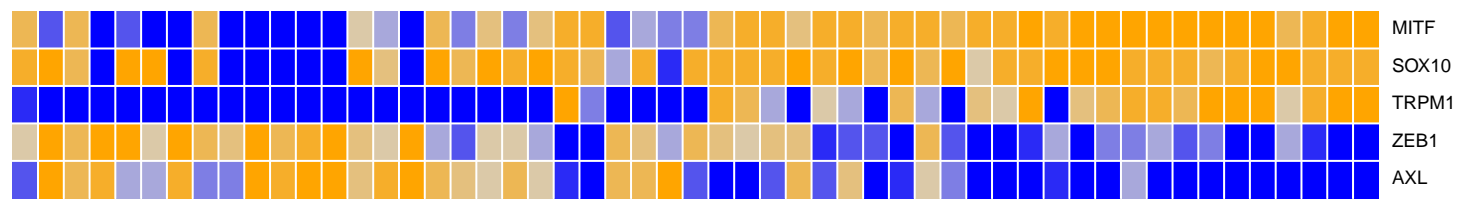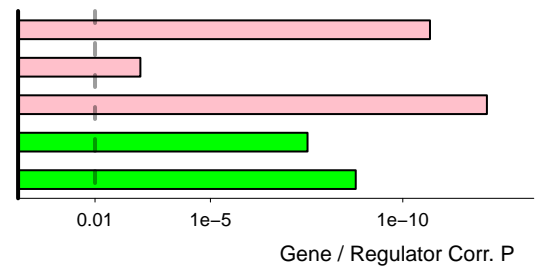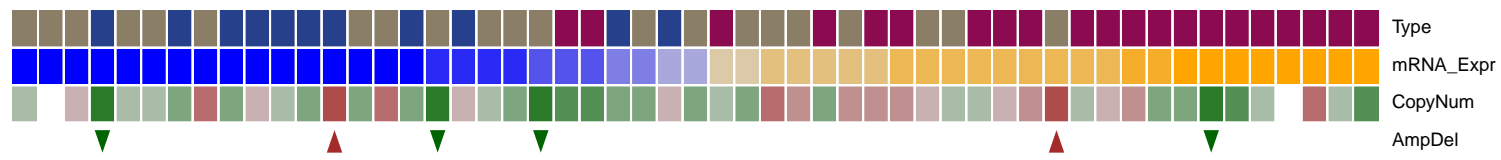

S2333  
S2350  
S2423  
S2470  
S2495  
S2549  
S2261  
S2380  
S2686  
S2770A  
S2338  
S2688  
S2125  
S2365  
S2800  
S2356  
S2410  
S2405  
S2767  
S2654  
S2812  
S2330  
S2373  
S2583  
S2650  
S2731  
S2645  
S2379  
S2596  
S2247  
S2153  
S2668  
S2097  
S2761  
S2508  
S2381  
S2392  
S2357  
S2189  
S2521  
S2734  
S2279  
S2718  
S2320  
S2216  
S2406  
S2765  
S2391  
S2400  
S2667  
S2510  
S2408  
S2374

# PLP1

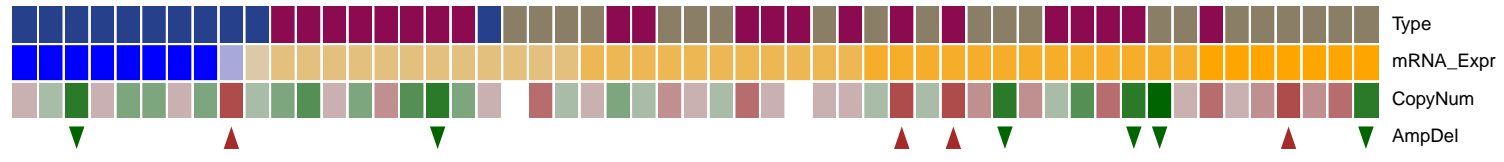

X : 103029964  
 X : 103030149  
 X : 103030593  
 X : 103030978  
 X : 103031374  
 X : 103031450  
 X : 103031565  
 X : 103031822  
 X : 103032137  
 X : 103035890  
 X : 103046141

GeneLoc  
 PromoterAssoc  
 CpGIsland

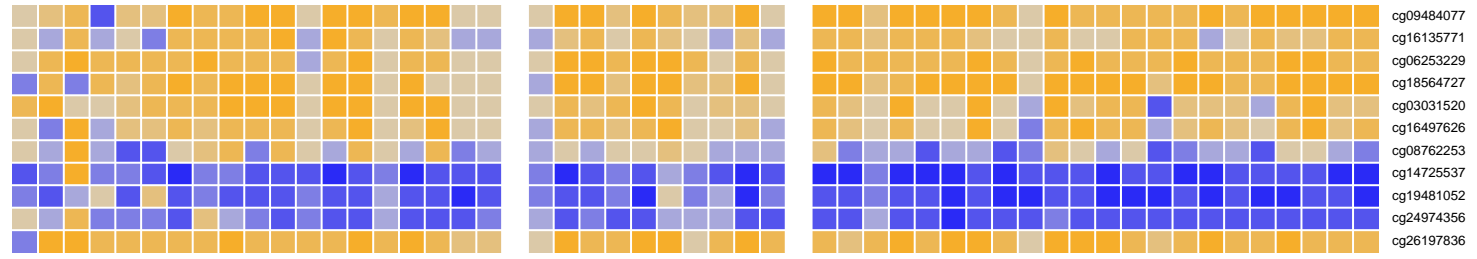

cg09484077  
 cg16135771  
 cg06253229  
 cg18564727  
 cg03031520  
 cg16497626  
 cg08762253  
 cg14725537  
 cg19481052  
 cg24974356  
 cg26197836

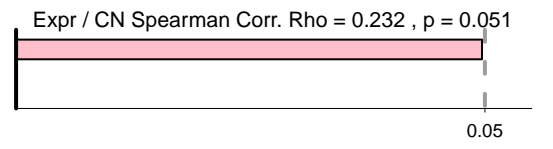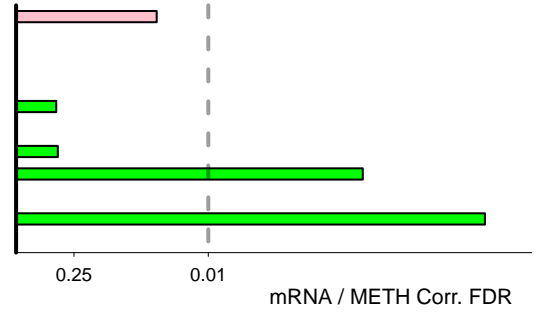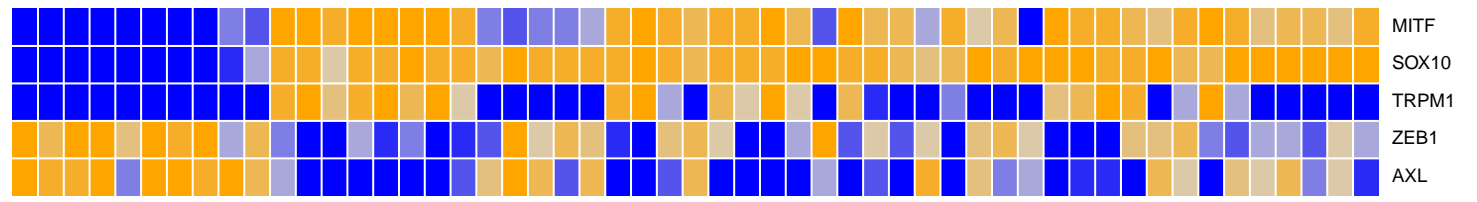

MITF  
 SOX10  
 TRPM1  
 ZEB1  
 AXL

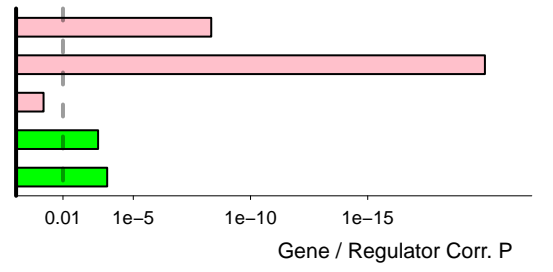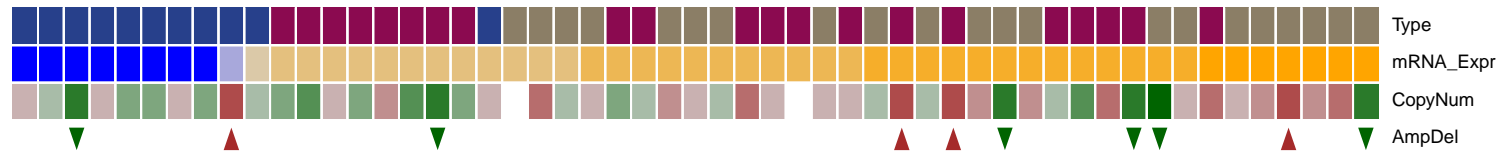

S2770A  
 S2338  
 S2470  
 S2125  
 S2686  
 S2356  
 S2688  
 S2261  
 S2731  
 S2583  
 S2320  
 S2374  
 S2357  
 S2216  
 S2521  
 S2718  
 S2408  
 S2668  
 S2405  
 S2350  
 S2654  
 S2645  
 S2650  
 S2510  
 S2400  
 S2247  
 S2423  
 S2596  
 S2189  
 S2391  
 S2667  
 S2495  
 S2406  
 S2333  
 S2761  
 S2800  
 S2373  
 S2365  
 S2380  
 S2549  
 S2279  
 S2508  
 S2330  
 S2379  
 S2153  
 S2381  
 S2765  
 S2097  
 S2812  
 S2410  
 S2392  
 S2767  
 S2734

# PLEKHH1

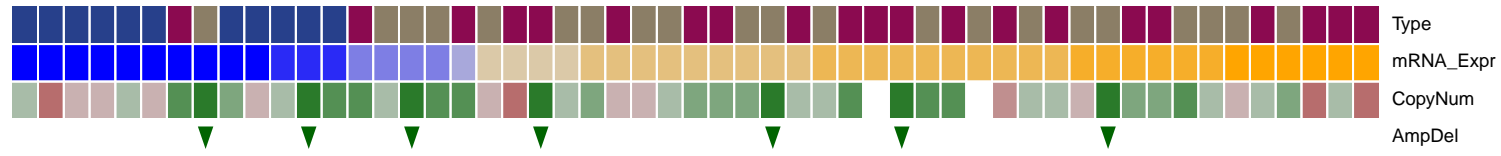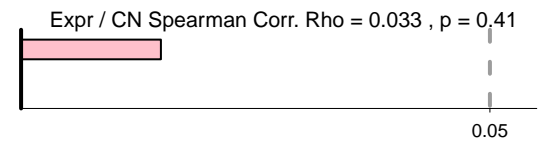

14 : 67999390  
 14 : 67999431  
 14 : 68000381  
 14 : 68000922  
 14 : 68002903  
 14 : 68008964  
 14 : 68023941  
 14 : 68036318  
 14 : 68037077  
 14 : 68038121  
 14 : 68038799  
 14 : 68038877  
 14 : 68040530  
 14 : 68042281

GeneLoc  
 PromoterAssoc  
 CpGIsland

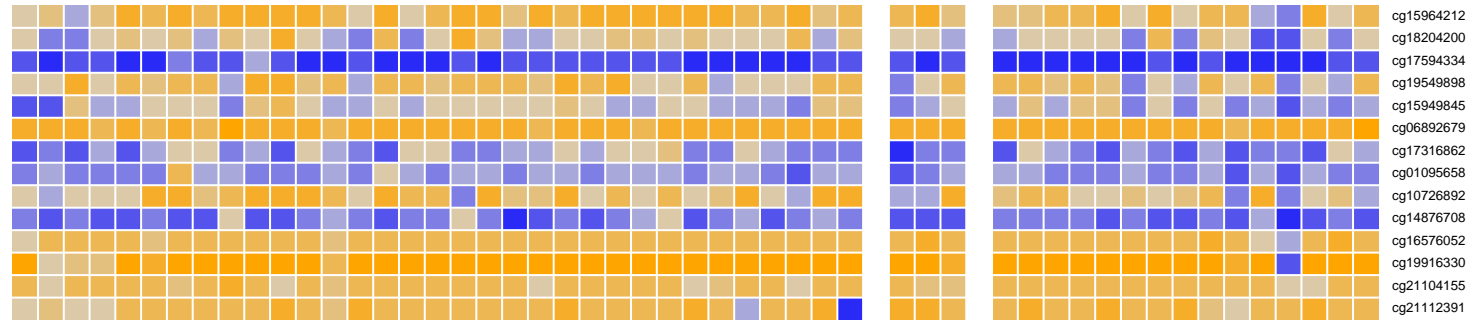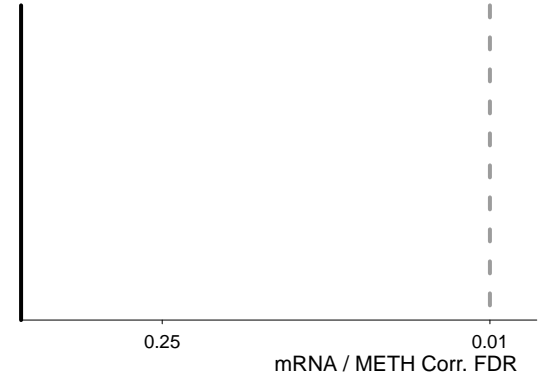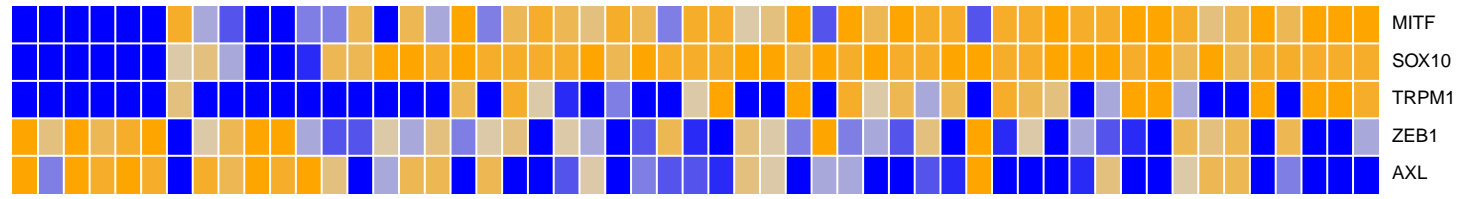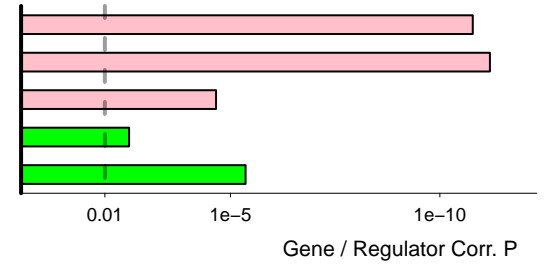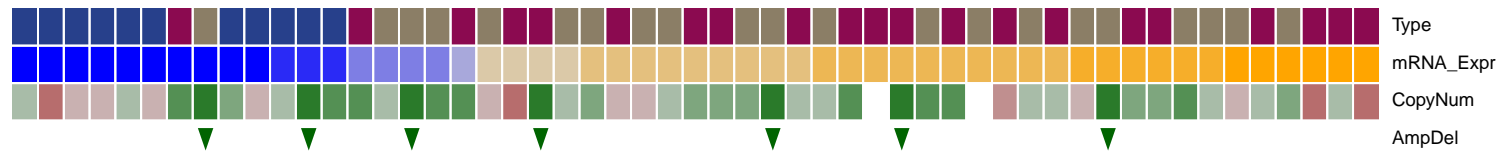

S2356  
 S2686  
 S2125  
 S2338  
 S2688  
 S2261  
 S2357  
 S2800  
 S2583  
 S2770A  
 S2470  
 S2731  
 S2405  
 S2761  
 S2549  
 S2410  
 S2650  
 S2718  
 S2654  
 S2379  
 S2189  
 S2333  
 S2812  
 S2373  
 S2392  
 S2645  
 S2668  
 S2330  
 S2365  
 S2767  
 S2765  
 S2495  
 S2320  
 S2667  
 S2406  
 S2247  
 S2508  
 S2350  
 S2510  
 S2596  
 S2279  
 S2734  
 S2097  
 S2521  
 S2400  
 S2381  
 S2153  
 S2423  
 S2408  
 S2380  
 S2374  
 S2391  
 S2216

Type  
 mRNA\_Expr  
 CopyNum  
 AmpDel



# ASAH1

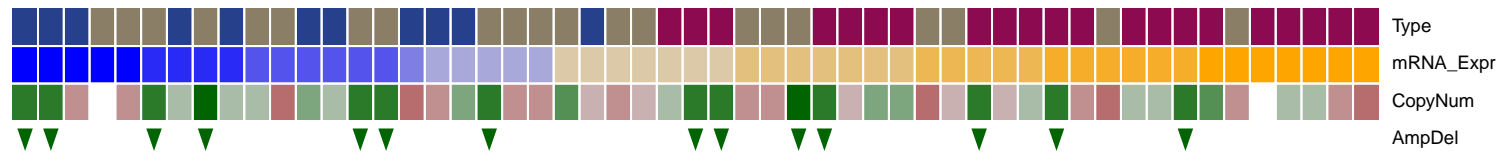

8 : 17943990  
 8 : 17943293  
 8 : 17942993  
 8 : 17940228  
 8 : 17937731

GeneLoc  
 PromoterAssoc  
 CpGIsland

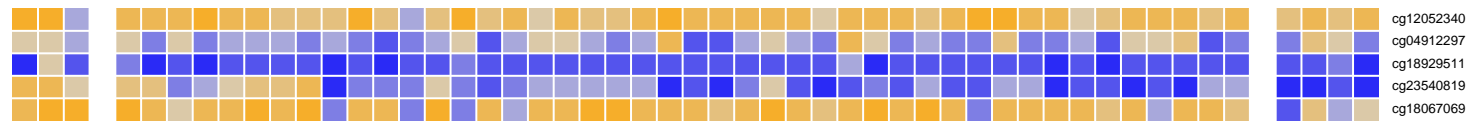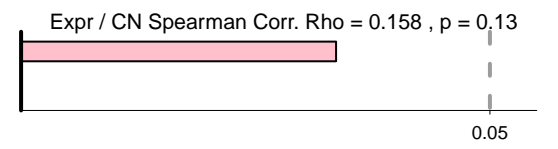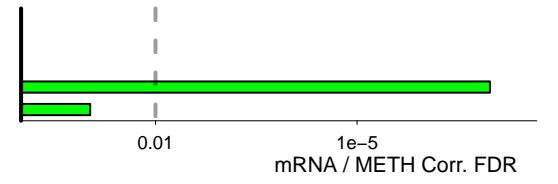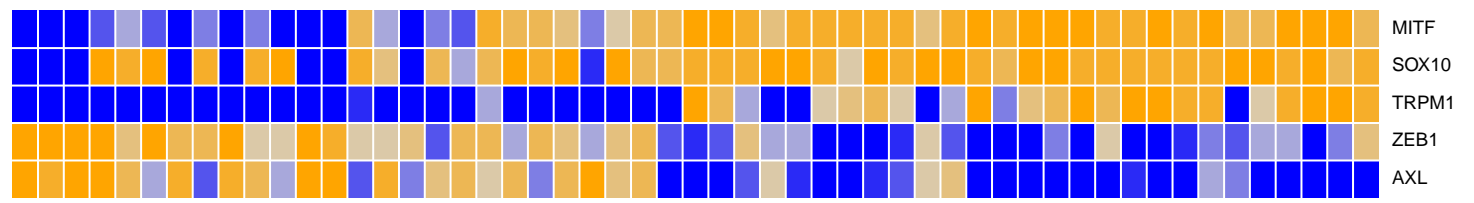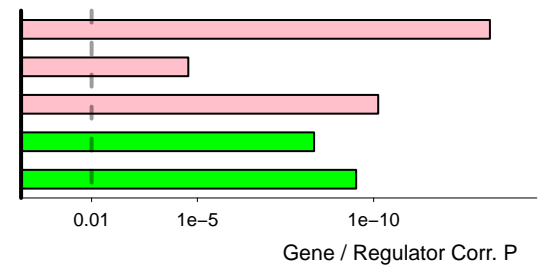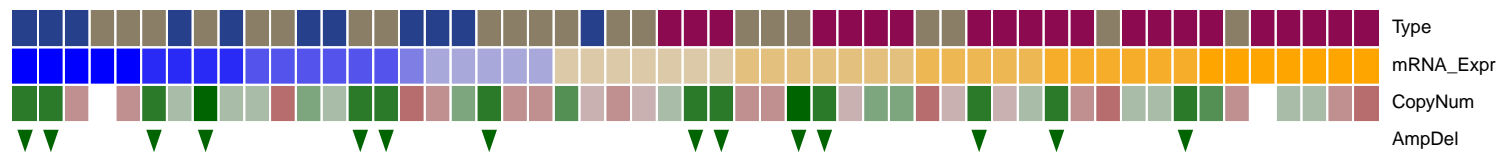

S2770A  
 S2470  
 S2125  
 S2350  
 S2650  
 S2495  
 S2338  
 S2645  
 S2261  
 S2654  
 S2549  
 S2356  
 S2688  
 S2333  
 S2800  
 S2686  
 S2405  
 S2583  
 S2381  
 S2410  
 S2380  
 S2153  
 S2731  
 S2365  
 S2423  
 S2761  
 S2521  
 S2406  
 S2247  
 S2812  
 S2734  
 S2189  
 S2357  
 S2508  
 S2668  
 S2767  
 S2097  
 S2391  
 S2373  
 S2279  
 S2718  
 S2374  
 S2596  
 S2330  
 S2408  
 S2510  
 S2320  
 S2392  
 S2667  
 S2216  
 S2400  
 S2765  
 S2379

# SLC19A2

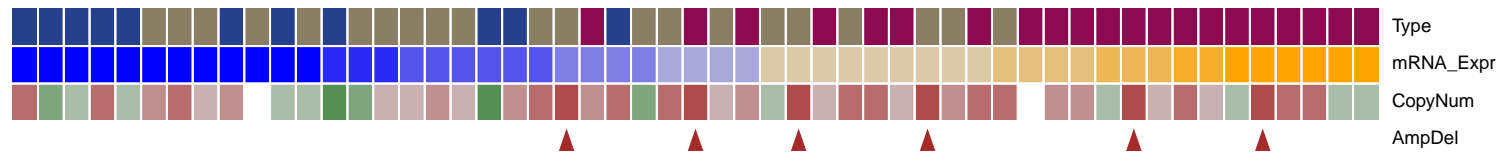

1: 169453550  
 1: 169452126  
 1: 169433715

GeneLoc  
 PromoterAssoc  
 CpGIsland

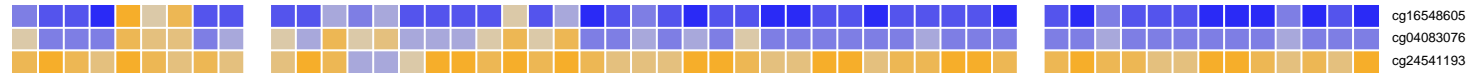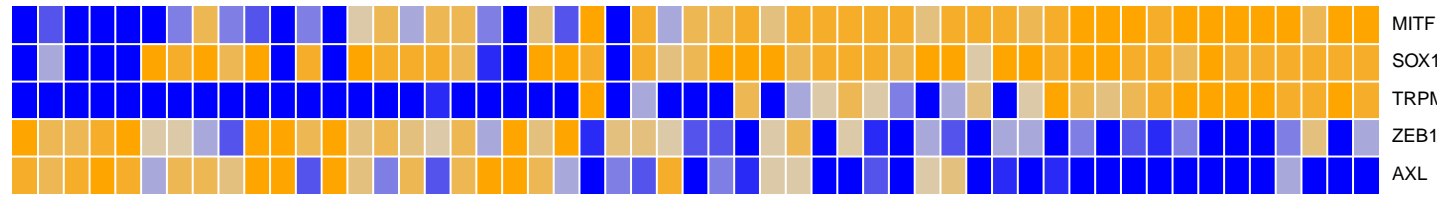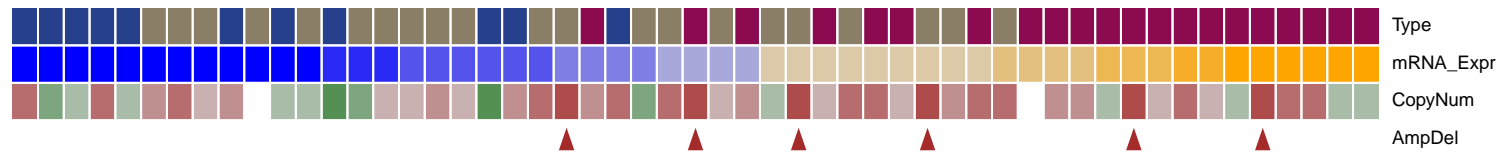

S2261  
 S2583  
 S2338  
 S2688  
 S2470  
 S2549  
 S2654  
 S2410  
 S2405  
 S2350  
 S2356  
 S2645  
 S2770A  
 S2365  
 S2380  
 S2650  
 S2333  
 S2423  
 S2731  
 S2125  
 S2153  
 S2495  
 S2521  
 S2686  
 S2247  
 S2800  
 S2761  
 S2392  
 S2508  
 S2767  
 S2381  
 S2189  
 S2596  
 S2668  
 S2373  
 S2812  
 S2097  
 S2357  
 S2734  
 S2667  
 S2330  
 S2718  
 S2279  
 S2406  
 S2510  
 S2765  
 S2400  
 S2408  
 S2374  
 S2320  
 S2379  
 S2391  
 S2216

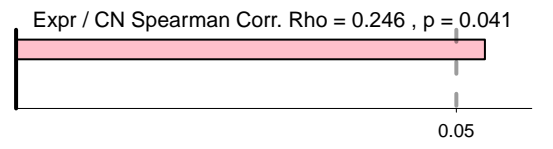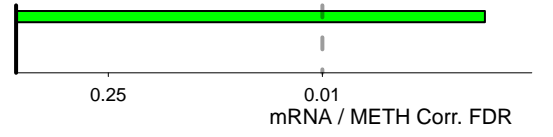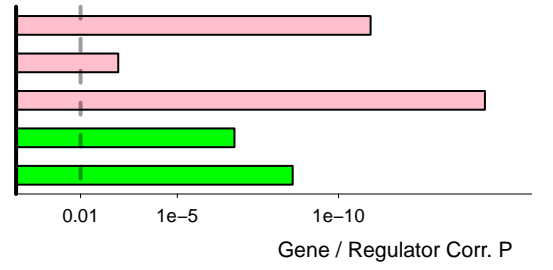

# LONRF1

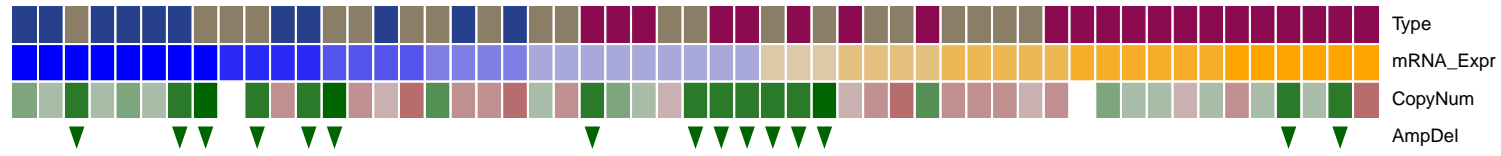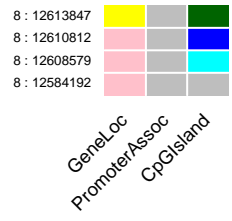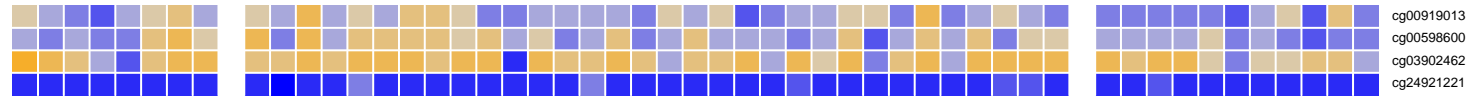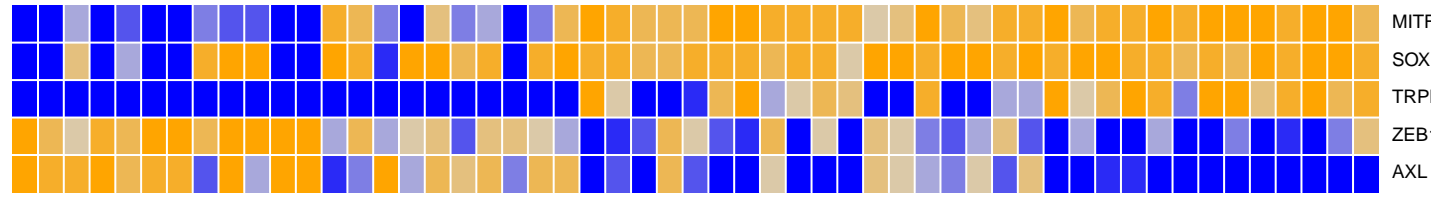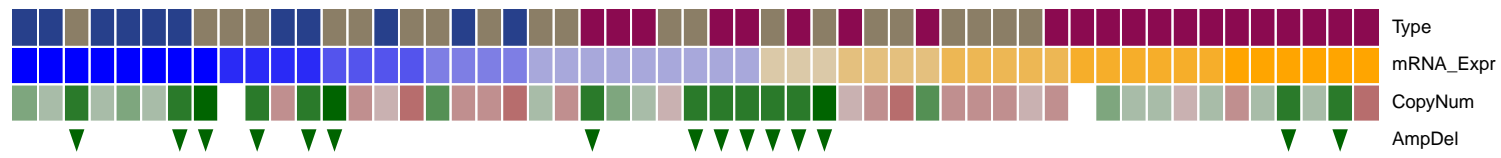

- S2356
- S2338
- S2800
- S2688
- S2583
- S2261
- S2470
- S2645
- S2350
- S2495
- S2125
- S2770A
- S2734
- S2380
- S2731
- S2549
- S2153
- S2405
- S2650
- S2686
- S2654
- S2410
- S2391
- S2668
- S2761
- S2423
- S2333
- S2406
- S2521
- S2381
- S2189
- S2596
- S2357
- S2365
- S2767
- S2320
- S2392
- S2812
- S2247
- S2097
- S2374
- S2667
- S2508
- S2330
- S2216
- S2373
- S2408
- S2765
- S2279
- S2510
- S2400
- S2718
- S2379

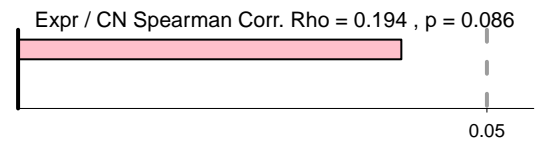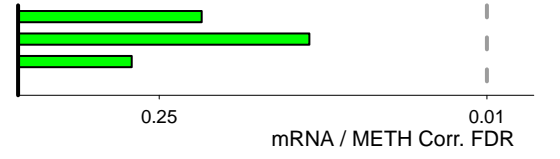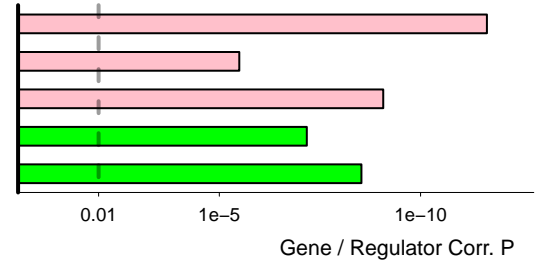

# ZFYVE16

5 : 79703067  
 5 : 79707092  
 5 : 79762963

GeneLoc  
 PromoterAssoc  
 CpGIsland

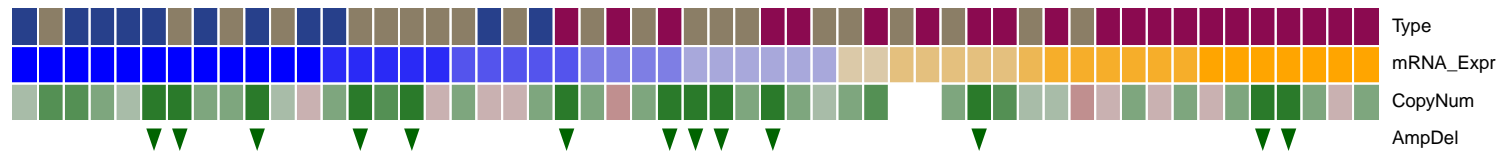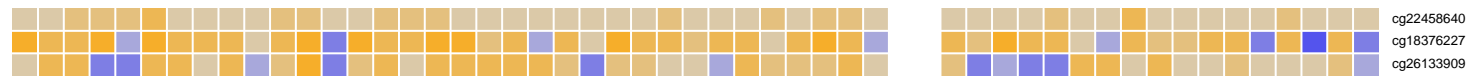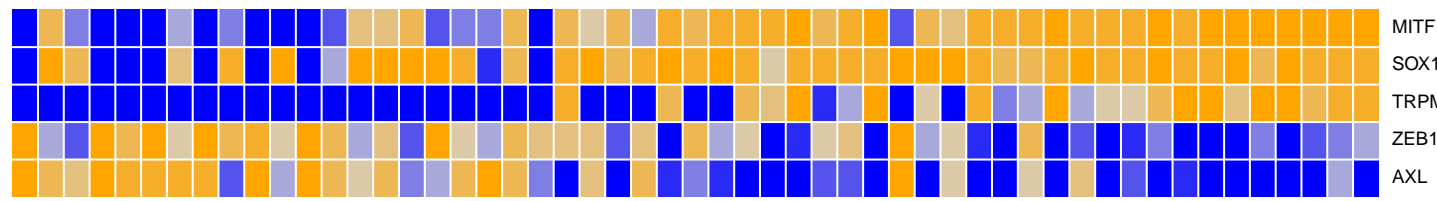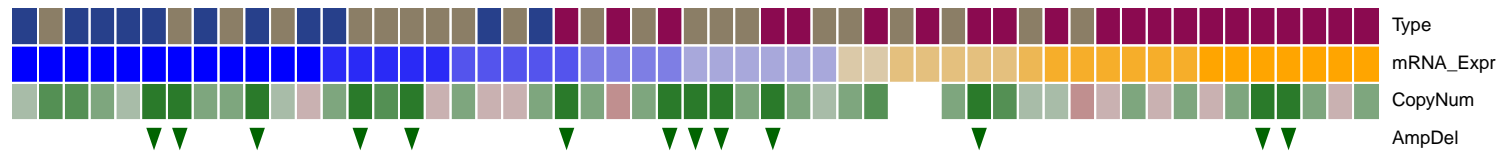

S2125  
 S2410  
 S2405  
 S2356  
 S2338  
 S2470  
 S2800  
 S2261  
 S2645  
 S2688  
 S2549  
 S2770A  
 S2583  
 S2812  
 S2153  
 S2392  
 S2495  
 S2654  
 S2731  
 S2423  
 S2686  
 S2379  
 S2365  
 S2761  
 S2650  
 S2508  
 S2380  
 S2734  
 S2596  
 S2357  
 S2521  
 S2333  
 S2247  
 S2391  
 S2350  
 S2667  
 S2767  
 S2510  
 S2373  
 S2381  
 S2408  
 S2097  
 S2189  
 S2668  
 S2718  
 S2330  
 S2374  
 S2279  
 S2765  
 S2400  
 S2406  
 S2320  
 S2216

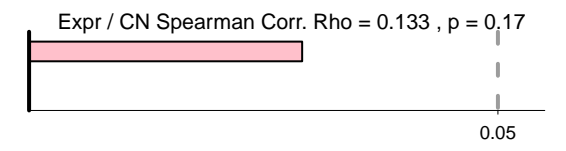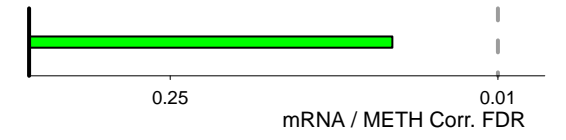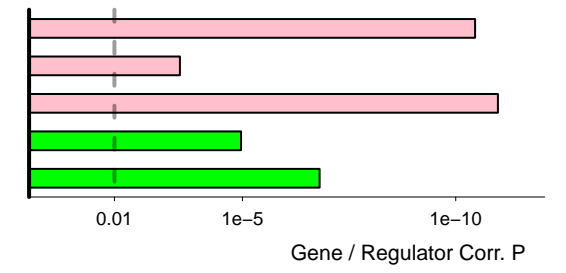

# GALNT3

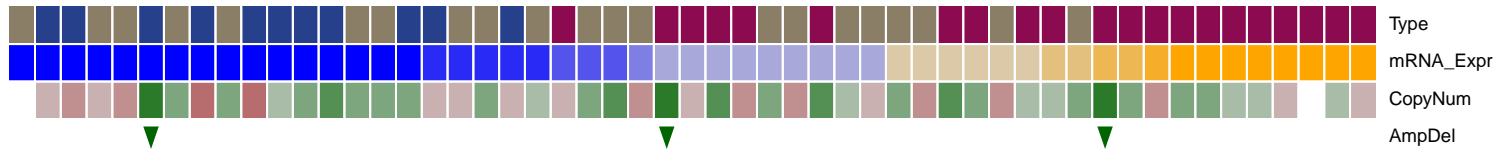

2:166651375  
2:166651320  
2:166651299  
2:166650965  
2:166650947  
2:166650933  
2:166650930  
2:166650882  
2:166650805  
2:166650769  
2:166650699  
2:166650606  
2:166649910  
2:166634454  
2:166626783

GeneLoc  
PromoterAssoc  
CpGIsland

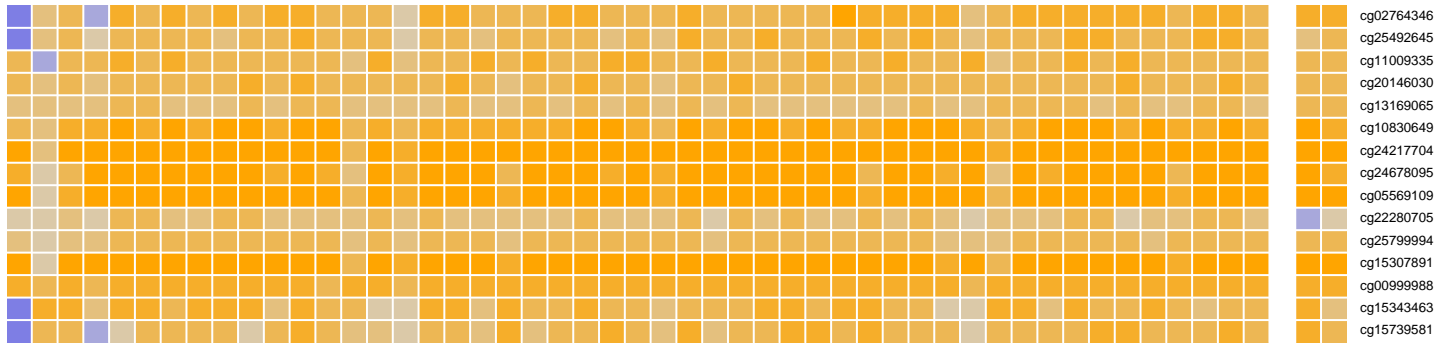

cg02764346  
cg25492645  
cg11009335  
cg20146030  
cg13169065  
cg10830649  
cg24217704  
cg24678095  
cg05569109  
cg22280705  
cg25799994  
cg15307891  
cg00999988  
cg15343463  
cg15739581

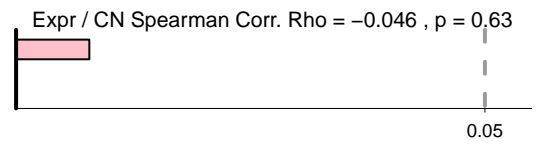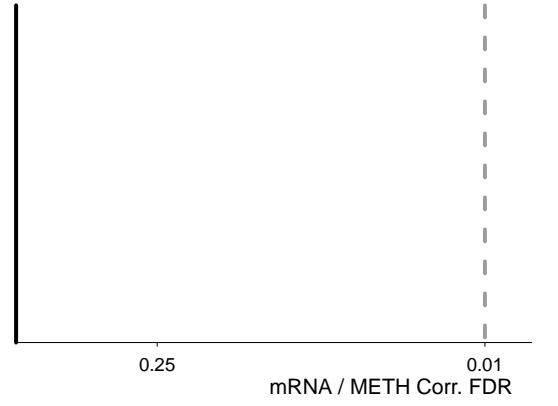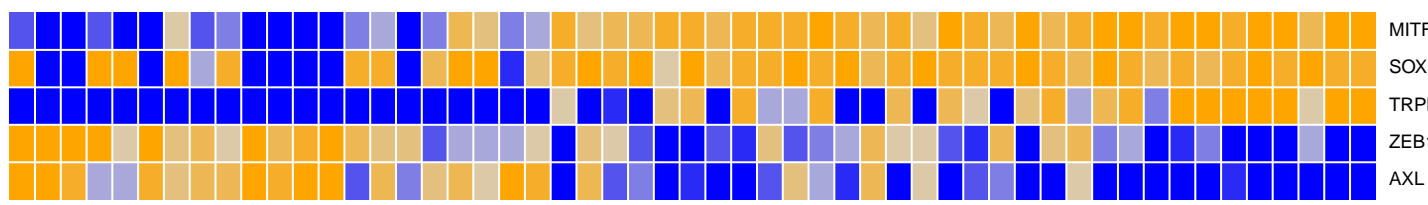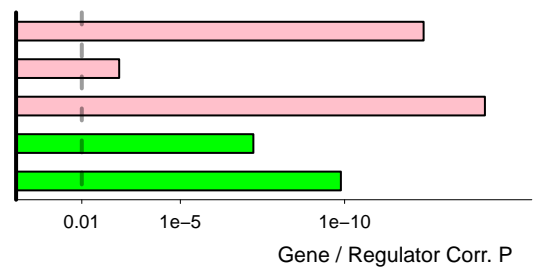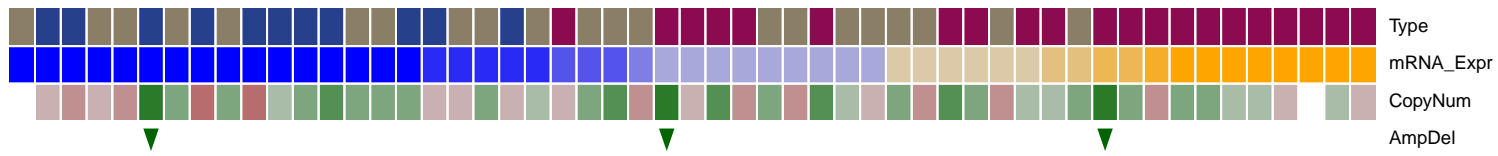

S2350  
S2770A  
S2261  
S2495  
S2549  
S2470  
S2365  
S2583  
S2654  
S2356  
S2338  
S2688  
S2125  
S2645  
S2650  
S2686  
S2405  
S2410  
S2812  
S2731  
S2800  
S2189  
S2153  
S2333  
S2392  
S2357  
S2508  
S2761  
S2510  
S2247  
S2097  
S2320  
S2734  
S2423  
S2596  
S2767  
S2406  
S2668  
S2380  
S2279  
S2379  
S2381  
S2718  
S2216  
S2373  
S2521  
S2765  
S2330  
S2400  
S2374  
S2667  
S2408  
S2391

# APOE

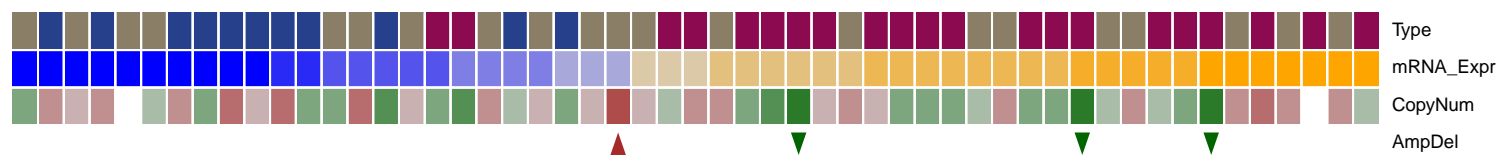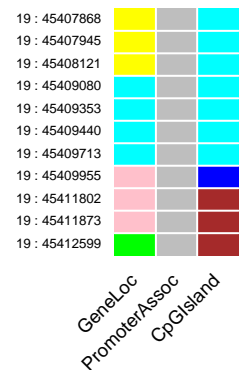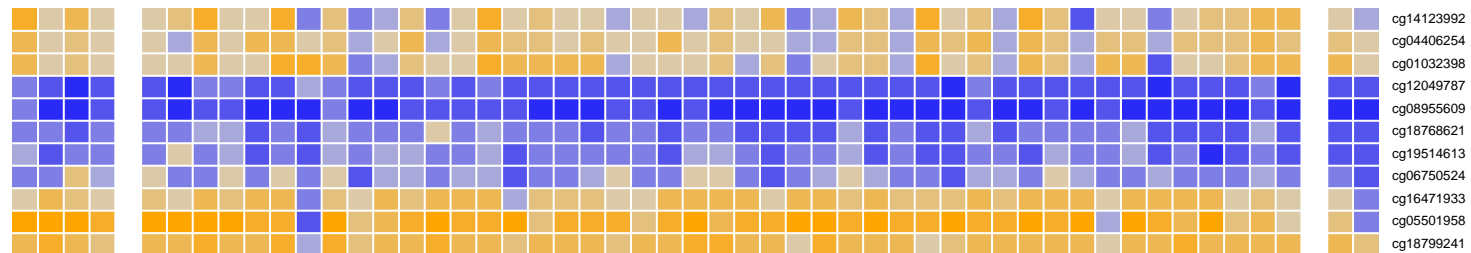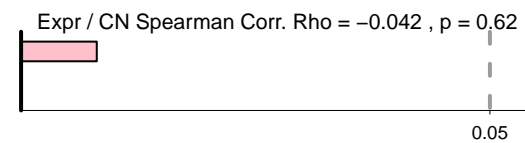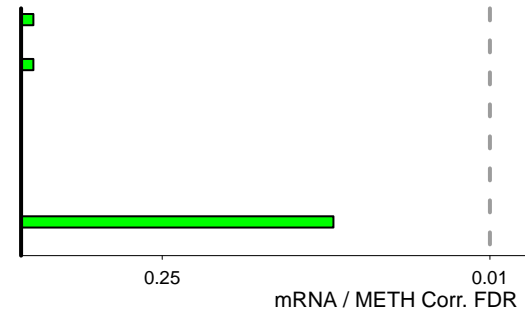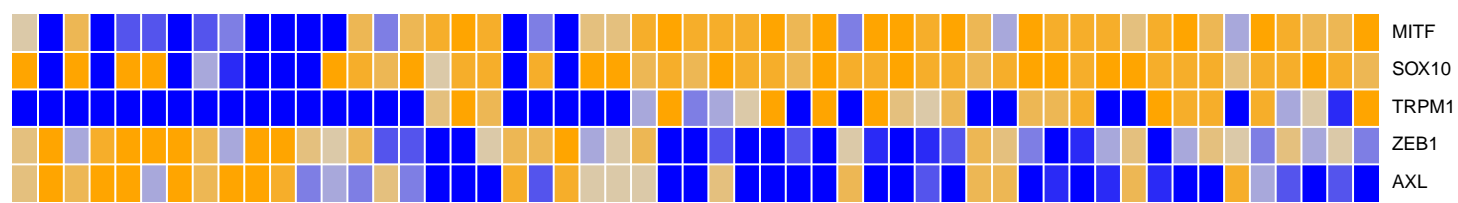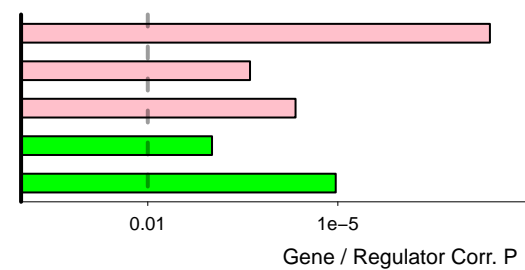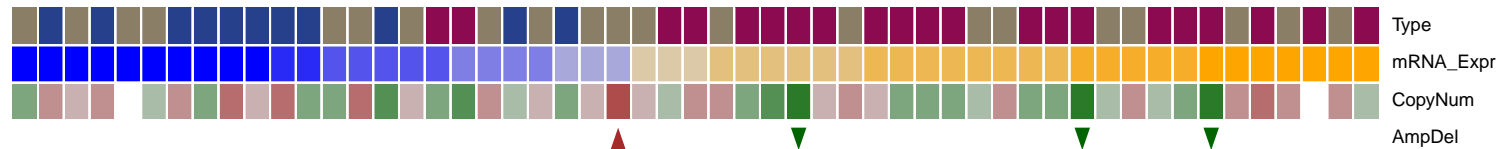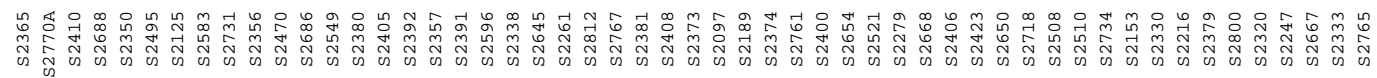

# IL6R

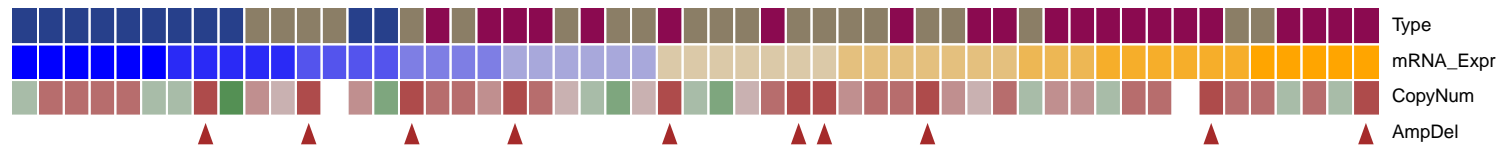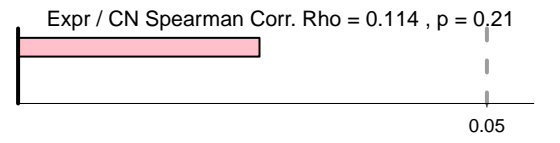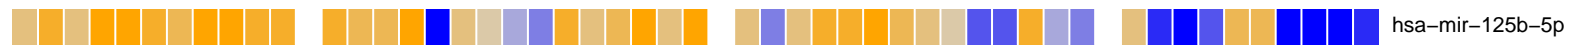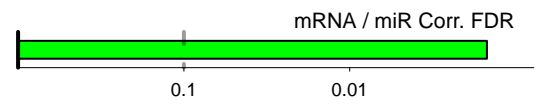

1: 154377091  
1: 154377364  
1: 154377379  
1: 154377403  
1: 154377429  
1: 154377532  
1: 154377621  
1: 154379696  
1: 154380179  
1: 154380705  
1: 154392070  
1: 154402922  
1: 154415062  
1: 154435948  
1: 154438143  
1: 154439516

GeneLoc  
PromoterAssoc  
CpGIsland

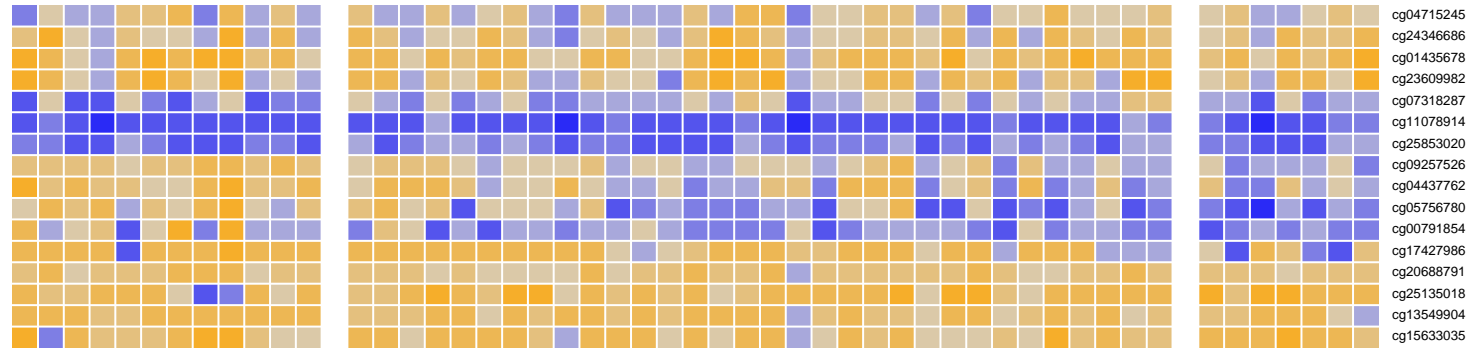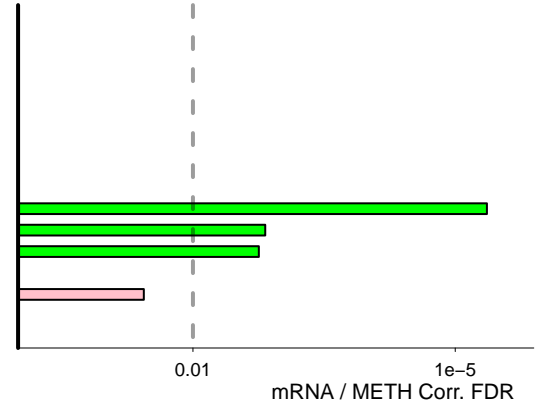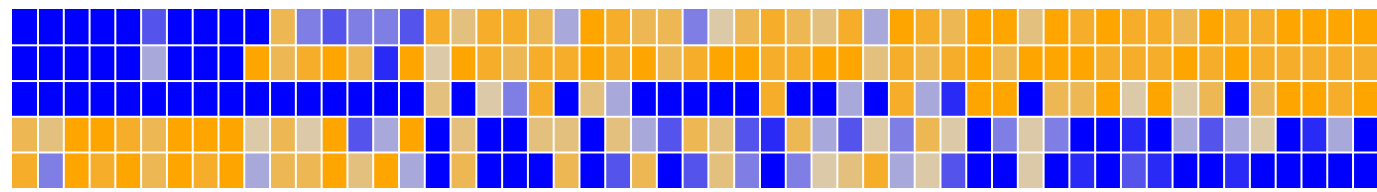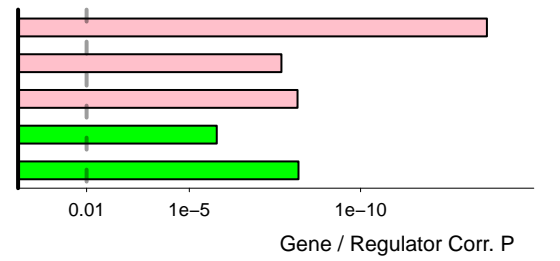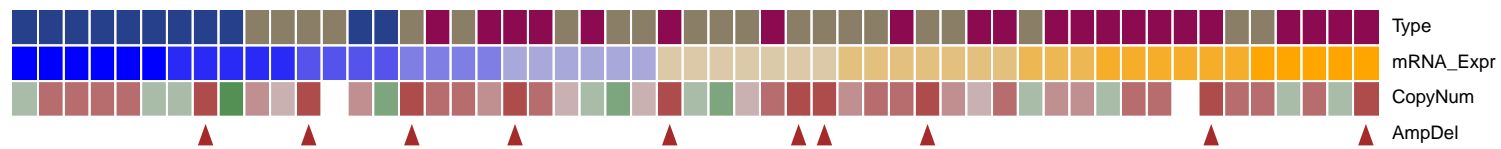

S2338  
S2686  
S2125  
S2261  
S2688  
S2583  
S2356  
S2470  
S2770A  
S2549  
S2423  
S2654  
S2350  
S2405  
S2731  
S2495  
S2357  
S2153  
S2189  
S2373  
S2379  
S2650  
S2279  
S2247  
S2410  
S2761  
S2645  
S2365  
S2392  
S2510  
S2380  
S2812  
S2097  
S2800  
S2320  
S2381  
S2333  
S2400  
S2765  
S2767  
S2718  
S2508  
S2391  
S2668  
S2330  
S2667  
S2406  
S2734  
S2596  
S2408  
S2521  
S2216  
S2374

# HES6

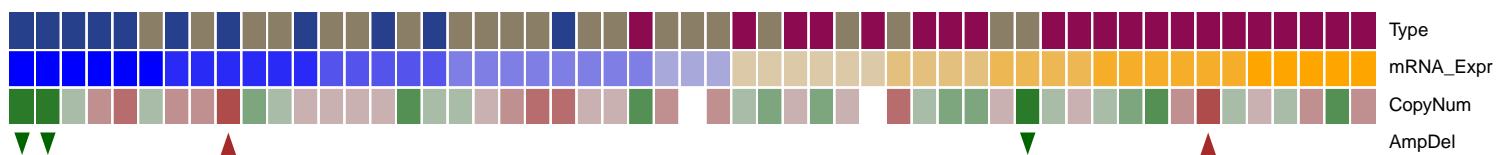

2 : 239149937  
 2 : 239149859  
 2 : 239149142  
 2 : 239148132  
 2 : 239147605  
 2 : 239147445

GeneLoc  
 PromoterAssoc  
 CpGIsland

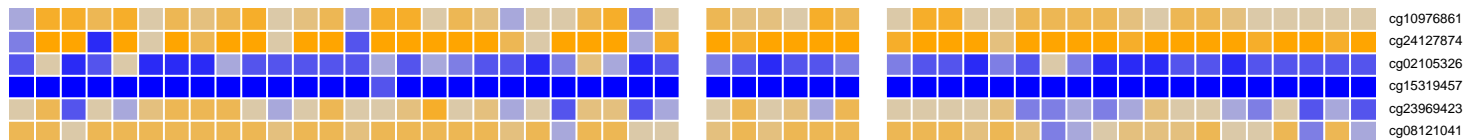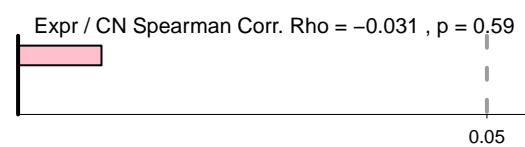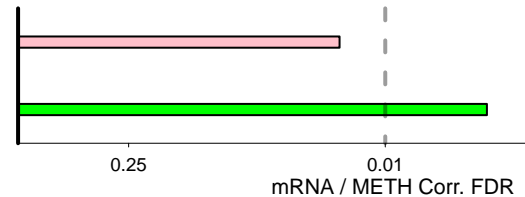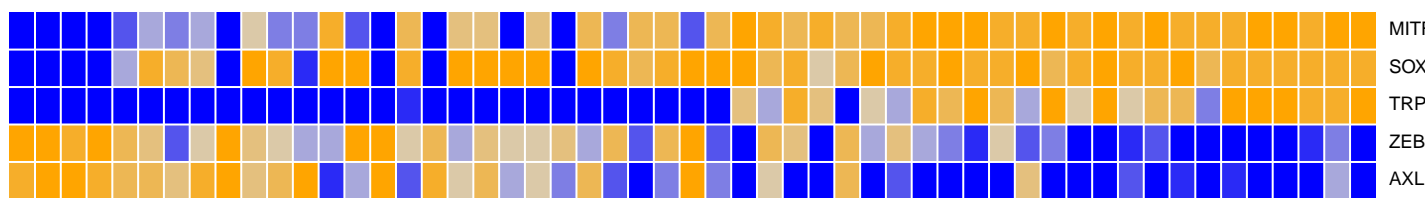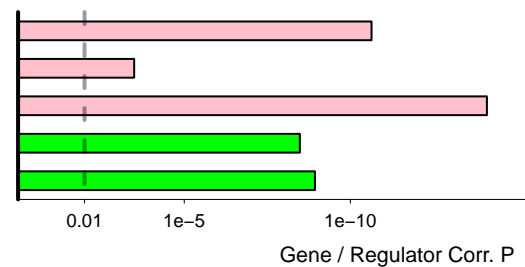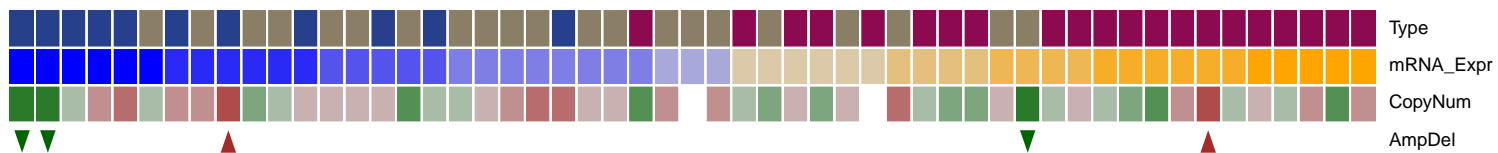

S2261  
 S2125  
 S2688  
 S2470  
 S2583  
 S2650  
 S2405  
 S2800  
 S2356  
 S2365  
 S2654  
 S2731  
 S2734  
 S2495  
 S2770A  
 S2333  
 S2338  
 S2812  
 S2153  
 S2549  
 S2767  
 S2686  
 S2410  
 S2645  
 S2761  
 S2380  
 S2350  
 S2392  
 S2279  
 S2381  
 S2379  
 S2357  
 S2423  
 S2667  
 S2247  
 S2216  
 S2718  
 S2521  
 S2596  
 S2097  
 S2765  
 S2189  
 S2400  
 S2668  
 S2406  
 S2508  
 S2373  
 S2330  
 S2391  
 S2408  
 S2510  
 S2320  
 S2374



# HPS4

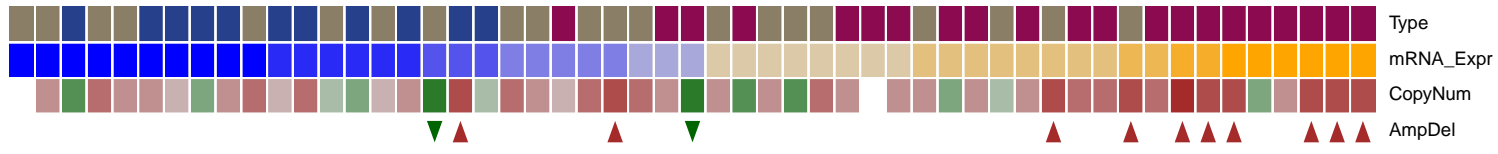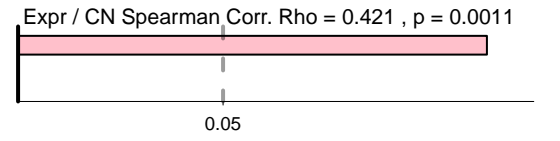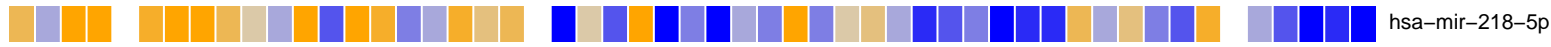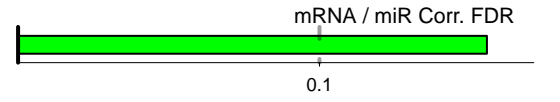

22 : 26881231  
 22 : 26881026  
 22 : 26877690  
 22 : 26876075  
 22 : 26875823  
 22 : 26875806  
 22 : 26875652  
 22 : 26875563  
 22 : 26875552  
 22 : 26875499  
 22 : 26857165

GeneLoc  
 PromoterAssoc  
 CpGIsland

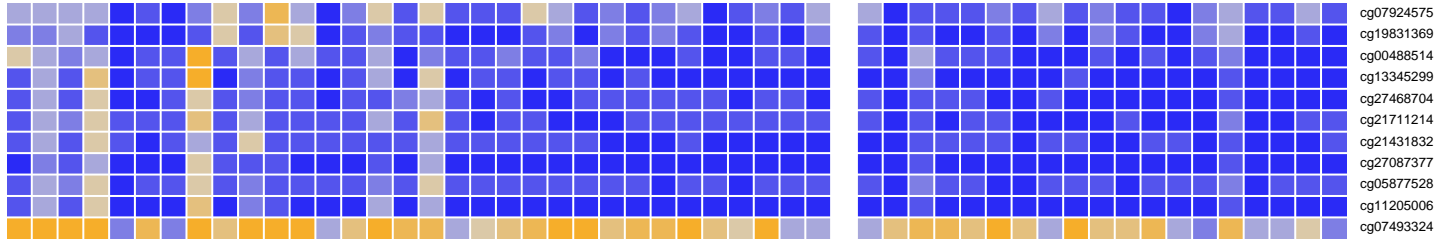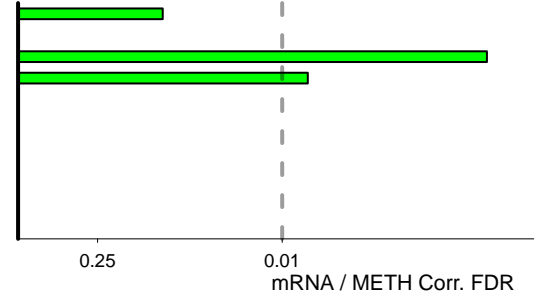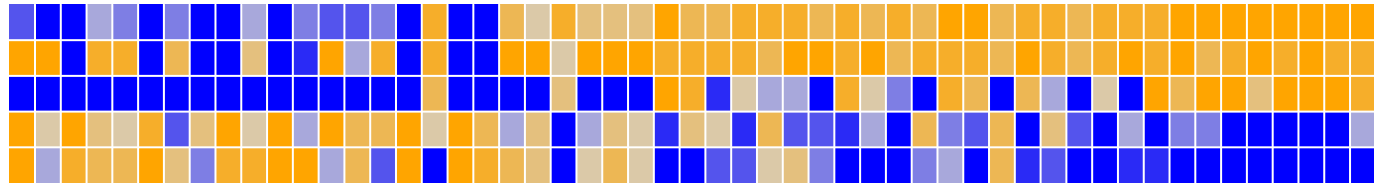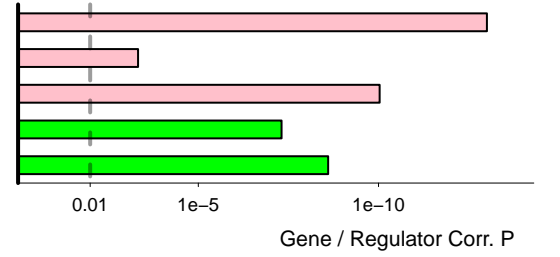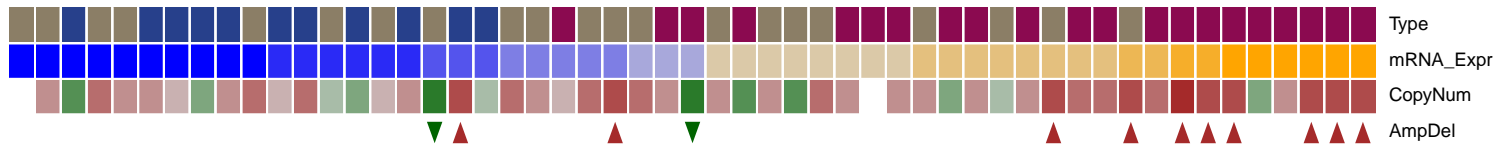

S2350  
 S2549  
 S2261  
 S2650  
 S2654  
 S2688  
 S2405  
 S2686  
 S2470  
 S2800  
 S2356  
 S2731  
 S2495  
 S2583  
 S2645  
 S2770A  
 S2596  
 S2125  
 S2338  
 S2410  
 S2365  
 S2357  
 S2812  
 S2153  
 S2767  
 S2521  
 S2379  
 S2333  
 S2668  
 S2381  
 S2097  
 S2392  
 S2510  
 S2667  
 S2373  
 S2380  
 S2320  
 S2406  
 S2423  
 S2508  
 S2247  
 S2761  
 S2189  
 S2734  
 S2330  
 S2718  
 S2765  
 S2391  
 S2279  
 S2374  
 S2400  
 S2408  
 S2216

# PHACTR1

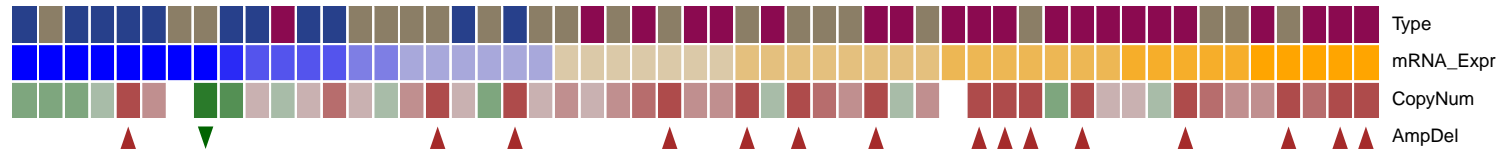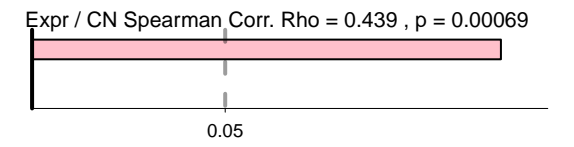

6 : 12716655  
6 : 12716671  
6 : 12717016  
6 : 12717138  
6 : 12717192  
6 : 12717776  
6 : 12717790  
6 : 12718370  
6 : 12718408  
6 : 12718530  
6 : 12729347  
6 : 12747208  
6 : 12748001  
6 : 12749352  
6 : 12749978  
6 : 12750030  
6 : 12750256  
6 : 12750392  
6 : 12752149  
6 : 12754496  
6 : 12789309  
6 : 12815710  
6 : 12827379  
6 : 12845743  
6 : 12851539  
6 : 12867139  
6 : 12881417  
6 : 12887210  
6 : 12910610  
6 : 12957651  
6 : 12957697  
6 : 12957800  
6 : 12957918  
6 : 12958080  
6 : 12993135  
6 : 13012998  
6 : 13013668  
6 : 13014053  
6 : 13014491  
6 : 13014871  
6 : 13015005  
6 : 13015106  
6 : 13015202  
6 : 13015221  
6 : 13114660  
6 : 13120250  
6 : 13134251  
6 : 13149336  
6 : 13173168  
6 : 13175441  
6 : 13192742  
6 : 13194027  
6 : 13248958  
6 : 13274151  
6 : 13274180  
6 : 13274284  
6 : 13274314  
6 : 13274354  
6 : 13287503

GeneLoc  
PromoterAssoc  
CpGIsland

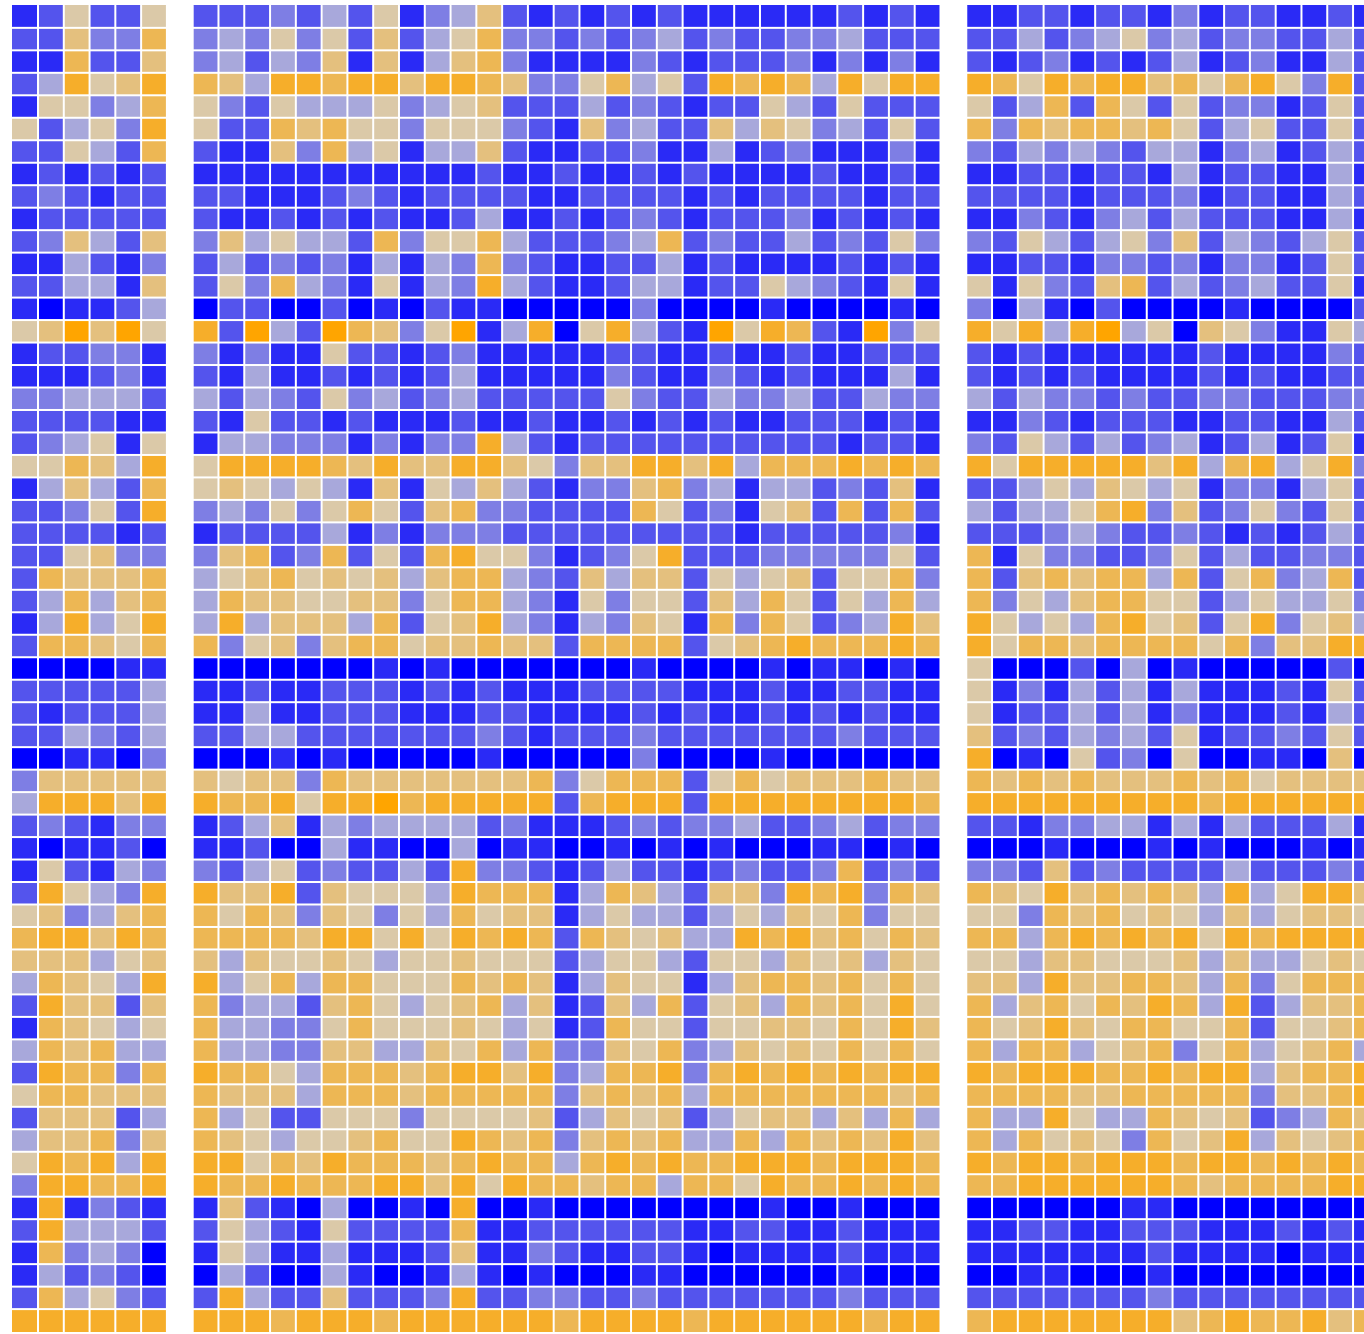

cg06874640  
cg12070069  
cg27584713  
cg12258607  
cg04985661  
cg14931071  
cg07279321  
cg09397542  
cg10129944  
cg17869960  
cg00168015  
cg17946266  
cg00846554  
cg20011562  
cg13246235  
cg13566648  
cg17336584  
cg04950301  
cg16207991  
cg03012452  
cg10481617  
cg04274883  
cg15542608  
cg05263760  
cg26302009  
cg25069772  
cg27365342  
cg20548013  
cg14773588  
cg09949366  
cg09400316  
cg19458485  
cg22370057  
cg08051310  
cg14619203  
cg02092785  
cg2337361  
cg16928323  
cg07466622  
cg09510202  
cg06769918  
cg03338924  
cg00501467  
cg03879823  
cg03565153  
cg03951877  
cg04631584  
cg10502136  
cg11615758  
cg13401235  
cg02220008  
cg11908041  
cg03891302  
cg06879394  
cg21538684  
cg20827128  
cg07912922  
cg00460589  
cg24996339

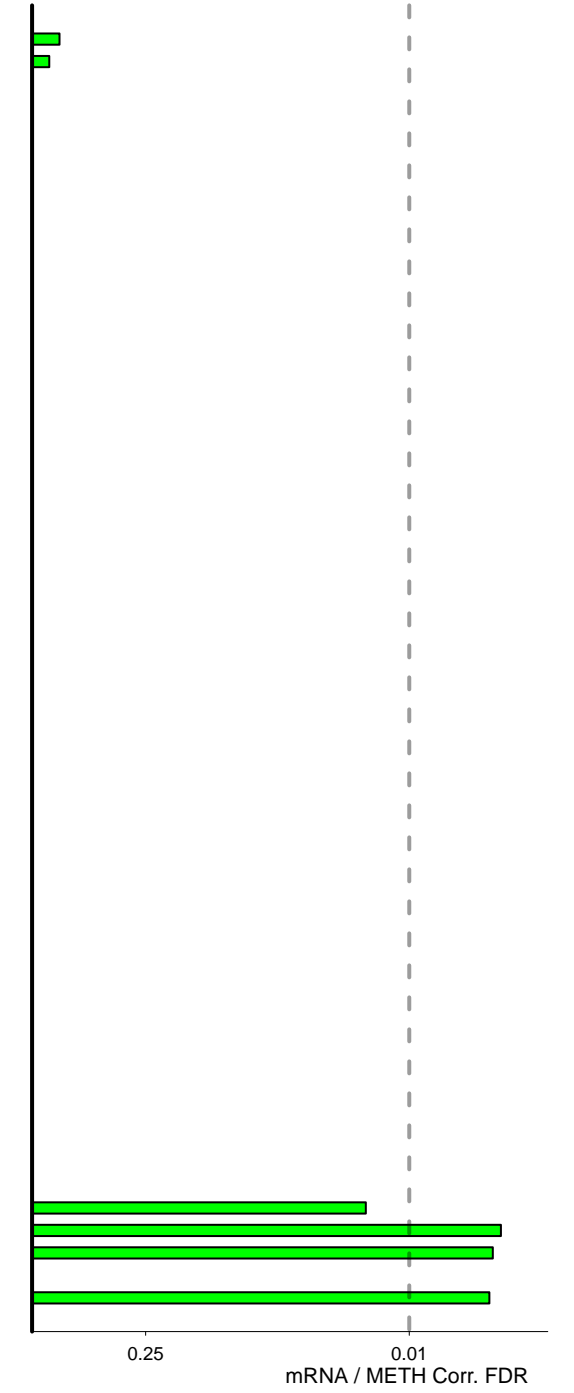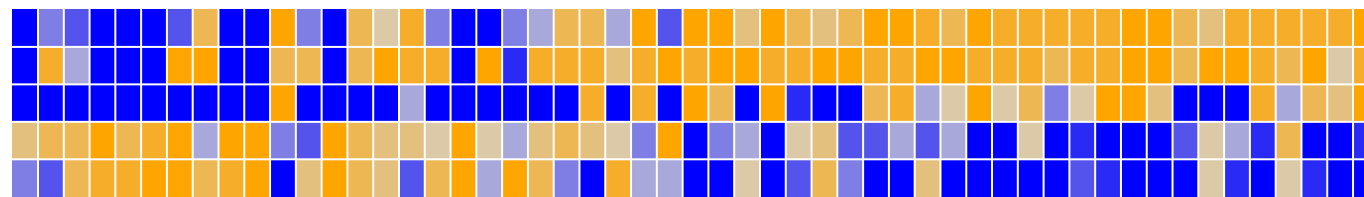

MITF  
SOX10  
TRPM1  
ZEB1  
AXL

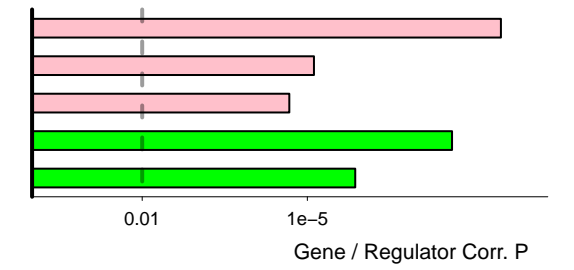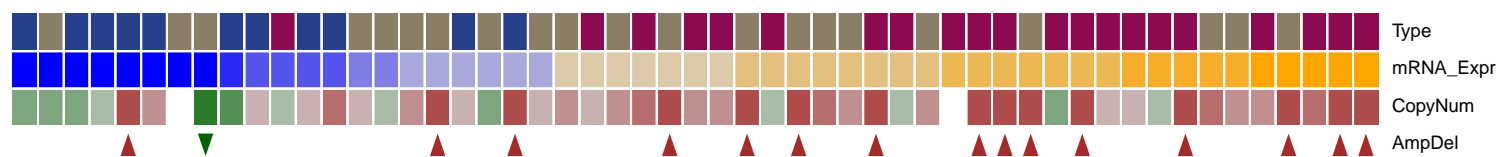

S2686  
S2645  
S2583  
S2261  
S2338  
S2688  
S2350  
S2410  
S2470  
S2125  
S2765  
S2405  
S2356  
S2423  
S2365  
S2247  
S2654  
S2770A  
S2549  
S2731  
S2650  
S2380  
S2379  
S2800  
S2320  
S2495  
S2374  
S2718  
S2812  
S2408  
S2333  
S2153  
S2392  
S2406  
S2216  
S2097  
S2667  
S2391  
S2189  
S2596  
S2373  
S2668  
S2330  
S2400  
S2279  
S2761  
S2767  
S2734  
S2510  
S2381  
S2508  
S2357  
S2521

# SOX6

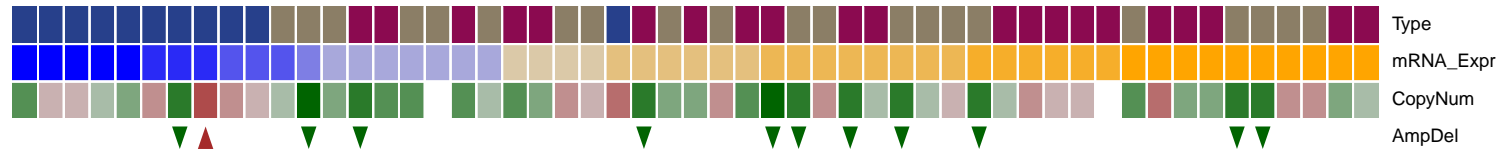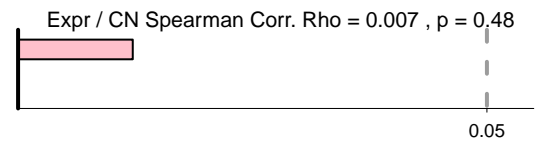

11:16761533  
11:16761506  
11:16761292  
11:16761290  
11:16635968  
11:16635016  
11:16634515  
11:16633647  
11:16633582  
11:16633070  
11:16632724  
11:16632636  
11:16632509  
11:16632311  
11:16632088  
11:16631993  
11:16629389  
11:16629217  
11:16629150  
11:16628944  
11:16628808  
11:16628640  
11:16628456  
11:16628335  
11:16628281  
11:16627172  
11:16626278  
11:16626109  
11:16625751  
11:16625664  
11:16625289  
11:16623818  
11:16533876  
11:16431370  
11:16430764  
11:16430247  
11:16424935  
11:16424708  
11:16424673  
11:16314417  
11:16298618  
11:16181614  
11:16170023  
11:16132747  
11:16034942  
11:16023708  
11:15997706  
11:15990149

Geneloc  
PromoterAssoc  
CpGIsland

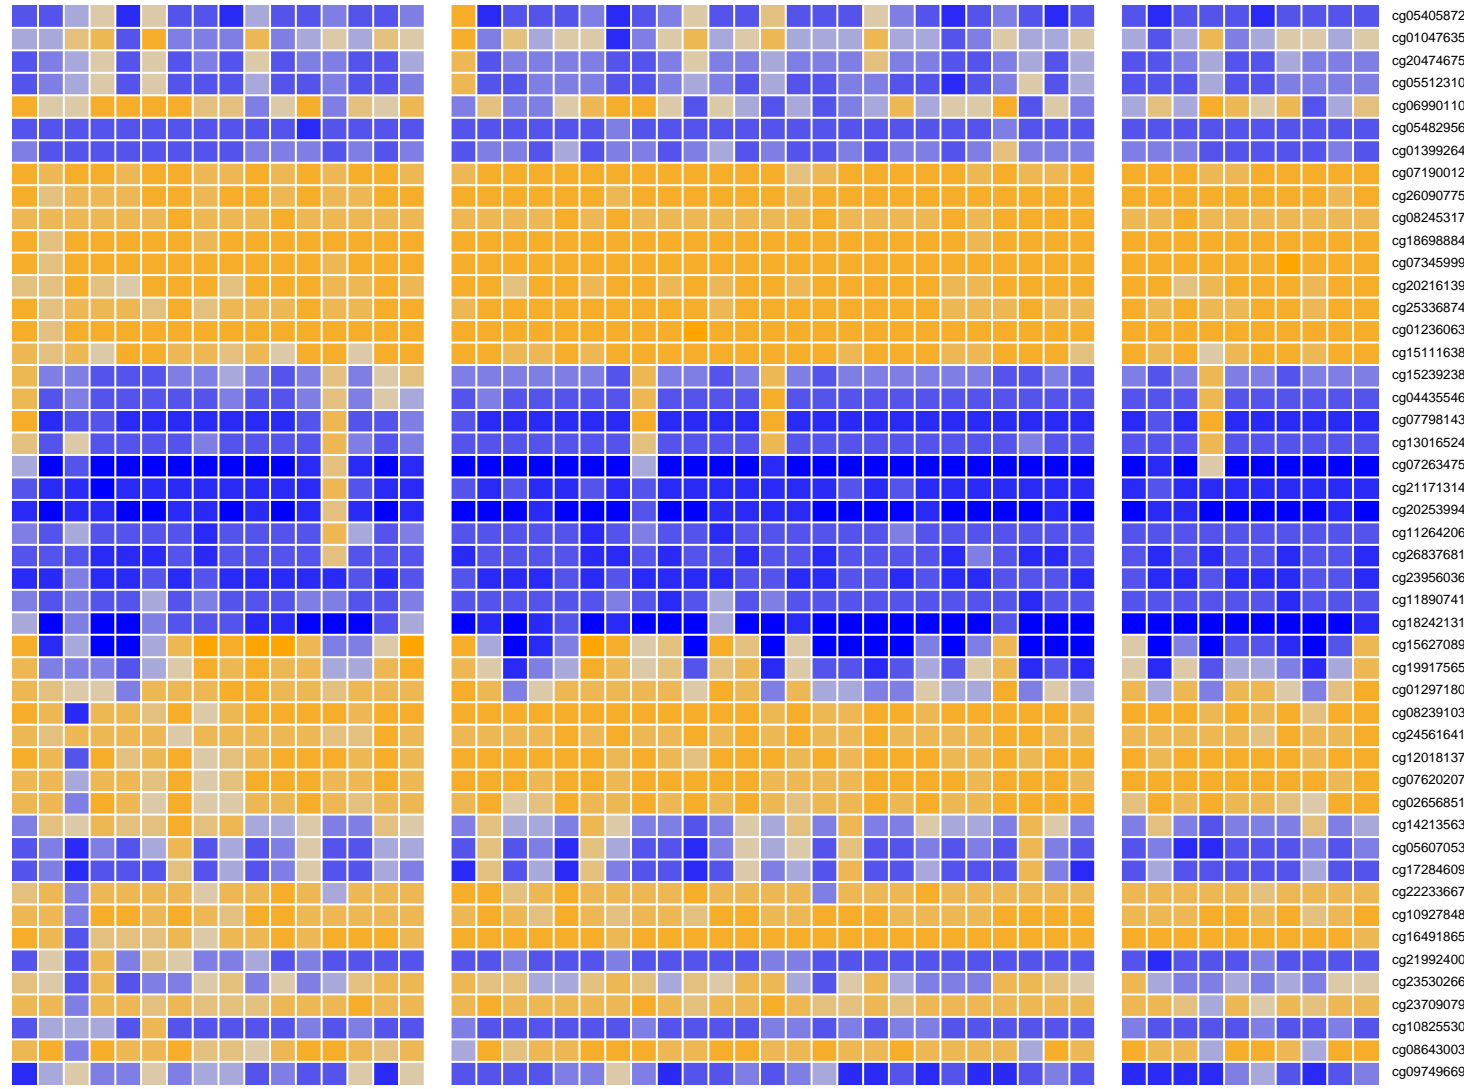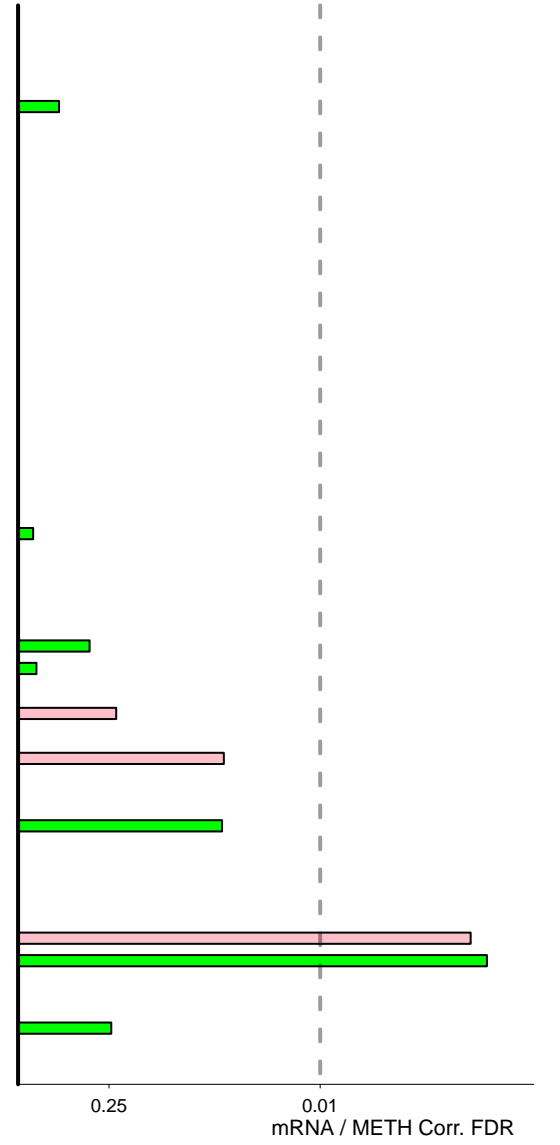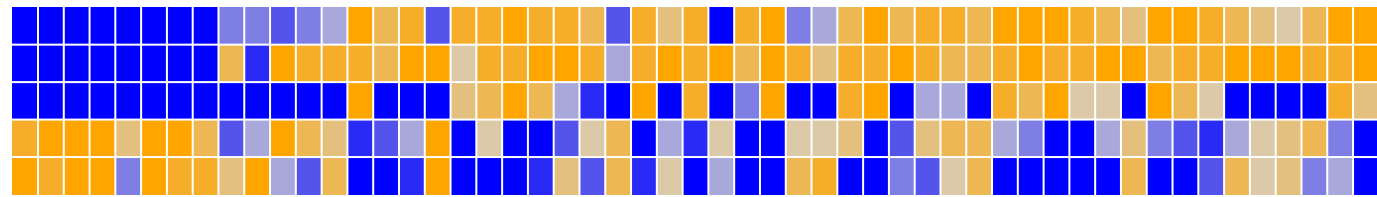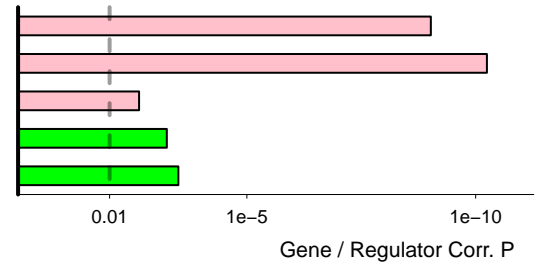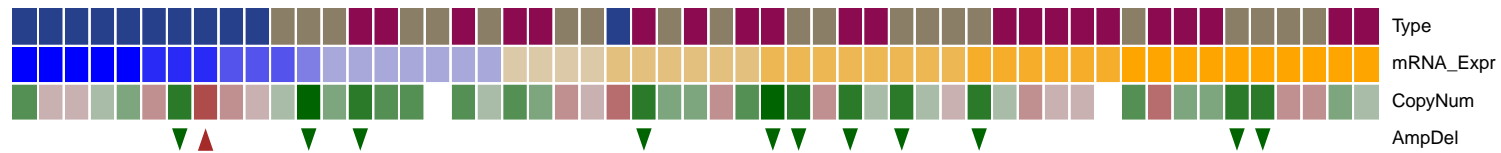

S2688  
S2261  
S2770A  
S2356  
S2686  
S2125  
S2470  
S2338  
S2405  
S2731  
S2495  
S2645  
S2650  
S2521  
S2761  
S2734  
S2350  
S2357  
S2596  
S2374  
S2508  
S2097  
S2333  
S2583  
S2330  
S2812  
S2510  
S2549  
S2373  
S2400  
S2654  
S2800  
S2379  
S2408  
S2392  
S2247  
S2423  
S2381  
S2216  
S2718  
S2391  
S2189  
S2667  
S2153  
S2765  
S2406  
S2668  
S2410  
S2767  
S2365  
S2380  
S2320  
S2279

# ERBB3

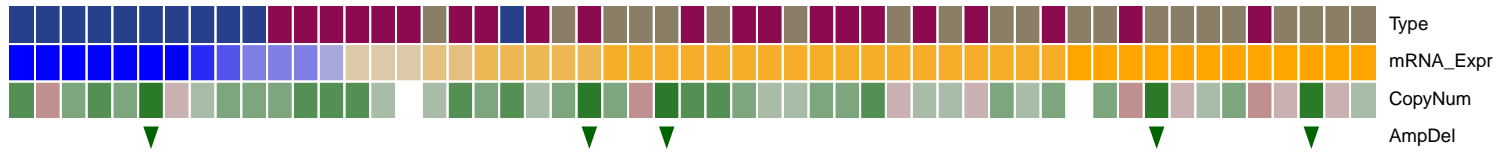

12:56472805  
12:56473753  
12:56474175  
12:56474392  
12:56474569  
12:56474771  
12:56475064  
12:56478329  
12:56479243  
12:56495114  
12:56497073

GeneLoc  
PromoterAssoc  
CpGIsland

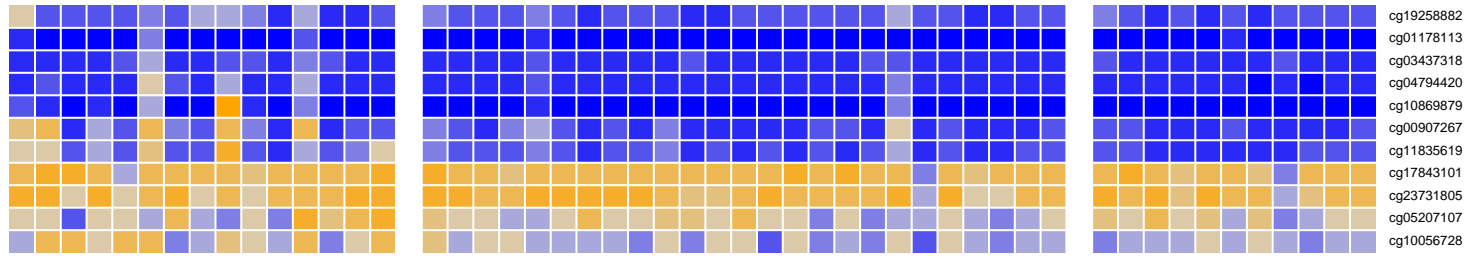

cg19258882  
cg01178113  
cg03437318  
cg04794420  
cg10869879  
cg00907267  
cg11835619  
cg17843101  
cg23731805  
cg05207107  
cg10056728

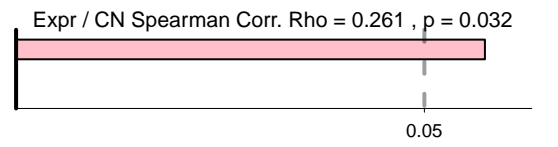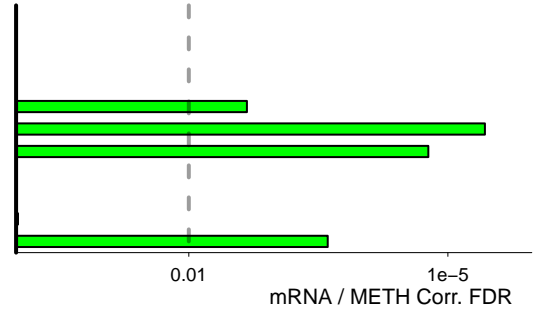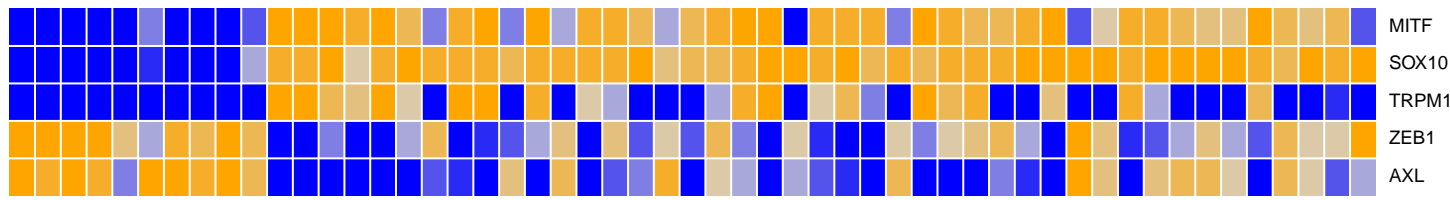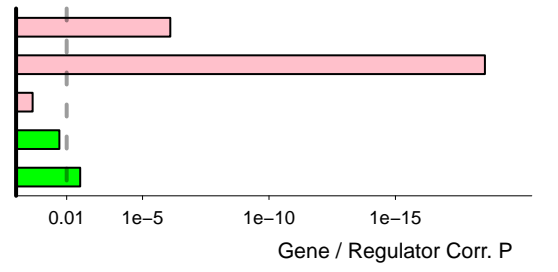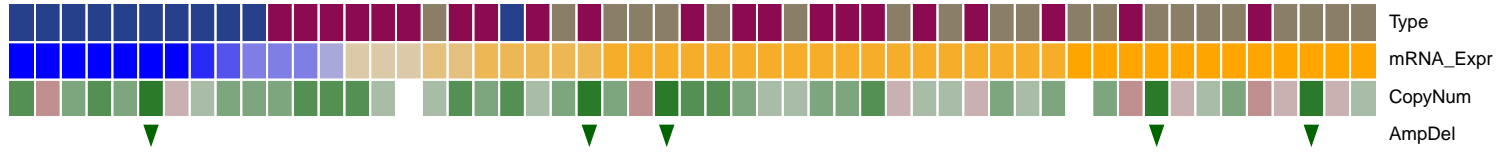

S2770A  
S2470  
S2356  
S2261  
S2686  
S2731  
S2688  
S2338  
S2125  
S2583  
S2374  
S2391  
S2718  
S2357  
S2408  
S2667  
S2645  
S2330  
S2521  
S2405  
S2216  
S2650  
S2189  
S2247  
S2392  
S2800  
S2761  
S2381  
S2320  
S2400  
S2549  
S2668  
S2508  
S2373  
S2654  
S2765  
S2596  
S2379  
S2380  
S2734  
S2279  
S2350  
S2365  
S2510  
S2097  
S2410  
S2153  
S2812  
S2406  
S2423  
S2767  
S2333  
S2495

# PIR

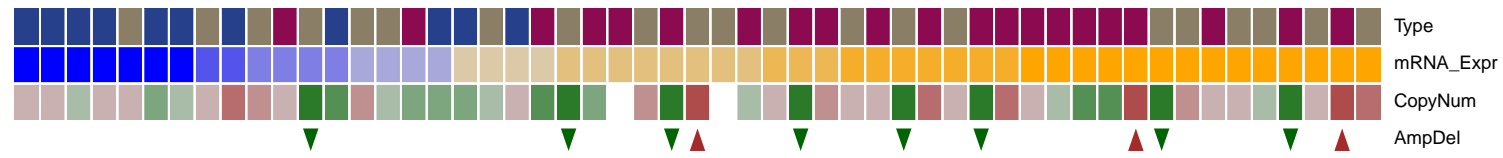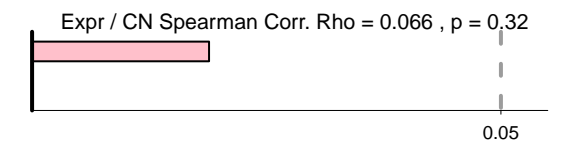

X : 15511773  
 X : 15511751  
 X : 15511746  
 X : 15511733  
 X : 15511684  
 X : 15511680  
 X : 15511530  
 X : 15511525  
 X : 15511482  
 X : 15511437  
 X : 15511430  
 X : 15510812  
 X : 15509191  
 X : 15403752  
 X : 15403117

GeneLoc  
 PromoterAssoc  
 CpGIsland

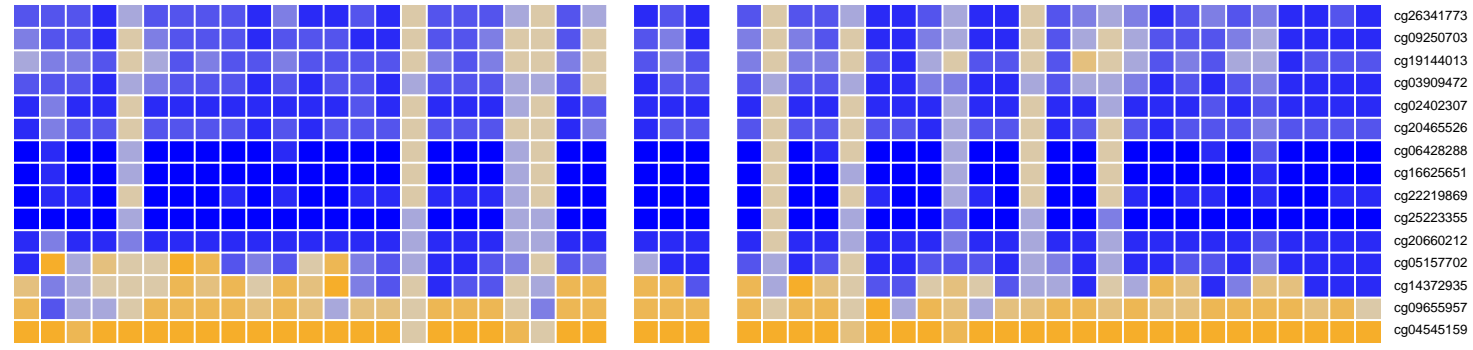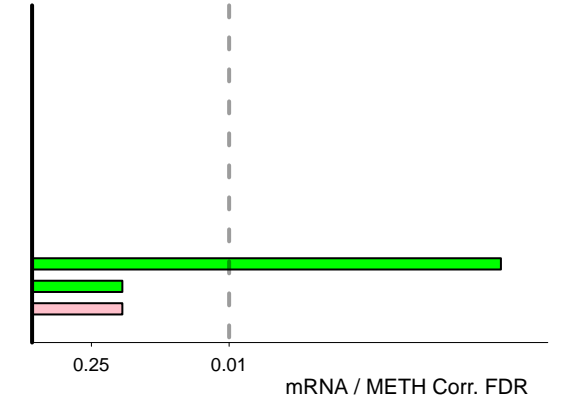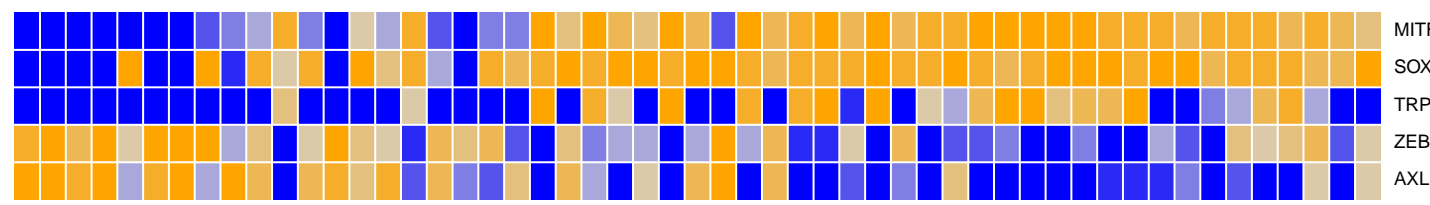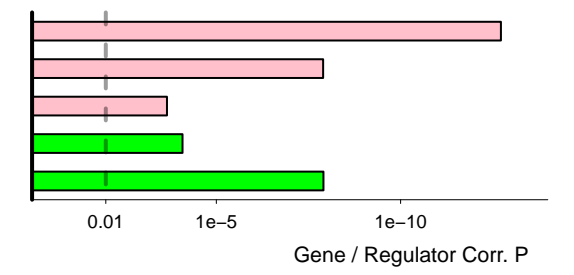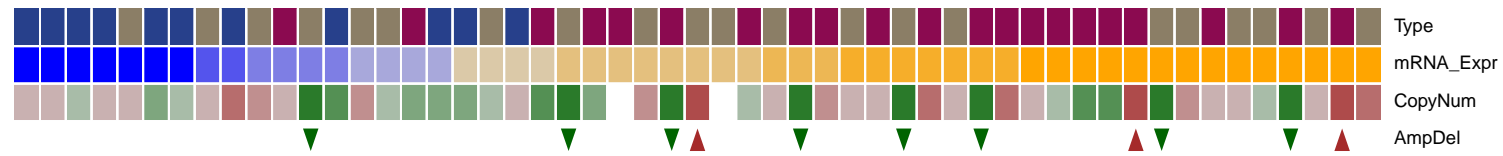

S2688  
 S2770A  
 S2338  
 S2125  
 S2549  
 S2261  
 S2356  
 S2495  
 S2731  
 S2650  
 S2357  
 S2654  
 S2470  
 S2365  
 S2800  
 S2668  
 S2583  
 S2686  
 S2645  
 S2405  
 S2374  
 S2153  
 S2320  
 S2667  
 S2812  
 S2408  
 S2410  
 S2350  
 S2216  
 S2423  
 S2510  
 S2521  
 S2333  
 S2400  
 S2380  
 S2189  
 S2097  
 S2406  
 S2765  
 S2391  
 S2279  
 S2718  
 S2508  
 S2330  
 S2734  
 S2392  
 S2373  
 S2247  
 S2596  
 S2379  
 S2381  
 S2761  
 S2767

Type  
 mRNA\_Expr  
 CopyNum  
 AmpDel

# STK32A

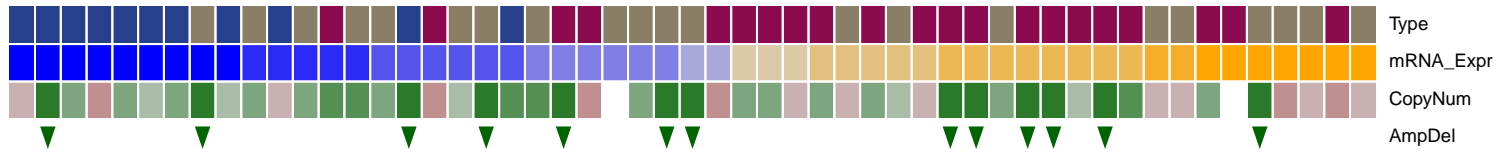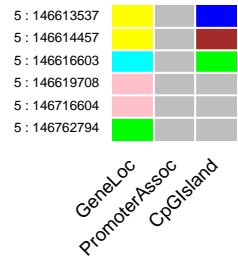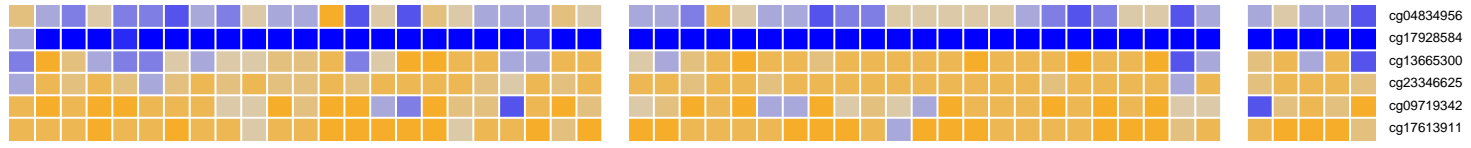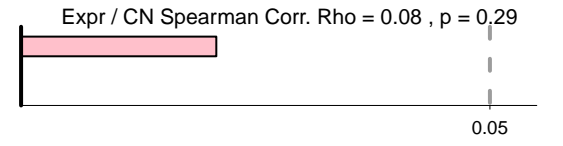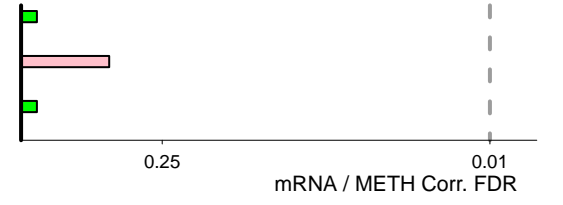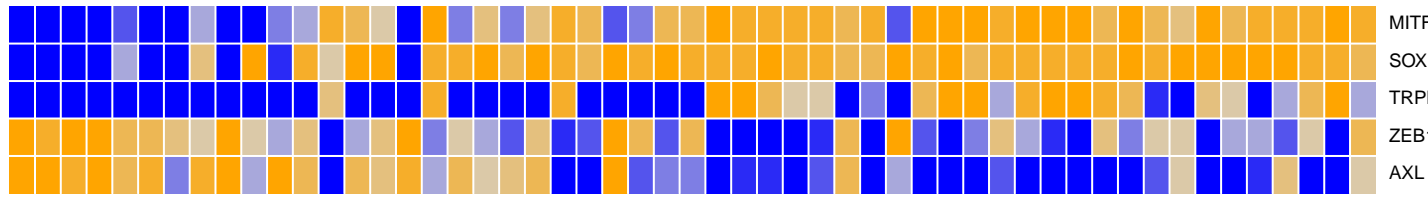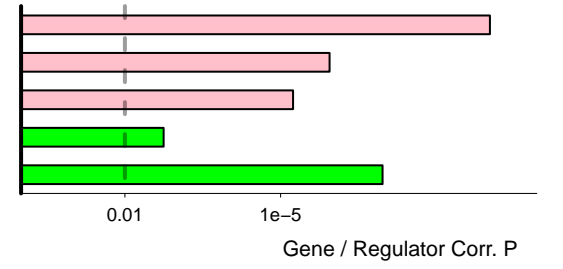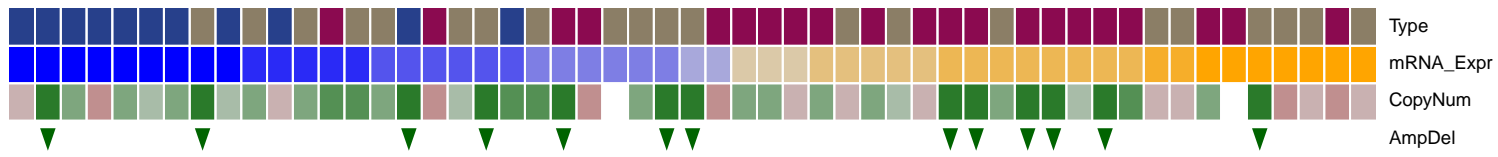

- S2770A
- S2688
- S2261
- S2125
- S2583
- S2338
- S2686
- S2800
- S2356
- S2549
- S2731
- S2650
- S2357
- S2410
- S2365
- S2470
- S2320
- S2654
- S2812
- S2405
- S2153
- S2510
- S2761
- S2350
- S2645
- S2392
- S2380
- S2374
- S2330
- S2508
- S2189
- S2668
- S2423
- S2373
- S2495
- S2406
- S2400
- S2765
- S2247
- S2216
- S2521
- S2408
- S2379
- S2718
- S2333
- S2767
- S2279
- S2667
- S2734
- S2097
- S2596
- S2391
- S2381

# SCARB1

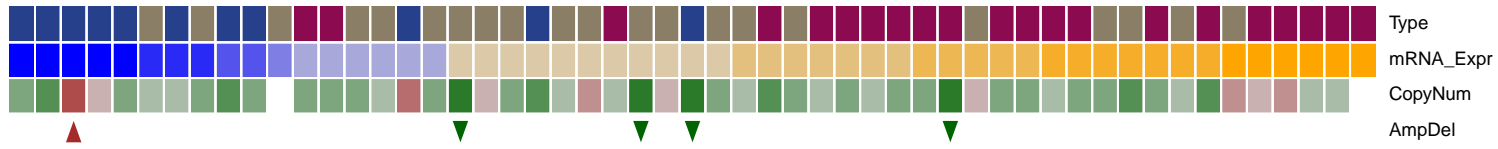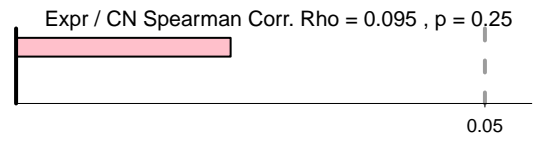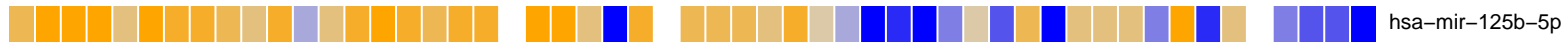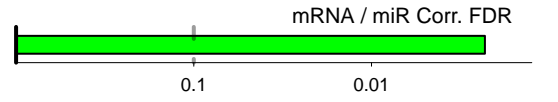

12 : 125359265  
12 : 125349072  
12 : 125348987  
12 : 125348871  
12 : 125347797  
12 : 125346253  
12 : 125333358  
12 : 125333322  
12 : 125333267  
12 : 125332183  
12 : 125328475  
12 : 125322578  
12 : 125320887  
12 : 125308217  
12 : 125299800  
12 : 125299686  
12 : 125299563  
12 : 125298876  
12 : 125297360  
12 : 125292513  
12 : 125287607  
12 : 125282480  
12 : 125271306  
12 : 125262508  
12 : 125262045

GeneLoc  
PromoterAssoc  
CpGIsland

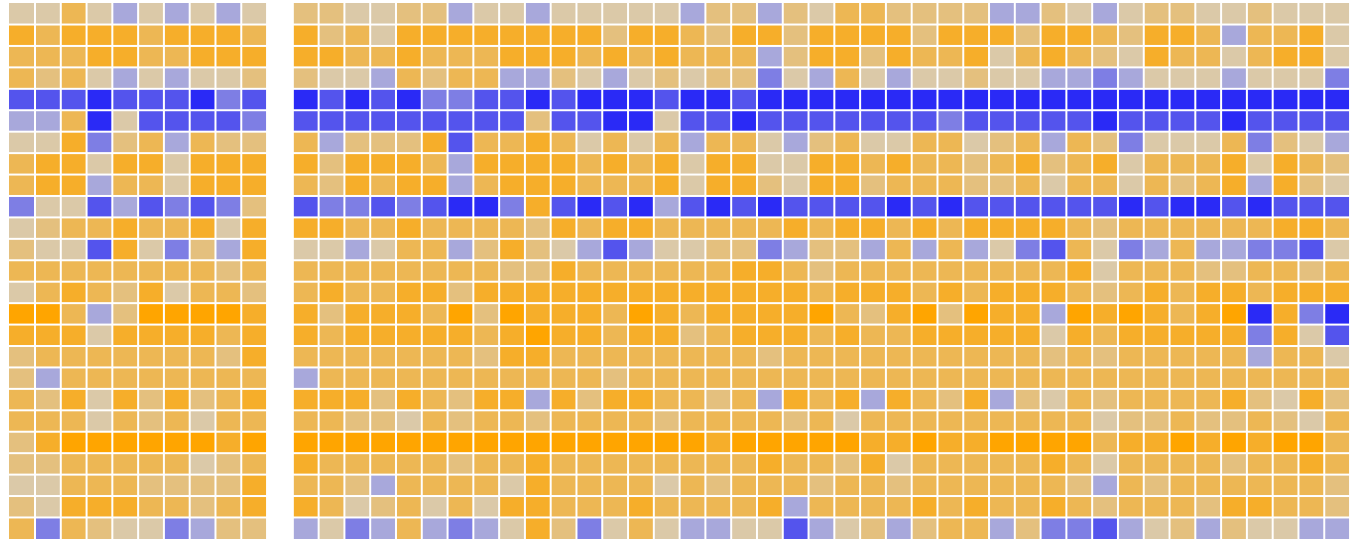

cg07675647  
cg17878881  
cg16943612  
cg27180443  
cg06719671  
cg15282973  
cg23460943  
cg14846380  
cg13075279  
cg22775642  
cg12079885  
cg17534092  
cg05302218  
cg03423228  
cg21558509  
cg01663970  
cg19950933  
cg23556238  
cg25043237  
cg21442040  
cg11192877  
cg14849578  
cg10911287  
cg17057702  
cg09789874

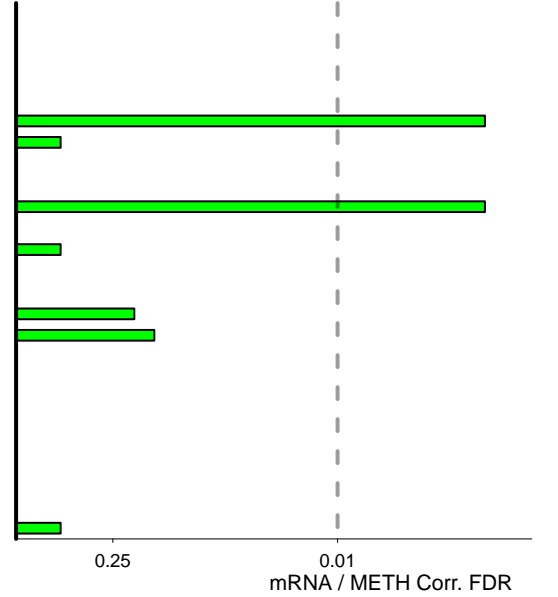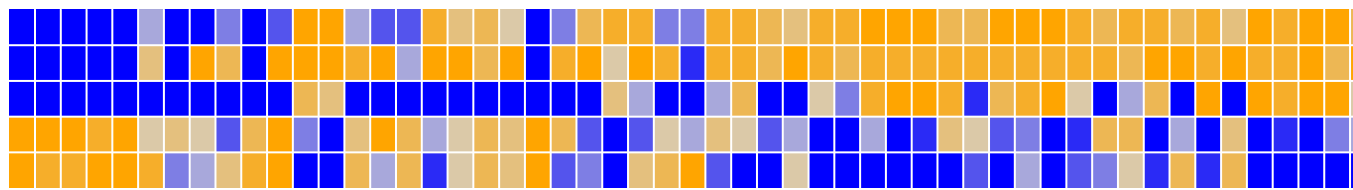

MITF  
SOX10  
TRPM1  
ZEB1  
AXL

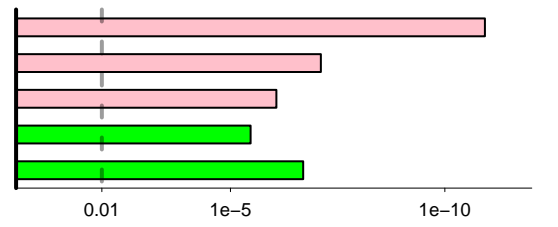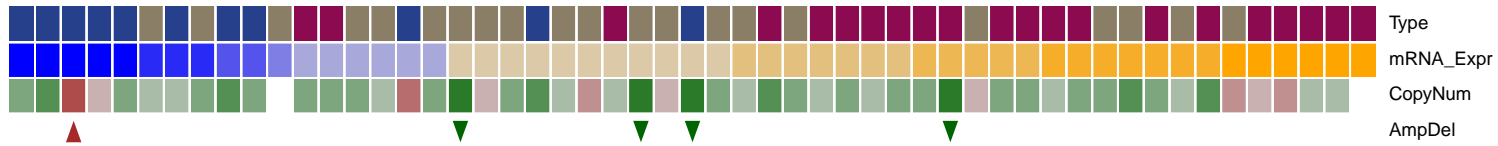

S2356  
S2261  
S2470  
S2688  
S2125  
S2800  
S2686  
S2549  
S2405  
S2338  
S2350  
S2718  
S2279  
S2650  
S2495  
S2583  
S2734  
S2767  
S2423  
S2365  
S2770A  
S2645  
S2392  
S2357  
S2097  
S2654  
S2731  
S2247  
S2596  
S2761  
S2812  
S2189  
S2373  
S2216  
S2374  
S2521  
S2379  
S2333  
S2406  
S2320  
S2408  
S2668  
S2380  
S2381  
S2508  
S2410  
S2330  
S2153  
S2391  
S2510  
S2400  
S2765  
S2667

Gene / Regulator Corr. P

# OVOS2

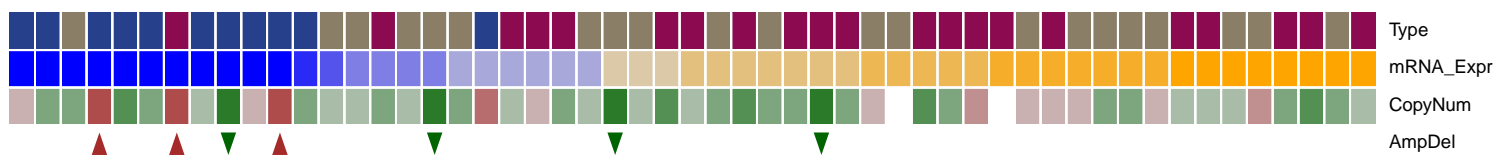

12:31276852  
12:31274424  
12:31272865  
12:31272119  
12:31272114  
12:31272112  
12:31271783  
12:31271429

GeneLoc  
PromoterAssoc  
CpGIsland

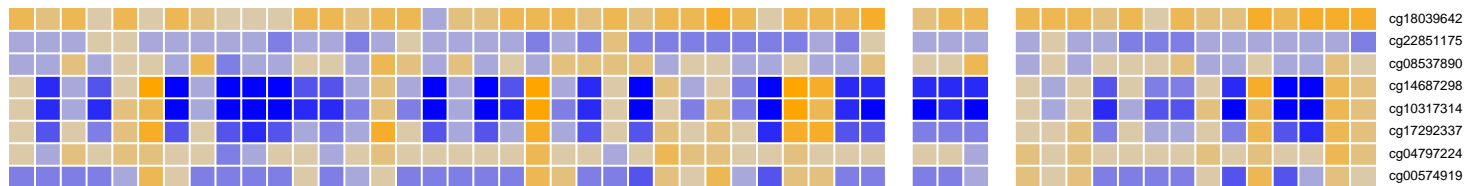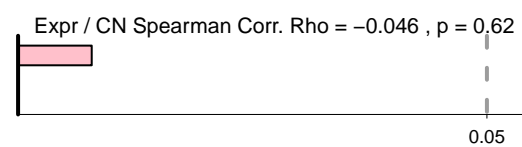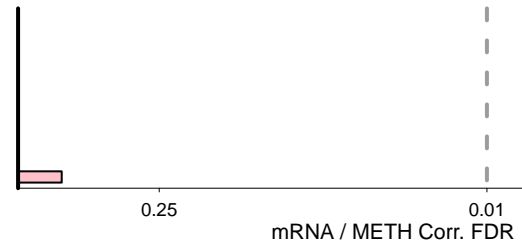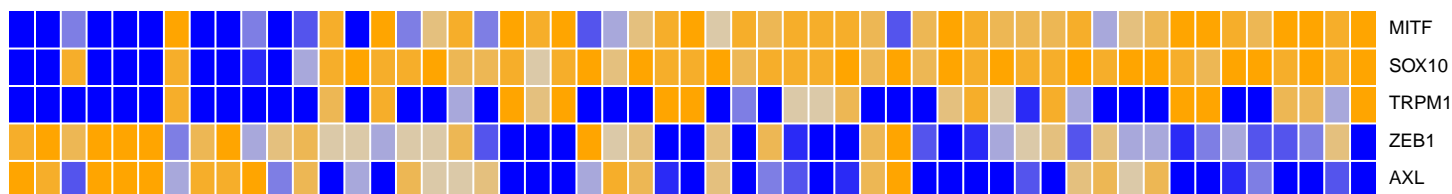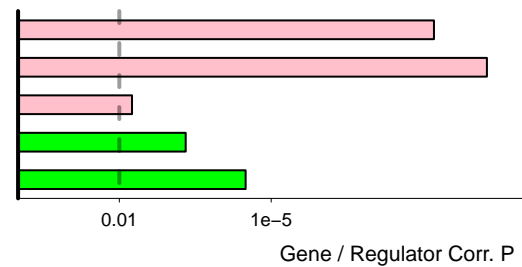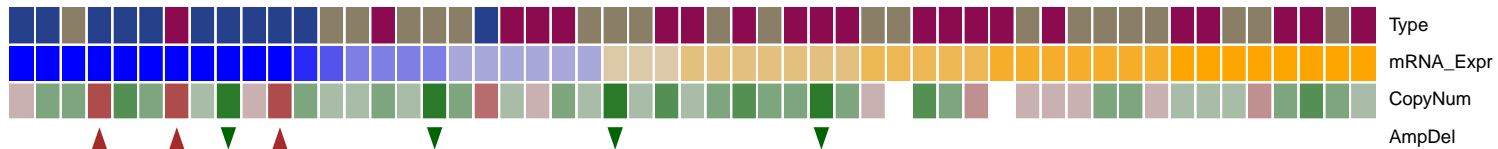

S2688  
S2261  
S2645  
S2770A  
S2125  
S2356  
S2320  
S2338  
S2470  
S2731  
S2686  
S2583  
S2596  
S2549  
S2216  
S2654  
S2767  
S2381  
S2405  
S2391  
S2357  
S2374  
S2495  
S2800  
S2153  
S2330  
S2408  
S2365  
S2373  
S2380  
S2668  
S2189  
S2508  
S2423  
S2350  
S2761  
S2279  
S2510  
S2667  
S2333  
S2379  
S2097  
S2650  
S2812  
S2410  
S2521  
S2765  
S2734  
S2392  
S2406  
S2718  
S2247  
S2400



# CHCHD6

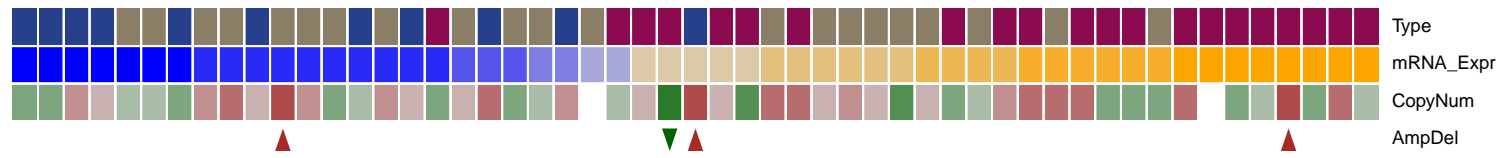

3 : 126422260  
 3 : 126422536  
 3 : 126422575  
 3 : 126423799  
 3 : 126426394  
 3 : 126438050  
 3 : 126440043  
 3 : 126471560  
 3 : 126500809  
 3 : 126554736  
 3 : 126569599  
 3 : 126570587  
 3 : 126577851  
 3 : 126614750  
 3 : 126630478  
 3 : 126645244  
 3 : 126671985  
 3 : 126679199

GeneLoc  
 PromoterAssoc  
 CpGIsland

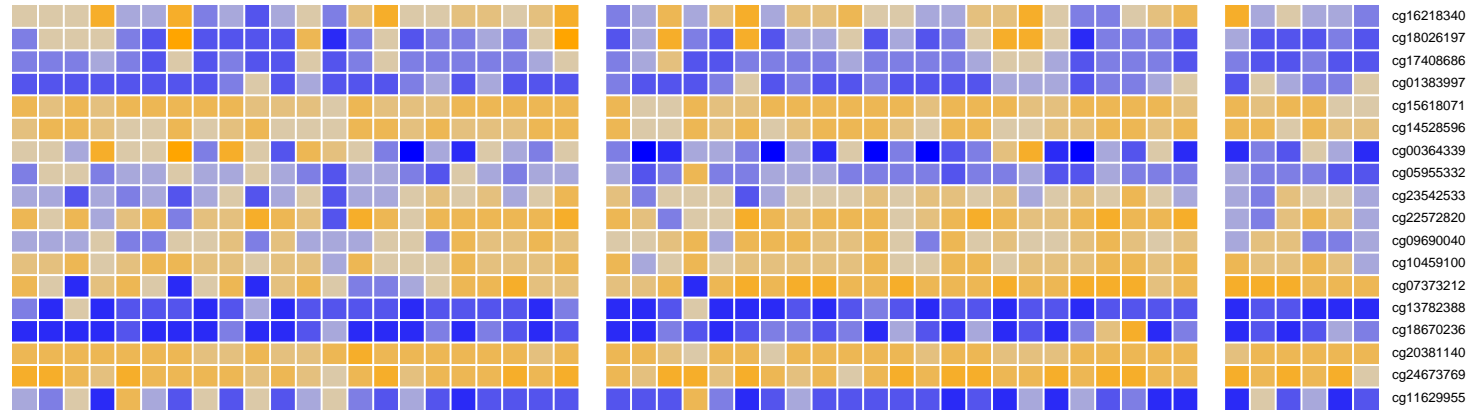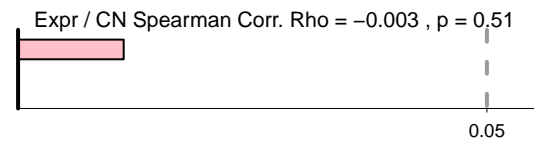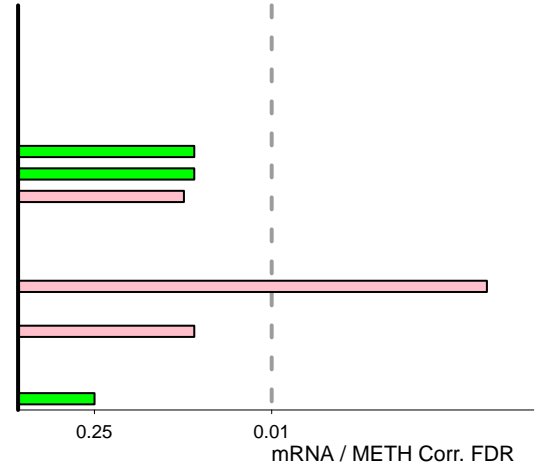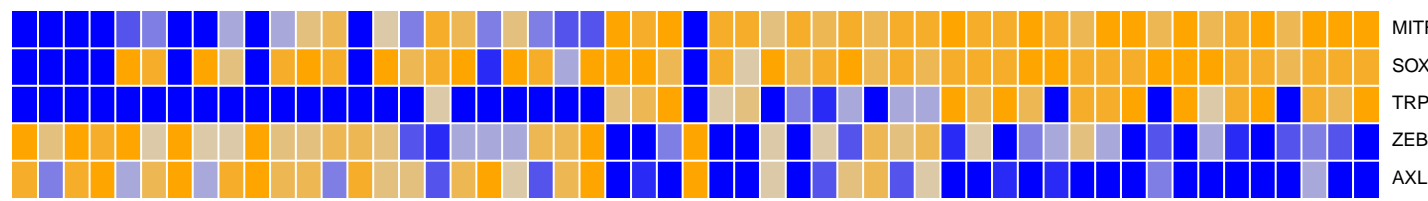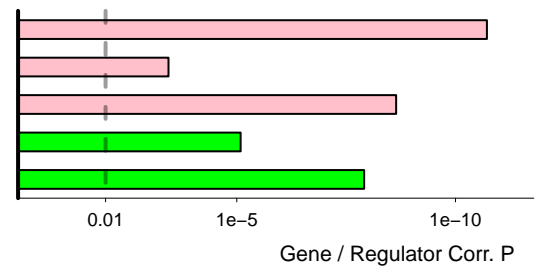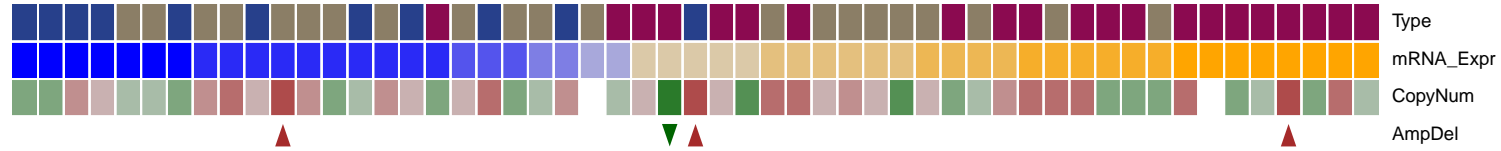

S2261  
 S2686  
 S2470  
 S2688  
 S2495  
 S2654  
 S2356  
 S2549  
 S2800  
 S2125  
 S2650  
 S2153  
 S2380  
 S2338  
 S2365  
 S2405  
 S2668  
 S2410  
 S2731  
 S2812  
 S2645  
 S2583  
 S2350  
 S2279  
 S2508  
 S2765  
 S2770A  
 S2189  
 S2357  
 S2767  
 S2373  
 S2333  
 S2097  
 S2423  
 S2247  
 S2381  
 S2521  
 S2596  
 S2330  
 S2718  
 S2734  
 S2379  
 S2216  
 S2391  
 S2392  
 S2400  
 S2667  
 S2510  
 S2408  
 S2761  
 S2320  
 S2406  
 S2374

Type  
 mRNA\_Expr  
 CopyNum  
 AmpDel

# SORT1

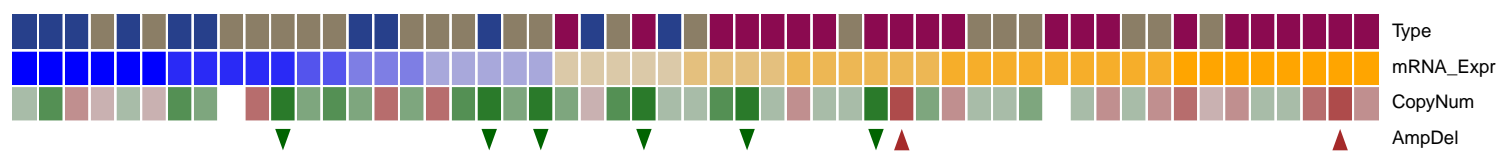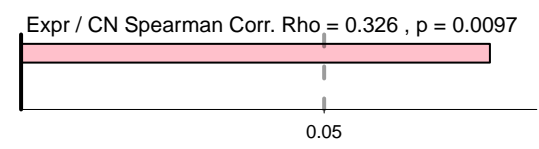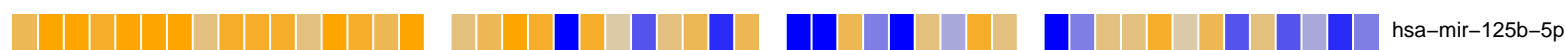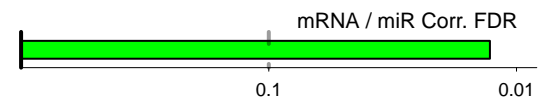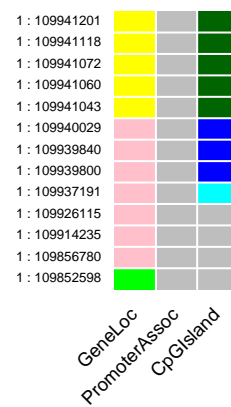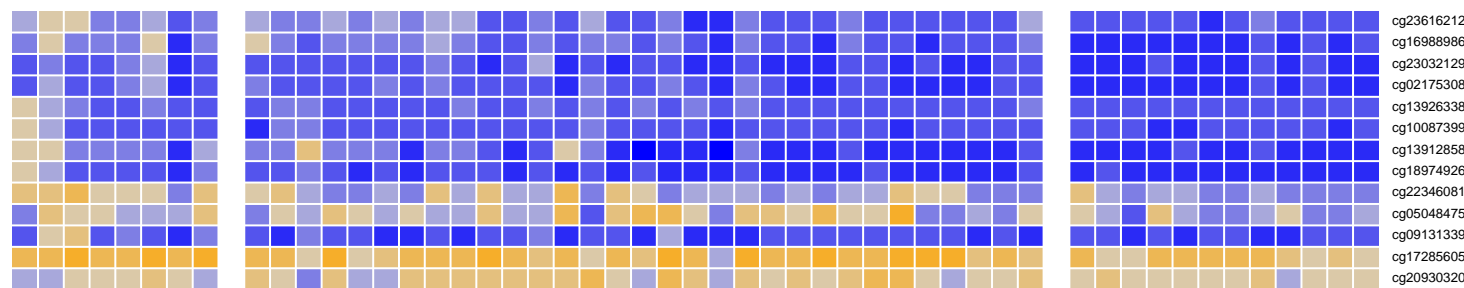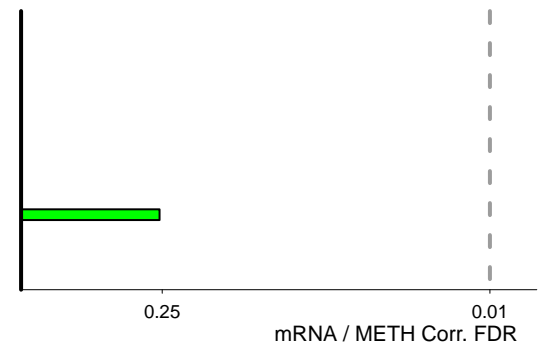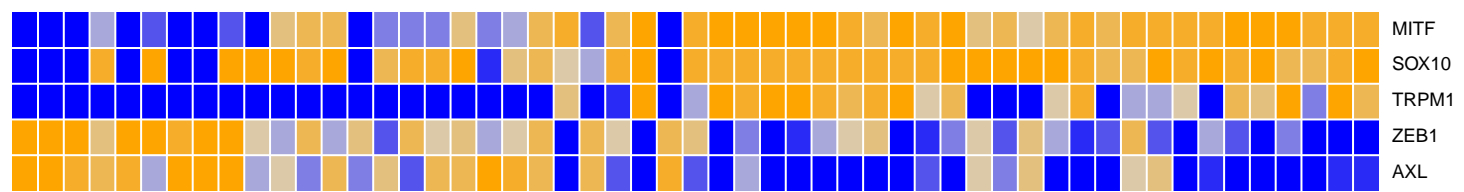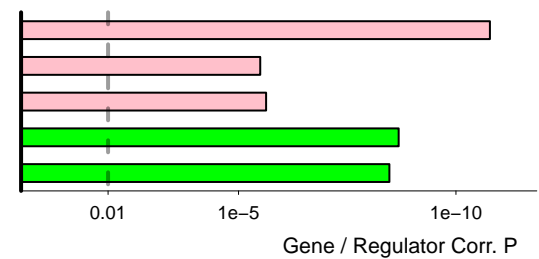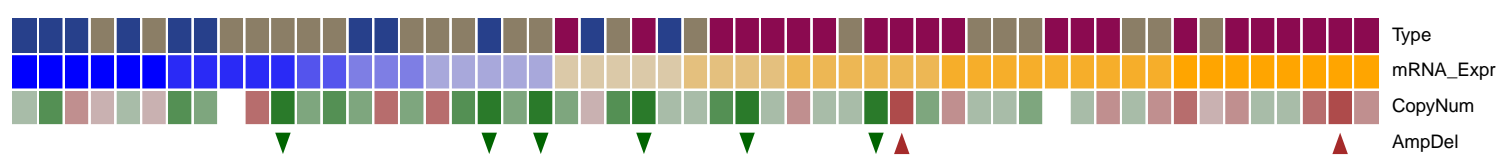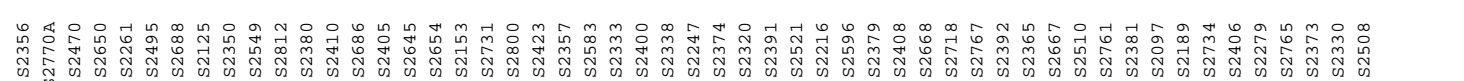

# MICAL1

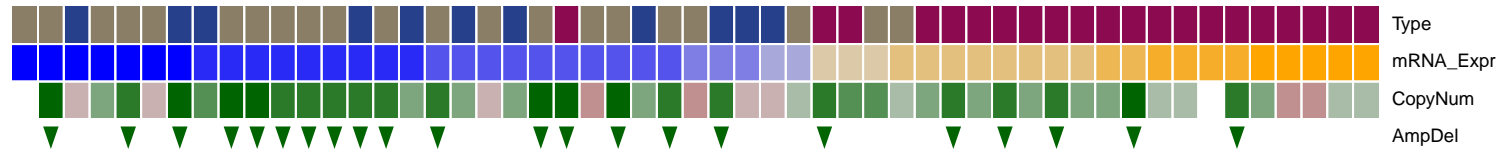

6:109780058  
6:109778433  
6:109777642  
6:109777592  
6:109775161  
6:109775014  
6:109774738

GeneLoc  
PromoterAssoc  
CpGIsland

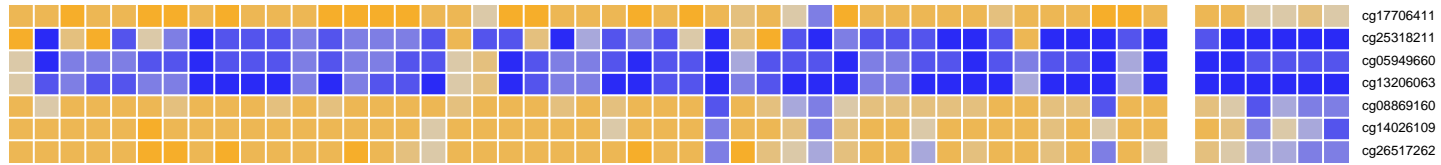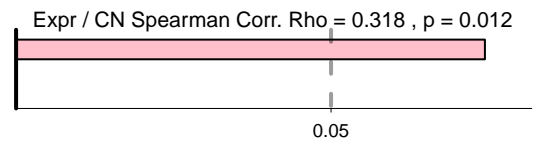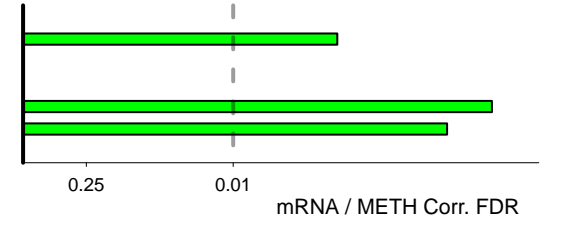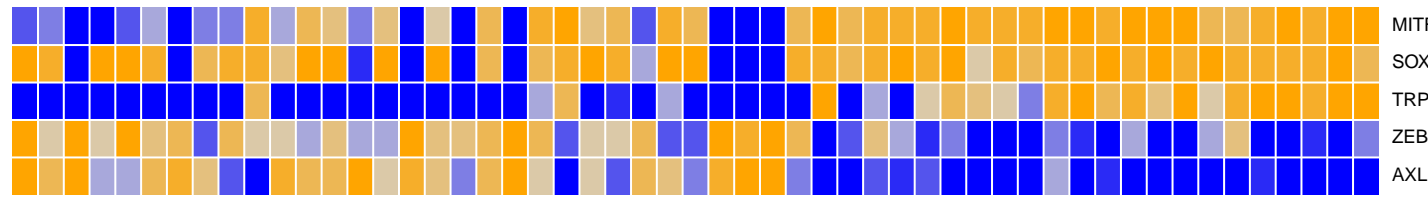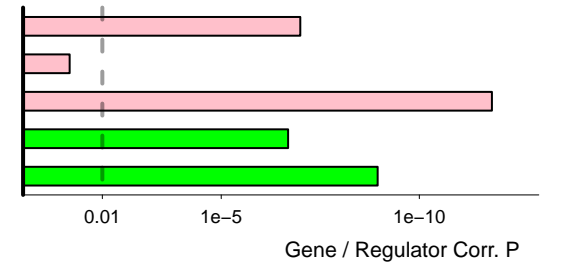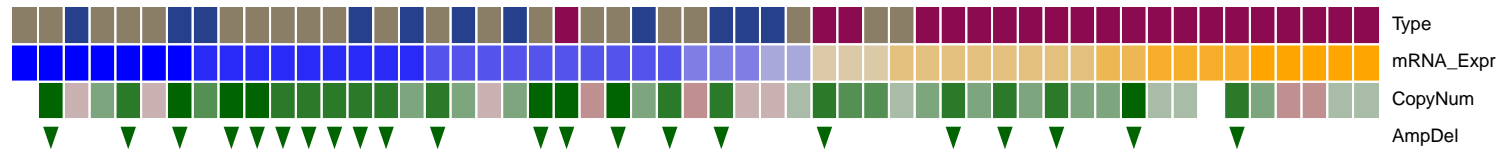

S2350  
S2654  
S2125  
S2549  
S2495  
S2650  
S2338  
S2405  
S2645  
S2596  
S2800  
S2410  
S2153  
S2731  
S2812  
S2261  
S2365  
S2686  
S2423  
S2356  
S2381  
S2406  
S2767  
S2333  
S2583  
S2097  
S2392  
S2470  
S2688  
S2770A  
S2380  
S2391  
S2761  
S2247  
S2734  
S2668  
S2718  
S2357  
S2189  
S2373  
S2320  
S2521  
S2508  
S2216  
S2279  
S2408  
S2667  
S2379  
S2330  
S2374  
S2510  
S2400  
S2765

# PRDM7

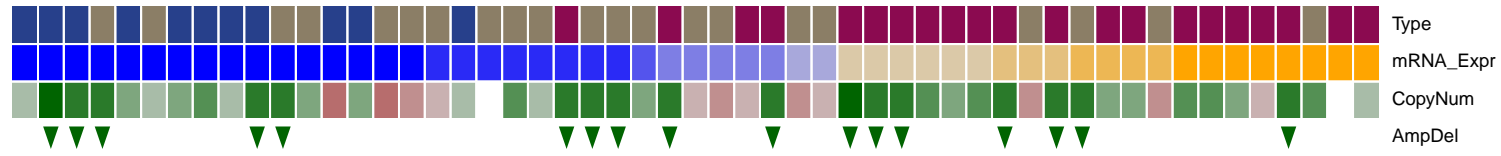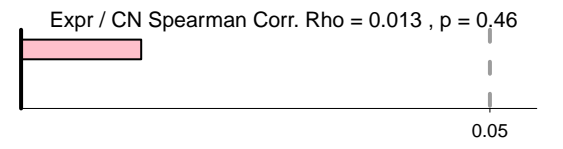

16 : 90158077  
 16 : 90148962  
 16 : 90148775  
 16 : 90148683  
 16 : 90144788  
 16 : 90144006  
 16 : 90143852  
 16 : 90143815  
 16 : 90143788  
 16 : 90143751  
 16 : 90142525  
 16 : 90140530  
 16 : 90130162  
 16 : 90128833  
 16 : 90128361  
 16 : 90125163  
 16 : 90124400

GeneLoc  
 PromoterAssoc  
 CpGIsland

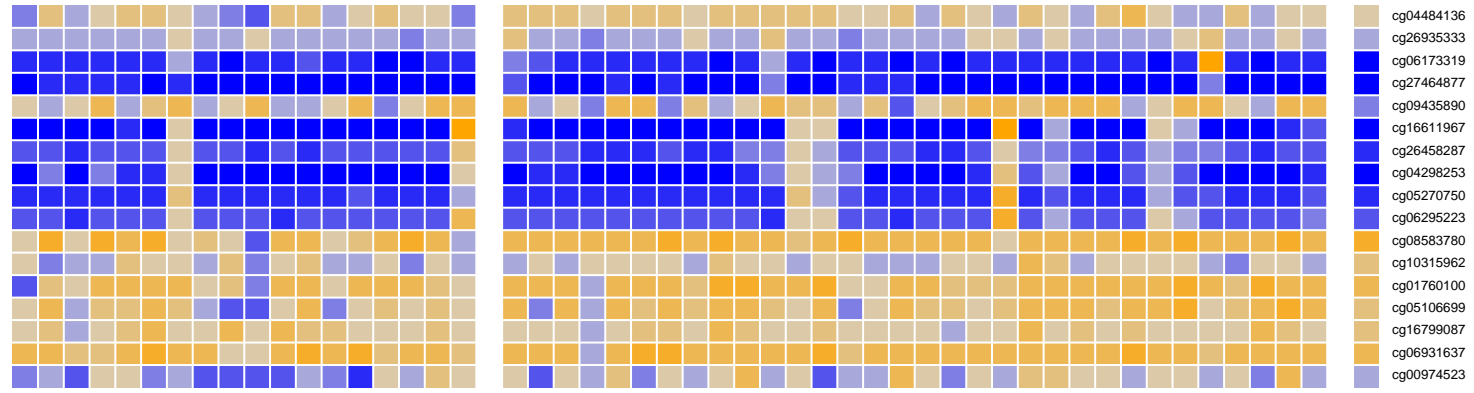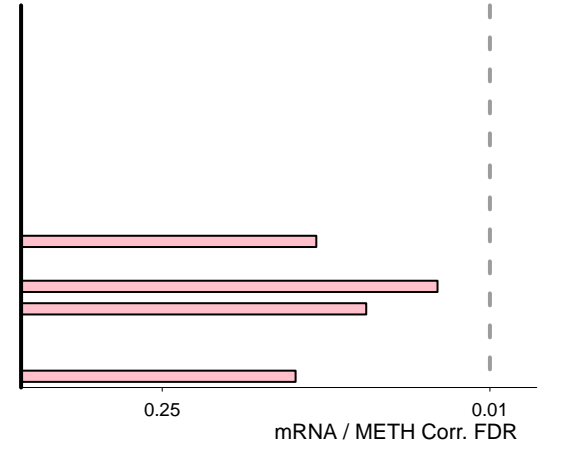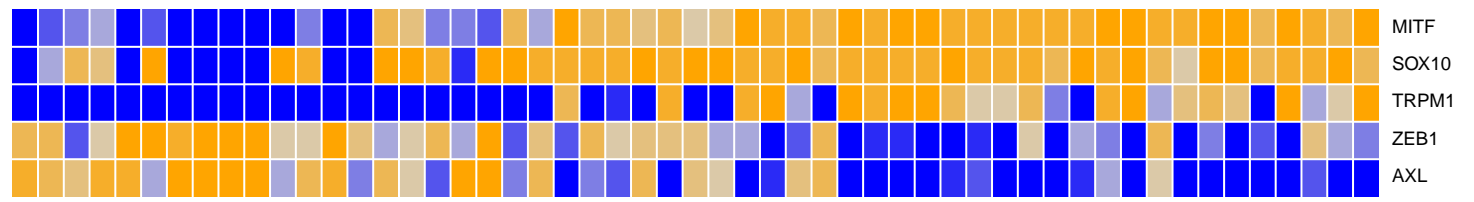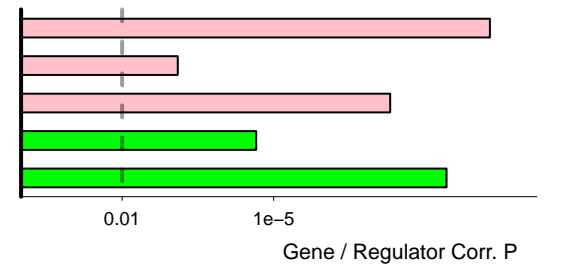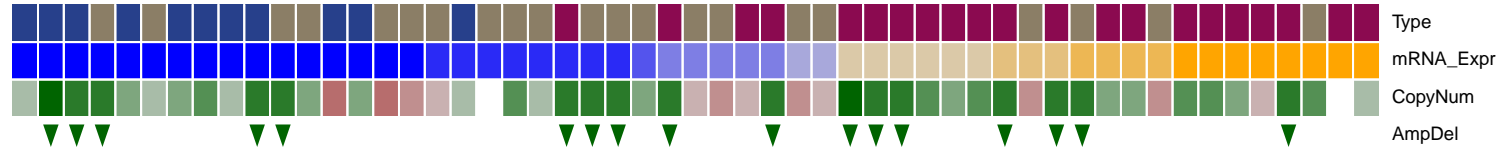

S2338  
 S2583  
 S2405  
 S2800  
 S2261  
 S2495  
 S2688  
 S2770A  
 S2356  
 S2125  
 S2549  
 S2654  
 S2470  
 S2686  
 S2410  
 S2767  
 S2645  
 S2731  
 S2350  
 S2392  
 S2650  
 S2406  
 S2380  
 S2333  
 S2153  
 S2379  
 S2365  
 S2812  
 S2216  
 S2330  
 S2097  
 S2423  
 S2408  
 S2510  
 S2521  
 S2374  
 S2508  
 S2668  
 S2189  
 S2596  
 S2373  
 S2734  
 S2320  
 S2400  
 S2381  
 S2357  
 S2718  
 S2279  
 S2761  
 S2391  
 S2247  
 S2667  
 S2765

# IL16

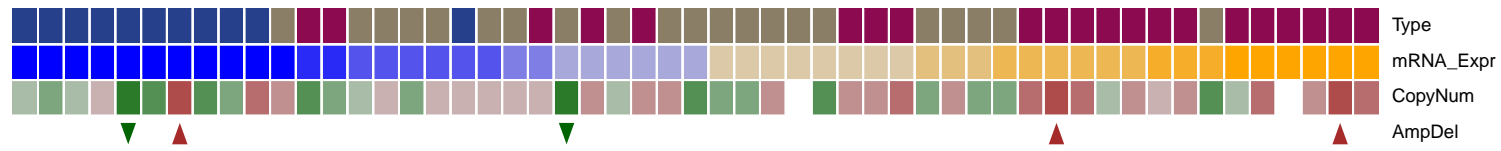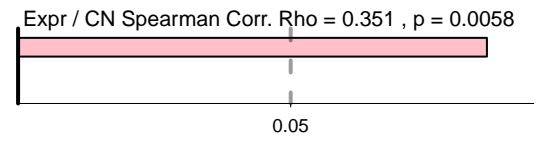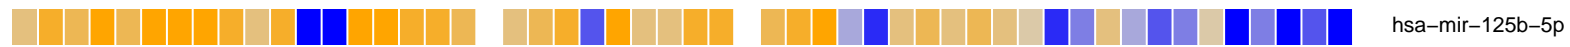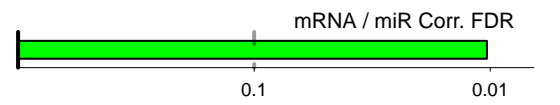

15 : 81451271  
 15 : 81452032  
 15 : 81453270  
 15 : 81453408  
 15 : 81456832  
 15 : 81466841  
 15 : 81468599  
 15 : 81468859  
 15 : 81474451  
 15 : 81475061  
 15 : 81475638  
 15 : 81488168  
 15 : 81488338  
 15 : 81489075  
 15 : 81489160  
 15 : 81489338  
 15 : 81491460  
 15 : 81509050  
 15 : 81528661  
 15 : 81547011  
 15 : 81575002  
 15 : 81586571  
 15 : 81587108  
 15 : 81587493  
 15 : 81589248  
 15 : 81596332  
 15 : 81604544

GeneLoc  
 PromoterAssoc  
 CpGIsland

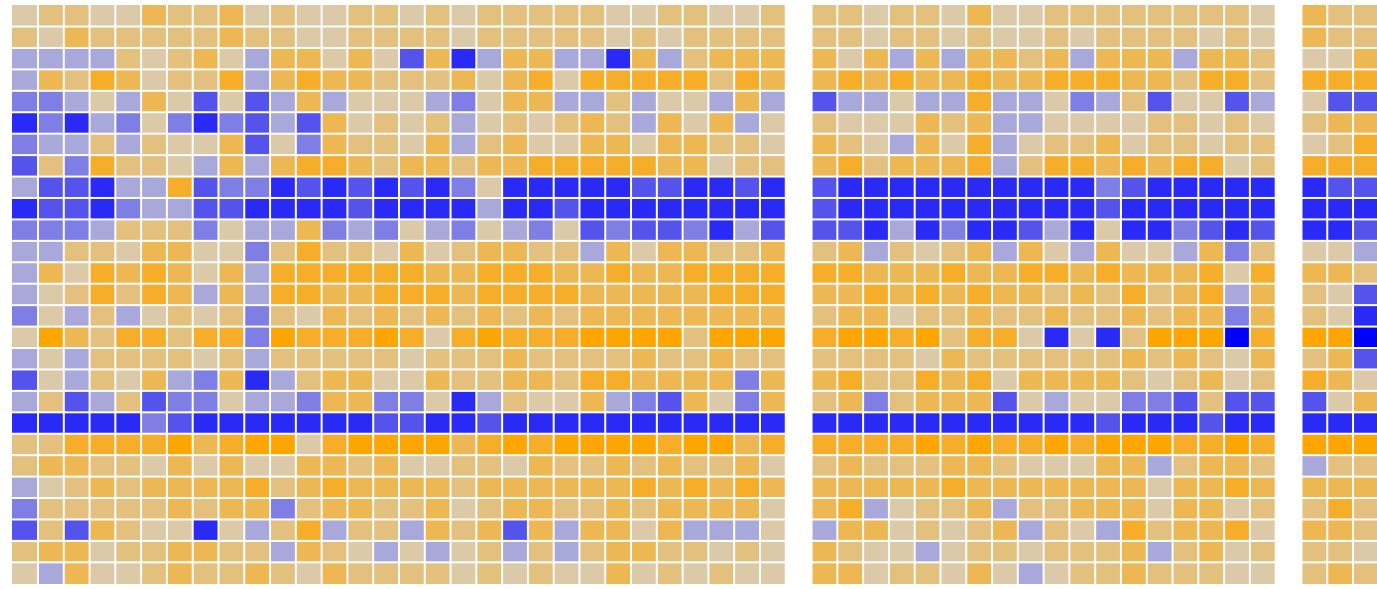

cg16526636  
 cg16803736  
 cg10530344  
 cg05627365  
 cg11442608  
 cg13488011  
 cg00218792  
 cg05617678  
 cg02326224  
 cg26657240  
 cg01001286  
 cg26385554  
 cg20368664  
 cg23936860  
 cg08255105  
 cg04173211  
 cg16580742  
 cg05042034  
 cg11808699  
 cg23729777  
 cg04518384  
 cg18097277  
 cg14899065  
 cg14898127  
 cg13840520  
 cg19620333  
 cg03180322

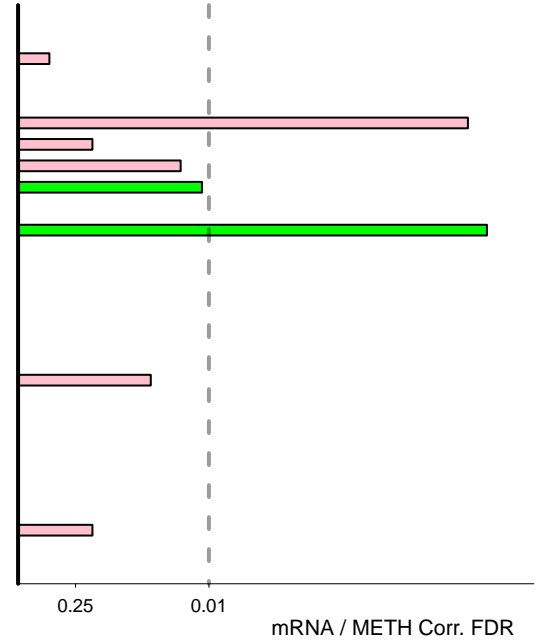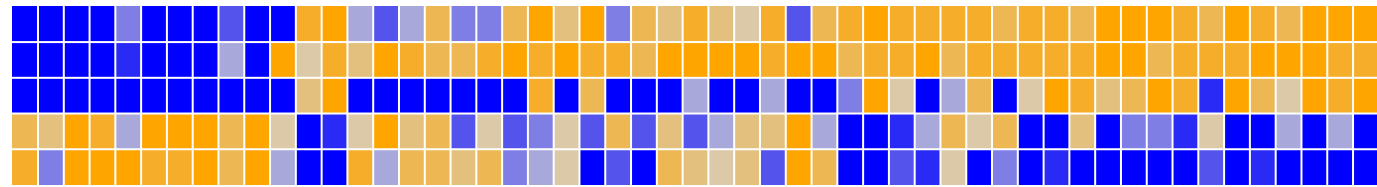

MITF  
 SOX10  
 TRPM1  
 ZEB1  
 AXL

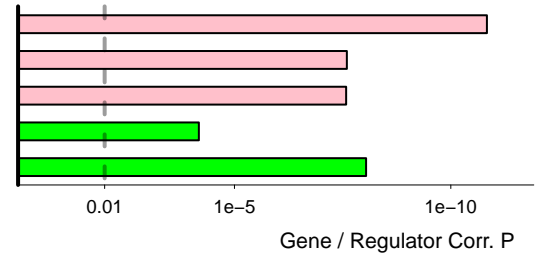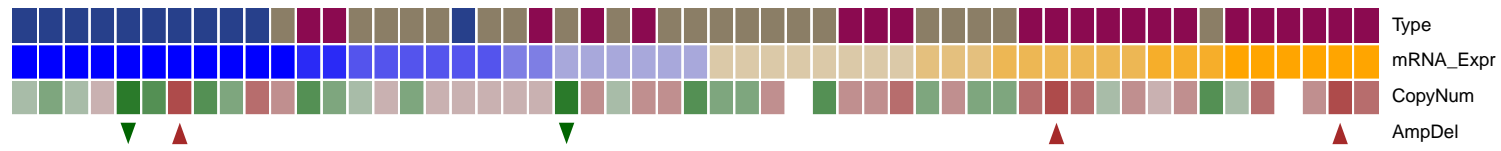

S2338  
 S2686  
 S2356  
 S2688  
 S2731  
 S2261  
 S2470  
 S2770A  
 S2583  
 S2125  
 S2549  
 S2357  
 S2521  
 S2800  
 S2495  
 S2650  
 S2423  
 S2405  
 S2654  
 S2392  
 S2320  
 S2767  
 S2406  
 S2645  
 S2761  
 S2153  
 S2097  
 S2812  
 S2365  
 S2247  
 S2350  
 S2410  
 S2373  
 S2374  
 S2668  
 S2734  
 S2381  
 S2596  
 S2380  
 S2189  
 S2330  
 S2379  
 S2279  
 S2718  
 S2765  
 S2510  
 S2333  
 S2408  
 S2508  
 S2667  
 S2400  
 S2216  
 S2391

Type  
 mRNA\_Expr  
 CopyNum  
 AmpDel

# FMN1

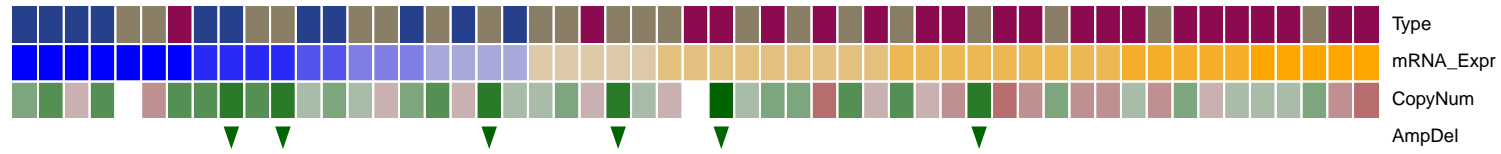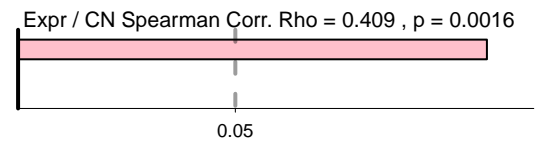

15 : 33487631  
 15 : 33487289  
 15 : 33484389  
 15 : 33424752  
 15 : 33421010  
 15 : 33420912  
 15 : 33420844  
 15 : 33418895  
 15 : 33406111  
 15 : 33397692  
 15 : 33390828  
 15 : 33384751  
 15 : 33375765  
 15 : 33360901  
 15 : 33360485  
 15 : 33360353  
 15 : 33360271  
 15 : 33360262  
 15 : 33360214  
 15 : 33360195  
 15 : 33359788  
 15 : 33320928  
 15 : 33311980  
 15 : 33311906  
 15 : 33311738  
 15 : 33307322  
 15 : 33300472  
 15 : 33278159  
 15 : 33266926  
 15 : 33259575  
 15 : 33251279  
 15 : 33245281  
 15 : 33235802  
 15 : 33220732  
 15 : 33211107  
 15 : 33200866  
 15 : 33191698  
 15 : 33178652  
 15 : 33171339  
 15 : 33165563  
 15 : 33162876  
 15 : 33154262  
 15 : 33148913  
 15 : 33143407  
 15 : 33131642  
 15 : 33111288  
 15 : 33080435

GeneLoc  
 PromoterAssoc  
 CpIsland

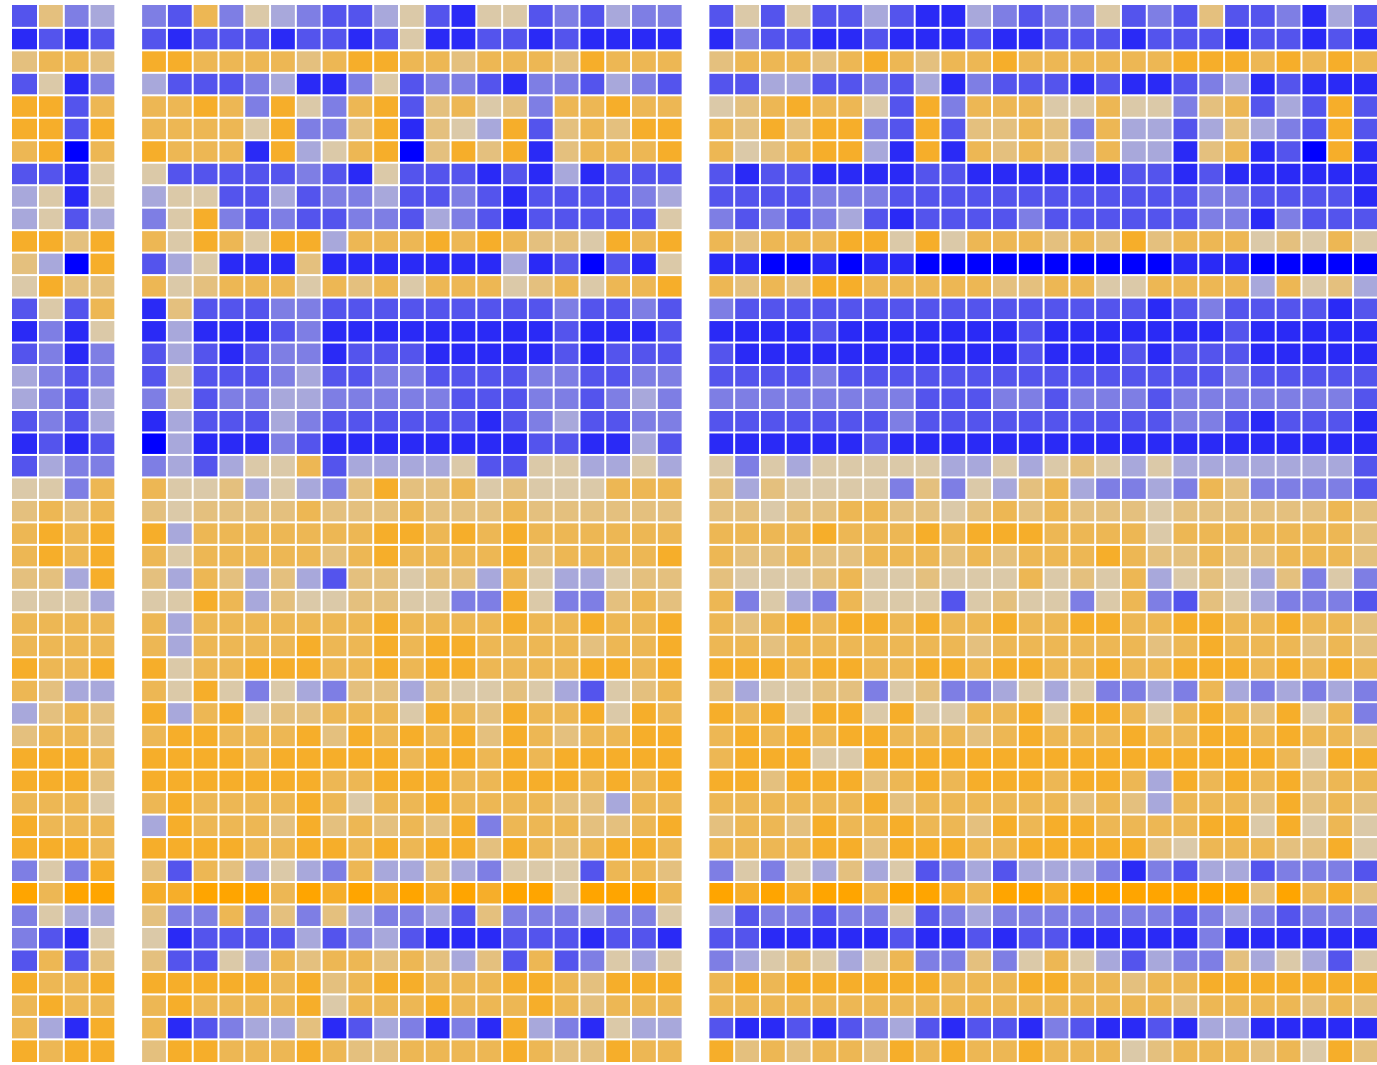

cg11775292  
 cg09155362  
 cg21610069  
 cg16710604  
 cg25958733  
 cg02255242  
 cg13715254  
 cg25898192  
 cg22162638  
 cg21177494  
 cg10669834  
 cg02025737  
 cg19254691  
 cg19161424  
 cg05115375  
 cg17454592  
 cg09347959  
 cg15175581  
 cg19599407  
 cg19635897  
 cg24225467  
 cg26779147  
 cg22810196  
 cg18531962  
 cg10481328  
 cg13619277  
 cg16283287  
 cg01245965  
 cg12900489  
 cg27546349  
 cg15612077  
 cg01771462  
 cg11787822  
 cg11199182  
 cg24874277  
 cg07500806  
 cg27224881  
 cg06778266  
 cg20827077  
 cg09667289  
 cg10006817  
 cg25493948  
 cg16146288  
 cg14161369  
 cg13543254  
 cg24781973  
 cg17137426

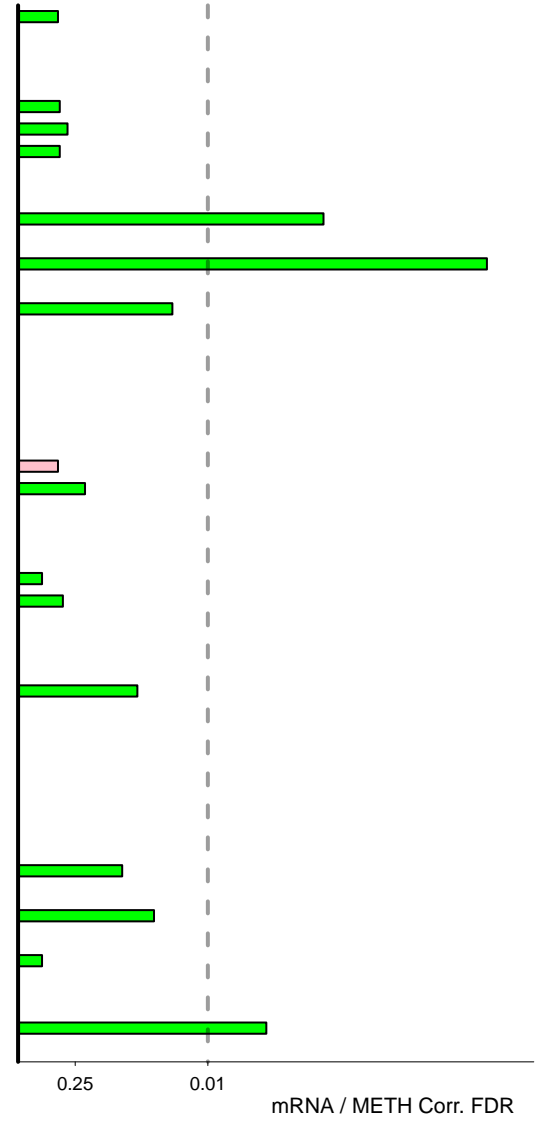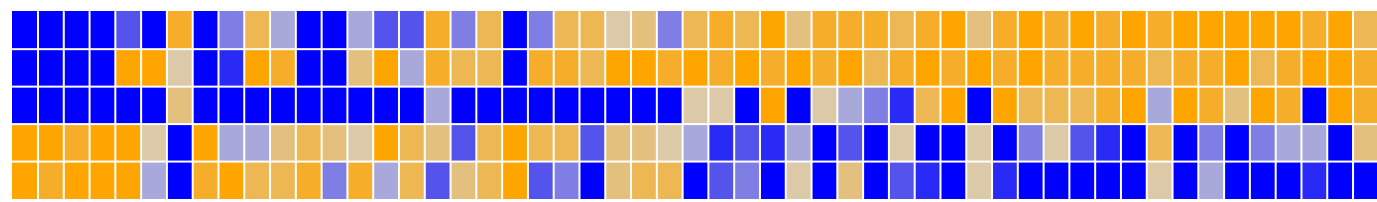

MITF  
 SOX10  
 TRPM1  
 ZEB1  
 AXL

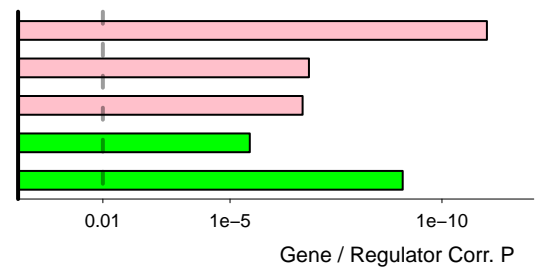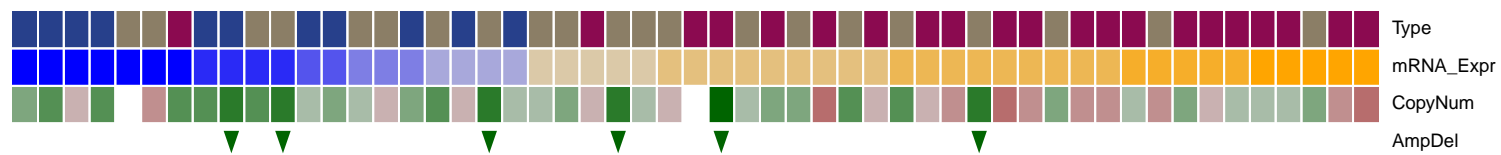

S2125  
 S2261  
 S2688  
 S2770A  
 S2350  
 S2549  
 S2357  
 S2470  
 S2731  
 S2410  
 S2650  
 S2338  
 S2686  
 S2800  
 S2495  
 S2583  
 S2247  
 S2405  
 S2423  
 S2356  
 S2645  
 S2380  
 S2761  
 S2365  
 S2153  
 S2654  
 S2667  
 S2668  
 S2392  
 S2521  
 S2812  
 S2189  
 S2097  
 S2373  
 S2333  
 S2508  
 S2374  
 S2767  
 S2330  
 S2718  
 S2596  
 S2406  
 S2510  
 S2408  
 S2381  
 S2391  
 S2320  
 S2279  
 S2765  
 S2216  
 S2734  
 S2400  
 S2379

Type  
 mRNA\_Expr  
 CopyNum  
 AmpDel

# P2RX7

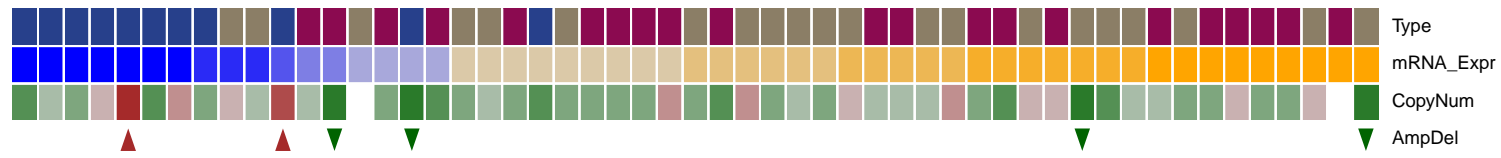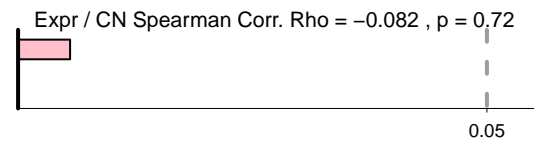

12 : 121569924  
 12 : 121569969  
 12 : 121570081  
 12 : 121570571  
 12 : 121570616  
 12 : 121570677  
 12 : 121570752  
 12 : 121582875  
 12 : 121593365

GeneLoc  
 PromoterAssoc  
 CpIsland

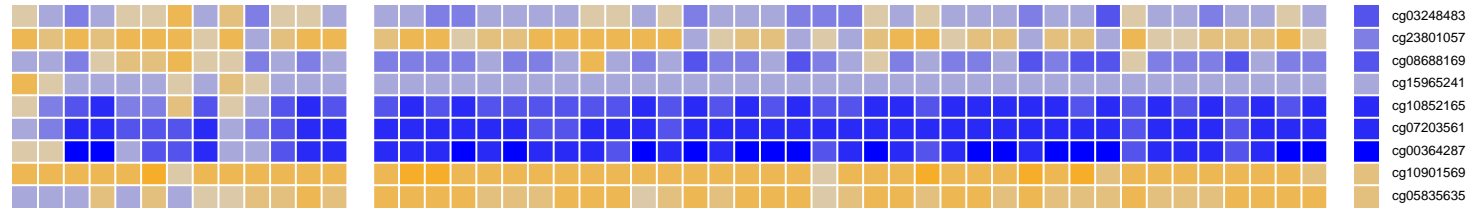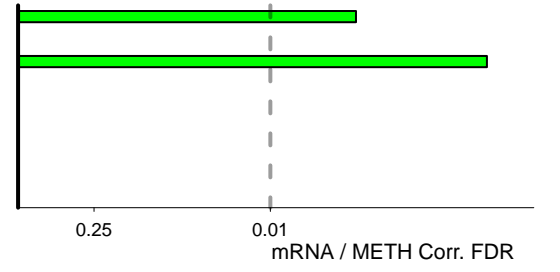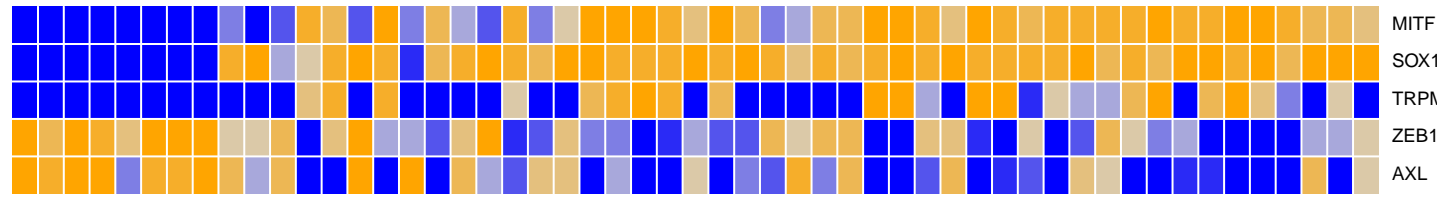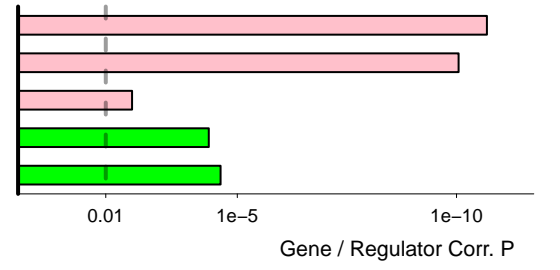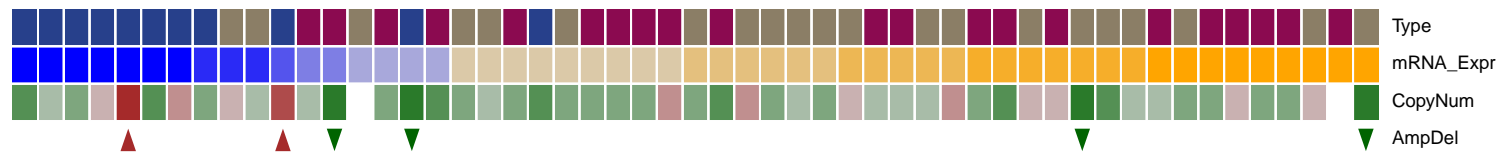

S2770A  
 S2338  
 S2356  
 S2688  
 S2686  
 S2261  
 S2470  
 S2125  
 S2654  
 S2549  
 S2583  
 S2357  
 S2379  
 S2350  
 S2216  
 S2731  
 S2761  
 S2650  
 S2495  
 S2668  
 S2405  
 S2365  
 S2718  
 S2320  
 S2374  
 S2510  
 S2812  
 S2406  
 S2392  
 S2645  
 S2800  
 S2380  
 S2423  
 S2400  
 S2247  
 S2153  
 S2521  
 S2330  
 S2333  
 S2189  
 S2097  
 S2381  
 S2596  
 S2765  
 S2734  
 S2508  
 S2391  
 S2279  
 S2373  
 S2410  
 S2667  
 S2767

# MBP

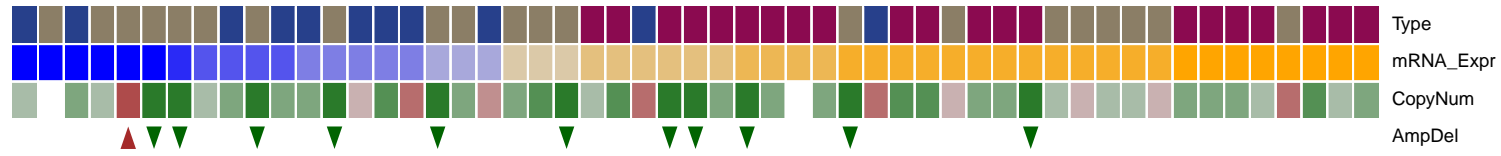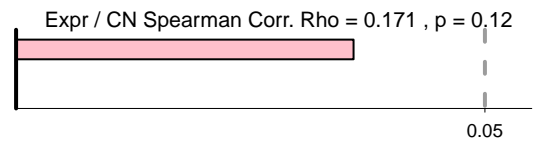

18 : 74845829  
 18 : 74845706  
 18 : 74845422  
 18 : 74845154  
 18 : 74844787  
 18 : 74844781  
 18 : 74844767  
 18 : 74844034  
 18 : 74844011  
 18 : 74844009  
 18 : 74843361  
 18 : 74843261  
 18 : 74840216  
 18 : 74836070  
 18 : 74832372  
 18 : 74832261  
 18 : 74832171  
 18 : 74830377  
 18 : 74828771  
 18 : 74826769  
 18 : 74825893  
 18 : 74824413  
 18 : 74824280  
 18 : 74824154  
 18 : 74822994  
 18 : 74806480  
 18 : 74805219  
 18 : 74804256  
 18 : 74804128  
 18 : 74802637  
 18 : 74801026  
 18 : 74800080  
 18 : 74800029  
 18 : 74799909  
 18 : 74799572  
 18 : 74799500  
 18 : 74799495  
 18 : 74799250  
 18 : 74798054  
 18 : 74796580  
 18 : 74774466  
 18 : 74770815  
 18 : 74770589  
 18 : 74770431  
 18 : 74770402  
 18 : 74768360  
 18 : 74768041  
 18 : 74732603  
 18 : 74729551  
 18 : 74729519  
 18 : 74729481  
 18 : 74729251  
 18 : 74729175  
 18 : 74729151  
 18 : 74729145  
 18 : 74729074  
 18 : 74729064  
 18 : 74729021  
 18 : 74728979  
 18 : 74728959  
 18 : 74728931  
 18 : 74728838  
 18 : 74728834  
 18 : 74726002  
 18 : 74695224  
 18 : 74692253  
 18 : 74692235  
 18 : 74692145  
 18 : 74692116  
 18 : 74691367  
 18 : 74691269

GeneLoc  
 PromoterAssoc  
 CpGIsland

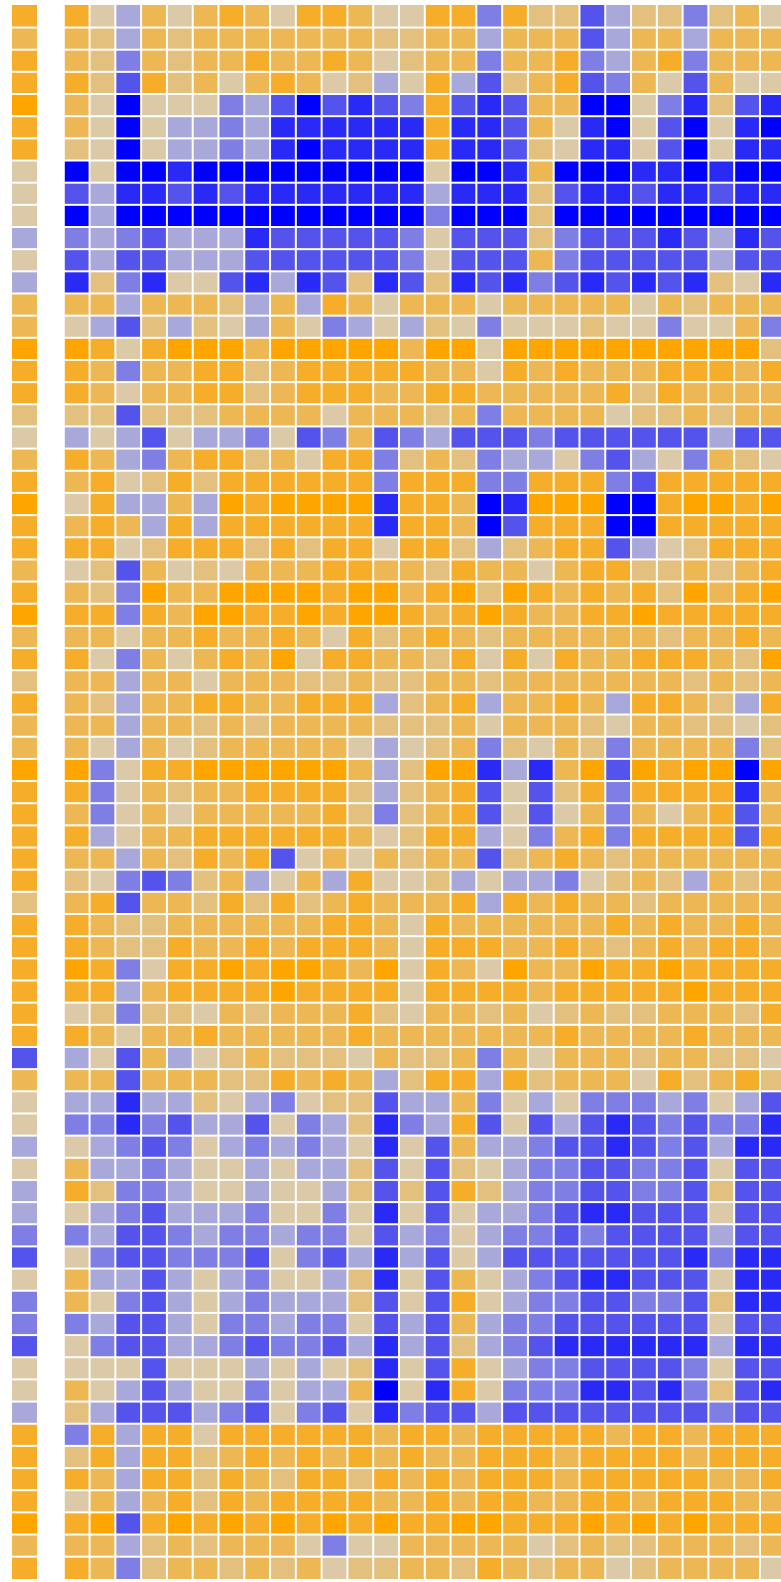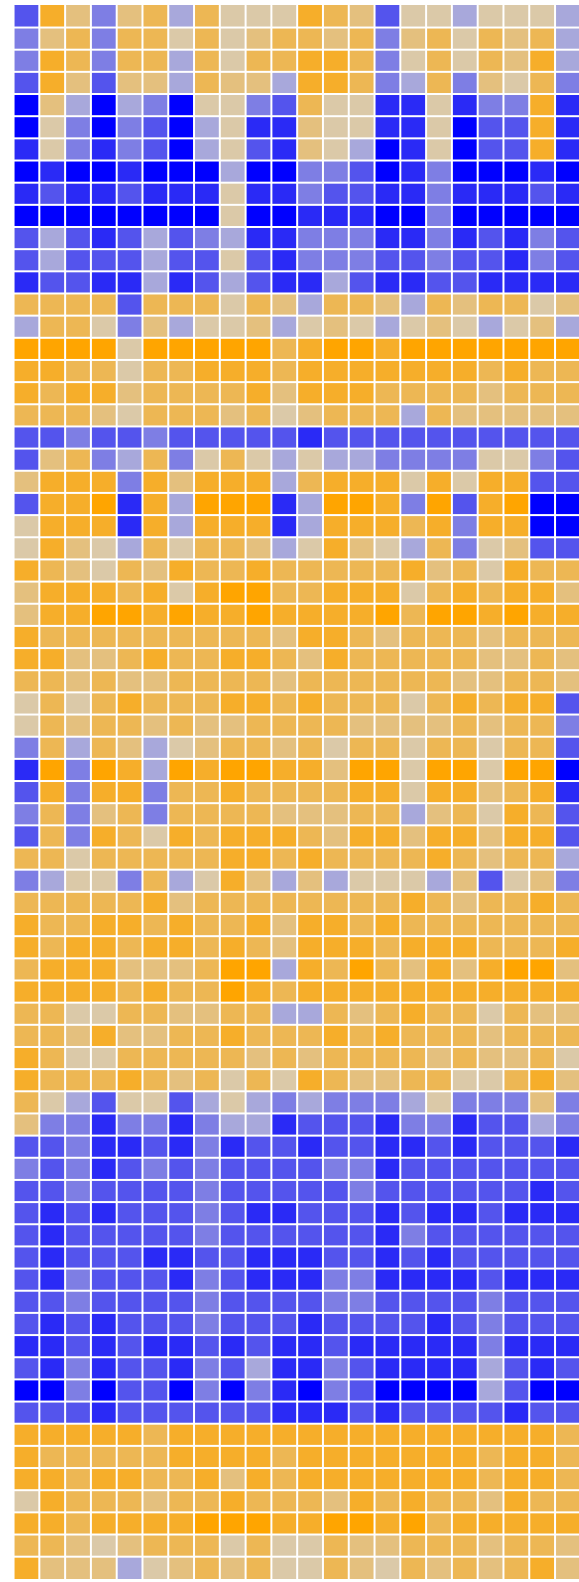

cg16604566  
 cg11984636  
 cg12555907  
 cg00366917  
 cg27180880  
 cg25887236  
 cg20801056  
 cg22228783  
 cg18362936  
 cg05616792  
 cg23529390  
 cg15462468  
 cg26457248  
 cg19310162  
 cg25332502  
 cg16990945  
 cg21116087  
 cg16893707  
 cg18206567  
 cg27262850  
 cg21261487  
 cg25389087  
 cg27400313  
 cg07637837  
 cg26358590  
 cg18792727  
 cg07165529  
 cg25743490  
 cg23319171  
 cg15521572  
 cg25786273  
 cg23470914  
 cg15407373  
 cg08737246  
 cg17266581  
 cg11598403  
 cg13572782  
 cg17199181  
 cg2446429  
 cg07184627  
 cg25503999  
 cg13852093  
 cg07006718  
 cg07807210  
 cg21655444  
 cg15566919  
 cg13583535  
 cg00735329  
 cg03560685  
 cg00187503  
 cg07611666  
 cg22239325  
 cg13141061  
 cg15495463  
 cg06548292  
 cg14298244  
 cg15224291  
 cg23327011  
 cg13442966  
 cg21107579  
 cg23975646  
 cg21322241  
 cg27240008  
 cg06773488  
 cg22168512  
 cg13375905  
 cg00839132  
 cg17061340  
 cg00706570  
 cg15352683  
 cg25916714

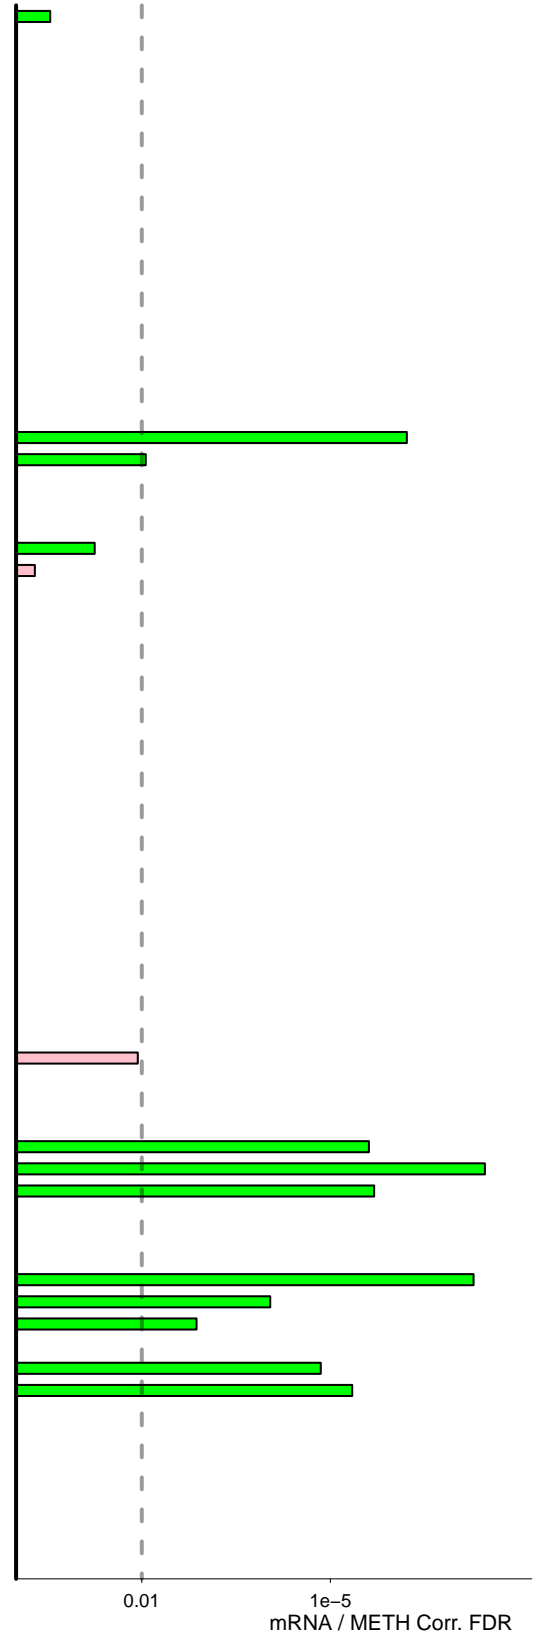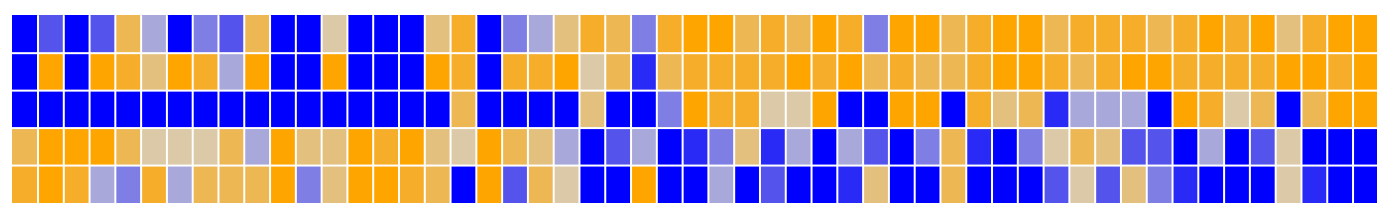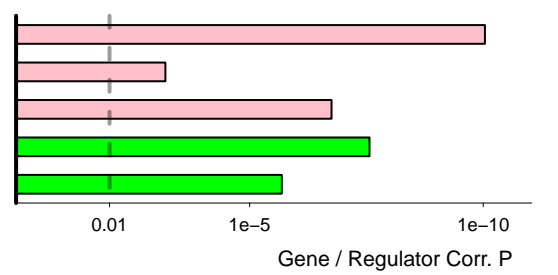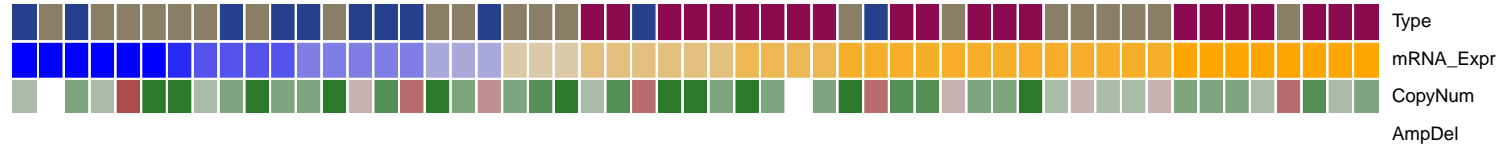

S2338  
 S2350  
 S2470  
 S2495  
 S2380  
 S2800  
 S2549  
 S2654  
 S2583  
 S2410  
 S2356  
 S2686  
 S2365  
 S2770A  
 S2688  
 S2261  
 S2153  
 S2596  
 S2125  
 S2645  
 S2650  
 S2812  
 S2357  
 S2761  
 S2731  
 S2373  
 S2521  
 S2320  
 S2379  
 S2668  
 S2667  
 S2408  
 S2734  
 S2405  
 S2374  
 S2765  
 S2423  
 S2510  
 S2279  
 S2718  
 S2333  
 S2381  
 S2247  
 S2097  
 S2392  
 S2330  
 S2216  
 S2189  
 S2406  
 S2767  
 S2508  
 S2391  
 S2400



# IVNS1ABP

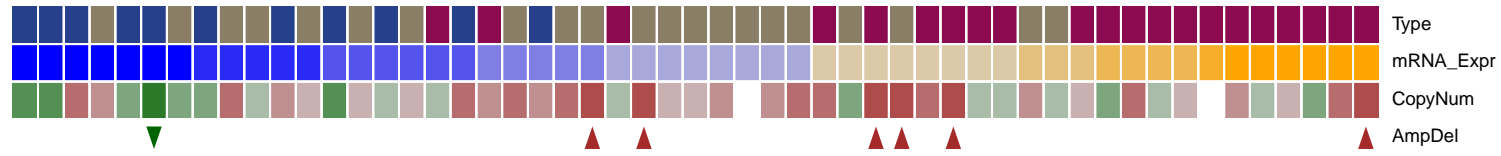

1: 185283071  
1: 185270682  
GeneLoc  
PromoterAssoc  
CpGIsland

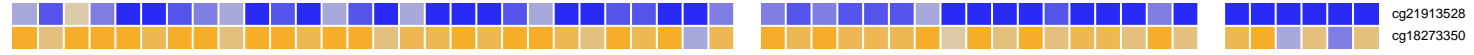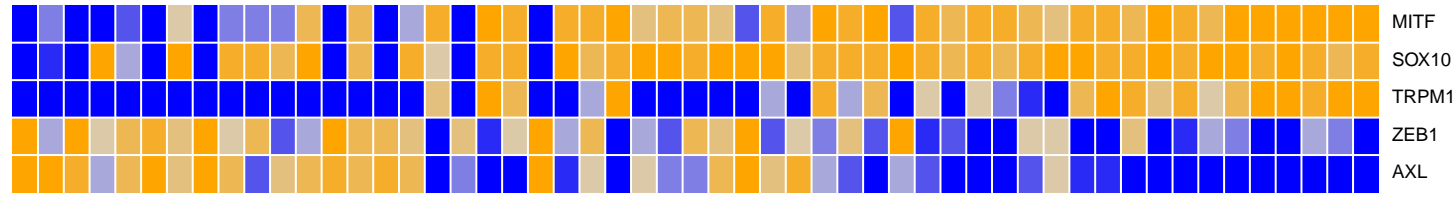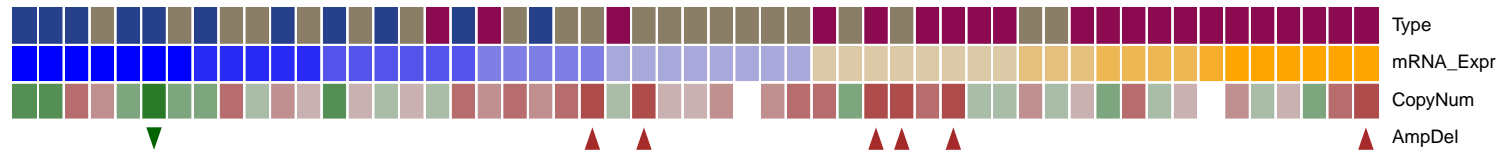

S2770A  
S2731  
S2261  
S2549  
S2583  
S2688  
S2365  
S2356  
S2654  
S2645  
S2405  
S2410  
S2470  
S2423  
S2338  
S2650  
S2357  
S2686  
S2521  
S2596  
S2125  
S2734  
S2381  
S2391  
S2812  
S2392  
S2380  
S2153  
S2350  
S2097  
S2800  
S2320  
S2247  
S2406  
S2495  
S2668  
S2761  
S2189  
S2373  
S2333  
S2767  
S2508  
S2330  
S2379  
S2279  
S2510  
S2667  
S2718  
S2408  
S2400  
S2216  
S2765  
S2374

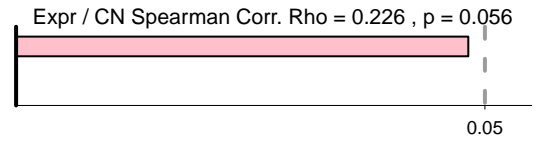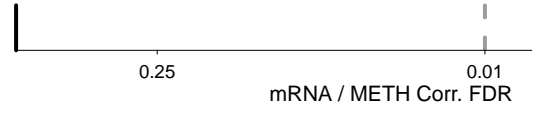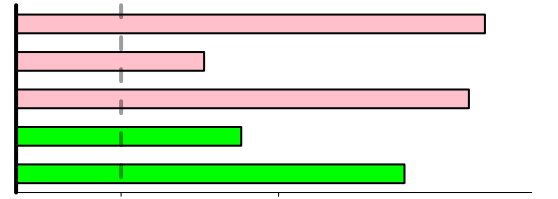

# SLC16A6

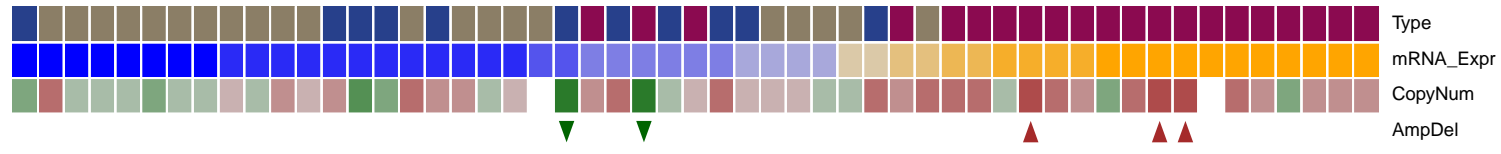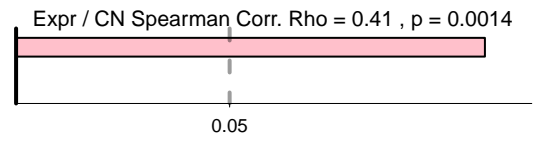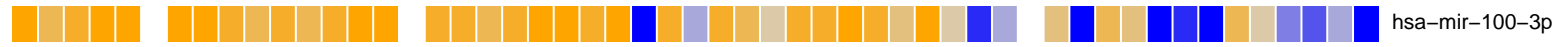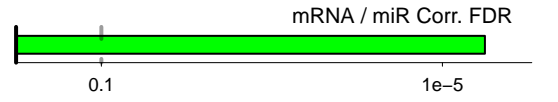

17 : 66288795  
 17 : 66288529  
 17 : 66287492  
 17 : 66287071  
 17 : 66287032  
 17 : 66286993  
 17 : 66286791  
 17 : 66286394  
 17 : 66286371  
 17 : 66286298  
 17 : 66283994  
 17 : 66270134

GeneLoc  
 PromoterAssoc  
 CpGIsland

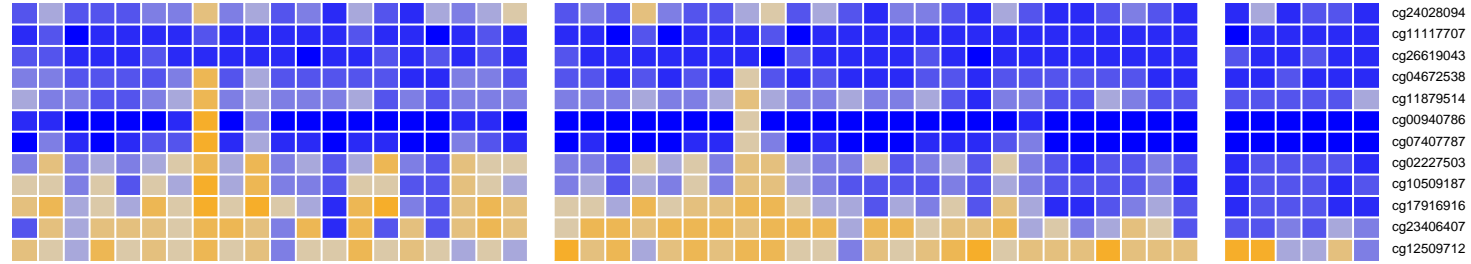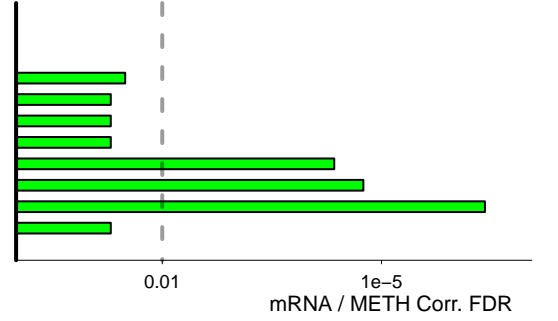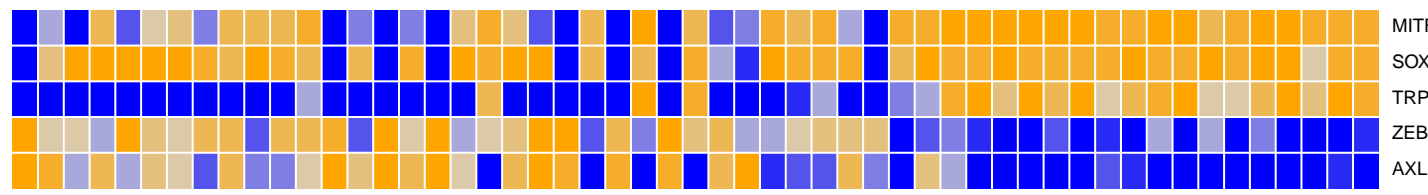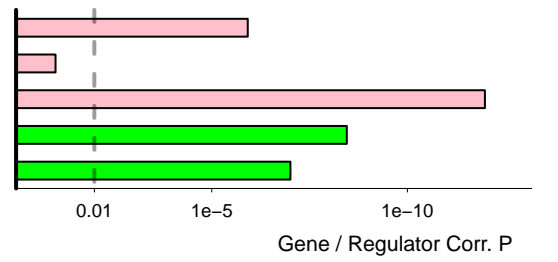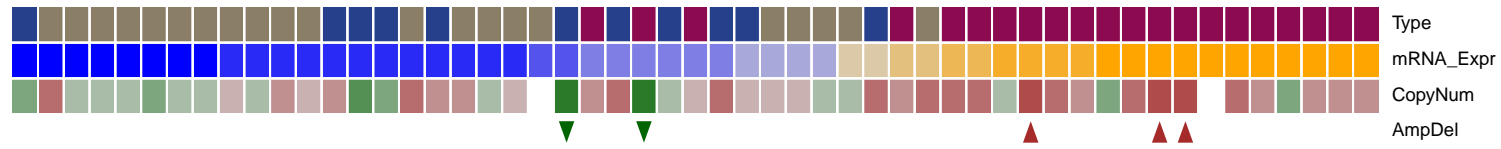

S2770A  
 S2800  
 S2549  
 S2410  
 S2495  
 S2365  
 S2767  
 S2645  
 S2423  
 S2392  
 S2380  
 S2381  
 S2688  
 S2405  
 S2356  
 S2654  
 S2125  
 S2812  
 S2596  
 S2153  
 S2350  
 S2470  
 S2761  
 S2338  
 S2765  
 S2261  
 S2379  
 S2583  
 S2731  
 S2734  
 S2333  
 S2247  
 S2650  
 S2686  
 S2373  
 S2097  
 S2320  
 S2521  
 S2279  
 S2391  
 S2406  
 S2374  
 S2668  
 S2508  
 S2216  
 S2408  
 S2667  
 S2189  
 S2718  
 S2400  
 S2357  
 S2330  
 S2510

# MYEF2

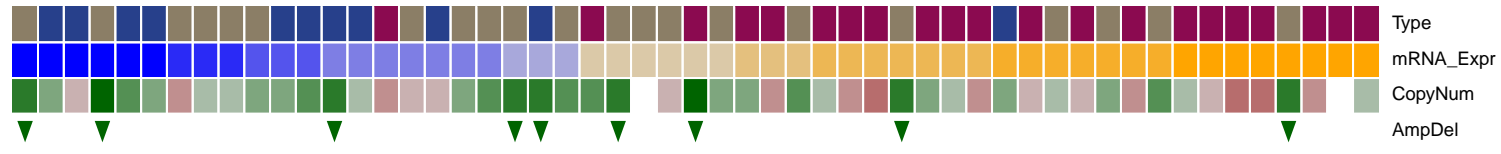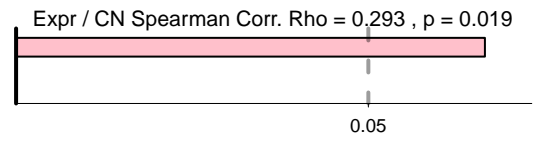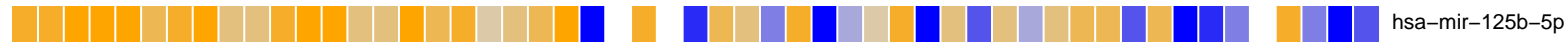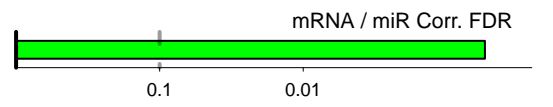

- 15 : 48470973
- 15 : 48470794
- 15 : 48470754
- 15 : 48470678
- 15 : 48470516
- 15 : 48470321
- 15 : 48469952
- 15 : 48442242

GeneLoc  
PromoterAssoc  
CpIsland

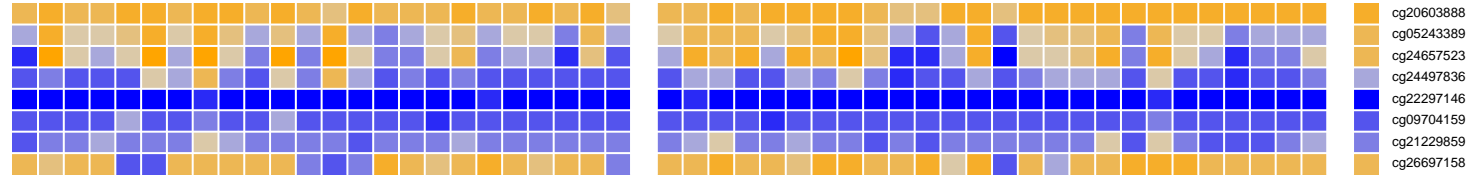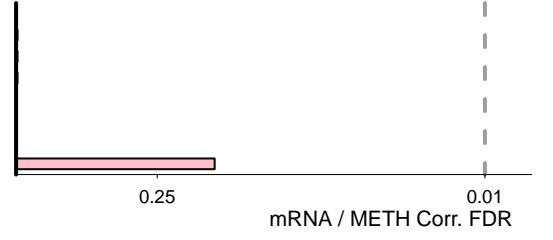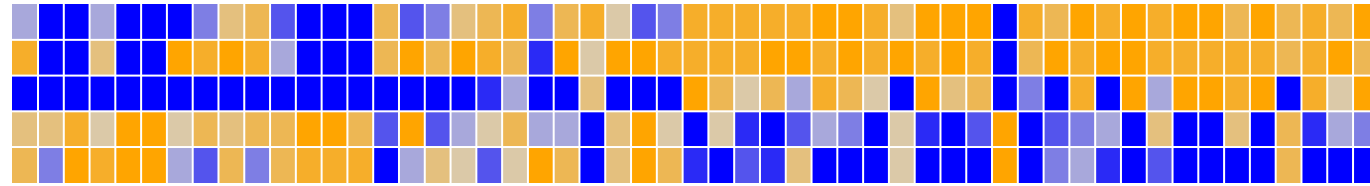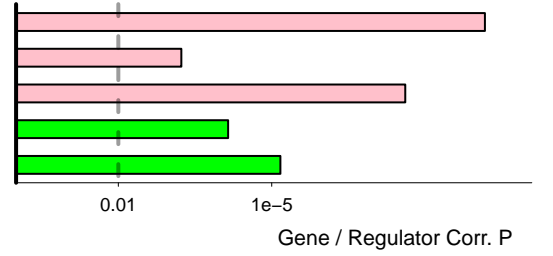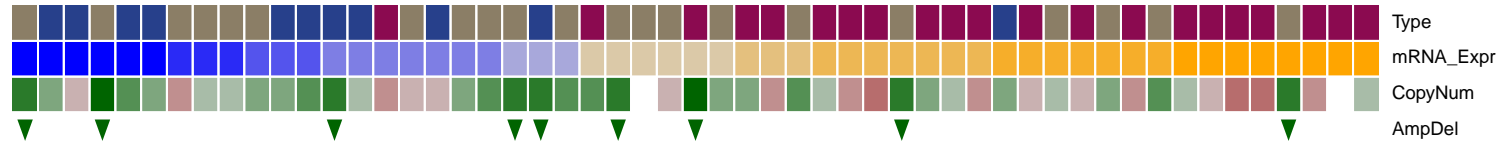

- S2650
- S2686
- S2688
- S2800
- S2770A
- S2356
- S2549
- S2645
- S2153
- S2380
- S2583
- S2261
- S2470
- S2338
- S2761
- S2495
- S2405
- S2812
- S2333
- S2381
- S2731
- S2410
- S2357
- S2365
- S2350
- S2654
- S2330
- S2596
- S2668
- S2508
- S2097
- S2216
- S2718
- S2189
- S2767
- S2521
- S2279
- S2406
- S2125
- S2373
- S2392
- S2320
- S2734
- S2400
- S2247
- S2408
- S2374
- S2379
- S2391
- S2423
- S2510
- S2667
- S2765

# CYP27A1

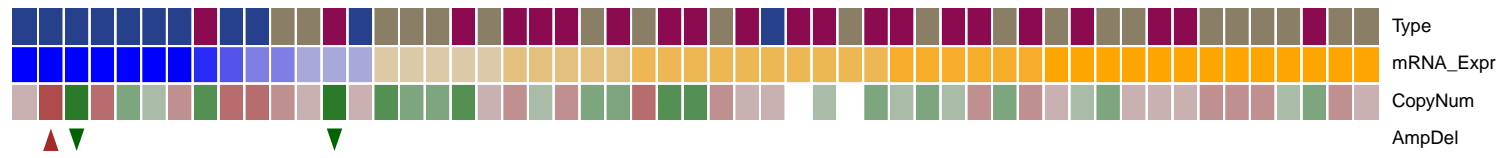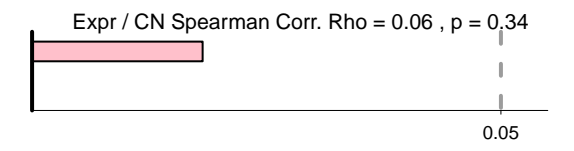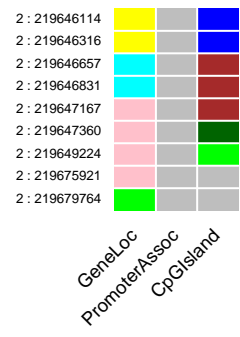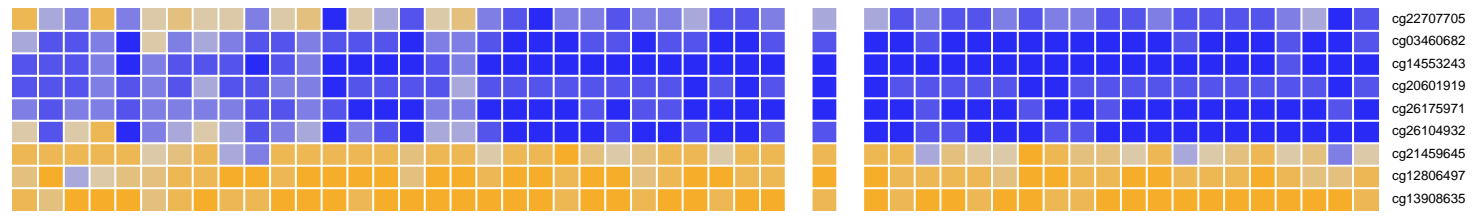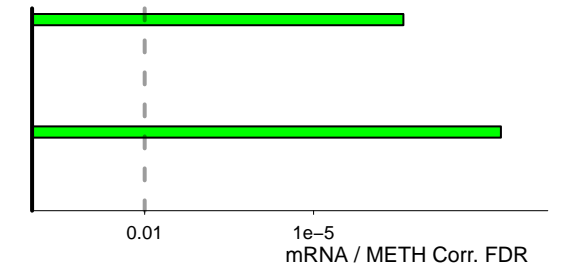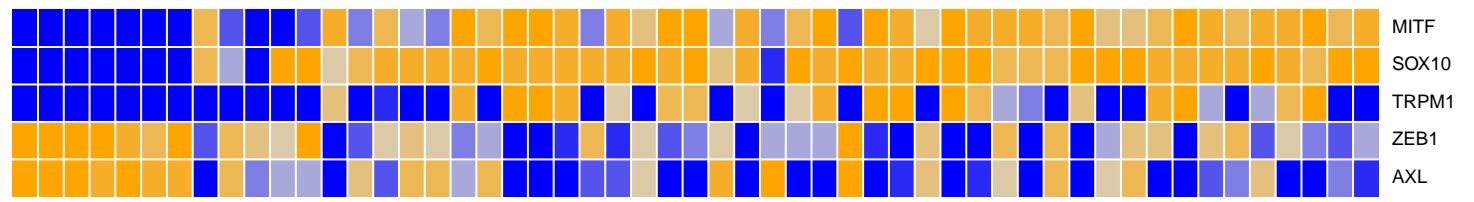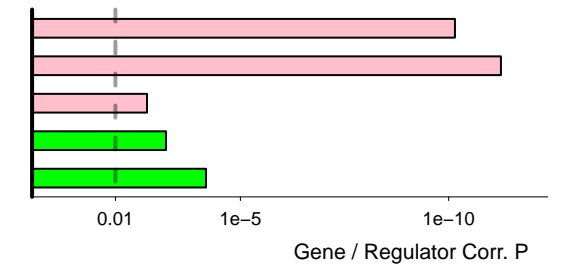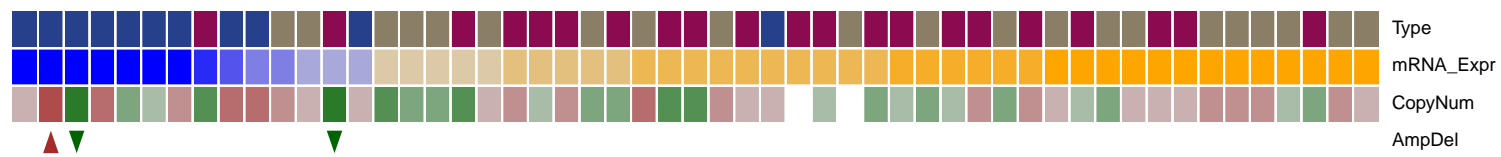

S2770A  
S2356  
S2125  
S2470  
S2688  
S2338  
S2261  
S2761  
S2583  
S2686  
S2549  
S2495  
S2357  
S2405  
S2333  
S2650  
S2654  
S2320  
S2410  
S2374  
S2408  
S2510  
S2645  
S2668  
S2767  
S2406  
S2718  
S2800  
S2189  
S2731  
S2667  
S2216  
S2350  
S2521  
S2330  
S2365  
S2400  
S2508  
S2381  
S2373  
S2423  
S2279  
S2812  
S2153  
S2379  
S2391  
S2247  
S2380  
S2097  
S2596  
S2765  
S2392  
S2734

# SLC7A5

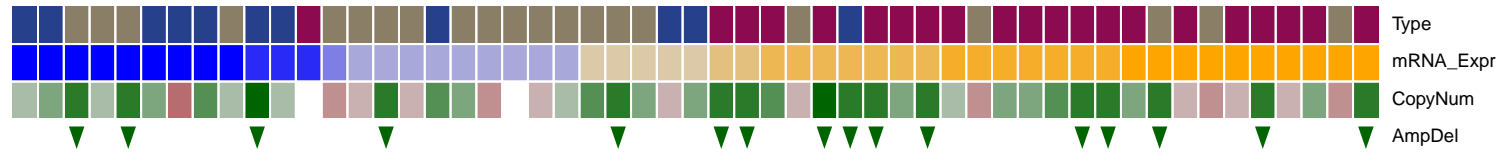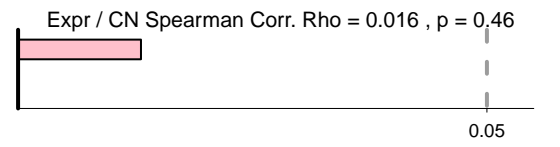

16 : 87904580  
16 : 87904547  
16 : 87904491  
16 : 87903671  
16 : 87903292  
16 : 87903283  
16 : 87899784  
16 : 87898191  
16 : 87894690  
16 : 87894565  
16 : 87894491  
16 : 87890567  
16 : 87887504  
16 : 87887443  
16 : 87887331  
16 : 87886933  
16 : 87886902  
16 : 87886871  
16 : 87885387  
16 : 87885301  
16 : 87885208  
16 : 87879698  
16 : 87879581  
16 : 87879502  
16 : 87878292  
16 : 87877848  
16 : 87877300  
16 : 87874279  
16 : 87873837  
16 : 87873389  
16 : 87871219  
16 : 87871160  
16 : 87869786  
16 : 87869757  
16 : 87868947  
16 : 87868065  
16 : 87868000  
16 : 87864826  
16 : 87864431  
16 : 87863856  
16 : 87863812  
16 : 87863785

GeneLoc  
PromoterAssoc  
CpGIsland

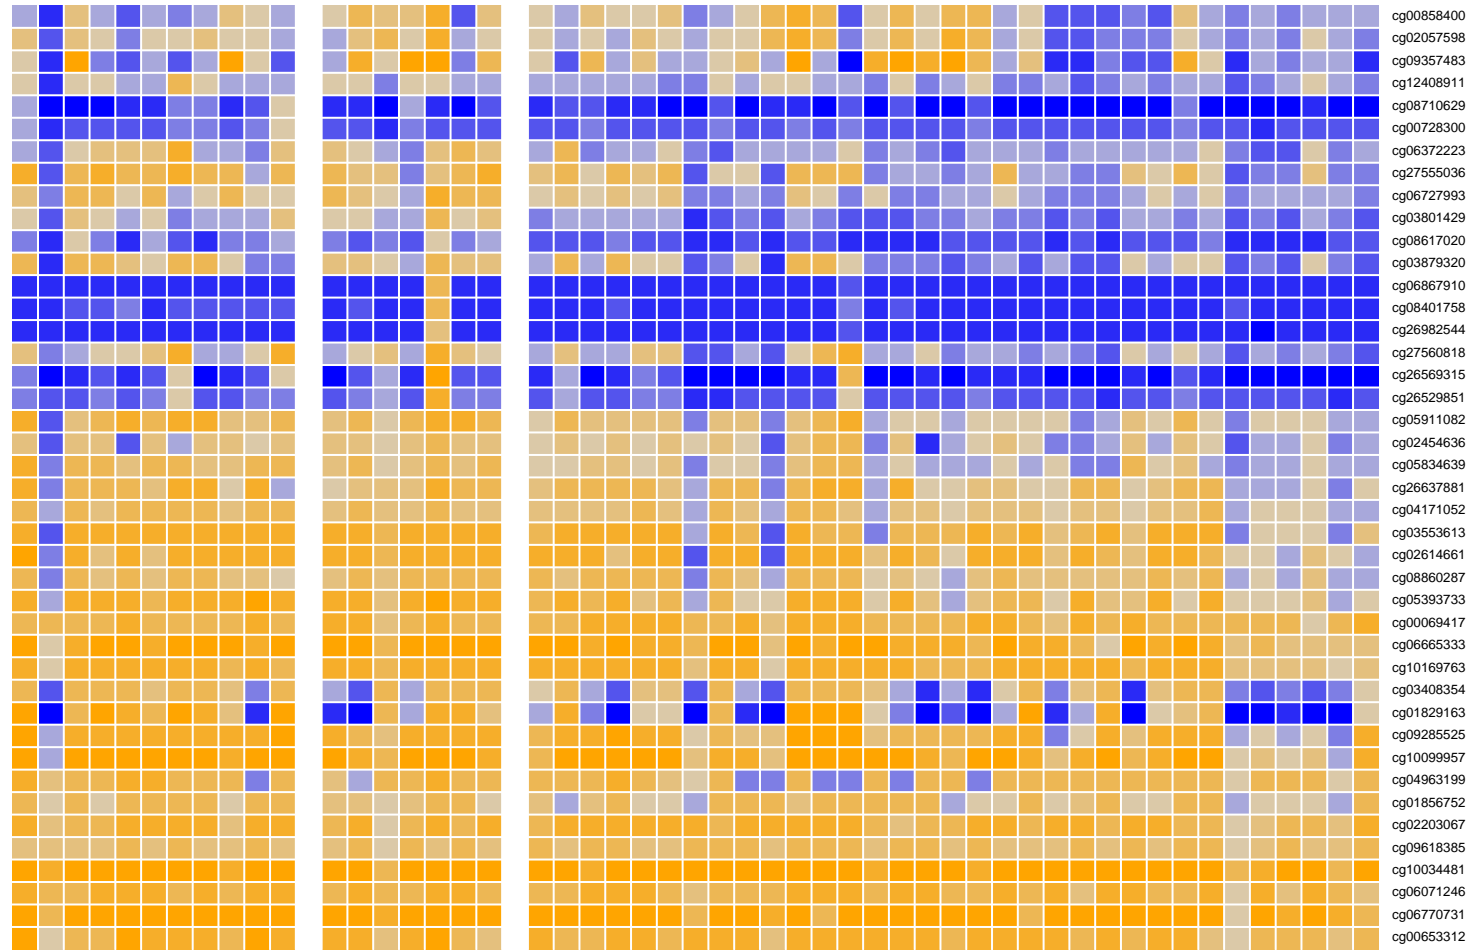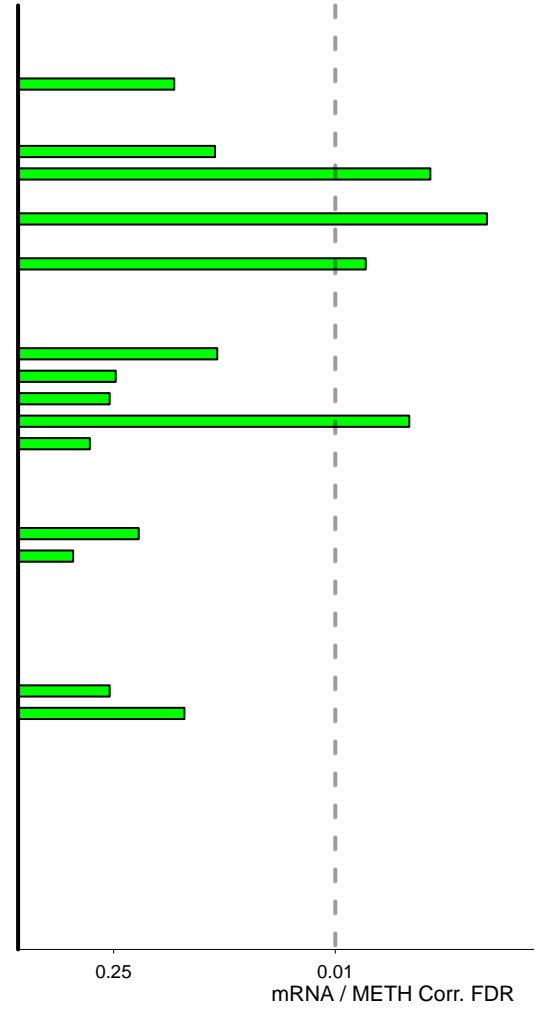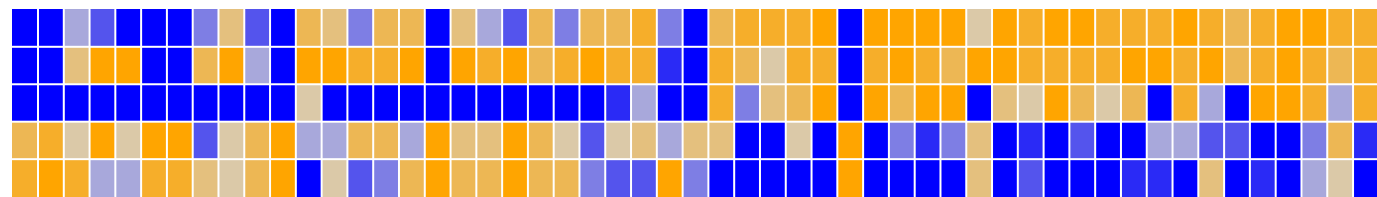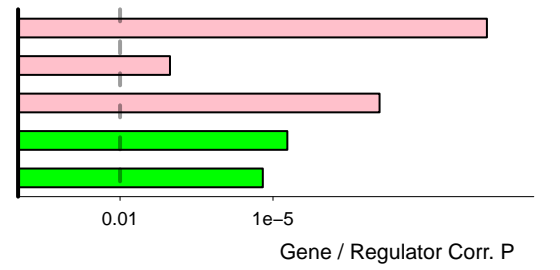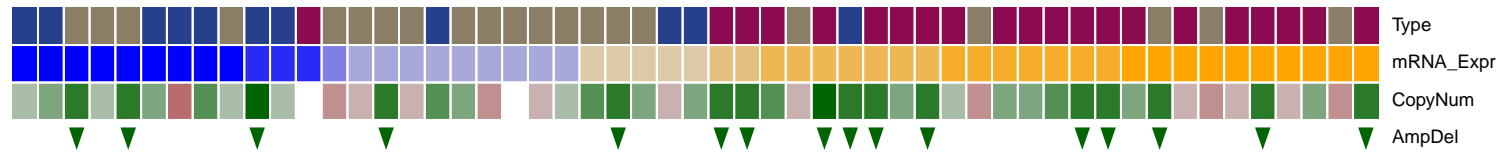

S2338  
S2688  
S2800  
S2495  
S2549  
S2261  
S2405  
S2767  
S2583  
S2356  
S2667  
S2812  
S2645  
S2380  
S2410  
S2770A  
S2153  
S2650  
S2350  
S2423  
S2654  
S2392  
S2333  
S2247  
S2731  
S2686  
S2379  
S2373  
S2357  
S2596  
S2408  
S2125  
S2391  
S2718  
S2521  
S2765  
S2365  
S2279  
S2668  
S2374  
S2406  
S2189  
S2508  
S2734  
S2216  
S2097  
S2761  
S2330  
S2400  
S2320  
S2381  
S2510

# PLXNC1

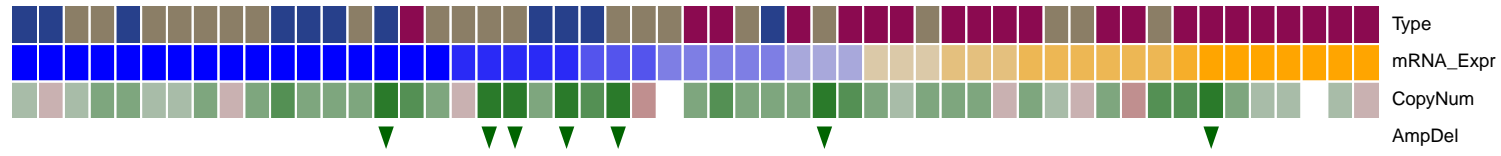

12:94541943  
12:94541990  
12:94542156  
12:94543449  
12:94543560  
12:94543680  
12:94543764  
12:94543978  
12:94544425  
12:94546933  
12:94559051  
12:94565092  
12:94566784  
12:94577837  
12:94580329  
12:94580426  
12:94580657  
12:94580931  
12:94619636  
12:94624709  
12:94640673  
12:94648646  
12:94655935  
12:94658675  
12:94660675  
12:94670294  
12:94676545  
12:94676688  
12:94683151  
12:94699141

GeneLoc  
PromoterAssoc  
CpGIsland

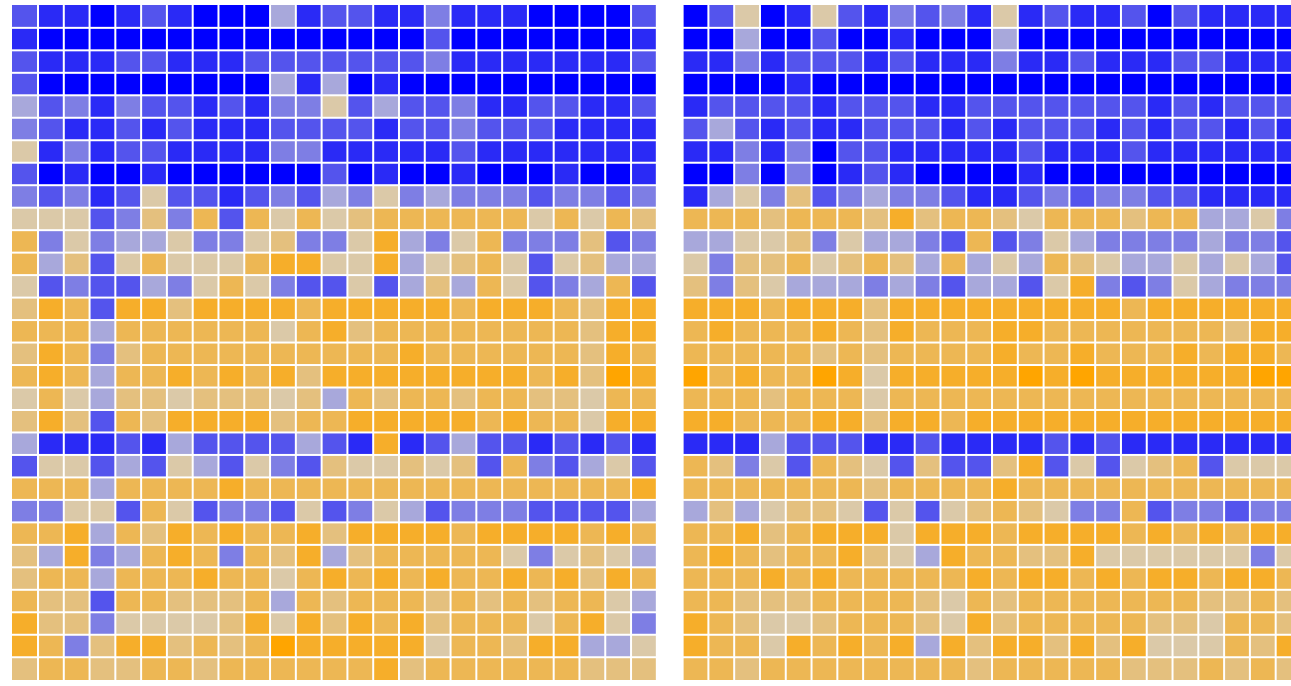

cg04048411  
cg01414289  
cg13488680  
cg13565656  
cg22793136  
cg07526042  
cg10851683  
cg21380341  
cg13085980  
cg02757998  
cg09366587  
cg00020799  
cg26514961  
cg05136471  
cg15400997  
cg12503473  
cg09625259  
cg07533511  
cg06595153  
cg17127146  
cg00631877  
cg22433914  
cg04199354  
cg08077234  
cg19118072  
cg23347790  
cg10118167  
cg04822495  
cg19427600  
cg07200939

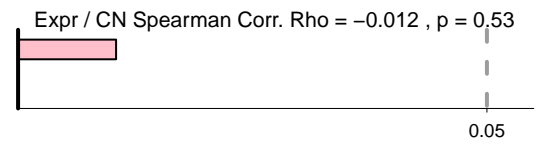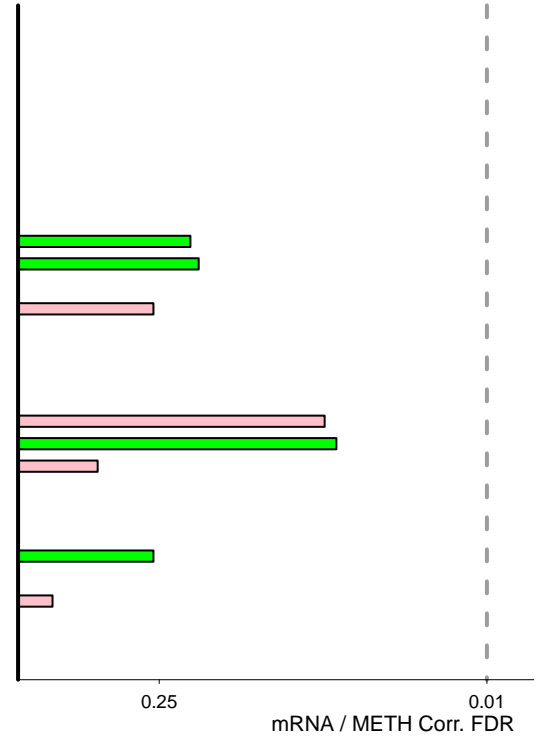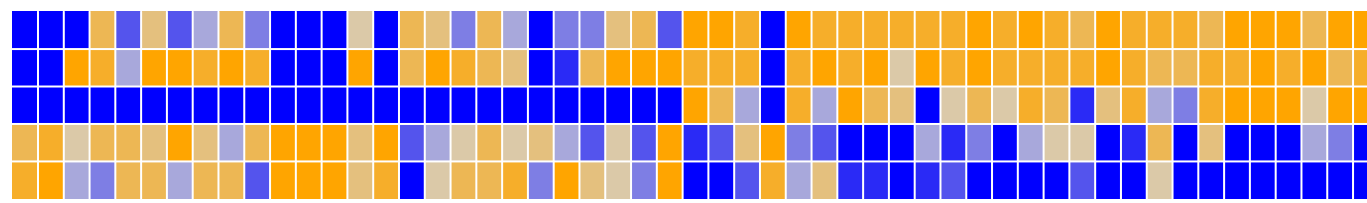

MITF  
SOX10  
TRPM1  
ZEB1  
AXL

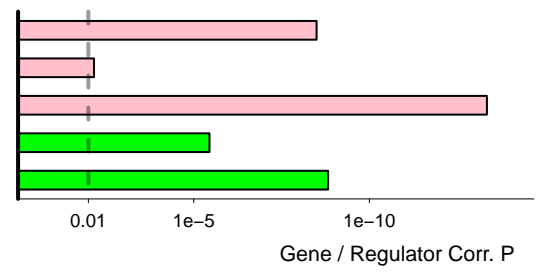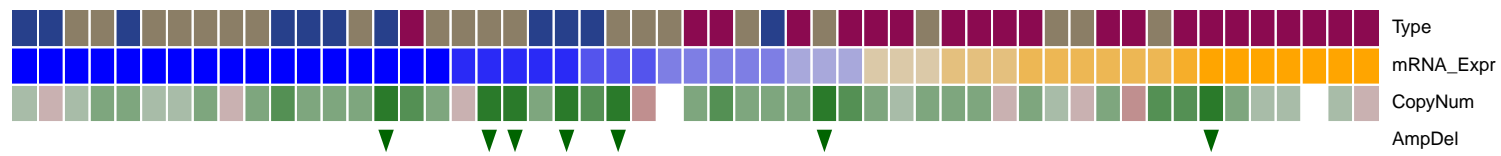

S2338  
S2688  
S2549  
S2380  
S2583  
S2153  
S2495  
S2650  
S2410  
S2645  
S2770A  
S2356  
S2125  
S2365  
S2470  
S2761  
S2812  
S2654  
S2423  
S2800  
S2686  
S2731  
S2405  
S2767  
S2392  
S2350  
S2521  
S2406  
S2247  
S2261  
S2320  
S2097  
S2330  
S2508  
S2357  
S2734  
S2668  
S2718  
S2189  
S2216  
S2596  
S2333  
S2279  
S2510  
S2381  
S2373  
S2379  
S2374  
S2400  
S2408  
S2667  
S2765  
S2391

Type  
mRNA\_Expr  
CopyNum  
AmpDel

# BCL2A1

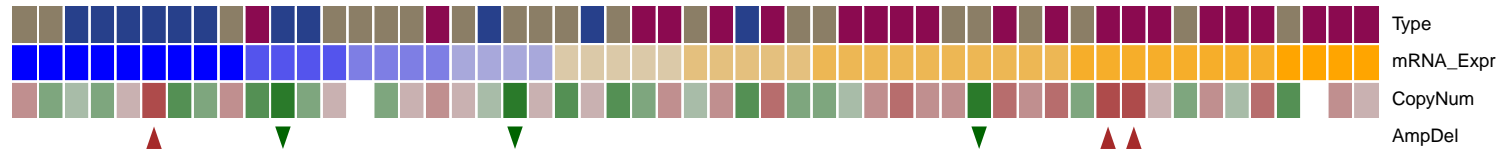

15:80264770  
 15:80264696  
 15:80263132  
 15:80260753

GeneLoc  
 PromoterAssoc  
 CpGIsland

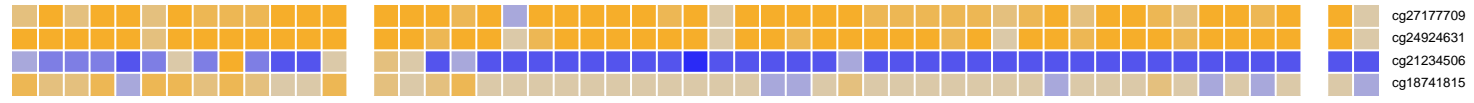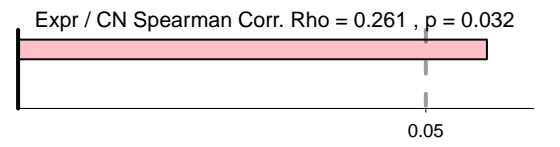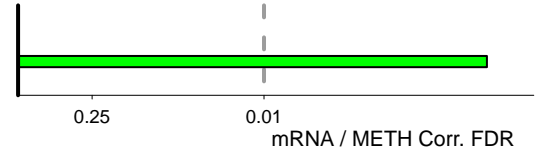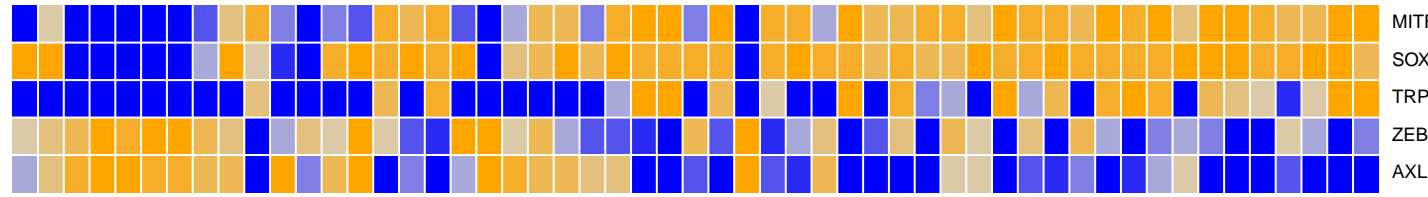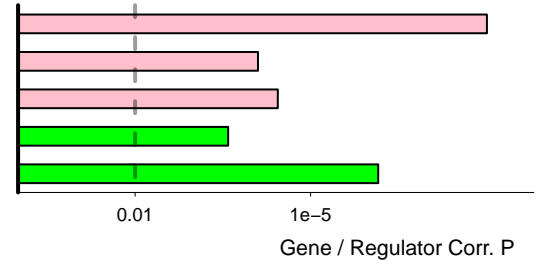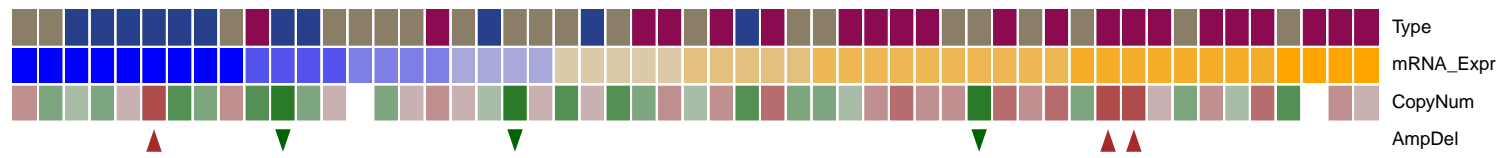

S2549  
 S2365  
 S2338  
 S2125  
 S2688  
 S2470  
 S2261  
 S2583  
 S2153  
 S2357  
 S2731  
 S2686  
 S2654  
 S2350  
 S2596  
 S2392  
 S2510  
 S2495  
 S2356  
 S2800  
 S2423  
 S2410  
 S2405  
 S2097  
 S2521  
 S2374  
 S2645  
 S2406  
 S2770A  
 S2668  
 S2734  
 S2650  
 S2408  
 S2761  
 S2379  
 S2373  
 S2381  
 S2767  
 S2391  
 S2247  
 S2508  
 S2380  
 S2216  
 S2330  
 S2320  
 S2812  
 S2718  
 S2279  
 S2189  
 S2333  
 S2667  
 S2400  
 S2765

# SNCA

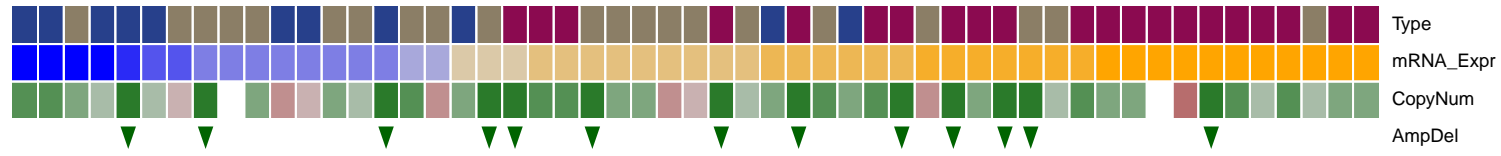

4: 90759203  
 4: 90759046  
 4: 90758797  
 4: 90758406  
 4: 90758216  
 4: 90758120  
 4: 90757452  
 4: 90757398  
 4: 90757378  
 4: 90757351  
 4: 90757139  
 4: 90756533  
 4: 90647041

GeneLoc  
 PromoterAssoc  
 CpGIsland

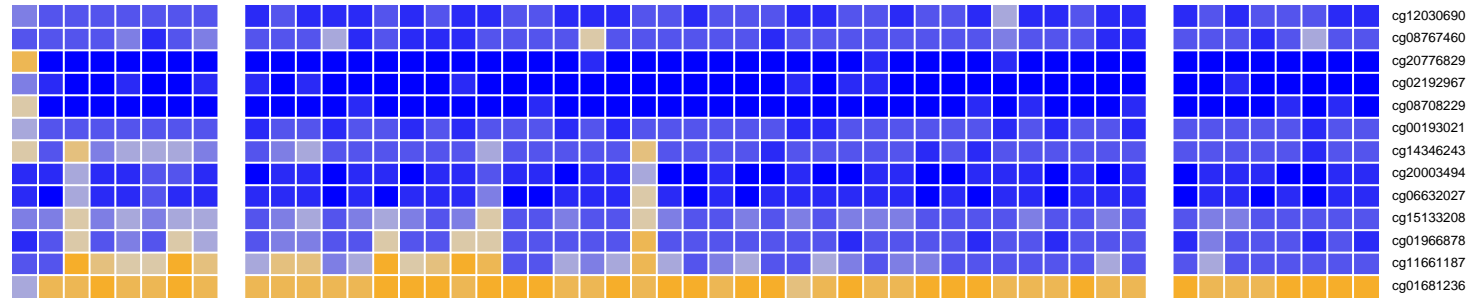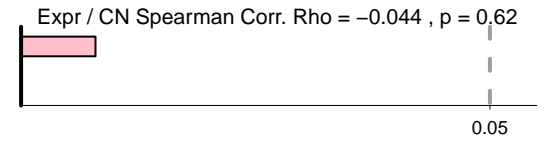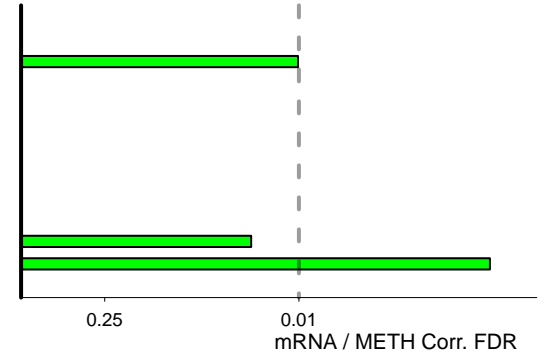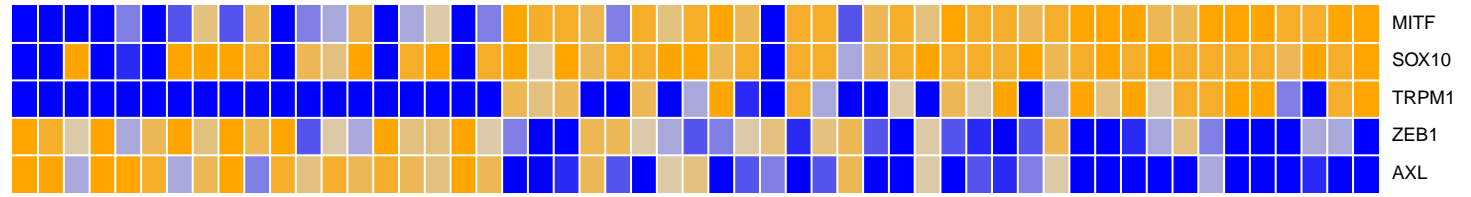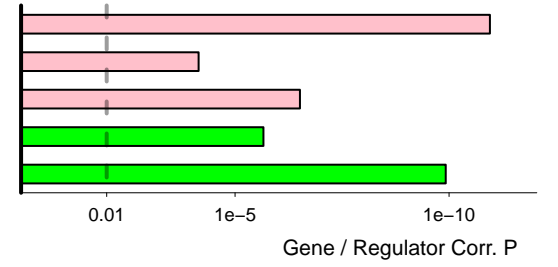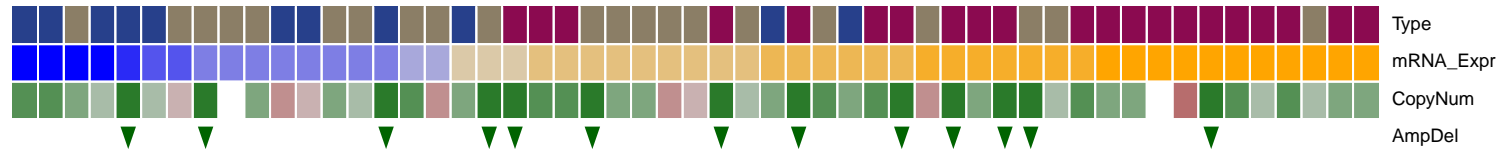

S2770A  
 S2688  
 S2549  
 S2125  
 S2731  
 S2338  
 S2495  
 S2153  
 S2350  
 S2380  
 S2261  
 S2405  
 S2800  
 S2410  
 S2470  
 S2650  
 S2365  
 S2356  
 S2654  
 S2718  
 S2357  
 S2508  
 S2423  
 S2645  
 S2596  
 S2812  
 S2097  
 S2765  
 S2333  
 S2686  
 S2510  
 S2247  
 S2583  
 S2761  
 S2189  
 S2767  
 S2406  
 S2668  
 S2330  
 S2392  
 S2381  
 S2391  
 S2279  
 S2521  
 S2667  
 S2379  
 S2320  
 S2374  
 S2408  
 S2373  
 S2734  
 S2216  
 S2400



# BIRC7

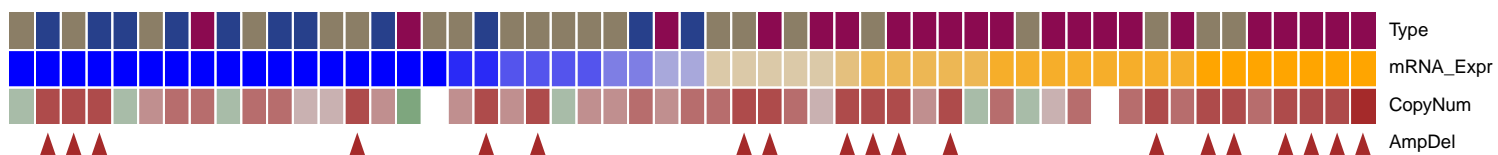

20:61866902  
20:61866960  
20:61867137  
20:61867154  
20:61867178  
20:61867205  
20:61867212  
20:61867218  
20:61867349  
20:61867533  
20:61871027  
20:61871067

GeneLoc  
PromoterAssoc  
CpGIsland

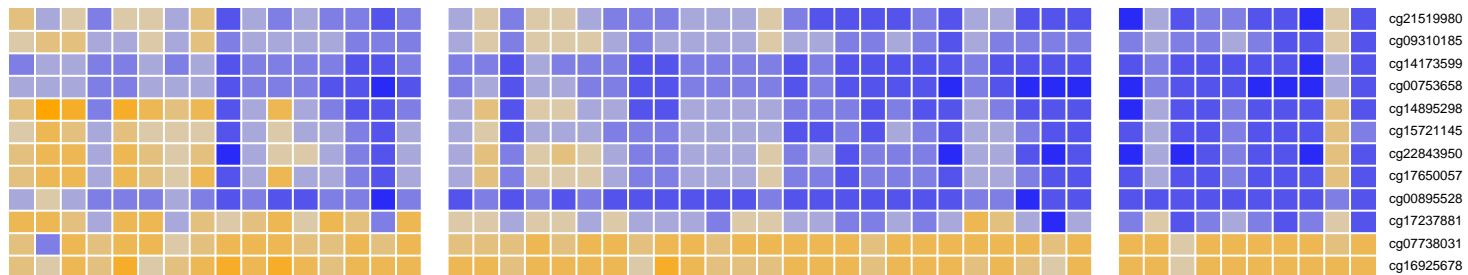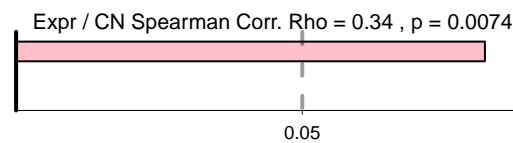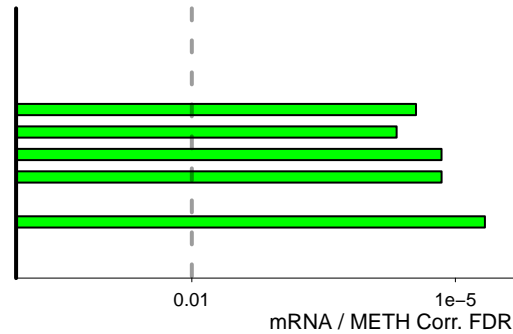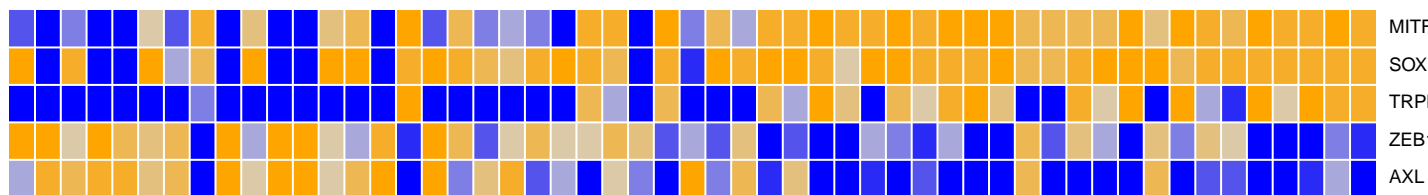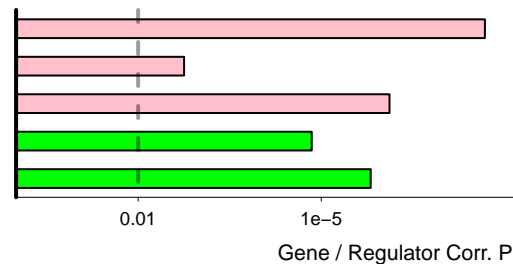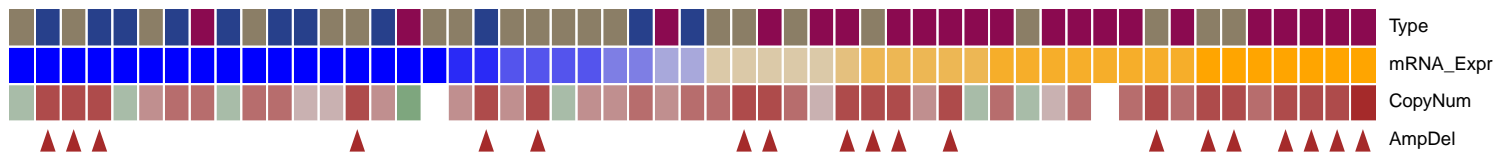

S2495  
S2470  
S2654  
S2261  
S2338  
S2365  
S2583  
S2373  
S2356  
S2812  
S2770A  
S2125  
S2767  
S2410  
S2688  
S2521  
S2350  
S2380  
S2405  
S2800  
S2645  
S2549  
S2596  
S2381  
S2686  
S2406  
S2731  
S2392  
S2650  
S2508  
S2097  
S2391  
S2357  
S2734  
S2718  
S2668  
S2216  
S2408  
S2279  
S2423  
S2761  
S2379  
S2667  
S2400  
S2153  
S2765  
S2247  
S2333  
S2374  
S2189  
S2330  
S2320  
S2510

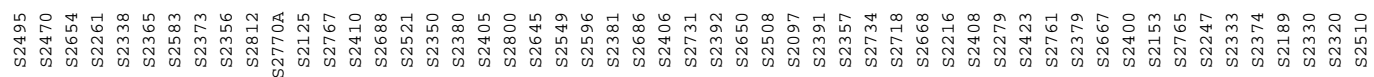

Gene / Regulator Corr. P

# MFSD12

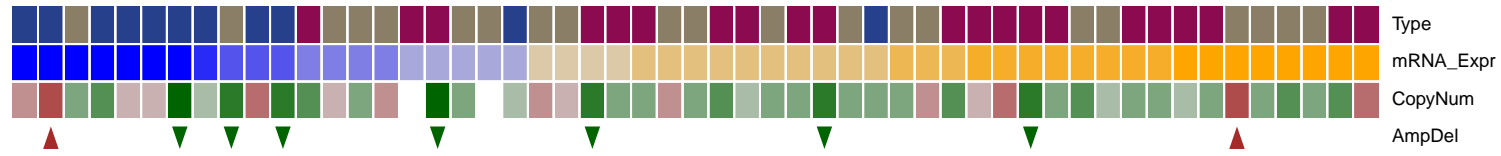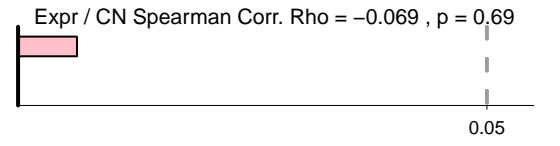

19:3575538  
19:3574625  
19:3574300  
19:3572410  
19:3569036  
19:3558417  
19:3556718  
19:3553032  
19:3551022  
19:3548977  
19:3548338  
19:3548073  
19:3547948  
19:3546364  
19:3546160  
19:3544243  
19:3543846  
19:3539158  
19:3539097  
19:3538705  
19:3538338

GeneLoc  
PromoterAssoc  
CpGIsland

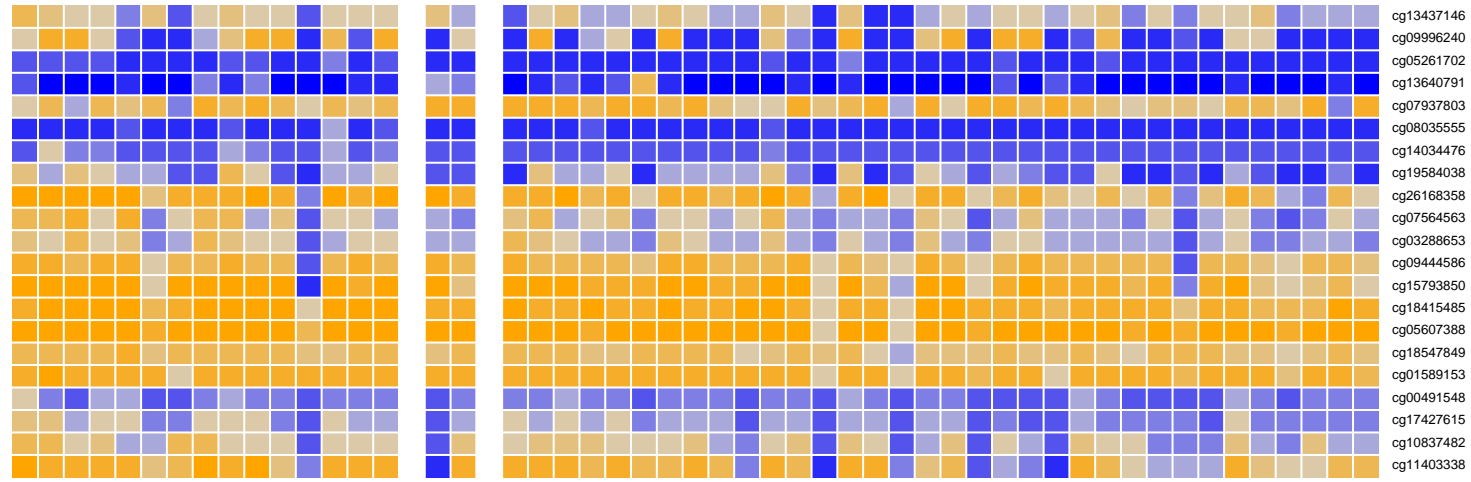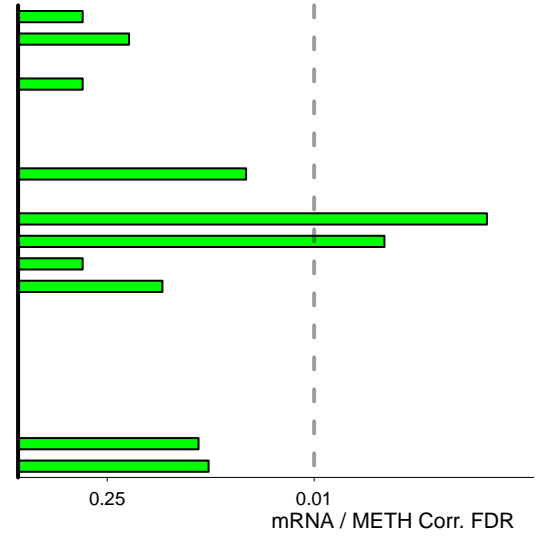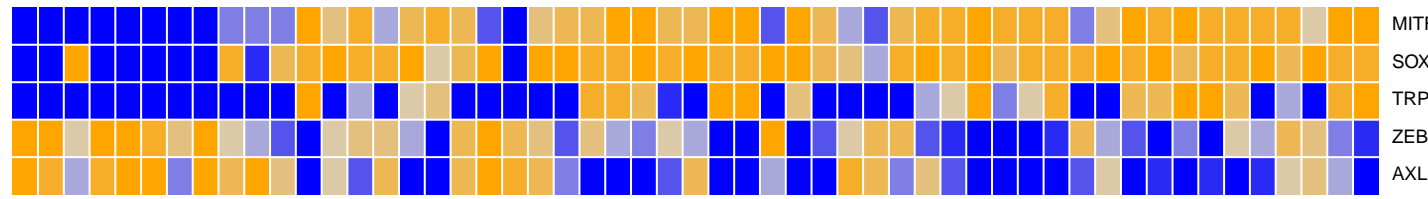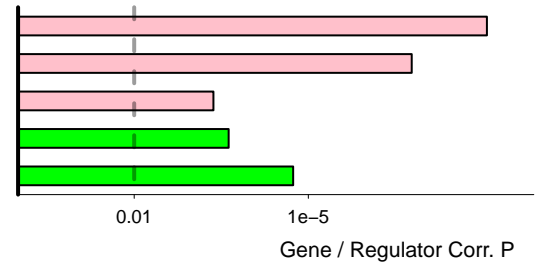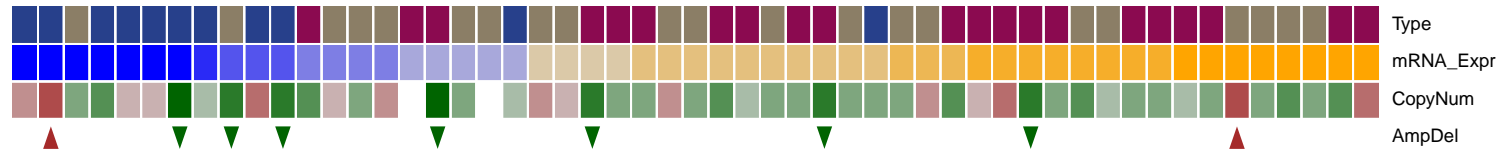

S2125  
S2470  
S2549  
S2261  
S2770A  
S2688  
S2686  
S2356  
S2654  
S2731  
S2405  
S2374  
S2767  
S2247  
S2650  
S2667  
S2357  
S2423  
S2350  
S2338  
S2153  
S2392  
S2379  
S2216  
S2718  
S2333  
S2410  
S2391  
S2408  
S2495  
S2279  
S2761  
S2800  
S2583  
S2380  
S2097  
S2668  
S2400  
S2373  
S2189  
S2510  
S2645  
S2812  
S2406  
S2508  
S2765  
S2330  
S2596  
S2734  
S2381  
S2365  
S2320  
S2521

# SGK1

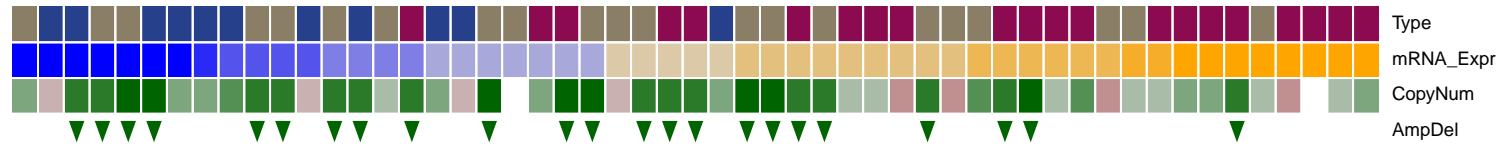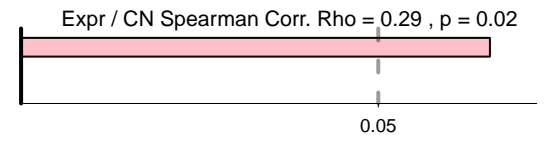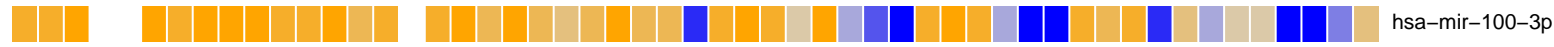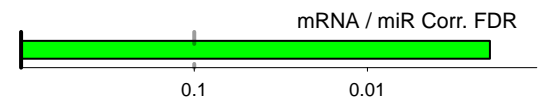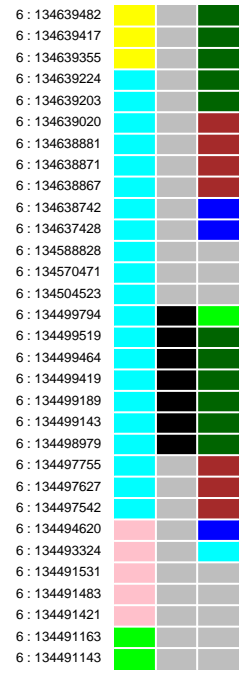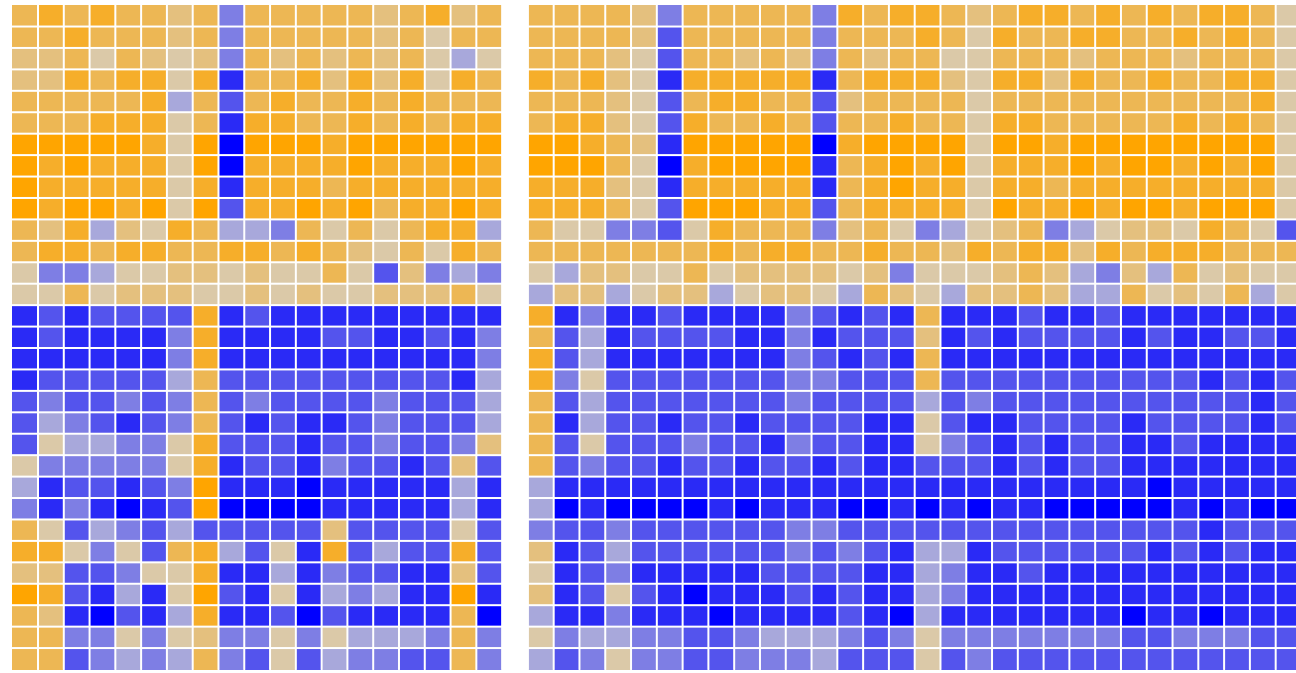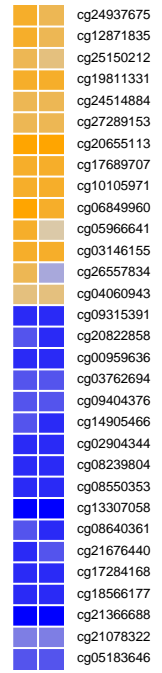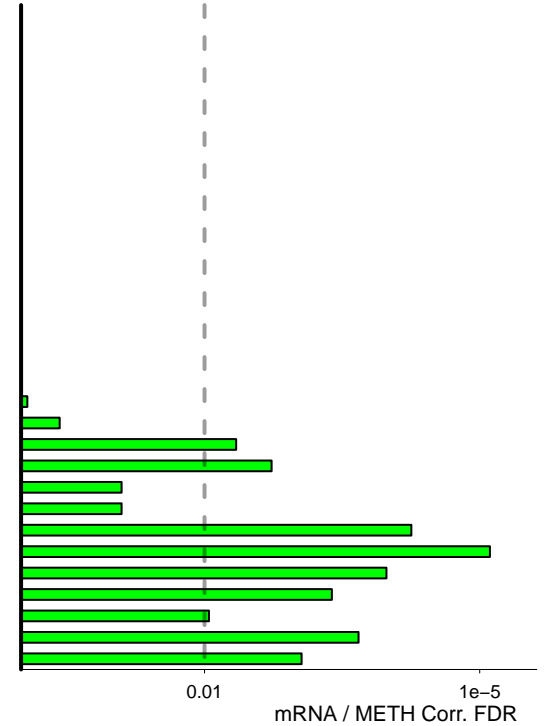

GeneLoc  
PromoterAssoc  
CpGIsland

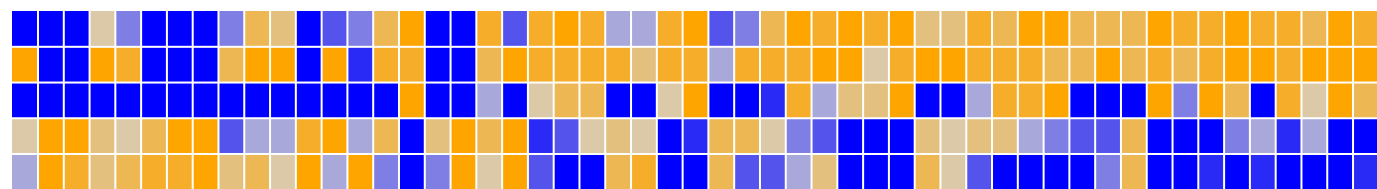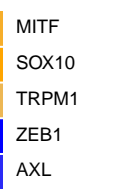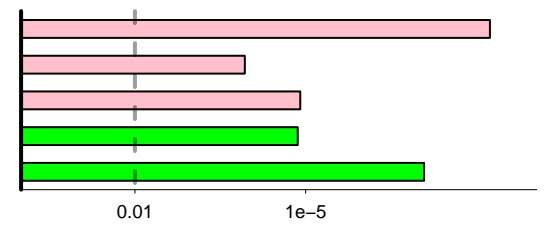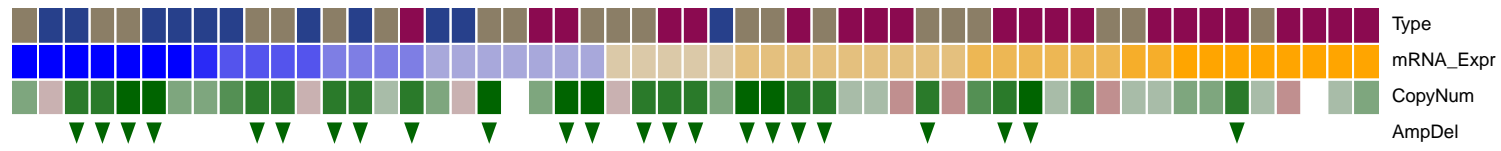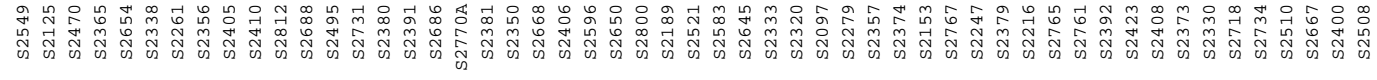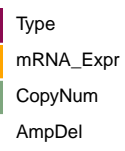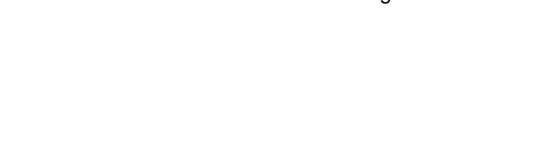

# SHTN1

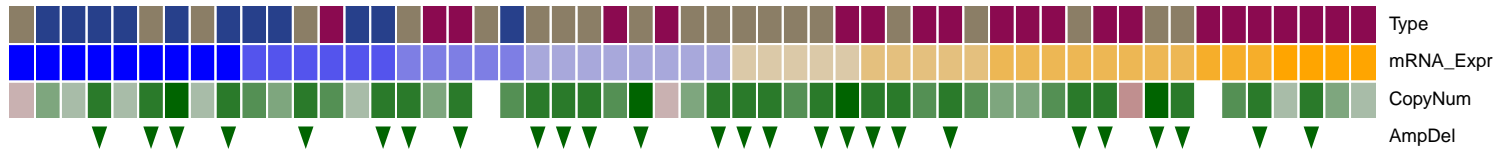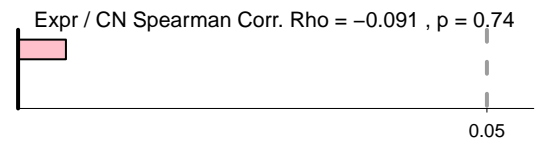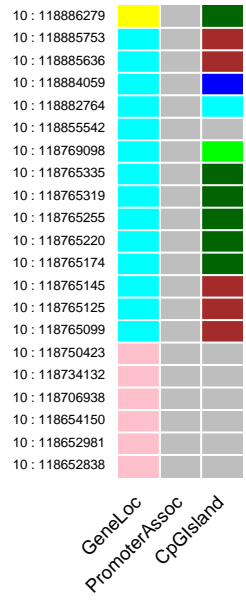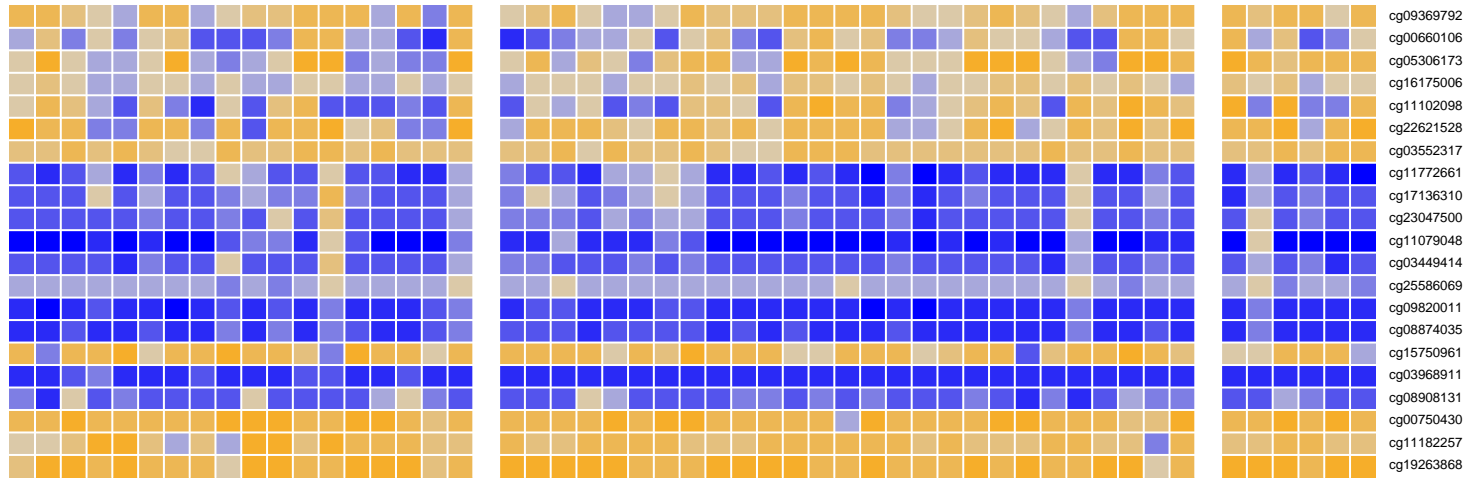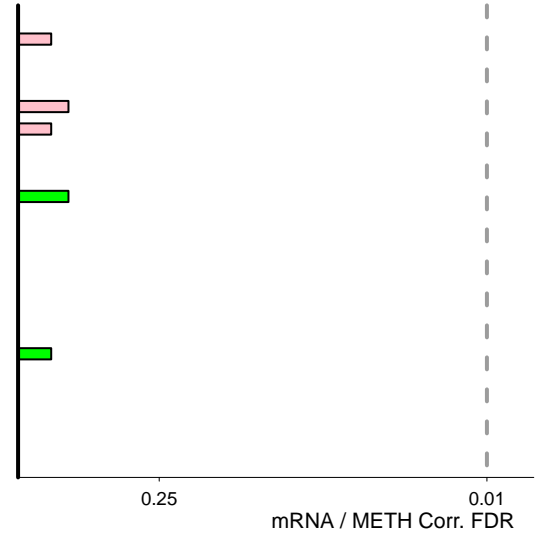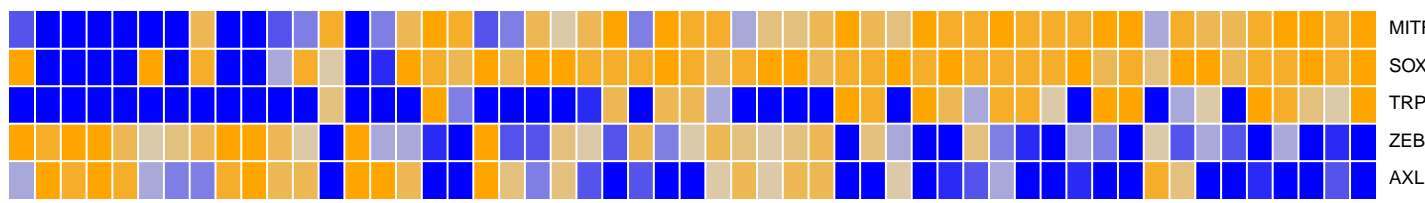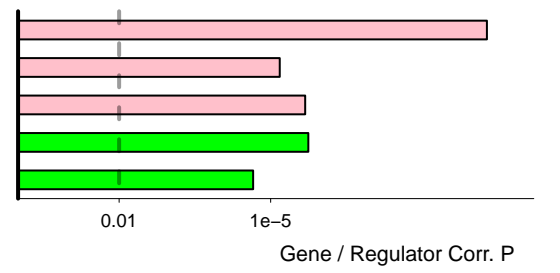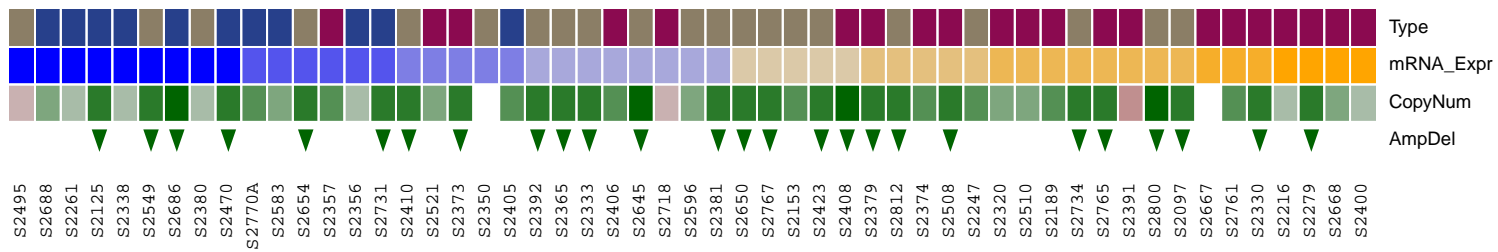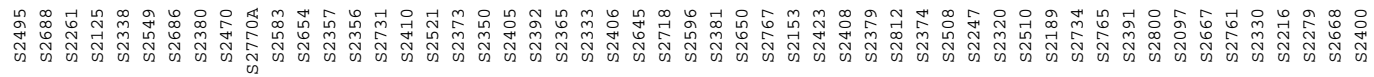

# RNF144A

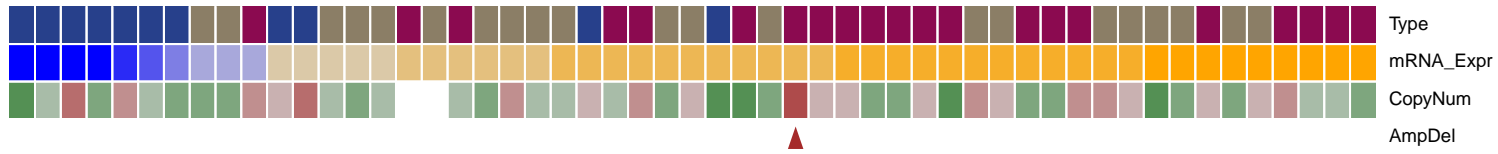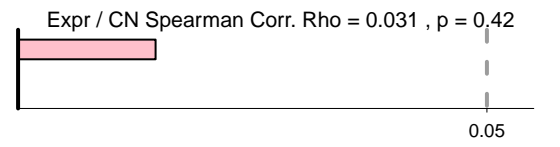

2: 7056075  
2: 7057153  
2: 7057227  
2: 7057245  
2: 7057395  
2: 7057402  
2: 7058390  
2: 7058545  
2: 7059030  
2: 7059760  
2: 7062351  
2: 7073095  
2: 7073129  
2: 7169401  
2: 7171869  
2: 7171963  
2: 7171998  
2: 7172297  
2: 7174685  
2: 7185210  
2: 7189116

GeneLoc  
PromoterAssoc  
CpGIsland

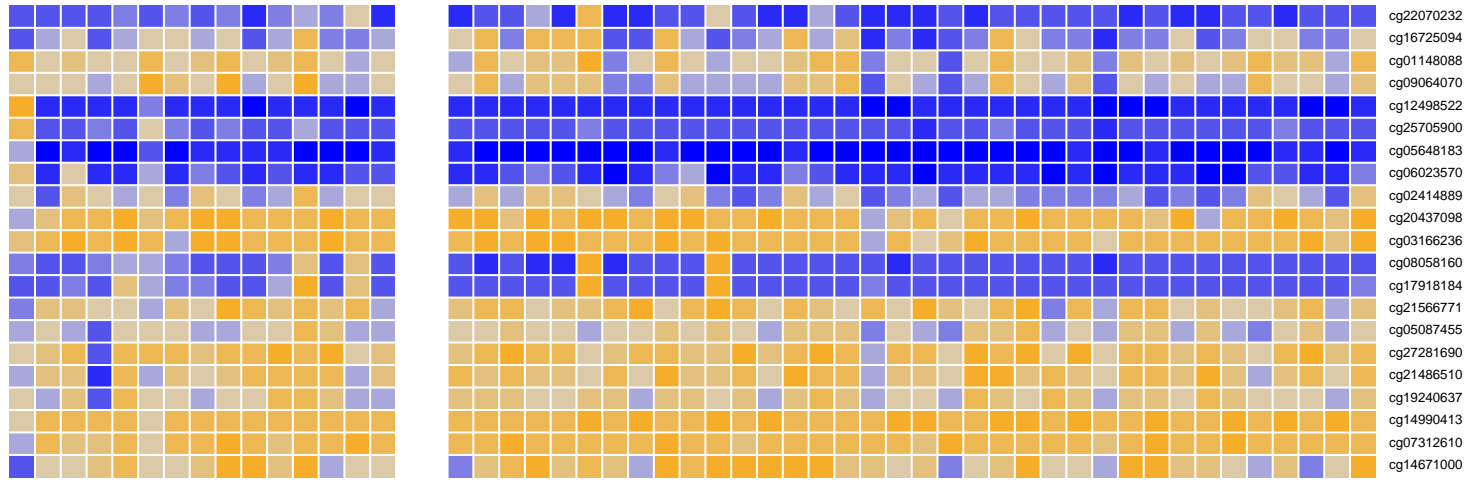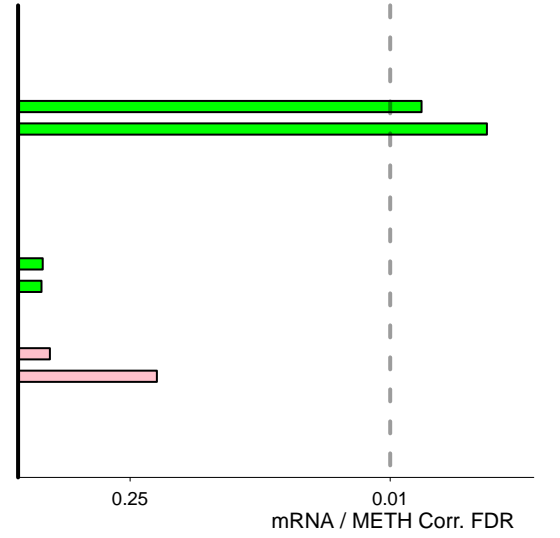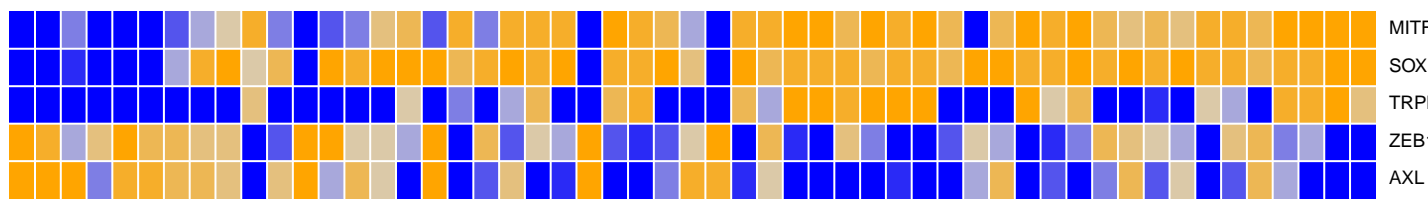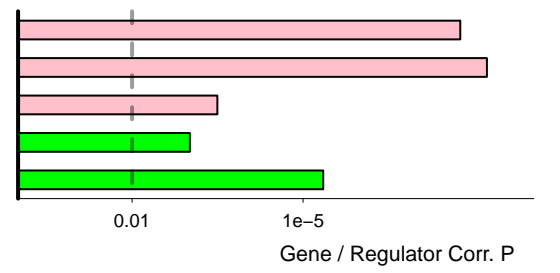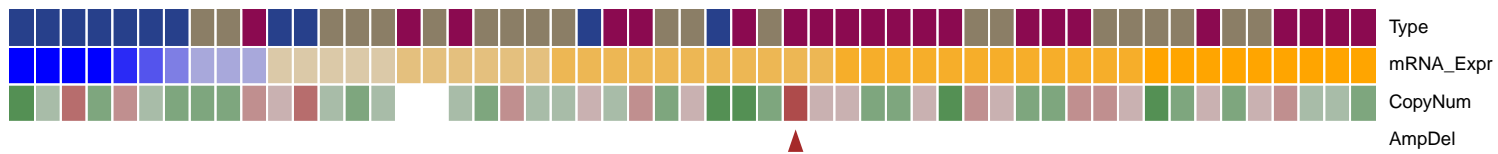

S2125  
S2688  
S2731  
S2686  
S2261  
S2338  
S2583  
S2650  
S2365  
S2357  
S2405  
S2356  
S2495  
S2654  
S2767  
S2667  
S2350  
S2373  
S2645  
S2097  
S2596  
S2734  
S2770A  
S2406  
S2510  
S2392  
S2800  
S2470  
S2508  
S2381  
S2521  
S2391  
S2379  
S2765  
S2330  
S2374  
S2761  
S2549  
S2410  
S2408  
S2668  
S2718  
S2380  
S2153  
S2333  
S2812  
S2189  
S2247  
S2423  
S2320  
S2216  
S2400  
S2279

# RUNX3

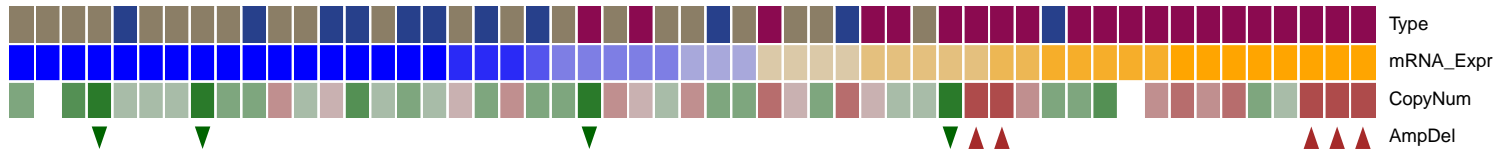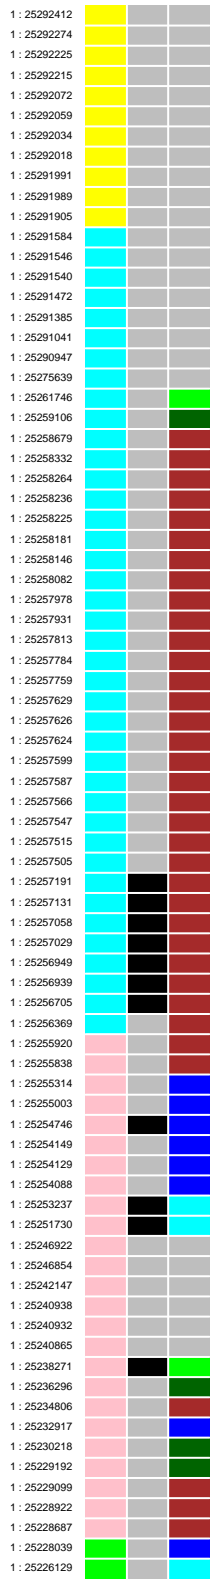

Genes  
PromoterAssoc  
CpGIsland

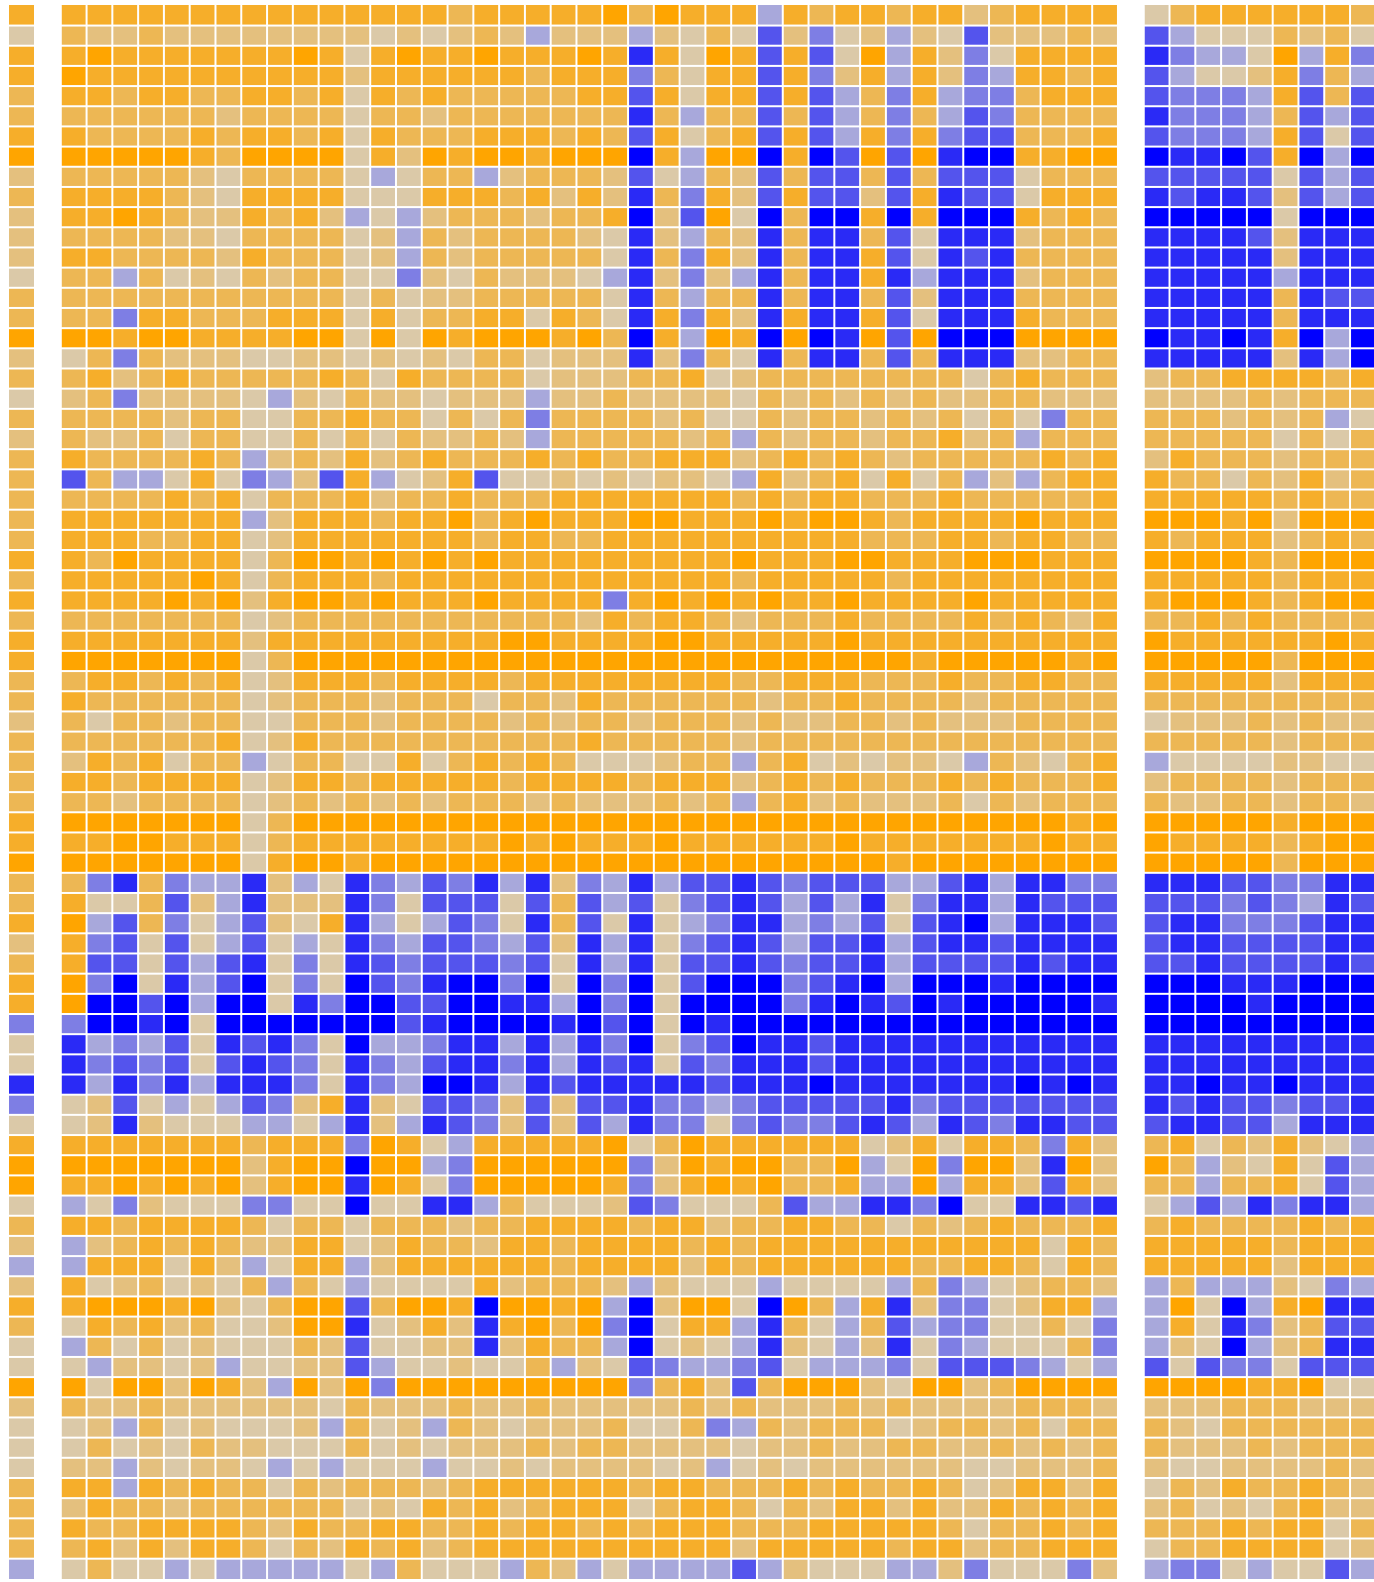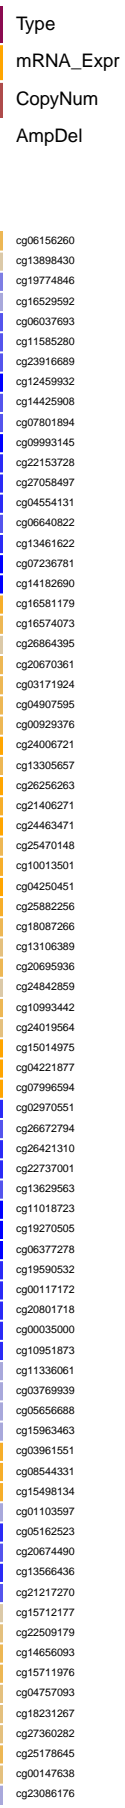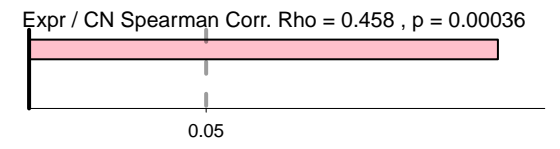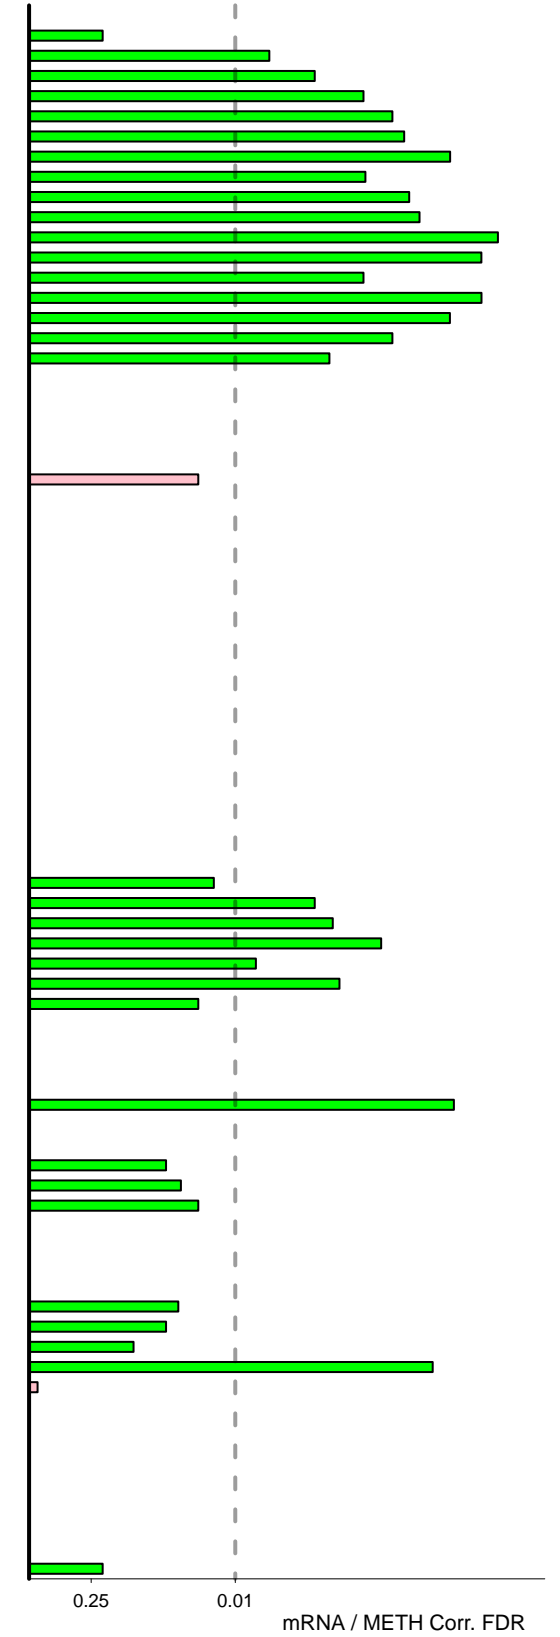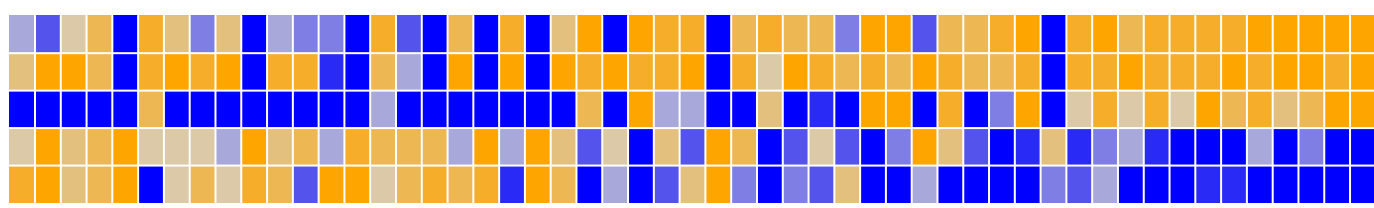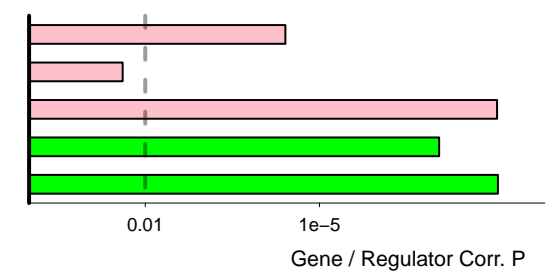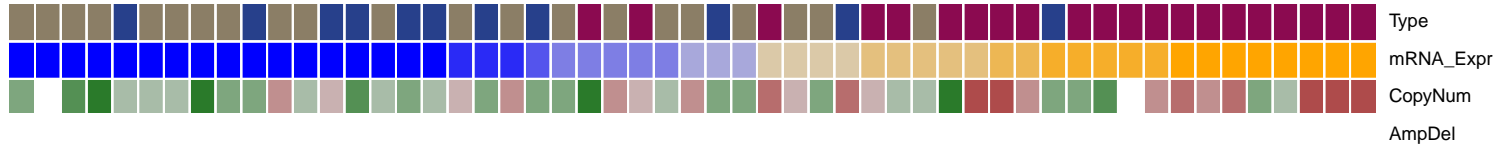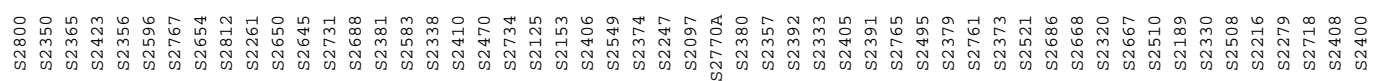

S2800  
S2350  
S2365  
S2423  
S2356  
S2596  
S2767  
S2654  
S2812  
S2261  
S2650  
S2645  
S2731  
S2688  
S2381  
S2583  
S2338  
S2410  
S2470  
S2734  
S2125  
S2153  
S2406  
S2549  
S2374  
S2247  
S2097  
S2770A  
S2380  
S2357  
S2392  
S2333  
S2405  
S2391  
S2765  
S2495  
S2379  
S2761  
S2373  
S2521  
S2686  
S2668  
S2320  
S2667  
S2510  
S2189  
S2330  
S2508  
S2216  
S2279  
S2718  
S2408  
S2400

# IGSF3

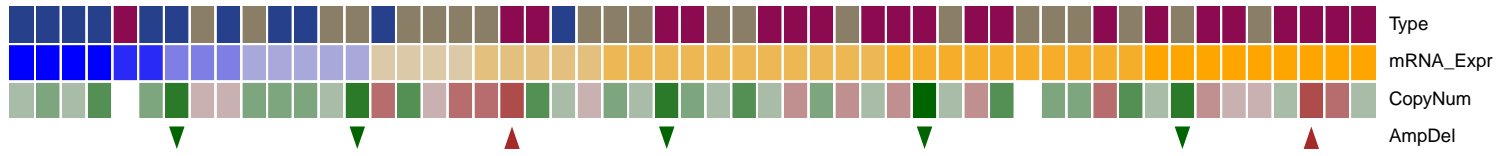

1:117210817  
1:117210620  
1:117210575  
1:117210557  
1:117209954  
1:117209641  
1:117208496  
1:117208338  
1:117207245  
1:117206442  
1:117152162  
1:117151711  
1:117149598  
1:117142844  
1:117129532  
1:117127620  
1:117127417  
1:117117195

GeneLoc  
PromoterAssoc  
CpGIsland

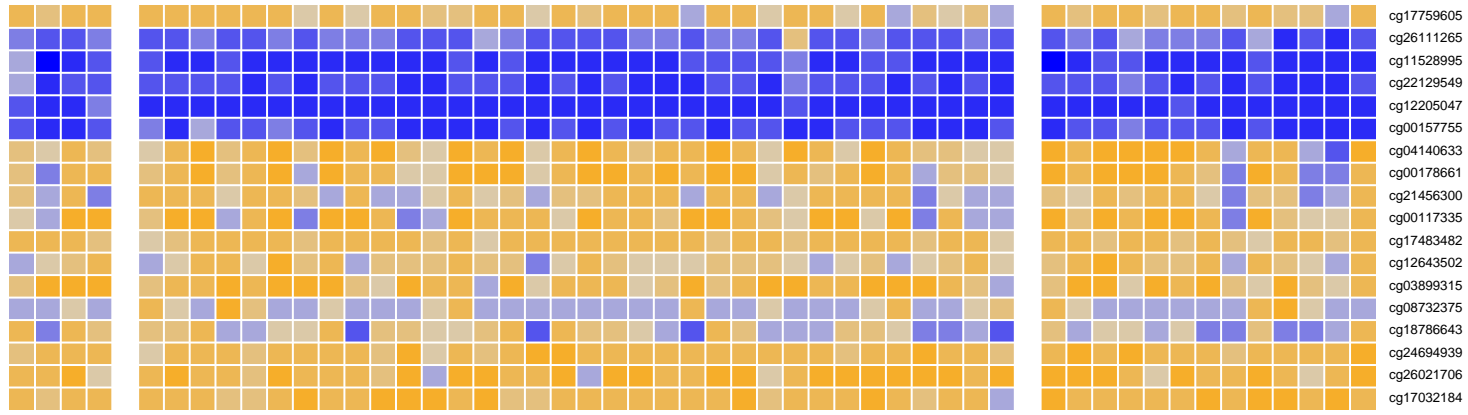

Type  
mRNA\_Expr  
CopyNum  
AmpDel

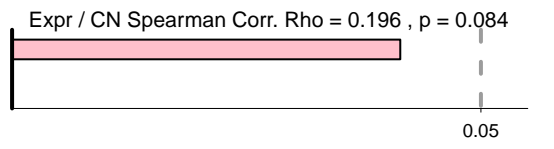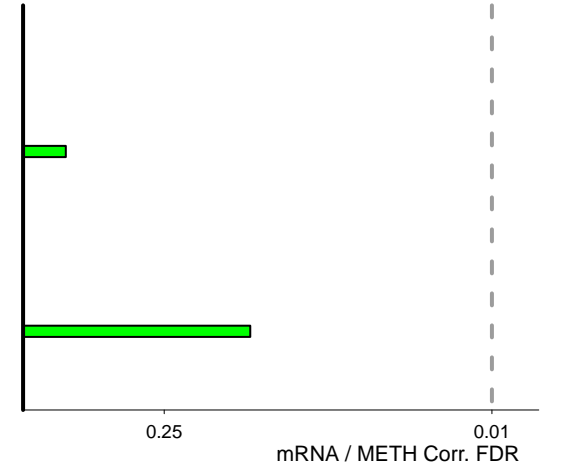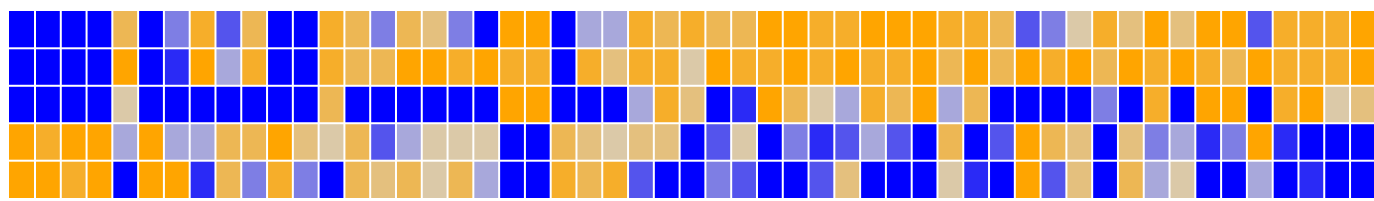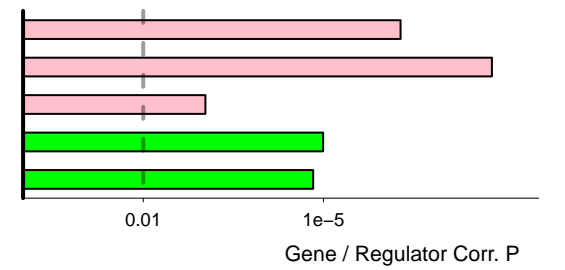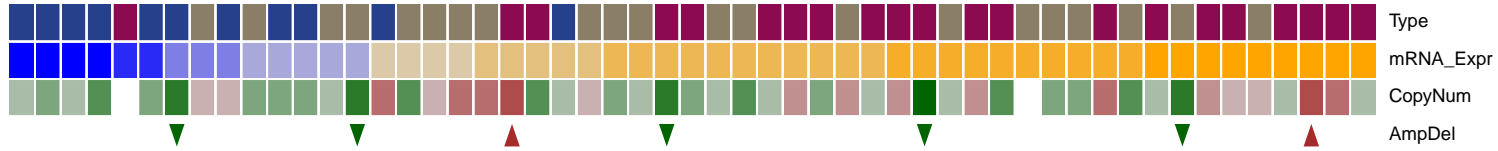

S2356  
S2688  
S2261  
S2770A  
S2667  
S2125  
S2731  
S2734  
S2583  
S2380  
S2470  
S2686  
S2596  
S2423  
S2405  
S2410  
S2767  
S2654  
S2549  
S2408  
S2374  
S2338  
S2650  
S2800  
S2247  
S2379  
S2357  
S2392  
S2333  
S2391  
S2718  
S2668  
S2097  
S2216  
S2406  
S2400  
S2381  
S2508  
S2761  
S2350  
S2645  
S2365  
S2373  
S2153  
S2320  
S2812  
S2521  
S2765  
S2495  
S2510  
S2330  
S2189  
S2279

Type  
mRNA\_Expr  
CopyNum  
AmpDel

# ST3GAL6

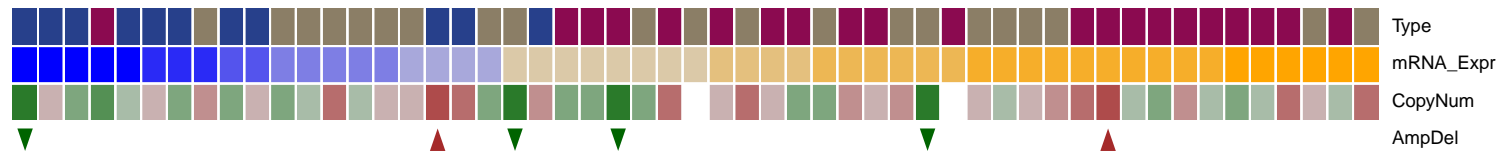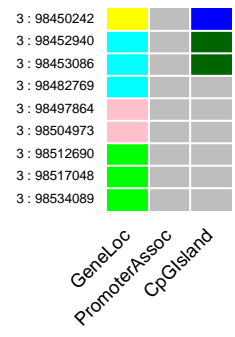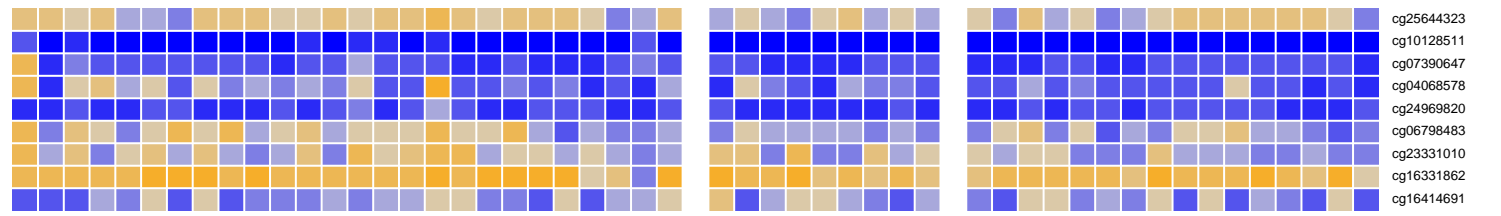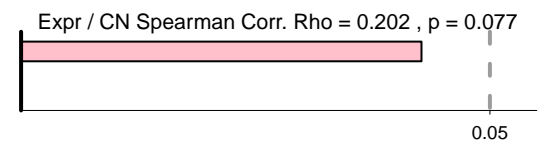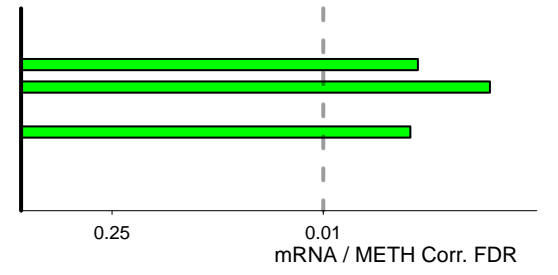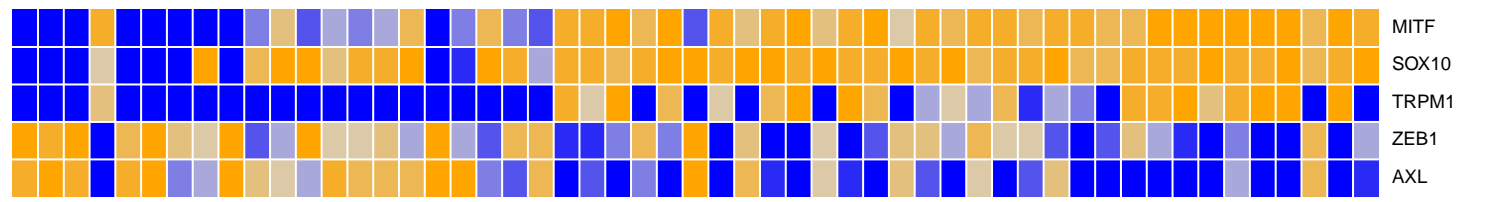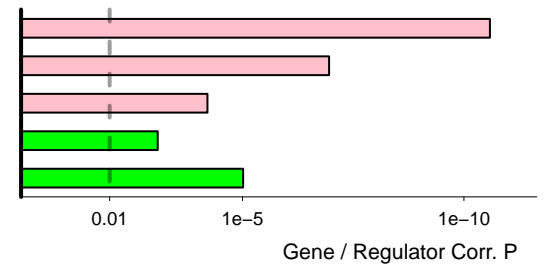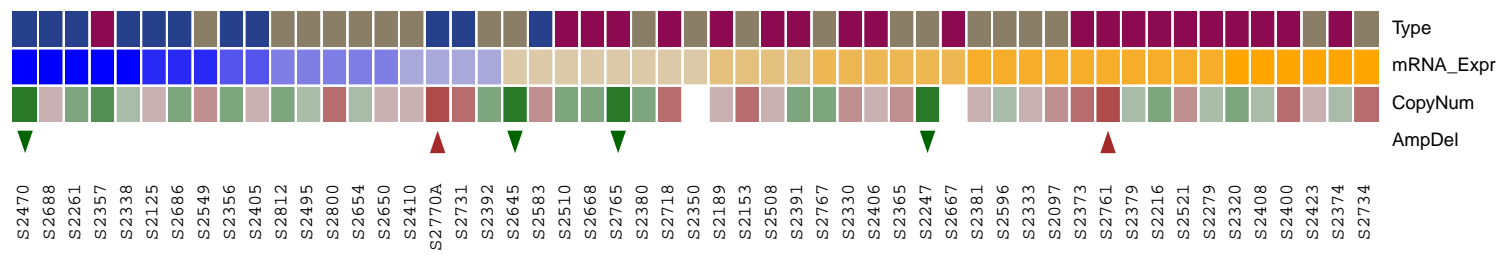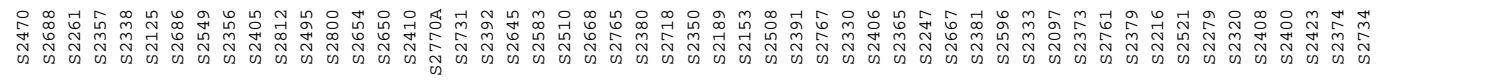



# GAS7

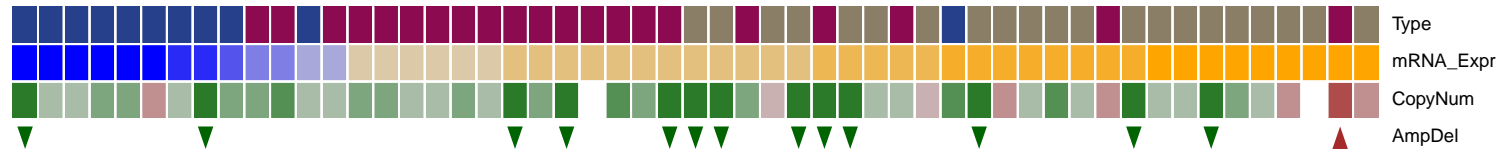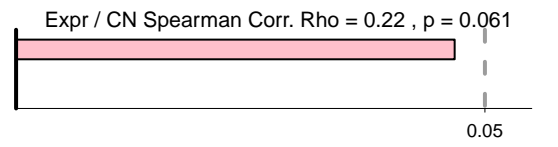

17:10102558  
17:10102439  
17:10102232  
17:10101581  
17:10101195  
17:10101010  
17:10098365  
17:10096767  
17:10088882  
17:10081280  
17:10075025  
17:10059923  
17:10048989  
17:10039537  
17:10030599  
17:10024297  
17:10021690  
17:10018631  
17:10018532  
17:10017891  
17:10002773  
17:9989409  
17:9976437  
17:9967499  
17:9967431  
17:9967417  
17:9963861  
17:9954904  
17:9941095  
17:9940970  
17:9940321  
17:9940227  
17:9940004  
17:9936785  
17:9935595  
17:9930194  
17:9930101  
17:9929867  
17:9929755  
17:9929719  
17:9929698  
17:9929528  
17:9924800  
17:9921982  
17:9874188  
17:9871831  
17:9863081  
17:9863061  
17:9863009  
17:9862924  
17:9862900  
17:9862893  
17:9862873  
17:9862763  
17:9862752  
17:9861712  
17:9850268  
17:9840728  
17:9834056  
17:9832474  
17:9828775  
17:9821552  
17:9821493  
17:9821299  
17:9819556

GeneLoc  
PromoterAssoc  
CpGIsland

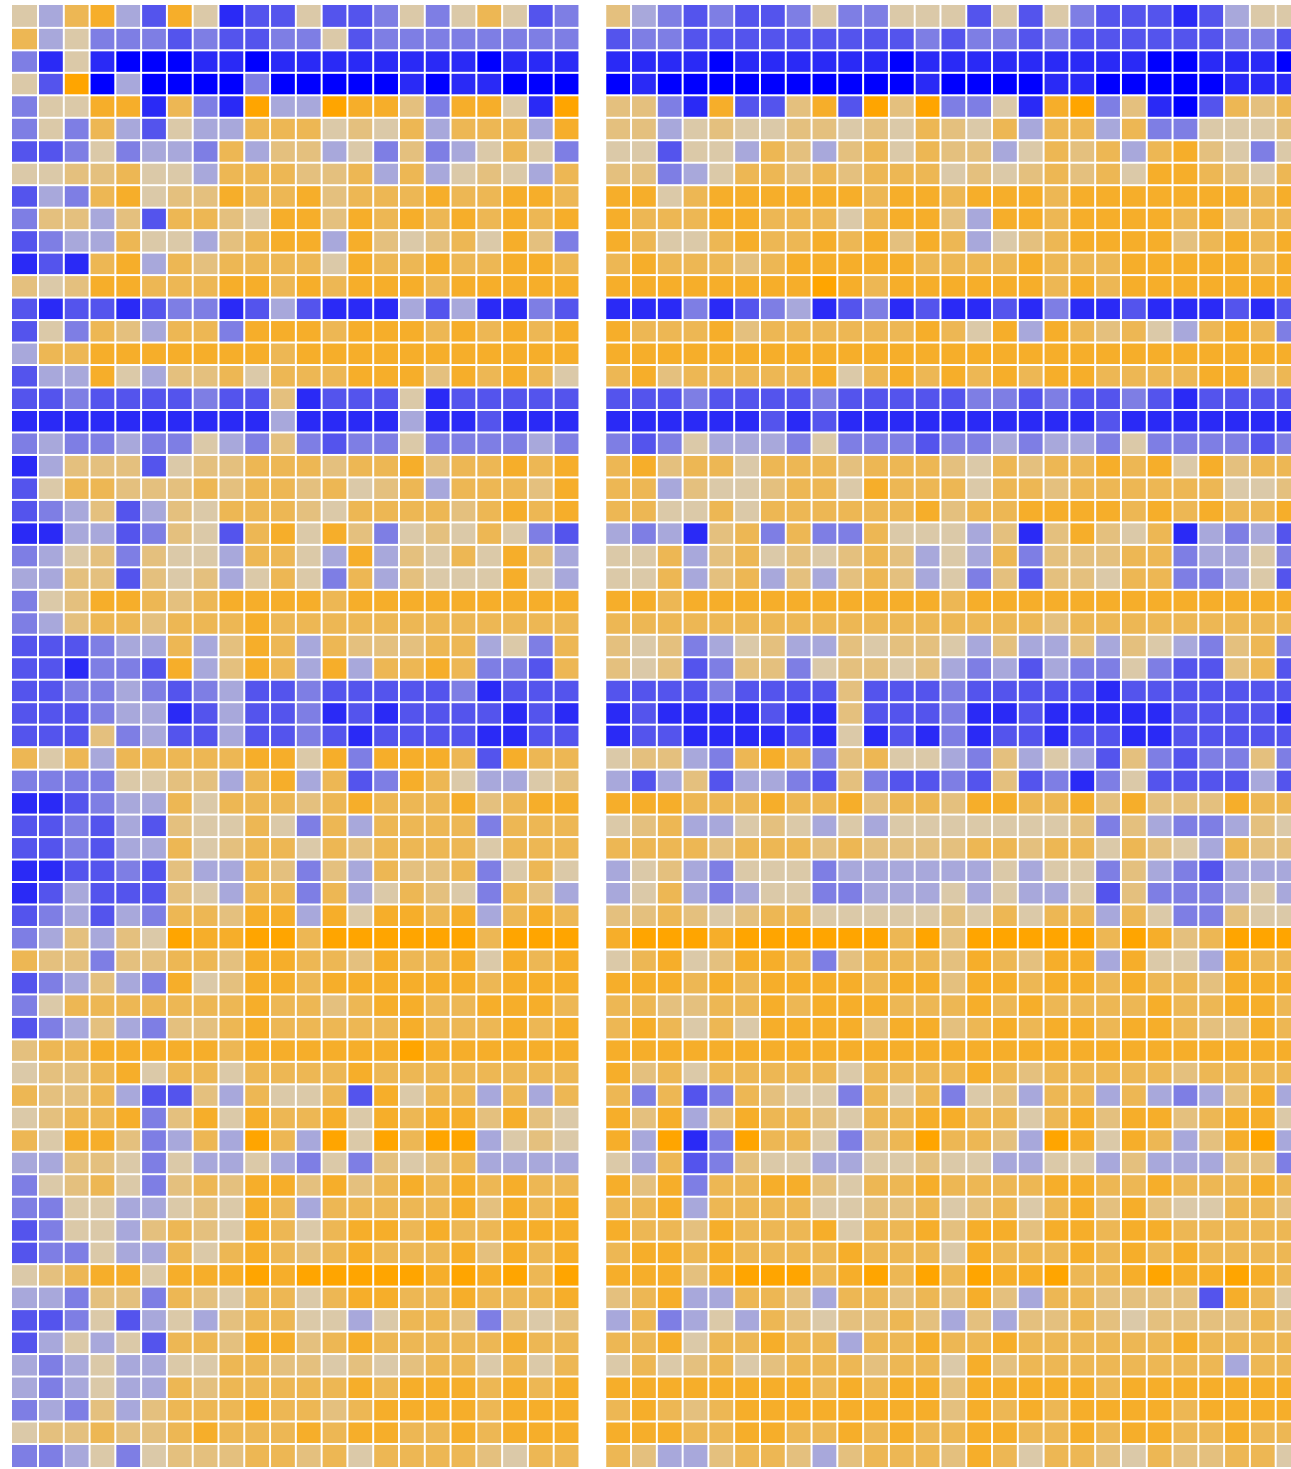

cg13991233  
cg24513224  
cg19011844  
cg25116216  
cg13291283  
cg17353900  
cg25379762  
cg11851411  
cg00640825  
cg20186473  
cg12245236  
cg01929340  
cg10296867  
cg15285733  
cg22360318  
cg06130714  
cg26283098  
cg15661389  
cg10299448  
cg26999423  
cg03594506  
cg08102611  
cg08662168  
cg13773741  
cg18346531  
cg21554670  
cg11734841  
cg17830244  
cg00052665  
cg10618704  
cg00842918  
cg16768966  
cg03762242  
cg02605292  
cg23738585  
cg25558027  
cg05558046  
cg22596049  
cg20572153  
cg24524013  
cg10517535  
cg23833461  
cg11122944  
cg02018337  
cg15664943  
cg16983282  
cg10237765  
cg17479840  
cg04788418  
cg06377635  
cg17192115  
cg12833931  
cg26996616  
cg12697325  
cg04267691  
cg12642651  
cg16537306  
cg22541400  
cg18657751  
cg25135555  
cg16682454  
cg07049421  
cg05165825  
cg12091339  
cg01236299

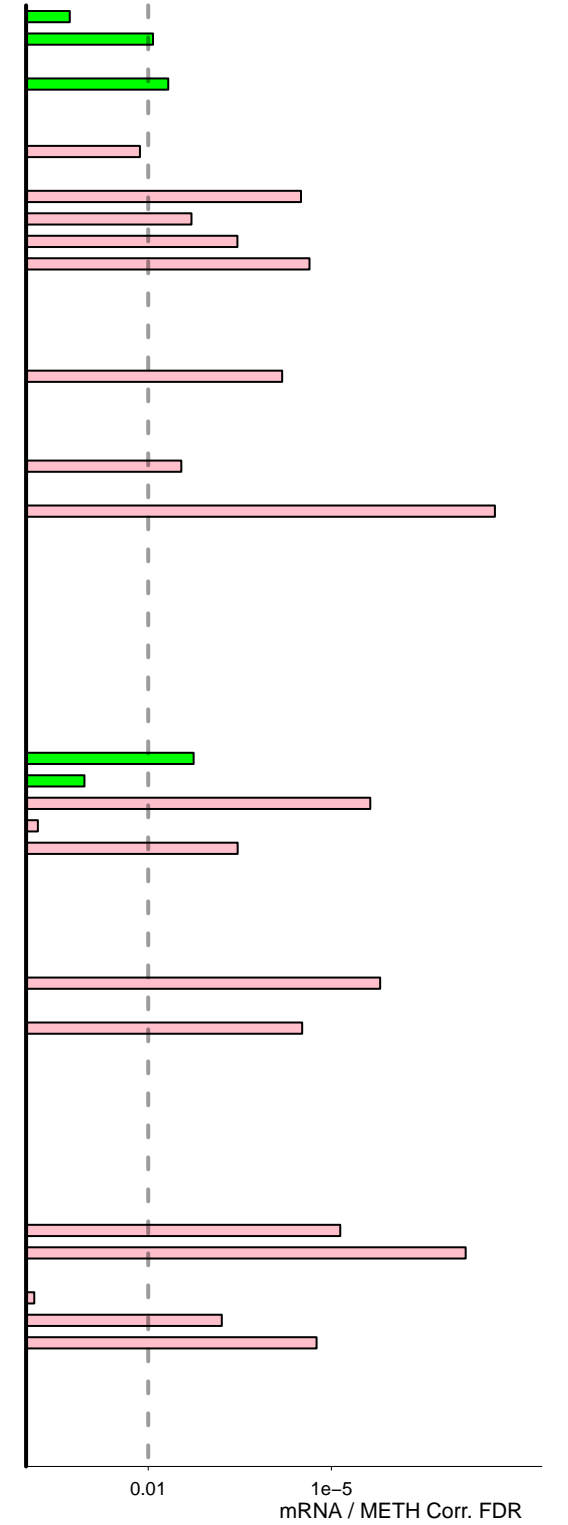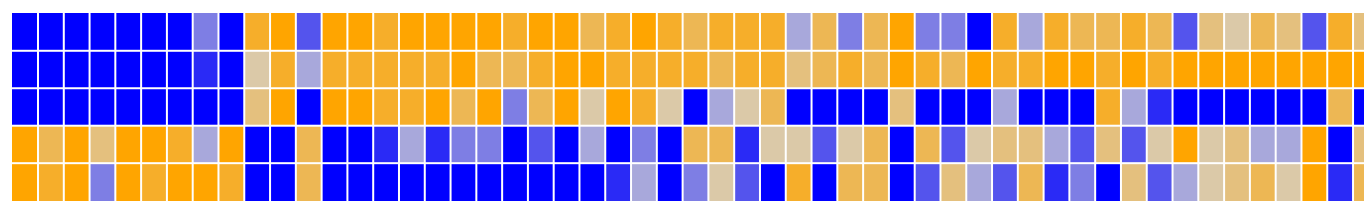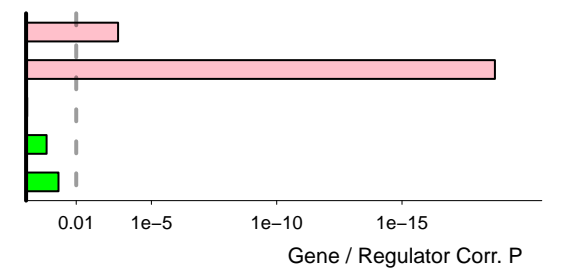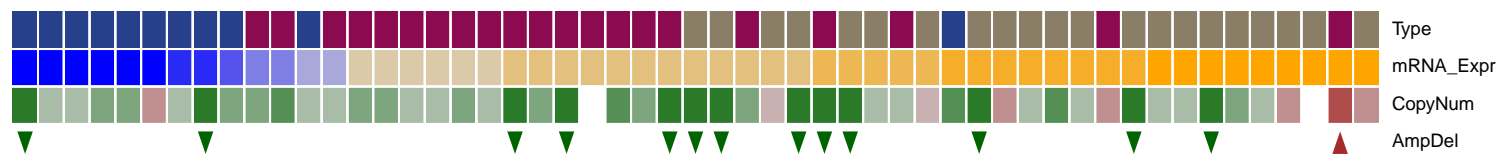

S2125  
S2338  
S2356  
S2686  
S2770A  
S2470  
S2688  
S2731  
S2261  
S2357  
S2391  
S2583  
S2408  
S2374  
S2510  
S2216  
S2521  
S2718  
S2765  
S2373  
S2406  
S2400  
S2667  
S2330  
S2320  
S2189  
S2380  
S2381  
S2668  
S2596  
S2800  
S2761  
S2654  
S2423  
S2279  
S2645  
S2405  
S2549  
S2247  
S2650  
S2734  
S2392  
S2379  
S2097  
S2333  
S2495  
S2767  
S2365  
S2410  
S2812  
S2350  
S2508  
S2153

# AP1S2

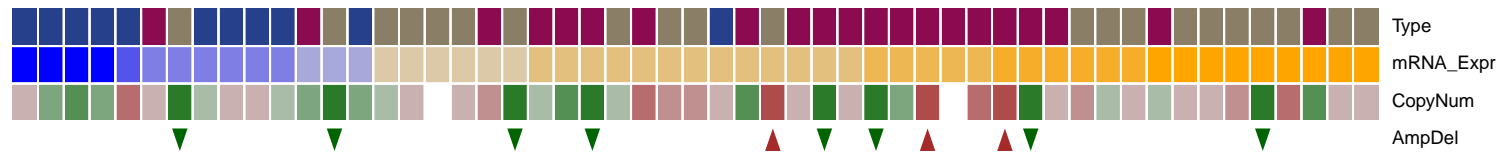

X: 15874162  
X: 15871902  
X: 15869341  
X: 15866587

GeneLoc  
PromoterAssoc  
CpGIsland

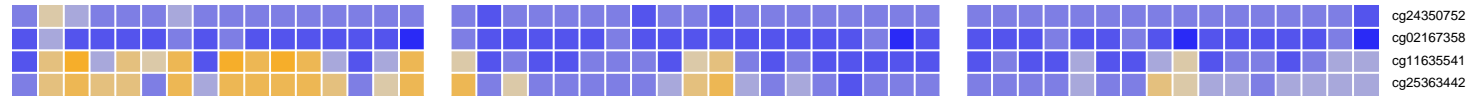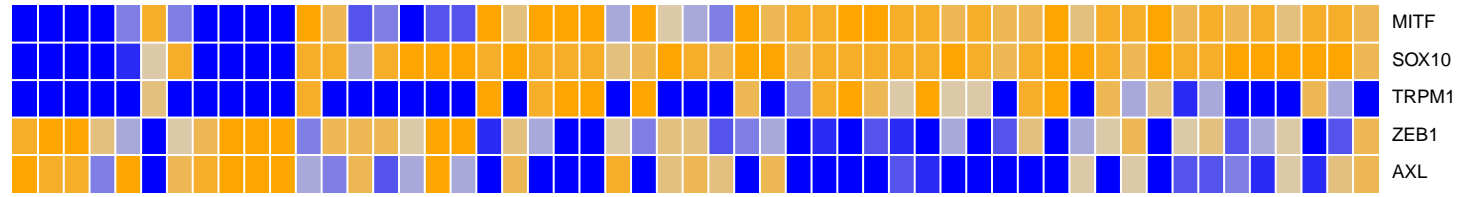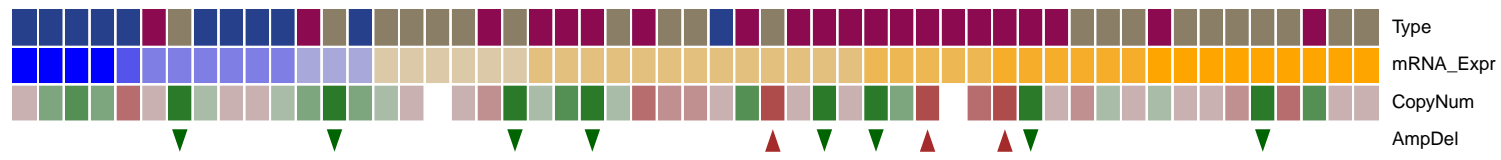

S2688  
S2261  
S2470  
S2686  
S2731  
S2357  
S2654  
S2338  
S2770A  
S2125  
S2356  
S2320  
S2380  
S2583  
S2645  
S2549  
S2350  
S2495  
S2521  
S2153  
S2216  
S2374  
S2408  
S2800  
S2765  
S2365  
S2650  
S2405  
S2718  
S2410  
S2373  
S2510  
S2391  
S2406  
S2668  
S2330  
S2667  
S2189  
S2761  
S2379  
S2400  
S2812  
S2596  
S2381  
S2279  
S2333  
S2247  
S2392  
S2734  
S2767  
S2508  
S2097  
S2423

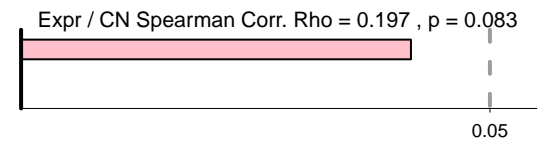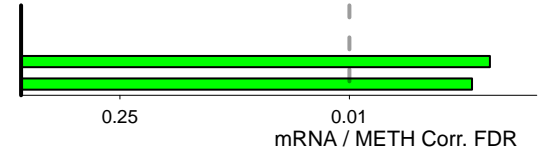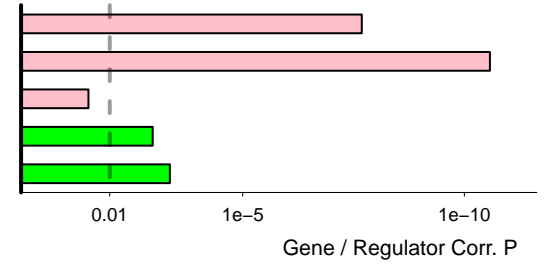

# FCRLA

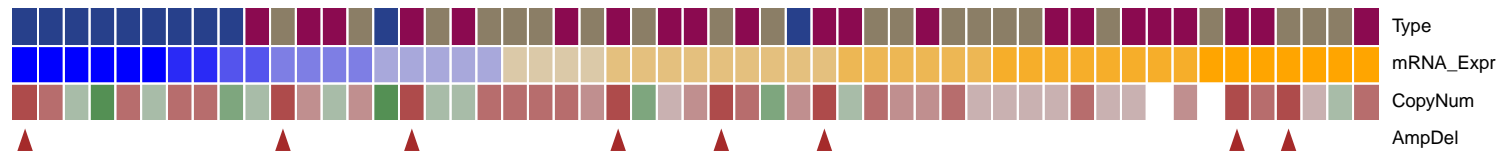

1: 161675579  
 1: 161676266  
 1: 161676581  
 1: 161679461  
 1: 161679921  
 1: 161684066

GeneLoc  
 PromoterAssoc  
 CpGIsland

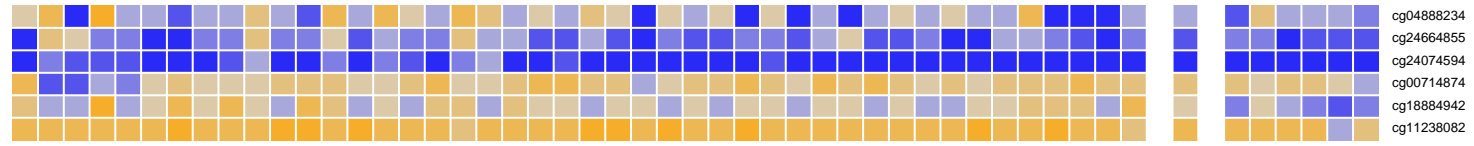

cg04888234  
 cg24664855  
 cg24074594  
 cg00714874  
 cg18884942  
 cg11238082

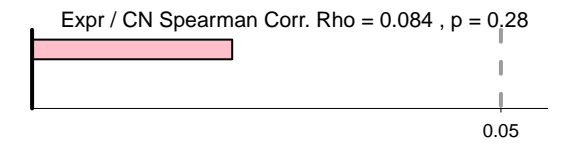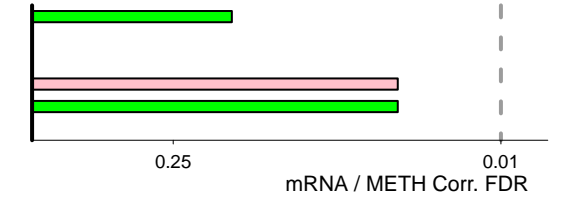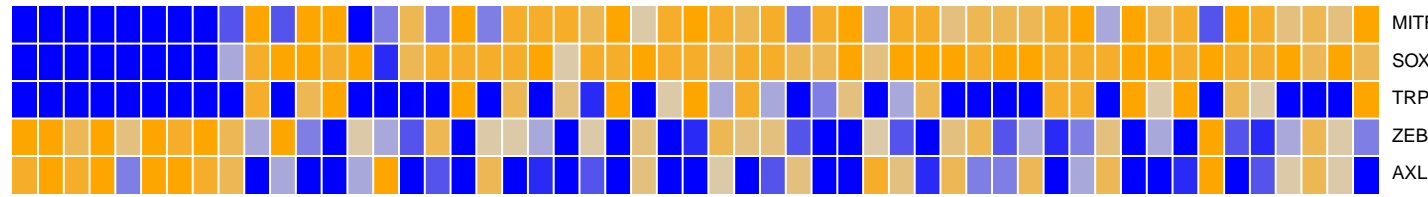

MITF  
 SOX10  
 TRPM1  
 ZEB1  
 AXL

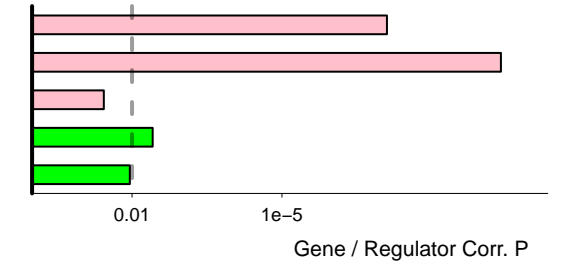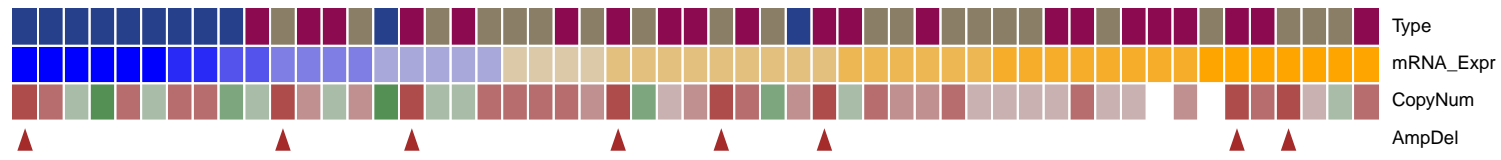

S2470  
 S2125  
 S2338  
 S2770A  
 S2686  
 S2356  
 S2688  
 S2261  
 S2583  
 S2216  
 S2495  
 S2718  
 S2391  
 S2549  
 S2731  
 S2761  
 S2645  
 S2408  
 S2654  
 S2596  
 S2734  
 S2357  
 S2333  
 S2374  
 S2365  
 S2189  
 S2521  
 S2381  
 S2379  
 S2247  
 S2405  
 S2373  
 S2279  
 S2800  
 S2097  
 S2508  
 S2153  
 S2380  
 S2392  
 S2410  
 S2510  
 S2320  
 S2650  
 S2400  
 S2667  
 S2330  
 S2350  
 S2406  
 S2668  
 S2812  
 S2423  
 S2767  
 S2765

Type  
 mRNA\_Expr  
 CopyNum  
 AmpDel

# TSPAN10

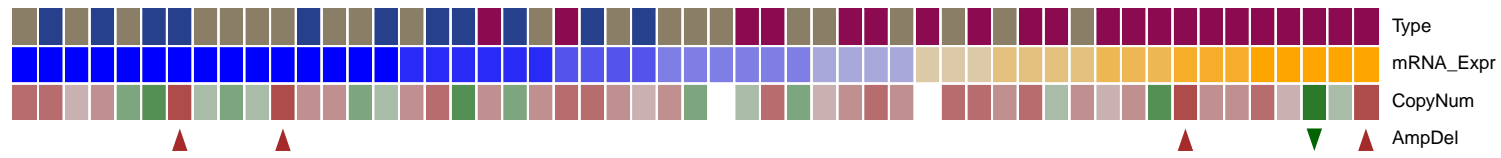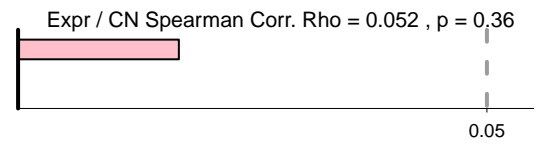

17 : 79604385  
 17 : 79606645  
 17 : 79608890  
 17 : 79609067  
 17 : 79609095  
 17 : 79609161  
 17 : 79609272  
 17 : 79609290  
 17 : 79609346  
 17 : 79614795  
 17 : 79614917  
 17 : 79615101  
 17 : 79615552  
 17 : 79615652

GeneLoc  
 PromoterAssoc  
 CpGIsland

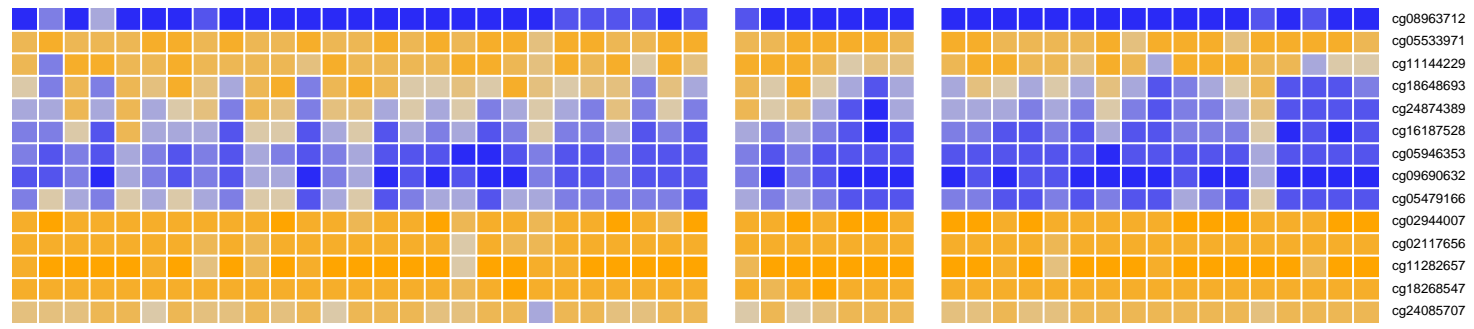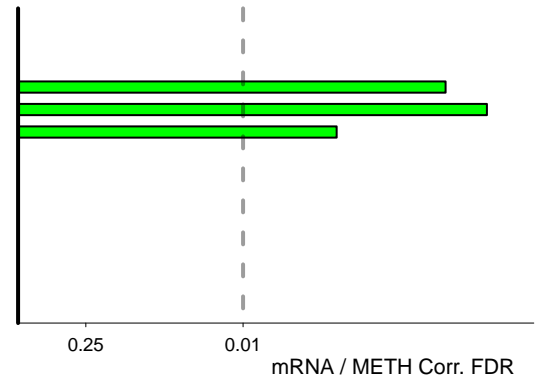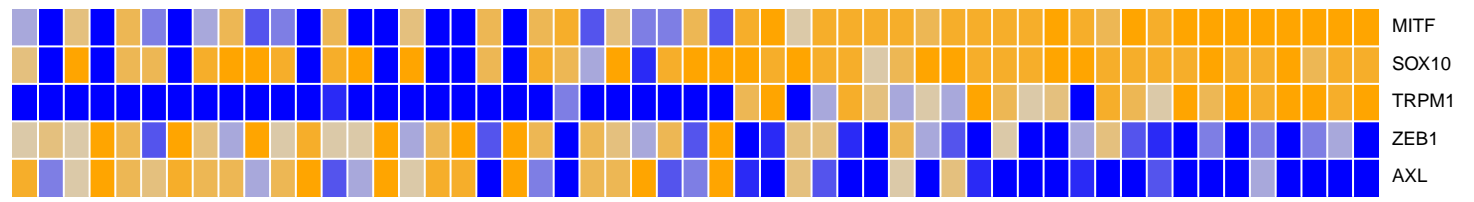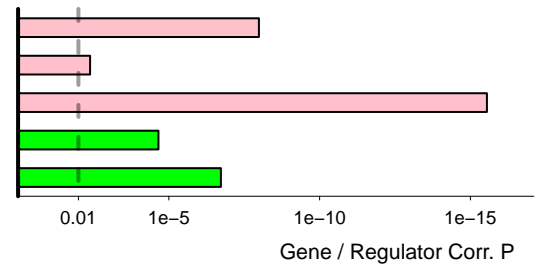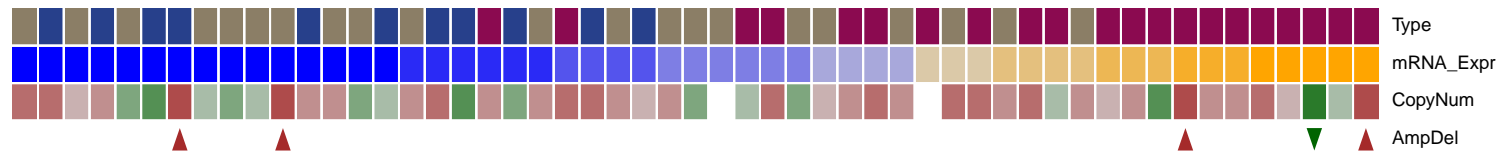

S2800  
 S2686  
 S2767  
 S2125  
 S2423  
 S2405  
 S2470  
 S2650  
 S2410  
 S2495  
 S2654  
 S2688  
 S2333  
 S2549  
 S2356  
 S2338  
 S2812  
 S2261  
 S2761  
 S2770A  
 S2380  
 S2373  
 S2583  
 S2153  
 S2731  
 S2645  
 S2392  
 S2350  
 S2508  
 S2521  
 S2365  
 S2247  
 S2510  
 S2357  
 S2381  
 S2667  
 S2097  
 S2330  
 S2596  
 S2189  
 S2279  
 S2734  
 S2379  
 S2406  
 S2668  
 S2408  
 S2718  
 S2374  
 S2320  
 S2400  
 S2765  
 S2216  
 S2391

# MCF2L

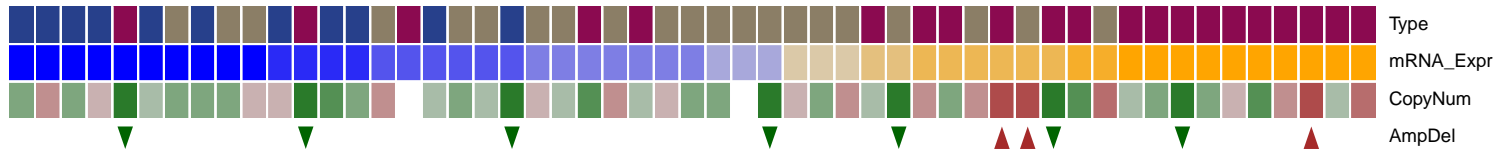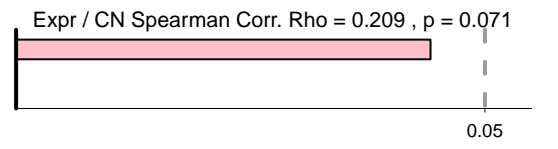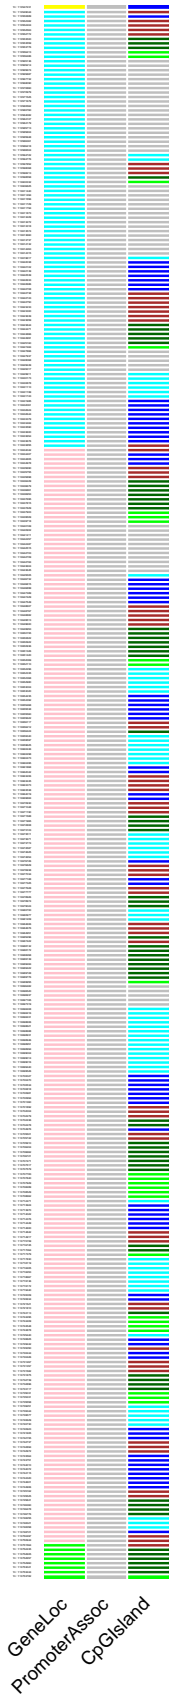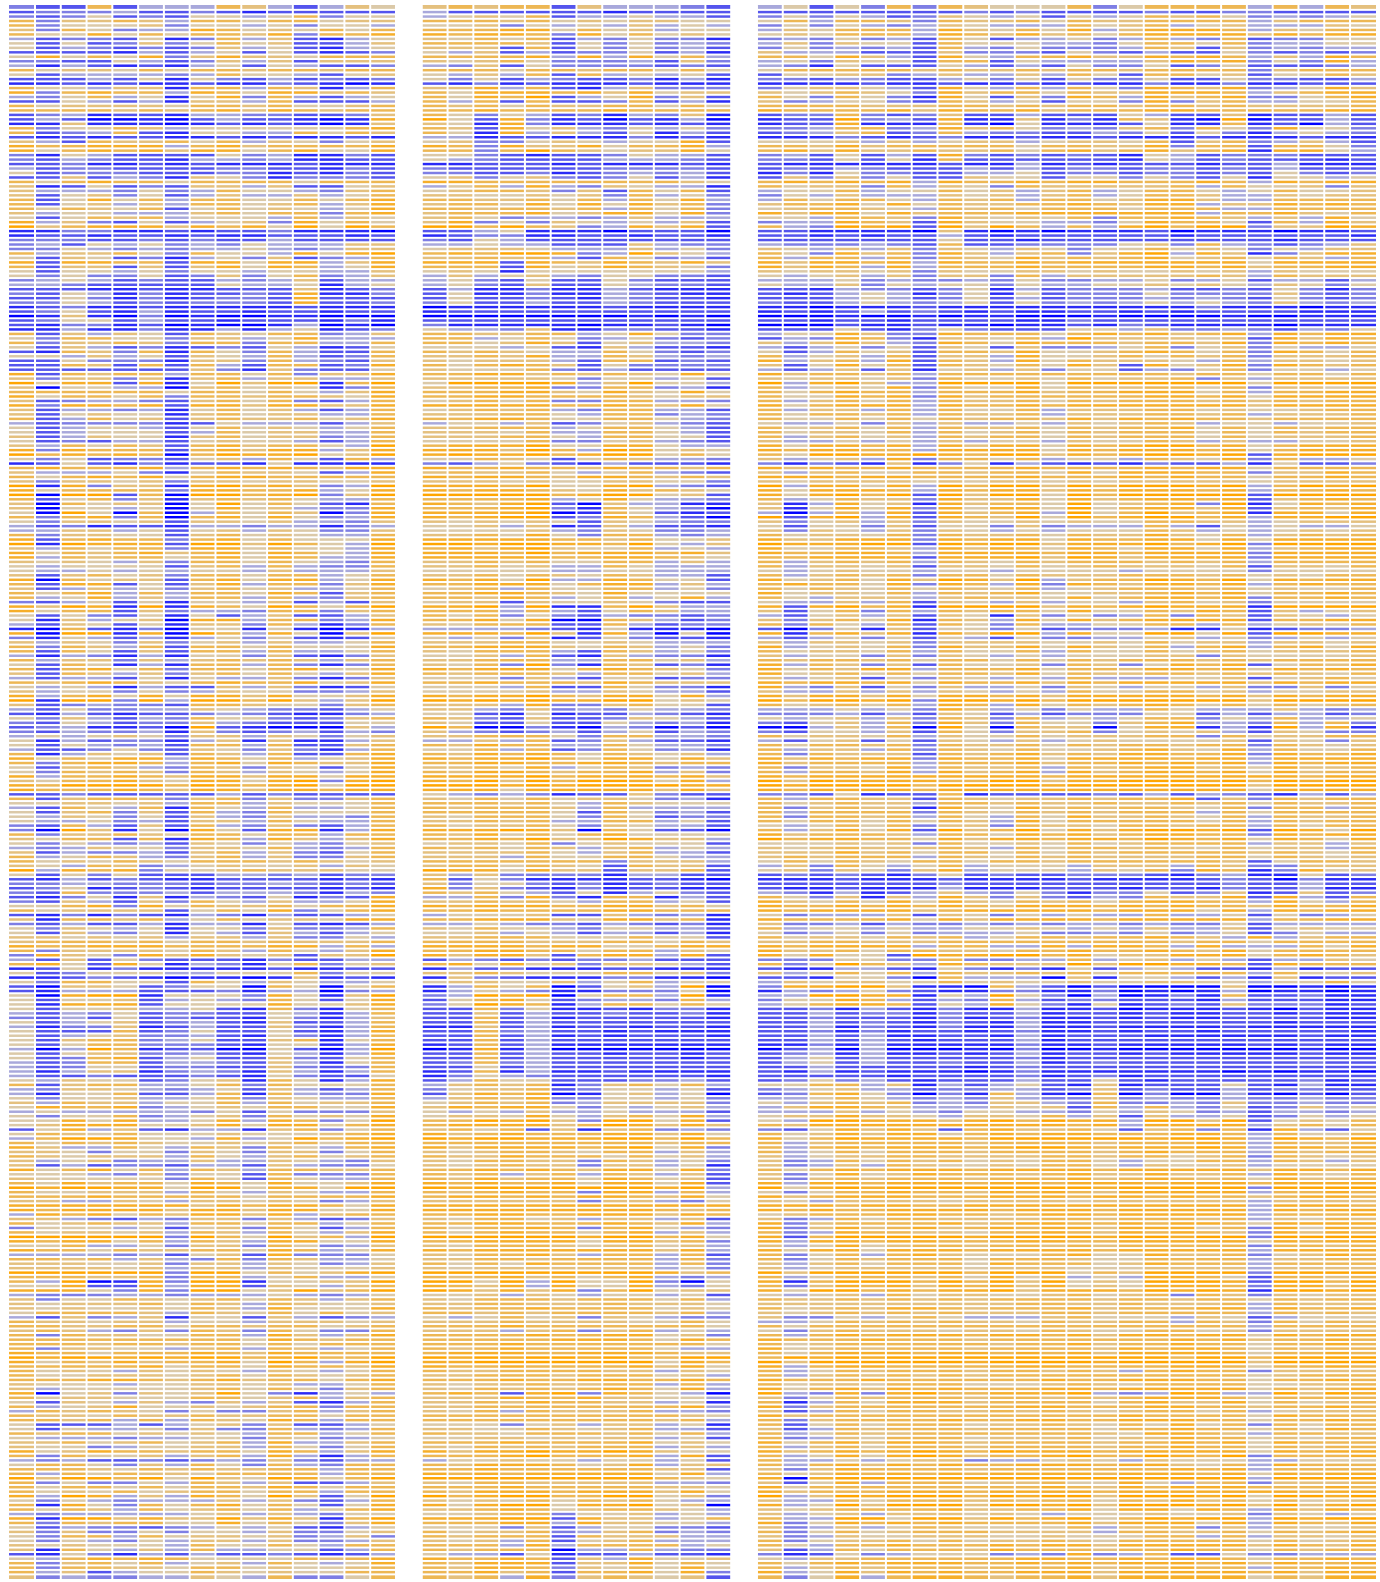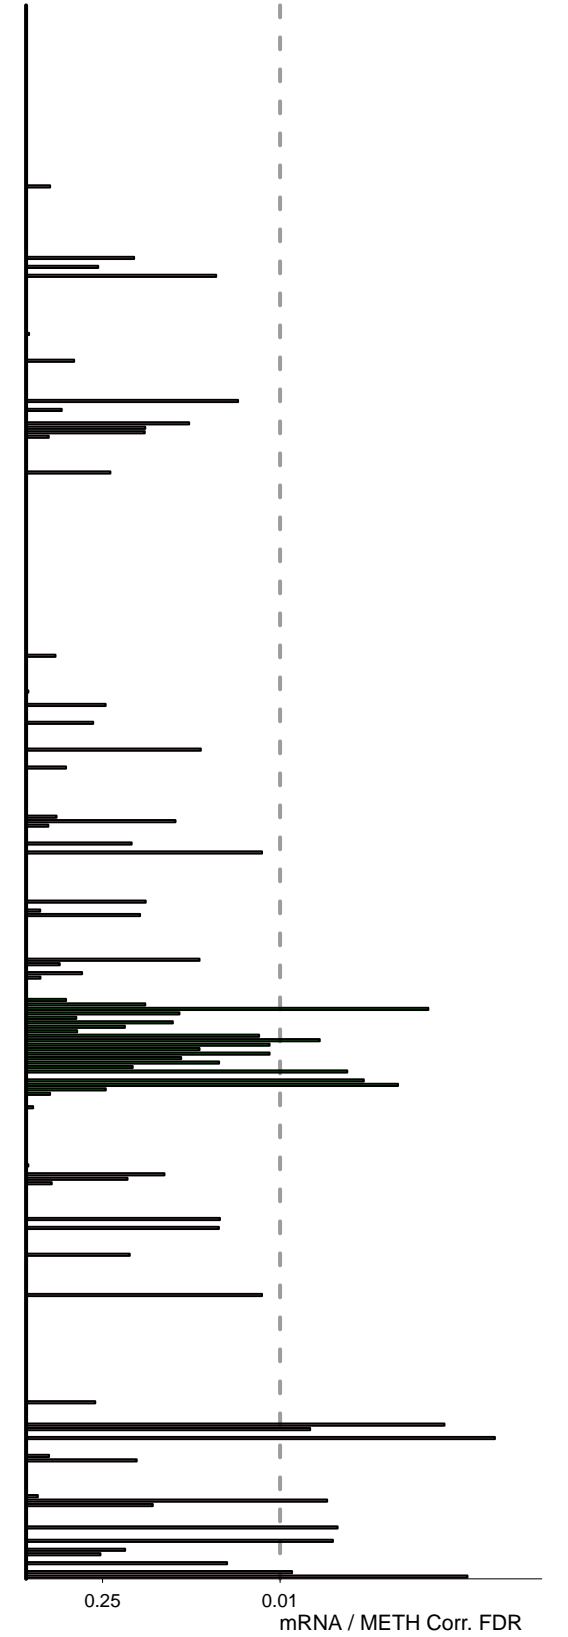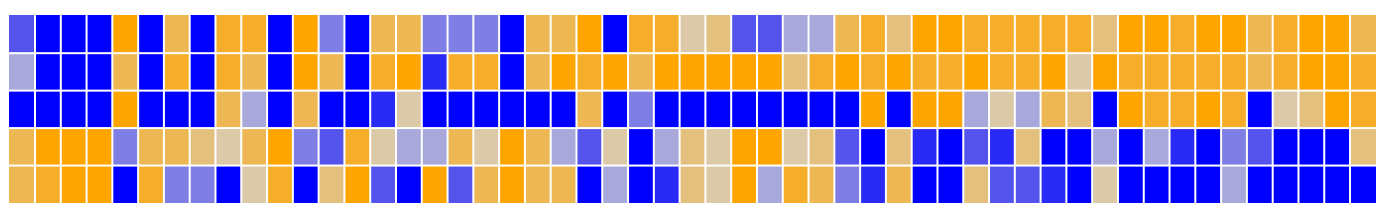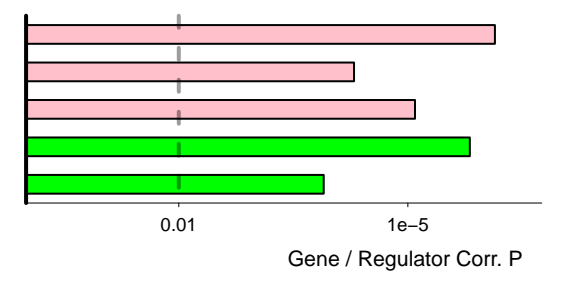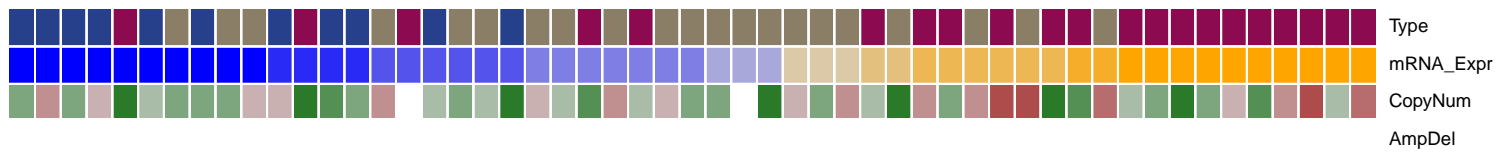

S2583  
S2470  
S2356  
S2770A  
S2765  
S2338  
S2380  
S2686  
S2596  
S2381  
S2261  
S2718  
S2405  
S2688  
S2333  
S2667  
S2731  
S2645  
S2654  
S2125  
S2423  
S2410  
S2406  
S2549  
S2373  
S2734  
S2365  
S2767  
S2350  
S2495  
S2800  
S2650  
S2392  
S2330  
S2153  
S2521  
S2391  
S2097  
S2668  
S2247  
S2508  
S2357  
S2812  
S2374  
S2216  
S2510  
S2408  
S2320  
S2761  
S2189  
S2279  
S2400  
S2379

# CA14

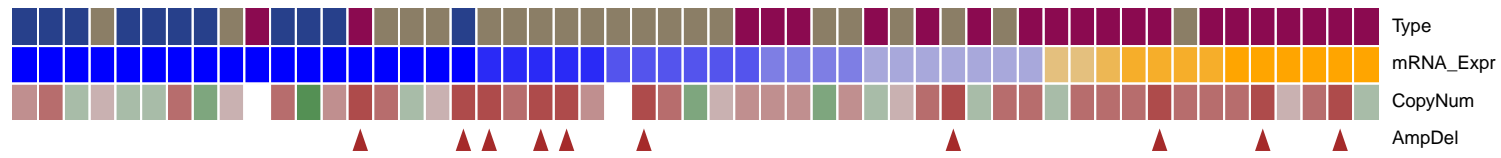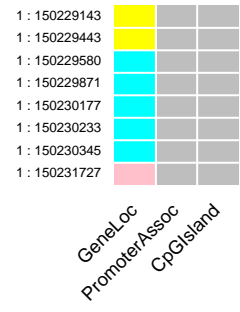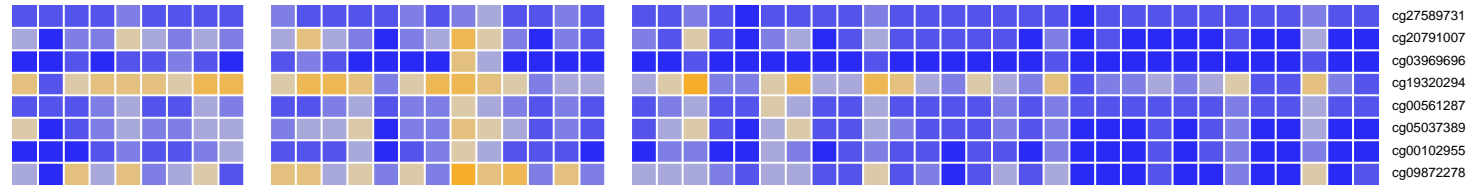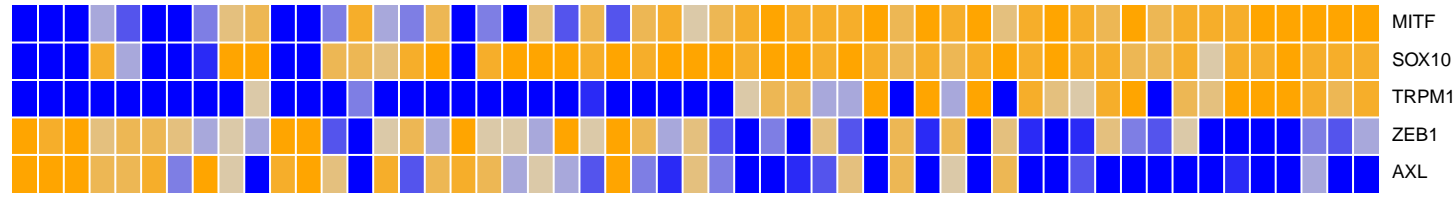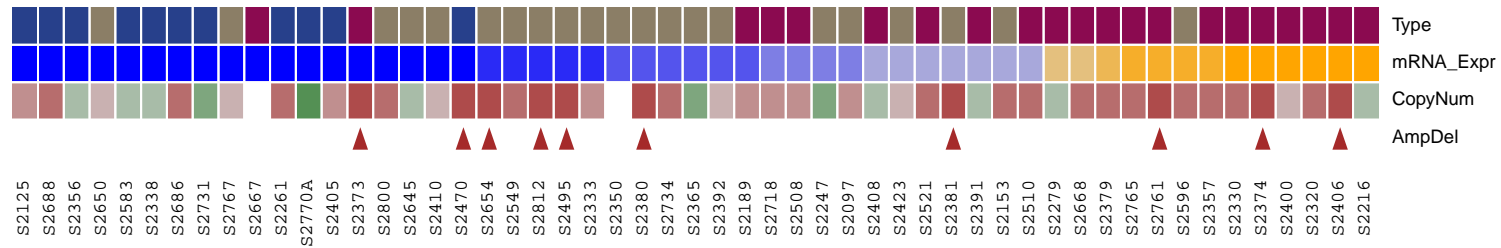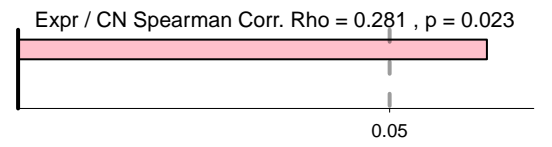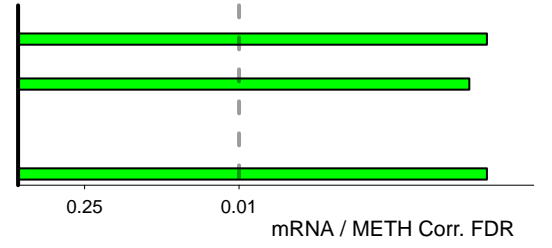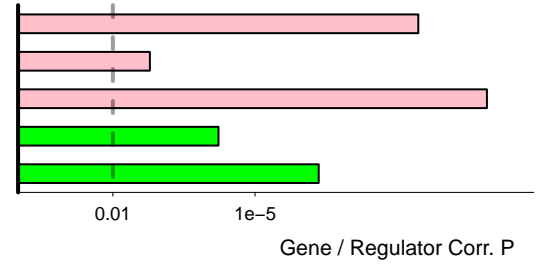

# TRIM2

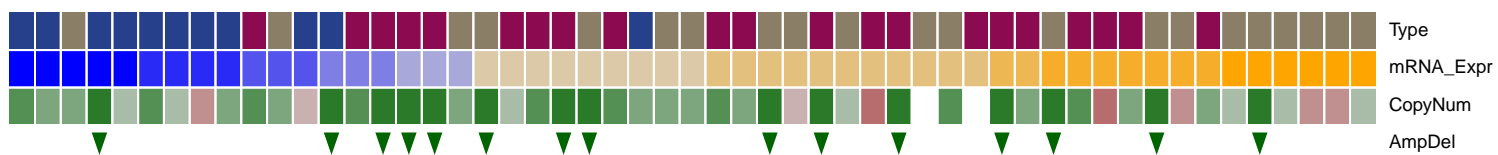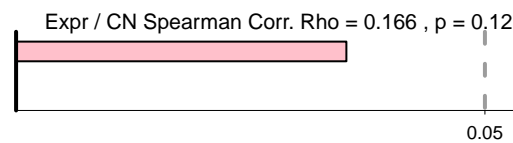

- 4: 154073371
- 4: 154073480
- 4: 154073501
- 4: 154073616
- 4: 154073709
- 4: 154073813
- 4: 154073915
- 4: 154074021
- 4: 154074121
- 4: 154074124
- 4: 154074127
- 4: 154074145
- 4: 154074155
- 4: 154074259
- 4: 154074387
- 4: 154074737
- 4: 154075044
- 4: 154075471
- 4: 154077609
- 4: 154092267
- 4: 154124584
- 4: 154125208
- 4: 154125374
- 4: 154125439
- 4: 154125453
- 4: 154125535
- 4: 154125594
- 4: 154125637
- 4: 154125681
- 4: 154125720
- 4: 154126481
- 4: 154137795
- 4: 154142712
- 4: 154143694
- 4: 154143948
- 4: 154144286
- 4: 154144462
- 4: 154144800
- 4: 154147841
- 4: 154155288
- 4: 154167187
- 4: 154169814
- 4: 154170410
- 4: 154170538
- 4: 154170590
- 4: 154170684
- 4: 154170783
- 4: 154170822
- 4: 154174325
- 4: 154178277
- 4: 154179401
- 4: 154213836
- 4: 154216637
- 4: 154216917
- 4: 154217214
- 4: 154218350
- 4: 154230468
- 4: 154231075

GeneLoc  
PromoterAssoc  
CpGIsland

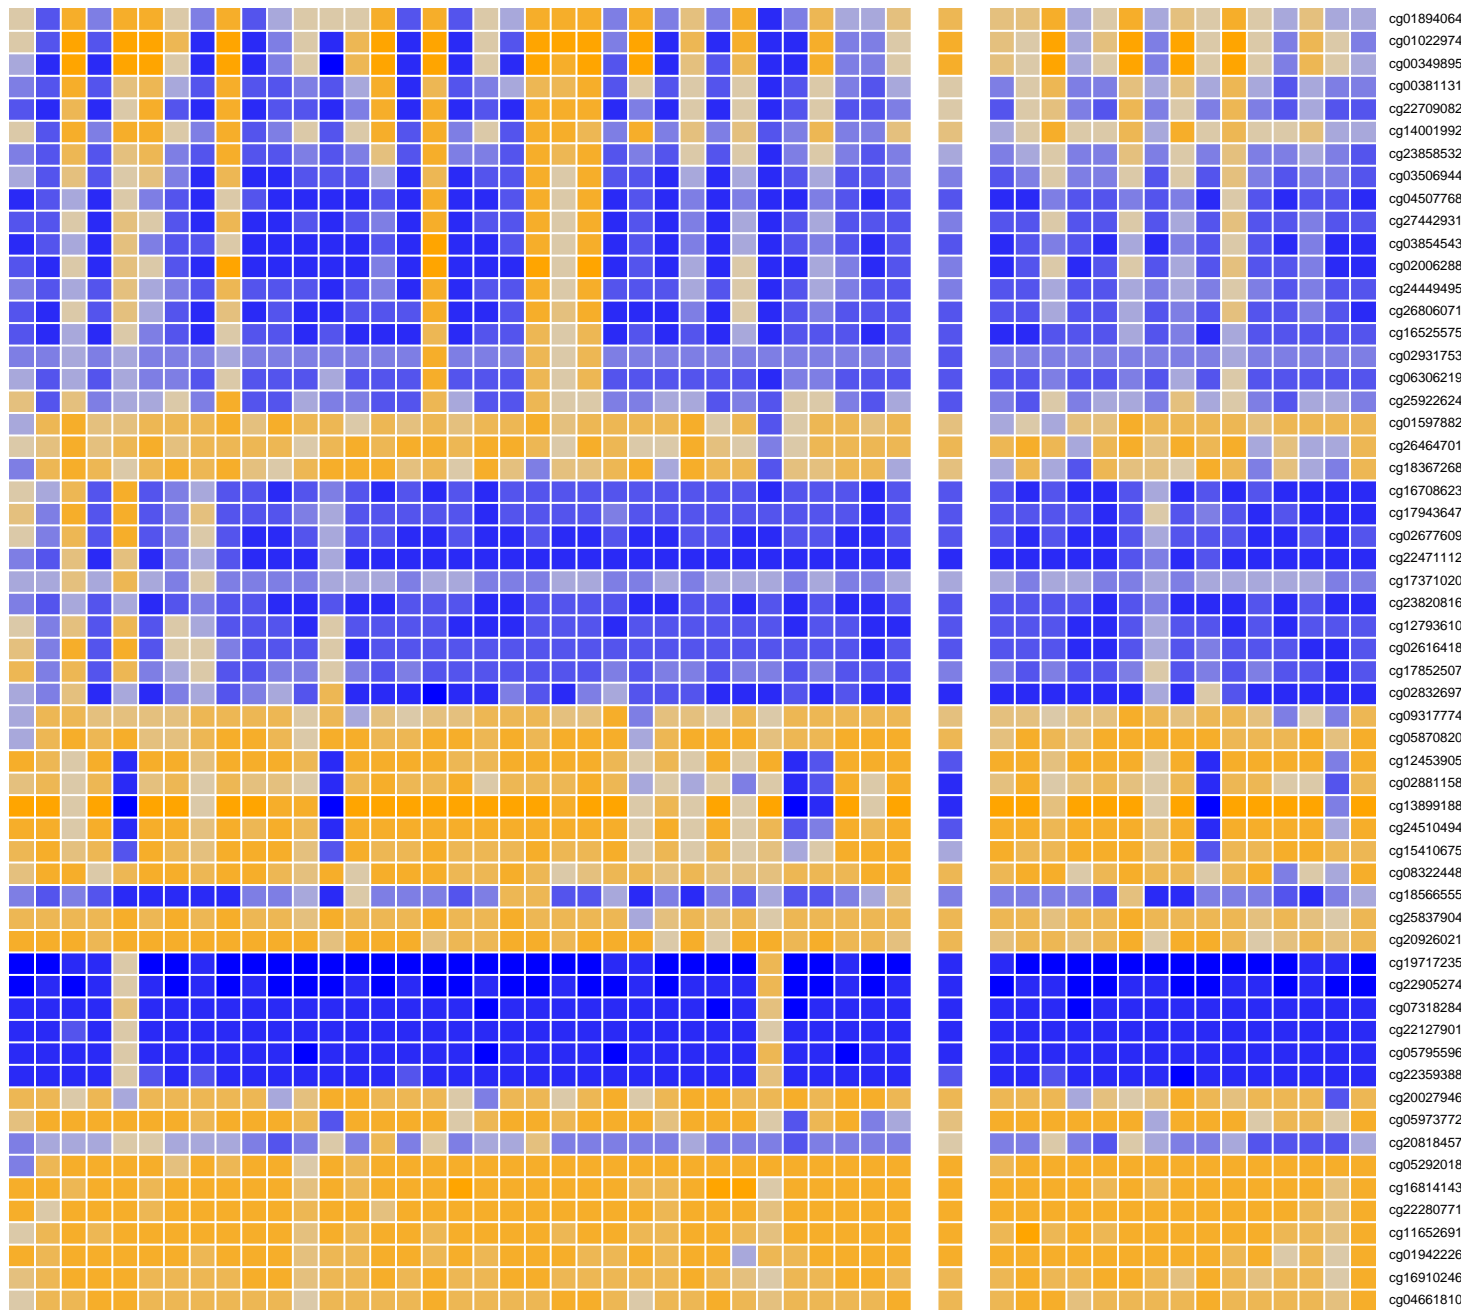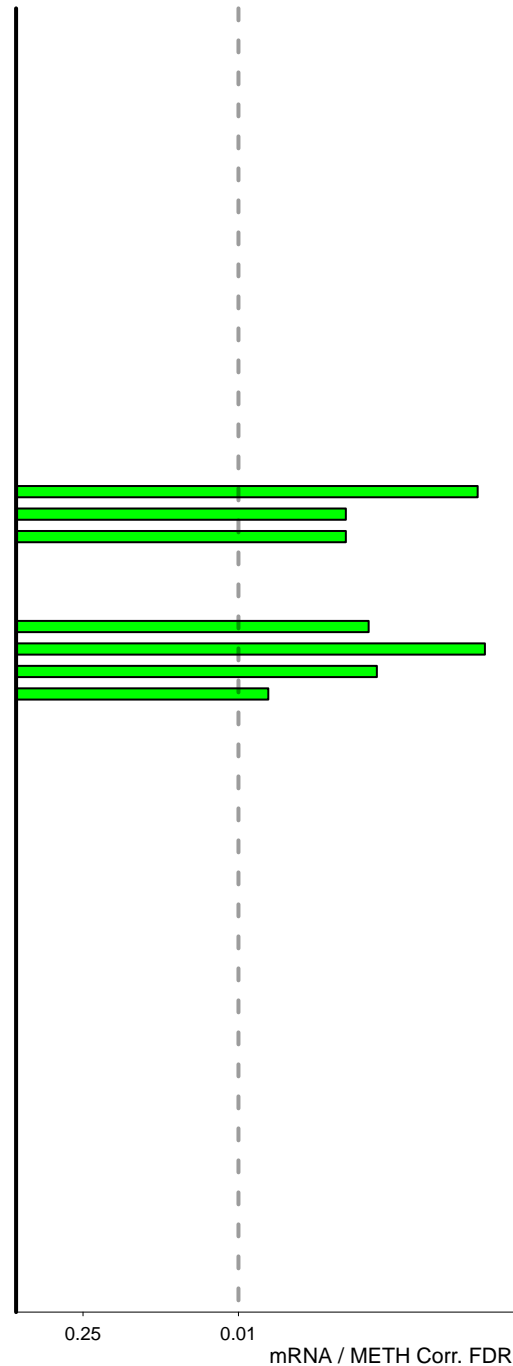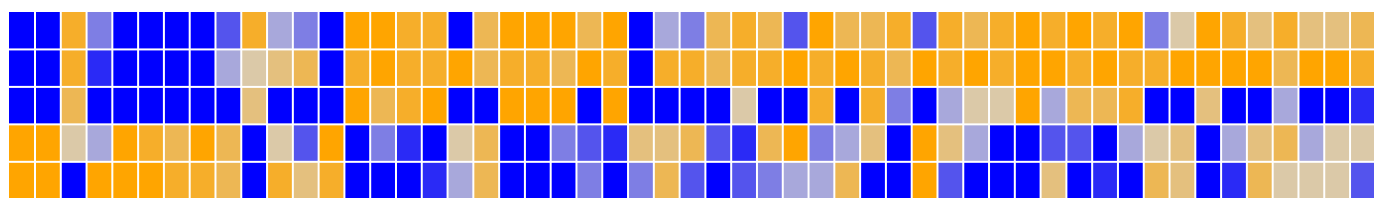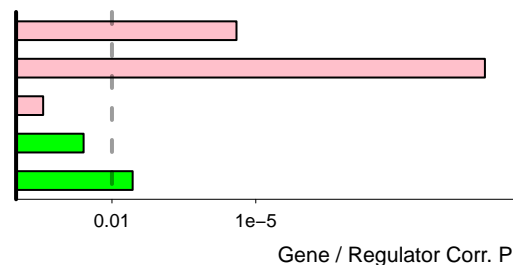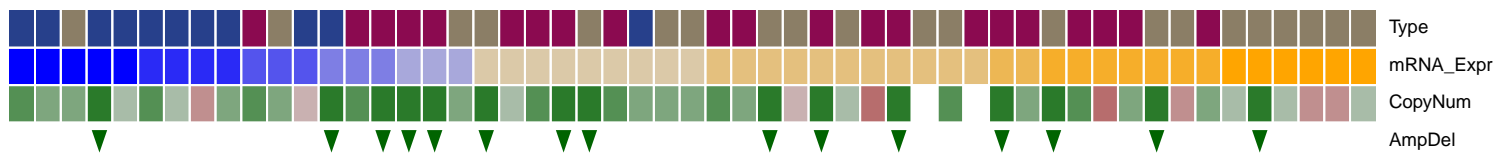

- S2770A
- S2356
- S2596
- S2731
- S2125
- S2688
- S2338
- S2261
- S2583
- S2357
- S2800
- S2405
- S2470
- S2374
- S2718
- S2510
- S2330
- S2549
- S2423
- S2408
- S2391
- S2765
- S2392
- S2521
- S2686
- S2650
- S2645
- S2761
- S2668
- S2380
- S2495
- S2320
- S2410
- S2379
- S2373
- S2350
- S2247
- S2667
- S2189
- S2400
- S2097
- S2406
- S2508
- S2216
- S2654
- S2365
- S2279
- S2734
- S2153
- S2381
- S2812
- S2767
- S2333

# APOLD1

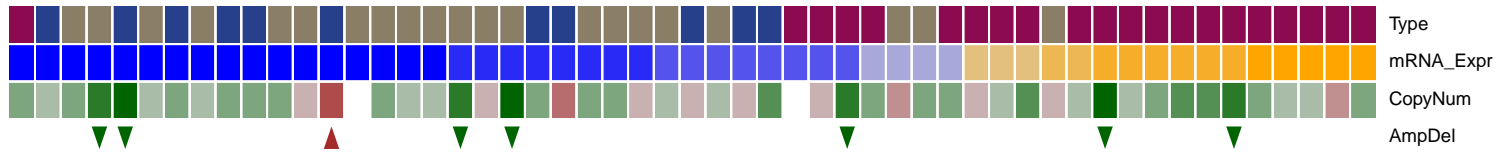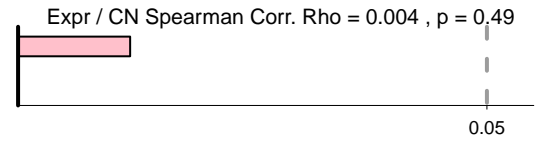

12:12879764  
12:12887740  
12:12932730  
12:12937632  
12:12938082  
12:12938161  
12:12938287  
12:12938383  
12:12938397  
12:12938425  
12:12939519  
12:12940390  
12:12940610  
12:12963527  
12:12965884  
12:12966005  
12:12966031  
12:12970188  
12:12982506

GeneLoc  
PromoterAssoc  
CpGIsland

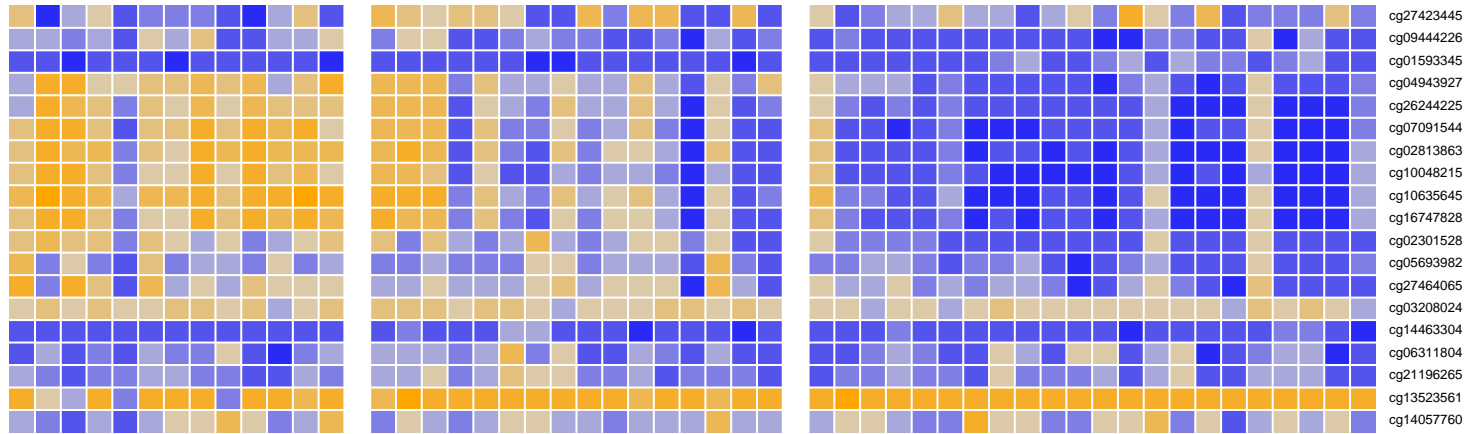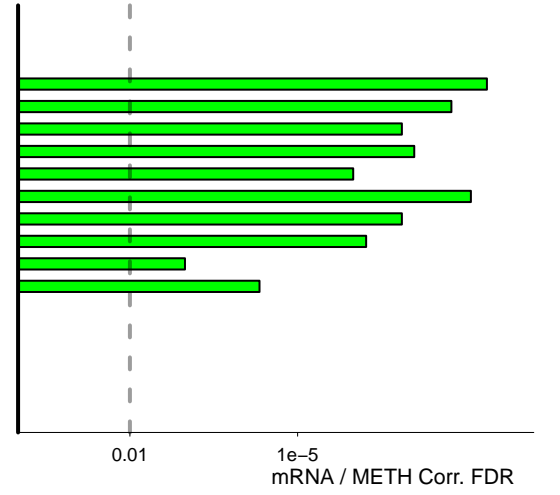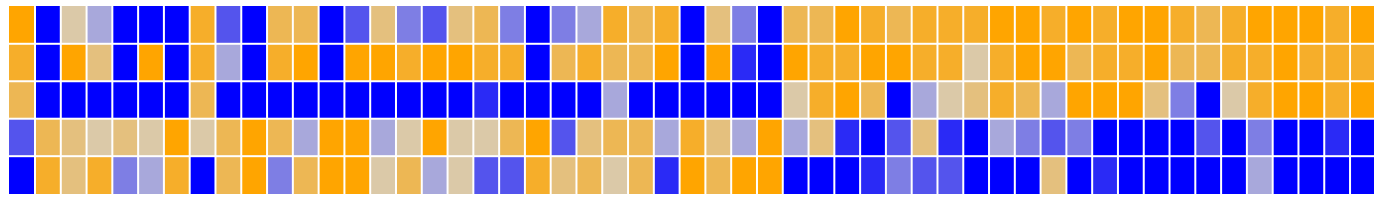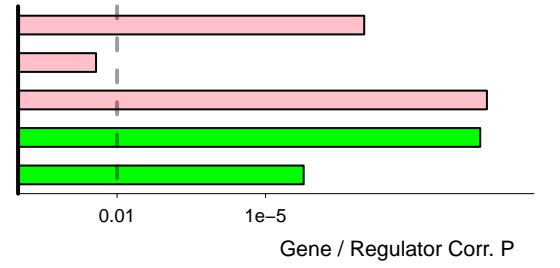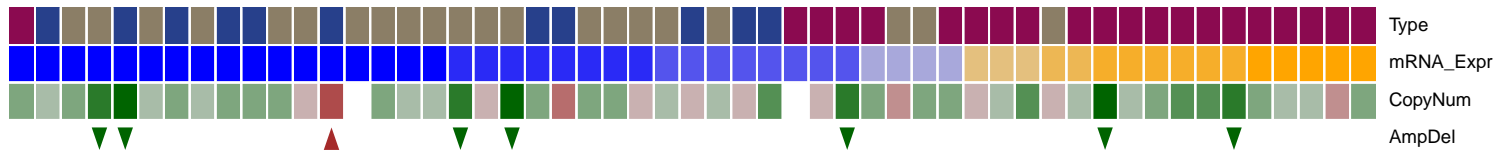

S2406  
S2338  
S2365  
S2800  
S2686  
S2549  
S2261  
S2596  
S2583  
S2356  
S2380  
S2410  
S2770A  
S2350  
S2812  
S2654  
S2495  
S2767  
S2333  
S2645  
S2470  
S2405  
S2650  
S2381  
S2423  
S2734  
S2688  
S2153  
S2731  
S2125  
S2667  
S2379  
S2521  
S2508  
S2392  
S2247  
S2668  
S2357  
S2216  
S2718  
S2097  
S2765  
S2330  
S2408  
S2279  
S2373  
S2761  
S2189  
S2320  
S2400  
S2391  
S2510  
S2374

Type  
mRNA\_Expr  
CopyNum  
AmpDel



# ITGA9

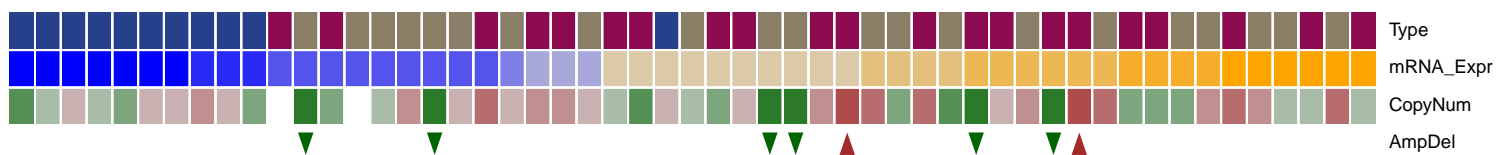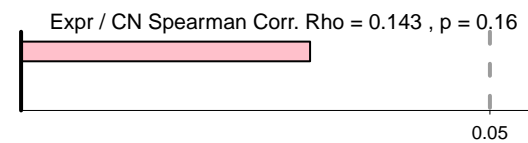

- 3 : 37493436
- 3 : 37493945
- 3 : 37493949
- 3 : 37494403
- 3 : 37494485
- 3 : 37494602
- 3 : 37495166
- 3 : 37495654
- 3 : 37497632
- 3 : 37498950
- 3 : 37562371
- 3 : 37600159
- 3 : 37760790
- 3 : 37804282
- 3 : 37807439
- 3 : 37807702
- 3 : 37814797
- 3 : 37823949
- 3 : 37848209
- 3 : 37853862
- 3 : 37860954

GeneLoc  
PromoterAssoc  
CpGIsland

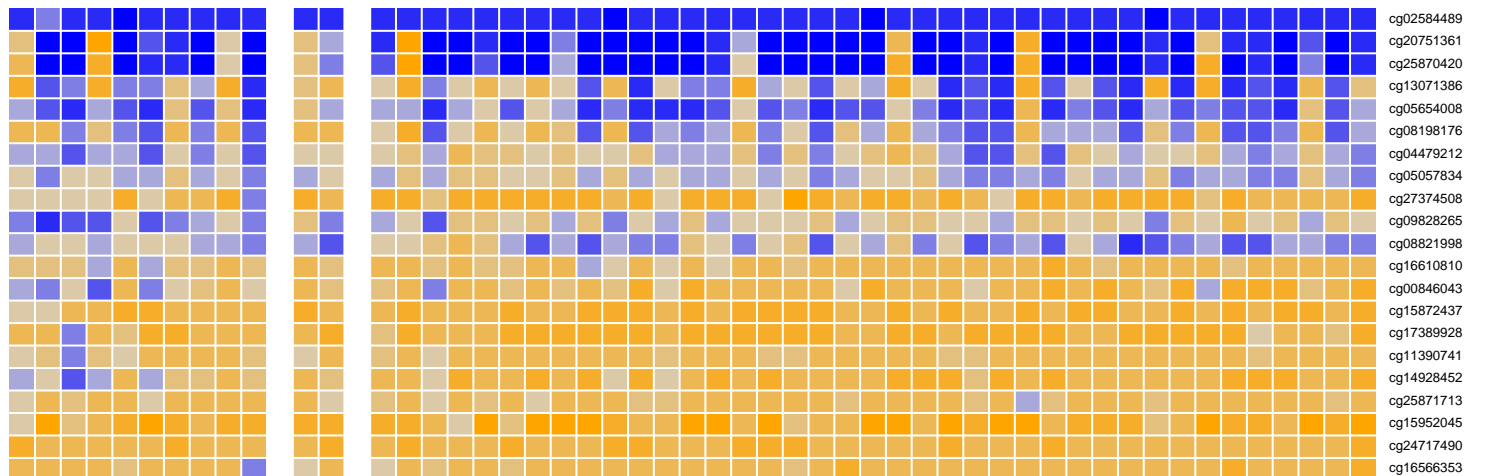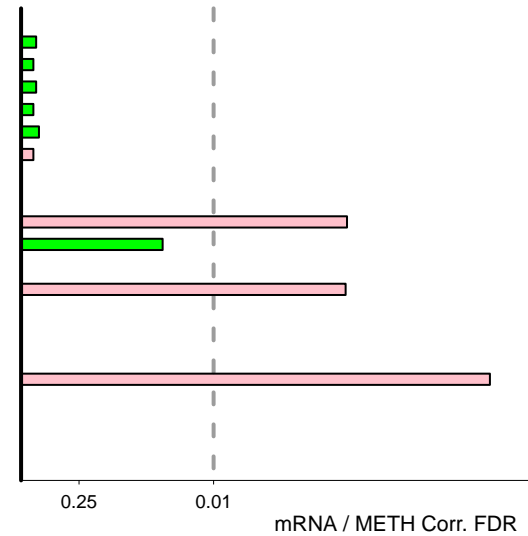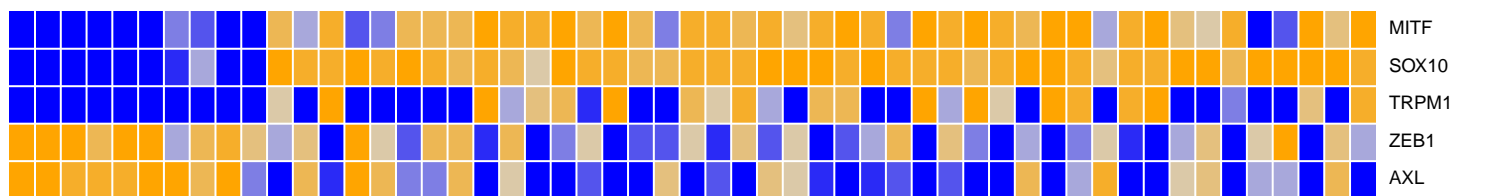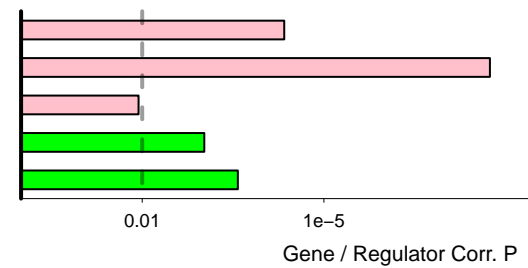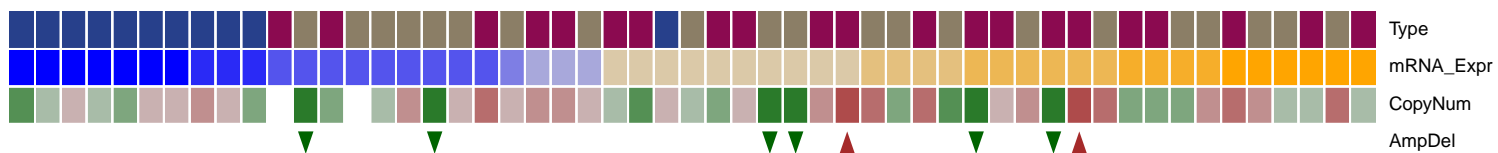

- S2770A
- S2356
- S2470
- S2338
- S2261
- S2125
- S2731
- S2583
- S2688
- S2686
- S2667
- S2650
- S2330
- S2350
- S2654
- S2392
- S2380
- S2423
- S2521
- S2381
- S2357
- S2718
- S2333
- S2408
- S2761
- S2405
- S2596
- S2668
- S2379
- S2097
- S2767
- S2508
- S2406
- S2734
- S2645
- S2391
- S2247
- S2765
- S2189
- S2410
- S2400
- S2320
- S2800
- S2510
- S2374
- S2812
- S2365
- S2373
- S2549
- S2495
- S2279
- S2153
- S2216

# CHCHD10

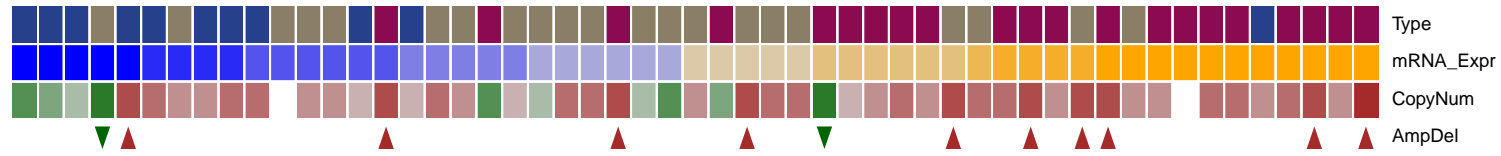

22:24110805  
22:24110355  
22:24110129  
22:24110105  
22:24108140

GeneLoc  
PromoterAssoc  
CpGIsland

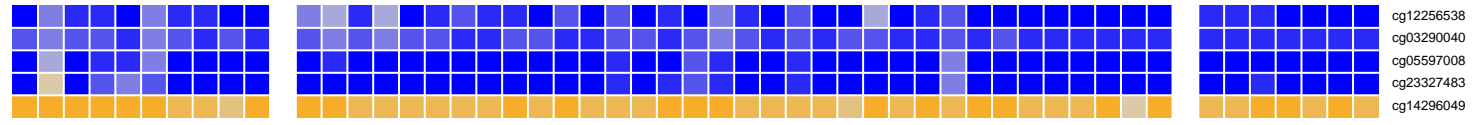

cg12256538  
cg03290040  
cg05597008  
cg23327483  
cg14296049

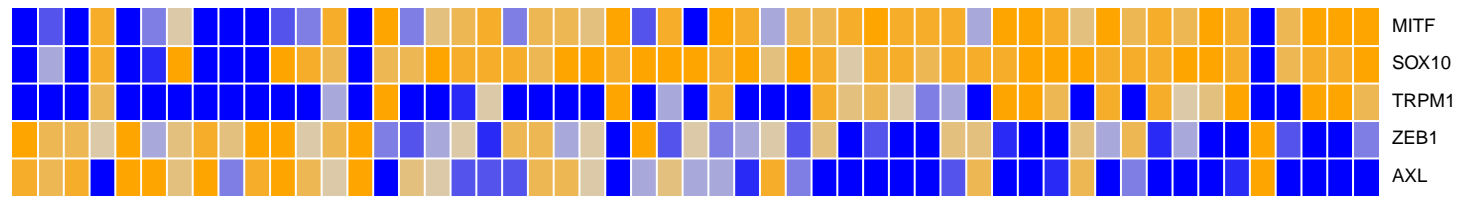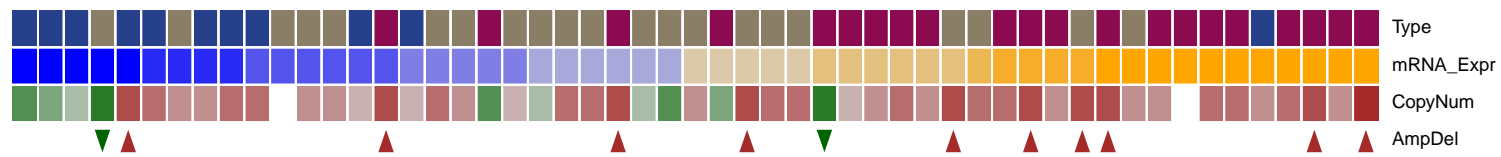

S2261  
S2583  
S2338  
S2596  
S2125  
S2731  
S2365  
S2688  
S2686  
S2470  
S2350  
S2654  
S2381  
S2356  
S2765  
S2405  
S2812  
S2333  
S2668  
S2645  
S2423  
S2410  
S2767  
S2391  
S2495  
S2097  
S2549  
S2320  
S2734  
S2800  
S2392  
S2379  
S2357  
S2406  
S2189  
S2373  
S2247  
S2650  
S2521  
S2400  
S2508  
S2153  
S2216  
S2380  
S2510  
S2667  
S2279  
S2330  
S2770A  
S2761  
S2408  
S2374  
S2718

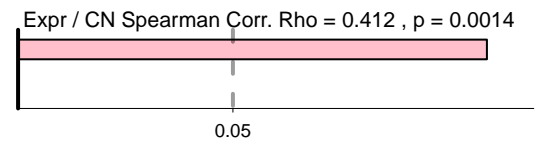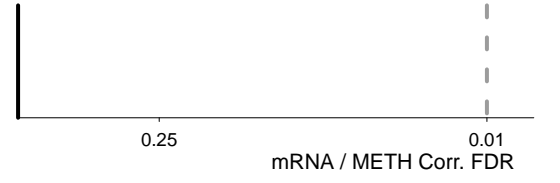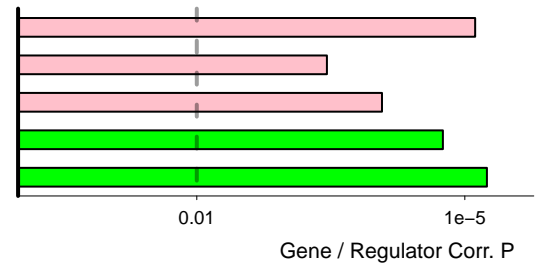

# GPR143

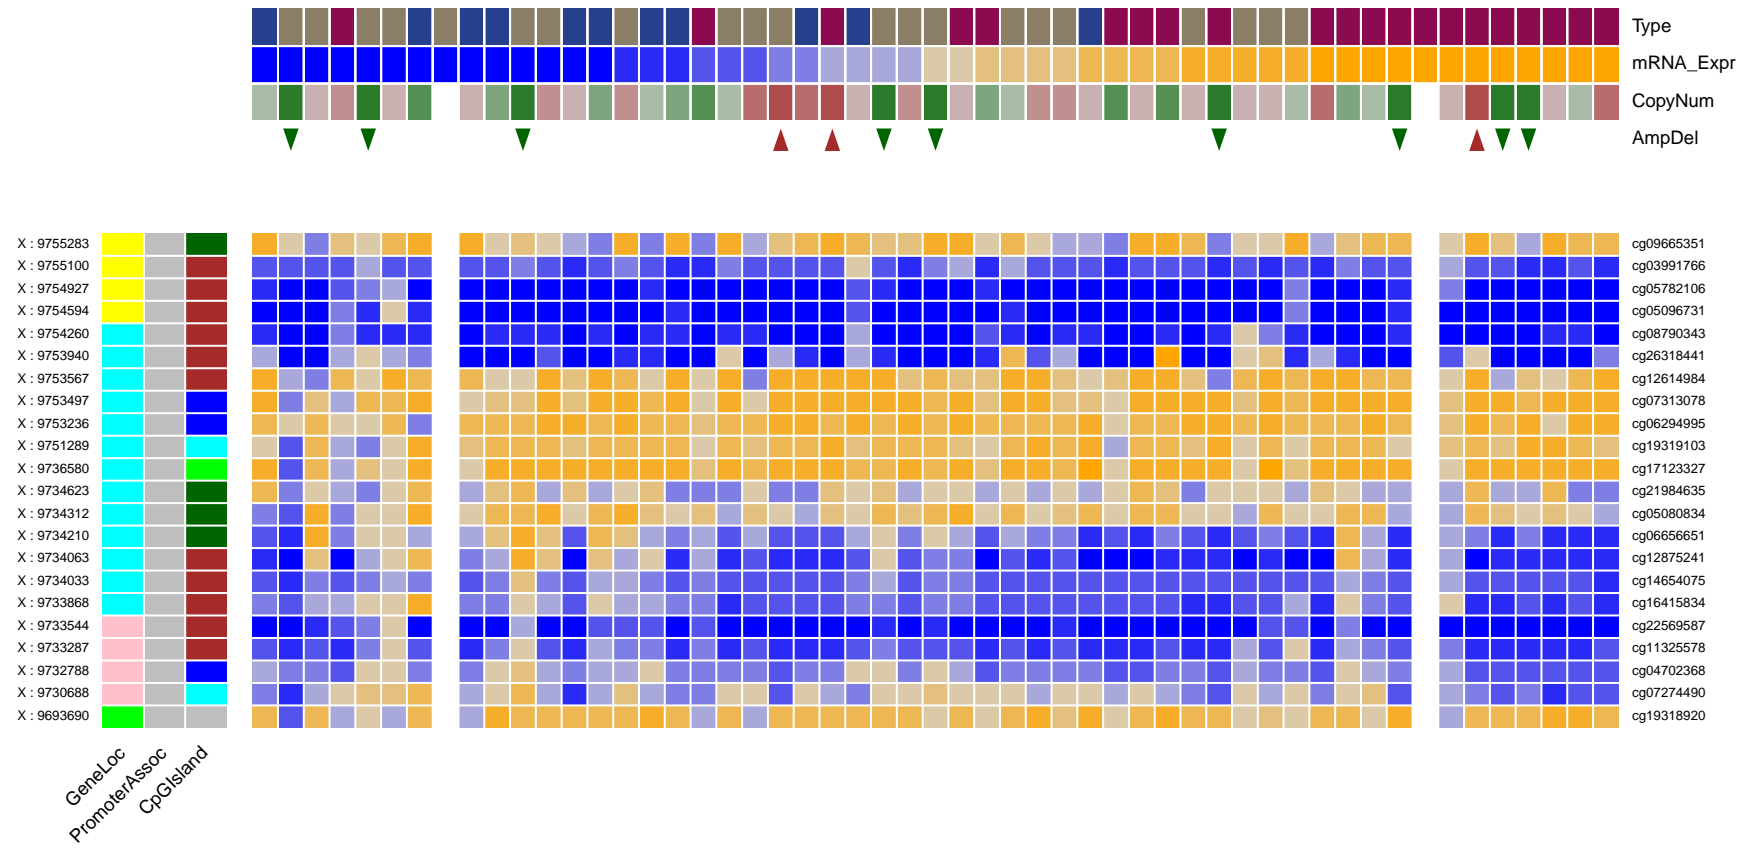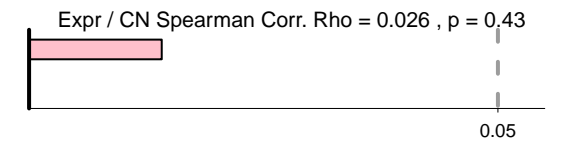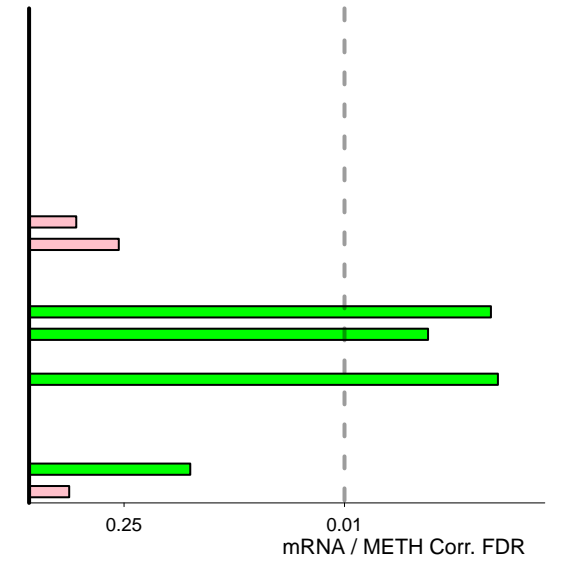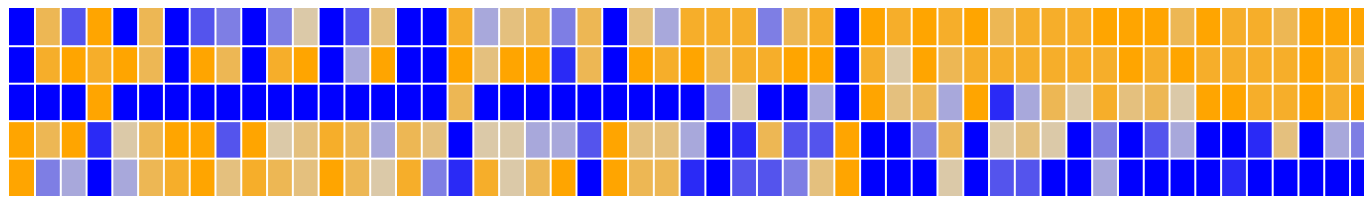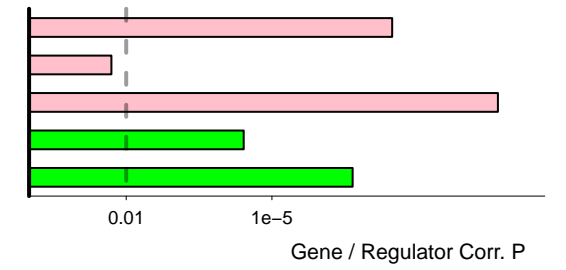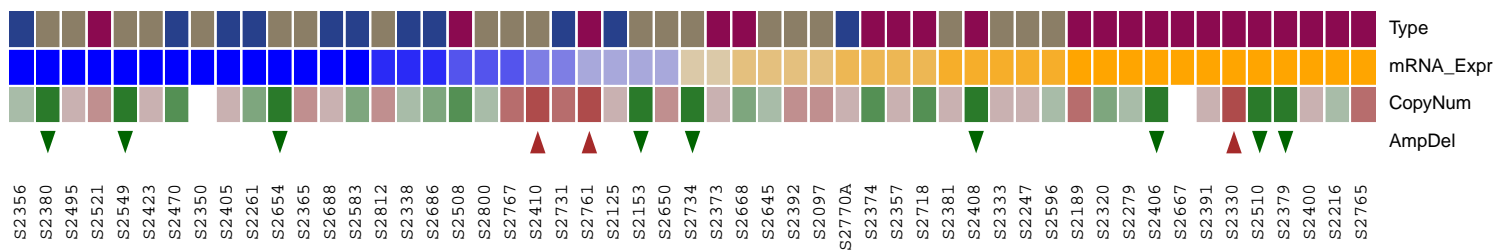

# ST6GALNAC3

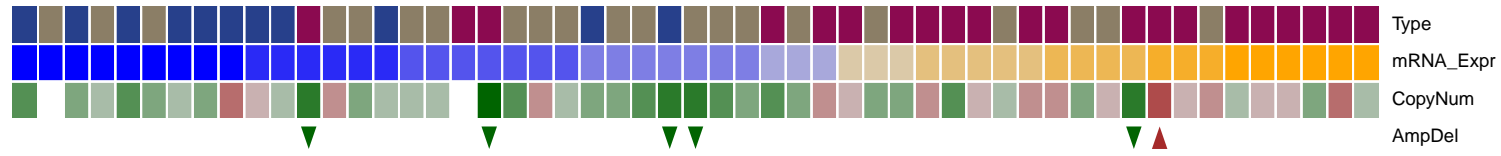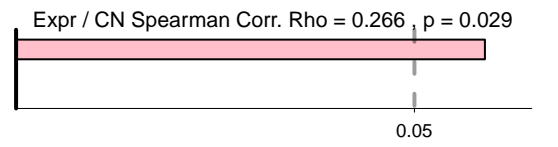

1:76539186  
1:76540110  
1:76540148  
1:76540168  
1:76540222  
1:76540236  
1:76540438  
1:76540465  
1:76540574  
1:76540641  
1:76540999  
1:76543815  
1:76547234  
1:76550508  
1:76556226  
1:76572603  
1:76574405  
1:76607010  
1:76620271  
1:76695186  
1:76704467  
1:76723043  
1:76734569  
1:76761200  
1:76780549  
1:76782984  
1:76817670  
1:76840032  
1:76891398  
1:76899846  
1:76968506  
1:76976572  
1:77013304  
1:77042560  
1:77043128  
1:77049380  
1:77096137

GeneLoc  
PromoterAssoc  
CpGIsland

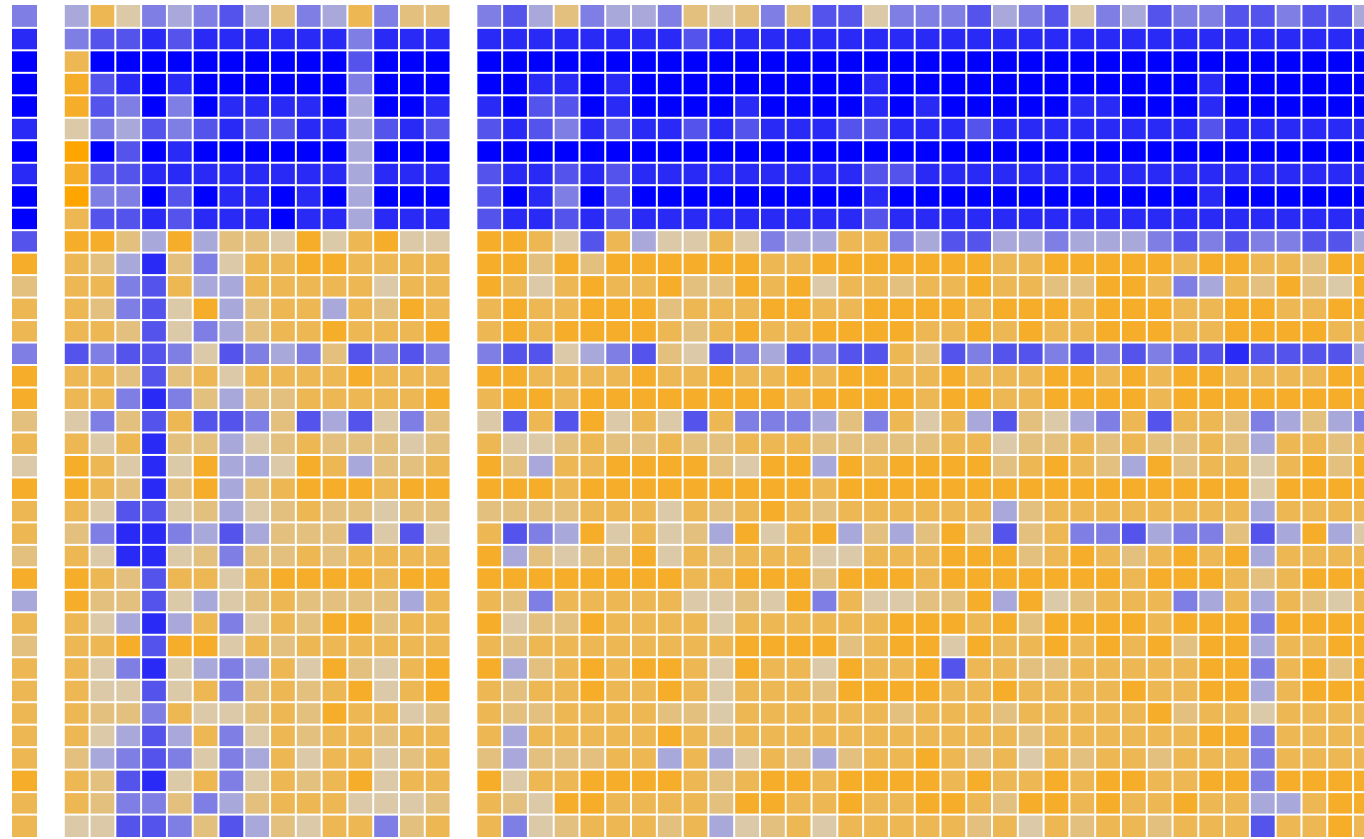

cg18877763  
cg11963676  
cg00534240  
cg15090083  
cg20707222  
cg26363196  
cg06211837  
cg12601757  
cg21526205  
cg27538686  
cg10511850  
cg07108118  
cg25312440  
cg09867656  
cg11348257  
cg25339815  
cg04841837  
cg17517997  
cg24580071  
cg15553397  
cg04490113  
cg00163462  
cg18172358  
cg09580755  
cg26256154  
cg21823733  
cg01517208  
cg10241563  
cg08869722  
cg07163168  
cg17891928  
cg21867608  
cg13434669  
cg17325792  
cg12702354  
cg00013349  
cg19748436

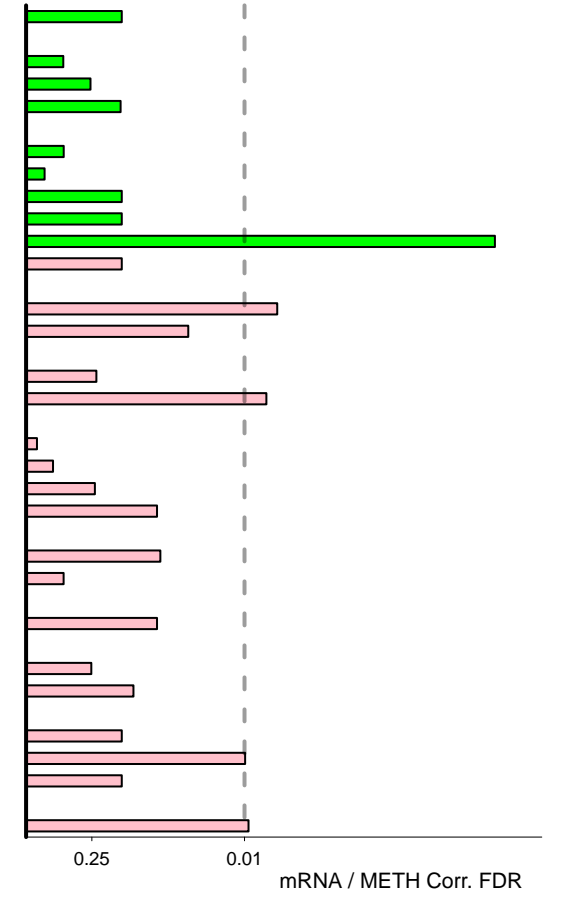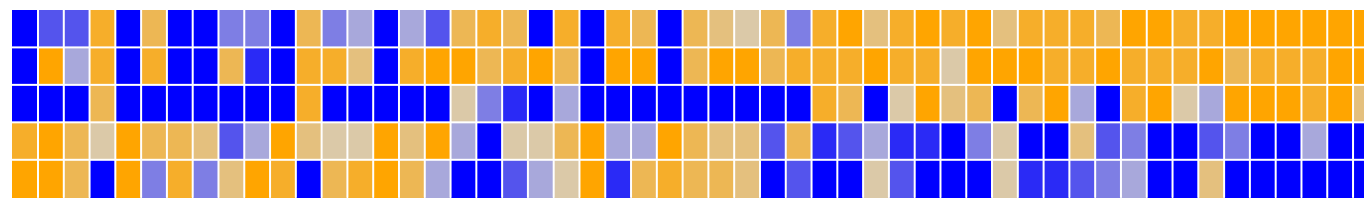

MITF  
SOX10  
TRPM1  
ZEB1  
AXL

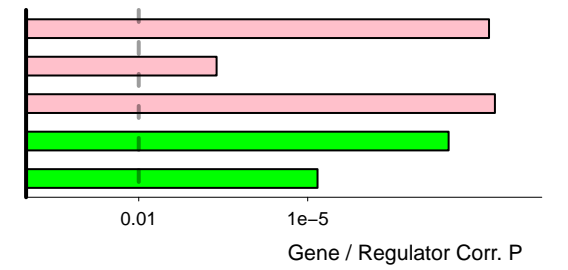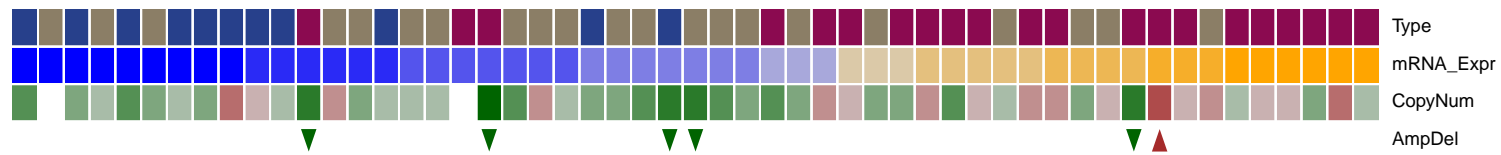

S2688  
S2350  
S2583  
S2596  
S2770A  
S2380  
S2338  
S2686  
S2405  
S2731  
S2261  
S2379  
S2654  
S2800  
S2356  
S2650  
S2495  
S2667  
S2373  
S2333  
S2549  
S2381  
S2125  
S2734  
S2410  
S2470  
S2423  
S2153  
S2365  
S2761  
S2645  
S2510  
S2406  
S2812  
S2668  
S2521  
S2357  
S2718  
S2767  
S2508  
S2330  
S2247  
S2392  
S2320  
S2408  
S2189  
S2097  
S2765  
S2374  
S2391  
S2216  
S2400  
S2279

# RAP1GAP

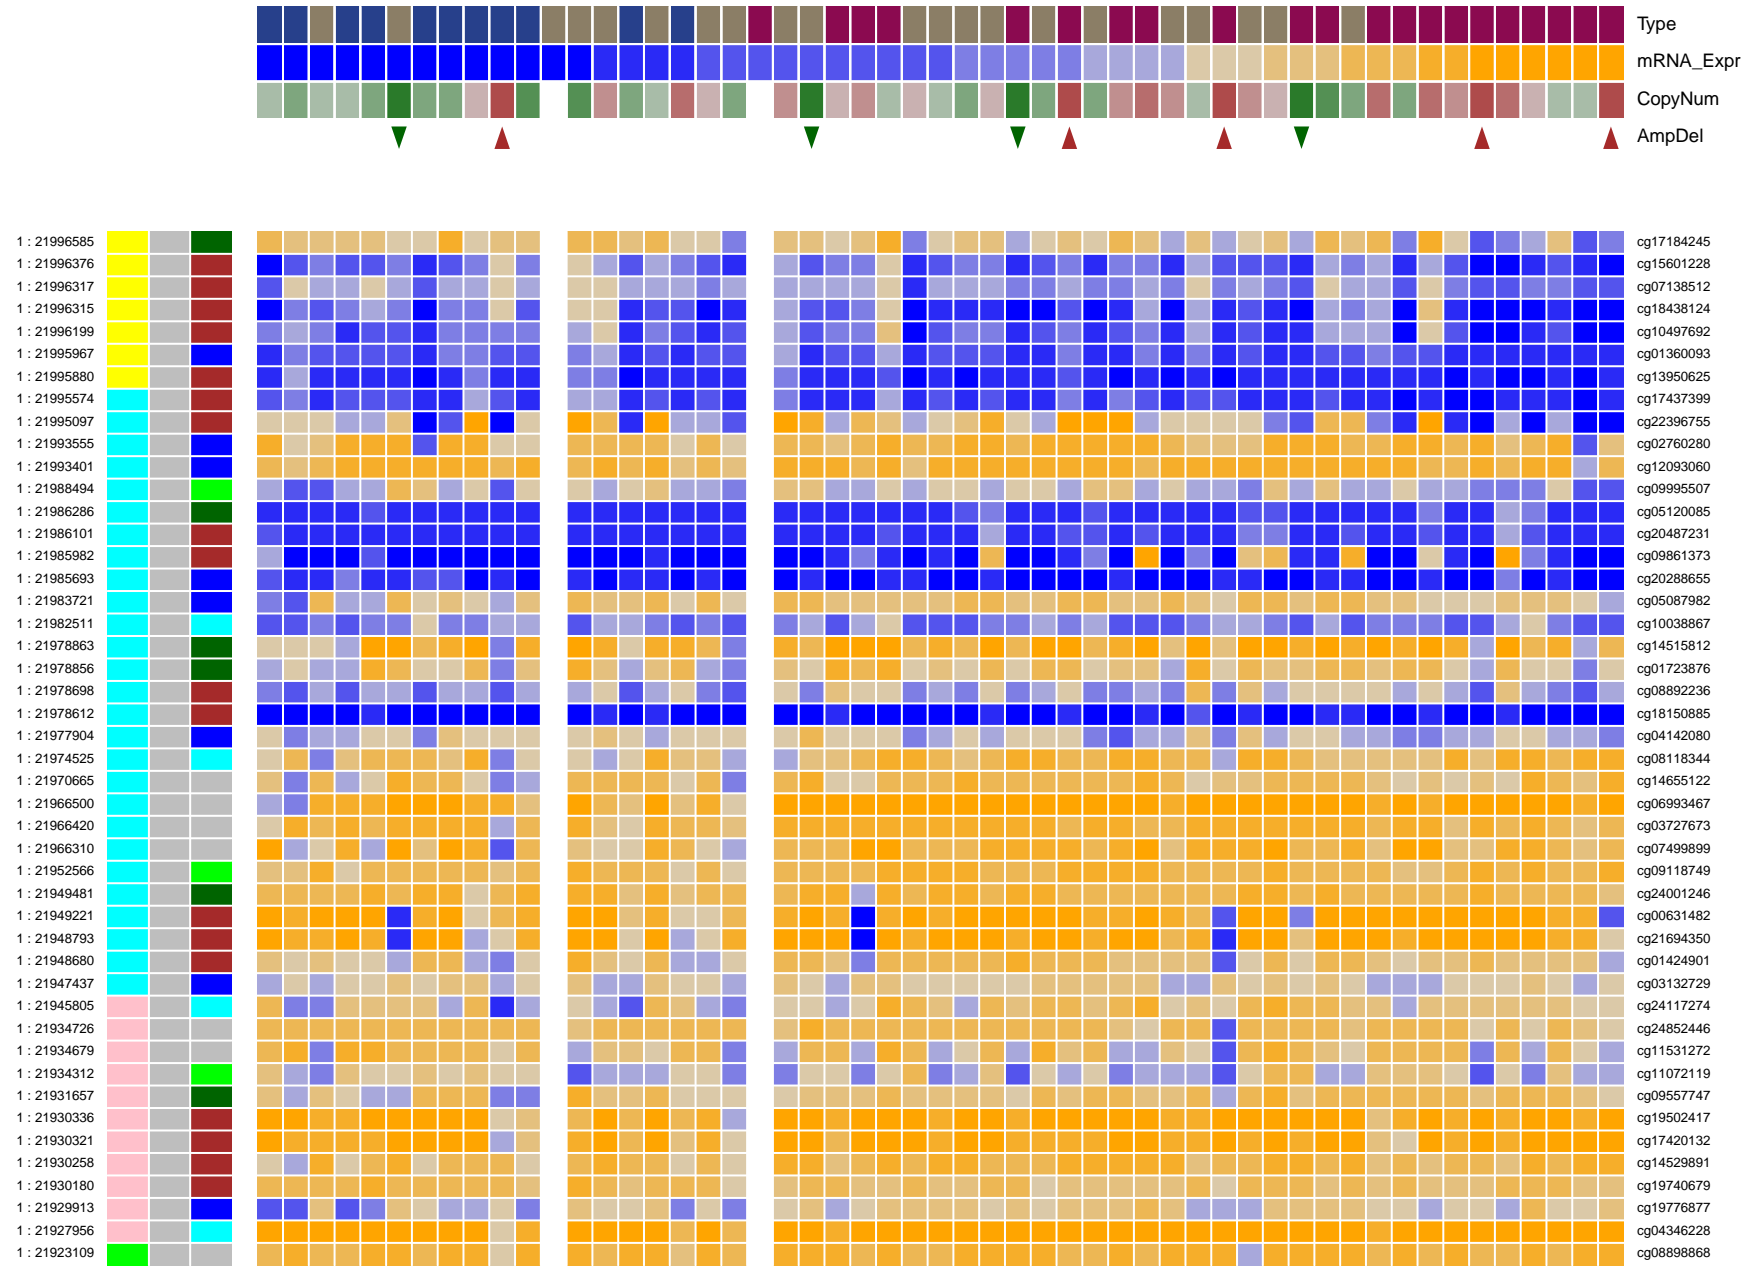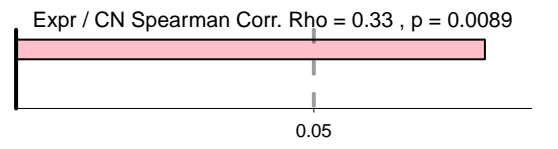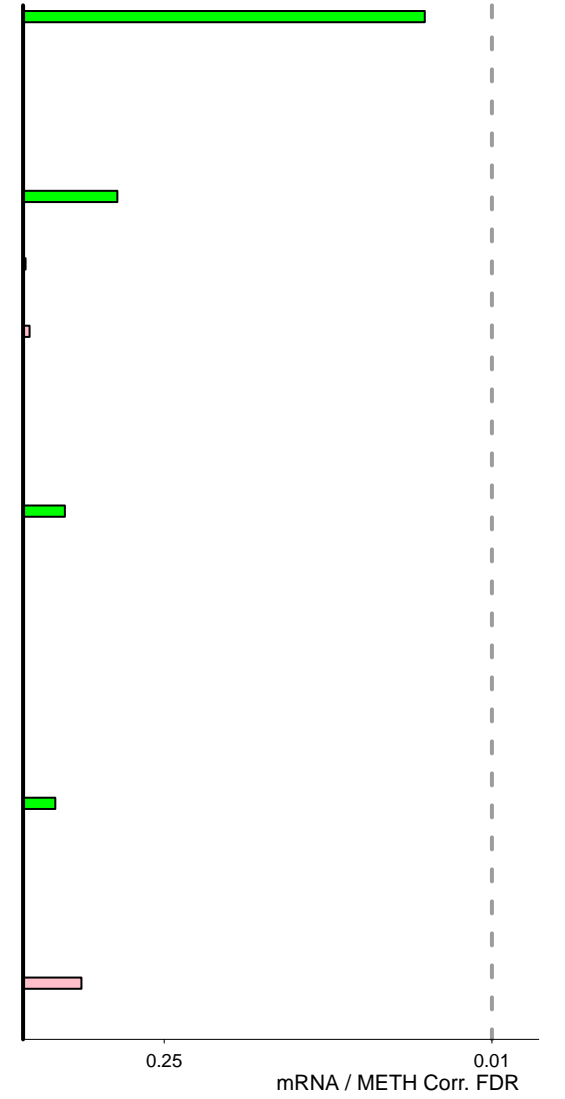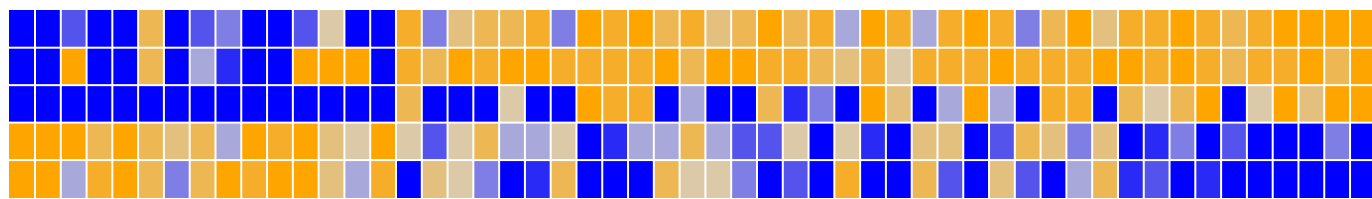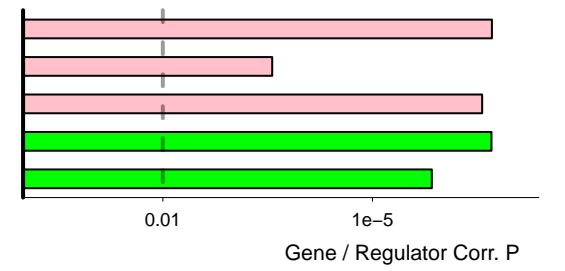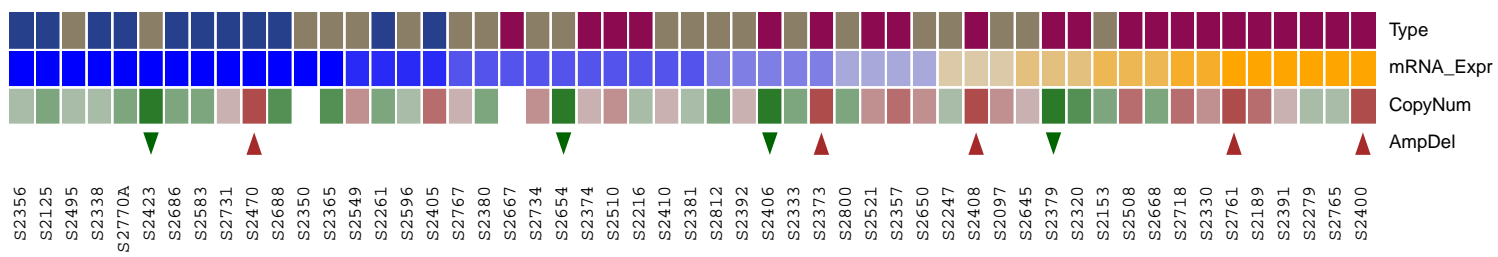

# CPVL

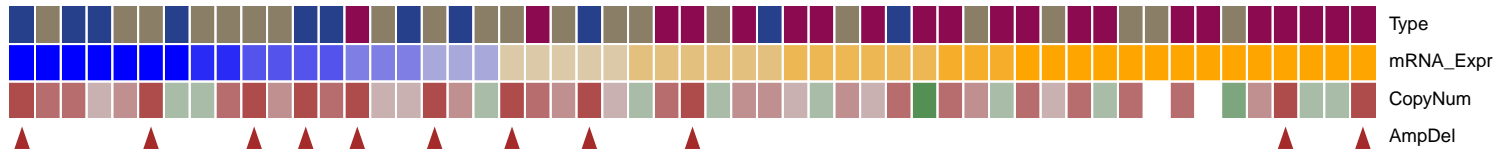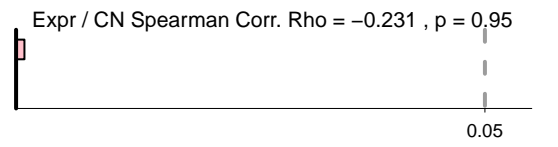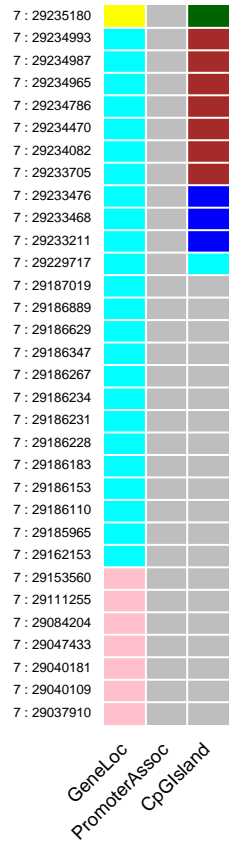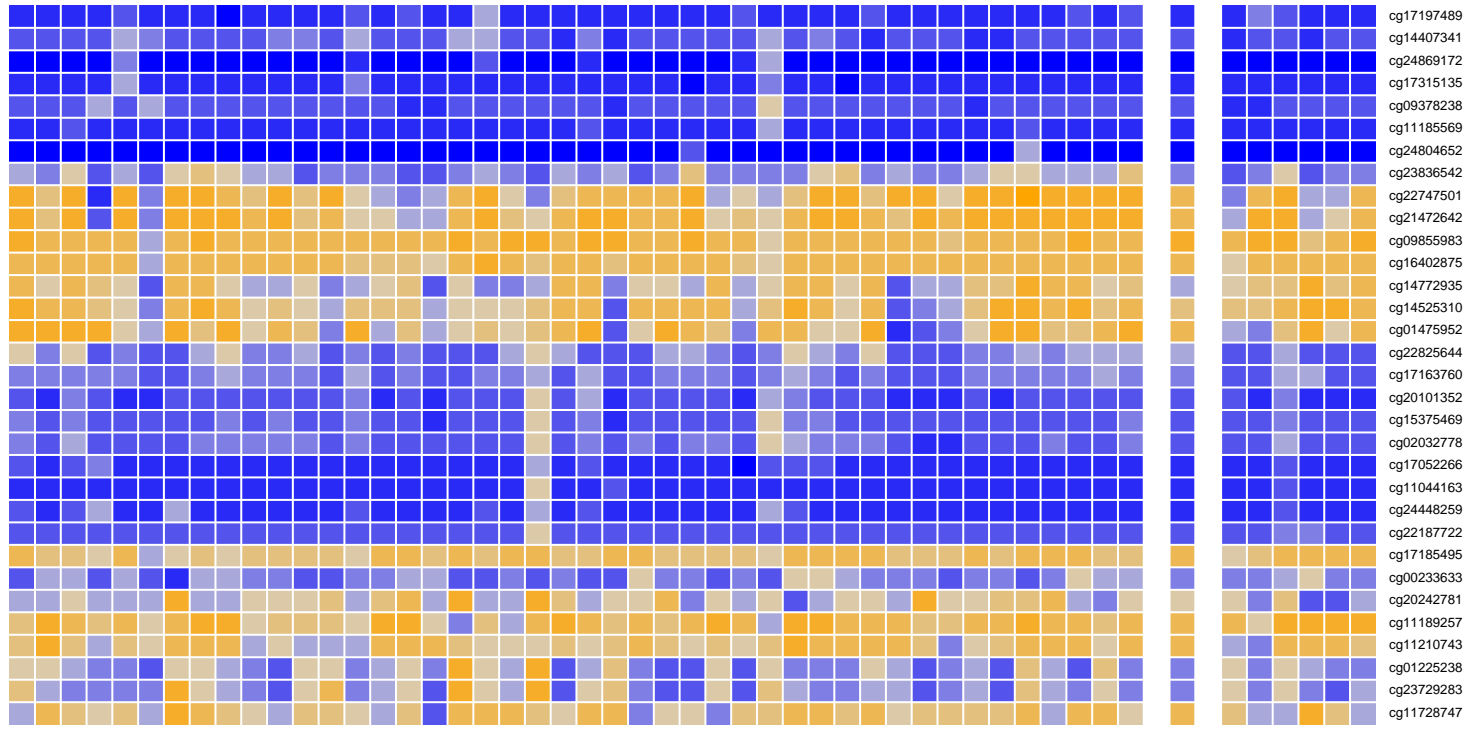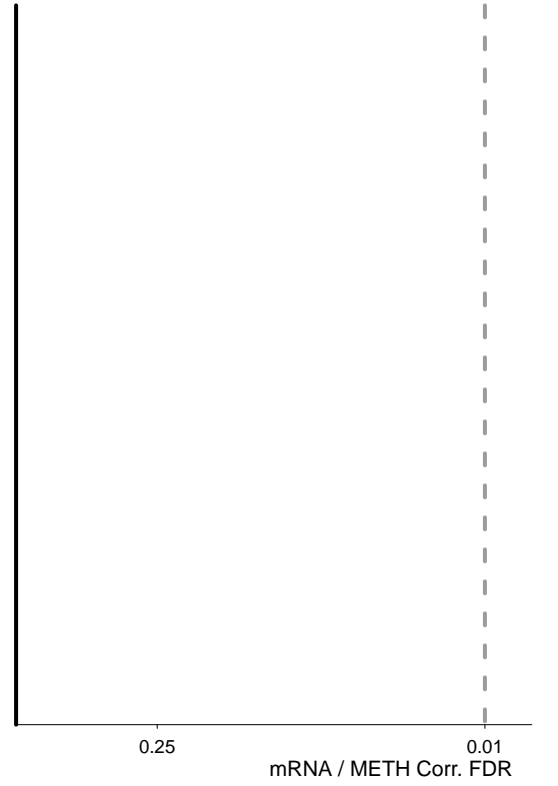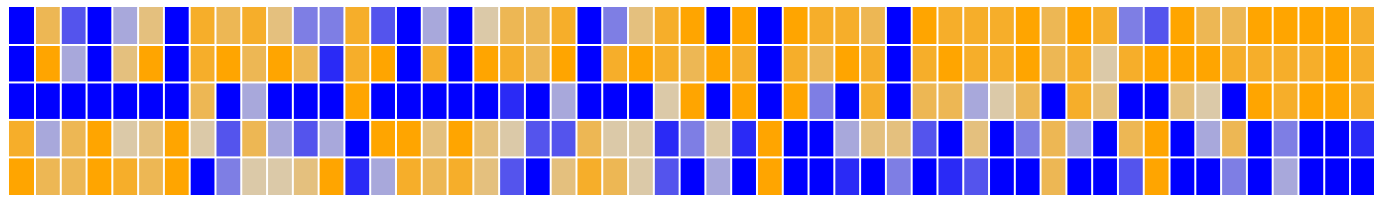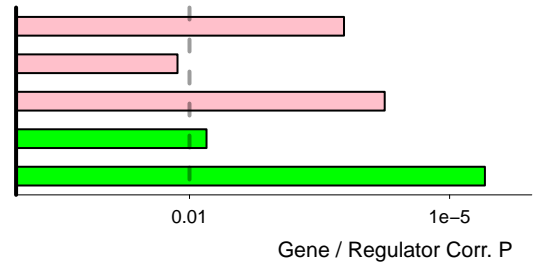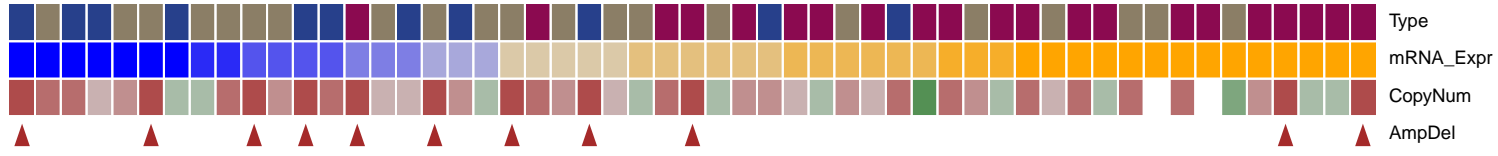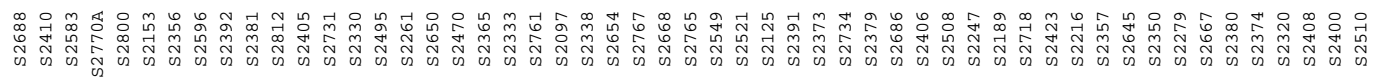

# ACP5

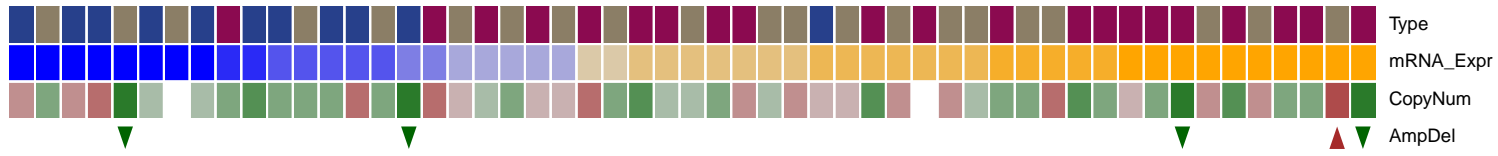

19 : 11689997  
 19 : 11689880  
 19 : 11689867  
 19 : 11689860  
 19 : 11689855  
 19 : 11689813  
 19 : 11689726  
 19 : 11689715  
 19 : 11689649  
 19 : 11689614  
 19 : 11689538  
 19 : 11689488  
 19 : 11688711  
 19 : 11688246  
 19 : 11687621  
 19 : 11685647

GeneLoc  
 PromoterAssoc  
 CpGIsland

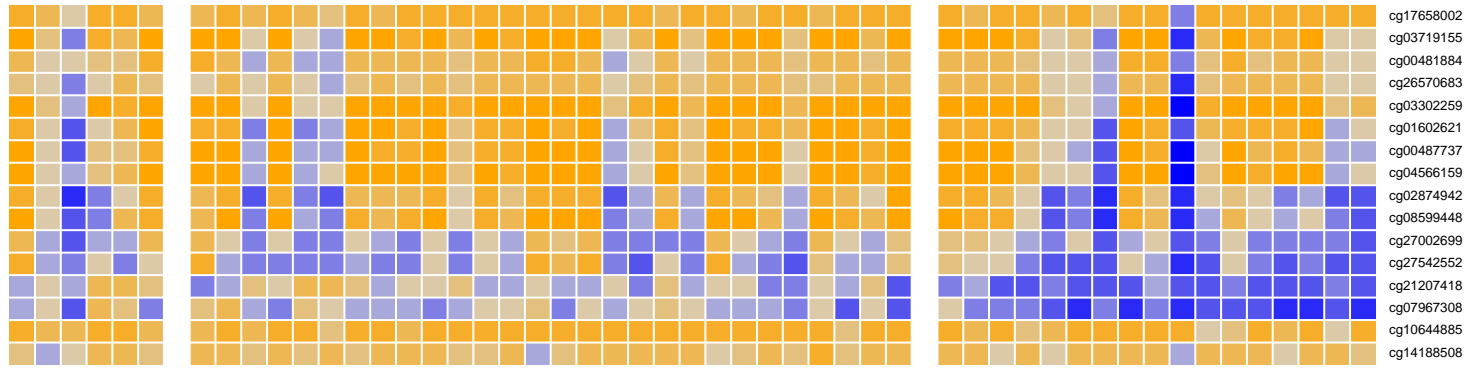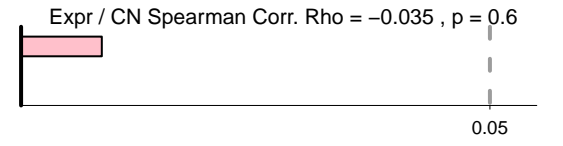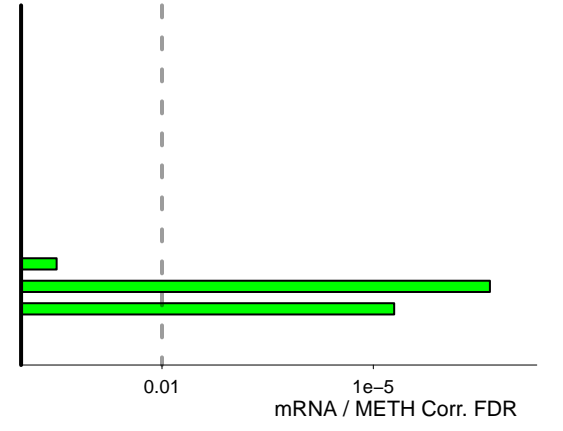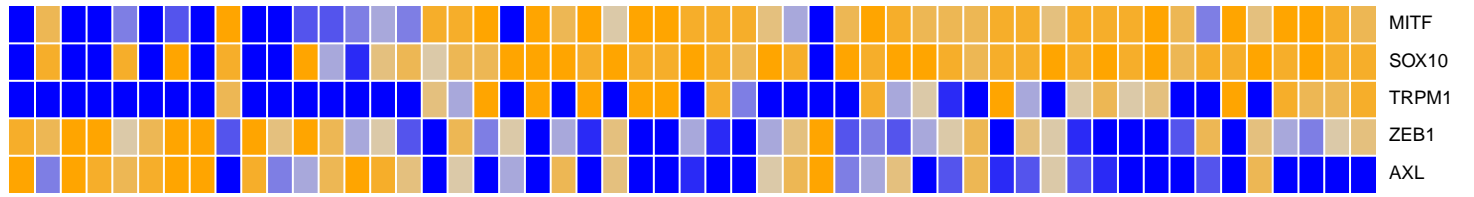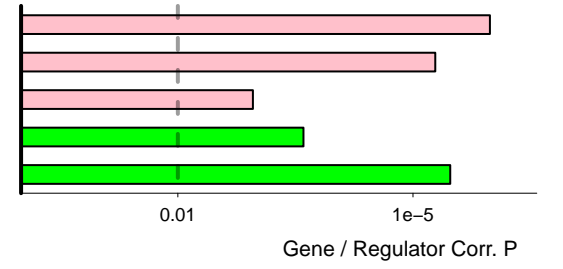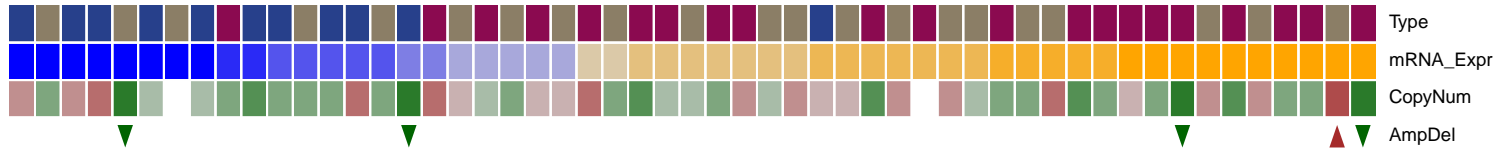

S2688  
 S2380  
 S2125  
 S2470  
 S2654  
 S2338  
 S2350  
 S2356  
 S2406  
 S2261  
 S2686  
 S2495  
 S2583  
 S2731  
 S2800  
 S2405  
 S2357  
 S2381  
 S2765  
 S2549  
 S2400  
 S2410  
 S2521  
 S2365  
 S2374  
 S2408  
 S2734  
 S2510  
 S2373  
 S2812  
 S2650  
 S2770A  
 S2392  
 S2320  
 S2097  
 S2667  
 S2333  
 S2423  
 S2330  
 S2247  
 S2767  
 S2668  
 S2508  
 S2189  
 S2279  
 S2761  
 S2645  
 S2391  
 S2153  
 S2216  
 S2718  
 S2596  
 S2379

# LZTS1

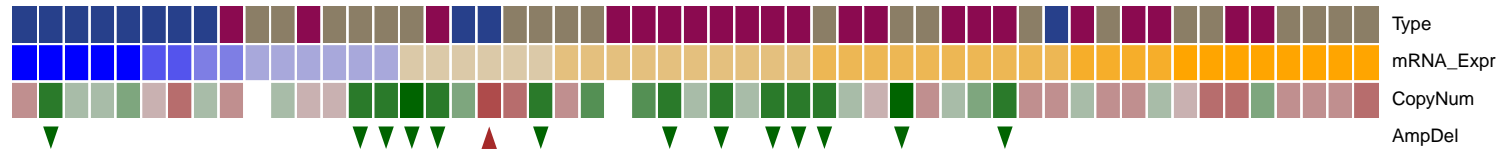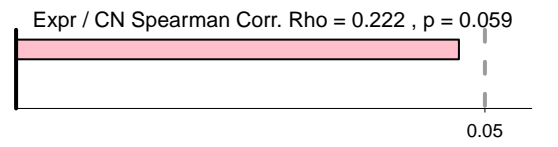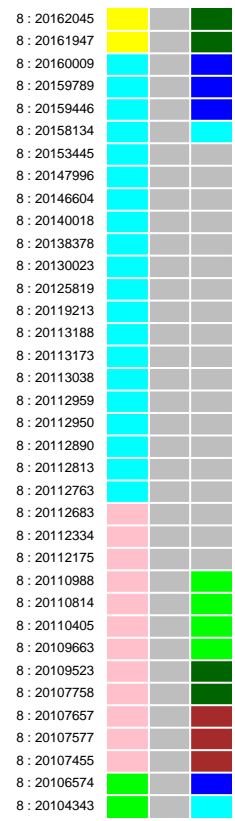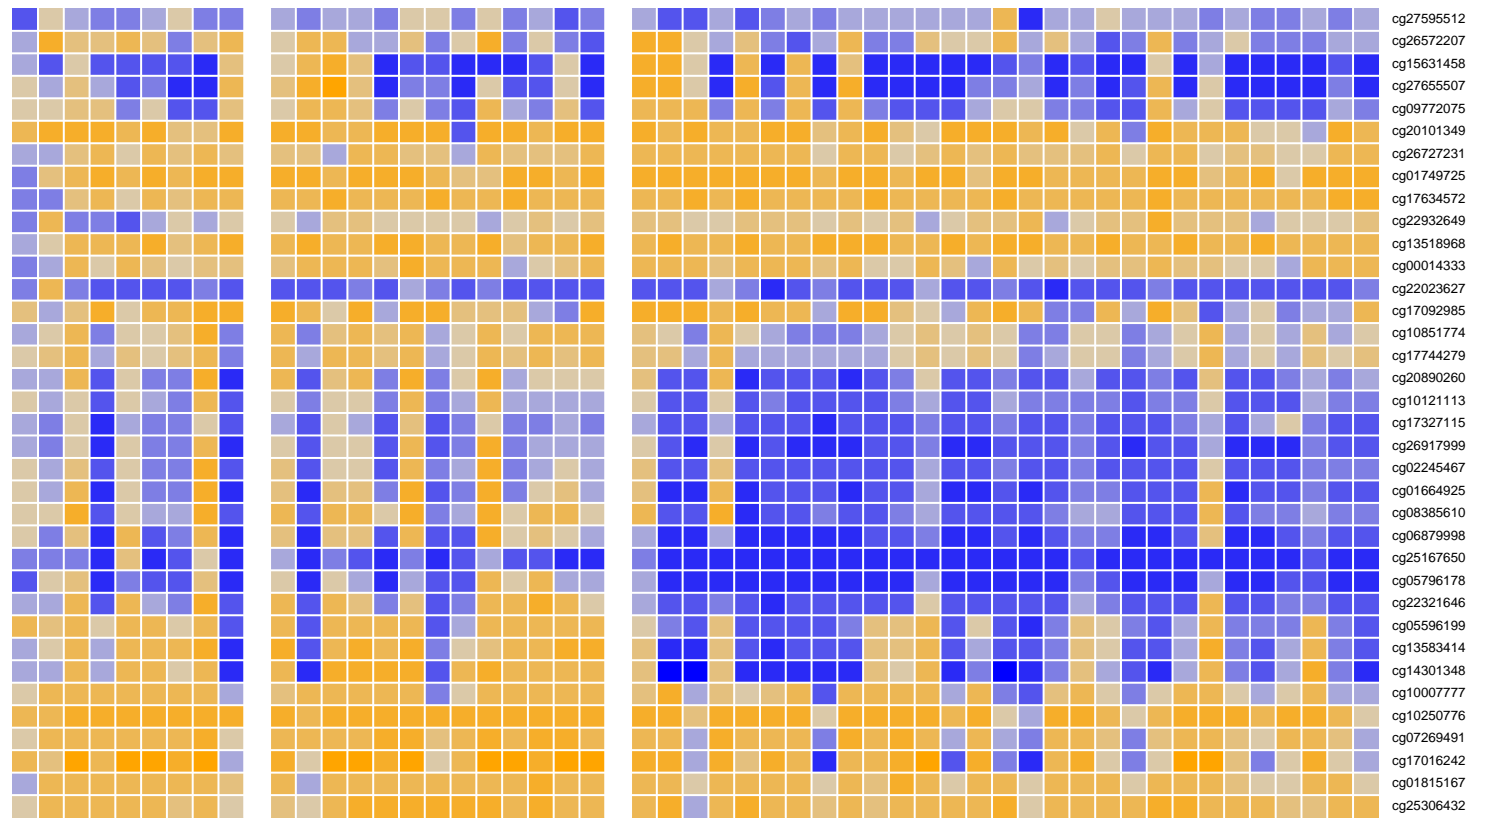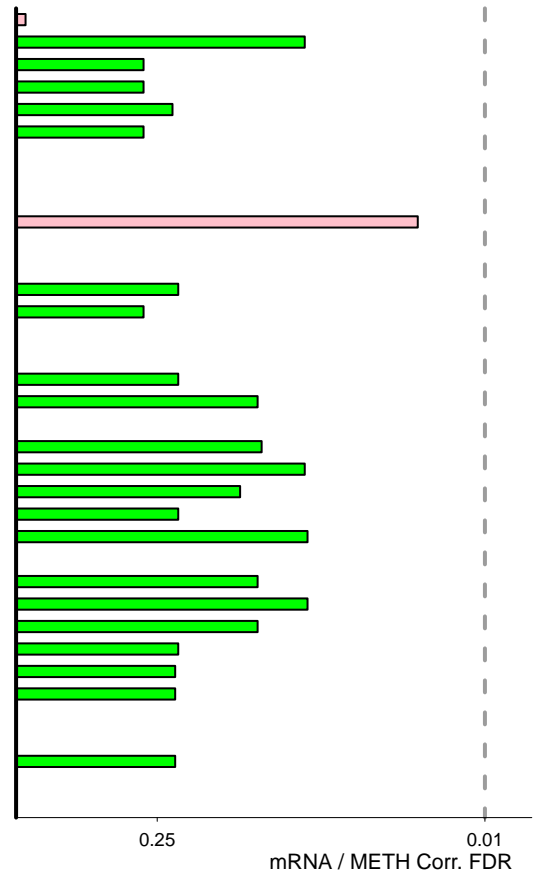

Genes  
PromoterAssoc  
CpGisland

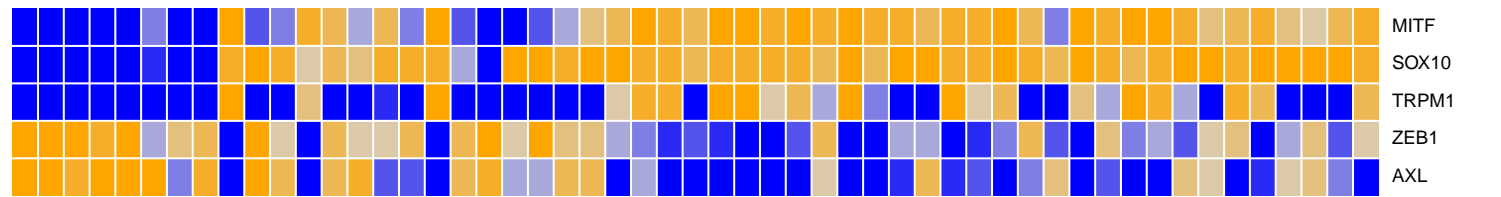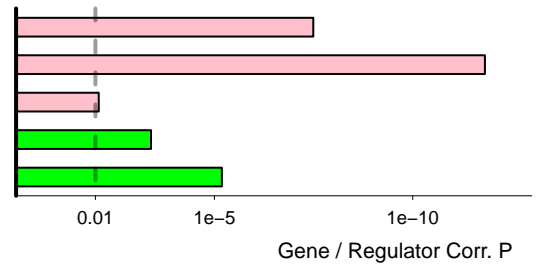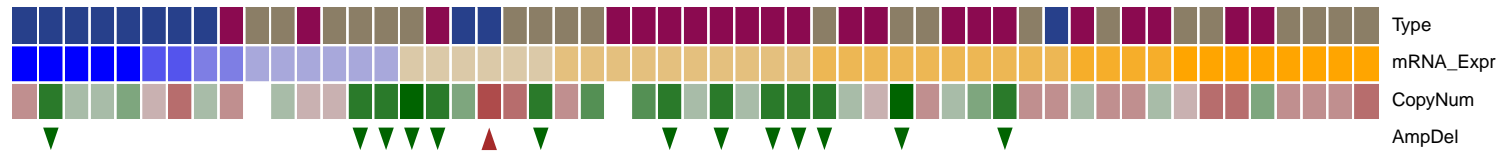

S2125  
S2770A  
S2261  
S2688  
S2356  
S2731  
S2686  
S2338  
S2374  
S2350  
S2654  
S2357  
S2423  
S2800  
S2333  
S2645  
S2391  
S2583  
S2470  
S2549  
S2495  
S2650  
S2153  
S2667  
S2320  
S2510  
S2761  
S2521  
S2408  
S2189  
S2406  
S2381  
S2400  
S2373  
S2734  
S2410  
S2330  
S2668  
S2718  
S2380  
S2405  
S2279  
S2247  
S2765  
S2216  
S2097  
S2767  
S2379  
S2508  
S2812  
S2365  
S2392  
S2596

Type  
mRNA\_Expr  
CopyNum  
AmpDel



# CEACAM1

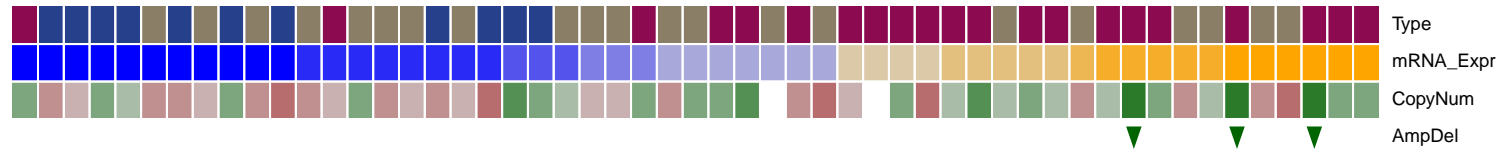

19:43033801  
 19:43033862  
 19:43032683  
 19:43032587  
 19:43012255

GeneLoc  
 PromoterAssoc  
 CpGIsland

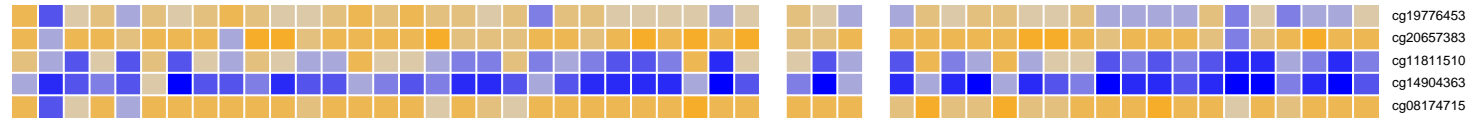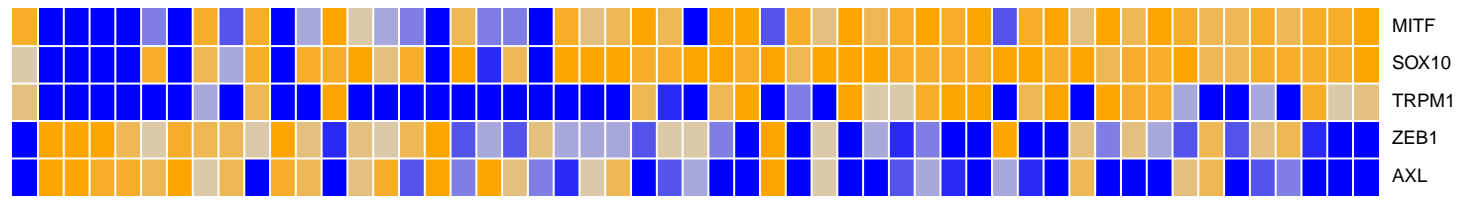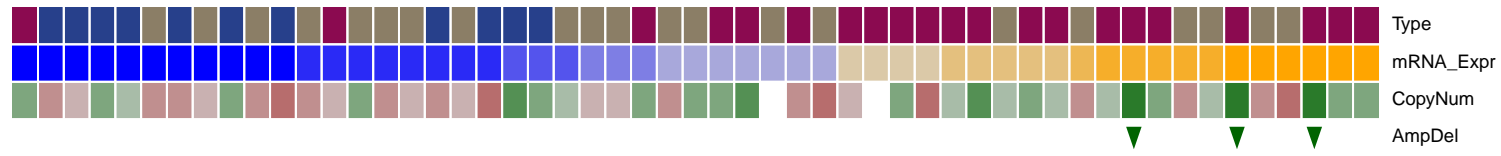

S2357  
 S2125  
 S2356  
 S2261  
 S2338  
 S2654  
 S2688  
 S2381  
 S2583  
 S2596  
 S2470  
 S2650  
 S2521  
 S2365  
 S2800  
 S2645  
 S2770A  
 S2392  
 S2731  
 S2405  
 S2686  
 S2734  
 S2812  
 S2410  
 S2406  
 S2333  
 S2549  
 S2718  
 S2391  
 S2350  
 S2373  
 S2767  
 S2400  
 S2667  
 S2668  
 S2320  
 S2330  
 S2374  
 S2495  
 S2508  
 S2408  
 S2153  
 S2765  
 S2379  
 S2216  
 S2097  
 S2423  
 S2761  
 S2247  
 S2380  
 S2510  
 S2189  
 S2279

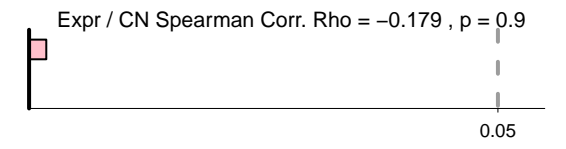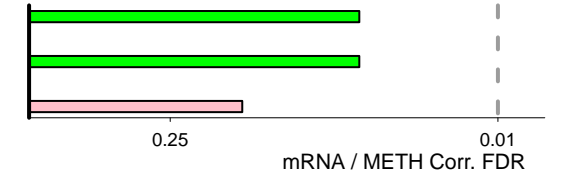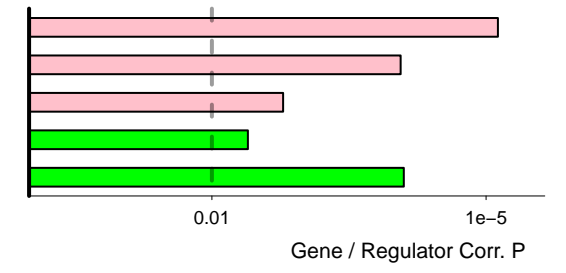

# LAMA1

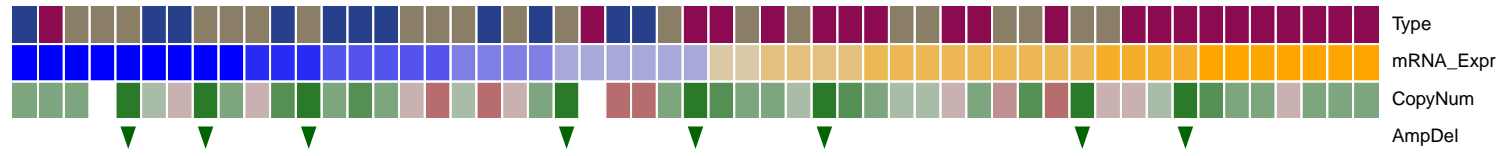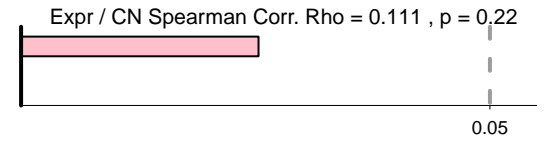

18 : 7118122  
 18 : 7118092  
 18 : 7118077  
 18 : 7117790  
 18 : 7117680  
 18 : 7117321  
 18 : 7116977  
 18 : 7116700  
 18 : 7114654  
 18 : 7038943  
 18 : 7026502  
 18 : 7013954  
 18 : 7012277  
 18 : 7011463  
 18 : 7011388  
 18 : 7011268  
 18 : 7011217

GeneLoc  
 PromoterAssoc  
 CpGIsland

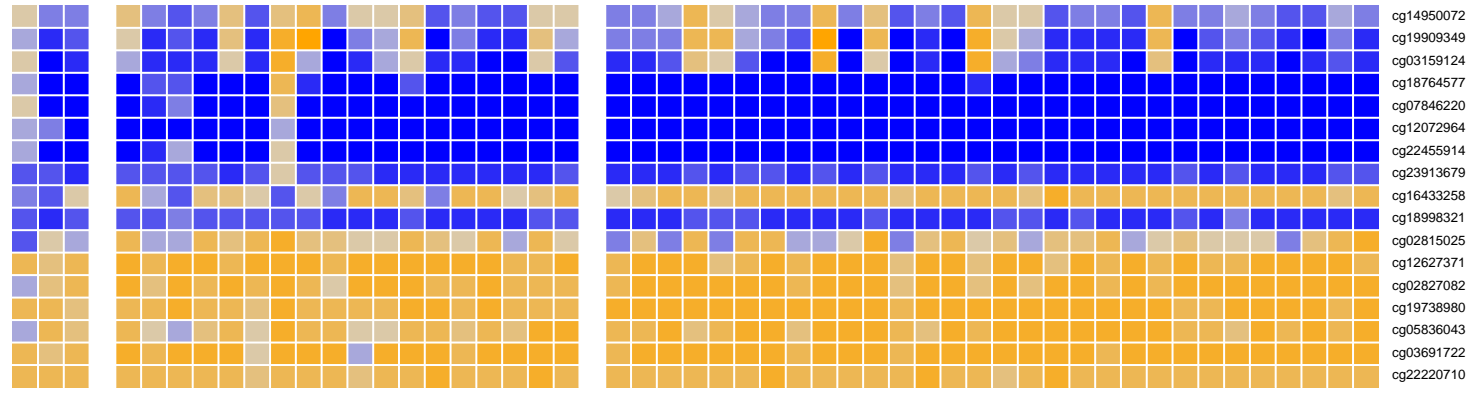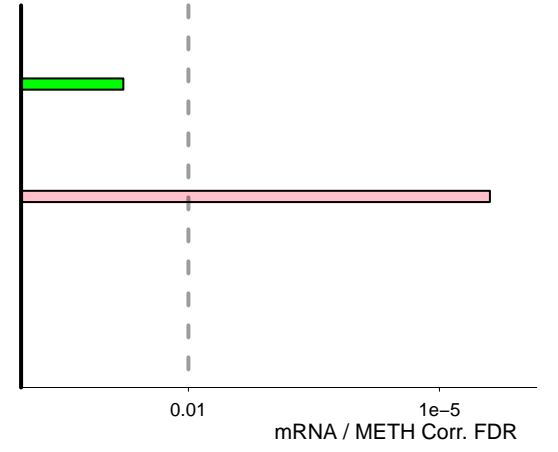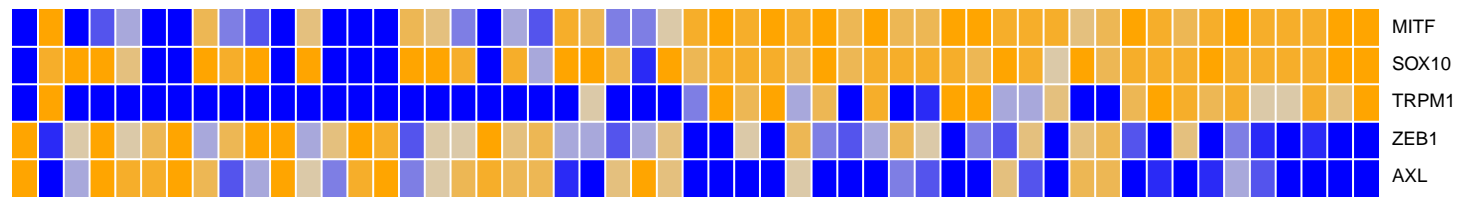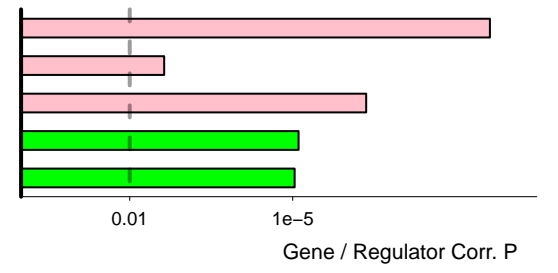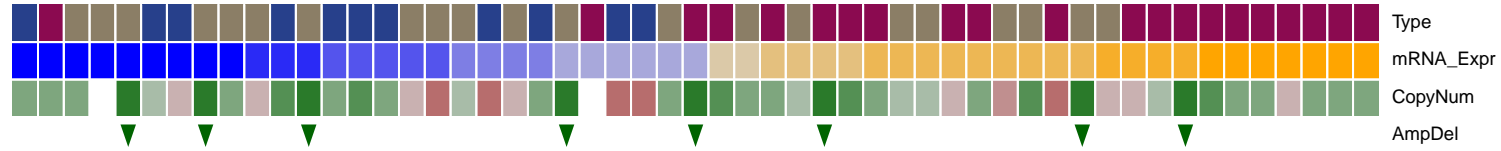

S2356  
 S2521  
 S2549  
 S2350  
 S2800  
 S2338  
 S2770A  
 S2410  
 S2645  
 S2495  
 S2125  
 S2812  
 S2686  
 S2470  
 S2688  
 S2392  
 S2767  
 S2654  
 S2261  
 S2650  
 S2583  
 S2734  
 S2667  
 S2405  
 S2731  
 S2365  
 S2373  
 S2374  
 S2596  
 S2408  
 S2381  
 S2718  
 S2761  
 S2216  
 S2380  
 S2333  
 S2391  
 S2765  
 S2097  
 S2247  
 S2357  
 S2153  
 S2423  
 S2406  
 S2330  
 S2379  
 S2508  
 S2320  
 S2668  
 S2189  
 S2510  
 S2279  
 S2400

Type  
 mRNA\_Expr  
 CopyNum  
 AmpDel
