# Supplementary material for: Multi-modal molecular programs regulate melanoma cell state
Source: PubMed Central journal article supplement (PMC9271073; doi:10.1038/s41467-022-31510-1), 2022-07-09
Supplement: 41467_2022_31510_MOESM12_ESM.pdf [file 41467_2022_31510_MOESM12_ESM.pdf]

**Supplementary Data 9: MES gene regulatory influences - MDACC cell lines.**

# EGFR

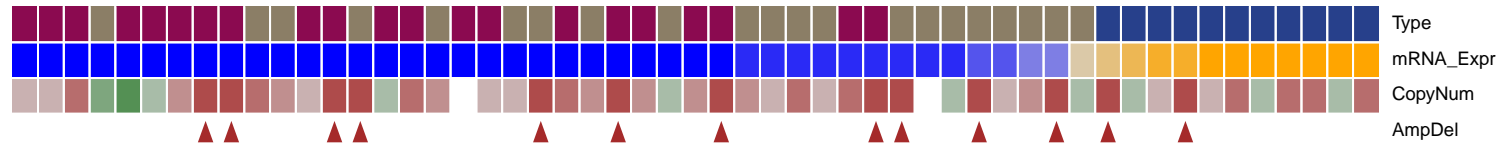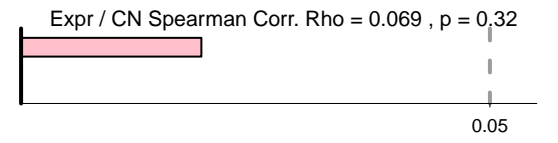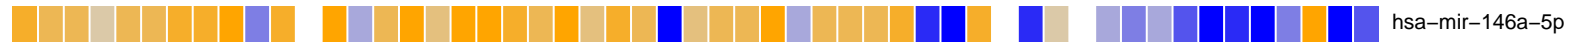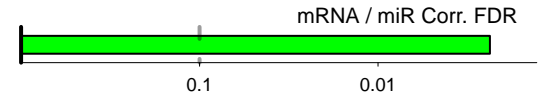

- 7 : 55086091
- 7 : 55086146
- 7 : 55086164
- 7 : 55086288
- 7 : 55086868
- 7 : 55086890
- 7 : 55087519
- 7 : 55088104
- 7 : 55089770
- 7 : 55090516
- 7 : 55090707
- 7 : 55092271
- 7 : 55098896
- 7 : 55100608
- 7 : 55106050
- 7 : 55113199
- 7 : 55119688
- 7 : 55121401
- 7 : 55128553
- 7 : 55134101
- 7 : 55139847
- 7 : 55141971
- 7 : 55145727
- 7 : 55146373
- 7 : 55147074
- 7 : 55147158
- 7 : 55147374
- 7 : 55148644
- 7 : 55152398
- 7 : 55161242
- 7 : 55167844
- 7 : 55174999
- 7 : 55177182
- 7 : 55177623
- 7 : 55179471
- 7 : 55188632
- 7 : 55197704
- 7 : 55199930
- 7 : 55209213
- 7 : 55213038
- 7 : 55223545
- 7 : 55223664
- 7 : 55224743
- 7 : 55224863
- 7 : 55224895
- 7 : 55224910
- 7 : 55225082
- 7 : 55225133
- 7 : 55225183
- 7 : 55227884
- 7 : 55238412
- 7 : 55246275
- 7 : 55248572
- 7 : 55254659
- 7 : 55257946
- 7 : 55260913
- 7 : 55267262
- 7 : 55280797
- 7 : 55281230
- 7 : 55304314
- 7 : 55313376
- 7 : 55318410
- 7 : 55322087
- 7 : 55322307
- 7 : 55322933

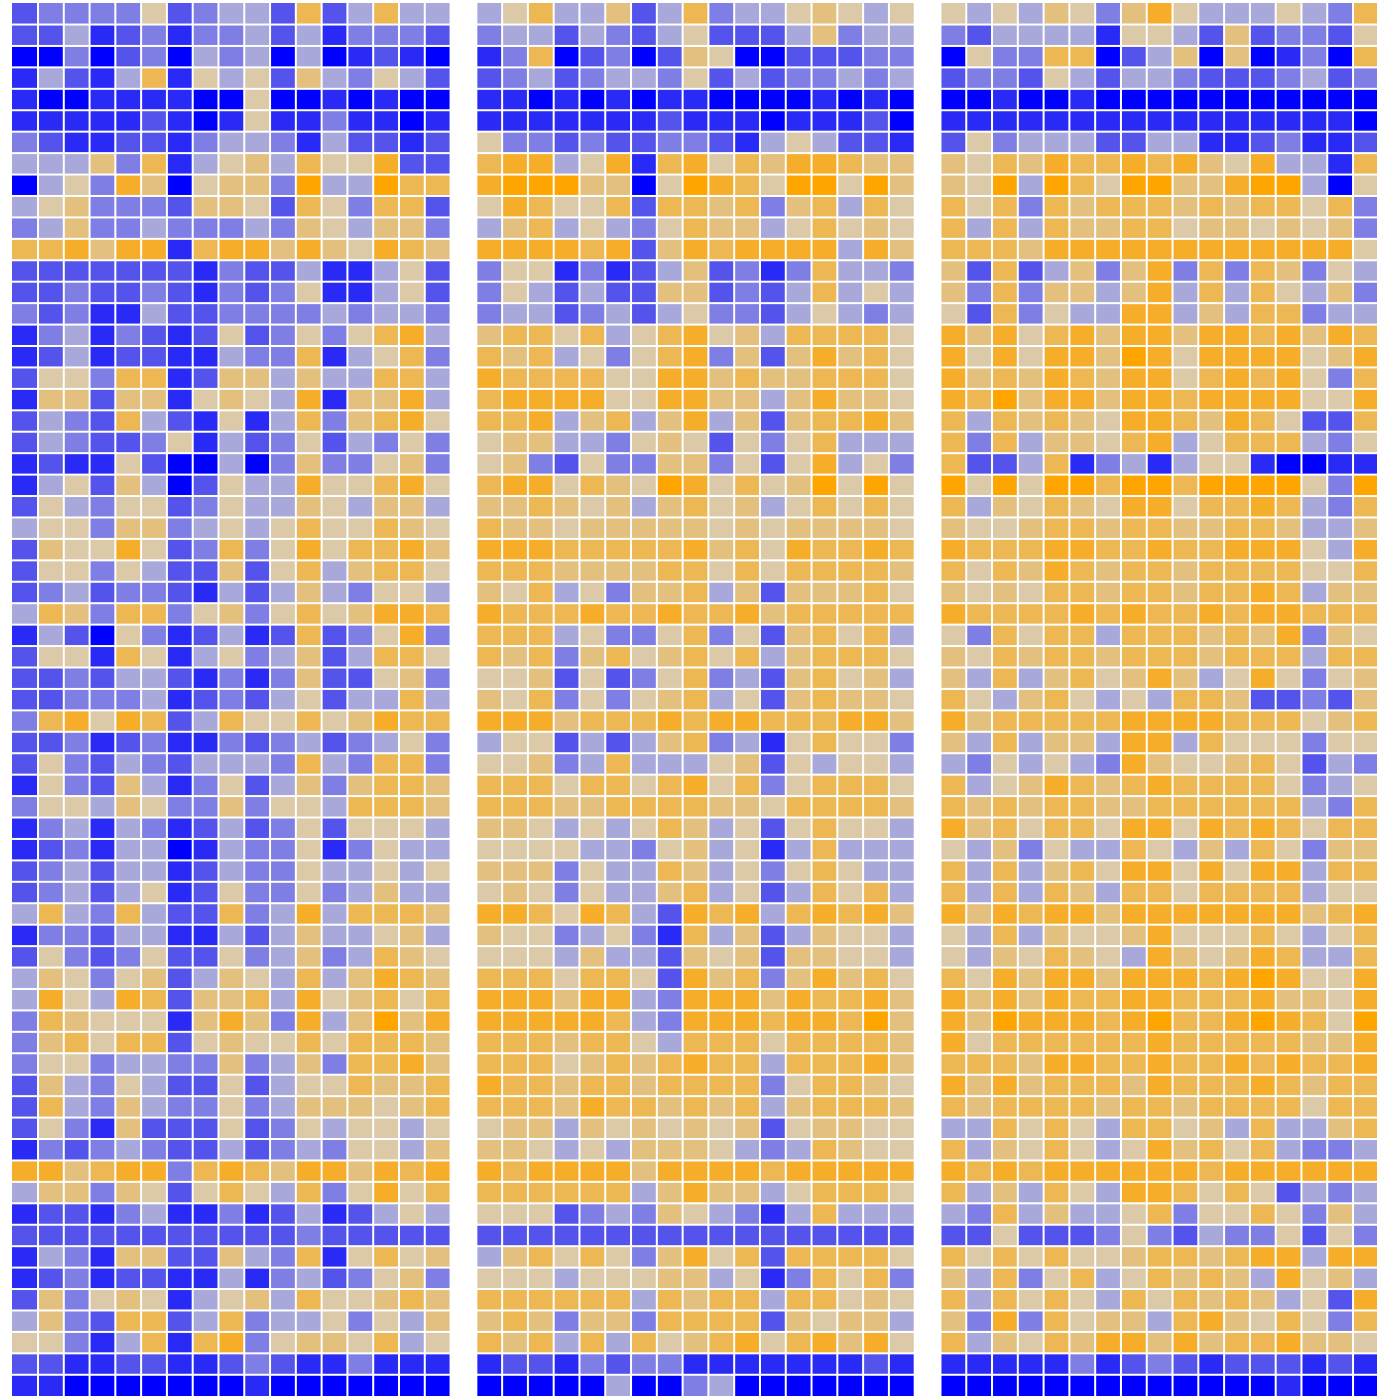

- cg16751451
- cg22396409
- cg07311521
- cg03860890
- cg05064645
- cg14094960
- cg25311271
- cg11849717
- cg10002850
- cg26055062
- cg10078057
- cg23757825
- cg22427313
- cg06052090
- cg03046247
- cg10690277
- cg00511107
- cg17319788
- cg22939005
- cg20773588
- cg21901928
- cg04625338
- cg27598340
- cg20041612
- cg14688342
- cg10550611
- cg13598111
- cg27637738
- cg14344486
- cg09378783
- cg05207583
- cg05537387
- cg01461514
- cg18809076
- cg02166842
- cg26277197
- cg04156940
- cg25815893
- cg18452131
- cg16488565
- cg02003682
- cg04116217
- cg05530630
- cg05898452
- cg18071865
- cg02316066
- cg16589260
- cg21808635
- cg20706768
- cg17389149
- cg08428266
- cg05246100
- cg20062492
- cg26213224
- cg15692229
- cg21681212
- cg24723373
- cg15261730
- cg10154108
- cg18461584
- cg00912277
- cg16956218
- cg19083626
- cg01965822
- cg13285893

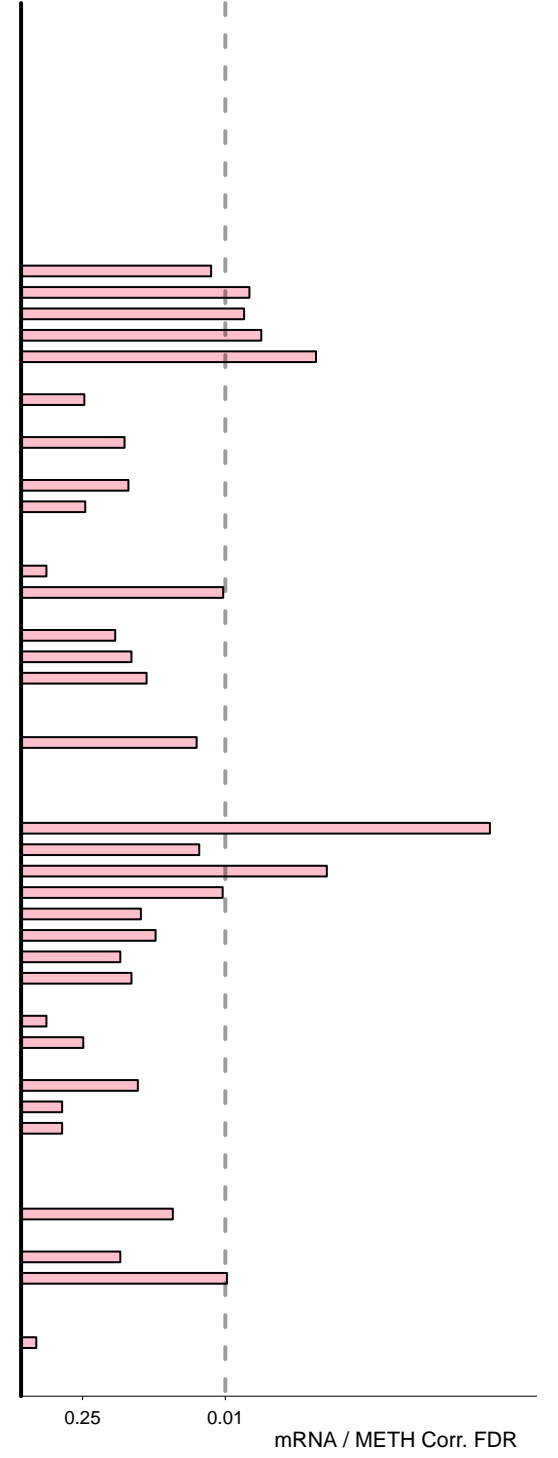

GeneLoc  
PromoterAssoc  
CpGIsland

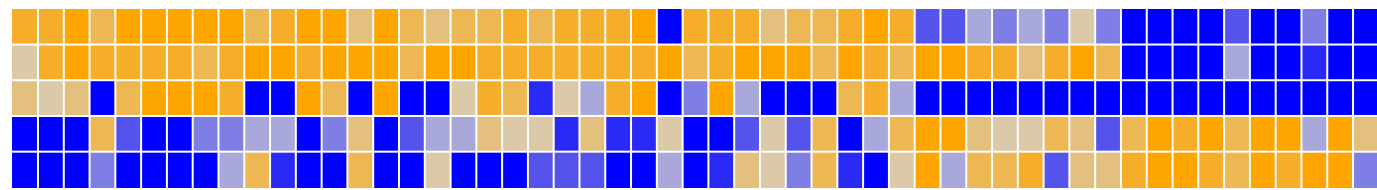

- MITF
- SOX10
- TRPM1
- ZEB1
- AXL

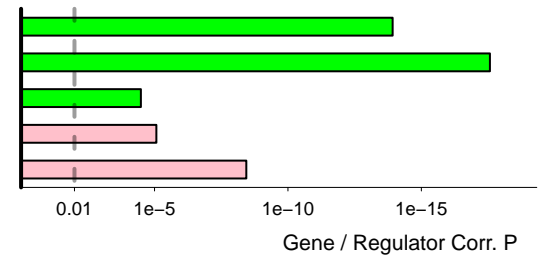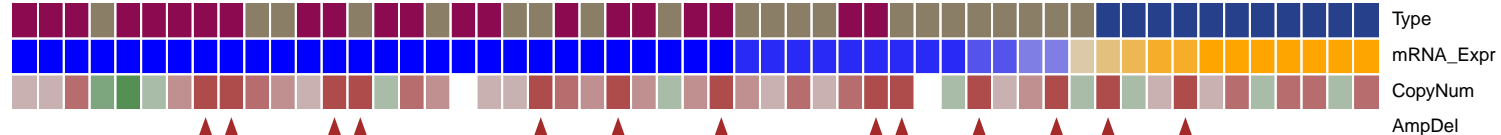

- S2357
- S2189
- S2279
- S2380
- S2406
- S2408
- S2374
- S2765
- S2320
- S2410
- S2734
- S2391
- S2718
- S2153
- S2400
- S2761
- S2812
- S2667
- S2379
- S2596
- S2333
- S2668
- S2247
- S2510
- S2521
- S2549
- S2373
- S2330
- S2097
- S2767
- S2392
- S2423
- S2508
- S2216
- S2381
- S2350
- S2495
- S2650
- S2654
- S2800
- S2645
- S2365
- S2405
- S2338
- S2770A
- S2688
- S2261
- S2583
- S2356
- S2470
- S2731
- S2125
- S2686

# TSPAN5

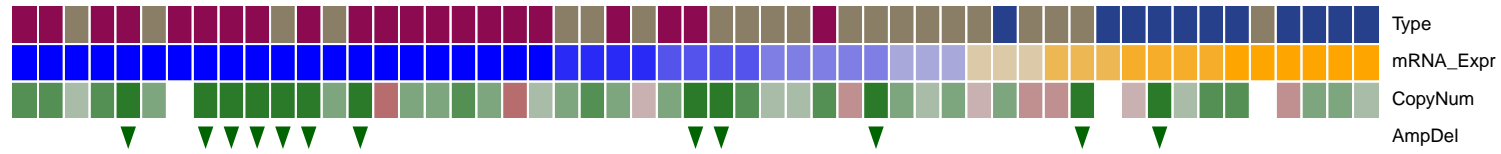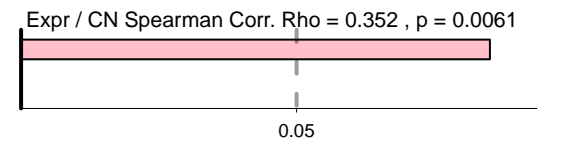

4 : 99580849  
 4 : 99580530  
 4 : 99580449  
 4 : 99580121  
 4 : 99579248  
 4 : 99578720  
 4 : 99577266  
 4 : 99576808  
 4 : 99562017  
 4 : 99559622  
 4 : 99552952  
 4 : 99538493  
 4 : 99534176  
 4 : 99531141  
 4 : 99529282  
 4 : 99504122  
 4 : 99502614  
 4 : 99501119  
 4 : 99487497  
 4 : 99480257  
 4 : 99479630  
 4 : 99477634  
 4 : 99467377  
 4 : 99459756  
 4 : 99458402  
 4 : 99458347  
 4 : 99450728  
 4 : 99449246  
 4 : 99445460  
 4 : 99430524  
 4 : 99427937  
 4 : 99418921  
 4 : 99410748  
 4 : 99407996  
 4 : 99404186  
 4 : 99402843  
 4 : 99393613

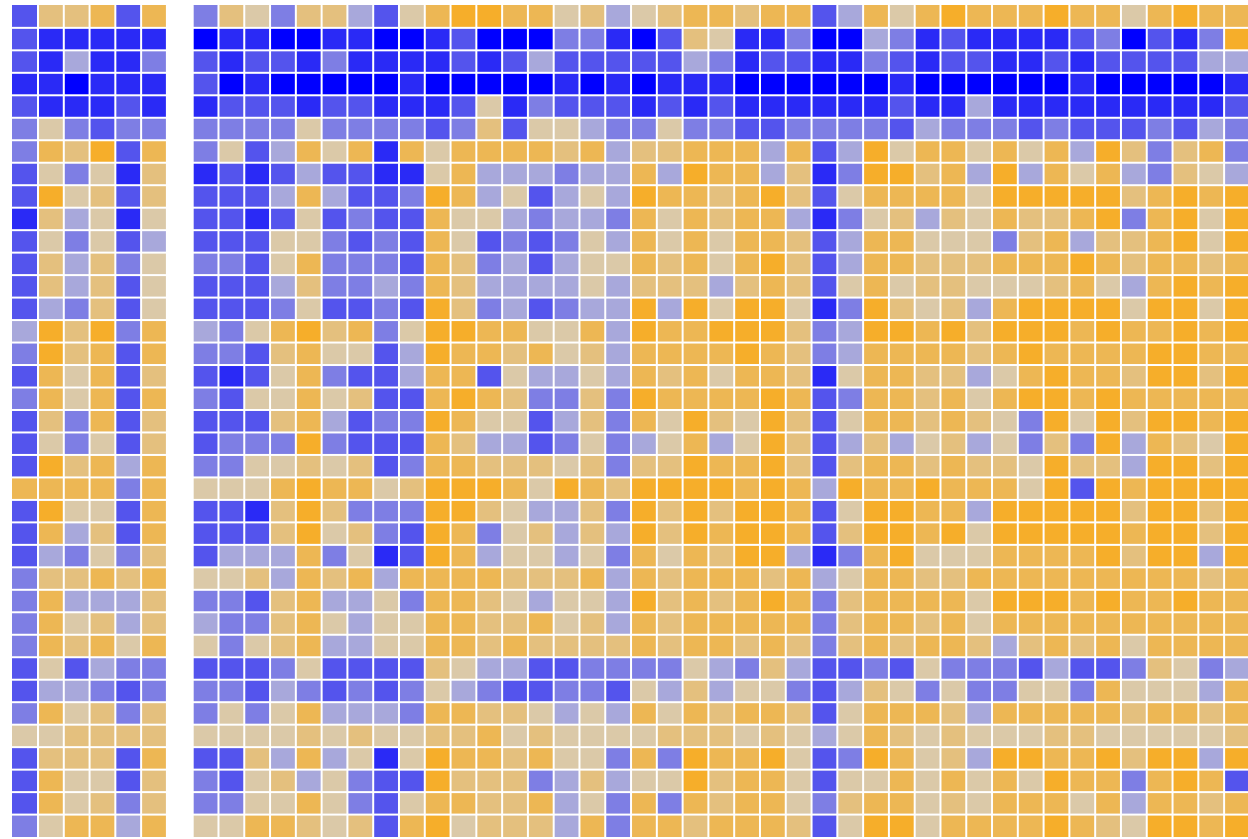

cg00615469  
 cg08979352  
 cg18823647  
 cg22559669  
 cg00622677  
 cg16692732  
 cg00417071  
 cg10493055  
 cg04702572  
 cg00398880  
 cg23246886  
 cg09496130  
 cg25841008  
 cg14414891  
 cg23305440  
 cg22031466  
 cg11693424  
 cg00320354  
 cg04854098  
 cg21467697  
 cg20616060  
 cg01300887  
 cg24968742  
 cg03206668  
 cg19444390  
 cg25217895  
 cg02015219  
 cg25081128  
 cg08915024  
 cg09296942  
 cg03298704  
 cg11193169  
 cg18544030  
 cg01881442  
 cg03234557  
 cg22404125  
 cg18054327

GeneLoc  
 PromoterAssoc  
 CpGIsland

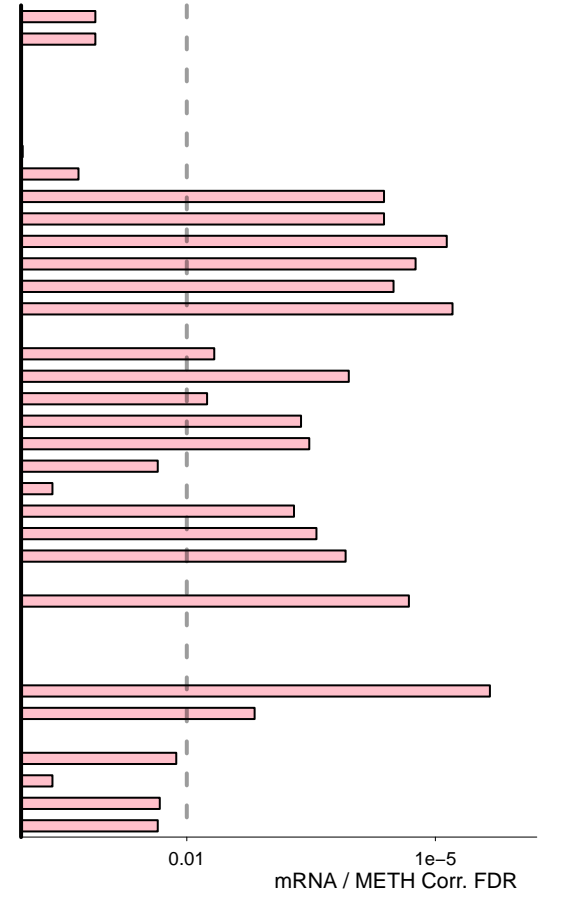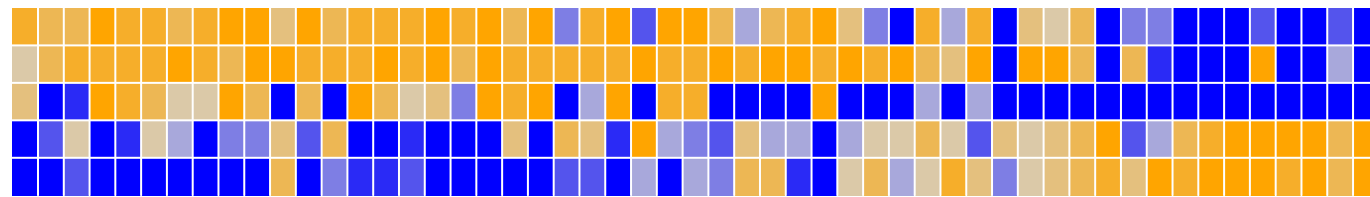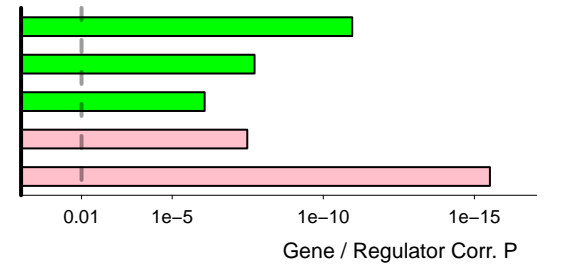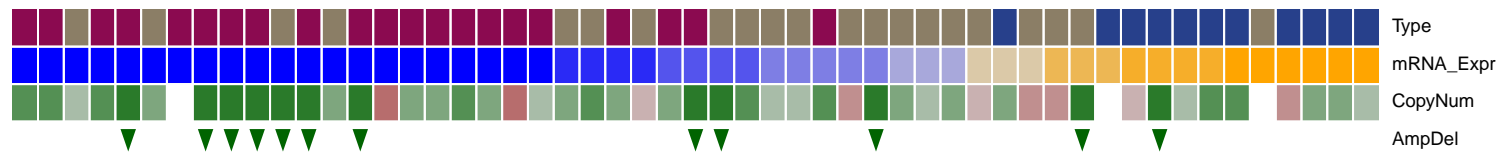

S2357  
 S2761  
 S2333  
 S2391  
 S2510  
 S2596  
 S2667  
 S2189  
 S2765  
 S2718  
 S2153  
 S2406  
 S2380  
 S2330  
 S2508  
 S2668  
 S2279  
 S2373  
 S2400  
 S2379  
 S2408  
 S2645  
 S2247  
 S2521  
 S2495  
 S2216  
 S2320  
 S2392  
 S2650  
 S2410  
 S2734  
 S2374  
 S2812  
 S2654  
 S2549  
 S2381  
 S2800  
 S2097  
 S2686  
 S2767  
 S2365  
 S2423  
 S2470  
 S2405  
 S2731  
 S2338  
 S2688  
 S2770A  
 S2350  
 S2261  
 S2356  
 S2583  
 S2125

# NRP1

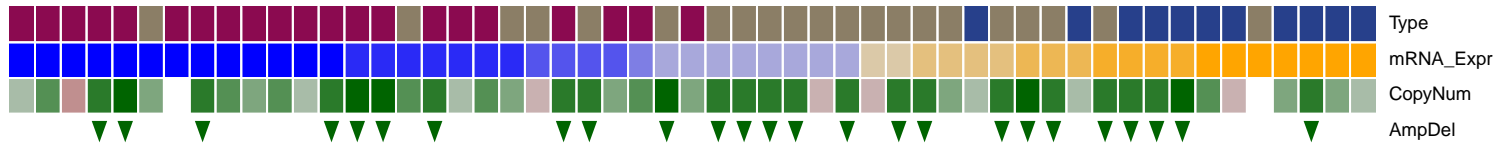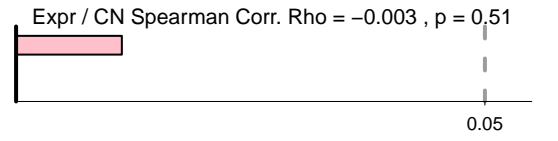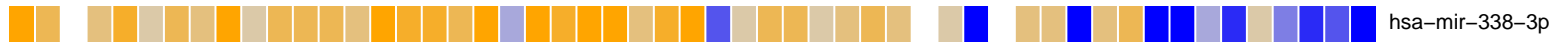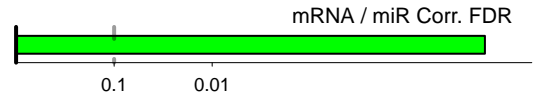

10 : 33626522  
 10 : 33626196  
 10 : 33625992  
 10 : 33625494  
 10 : 33624868  
 10 : 33624433  
 10 : 33623121  
 10 : 33622332  
 10 : 33612892  
 10 : 33608914  
 10 : 33608887  
 10 : 33604657  
 10 : 33594454  
 10 : 33592746  
 10 : 33590732  
 10 : 33568029  
 10 : 33562205  
 10 : 33553435  
 10 : 33527263  
 10 : 33524393  
 10 : 33518295  
 10 : 33515115  
 10 : 33512002  
 10 : 33485389  
 10 : 33483109  
 10 : 33468337

GeneLoc  
 PromoterAssoc  
 CpGIsland

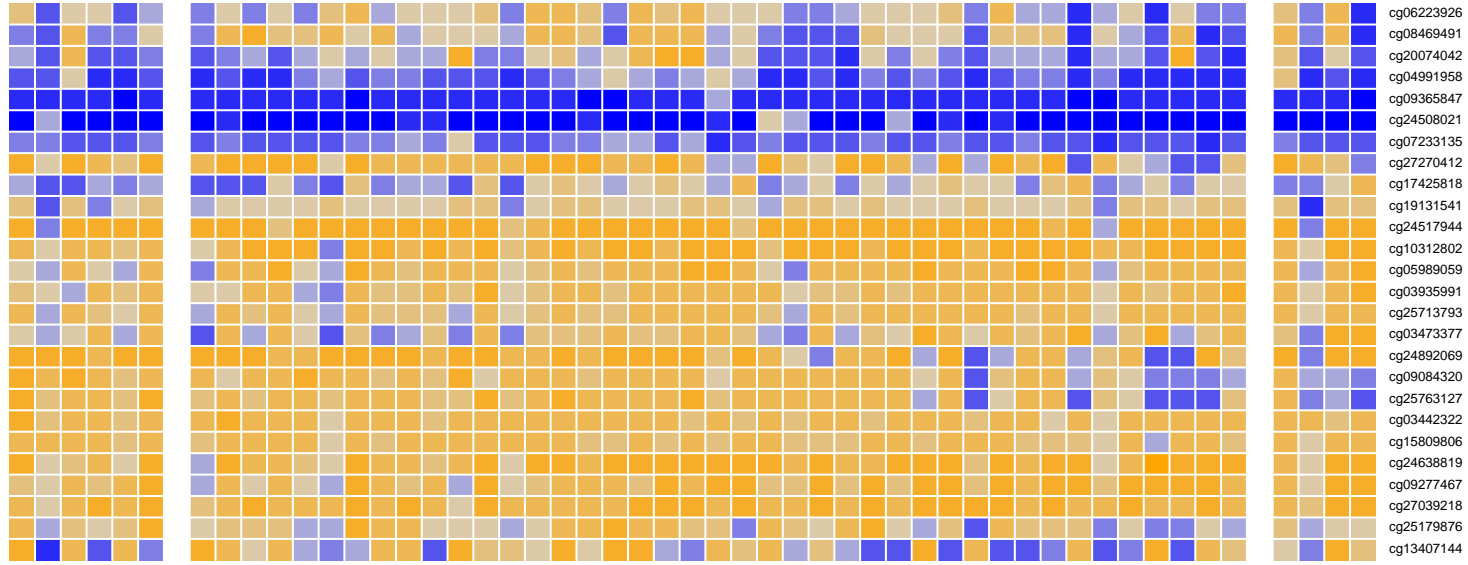

cg06223926  
 cg08469491  
 cg20074042  
 cg04991958  
 cg09365847  
 cg24508021  
 cg07233135  
 cg27270412  
 cg17425818  
 cg19131541  
 cg24517944  
 cg10312802  
 cg05890599  
 cg03935991  
 cg25713793  
 cg03473377  
 cg24892069  
 cg09084320  
 cg25763127  
 cg03442322  
 cg15809806  
 cg24638819  
 cg09277467  
 cg27039218  
 cg25179876  
 cg13407144

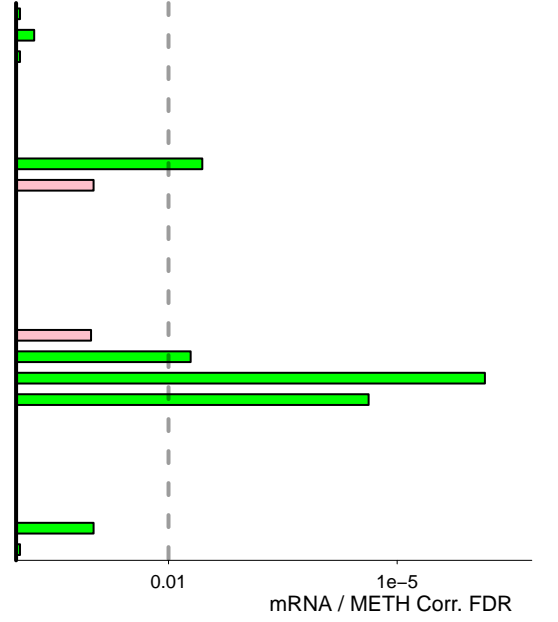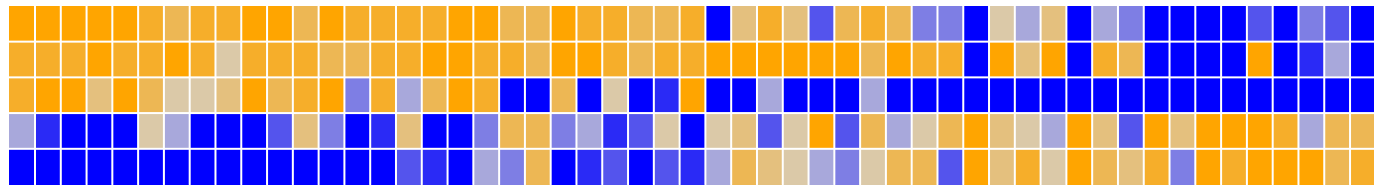

MITF  
 SOX10  
 TRPM1  
 ZEB1  
 AXL

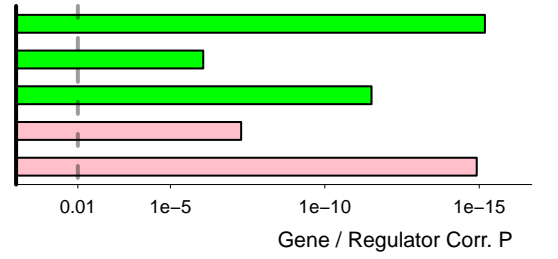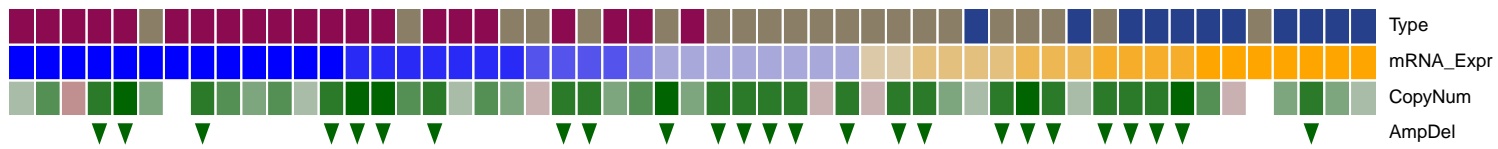

S2216  
 S2521  
 S2391  
 S2279  
 S2374  
 S2596  
 S2667  
 S2189  
 S2357  
 S2408  
 S2406  
 S2379  
 S2765  
 S2373  
 S2510  
 S2247  
 S2508  
 S2400  
 S2320  
 S2380  
 S2423  
 S2718  
 S2734  
 S2668  
 S2761  
 S2333  
 S2330  
 S2549  
 S2153  
 S2097  
 S2767  
 S2495  
 S2392  
 S2381  
 S2410  
 S2654  
 S2645  
 S2125  
 S2365  
 S2800  
 S2812  
 S2356  
 S2650  
 S2405  
 S2470  
 S2686  
 S2770A  
 S2261  
 S2350  
 S2688  
 S2731  
 S2583  
 S2338

Type  
 mRNA\_Expr  
 CopyNum  
 AmpDel

# BASP1

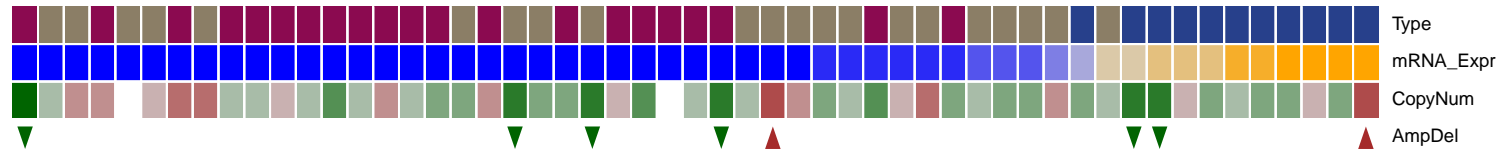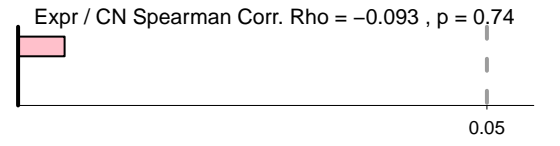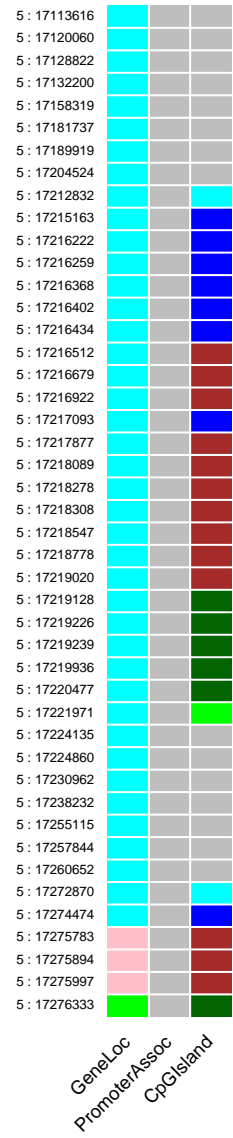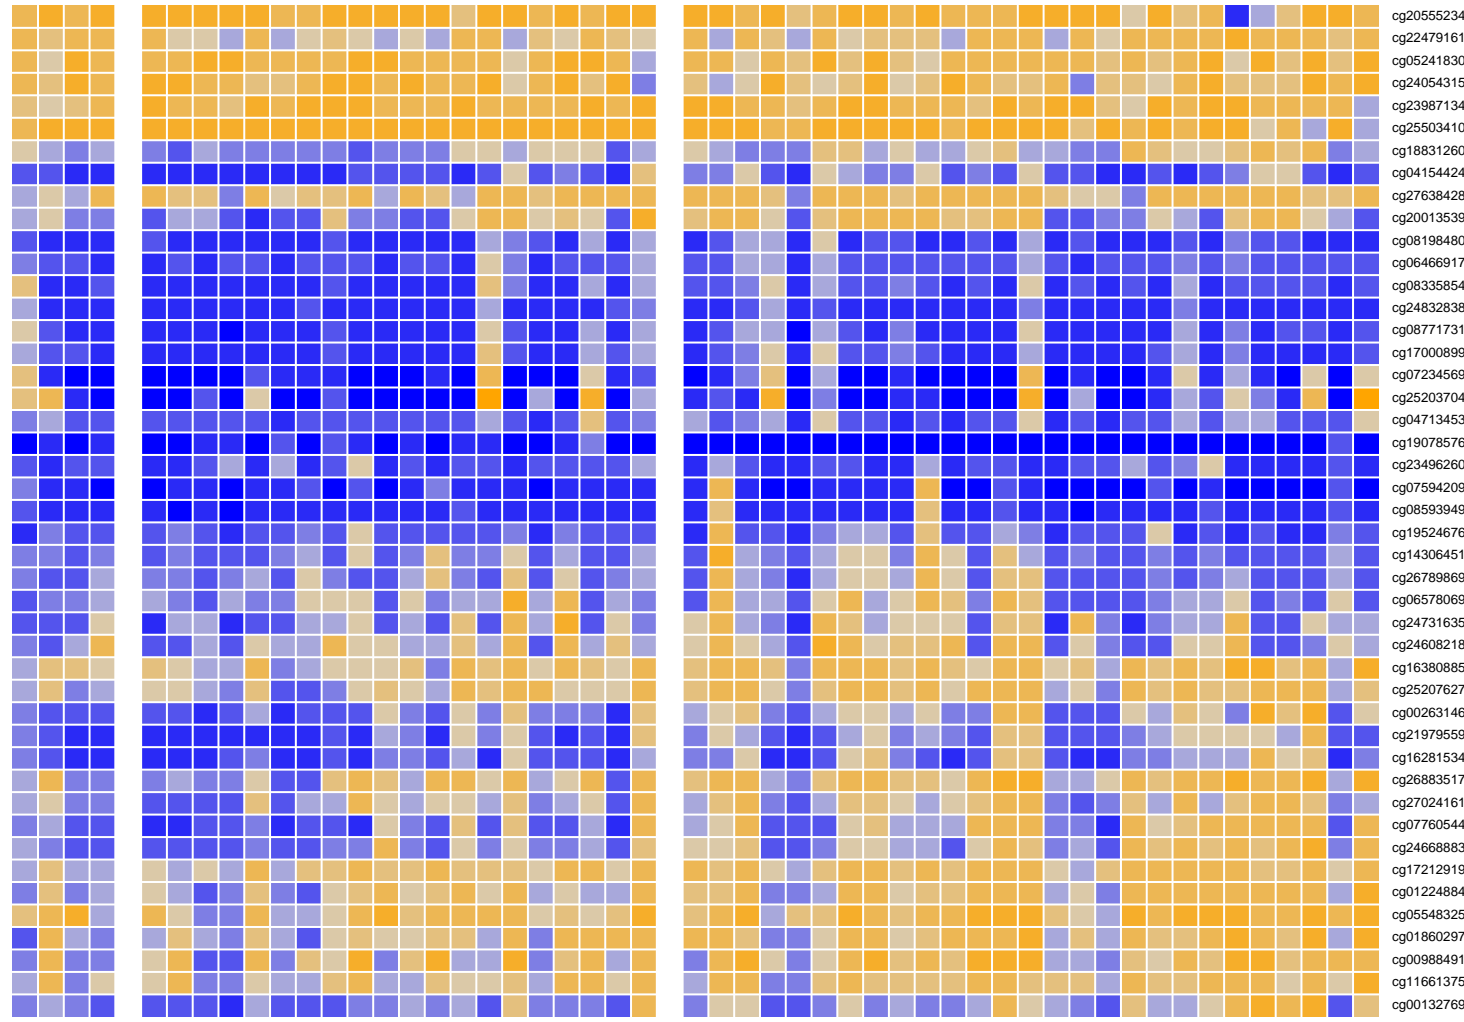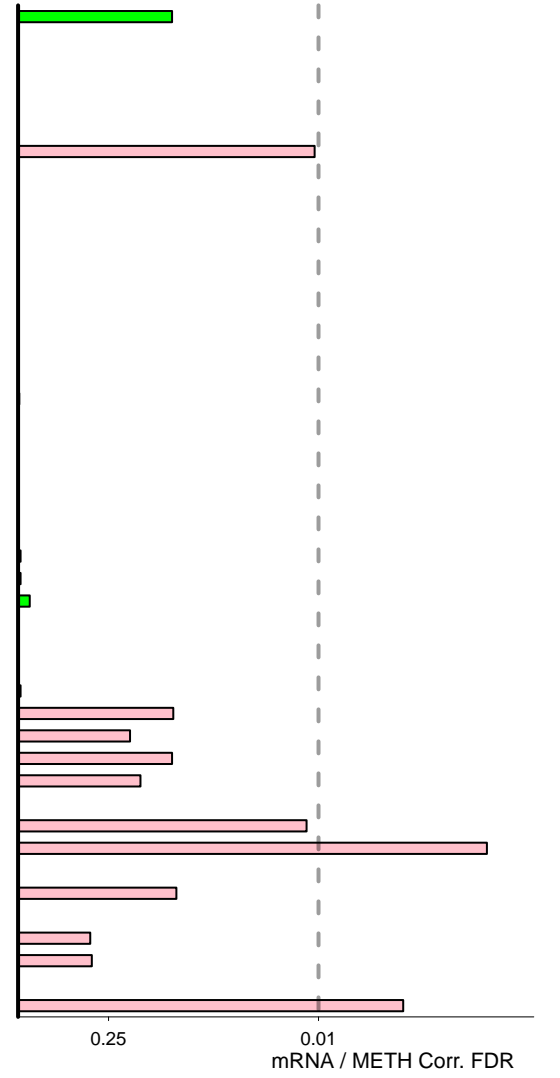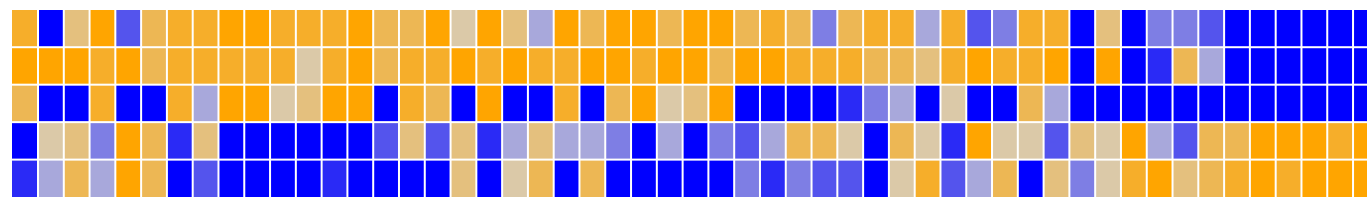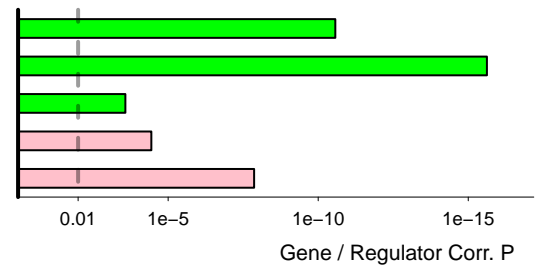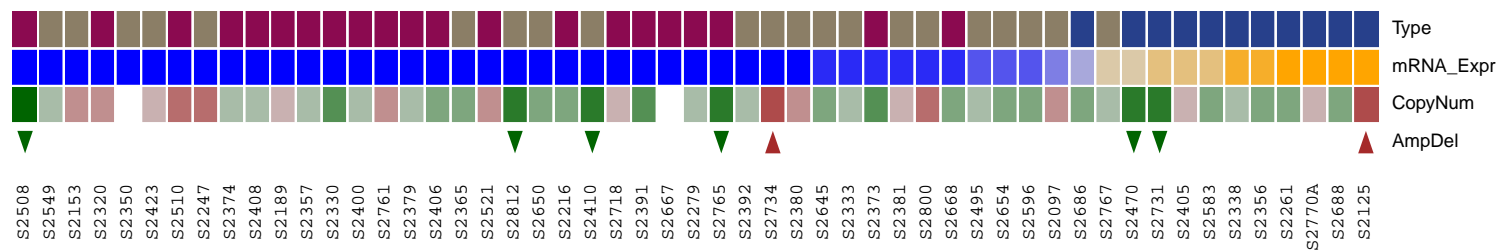

# TMEM200A

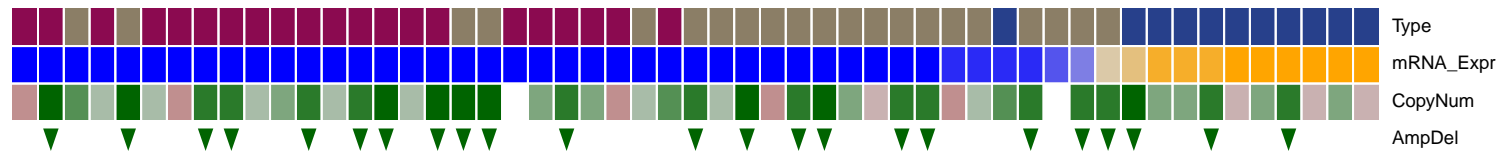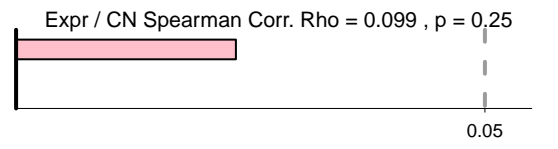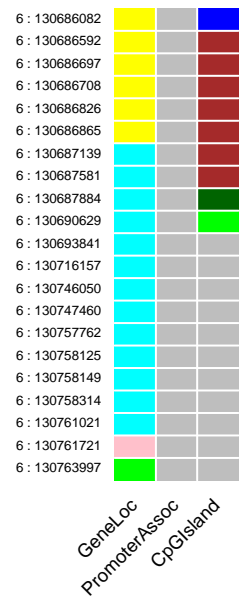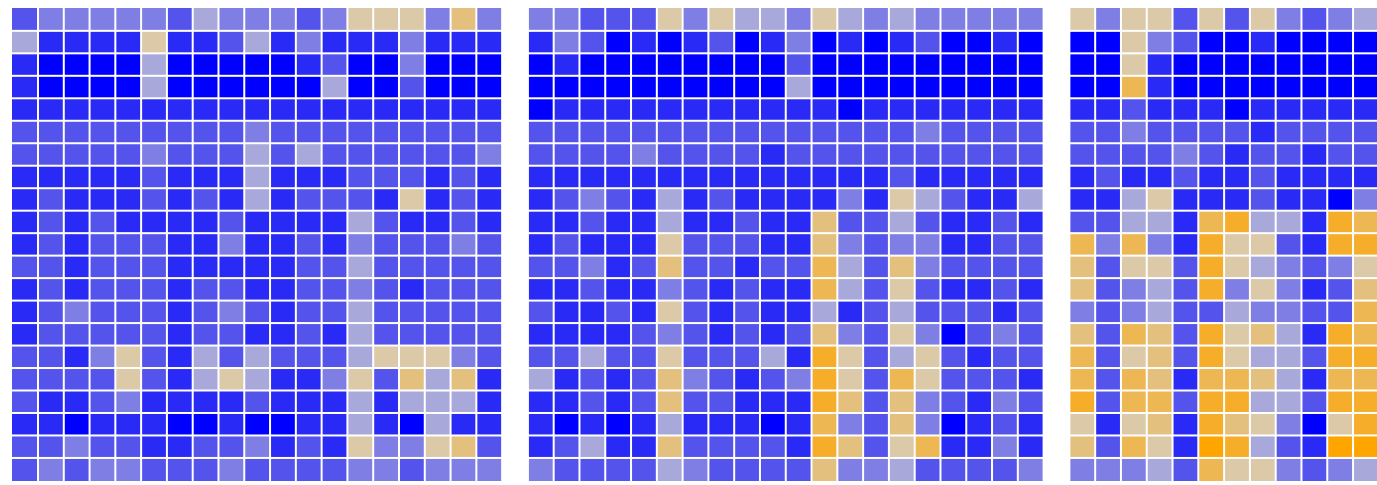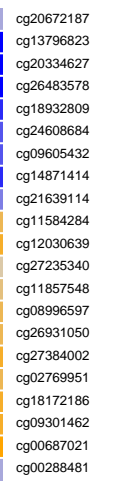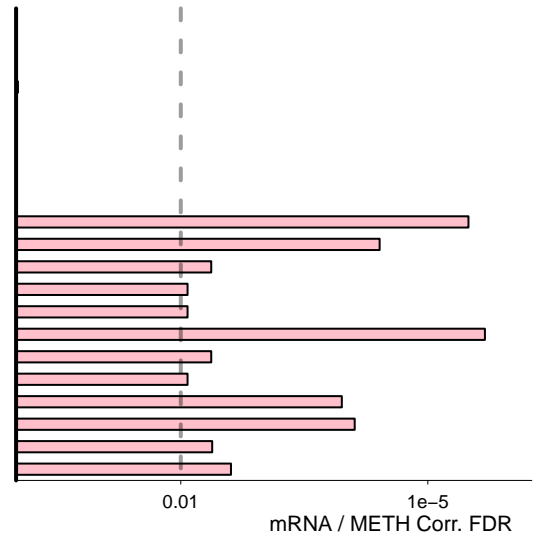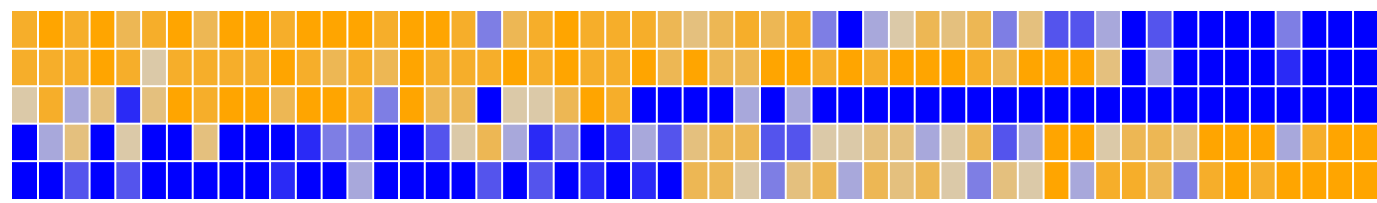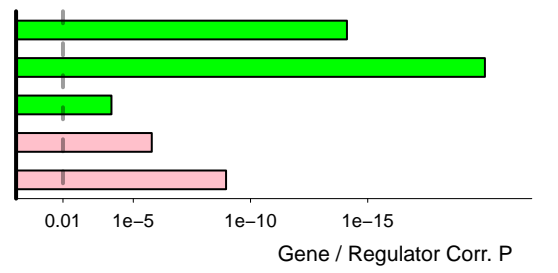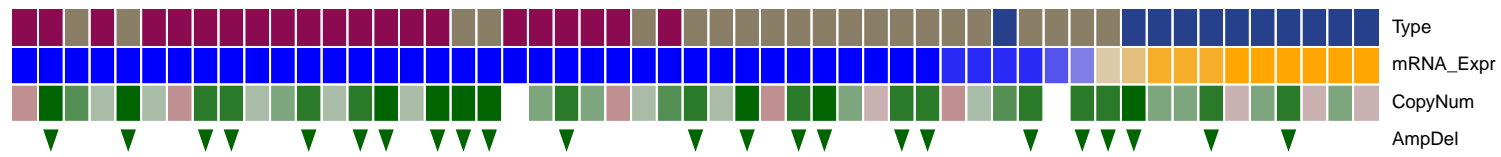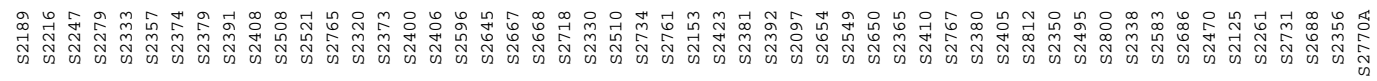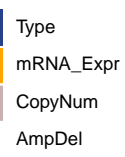

# LOXL2

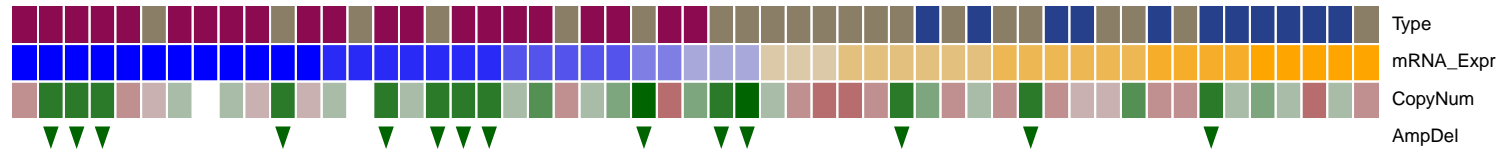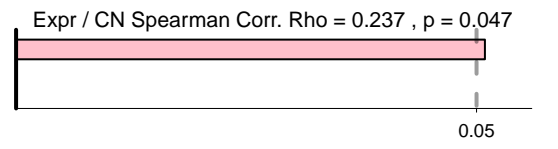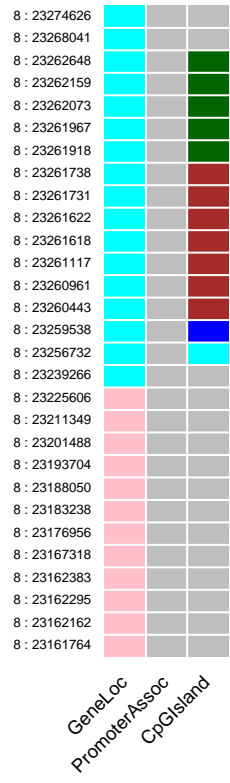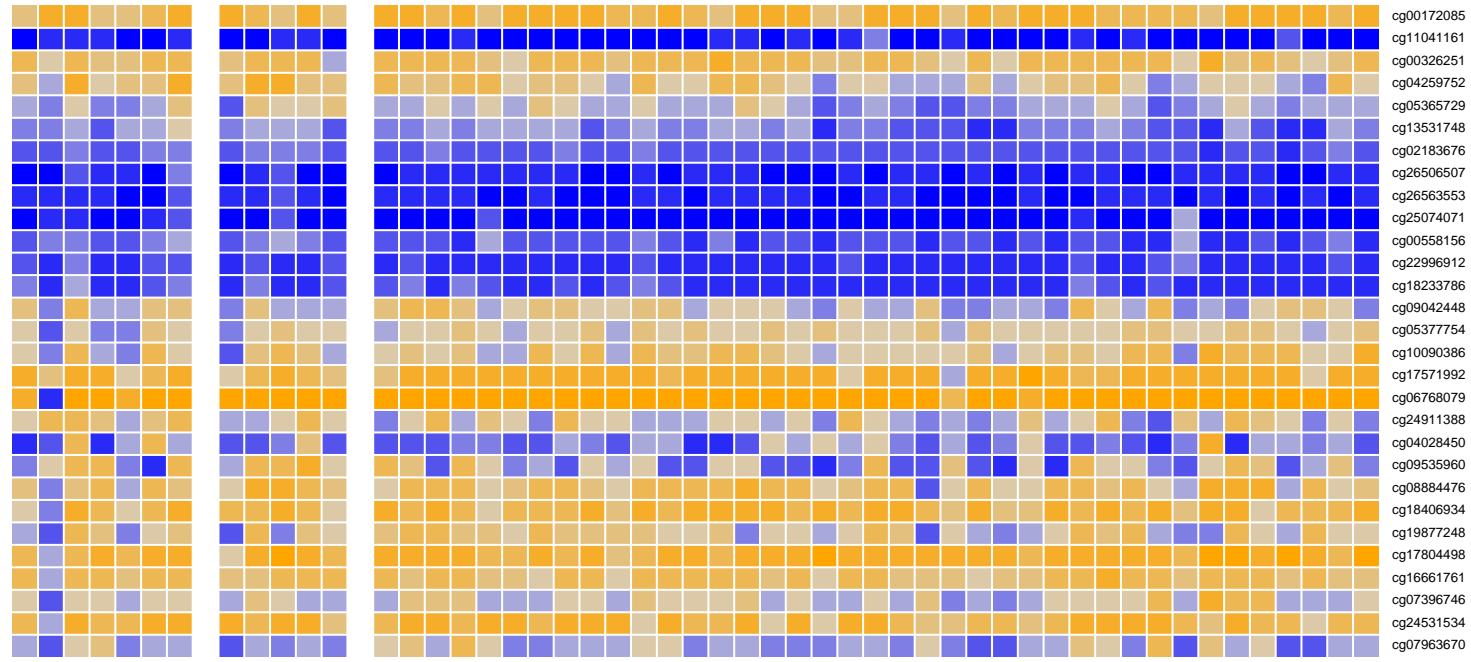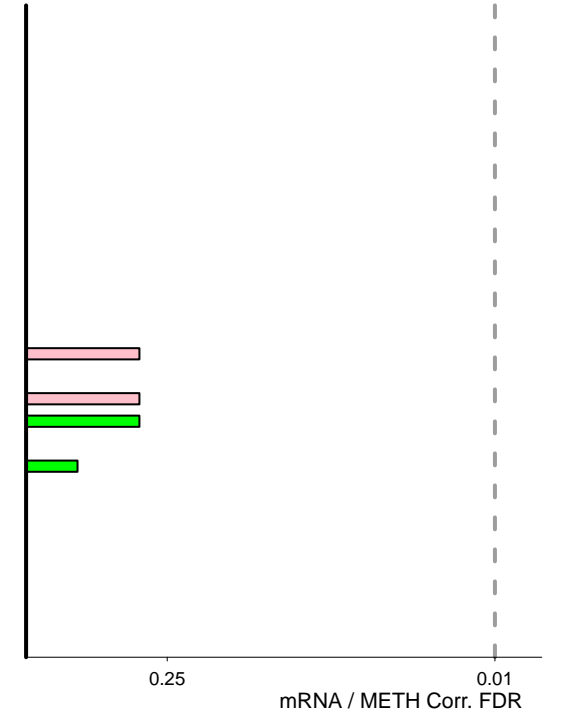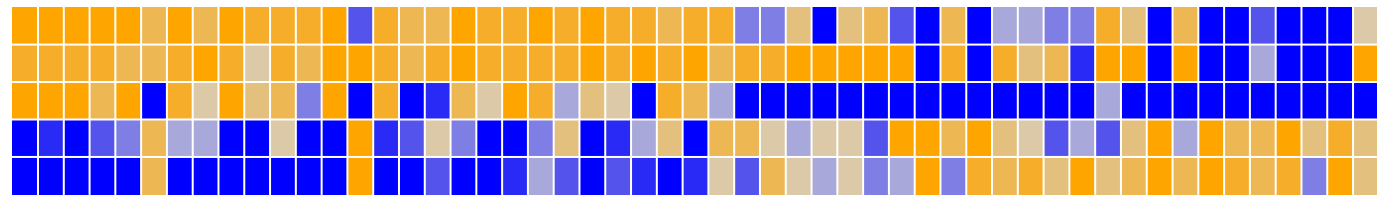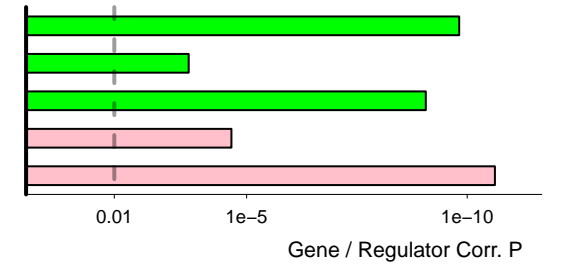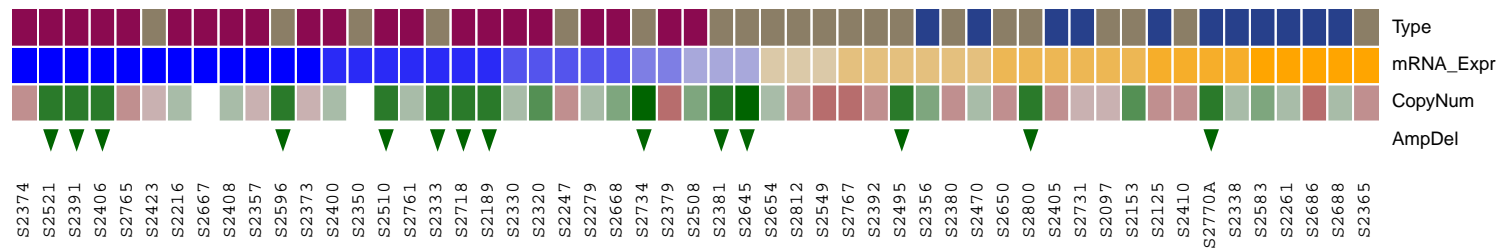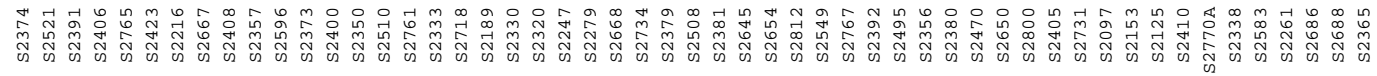

# CRIM1

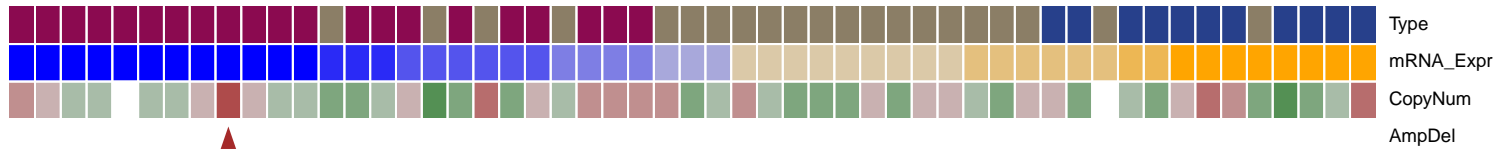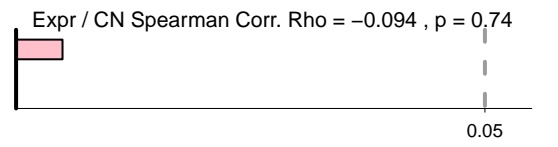

2 : 36582038  
 2 : 36582144  
 2 : 36582293  
 2 : 36582398  
 2 : 36582467  
 2 : 36583117  
 2 : 36584021  
 2 : 36584594  
 2 : 36584699  
 2 : 36584981  
 2 : 36586710  
 2 : 36588933  
 2 : 36589883  
 2 : 36595352  
 2 : 36598278  
 2 : 36601890  
 2 : 36603543  
 2 : 36605829  
 2 : 36607424  
 2 : 36610980  
 2 : 36614588  
 2 : 36616441  
 2 : 36623116  
 2 : 36626126  
 2 : 36629950  
 2 : 36635519  
 2 : 36638660  
 2 : 36642125  
 2 : 36647539  
 2 : 36648738  
 2 : 36655025  
 2 : 36656950  
 2 : 36667594  
 2 : 36668864  
 2 : 36677570  
 2 : 36682726  
 2 : 36688564  
 2 : 36689815  
 2 : 36696193  
 2 : 36706722  
 2 : 36706779  
 2 : 36712570  
 2 : 36716635  
 2 : 36718460  
 2 : 36721423  
 2 : 36725928  
 2 : 36735641  
 2 : 36753857  
 2 : 36757828  
 2 : 36758130  
 2 : 36765605  
 2 : 36776323

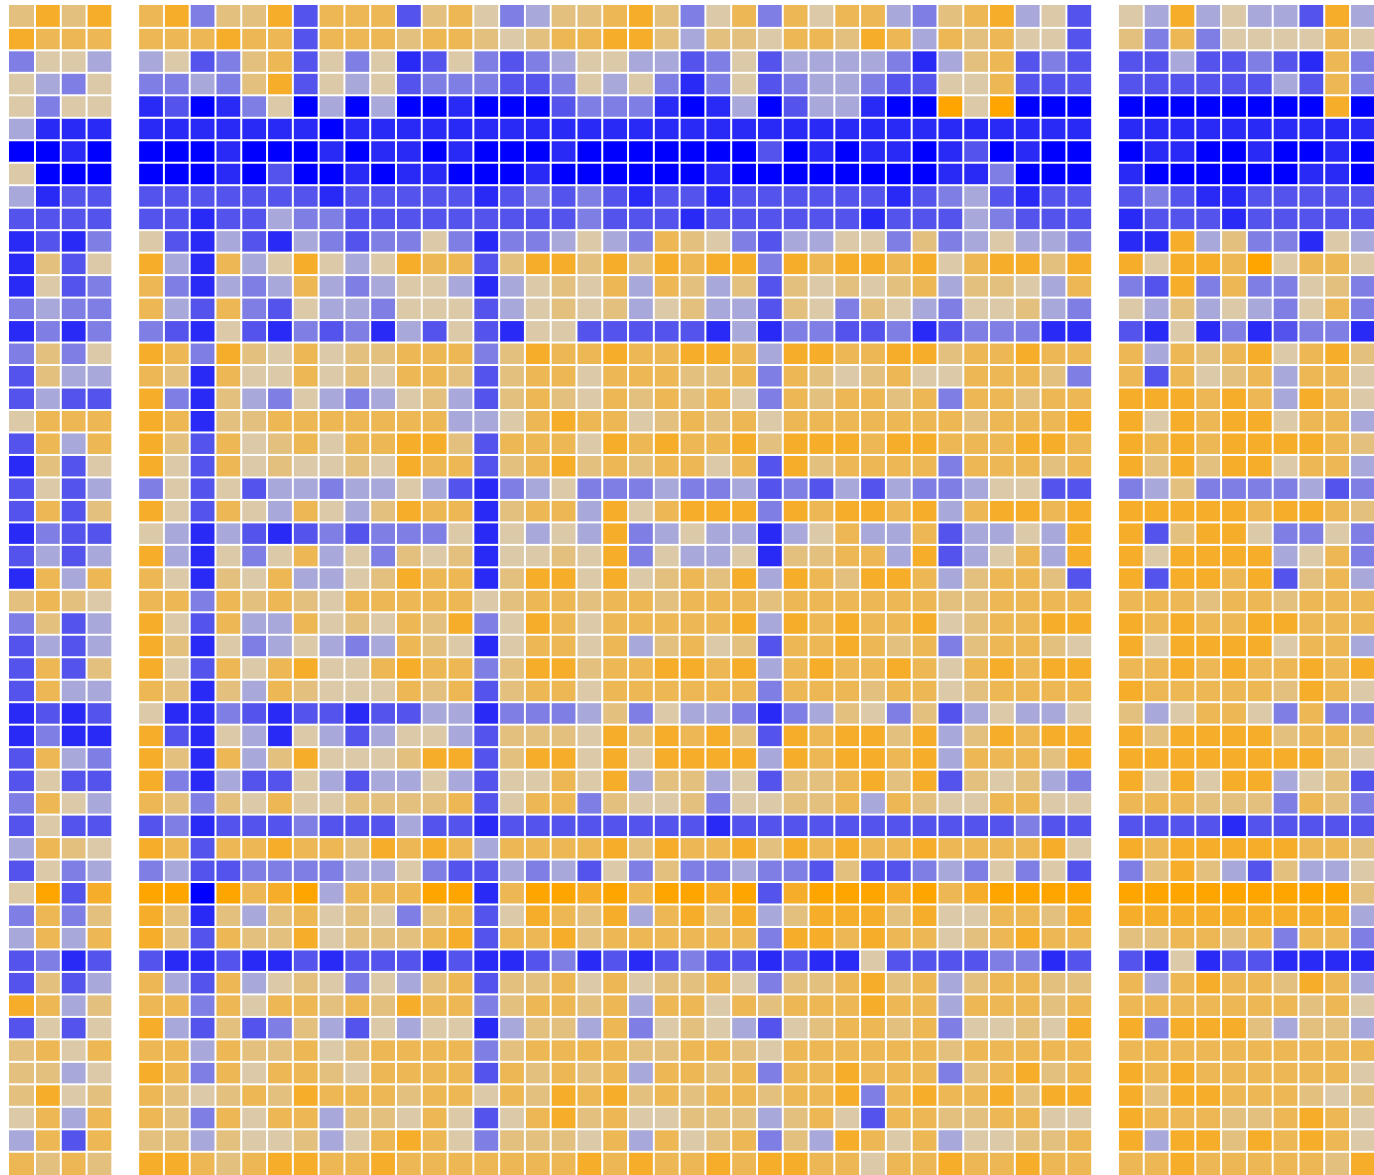

cg00850538  
 cg15371815  
 cg00785193  
 cg11324999  
 cg26097549  
 cg17930183  
 cg14153319  
 cg08583611  
 cg18480233  
 cg15651394  
 cg09530108  
 cg23273465  
 cg21520549  
 cg20348189  
 cg01958295  
 cg00762705  
 cg01154283  
 cg14446951  
 cg03888447  
 cg15931894  
 cg01880929  
 cg20719980  
 cg07099009  
 cg08801446  
 cg26271895  
 cg23336143  
 cg11793005  
 cg27638558  
 cg06131211  
 cg15818066  
 cg02629313  
 cg03428619  
 cg20391432  
 cg21932231  
 cg17516469  
 cg01831872  
 cg00068038  
 cg13138680  
 cg01296395  
 cg20215769  
 cg19379845  
 cg23489390  
 cg00296578  
 cg03901532  
 cg27060380  
 cg04154911  
 cg11913694  
 cg22661341  
 cg05507566  
 cg19145710  
 cg19570155  
 cg10550416

GeneLoc  
 PromoterAssoc  
 CpGIsland

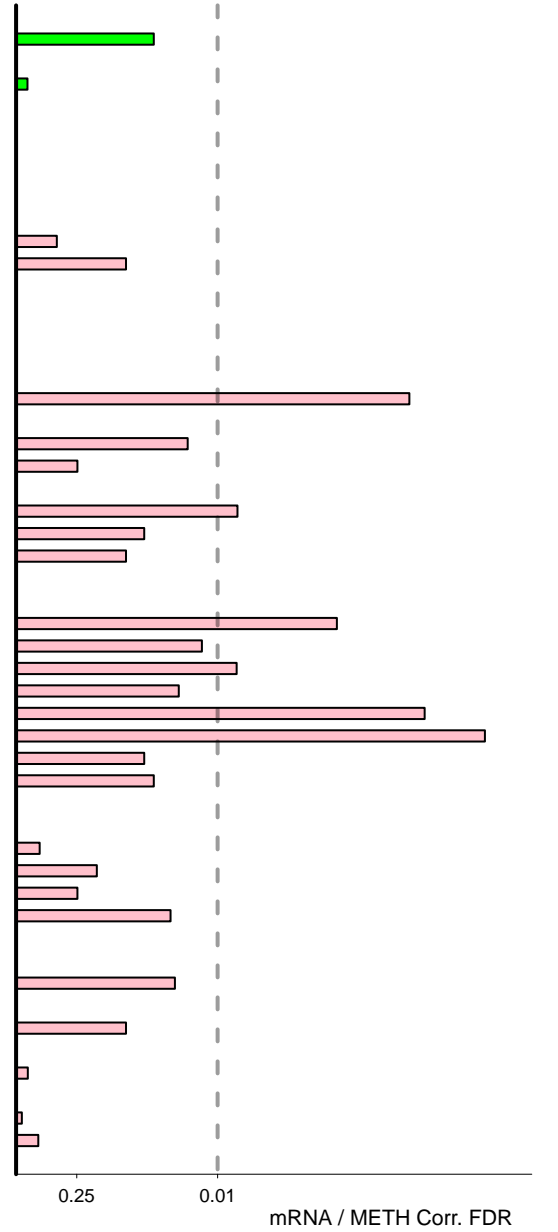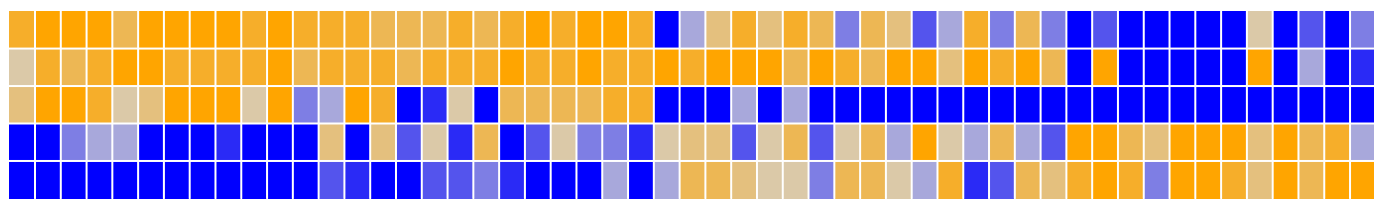

MITF  
 SOX10  
 TRPM1  
 ZEB1  
 AXL

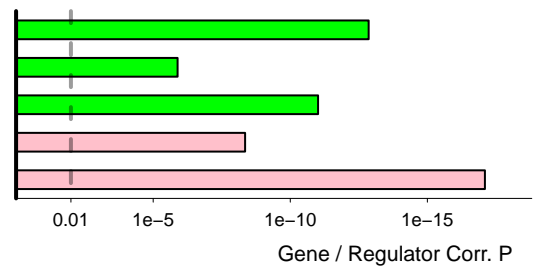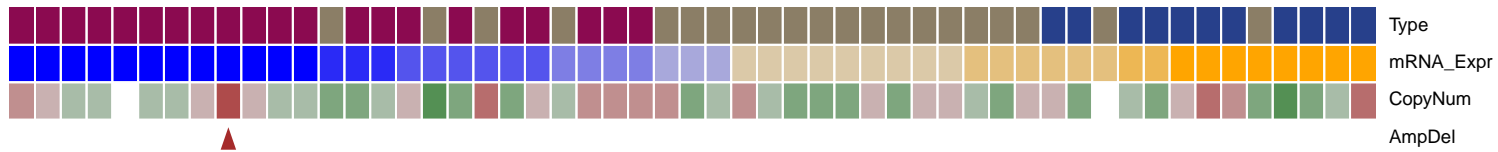

S2357  
 S2391  
 S2765  
 S2216  
 S2667  
 S2279  
 S2408  
 S2374  
 S2521  
 S2189  
 S2400  
 S2373  
 S2247  
 S2330  
 S2379  
 S2761  
 S2333  
 S2668  
 S2380  
 S2508  
 S2406  
 S2596  
 S2718  
 S2320  
 S2510  
 S2549  
 S2650  
 S2153  
 S2097  
 S2767  
 S2381  
 S2392  
 S2654  
 S2423  
 S2812  
 S2495  
 S2800  
 S2734  
 S2645  
 S2410  
 S2405  
 S2470  
 S2350  
 S2338  
 S2686  
 S2770A  
 S2356  
 S2261  
 S2365  
 S2125  
 S2583  
 S2688  
 S2731



# ANTXR2

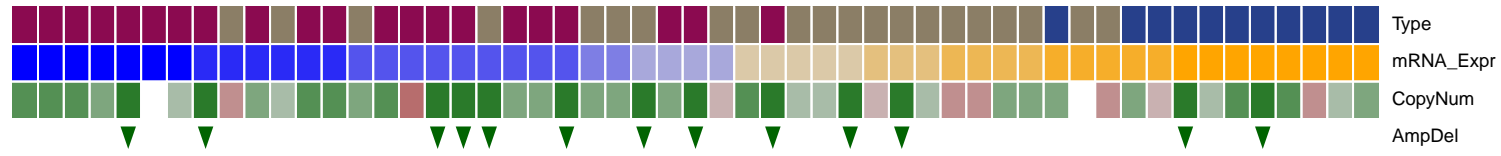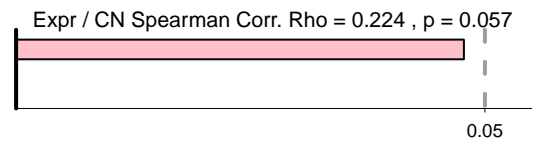

4 : 81047158  
 4 : 80994605  
 4 : 80994550  
 4 : 80994480  
 4 : 80994236  
 4 : 80993819  
 4 : 80993552  
 4 : 80992999  
 4 : 80991289  
 4 : 80977666  
 4 : 80977132  
 4 : 80933006  
 4 : 80886264  
 4 : 80886143  
 4 : 80885981  
 4 : 80885735  
 4 : 80885348  
 4 : 80885279  
 4 : 80883595  
 4 : 80869858  
 4 : 80836552  
 4 : 80832187  
 4 : 80823062

GeneLoc  
 PromoterAssoc  
 CpGIsland

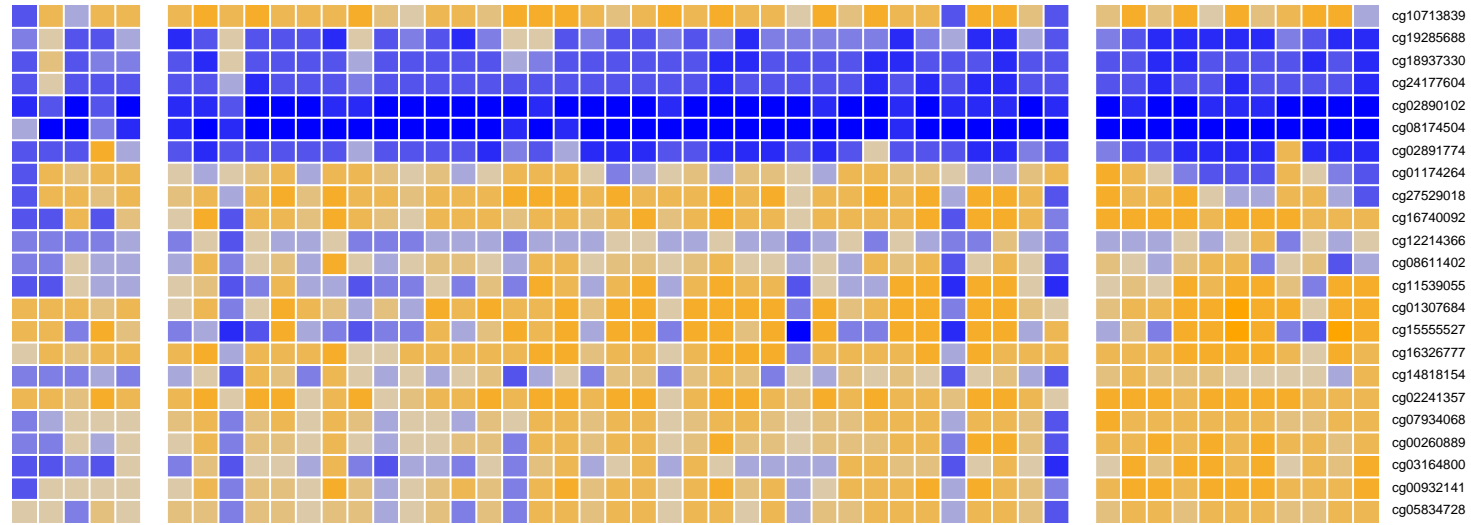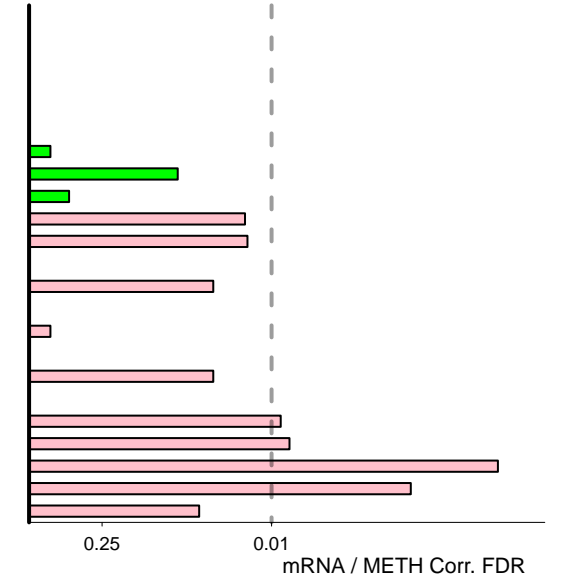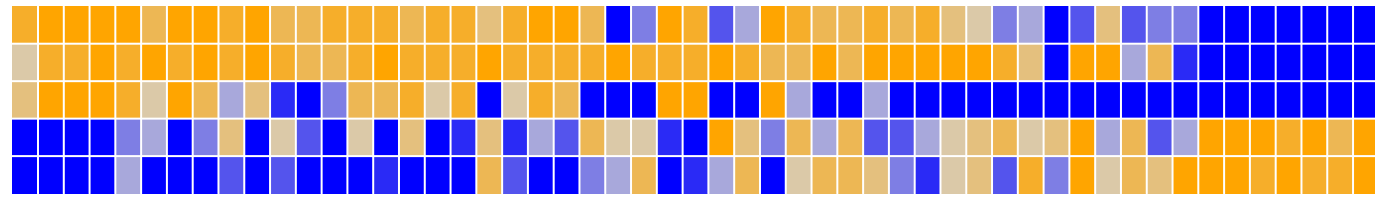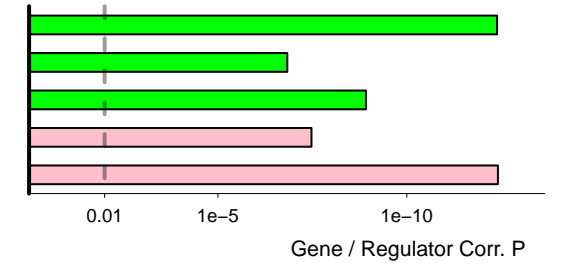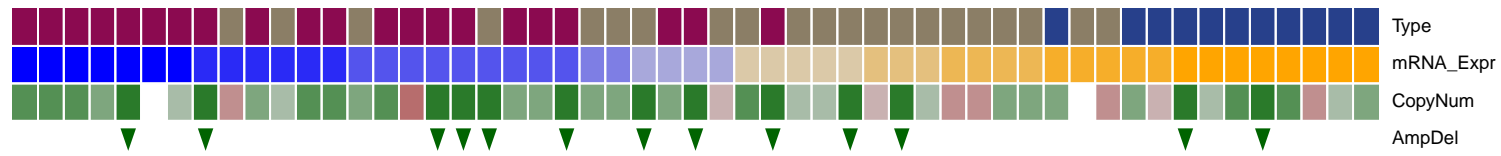

S2357  
 S2391  
 S2374  
 S2400  
 S2320  
 S2667  
 S2408  
 S2718  
 S2247  
 S2279  
 S2333  
 S2761  
 S2373  
 S2596  
 S2508  
 S2379  
 S2189  
 S2510  
 S2153  
 S2668  
 S2216  
 S2406  
 S2380  
 S2549  
 S2654  
 S2521  
 S2330  
 S2495  
 S2650  
 S2765  
 S2381  
 S2410  
 S2423  
 S2097  
 S2392  
 S2734  
 S2767  
 S2365  
 S2645  
 S2800  
 S2686  
 S2350  
 S2812  
 S2583  
 S2405  
 S2731  
 S2125  
 S2770A  
 S2470  
 S2688  
 S2261  
 S2338  
 S2356

# KCNMA1

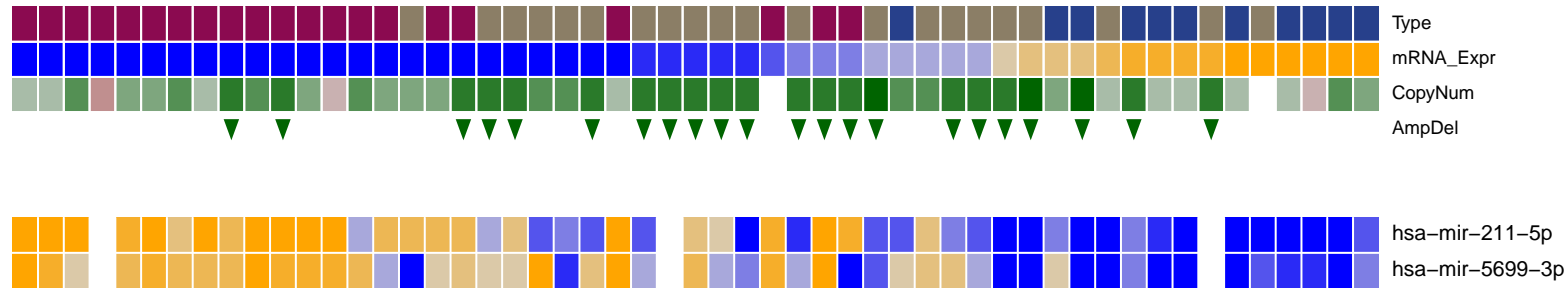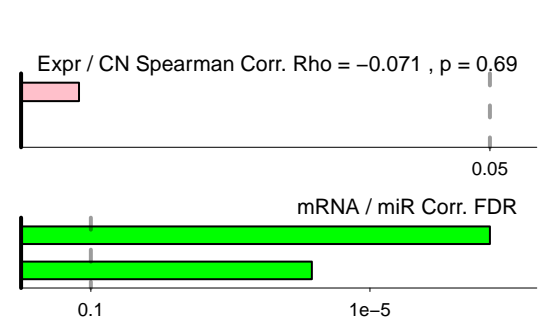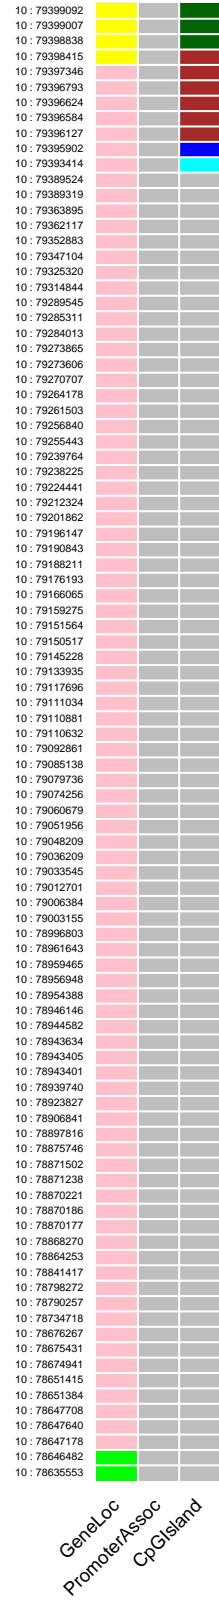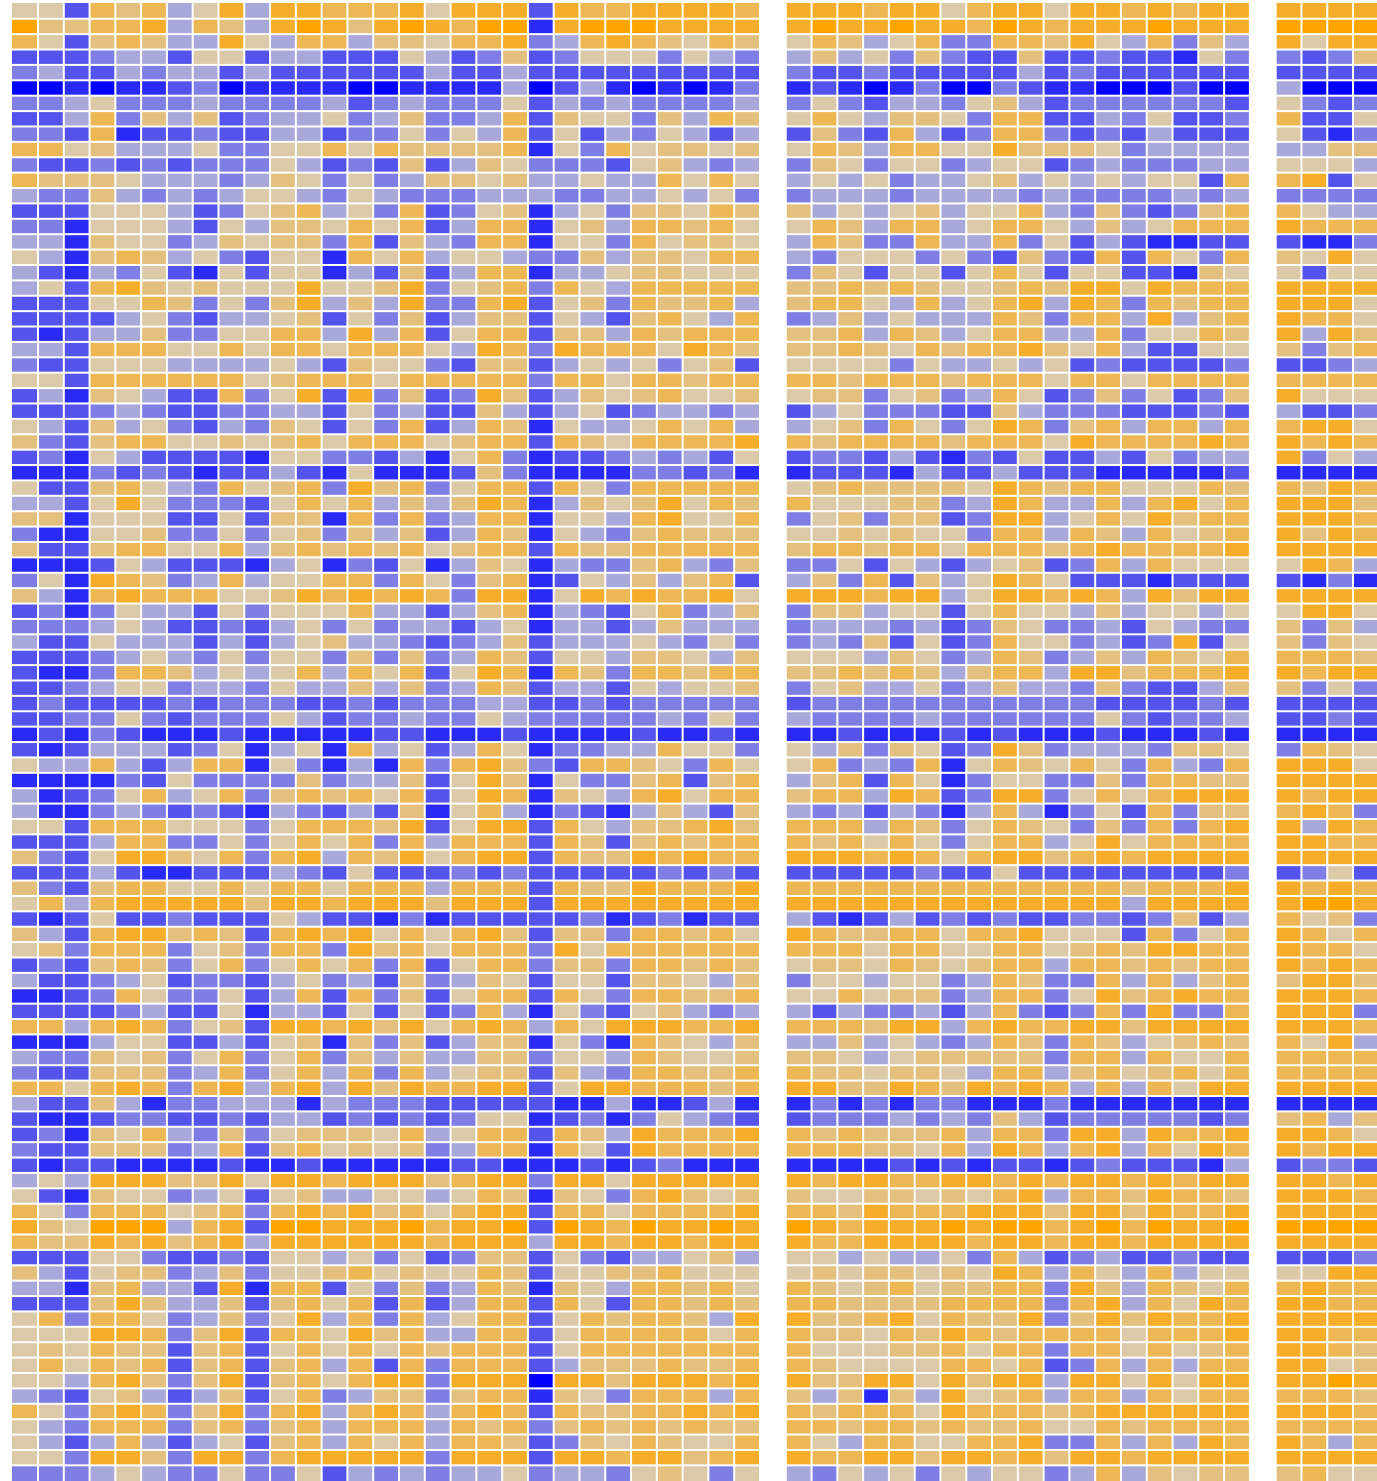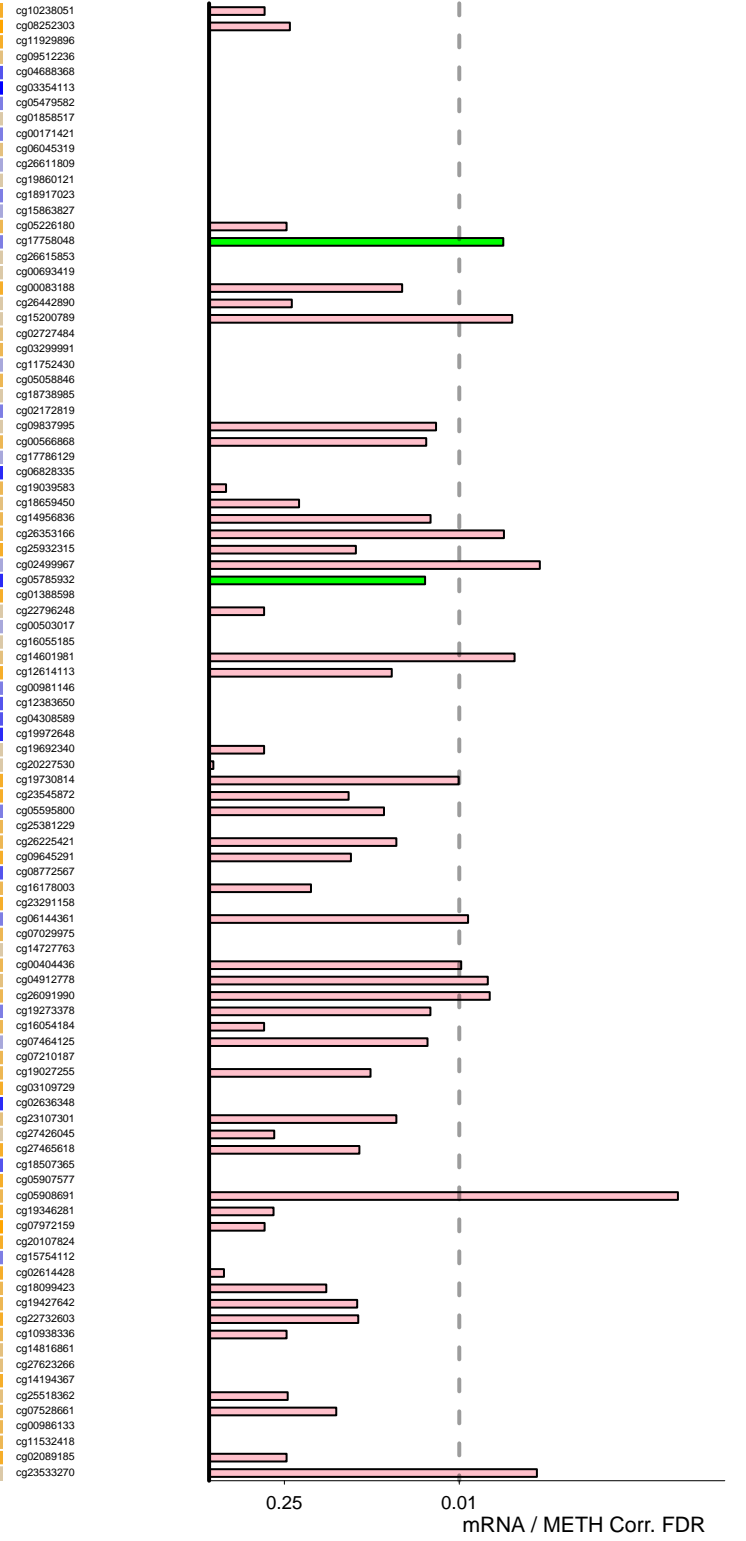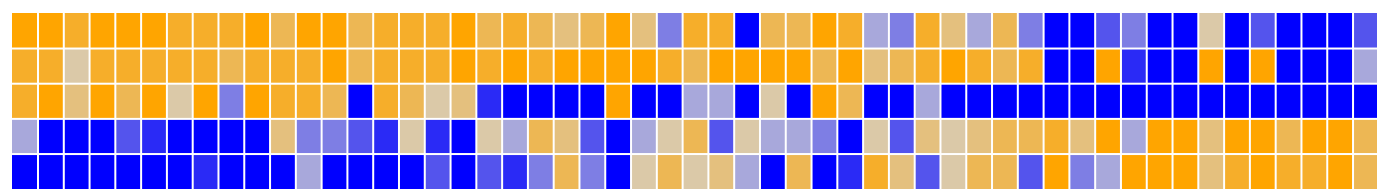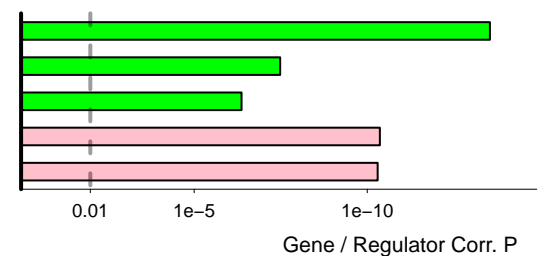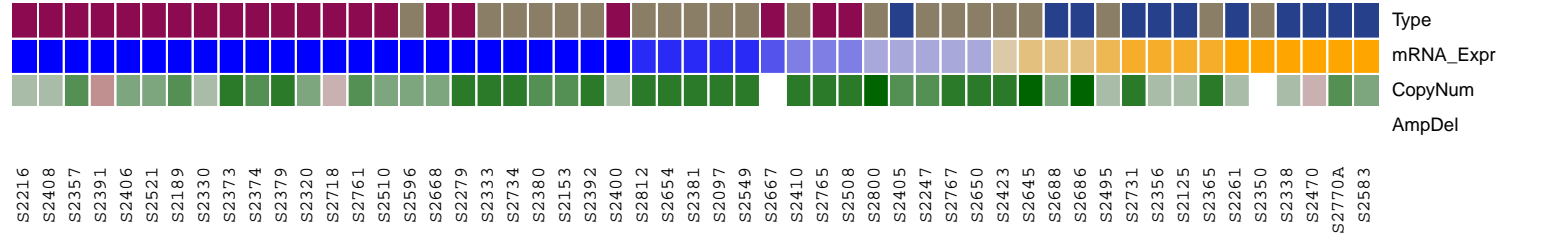

S2216  
S2408  
S2357  
S2391  
S2406  
S2521  
S2189  
S2330  
S2373  
S2374  
S2379  
S2320  
S2718  
S2761  
S2510  
S2596  
S2668  
S2279  
S2333  
S2734  
S2380  
S2153  
S2392  
S2400  
S2812  
S2654  
S2381  
S2097  
S2549  
S2667  
S2410  
S2765  
S2508  
S2800  
S2405  
S2247  
S2767  
S2650  
S2423  
S2645  
S2688  
S2686  
S2495  
S2731  
S2356  
S2125  
S2365  
S2261  
S2350  
S2338  
S2470  
S2770A  
S2553

# AXL

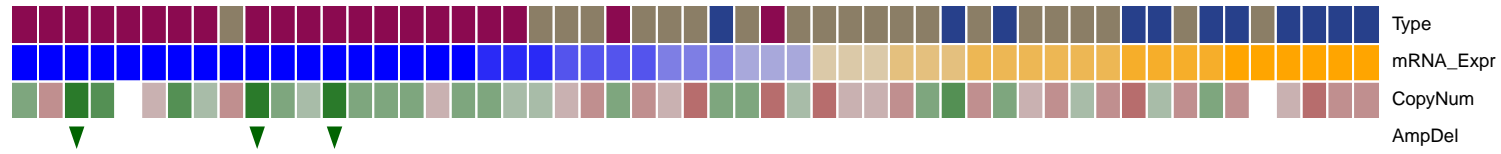

19 : 41724129  
 19 : 41724208  
 19 : 41724653  
 19 : 41724898  
 19 : 41725053  
 19 : 41725152  
 19 : 41725202  
 19 : 41725332  
 19 : 41729657  
 19 : 41731934  
 19 : 41732589  
 19 : 41767669

GeneLoc  
 PromoterAssoc  
 CpGIsland

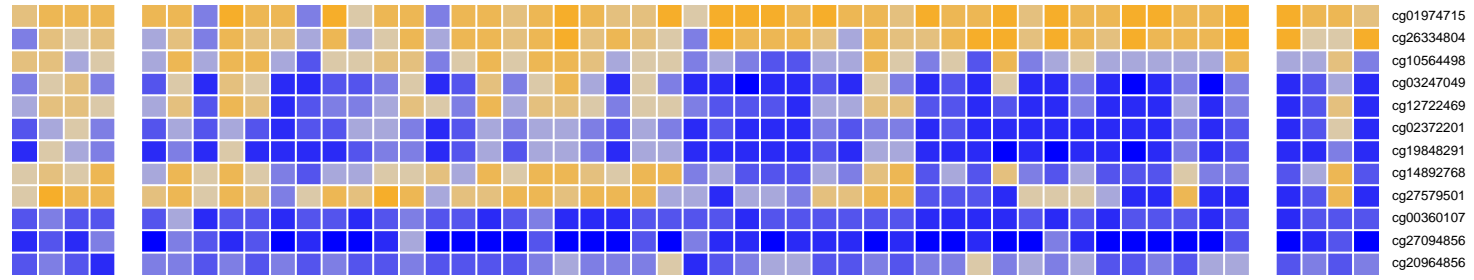

cg01974715  
 cg26334804  
 cg10564498  
 cg03247049  
 cg12722469  
 cg02372201  
 cg19848291  
 cg14892768  
 cg27579501  
 cg00360107  
 cg27094856  
 cg20964856

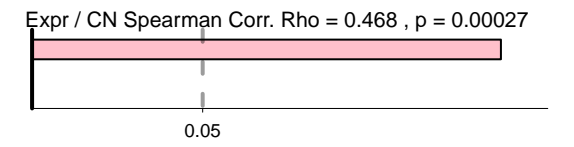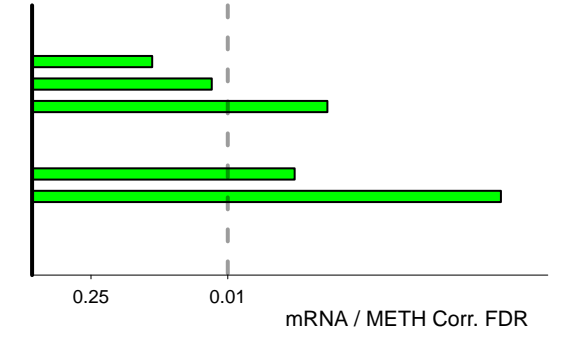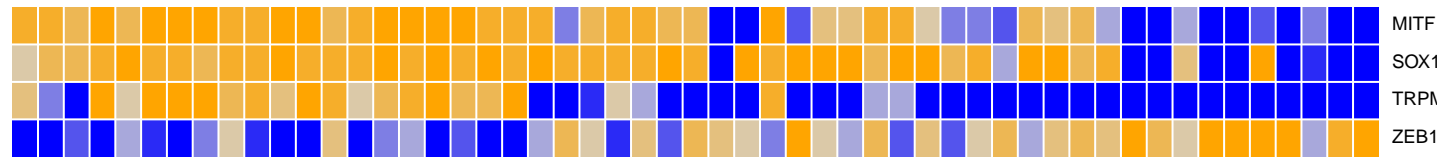

MITF  
 SOX10  
 TRPM1  
 ZEB1

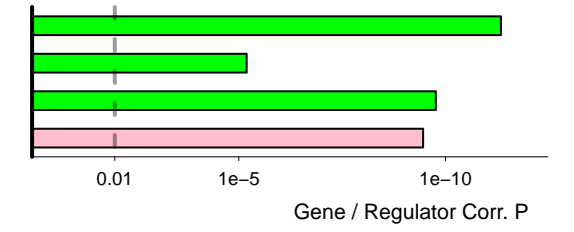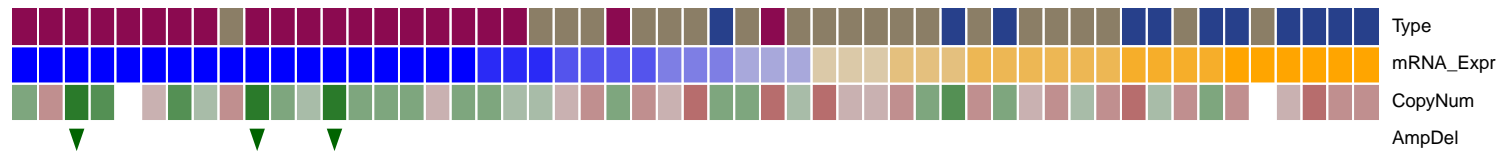

S2357  
 S2373  
 S2761  
 S2374  
 S2667  
 S2521  
 S2391  
 S2765  
 S2596  
 S2510  
 S2279  
 S2408  
 S2379  
 S2189  
 S2718  
 S2216  
 S2400  
 S2406  
 S2508  
 S2330  
 S2734  
 S2645  
 S2333  
 S2668  
 S2247  
 S2392  
 S2380  
 S2686  
 S2549  
 S2320  
 S2495  
 S2767  
 S2812  
 S2381  
 S2097  
 S2365  
 S2405  
 S2654  
 S2583  
 S2410  
 S2153  
 S2423  
 S2650  
 S2470  
 S2338  
 S2800  
 S2261  
 S2770A  
 S2350  
 S2356  
 S2731  
 S2688  
 S2125

Type  
 mRNA\_Expr  
 CopyNum  
 AmpDel

# COL13A1

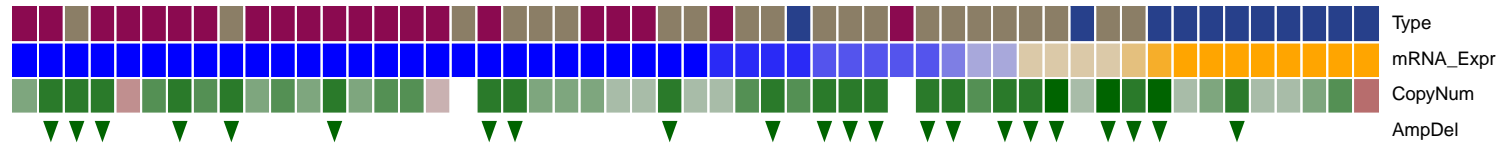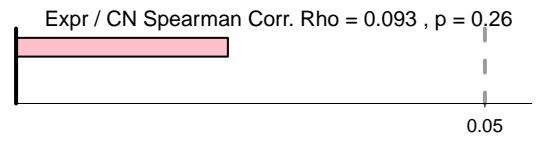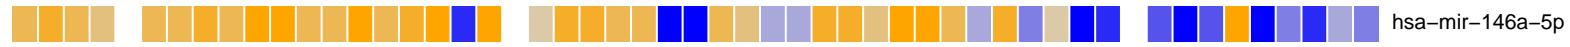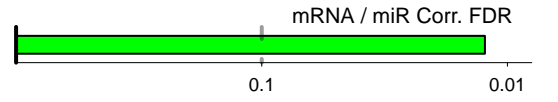

- 10 : 71560212
- 10 : 71560231
- 10 : 71561211
- 10 : 71562095
- 10 : 71562677
- 10 : 71562858
- 10 : 71563776
- 10 : 71570077
- 10 : 71570779
- 10 : 71570947
- 10 : 71576245
- 10 : 71577188
- 10 : 71582505
- 10 : 71583235
- 10 : 71583676
- 10 : 71583771
- 10 : 71588009
- 10 : 71590176
- 10 : 71596731
- 10 : 71598949
- 10 : 71601361
- 10 : 71607076
- 10 : 71608654
- 10 : 71612717
- 10 : 71615835
- 10 : 71626580
- 10 : 71632008
- 10 : 71634316
- 10 : 71640467
- 10 : 71641786
- 10 : 71659774
- 10 : 71661228
- 10 : 71662052
- 10 : 71672083
- 10 : 71672822
- 10 : 71689487
- 10 : 71712830
- 10 : 71718679
- 10 : 71722050

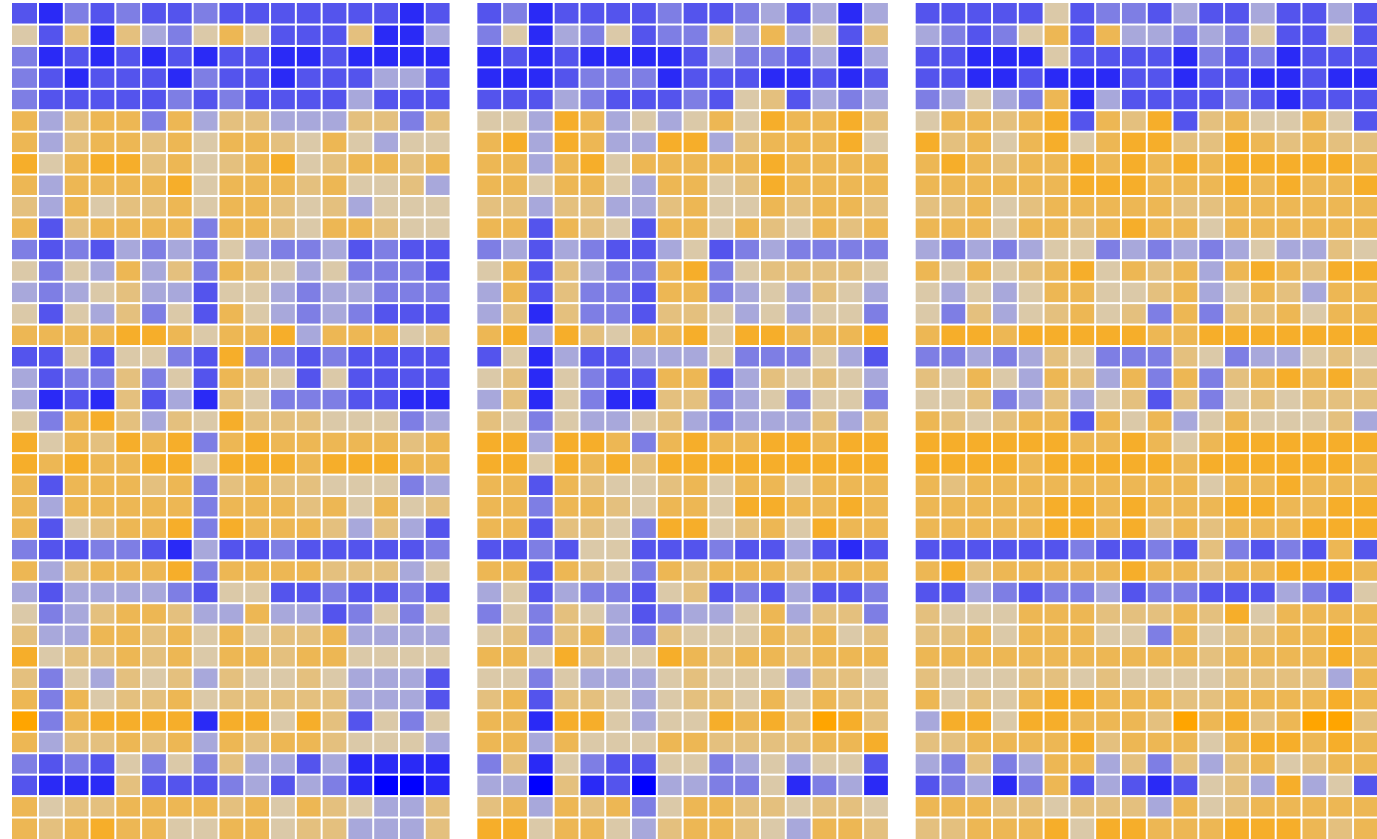

- cg06035456
- cg10314139
- cg23620639
- cg06759405
- cg03284055
- cg02875787
- cg15334916
- cg11709763
- cg23386779
- cg06633739
- cg03525069
- cg00712181
- cg23013664
- cg07630274
- cg19531732
- cg20696214
- cg17319294
- cg16628039
- cg17477052
- cg20516176
- cg09716878
- cg12873612
- cg14685948
- cg26728770
- cg20436086
- cg13680337
- cg14961117
- cg15256053
- cg03876766
- cg14179150
- cg13650687
- cg00661347
- cg20740485
- cg27268279
- cg05222243
- cg09082487
- cg09355528
- cg07081753
- cg01330741

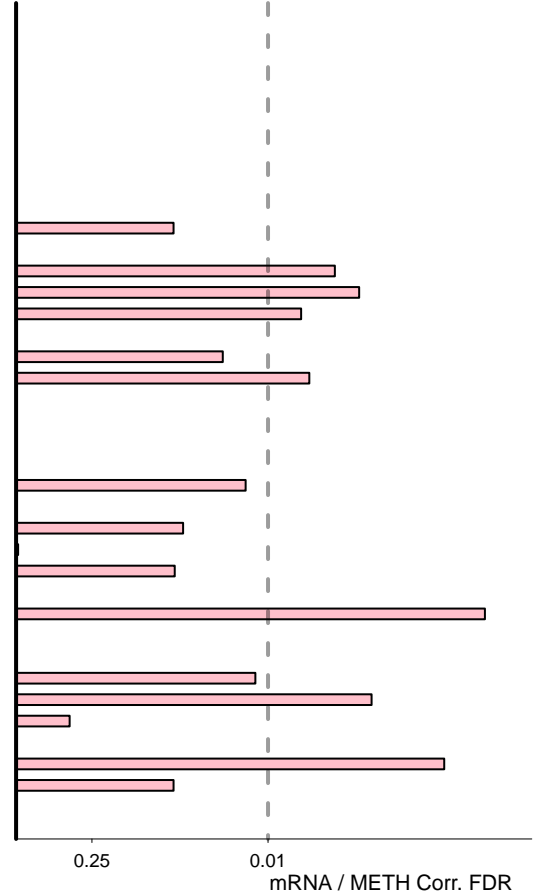

GeneLoc  
PromoterAssoc  
CpGIsland

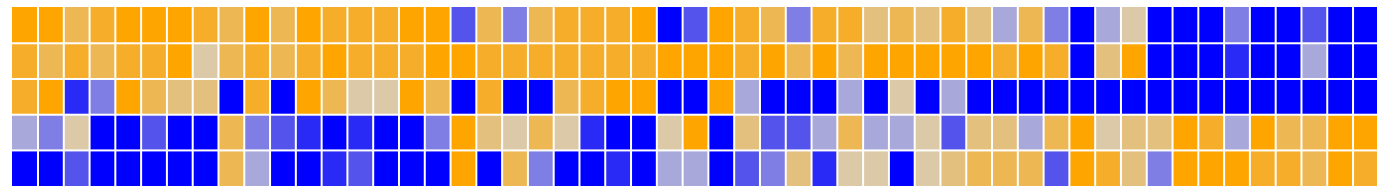

- MITF
- SOX10
- TRPM1
- ZEB1
- AXL

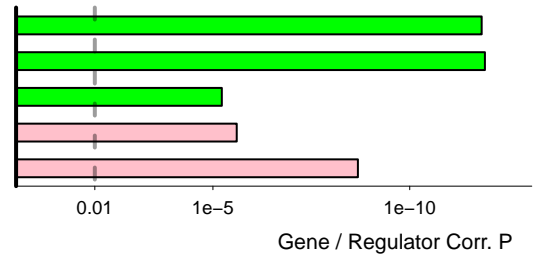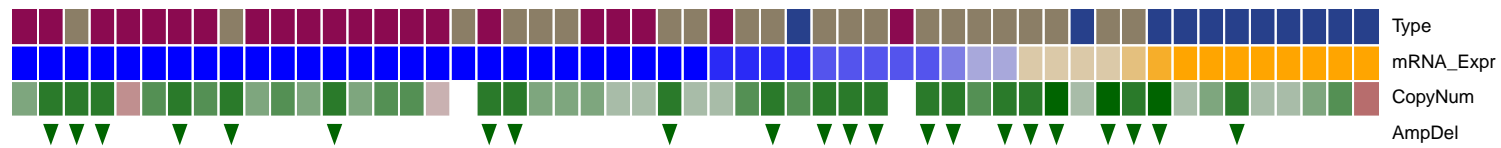

- S2216
- S2765
- S2333
- S2373
- S2391
- S2406
- S2279
- S2357
- S2423
- S2320
- S2761
- S2521
- S2508
- S2668
- S2189
- S2374
- S2718
- S2350
- S2379
- S2654
- S2380
- S2596
- S2510
- S2330
- S2408
- S2549
- S2495
- S2400
- S2247
- S2392
- S2405
- S2734
- S2381
- S2812
- S2667
- S2767
- S2097
- S2153
- S2650
- S2410
- S2645
- S2125
- S2800
- S2365
- S2686
- S2356
- S2688
- S2731
- S2261
- S2338
- S2583
- S2770A
- S2470

# RIN2

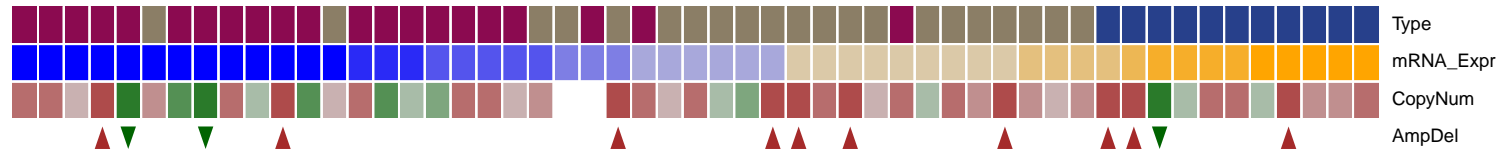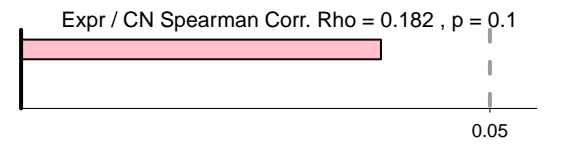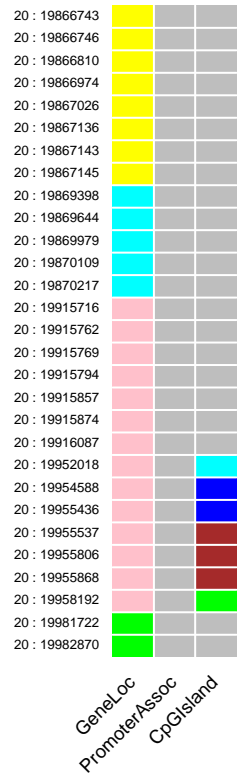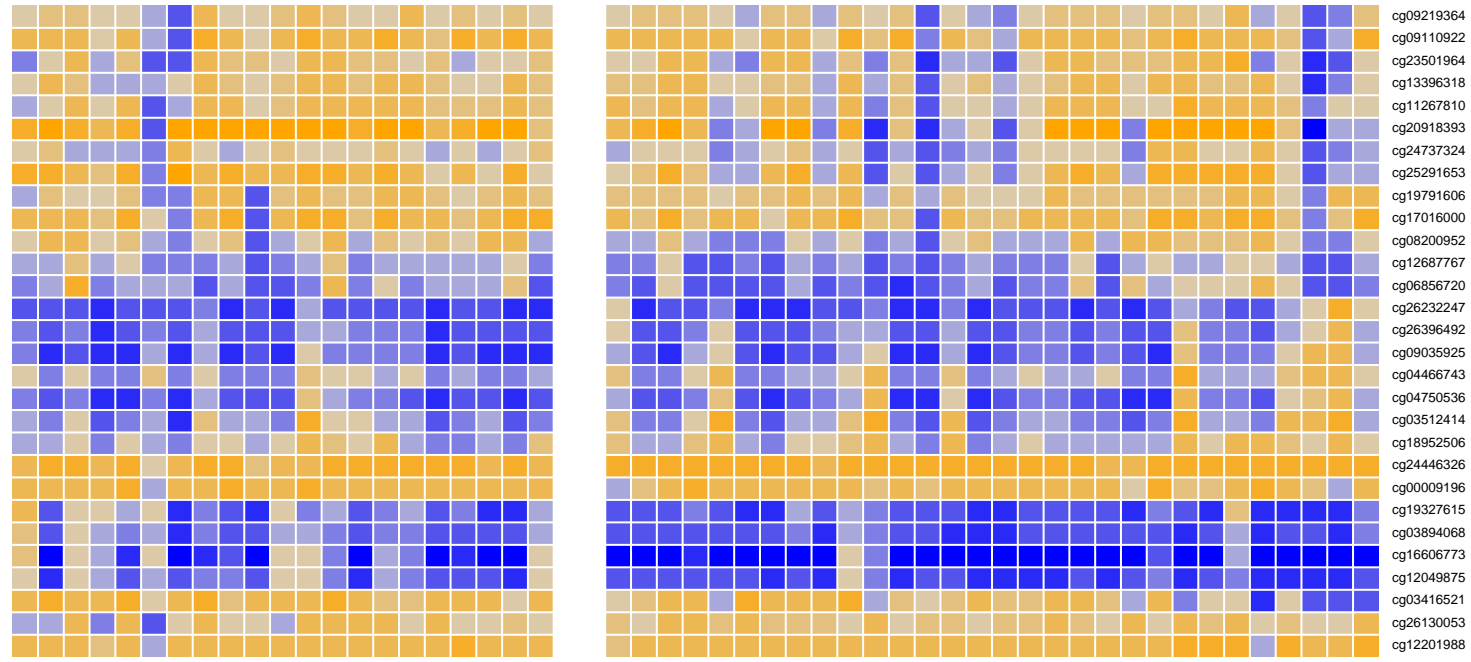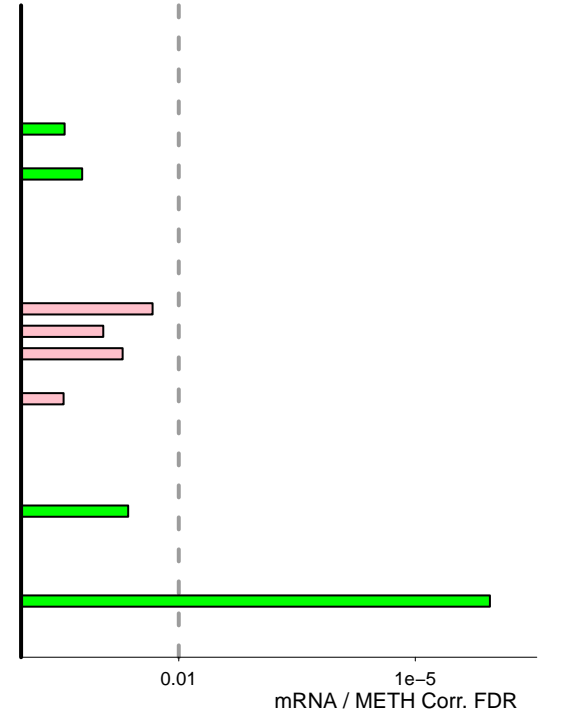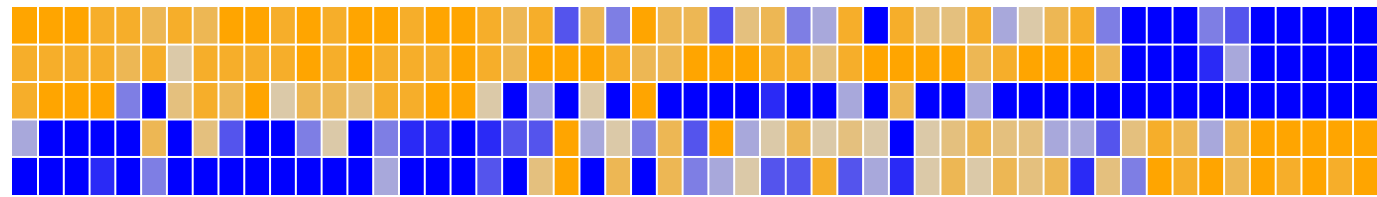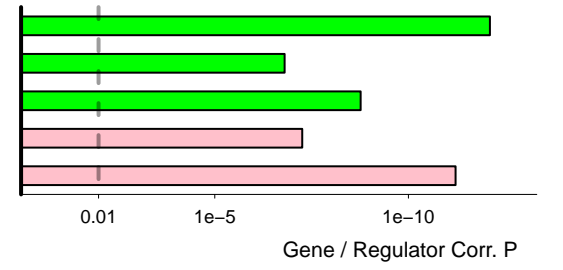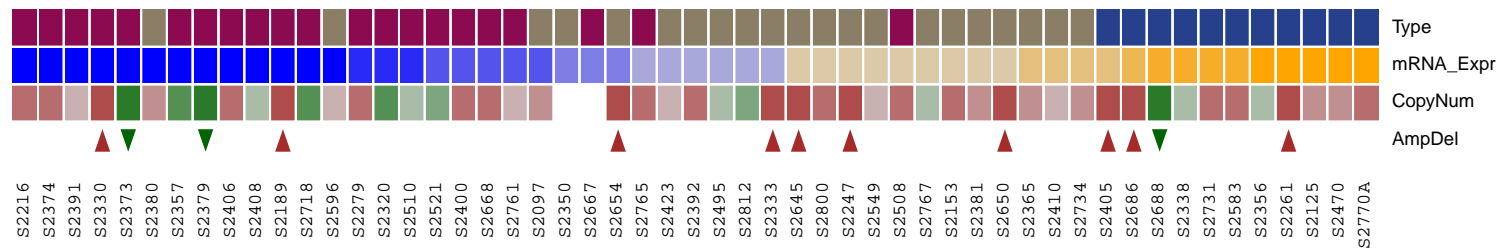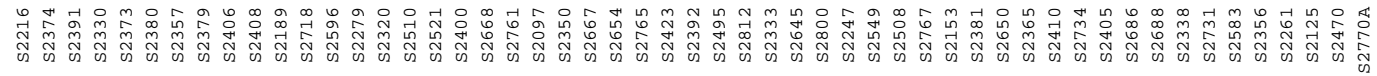

# ADAMTS12

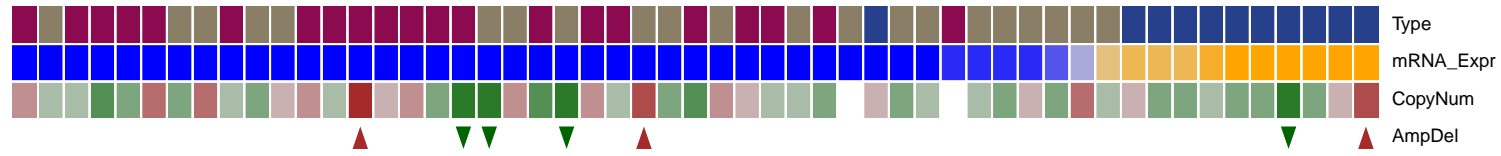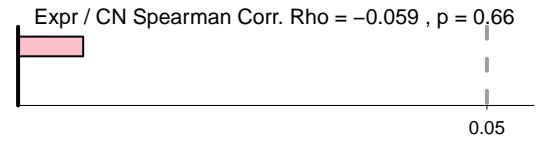

5 : 33893097  
5 : 33892705  
5 : 33892621  
5 : 33892429  
5 : 33892223  
5 : 33890324  
5 : 33889461  
5 : 33855241  
5 : 33852528  
5 : 33842297  
5 : 33835713  
5 : 33832949  
5 : 33822930  
5 : 33809376  
5 : 33807278  
5 : 33794720  
5 : 33788976  
5 : 33772916  
5 : 33764247  
5 : 33758285  
5 : 33737936  
5 : 33727007  
5 : 33659084  
5 : 33649717  
5 : 33563927

GeneLoc  
PromoterAssoc  
CpGIsland

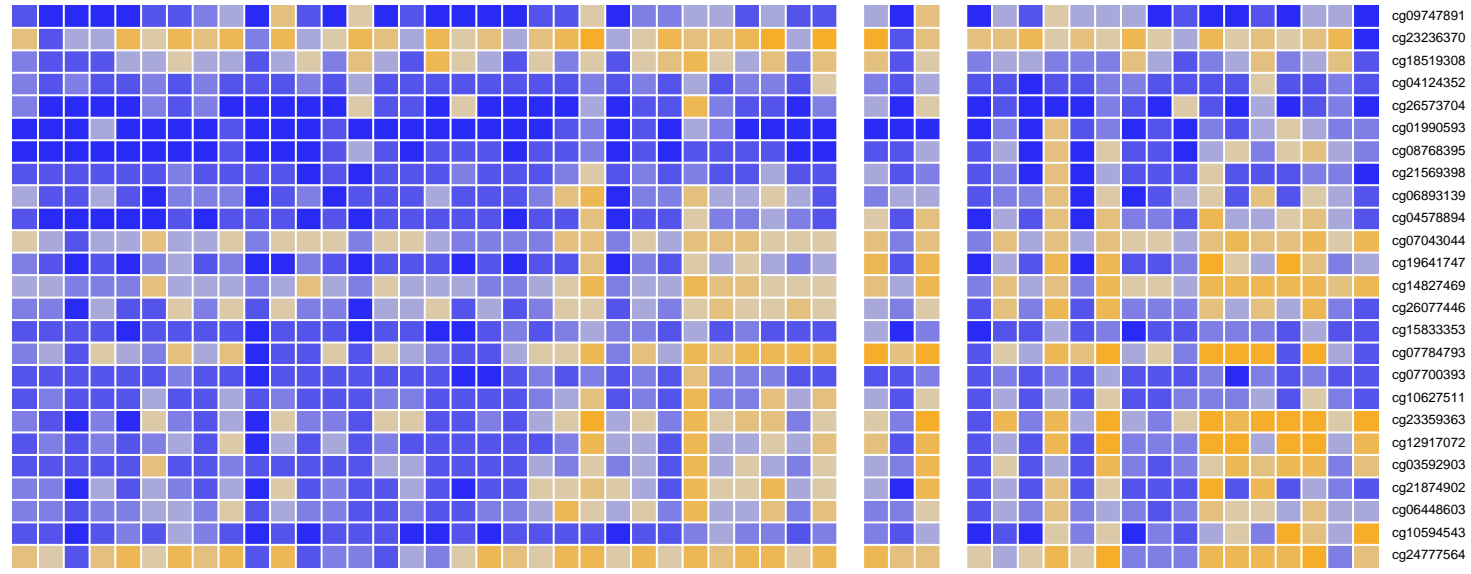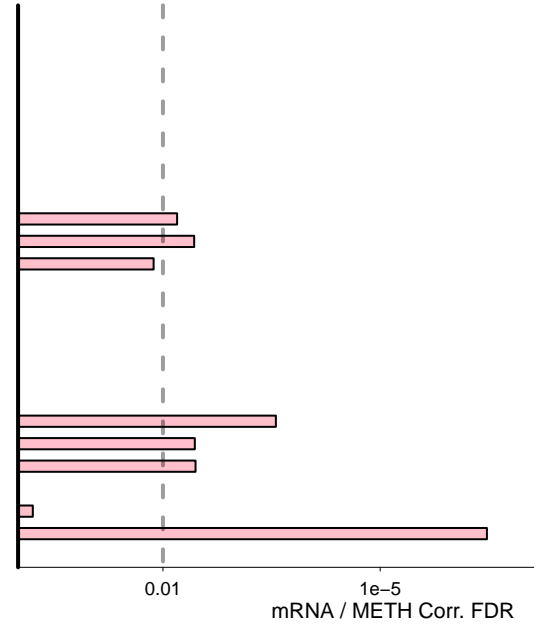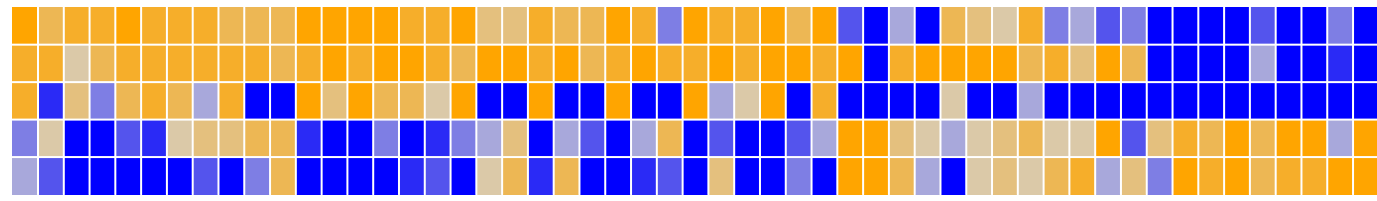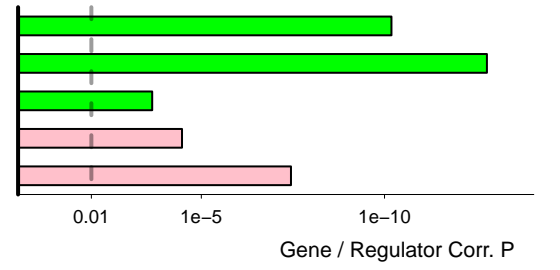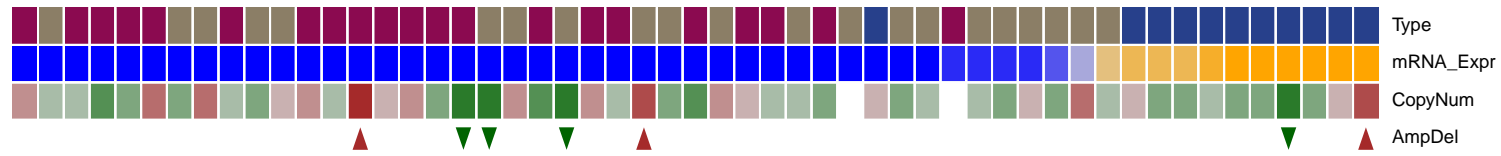

S2320  
S2333  
S2357  
S2373  
S2406  
S2510  
S2596  
S2247  
S2379  
S2380  
S2423  
S2521  
S2279  
S2374  
S2718  
S2508  
S2668  
S2765  
S2812  
S2153  
S2330  
S2410  
S2761  
S2408  
S2734  
S2645  
S2391  
S2097  
S2189  
S2400  
S2392  
S2216  
S2350  
S2770A  
S2650  
S2549  
S2667  
S2767  
S2365  
S2381  
S2654  
S2800  
S2495  
S2405  
S2686  
S2688  
S2338  
S2356  
S2583  
S2470  
S2261  
S2731  
S2125

# GPR39

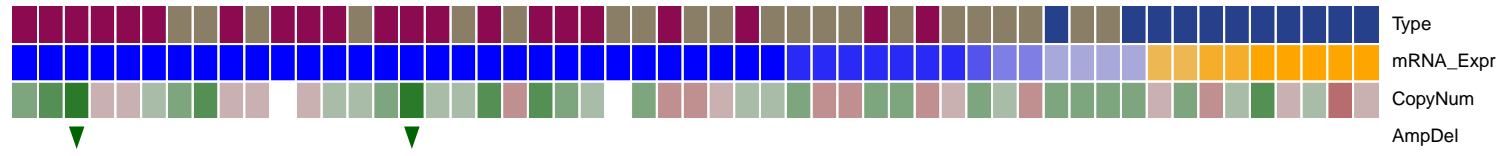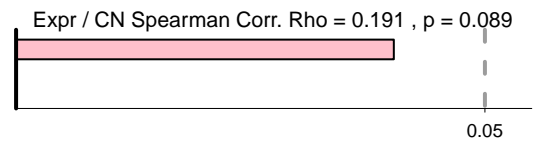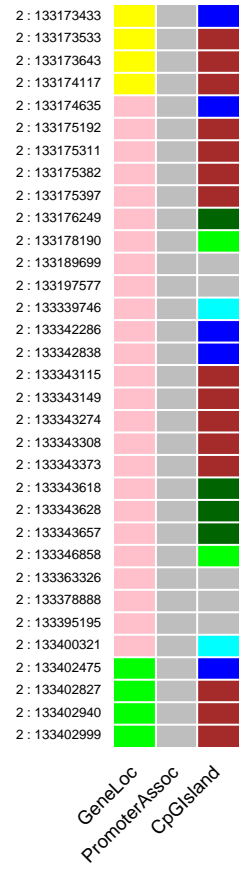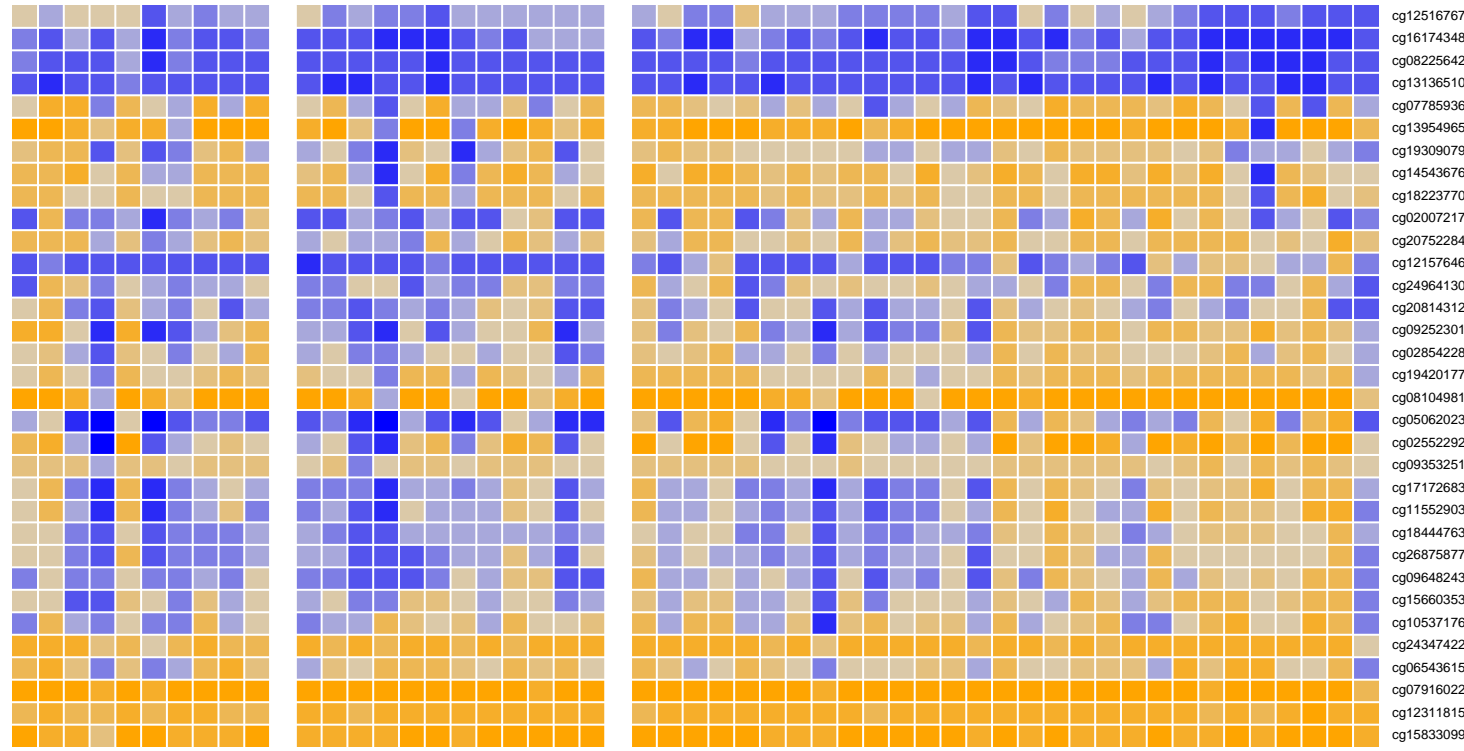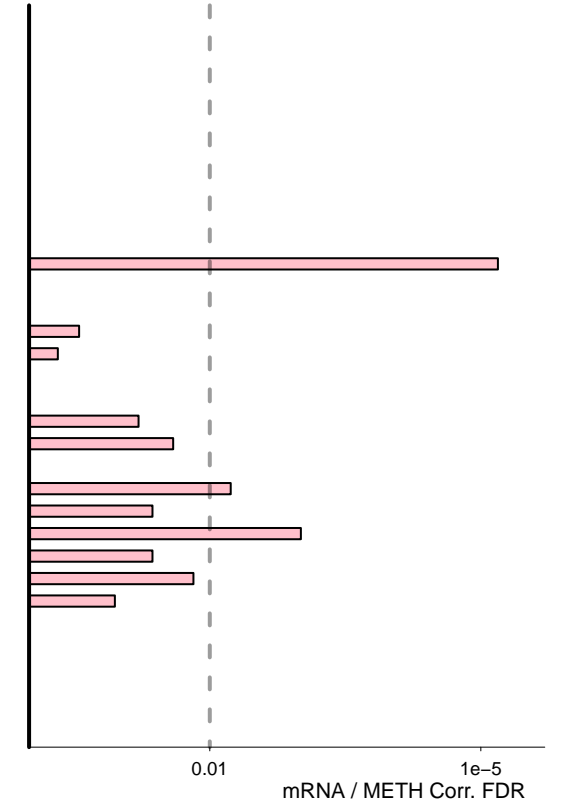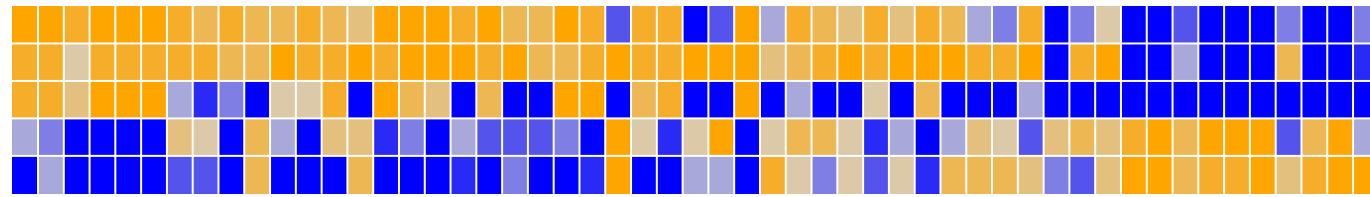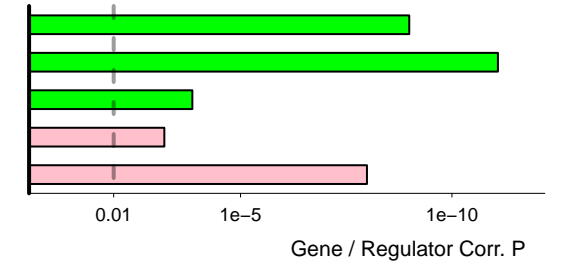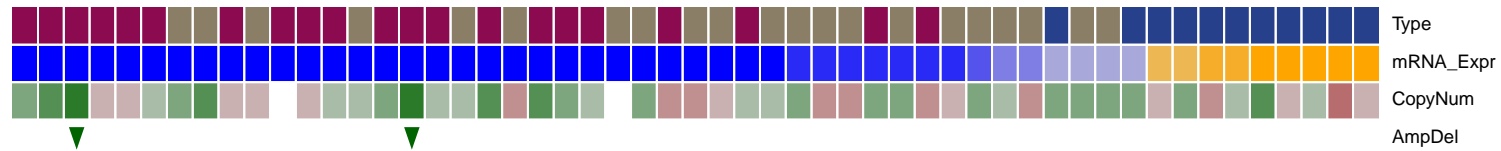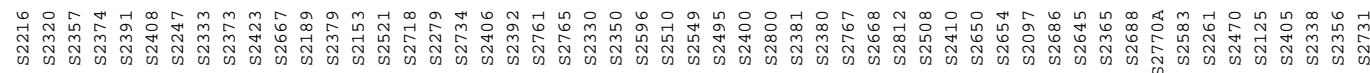

# SERPINE1

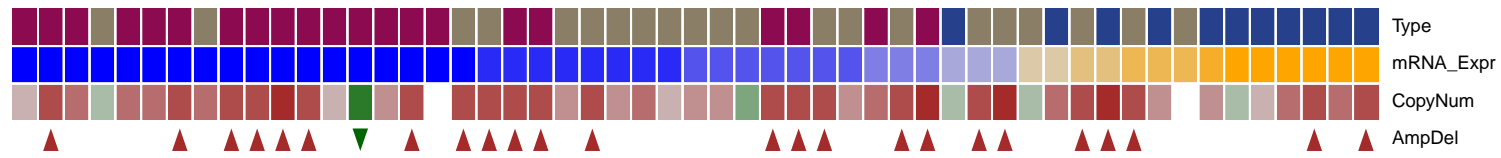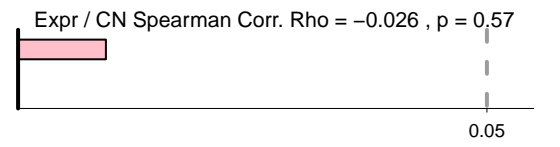

7 : 100769605  
7 : 100769933  
7 : 100770060  
7 : 100770192  
7 : 100770286  
7 : 100770414  
7 : 100770434  
7 : 100770476  
7 : 100773851  
7 : 100774767  
7 : 100774810  
7 : 100777740  
7 : 100781178

GeneLoc  
PromoterAssoc  
CpGIsland

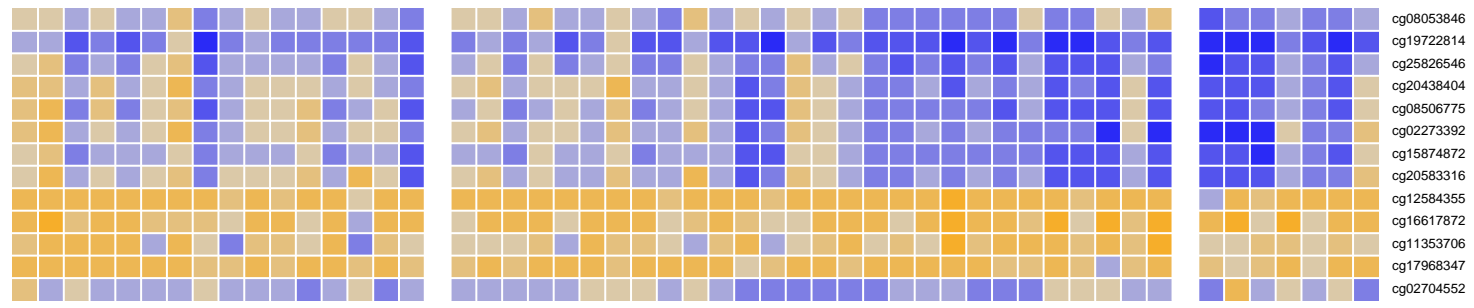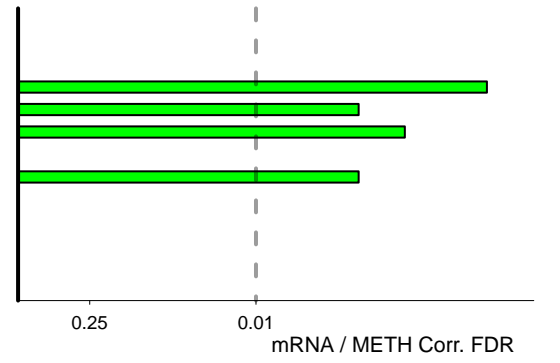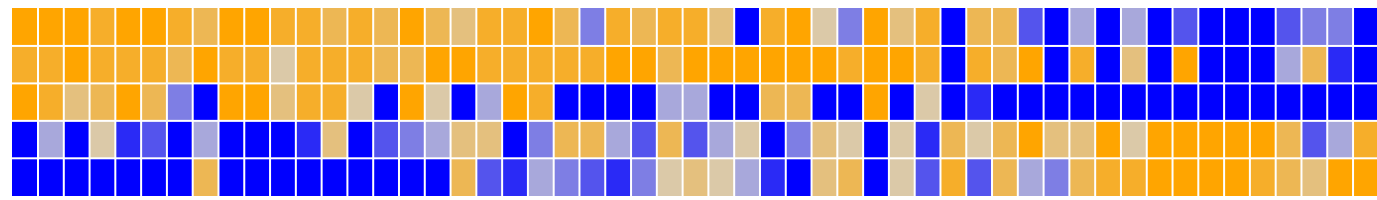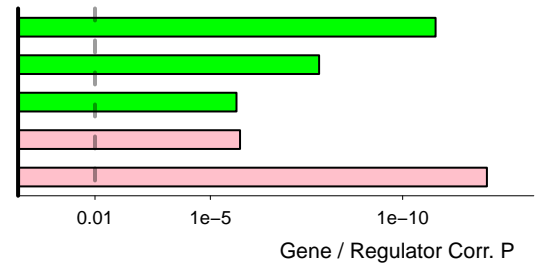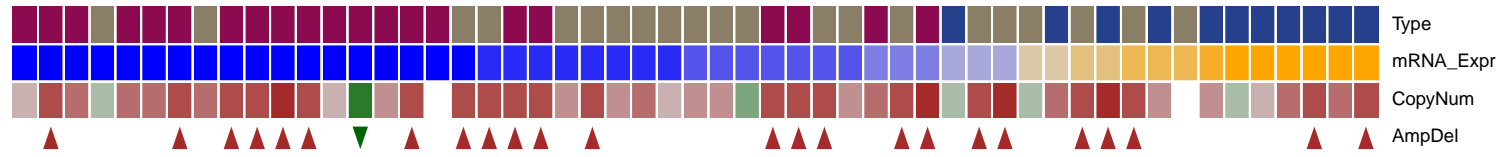

S2391  
S2216  
S2279  
S2596  
S2521  
S2406  
S2373  
S2410  
S2374  
S2408  
S2357  
S2510  
S2379  
S2189  
S2761  
S2765  
S2667  
S2153  
S2247  
S2330  
S2320  
S2380  
S2645  
S2734  
S2392  
S2381  
S2097  
S2812  
S2549  
S2508  
S2718  
S2365  
S2654  
S2400  
S2767  
S2668  
S2338  
S2333  
S2423  
S2495  
S2686  
S2650  
S2470  
S2800  
S2770A  
S2350  
S2125  
S2356  
S2261  
S2583  
S2405  
S2731  
S2688



# LTBP1

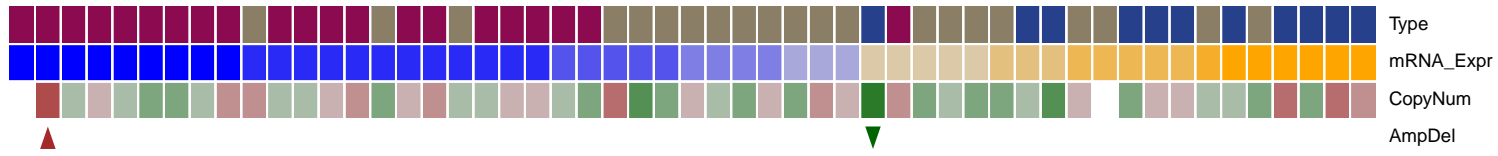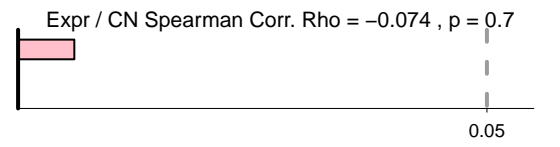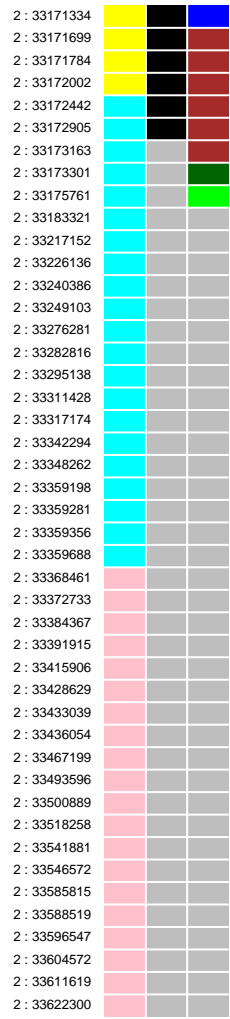

Genes  
PromoterAssoc  
CpGIsland

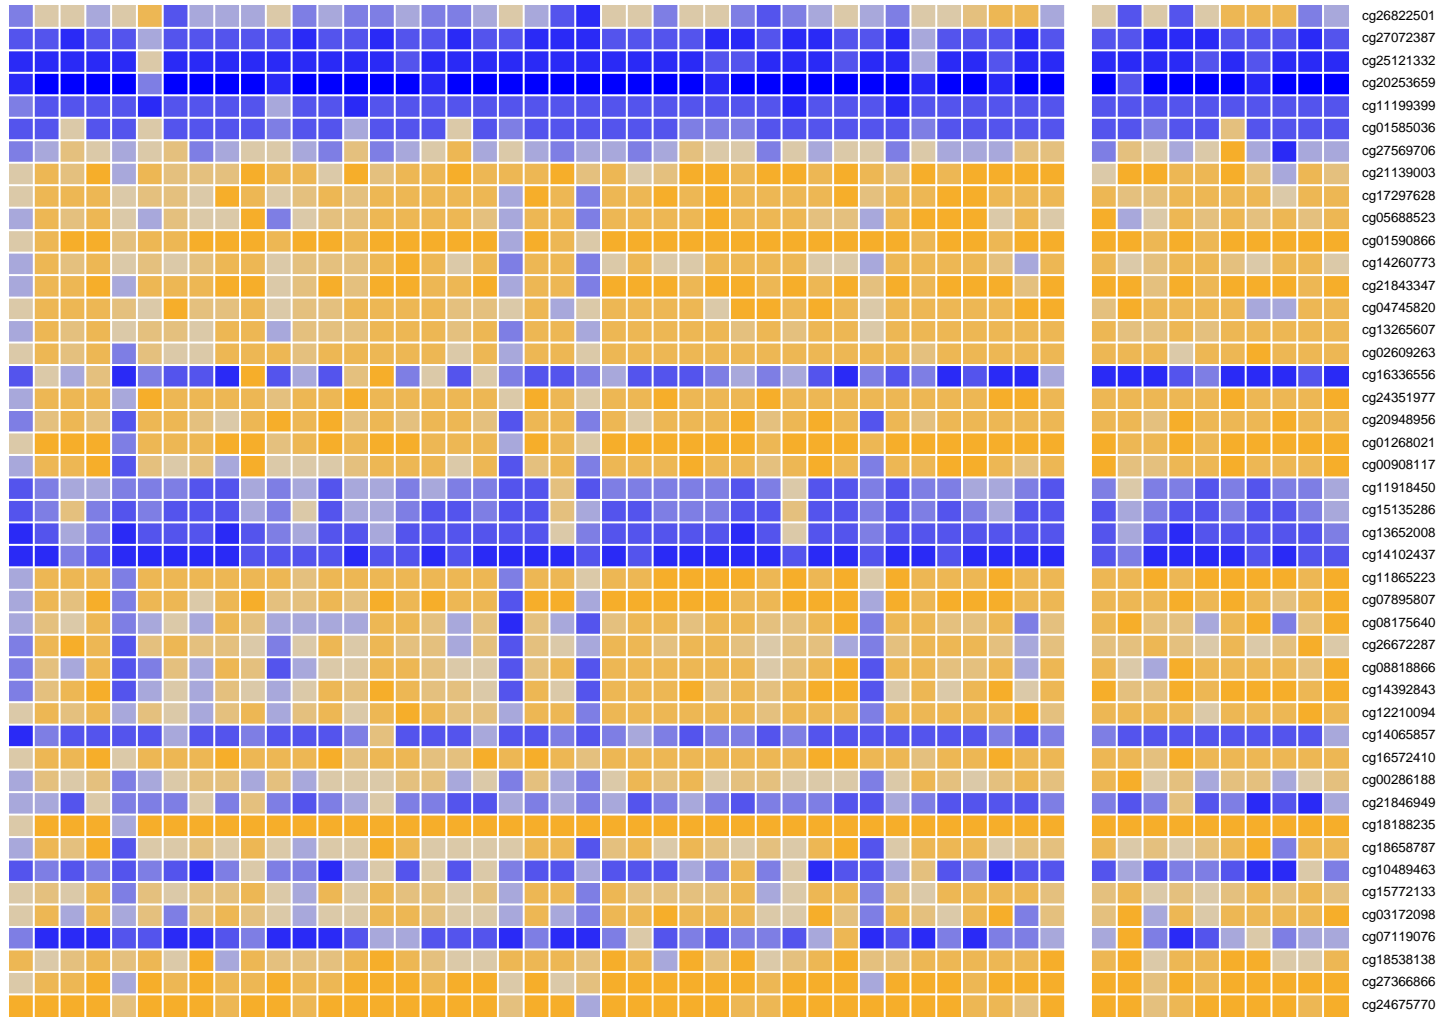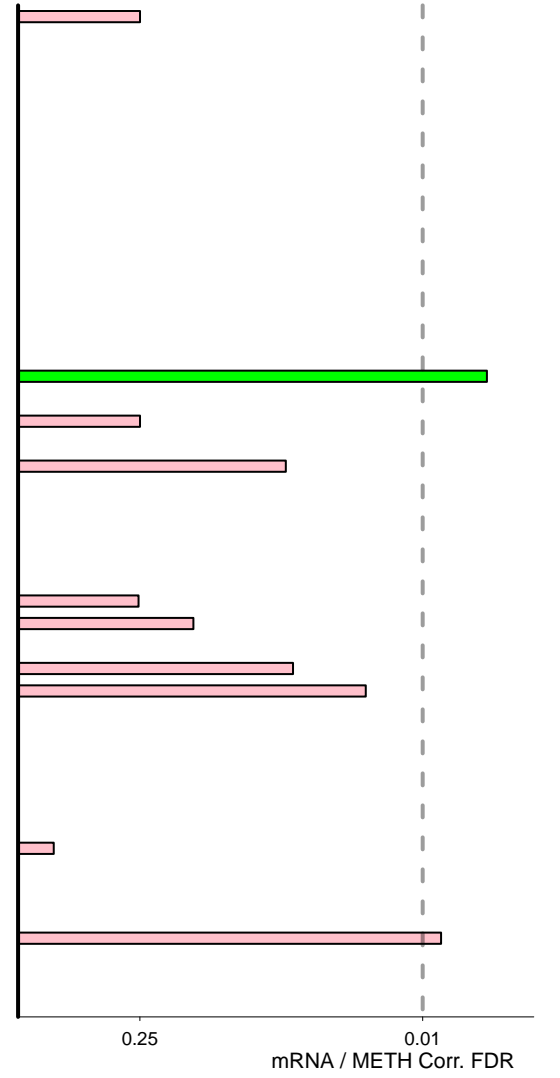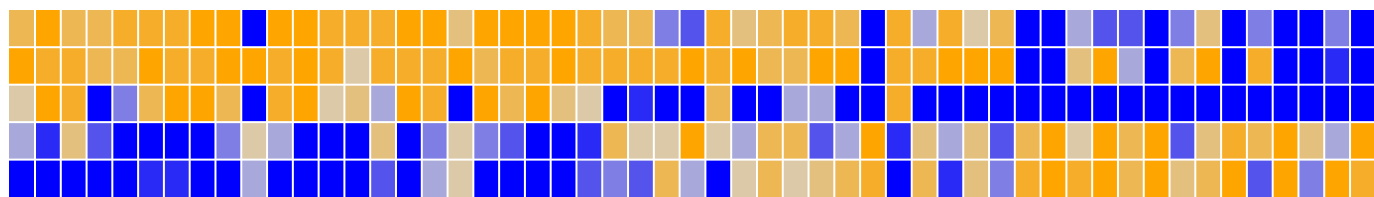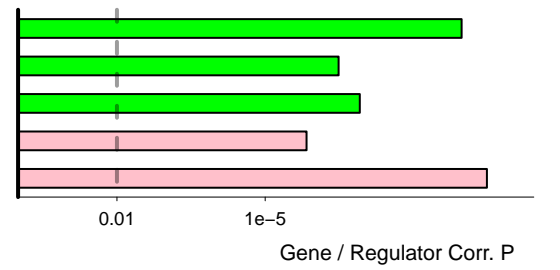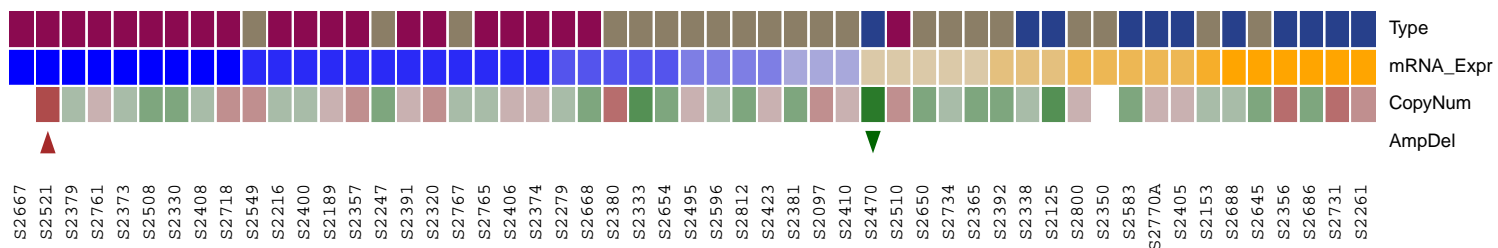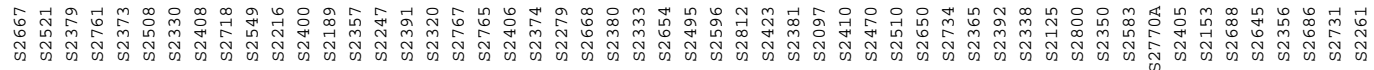

# TPBG

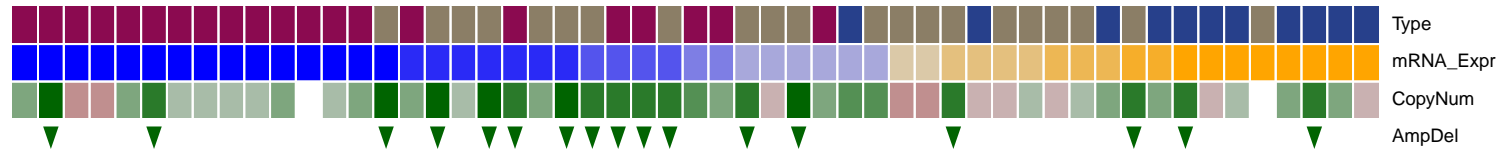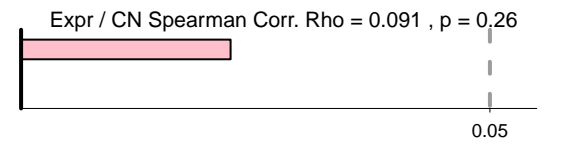

- 6 : 83071433
- 6 : 83072400
- 6 : 83072522
- 6 : 83072747
- 6 : 83072768
- 6 : 83072774
- 6 : 83072781
- 6 : 83073156
- 6 : 83073186
- 6 : 83073335
- 6 : 83073619
- 6 : 83073819
- 6 : 83073863
- 6 : 83073924
- 6 : 83073954
- 6 : 83073964
- 6 : 83074533
- 6 : 83074812
- 6 : 83075080
- 6 : 83075187
- 6 : 83076311

GeneLoc  
 PromoterAssoc  
 CpGIsland

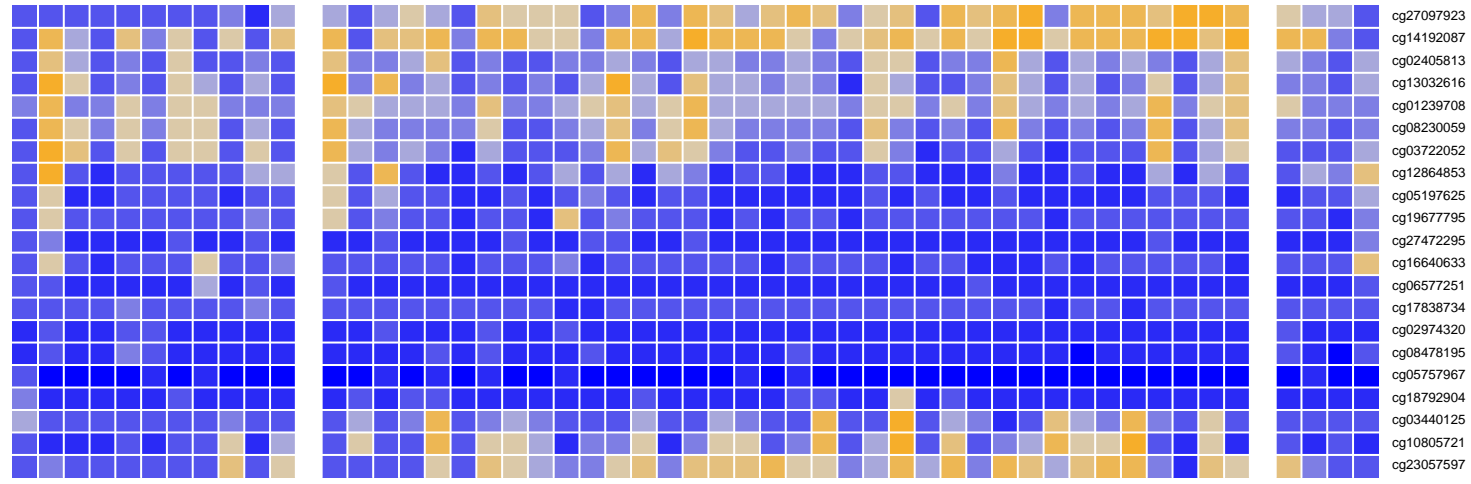

- cg27097923
- cg14192087
- cg02405813
- cg13032616
- cg01239708
- cg08230059
- cg03722052
- cg12864853
- cg05197625
- cg19677795
- cg27472295
- cg16640633
- cg06577251
- cg17838734
- cg02974320
- cg08478195
- cg05757967
- cg18792904
- cg03440125
- cg10805721
- cg23057597

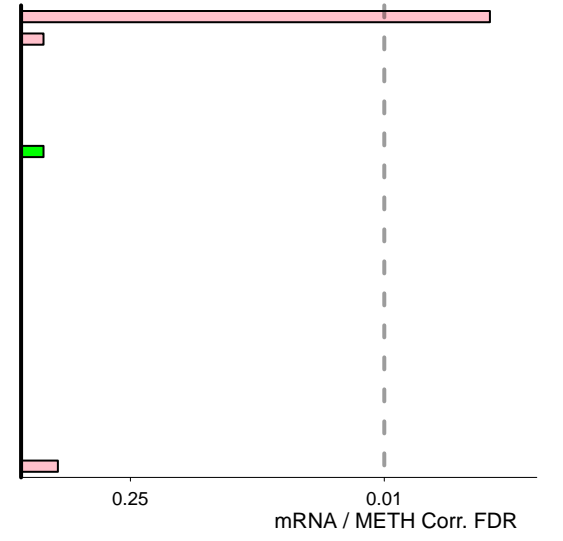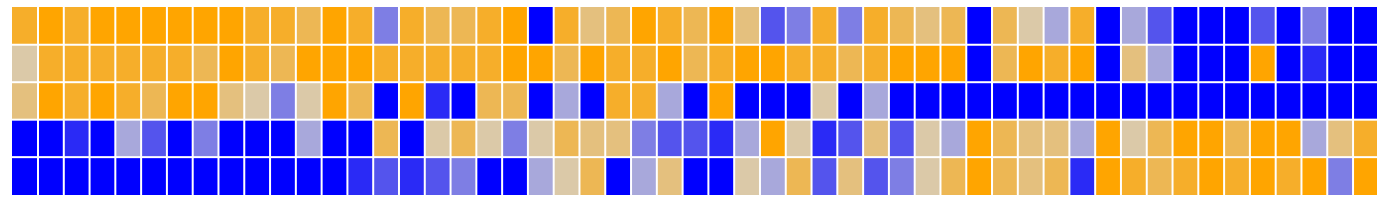

- MITF
- SOX10
- TRPM1
- ZEB1
- AXL

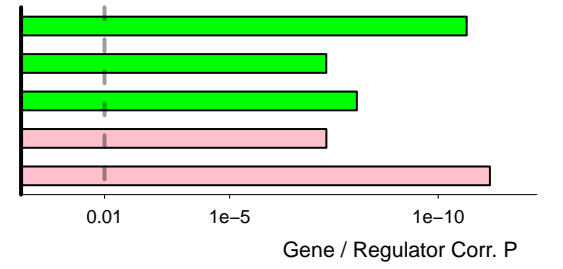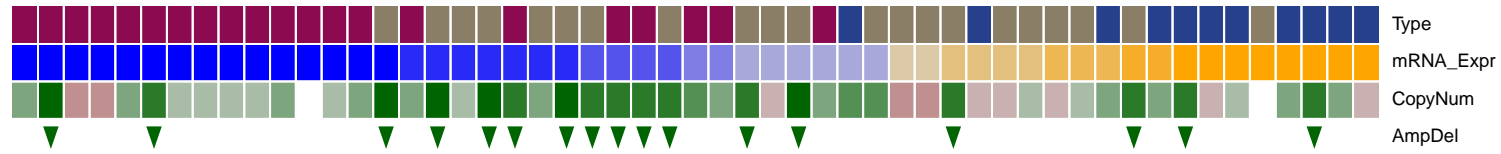

- S2357
- S2391
- S2510
- S2374
- S2216
- S2406
- S2408
- S2765
- S2279
- S2189
- S2373
- S2667
- S2400
- S2508
- S2645
- S2330
- S2333
- S2380
- S2596
- S2718
- S2549
- S2381
- S2153
- S2379
- S2320
- S2097
- S2761
- S2521
- S2812
- S2495
- S2654
- S2668
- S2405
- S2247
- S2392
- S2767
- S2410
- S2125
- S2423
- S2365
- S2650
- S2734
- S2356
- S2800
- S2583
- S2470
- S2770A
- S2338
- S2350
- S2261
- S2731
- S2686
- S2688

# CDH13

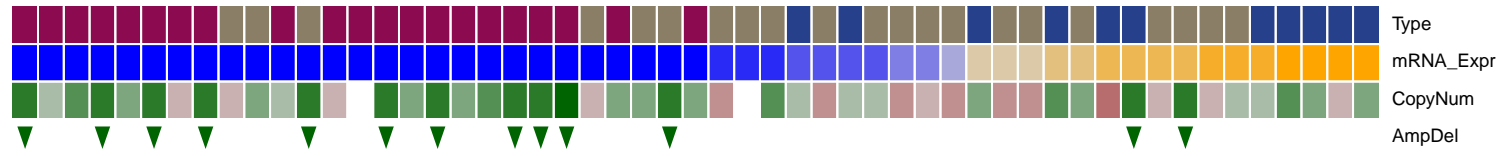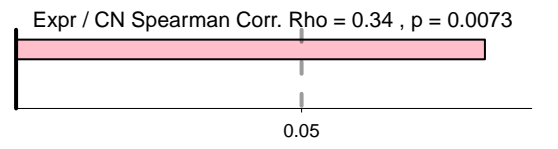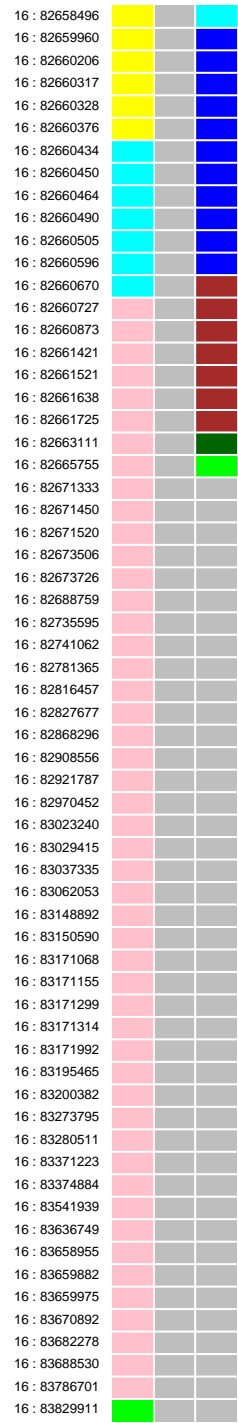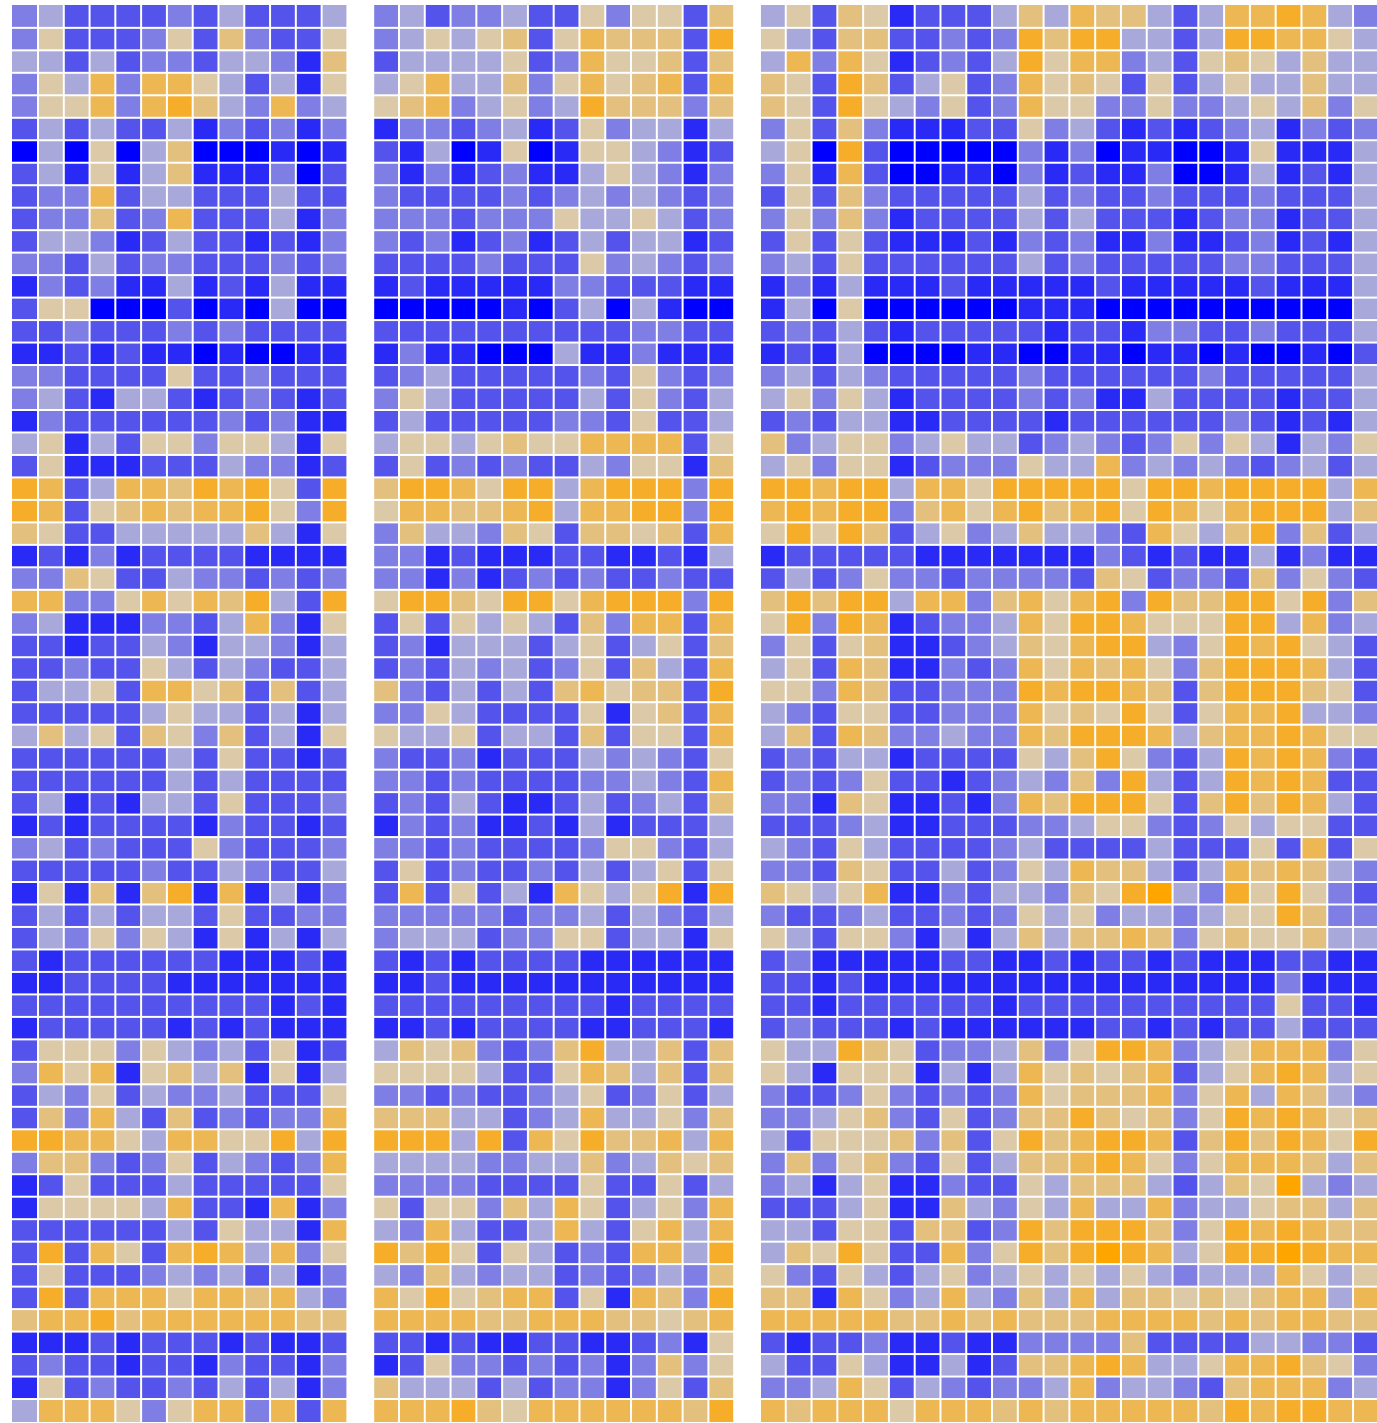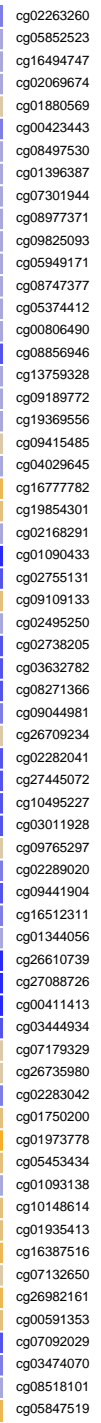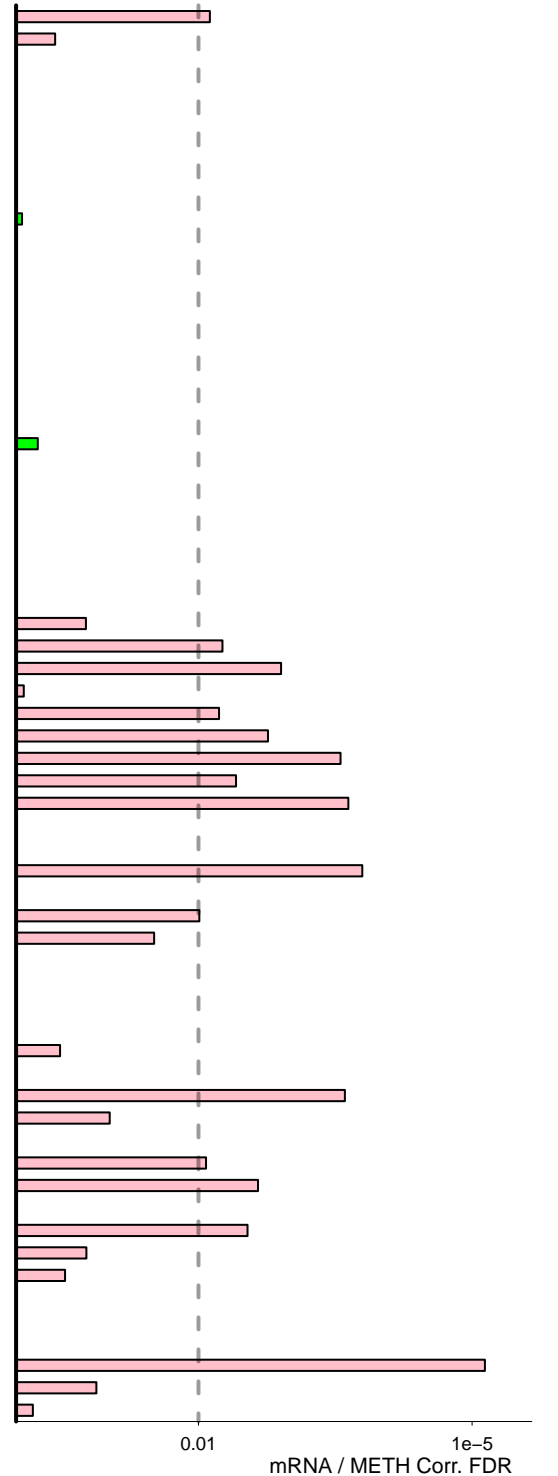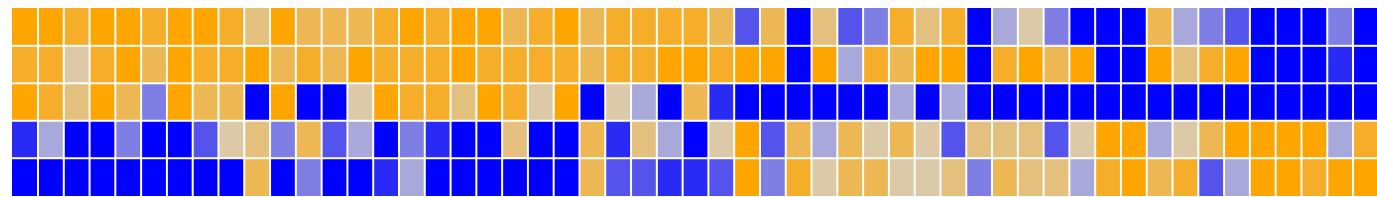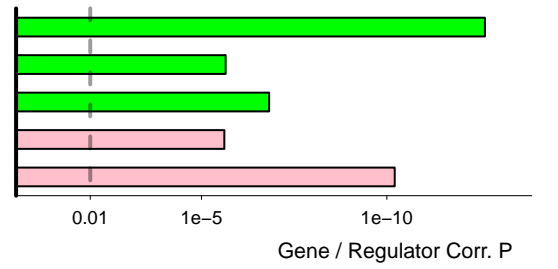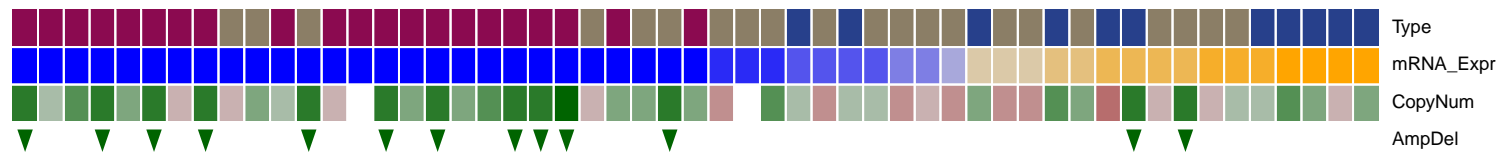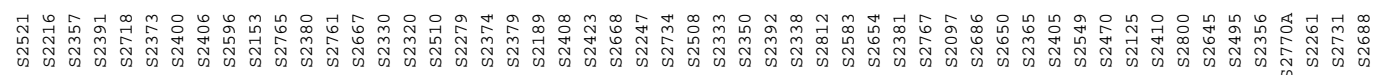

# RAB27B

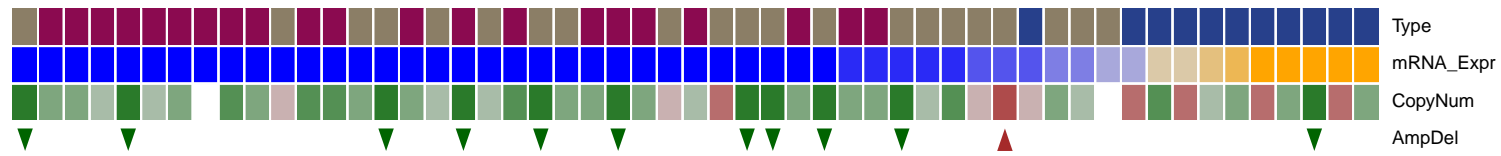

18 : 52491783  
 18 : 52495404  
 18 : 52495541  
 18 : 52495605  
 18 : 52495633  
 18 : 52495740  
 18 : 52495744  
 18 : 52495760  
 18 : 52495796  
 18 : 52495981  
 18 : 52496070  
 18 : 52499934  
 18 : 52534107  
 18 : 52550263

GenLoc  
 PromoterAssoc  
 CpGIsland

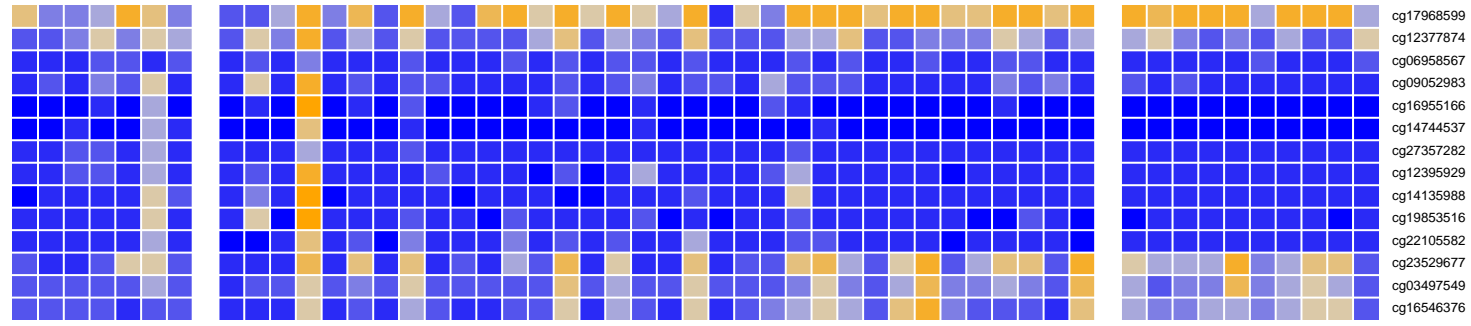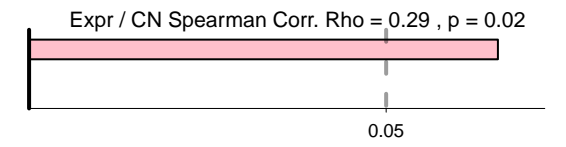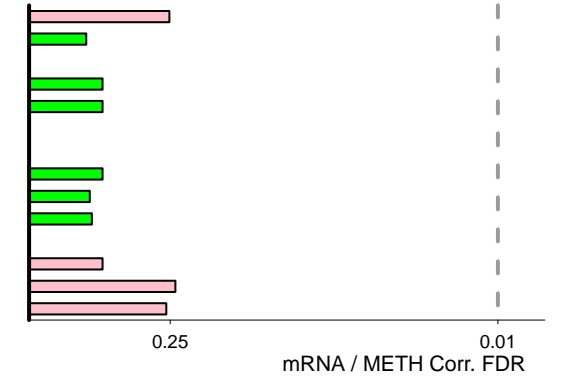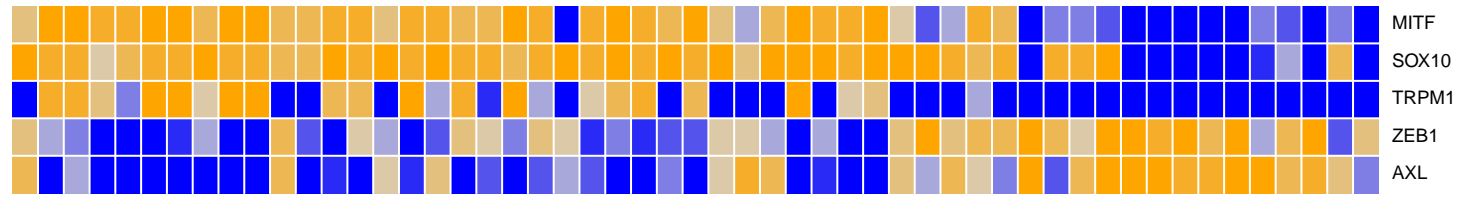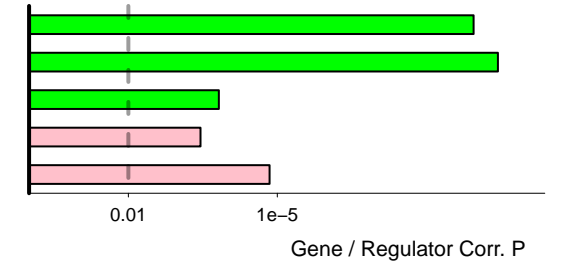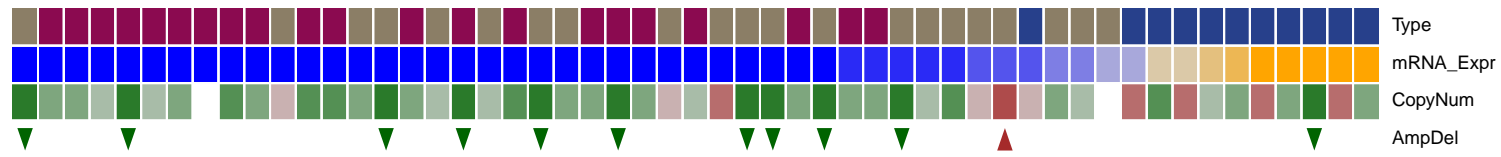

S2153  
 S2216  
 S2320  
 S2357  
 S2373  
 S2391  
 S2521  
 S2667  
 S2374  
 S2408  
 S2423  
 S2761  
 S2508  
 S2596  
 S2812  
 S2330  
 S2097  
 S2379  
 S2333  
 S2765  
 S2247  
 S2549  
 S2668  
 S2718  
 S2510  
 S2392  
 S2406  
 S2767  
 S2800  
 S2410  
 S2400  
 S2734  
 S2189  
 S2279  
 S2365  
 S2495  
 S2650  
 S2381  
 S2380  
 S2770A  
 S2645  
 S2654  
 S2350  
 S2125  
 S2688  
 S2261  
 S2338  
 S2356  
 S2731  
 S2583  
 S2470  
 S2405  
 S2686

Type  
 mRNA\_Expr  
 CopyNum  
 AmpDel

# VEGFC

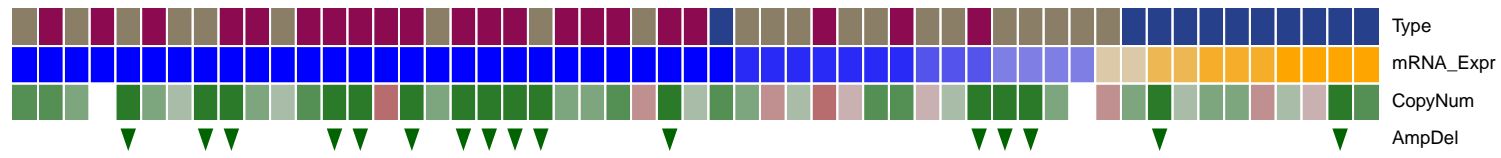

4:177715040  
4:177714456  
4:177714373  
4:177714350  
4:177713813  
4:177713423  
4:177713244  
4:177713180  
4:177673704  
4:177654753  
4:177648950  
4:177640279  
4:177630793

GeneLoc  
PromoterAssoc  
CpGIsland

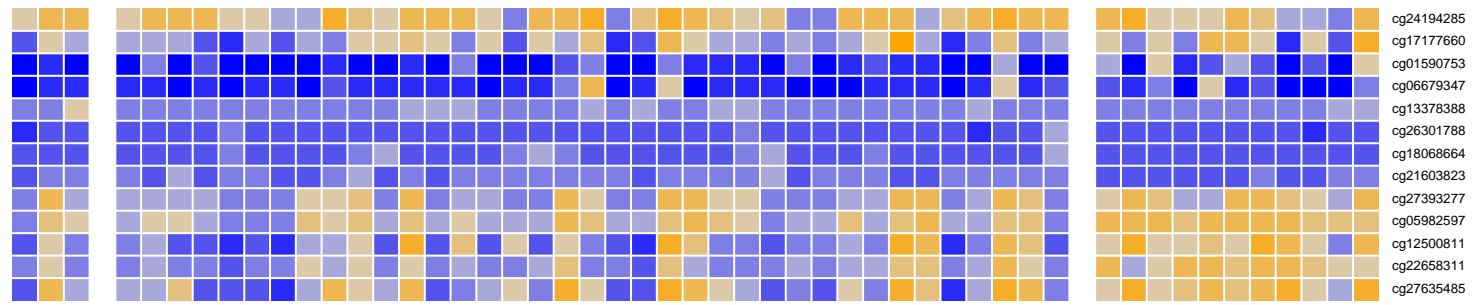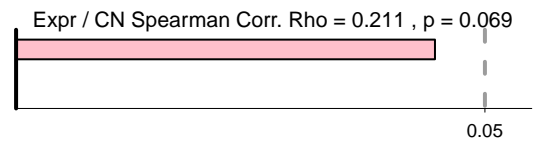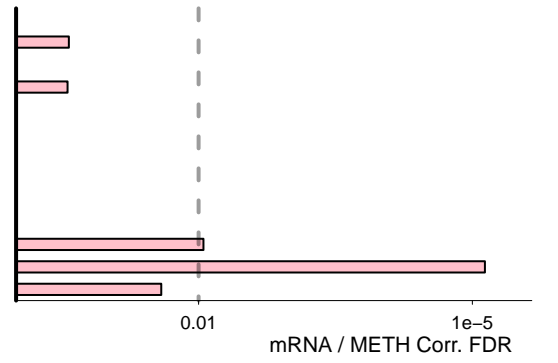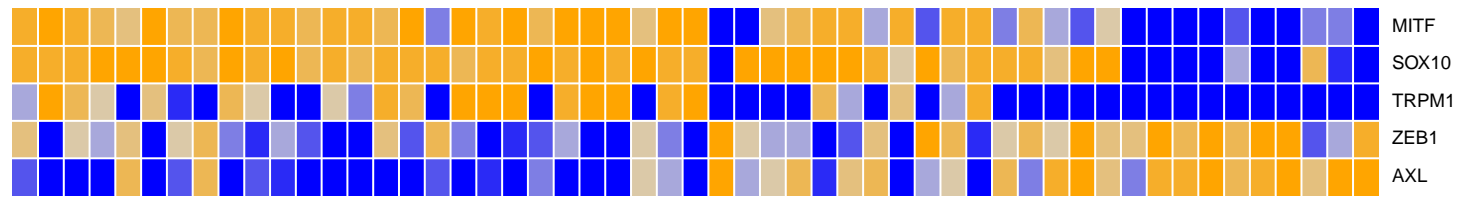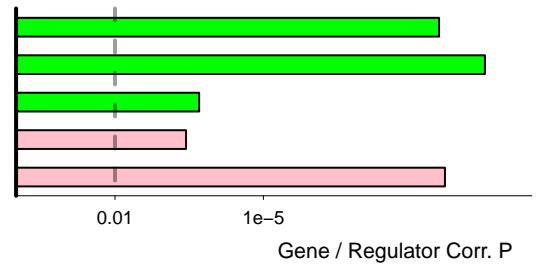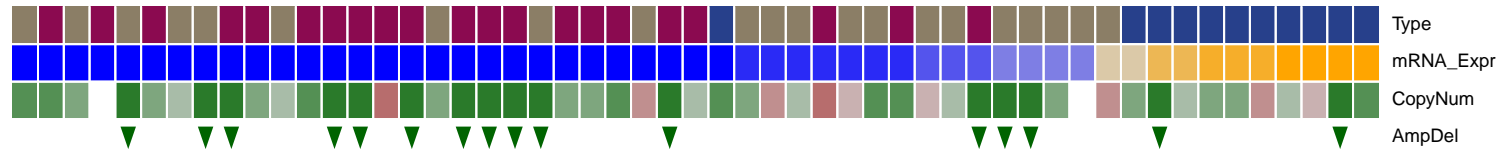

S2247  
S2391  
S2596  
S2667  
S2153  
S2279  
S2333  
S2423  
S2718  
S2668  
S2734  
S2761  
S2189  
S2373  
S2379  
S2406  
S2645  
S2765  
S2330  
S2521  
S2392  
S2216  
S2400  
S2374  
S2767  
S2320  
S2408  
S2770A  
S2549  
S2812  
S2410  
S2508  
S2097  
S2650  
S2357  
S2495  
S2381  
S2510  
S2654  
S2380  
S2800  
S2350  
S2365  
S2686  
S2470  
S2338  
S2356  
S2583  
S2261  
S2125  
S2405  
S2731  
S2688

# DPYD

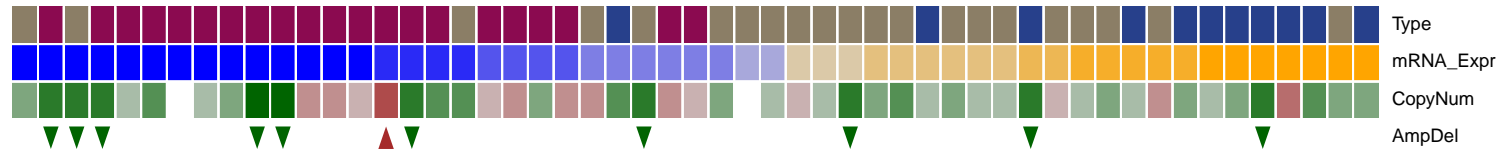

1: 98387605  
 1: 98386452  
 1: 98386435  
 1: 98386209  
 1: 98383686  
 1: 98336448  
 1: 98088314  
 1: 98036695  
 1: 98031839  
 1: 97833212  
 1: 97737509  
 1: 97706031  
 1: 97610703  
 1: 97604182  
 1: 97584888  
 1: 97565426  
 1: 97559808

GeneLoc  
 PromoterAssoc  
 CpGIsland

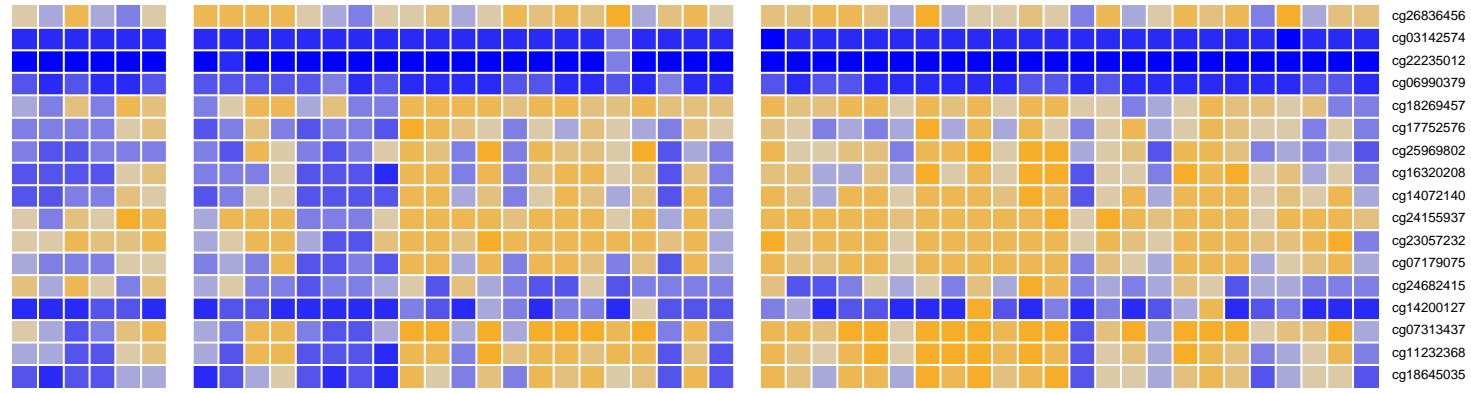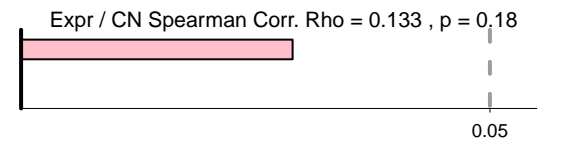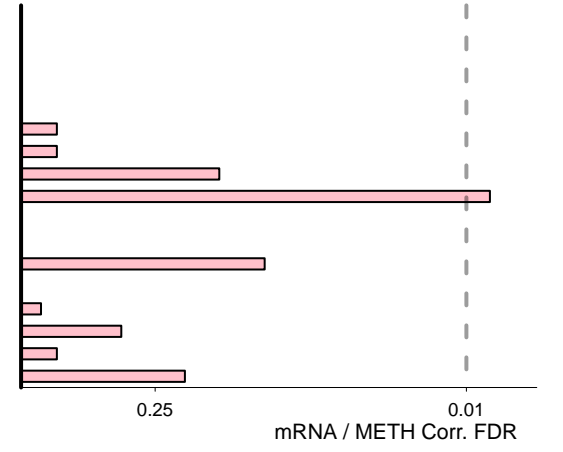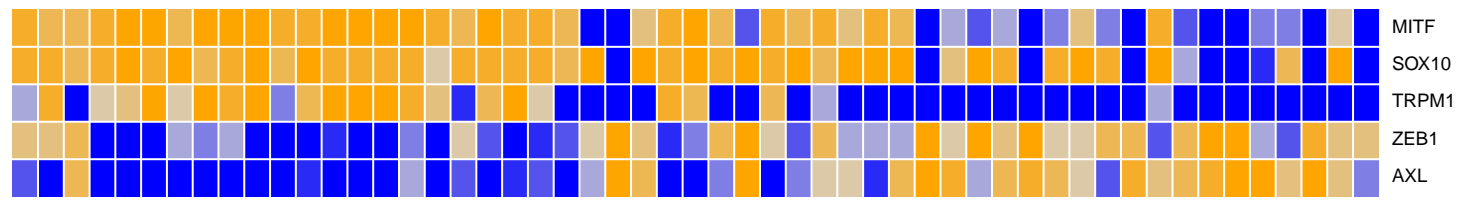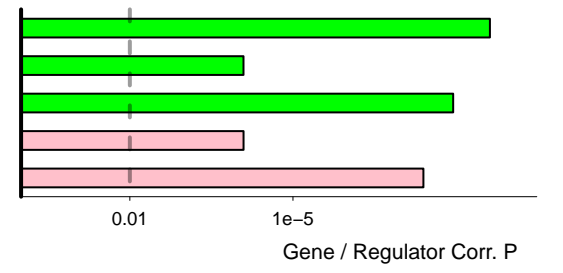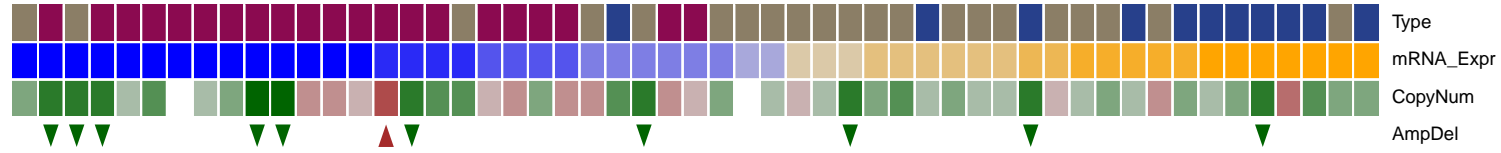

S2247  
 S2379  
 S2423  
 S2189  
 S2279  
 S2391  
 S2667  
 S2765  
 S2216  
 S2400  
 S2373  
 S2508  
 S2521  
 S2374  
 S2408  
 S2320  
 S2357  
 S2333  
 S2406  
 S2330  
 S2668  
 S2761  
 S2549  
 S2770A  
 S2153  
 S2510  
 S2718  
 S2380  
 S2350  
 S2596  
 S2392  
 S2381  
 S2812  
 S2734  
 S2410  
 S2356  
 S2800  
 S2495  
 S2650  
 S2470  
 S2654  
 S2767  
 S2645  
 S2338  
 S2097  
 S2583  
 S2261  
 S2125  
 S2731  
 S2405  
 S2688  
 S2365  
 S2686

# THSD4

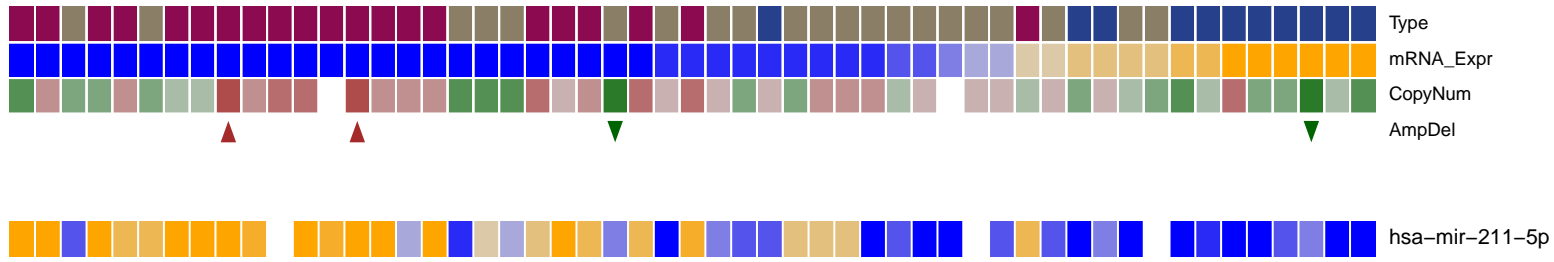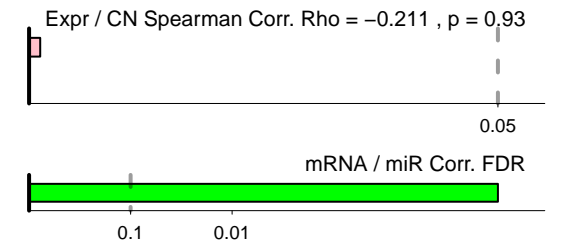

- 15: 71398102
- 15: 71401960
- 15: 71402902
- 15: 71404101
- 15: 71406783
- 15: 71407484
- 15: 71408291
- 15: 71408603
- 15: 71408776
- 15: 71408847
- 15: 71408914
- 15: 71409751
- 15: 71409997
- 15: 71410605
- 15: 71414463
- 15: 71417947
- 15: 71428996
- 15: 71432294
- 15: 71433358
- 15: 71433547
- 15: 71433723
- 15: 71444937
- 15: 71479333
- 15: 71491485
- 15: 71492746
- 15: 71495324
- 15: 71496545
- 15: 71504159
- 15: 71506968
- 15: 71507071
- 15: 71507300
- 15: 71507696
- 15: 71507895
- 15: 71509120
- 15: 71509548
- 15: 71512712
- 15: 71519190
- 15: 71520142
- 15: 71532066
- 15: 71544038
- 15: 71545664
- 15: 71554492
- 15: 71573101
- 15: 71573997
- 15: 71581059
- 15: 71586893
- 15: 71595576
- 15: 71606395
- 15: 71608715
- 15: 71616585
- 15: 71623290
- 15: 71624510
- 15: 71627379
- 15: 71632208
- 15: 71630714
- 15: 71641850
- 15: 71646079
- 15: 71649307
- 15: 71657141
- 15: 71667720
- 15: 71677955
- 15: 71679485
- 15: 71683553
- 15: 71691967
- 15: 71704440
- 15: 71717382
- 15: 71736038
- 15: 71738168
- 15: 71740833
- 15: 71747687
- 15: 71776870
- 15: 71787471
- 15: 71800893
- 15: 71804736
- 15: 71807797
- 15: 71818628
- 15: 71840098
- 15: 71854836
- 15: 71860066
- 15: 71903974
- 15: 71921678
- 15: 71968614
- 15: 71994487
- 15: 72009031
- 15: 72020580
- 15: 72020908
- 15: 72022092
- 15: 72039838
- 15: 72045301
- 15: 72071616
- 15: 72072813
- 15: 72073485

GeneLoc  
PromoterAssoc  
CpGIsland

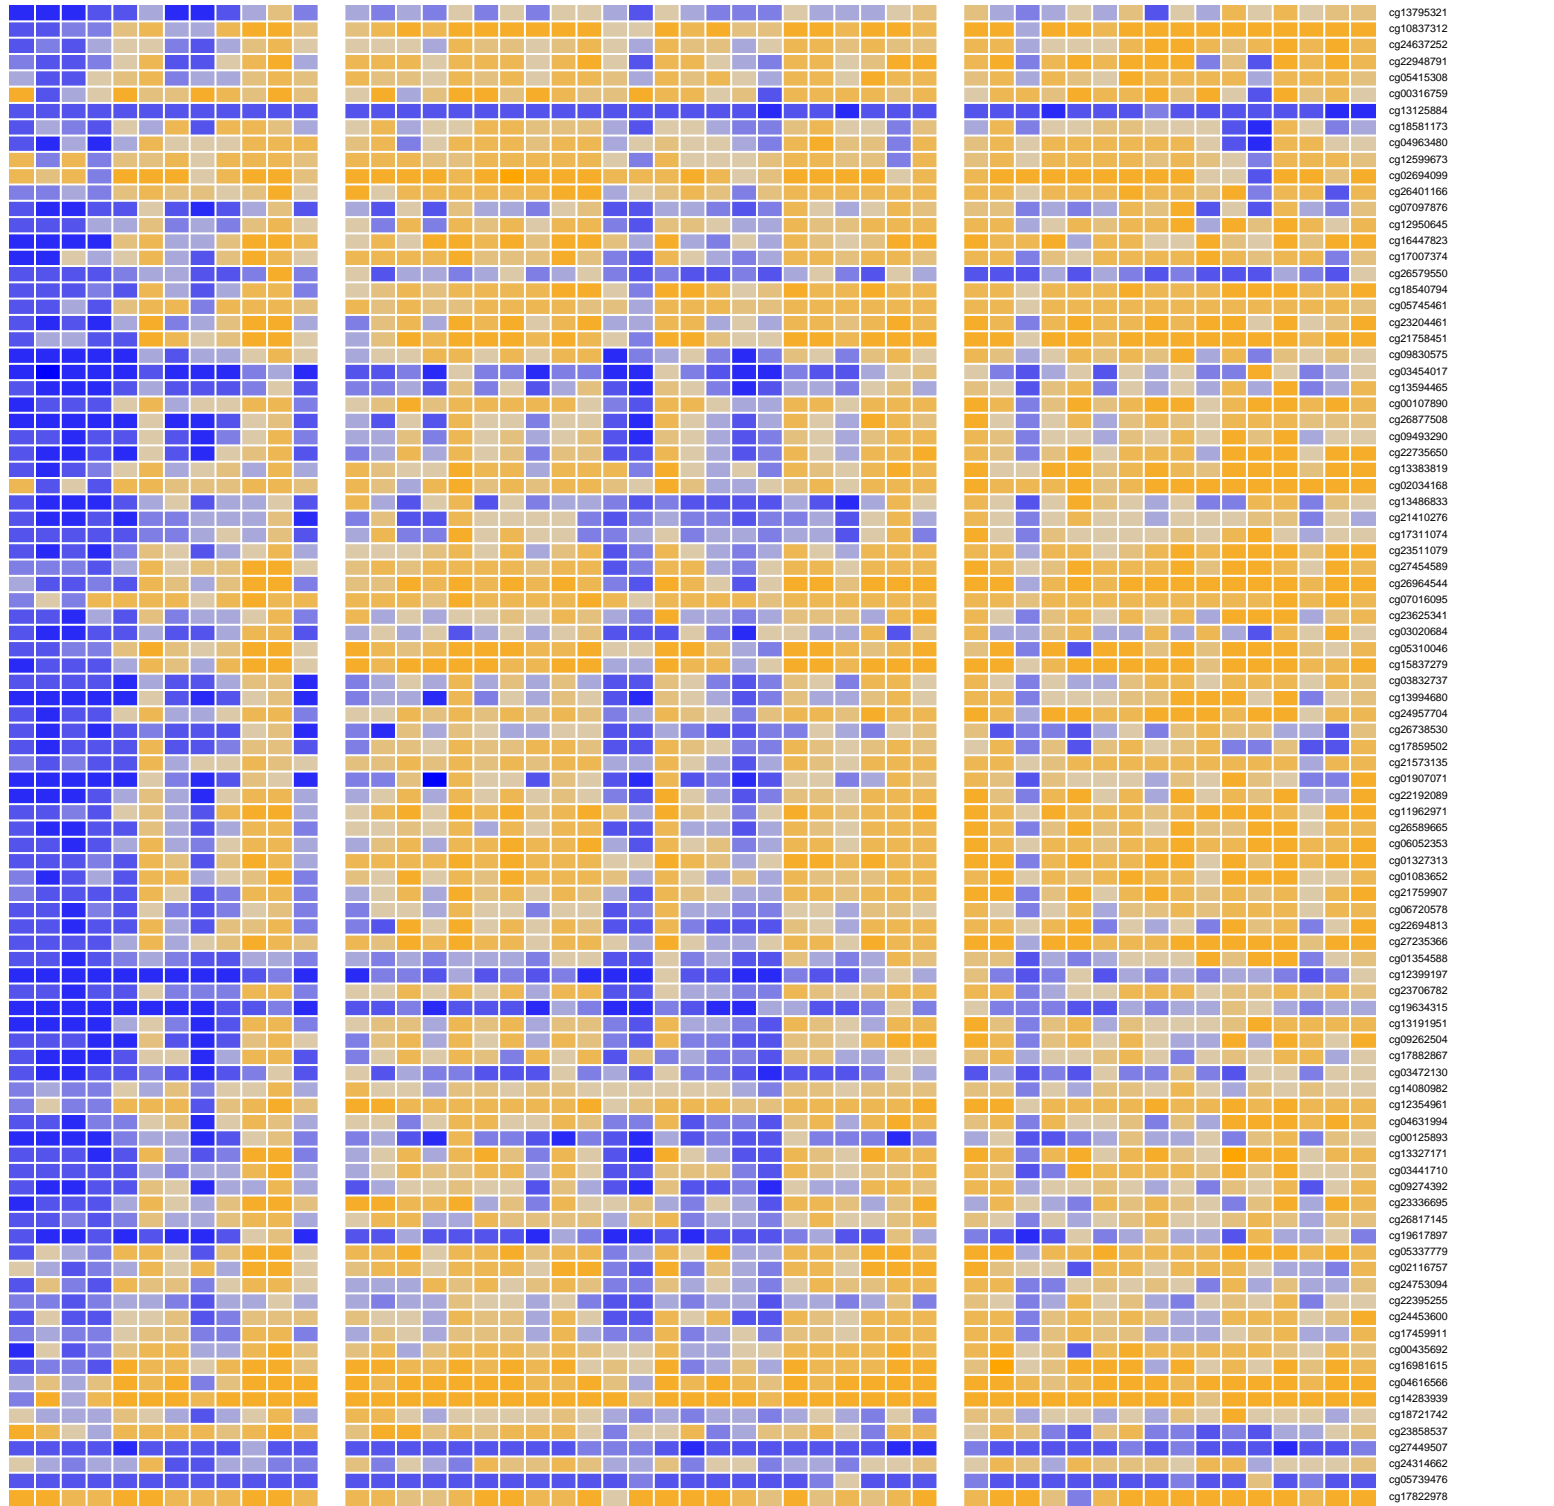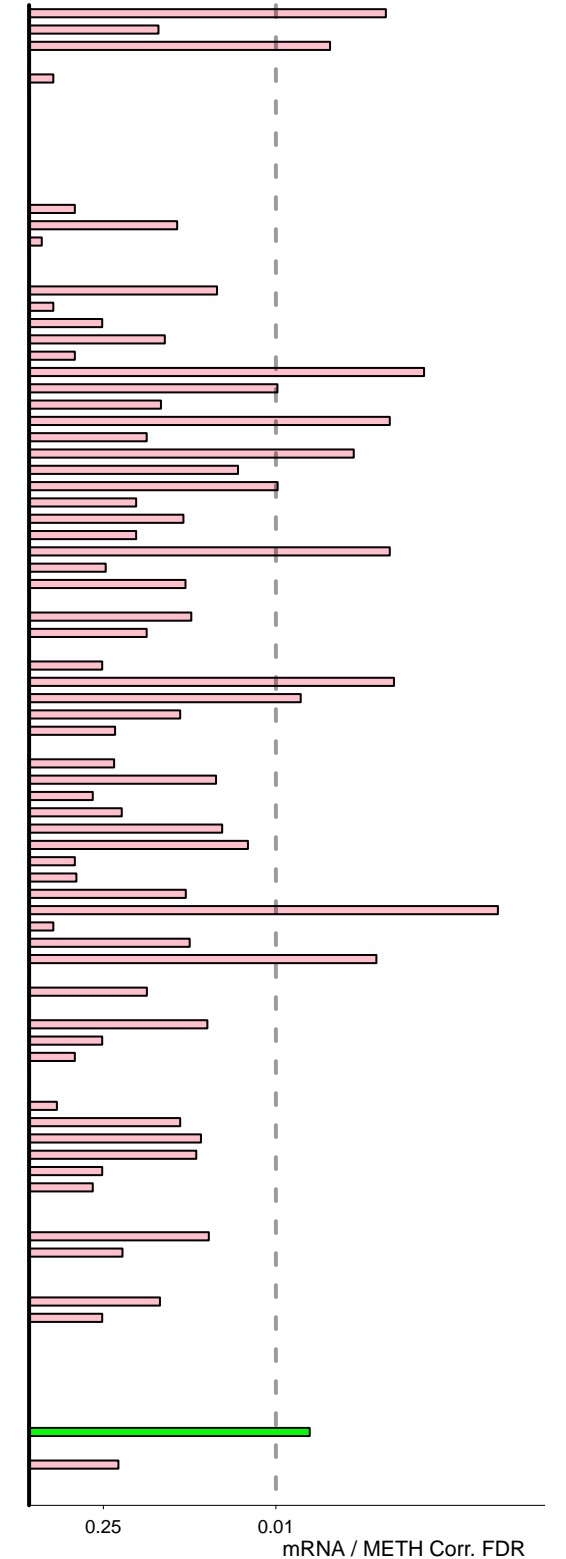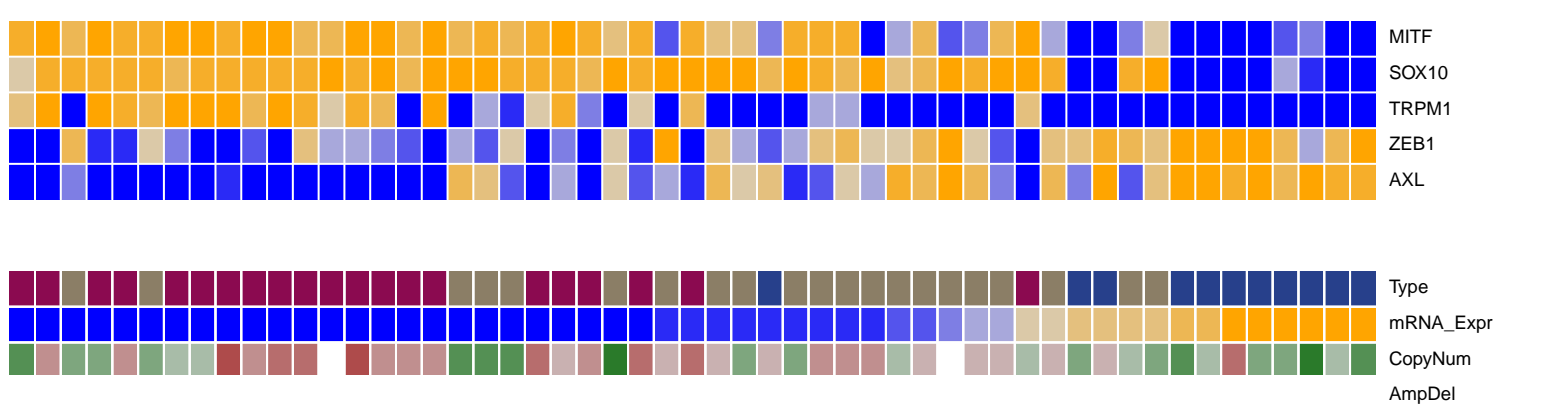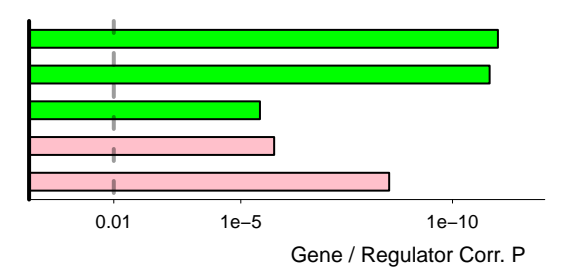

- S2357
- S2374
- S2380
- S2521
- S2510
- S2596
- S2765
- S2408
- S2330
- S2406
- S2391
- S2379
- S2667
- S2216
- S2718
- S2761
- S2400
- S2410
- S2097
- S2333
- S2189
- S2320
- S2373
- S2767
- S2668
- S2495
- S2508
- S2153
- S2812
- S2405
- S2734
- S2247
- S2381
- S2549
- S2800
- S2423
- S2350
- S2654
- S2392
- S2279
- S2650
- S2686
- S2645
- S2365
- S2770A
- S2356
- S2470
- S2125
- S2583
- S2731
- S2338
- S2261

# COL6A2

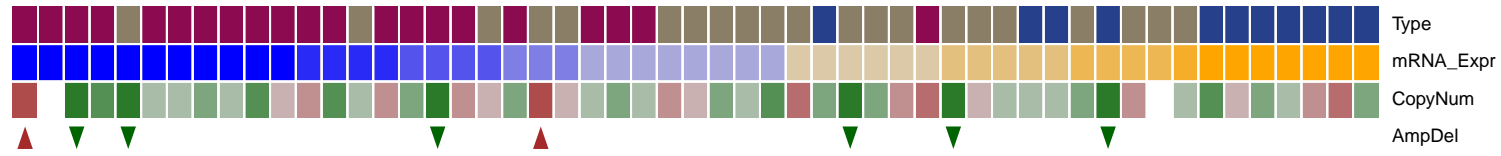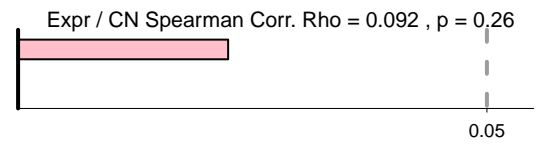

21 : 47517484  
 21 : 47518068  
 21 : 47518747  
 21 : 47518998  
 21 : 47519444  
 21 : 47521576  
 21 : 47529764  
 21 : 47530705  
 21 : 47530767  
 21 : 47531945  
 21 : 47532167  
 21 : 47532333  
 21 : 47532820  
 21 : 47533197  
 21 : 47536647  
 21 : 47541643  
 21 : 47544366  
 21 : 47545200  
 21 : 47545588  
 21 : 47545624  
 21 : 47546030  
 21 : 47546211  
 21 : 47547796  
 21 : 47548991  
 21 : 47549369  
 21 : 47549635  
 21 : 47551108  
 21 : 47551220  
 21 : 47551987  
 21 : 47552084  
 21 : 47552112  
 21 : 47552343  
 21 : 47552628

GeneLoc  
 PromoterAssoc  
 CpGIsland

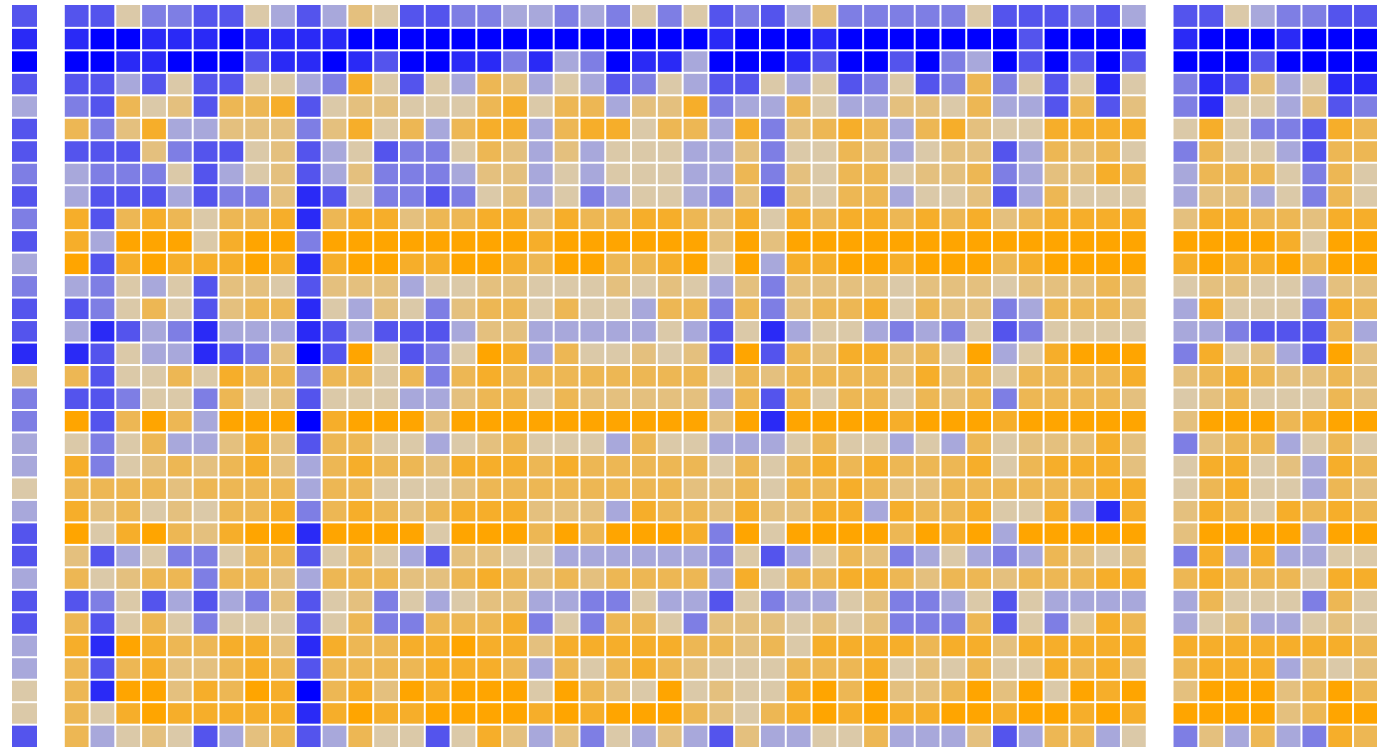

cg10099638  
 cg16099707  
 cg10435849  
 cg24784350  
 cg18322321  
 cg21274607  
 cg04841121  
 cg14960373  
 cg00375581  
 cg24389599  
 cg15961716  
 cg15087129  
 cg05128498  
 cg13588826  
 cg10811880  
 cg12423553  
 cg05629606  
 cg11529924  
 cg24688939  
 cg12329404  
 cg00929658  
 cg03214640  
 cg00159953  
 cg22247792  
 cg07780114  
 cg03694415  
 cg07544102  
 cg02740435  
 cg13902069  
 cg00674428  
 cg07008701  
 cg14075645  
 cg15636792

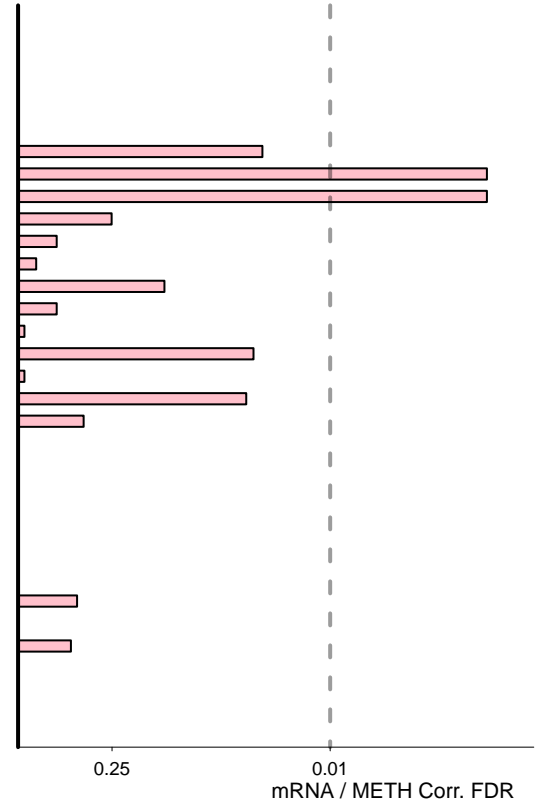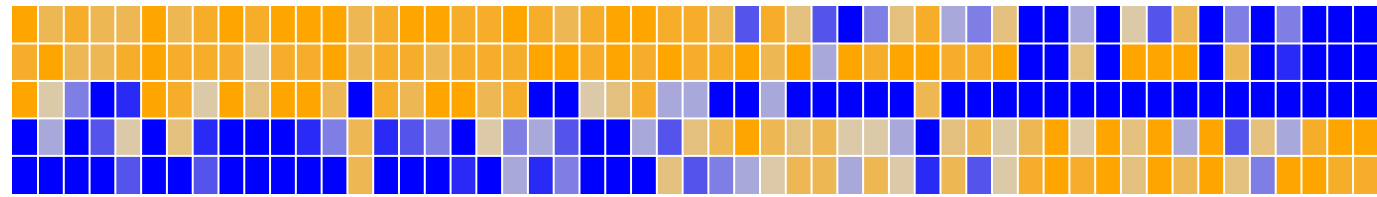

MITF  
 SOX10  
 TRPM1  
 ZEB1  
 AXL

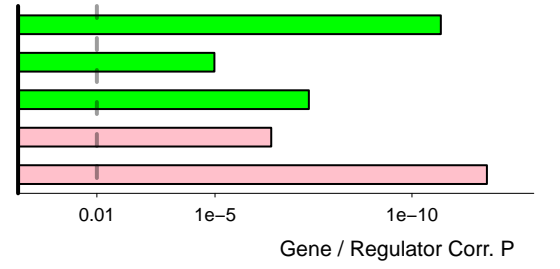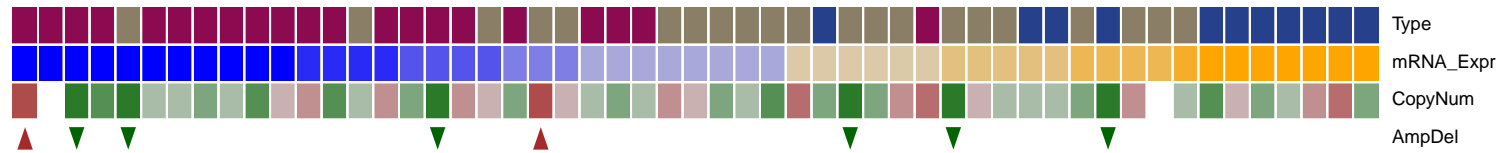

S2374  
 S2667  
 S2373  
 S2761  
 S2333  
 S2400  
 S2379  
 S2668  
 S2408  
 S2357  
 S2391  
 S2521  
 S2718  
 S2423  
 S2510  
 S2406  
 S2765  
 S2330  
 S2596  
 S2320  
 S2734  
 S2392  
 S2189  
 S2279  
 S2216  
 S2097  
 S2247  
 S2380  
 S2495  
 S2381  
 S2153  
 S2583  
 S2549  
 S2654  
 S2812  
 S2508  
 S2650  
 S2645  
 S2767  
 S2338  
 S2356  
 S2800  
 S2125  
 S2365  
 S2350  
 S2410  
 S2770A  
 S2405  
 S2686  
 S2731  
 S2688  
 S2470  
 S2261

Type  
 mRNA\_Expr  
 CopyNum  
 AmpDel



# DKK3

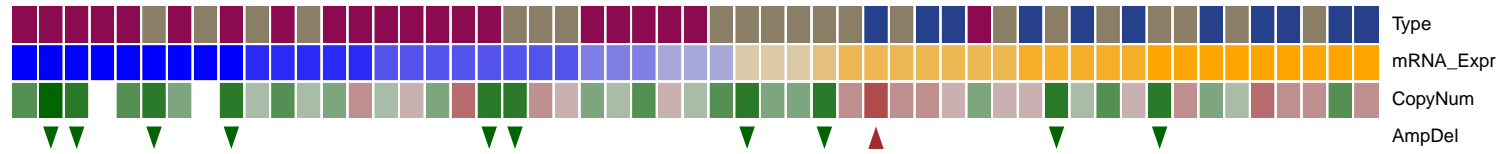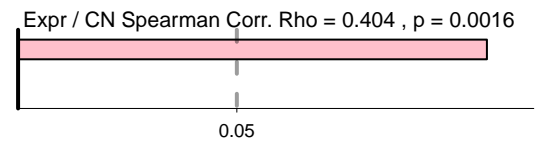

11:12033074  
11:12031508  
11:12031314  
11:12031266  
11:12031113  
11:12031099  
11:12031097  
11:12031093  
11:12031046  
11:12030914  
11:12030838  
11:12030648  
11:12030643  
11:12030639  
11:12030464  
11:12030375  
11:12030289  
11:12030278  
11:12030272  
11:12030268  
11:12030187  
11:12030088  
11:12029738  
11:12028069  
11:12026850  
11:12015695  
11:12010020  
11:12008553  
11:12003759  
11:12001622  
11:11998715  
11:11994913  
11:11984899

GeneLoc  
PromoterAssoc  
CpGIsland

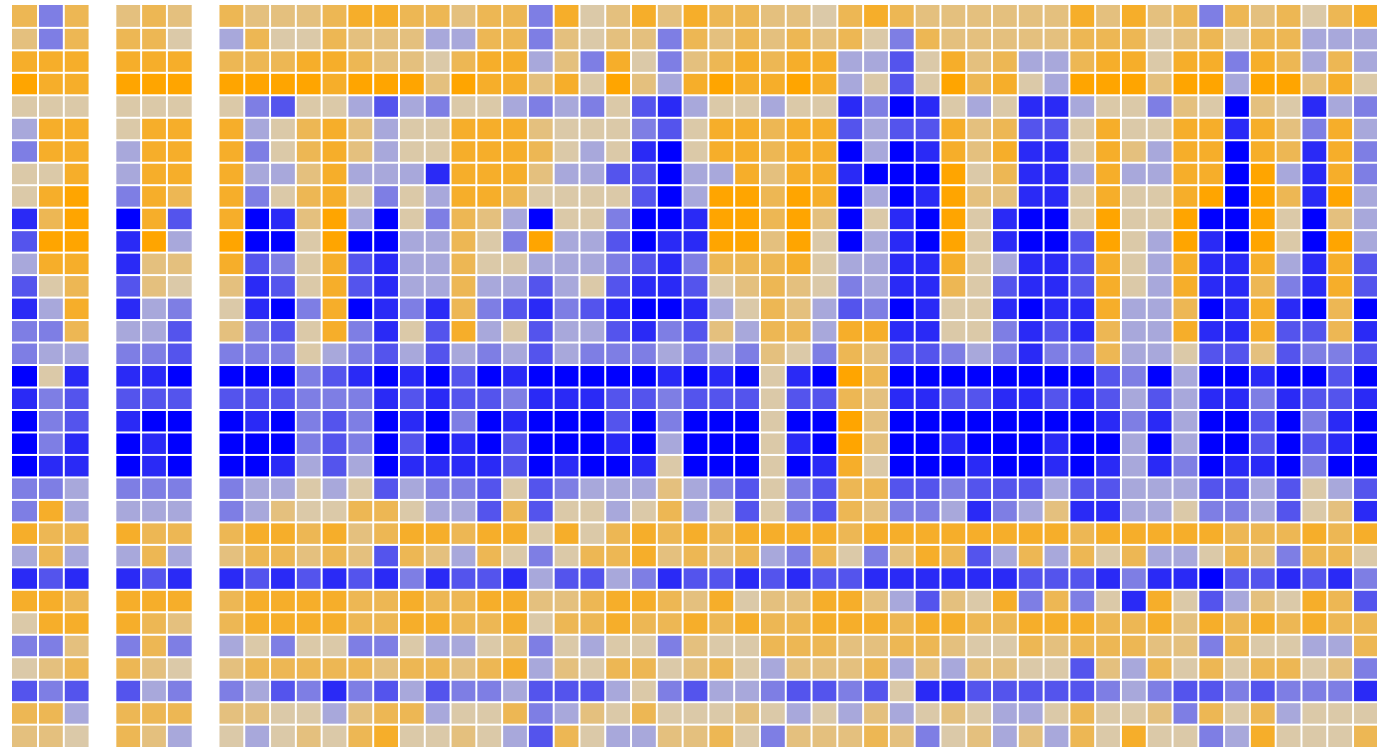

cg13569714  
cg25787984  
cg21620540  
cg04986504  
cg12668155  
cg01286655  
cg05106294  
cg08662017  
cg24543696  
cg22082397  
cg19867649  
cg18768414  
cg13216057  
cg06188670  
cg12778215  
cg13259205  
cg20973347  
cg06943667  
cg17039391  
cg04100696  
cg16915821  
cg13024368  
cg20950301  
cg19844101  
cg18138426  
cg26446832  
cg10364881  
cg25759507  
cg13332953  
cg10986946  
cg26166595  
cg23162647  
cg26235273

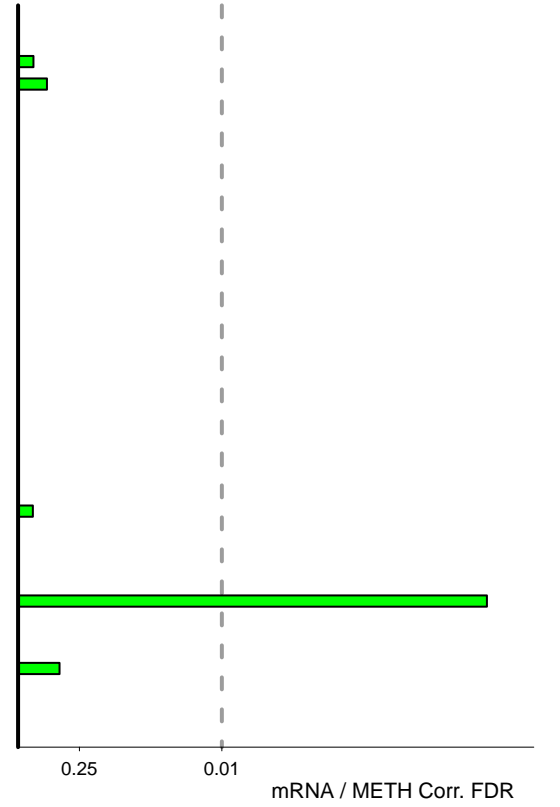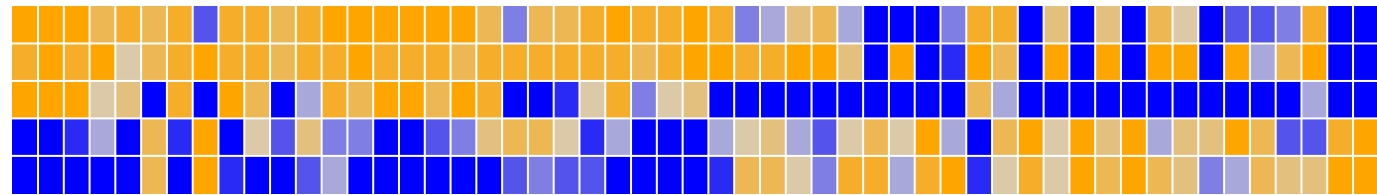

MITF  
SOX10  
TRPM1  
ZEB1  
AXL

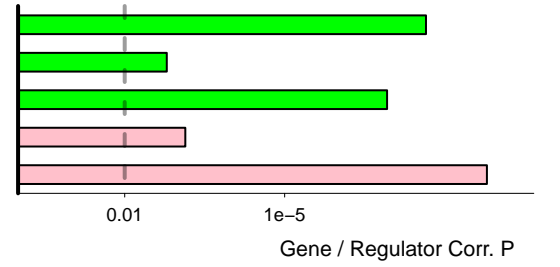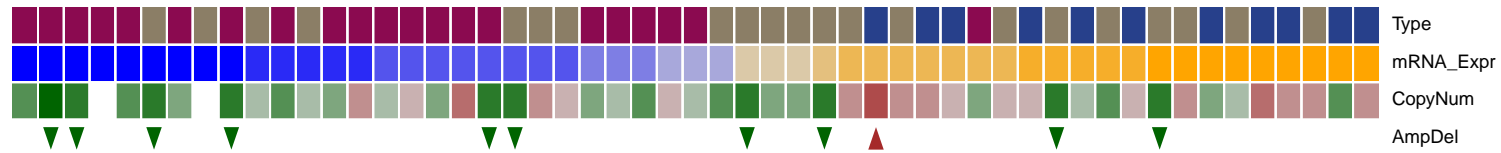

S2374  
S2400  
S2521  
S2667  
S2357  
S2423  
S2510  
S2350  
S2330  
S2596  
S2761  
S2247  
S2320  
S2718  
S2408  
S2391  
S2406  
S2765  
S2379  
S2645  
S2380  
S2333  
S2668  
S2216  
S2373  
S2189  
S2279  
S2734  
S2654  
S2650  
S2812  
S2392  
S2800  
S2338  
S2549  
S2470  
S2731  
S2508  
S2381  
S2261  
S2767  
S2356  
S2153  
S2770A  
S2410  
S2365  
S2686  
S2495  
S2583  
S2405  
S2097  
S2688  
S2125

Type  
mRNA\_Expr  
CopyNum  
AmpDel

# SOX9

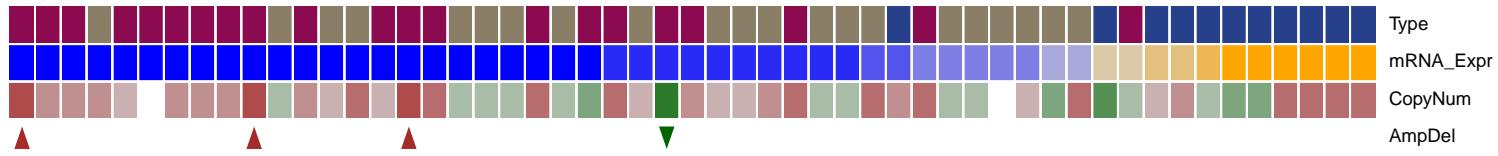

17 : 70115862  
 17 : 70115868  
 17 : 70116185  
 17 : 70116204  
 17 : 70116298  
 17 : 70116434  
 17 : 70116681  
 17 : 70118558  
 17 : 70118912  
 17 : 70119015  
 17 : 70119120  
 17 : 70119609  
 17 : 70120182  
 17 : 70120318  
 17 : 70120411  
 17 : 70120541

GeneLoc  
 PromoterAssoc  
 CpGIsland

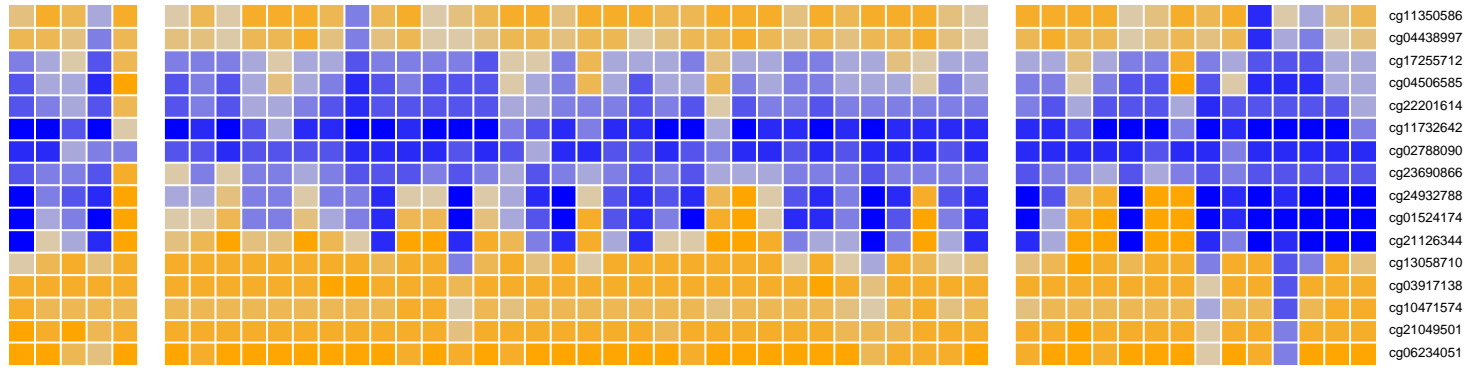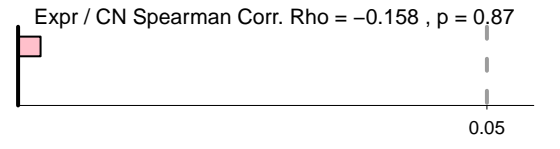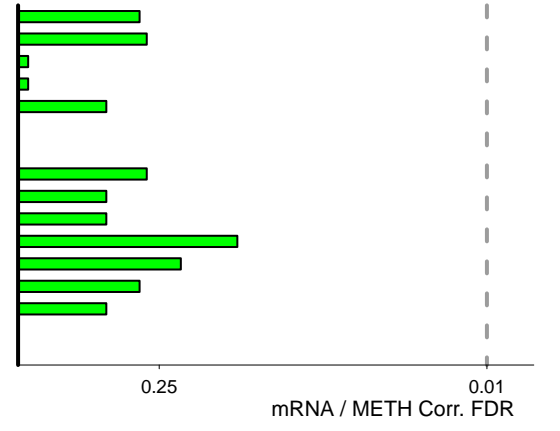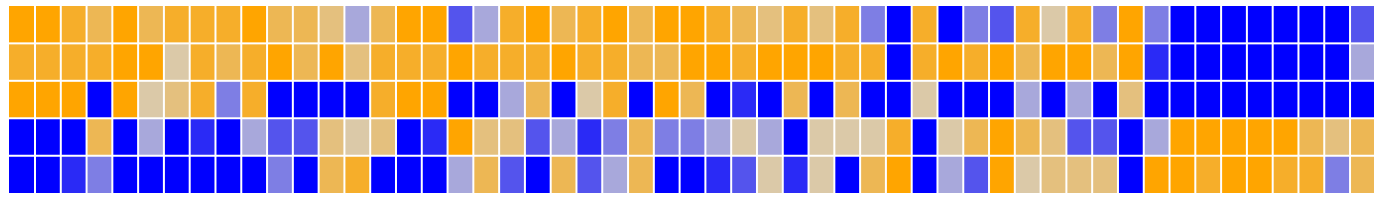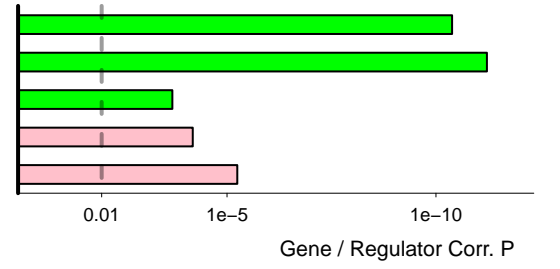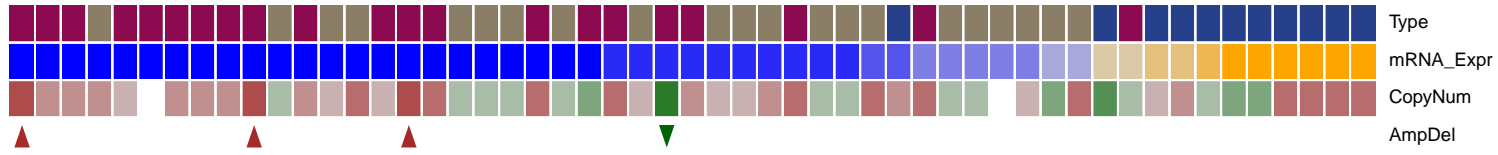

S2391  
 S2374  
 S2330  
 S2380  
 S2400  
 S2667  
 S2357  
 S2510  
 S2373  
 S2216  
 S2392  
 S2761  
 S2153  
 S2800  
 S2379  
 S2408  
 S2521  
 S2495  
 S2650  
 S2247  
 S2406  
 S2410  
 S2668  
 S2320  
 S2423  
 S2765  
 S2718  
 S2734  
 S2333  
 S2812  
 S2508  
 S2767  
 S2596  
 S2654  
 S2688  
 S2189  
 S2549  
 S2645  
 S2350  
 S2381  
 S2365  
 S2097  
 S2405  
 S2279  
 S2731  
 S2125  
 S2261  
 S2770A  
 S2356  
 S2470  
 S2338  
 S2686  
 S2583

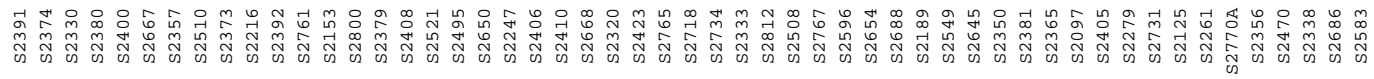

# PDGFC

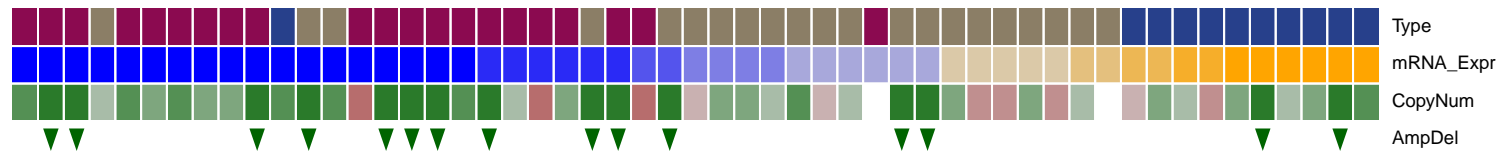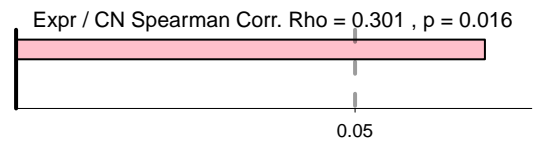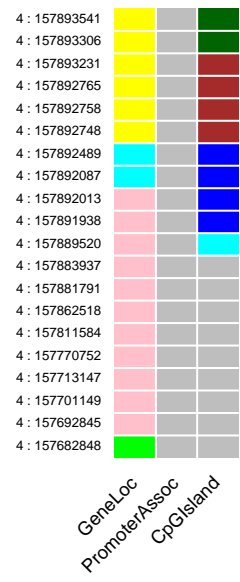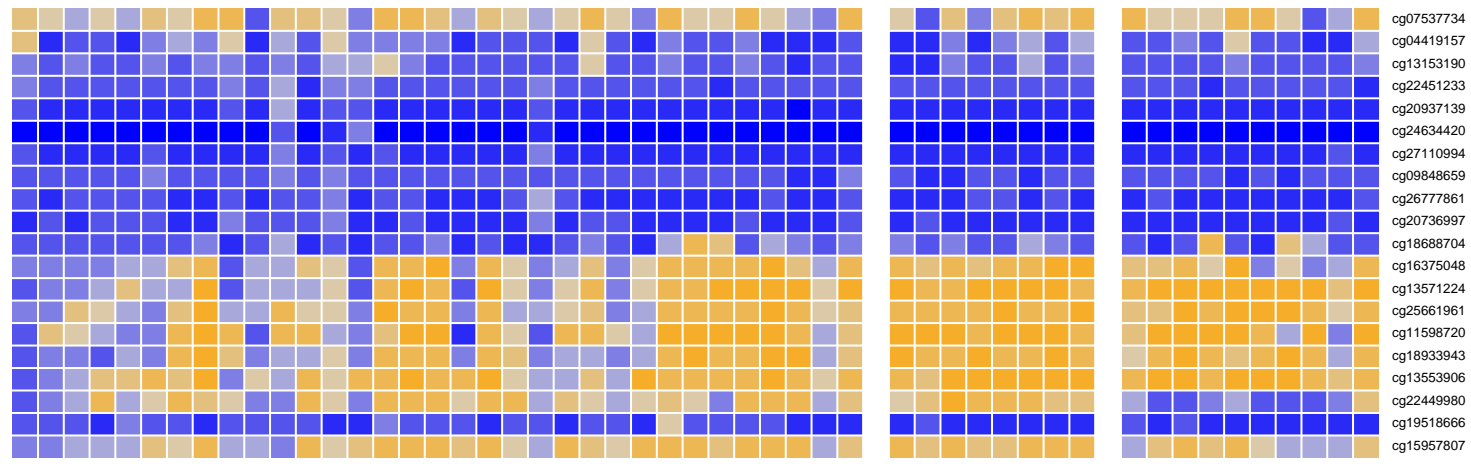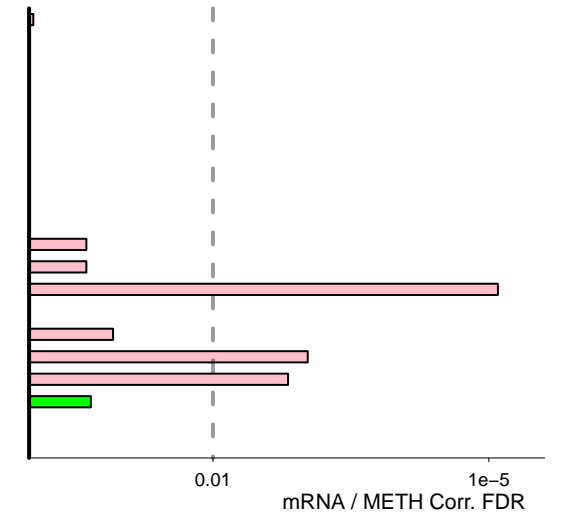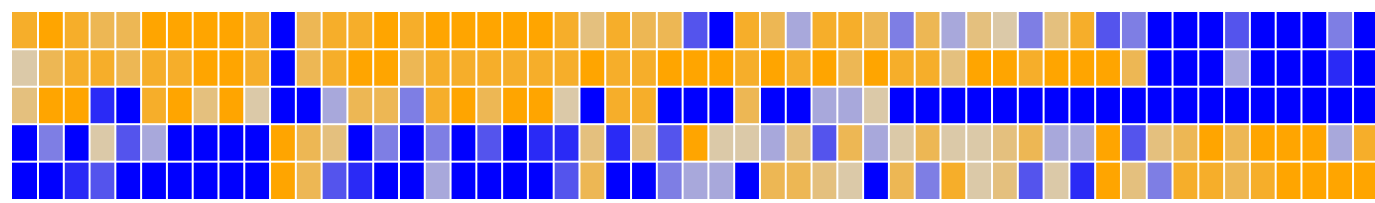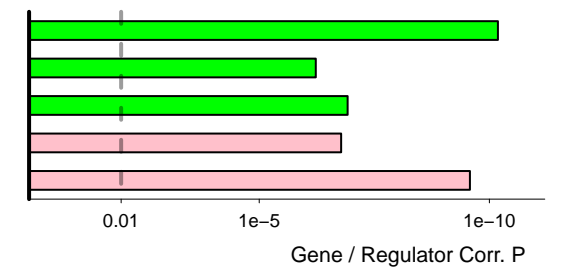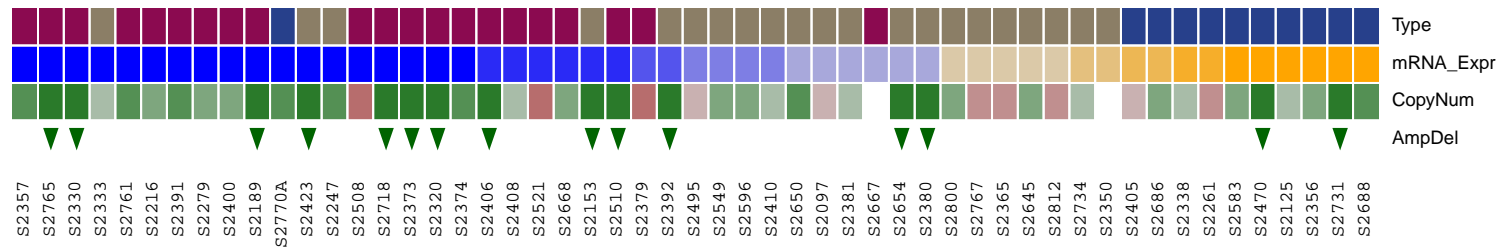

# HECW2

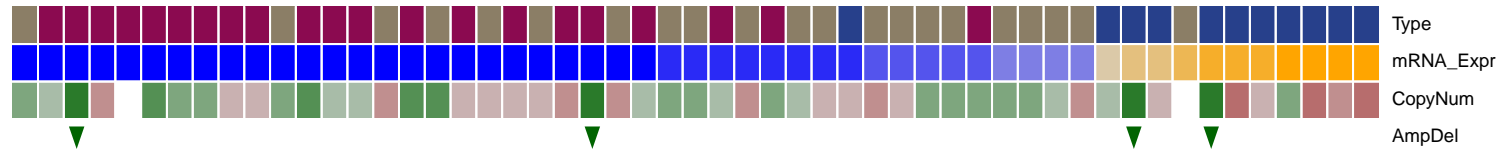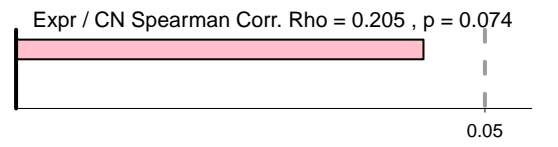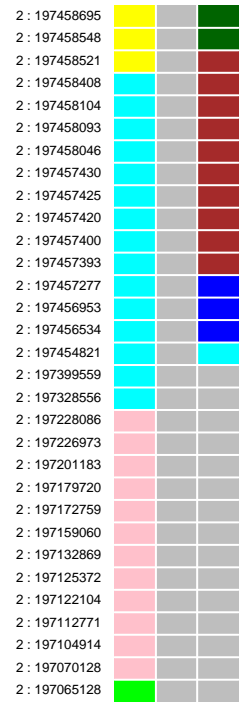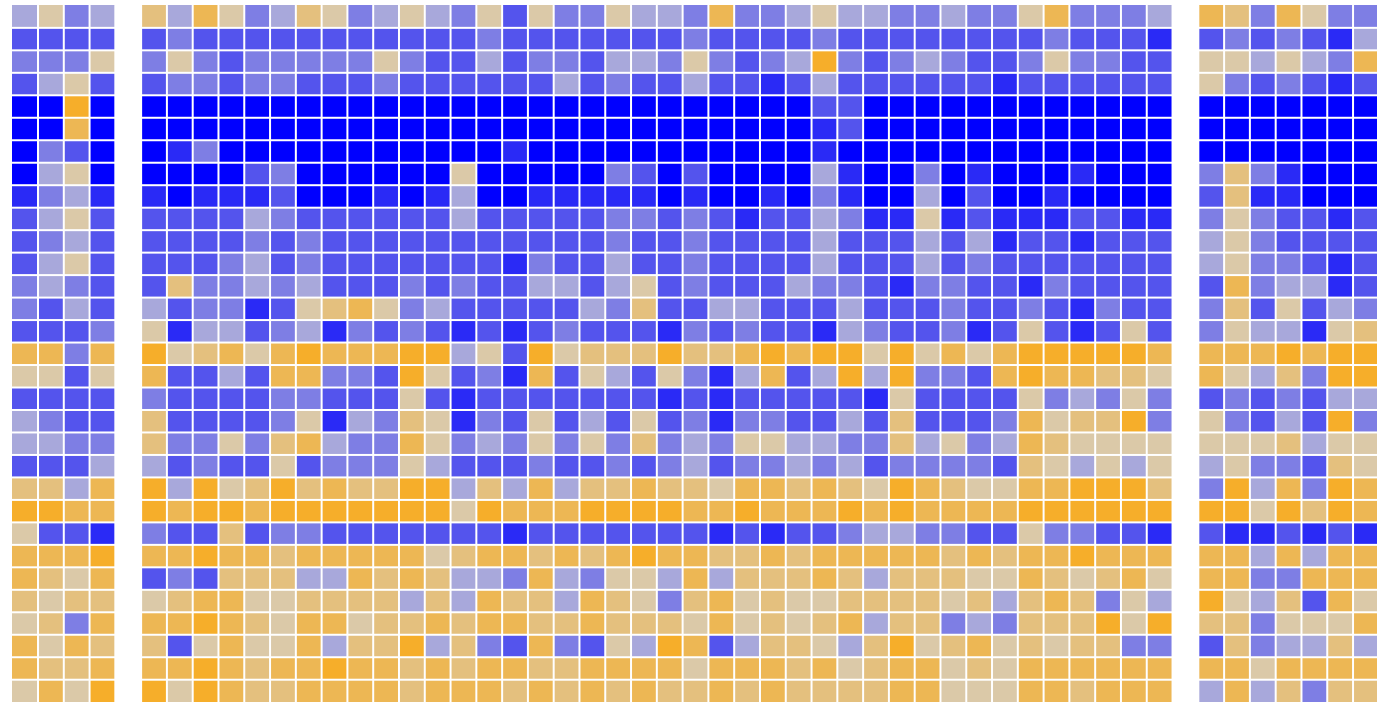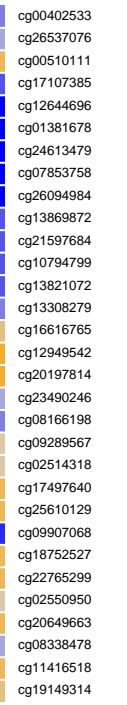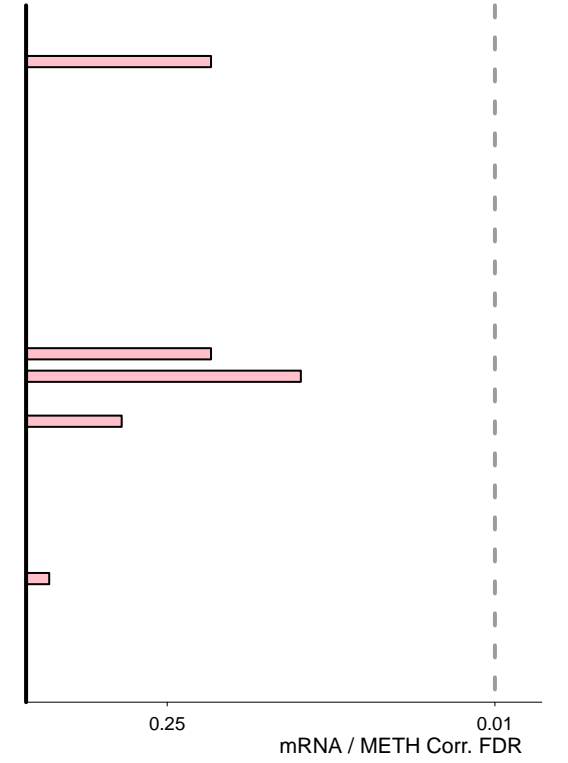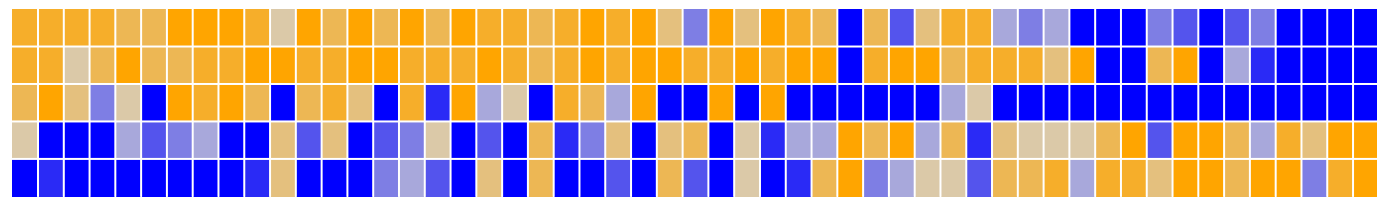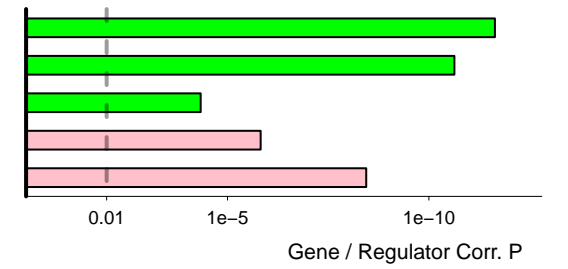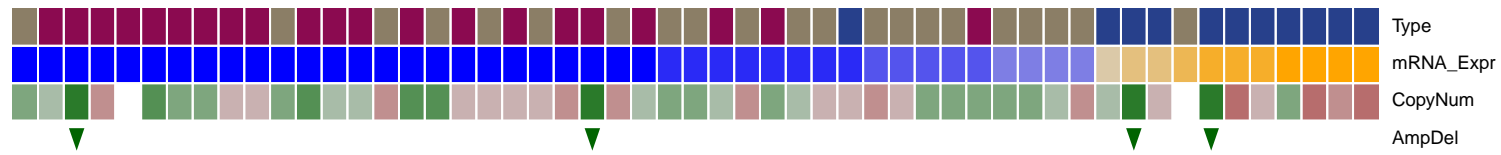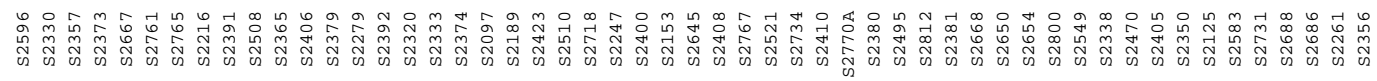

# FZD2

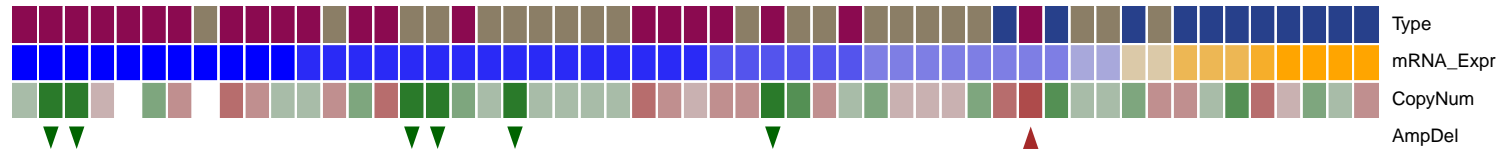

17 : 42633739  
 17 : 42633783  
 17 : 42634955  
 17 : 42635310  
 17 : 42635419  
 17 : 42635778  
 17 : 42635789  
 17 : 42636006  
 17 : 42636570

GeneLoc  
 PromoterAssoc  
 CpIsland

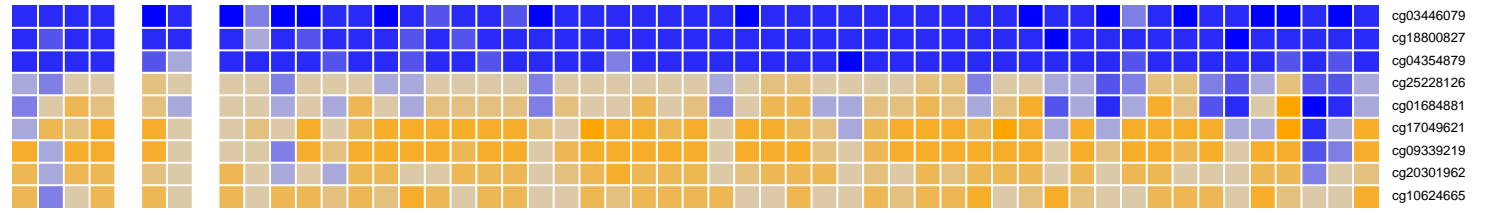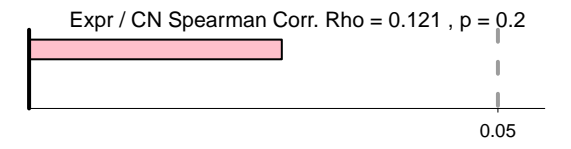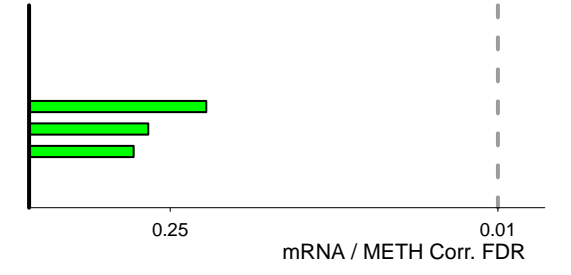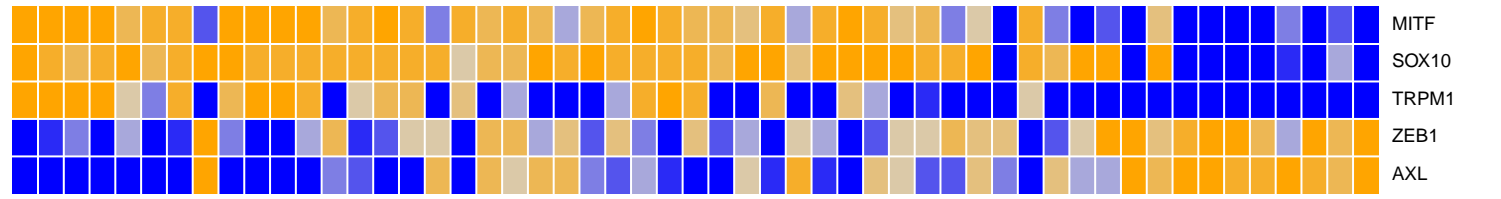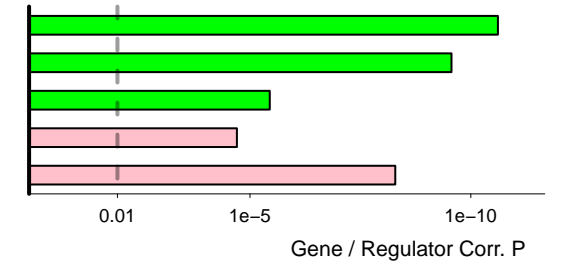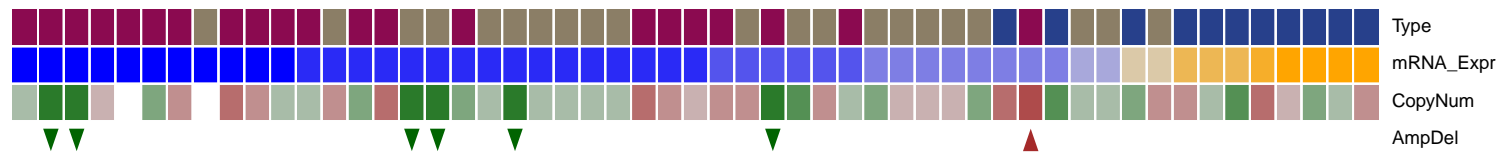

S2400  
 S2521  
 S2765  
 S2391  
 S2667  
 S2373  
 S2510  
 S2350  
 S2718  
 S2374  
 S2408  
 S2216  
 S2380  
 S2668  
 S2406  
 S2596  
 S2654  
 S2357  
 S2423  
 S2381  
 S2410  
 S2650  
 S2392  
 S2247  
 S2320  
 S2330  
 S2379  
 S2761  
 S2812  
 S2508  
 S2800  
 S2734  
 S2279  
 S2097  
 S2767  
 S2333  
 S2645  
 S2365  
 S2686  
 S2189  
 S2405  
 S2549  
 S2495  
 S2770A  
 S2153  
 S2688  
 S2356  
 S2261  
 S2338  
 S2731  
 S2470  
 S2583  
 S2125

# PAPPA

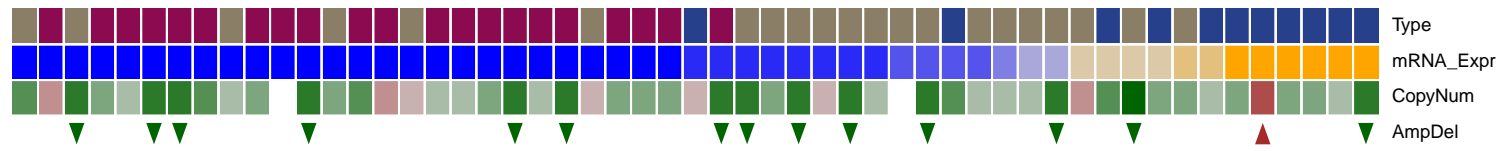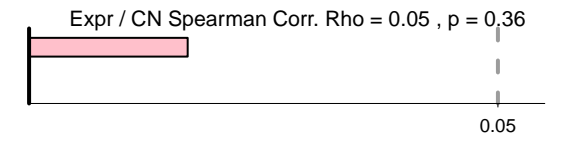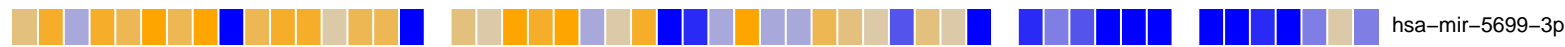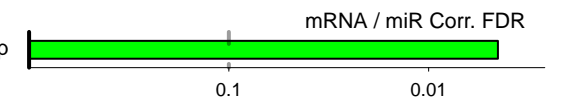

- 9:118915832
- 9:118915867
- 9:118915907
- 9:118916132
- 9:118916493
- 9:118916976
- 9:118917109
- 9:118917650
- 9:118918160
- 9:118950322
- 9:118996078
- 9:119000864
- 9:119041784
- 9:119048807
- 9:119084239
- 9:119085681
- 9:119139356
- 9:119159075

GeneLoc  
PromoterAssoc  
CpGIsland

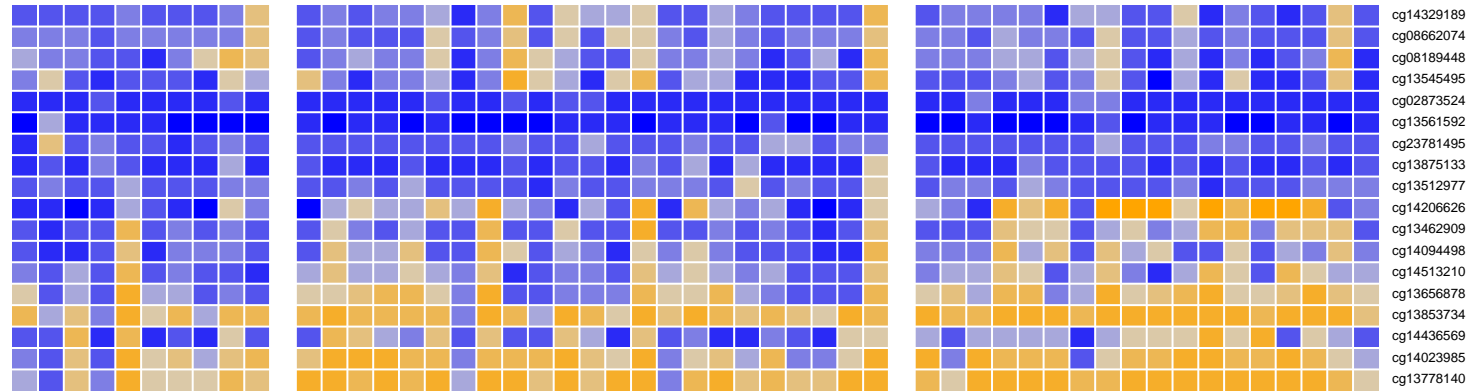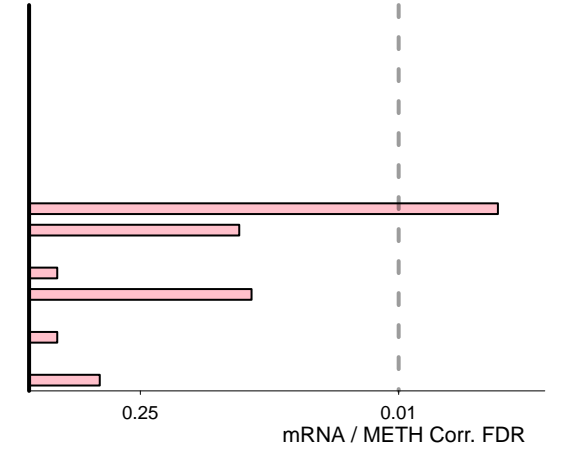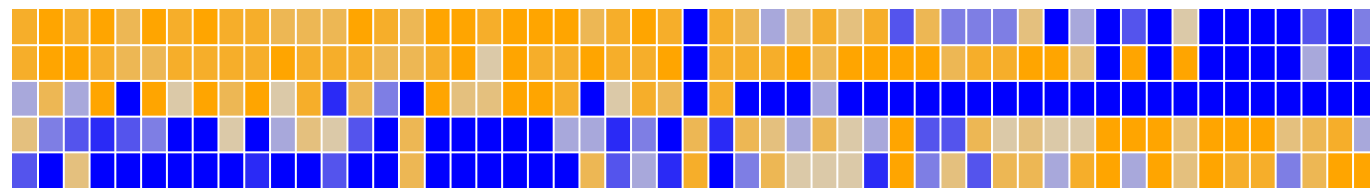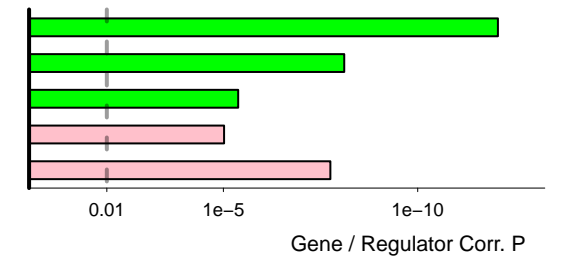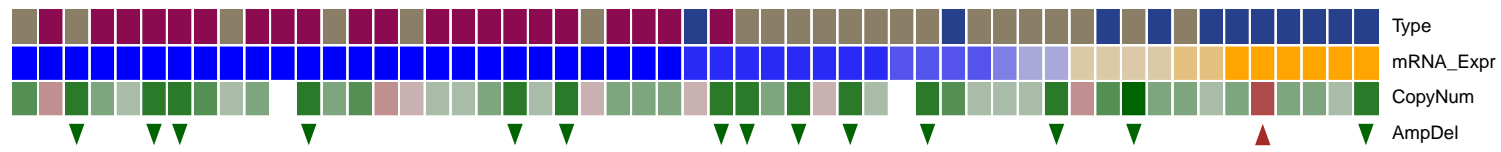

- S2247
- S2718
- S2097
- S2521
- S2761
- S2765
- S2189
- S2374
- S2596
- S2330
- S2667
- S2379
- S2333
- S2406
- S2373
- S2423
- S2391
- S2279
- S2357
- S2400
- S2408
- S2216
- S2410
- S2668
- S2320
- S2508
- S2338
- S2510
- S2380
- S2650
- S2812
- S2381
- S2767
- S2734
- S2350
- S2392
- S2405
- S2645
- S2654
- S2153
- S2549
- S2800
- S2770A
- S2495
- S2125
- S2365
- S2356
- S2261
- S2470
- S2686
- S2583
- S2688
- S2731

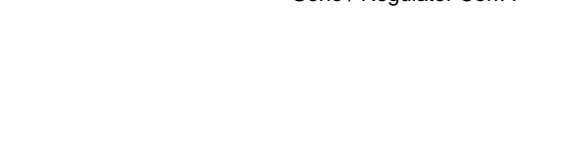

# WNT5A

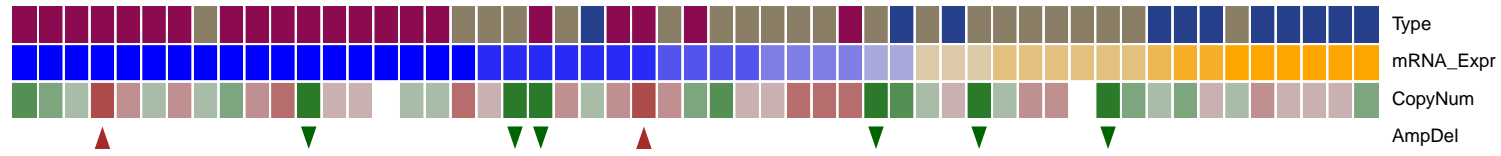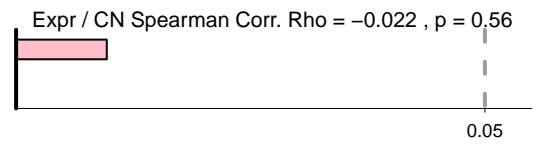

3 : 55525967  
 3 : 55525577  
 3 : 55524048  
 3 : 55523950  
 3 : 55523895  
 3 : 55523815  
 3 : 55523594  
 3 : 55523173  
 3 : 55523099  
 3 : 55522835  
 3 : 55522716  
 3 : 55522611  
 3 : 55521431  
 3 : 55521376  
 3 : 55521373  
 3 : 55521351  
 3 : 55521141  
 3 : 55521134  
 3 : 55520834  
 3 : 55520476  
 3 : 55520360  
 3 : 55519588  
 3 : 55519186  
 3 : 55518798  
 3 : 55518441  
 3 : 55518396  
 3 : 55518383  
 3 : 55518142  
 3 : 55518131  
 3 : 55518121  
 3 : 55518091  
 3 : 55517853  
 3 : 55517806  
 3 : 55517659  
 3 : 55517496  
 3 : 55517224  
 3 : 55517101  
 3 : 55516711  
 3 : 55516366  
 3 : 55516243  
 3 : 55516184  
 3 : 55515607  
 3 : 55515541  
 3 : 55515411  
 3 : 55515168  
 3 : 55514421  
 3 : 55513773  
 3 : 55512950  
 3 : 55511693  
 3 : 55510396  
 3 : 55508686  
 3 : 55508585  
 3 : 55508460  
 3 : 55508379  
 3 : 55507559  
 3 : 55506872  
 3 : 55505073  
 3 : 55504433  
 3 : 55504356  
 3 : 55504238  
 3 : 55504202  
 3 : 55502488  
 3 : 55500374

GeneLoc  
 PromoterAssoc  
 CpGIsland

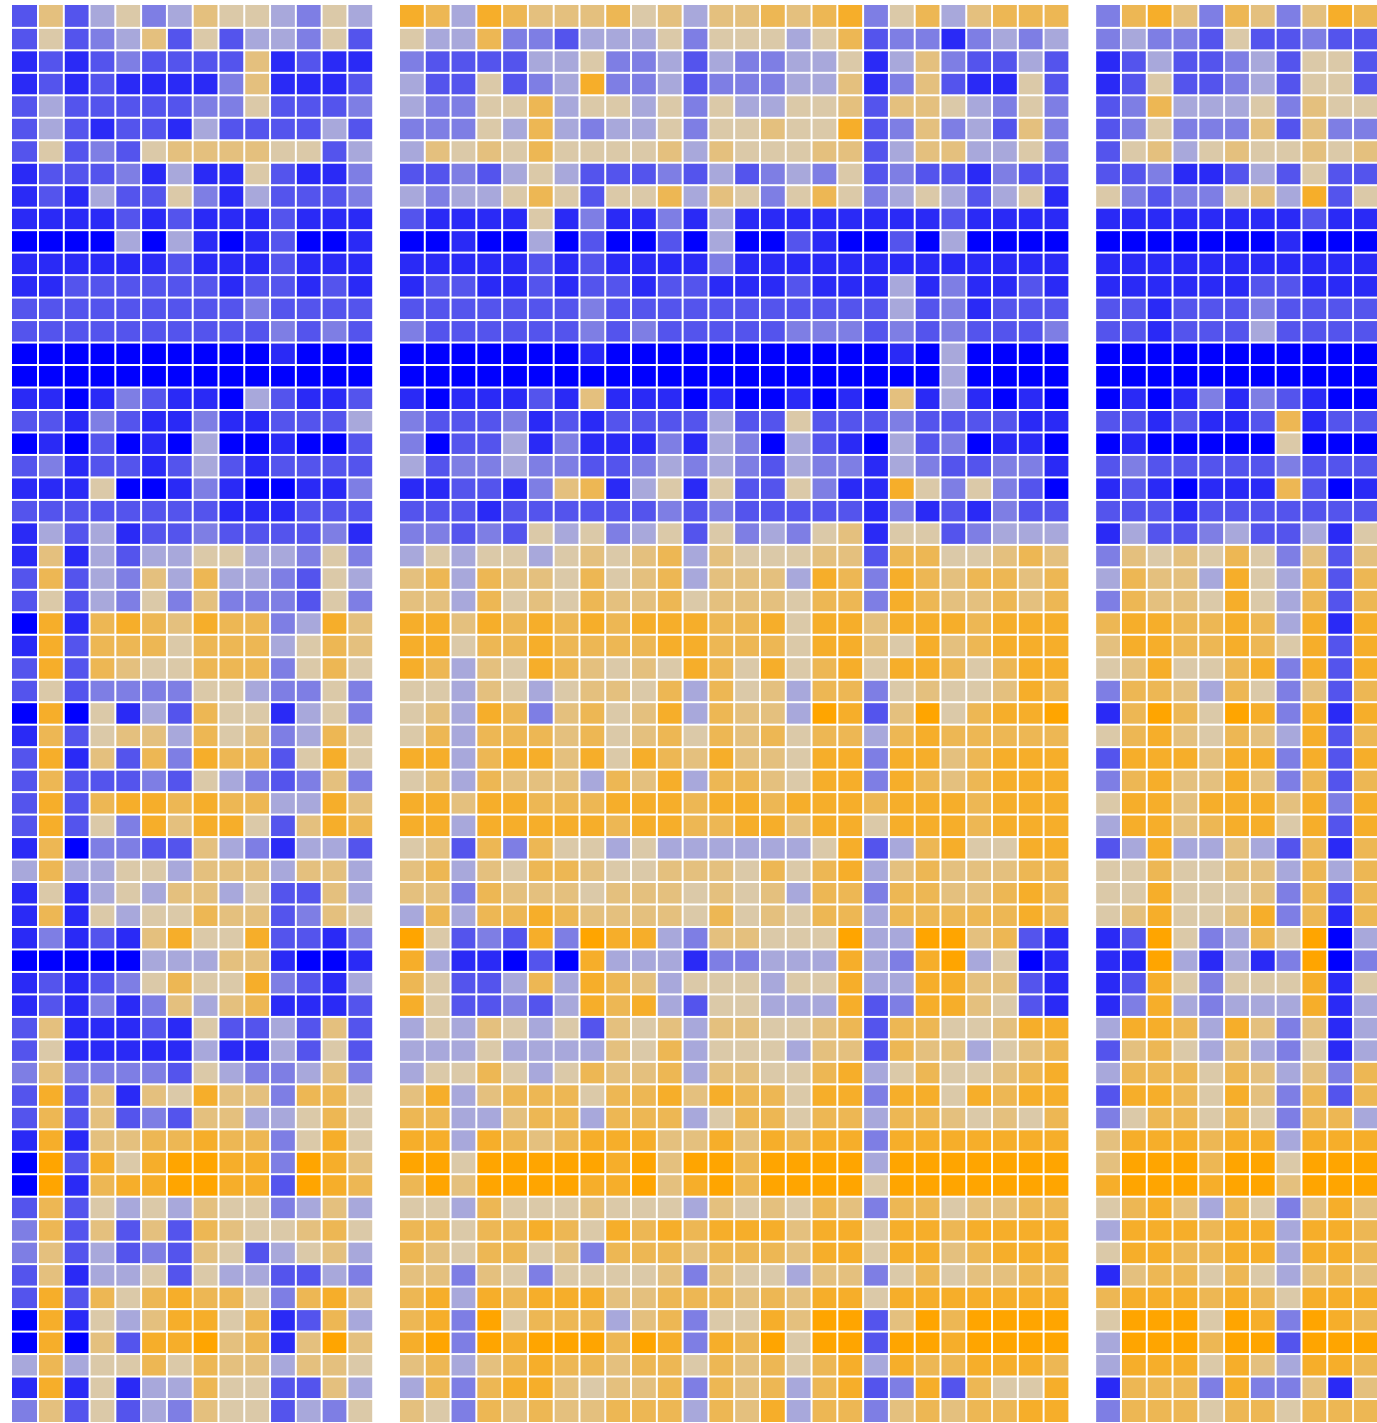

cg24158324  
 cg18766210  
 cg25119690  
 cg04394267  
 cg17701073  
 cg24377179  
 cg07278054  
 cg26468336  
 cg06678678  
 cg16638266  
 cg15070848  
 cg08514735  
 cg13874466  
 cg15051960  
 cg24942186  
 cg22615158  
 cg12622139  
 cg19554389  
 cg00828602  
 cg09024340  
 cg10250321  
 cg26712080  
 cg17246714  
 cg11293176  
 cg23456221  
 cg02867696  
 cg08666668  
 cg24216596  
 cg04941246  
 cg17679453  
 cg18010752  
 cg18562578  
 cg27364162  
 cg08852968  
 cg20746482  
 cg01777121  
 cg03588998  
 cg26554505  
 cg08217388  
 cg05048976  
 cg08832220  
 cg05781968  
 cg09595163  
 cg26116485  
 cg15585318  
 cg22143766  
 cg02298472  
 cg14507014  
 cg20741319  
 cg11581280  
 cg06311863  
 cg10701252  
 cg17553300  
 cg01109065  
 cg20000481  
 cg04685478  
 cg09435227  
 cg26797723  
 cg16049468  
 cg19483126  
 cg00942997  
 cg01183244  
 cg03843656

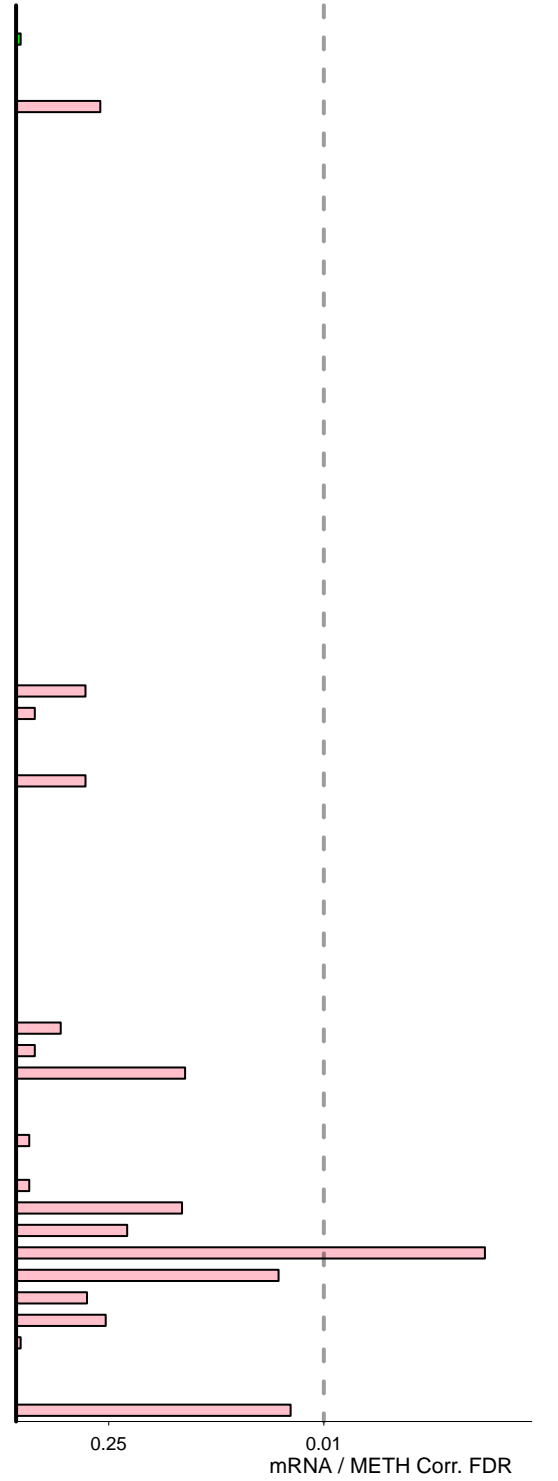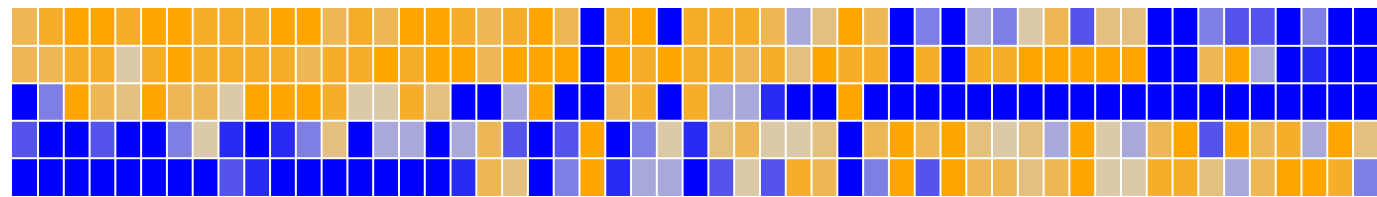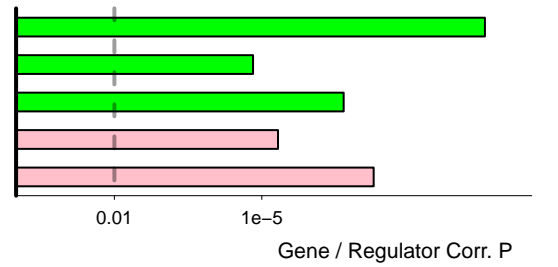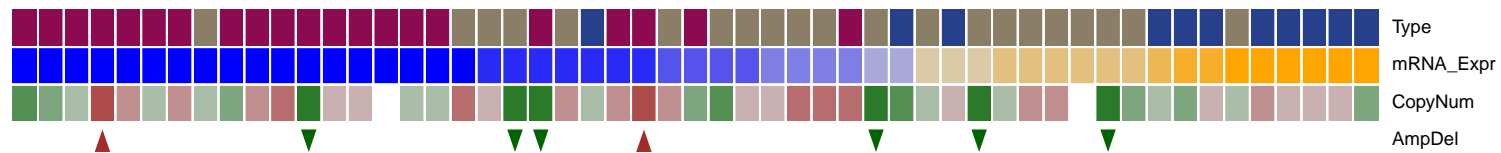

S2761  
 S2373  
 S2374  
 S2406  
 S2357  
 S2408  
 S2596  
 S2668  
 S2330  
 S2521  
 S2765  
 S2379  
 S2189  
 S2667  
 S2216  
 S2279  
 S2734  
 S2423  
 S2097  
 S2400  
 S2392  
 S2356  
 S2508  
 S2320  
 S2549  
 S2510  
 S2247  
 S2381  
 S2333  
 S2800  
 S2153  
 S2391  
 S2380  
 S2770A  
 S2645  
 S2125  
 S2125  
 S2650  
 S2654  
 S2365  
 S2410  
 S2350  
 S2767  
 S2812  
 S2338  
 S2261  
 S2405  
 S2495  
 S2583  
 S2688  
 S2731  
 S2470  
 S2686

Type  
 mRNA\_Expr  
 CopyNum  
 AmpDel

# TGM2

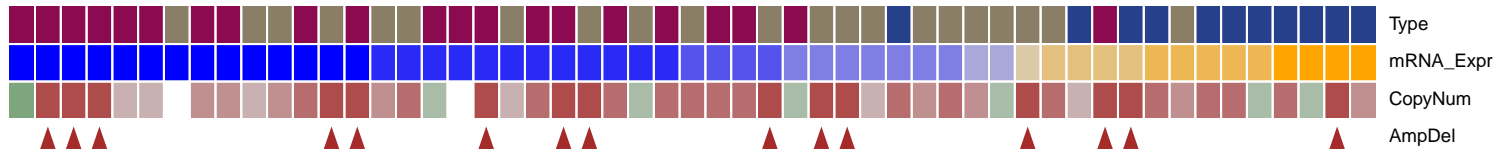

20 : 36796513  
 20 : 36794002  
 20 : 36793996  
 20 : 36793970  
 20 : 36793866  
 20 : 36793747  
 20 : 36793744  
 20 : 36793726  
 20 : 36793715  
 20 : 36793705  
 20 : 36793614  
 20 : 36793608  
 20 : 36793373  
 20 : 36789861  
 20 : 36767986

GeneLoc  
 PromoterAssoc  
 CpGIsland

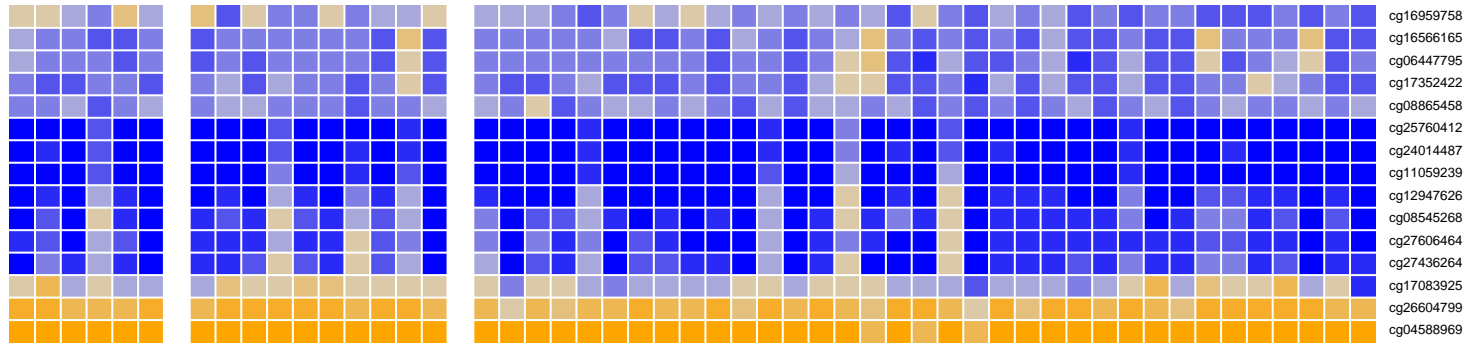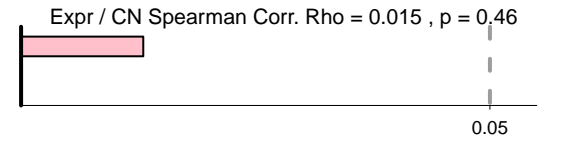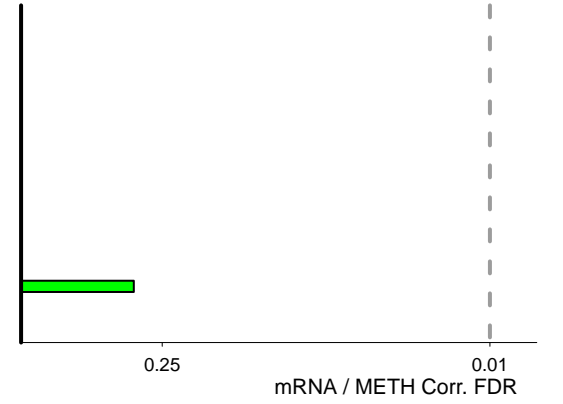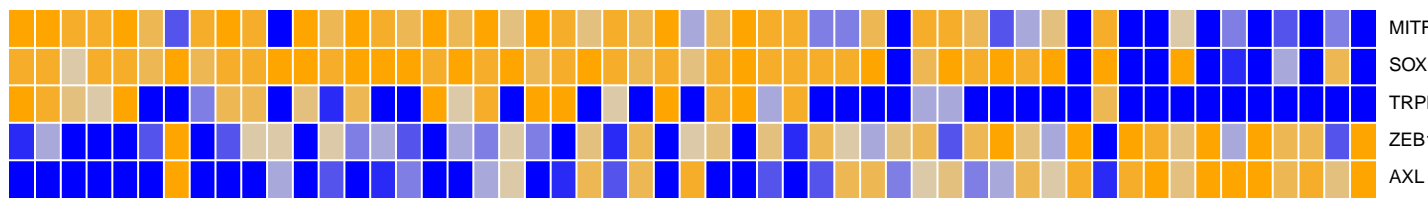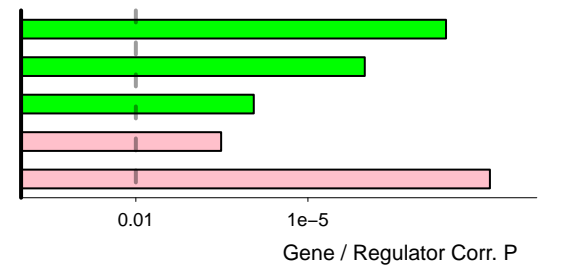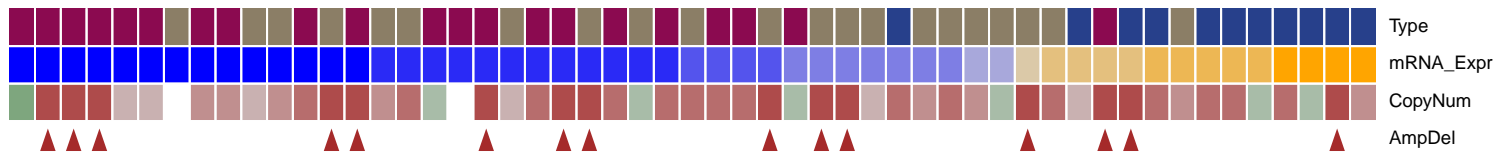

S2521  
 S2216  
 S2357  
 S2189  
 S2391  
 S2761  
 S2350  
 S2373  
 S2406  
 S2596  
 S2549  
 S2279  
 S2333  
 S2718  
 S2734  
 S2392  
 S2408  
 S2667  
 S2320  
 S2767  
 S2765  
 S2330  
 S2153  
 S2668  
 S2423  
 S2374  
 S2800  
 S2379  
 S2400  
 S2247  
 S2510  
 S2645  
 S2654  
 S2410  
 S2686  
 S2381  
 S2097  
 S2380  
 S2495  
 S2650  
 S2812  
 S2470  
 S2508  
 S2261  
 S2688  
 S2365  
 S2770A  
 S2731  
 S2356  
 S2583  
 S2338  
 S2405  
 S2125





# SQRDL

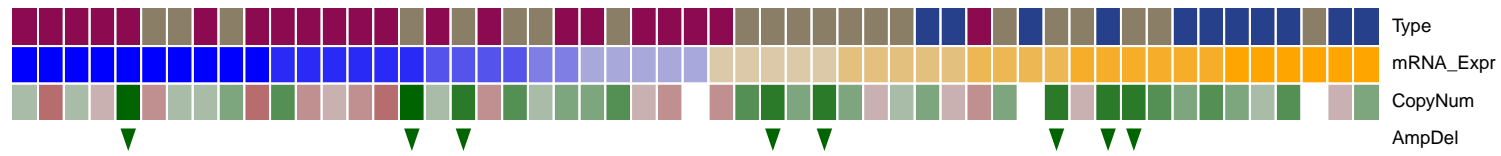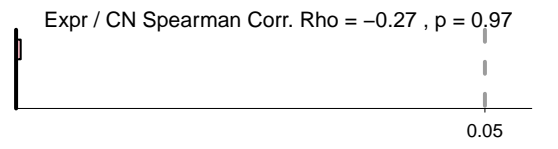

- 15 : 45924140
- 15 : 45926780
- 15 : 45926878
- 15 : 45927012
- 15 : 45927050
- 15 : 45927086
- 15 : 45927123
- 15 : 45927126
- 15 : 45927218
- 15 : 45927255
- 15 : 45927921
- 15 : 45929860
- 15 : 45937757
- 15 : 45943467
- 15 : 45952725
- 15 : 45962135
- 15 : 45983303

GeneLoc  
PromoterAssoc  
CpGIsland

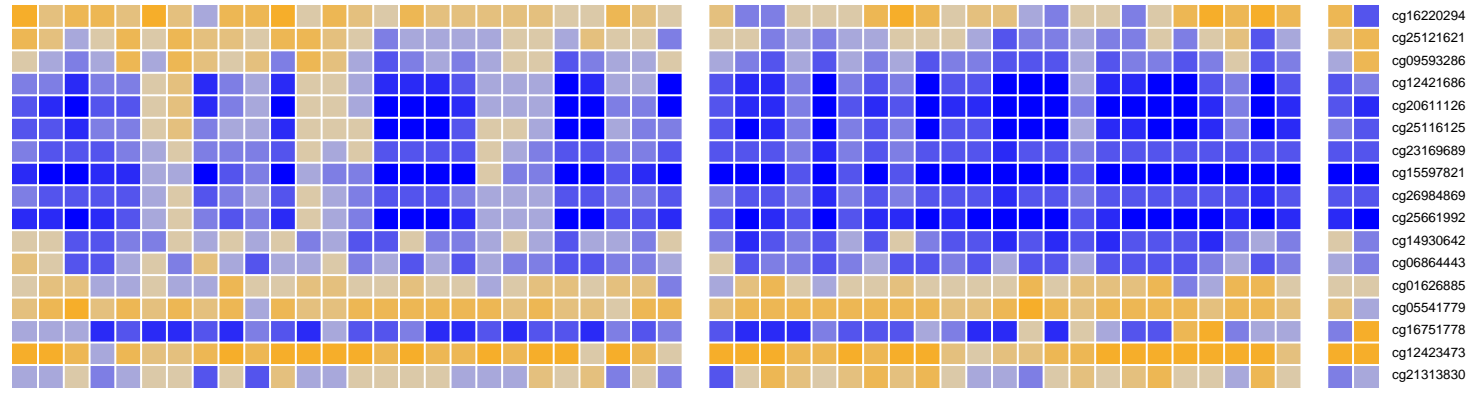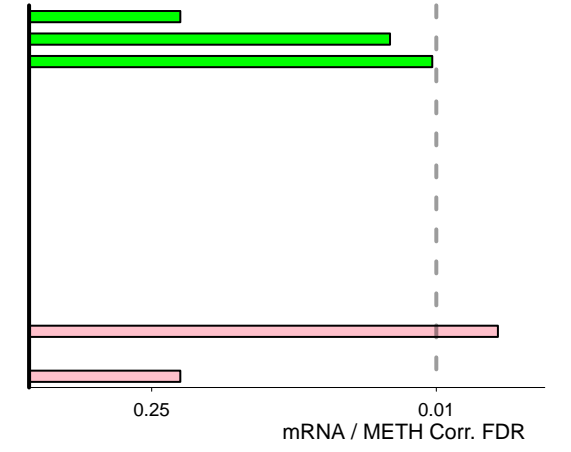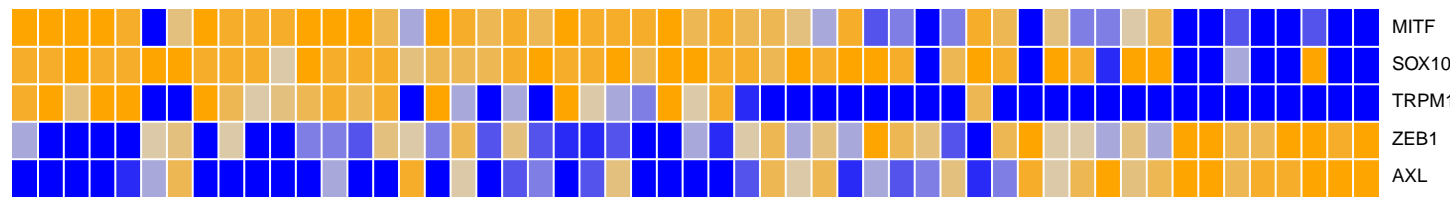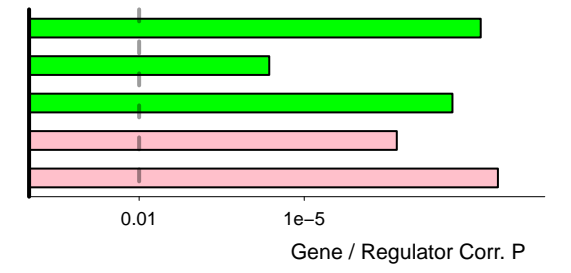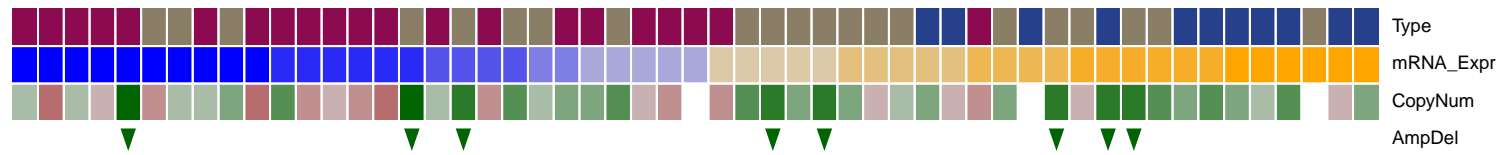

- S2216
- S2391
- S2279
- S2374
- S2330
- S2549
- S2153
- S2408
- S2596
- S2189
- S2357
- S2718
- S2320
- S2406
- S2379
- S2800
- S2765
- S2381
- S2761
- S2247
- S2392
- S2521
- S2668
- S2097
- S2373
- S2400
- S2667
- S2510
- S2333
- S2423
- S2812
- S2650
- S2734
- S2495
- S2645
- S2686
- S2405
- S2508
- S2380
- S2470
- S2767
- S2654
- S2731
- S2365
- S2410
- S2356
- S2770A
- S2583
- S2338
- S2261
- S2350
- S2688
- S2125

# IRF1

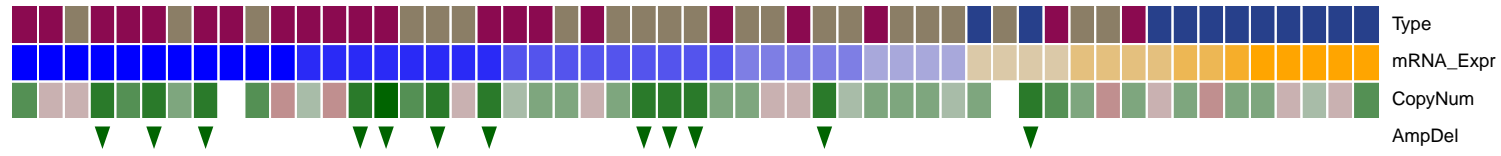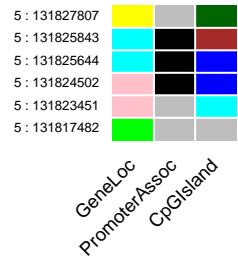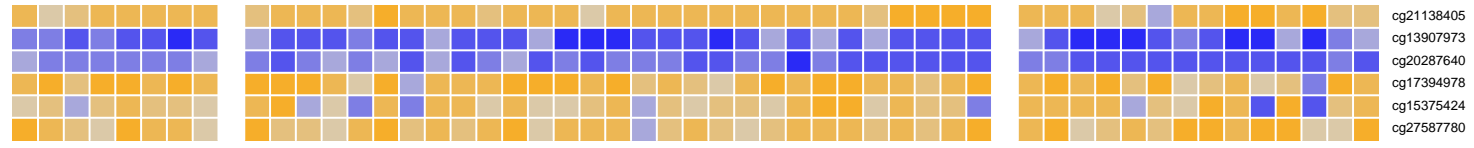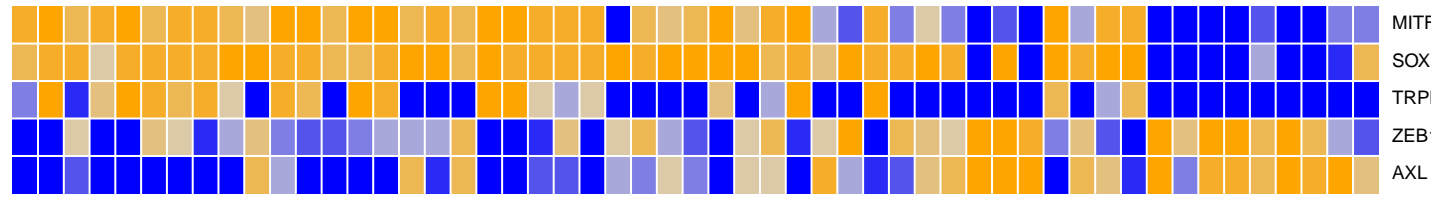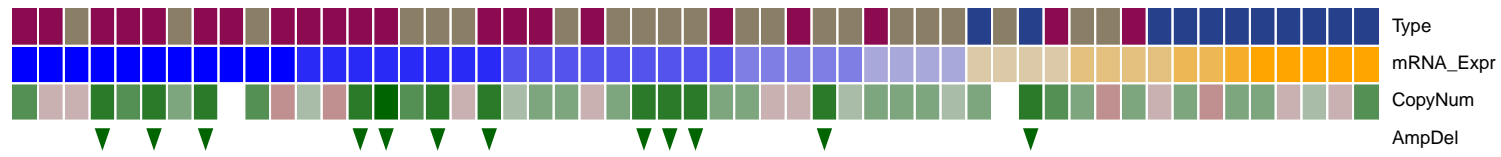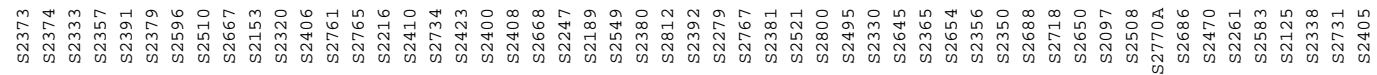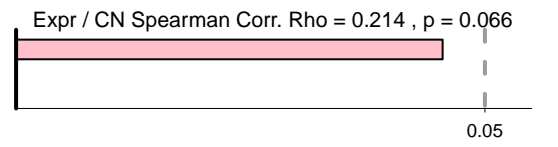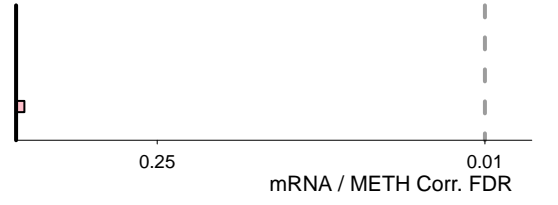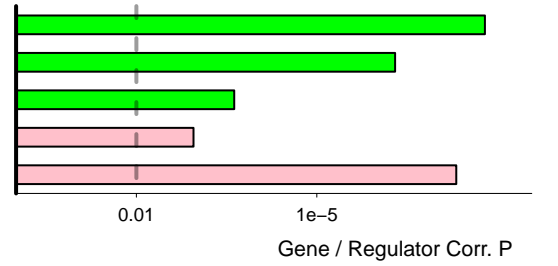

# SMURF2

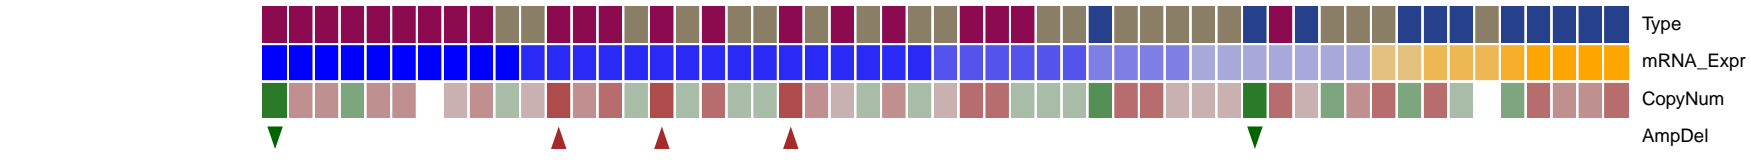

17 : 62658919  
 17 : 62656813  
 17 : 62608856

GeneLoc  
 PromoterAssoc  
 CpGIsland

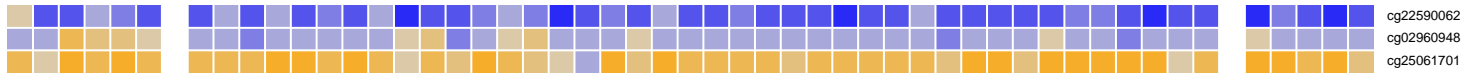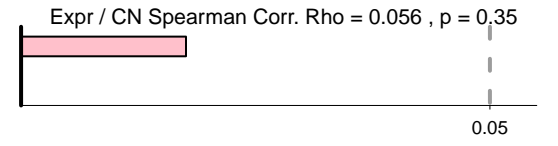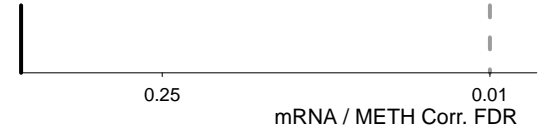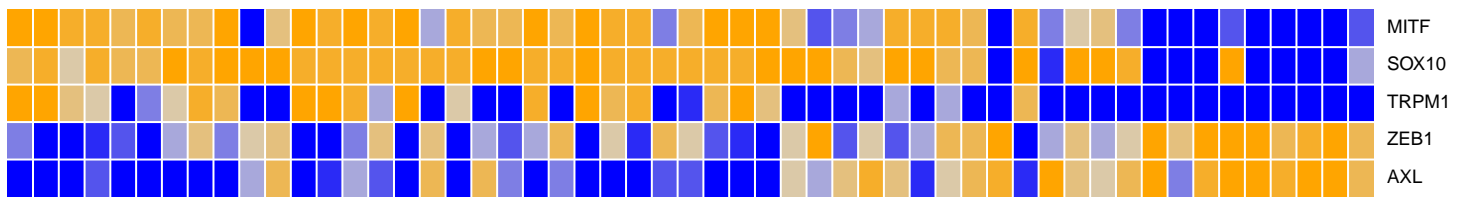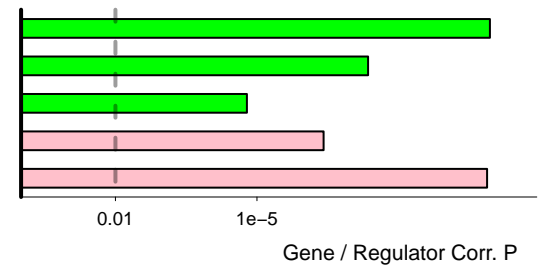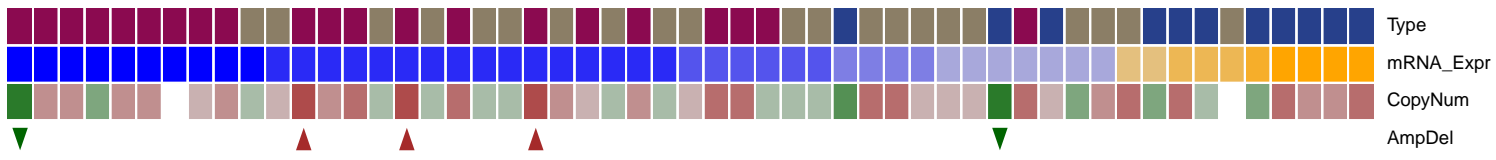

S2765  
 S2374  
 S2357  
 S2668  
 S2761  
 S2373  
 S2667  
 S2379  
 S2718  
 S2549  
 S2153  
 S2391  
 S2330  
 S2320  
 S2247  
 S2408  
 S2650  
 S2189  
 S2410  
 S2392  
 S2216  
 S2380  
 S2400  
 S2596  
 S2510  
 S2645  
 S2333  
 S2406  
 S2521  
 S2279  
 S2767  
 S2495  
 S2405  
 S2800  
 S2097  
 S2734  
 S2381  
 S2423  
 S2470  
 S2508  
 S2731  
 S2365  
 S2812  
 S2654  
 S2770A  
 S2686  
 S2261  
 S2350  
 S2356  
 S2338  
 S2688  
 S2125  
 S2583

# IGFBP6

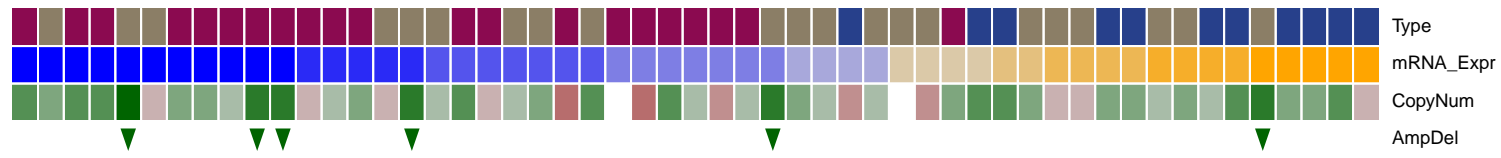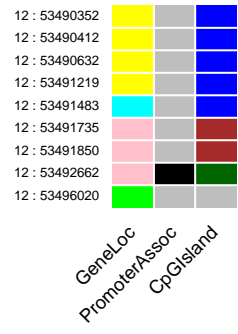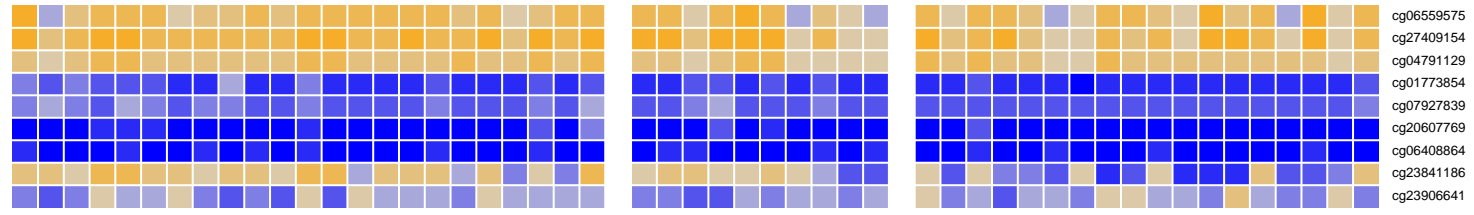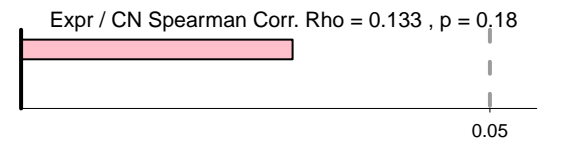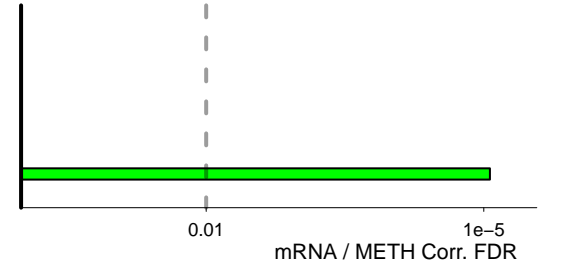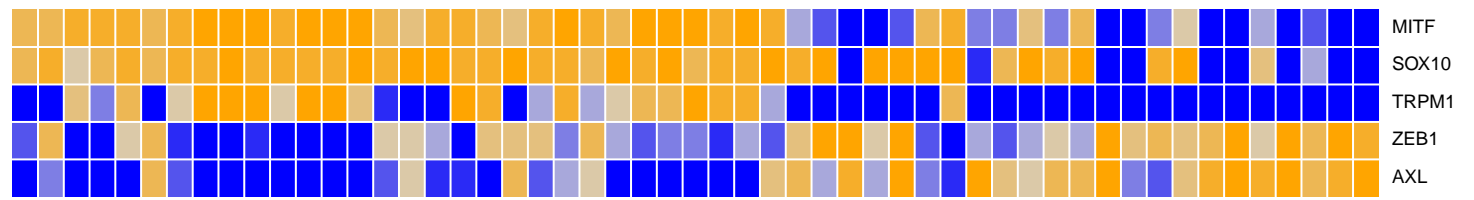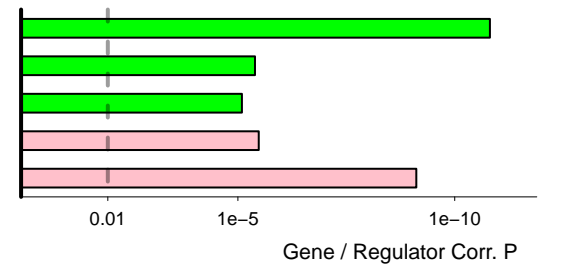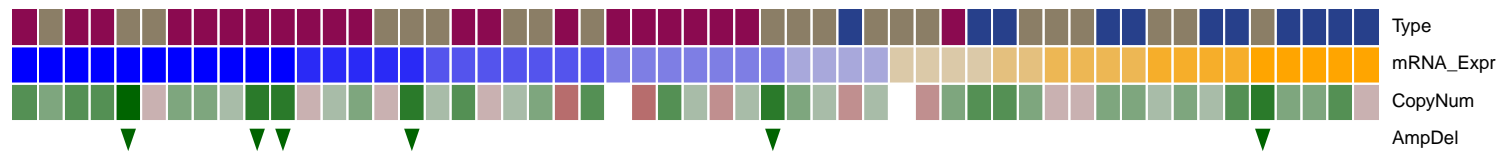

S2761  
S2380  
S2357  
S2373  
S2596  
S2423  
S2668  
S2374  
S2400  
S2521  
S2189  
S2391  
S2408  
S2279  
S2333  
S2767  
S2734  
S2330  
S2379  
S2153  
S2247  
S2320  
S2381  
S2667  
S2406  
S2718  
S2765  
S2510  
S2216  
S2097  
S2650  
S2495  
S2470  
S2549  
S2350  
S2392  
S2508  
S2731  
S2405  
S2812  
S2654  
S2410  
S2356  
S2686  
S2645  
S2365  
S2338  
S2770A  
S2800  
S2125  
S2583  
S2261  
S2688

# RRAS

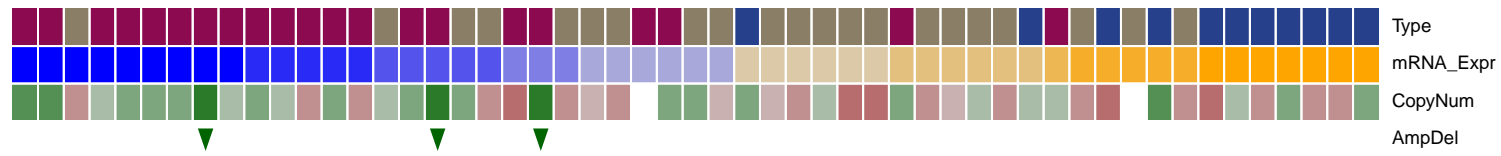

19 : 50141490  
 19 : 50139654  
 19 : 50138797

GeneLoc  
 PromoterAssoc  
 CpGIsland

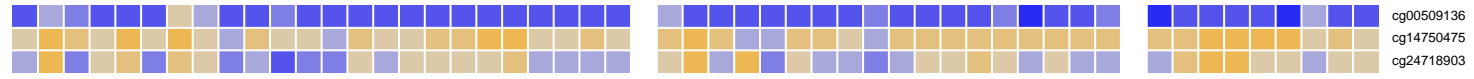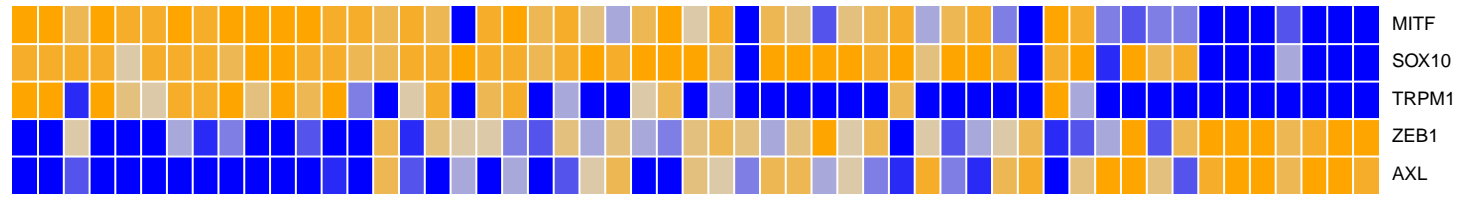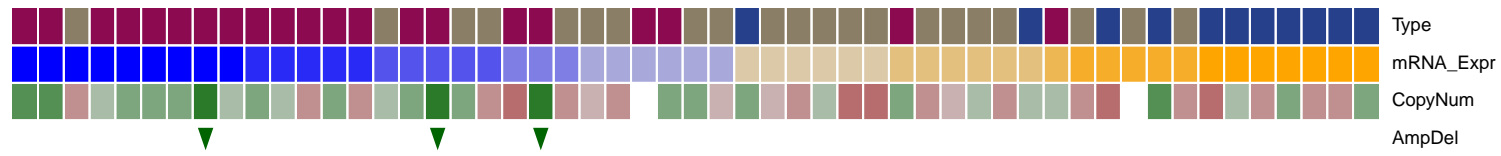

S2374  
 S2391  
 S2333  
 S2408  
 S2357  
 S2189  
 S2216  
 S2510  
 S2765  
 S2279  
 S2400  
 S2406  
 S2330  
 S2373  
 S2423  
 S2668  
 S2379  
 S2549  
 S2596  
 S2320  
 S2761  
 S2247  
 S2812  
 S2650  
 S2667  
 S2718  
 S2365  
 S2381  
 S2686  
 S2410  
 S2153  
 S2495  
 S2767  
 S2380  
 S2508  
 S2800  
 S2392  
 S2734  
 S2654  
 S2338  
 S2521  
 S2097  
 S2731  
 S2350  
 S2405  
 S2645  
 S2470  
 S2356  
 S2770A  
 S2583  
 S2688  
 S2125  
 S2261

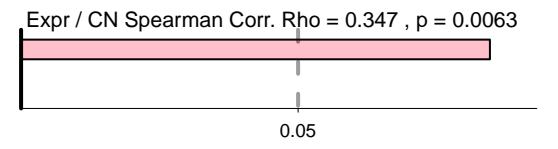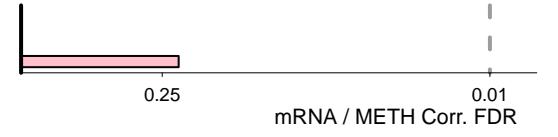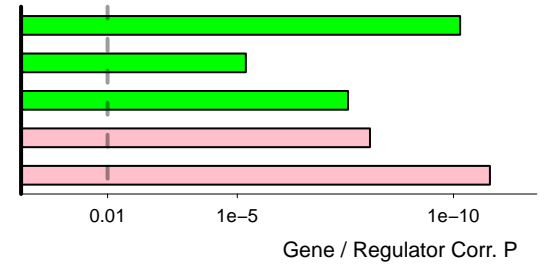

# TGFBR2

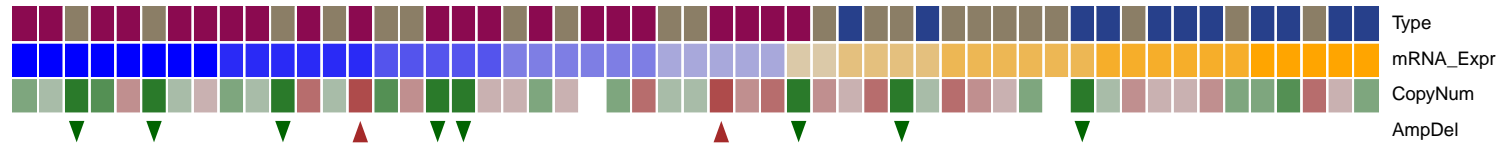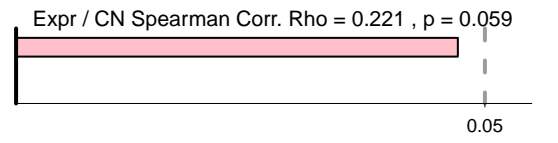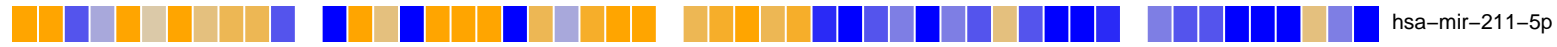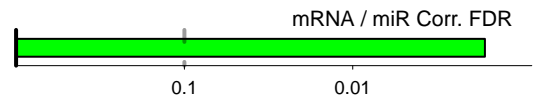

3 : 30647378  
3 : 30647540  
3 : 30647670  
3 : 30647672  
3 : 30647725  
3 : 30647773  
3 : 30649017  
3 : 30651317  
3 : 30670335  
3 : 30673459  
3 : 30691493  
3 : 30698876  
3 : 30700056  
3 : 30702018  
3 : 30706645  
3 : 30708746  
3 : 30714671  
3 : 30722557  
3 : 30734274

GeneLoc  
PromoterAssoc  
CpGIsland

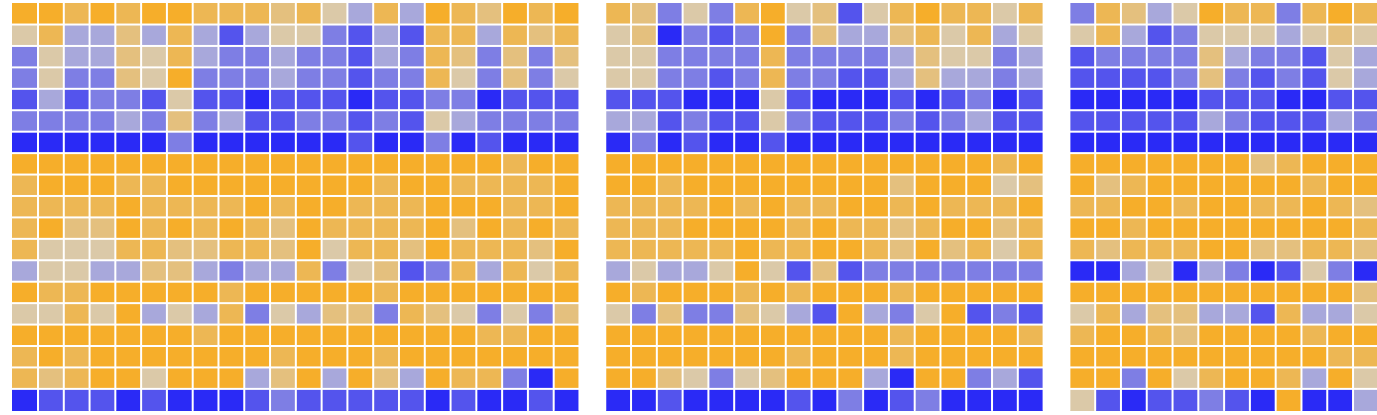

cg26376346  
cg24321706  
cg12419522  
cg19995459  
cg19482049  
cg12926720  
cg03256955  
cg04916416  
cg06270049  
cg19615017  
cg24719910  
cg21814995  
cg09417692  
cg03630790  
cg23485307  
cg07613391  
cg15724876  
cg15171154  
cg06784602

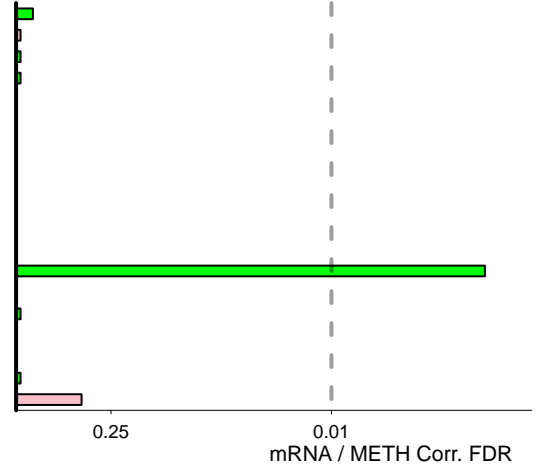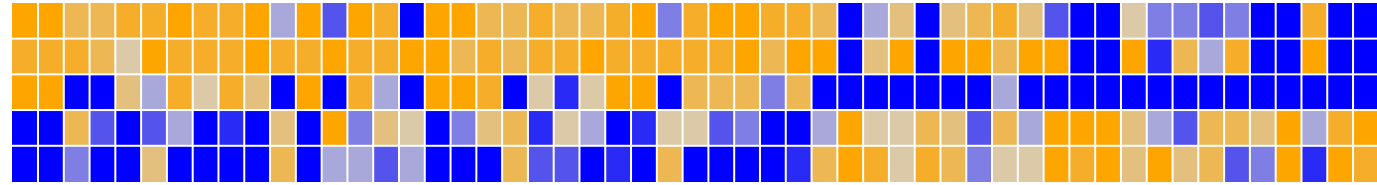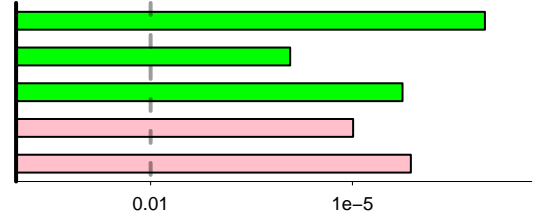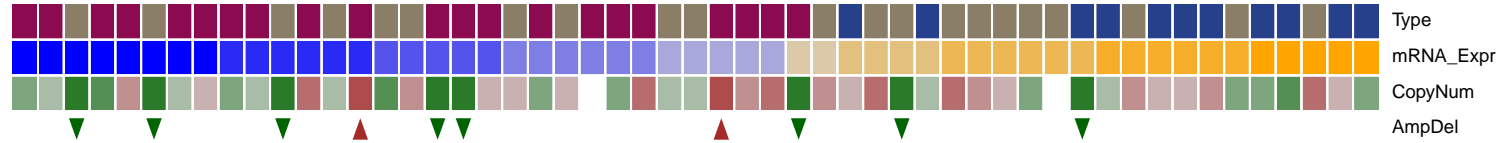

S2374  
S2408  
S2380  
S2761  
S2357  
S2097  
S2216  
S2189  
S2510  
S2279  
S2650  
S2391  
S2495  
S2320  
S2247  
S2549  
S2400  
S2765  
S2379  
S2423  
S2668  
S2333  
S2667  
S2330  
S2521  
S2654  
S2596  
S2406  
S2718  
S2373  
S2508  
S2410  
S2125  
S2800  
S2767  
S2338  
S2153  
S2392  
S2381  
S2812  
S2350  
S2470  
S2356  
S2365  
S2731  
S2405  
S2583  
S2645  
S2686  
S2770A  
S2734  
S2688  
S2261

# TPM

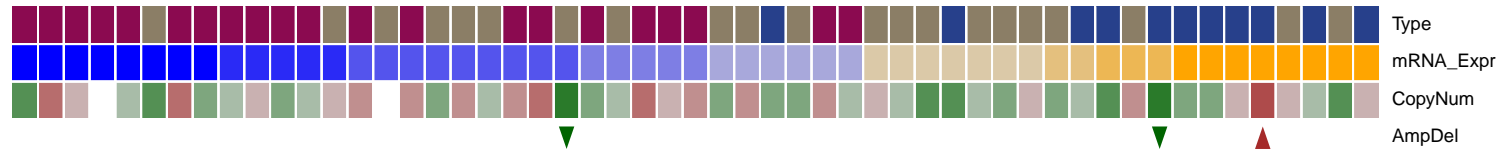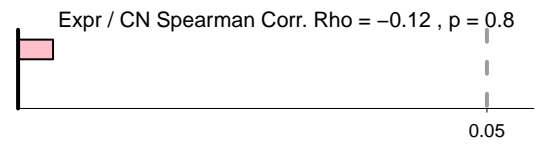

15 : 63333476  
15 : 63333792  
15 : 63333846  
15 : 63334355  
15 : 63334436  
15 : 63334506  
15 : 63334699  
15 : 63334703  
15 : 63334706  
15 : 63334714  
15 : 63334761  
15 : 63334937  
15 : 63335016  
15 : 63335302  
15 : 63336009  
15 : 63337352  
15 : 63337496  
15 : 63340700  
15 : 63340702  
15 : 63341214  
15 : 63341381  
15 : 63341463  
15 : 63342033  
15 : 63342288  
15 : 63345124  
15 : 63345512  
15 : 63349192  
15 : 63353166  
15 : 63355027  
15 : 63358260  
15 : 63358672

GeneLoc  
PromoterAssoc  
CpGIsland

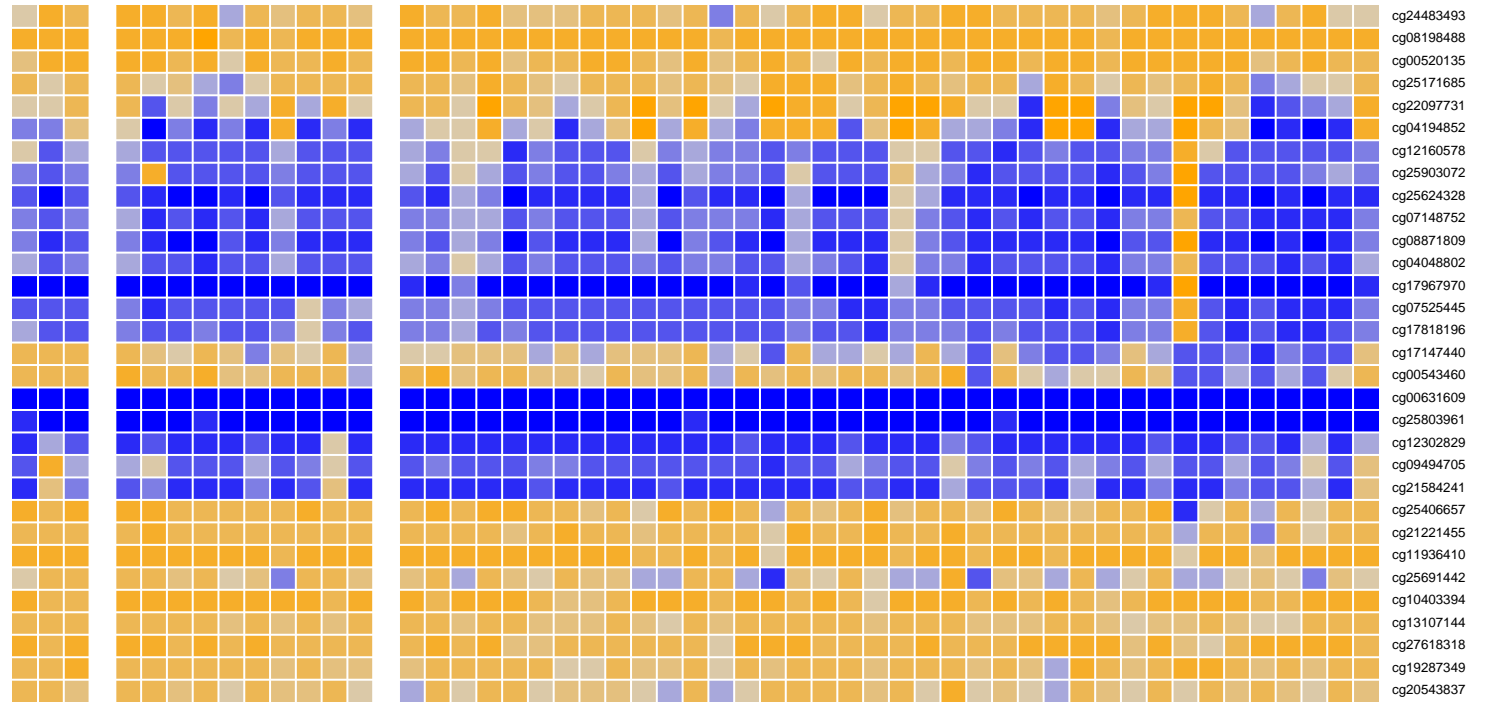

cg24483493  
cg08198488  
cg00520135  
cg25171685  
cg22097731  
cg04194852  
cg12160578  
cg25903072  
cg25624328  
cg07148752  
cg08871809  
cg04048802  
cg17967970  
cg07525445  
cg17818196  
cg17147440  
cg00543460  
cg00631609  
cg25803961  
cg12302829  
cg09494705  
cg21584241  
cg25406657  
cg21221455  
cg11936410  
cg25691442  
cg10403394  
cg13107144  
cg27618318  
cg19287349  
cg20543837

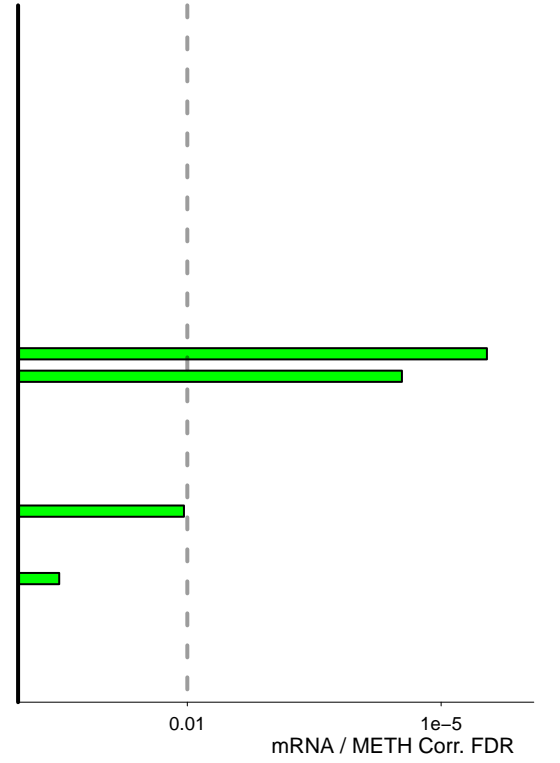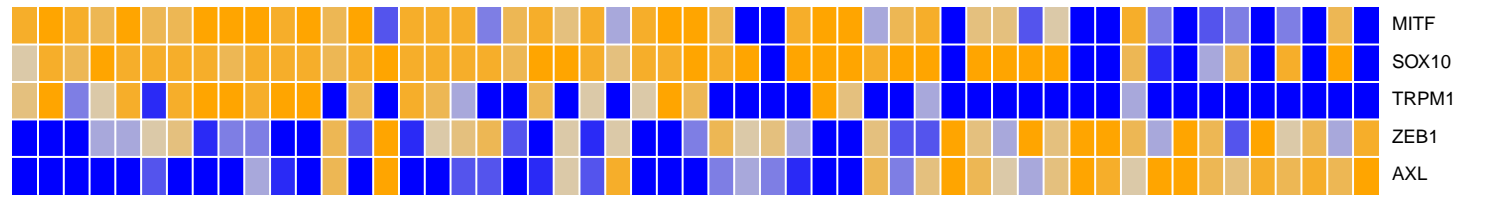

MITF  
SOX10  
TRPM1  
ZEB1  
AXL

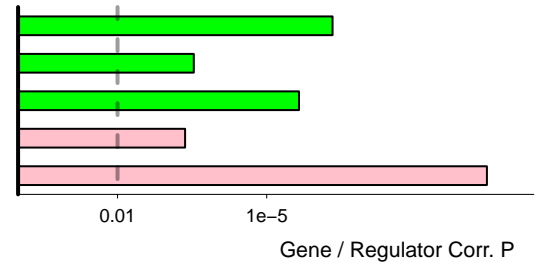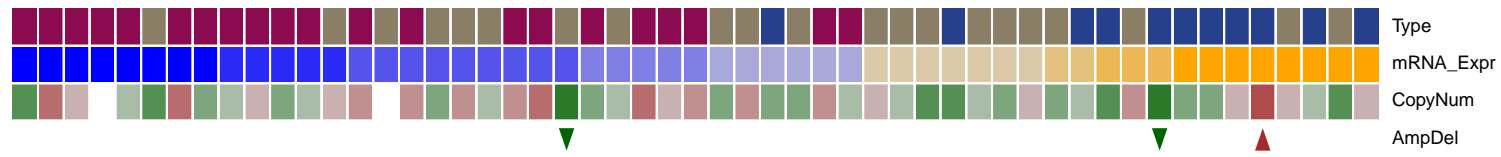

S2357  
S2391  
S2373  
S2667  
S2216  
S2333  
S2379  
S2521  
S2765  
S2320  
S2330  
S2408  
S2423  
S2406  
S2350  
S2510  
S2596  
S2247  
S2645  
S2761  
S2508  
S2767  
S2668  
S2800  
S2189  
S2374  
S2718  
S2380  
S2549  
S2686  
S2734  
S2400  
S2279  
S2650  
S2392  
S2097  
S2770A  
S2153  
S2812  
S2495  
S2365  
S2356  
S2261  
S2381  
S2731  
S2125  
S2583  
S2405  
S2470  
S2654  
S2338  
S2410  
S2688

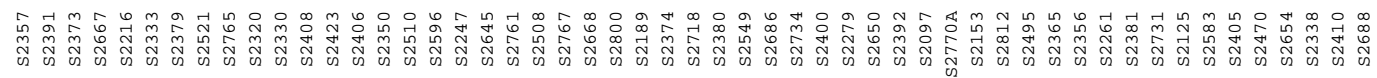

# BDNF

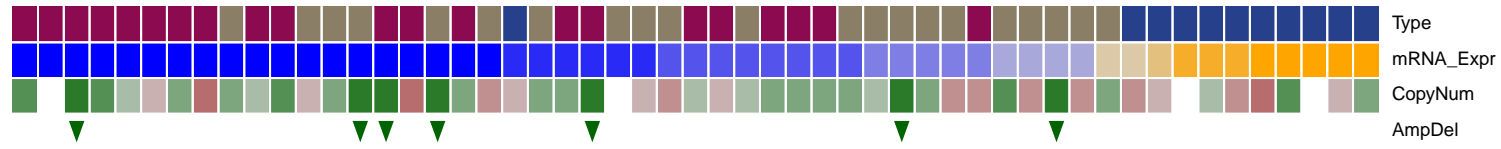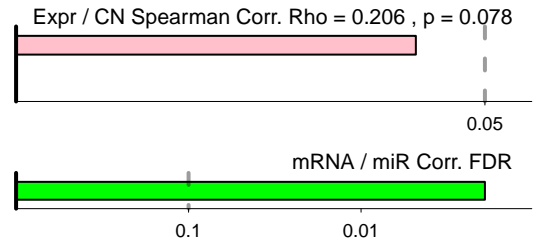

11 : 27744816  
11 : 27744759  
11 : 27744675  
11 : 27744557  
11 : 27744490  
11 : 27744363  
11 : 27744049  
11 : 27743664  
11 : 27743648  
11 : 27743619  
11 : 27743580  
11 : 27743476  
11 : 27743348  
11 : 27743258  
11 : 27742832  
11 : 27742454  
11 : 27742435  
11 : 27742369  
11 : 27742355  
11 : 27742219  
11 : 27742138  
11 : 27742060  
11 : 27741916  
11 : 27741077  
11 : 27740876  
11 : 27740813  
11 : 27740495  
11 : 27740161  
11 : 27739827  
11 : 27732958  
11 : 27723789  
11 : 27723409  
11 : 27723385  
11 : 27723290  
11 : 27723245  
11 : 27723237  
11 : 27723218  
11 : 27723214  
11 : 27723190  
11 : 27723128  
11 : 27723075  
11 : 27722889  
11 : 27722638  
11 : 27722636  
11 : 27722620  
11 : 27722037  
11 : 27721270  
11 : 27721222  
11 : 27721088  
11 : 27718978  
11 : 27701991  
11 : 27696004  
11 : 27695210  
11 : 27683959  
11 : 27681475  
11 : 27680480  
11 : 27679729  
11 : 27679632  
11 : 27679469  
11 : 27677125

GeneLoc  
PromoterAssoc  
CpGIsland

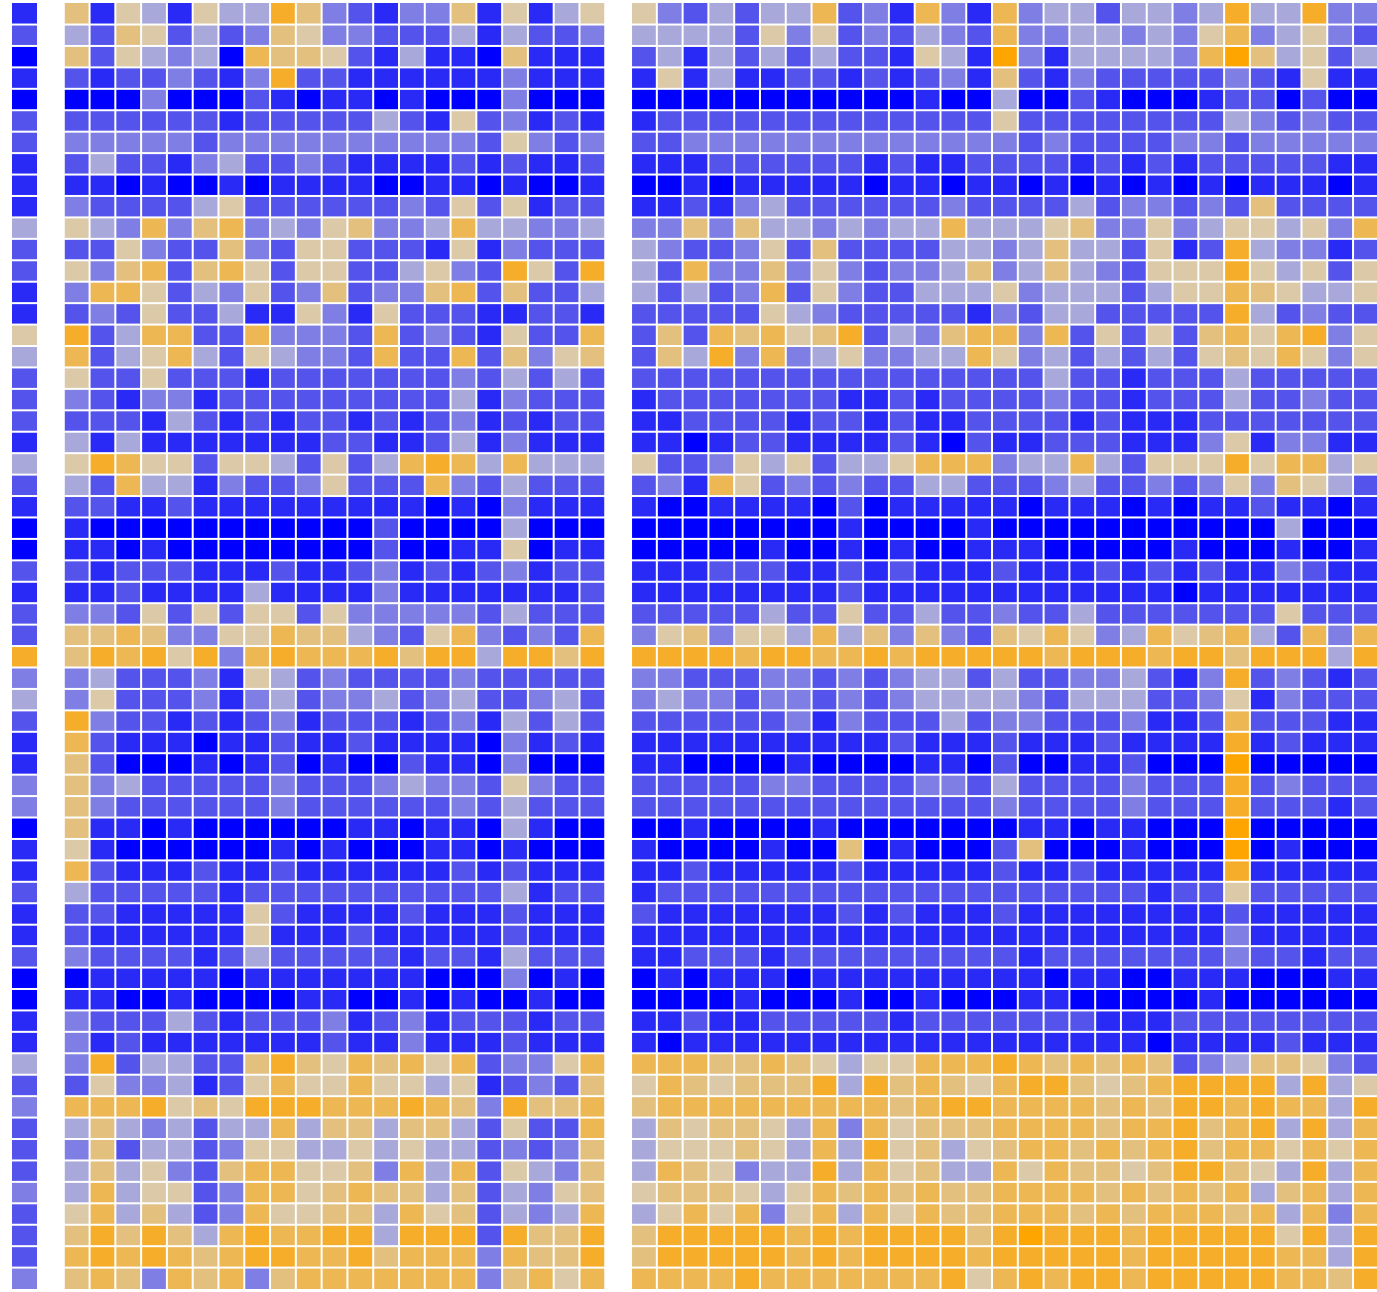

cg18867480  
cg24249411  
cg01583131  
cg10022526  
cg06046431  
cg11718030  
cg15462887  
cg25457956  
cg14589148  
cg03167496  
cg16257091  
cg01642653  
cg02527472  
cg27351358  
cg07704699  
cg04106006  
cg10635145  
cg06684850  
cg01225698  
cg06816235  
cg25412831  
cg26949694  
cg24650785  
cg22043168  
cg05733135  
cg13974632  
cg04481212  
cg21010859  
cg17413943  
cg11806762  
cg02613510  
cg24065044  
cg01636003  
cg26840770  
cg24377657  
cg06991510  
cg05218375  
cg23497217  
cg15688670  
cg11241206  
cg20340655  
cg04672351  
cg25328597  
cg08362738  
cg15710245  
cg23947039  
cg15313332  
cg25962210  
cg27193031  
cg20108357  
cg18595174  
cg18354203  
cg15014679  
cg14291693  
cg07238832  
cg05189570  
cg23426002  
cg06388004  
cg01418645  
cg06979684

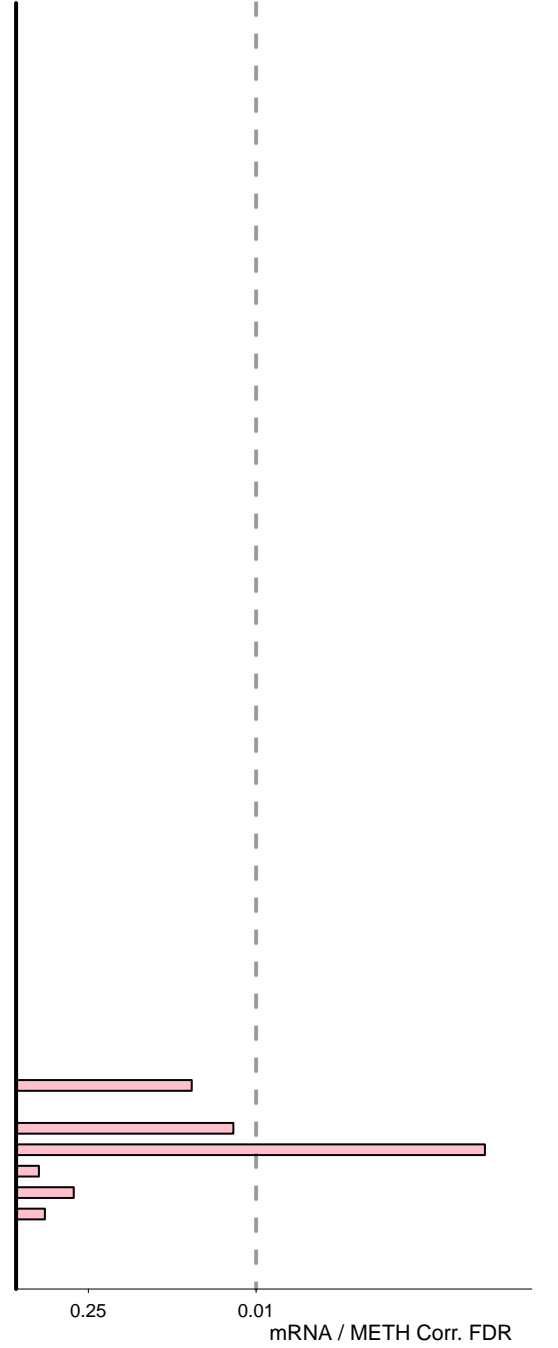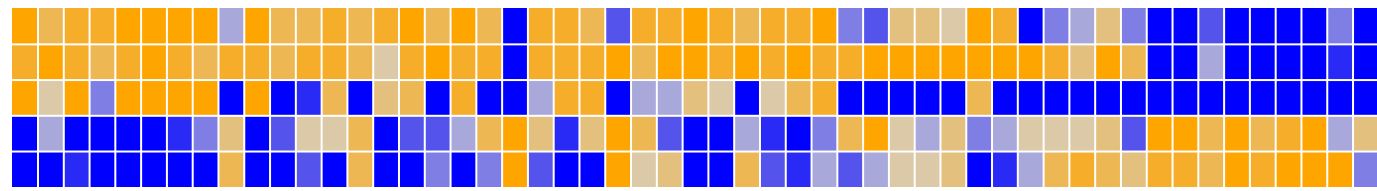

MITF  
SOX10  
TRPM1  
ZEB1  
AXL

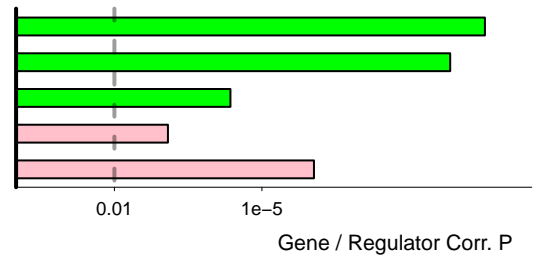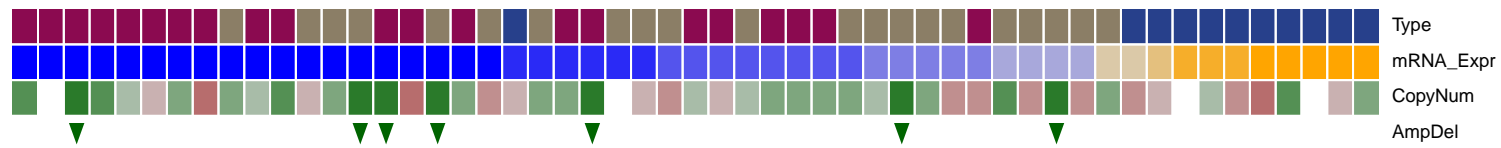

S2374  
S2667  
S2330  
S2373  
S2391  
S2400  
S2521  
S2765  
S2650  
S2408  
S2761  
S2333  
S2596  
S2423  
S2357  
S2406  
S2392  
S2216  
S2380  
S2770A  
S2247  
S2510  
S2379  
S2350  
S2381  
S2097  
S2279  
S2189  
S2410  
S2668  
S2508  
S2320  
S2645  
S2495  
S2767  
S2812  
S2365  
S2718  
S2734  
S2549  
S2654  
S2800  
S2153  
S2405  
S2261  
S2470  
S2583  
S2125  
S2338  
S2688  
S2356  
S2731  
S2686



# GBP1

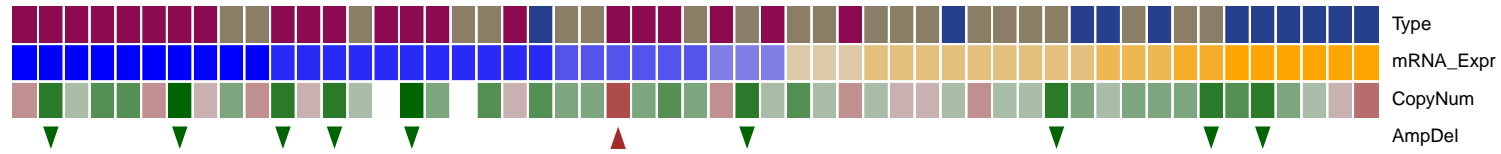

1:89531456  
 1:89530930  
 1:89523325  
 1:89518605

GeneLoc  
 PromoterAssoc  
 CpGIsland

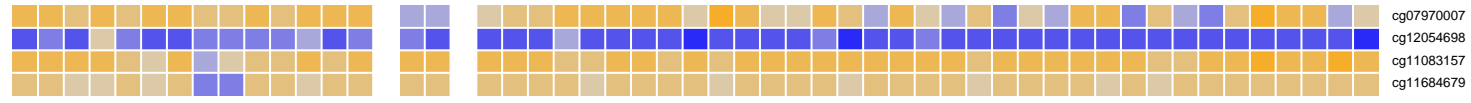

cg07970007  
 cg12054698  
 cg11083157  
 cg11684679

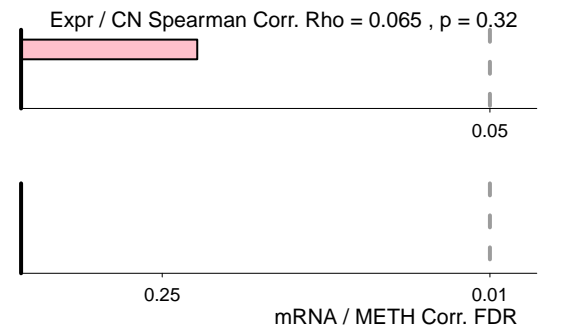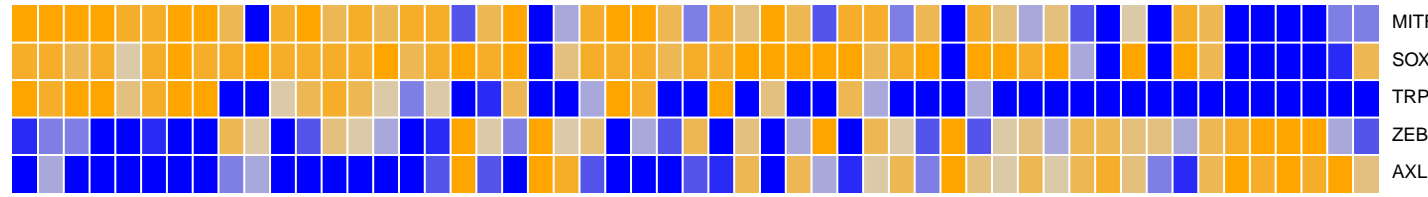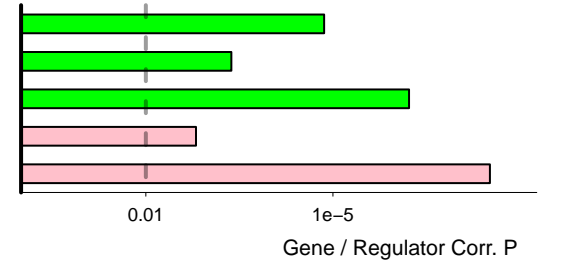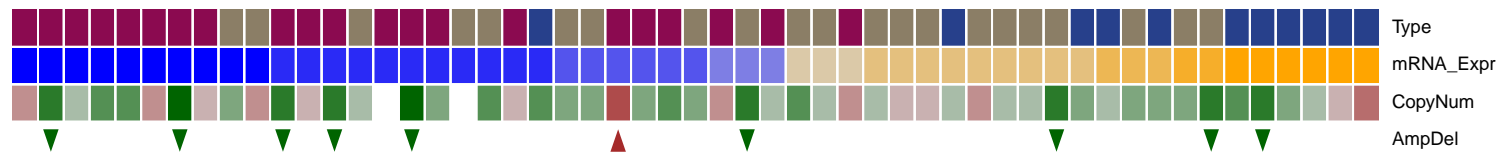

S2521  
 S2320  
 S2765  
 S2391  
 S2357  
 S2510  
 S2400  
 S2374  
 S2380  
 S2549  
 S2189  
 S2406  
 S2379  
 S2596  
 S2667  
 S2373  
 S2668  
 S2350  
 S2333  
 S2718  
 S2770A  
 S2800  
 S2247  
 S2408  
 S2216  
 S2761  
 S2645  
 S2330  
 S2153  
 S2279  
 S2410  
 S2495  
 S2508  
 S2381  
 S2654  
 S2392  
 S2356  
 S2097  
 S2767  
 S2650  
 S2812  
 S2583  
 S2338  
 S2365  
 S2686  
 S2734  
 S2423  
 S2688  
 S2470  
 S2125  
 S2261  
 S2731  
 S2405

# SRPX2

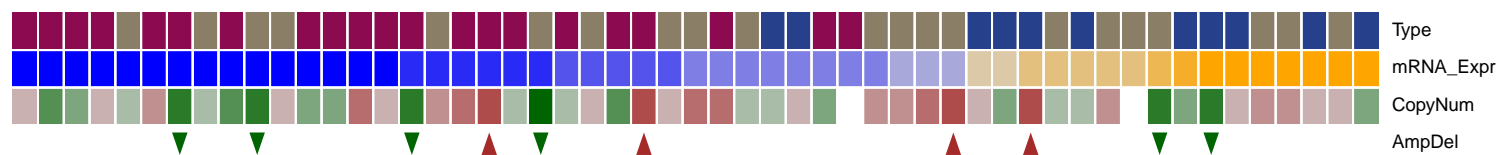

X: 99898347  
 X: 99898590  
 X: 99898921  
 X: 99898930  
 X: 99899134  
 X: 99899345  
 X: 99899348  
 X: 99899378  
 X: 99917334

GeneLoc  
 PromoterAssoc  
 CpIsland

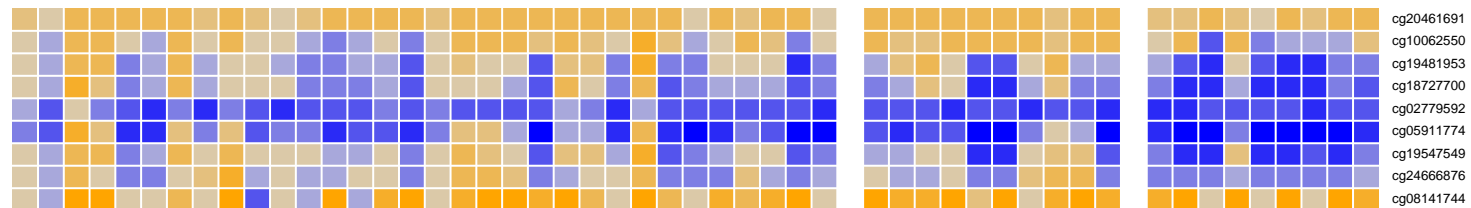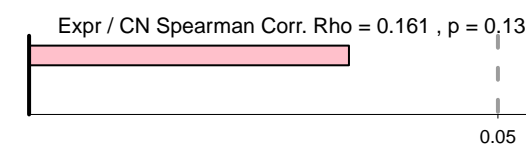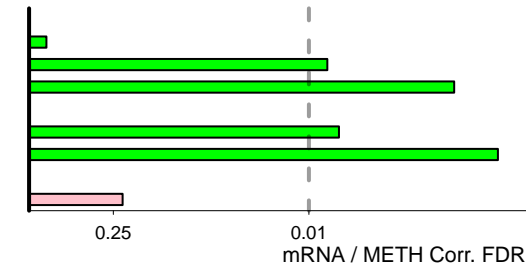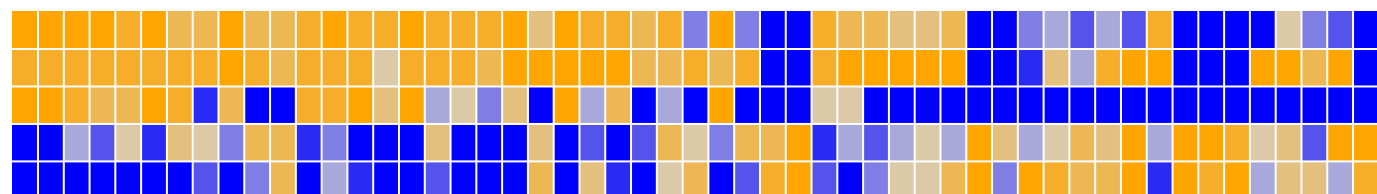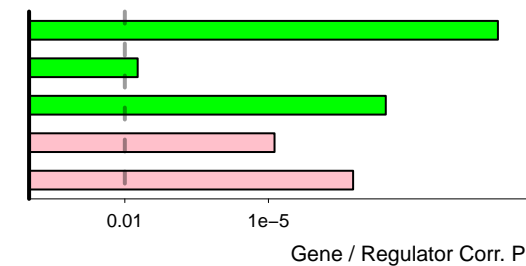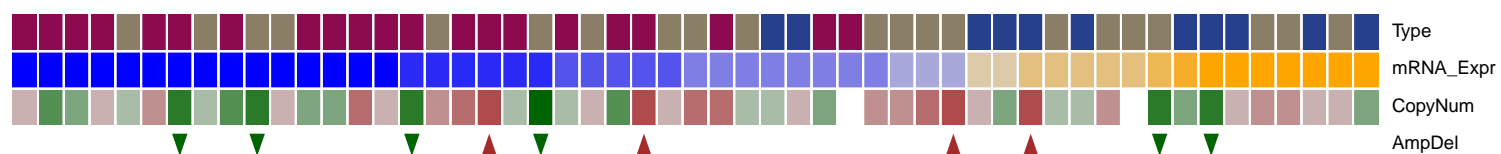

S2391  
 S2374  
 S2216  
 S2406  
 S2596  
 S2521  
 S2379  
 S2333  
 S2718  
 S2380  
 S2423  
 S2510  
 S2320  
 S2330  
 S2357  
 S2408  
 S2247  
 S2189  
 S2373  
 S2279  
 S2153  
 S2400  
 S2097  
 S2508  
 S2761  
 S2381  
 S2654  
 S2765  
 S2645  
 S2338  
 S2338  
 S2770A  
 S2668  
 S2667  
 S2392  
 S2812  
 S2767  
 S2410  
 S2125  
 S2686  
 S2731  
 S2800  
 S2583  
 S2650  
 S2350  
 S2734  
 S2356  
 S2470  
 S2688  
 S2549  
 S2365  
 S2405  
 S2495  
 S2261

# SMAGP

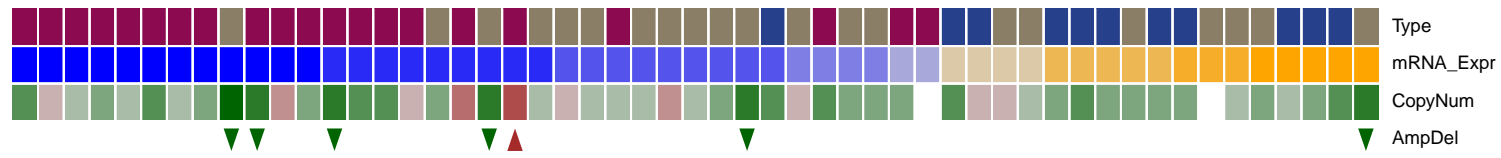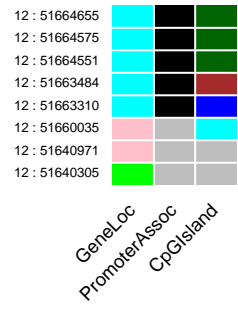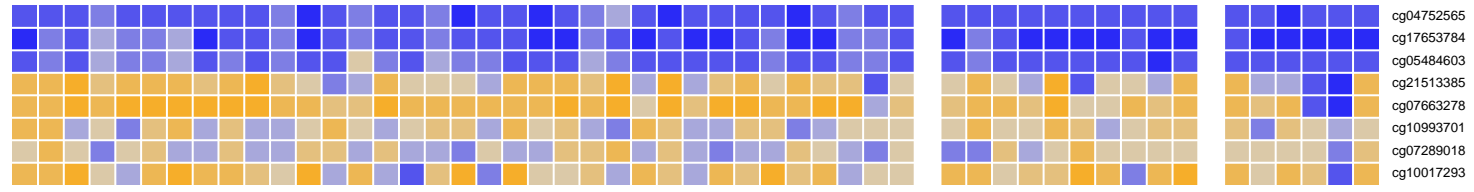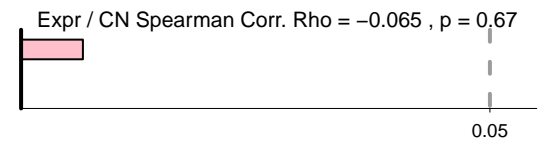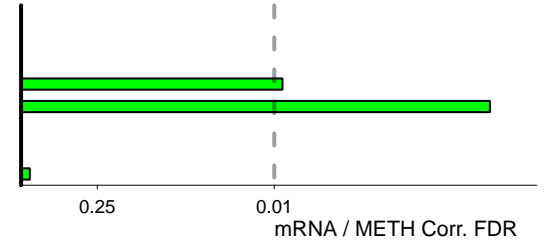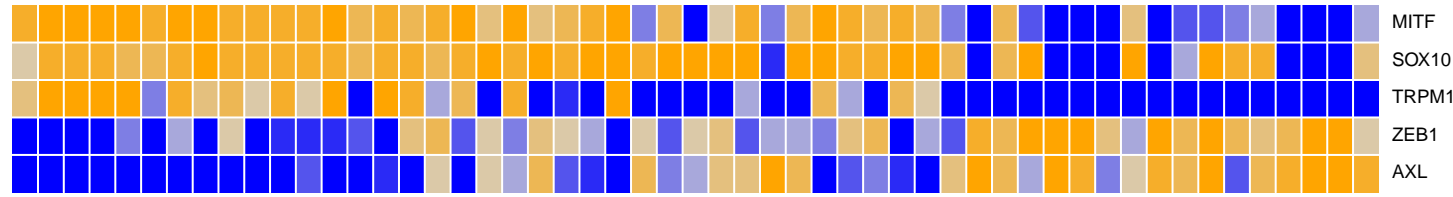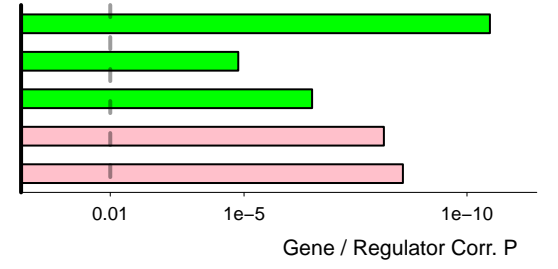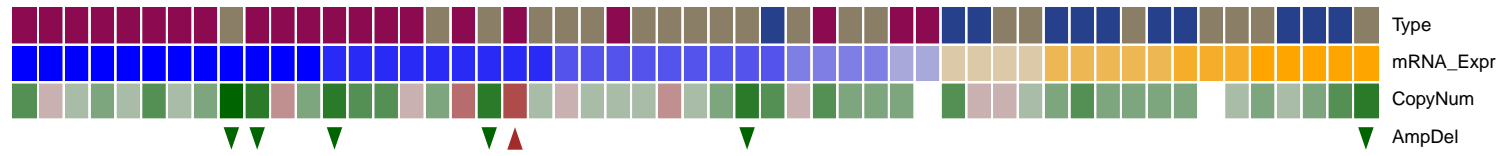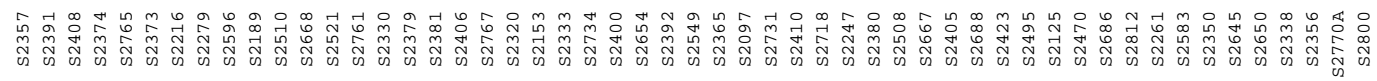

# EXT1

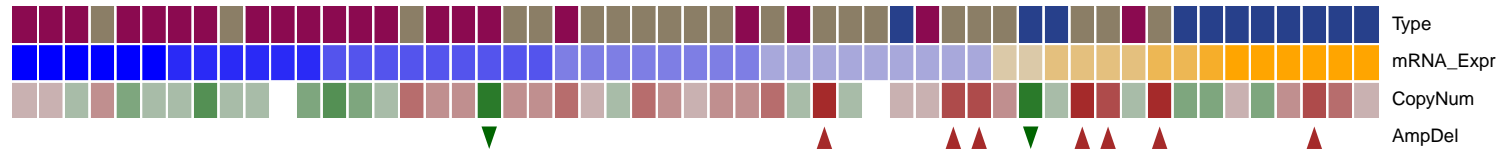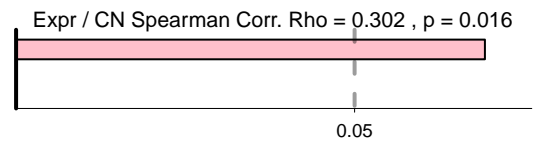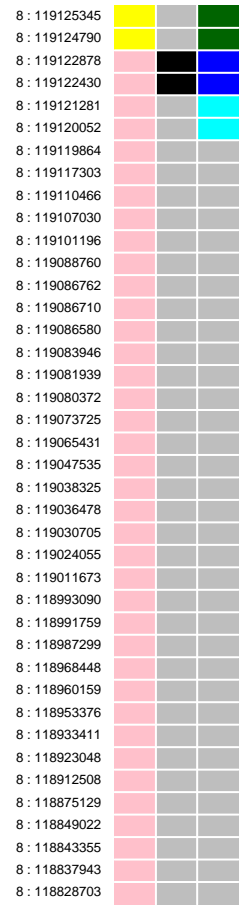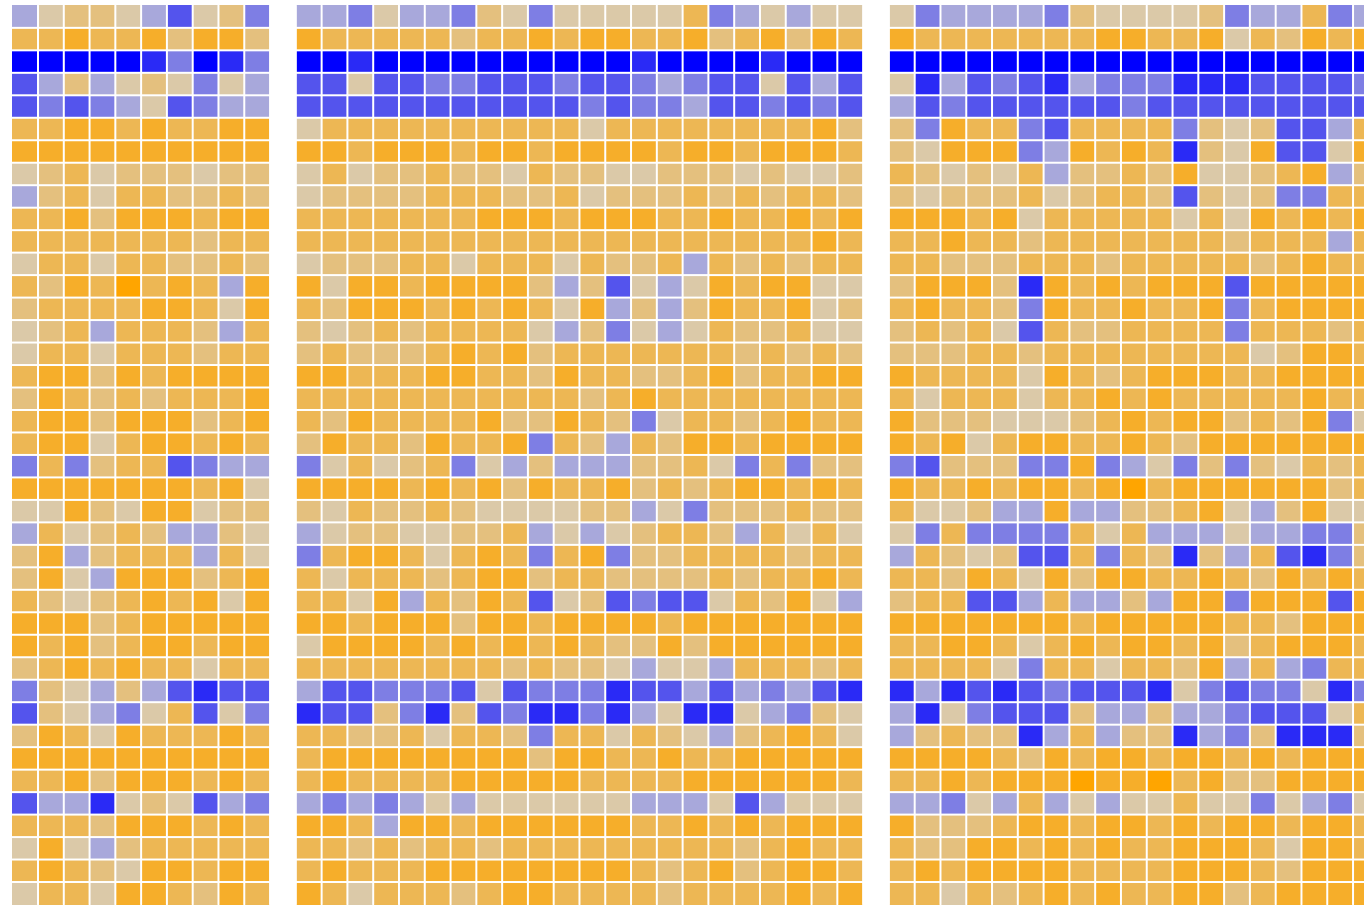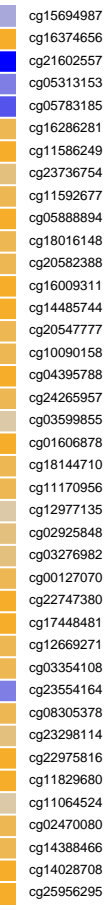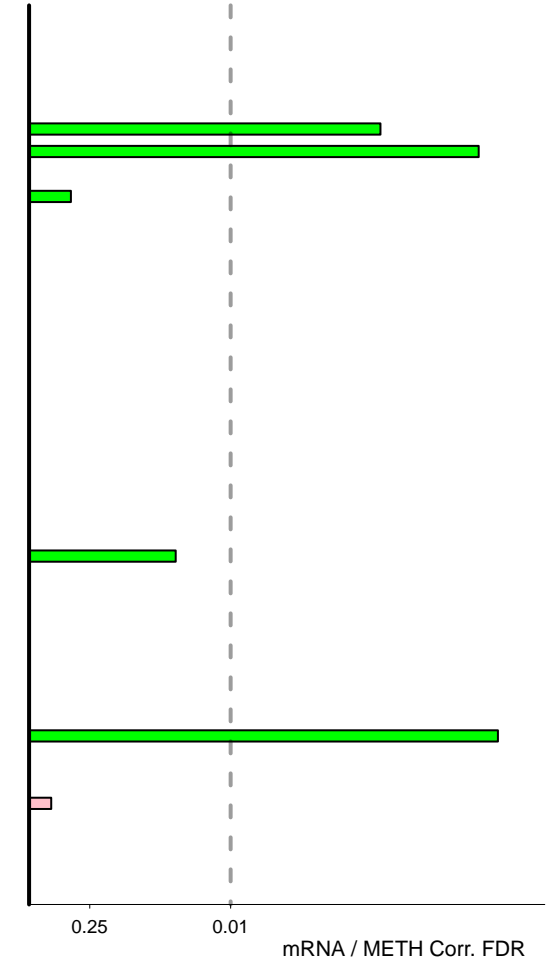

GeneLoc  
PromoterAssoc  
CpGIsland

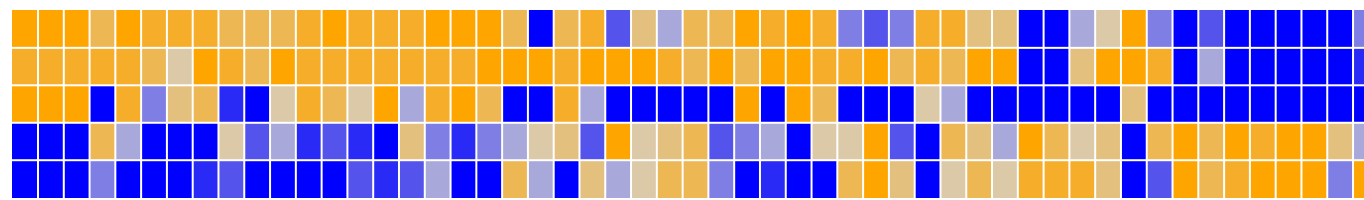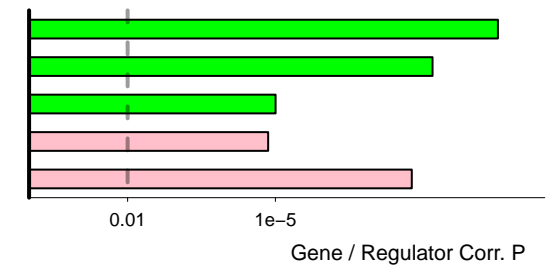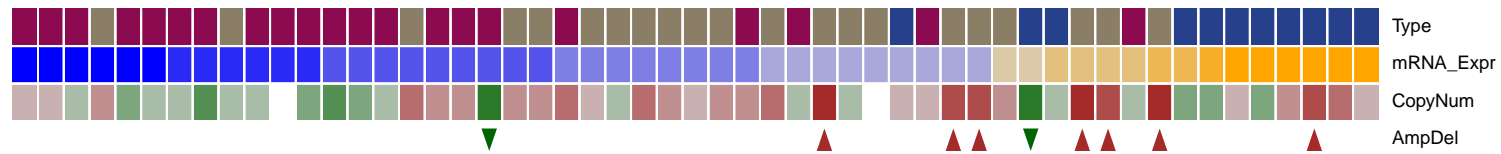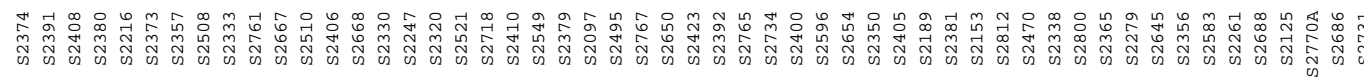

# TMEM158

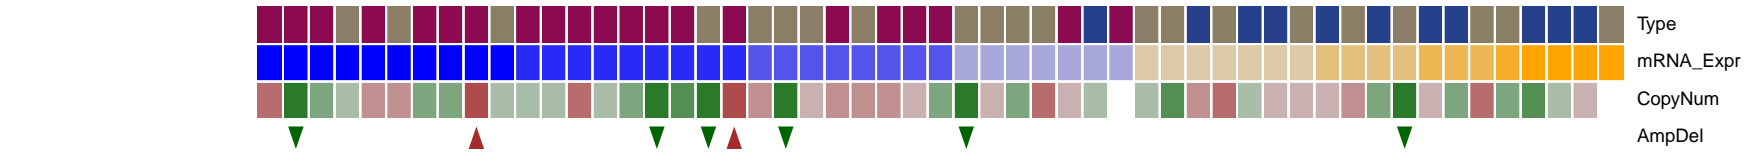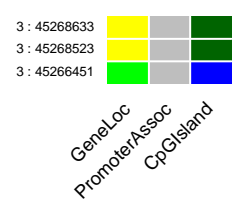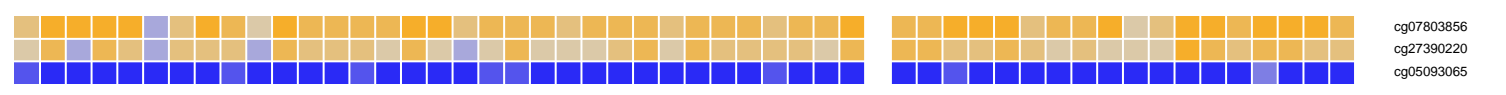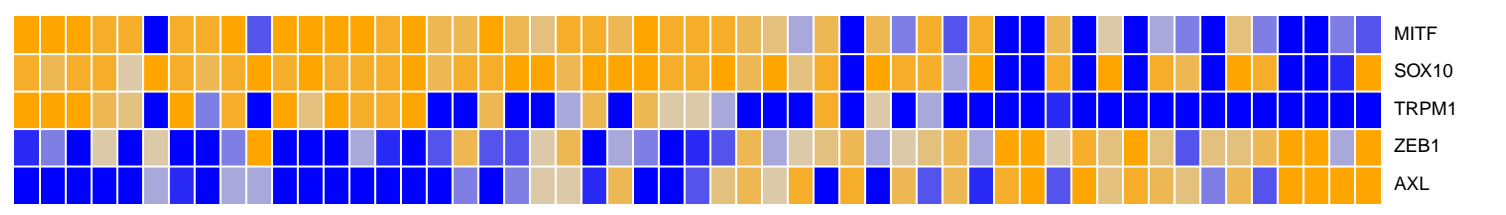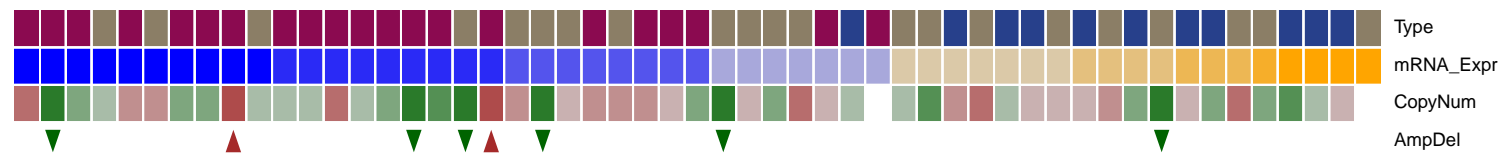

- S2521
- S2765
- S2374
- S2596
- S2357
- S2549
- S2330
- S2373
- S2320
- S2495
- S2408
- S2279
- S2391
- S2510
- S2400
- S2761
- S2380
- S2406
- S2392
- S2767
- S2381
- S2508
- S2410
- S2718
- S2189
- S2668
- S2097
- S2423
- S2812
- S2800
- S2379
- S2338
- S2667
- S2654
- S2247
- S2583
- S2734
- S2470
- S2125
- S2333
- S2688
- S2365
- S2261
- S2650
- S2405
- S2686
- S2153
- S2645
- S2770A
- S2356
- S2731
- S2350

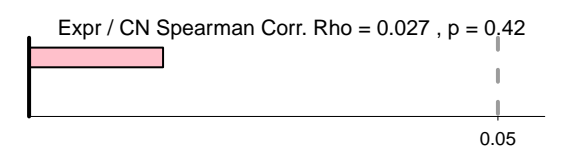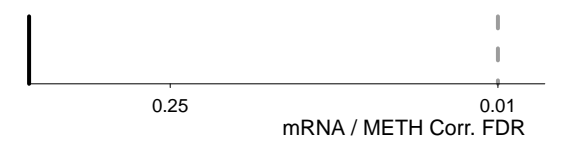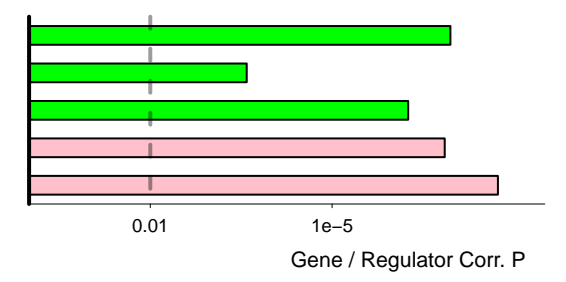

# AFAP1

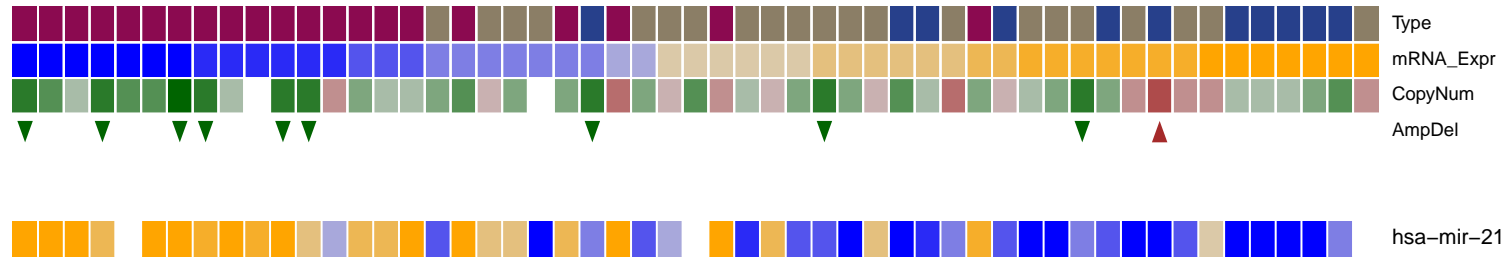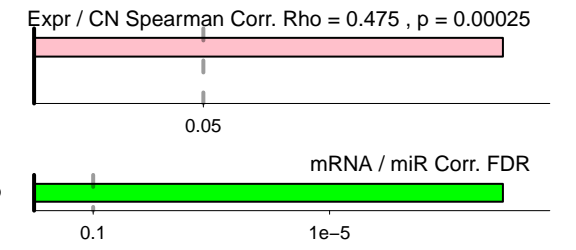

- 4 : 7942031
- 4 : 7942020
- 4 : 7941894
- 4 : 7941852
- 4 : 7941837
- 4 : 7941823
- 4 : 7940579
- 4 : 7940426
- 4 : 7940389
- 4 : 7940375
- 4 : 7940128
- 4 : 7939940
- 4 : 7938304
- 4 : 7925539
- 4 : 7920885
- 4 : 7918691
- 4 : 7912384
- 4 : 7906254
- 4 : 7903970
- 4 : 7894203
- 4 : 7893062
- 4 : 7887609
- 4 : 7878384
- 4 : 7872993
- 4 : 7870292
- 4 : 7863560
- 4 : 7862659
- 4 : 7862655
- 4 : 7862646
- 4 : 7857771
- 4 : 7846669
- 4 : 7844982
- 4 : 7844552
- 4 : 7844018
- 4 : 7822935
- 4 : 7814047
- 4 : 7813911
- 4 : 7813791
- 4 : 7813475
- 4 : 7812988
- 4 : 7812736
- 4 : 7810640
- 4 : 7807438
- 4 : 7805952
- 4 : 7803013
- 4 : 7802545
- 4 : 7802389
- 4 : 7802347
- 4 : 7802238
- 4 : 7801922
- 4 : 7801337
- 4 : 7799686
- 4 : 7799253
- 4 : 7799191
- 4 : 7789738
- 4 : 7789542
- 4 : 7789881
- 4 : 7788342
- 4 : 7788250
- 4 : 7788198
- 4 : 7787983
- 4 : 7787960
- 4 : 7787944
- 4 : 7783873
- 4 : 7780490
- 4 : 7777798
- 4 : 7774950
- 4 : 7774768
- 4 : 7774727
- 4 : 7774510
- 4 : 7774382
- 4 : 7770639
- 4 : 7770554
- 4 : 7770069
- 4 : 7769958
- 4 : 7768660
- 4 : 7768575
- 4 : 7768357
- 4 : 7768162
- 4 : 7768040
- 4 : 7765909
- 4 : 7765033
- 4 : 7764996
- 4 : 7764949
- 4 : 7763703
- 4 : 7763618
- 4 : 7762705
- 4 : 7762596
- 4 : 7761009

GeneLoc  
PromoterAssoc  
CpGIsland

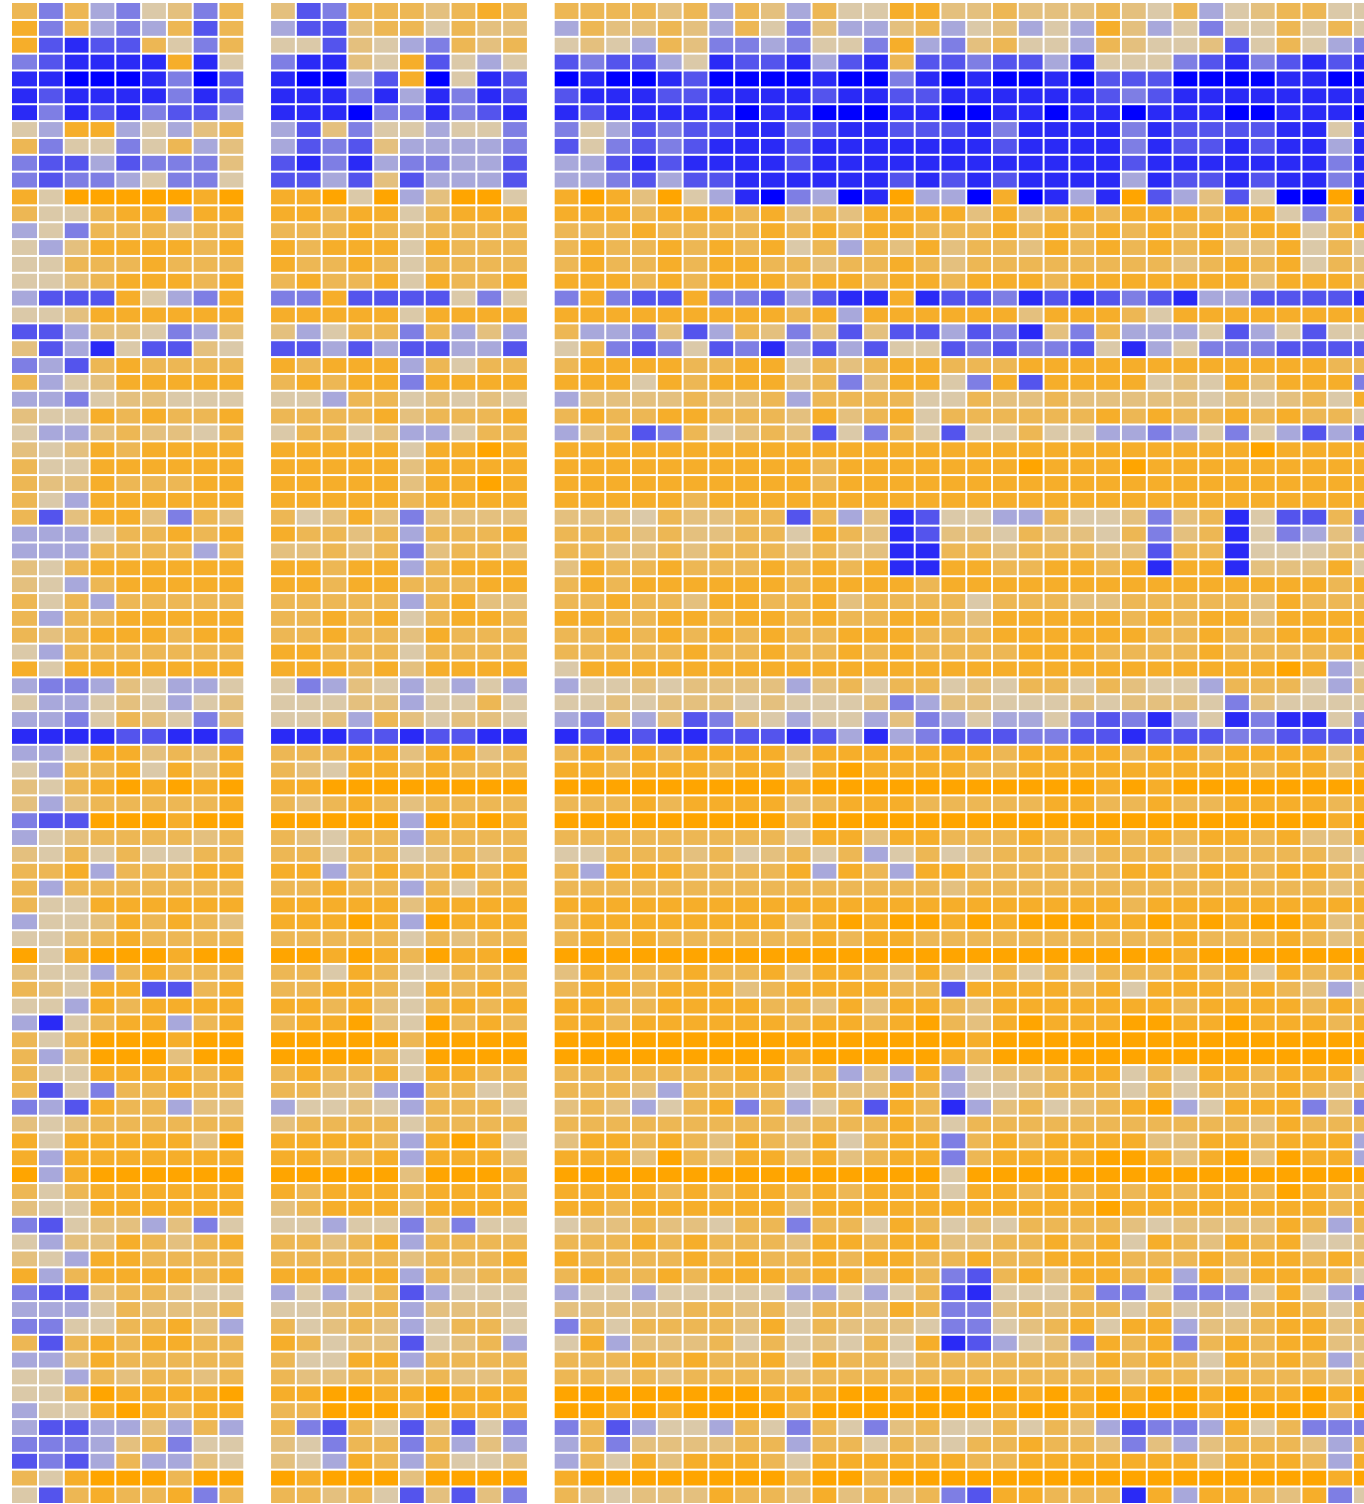

- cg18688746
- cg19702703
- cg10028549
- cg19564367
- cg03204605
- cg15957394
- cg22079161
- cg20708173
- cg14692106
- cg18619267
- cg25003275
- cg18085176
- cg13534536
- cg03506316
- cg07406289
- cg22870092
- cg19473989
- cg07484065
- cg12728606
- cg11808936
- cg01833057
- cg24250820
- cg23750206
- cg00151271
- cg04757063
- cg19509663
- cg02871827
- cg10135894
- cg06651522
- cg23413369
- cg16215705
- cg25912009
- cg263394788
- cg02614549
- cg20581021
- cg06068179
- cg18400079
- cg02895669
- cg20312457
- cg06758191
- cg24358467
- cg24377560
- cg22430985
- cg21786465
- cg20619104
- cg19277389
- cg24716420
- cg11932225
- cg20356136
- cg20187572
- cg00251875
- cg19726599
- cg22013070
- cg18459475
- cg14585558
- cg27326882
- cg16199219
- cg25817503
- cg19601530
- cg16005525
- cg27567206
- cg10099518
- cg00313498
- cg00135399
- cg20278503
- cg22161147
- cg20147046
- cg06934132
- cg07109358
- cg20929387
- cg01592387
- cg26167625
- cg18365211
- cg16607898
- cg23894117
- cg00624564
- cg14543780
- cg06158627
- cg17332705
- cg09428868
- cg24848420
- cg24366493
- cg19405718
- cg18375902
- cg27200895
- cg01612656
- cg17270894
- cg17282027
- cg12228123

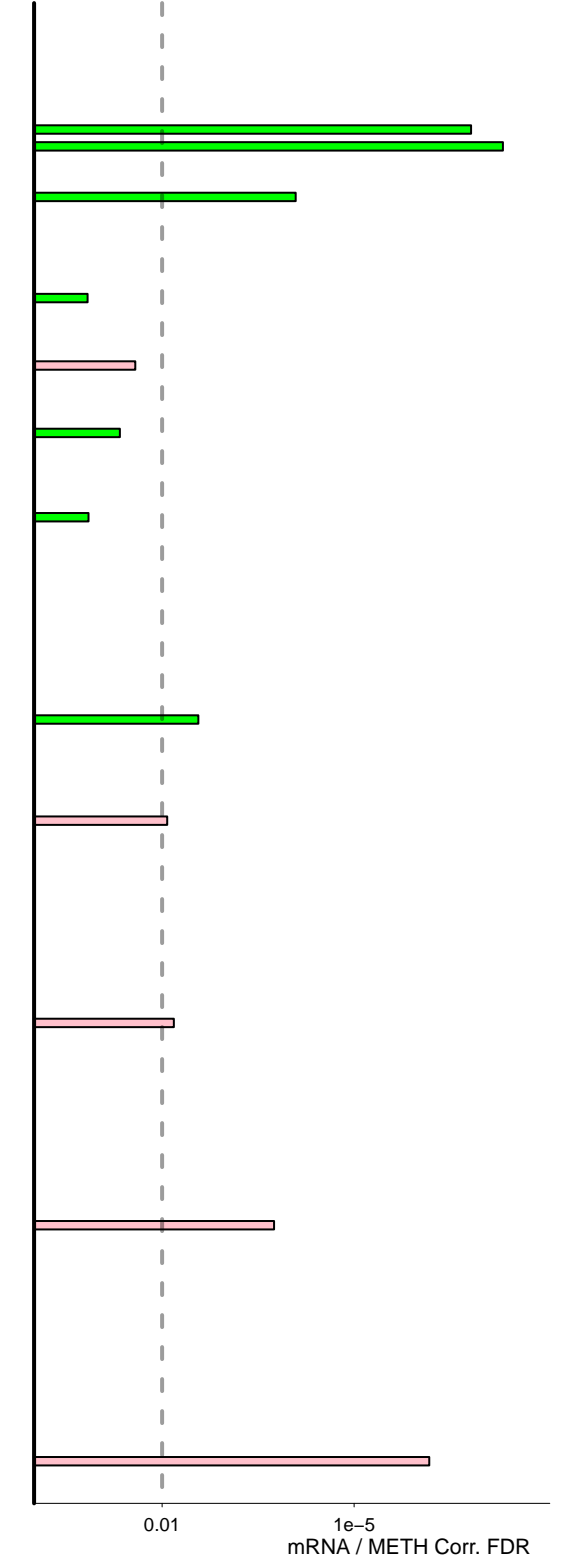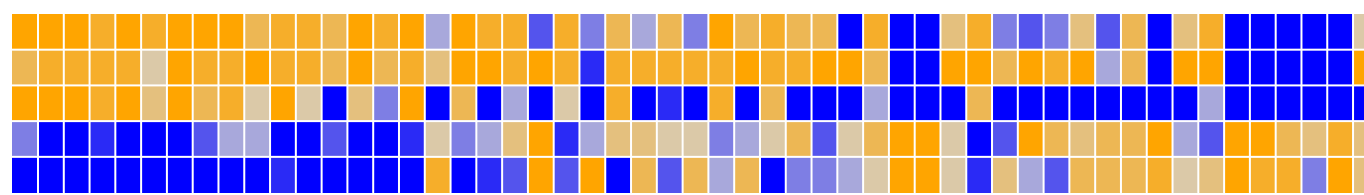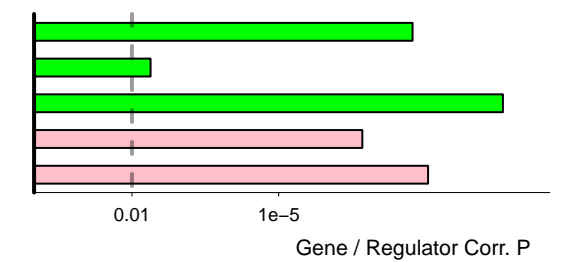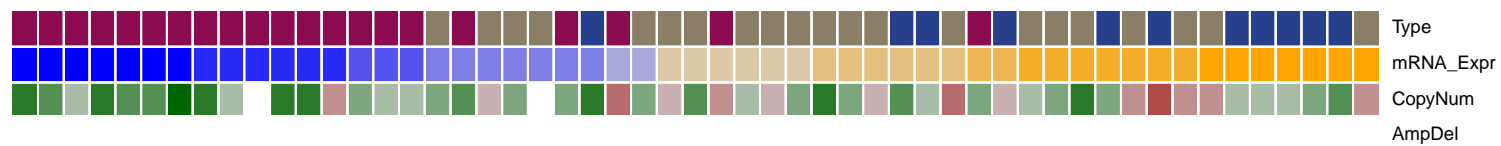

- S2765
- S2374
- S2408
- S2510
- S2391
- S2357
- S2400
- S2406
- S2216
- S2667
- S2330
- S2189
- S2761
- S2279
- S2373
- S2521
- S2800
- S2718
- S2734
- S2247
- S2350
- S2668
- S2731
- S2379
- S2333
- S2654
- S2320
- S2410
- S2596
- S2380
- S2392
- S2549
- S2361
- S2770A
- S2356
- S2767
- S2508
- S2405
- S2495
- S2645
- S2153
- S2583
- S2423
- S2470
- S2812
- S2097
- S2125
- S2261
- S2338
- S2686
- S2688
- S2365

# ITGA2

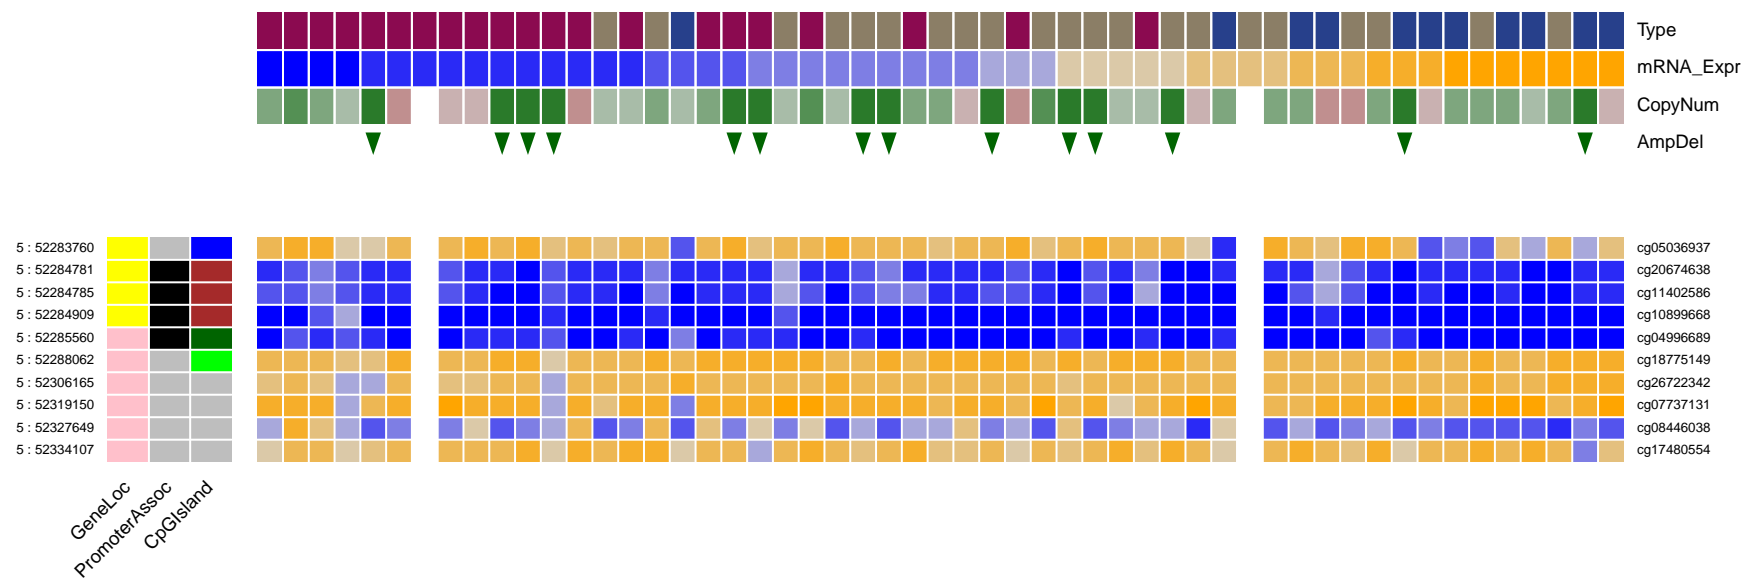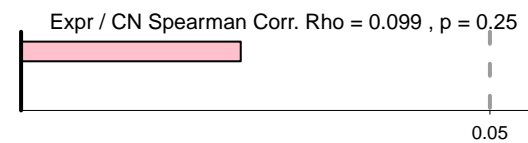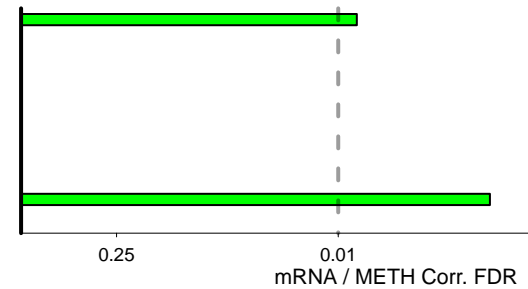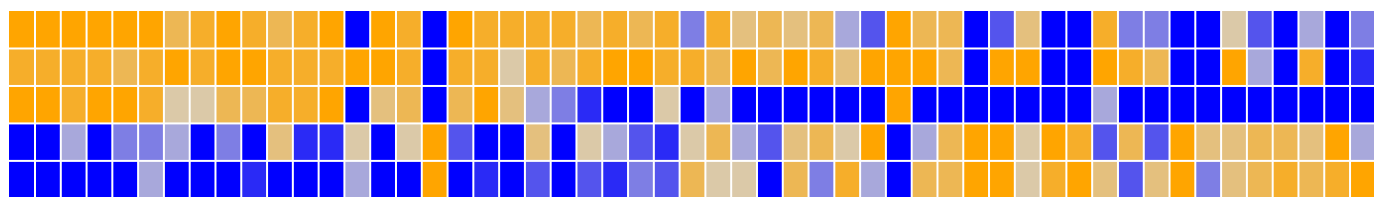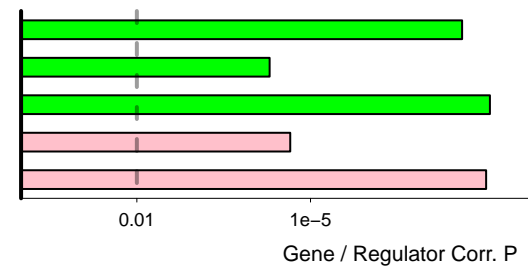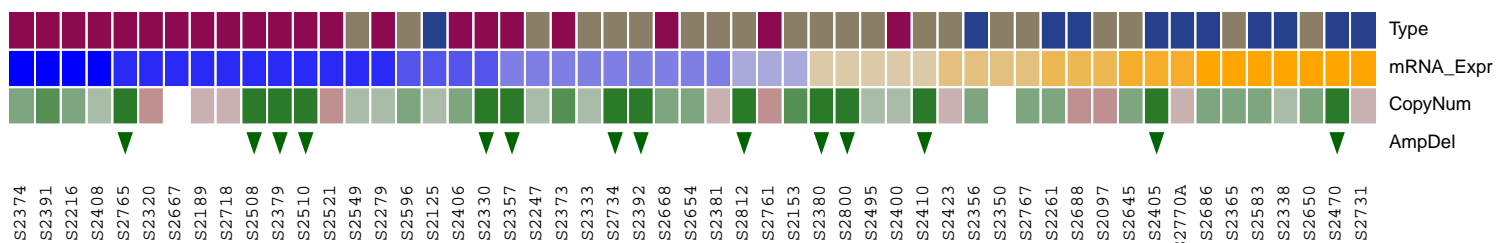

# AKR1C3

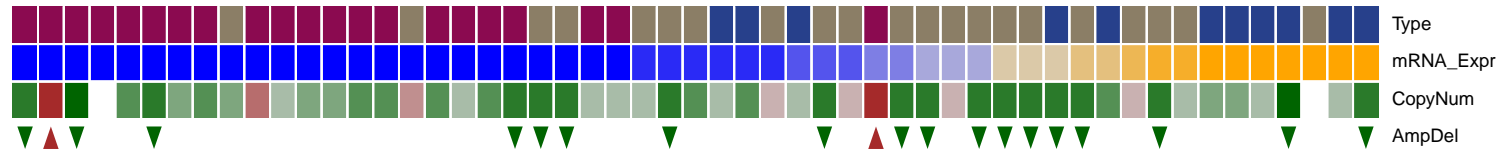

10:5113871  
10:5135453  
10:5136782  
10:5149799

GeneLoc  
PromoterAssoc  
CpGIsland

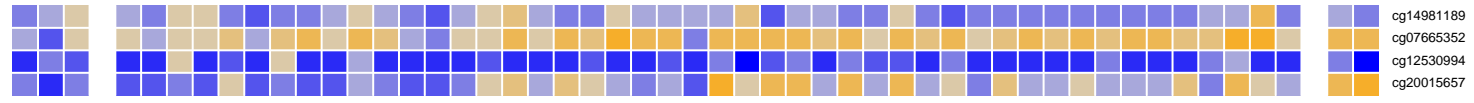

Type  
mRNA\_Expr  
CopyNum  
AmpDel

cg14981189  
cg07665352  
cg12530994  
cg20015657

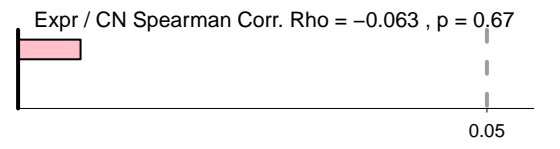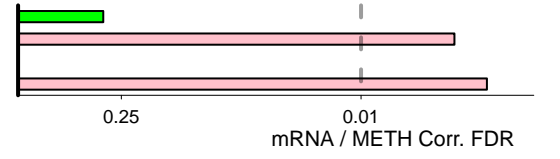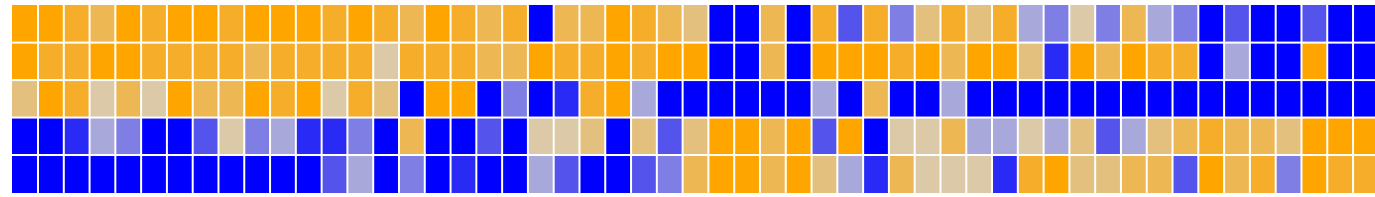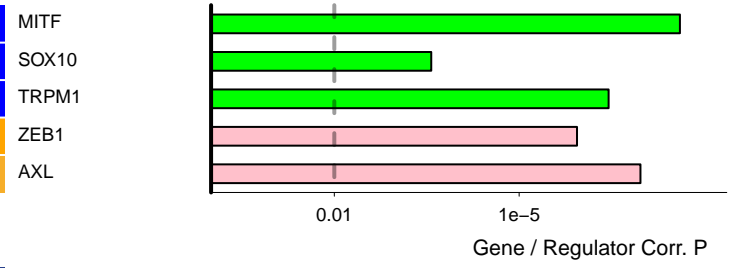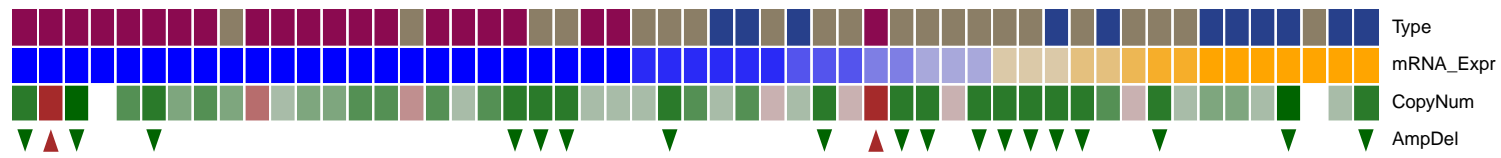

S2279  
S2374  
S2510  
S2667  
S2718  
S2189  
S2391  
S2406  
S2596  
S2765  
S2216  
S2521  
S2668  
S2320  
S2357  
S2380  
S2408  
S2330  
S2761  
S2373  
S2549  
S2333  
S2379  
S2400  
S2247  
S2392  
S2153  
S2356  
S2770A  
S2423  
S2125  
S2097  
S2495  
S2508  
S2654  
S2767  
S2381  
S2812  
S2734  
S2800  
S2731  
S2365  
S2405  
S2410  
S2650  
S2645  
S2688  
S2583  
S2338  
S2686  
S2350  
S2261  
S2470

Type  
mRNA\_Expr  
CopyNum  
AmpDel



# ARL4C

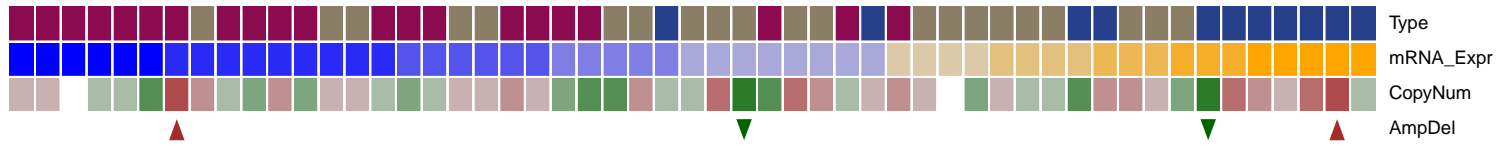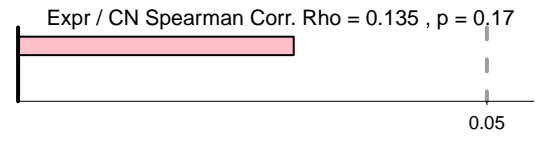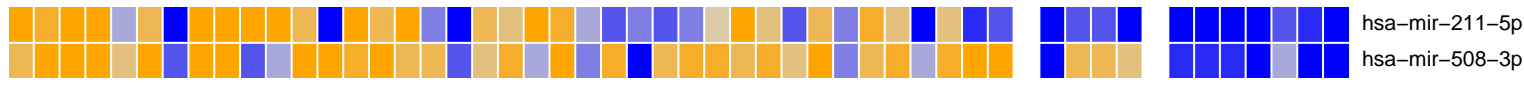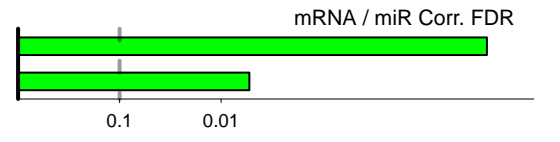

2 : 235406540  
 2 : 235406363  
 2 : 235406291  
 2 : 235406275  
 2 : 235404686  
 2 : 235403218  
 2 : 235403141  
 2 : 235401950

GeneLoc  
 PromoterAssoc  
 CpGIsland

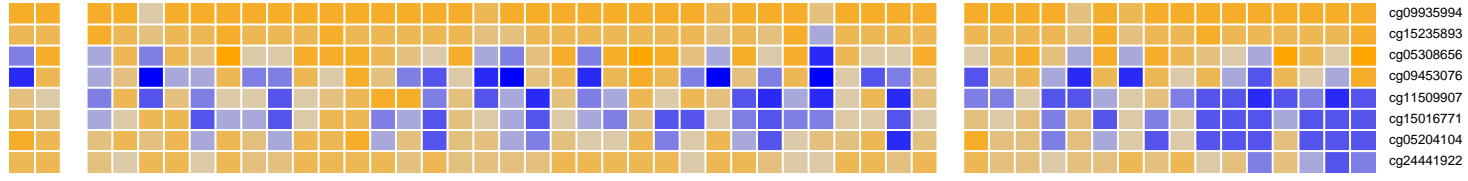

cg09935994  
 cg15235893  
 cg05308656  
 cg09453076  
 cg11509907  
 cg15016771  
 cg05204104  
 cg24441922

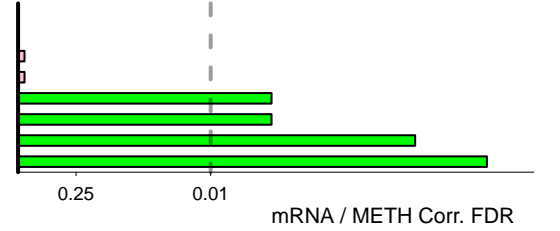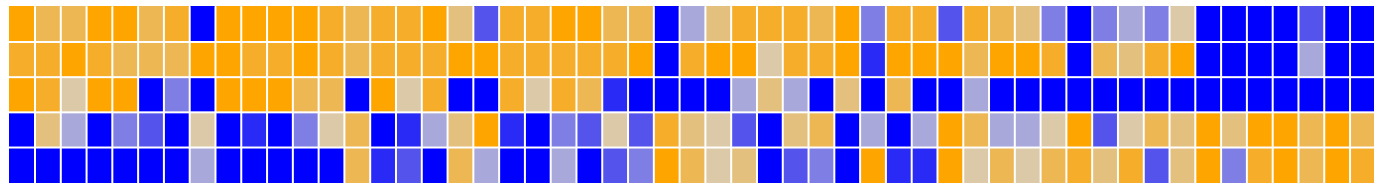

MITF  
 SOX10  
 TRPM1  
 ZEB1  
 AXL

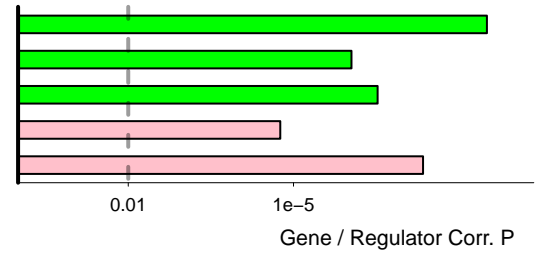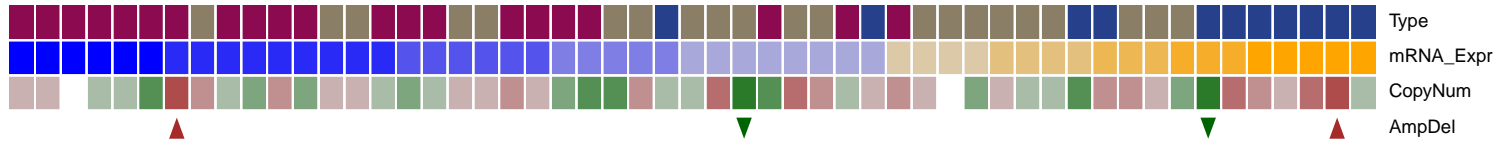

S2391  
 S2379  
 S2667  
 S2408  
 S2765  
 S2761  
 S2373  
 S2549  
 S2400  
 S2521  
 S2374  
 S2718  
 S2596  
 S2423  
 S2668  
 S2216  
 S2153  
 S2495  
 S2510  
 S2189  
 S2320  
 S2406  
 S2333  
 S2392  
 S2688  
 S2650  
 S2767  
 S2097  
 S2357  
 S2247  
 S2380  
 S2279  
 S2731  
 S2508  
 S2734  
 S2350  
 S2381  
 S2410  
 S2812  
 S2654  
 S2261  
 S2405  
 S2800  
 S2645  
 S2365  
 S2125  
 S2686  
 S2470  
 S2770A  
 S2583  
 S2356  
 S2338

# HRH1

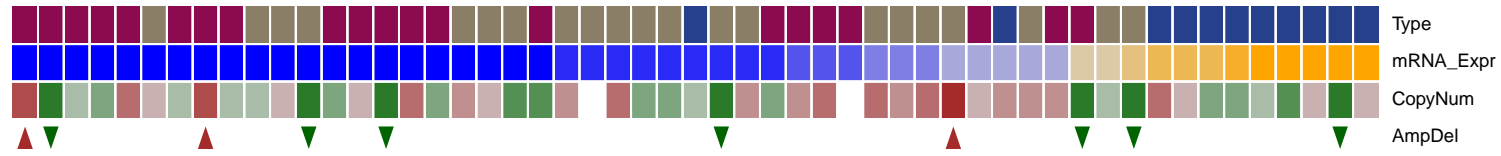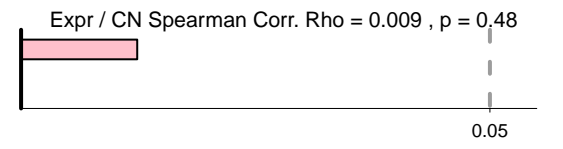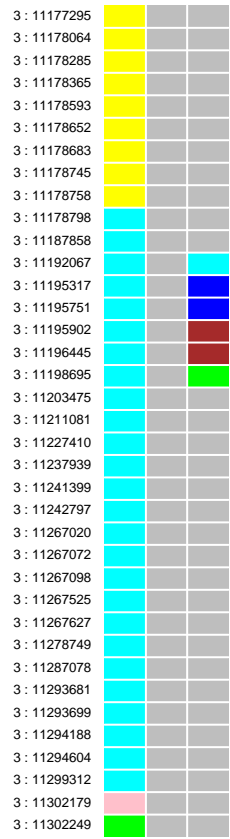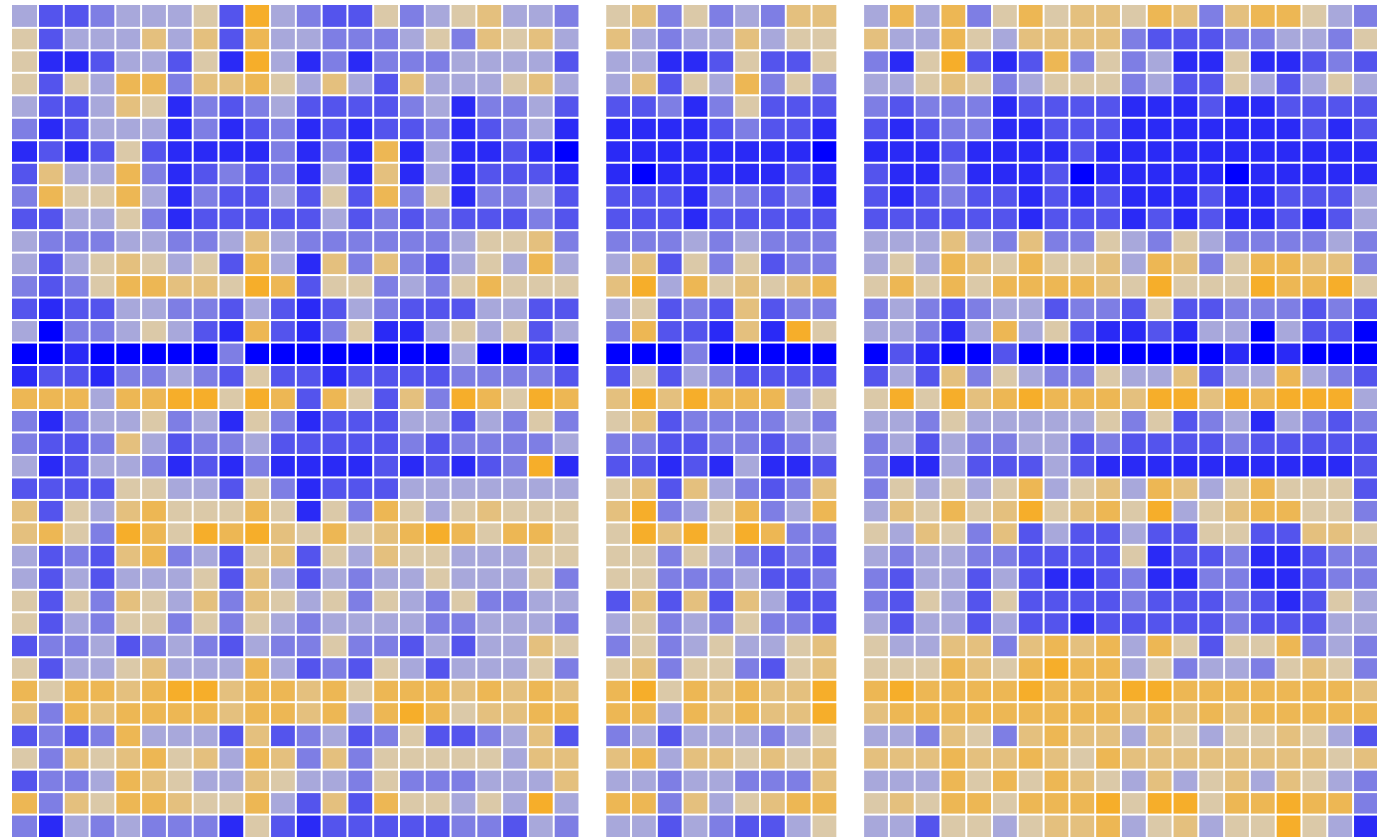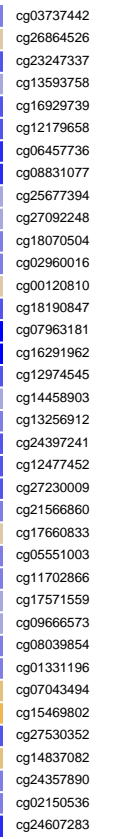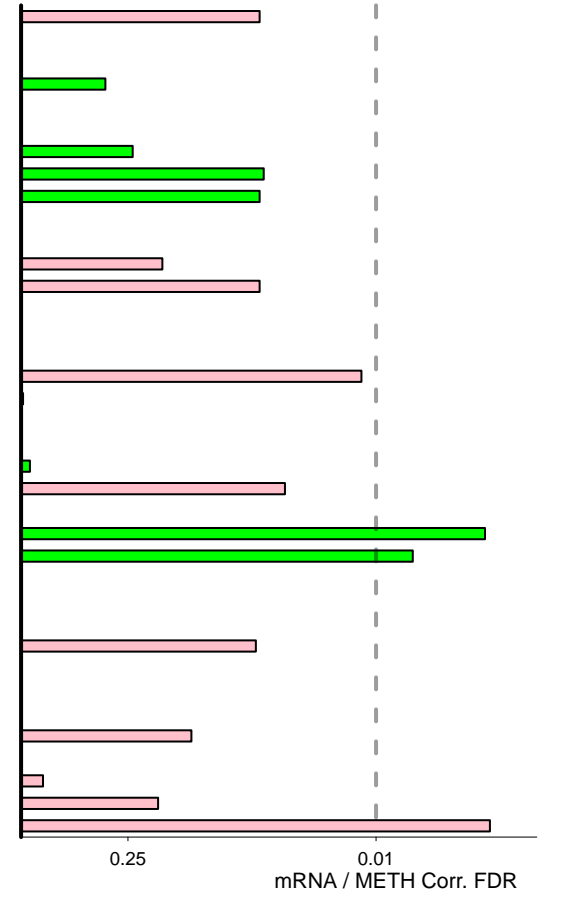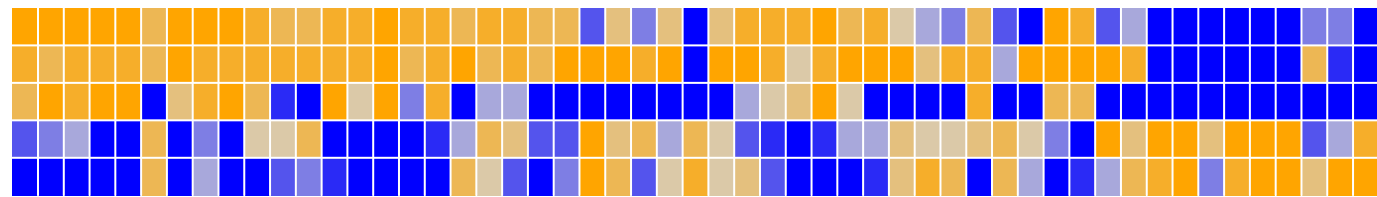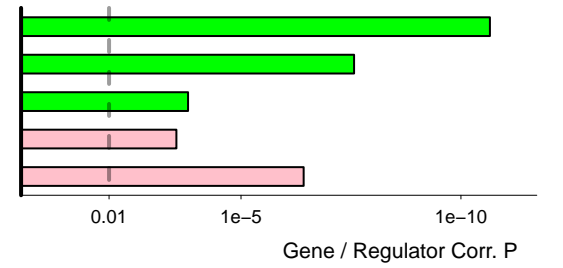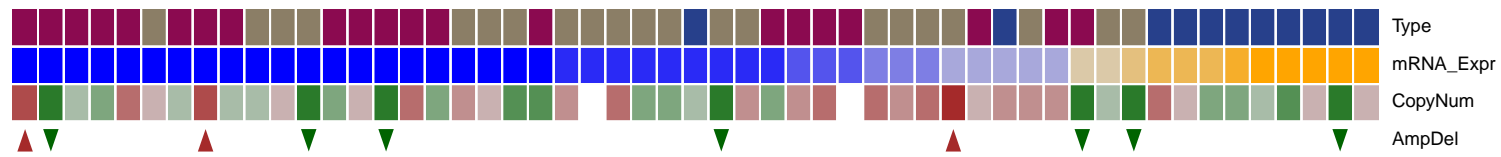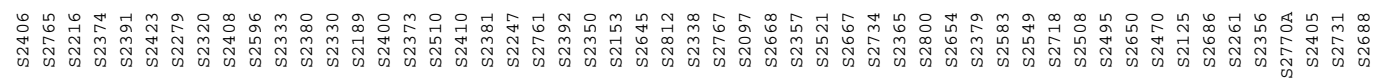

# CLU

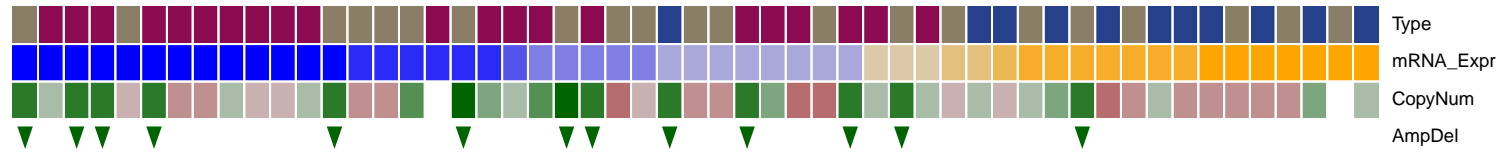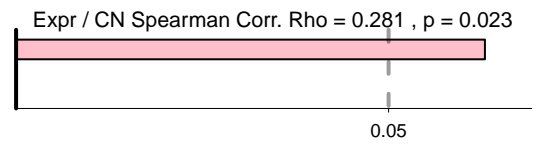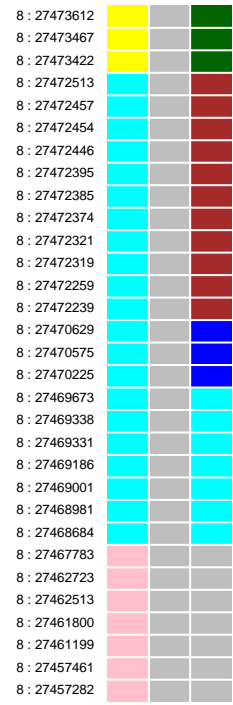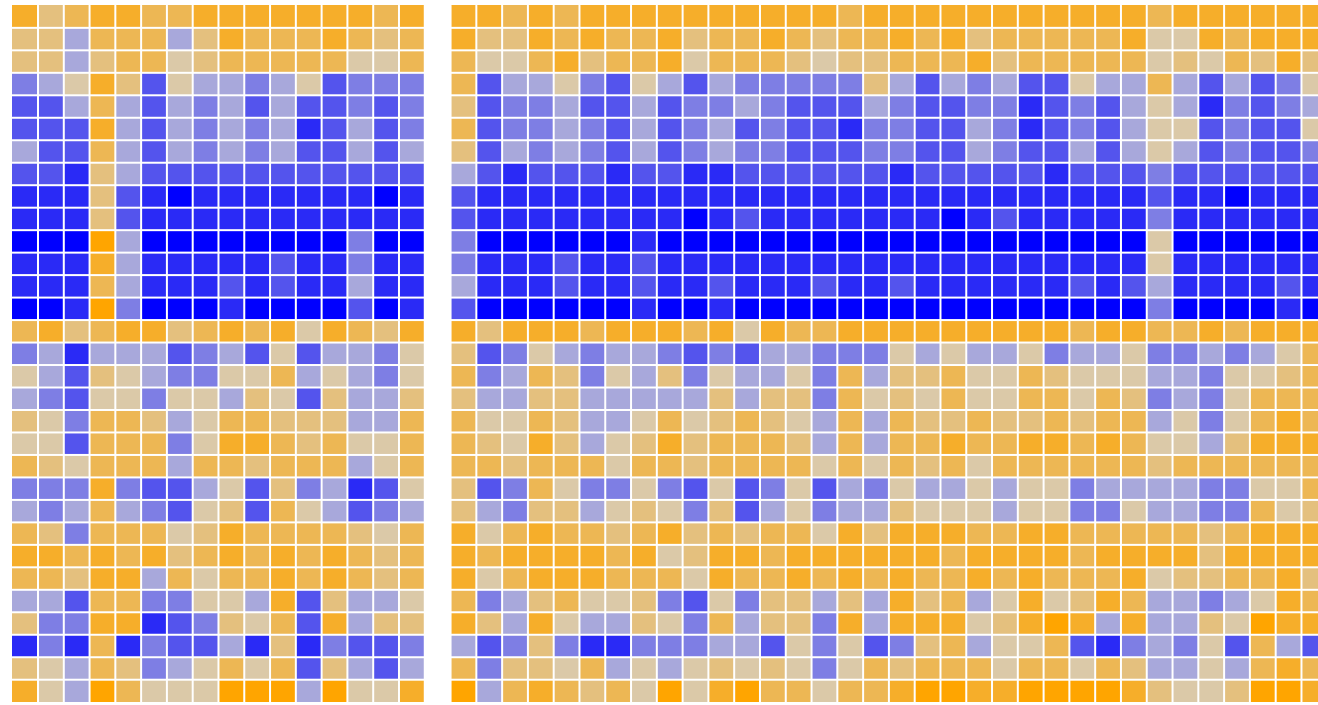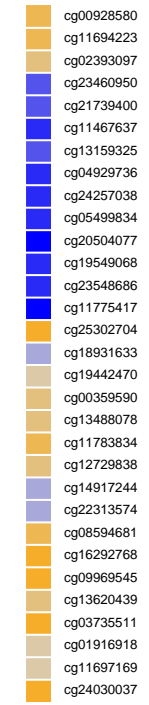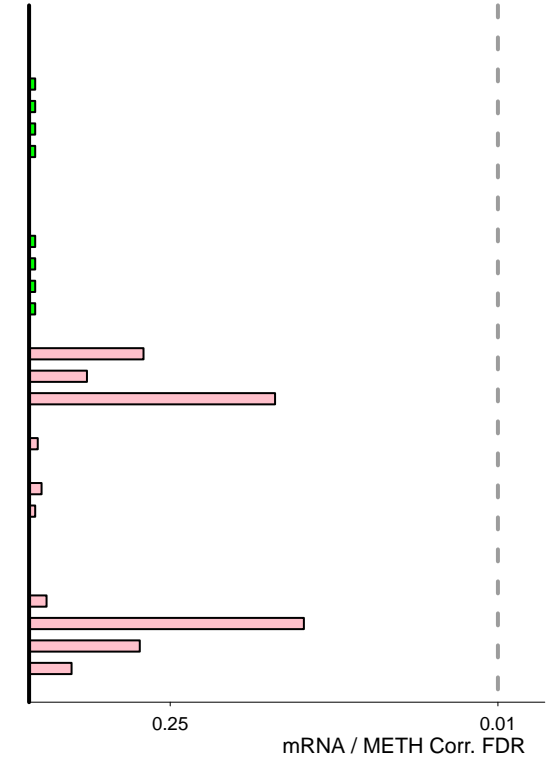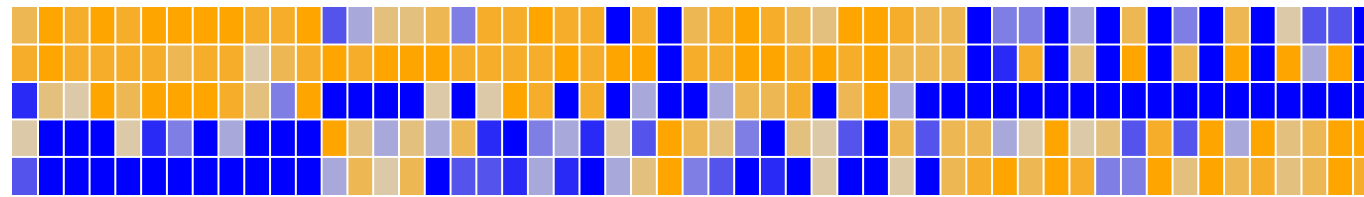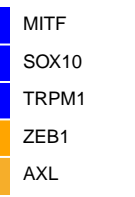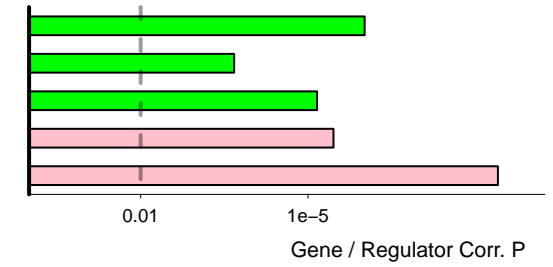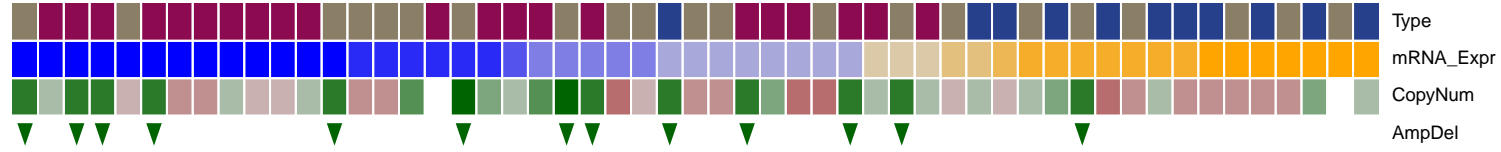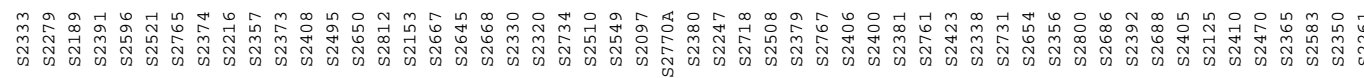

# ADAMTS6

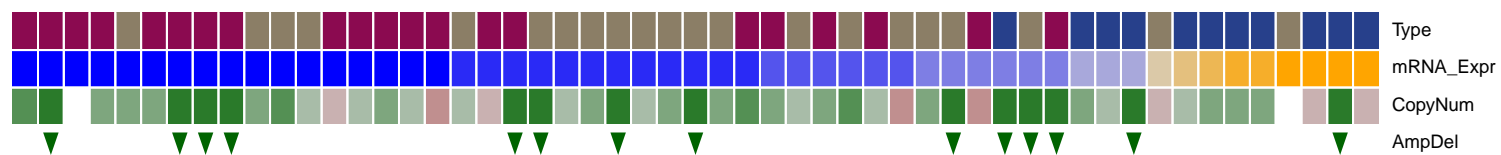

5 : 64666244  
 5 : 64660684  
 5 : 64601816  
 5 : 64578638  
 5 : 64558623  
 5 : 64494334  
 5 : 64486421  
 5 : 64481118  
 5 : 64470134  
 5 : 64446603

GeneLoc  
 PromoterAssoc  
 CpGIsland

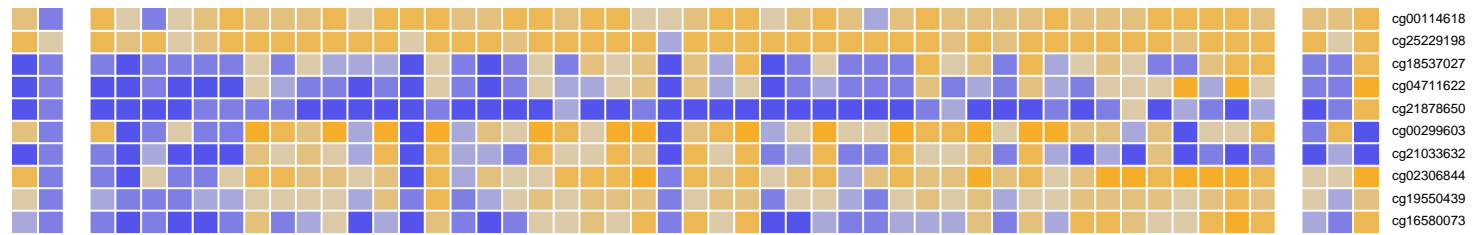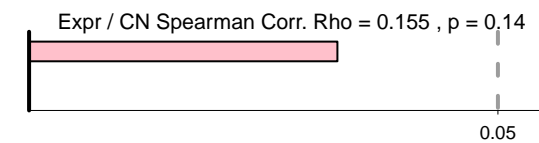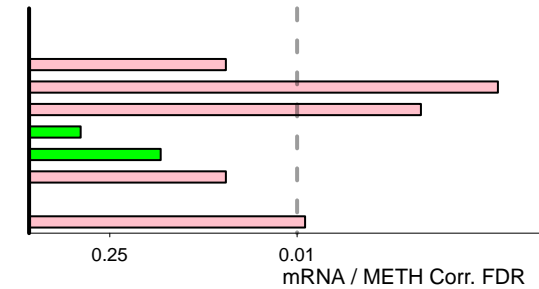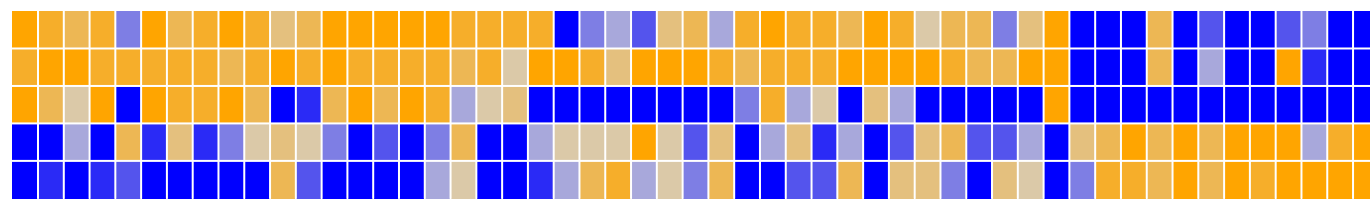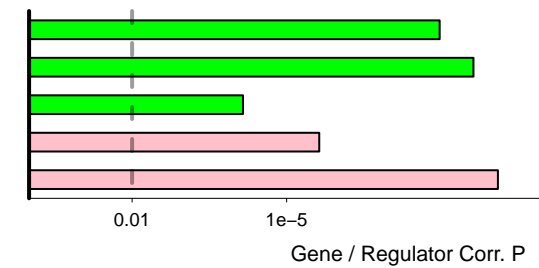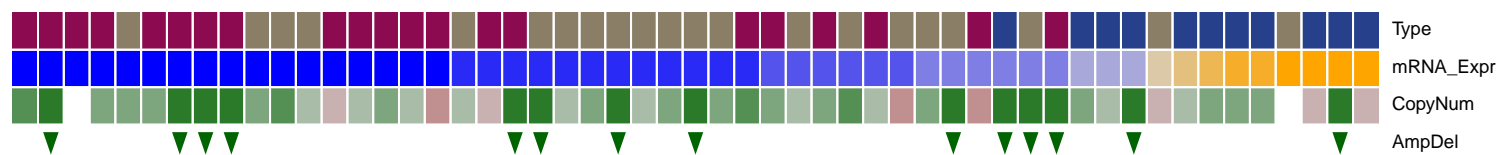

S2391  
 S2508  
 S2667  
 S2330  
 S2645  
 S2521  
 S2379  
 S2510  
 S2765  
 S2596  
 S2153  
 S2333  
 S2718  
 S2374  
 S2406  
 S2408  
 S2320  
 S2381  
 S2189  
 S2357  
 S2734  
 S2549  
 S2654  
 S2800  
 S2495  
 S2767  
 S2392  
 S2650  
 S2373  
 S2216  
 S2247  
 S2668  
 S2410  
 S2279  
 S2097  
 S2365  
 S2380  
 S2761  
 S2405  
 S2812  
 S2400  
 S2686  
 S2338  
 S2470  
 S2423  
 S2125  
 S2583  
 S2356  
 S2261  
 S2350  
 S2731  
 S2688  
 S2770A

# ABCC3

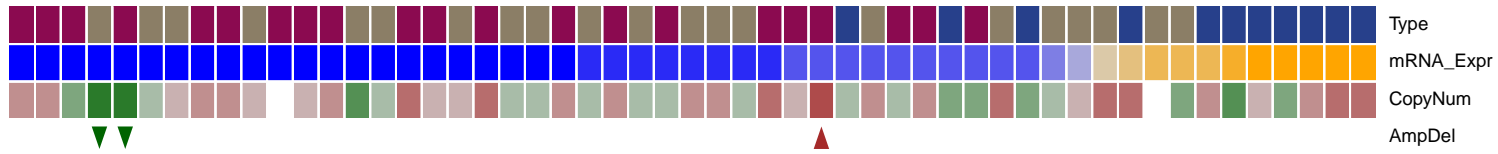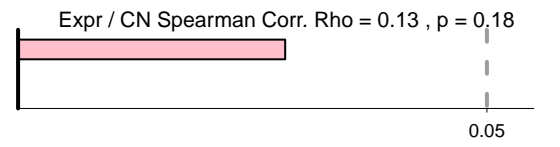

17 : 48711658  
 17 : 48711902  
 17 : 48711990  
 17 : 48712051  
 17 : 48712194  
 17 : 48712198  
 17 : 48712203  
 17 : 48712205  
 17 : 48712212  
 17 : 48712219  
 17 : 48712370  
 17 : 48716301  
 17 : 48745283  
 17 : 48746316  
 17 : 48758651  
 17 : 48764504  
 17 : 48767857  
 17 : 48768755

GeneLoc  
 PromoterAssoc  
 CpGIsland

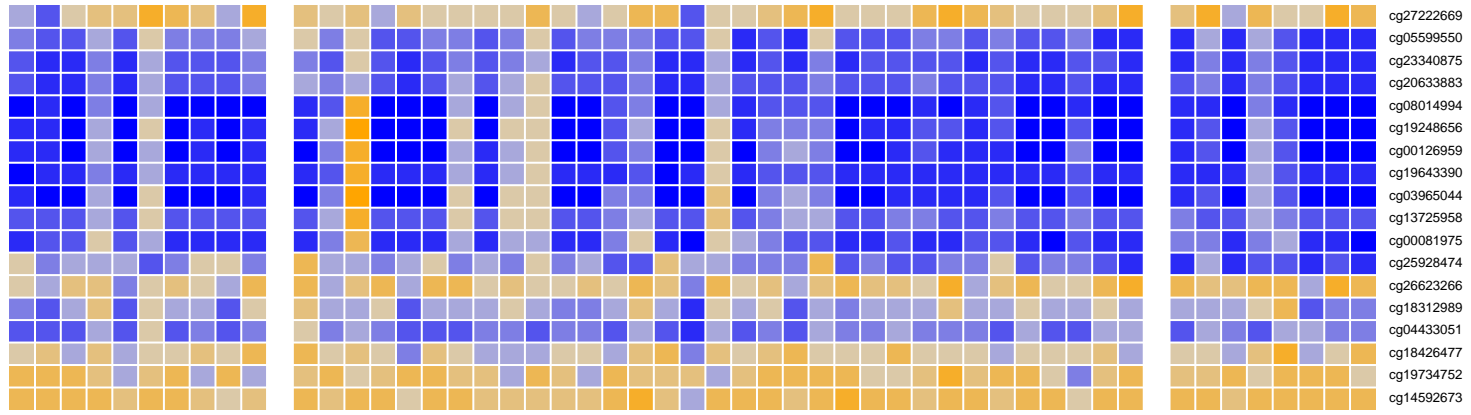

cg27222669  
 cg05599550  
 cg23340875  
 cg20633883  
 cg08014994  
 cg19248656  
 cg00126959  
 cg19643390  
 cg03965044  
 cg13725958  
 cg00081975  
 cg25928474  
 cg26623266  
 cg18312989  
 cg04433051  
 cg18426477  
 cg19734752  
 cg14592673

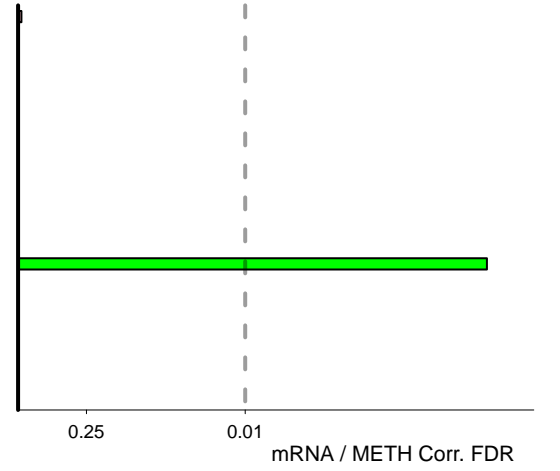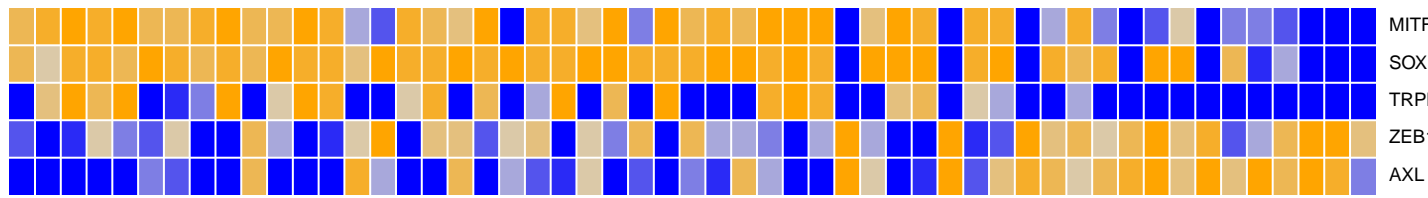

MITF  
 SOX10  
 TRPM1  
 ZEB1  
 AXL

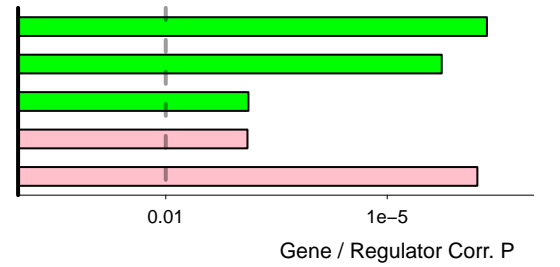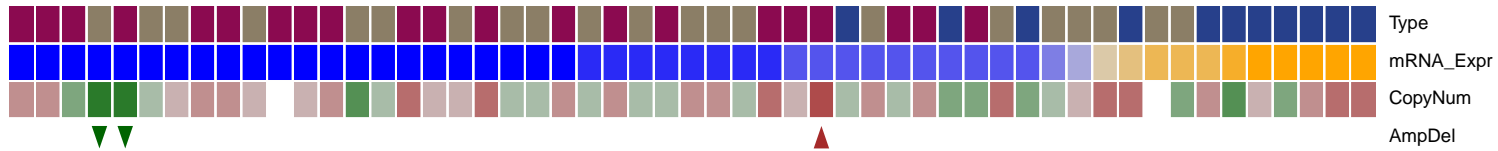

S2761  
 S2357  
 S2521  
 S2596  
 S2765  
 S2392  
 S2333  
 S2373  
 S2374  
 S2423  
 S2667  
 S2391  
 S2510  
 S2800  
 S2495  
 S2189  
 S2379  
 S2153  
 S2406  
 S2549  
 S2247  
 S2330  
 S2767  
 S2718  
 S2645  
 S2408  
 S2380  
 S2734  
 S2410  
 S2320  
 S2400  
 S2216  
 S2356  
 S2812  
 S2279  
 S2508  
 S2770A  
 S2668  
 S2097  
 S2261  
 S2650  
 S2381  
 S2654  
 S2338  
 S2350  
 S2365  
 S2688  
 S2405  
 S2731  
 S2583  
 S2125  
 S2470  
 S2686

Type  
 mRNA\_Expr  
 CopyNum  
 AmpDel

# CSF1

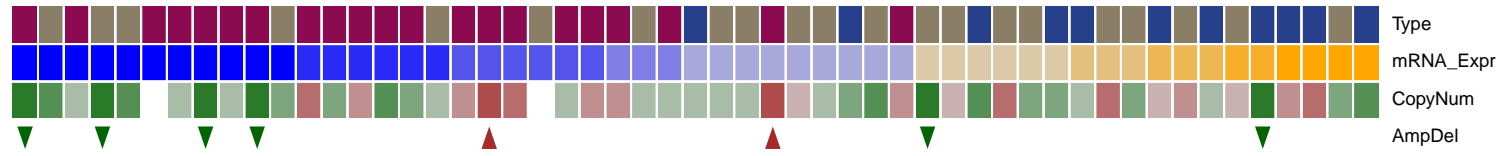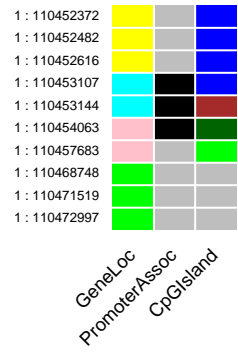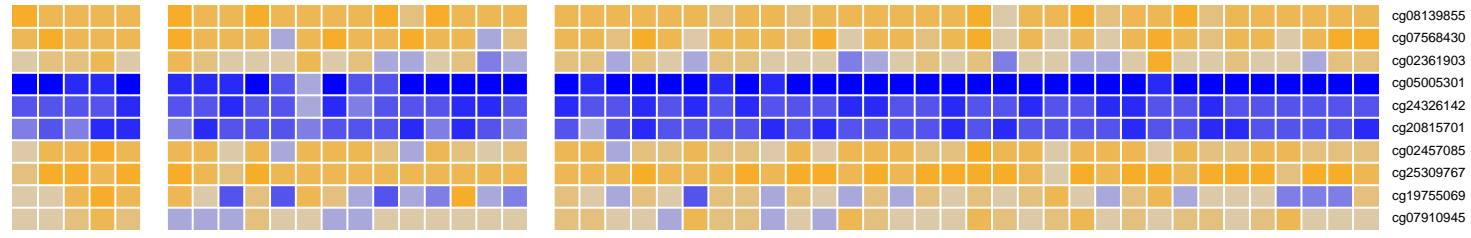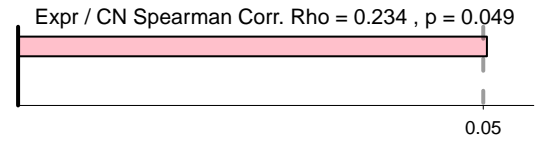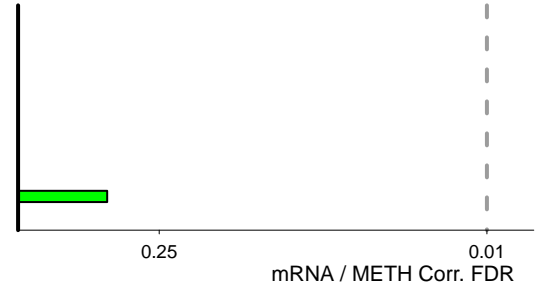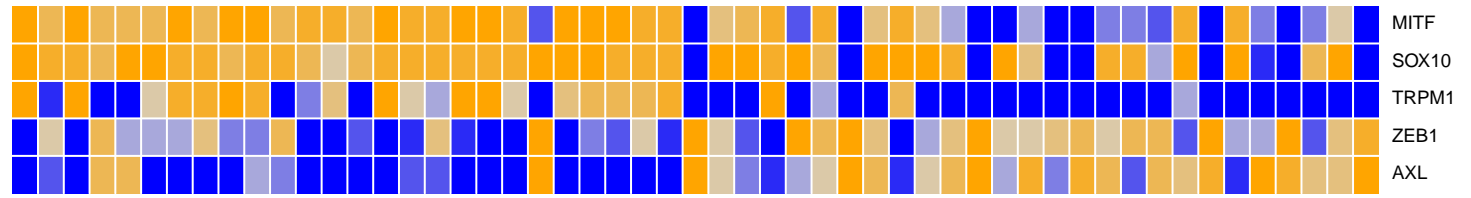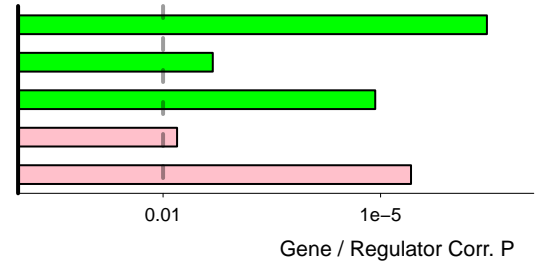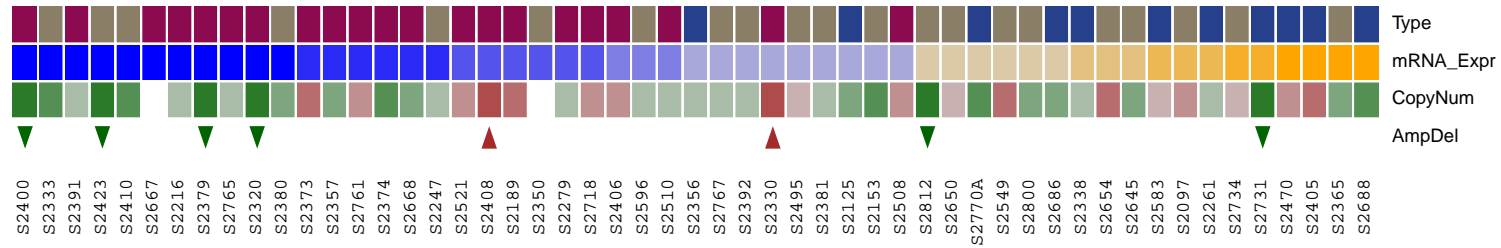

# HEG1

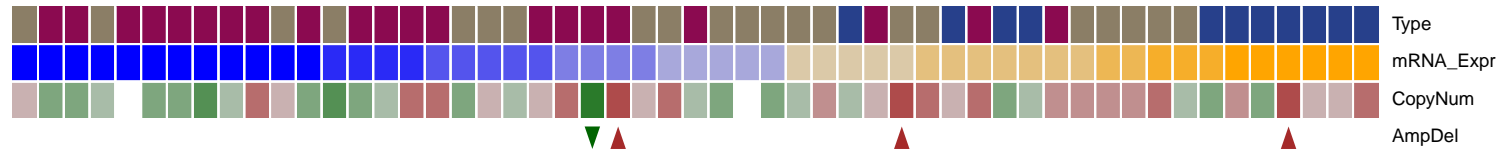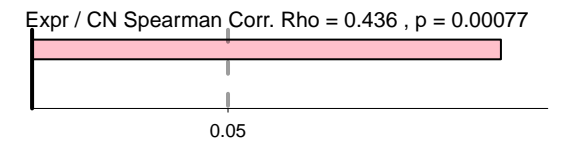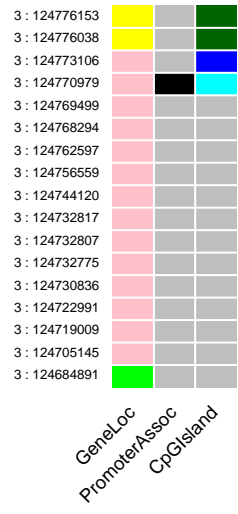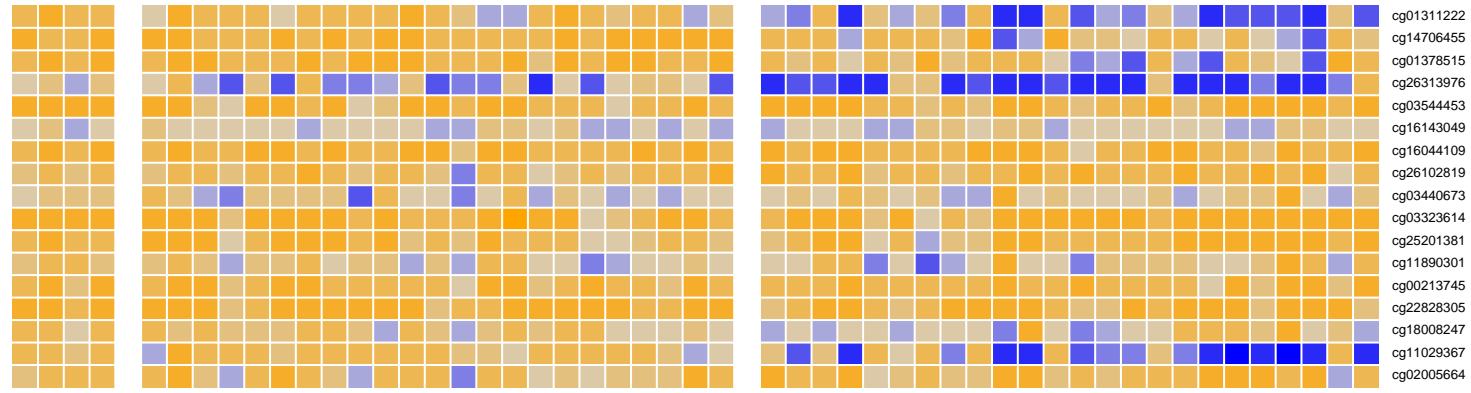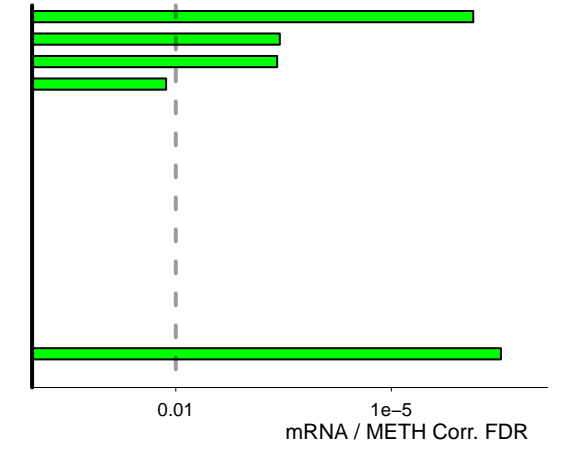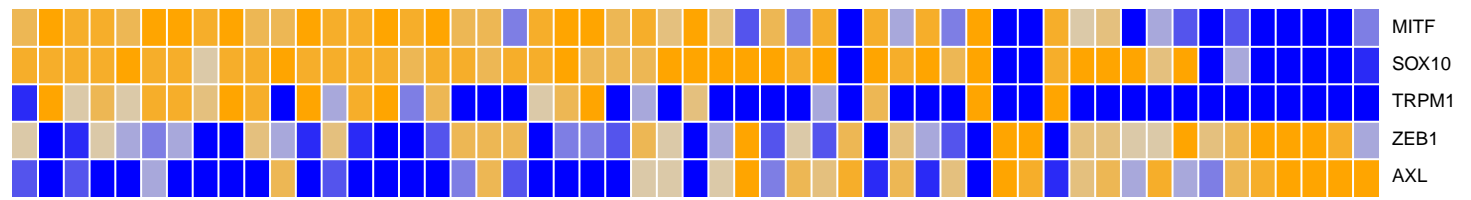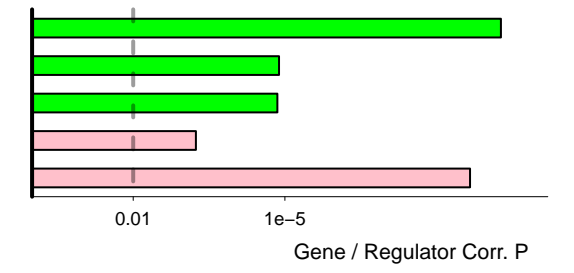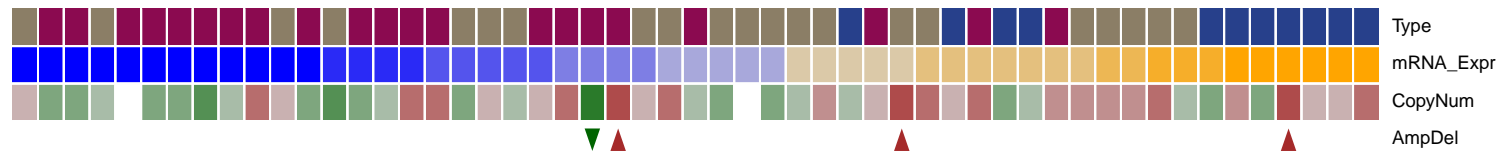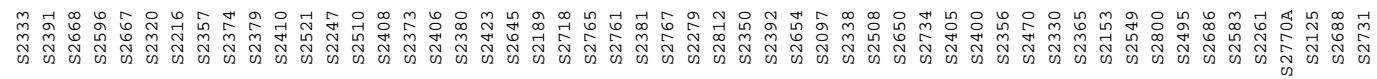

# SPEG

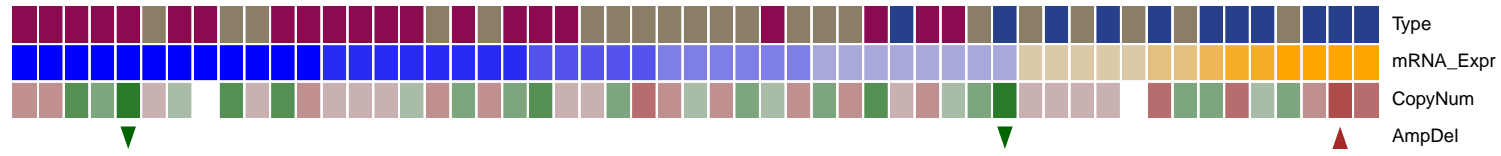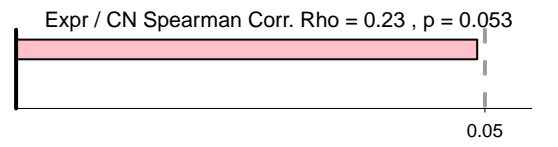

2 : 220298547  
2 : 220299116  
2 : 220299484  
2 : 220299584  
2 : 220299604  
2 : 220299643  
2 : 220299653  
2 : 220299659  
2 : 220299672  
2 : 220299740  
2 : 220299900  
2 : 220300109  
2 : 220300242  
2 : 220300568  
2 : 220301203  
2 : 220301815  
2 : 220303766  
2 : 220304438  
2 : 220305921  
2 : 220307073  
2 : 220307207  
2 : 220308071  
2 : 220308747  
2 : 220309434  
2 : 220309638  
2 : 220309687  
2 : 220309818  
2 : 220310232  
2 : 220312021  
2 : 220312410  
2 : 220312854  
2 : 220313153  
2 : 220313422  
2 : 220313600  
2 : 220313657  
2 : 220313972  
2 : 220314486  
2 : 220315342  
2 : 220316415  
2 : 220317372  
2 : 220324649  
2 : 220324656  
2 : 220325369  
2 : 220325375  
2 : 220330746  
2 : 220333756  
2 : 220341206  
2 : 220346095  
2 : 220348312  
2 : 220348515  
2 : 220348592  
2 : 220348803  
2 : 220349117  
2 : 220349208  
2 : 220349615  
2 : 220349733  
2 : 220350567  
2 : 220351040  
2 : 220352476  
2 : 220355154  
2 : 220355222  
2 : 220355252  
2 : 220357608  
2 : 220360817  
2 : 220361063  
2 : 220361467  
2 : 220361609  
2 : 220361916  
2 : 220362074  
2 : 220362124  
2 : 220362163  
2 : 220362212  
2 : 220362242

GeneLoc  
PromoterAssoc  
CpIsland

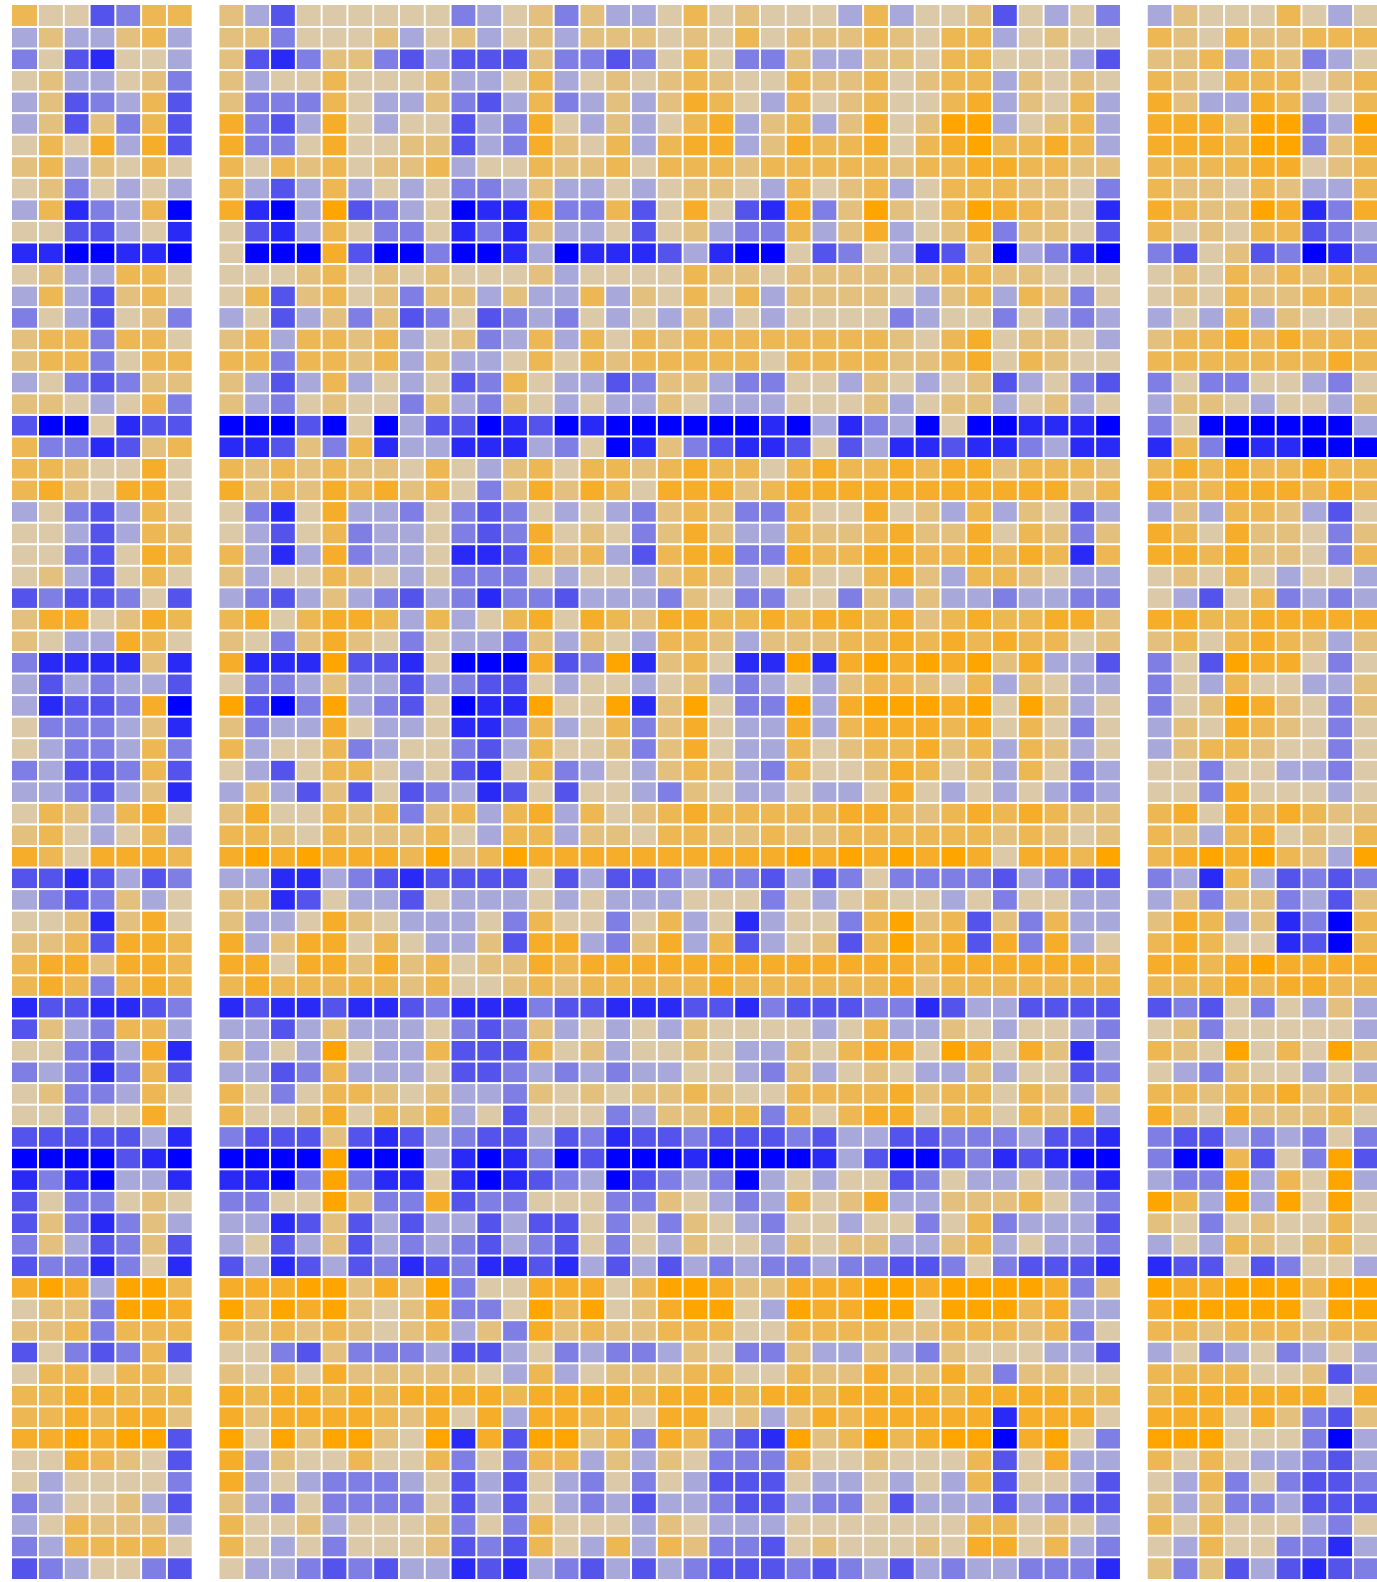

cg22126505  
cg14074251  
cg25925023  
cg07820064  
cg18984724  
cg15634877  
cg12213062  
cg23065715  
cg24207529  
cg07921384  
cg20174636  
cg13437337  
cg17285709  
cg24685587  
cg10583876  
cg09497276  
cg26667692  
cg11025743  
cg03394909  
cg10177207  
cg03906033  
cg16222568  
cg10062065  
cg15971761  
cg25852019  
cg12102631  
cg23987500  
cg25619638  
cg03358313  
cg26530345  
cg16440561  
cg02323356  
cg01727145  
cg05351827  
cg25008858  
cg11666555  
cg08885556  
cg10390177  
cg06344576  
cg03030650  
cg20398132  
cg03693568  
cg21117965  
cg07974504  
cg19736490  
cg23712156  
cg25476129  
cg05707506  
cg27252970  
cg18131810  
cg11841522  
cg00495988  
cg15415787  
cg02869459  
cg00803453  
cg02487130  
cg06351981  
cg02557933  
cg20456243  
cg13767494  
cg12637786  
cg19715873  
cg19497021  
cg00680696  
cg02549182  
cg11361344  
cg16918905  
cg08801795  
cg11104474  
cg12458485  
cg10020325  
cg03267697  
cg19930135

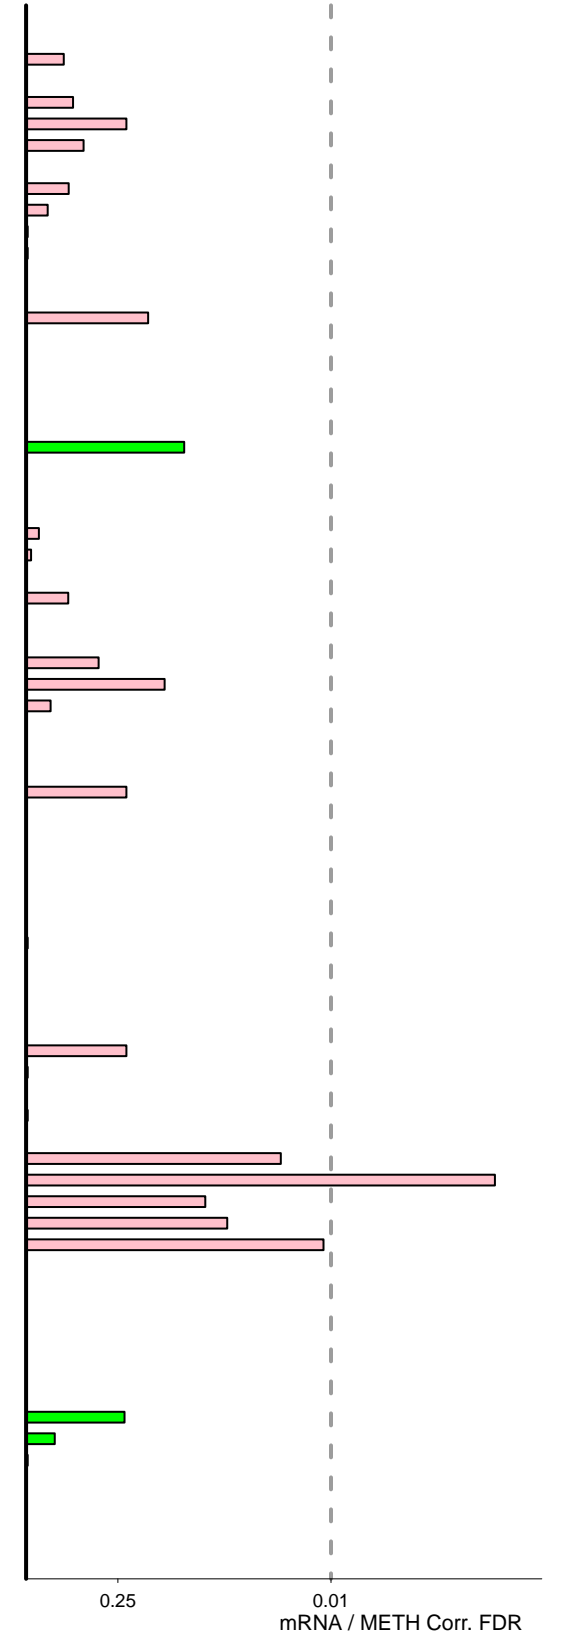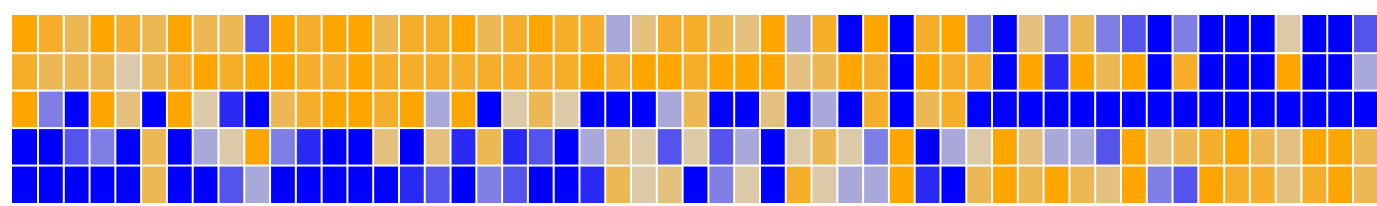

MITF  
SOX10  
TRPM1  
ZEB1  
AXL

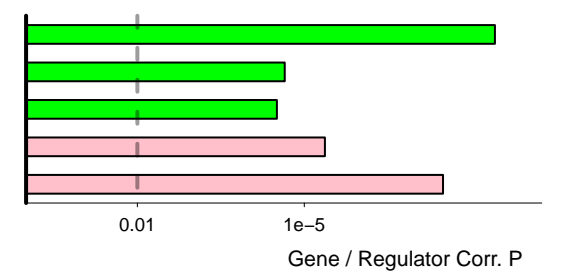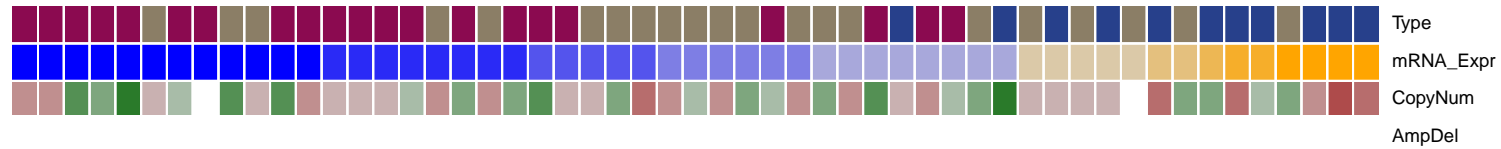

S2374  
S2373  
S2761  
S2765  
S2357  
S2423  
S2408  
S2667  
S2333  
S2495  
S2718  
S2510  
S2391  
S2400  
S2379  
S2330  
S2247  
S2521  
S2380  
S2668  
S2406  
S2189  
S2734  
S2650  
S2767  
S2097  
S2596  
S2392  
S2812  
S2279  
S2800  
S2381  
S2549  
S2320  
S2320  
S2770A  
S2508  
S2216  
S2654  
S2125  
S2153  
S2731  
S2410  
S2405  
S2350  
S2686  
S2645  
S2688  
S2470  
S2338  
S2365  
S2261  
S2356  
S2583



# FBN1

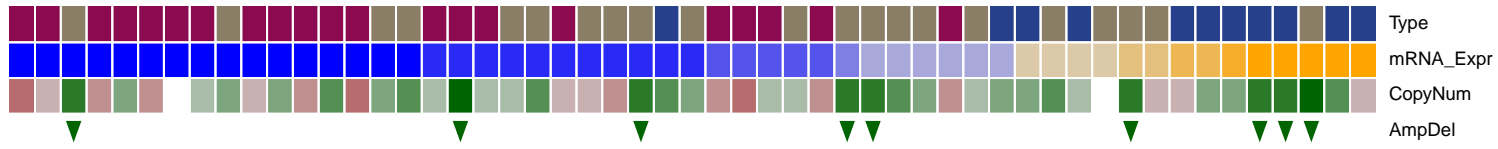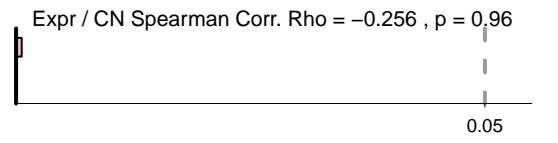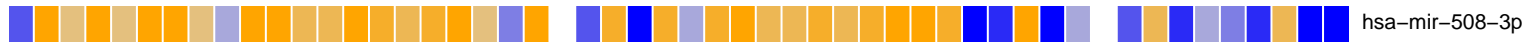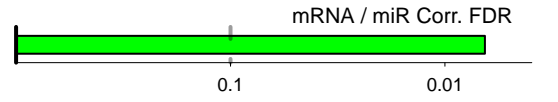

15 : 48939483  
 15 : 48938775  
 15 : 48938576  
 15 : 48938370  
 15 : 48938347  
 15 : 48938239  
 15 : 48937958  
 15 : 48937856  
 15 : 48937213  
 15 : 48936953  
 15 : 48936335  
 15 : 48936208  
 15 : 48935514  
 15 : 48934176  
 15 : 48931946  
 15 : 48925049  
 15 : 48918030  
 15 : 48895633  
 15 : 48874903  
 15 : 48846541  
 15 : 48839797  
 15 : 48829009  
 15 : 48822481  
 15 : 48819726  
 15 : 48785738  
 15 : 48752032  
 15 : 48732134  
 15 : 48726513  
 15 : 48705662  
 15 : 48701515

GeneLoc  
 PromoterAssoc  
 CpGIsland

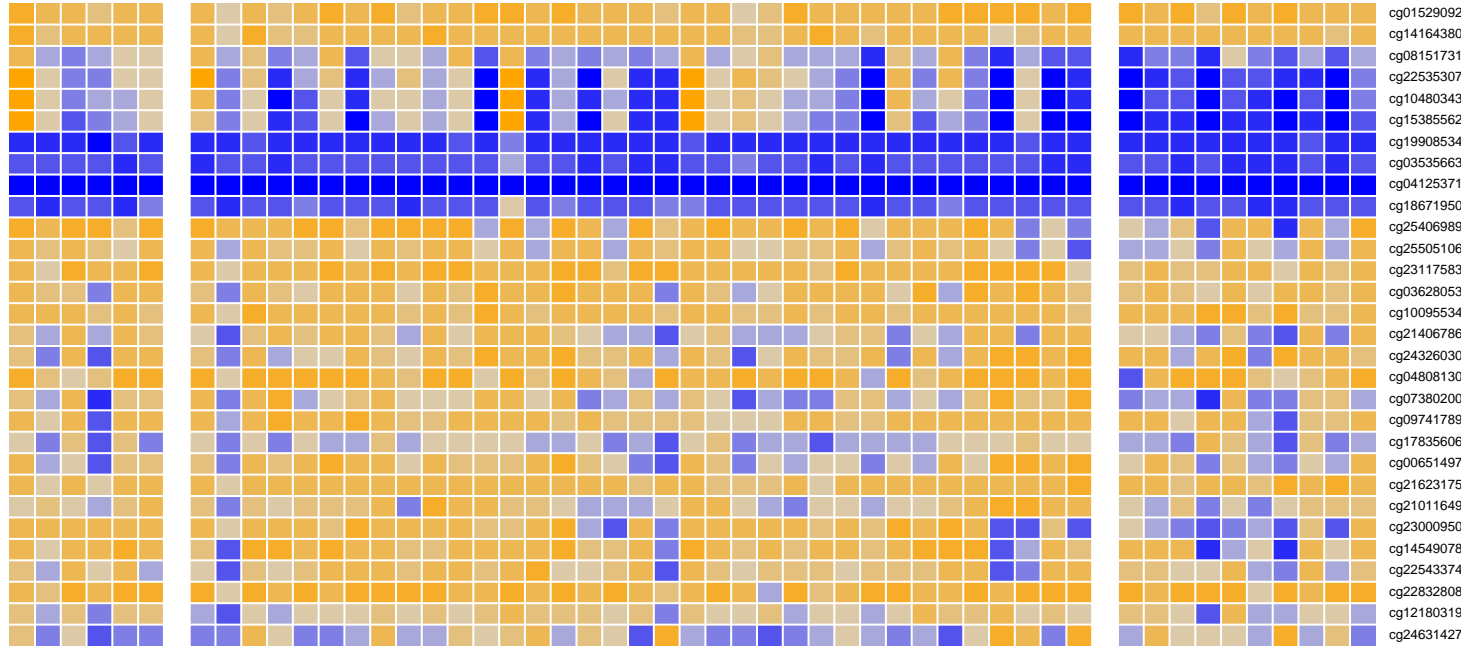

cg01529092  
 cg14164380  
 cg08151731  
 cg22535307  
 cg10480343  
 cg15385562  
 cg19908534  
 cg03535663  
 cg04125371  
 cg18671950  
 cg25406989  
 cg25505106  
 cg23117583  
 cg03628053  
 cg10095534  
 cg21406786  
 cg24326030  
 cg04808130  
 cg07380200  
 cg09741789  
 cg17835606  
 cg00651497  
 cg21623175  
 cg21011649  
 cg23000950  
 cg14549078  
 cg22543374  
 cg22832808  
 cg12180319  
 cg24631427

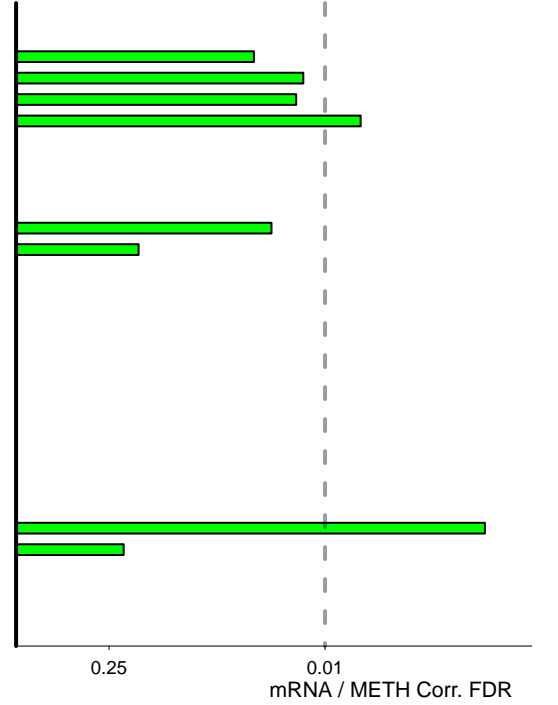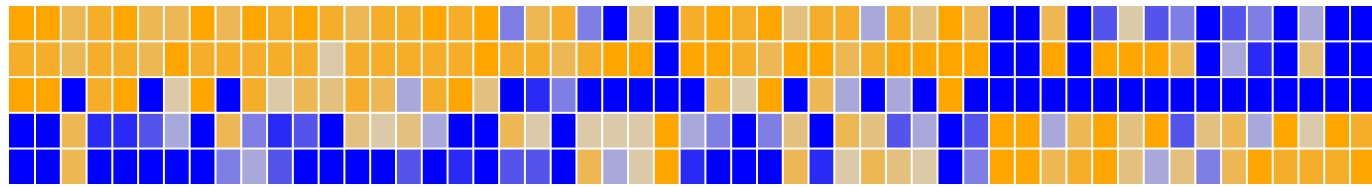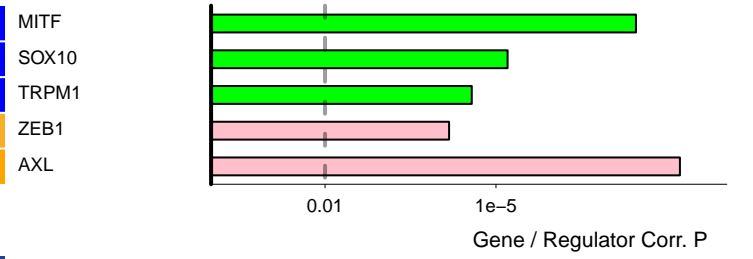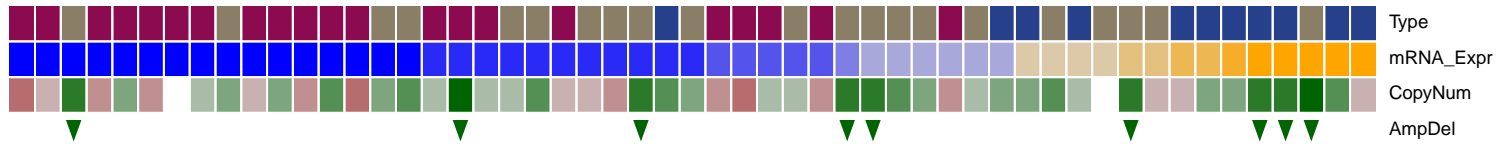

S2391  
 S2374  
 S2423  
 S2510  
 S2521  
 S2761  
 S2667  
 S2408  
 S2380  
 S2320  
 S2668  
 S2406  
 S2357  
 S2379  
 S2596  
 S2247  
 S2216  
 S2330  
 S2279  
 S2645  
 S2333  
 S2373  
 S2654  
 S2549  
 S2767  
 S2770A  
 S2734  
 S2718  
 S2189  
 S2765  
 S2153  
 S2508  
 S2381  
 S2650  
 S2097  
 S2812  
 S2400  
 S2392  
 S2356  
 S2125  
 S2410  
 S2338  
 S2350  
 S2365  
 S2495  
 S2405  
 S2686  
 S2583  
 S2731  
 S2470  
 S2800  
 S2261  
 S2688

# PXDN

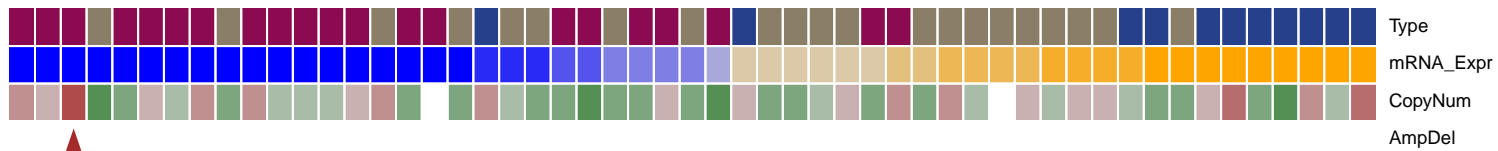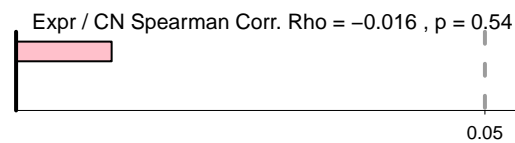

- 2:1749076
- 2:1748970
- 2:1748876
- 2:1748872
- 2:1748617
- 2:1748337
- 2:1748132
- 2:1748112
- 2:1747700
- 2:1747364
- 2:1747082
- 2:1746846
- 2:1746647
- 2:1746591
- 2:1746509
- 2:1746253
- 2:1746207
- 2:1745828
- 2:1745630
- 2:1743009
- 2:1734344
- 2:1732454
- 2:1732347
- 2:1732234
- 2:1732172
- 2:1725761
- 2:1719323
- 2:1713388
- 2:1713001
- 2:1712800
- 2:1712527
- 2:1712318
- 2:1711966
- 2:1711796
- 2:1711759
- 2:1711134
- 2:1700694
- 2:1695357
- 2:1695316
- 2:1691184
- 2:1691165
- 2:1691062
- 2:1690740
- 2:1690625
- 2:1690592
- 2:1689803
- 2:1689137
- 2:1684270
- 2:1684003
- 2:1683948
- 2:1682412
- 2:1682401
- 2:1682348
- 2:1682068
- 2:1681820
- 2:1681494
- 2:1681153
- 2:1681098
- 2:1680784
- 2:1680739
- 2:1670835
- 2:1670202
- 2:1670073
- 2:1669072
- 2:1668936
- 2:1668758
- 2:1668487
- 2:1667492
- 2:1667458
- 2:1667404
- 2:1663689
- 2:1659591
- 2:1658233
- 2:1658190
- 2:1657483
- 2:1657462
- 2:1656557
- 2:1654326
- 2:1653118
- 2:1652585
- 2:1652518
- 2:1652480
- 2:1652362
- 2:1651130
- 2:1648485
- 2:1647260
- 2:1647197
- 2:1647185
- 2:1646050
- 2:1645301
- 2:1637068

GeneLoc  
PromoterAssoc  
CpGIsland

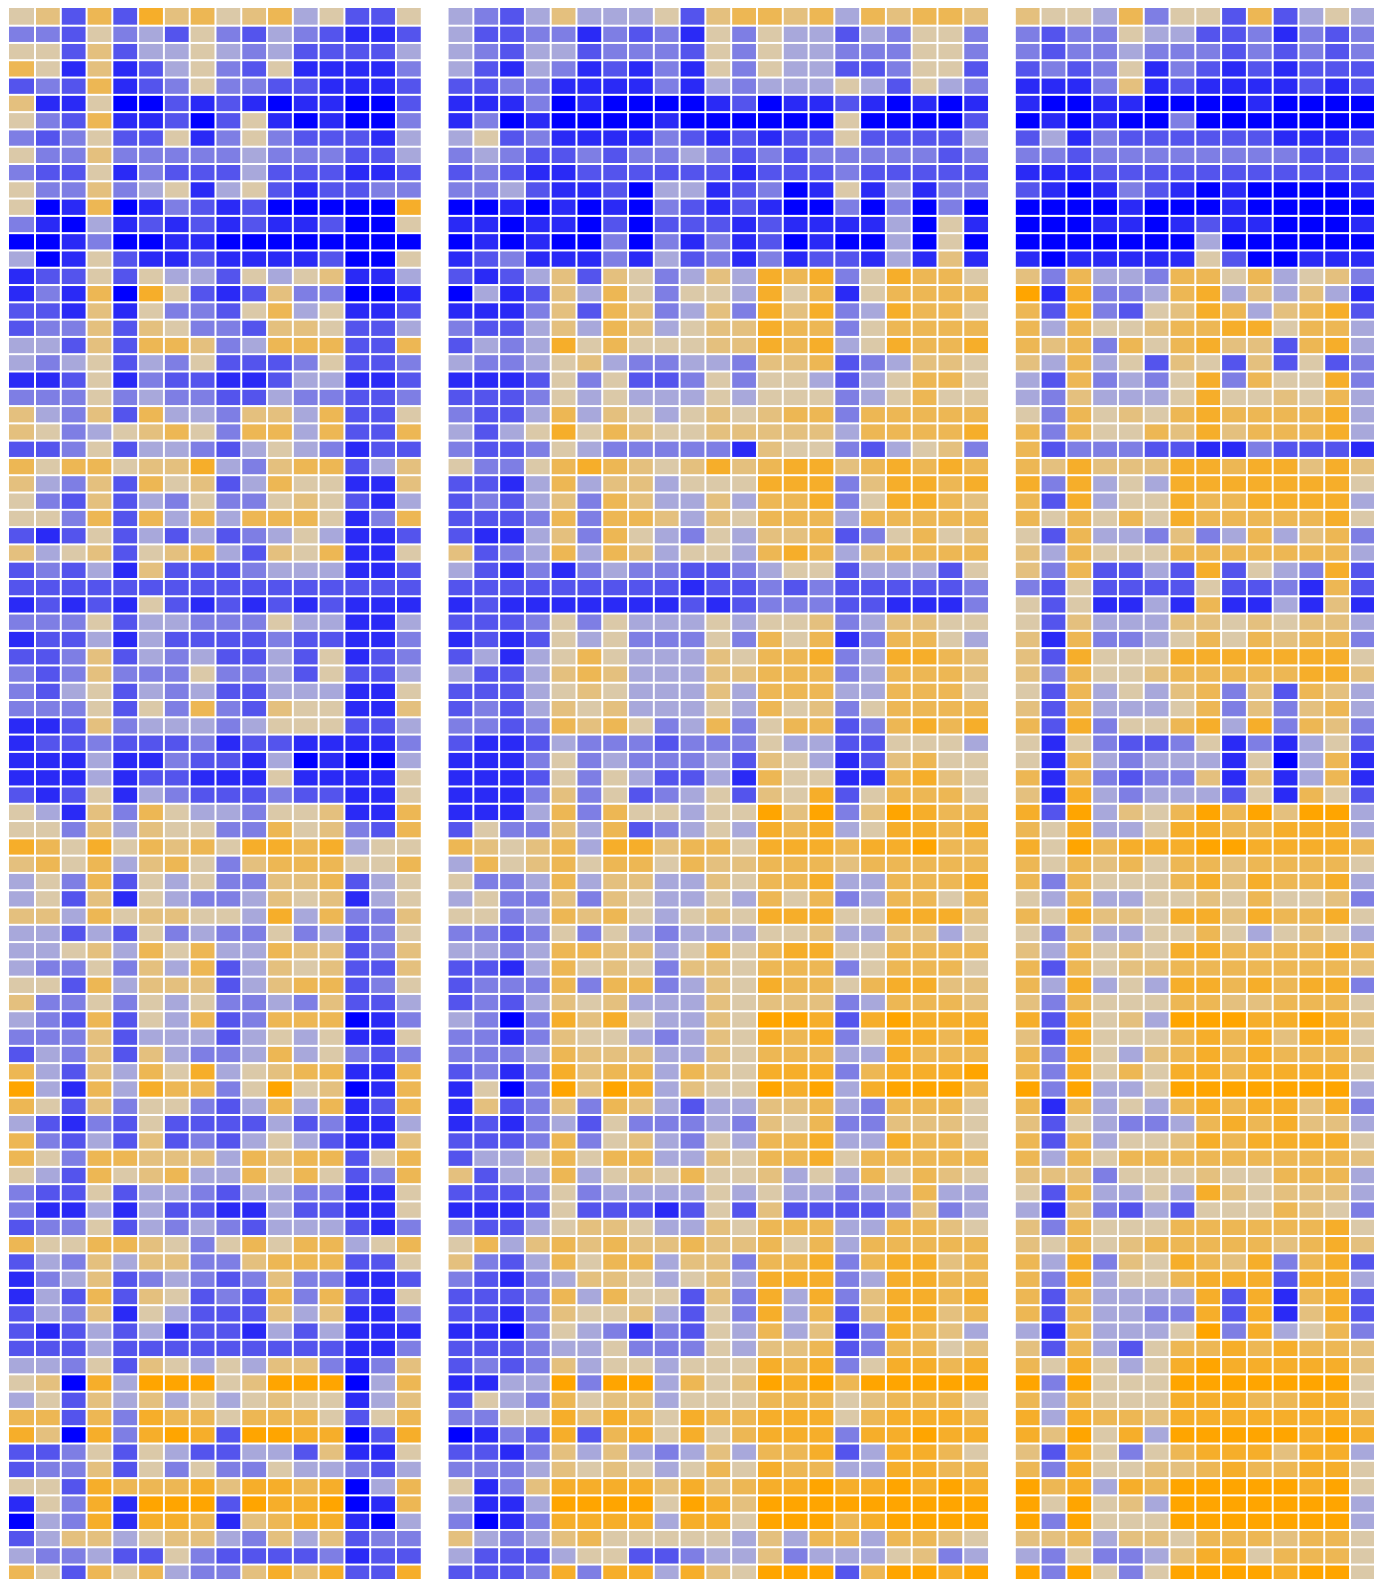

- cg17801352
- cg01805732
- cg05241015
- cg24129977
- cg14037665
- cg09118932
- cg25181651
- cg12164282
- cg08534653
- cg09618102
- cg19517718
- cg12780678
- cg08166568
- cg19300414
- cg06592929
- cg15914335
- cg20311673
- cg27472176
- cg00511632
- cg01821226
- cg12760299
- cg09757250
- cg15489196
- cg05041671
- cg07872947
- cg08216099
- cg01271695
- cg23634829
- cg10160682
- cg20570797
- cg10366053
- cg18548165
- cg01328473
- cg16909084
- cg09699787
- cg02862067
- cg18530712
- cg26381919
- cg12351906
- cg27160524
- cg01454538
- cg21464492
- cg04409509
- cg20417128
- cg14671764
- cg09389557
- cg22648929
- cg23397325
- cg16925003
- cg01928136
- cg23858189
- cg24676303
- cg18943812
- cg09996777
- cg26146455
- cg04436724
- cg23055707
- cg07207923
- cg14578866
- cg24767423
- cg17467517
- cg06460400
- cg09921371
- cg14230647
- cg03267487
- cg12624031
- cg08084799
- cg25306511
- cg00682069
- cg03591285
- cg06836544
- cg19769520
- cg07029777
- cg11728145
- cg21647182
- cg01629007
- cg24741066
- cg08380973
- cg07772817
- cg18794122
- cg26063629
- cg04014726
- cg12495069
- cg00038342
- cg07701911
- cg14994258
- cg15796818
- cg07608848
- cg21664909
- cg05514883
- cg10888111

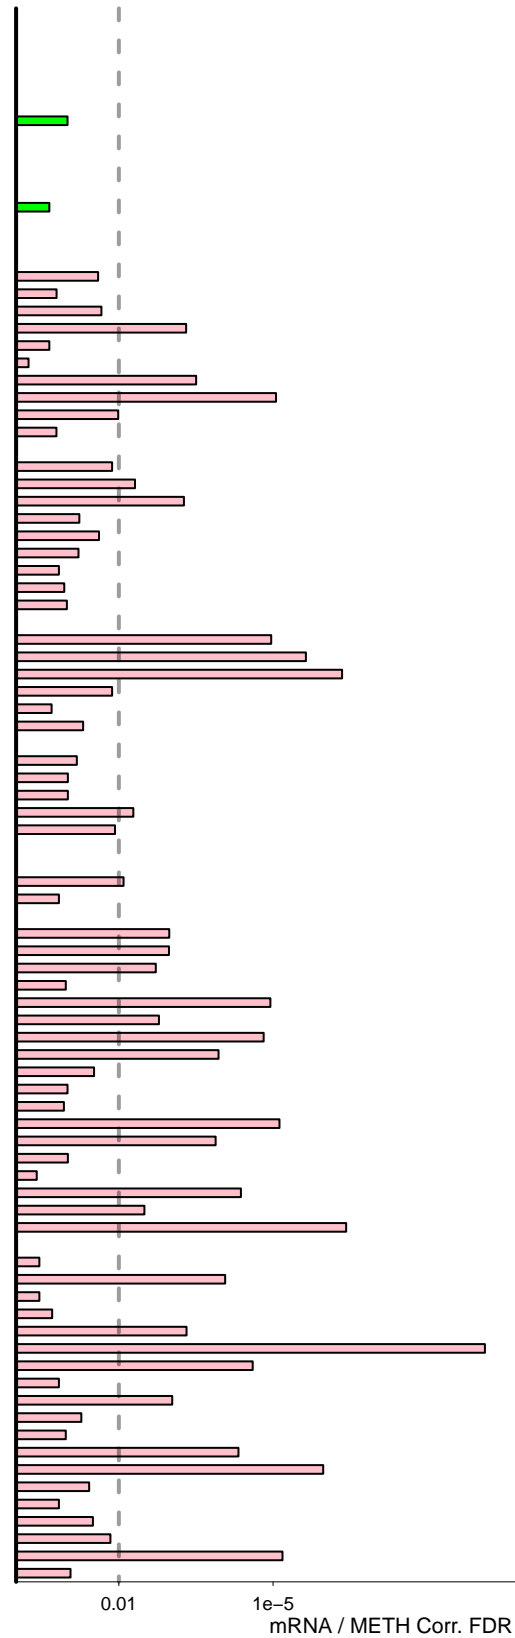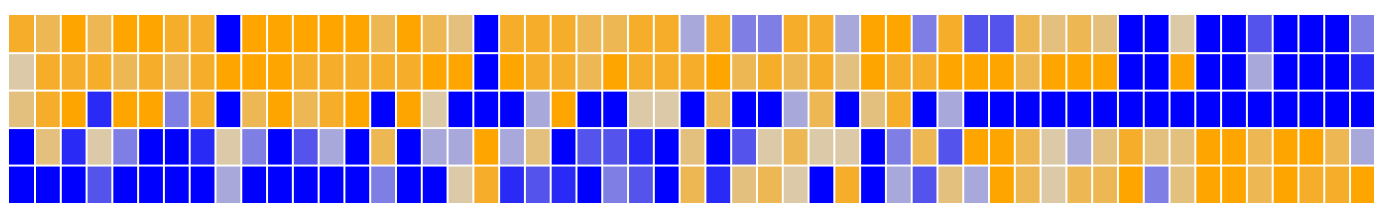

- MITF
- SOX10
- TRPM1
- ZEB1
- AXL

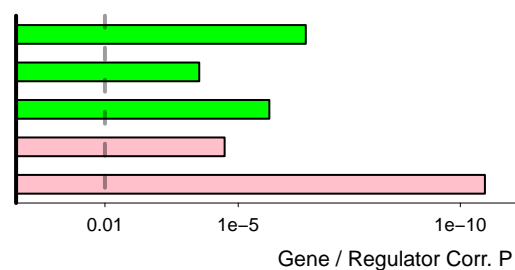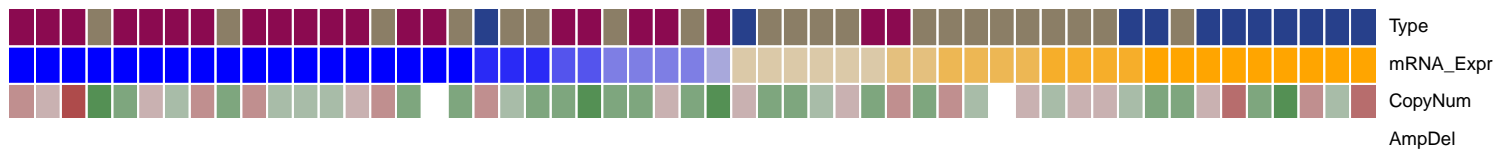

- S2357
- S2379
- S2521
- S2333
- S2765
- S2391
- S2373
- S2510
- S2549
- S2718
- S2400
- S2406
- S2216
- S2374
- S2380
- S2408
- S2667
- S2812
- S2470
- S2734
- S2247
- S2330
- S2392
- S2668
- S2189
- S2650
- S2508
- S2405
- S2654
- S2381
- S2596
- S2800
- S2279
- S2320
- S2645
- S2097
- S2495
- S2350
- S2423
- S2767
- S2410
- S2153
- S2688
- S2686
- S2365
- S2770A
- S2356
- S2583
- S2125
- S2261
- S2338
- S2731

# ALCAM

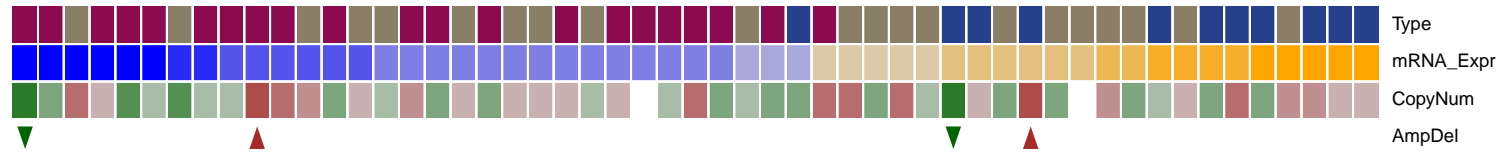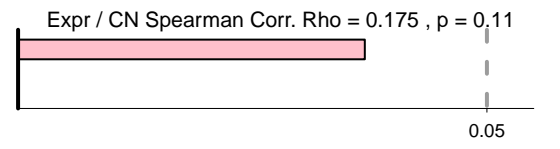

3 : 105084992  
 3 : 105085073  
 3 : 105085294  
 3 : 105085463  
 3 : 105085465  
 3 : 105085521  
 3 : 105085562  
 3 : 105085597  
 3 : 105085614  
 3 : 105085633  
 3 : 105085701  
 3 : 105085991  
 3 : 105086143  
 3 : 105086213  
 3 : 105086573  
 3 : 105086940  
 3 : 105087171  
 3 : 105087206  
 3 : 105087242  
 3 : 105087718  
 3 : 105088088  
 3 : 105088098  
 3 : 105088217  
 3 : 105088263  
 3 : 105088546  
 3 : 105105844  
 3 : 105133817  
 3 : 105145478  
 3 : 105149981  
 3 : 105159482  
 3 : 105166570  
 3 : 105167621  
 3 : 105178356  
 3 : 105191532  
 3 : 105221308  
 3 : 105228864  
 3 : 105236259  
 3 : 105244696  
 3 : 105246298  
 3 : 105247852  
 3 : 105293613

GeneLoc  
 PromoterAssoc  
 CpGIsland

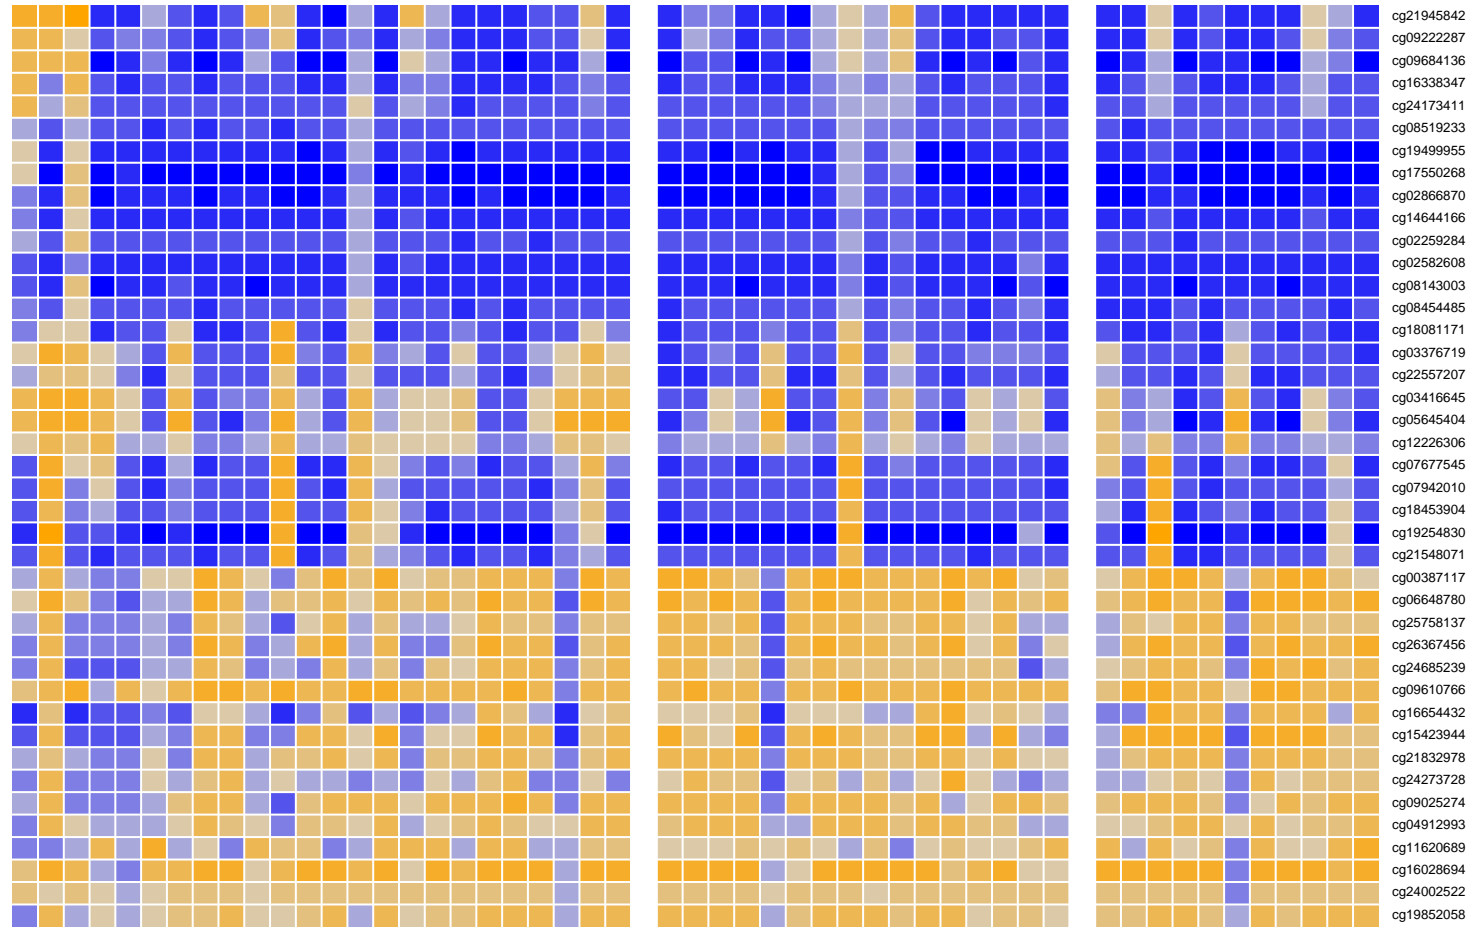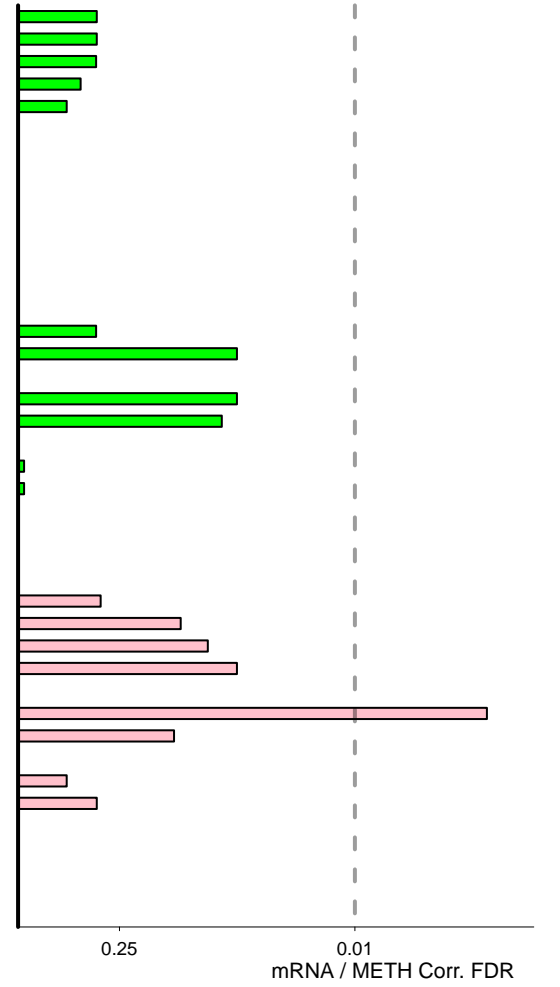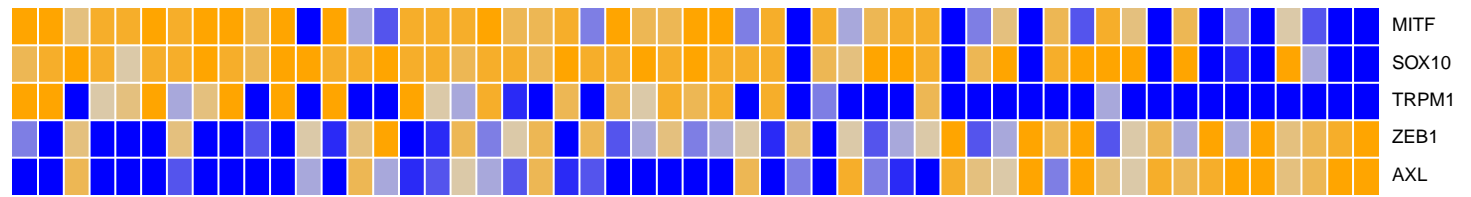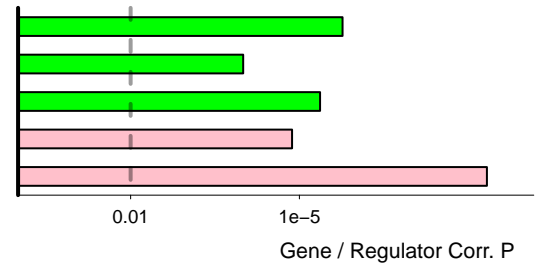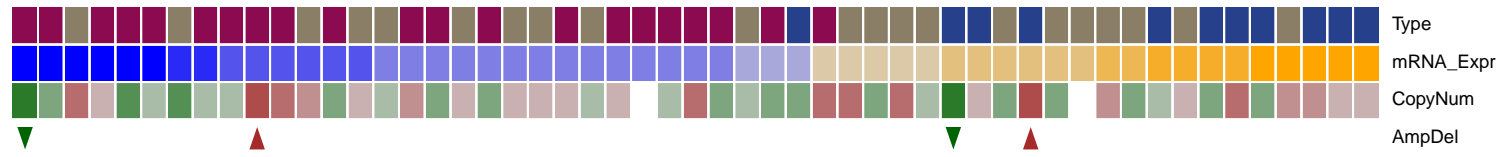

S2765  
 S2391  
 S2153  
 S2189  
 S2357  
 S2374  
 S2247  
 S2279  
 S2408  
 S2761  
 S2400  
 S2549  
 S2521  
 S2650  
 S2495  
 S2330  
 S2668  
 S2381  
 S2320  
 S2333  
 S2423  
 S2508  
 S2645  
 S2406  
 S2667  
 S2379  
 S2718  
 S2216  
 S2654  
 S2510  
 S2686  
 S2373  
 S2800  
 S2392  
 S2734  
 S2596  
 S2470  
 S2405  
 S2812  
 S2770A  
 S2380  
 S2350  
 S2097  
 S2767  
 S2338  
 S2410  
 S2261  
 S2731  
 S2356  
 S2365  
 S2583  
 S2688  
 S2125

# GLIS3

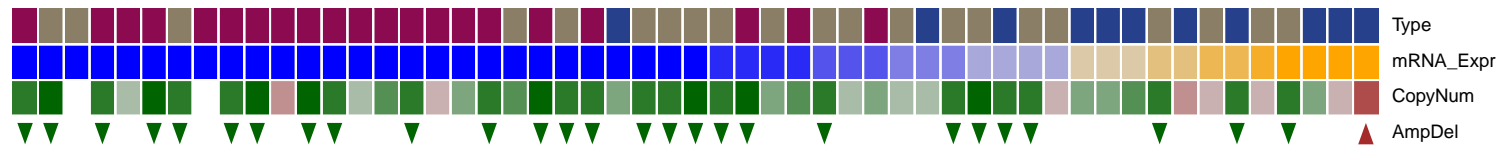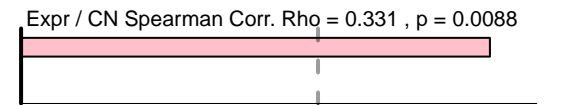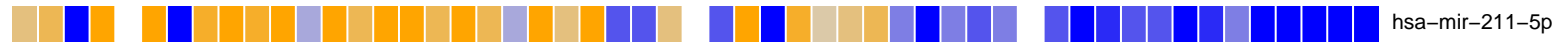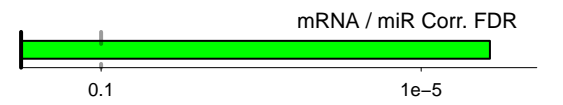

9: 4300432  
9: 4300203  
9: 4299830  
9: 4299768  
9: 4299549  
9: 4299221  
9: 4298749  
9: 4298452  
9: 4297626  
9: 4297433  
9: 4294020  
9: 4226519  
9: 4224635  
9: 4195347  
9: 4151723  
9: 4139392  
9: 4133112  
9: 4118572  
9: 4118274  
9: 4116989  
9: 4116422  
9: 4115070  
9: 4098735  
9: 4083904  
9: 4080919  
9: 4056108  
9: 3899055  
9: 3894432  
9: 3874932  
9: 3828562

GeneLoc  
PromoterAssoc  
CpGIsland

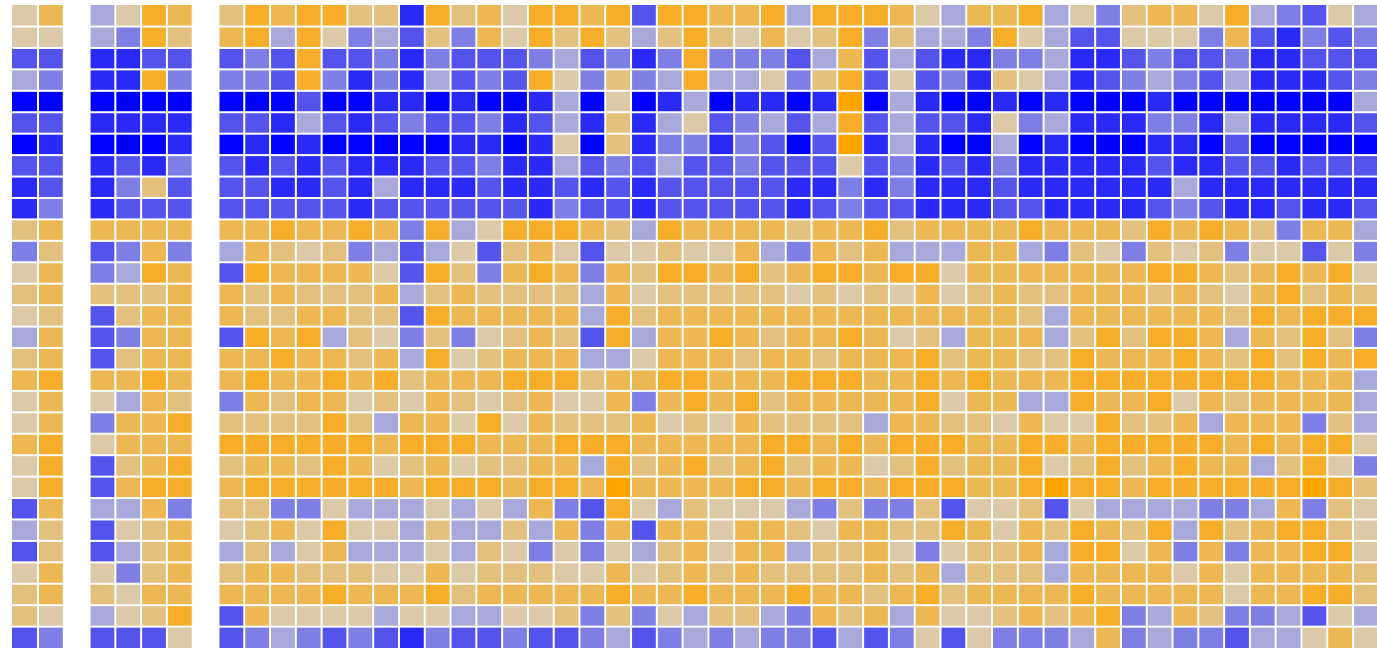

cg23053961  
cg10836809  
cg13513288  
cg23333878  
cg14114673  
cg08303922  
cg13802457  
cg05052888  
cg14110111  
cg01619345  
cg13573115  
cg14462686  
cg13555519  
cg13804450  
cg09386615  
cg14302428  
cg13749266  
cg05109791  
cg04010205  
cg06935438  
cg13936363  
cg14325112  
cg13409578  
cg14641122  
cg14047387  
cg14318068  
cg14269813  
cg13977600  
cg13770114  
cg14340481

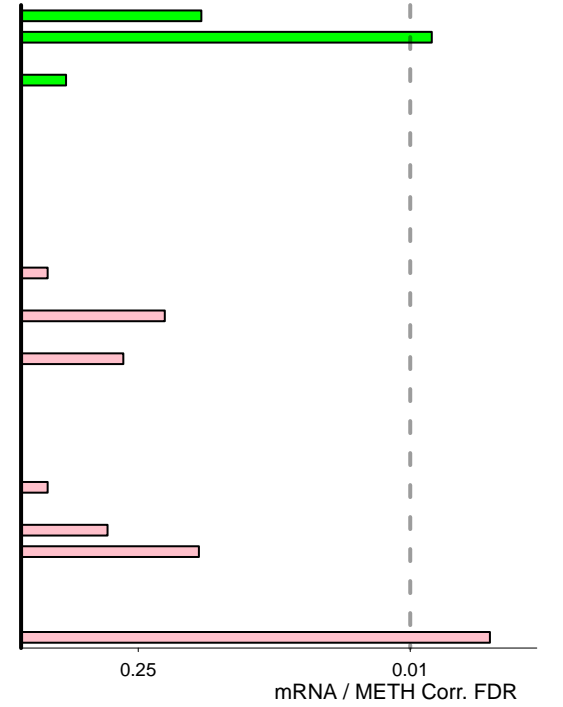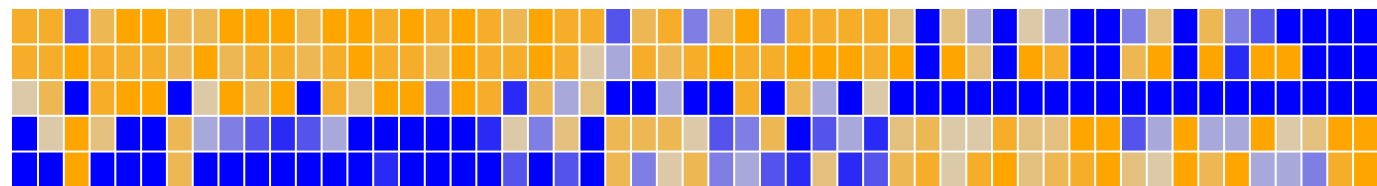

MITF  
SOX10  
TRPM1  
ZEB1  
AXL

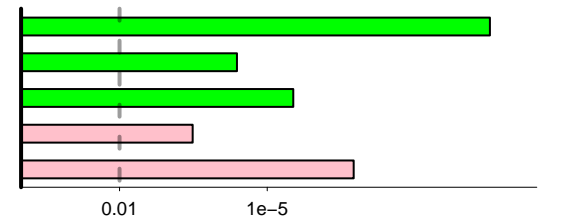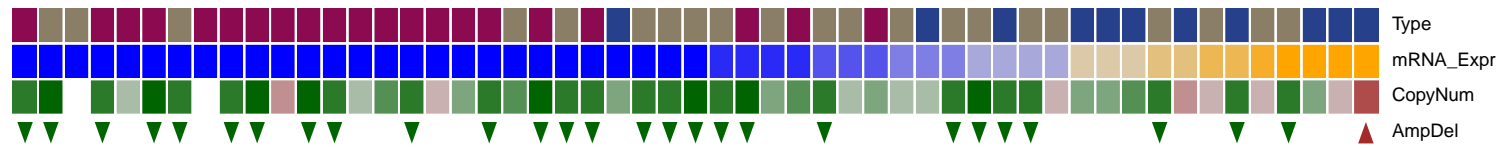

S2189  
S2596  
S2350  
S2379  
S2391  
S2408  
S2423  
S2667  
S2765  
S2406  
S2521  
S2761  
S2216  
S2279  
S2330  
S2374  
S2373  
S2400  
S2510  
S2333  
S2718  
S2247  
S2357  
S2583  
S2380  
S2381  
S2654  
S2392  
S2320  
S2645  
S2508  
S2097  
S2734  
S2668  
S2153  
S2338  
S2767  
S2800  
S2688  
S2365  
S2650  
S2261  
S2356  
S2405  
S2812  
S2770A  
S2410  
S2731  
S2495  
S2549  
S2686  
S2470  
S2125

Gene / Regulator Corr. P

# SPOCK1

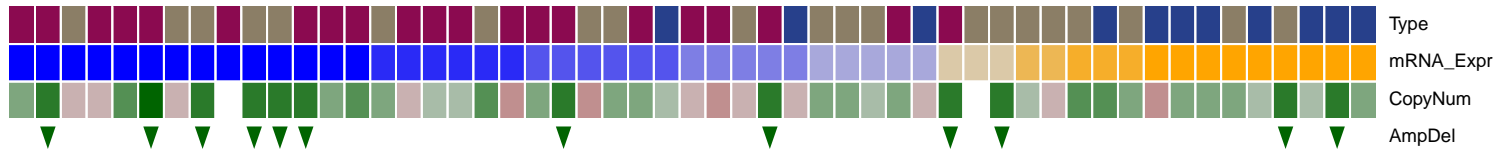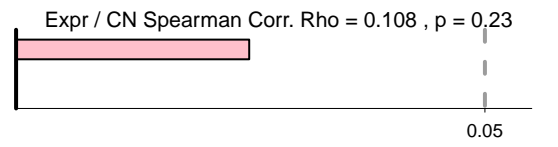

5 : 136874226  
5 : 136838333  
5 : 136837077  
5 : 136836414  
5 : 136836378  
5 : 136834863  
5 : 136834492  
5 : 136834464  
5 : 136834453  
5 : 136834392  
5 : 136834294  
5 : 136834155  
5 : 136833893  
5 : 136833216  
5 : 136831390  
5 : 136682394  
5 : 136646719  
5 : 136645665  
5 : 136640472  
5 : 136636409  
5 : 136636219  
5 : 136630712  
5 : 136522913  
5 : 136481972  
5 : 136478693  
5 : 136426335  
5 : 136374727  
5 : 136359400  
5 : 136341152  
5 : 136340207  
5 : 136340060  
5 : 136320310  
5 : 136314223

GeneLoc  
PromoterAssoc  
CpGIsland

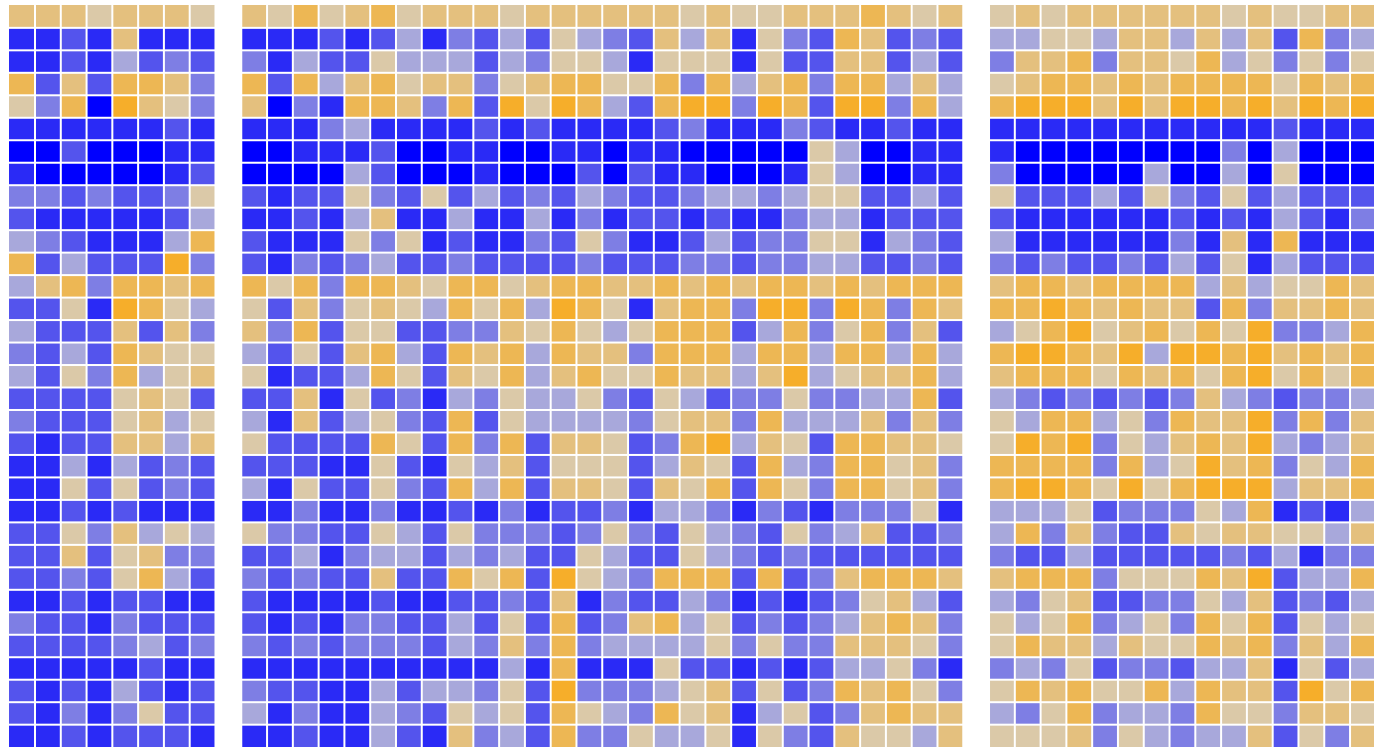

cg15206500  
cg27640528  
cg06999346  
cg03554765  
cg03639488  
cg12832649  
cg14650610  
cg24847829  
cg18263365  
cg18603028  
cg09054633  
cg01104047  
cg26059202  
cg04927066  
cg03565923  
cg19567866  
cg17879574  
cg09642428  
cg21143428  
cg12401953  
cg08635765  
cg02399826  
cg05480370  
cg26968544  
cg06438559  
cg22909935  
cg17221083  
cg01402631  
cg07510510  
cg18998172  
cg22902550  
cg21582240  
cg22612642

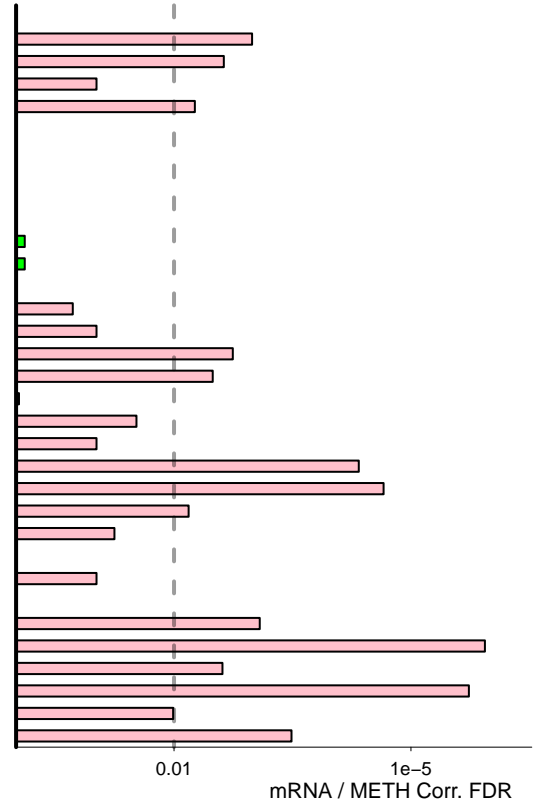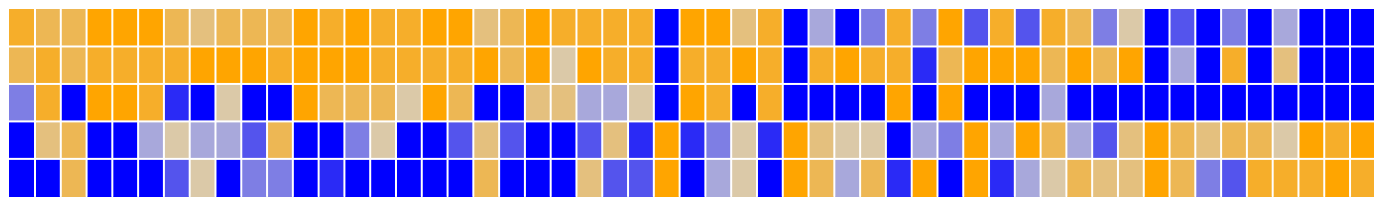

MITF  
SOX10  
TRPM1  
ZEB1  
AXL

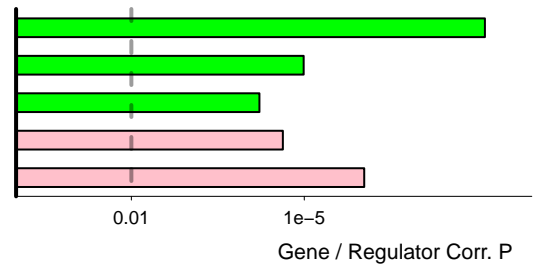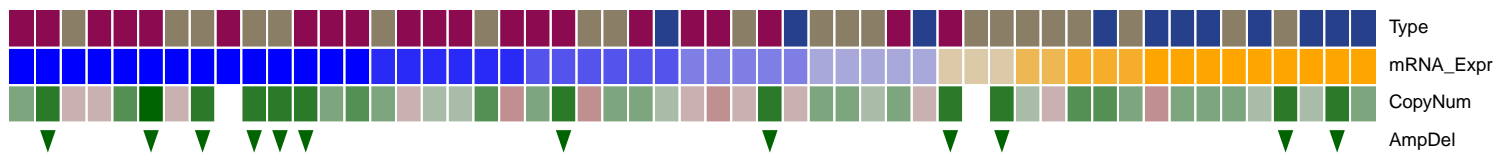

S2373  
S2379  
S2423  
S2374  
S2391  
S2216  
S2333  
S2812  
S2667  
S2392  
S2380  
S2400  
S2508  
S2718  
S2596  
S2189  
S2408  
S2406  
S2153  
S2761  
S2279  
S2357  
S2097  
S2247  
S2668  
S2356  
S2521  
S2320  
S2767  
S2510  
S2770A  
S2650  
S2549  
S2654  
S2654  
S2330  
S2731  
S2765  
S2350  
S2734  
S2495  
S2381  
S2410  
S2405  
S2365  
S2125  
S2583  
S2686  
S2645  
S2338  
S2800  
S2470  
S2688  
S2261

# WNT5B

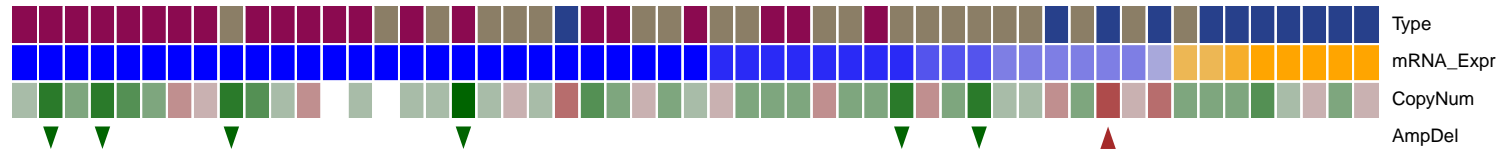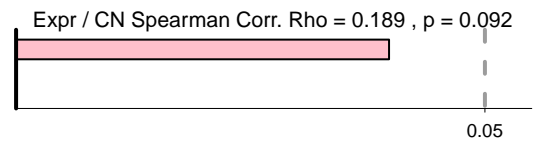

12: 1637124  
12: 1639034  
12: 1639527  
12: 1639534  
12: 1640392  
12: 1640660  
12: 1641924  
12: 1642663  
12: 1642879  
12: 1645963  
12: 1655632  
12: 1655755  
12: 1656115  
12: 1656273  
12: 1656313  
12: 1656337  
12: 1662459  
12: 1669567  
12: 1672440  
12: 1675846  
12: 1675969  
12: 1676077  
12: 1684576  
12: 1697406  
12: 1700011  
12: 1702001  
12: 1702116  
12: 1702874  
12: 1721081  
12: 1724930  
12: 1725036  
12: 1725788  
12: 1725867  
12: 1726059  
12: 1726076  
12: 1726292  
12: 1736189  
12: 1738035  
12: 1738292  
12: 1738337  
12: 1739061  
12: 1739687  
12: 1739832  
12: 1739917  
12: 1742536  
12: 1744957  
12: 1749013  
12: 1749159  
12: 1751357  
12: 1751897  
12: 1752104  
12: 1753440  
12: 1753866  
12: 1754156  
12: 1754750  
12: 1754980  
12: 1755143  
12: 1755162  
12: 1756074

GeneLoc  
PromoterAssoc  
CpGIsland

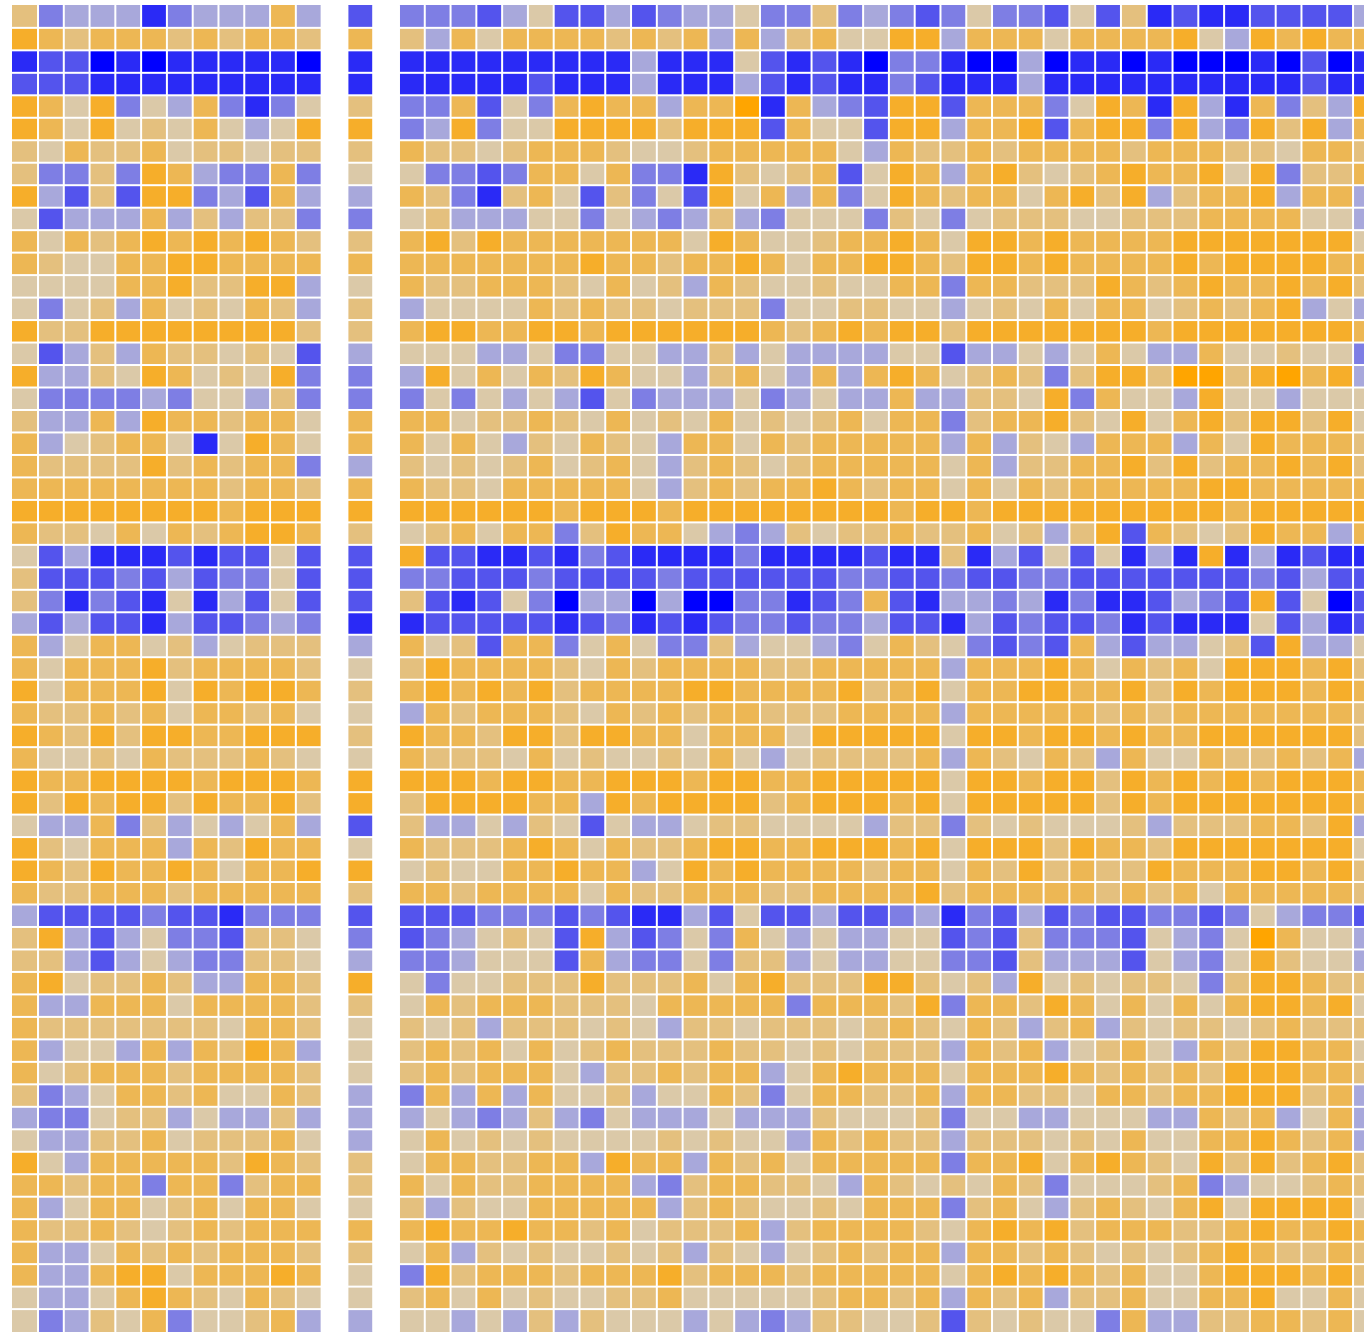

cg10234693  
cg03999434  
cg05998639  
cg05641033  
cg22549986  
cg16403102  
cg05170445  
cg20591407  
cg16017420  
cg01282725  
cg20125543  
cg06203772  
cg23797621  
cg09087087  
cg18428888  
cg21864961  
cg02046247  
cg10929582  
cg27292547  
cg06880438  
cg14375747  
cg19853333  
cg02752529  
cg15055553  
cg17824906  
cg16931076  
cg17150898  
cg22151768  
cg02664109  
cg19591105  
cg23757341  
cg09774932  
cg02035605  
cg27200267  
cg07896667  
cg24505122  
cg02063833  
cg25891078  
cg10302498  
cg10825710  
cg01525597  
cg07443287  
cg16372054  
cg23667127  
cg21497780  
cg01268901  
cg05175896  
cg25283799  
cg13186567  
cg04682969  
cg24795867  
cg20921972  
cg14527250  
cg20341251  
cg10518873  
cg12401653  
cg01053259  
cg05691934  
cg00769590

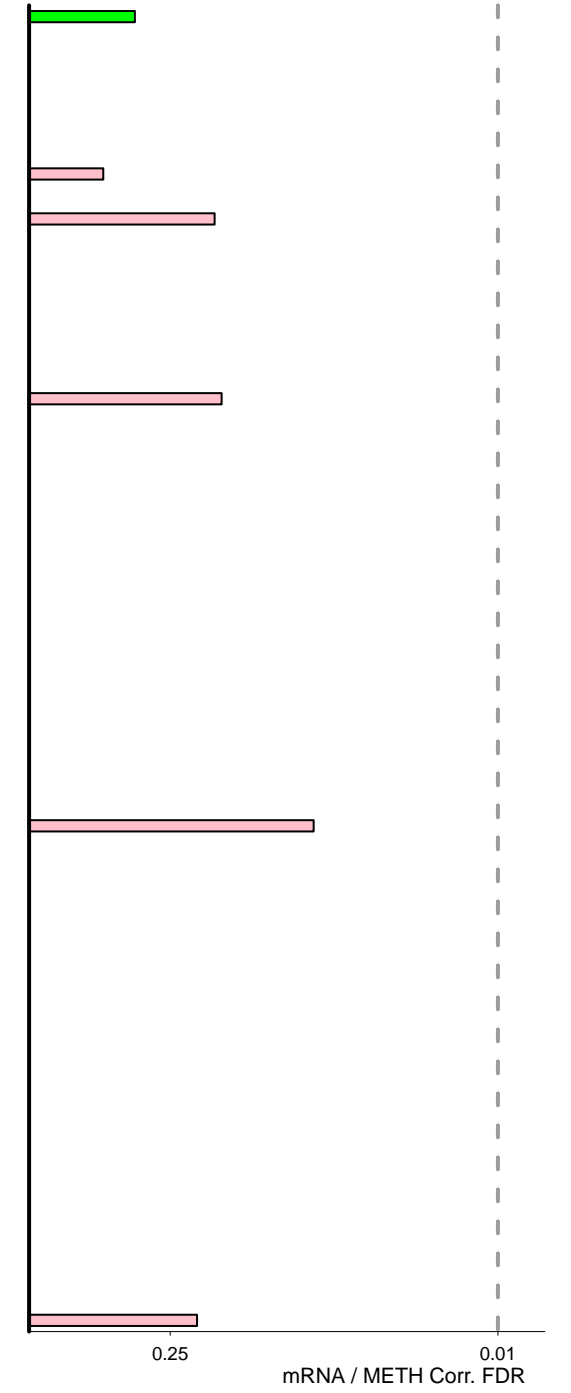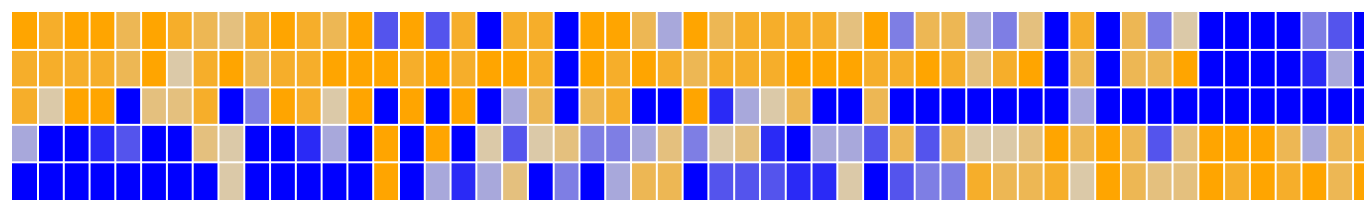

MITF  
SOX10  
TRPM1  
ZEB1  
AXL

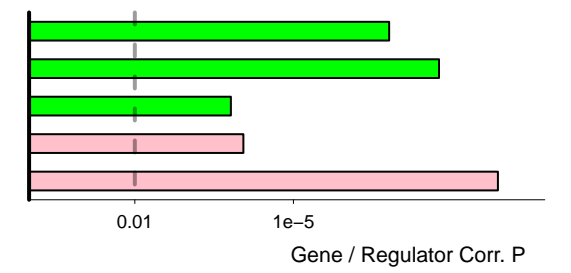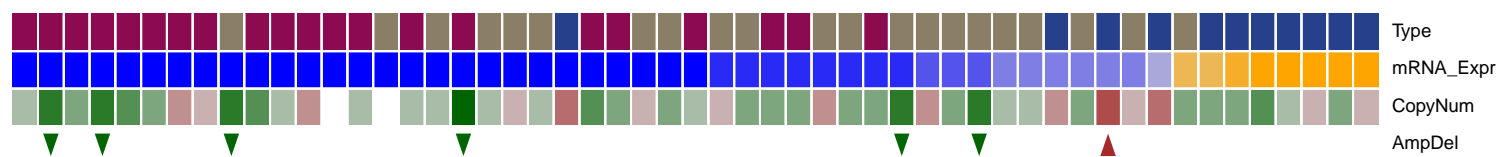

S2216  
S2189  
S2374  
S2521  
S2761  
S2279  
S2357  
S2379  
S2767  
S2373  
S2391  
S2510  
S2667  
S2400  
S2350  
S2408  
S2495  
S2330  
S2549  
S2097  
S2596  
S2686  
S2718  
S2320  
S2410  
S2650  
S2765  
S2333  
S2247  
S2668  
S2508  
S2734  
S2812  
S2406  
S2645  
S2392  
S2380  
S2800  
S2654  
S2153  
S2470  
S2381  
S2770A  
S2423  
S2405  
S2365  
S2356  
S2261  
S2125  
S2338  
S2731  
S2583  
S2688

Type  
mRNA\_Expr  
CopyNum  
AmpDel

# SLIT2

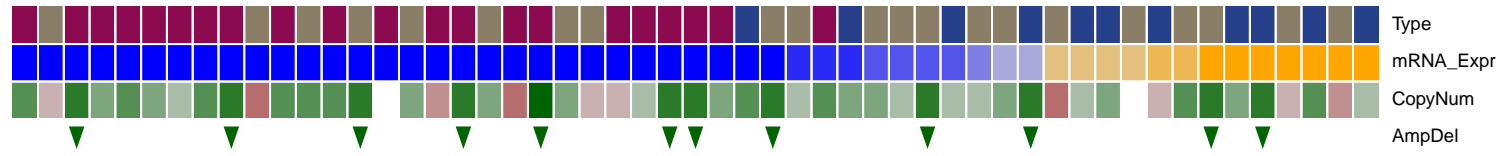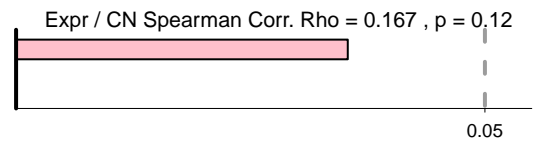

4 : 20253130  
 4 : 20253514  
 4 : 20253556  
 4 : 20253595  
 4 : 20253922  
 4 : 20254140  
 4 : 20254519  
 4 : 20254736  
 4 : 20255061  
 4 : 20255082  
 4 : 20255187  
 4 : 20255264  
 4 : 20255343  
 4 : 20255805  
 4 : 20255985  
 4 : 20256326  
 4 : 20256841  
 4 : 20257590  
 4 : 20259899  
 4 : 20285577  
 4 : 20335836  
 4 : 20393304  
 4 : 20396867  
 4 : 20528506  
 4 : 20529659  
 4 : 20529748  
 4 : 20529785  
 4 : 20529994  
 4 : 20558003  
 4 : 20574555

GeneLoc  
 PromoterAssoc  
 CpGIsland

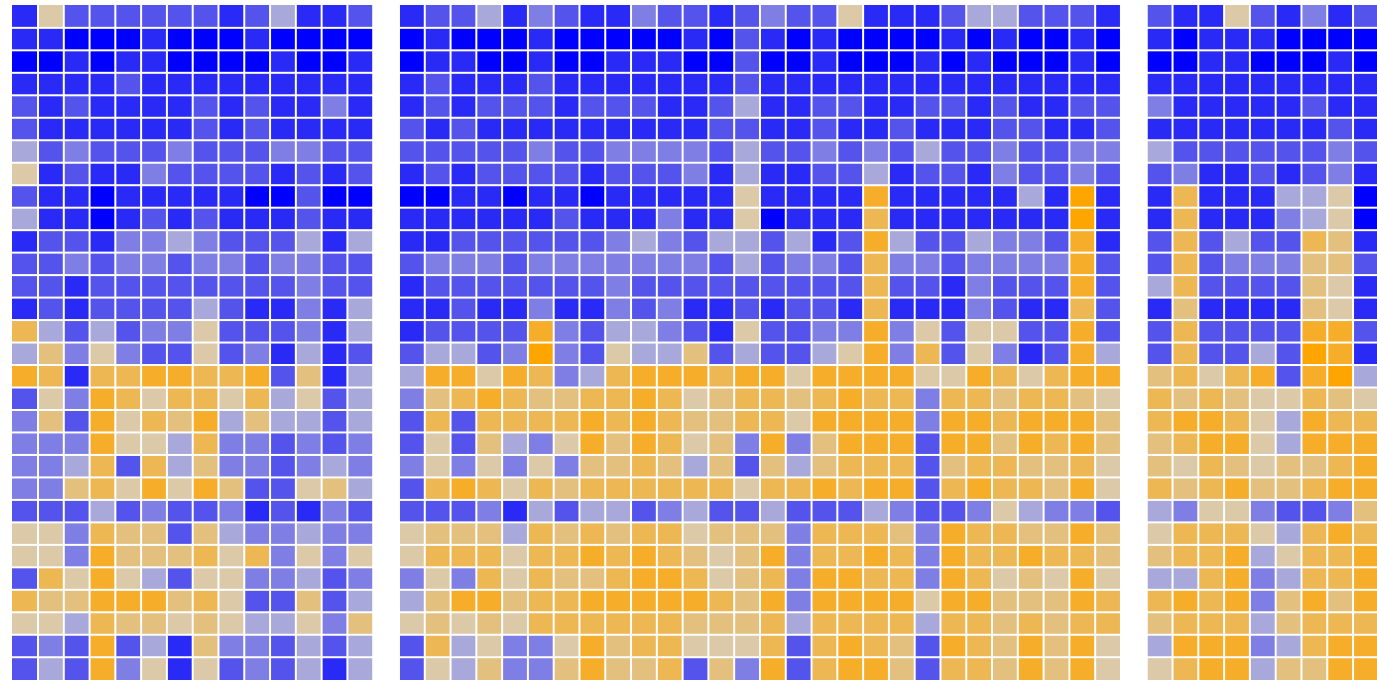

cg10946669  
 cg13755796  
 cg10322724  
 cg01281776  
 cg23412793  
 cg10577006  
 cg09781944  
 cg18972811  
 cg13281139  
 cg13078140  
 cg15469350  
 cg03742003  
 cg08428452  
 cg13485685  
 cg20928234  
 cg03790250  
 cg03260566  
 cg19940312  
 cg26164897  
 cg10947633  
 cg12401640  
 cg26854559  
 cg07290920  
 cg21129041  
 cg00749969  
 cg10603296  
 cg07711036  
 cg22508905  
 cg12899614  
 cg08415391

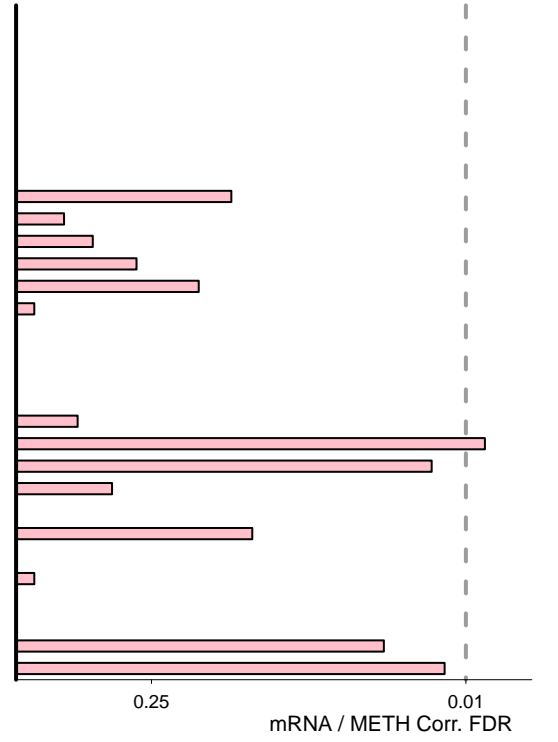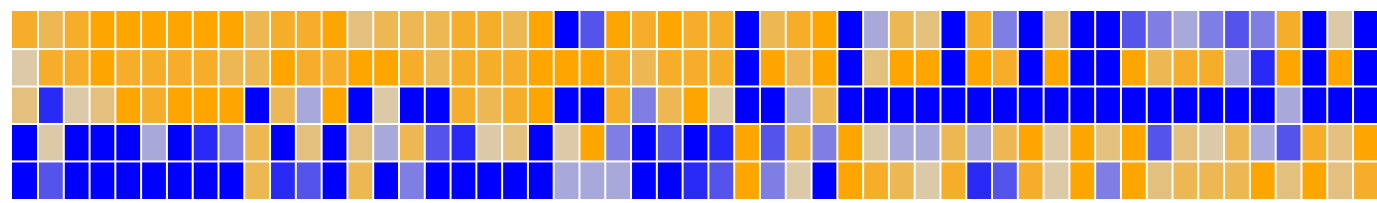

MITF  
 SOX10  
 TRPM1  
 ZEB1  
 AXL

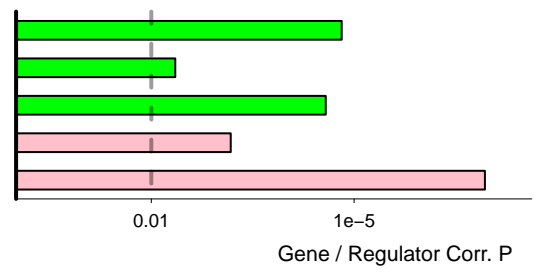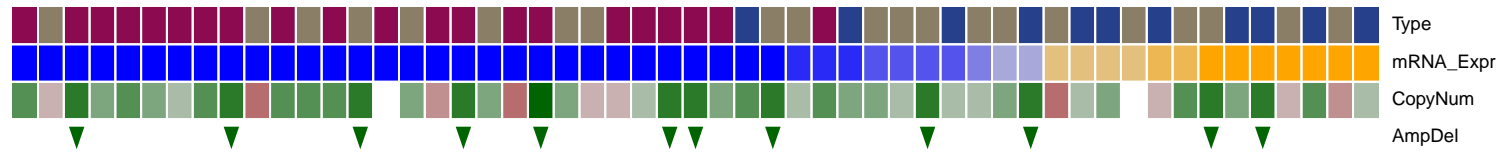

S2357  
 S2333  
 S2189  
 S2279  
 S2391  
 S2216  
 S2408  
 S2521  
 S2765  
 S2423  
 S2508  
 S2247  
 S2374  
 S2153  
 S2667  
 S2380  
 S2761  
 S2510  
 S2596  
 S2379  
 S2400  
 S2549  
 S2495  
 S2320  
 S2373  
 S2406  
 S2330  
 S2668  
 S2770A  
 S2392  
 S2381  
 S2718  
 S2356  
 S2800  
 S2410  
 S2812  
 S2338  
 S2734  
 S2645  
 S2470  
 S2767  
 S2125  
 S2686  
 S2350  
 S2405  
 S2650  
 S2654  
 S2583  
 S2731  
 S2097  
 S2688  
 S2365  
 S2261

Type  
 mRNA\_Expr  
 CopyNum  
 AmpDel

# LTBP2

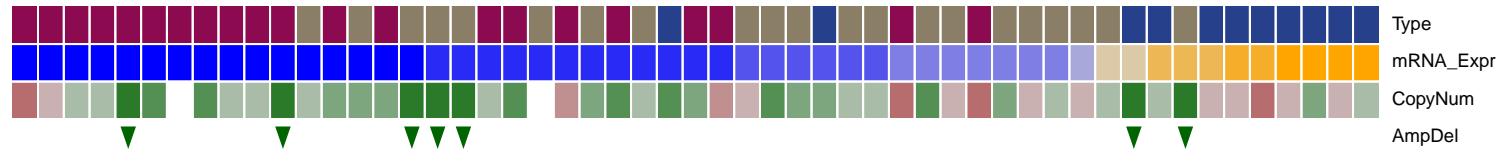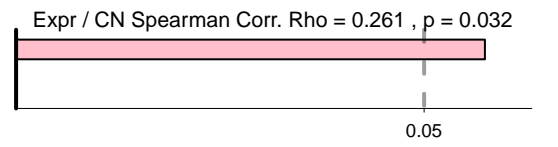

14 : 75079986  
 14 : 75079491  
 14 : 75079121  
 14 : 75079072  
 14 : 75078842  
 14 : 75078834  
 14 : 75078611  
 14 : 75078283  
 14 : 75077385  
 14 : 75075712  
 14 : 75073928  
 14 : 75072120  
 14 : 75070395  
 14 : 75056479  
 14 : 75053567  
 14 : 75052737  
 14 : 75052717  
 14 : 75052677  
 14 : 75052674  
 14 : 75052601  
 14 : 75050884  
 14 : 75050528  
 14 : 75043777  
 14 : 75039090  
 14 : 75034677  
 14 : 75025713  
 14 : 75018906  
 14 : 75013390  
 14 : 74992018  
 14 : 74968209

GeneLoc  
 PromoterAssoc  
 CpGIsland

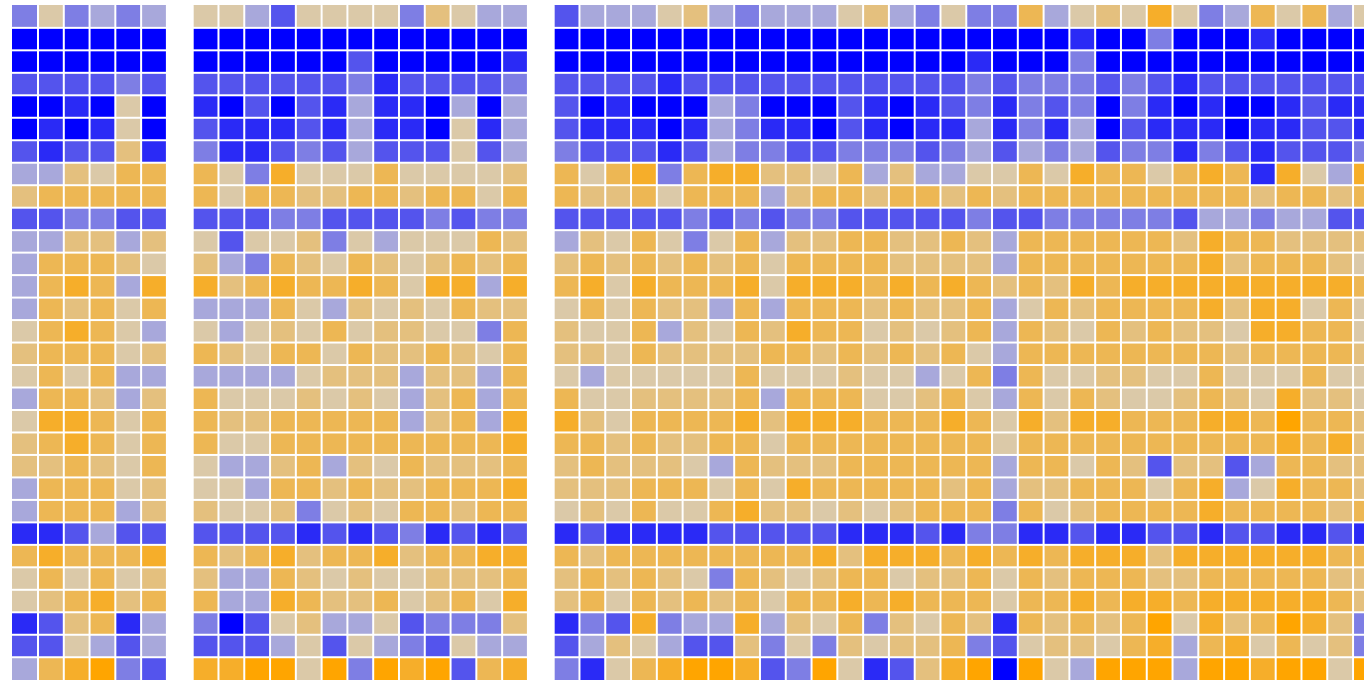

cg08299089  
 cg26126052  
 cg26273150  
 cg06217862  
 cg20718816  
 cg12921961  
 cg03802461  
 cg15926671  
 cg17335494  
 cg12153422  
 cg03491087  
 cg14340889  
 cg18835656  
 cg08189843  
 cg09331879  
 cg11718443  
 cg14986500  
 cg20375122  
 cg16239257  
 cg26011692  
 cg25980489  
 cg18837429  
 cg16056219  
 cg26084949  
 cg17347104  
 cg05292605  
 cg24164786  
 cg07531056  
 cg11114503  
 cg27317046

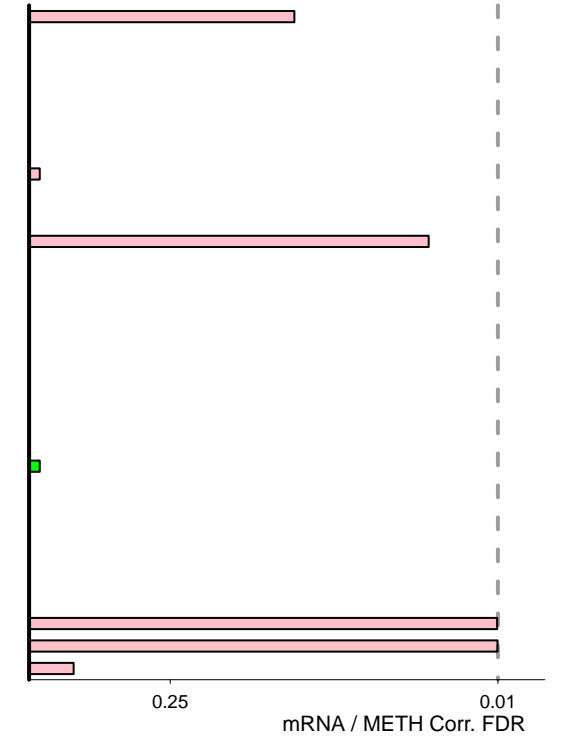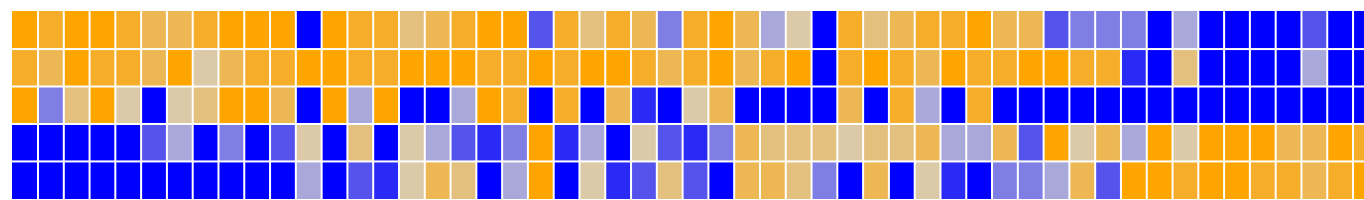

MITF  
 SOX10  
 TRPM1  
 ZEB1  
 AXL

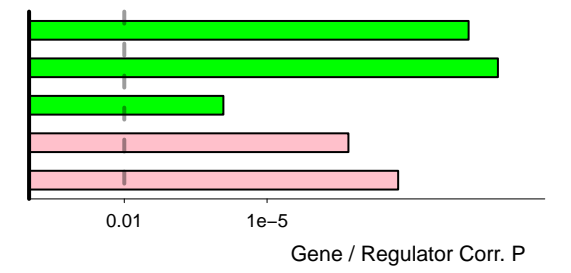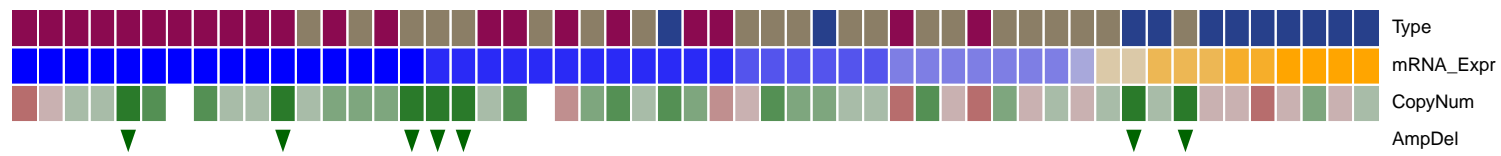

S2374  
 S2373  
 S2279  
 S2391  
 S2189  
 S2761  
 S2667  
 S2357  
 S2765  
 S2408  
 S2406  
 S2549  
 S2400  
 S2247  
 S2330  
 S2767  
 S2410  
 S2097  
 S2521  
 S2320  
 S2350  
 S2510  
 S2812  
 S2508  
 S2333  
 S2405  
 S2668  
 S2718  
 S2423  
 S2650  
 S2365  
 S2686  
 S2596  
 S2153  
 S2379  
 S2381  
 S2734  
 S2216  
 S2380  
 S2392  
 S2495  
 S2654  
 S2645  
 S2731  
 S2356  
 S2800  
 S2770A  
 S2125  
 S2470  
 S2338  
 S2583  
 S2261  
 S2688



# PLAU

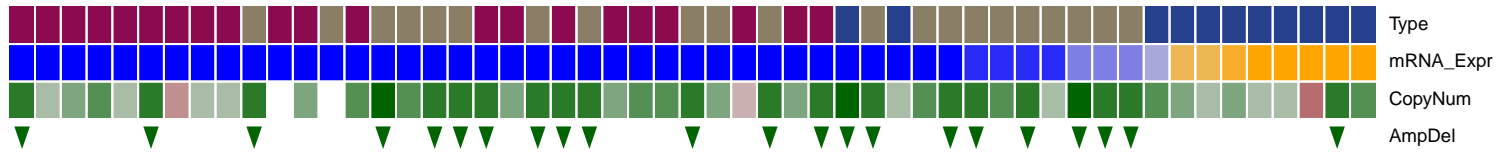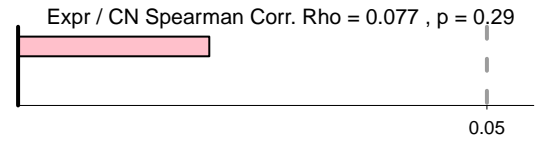

10 : 75669647  
 10 : 75670435  
 10 : 75670653  
 10 : 75670677  
 10 : 75670697  
 10 : 75670714  
 10 : 75670731  
 10 : 75670766  
 10 : 75670793  
 10 : 75670903  
 10 : 75671195  
 10 : 75671378  
 10 : 75671462  
 10 : 75672723  
 10 : 75674740  
 10 : 75675024  
 10 : 75677011

GeneLoc  
 PromoterAssoc  
 CpGIsland

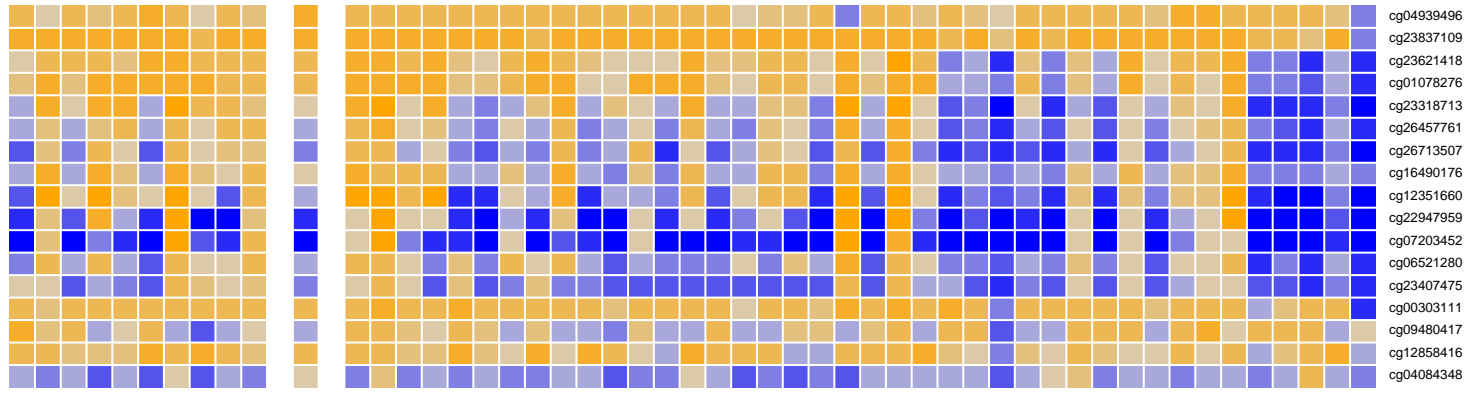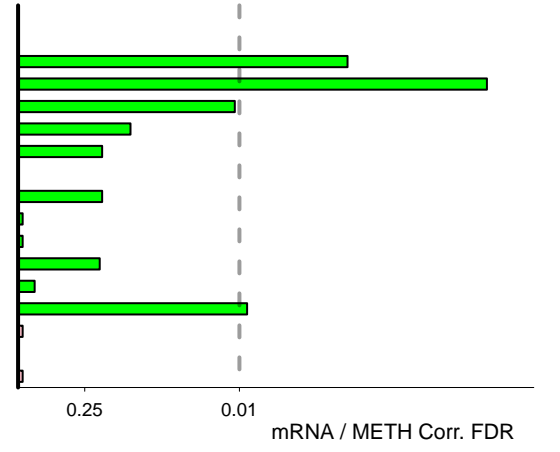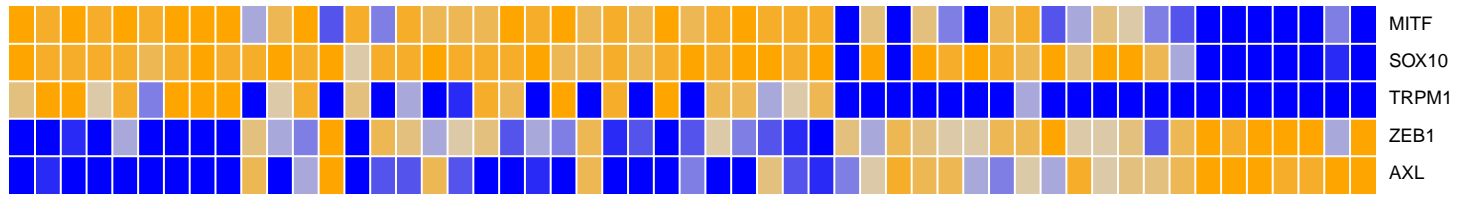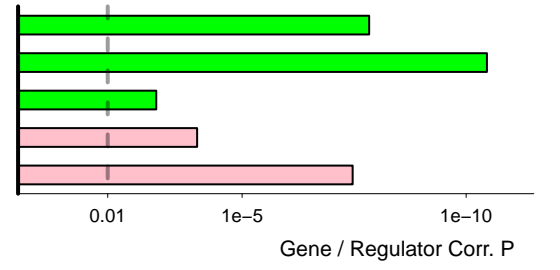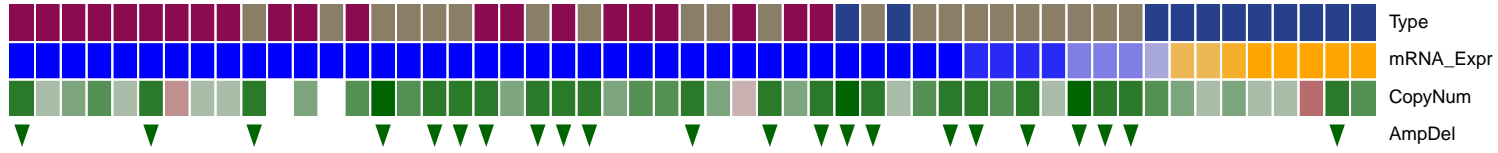

S2279  
 S2330  
 S2521  
 S2189  
 S2216  
 S2373  
 S2391  
 S2400  
 S2408  
 S2650  
 S2667  
 S2320  
 S2350  
 S2357  
 S2645  
 S2247  
 S2410  
 S2333  
 S2379  
 S2406  
 S2734  
 S2765  
 S2423  
 S2510  
 S2761  
 S2374  
 S2392  
 S2596  
 S2718  
 S2097  
 S2668  
 S2508  
 S2686  
 S2812  
 S2338  
 S2153  
 S2654  
 S2549  
 S2380  
 S2381  
 S2495  
 S2800  
 S2767  
 S2365  
 S2405  
 S2583  
 S2125  
 S2688  
 S2356  
 S2261  
 S2470  
 S2731  
 S2770A

# ADAM12

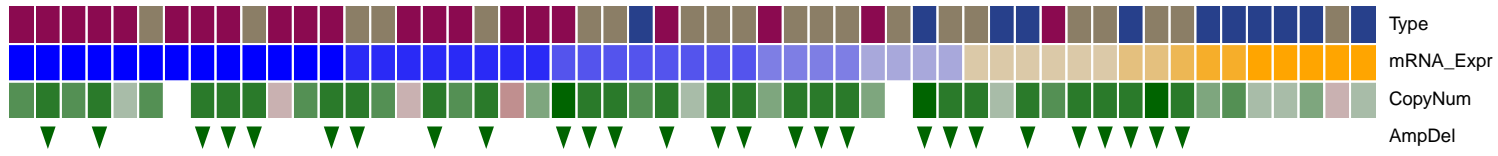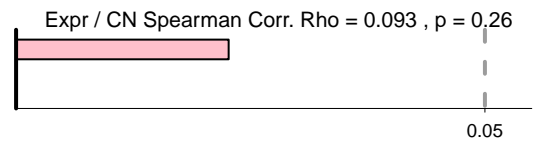

10 : 128077376  
 10 : 128077369  
 10 : 128077323  
 10 : 128077318  
 10 : 128077315  
 10 : 128077307  
 10 : 128077080  
 10 : 128076941  
 10 : 128076936  
 10 : 128076910  
 10 : 128076308  
 10 : 128076260  
 10 : 128075923  
 10 : 128075852  
 10 : 128074961  
 10 : 128039279  
 10 : 128021421  
 10 : 128021359  
 10 : 128021322  
 10 : 128014684  
 10 : 127999713  
 10 : 127991159  
 10 : 127941989  
 10 : 127936505  
 10 : 127916927  
 10 : 127915358  
 10 : 127914098  
 10 : 127914071  
 10 : 127904472  
 10 : 127897162  
 10 : 127888073  
 10 : 127870500  
 10 : 127864751  
 10 : 127843646  
 10 : 127836603  
 10 : 127824504  
 10 : 127823065  
 10 : 127812674  
 10 : 127789788  
 10 : 127779842  
 10 : 127769903  
 10 : 127769491  
 10 : 127750970  
 10 : 127738328  
 10 : 127730564  
 10 : 127702584

GeneLoc  
 PromoterAssoc  
 CpGIsland

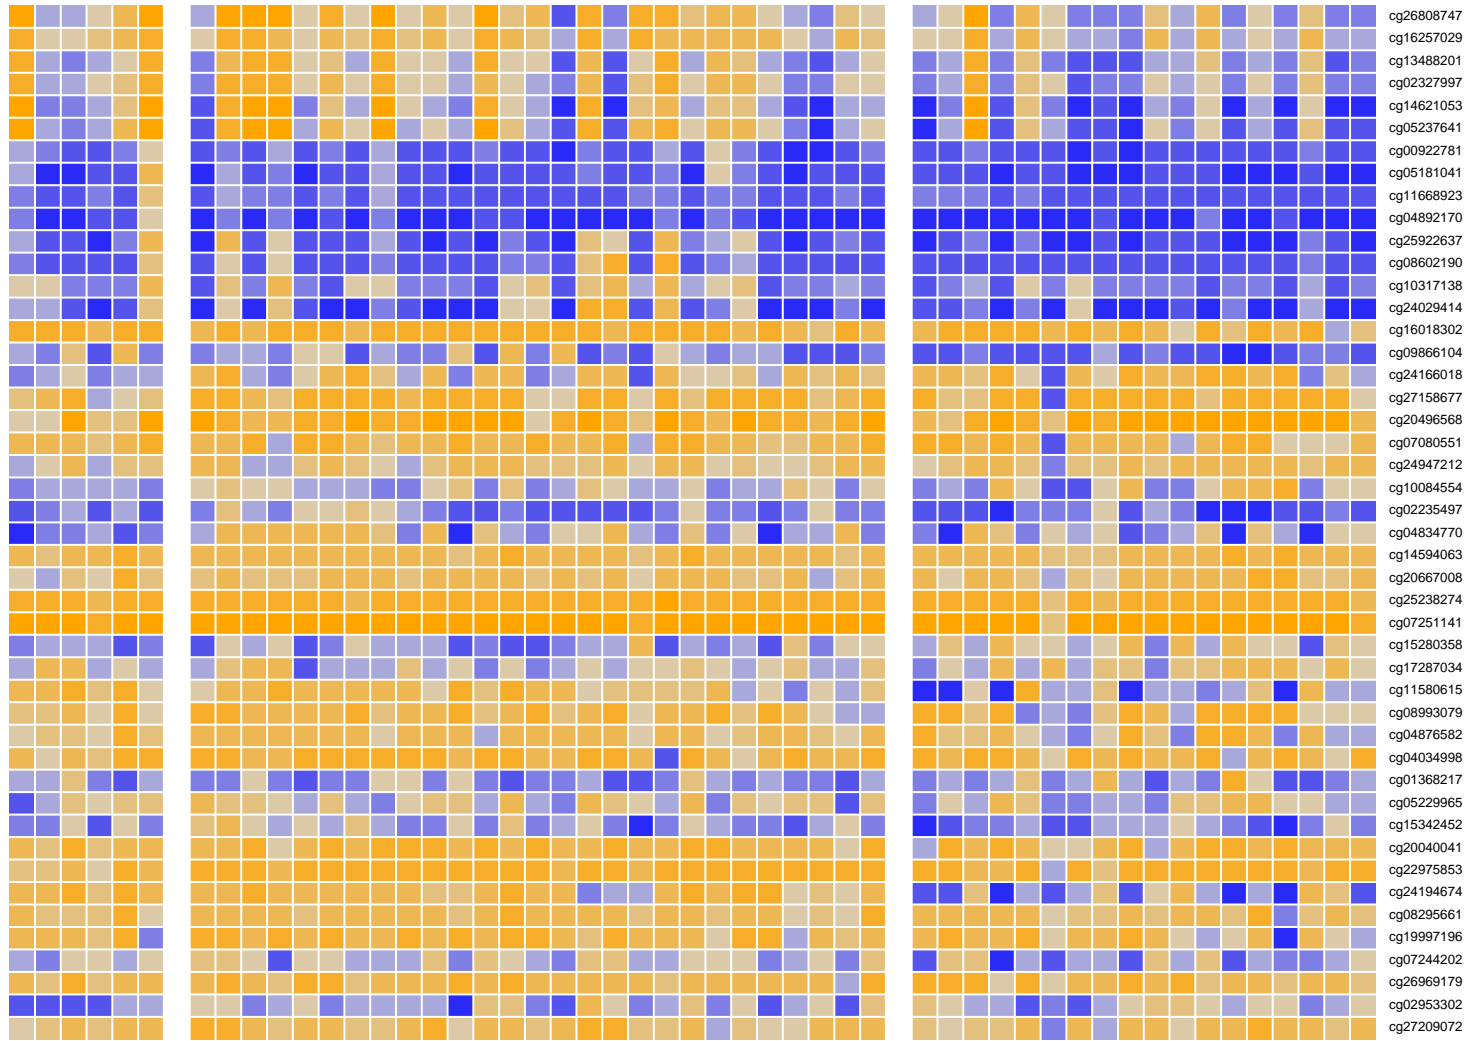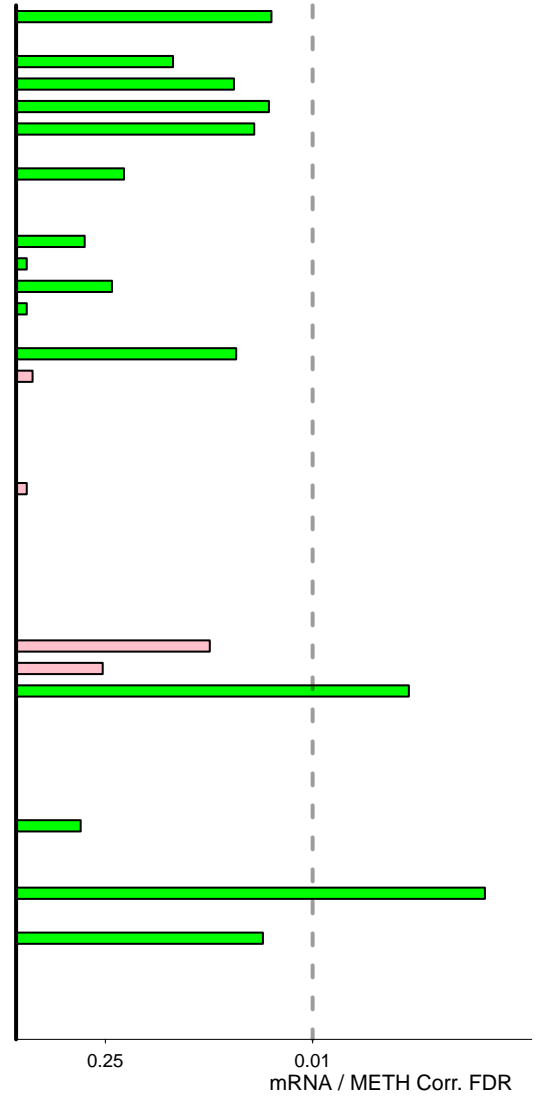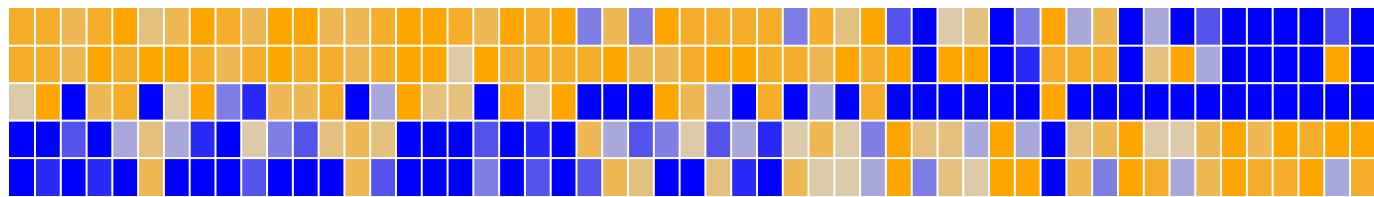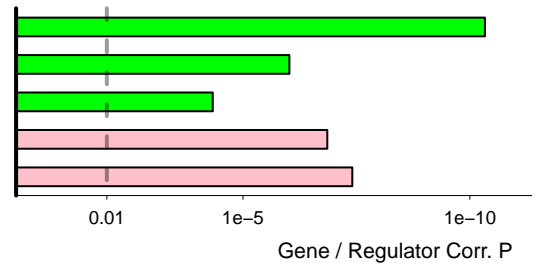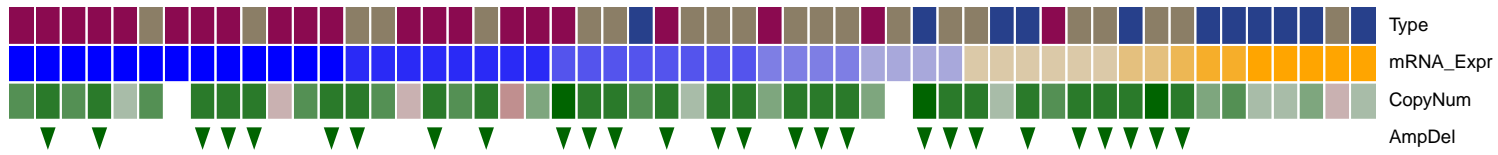

S2189  
 S2330  
 S2761  
 S2508  
 S2216  
 S2153  
 S2667  
 S2521  
 S2373  
 S2333  
 S2718  
 S2406  
 S2379  
 S2423  
 S2247  
 S2400  
 S2279  
 S2357  
 S2392  
 S2391  
 S2668  
 S2408  
 S2645  
 S2410  
 S2405  
 S2765  
 S2596  
 S2097  
 S2734  
 S2510  
 S2654  
 S2381  
 S2767  
 S2320  
 S2350  
 S2686  
 S2365  
 S2812  
 S2356  
 S2731  
 S2374  
 S2650  
 S2380  
 S2125  
 S2800  
 S2549  
 S2583  
 S2770A  
 S2338  
 S2470  
 S2688  
 S2495  
 S2261

# SDC4

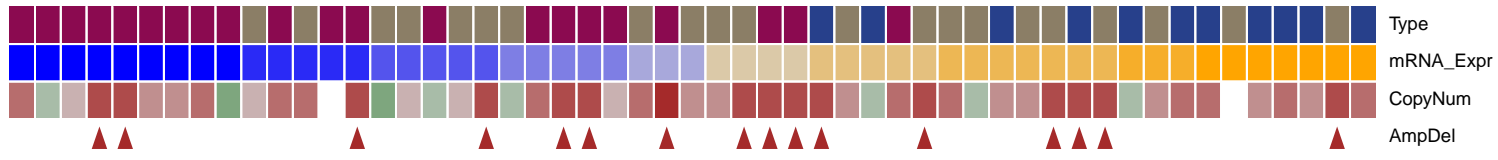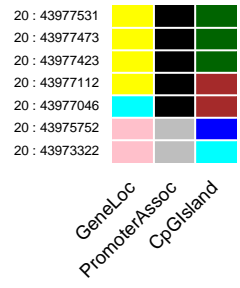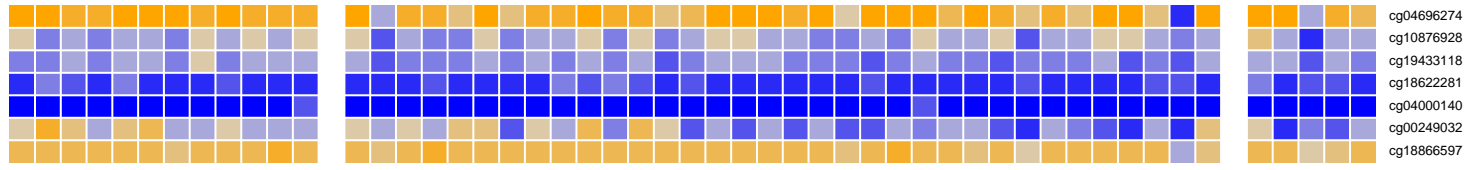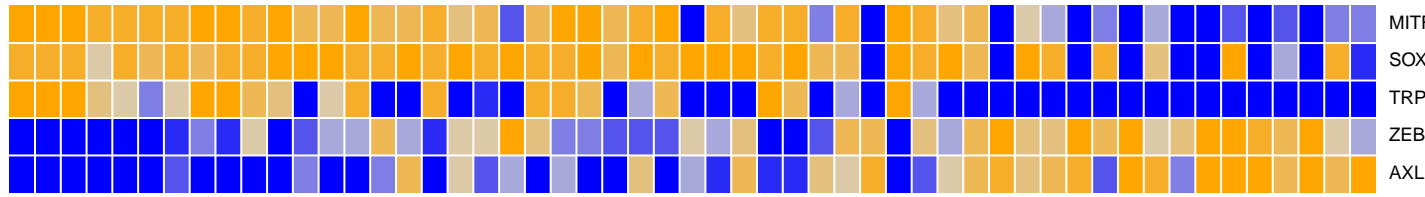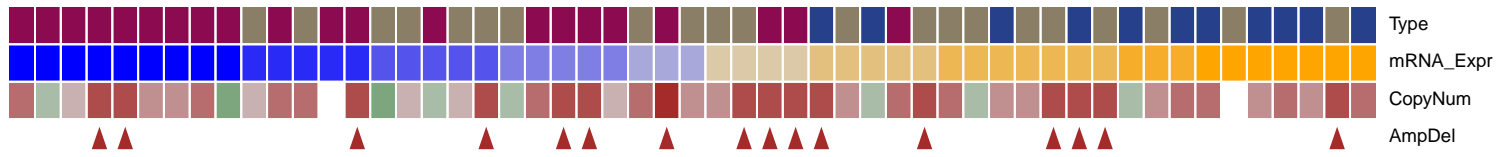

S2374  
S2408  
S2391  
S2357  
S2189  
S2373  
S2668  
S2765  
S2521  
S2596  
S2279  
S2392  
S2667  
S2216  
S2380  
S2410  
S2510  
S2767  
S2333  
S2495  
S2379  
S2320  
S2718  
S2761  
S2097  
S2406  
S2549  
S2734  
S2153  
S2330  
S2508  
S2405  
S2381  
S2338  
S2400  
S2247  
S2812  
S2423  
S2470  
S2365  
S2650  
S2261  
S2645  
S2356  
S2800  
S2686  
S2770A  
S2350  
S2688  
S2583  
S2125  
S2654  
S2731

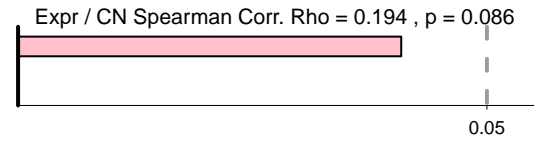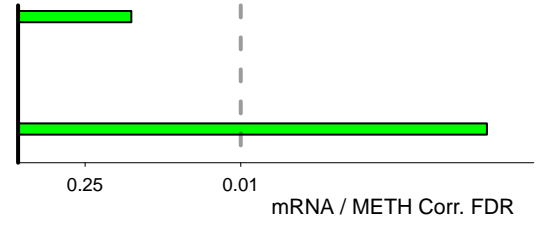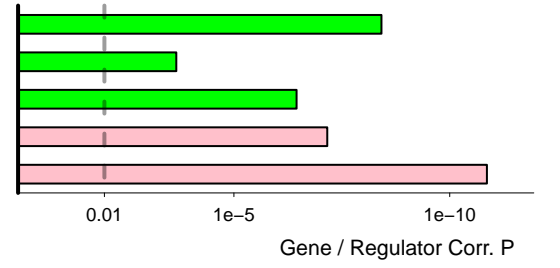

# GLIPR1

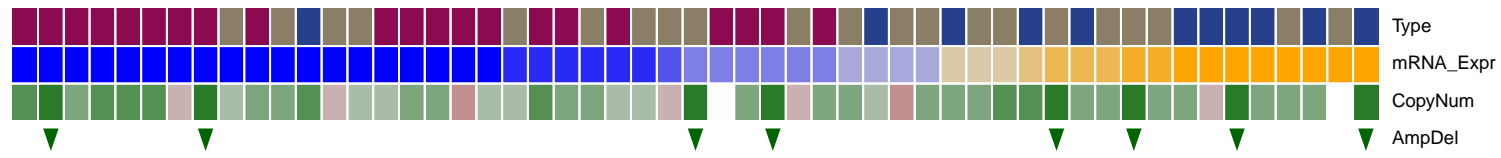

12: 75873673  
 12: 75874499  
 12: 75874556  
 12: 75878019

GeneLoc  
 PromoterAssoc  
 CpGIsland

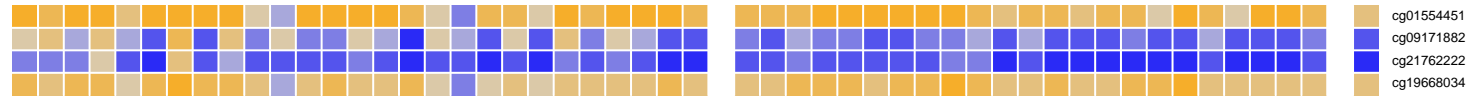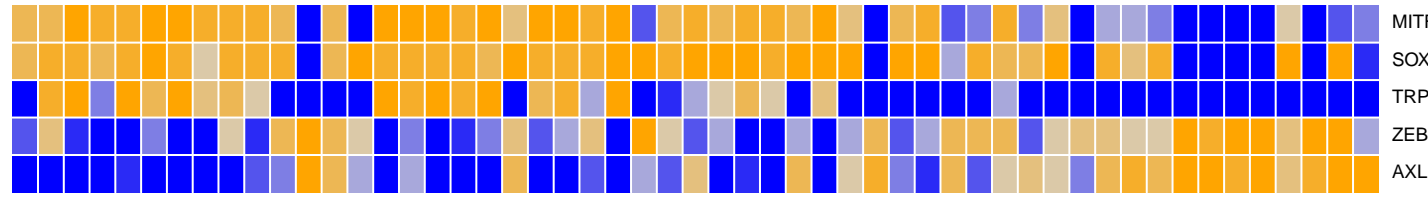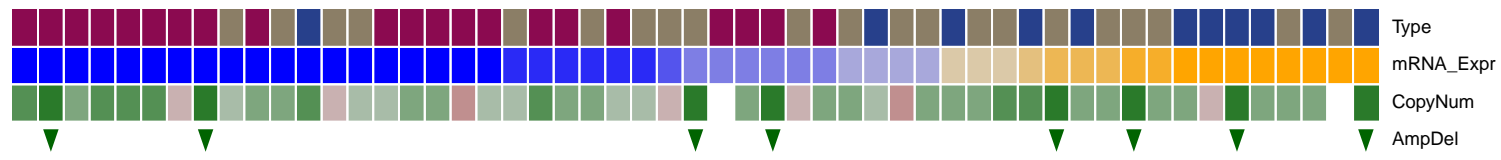

S2761  
 S2379  
 S2521  
 S2373  
 S2330  
 S2718  
 S2391  
 S2357  
 S2596  
 S2668  
 S2380  
 S2770A  
 S2423  
 S2549  
 S2408  
 S2320  
 S2374  
 S2510  
 S2765  
 S2153  
 S2406  
 S2216  
 S2247  
 S2400  
 S2495  
 S2333  
 S2097  
 S2667  
 S2508  
 S2189  
 S2410  
 S2279  
 S2812  
 S2338  
 S2392  
 S2734  
 S2583  
 S2645  
 S2381  
 S2405  
 S2767  
 S2686  
 S2650  
 S2800  
 S2654  
 S2356  
 S2688  
 S2470  
 S2125  
 S2365  
 S2261  
 S2350  
 S2731

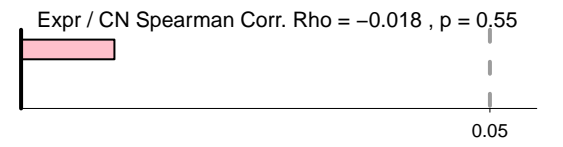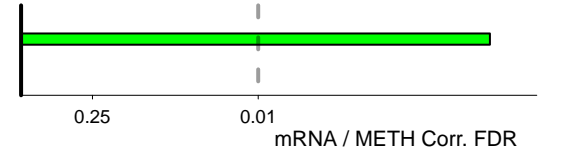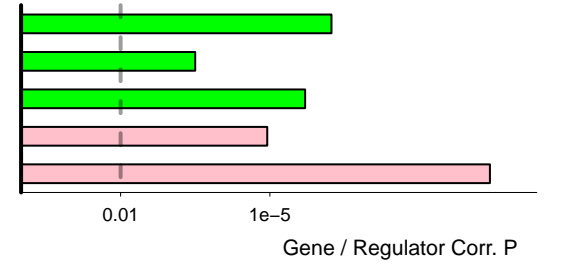

# NTN4

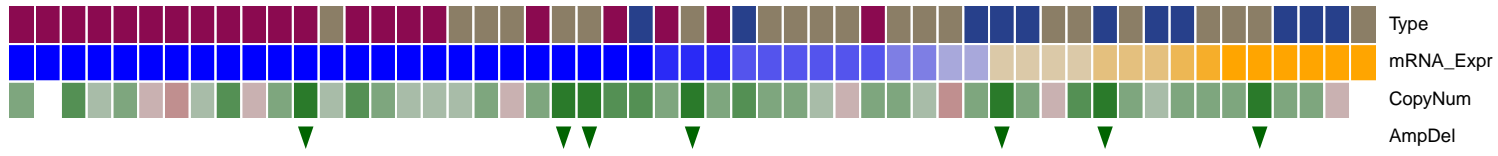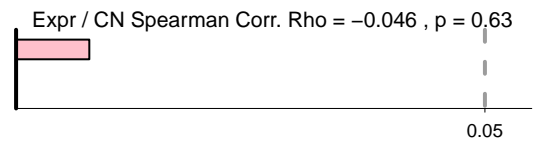

12 : 96185437  
 12 : 96185283  
 12 : 96184965  
 12 : 96184815  
 12 : 96184799  
 12 : 96184787  
 12 : 96184580  
 12 : 96184558  
 12 : 96184020  
 12 : 96183791  
 12 : 96183525  
 12 : 96183466  
 12 : 96183197  
 12 : 96180994  
 12 : 96177524  
 12 : 96161502  
 12 : 96158732  
 12 : 96149803  
 12 : 96127072  
 12 : 96113161  
 12 : 96099778  
 12 : 96094182  
 12 : 96069024  
 12 : 96052514

GeneLoc  
 PromoterAssoc  
 CpIsland

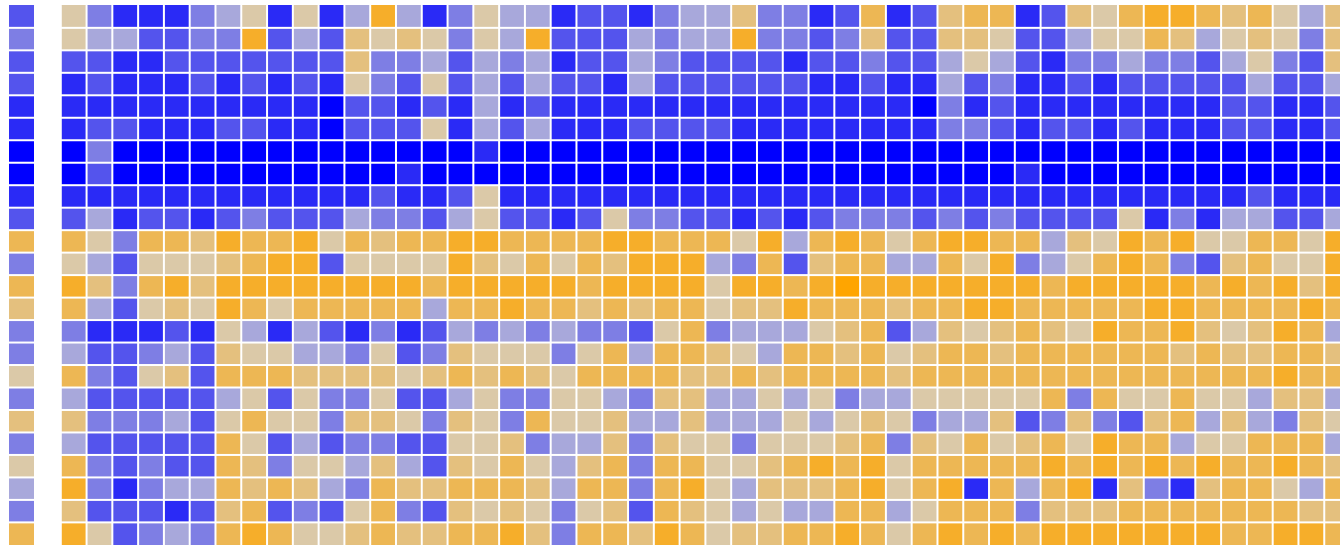

cg03100449  
 cg24790471  
 cg07461318  
 cg12785090  
 cg23193116  
 cg22828900  
 cg04738301  
 cg15367106  
 cg16829450  
 cg25253534  
 cg14189750  
 cg09894284  
 cg26584545  
 cg25741829  
 cg08535361  
 cg04923773  
 cg10205146  
 cg02765535  
 cg25367249  
 cg16318311  
 cg13560030  
 cg14280382  
 cg10964388  
 cg19013339

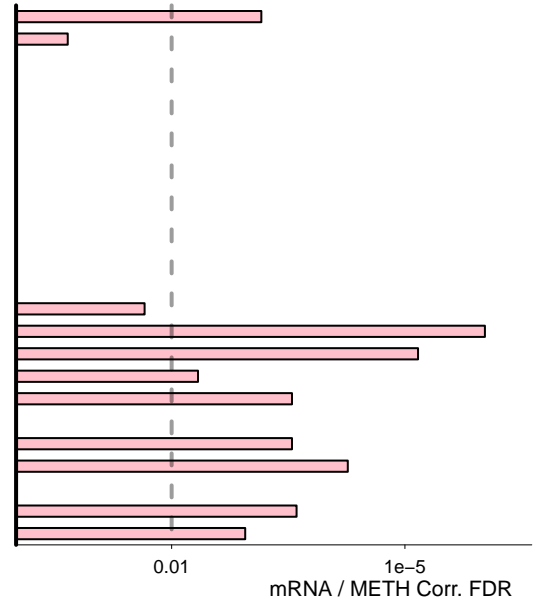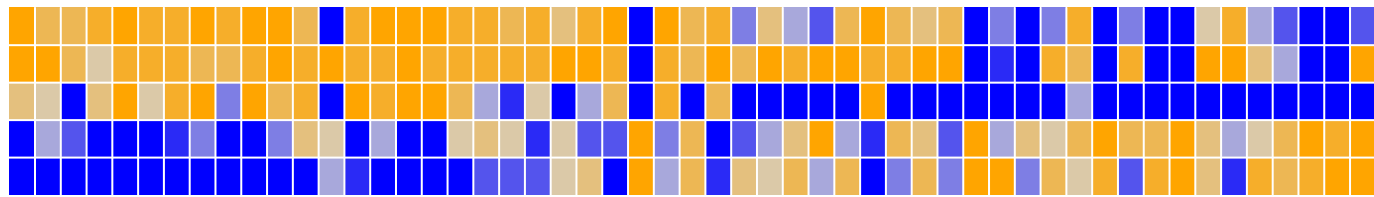

MITF  
 SOX10  
 TRPM1  
 ZEB1  
 AXL

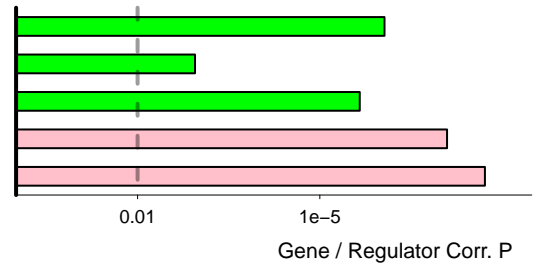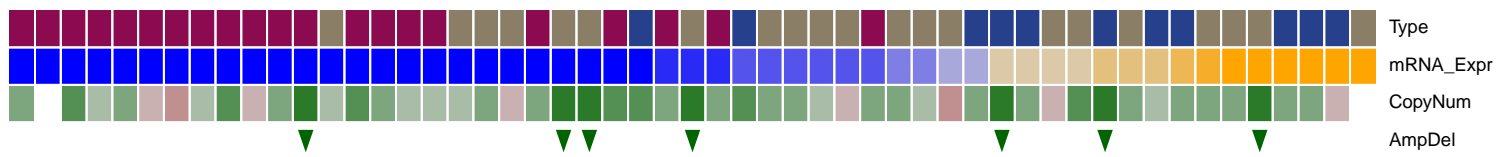

S2279  
 S2667  
 S2761  
 S2357  
 S2374  
 S2189  
 S2510  
 S2765  
 S2373  
 S2391  
 S2718  
 S2379  
 S2549  
 S2330  
 S2216  
 S2400  
 S2408  
 S2596  
 S2247  
 S2333  
 S2668  
 S2767  
 S2097  
 S2406  
 S2770A  
 S2320  
 S2423  
 S2508  
 S2405  
 S2812  
 S2650  
 S2495  
 S2410  
 S2521  
 S2380  
 S2153  
 S2392  
 S2356  
 S2731  
 S2686  
 S2654  
 S2381  
 S2470  
 S2645  
 S2338  
 S2125  
 S2365  
 S2734  
 S2800  
 S2583  
 S2261  
 S2688  
 S2350

# TCF4

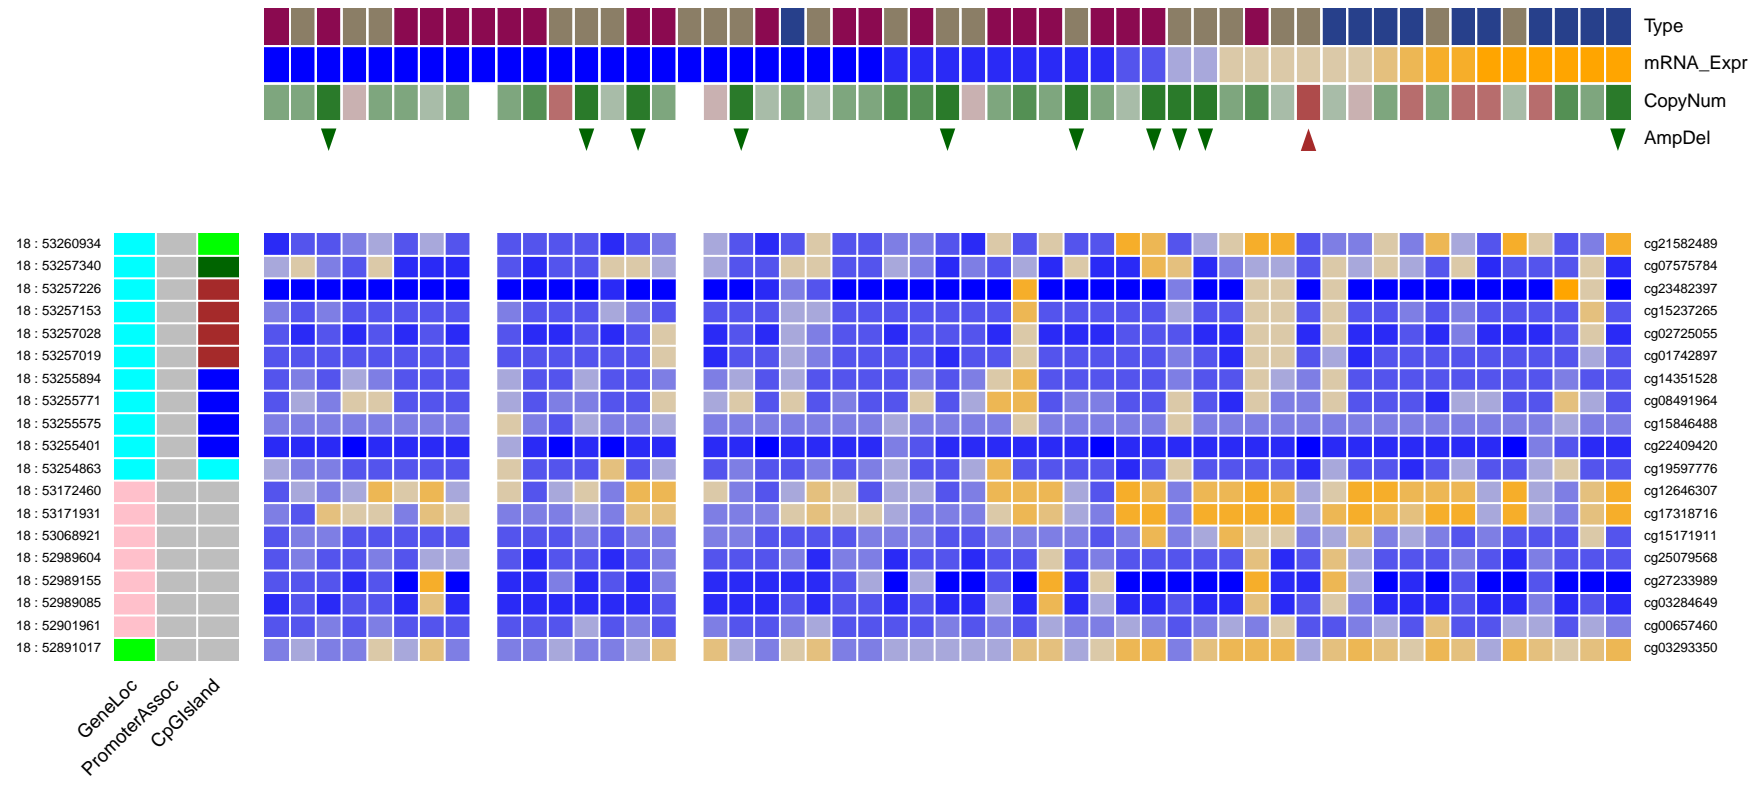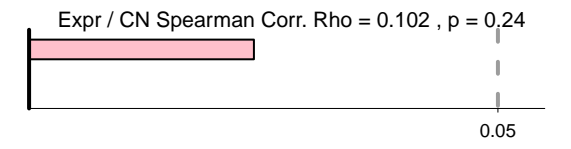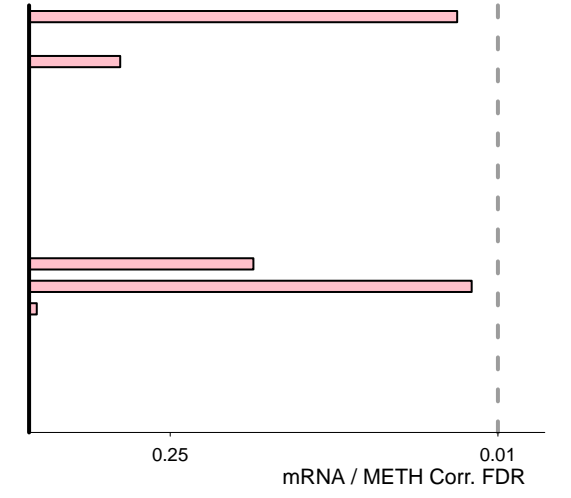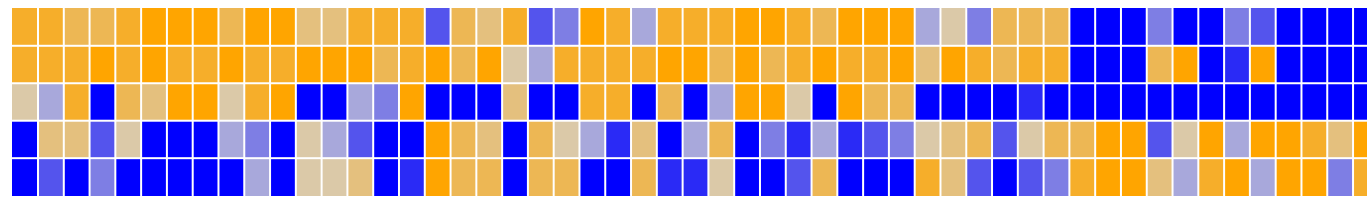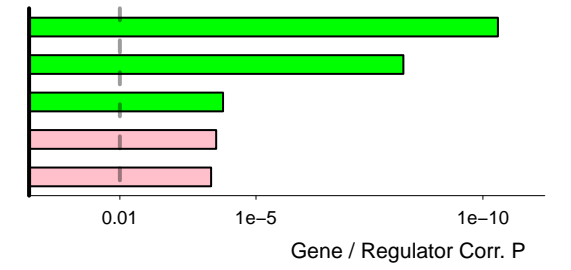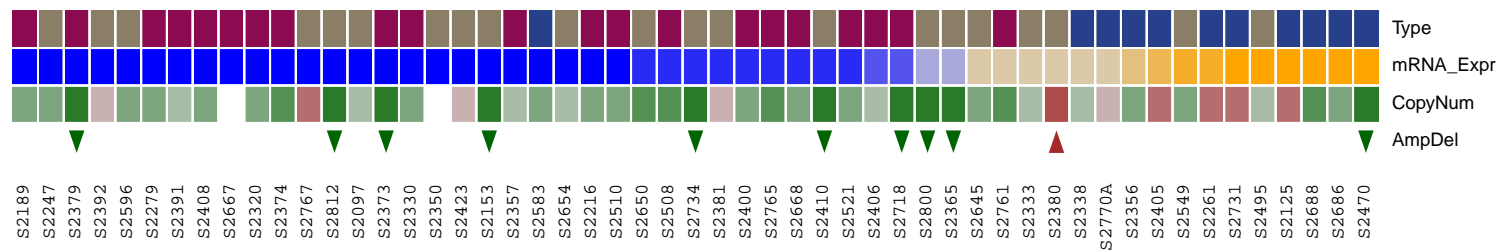

# EPHA2

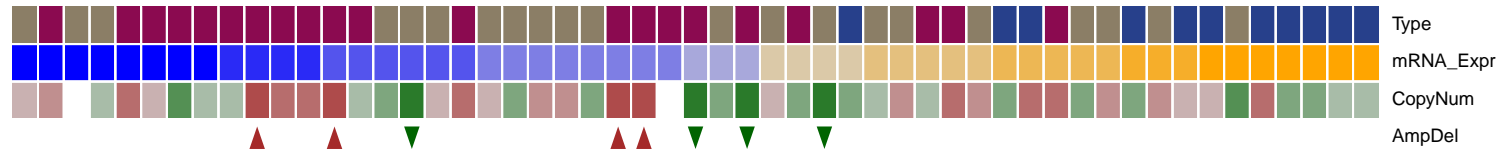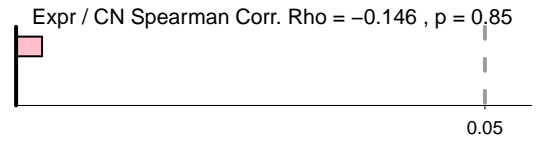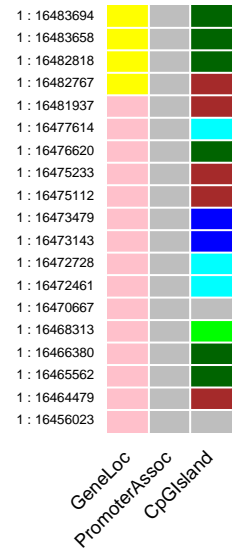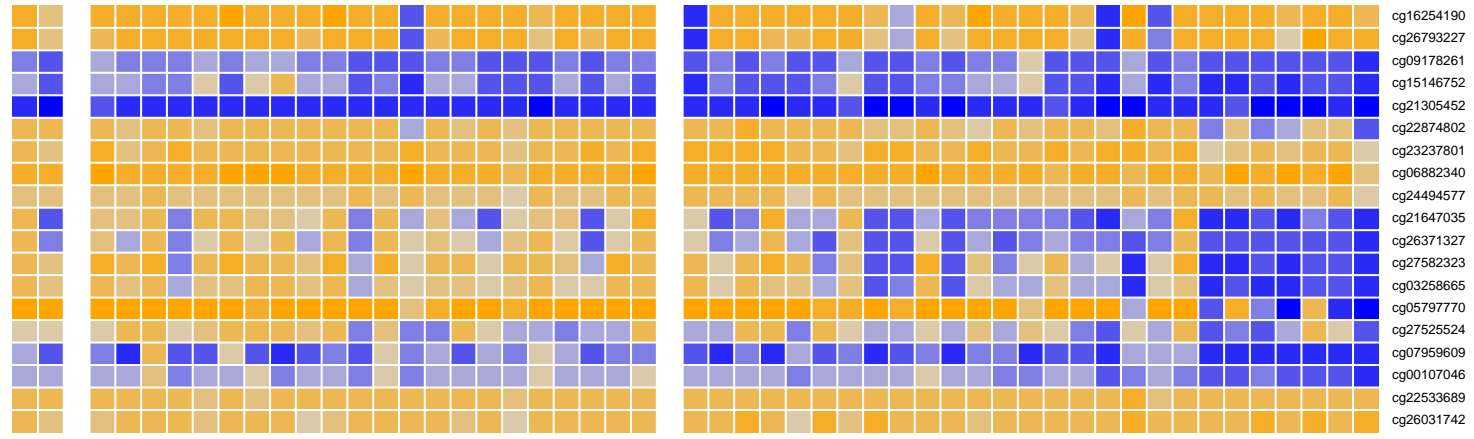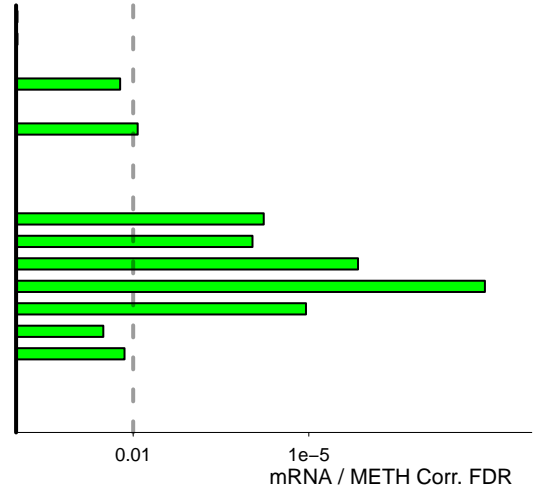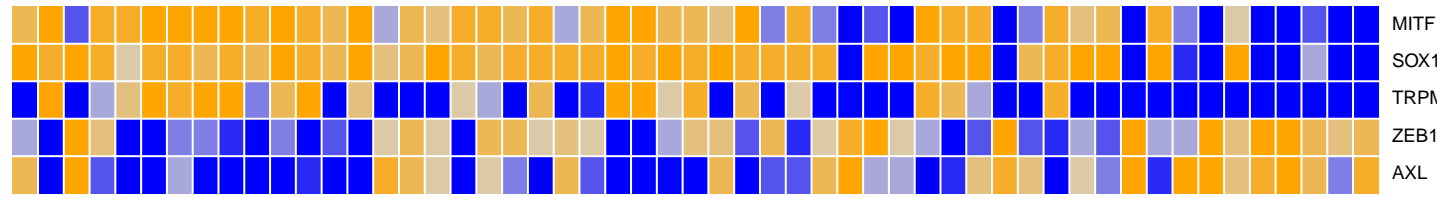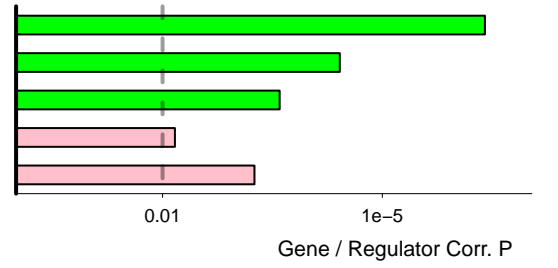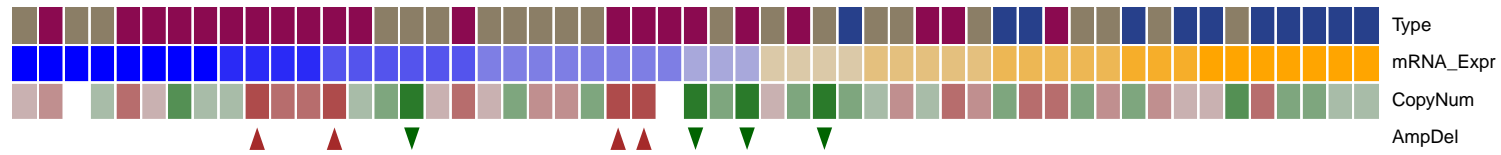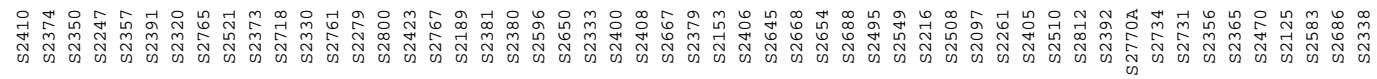

# GBP3

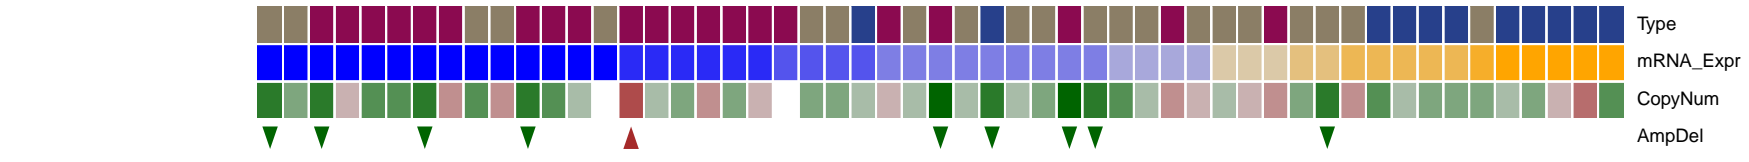

1: 89490034  
 1: 89488430  
 1: 89473148

GeneLoc  
 PromoterAssoc  
 CpGIsland

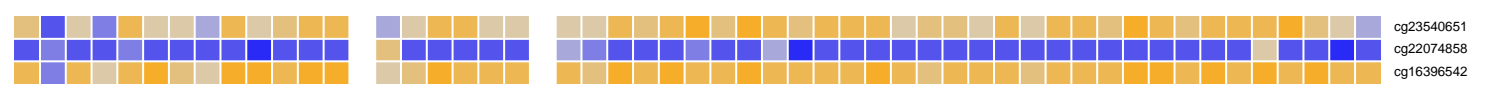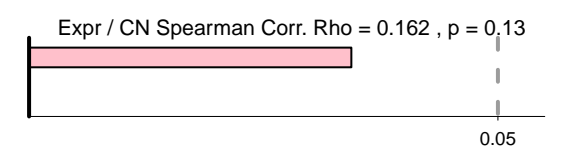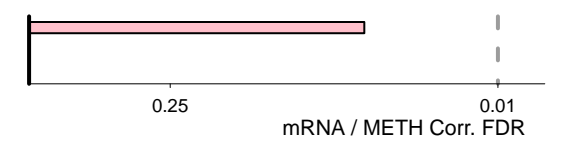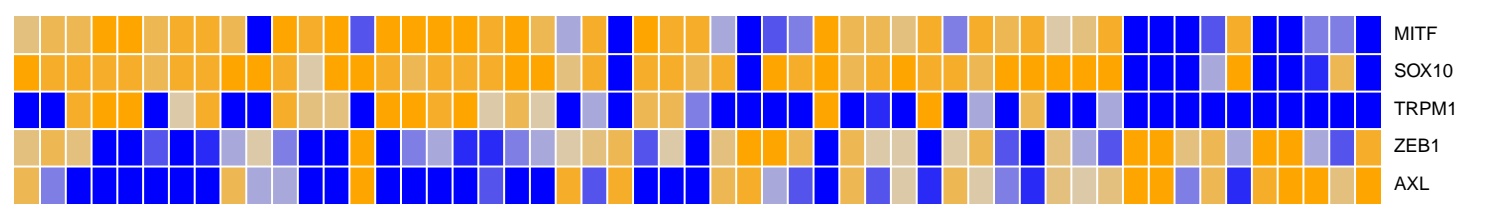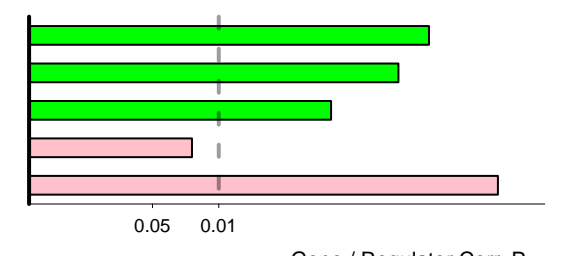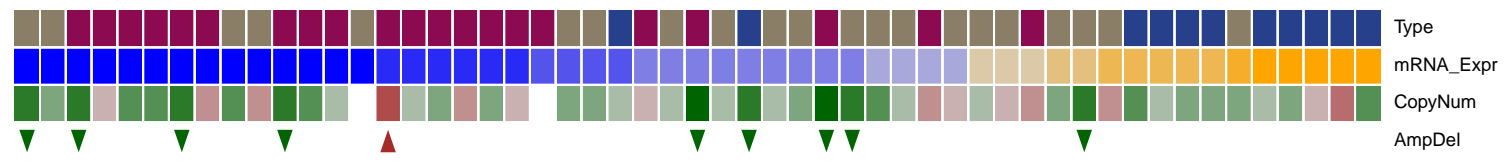

S2153  
 S2380  
 S2379  
 S2374  
 S2391  
 S2761  
 S2189  
 S2510  
 S2410  
 S2549  
 S2320  
 S2357  
 S2279  
 S2350  
 S2408  
 S2765  
 S2216  
 S2521  
 S2668  
 S2718  
 S2667  
 S2800  
 S2247  
 S2338  
 S2406  
 S2596  
 S2373  
 S2650  
 S2470  
 S2495  
 S2645  
 S2400  
 S2423  
 S2333  
 S2767  
 S2330  
 S2654  
 S2381  
 S2392  
 S2508  
 S2365  
 S2812  
 S2097  
 S2770A  
 S2356  
 S2686  
 S2583  
 S2734  
 S2261  
 S2125  
 S2731  
 S2405  
 S2688



# COL6A1

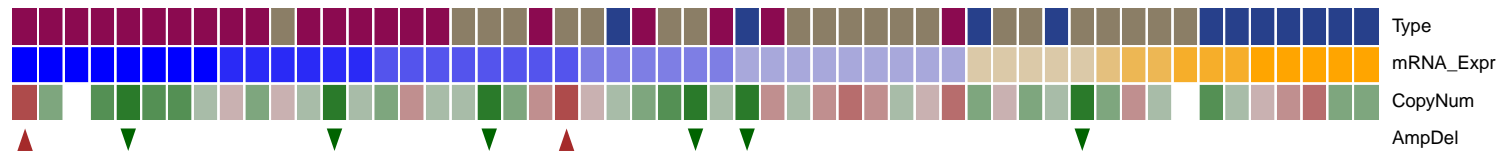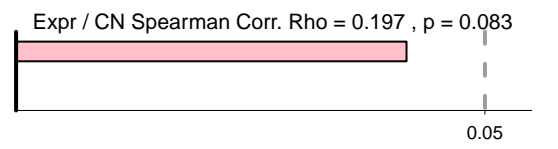

21 : 47401109  
 21 : 47402144  
 21 : 47404109  
 21 : 47404165  
 21 : 47404216  
 21 : 47404268  
 21 : 47405667  
 21 : 47405786  
 21 : 47406806  
 21 : 47407676  
 21 : 47408455  
 21 : 47409570  
 21 : 47418282  
 21 : 47419697  
 21 : 47420301  
 21 : 47421177  
 21 : 47421270  
 21 : 47421319  
 21 : 47421947  
 21 : 47422537  
 21 : 47423074  
 21 : 47423639  
 21 : 47424543

GeneLoc  
 PromoterAssoc  
 CpGIsland

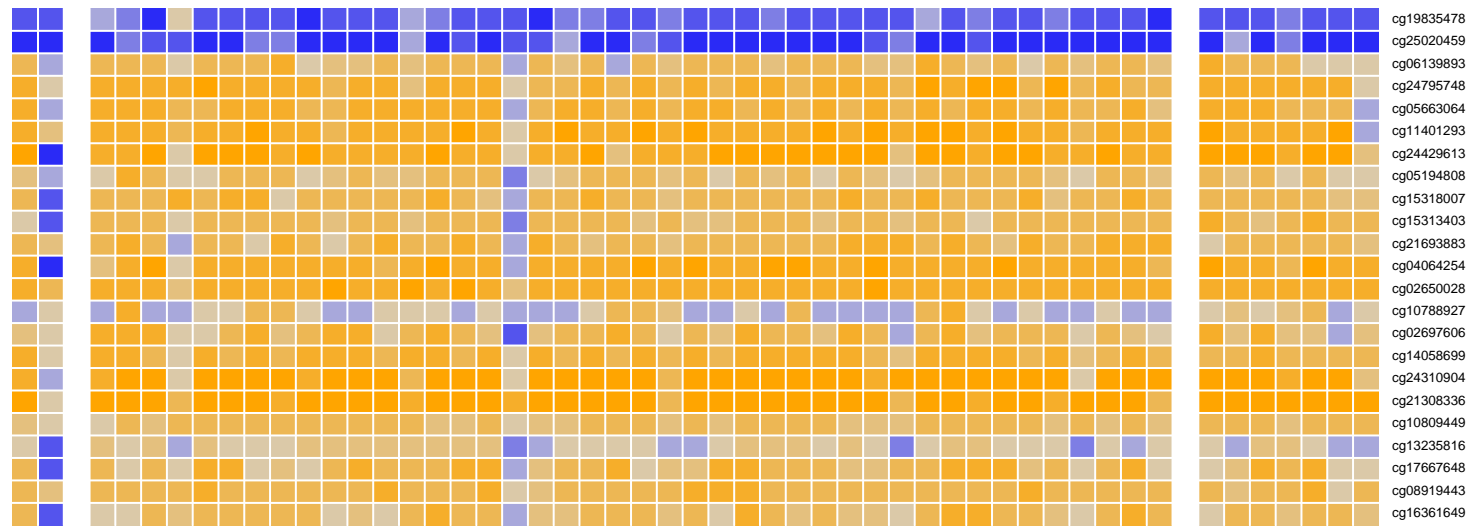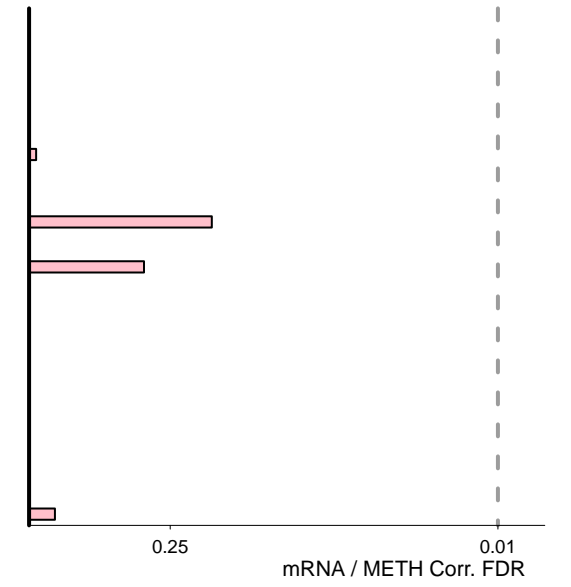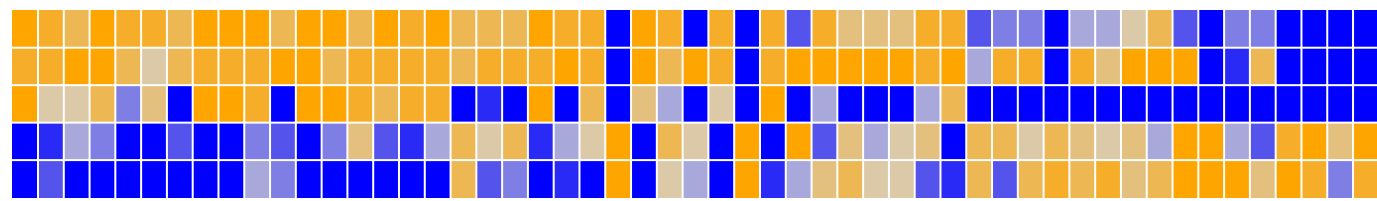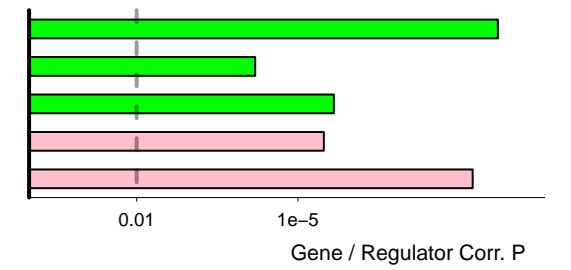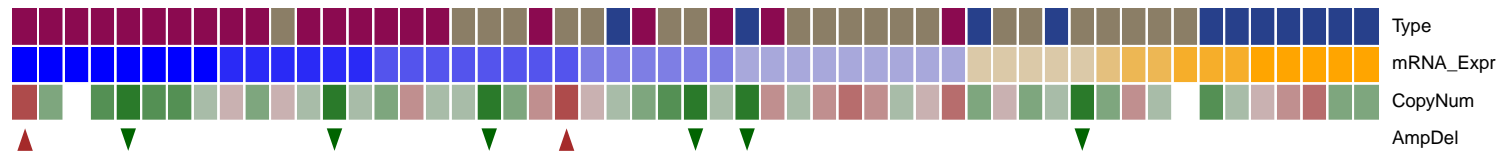

S2374  
 S2668  
 S2667  
 S2718  
 S2373  
 S2357  
 S2761  
 S2408  
 S2391  
 S2320  
 S2392  
 S2400  
 S2765  
 S2379  
 S2406  
 S2510  
 S2216  
 S2423  
 S2333  
 S2380  
 S2521  
 S2734  
 S2596  
 S2356  
 S2279  
 S2381  
 S2549  
 S2189  
 S2125  
 S2330  
 S2495  
 S2097  
 S2153  
 S2812  
 S2767  
 S2247  
 S2508  
 S2583  
 S2645  
 S2654  
 S2338  
 S2650  
 S2800  
 S2365  
 S2410  
 S2350  
 S2770A  
 S2731  
 S2405  
 S2688  
 S2470  
 S2686  
 S2261

Type  
 mRNA\_Expr  
 CopyNum  
 AmpDel

# ZEB1

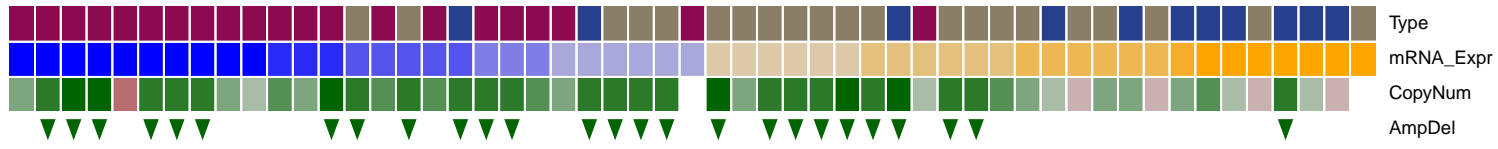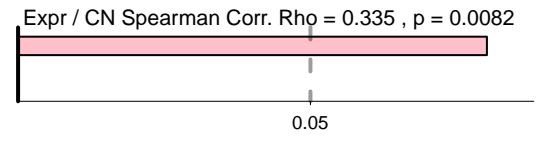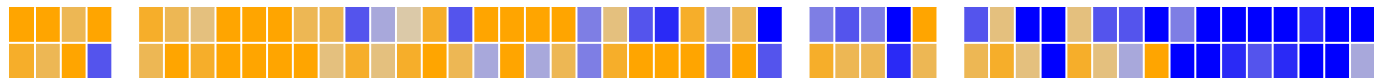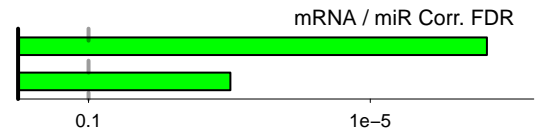

10 : 31607150  
10 : 31607153  
10 : 31607160  
10 : 31607228  
10 : 31607300  
10 : 31607306  
10 : 31607330  
10 : 31607441  
10 : 31607685  
10 : 31607699  
10 : 31607717  
10 : 31607925  
10 : 31607973  
10 : 31608188  
10 : 31608207  
10 : 31608209  
10 : 31608212  
10 : 31608402  
10 : 31608548  
10 : 31609200  
10 : 31609347  
10 : 31609882  
10 : 31609891  
10 : 31609896  
10 : 31609905  
10 : 31609919  
10 : 31609960  
10 : 31610091  
10 : 31610093  
10 : 31610399  
10 : 31610754  
10 : 31611868  
10 : 31612795  
10 : 31650958  
10 : 31651341  
10 : 31702967  
10 : 31709144  
10 : 31715394  
10 : 31747241  
10 : 31772744  
10 : 31797750  
10 : 31816809

GeneLoc  
PromoterAssoc  
CpGIsland

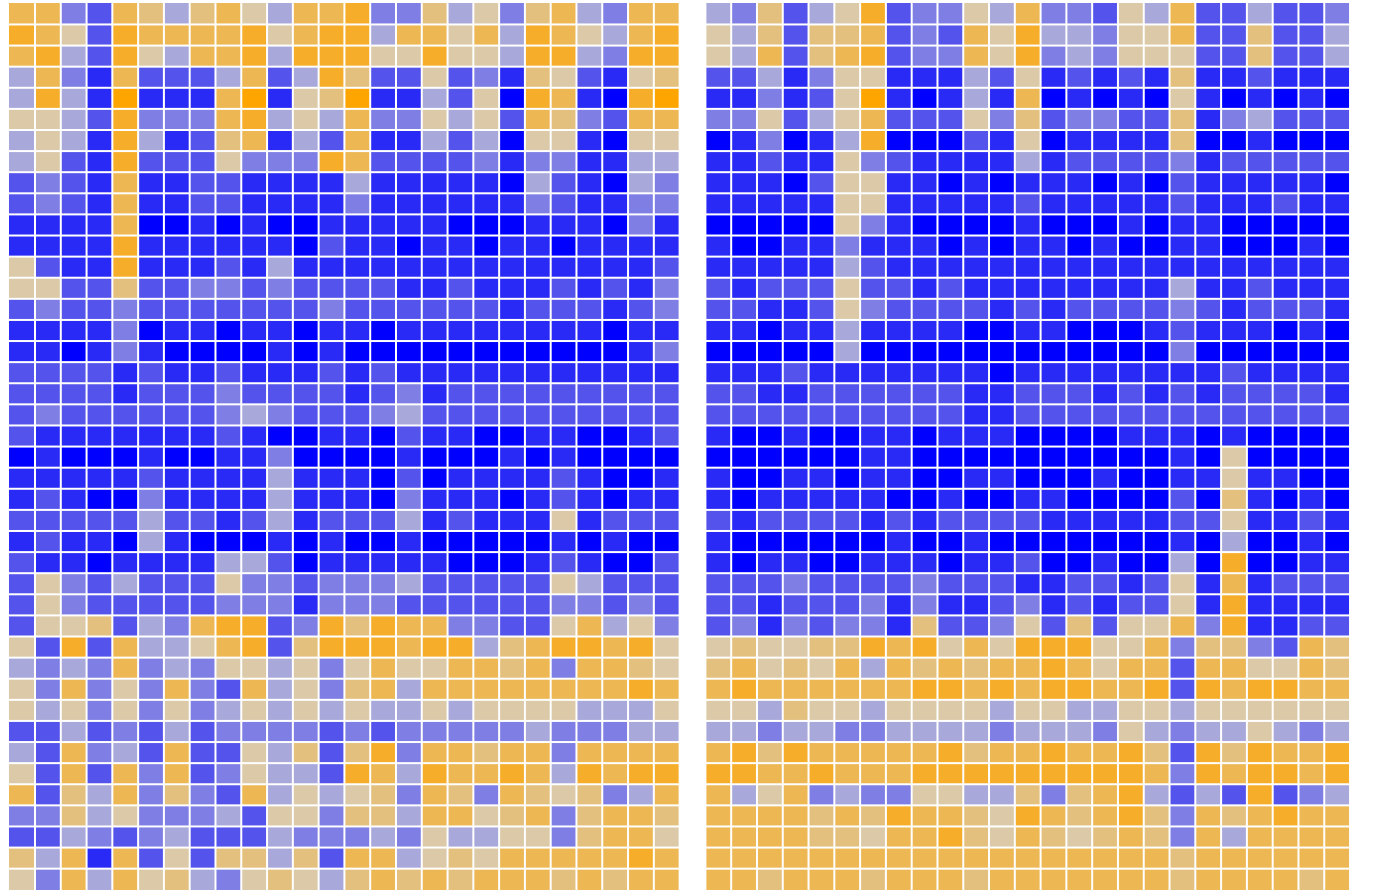

cg03719128  
cg24861272  
cg00520933  
cg20499861  
cg00440043  
cg04623172  
cg14784699  
cg11799172  
cg02156314  
cg00351930  
cg24149151  
cg14631462  
cg03976379  
cg06637963  
cg09010998  
cg01387945  
cg23232615  
cg00139244  
cg01267522  
cg18154422  
cg20196129  
cg12758636  
cg04430381  
cg18465286  
cg23712359  
cg04667277  
cg18798264  
cg07095783  
cg14582298  
cg06422108  
cg13303654  
cg07137701  
cg04116155  
cg14332824  
cg17270370  
cg12336709  
cg26365110  
cg19038462  
cg18516609  
cg14794866  
cg16912088  
cg26229092

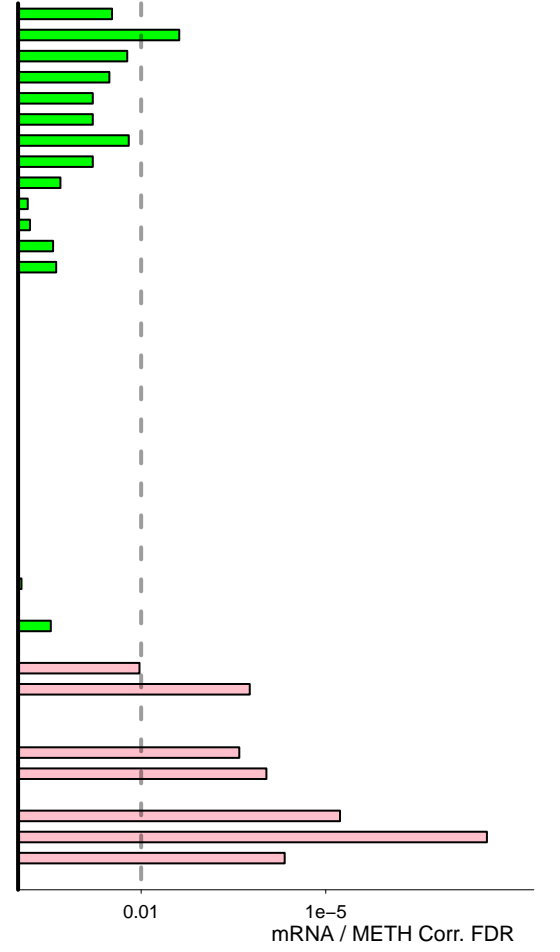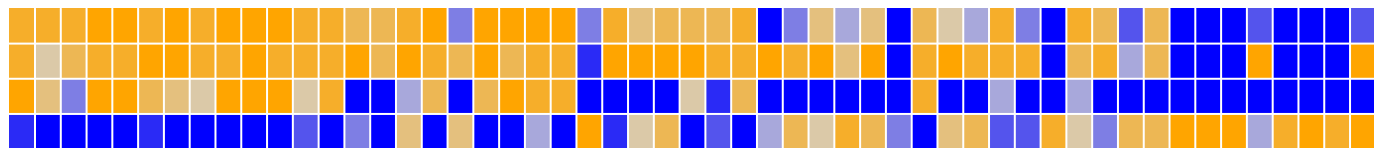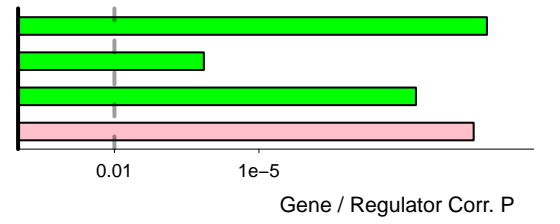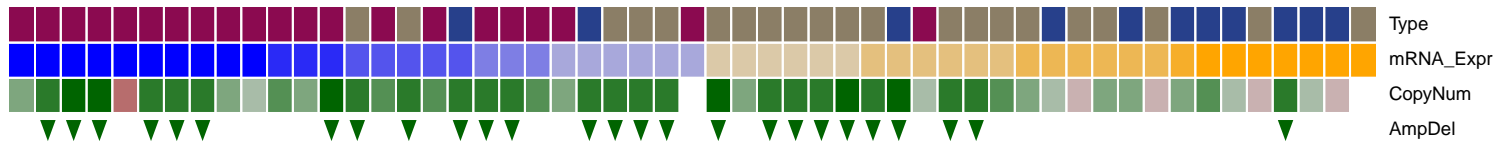

S2330  
S2357  
S2373  
S2374  
S2391  
S2508  
S2279  
S2189  
S2408  
S2400  
S2521  
S2668  
S2510  
S2392  
S2761  
S2097  
S2406  
S2405  
S2718  
S2765  
S2320  
S2216  
S2731  
S2734  
S2812  
S2410  
S2667  
S2333  
S2596  
S2549  
S2654  
S2767  
S2800  
S2153  
S2686  
S2379  
S2365  
S2650  
S2247  
S2645  
S2338  
S2381  
S2380  
S2583  
S2423  
S2688  
S2770A  
S2125  
S2495  
S2470  
S2356  
S2261  
S2350

# CYR61

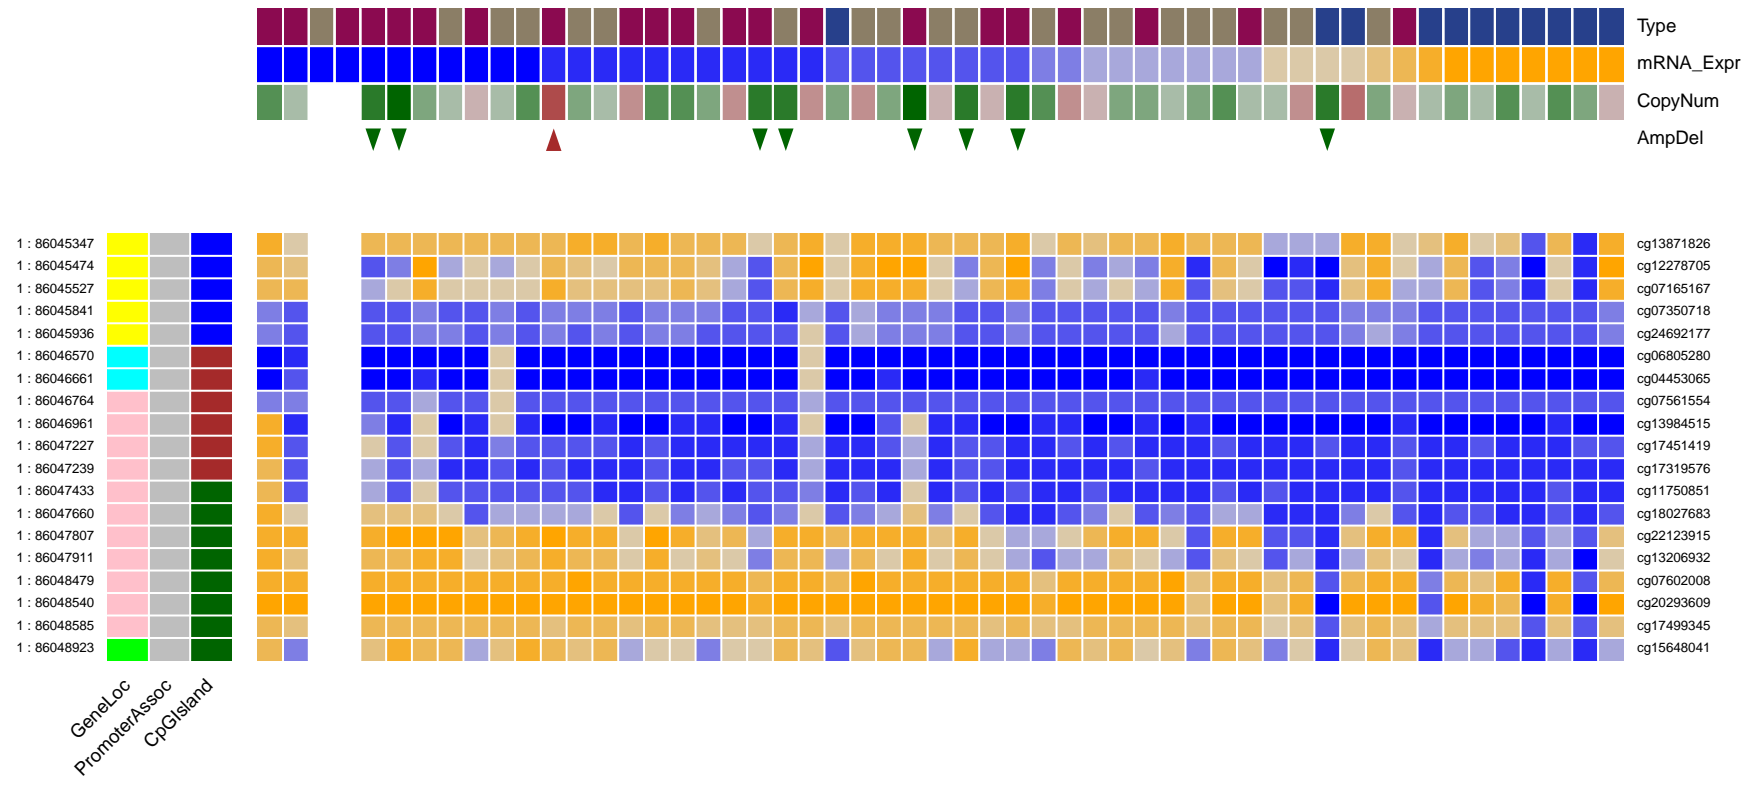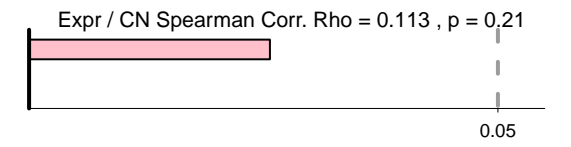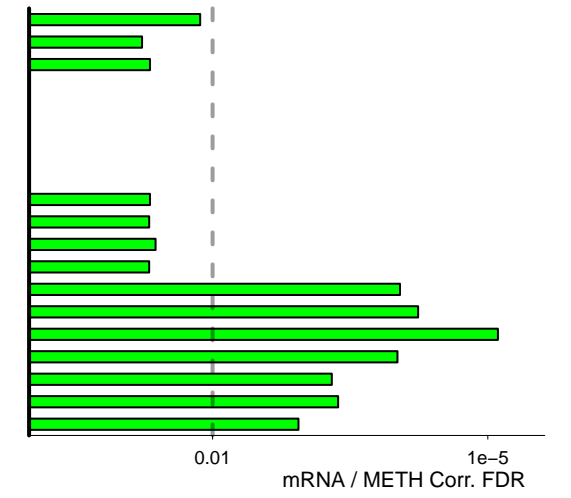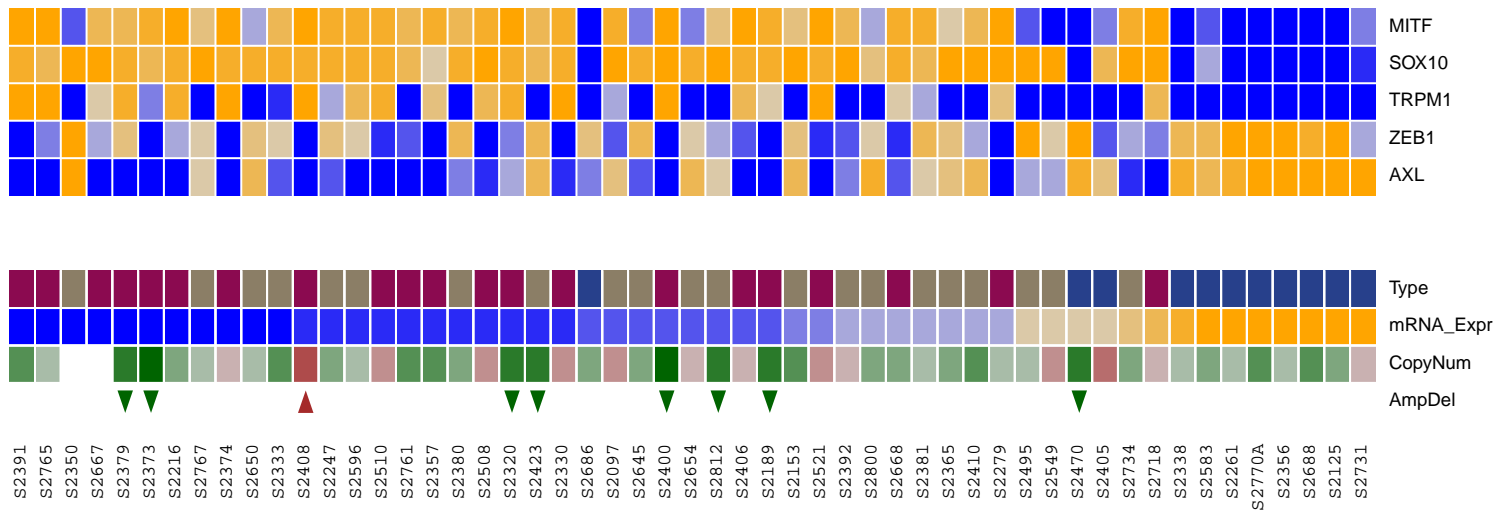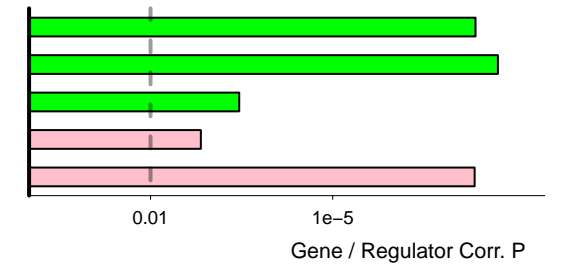

# LIFR

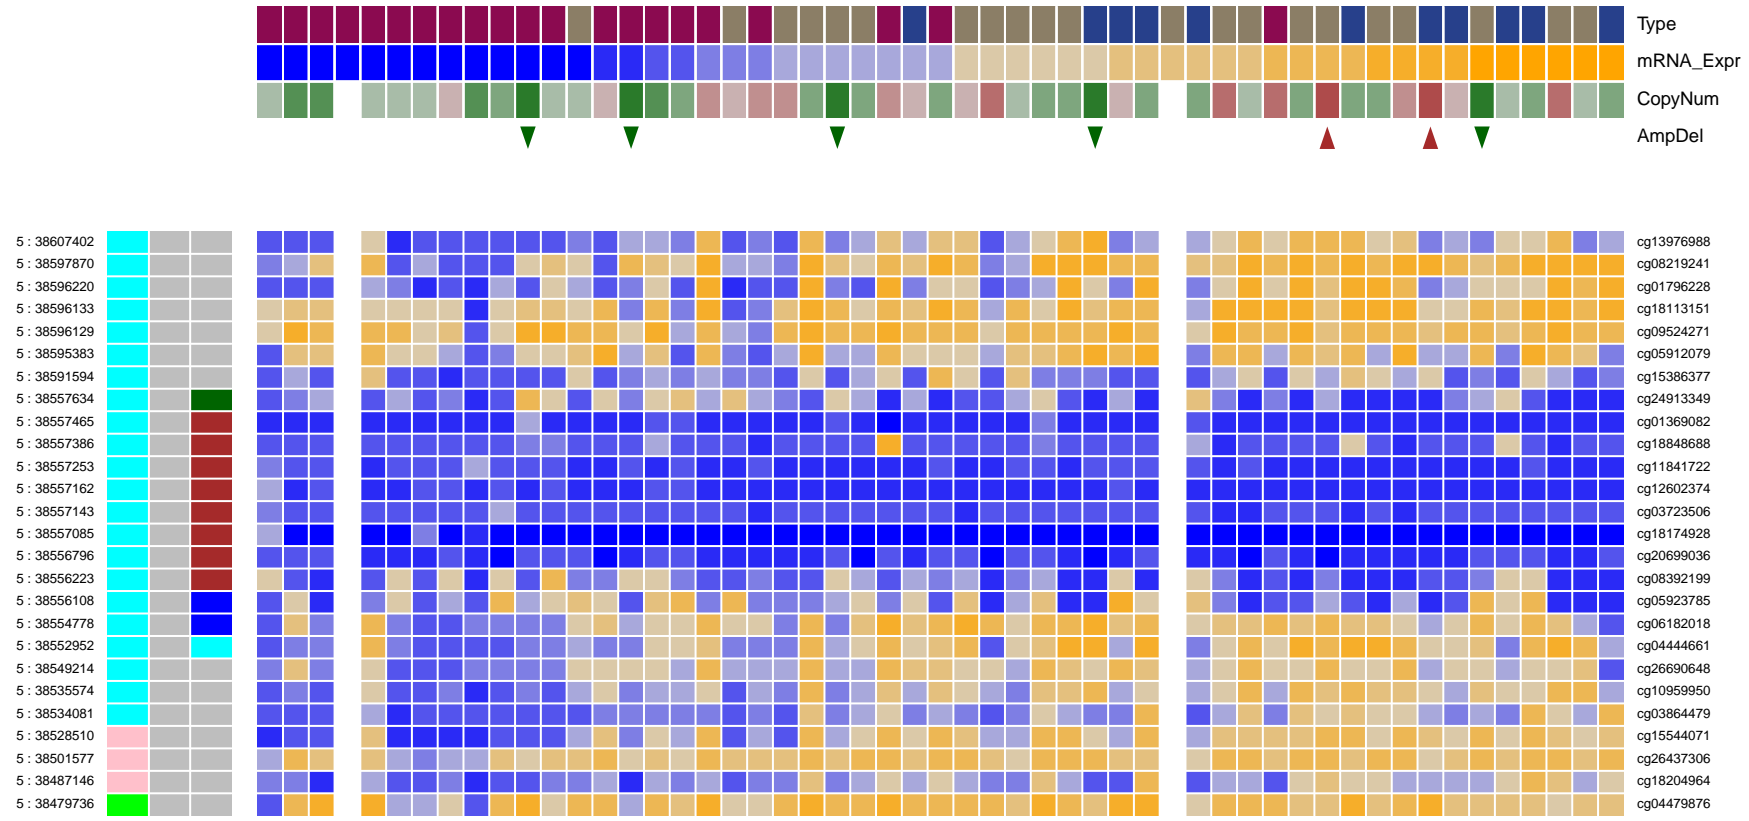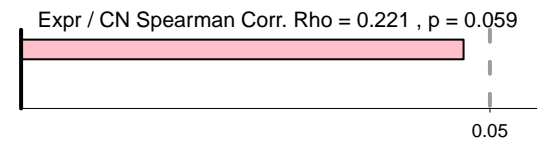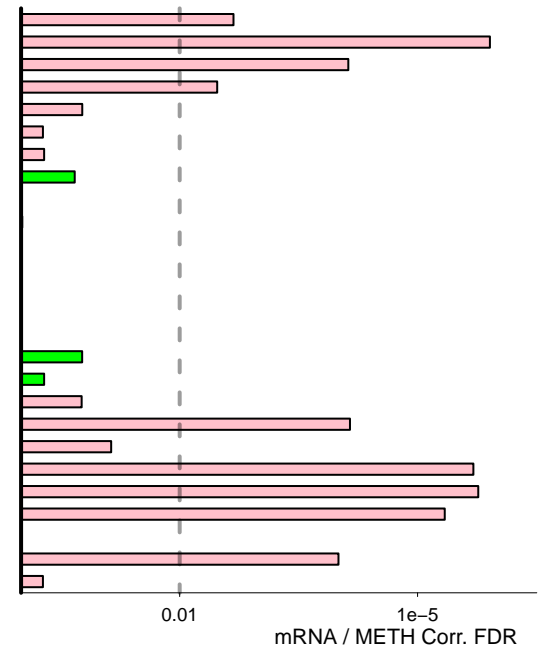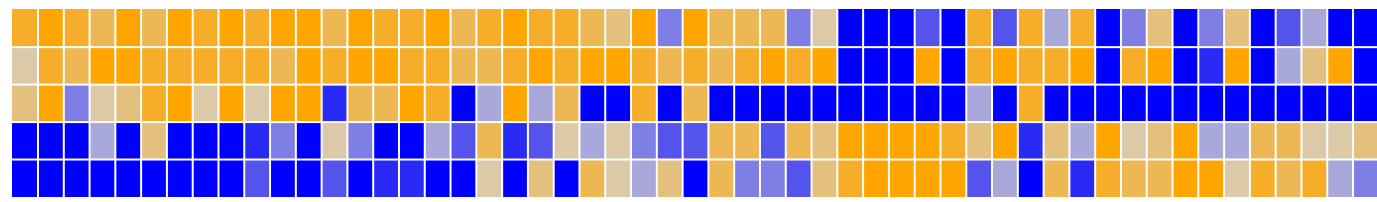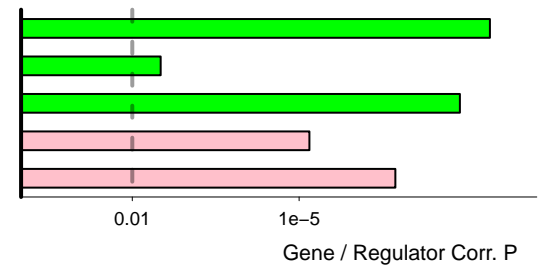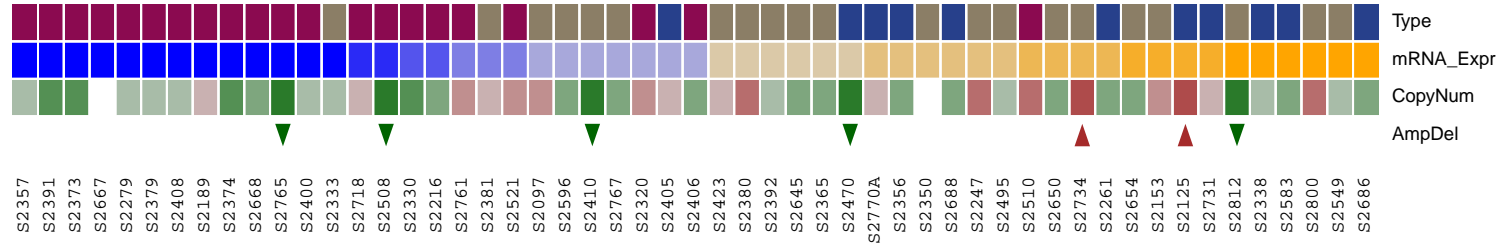

# KRT18

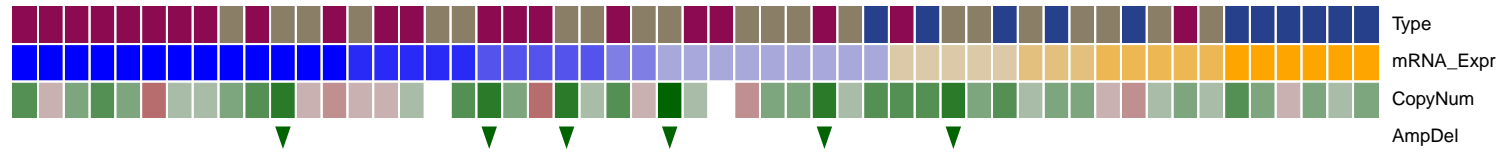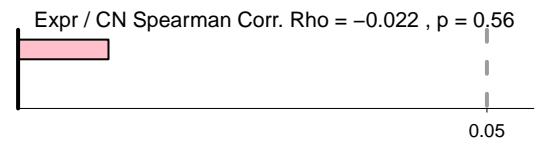

12 : 53341805  
 12 : 53342595  
 12 : 53342635  
 12 : 53342746  
 12 : 53342748  
 12 : 53342755  
 12 : 53342757  
 12 : 53342770  
 12 : 53342890  
 12 : 53343514  
 12 : 53343703  
 12 : 53343849  
 12 : 53344573  
 12 : 53344746

GeneLoc  
 PromoterAssoc  
 CpGIsland

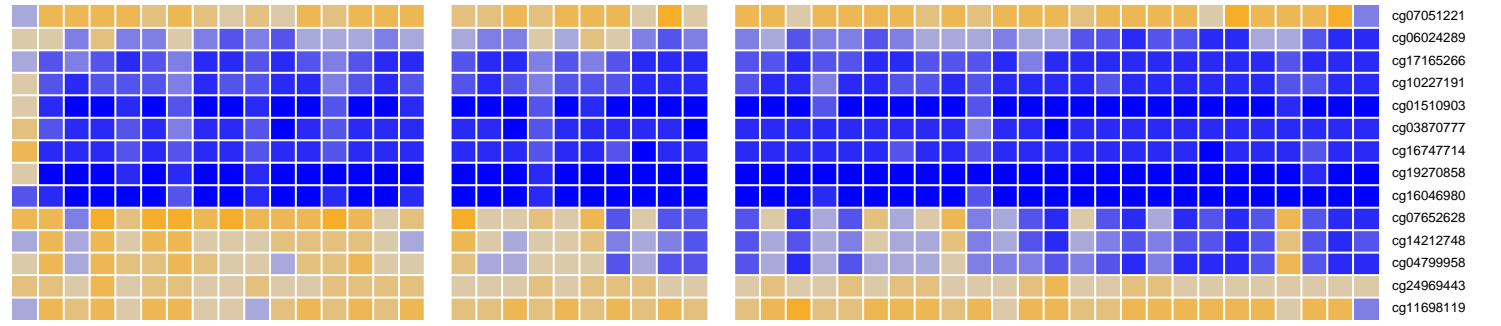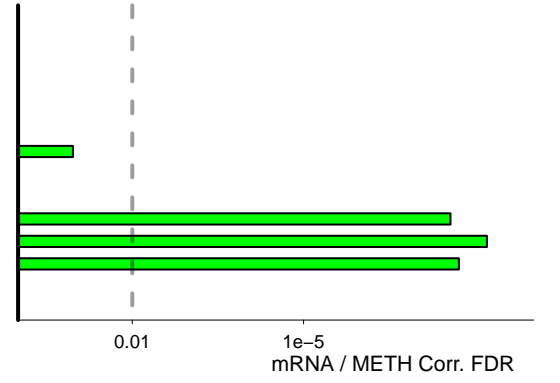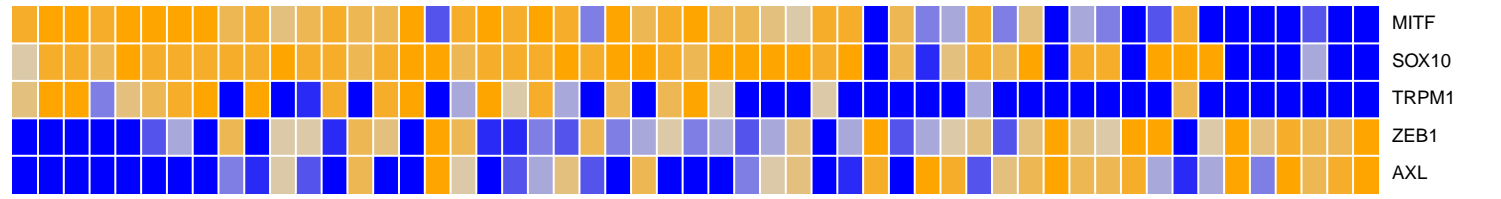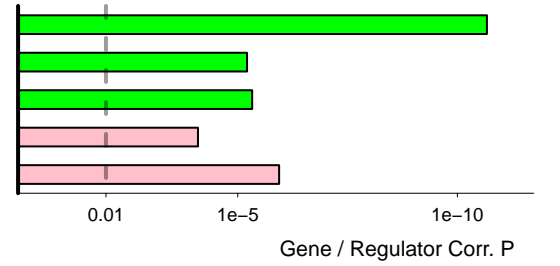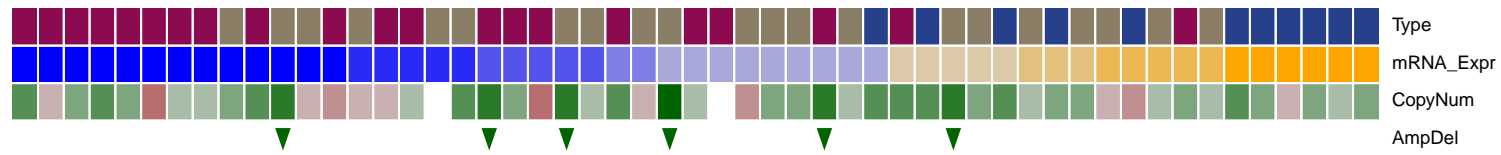

S2357  
 S2391  
 S2374  
 S2373  
 S2279  
 S2406  
 S2216  
 S2408  
 S2380  
 S2330  
 S2767  
 S2333  
 S2510  
 S2423  
 S2379  
 S2400  
 S2350  
 S2381  
 S2521  
 S2668  
 S2320  
 S2097  
 S2645  
 S2718  
 S2410  
 S2596  
 S2765  
 S2667  
 S2392  
 S2812  
 S2365  
 S2189  
 S2734  
 S2261  
 S2761  
 S2731  
 S2800  
 S2247  
 S2405  
 S2153  
 S2356  
 S2650  
 S2654  
 S2470  
 S2495  
 S2508  
 S2549  
 S2770A  
 S2686  
 S2688  
 S2583  
 S2338  
 S2125

Type  
 mRNA\_Expr  
 CopyNum  
 AmpDel

# CCBE1

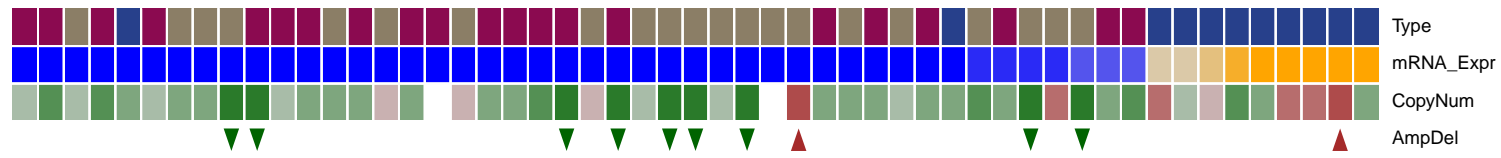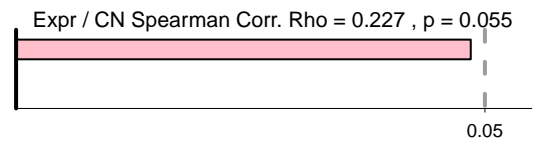

18 : 57365520  
 18 : 57365116  
 18 : 57364872  
 18 : 57364868  
 18 : 57364862  
 18 : 57364587  
 18 : 57364491  
 18 : 57364136  
 18 : 57363916  
 18 : 57363715  
 18 : 57363691  
 18 : 57363081  
 18 : 57360307  
 18 : 57108056  
 18 : 57101564

GeneLoc  
 PromoterAssoc  
 CpGIsland

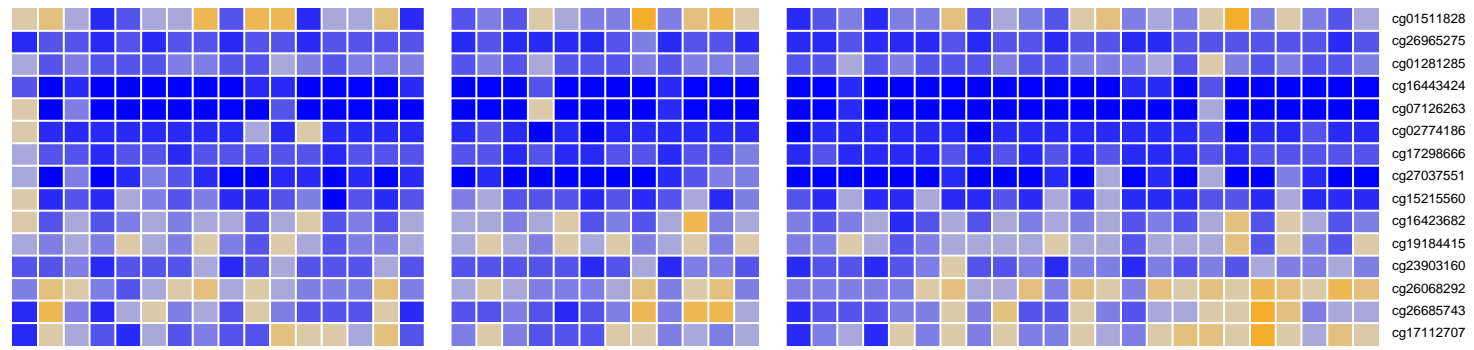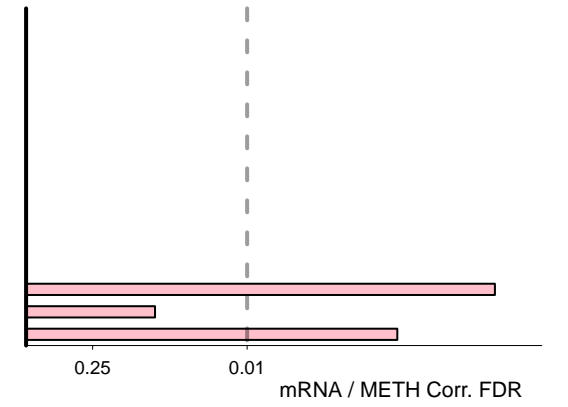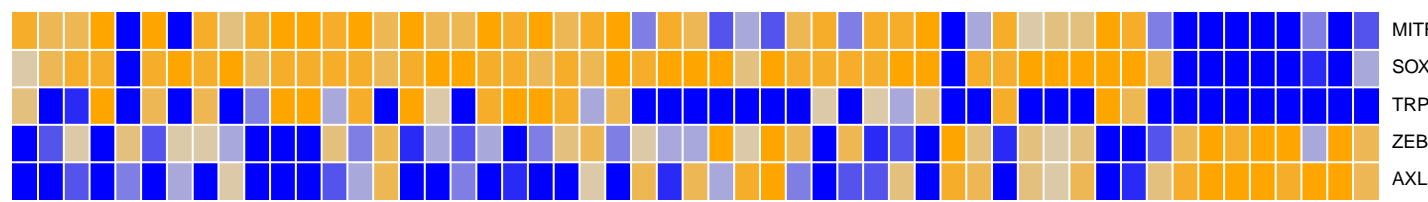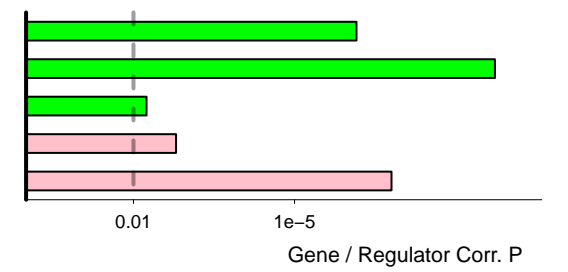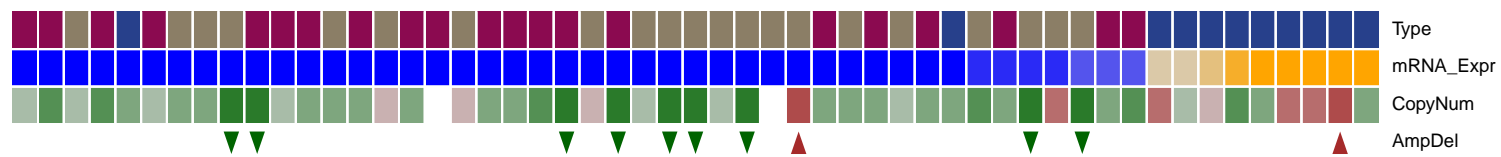

S2357  
 S2761  
 S2333  
 S2374  
 S2686  
 S2406  
 S2549  
 S2596  
 S2812  
 S2373  
 S2391  
 S2408  
 S2247  
 S2320  
 S2423  
 S2521  
 S2667  
 S2392  
 S2216  
 S2330  
 S2765  
 S2379  
 S2381  
 S2718  
 S2654  
 S2734  
 S2410  
 S2495  
 S2800  
 S2350  
 S2380  
 S2189  
 S2645  
 S2668  
 S2097  
 S2279  
 S2470  
 S2650  
 S2510  
 S2365  
 S2767  
 S2153  
 S2400  
 S2508  
 S2405  
 S2338  
 S2770A  
 S2688  
 S2356  
 S2261  
 S2731  
 S2125  
 S2583

# RND3

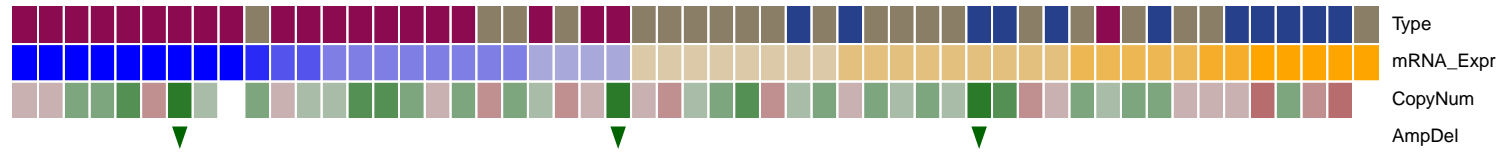

2: 151395457  
2: 151389355  
2: 151386104  
2: 151377525  
2: 151352580  
2: 151345544  
2: 151345498  
2: 151343818  
2: 151343769  
2: 151343582  
2: 151343046  
2: 151342350  
2: 151342091  
2: 151341779  
2: 151341348  
2: 151340750  
2: 151334267  
2: 151331573  
2: 151329752

GeneLoc  
PromoterAssoc  
CpGIsland

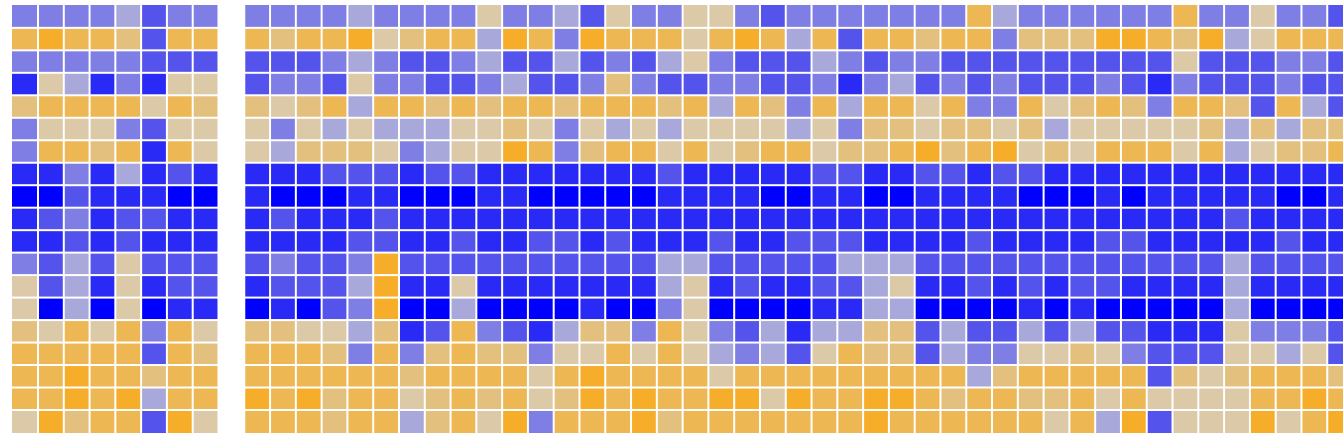

cg19035395  
cg07609844  
cg26572896  
cg16882472  
cg04982052  
cg20199347  
cg26337868  
cg09062595  
cg20388294  
cg02808595  
cg02444987  
cg14184873  
cg02285812  
cg07749087  
cg23641707  
cg26784822  
cg17730764  
cg17862135  
cg12632313

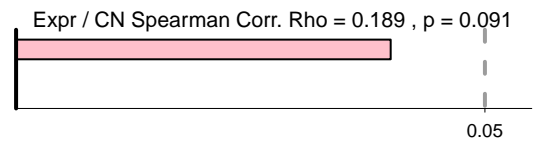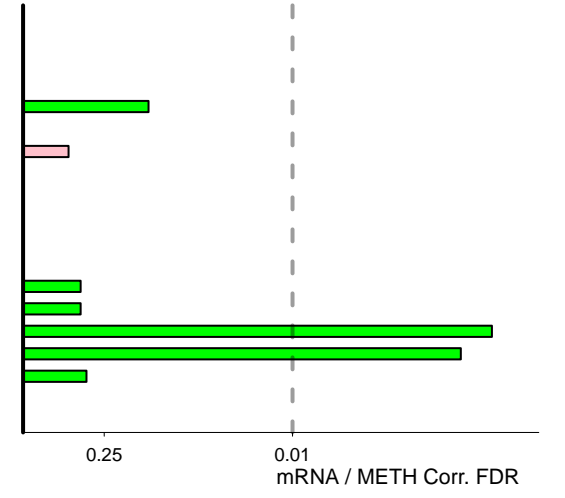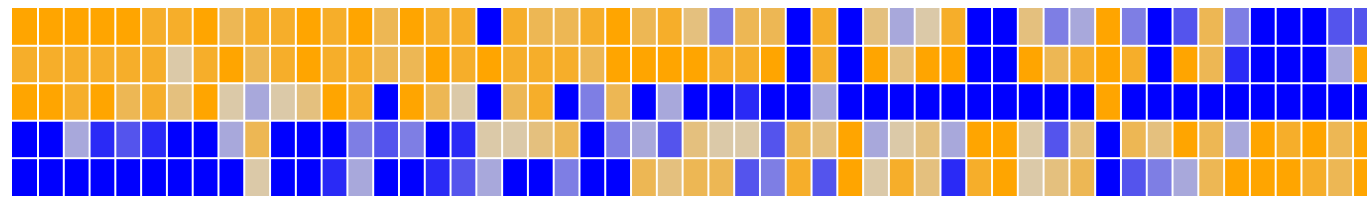

MITF  
SOX10  
TRPM1  
ZEB1  
AXL

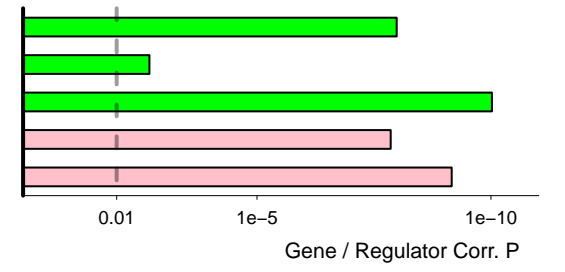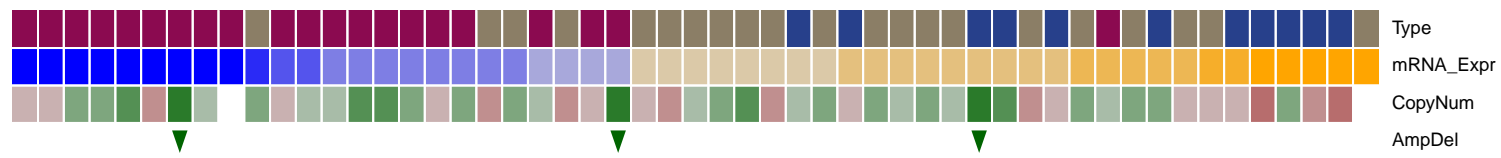

S2374  
S2391  
S2216  
S2521  
S2406  
S2510  
S2357  
S2408  
S2667  
S2381  
S2189  
S2279  
S2330  
S2320  
S2761  
S2765  
S2508  
S2668  
S2549  
S2596  
S2379  
S2380  
S2373  
S2718  
S2410  
S2097  
S2153  
S2654  
S2333  
S2392  
S2338  
S2247  
S2770A  
S2812  
S2800  
S2365  
S2734  
S2470  
S2125  
S2767  
S2405  
S2650  
S2400  
S2645  
S2686  
S2495  
S2423  
S2731  
S2356  
S2688  
S2261  
S2583  
S2350

Type  
mRNA\_Expr  
CopyNum  
AmpDel

# CCL2

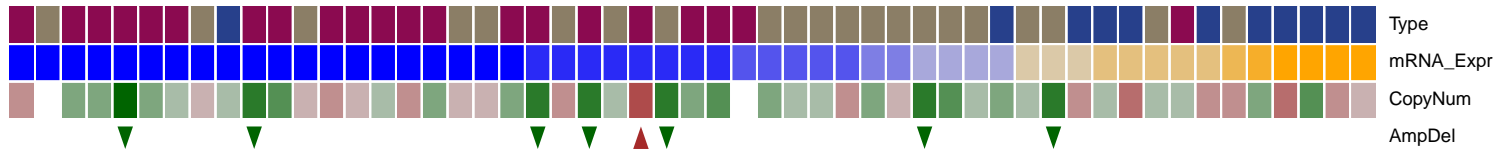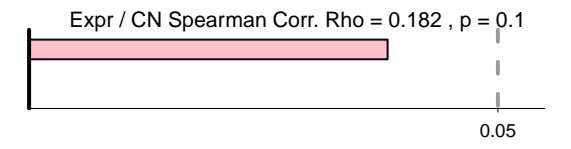

17:32580869  
17:32581035  
17:32581220  
17:32581466  
17:32582128  
17:32582246  
17:32582265  
17:32582359  
17:32582516  
17:32582828

GeneLoc  
PromoterAssoc  
CpGIsland

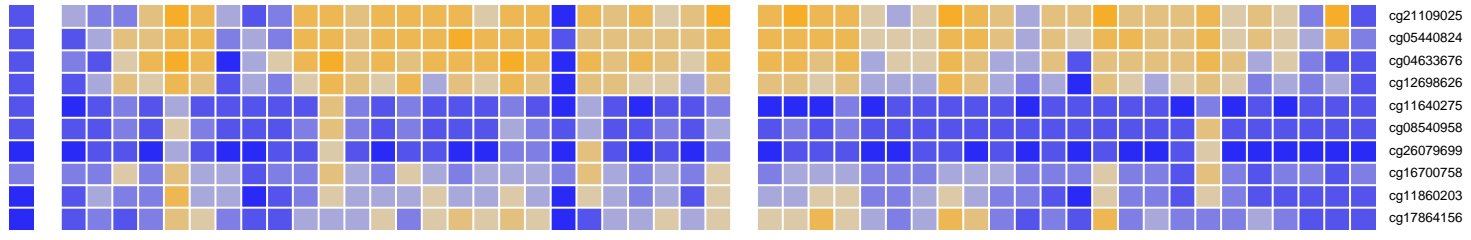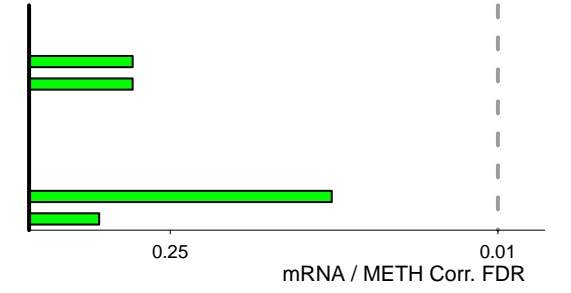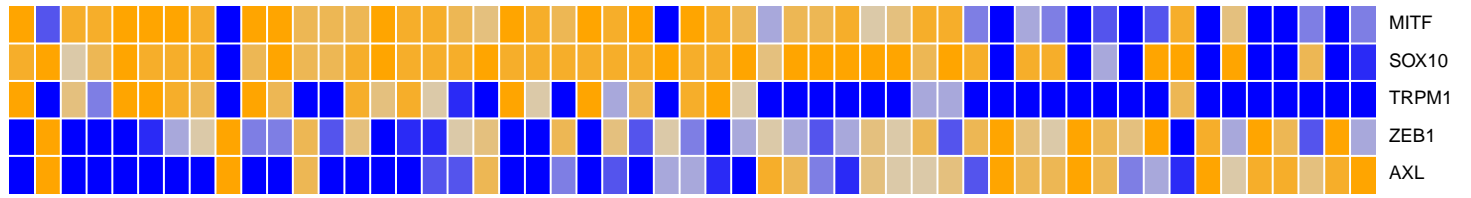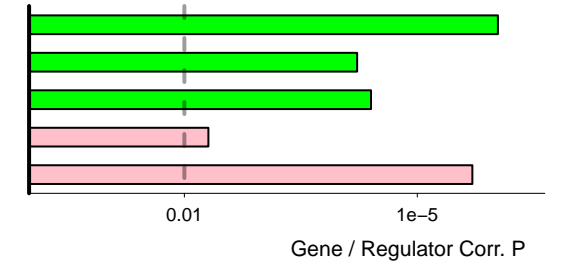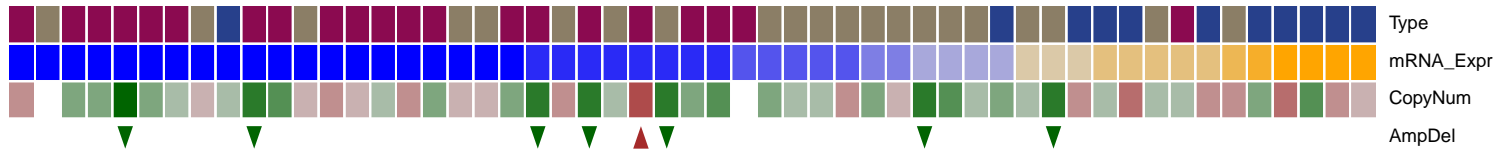

S2374  
S2350  
S2357  
S2373  
S2400  
S2521  
S2216  
S2596  
S2356  
S2765  
S2718  
S2423  
S2761  
S2379  
S2279  
S2510  
S2668  
S2333  
S2153  
S2391  
S2189  
S2380  
S2408  
S2247  
S2406  
S2549  
S2320  
S2330  
S2667  
S2800  
S2410  
S2392  
S2734  
S2365  
S2767  
S2381  
S2097  
S2645  
S2770A  
S2650  
S2654  
S2125  
S2583  
S2686  
S2495  
S2508  
S2688  
S2812  
S2261  
S2338  
S2405  
S2470  
S2731



# OSMR

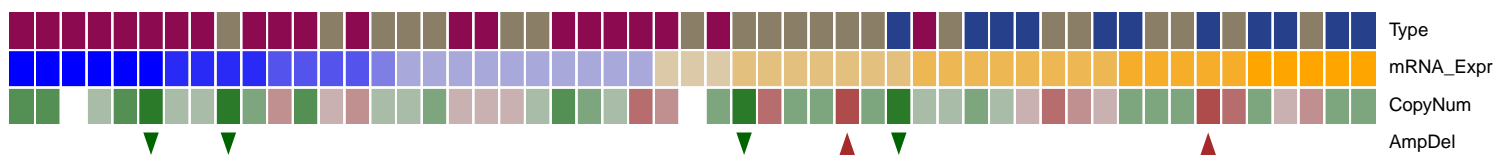

5 : 38845028  
 5 : 38845129  
 5 : 38845600  
 5 : 38845762  
 5 : 38846475  
 5 : 38846540  
 5 : 38846698  
 5 : 38846743  
 5 : 38846973  
 5 : 38855156  
 5 : 38866722  
 5 : 38870649  
 5 : 38872169  
 5 : 38879087  
 5 : 38886620  
 5 : 38924673  
 5 : 38930080

GeneLoc  
 PromoterAssoc  
 CpGIsland

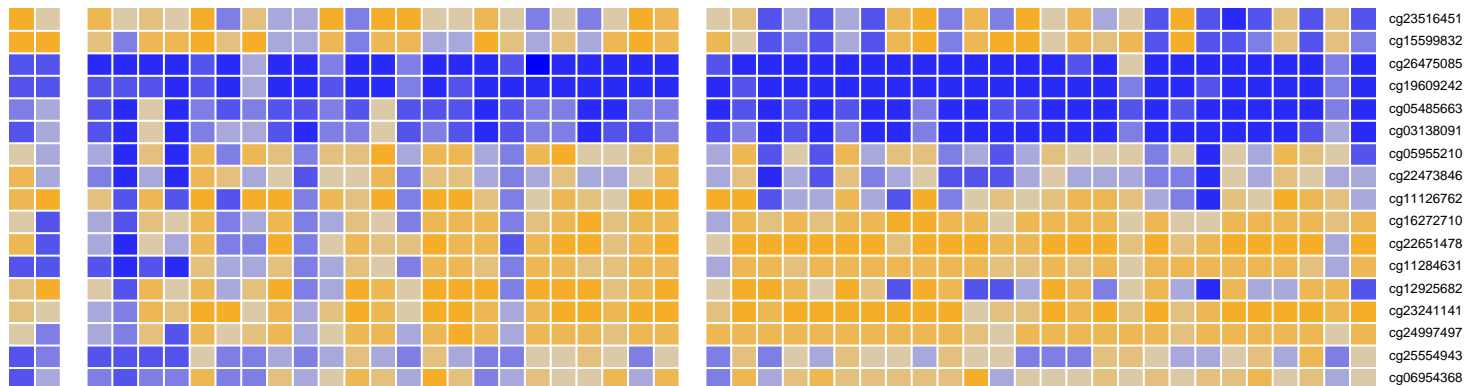

cg23516451  
 cg15599832  
 cg26475085  
 cg19609242  
 cg05485663  
 cg03138091  
 cg05955210  
 cg22473846  
 cg11126762  
 cg16272710  
 cg22651478  
 cg11284631  
 cg12925682  
 cg23241141  
 cg2497497  
 cg25554943  
 cg06954368

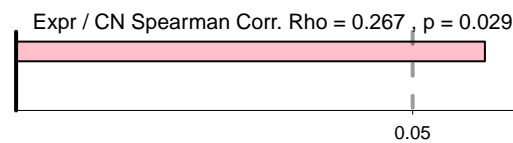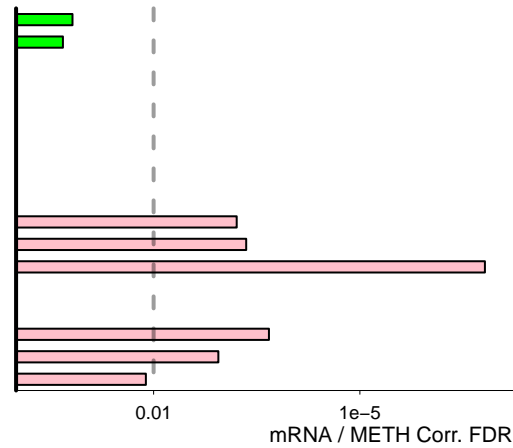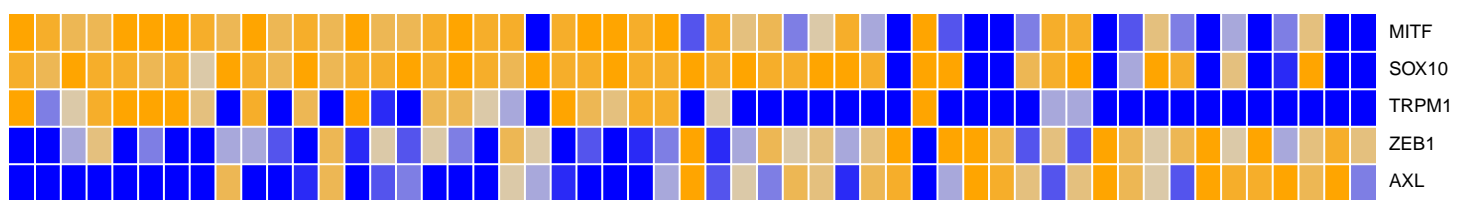

MITF  
 SOX10  
 TRPM1  
 ZEB1  
 AXL

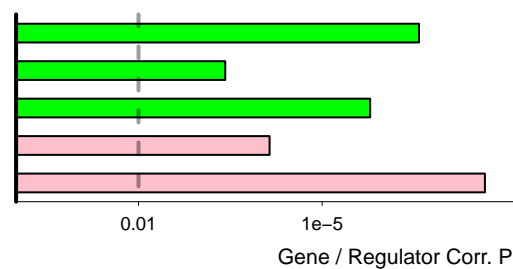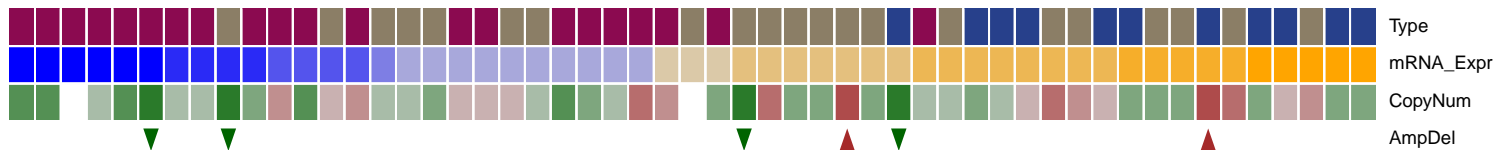

S2391  
 S2373  
 S2667  
 S2379  
 S2374  
 S2765  
 S2408  
 S2357  
 S2410  
 S2216  
 S2761  
 S2508  
 S2423  
 S2521  
 S2333  
 S2392  
 S2596  
 S2718  
 S2189  
 S2381  
 S2549  
 S2330  
 S2406  
 S2279  
 S2510  
 S2320  
 S2350  
 S2668  
 S2812  
 S2380  
 S2654  
 S2365  
 S2734  
 S2650  
 S2470  
 S2400  
 S2495  
 S2356  
 S2338  
 S2405  
 S2247  
 S2097  
 S2770A  
 S2583  
 S2767  
 S2645  
 S2125  
 S2800  
 S2261  
 S2731  
 S2153  
 S2688  
 S2686

Type  
 mRNA\_Expr  
 CopyNum  
 AmpDel

# EPHB2

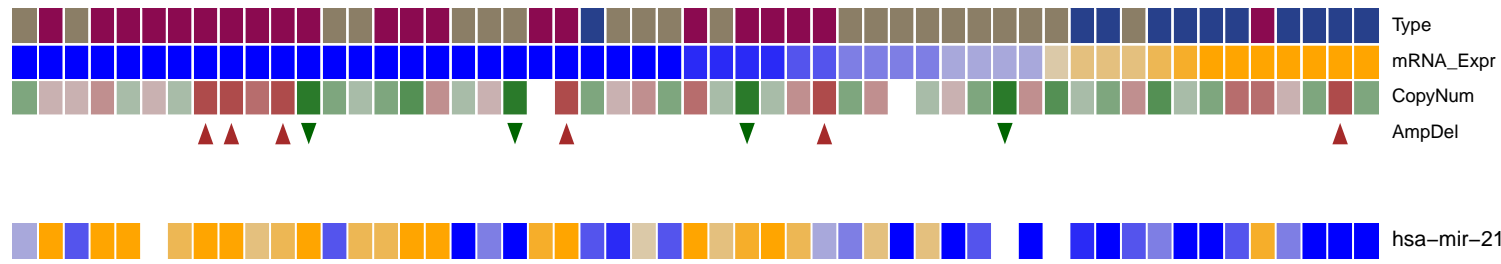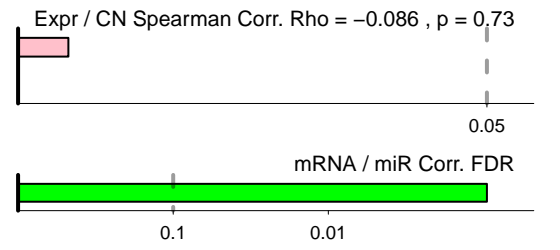

1:23036727  
1:23038177  
1:23038321  
1:23038361  
1:23038925  
1:23040723  
1:23044353  
1:23054915  
1:23061564  
1:23067453  
1:23076988  
1:23079320  
1:23080947  
1:23089658  
1:23097476  
1:23101846  
1:23105148  
1:23105600  
1:23108861  
1:23109881  
1:23111011  
1:23111123  
1:23111269  
1:23111484  
1:23111493  
1:23112654  
1:23115536  
1:23122112  
1:23135043  
1:23142734  
1:23153308  
1:23162550  
1:23175821  
1:23177414  
1:23181832  
1:23191470  
1:23191576  
1:23191664  
1:23197180  
1:23203462  
1:23206348

GeneLoc  
PromoterAssoc  
CpGIsland

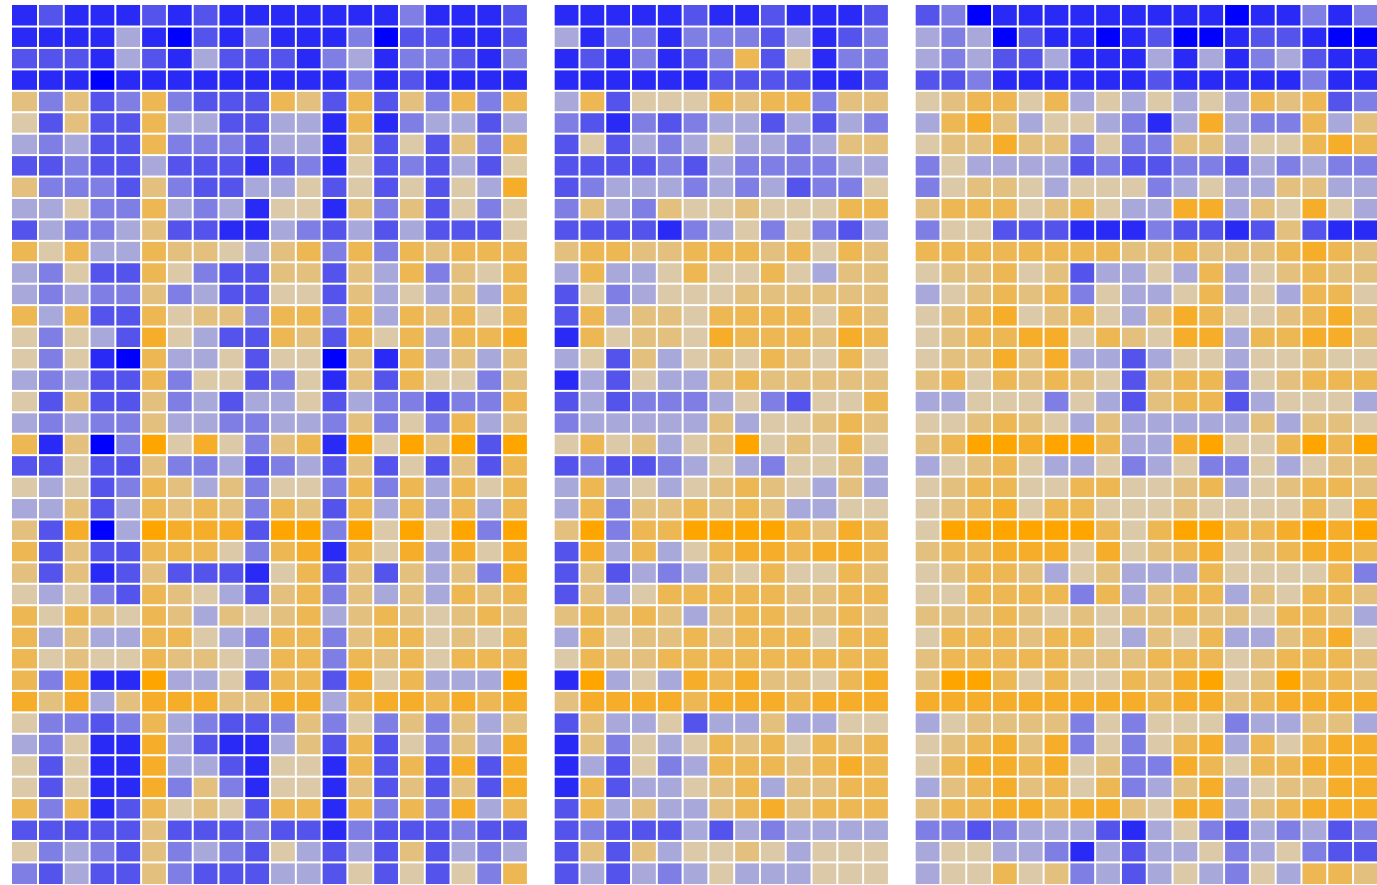

cg01970575  
cg27573841  
cg26255052  
cg22089024  
cg00831127  
cg07952381  
cg17276450  
cg00323313  
cg05266663  
cg11248999  
cg20297544  
cg00966078  
cg15639556  
cg05228361  
cg22702922  
cg23232832  
cg20149170  
cg02974898  
cg14787964  
cg04099056  
cg05340339  
cg05229416  
cg08539251  
cg09463984  
cg09136099  
cg04233054  
cg13988448  
cg12717584  
cg22931642  
cg13378083  
cg18156963  
cg15447913  
cg12412627  
cg20138922  
cg04914283  
cg24368899  
cg12046053  
cg08859698  
cg08264906  
cg26671246  
cg26554265

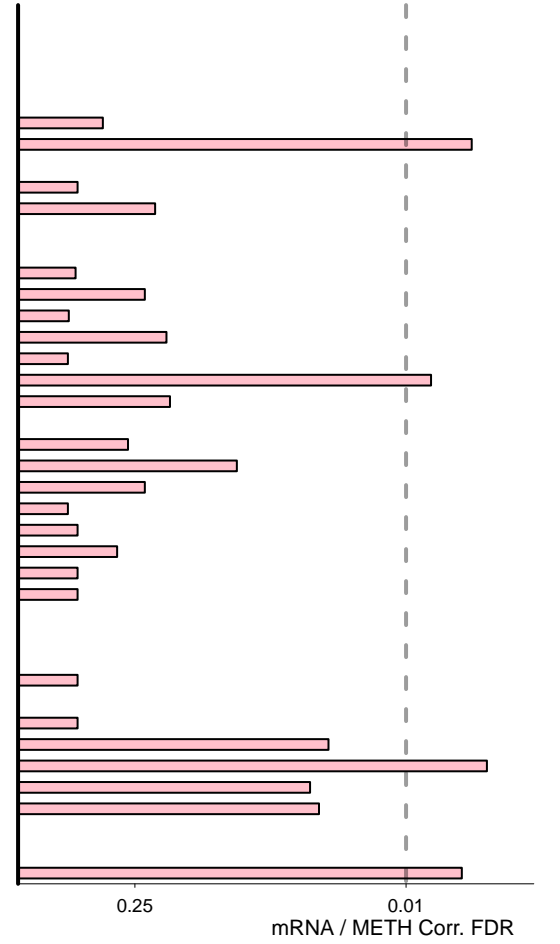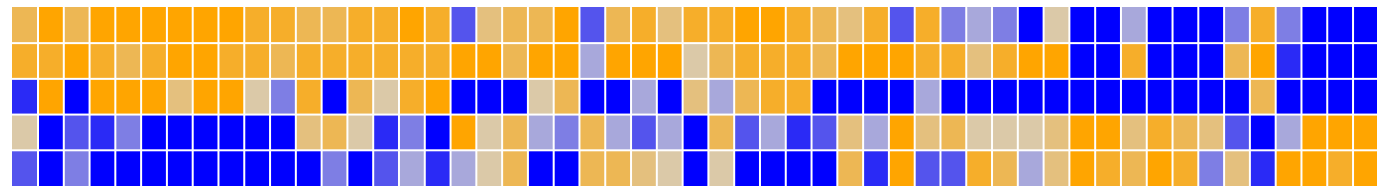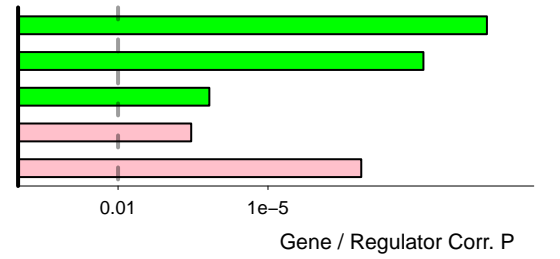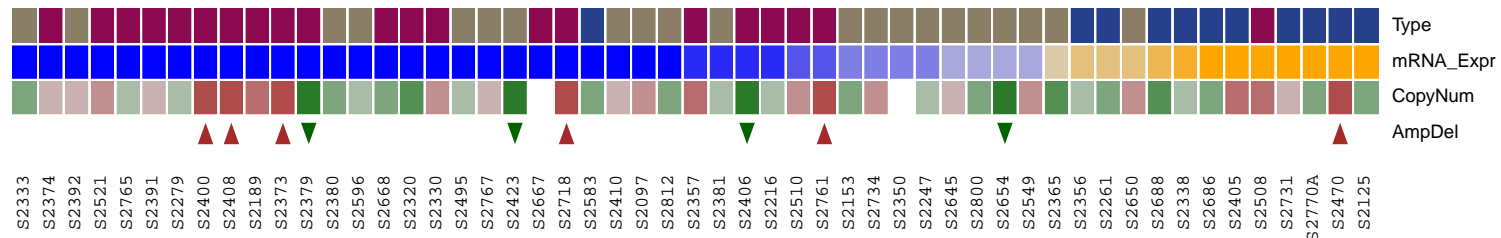

S2333  
S2374  
S2392  
S2521  
S2765  
S2391  
S2279  
S2400  
S2408  
S2189  
S2373  
S2379  
S2380  
S2596  
S2668  
S2320  
S2330  
S2495  
S2767  
S2423  
S2667  
S2718  
S2583  
S2410  
S2097  
S2812  
S2357  
S2381  
S2406  
S2216  
S2510  
S2761  
S2153  
S2734  
S2350  
S2247  
S2645  
S2800  
S2654  
S2549  
S2365  
S2356  
S2261  
S2650  
S2688  
S2338  
S2686  
S2405  
S2508  
S2731  
S2770A  
S2470  
S2125

# TFPI

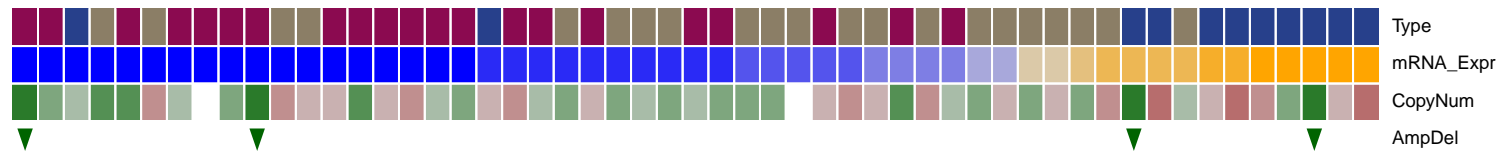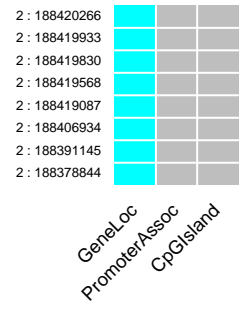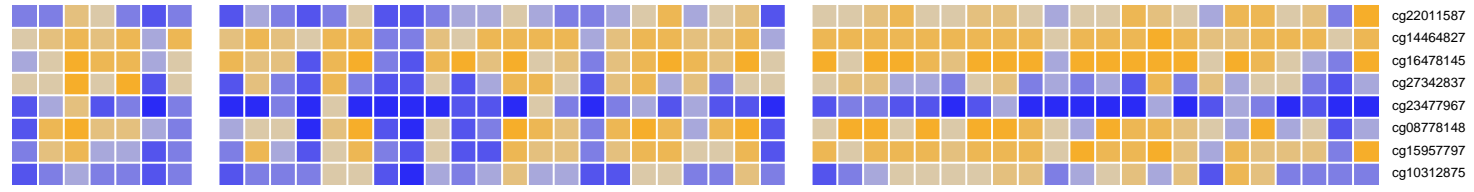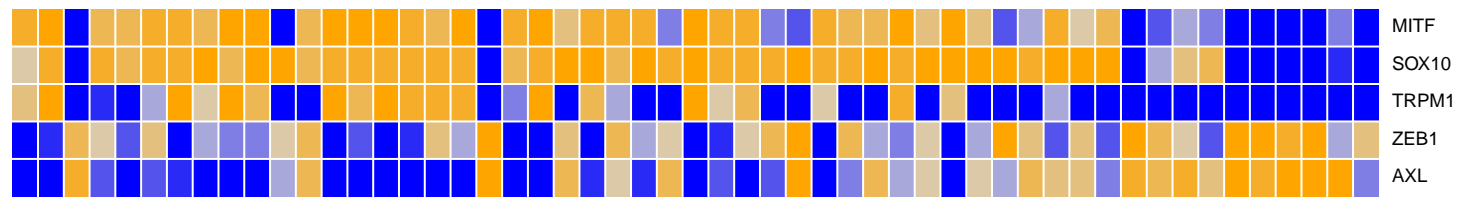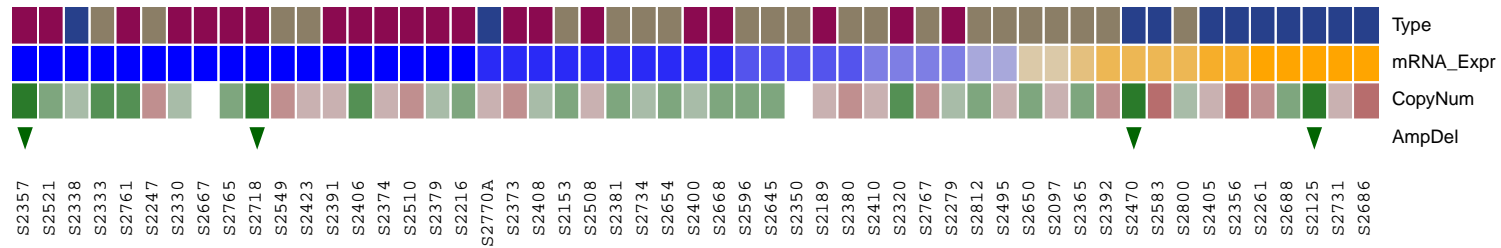

S2357  
S2521  
S2338  
S2333  
S2761  
S2247  
S2330  
S2667  
S2765  
S2718  
S2549  
S2423  
S2391  
S2406  
S2374  
S2510  
S2379  
S2216  
S2770A  
S2373  
S2408  
S2153  
S2508  
S2381  
S2734  
S2654  
S2400  
S2668  
S2596  
S2645  
S2350  
S2189  
S2380  
S2410  
S2320  
S2767  
S2279  
S2812  
S2495  
S2650  
S2097  
S2365  
S2392  
S2470  
S2583  
S2800  
S2405  
S2356  
S2261  
S2688  
S2125  
S2731  
S2686

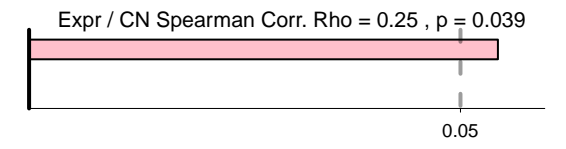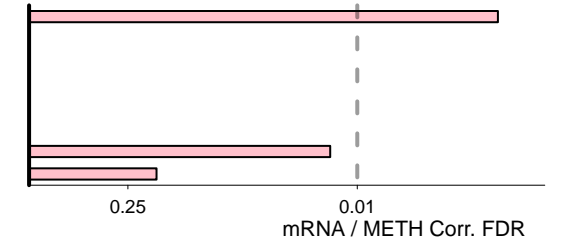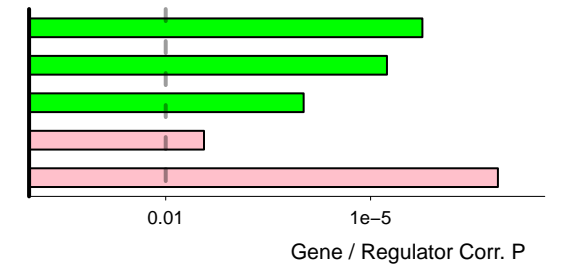

# NTM

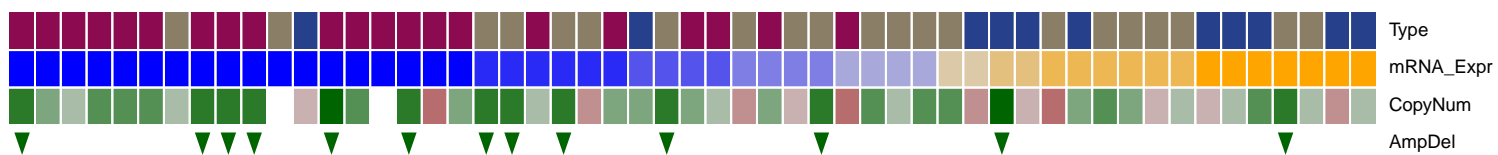

Expr / CN Spearman Corr. Rho = 0.355 , p = 0.0053

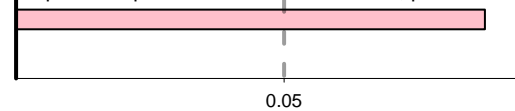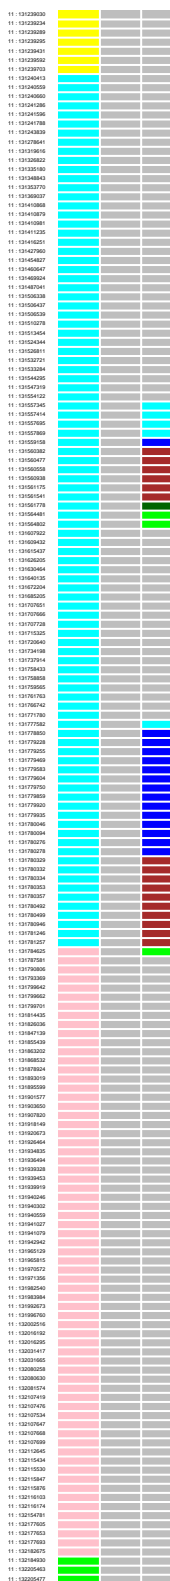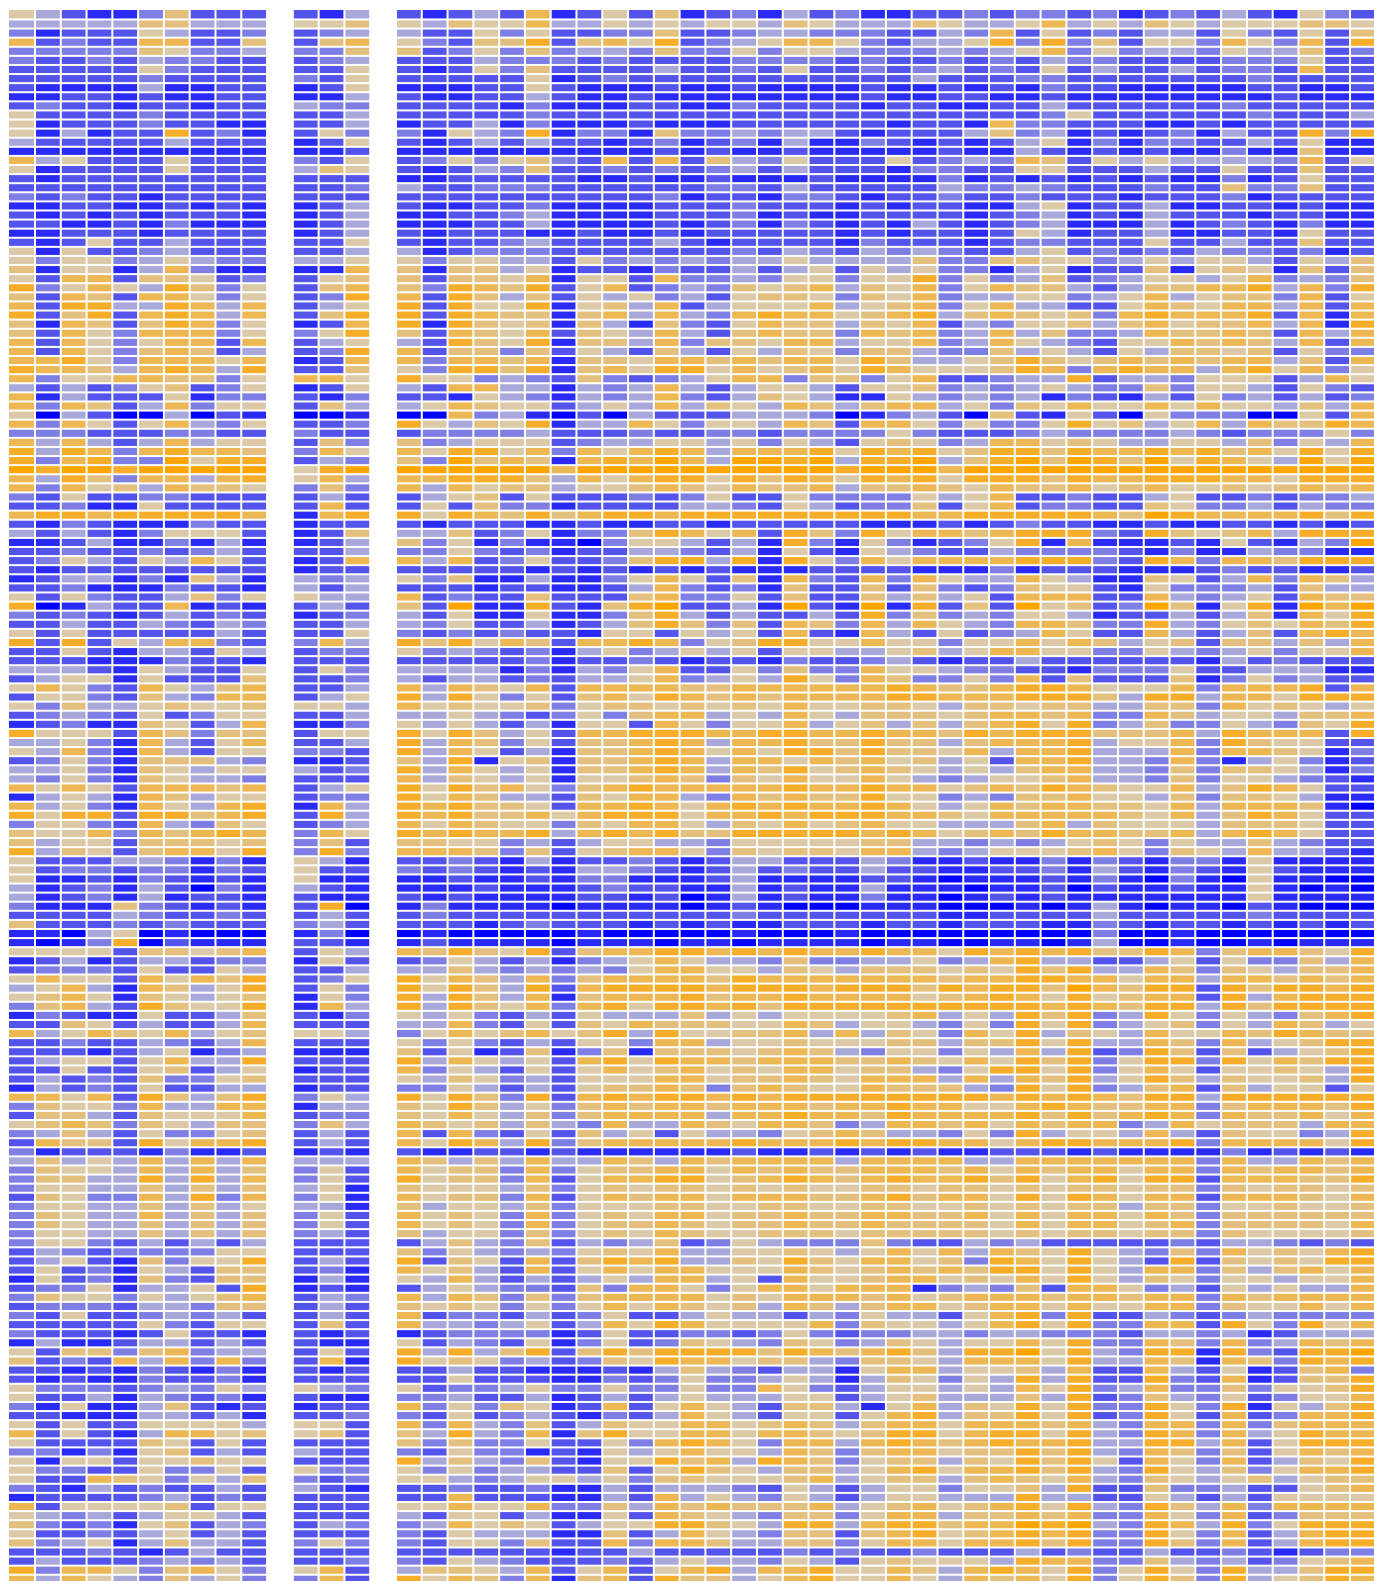

hg444402  
hg444403  
hg444404  
hg444405  
hg444406  
hg444407  
hg444408  
hg444409  
hg444410  
hg444411  
hg444412  
hg444413  
hg444414  
hg444415  
hg444416  
hg444417  
hg444418  
hg444419  
hg444420  
hg444421  
hg444422  
hg444423  
hg444424  
hg444425  
hg444426  
hg444427  
hg444428  
hg444429  
hg444430  
hg444431  
hg444432  
hg444433  
hg444434  
hg444435  
hg444436  
hg444437  
hg444438  
hg444439  
hg444440  
hg444441  
hg444442  
hg444443  
hg444444  
hg444445  
hg444446  
hg444447  
hg444448  
hg444449  
hg444450  
hg444451  
hg444452  
hg444453  
hg444454  
hg444455  
hg444456  
hg444457  
hg444458  
hg444459  
hg444460  
hg444461  
hg444462  
hg444463  
hg444464  
hg444465  
hg444466  
hg444467  
hg444468  
hg444469  
hg444470  
hg444471  
hg444472  
hg444473  
hg444474  
hg444475  
hg444476  
hg444477  
hg444478  
hg444479  
hg444480  
hg444481  
hg444482  
hg444483  
hg444484  
hg444485  
hg444486  
hg444487  
hg444488  
hg444489  
hg444490  
hg444491  
hg444492  
hg444493  
hg444494  
hg444495  
hg444496  
hg444497  
hg444498  
hg444499  
hg444500

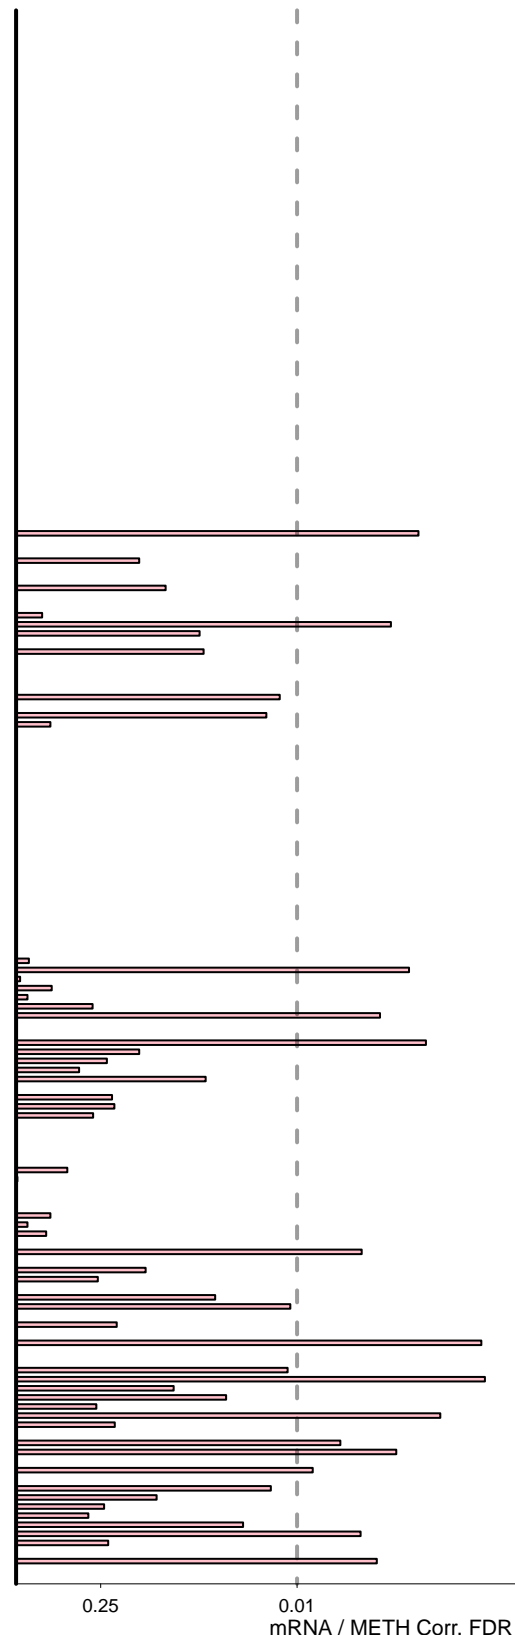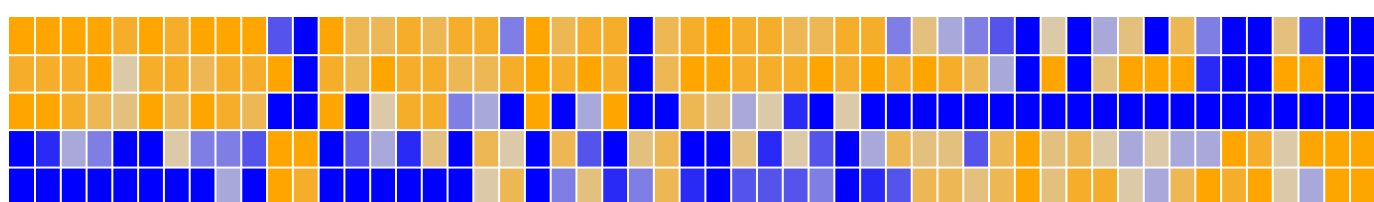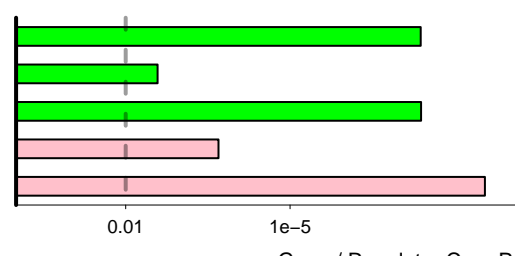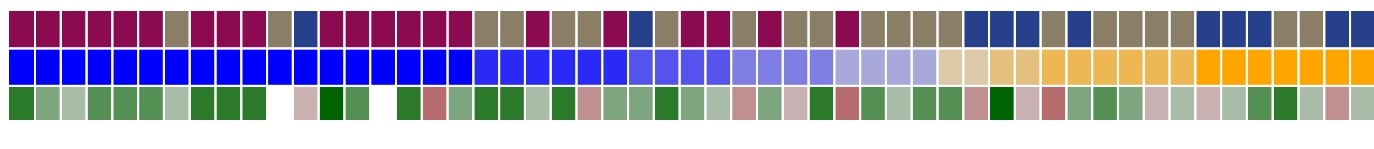

S2391  
S2521  
S2216  
S2718  
S2357  
S2374  
S2596  
S2765  
S2320  
S2406  
S2350  
S2470  
S2408  
S2761  
S2667  
S2510  
S2379  
S2373  
S2381  
S2654  
S2400  
S2380  
S2097  
S2330  
S2686  
S2423  
S2508  
S2279  
S2247  
S2668  
S2333  
S2392  
S2189  
S2734  
S2153  
S2650  
S2405  
S2583  
S2770A  
S2365  
S2338  
S2800  
S2812  
S2549  
S2410  
S2731  
S2261  
S2688  
S2767  
S2495  
S2125  
S2356

# TLE4

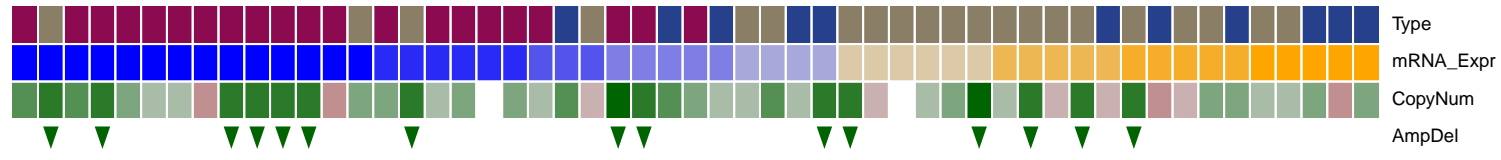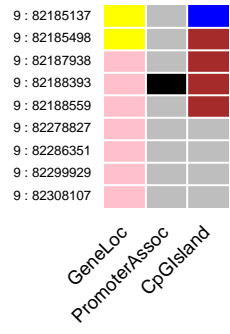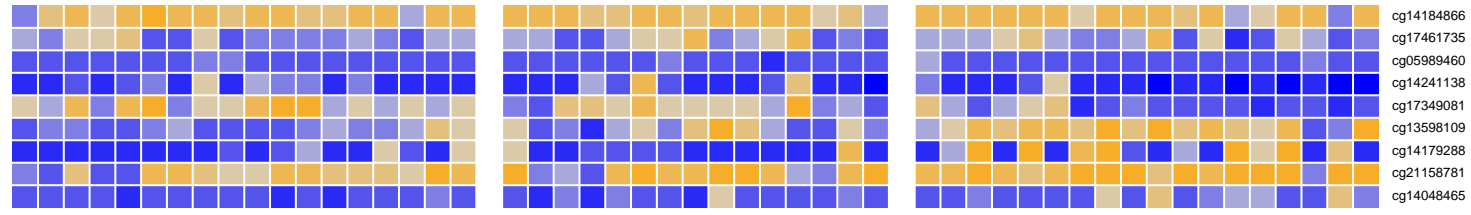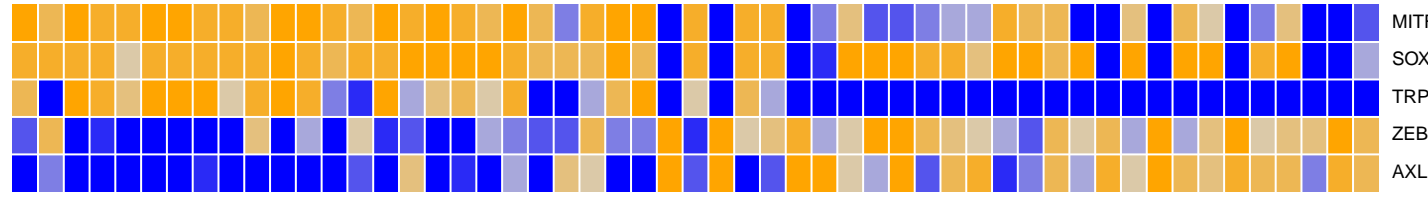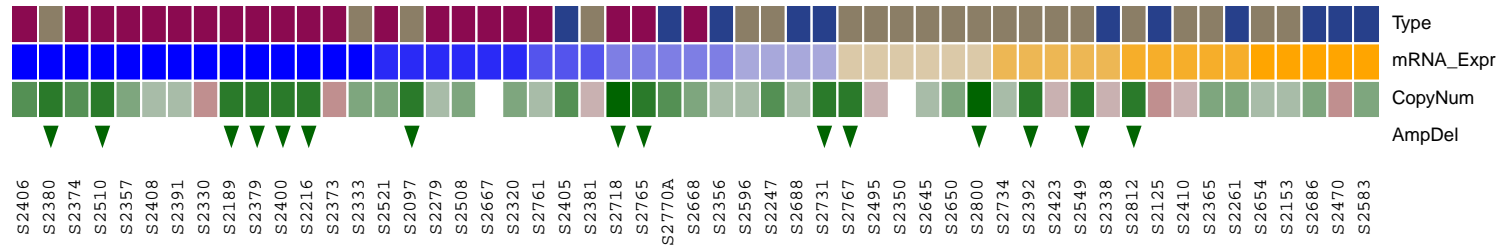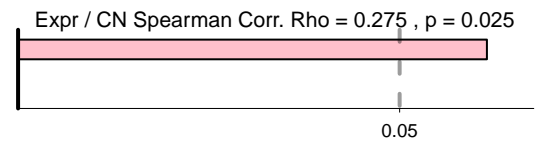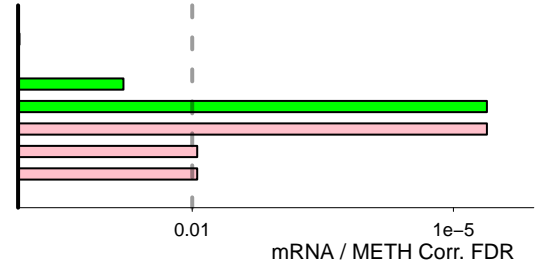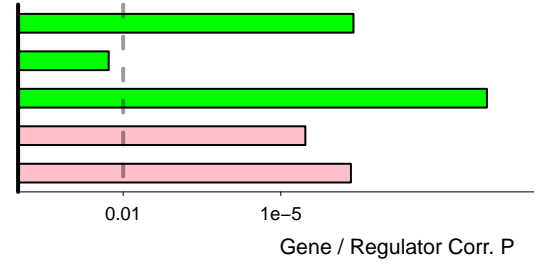

# COL5A1

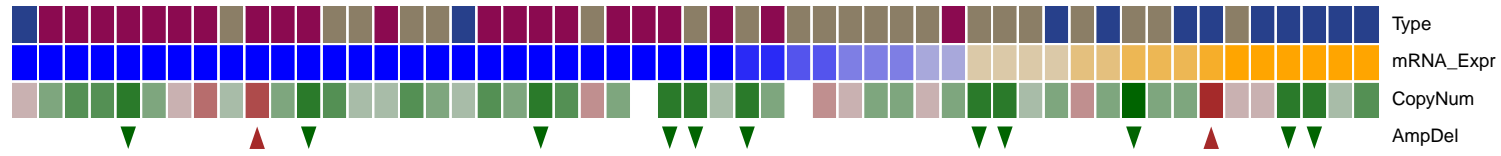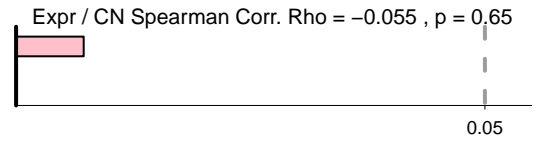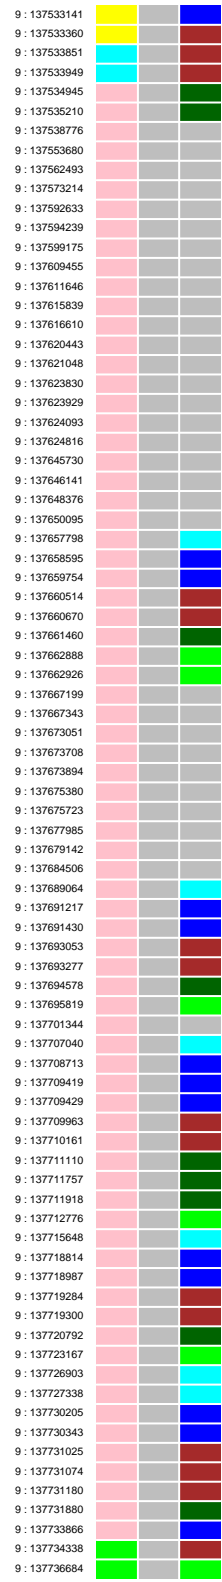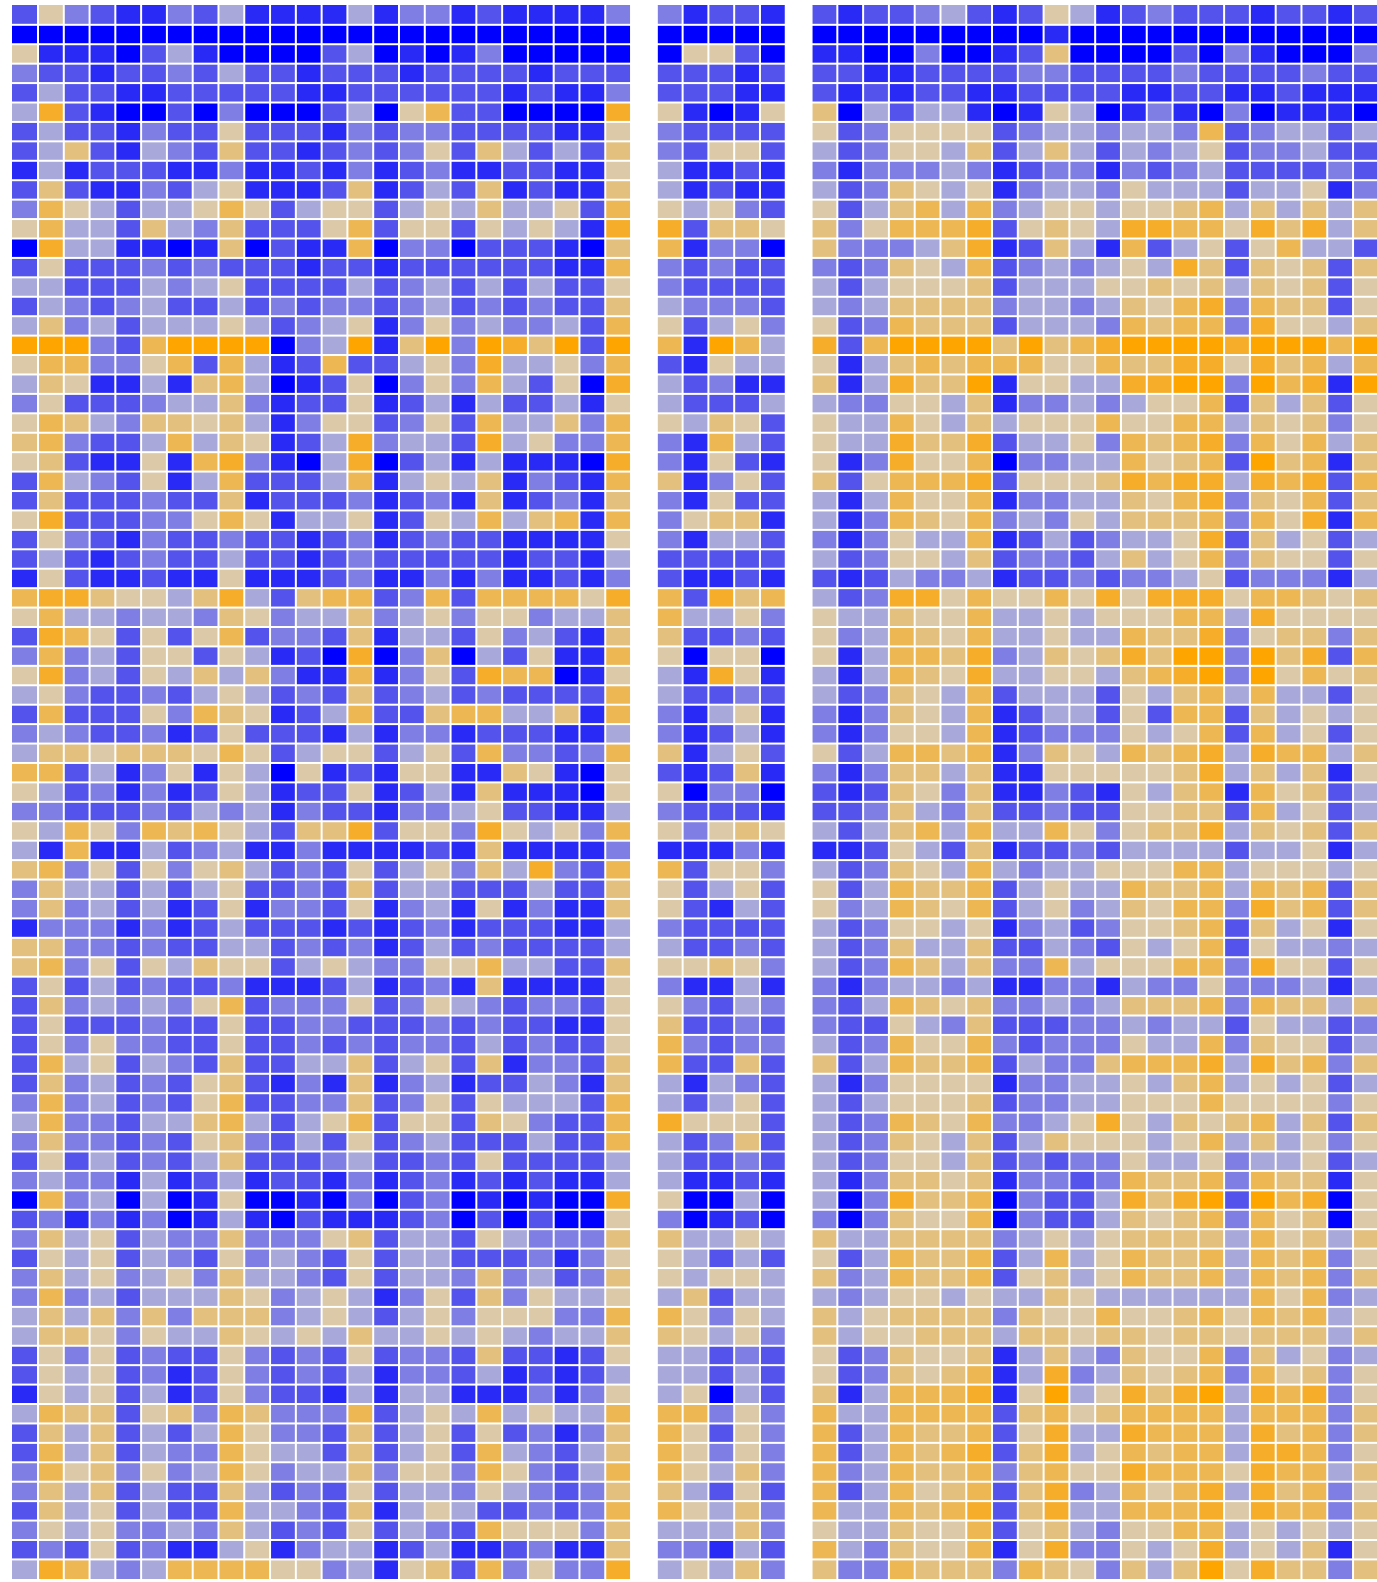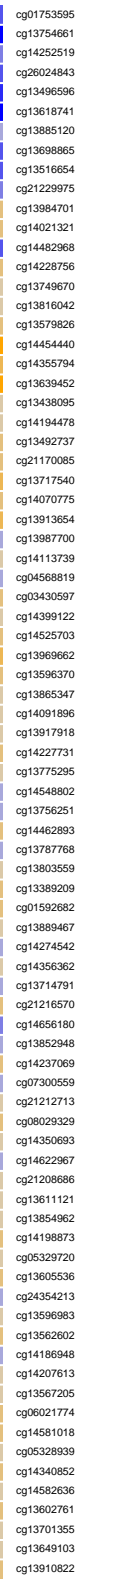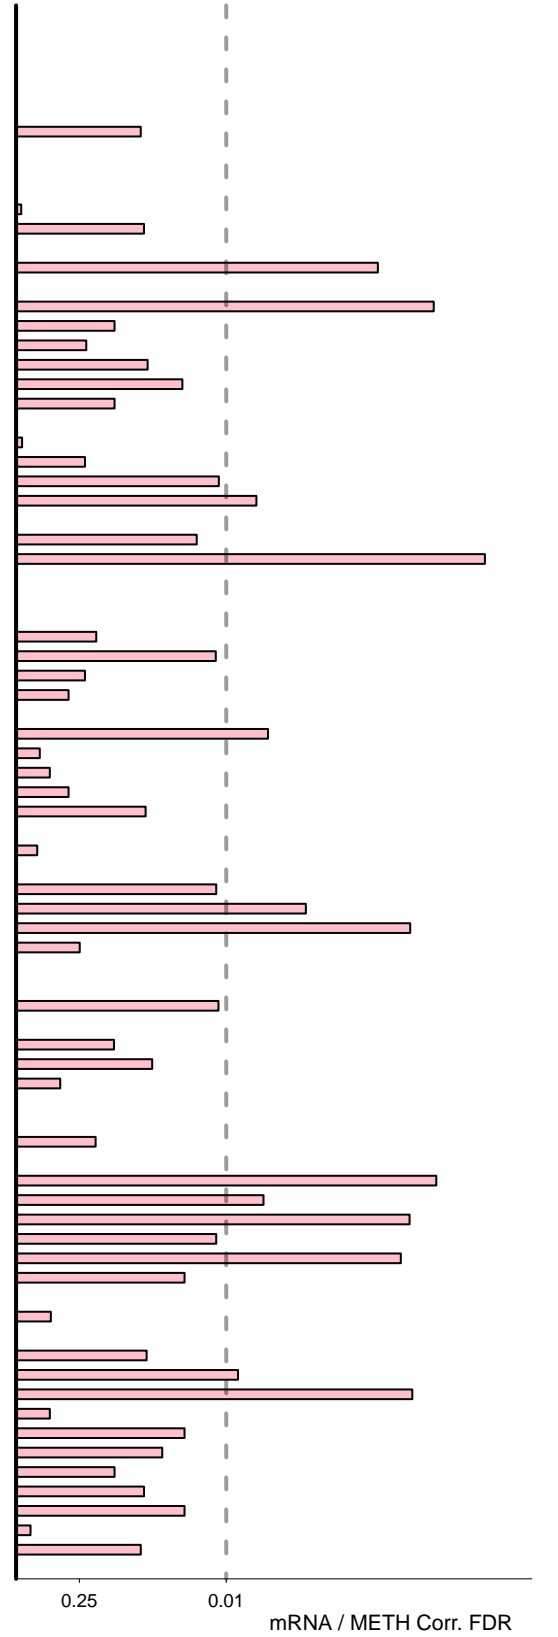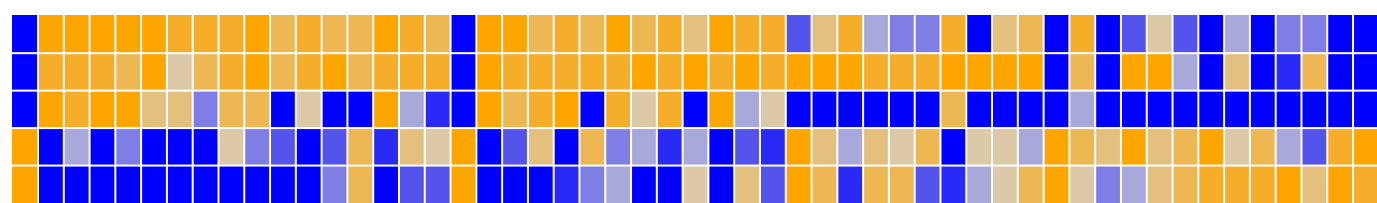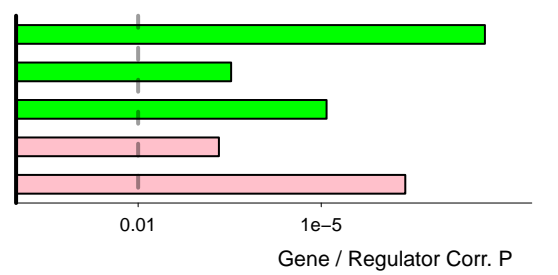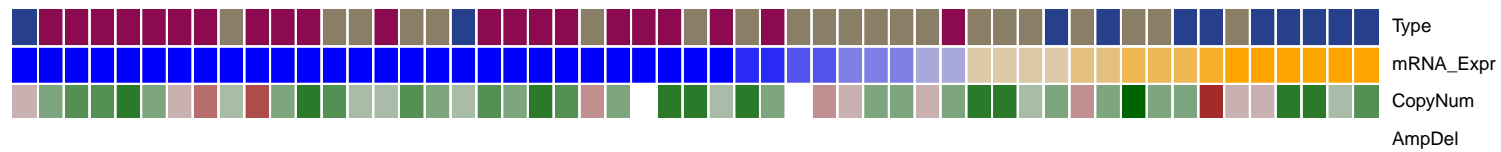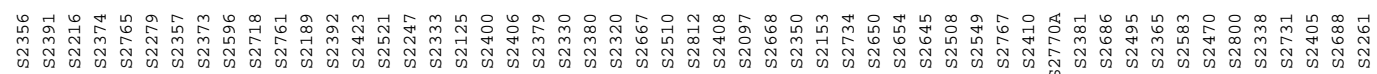

# C12ORF75

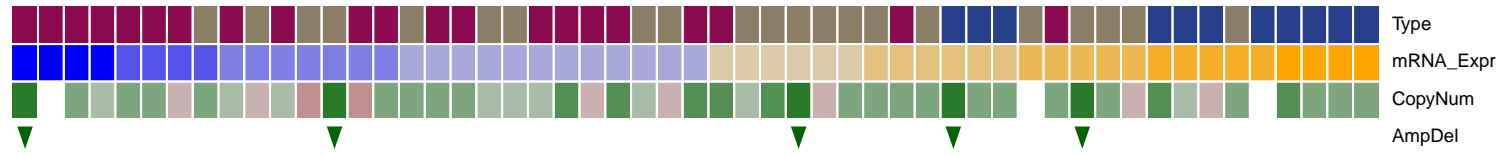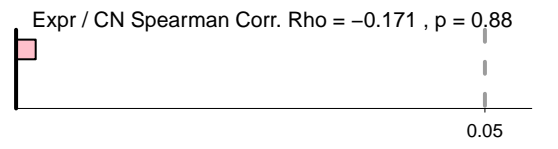

12 : 105630720  
 12 : 105633626  
 12 : 105664124  
 12 : 105689861  
 12 : 105710210  
 12 : 105712307  
 12 : 105723904  
 12 : 105724039  
 12 : 105724140  
 12 : 105725112  
 12 : 105727197  
 12 : 105744023  
 12 : 105747184  
 12 : 105759219  
 12 : 105761853

GeneLoc  
 PromoterAssoc  
 CpGIsland

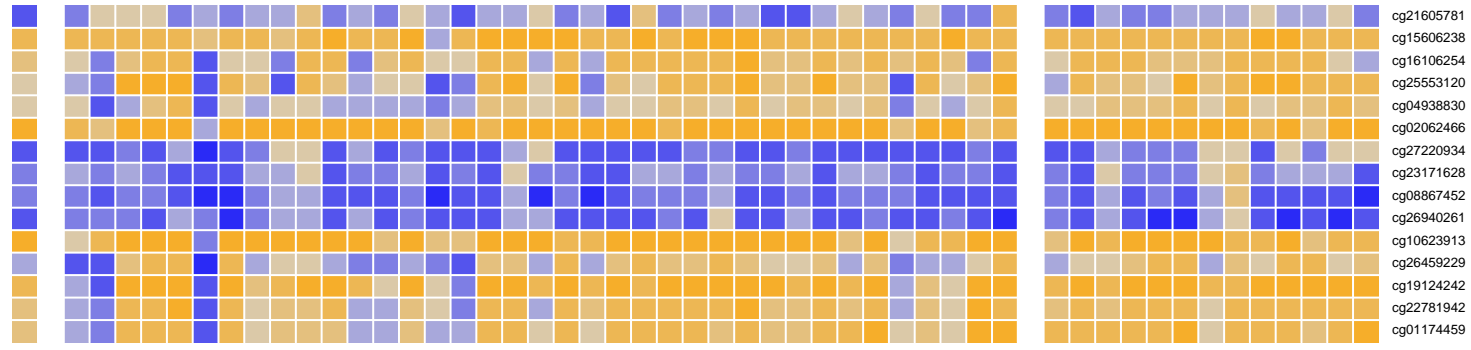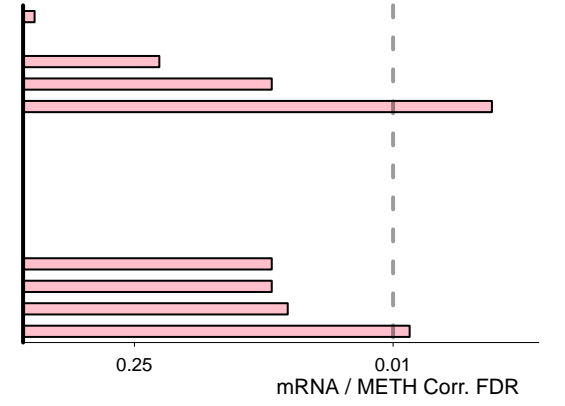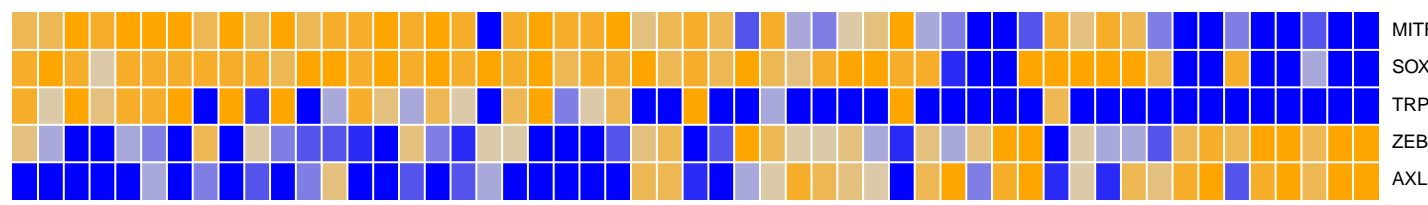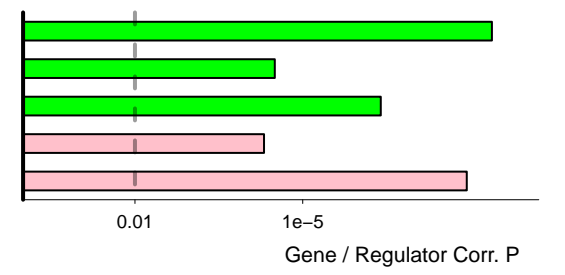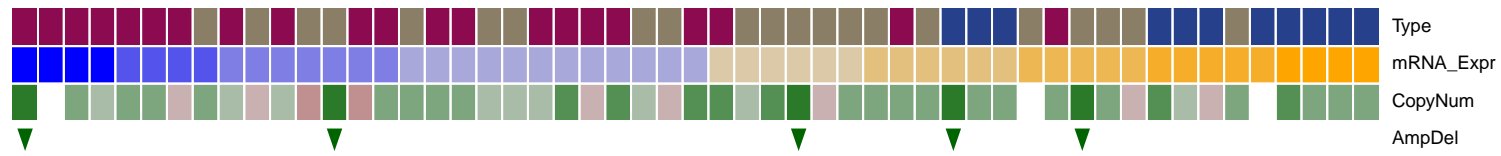

S2379  
 S2667  
 S2374  
 S2357  
 S2216  
 S2320  
 S2391  
 S2380  
 S2408  
 S2333  
 S2765  
 S2392  
 S2097  
 S2510  
 S2279  
 S2247  
 S2718  
 S2668  
 S2549  
 S2596  
 S2400  
 S2373  
 S2189  
 S2406  
 S2153  
 S2423  
 S2330  
 S2761  
 S2495  
 S2381  
 S2800  
 S2654  
 S2365  
 S2812  
 S2521  
 S2650  
 S2731  
 S2686  
 S2470  
 S2350  
 S2508  
 S2767  
 S2734  
 S2410  
 S2405  
 S2338  
 S2688  
 S2645  
 S2261  
 S2770A  
 S2583  
 S2356  
 S2125

# RRAS2

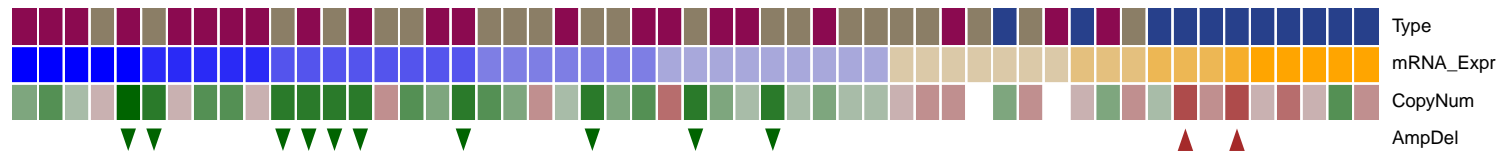

11:14382755  
11:14381234  
11:14380999  
11:14380918  
11:14380851  
11:14380825  
11:14376795  
11:14367071  
11:14363863  
11:14340592  
11:14335070  
11:14331601  
11:14323224  
11:14322256  
11:14309451

GeneLoc  
PromoterAssoc  
CpGIsland

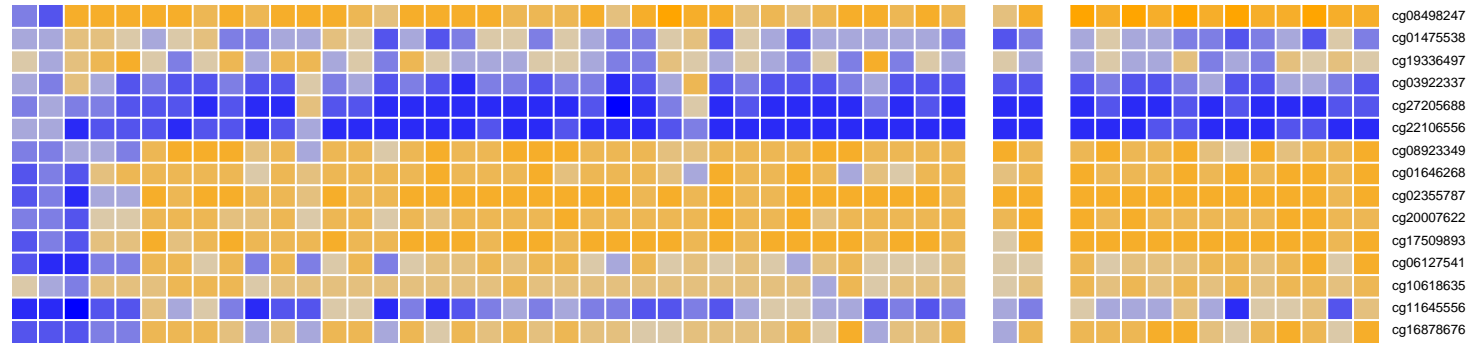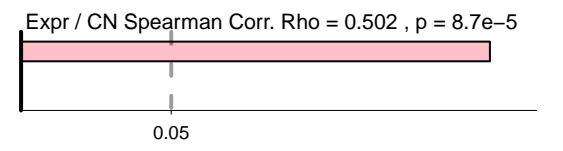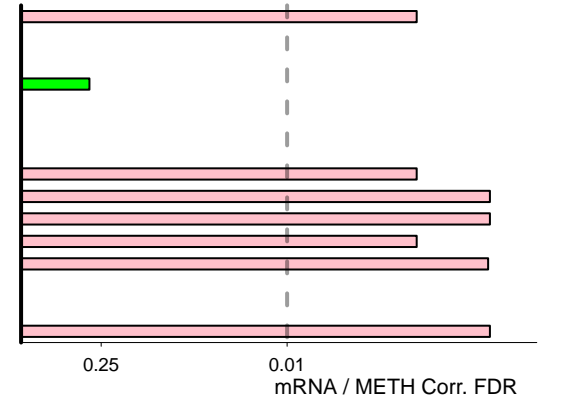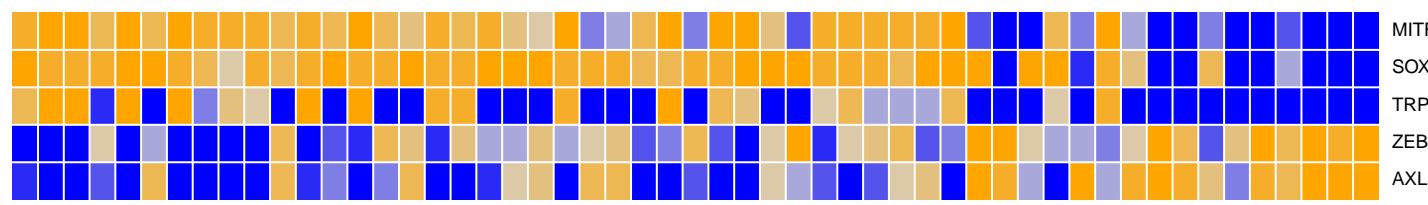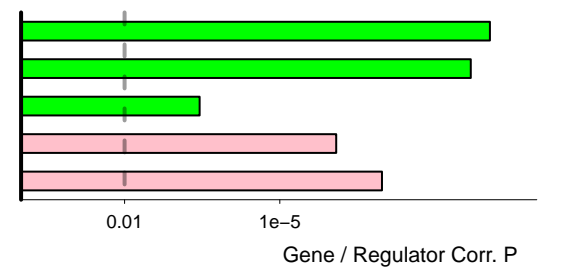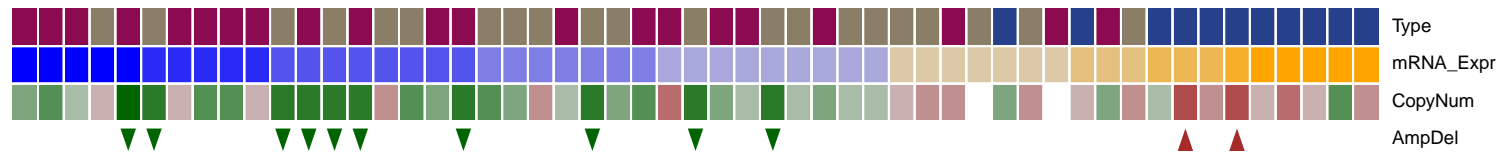

S2508  
S2374  
S2408  
S2333  
S2400  
S2410  
S2391  
S2373  
S2357  
S2189  
S2423  
S2330  
S2392  
S2521  
S2380  
S2153  
S2510  
S2379  
S2734  
S2812  
S2365  
S2216  
S2654  
S2650  
S2761  
S2765  
S2645  
S2406  
S2279  
S2767  
S2495  
S2668  
S2596  
S2247  
S2381  
S2097  
S2718  
S2350  
S2470  
S2549  
S2667  
S2731  
S2320  
S2800  
S2356  
S2338  
S2405  
S2686  
S2261  
S2583  
S2770A  
S2688  
S2125

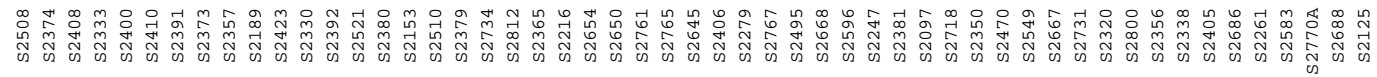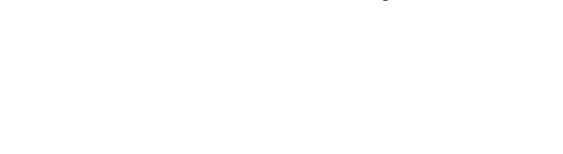



# MYLK

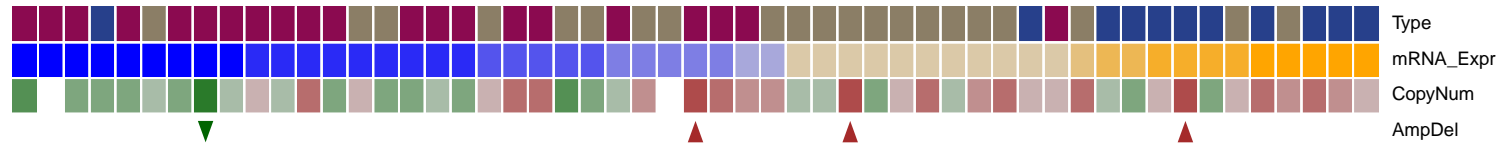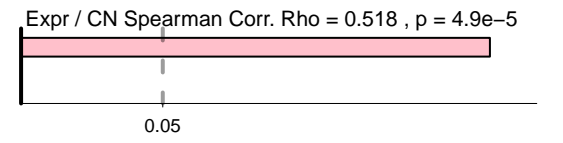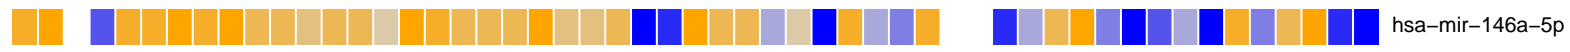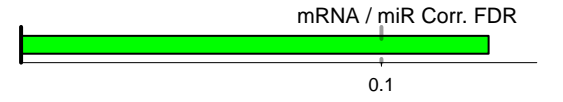

3 : 123603618  
3 : 123603539  
3 : 123603455  
3 : 123603311  
3 : 123603308  
3 : 123603306  
3 : 123602795  
3 : 123602768  
3 : 123602485  
3 : 123601558  
3 : 123600215  
3 : 123597199  
3 : 123589179  
3 : 123579507  
3 : 123577794  
3 : 123535716  
3 : 123528097  
3 : 123518635  
3 : 123509516  
3 : 123506296  
3 : 123501051  
3 : 123498880  
3 : 123493248  
3 : 123486251  
3 : 123476518  
3 : 123459423  
3 : 123452994  
3 : 123419622  
3 : 123419554  
3 : 123418791  
3 : 123418713  
3 : 123417080  
3 : 123414733  
3 : 123411211  
3 : 123411198  
3 : 123407570  
3 : 123398346  
3 : 123382403  
3 : 123380206  
3 : 123372199  
3 : 123371420  
3 : 123361218  
3 : 123352864  
3 : 123340814  
3 : 123340306  
3 : 123339918  
3 : 123339568  
3 : 123339417  
3 : 123339334

GeneLoc  
PromoterAssoc  
CpGIsland

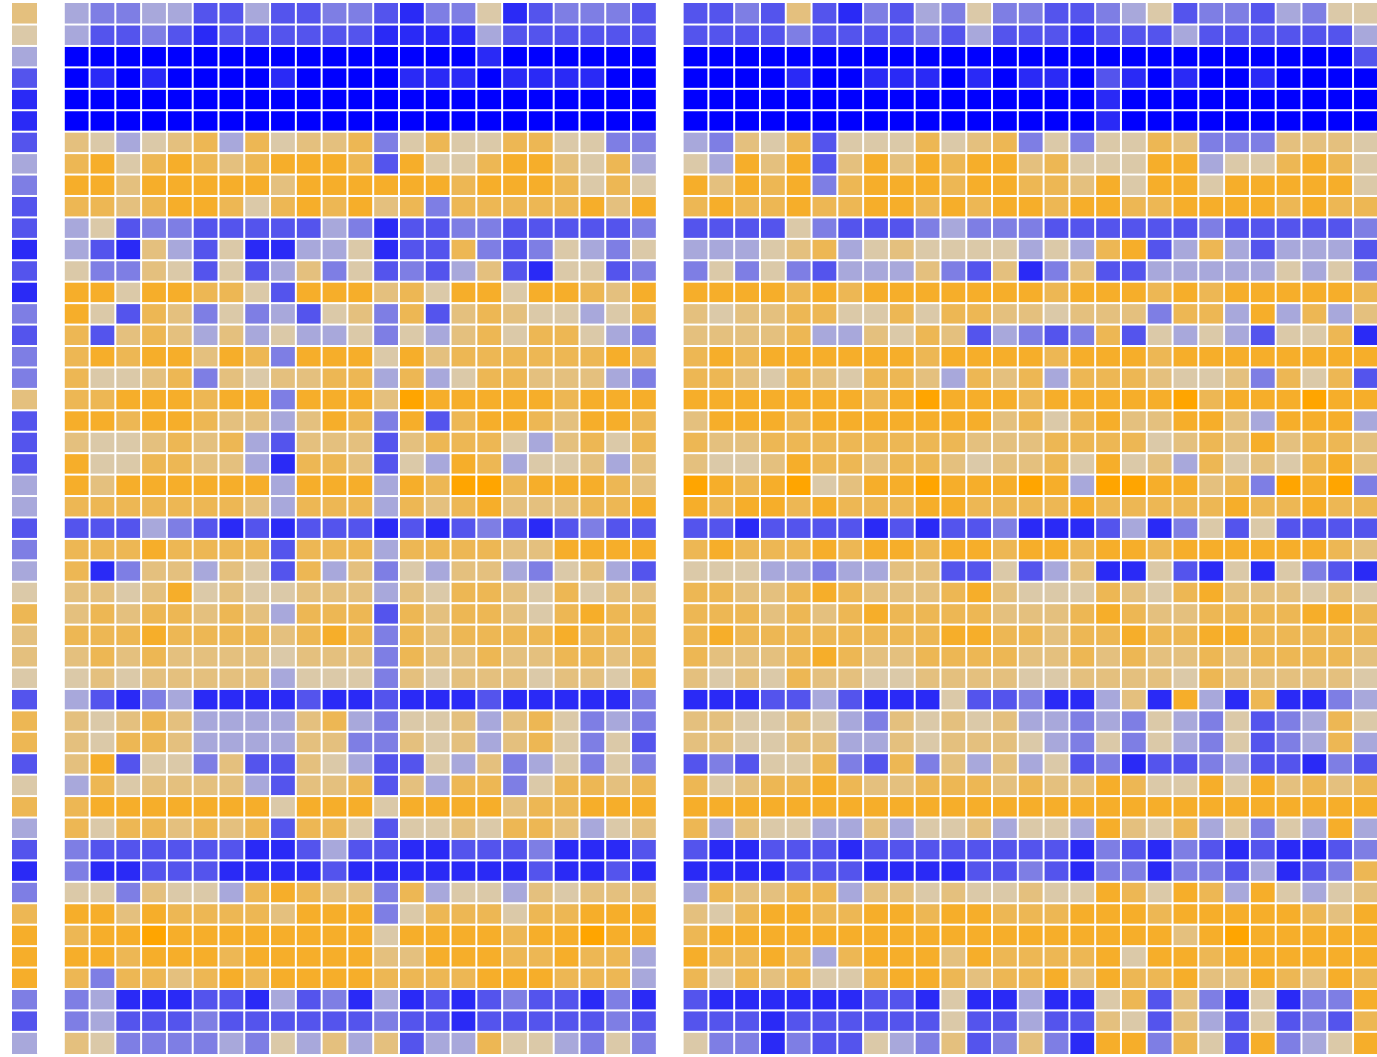

cg03731616  
cg11359984  
cg00890840  
cg07802917  
cg04583043  
cg16531585  
cg27345757  
cg00268185  
cg04376312  
cg23227291  
cg23184556  
cg09707641  
cg01894985  
cg03286987  
cg03473016  
cg07621385  
cg20839145  
cg05996671  
cg08439487  
cg03892735  
cg09395562  
cg23726408  
cg03387092  
cg18767287  
cg12235788  
cg26394191  
cg17787502  
cg23344121  
cg01860459  
cg20230305  
cg11490961  
cg00574513  
cg18731398  
cg19611163  
cg02558132  
cg13342710  
cg02012769  
cg20936226  
cg03874653  
cg13066481  
cg07638500  
cg19090128  
cg03919942  
cg13445604  
cg19534753  
cg16212219  
cg00465319  
cg20669834  
cg20050484

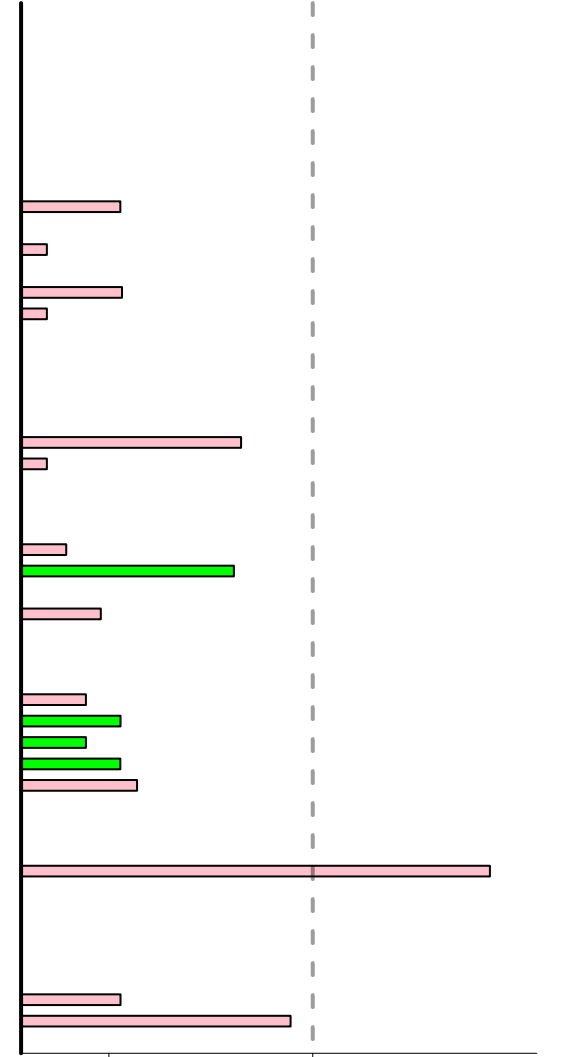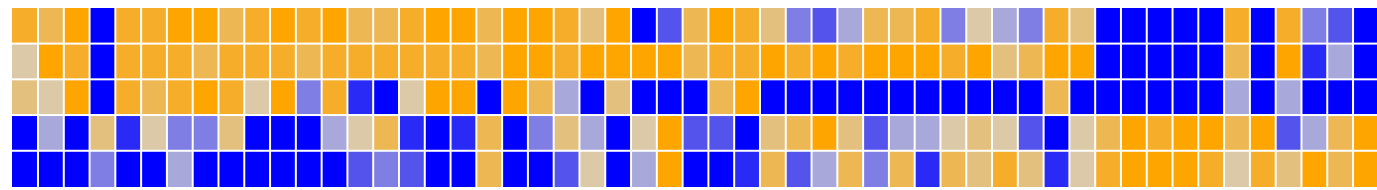

MITF  
SOX10  
TRPM1  
ZEB1  
AXL

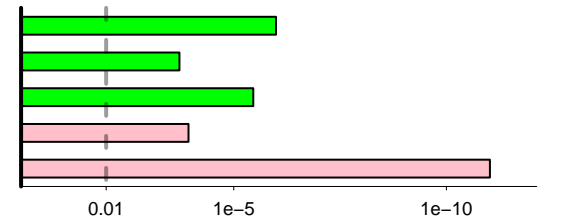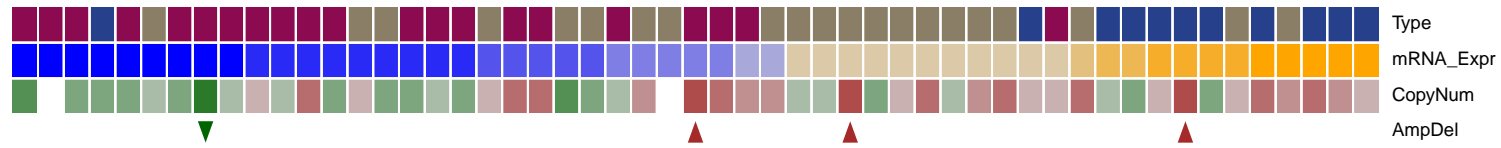

S2357  
S2667  
S2391  
S2686  
S2510  
S2596  
S2320  
S2765  
S2379  
S2189  
S2408  
S2373  
S2216  
S2333  
S2380  
S2668  
S2374  
S2521  
S2423  
S2400  
S2718  
S2247  
S2812  
S2279  
S2549  
S2350  
S2761  
S2406  
S2330  
S2153  
S2645  
S2495  
S2650  
S2392  
S2410  
S2734  
S2654  
S2365  
S2800  
S2405  
S2508  
S2767  
S2338  
S2356  
S2688  
S2770A  
S2261  
S2381  
S2470  
S2097  
S2731  
S2583  
S2125

Type  
mRNA\_Expr  
CopyNum  
AmpDel

# CPA4

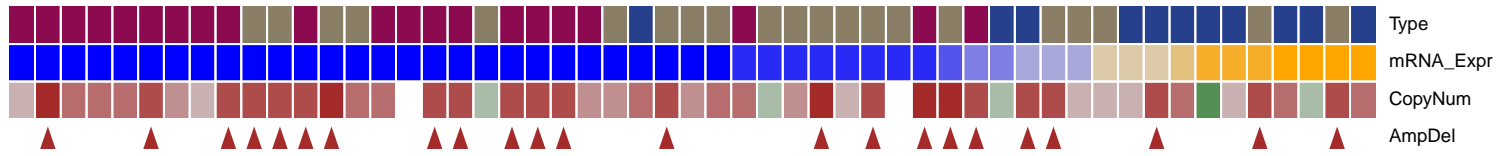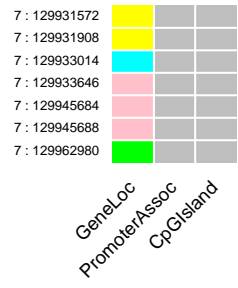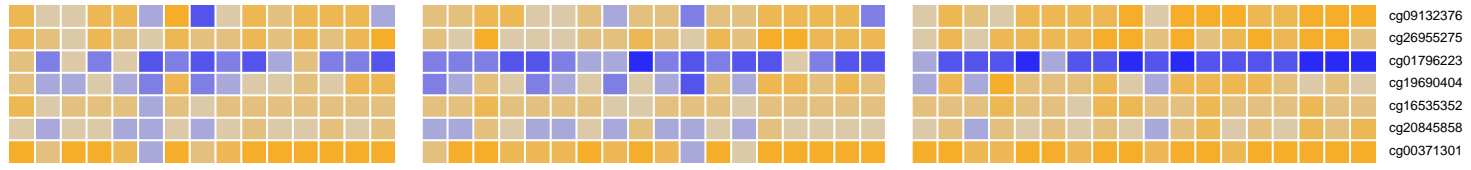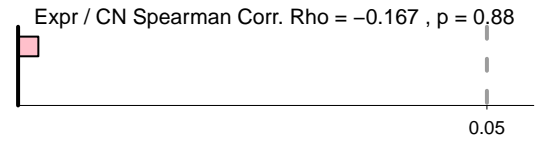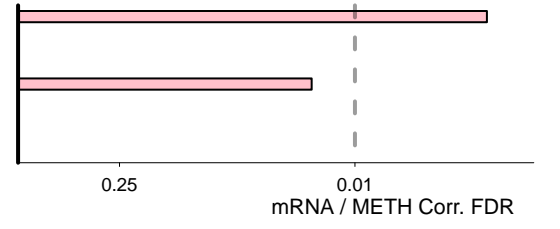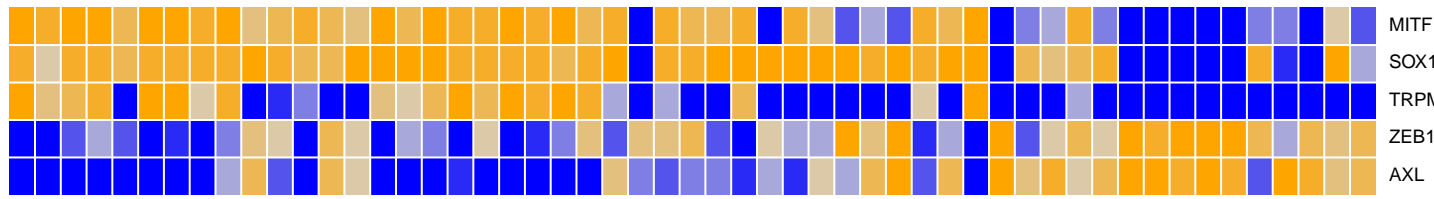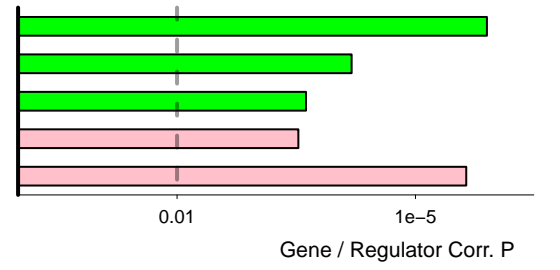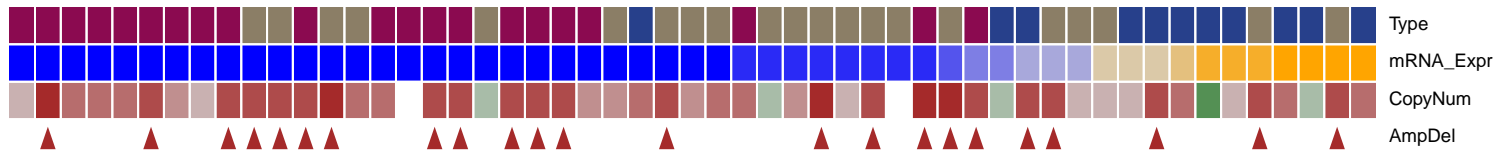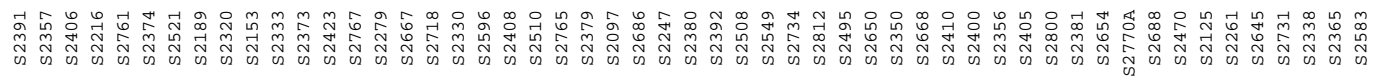

# CCDC80

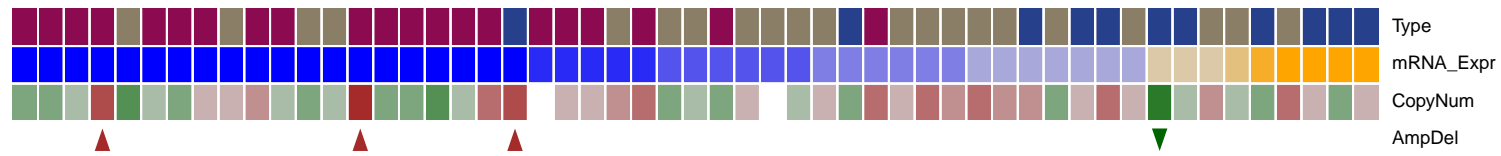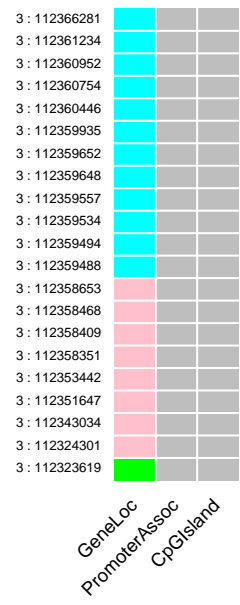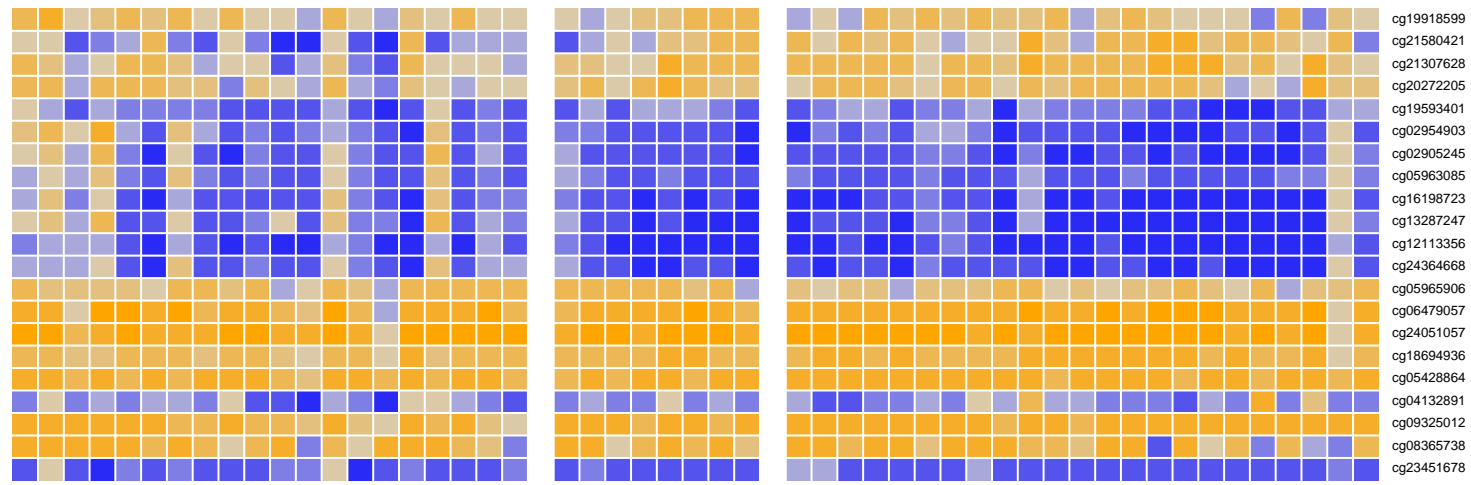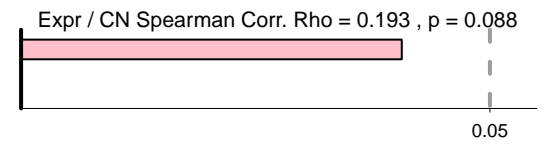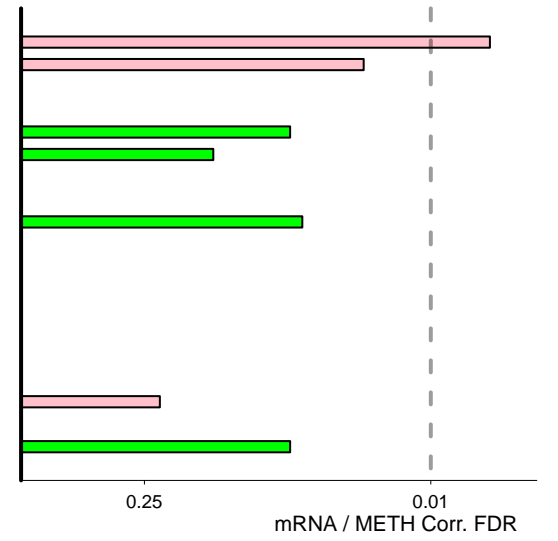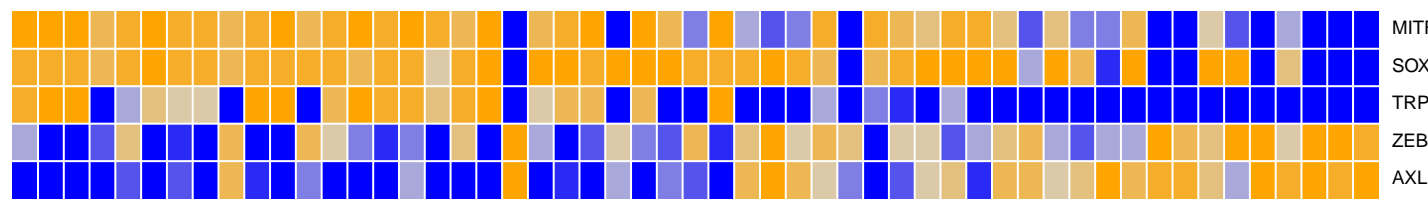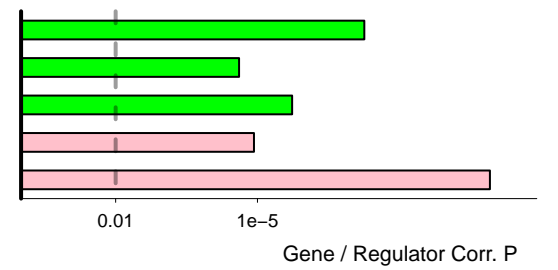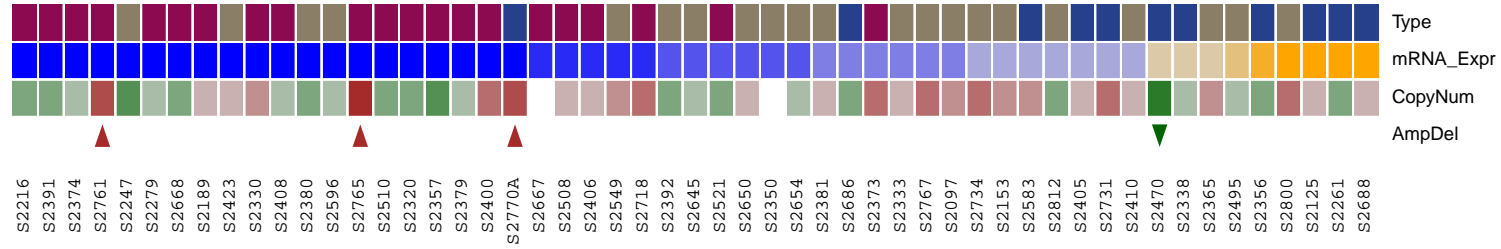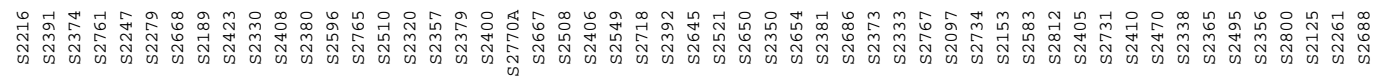

# DDX58

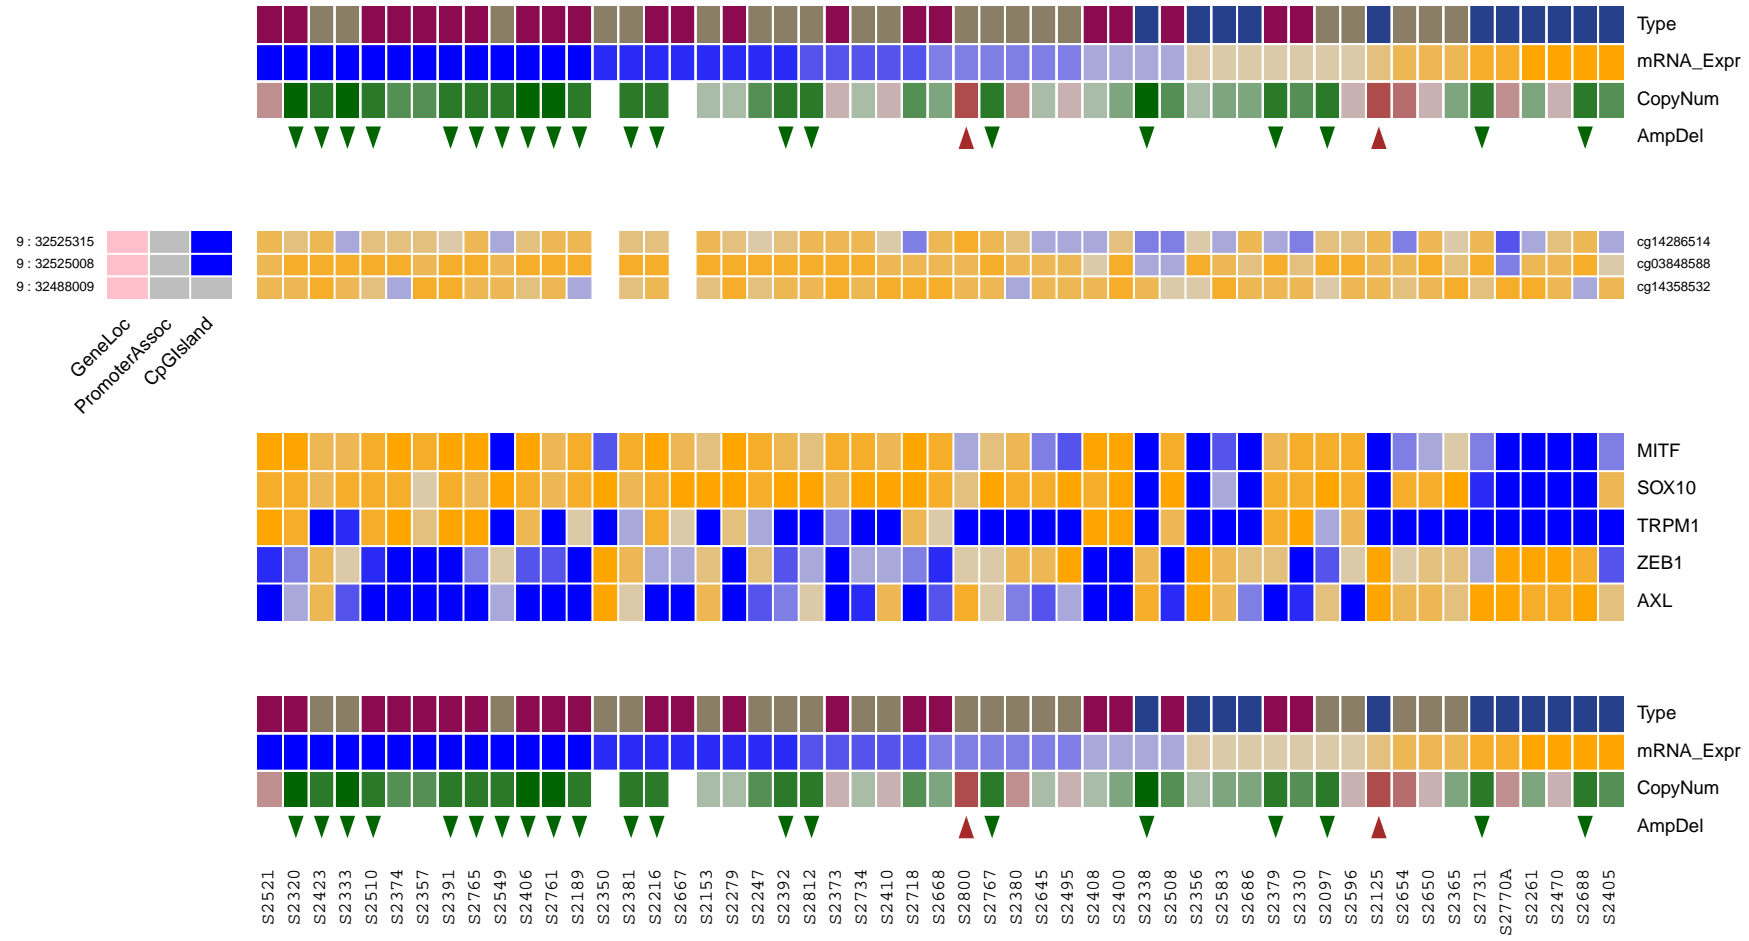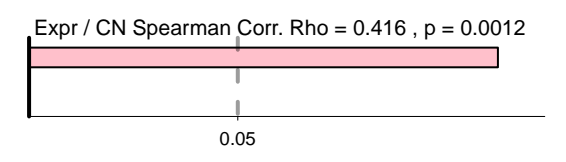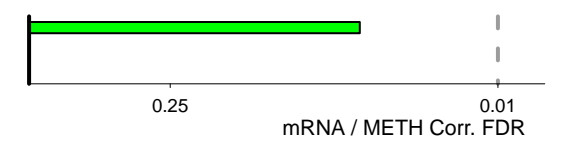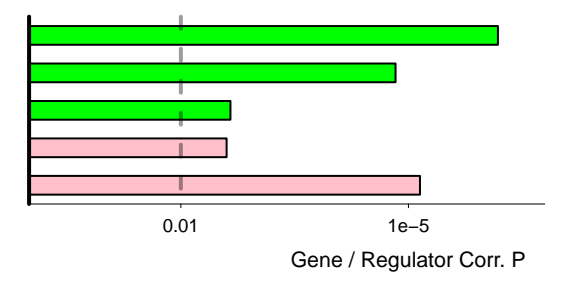

# SLC9A7

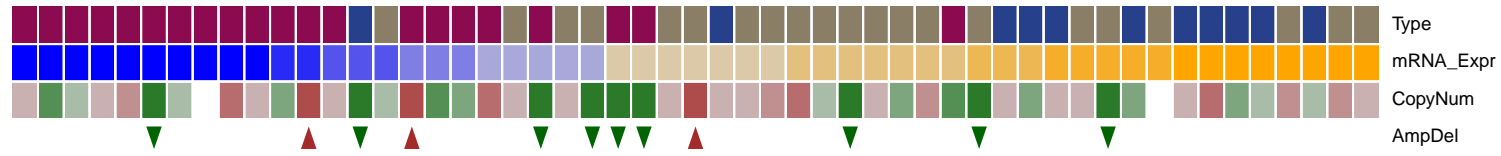

X : 46619235  
 X : 46618968  
 X : 46618860  
 X : 46618762  
 X : 46618639  
 X : 46618632  
 X : 46618630  
 X : 46618164  
 X : 46617524  
 X : 46616842  
 X : 46614442

GeneLoc  
 PromoterAssoc  
 CpGIsland

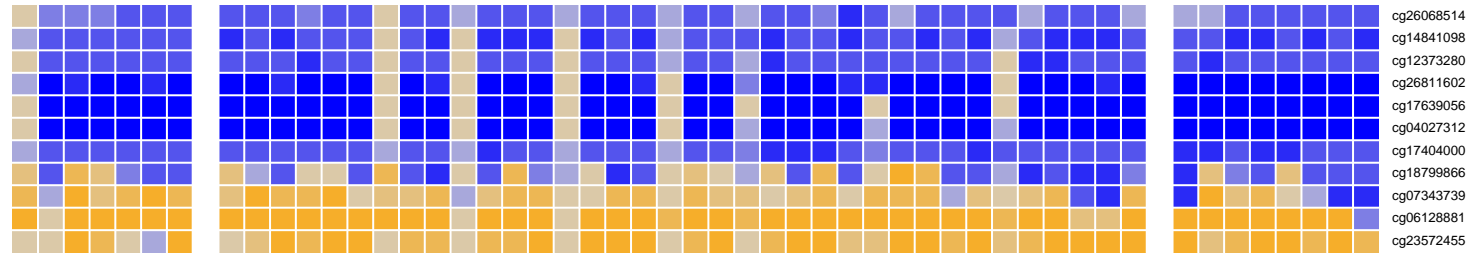

cg26068514  
 cg14841098  
 cg12373280  
 cg26811602  
 cg17639056  
 cg04027312  
 cg17404000  
 cg18799866  
 cg07343739  
 cg06128881  
 cg23572455

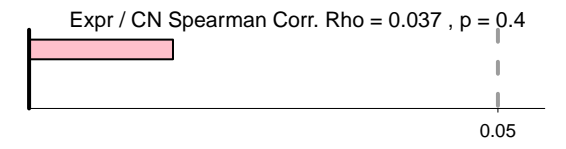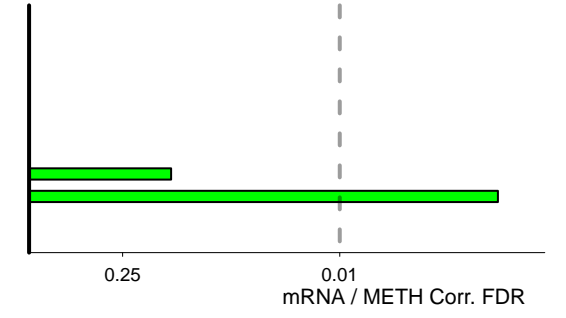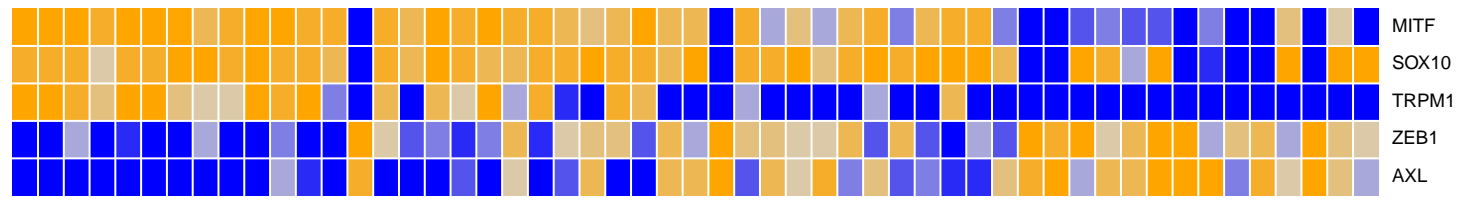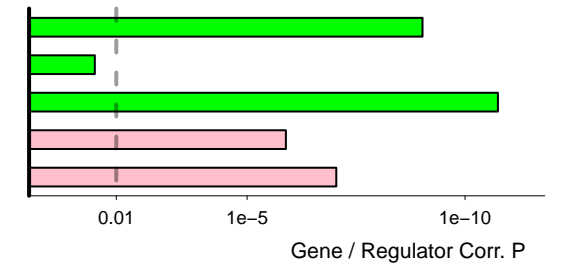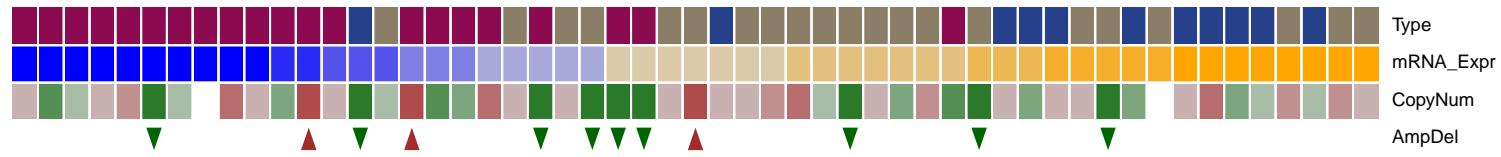

S2391  
 S2374  
 S2216  
 S2357  
 S2521  
 S2408  
 S2279  
 S2667  
 S2189  
 S2400  
 S2320  
 S2330  
 S2373  
 S2470  
 S2596  
 S2761  
 S2718  
 S2668  
 S2765  
 S2381  
 S2510  
 S2333  
 S2153  
 S2379  
 S2406  
 S2423  
 S2410  
 S2125  
 S2247  
 S2650  
 S2767  
 S2800  
 S2380  
 S2097  
 S2645  
 S2392  
 S2508  
 S2734  
 S2405  
 S2261  
 S2688  
 S2495  
 S2654  
 S2583  
 S2350  
 S2770A  
 S2731  
 S2686  
 S2338  
 S2812  
 S2356  
 S2365  
 S2549

# ANGPT1

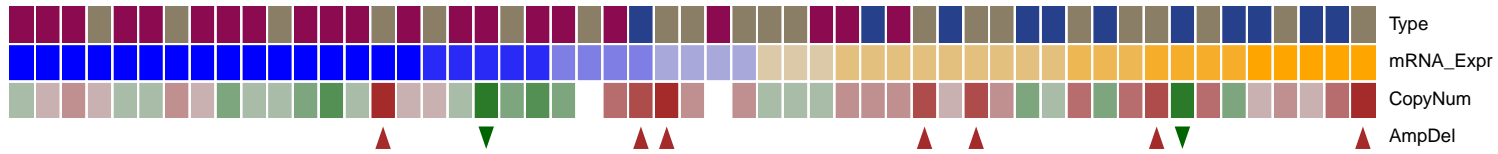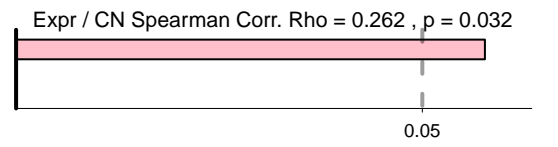

8 : 108511700  
8 : 108511621  
8 : 108511174  
8 : 108510343  
8 : 108510314  
8 : 108510292  
8 : 108510286  
8 : 108510096  
8 : 108509756  
8 : 108499754  
8 : 108468421  
8 : 108467430  
8 : 108457411  
8 : 108441547  
8 : 108432158  
8 : 108401517  
8 : 108393034  
8 : 108370910  
8 : 108359437  
8 : 108351562  
8 : 108344200  
8 : 108314948  
8 : 108298379  
8 : 108263868

GeneLoc  
PromoterAssoc  
CpGIsland

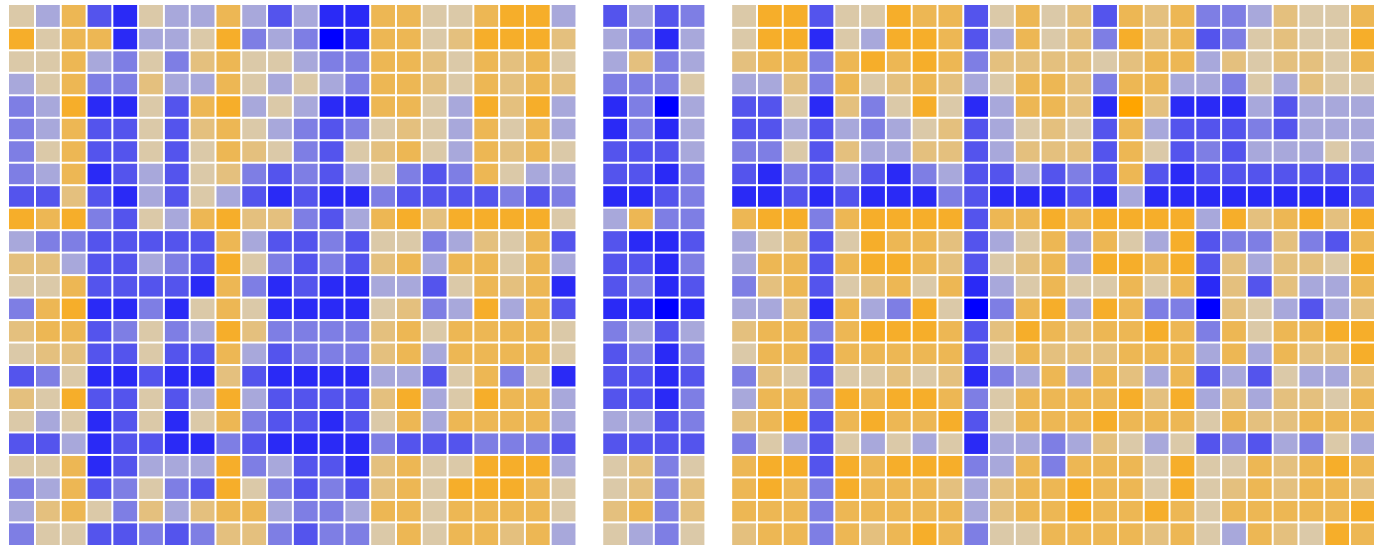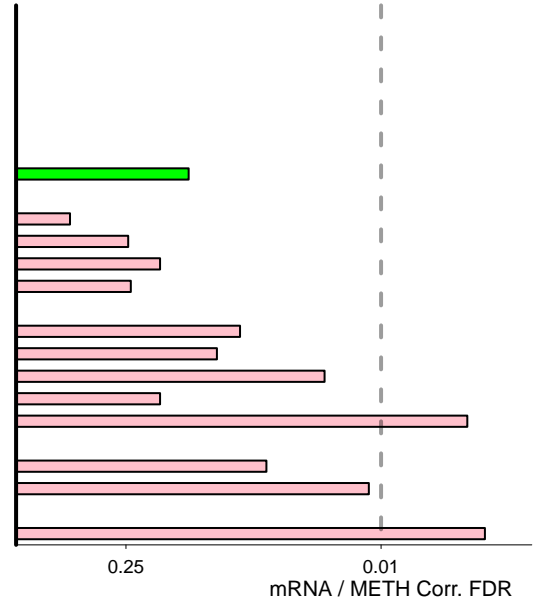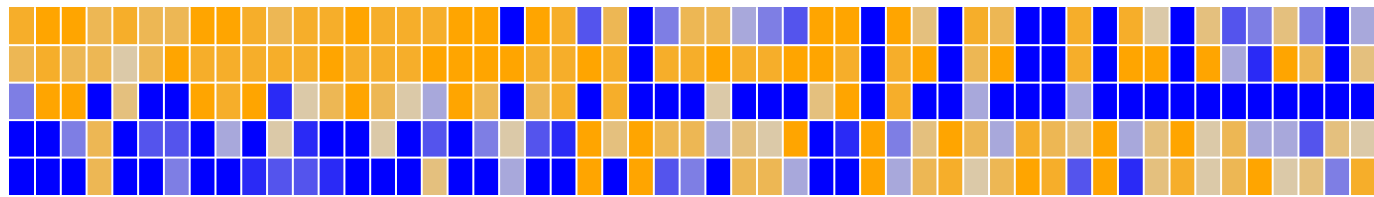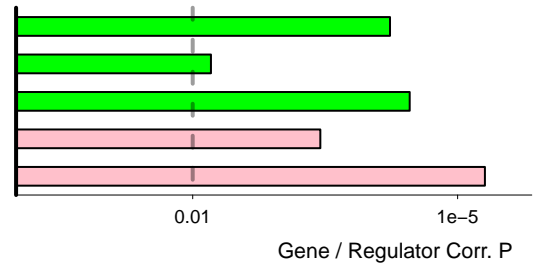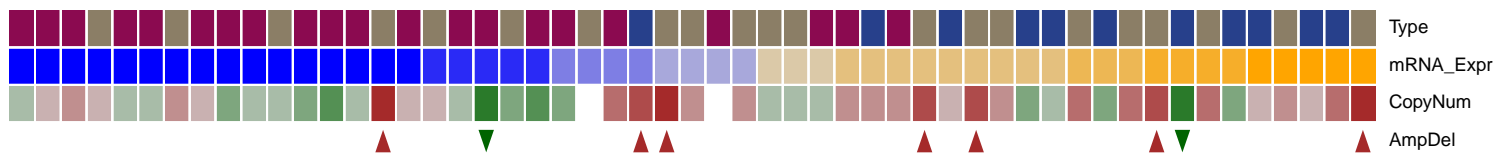

S2373  
S2374  
S2765  
S2423  
S2357  
S2761  
S2392  
S2391  
S2216  
S2330  
S2333  
S2668  
S2508  
S2408  
S2596  
S2189  
S2097  
S2400  
S2718  
S2549  
S2406  
S2510  
S2350  
S2379  
S2770A  
S2645  
S2380  
S2667  
S2650  
S2654  
S2495  
S2279  
S2521  
S2125  
S2320  
S2153  
S2261  
S2381  
S2410  
S2688  
S2338  
S2247  
S2356  
S2734  
S2365  
S2470  
S2767  
S2583  
S2731  
S2812  
S2405  
S2686  
S2800

# STC2

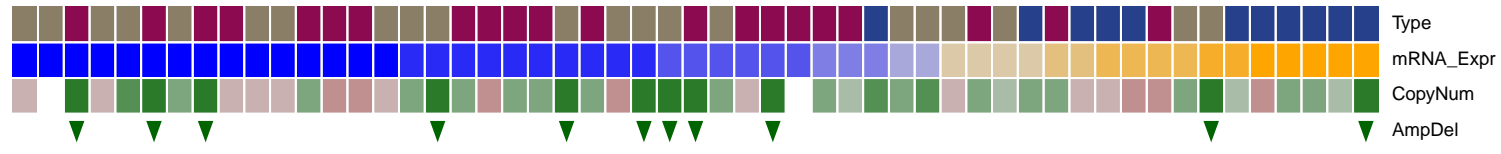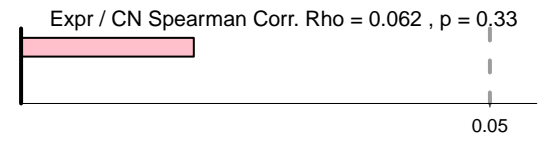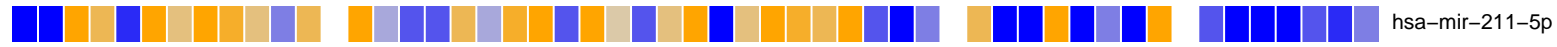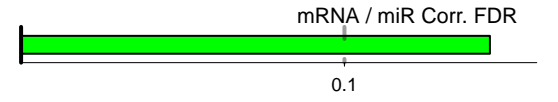

- 5 : 172757702
- 5 : 172757276
- 5 : 172757074
- 5 : 172756999
- 5 : 172756776
- 5 : 172756558
- 5 : 172756550
- 5 : 172756429
- 5 : 172755995
- 5 : 172755856
- 5 : 172755421
- 5 : 172755413
- 5 : 172755183
- 5 : 172755103
- 5 : 172754896
- 5 : 172754848
- 5 : 172754465
- 5 : 172754417
- 5 : 172753741
- 5 : 172753646
- 5 : 172751331
- 5 : 172751269
- 5 : 172751061
- 5 : 172750923
- 5 : 172750611
- 5 : 172750450
- 5 : 172748917
- 5 : 172744941
- 5 : 172744882
- 5 : 172744704
- 5 : 172744670
- 5 : 172743837

GeneLoc  
PromoterAssoc  
CpGIsland

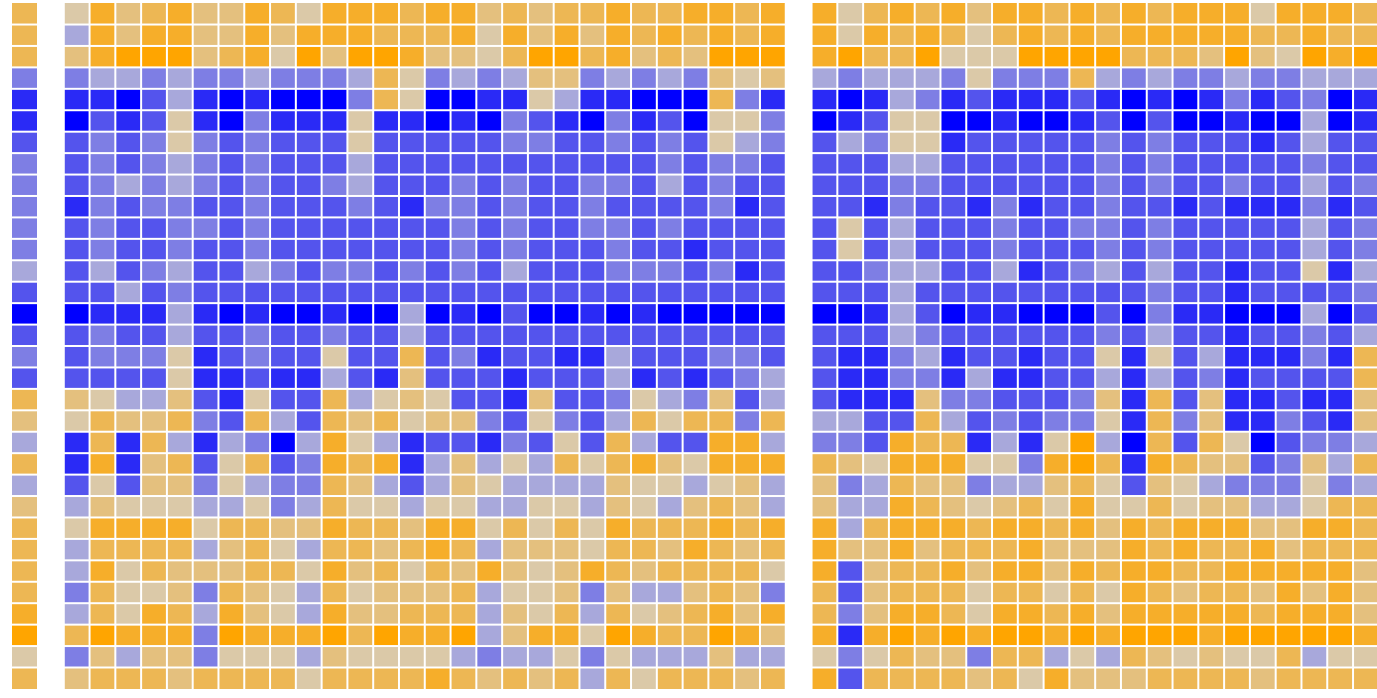

- cg27123016
- cg19728382
- cg26721877
- cg19586881
- cg17802144
- cg16443866
- cg08711858
- cg16600829
- cg22834998
- cg18281743
- cg19673350
- cg18335607
- cg02135395
- cg11457817
- cg18680788
- cg06439005
- cg02138264
- cg19773855
- cg01010188
- cg25592413
- cg01984743
- cg26605683
- cg15420720
- cg19481287
- cg13329346
- cg10625081
- cg20977312
- cg23428905
- cg19878194
- cg03983713
- cg08839053
- cg03846076

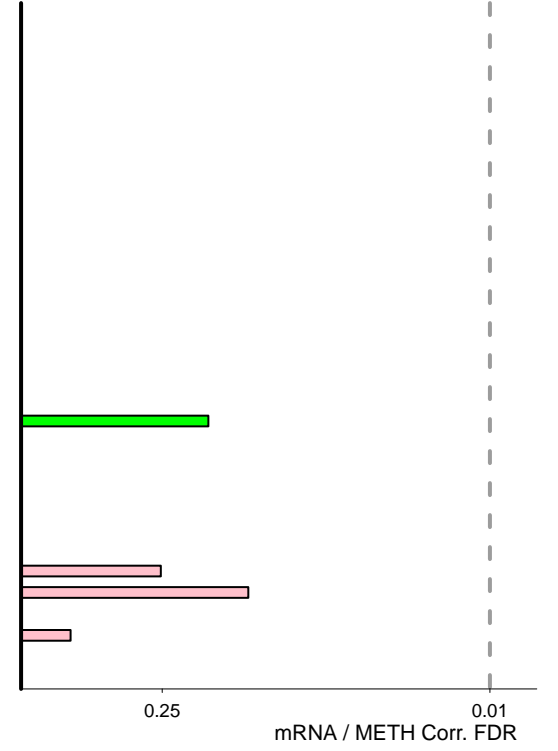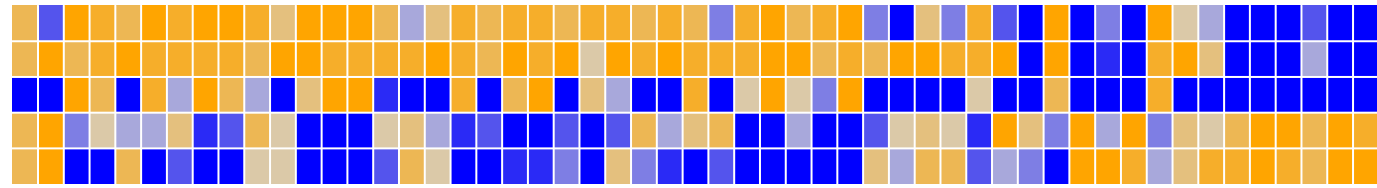

- MITF
- SOX10
- TRPM1
- ZEB1
- AXL

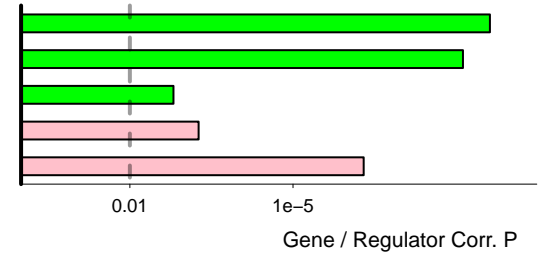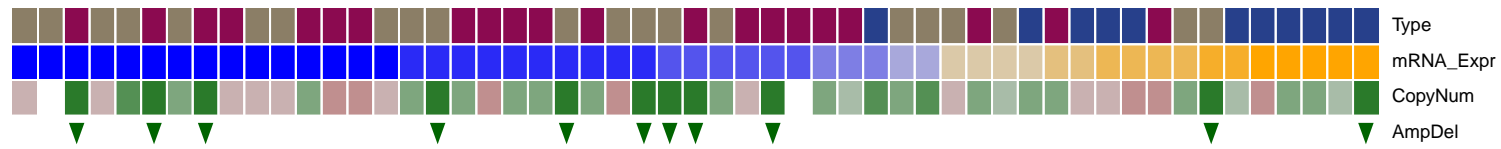

- S2423
- S2350
- S2765
- S2596
- S2410
- S2216
- S2247
- S2521
- S2406
- S2381
- S2767
- S2279
- S2391
- S2374
- S2333
- S2650
- S2812
- S2510
- S2761
- S2508
- S2330
- S2392
- S2097
- S2380
- S2734
- S2379
- S2645
- S2189
- S2400
- S2667
- S2373
- S2408
- S2405
- S2549
- S2153
- S2654
- S2668
- S2495
- S2686
- S2718
- S2770A
- S2731
- S2470
- S2320
- S2365
- S2800
- S2338
- S2125
- S2261
- S2583
- S2356
- S2688

# PODXL

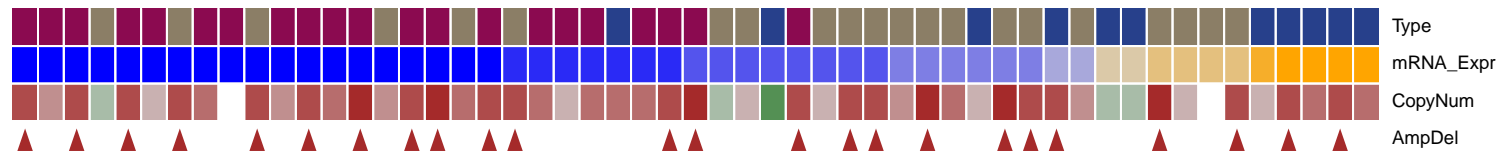

7: 131244901  
 7: 131243662  
 7: 131242962  
 7: 131242878  
 7: 131242787  
 7: 131241768  
 7: 131240531  
 7: 131240514  
 7: 131240440  
 7: 131233342  
 7: 131231657  
 7: 131229865  
 7: 131223417  
 7: 131221478  
 7: 131217668  
 7: 131206773  
 7: 131187711

GeneLoc  
 PromoterAssoc  
 CpGIsland

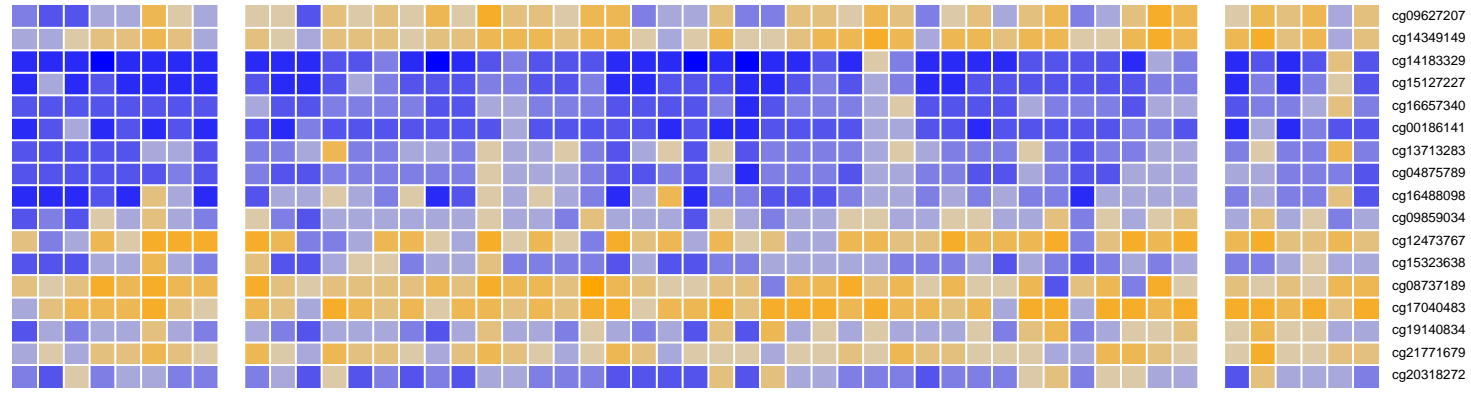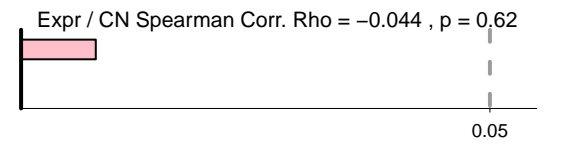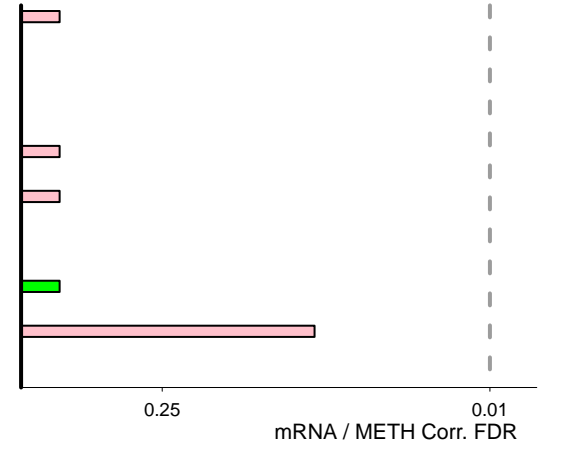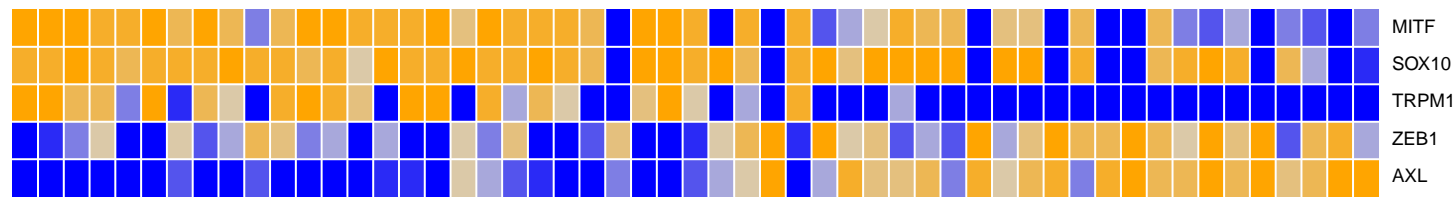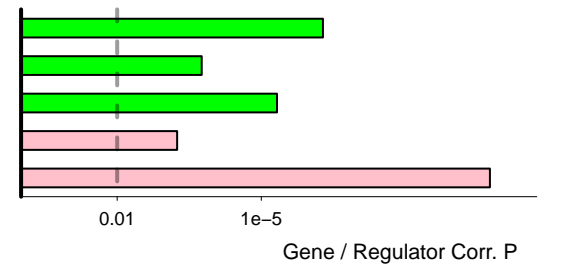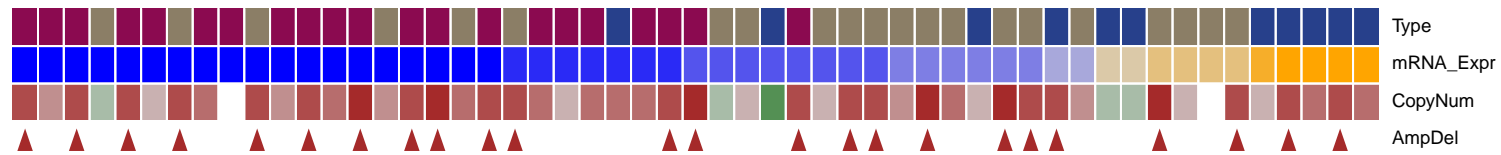

S2374  
 S2521  
 S2718  
 S2596  
 S2373  
 S2391  
 S2333  
 S2406  
 S2667  
 S2645  
 S2379  
 S2765  
 S2216  
 S2357  
 S2734  
 S2330  
 S2408  
 S2767  
 S2320  
 S2247  
 S2508  
 S2189  
 S2761  
 S2686  
 S2279  
 S2400  
 S2668  
 S2549  
 S2381  
 S2125  
 S2510  
 S2495  
 S2800  
 S2365  
 S2097  
 S2410  
 S2392  
 S2261  
 S2812  
 S2153  
 S2470  
 S2380  
 S2338  
 S2356  
 S2423  
 S2654  
 S2350  
 S2650  
 S2770A  
 S2405  
 S2583  
 S2688  
 S2731



# ARNTL2

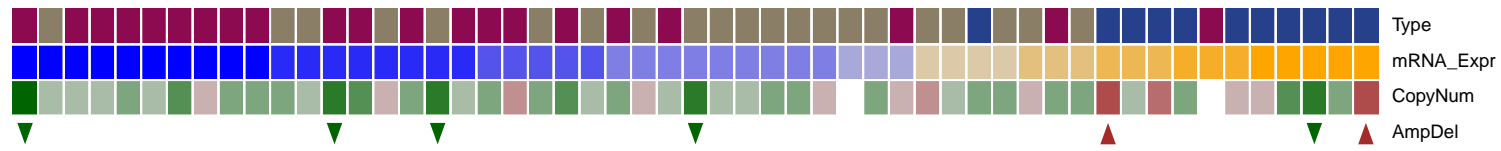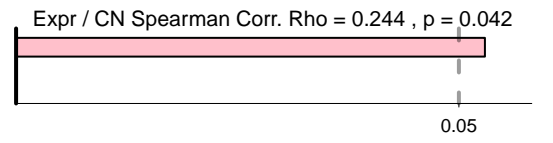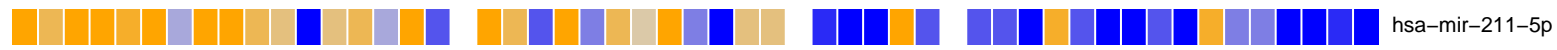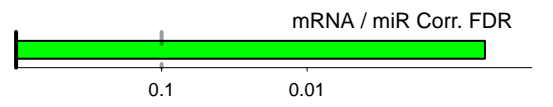

- 12 : 27484656
- 12 : 27485373
- 12 : 27485428
- 12 : 27485716
- 12 : 27486075
- 12 : 27486780
- 12 : 27500572
- 12 : 27509134
- 12 : 27534678
- 12 : 27536519

GeneLoc  
PromoterAssoc  
CpGIsland

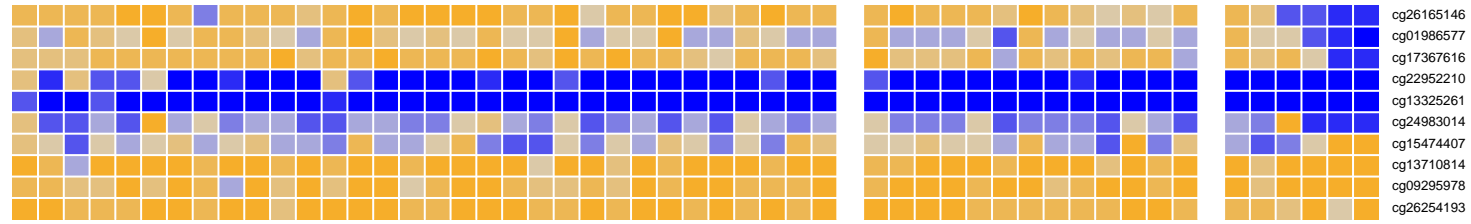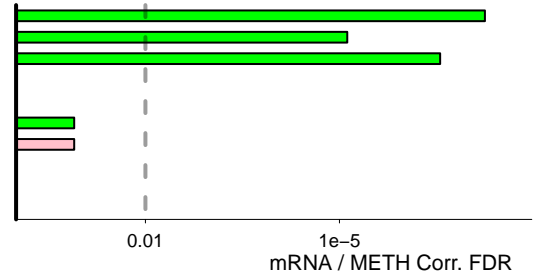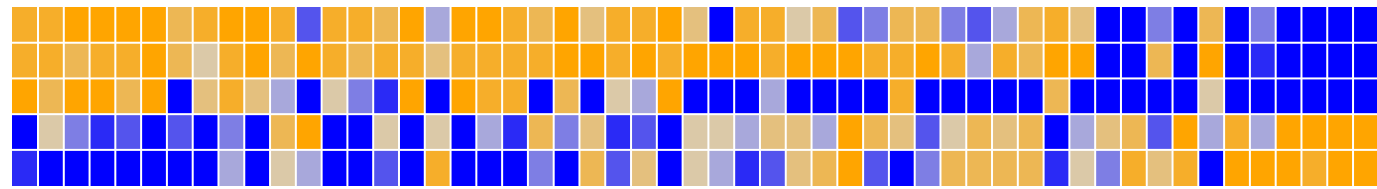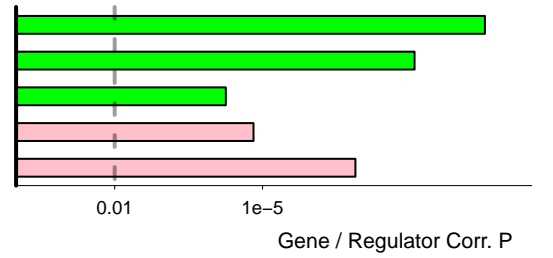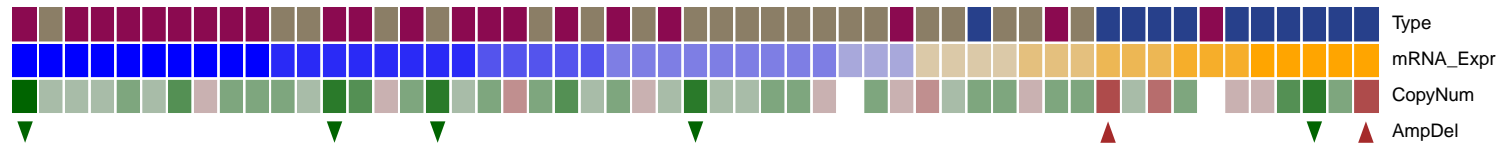

- S2330
- S2596
- S2765
- S2521
- S2406
- S2400
- S2761
- S2357
- S2320
- S2279
- S2381
- S2495
- S2189
- S2373
- S2333
- S2374
- S2800
- S2391
- S2216
- S2510
- S2380
- S2718
- S2153
- S2668
- S2097
- S2408
- S2767
- S2549
- S2734
- S2247
- S2365
- S2410
- S2350
- S2645
- S2379
- S2392
- S2654
- S2583
- S2650
- S2423
- S2508
- S2812
- S2686
- S2338
- S2405
- S2261
- S2667
- S2688
- S2731
- S2125
- S2470
- S2356
- S2770A

# GPR176

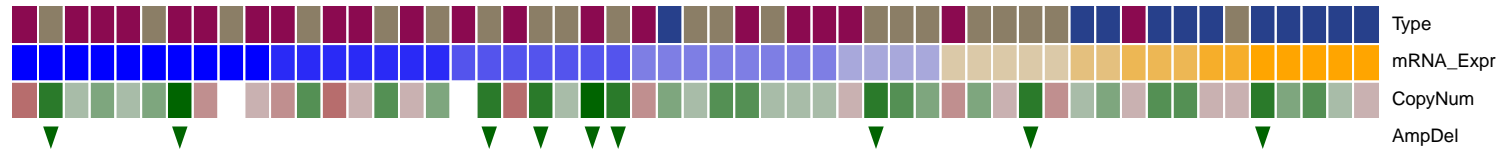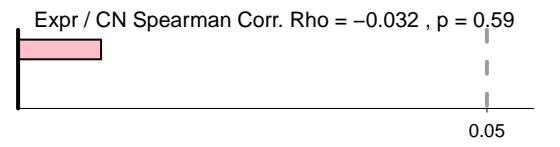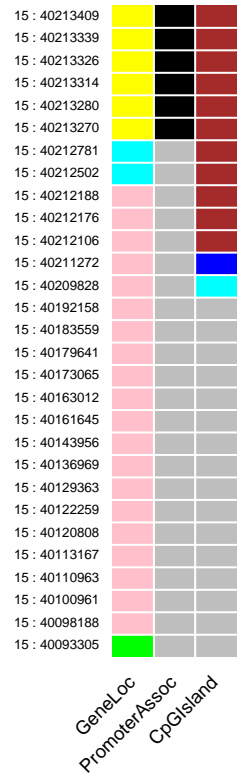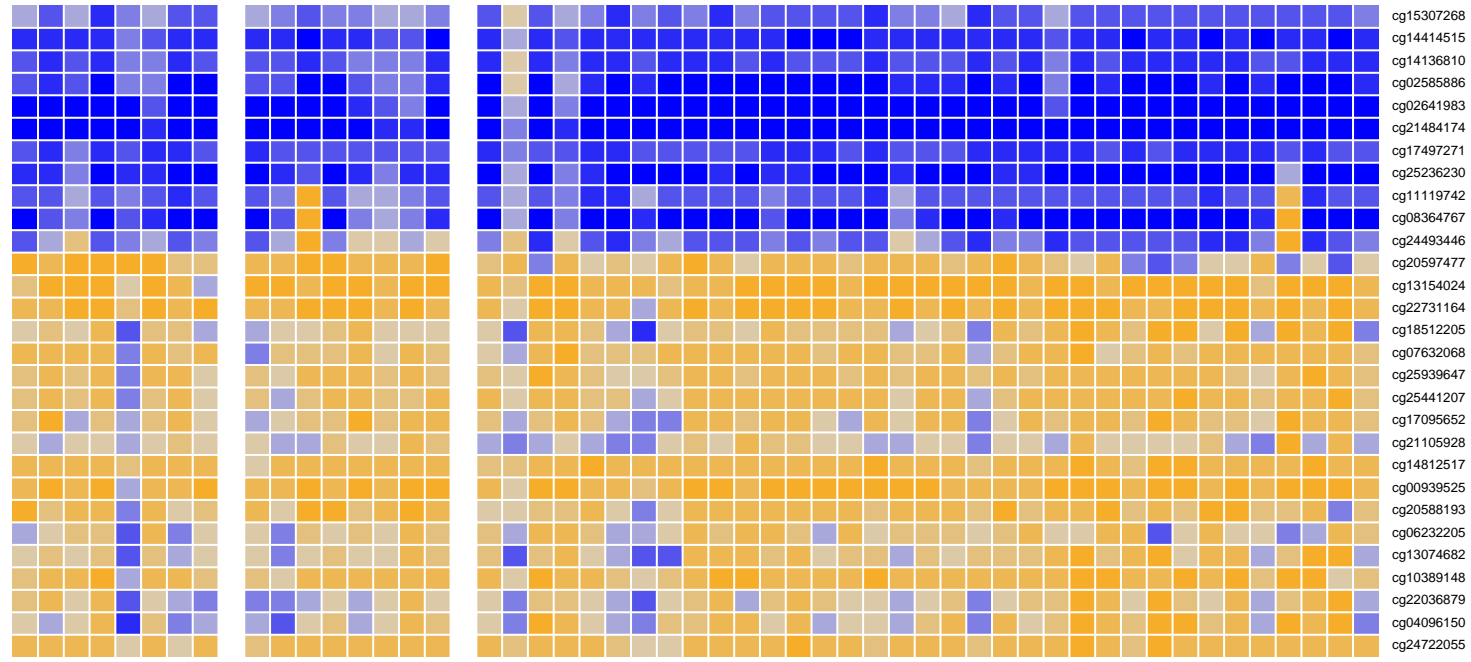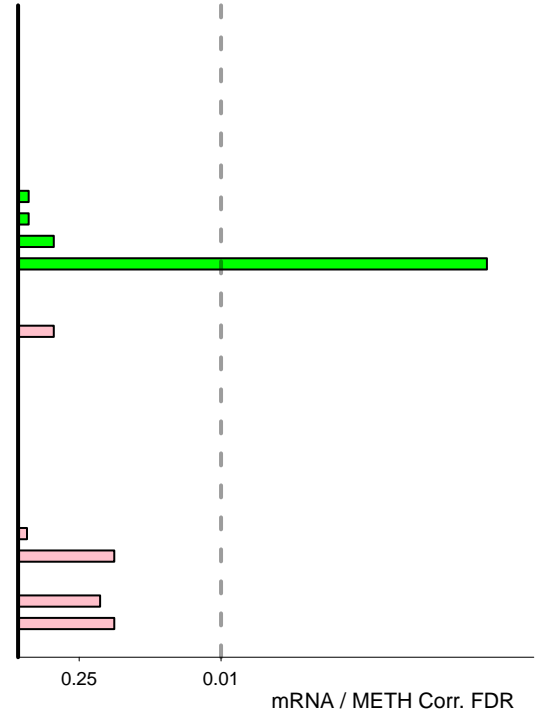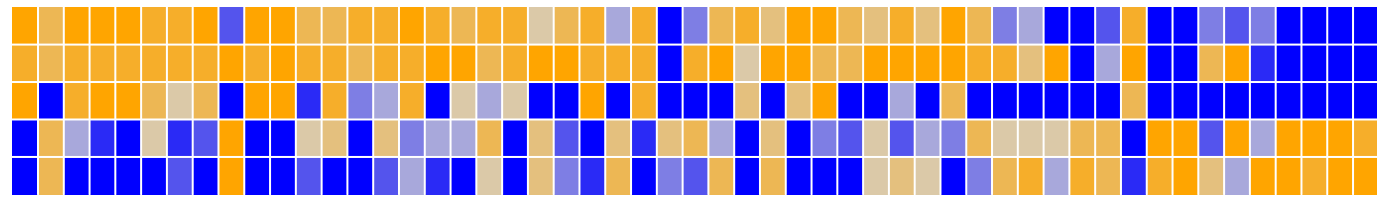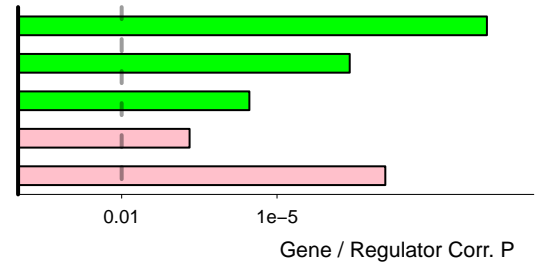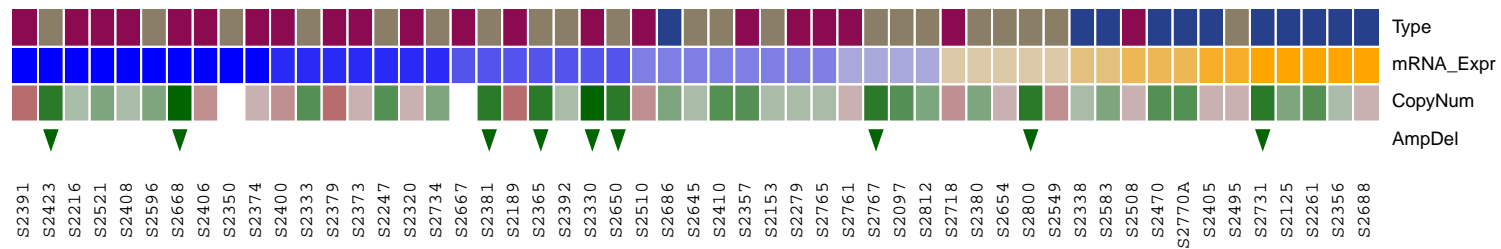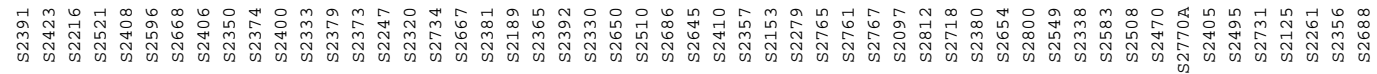

# FLNC

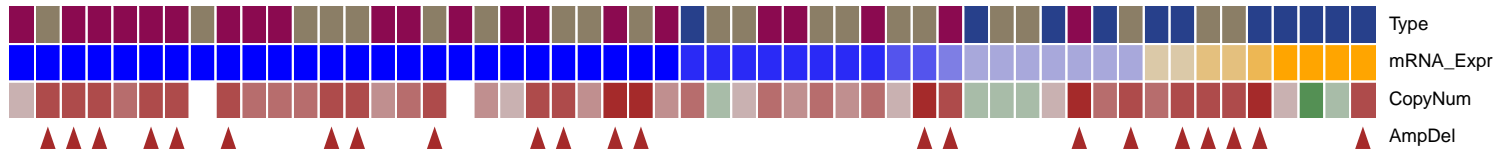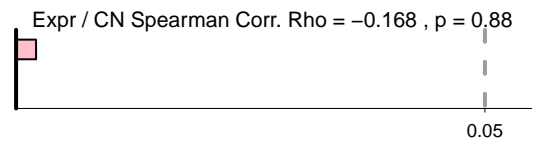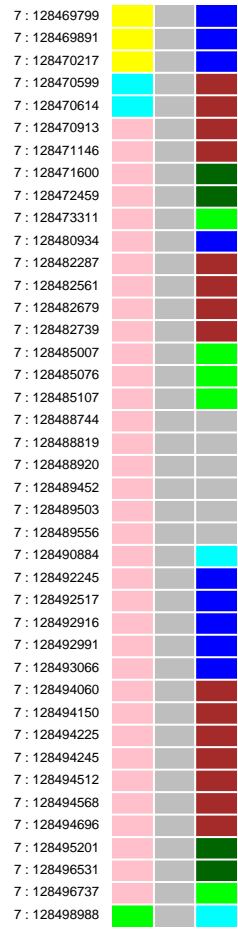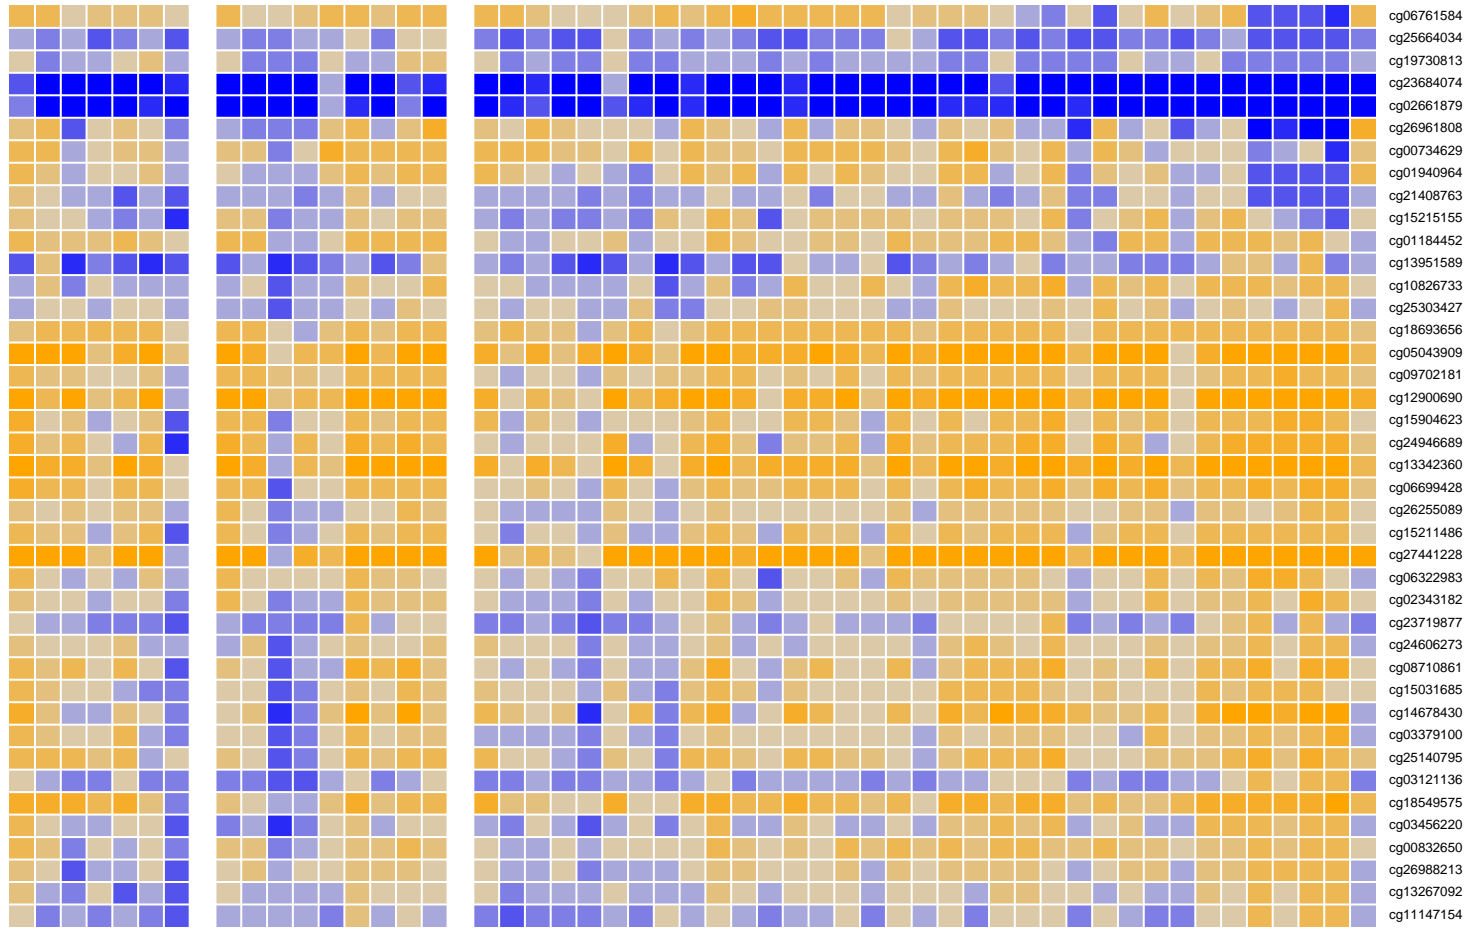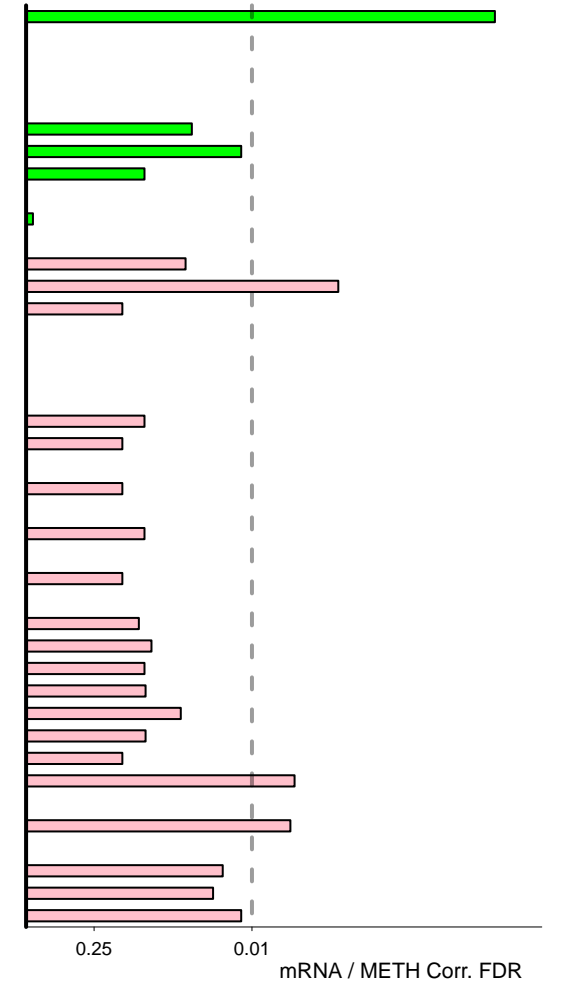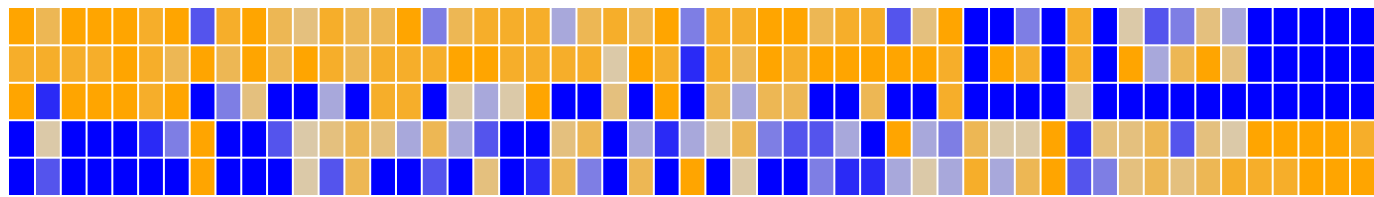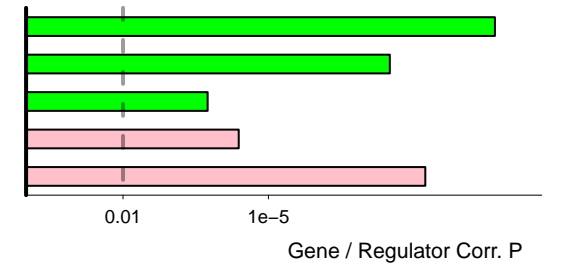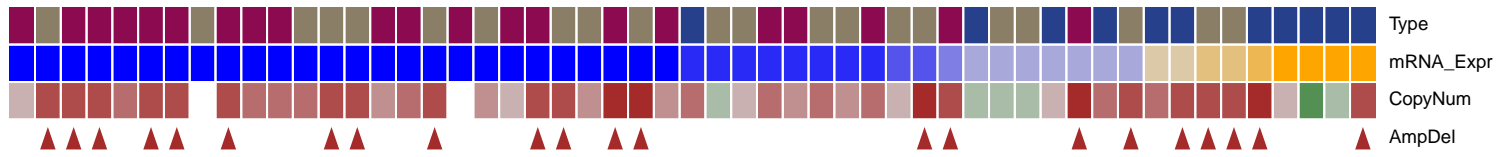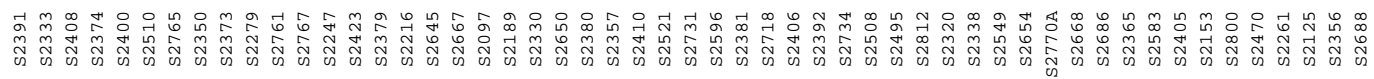

# COL8A1

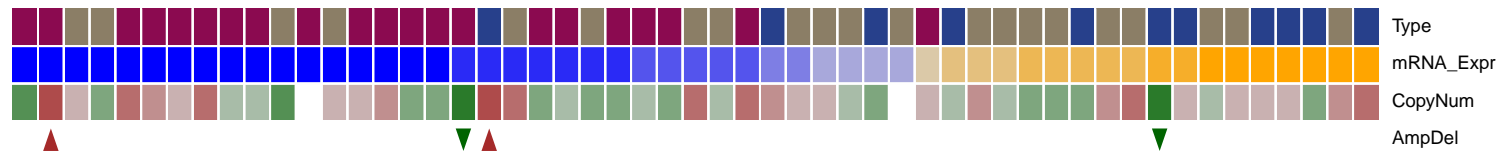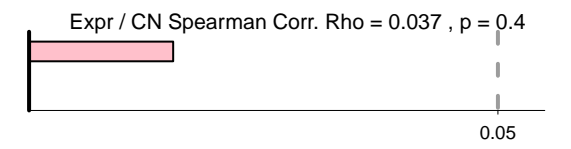

3 : 99356666  
 3 : 99356885  
 3 : 99357081  
 3 : 99357437  
 3 : 99357499  
 3 : 99357613  
 3 : 99364061  
 3 : 99371838  
 3 : 99378032  
 3 : 99397401  
 3 : 99408767  
 3 : 99425497  
 3 : 99440673  
 3 : 99462341  
 3 : 99463106  
 3 : 99484879  
 3 : 99507048  
 3 : 99513656

GeneLoc  
 PromoterAssoc  
 CpGIsland

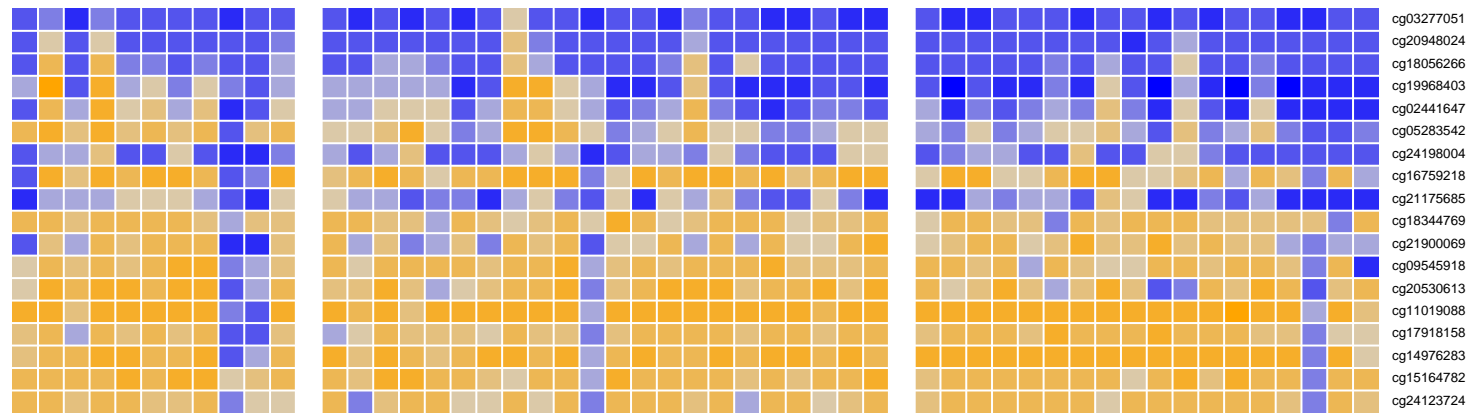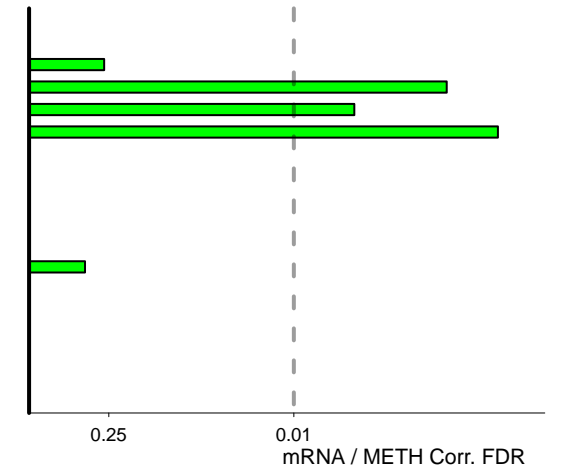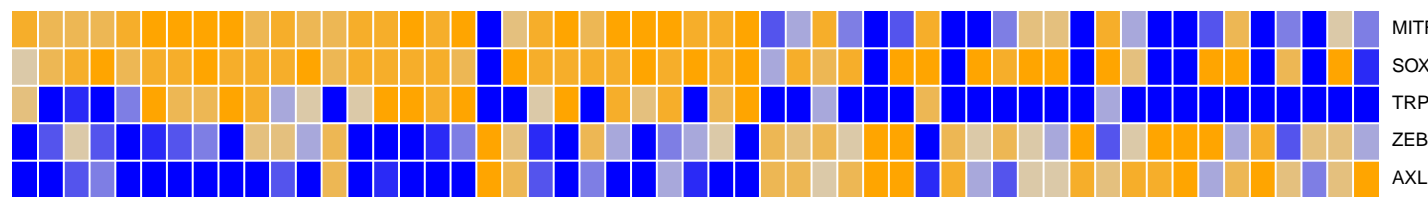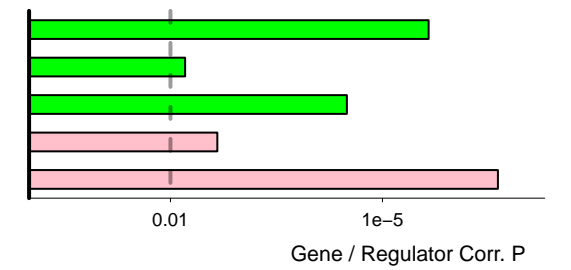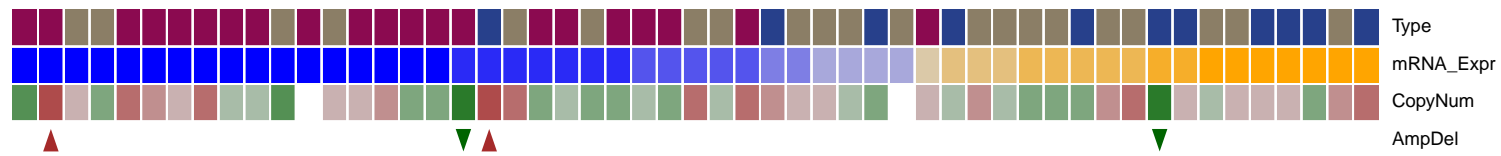

S2357  
 S2761  
 S2333  
 S2392  
 S2373  
 S2521  
 S2406  
 S2718  
 S2374  
 S2379  
 S2247  
 S2667  
 S2423  
 S2189  
 S2330  
 S2391  
 S2510  
 S2765  
 S2770A  
 S2153  
 S2668  
 S2408  
 S2380  
 S2216  
 S2279  
 S2320  
 S2734  
 S2596  
 S2400  
 S2583  
 S2650  
 S2381  
 S2654  
 S2356  
 S2350  
 S2508  
 S2338  
 S2549  
 S2645  
 S2767  
 S2812  
 S2097  
 S2800  
 S2470  
 S2125  
 S2495  
 S2410  
 S2688  
 S2405  
 S2686  
 S2365  
 S2731

# CAV1

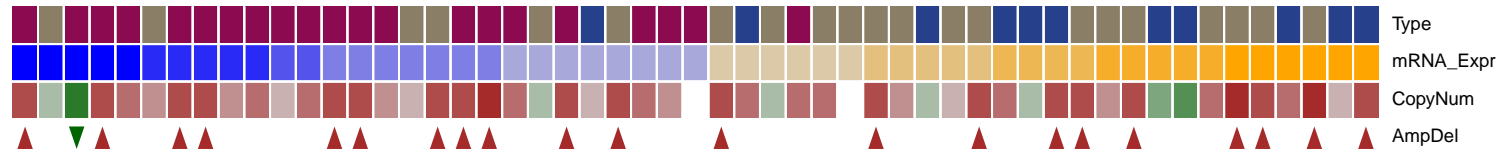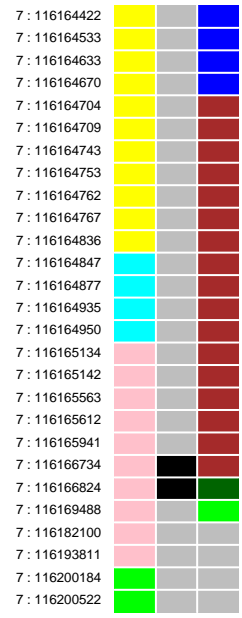

GeneLoc  
PromoterAssoc  
CpGIsland

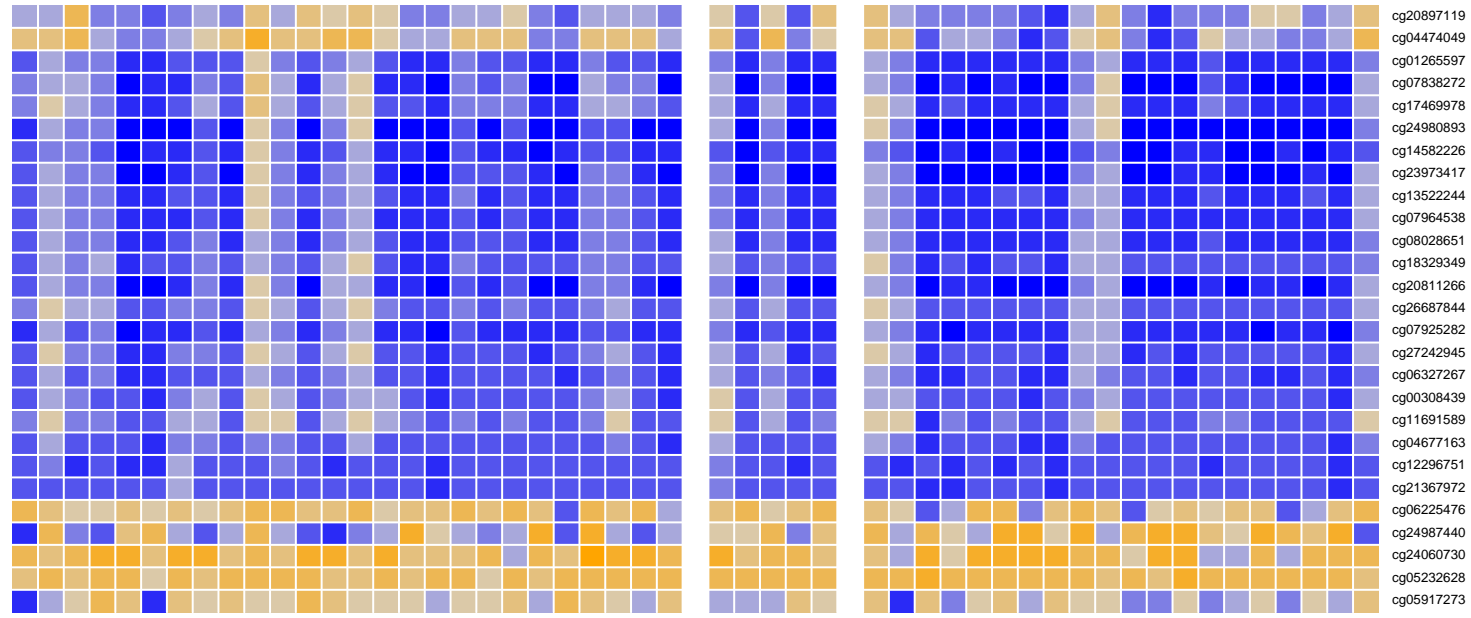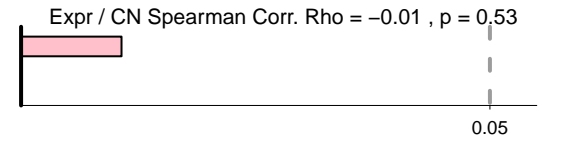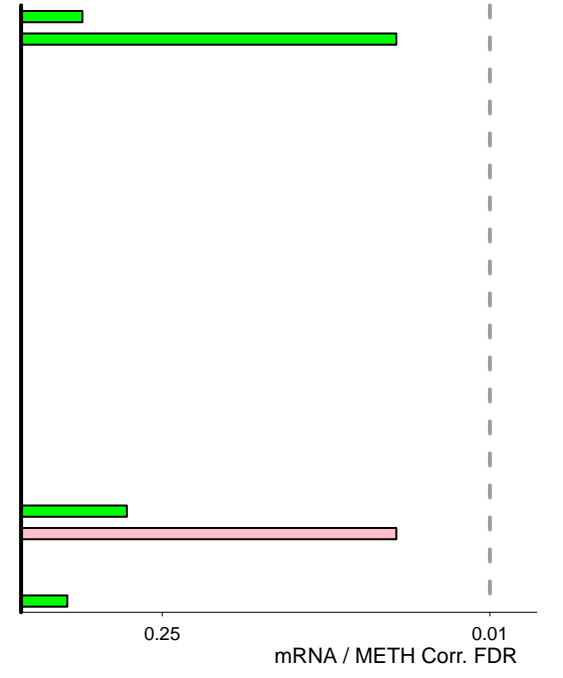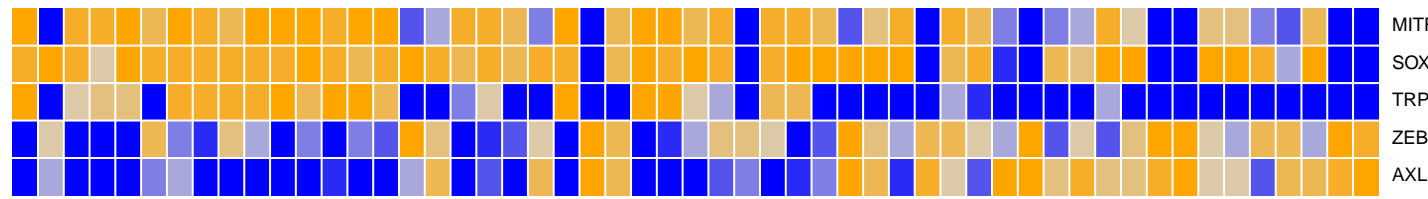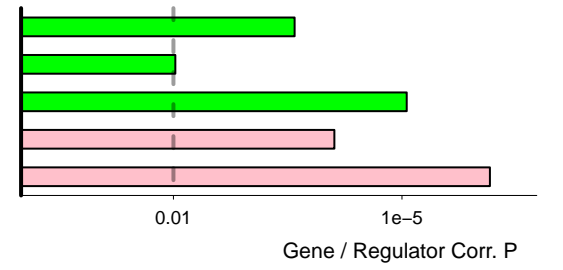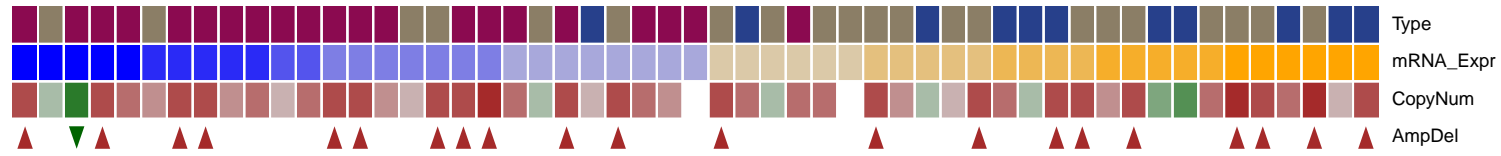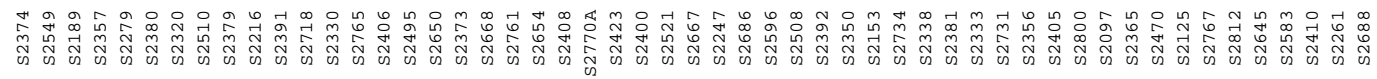

# AOX1

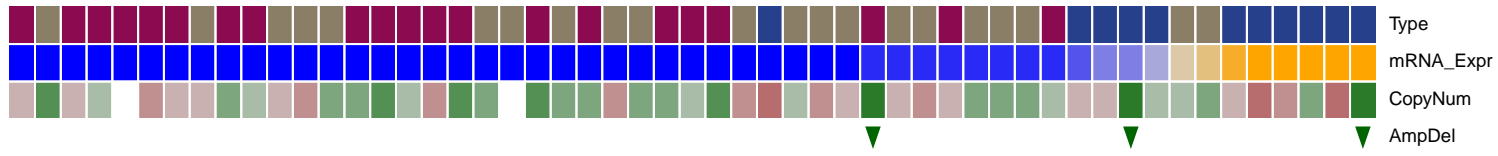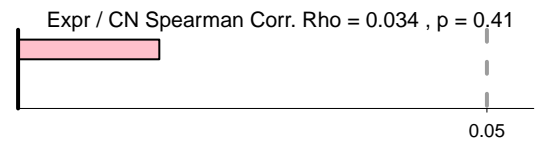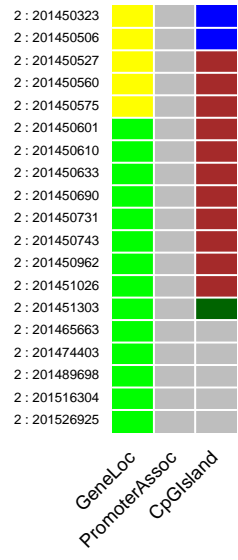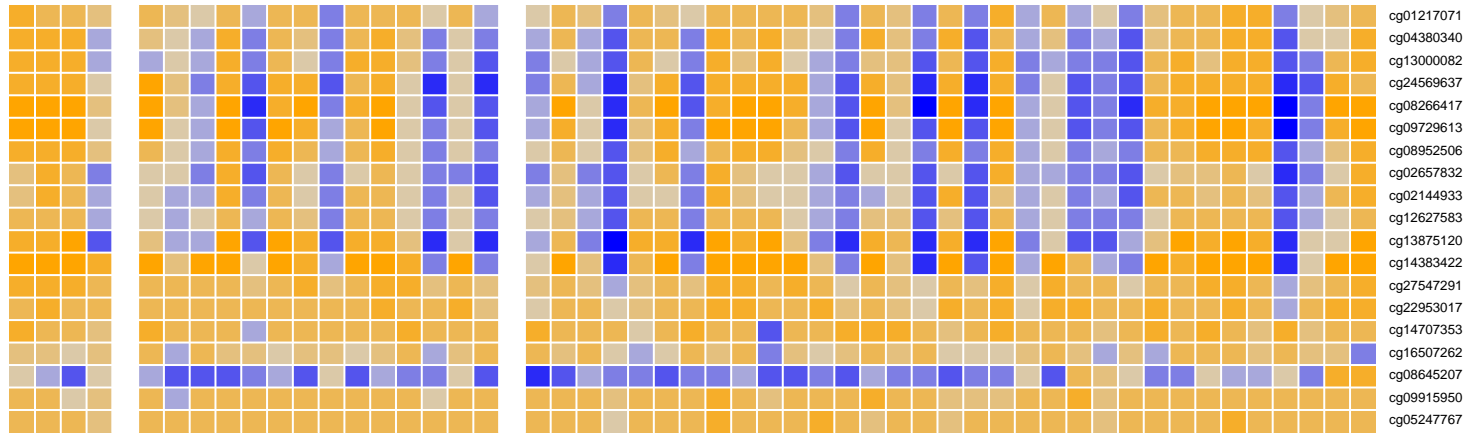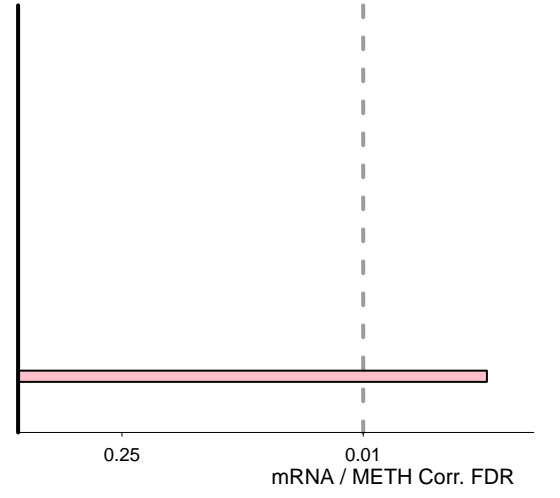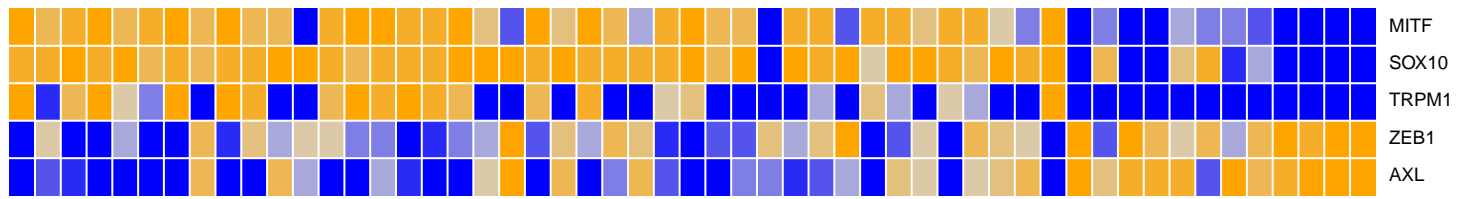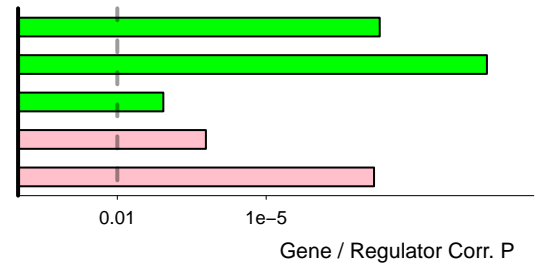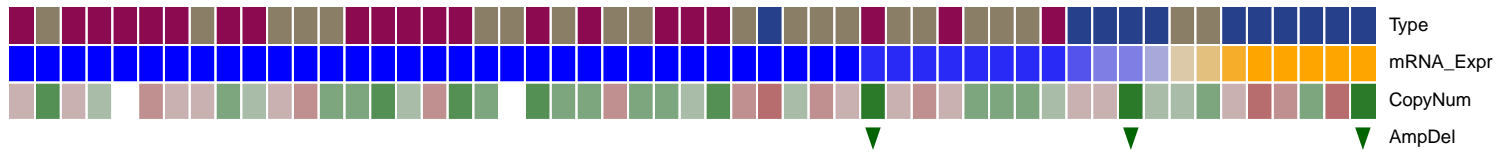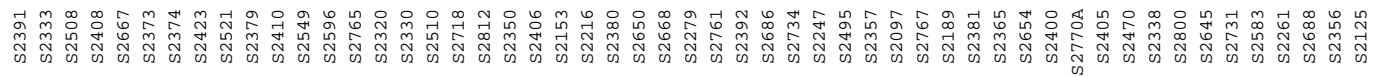

# PTGFR

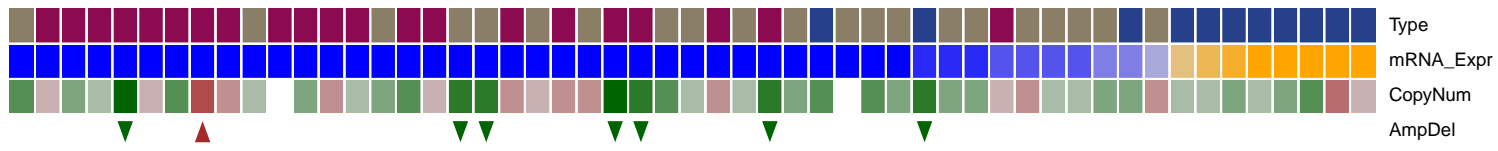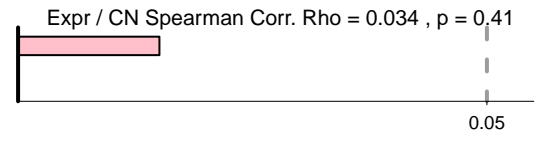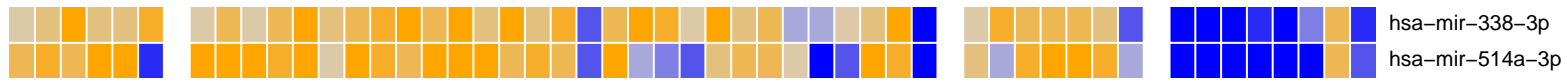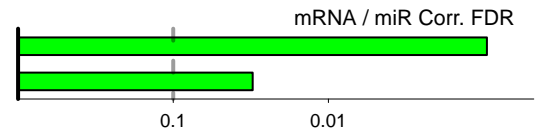

1 : 78805320  
1 : 78892408  
1 : 78956268  
1 : 78956458  
1 : 78956570  
1 : 78956845  
1 : 78956847  
1 : 78956905  
1 : 78957203  
1 : 78957253  
1 : 78957515  
1 : 78957682  
1 : 78960610

GeneLoc  
PromoterAssoc  
CpGIsland

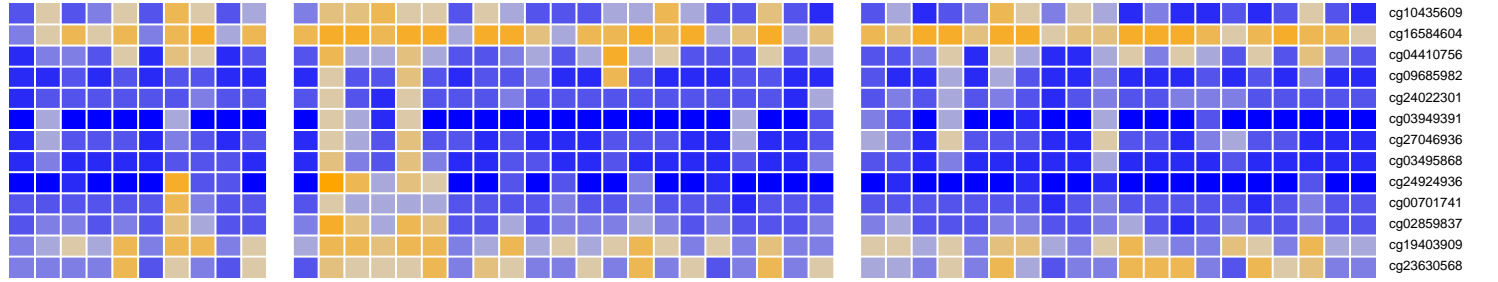

cg10435609  
cg16584604  
cg04410756  
cg09685982  
cg24022301  
cg03949391  
cg27046936  
cg03495868  
cg24924936  
cg00701741  
cg02859837  
cg19403909  
cg23630568

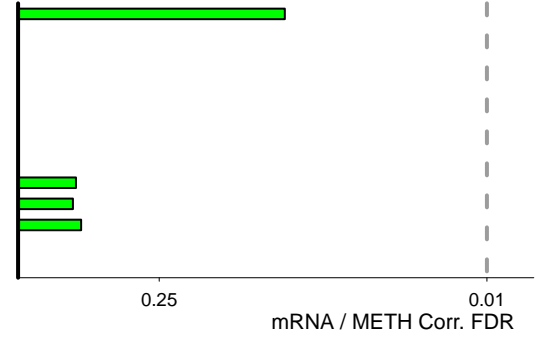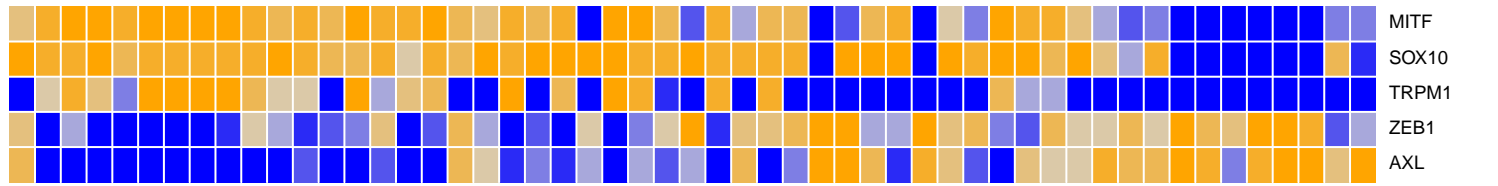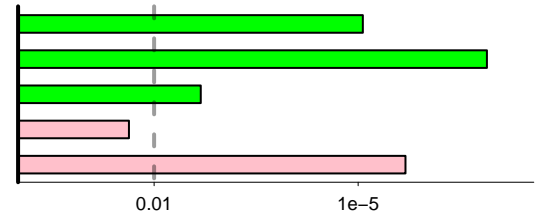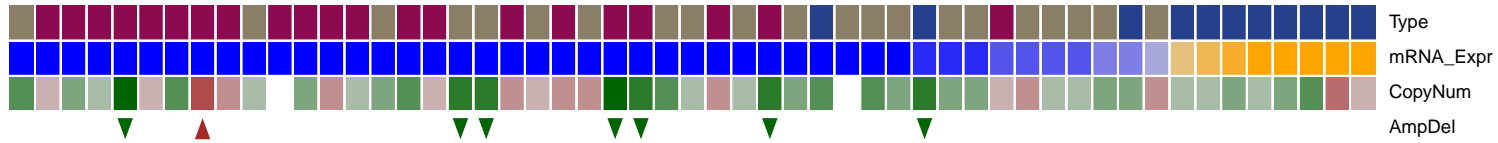

S2153  
S2189  
S2216  
S2279  
S2373  
S2374  
S2391  
S2408  
S2521  
S2596  
S2667  
S2668  
S2761  
S2765  
S2247  
S2357  
S2406  
S2423  
S2812  
S2330  
S2392  
S2508  
S2549  
S2400  
S2320  
S2333  
S2495  
S2510  
S2650  
S2379  
S2380  
S2770A  
S2350  
S2410  
S2734  
S2470  
S2365  
S2645  
S2718  
S2097  
S2381  
S2767  
S2800  
S2583  
S2654  
S2356  
S2338  
S2686  
S2261  
S2125  
S2688  
S2405  
S2731

Type  
mRNA\_Expr  
CopyNum  
AmpDel

# ALPK2

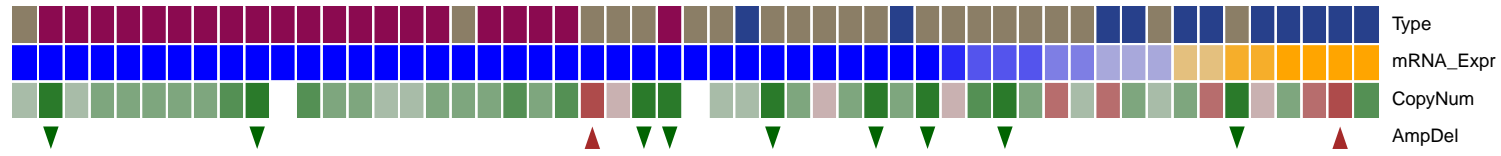

18 : 56296607  
 18 : 56296544  
 18 : 56296496  
 18 : 56296449  
 18 : 56296354  
 18 : 56296243  
 18 : 56296094  
 18 : 56279934  
 18 : 56246997  
 18 : 56148617

GeneLoc  
 PromoterAssoc  
 CpGIsland

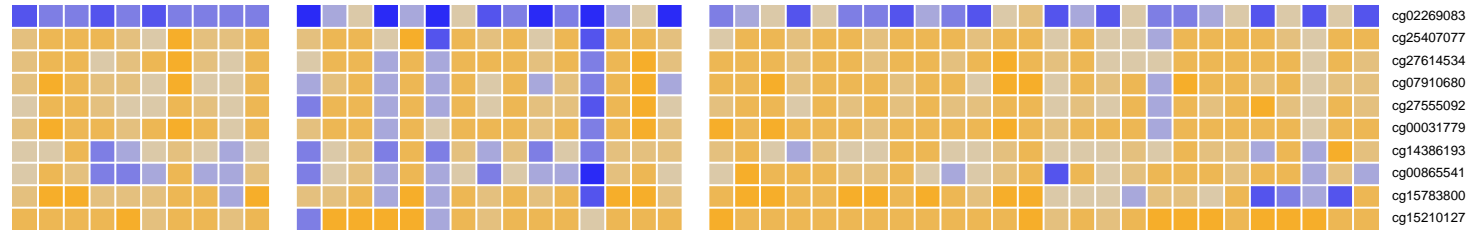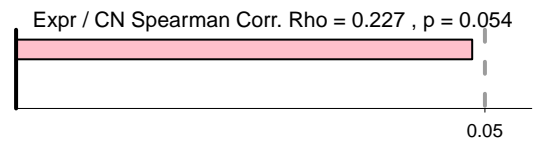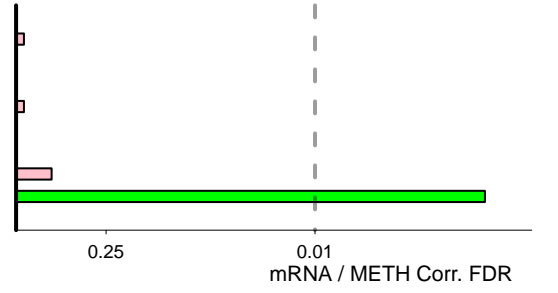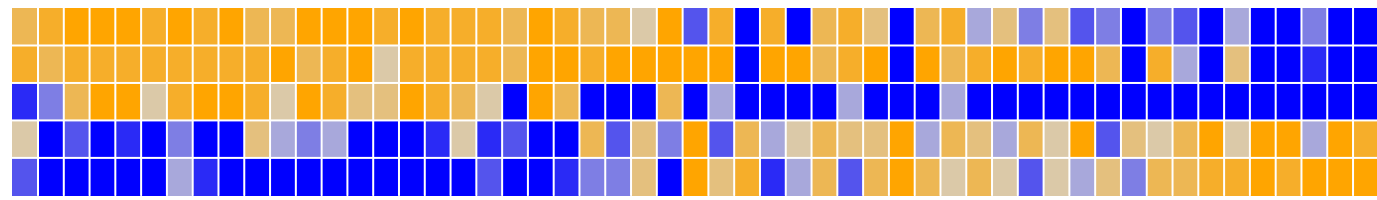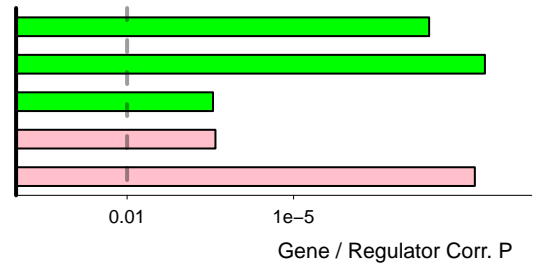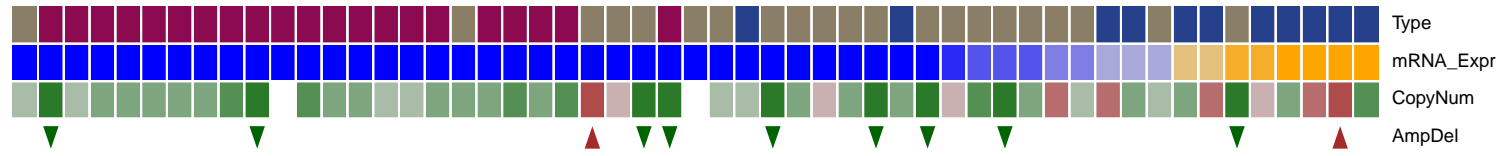

S2333  
 S2373  
 S2406  
 S2408  
 S2521  
 S2189  
 S2320  
 S2330  
 S2374  
 S2379  
 S2667  
 S2765  
 S2216  
 S2279  
 S2357  
 S2391  
 S2510  
 S2596  
 S2668  
 S2761  
 S2400  
 S2508  
 S2380  
 S2392  
 S2365  
 S2718  
 S2350  
 S2097  
 S2338  
 S2734  
 S2549  
 S2423  
 S2247  
 S2153  
 S2356  
 S2410  
 S2381  
 S2650  
 S2812  
 S2645  
 S2767  
 S2495  
 S2405  
 S2686  
 S2654  
 S2583  
 S2261  
 S2800  
 S2770A  
 S2470  
 S2731  
 S2125  
 S2688



# CFH

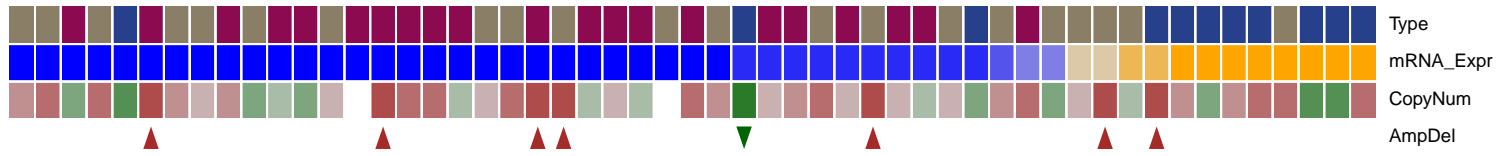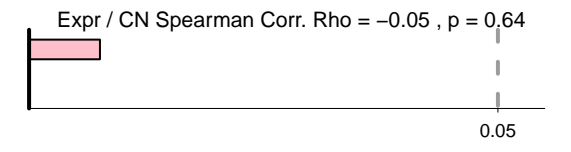

1 : 196619631  
 1 : 196619732  
 1 : 196620428  
 1 : 196620963  
 1 : 196624484  
 1 : 196702931

GeneLoc  
 PromoterAssoc  
 CpGIsland

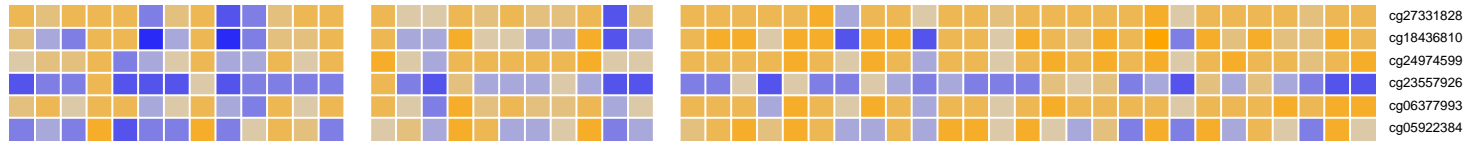

cg27331828  
 cg18436810  
 cg24974599  
 cg23557926  
 cg06377993  
 cg05922384

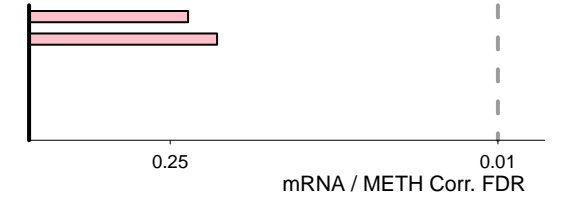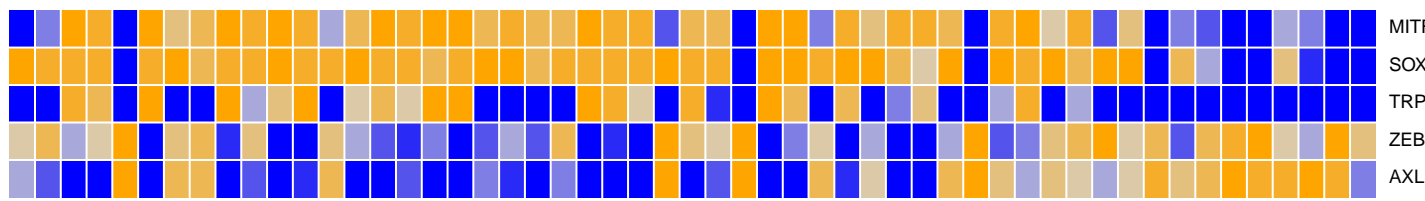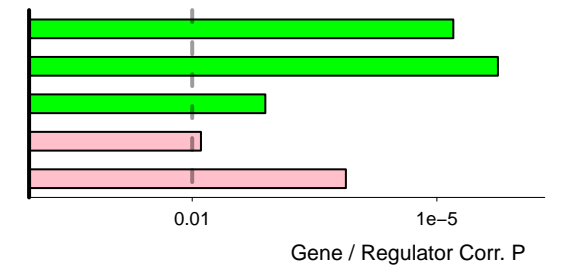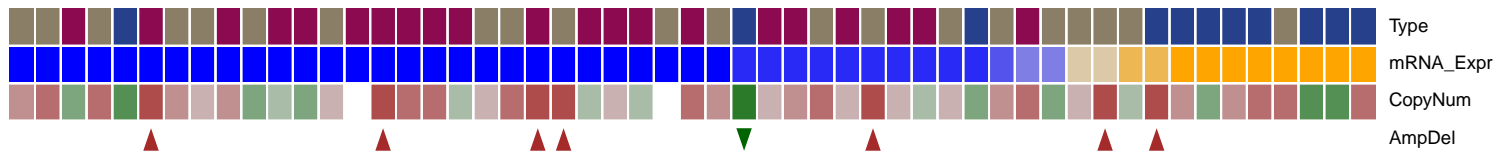

S2549  
 S2645  
 S2216  
 S2596  
 S2770A  
 S2374  
 S2153  
 S2423  
 S2521  
 S2247  
 S2279  
 S2330  
 S2650  
 S2667  
 S2406  
 S2668  
 S2765  
 S2391  
 S2392  
 S2734  
 S2761  
 S2380  
 S2408  
 S2510  
 S2189  
 S2350  
 S2379  
 S2333  
 S2125  
 S2400  
 S2718  
 S2654  
 S2508  
 S2812  
 S2373  
 S2357  
 S2410  
 S2356  
 S2097  
 S2320  
 S2365  
 S2381  
 S2495  
 S2767  
 S2338  
 S2405  
 S2583  
 S2688  
 S2261  
 S2800  
 S2731  
 S2470  
 S2686

Type  
 mRNA\_Expr  
 CopyNum  
 AmpDel

# LPAR1

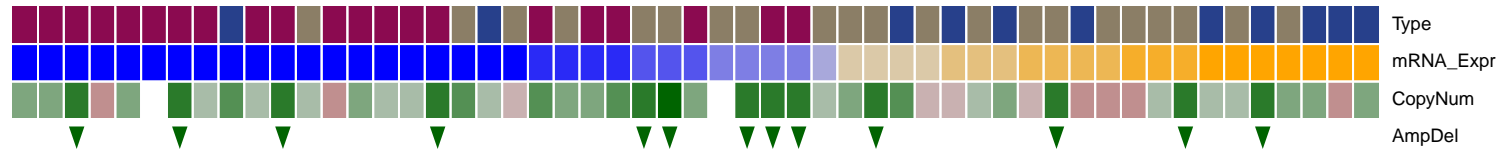

9:113802005  
9:113801337  
9:113801320  
9:113800909  
9:113800279  
9:113799936  
9:113799879  
9:113792896  
9:113785563  
9:113778640  
9:113733131  
9:113714986  
9:113704153  
9:113698814  
9:113658492  
9:113636148

GeneLoc  
PromoterAssoc  
CpGIsland

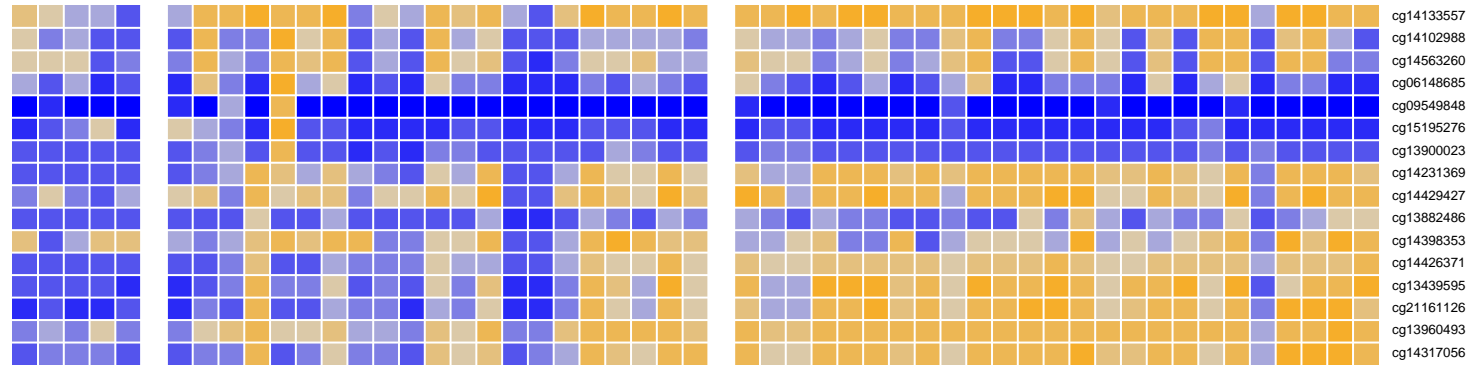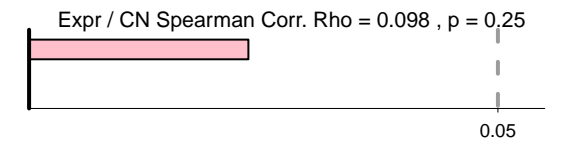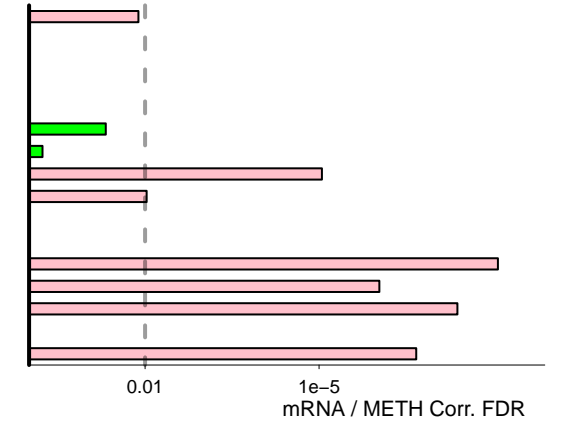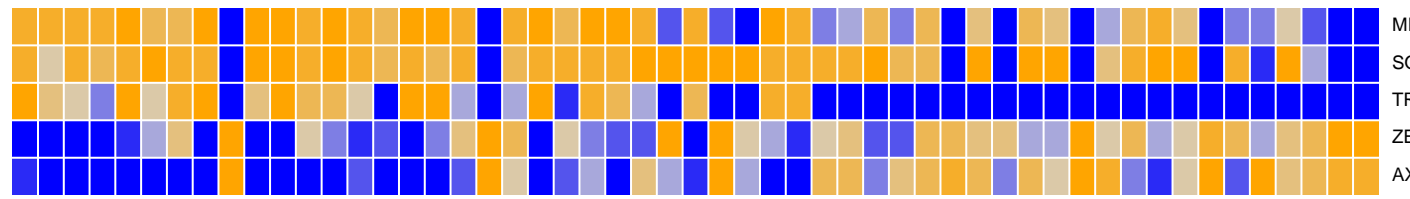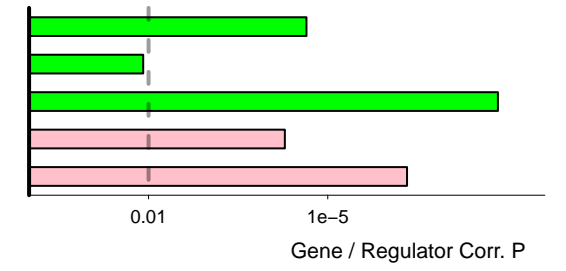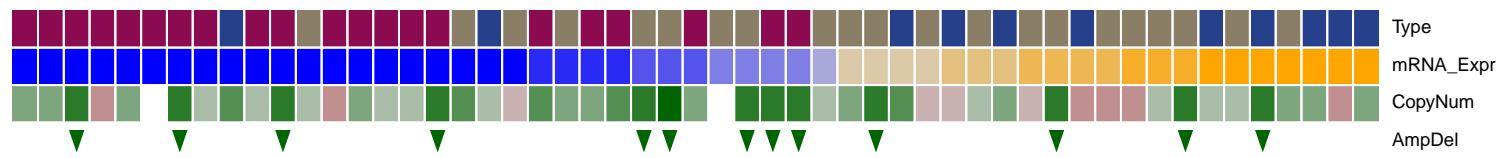

S2330  
S2357  
S2189  
S2373  
S2521  
S2667  
S2379  
S2391  
S2770A  
S2279  
S2400  
S2596  
S2718  
S2668  
S2761  
S2408  
S2765  
S2247  
S2356  
S2381  
S2374  
S2333  
S2320  
S2406  
S2097  
S2495  
S2508  
S2350  
S2549  
S2216  
S2510  
S2654  
S2650  
S2392  
S2405  
S2423  
S2338  
S2153  
S2686  
S2410  
S2812  
S2125  
S2800  
S2380  
S2734  
S2767  
S2688  
S2645  
S2731  
S2365  
S2583  
S2470  
S2261

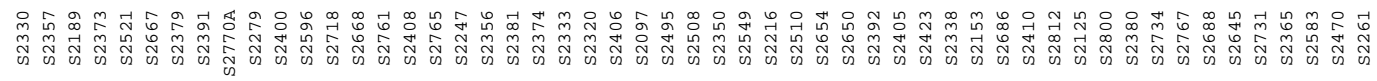

# F3

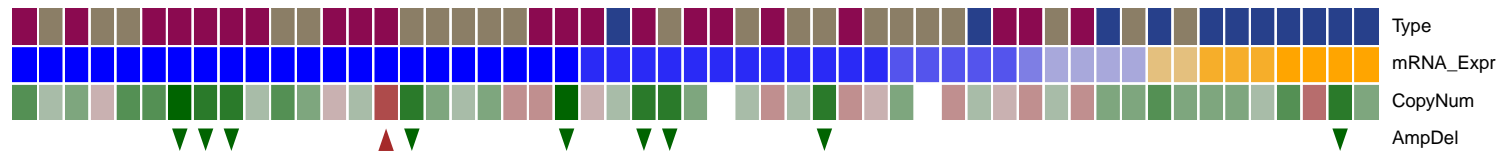

1: 95008117  
 1: 95008050  
 1: 95008041  
 1: 95006977  
 1: 95006838  
 1: 95006729  
 1: 95006539  
 1: 95006451  
 1: 95006322  
 1: 95003968  
 1: 94995935

GeneLoc  
 PromoterAssoc  
 CpGIsland

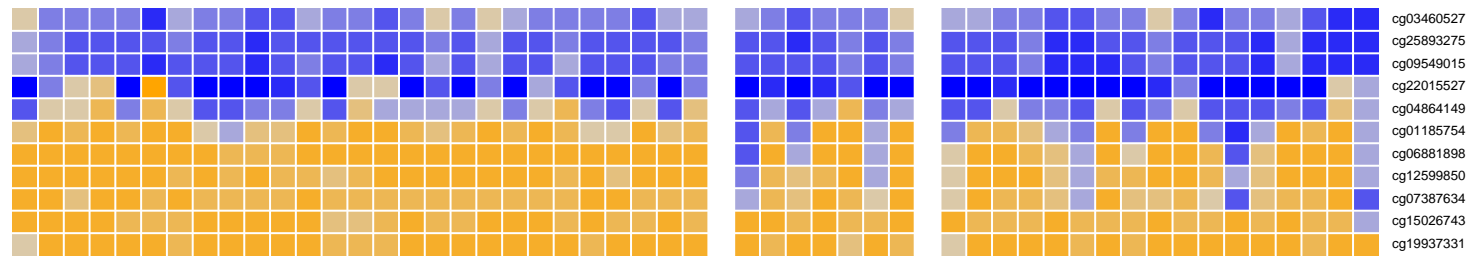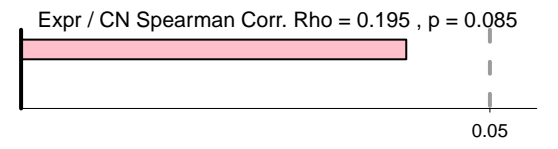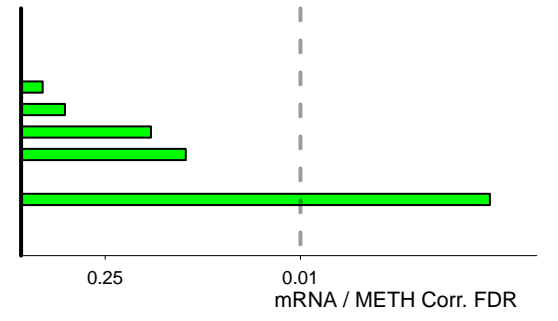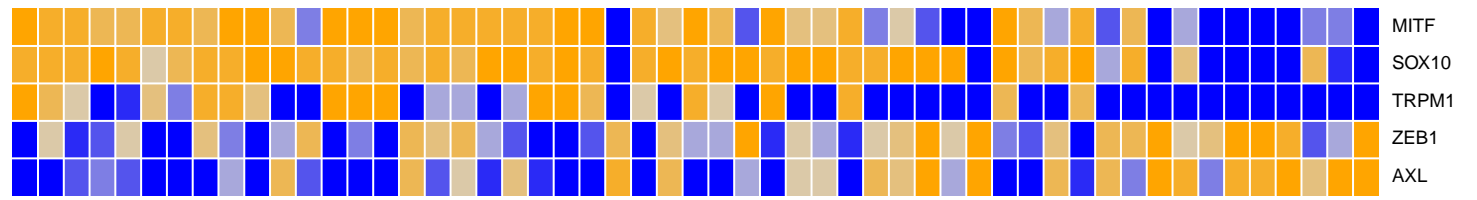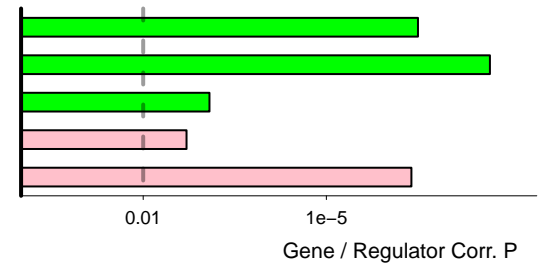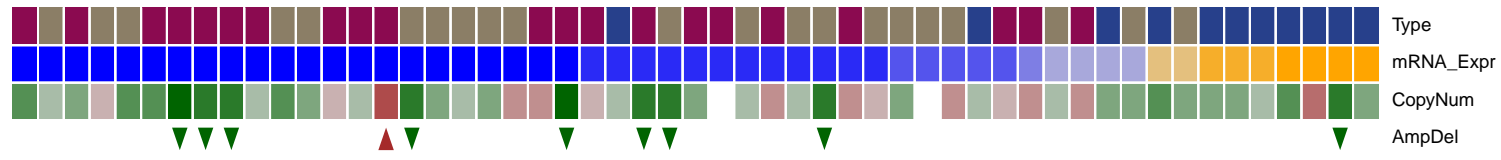

S2391  
 S2596  
 S2668  
 S2392  
 S2333  
 S2357  
 S2373  
 S2379  
 S2320  
 S2279  
 S2410  
 S2645  
 S2374  
 S2765  
 S2408  
 S2423  
 S2247  
 S2381  
 S2734  
 S2097  
 S2330  
 S2400  
 S2406  
 S2338  
 S2189  
 S2153  
 S2216  
 S2667  
 S2495  
 S2521  
 S2767  
 S2812  
 S2510  
 S2654  
 S2365  
 S2350  
 S2549  
 S2356  
 S2718  
 S2761  
 S2650  
 S2508  
 S2583  
 S2380  
 S2770A  
 S2800  
 S2686  
 S2470  
 S2261  
 S2688  
 S2405  
 S2731  
 S2125

# CNN2

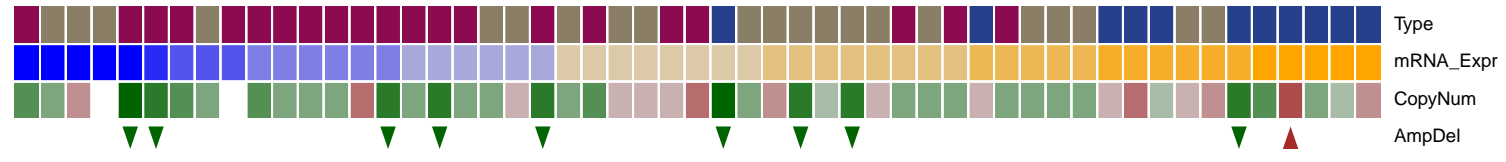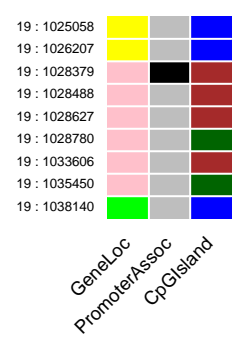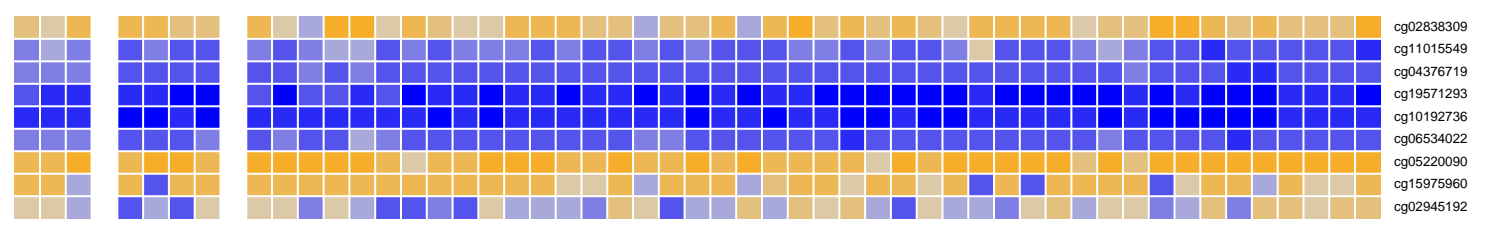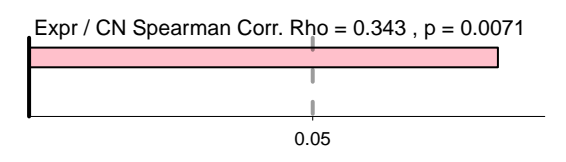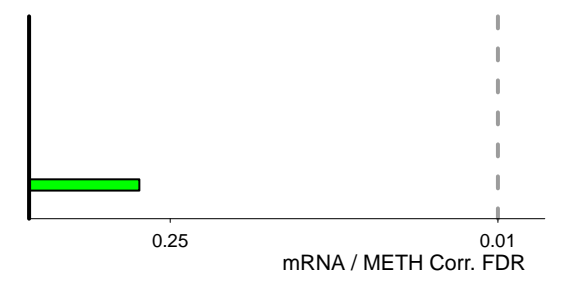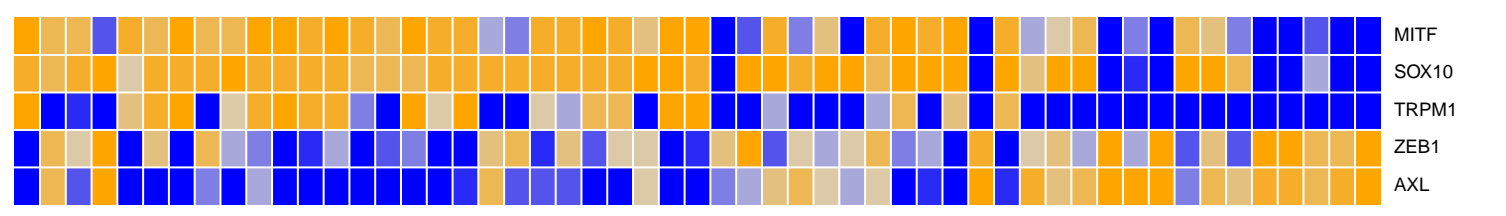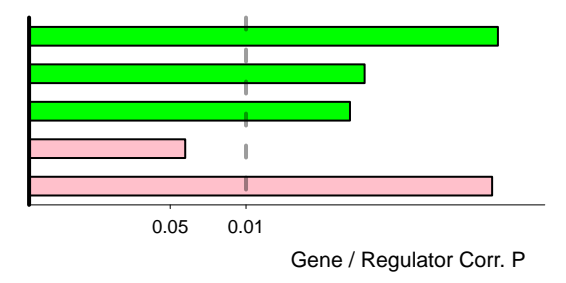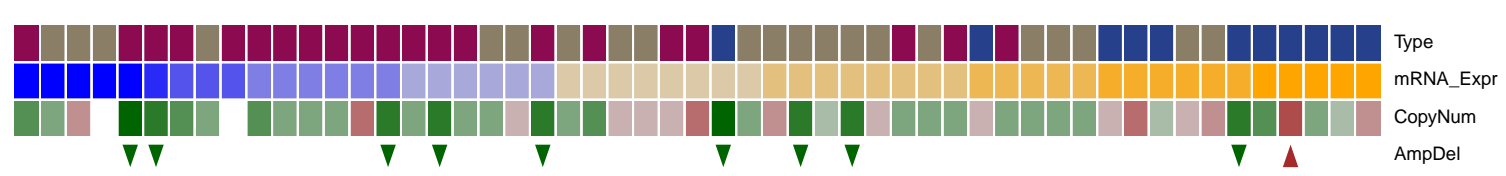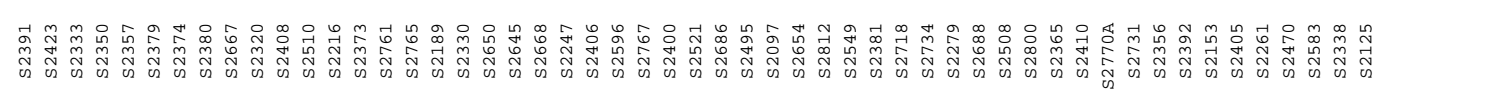

# MAP1B

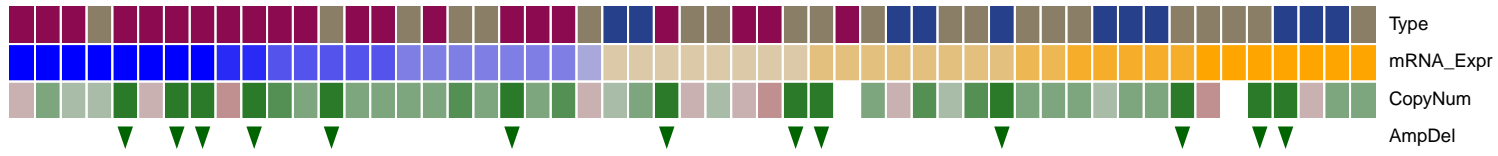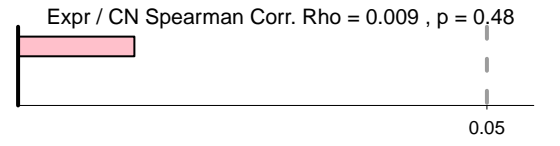

5 : 71402031  
 5 : 71402893  
 5 : 71403045  
 5 : 71403058  
 5 : 71403320  
 5 : 71403420  
 5 : 71403804  
 5 : 71404742  
 5 : 71407465  
 5 : 71418531  
 5 : 71428303  
 5 : 71429185  
 5 : 71441596  
 5 : 71447818  
 5 : 71452580  
 5 : 71455811  
 5 : 71462729  
 5 : 71475111  
 5 : 71475303  
 5 : 71475356  
 5 : 71503901

GeneLoc  
 PromoterAssoc  
 CpGIsland

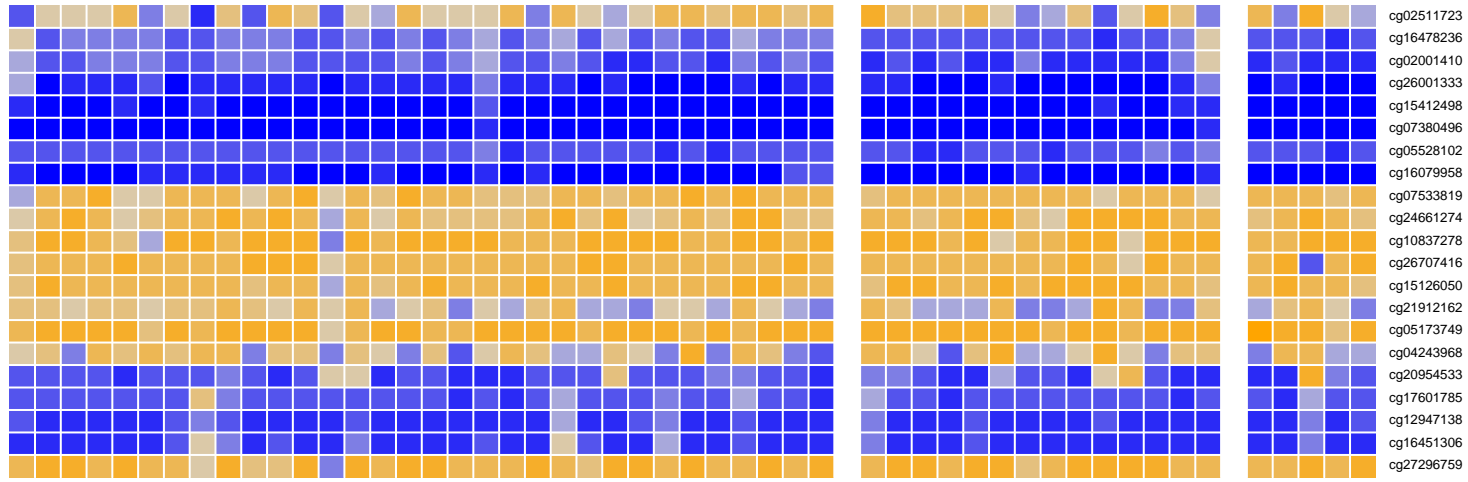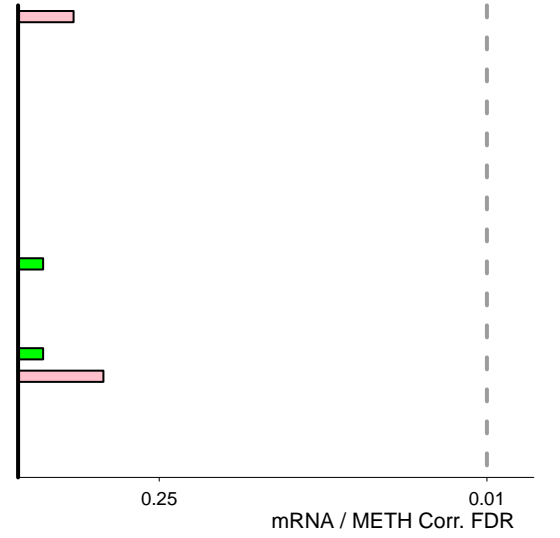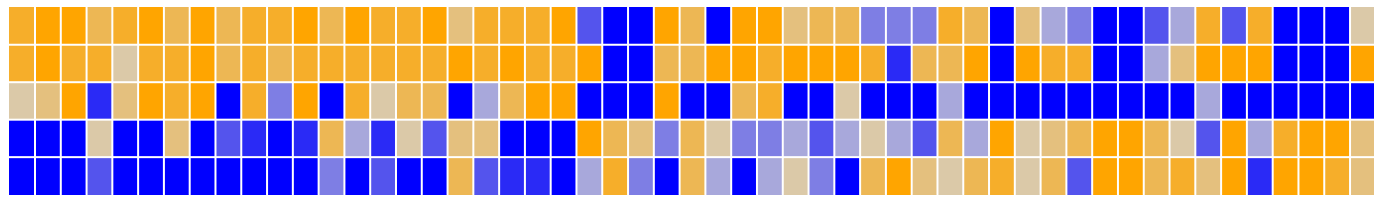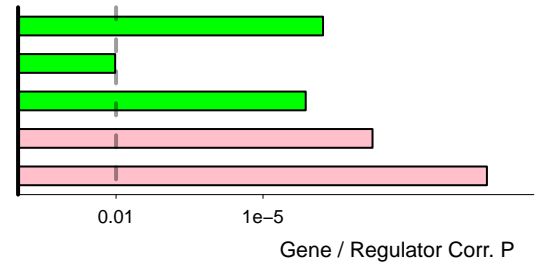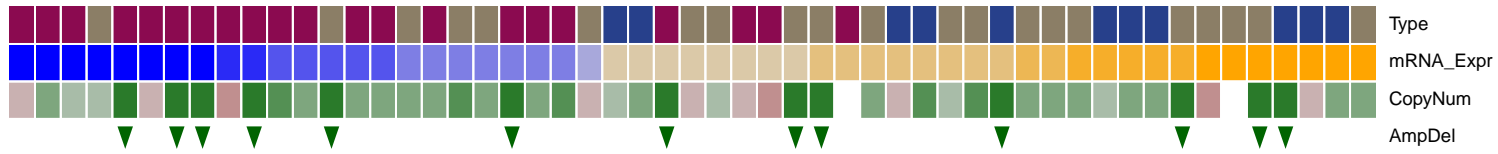

S2189  
 S2279  
 S2408  
 S2333  
 S2357  
 S2374  
 S2379  
 S2400  
 S2761  
 S2510  
 S2373  
 S2521  
 S2380  
 S2216  
 S2668  
 S2596  
 S2406  
 S2153  
 S2247  
 S2508  
 S2330  
 S2391  
 S2495  
 S2338  
 S2686  
 S2765  
 S2423  
 S2549  
 S2718  
 S2320  
 S2812  
 S2392  
 S2667  
 S2654  
 S2731  
 S2405  
 S2381  
 S2410  
 S2470  
 S2767  
 S2650  
 S2645  
 S2125  
 S2356  
 S2583  
 S2800  
 S2097  
 S2350  
 S2734  
 S2688  
 S2770A  
 S2261  
 S2365

# ITGB1

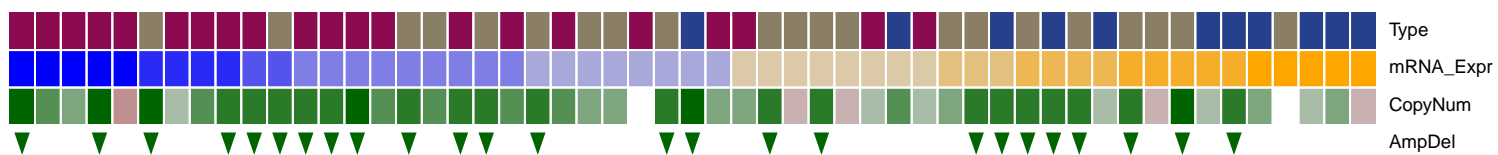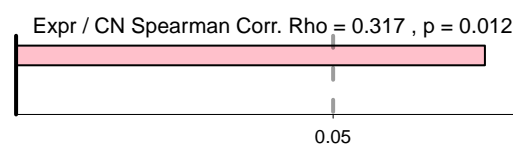

- 10 : 33294777
- 10 : 33294750
- 10 : 33294676
- 10 : 33294599
- 10 : 33294358
- 10 : 33270717
- 10 : 33269778
- 10 : 33269695
- 10 : 33269612
- 10 : 33269417
- 10 : 33265718
- 10 : 33260748
- 10 : 33244887
- 10 : 33244211
- 10 : 33232548
- 10 : 33230686
- 10 : 33227909
- 10 : 33224744
- 10 : 33212865

GeneLoc  
PromoterAssoc  
CpGIsland

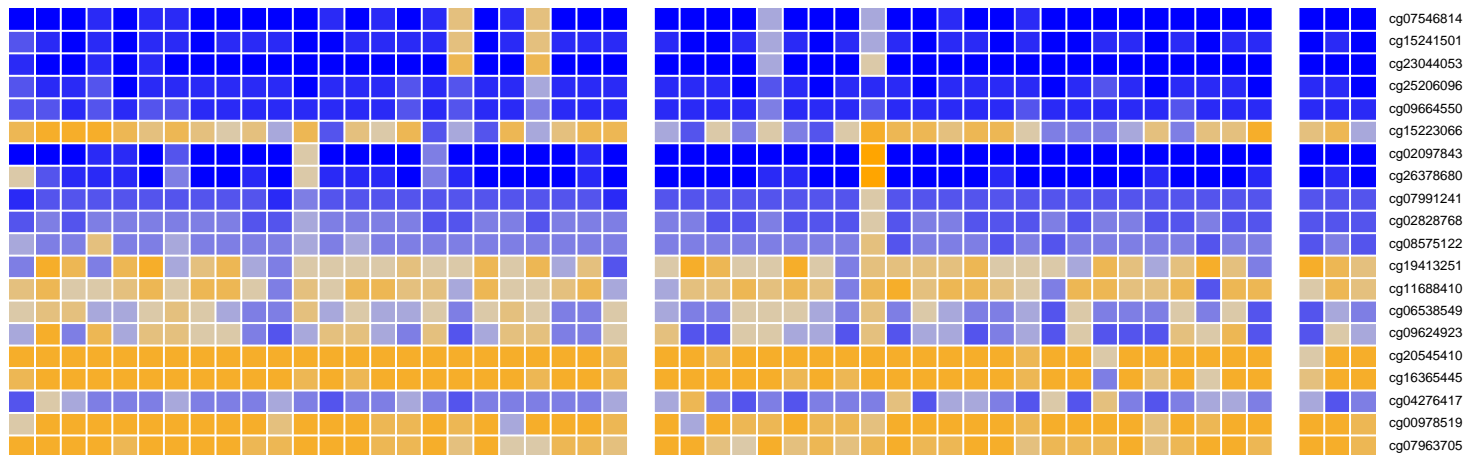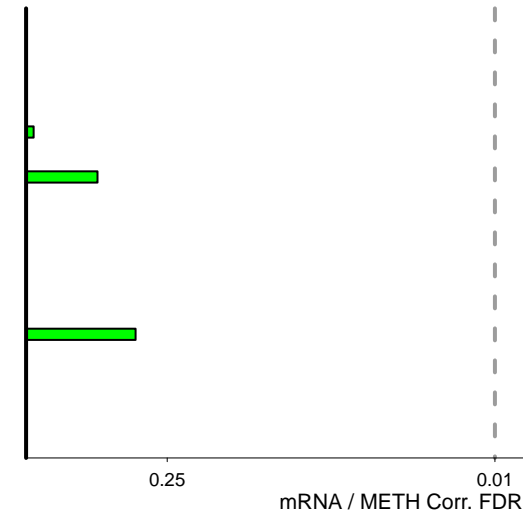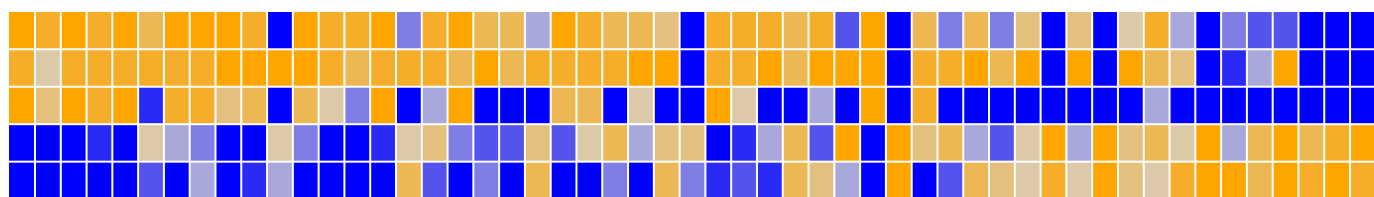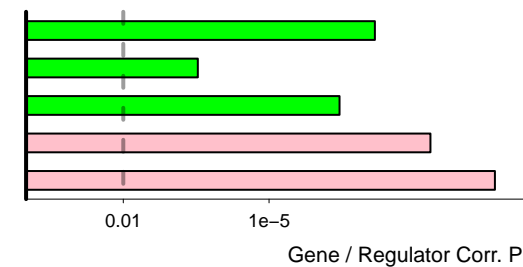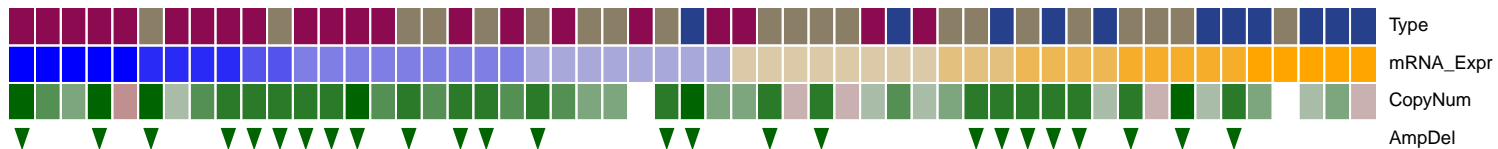

- S2374
- S2357
- S2408
- S2510
- S2391
- S2333
- S2216
- S2320
- S2279
- S2508
- S2549
- S2718
- S2189
- S2373
- S2521
- S2654
- S2247
- S2765
- S2392
- S2761
- S2650
- S2406
- S2596
- S2380
- S2667
- S2153
- S2686
- S2330
- S2668
- S2734
- S2423
- S2097
- S2495
- S2400
- S2770A
- S2379
- S2645
- S2410
- S2405
- S2767
- S2470
- S2812
- S2356
- S2365
- S2381
- S2800
- S2125
- S2731
- S2583
- S2350
- S2338
- S2688
- S2261

# VCAN

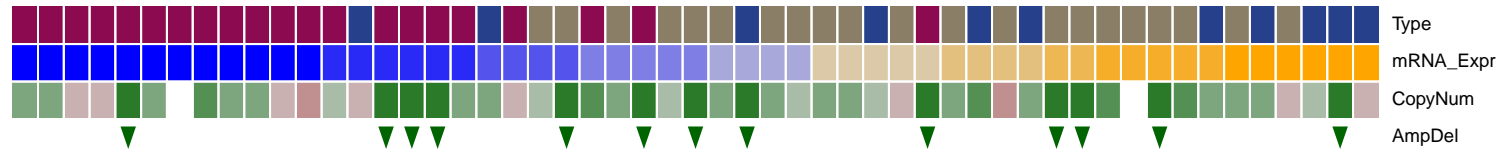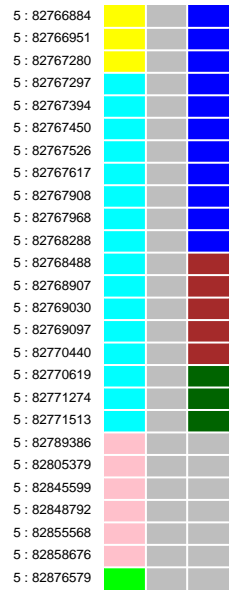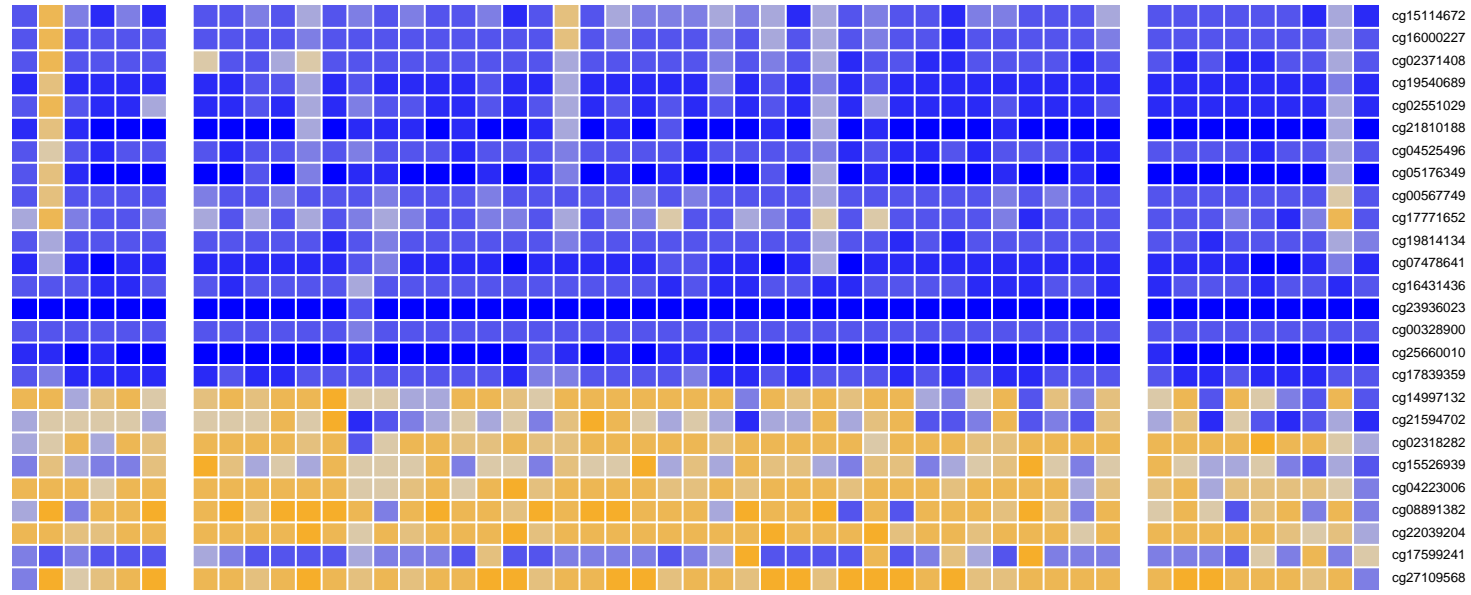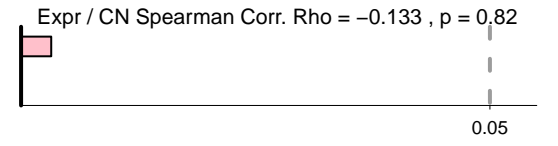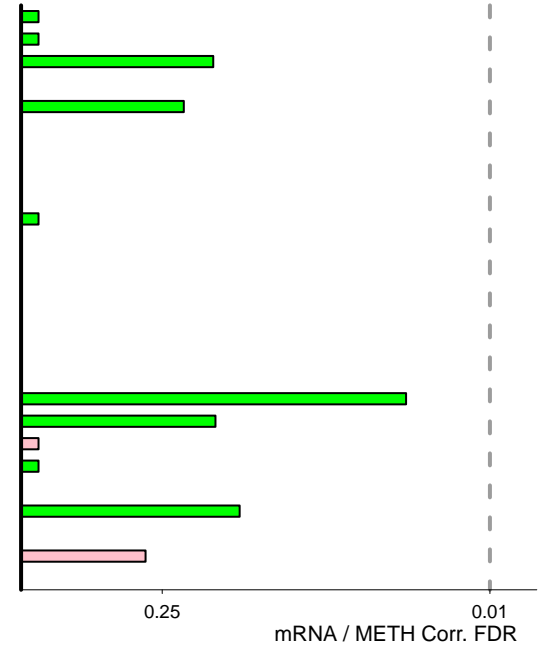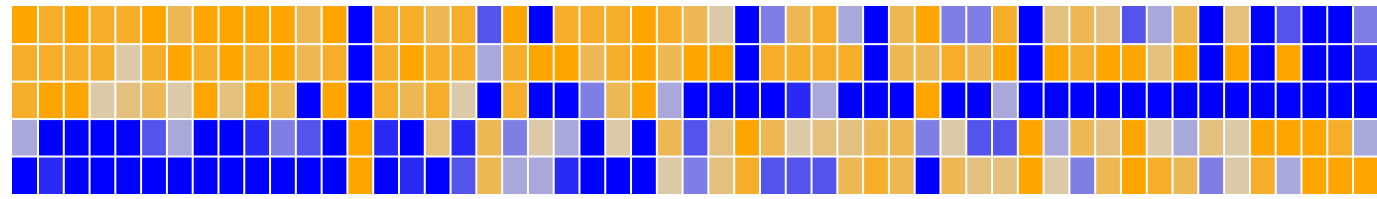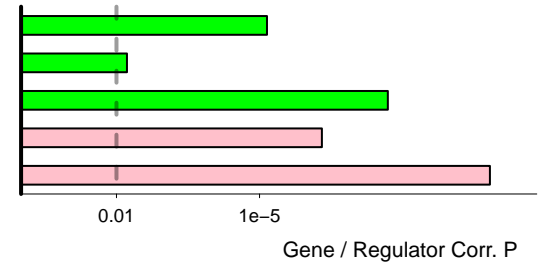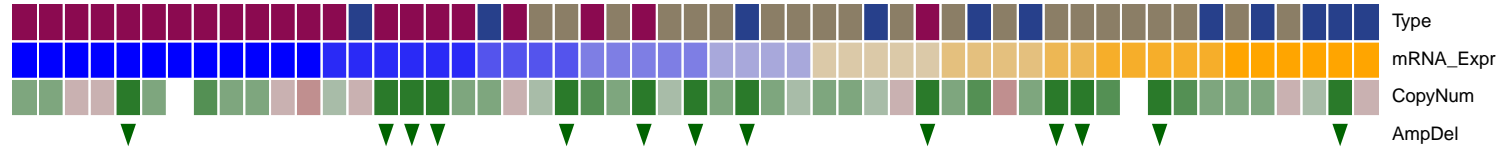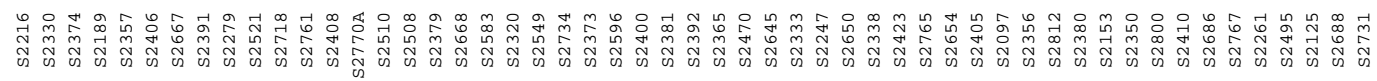

# NNMT

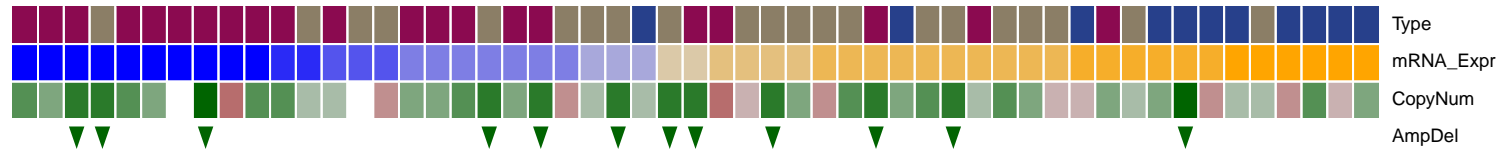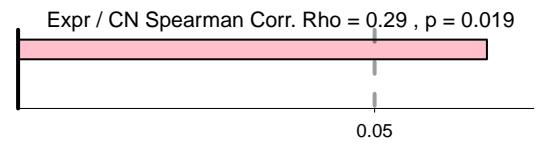

11:114127924  
11:114127960  
11:114128517  
11:114129200  
11:114151397  
11:114156964  
11:114165661  
11:114165695  
11:114166440  
11:114166446  
11:114166636  
11:114178729

GeneLoc  
PromoterAssoc  
CpGIsland

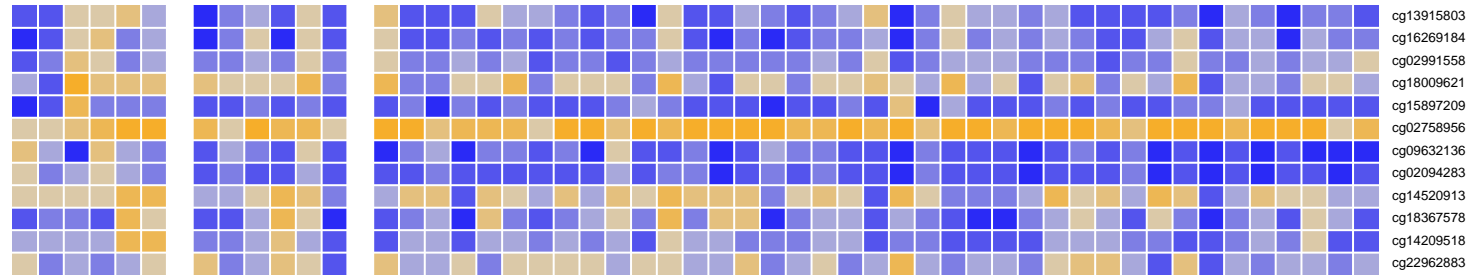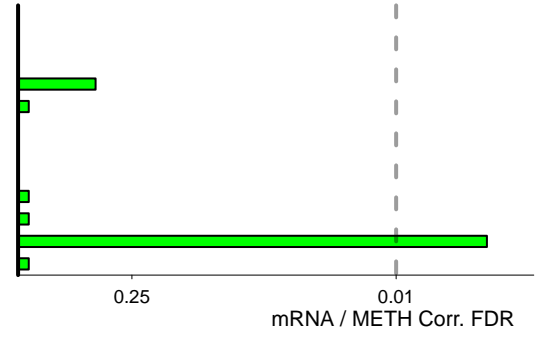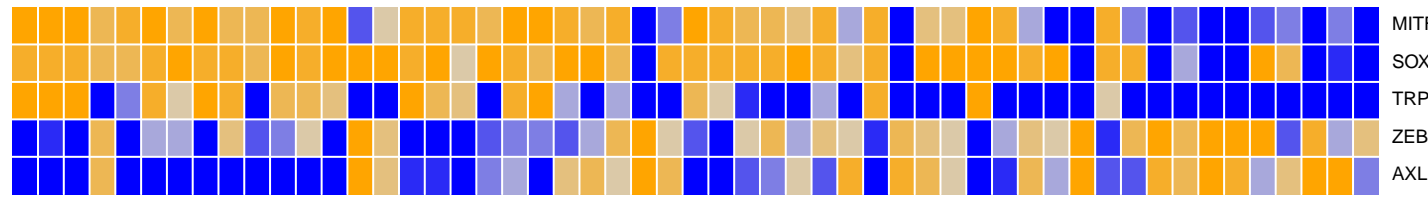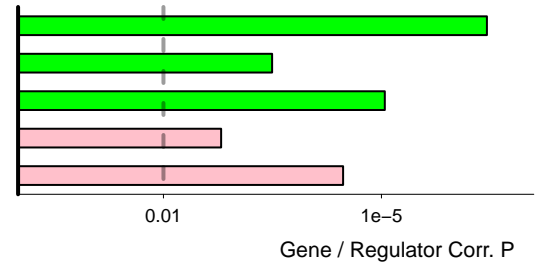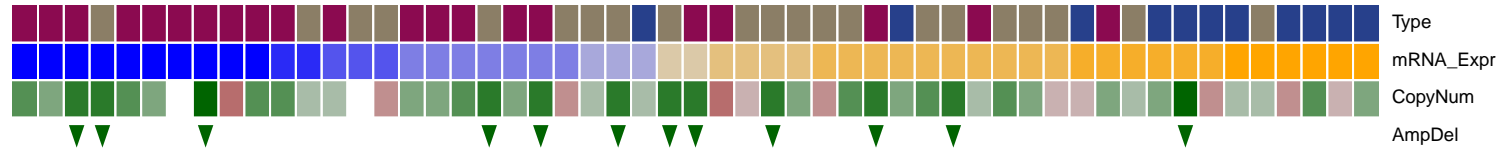

S2374  
S2521  
S2391  
S2423  
S2373  
S2216  
S2667  
S2408  
S2379  
S2761  
S2718  
S2596  
S2279  
S2350  
S2365  
S2330  
S2508  
S2357  
S2392  
S2320  
S2765  
S2097  
S2410  
S2381  
S2356  
S2654  
S2406  
S2189  
S2333  
S2380  
S2812  
S2247  
S2800  
S2510  
S2338  
S2153  
S2767  
S2400  
S2734  
S2650  
S2549  
S2770A  
S2668  
S2645  
S2470  
S2583  
S2125  
S2261  
S2495  
S2405  
S2688  
S2731  
S2686

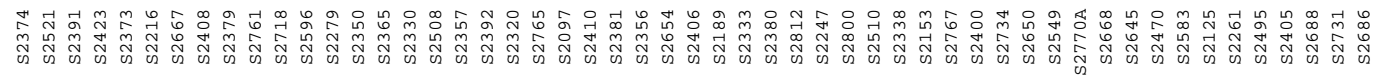

Type  
mRNA\_Expr  
CopyNum  
AmpDel



# TNFAIP2

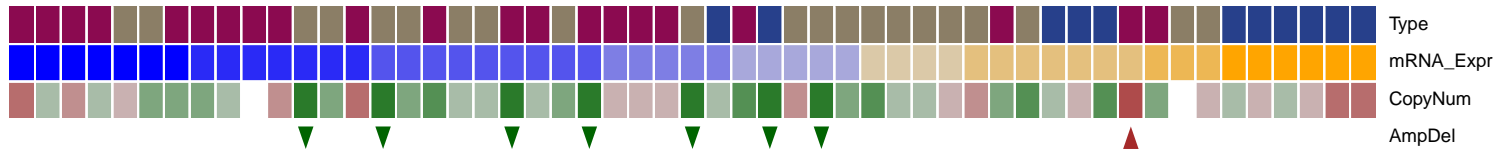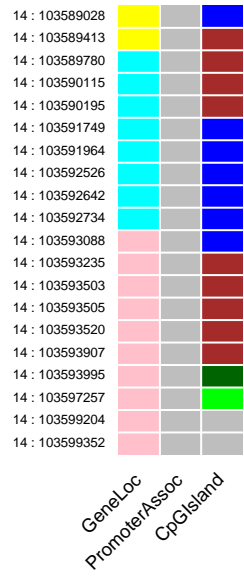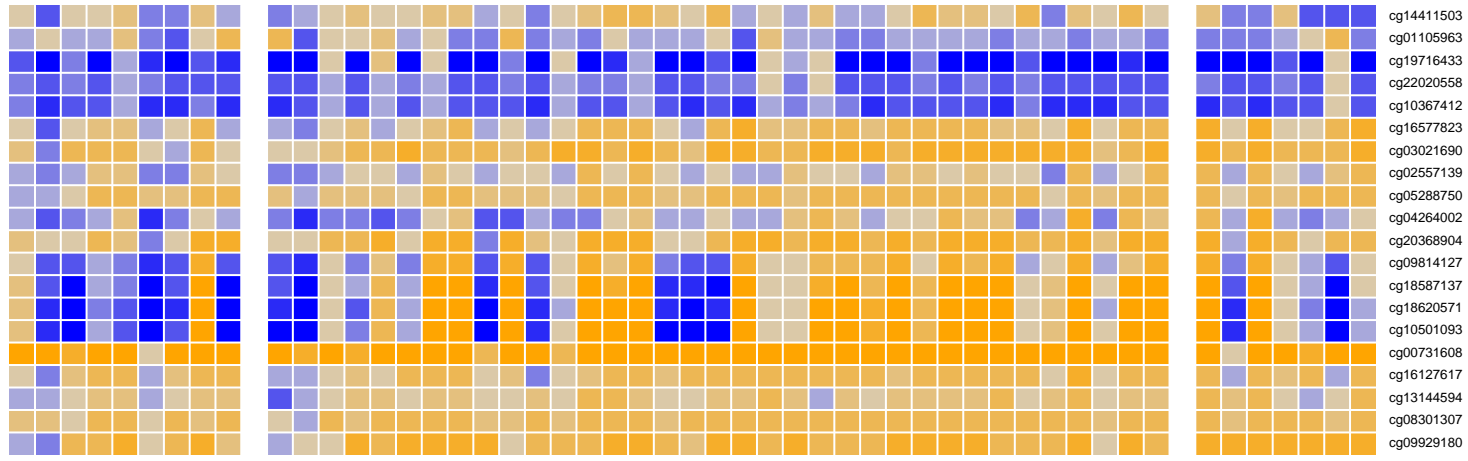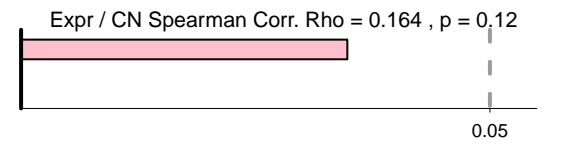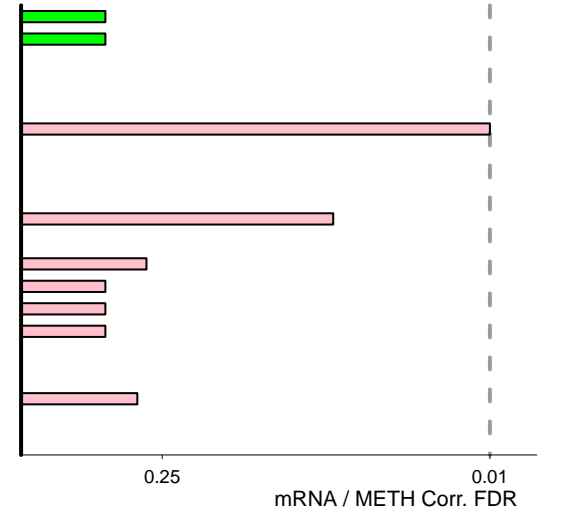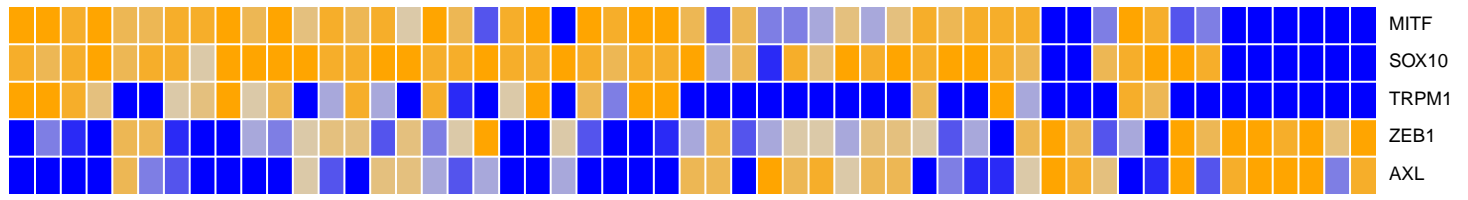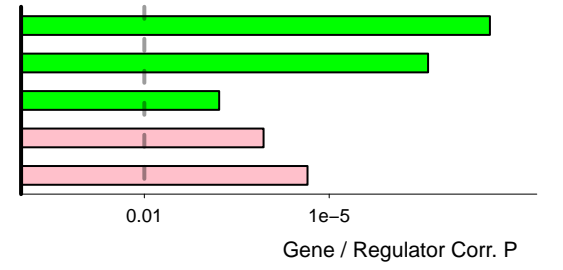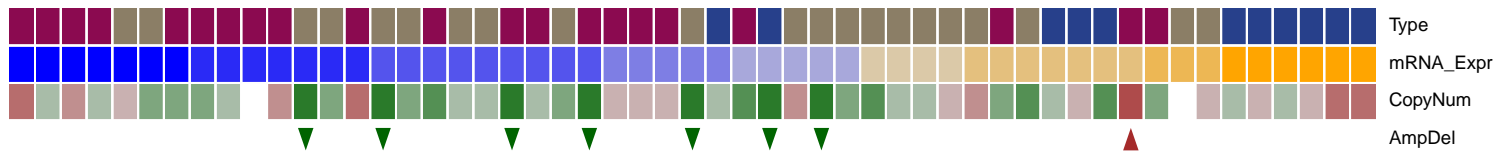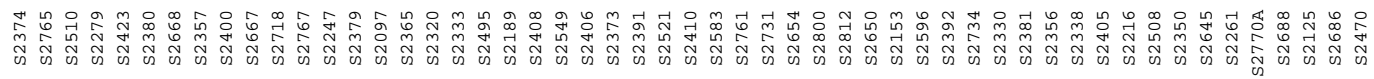

# ITGA5

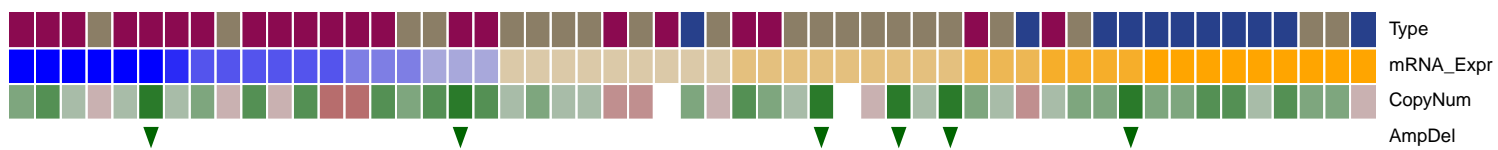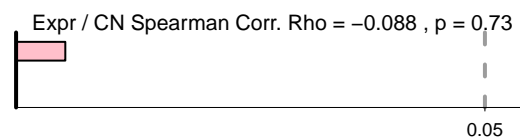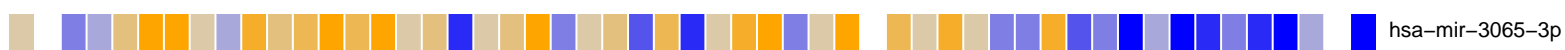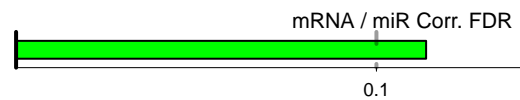

12:54814557  
12:54813361  
12:54812824  
12:54812606  
12:54812085  
12:54812000  
12:54811762  
12:54809239  
12:54806218  
12:54805345

GeneLoc  
PromoterAssoc  
CpGIsland

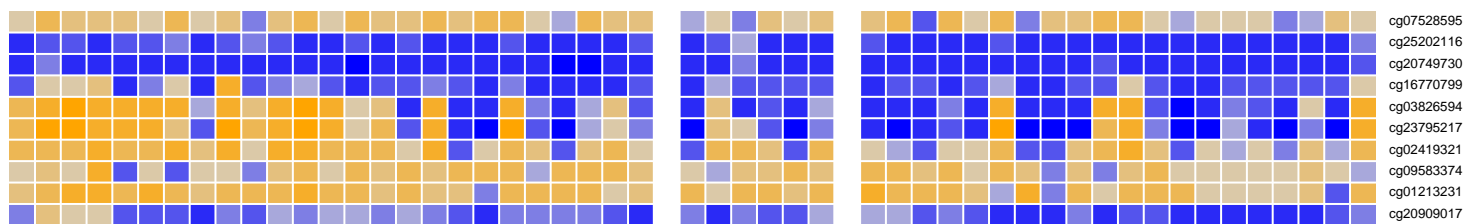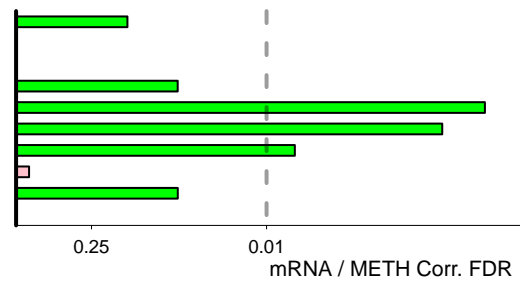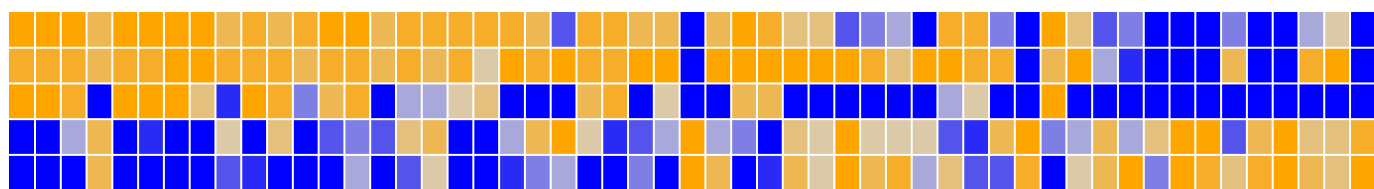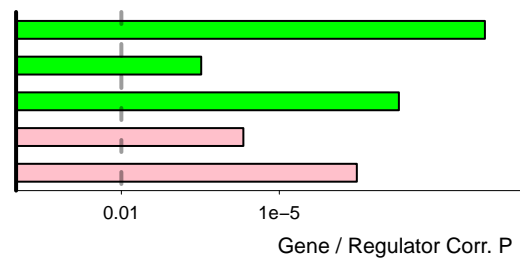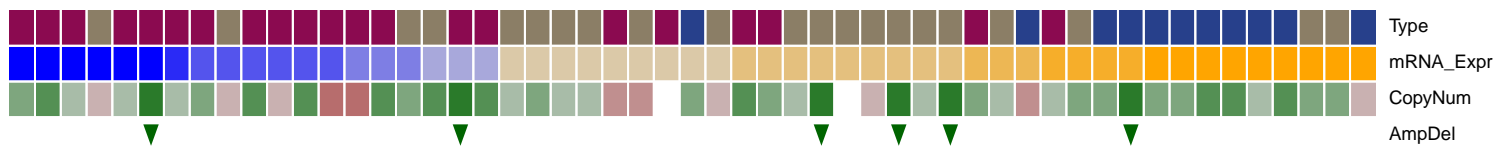

S2374  
S2391  
S2216  
S2423  
S2408  
S2521  
S2400  
S2279  
S2333  
S2330  
S2379  
S2373  
S2406  
S2320  
S2761  
S2247  
S2381  
S2189  
S2357  
S2734  
S2380  
S2495  
S2596  
S2510  
S2392  
S2667  
S2125  
S2410  
S2718  
S2508  
S2153  
S2767  
S2350  
S2654  
S2800  
S2549  
S2097  
S2668  
S2645  
S2470  
S2765  
S2812  
S2583  
S2731  
S2686  
S2356  
S2261  
S2405  
S2338  
S2770A  
S2650  
S2365  
S2688

# FSCN1

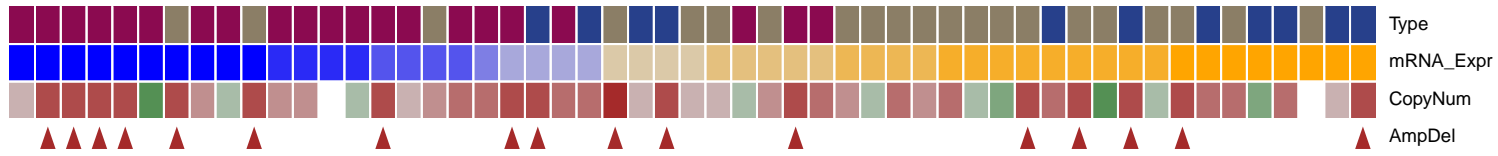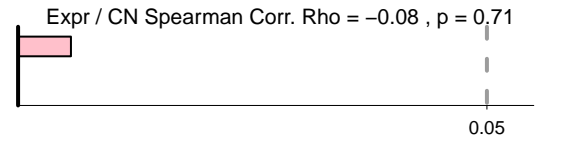

7: 5631189  
7: 5631268  
7: 5632281  
7: 5632593  
7: 5632954  
7: 5633068  
7: 5633086  
7: 5634164  
7: 5635134  
7: 5635820  
7: 5635953  
7: 5637739  
7: 5639063  
7: 5641113  
7: 5641966  
7: 5642705  
7: 5642784  
7: 5642848  
7: 5643021  
7: 5643158  
7: 5644940  
7: 5645051  
7: 5645728  
7: 5645778  
7: 5645984  
7: 5646023  
7: 5646121

GeneLoc  
PromoterAssoc  
CpGIsland

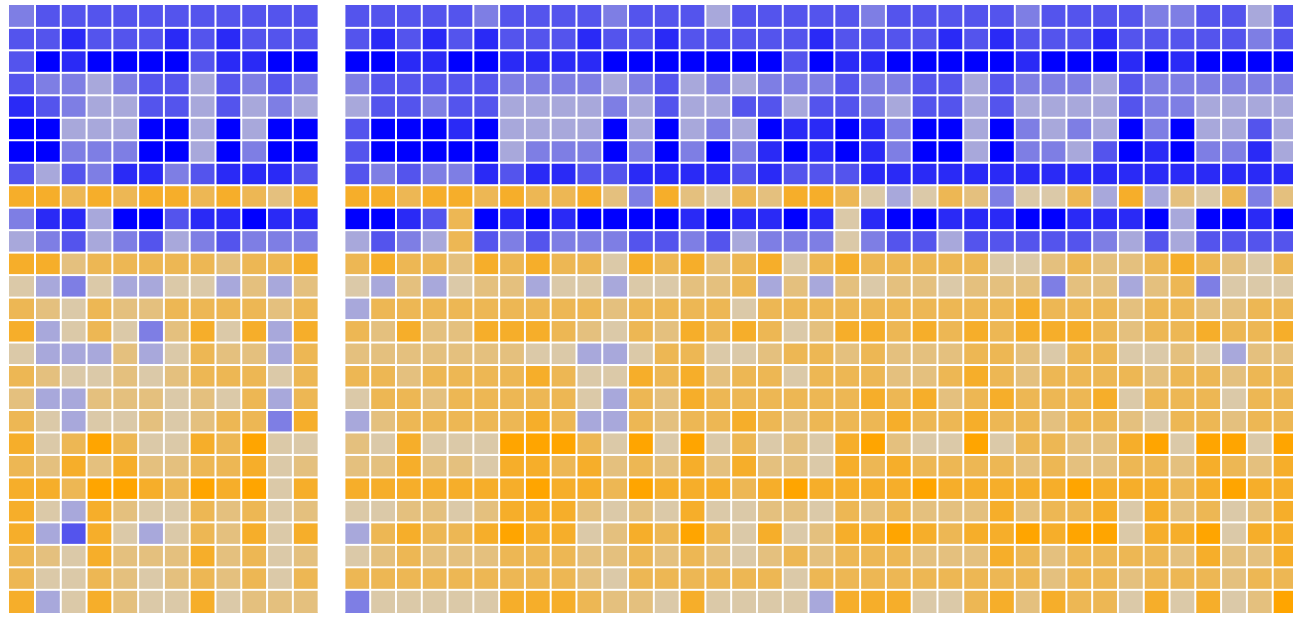

cg01418527  
cg03462130  
cg13038241  
cg25176823  
cg02498722  
cg18724565  
cg22447539  
cg20812117  
cg15246238  
cg12600030  
cg24239690  
cg13266018  
cg08125726  
cg24512685  
cg23673980  
cg12741436  
cg00513981  
cg04630639  
cg09246253  
cg05269678  
cg05998109  
cg27413316  
cg09188385  
cg13087761  
cg06969129  
cg04952186  
cg23567366

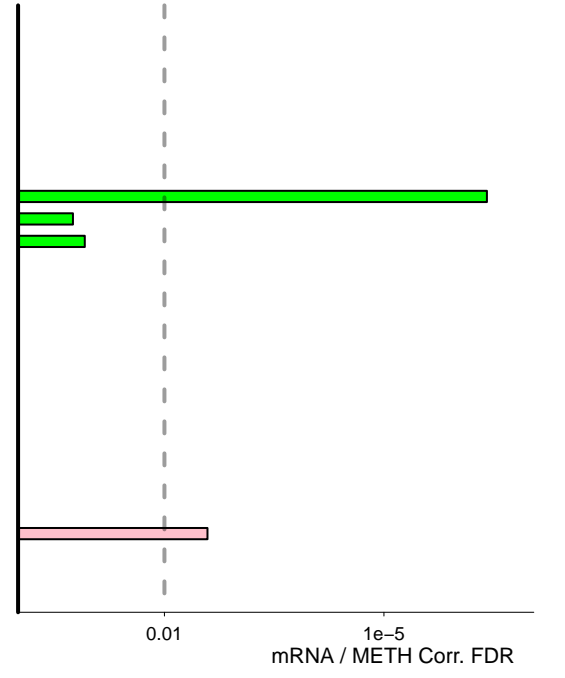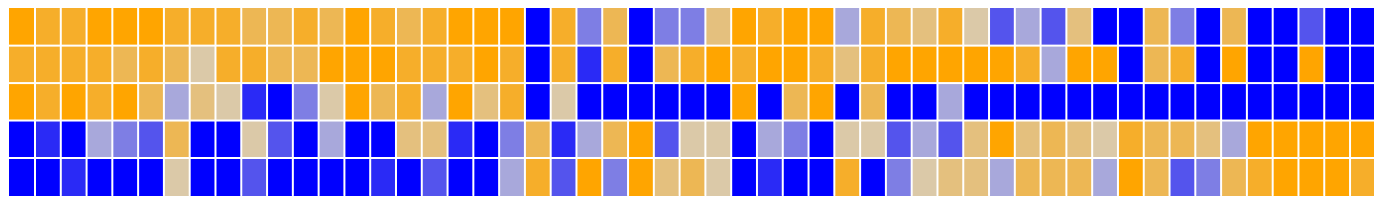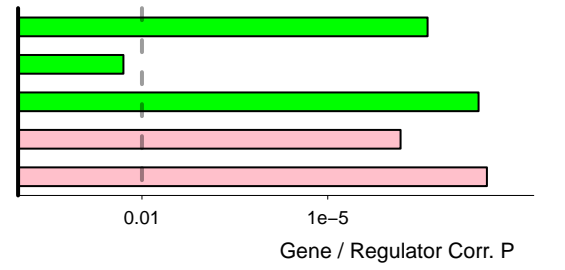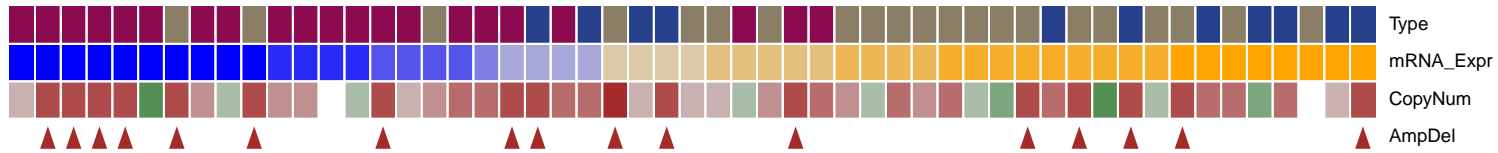

S2391  
S2510  
S2330  
S2216  
S2765  
S2406  
S2381  
S2357  
S2189  
S2333  
S2761  
S2373  
S2667  
S2400  
S2508  
S2379  
S2247  
S2521  
S2279  
S2320  
S2338  
S2668  
S2731  
S2380  
S2356  
S2405  
S2654  
S2767  
S2408  
S2734  
S2718  
S2374  
S2800  
S2596  
S2392  
S2812  
S2097  
S2365  
S2495  
S2650  
S2583  
S2153  
S2549  
S2688  
S2423  
S2645  
S2686  
S2410  
S2261  
S2125  
S2350  
S2770A  
S2470

# EDIL3

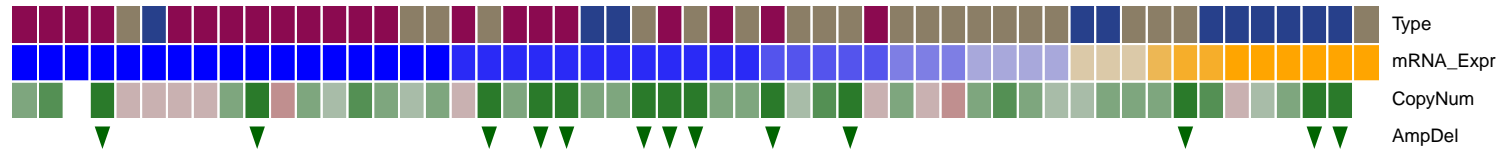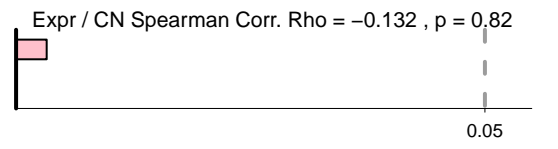

5 : 83681955  
 5 : 83681563  
 5 : 83680968  
 5 : 83680719  
 5 : 83680717  
 5 : 83680690  
 5 : 83680326  
 5 : 83680253  
 5 : 83680066  
 5 : 83679941  
 5 : 83679643  
 5 : 83679364  
 5 : 83679211  
 5 : 83679123  
 5 : 83679005  
 5 : 83678903  
 5 : 83678796  
 5 : 83678480  
 5 : 83678235  
 5 : 83678141  
 5 : 83677872  
 5 : 83639995  
 5 : 83588224  
 5 : 83585467  
 5 : 83409549  
 5 : 83332828  
 5 : 83289498  
 5 : 83268490  
 5 : 83253023

GeneLoc  
 PromoterAssoc  
 CpGIsland

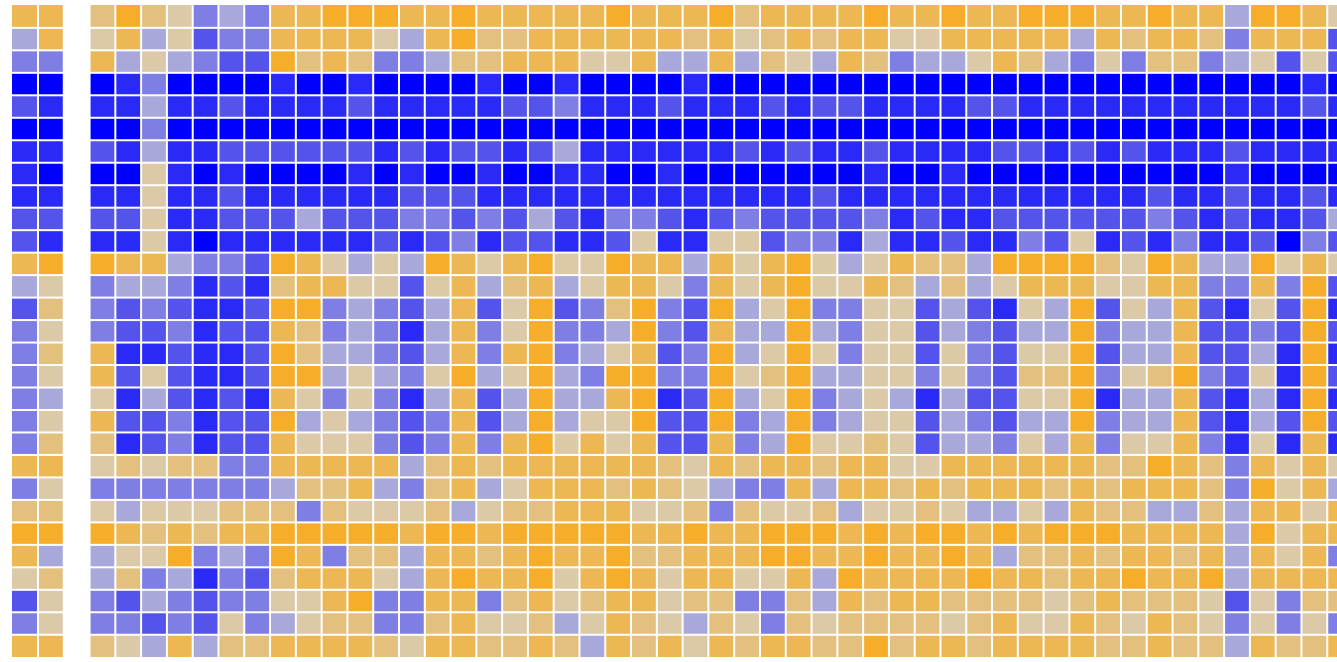

cg16306043  
 cg19722082  
 cg17559809  
 cg22920665  
 cg03478689  
 cg15716405  
 cg16773899  
 cg16099804  
 cg24988625  
 cg07201620  
 cg07690181  
 cg01072952  
 cg04512917  
 cg11559250  
 cg01604322  
 cg24553364  
 cg24002167  
 cg17978562  
 cg05179846  
 cg12460433  
 cg19613968  
 cg21221557  
 cg19747990  
 cg12197168  
 cg19680583  
 cg11697123  
 cg02067030  
 cg02265105  
 cg22022671

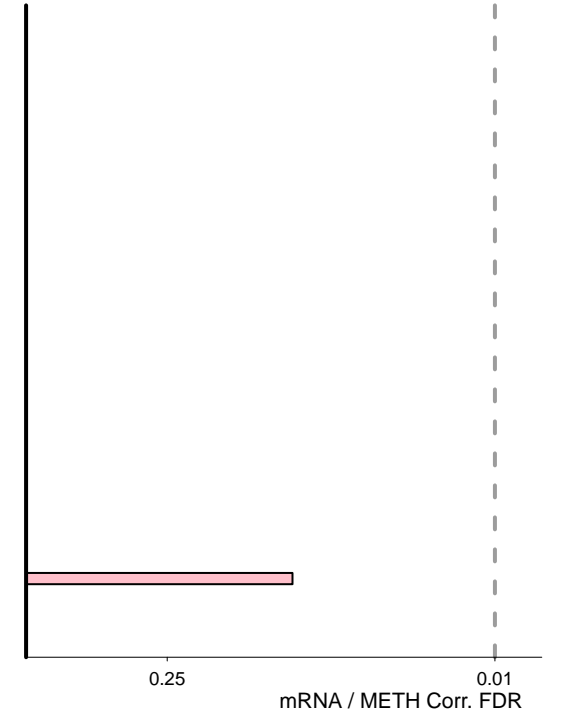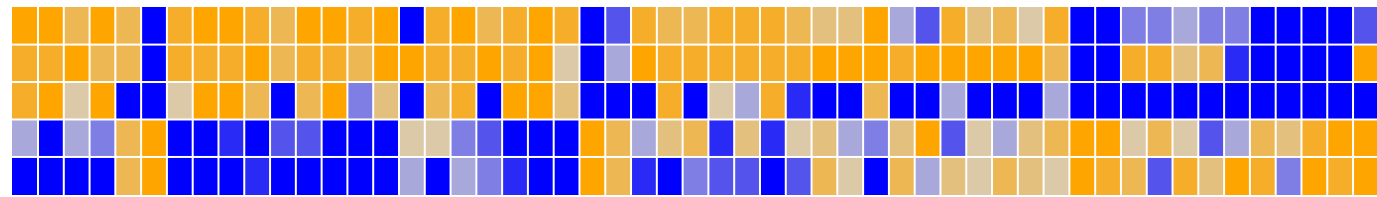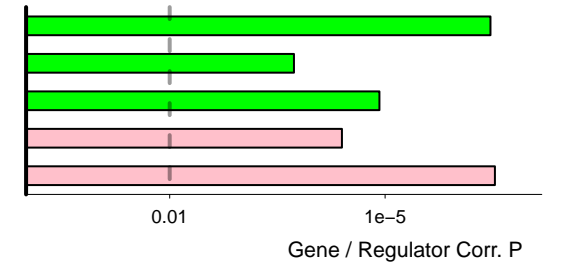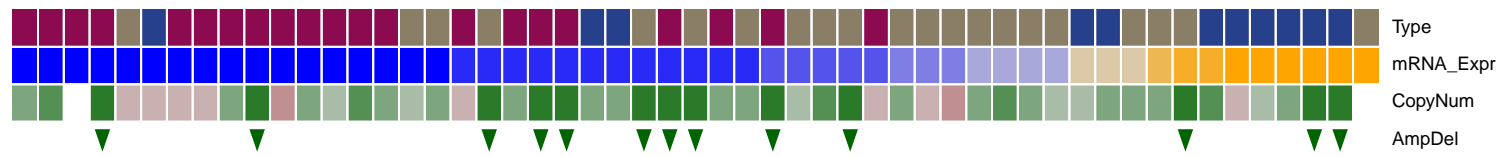

S2216  
 S2391  
 S2667  
 S2765  
 S2423  
 S2770A  
 S2189  
 S2374  
 S2521  
 S2508  
 S2761  
 S2406  
 S2408  
 S2373  
 S2279  
 S2549  
 S2596  
 S2320  
 S2392  
 S2330  
 S2400  
 S2357  
 S2356  
 S2583  
 S2734  
 S2379  
 S2380  
 S2668  
 S2247  
 S2510  
 S2333  
 S2153  
 S2812  
 S2718  
 S2650  
 S2495  
 S2097  
 S2767  
 S2410  
 S2365  
 S2381  
 S2125  
 S2261  
 S2654  
 S2645  
 S2800  
 S2405  
 S2731  
 S2338  
 S2686  
 S2688  
 S2470  
 S2350

Type  
 mRNA\_Expr  
 CopyNum  
 AmpDel

Gene / Regulator Corr. P

# VGLL3

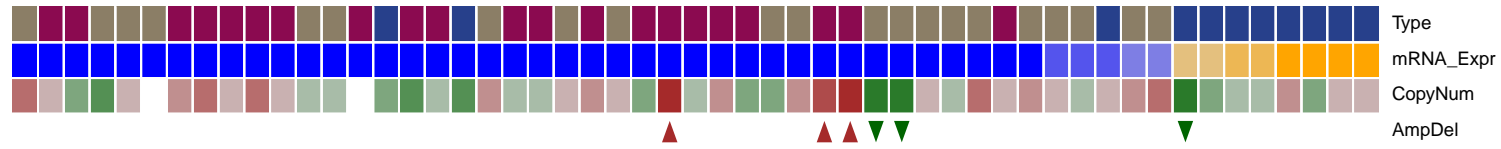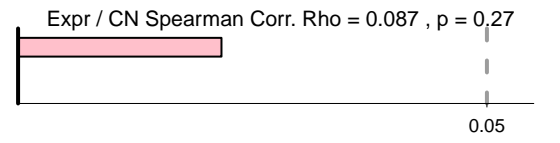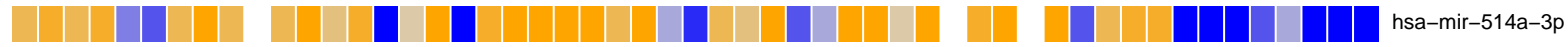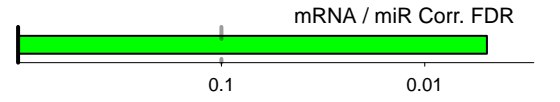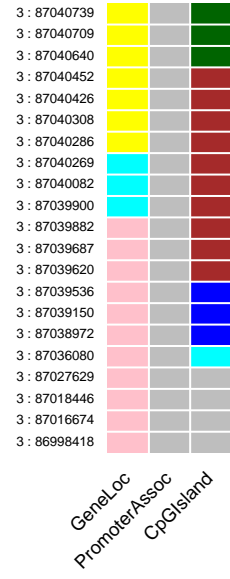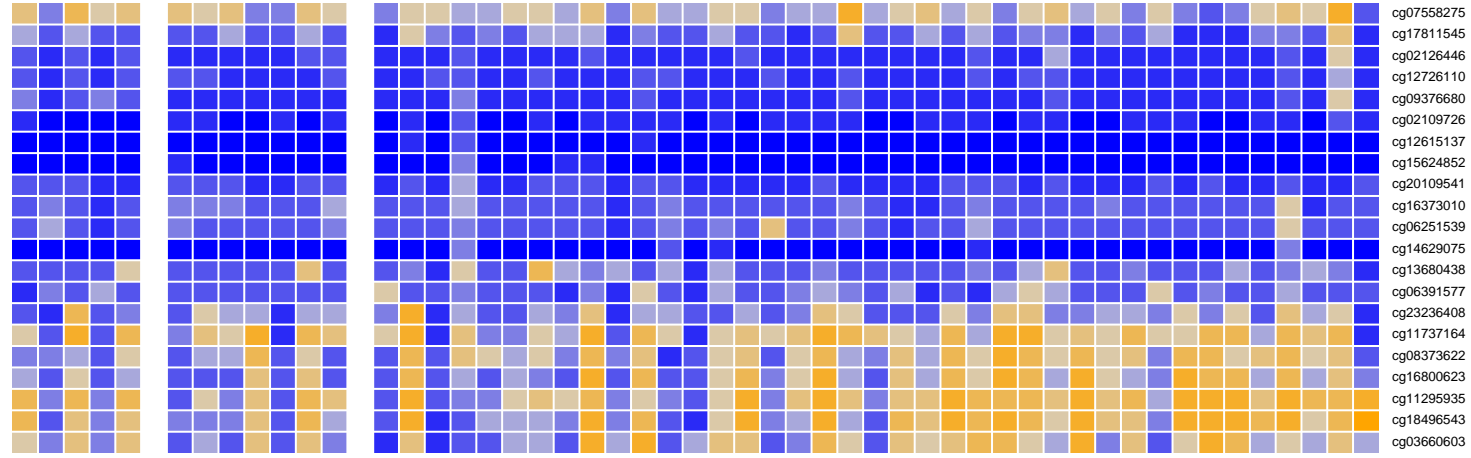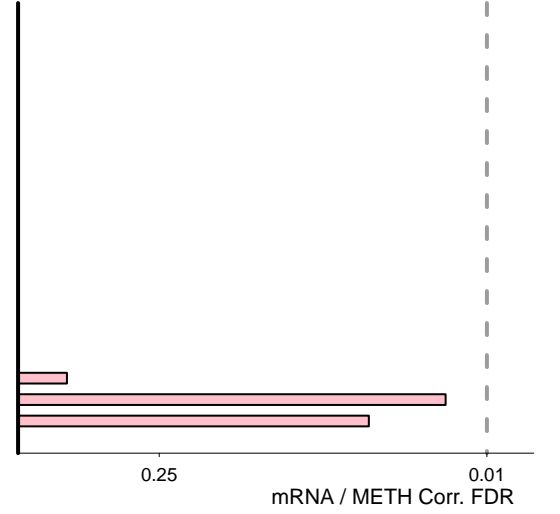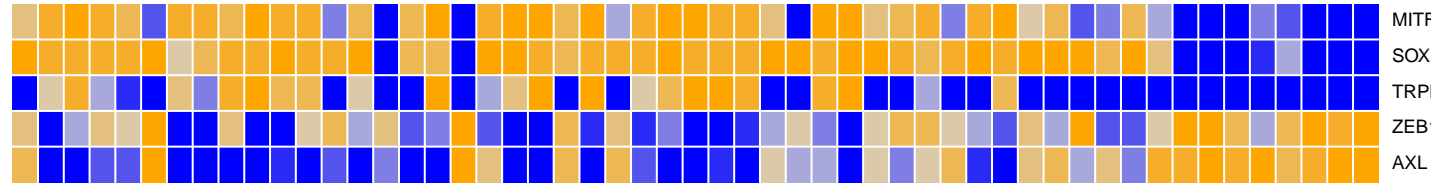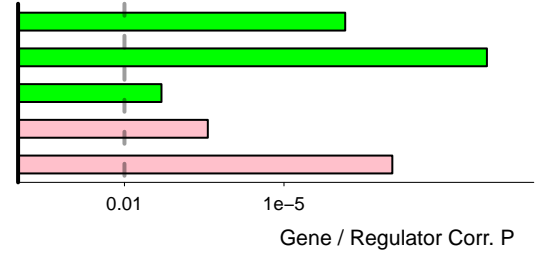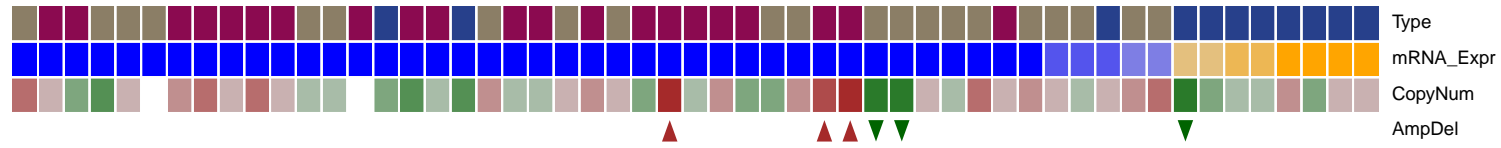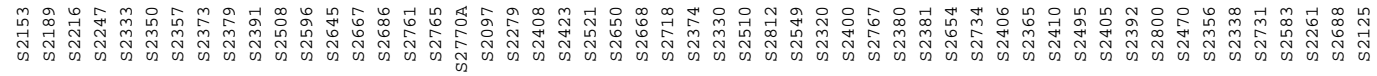

# DDAH1

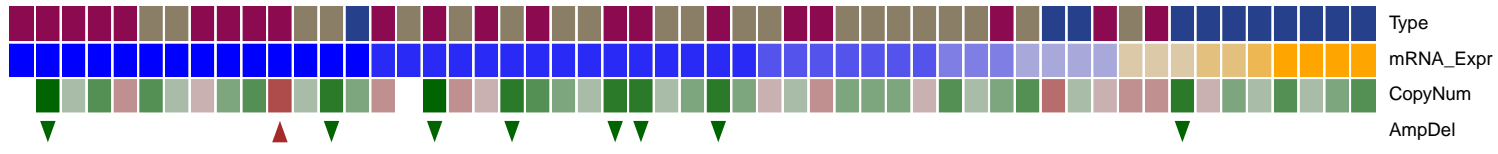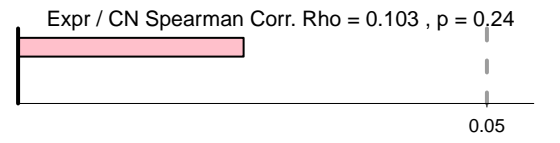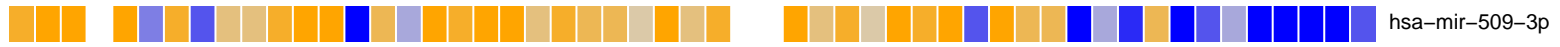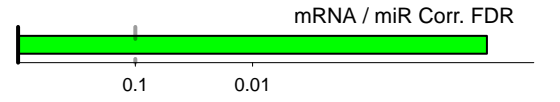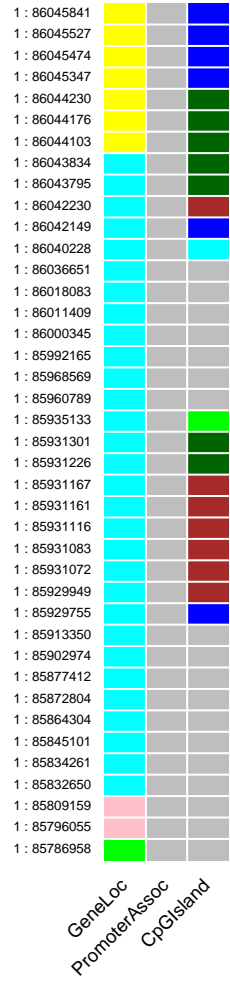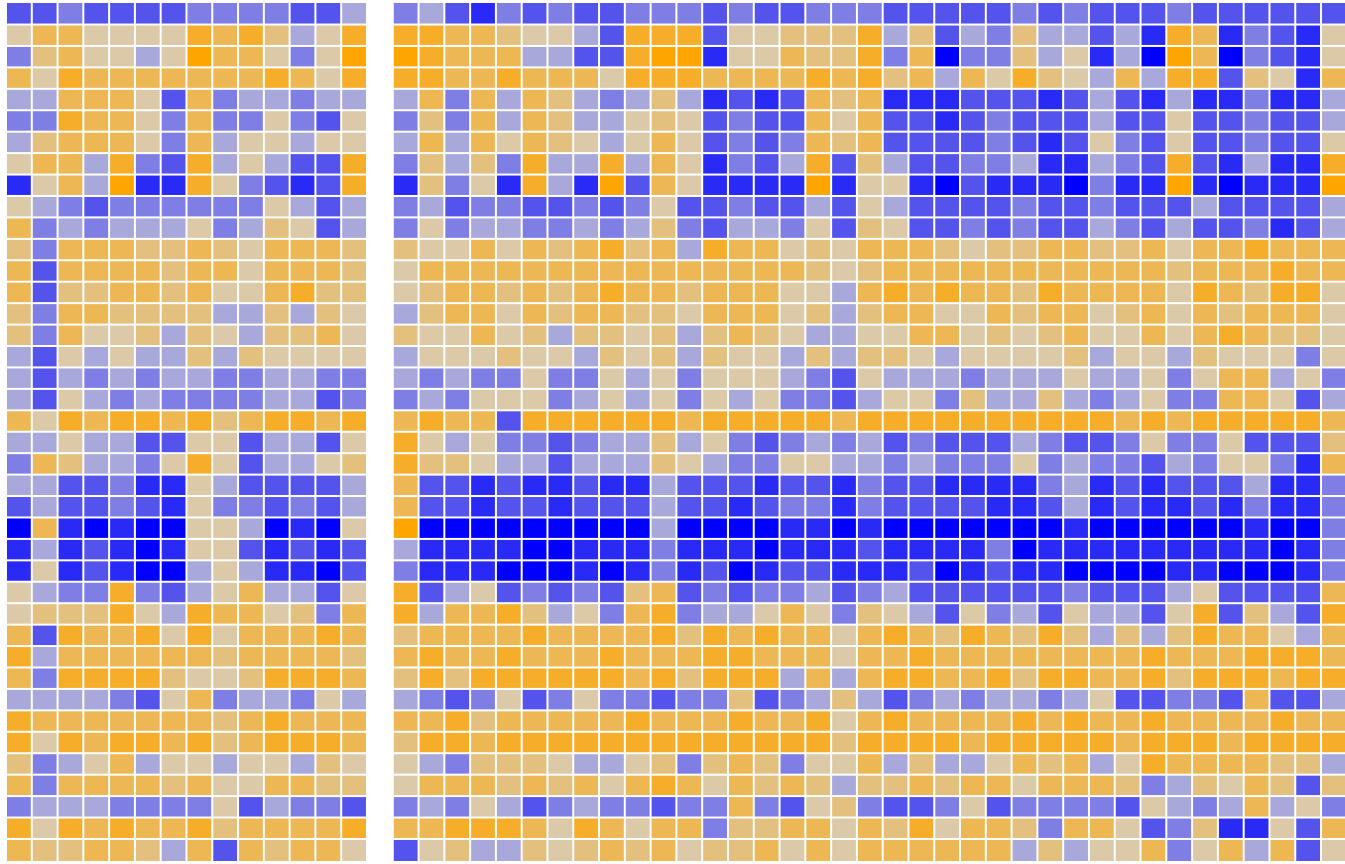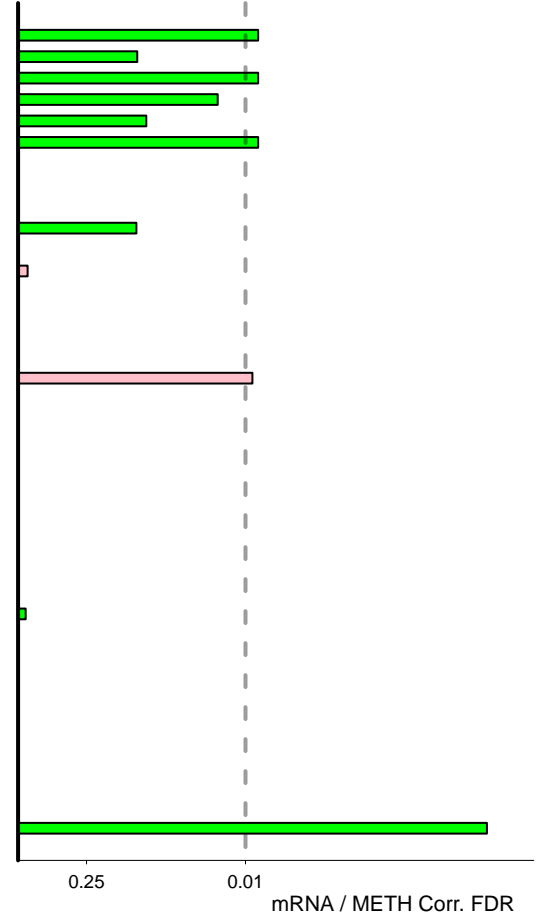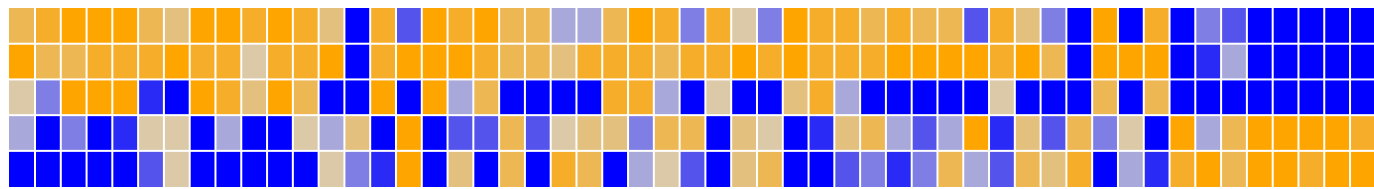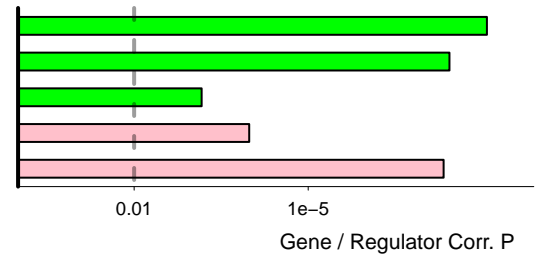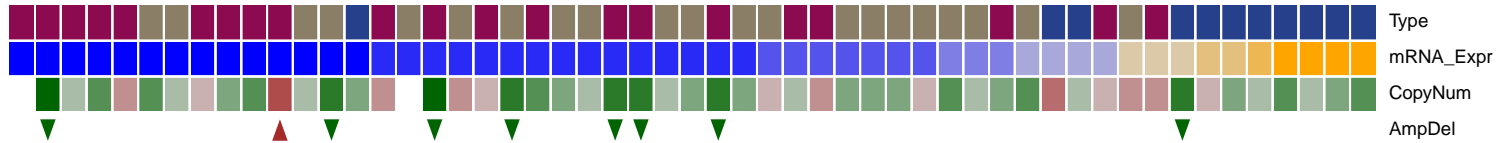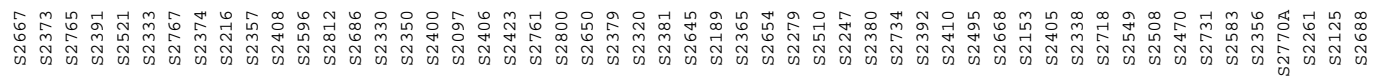

# ATP8B1

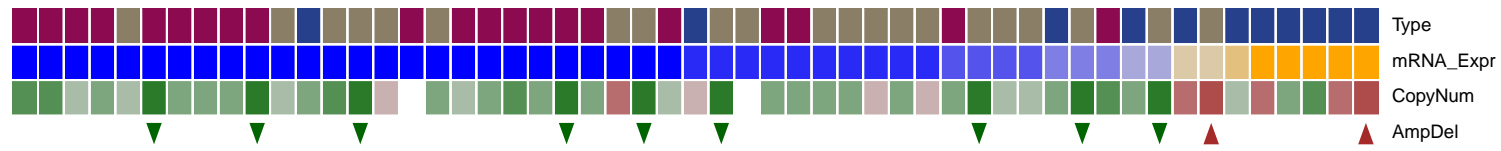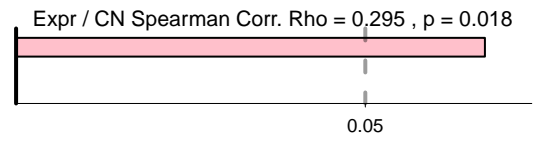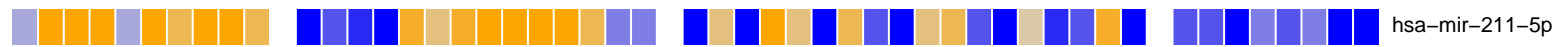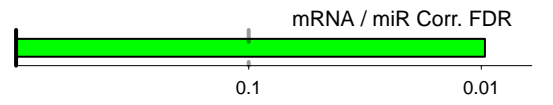

18 : 55471075  
 18 : 55471021  
 18 : 55470506  
 18 : 55470404  
 18 : 55470401  
 18 : 55469864  
 18 : 55469758  
 18 : 55469509  
 18 : 55469021  
 18 : 55400167  
 18 : 55399003  
 18 : 55316927

GeneLoc  
 PromoterAssoc  
 CpGIsland

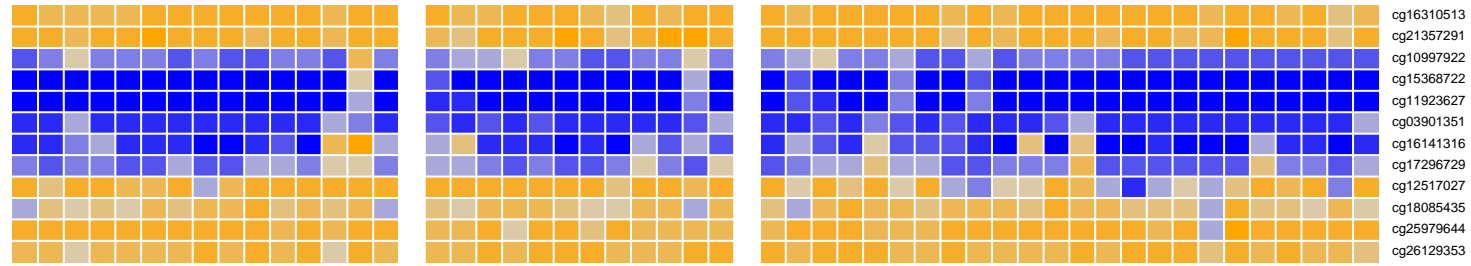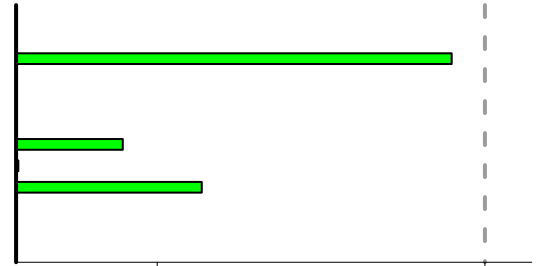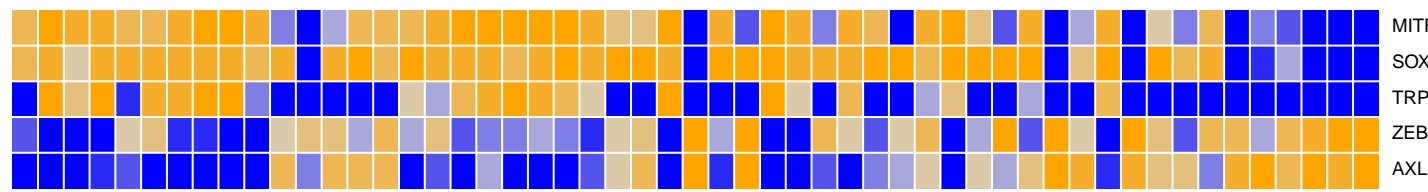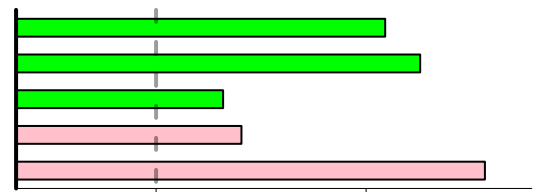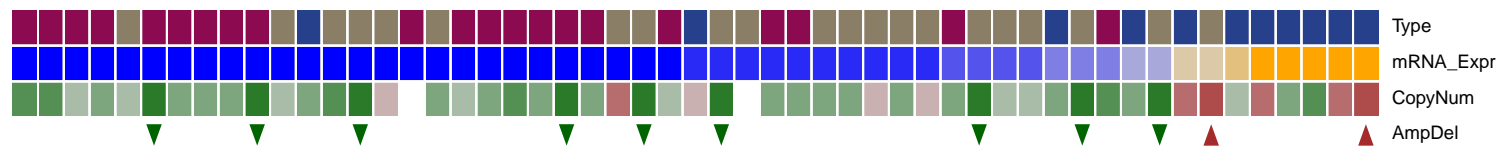

S2761  
 S2374  
 S2357  
 S2330  
 S2333  
 S2379  
 S2510  
 S2521  
 S2408  
 S2373  
 S2654  
 S2686  
 S2650  
 S2410  
 S2423  
 S2667  
 S2247  
 S2406  
 S2320  
 S2765  
 S2216  
 S2718  
 S2668  
 S2767  
 S2153  
 S2391  
 S2770A  
 S2734  
 S2350  
 S2400  
 S2189  
 S2645  
 S2596  
 S2392  
 S2549  
 S2381  
 S2279  
 S2812  
 S2495  
 S2097  
 S2356  
 S2800  
 S2508  
 S2470  
 S2365  
 S2405  
 S2380  
 S2338  
 S2731  
 S2583  
 S2688  
 S2261  
 S2125

# AMOTL2

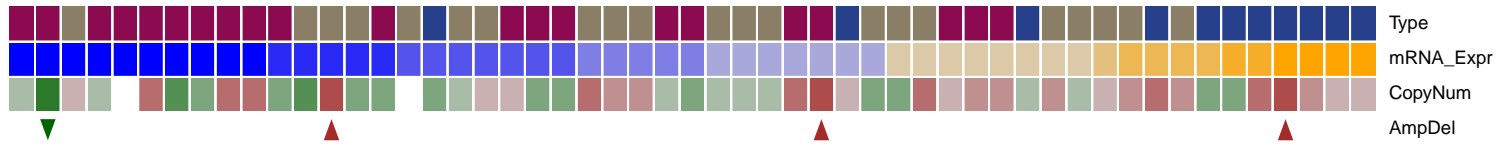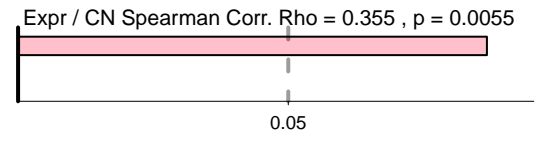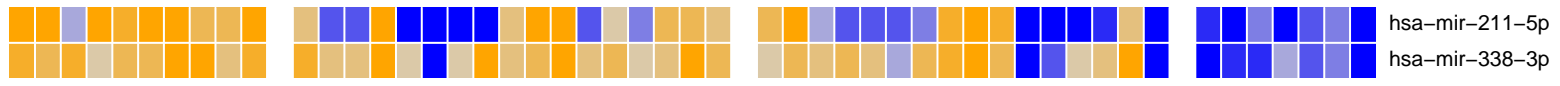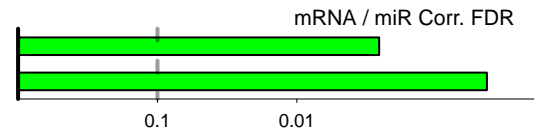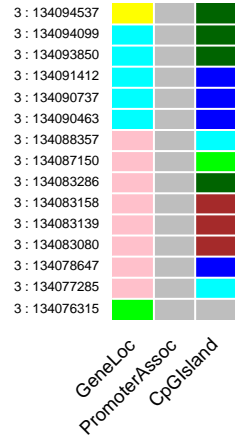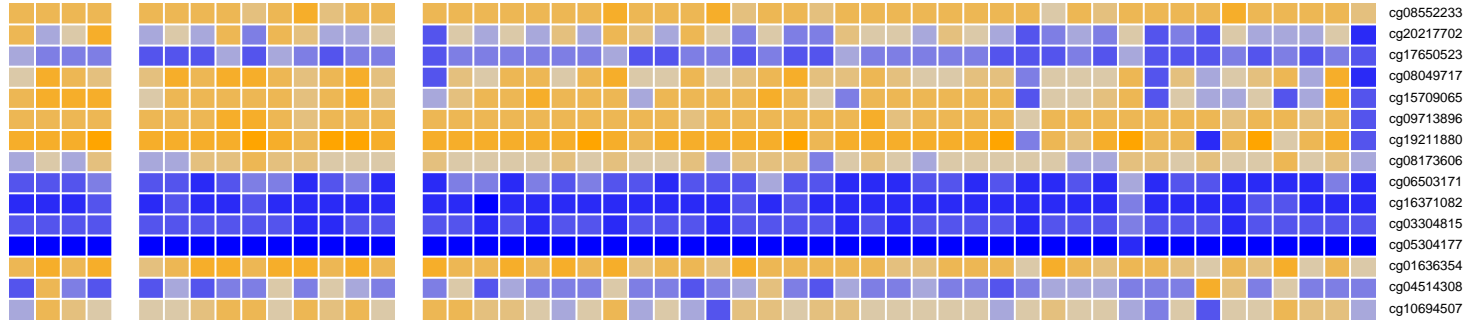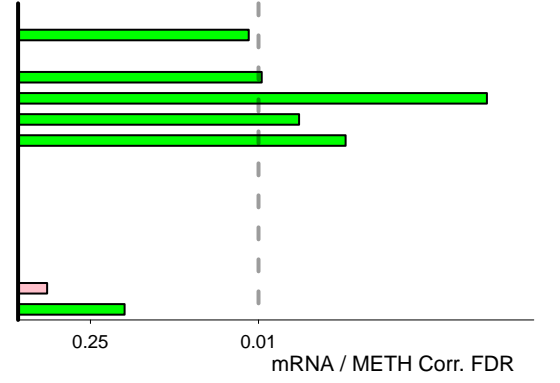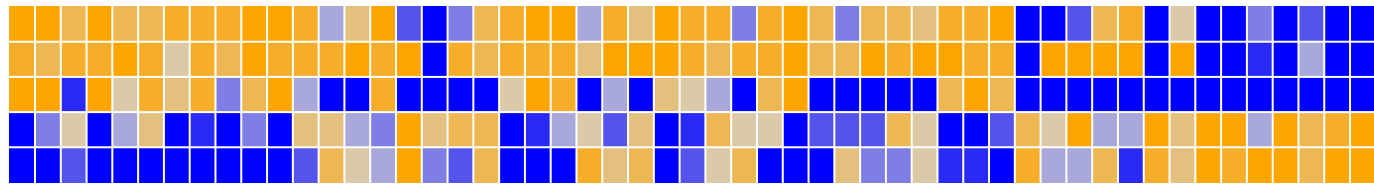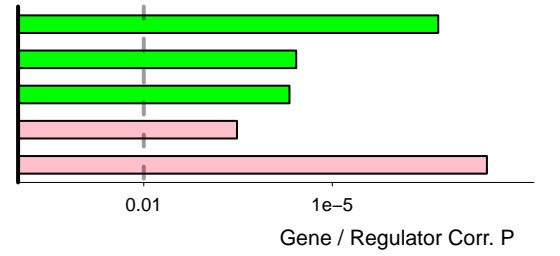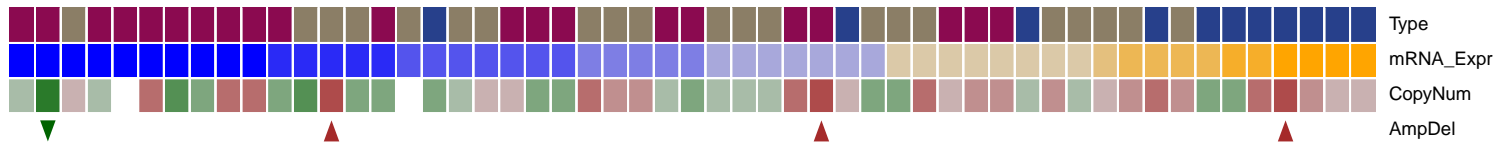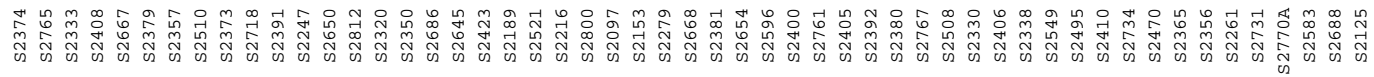



# LMO7

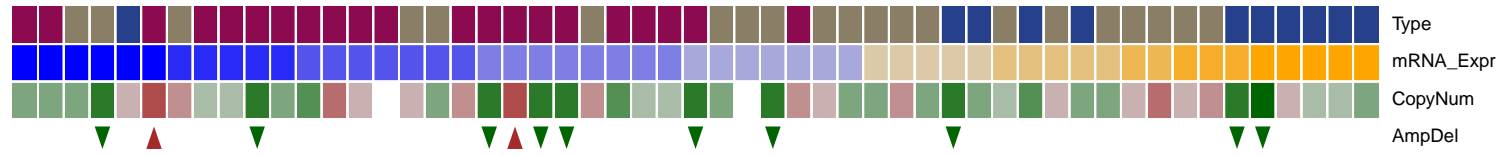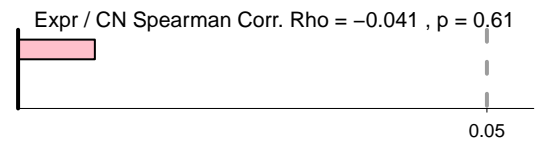

- 13 : 76194354
- 13 : 76195284
- 13 : 76203148
- 13 : 76207486
- 13 : 76209457
- 13 : 76209541
- 13 : 76210054
- 13 : 76210838
- 13 : 76211051
- 13 : 76211251
- 13 : 76215076
- 13 : 76235074
- 13 : 76244804
- 13 : 76250138
- 13 : 76259545
- 13 : 76279228
- 13 : 76291075
- 13 : 76313846
- 13 : 76323667
- 13 : 76333727
- 13 : 76334039
- 13 : 76334583
- 13 : 76334707
- 13 : 76334728
- 13 : 76334866
- 13 : 76337398
- 13 : 76344333
- 13 : 76361354
- 13 : 76363851
- 13 : 76377366
- 13 : 76387161
- 13 : 76392745
- 13 : 76430188
- 13 : 76430665
- 13 : 76430722

GeneLoc  
PromoterAssoc  
CpGIsland

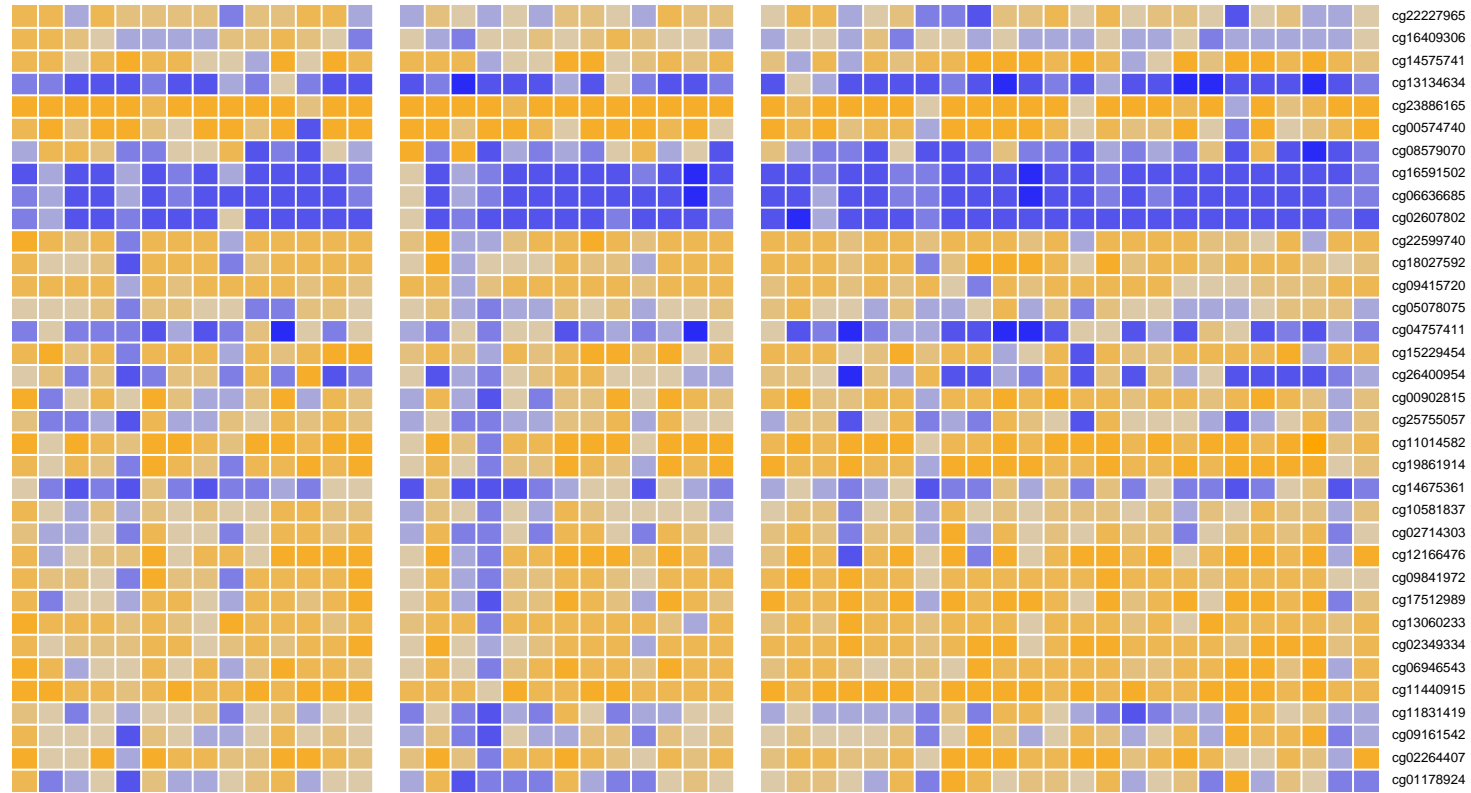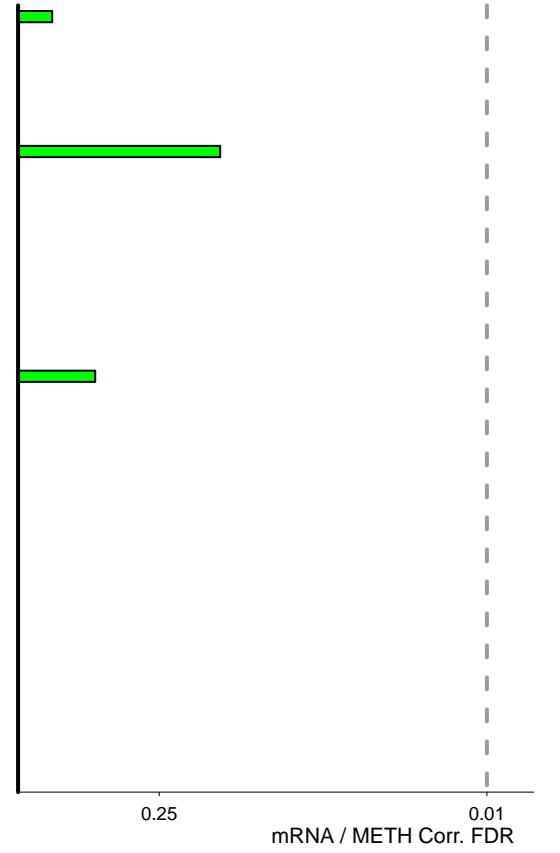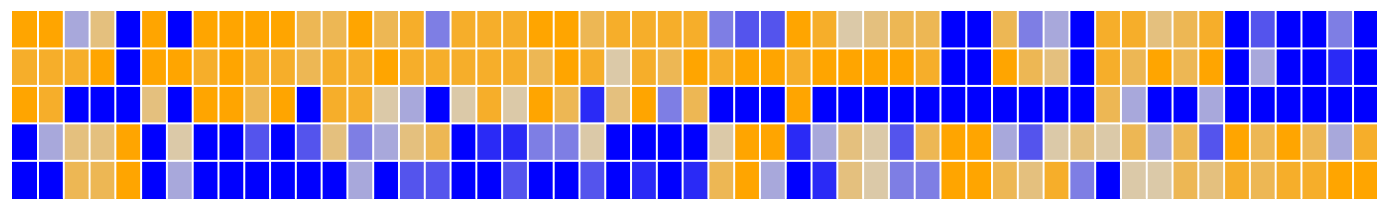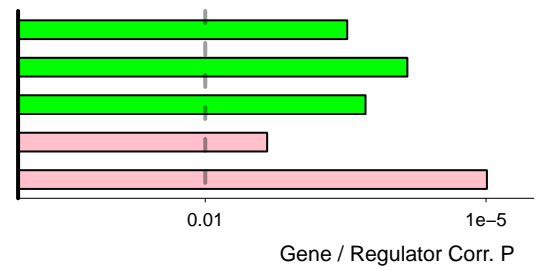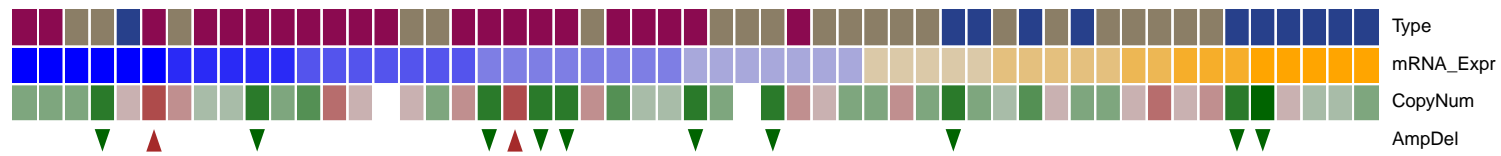

- S2391
- S2216
- S2650
- S2153
- S2770A
- S2279
- S2549
- S2374
- S2400
- S2406
- S2408
- S2761
- S2379
- S2320
- S2667
- S2247
- S2645
- S2189
- S2510
- S2668
- S2765
- S2718
- S2333
- S2357
- S2330
- S2373
- S2508
- S2654
- S2350
- S2495
- S2521
- S2734
- S2365
- S2767
- S2392
- S2380
- S2125
- S2356
- S2410
- S2405
- S2800
- S2686
- S2596
- S2381
- S2812
- S2423
- S2097
- S2470
- S2583
- S2261
- S2338
- S2731
- S2688

# RAC2

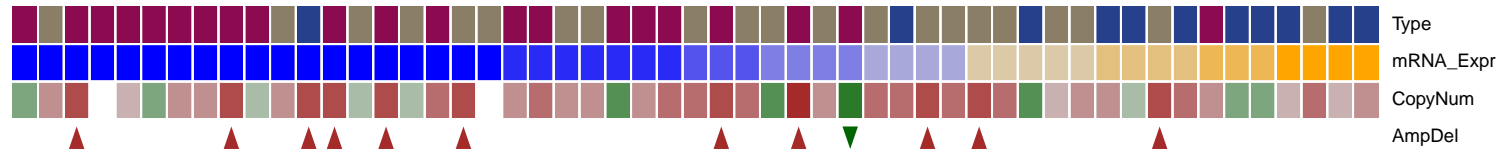

22:37641506  
 22:37640514  
 22:37640509  
 22:37640402  
 22:37640364  
 22:37640314  
 22:37640250  
 22:37625461  
 22:37621745

GeneLoc  
 PromoterAssoc  
 CpIsland

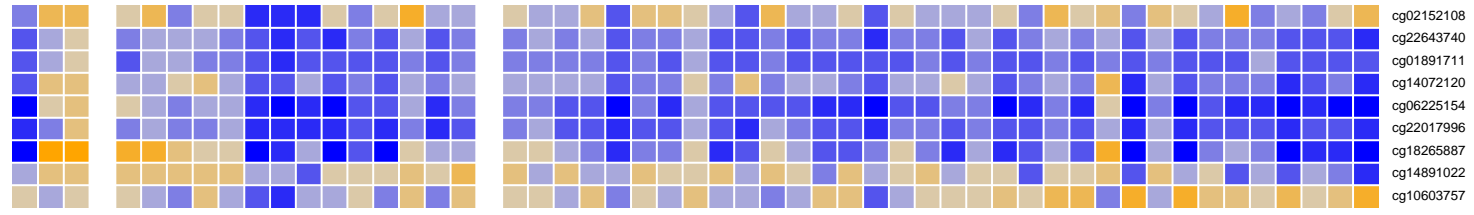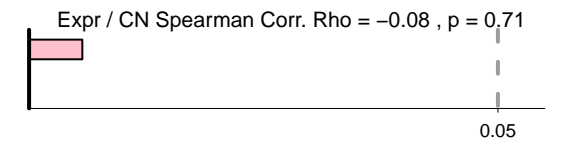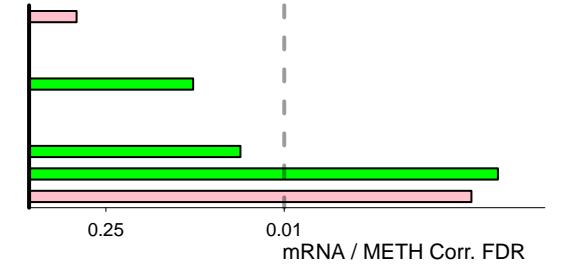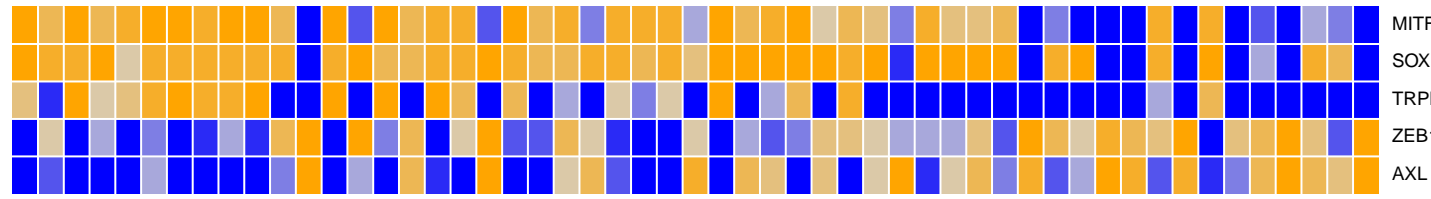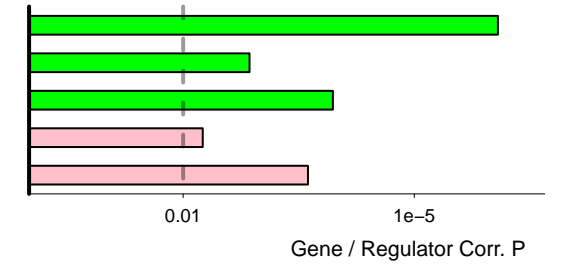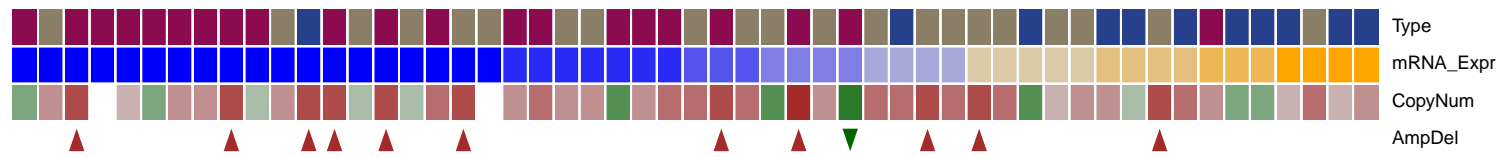

S2279  
 S2333  
 S2391  
 S2667  
 S2357  
 S2320  
 S2374  
 S2510  
 S2216  
 S2521  
 S2380  
 S2125  
 S2408  
 S2495  
 S2765  
 S2423  
 S2330  
 S2596  
 S2350  
 S2406  
 S2761  
 S2381  
 S2654  
 S2668  
 S2373  
 S2189  
 S2800  
 S2400  
 S2410  
 S2097  
 S2718  
 S2365  
 S2379  
 S2767  
 S2731  
 S2734  
 S2812  
 S2153  
 S2392  
 S2261  
 S2645  
 S2549  
 S2688  
 S2338  
 S2247  
 S2470  
 S2508  
 S2686  
 S2583  
 S2356  
 S2650  
 S2405  
 S2770A

# ARHGEF28

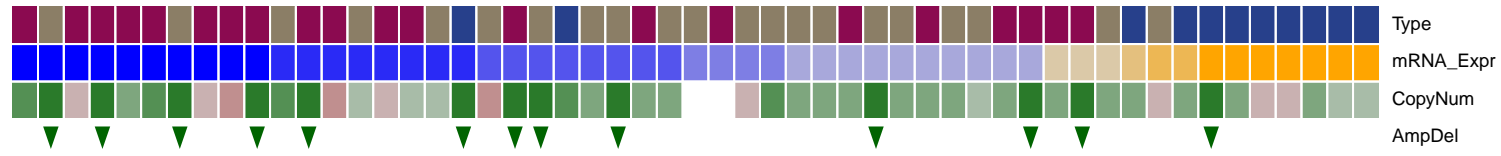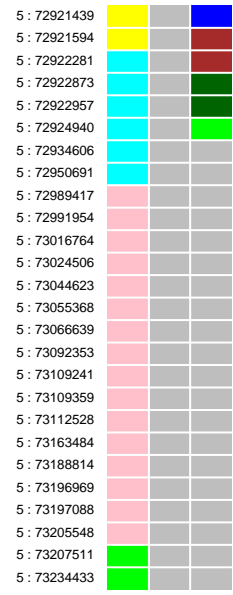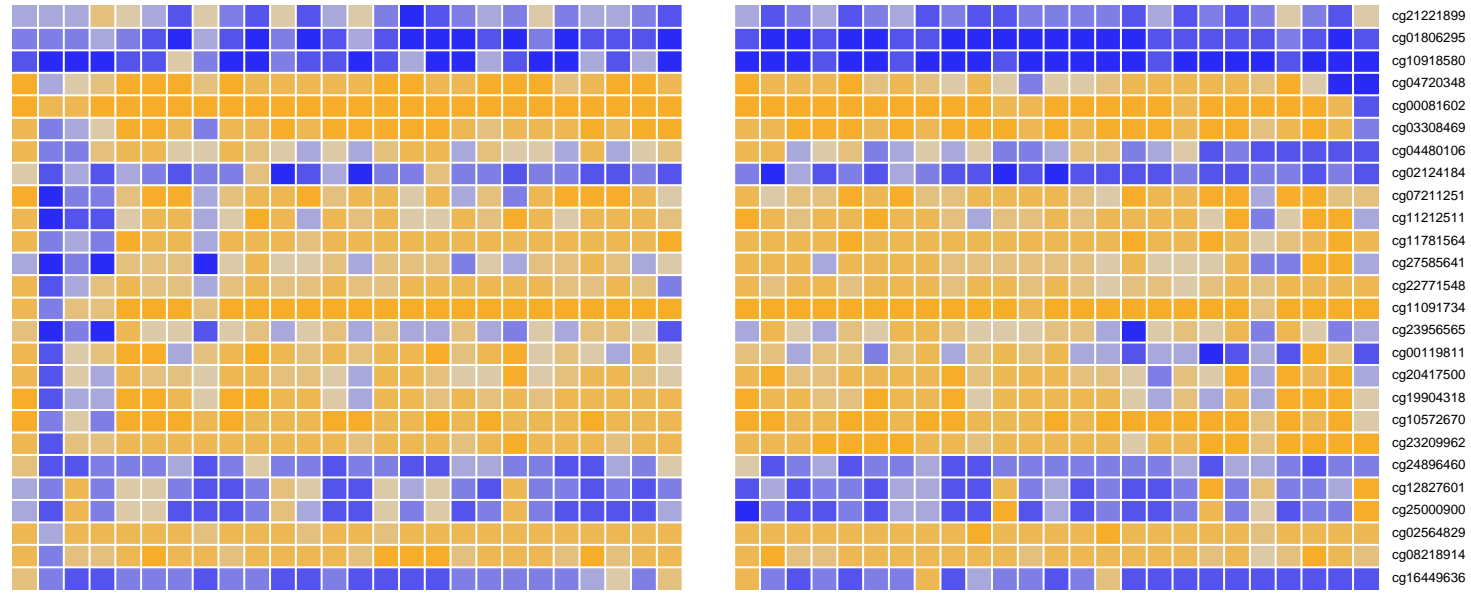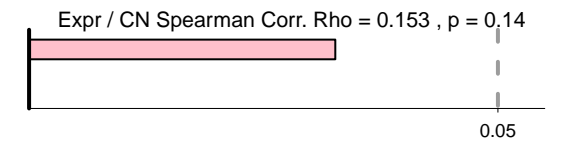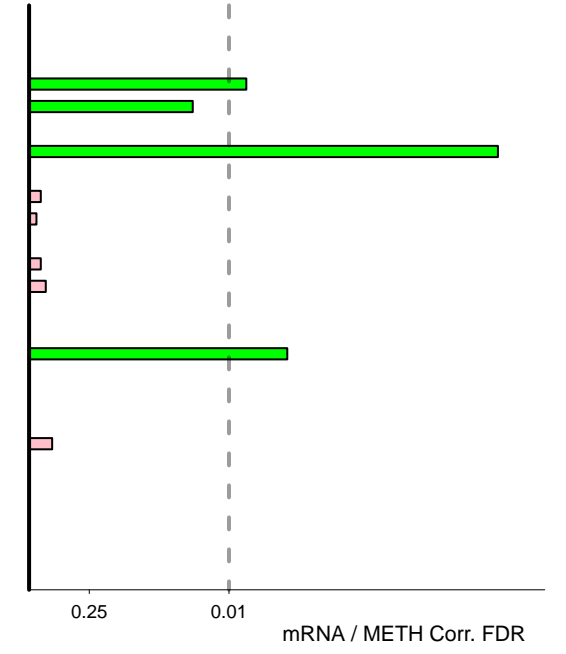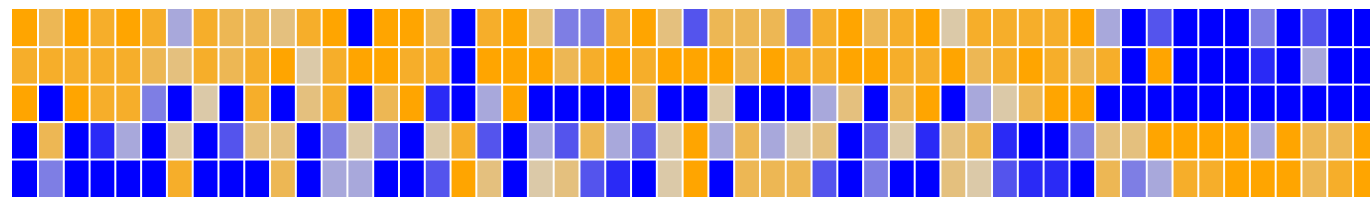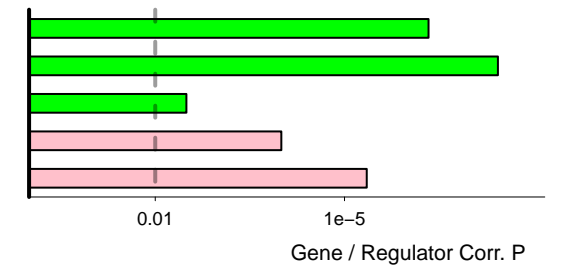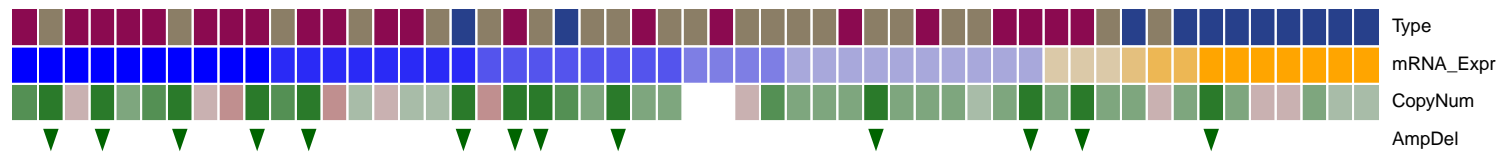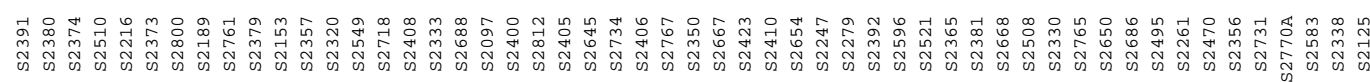

# COL1A1

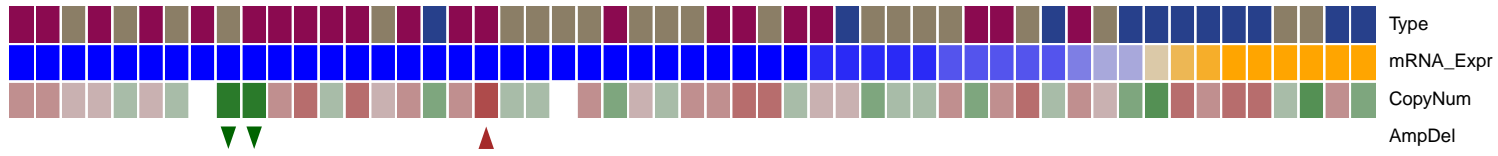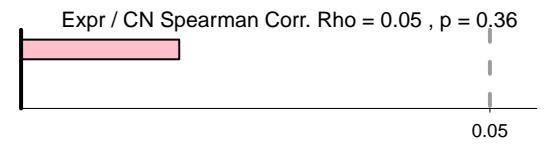

17 : 48280370  
 17 : 48280257  
 17 : 48279265  
 17 : 48279080  
 17 : 48279076  
 17 : 48279072  
 17 : 48279007  
 17 : 48278952  
 17 : 48278927  
 17 : 48278852  
 17 : 48278778  
 17 : 48277216  
 17 : 48277042  
 17 : 48276347  
 17 : 48275919  
 17 : 48275324  
 17 : 48275004  
 17 : 48274189  
 17 : 48273001  
 17 : 48270097  
 17 : 48270089  
 17 : 48270042  
 17 : 48268237  
 17 : 48268233  
 17 : 48267239  
 17 : 48267237  
 17 : 48267144  
 17 : 48267062  
 17 : 48266770  
 17 : 48266593  
 17 : 48266268  
 17 : 48263204  
 17 : 48263198  
 17 : 48263189  
 17 : 48263173  
 17 : 48263159  
 17 : 48263150  
 17 : 48262937  
 17 : 48262067  
 17 : 48260961

GeneLoc  
 PromoterAssoc  
 CpGIsland

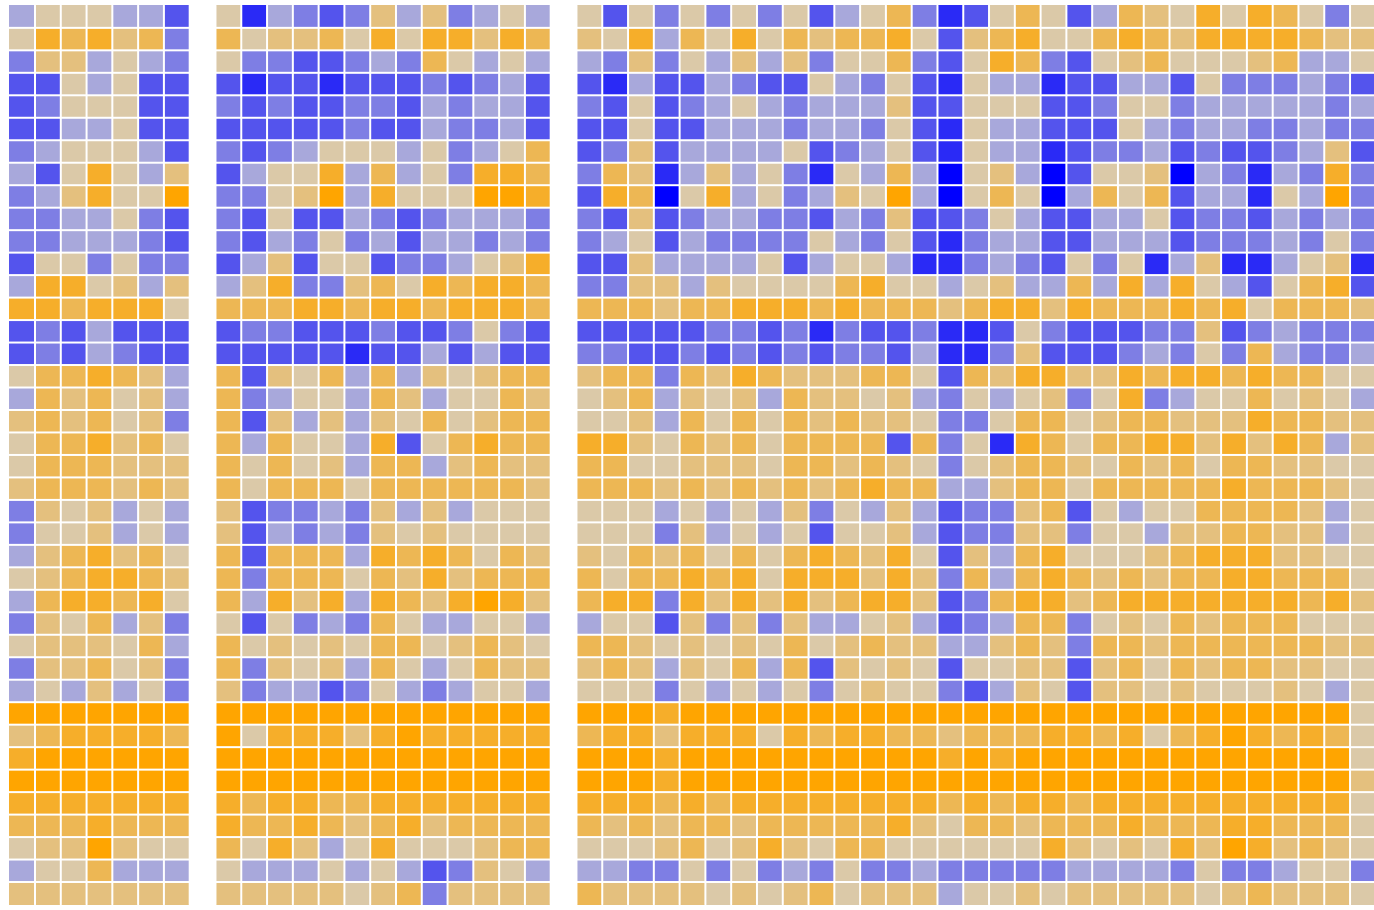

cg02186748  
 cg18008451  
 cg14562086  
 cg12537665  
 cg17219432  
 cg01234133  
 cg00179070  
 cg19052064  
 cg18390610  
 cg16629179  
 cg01593886  
 cg09852920  
 cg01992590  
 cg05302100  
 cg23950157  
 cg18618815  
 cg14832352  
 cg14700325  
 cg16781907  
 cg15435765  
 cg23730606  
 cg18405262  
 cg21847118  
 cg03053980  
 cg02827061  
 cg03799835  
 cg10820084  
 cg00638021  
 cg27604897  
 cg08681473  
 cg25026926  
 cg25735490  
 cg11993636  
 cg11615029  
 cg03743861  
 cg16514513  
 cg00439089  
 cg24540710  
 cg22809726  
 cg02134839

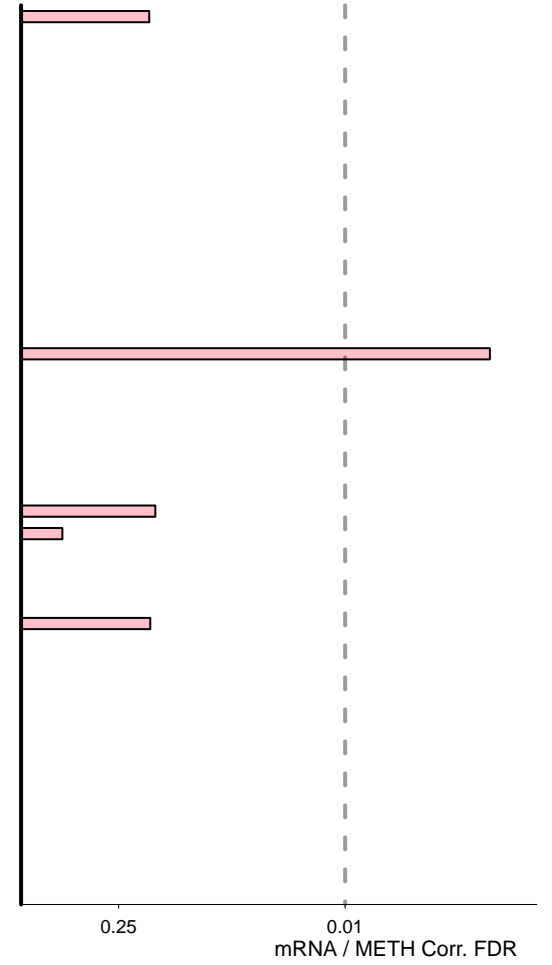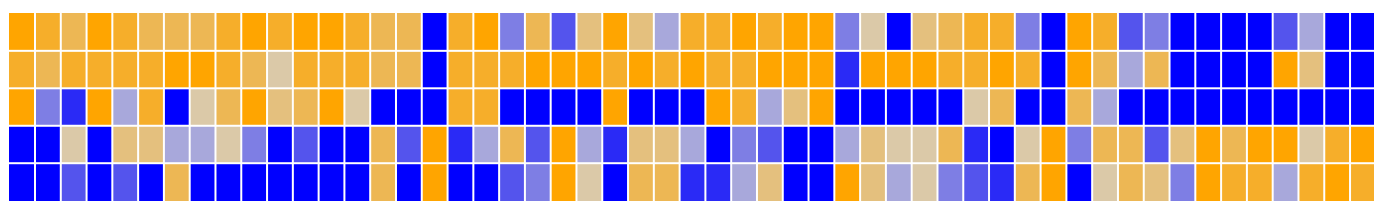

MITF  
 SOX10  
 TRPM1  
 ZEB1  
 AXL

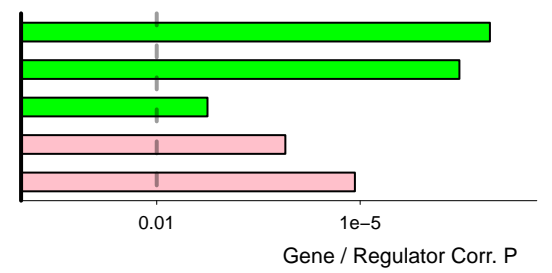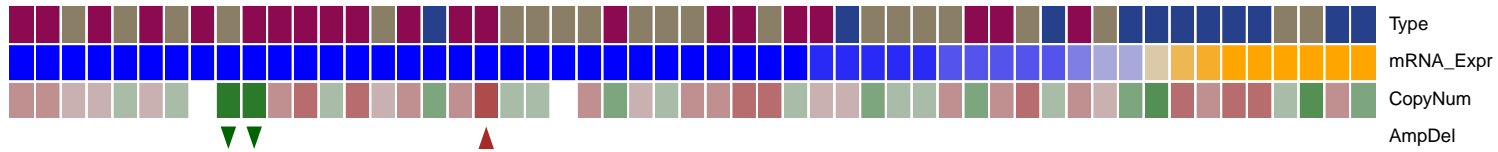

S2374  
 S2373  
 S2333  
 S2391  
 S2247  
 S2379  
 S2410  
 S2667  
 S2596  
 S2765  
 S2357  
 S2406  
 S2408  
 S2189  
 S2423  
 S2761  
 S2770A  
 S2510  
 S2216  
 S2645  
 S2392  
 S2350  
 S2812  
 S2521  
 S2153  
 S2650  
 S2734  
 S2330  
 S2320  
 S2097  
 S2279  
 S2400  
 S2731  
 S2365  
 S2549  
 S2767  
 S2380  
 S2668  
 S2508  
 S2654  
 S2356  
 S2718  
 S2381  
 S2583  
 S2405  
 S2686  
 S2125  
 S2338  
 S2470  
 S2495  
 S2800  
 S2688  
 S2261

# LOX

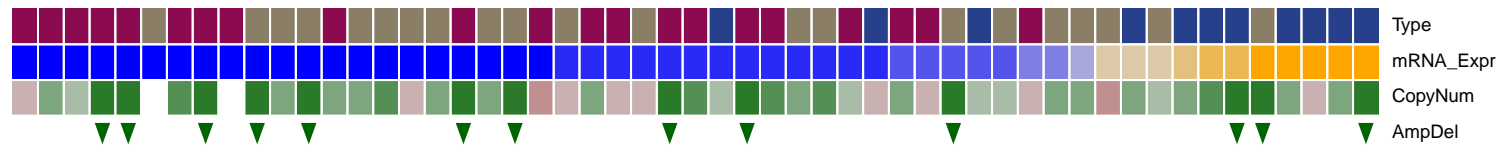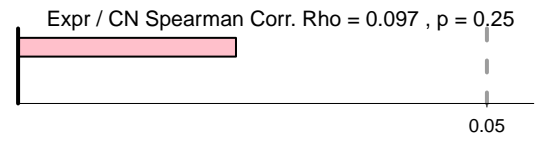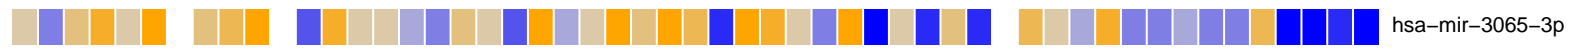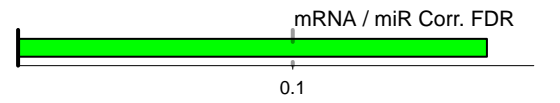

5 : 121415023  
5 : 121414634  
5 : 121414425  
5 : 121414366  
5 : 121414322  
5 : 121414270  
5 : 121414267  
5 : 121414211  
5 : 121414172  
5 : 121414137  
5 : 121414088  
5 : 121414076  
5 : 121414067  
5 : 121414029  
5 : 121414025  
5 : 121413797  
5 : 121413478  
5 : 121413143  
5 : 121413050  
5 : 121412970  
5 : 121412702  
5 : 121412429  
5 : 121412184  
5 : 121408893

GeneLoc  
PromoterAssoc  
CpGIsland

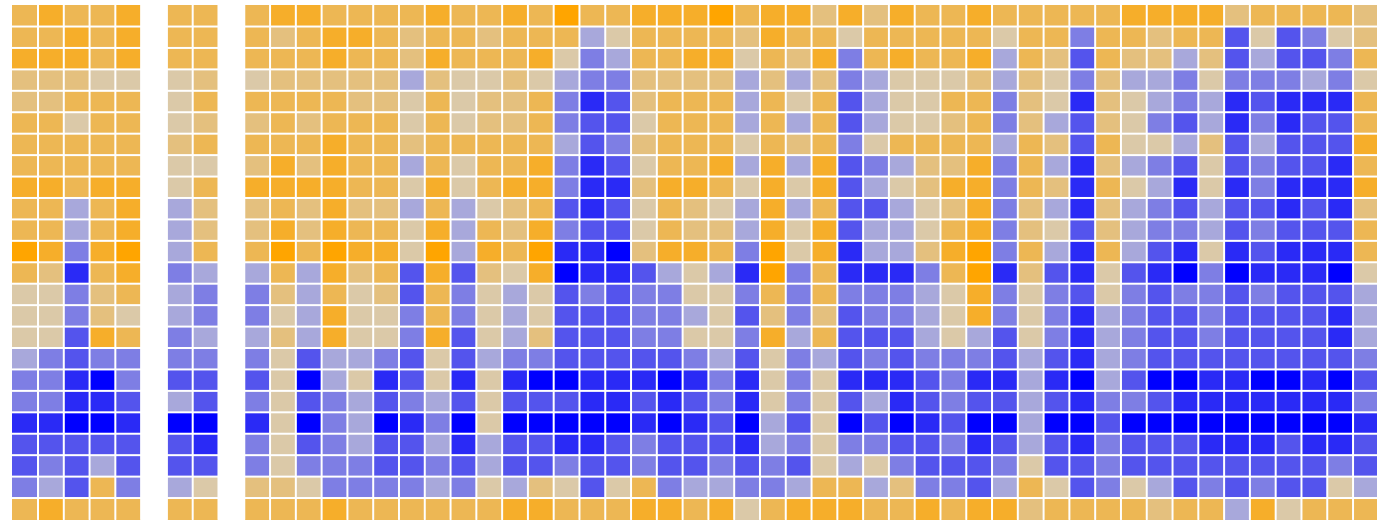

cg15111469  
cg12580445  
cg21215899  
cg21482489  
cg07233159  
cg23913350  
cg08623535  
cg20703137  
cg11960393  
cg26422022  
cg06508445  
cg08920068  
cg16274199  
cg09499414  
cg03619973  
cg01429321  
cg01824804  
cg08431704  
cg02548238  
cg23352712  
cg22836153  
cg09262269  
cg05256605  
cg0191064

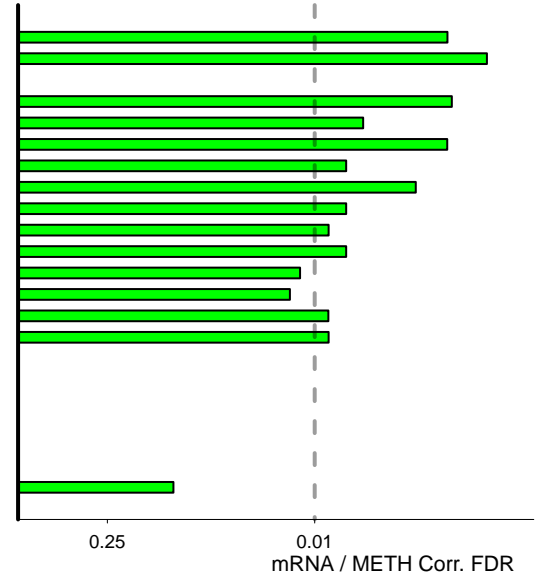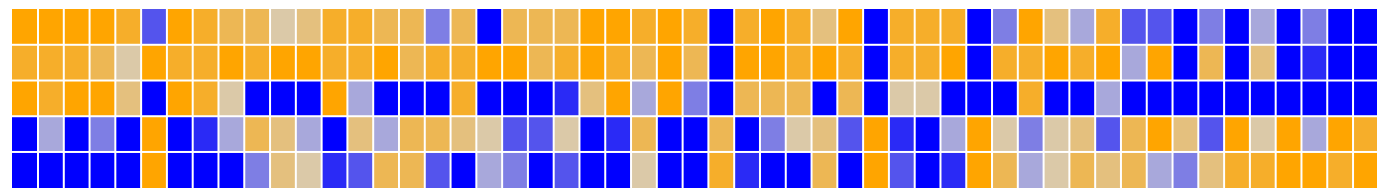

MITF  
SOX10  
TRPM1  
ZEB1  
AXL

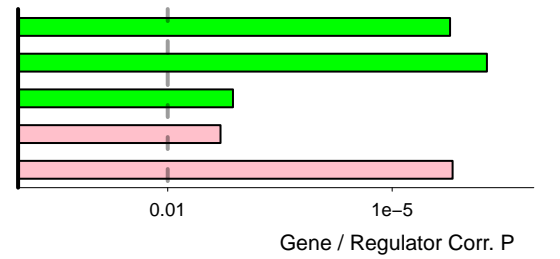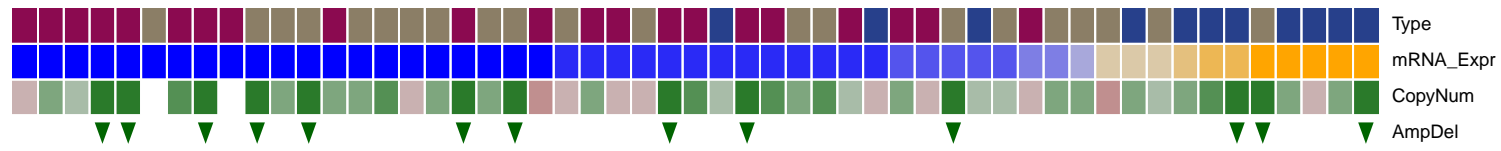

S2374  
S2216  
S2408  
S2765  
S2357  
S2350  
S2391  
S2510  
S2667  
S2380  
S2365  
S2812  
S2330  
S2247  
S2410  
S2423  
S2645  
S2379  
S2549  
S2392  
S2761  
S2333  
S2279  
S2521  
S2381  
S2400  
S2373  
S2338  
S2508  
S2718  
S2596  
S2153  
S2406  
S2770A  
S2668  
S2189  
S2734  
S2125  
S2654  
S2320  
S2767  
S2650  
S2097  
S2583  
S2495  
S2686  
S2405  
S2470  
S2800  
S2356  
S2731  
S2261  
S2688

# FGF5

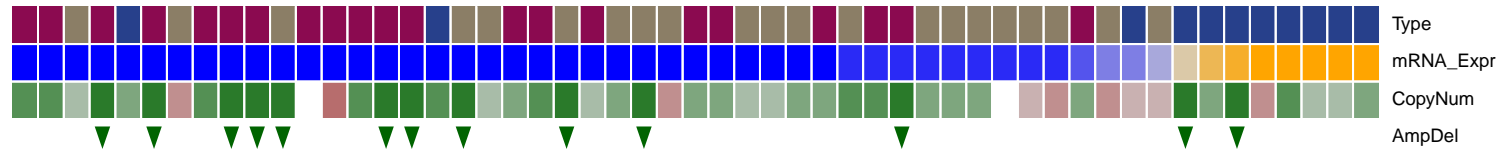

4 : 81185765  
 4 : 81186795  
 4 : 81186901  
 4 : 81187011  
 4 : 81187198  
 4 : 81187601  
 4 : 81187605  
 4 : 81187610  
 4 : 81187798  
 4 : 81188405  
 4 : 81188471  
 4 : 81189706  
 4 : 81189774  
 4 : 81189927  
 4 : 81207949  
 4 : 81243757  
 4 : 81254292  
 4 : 81256552  
 4 : 81256704  
 4 : 81256719  
 4 : 81256889  
 4 : 81256999  
 4 : 81257041  
 4 : 81257211  
 4 : 81257269  
 4 : 81257828

GeneLoc  
 PromoterAssoc  
 CpGIsland

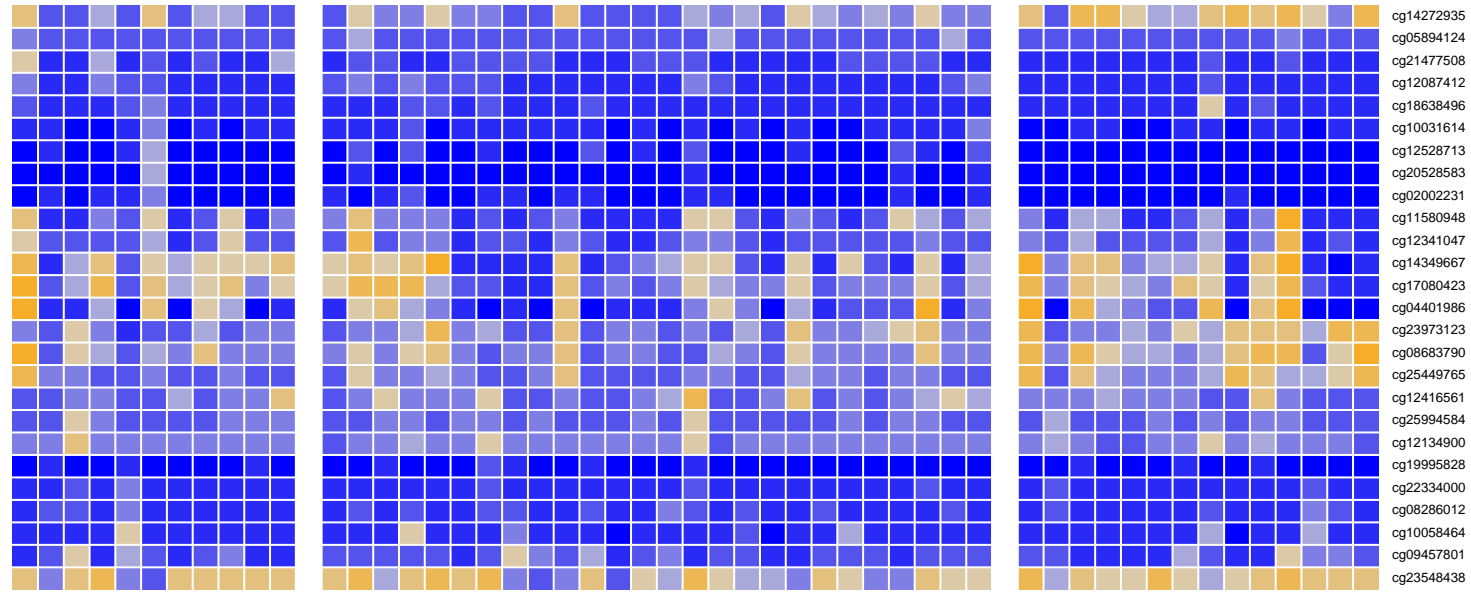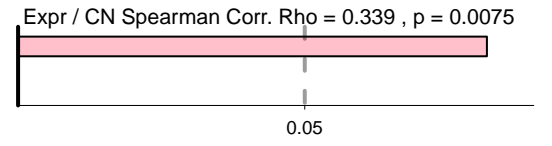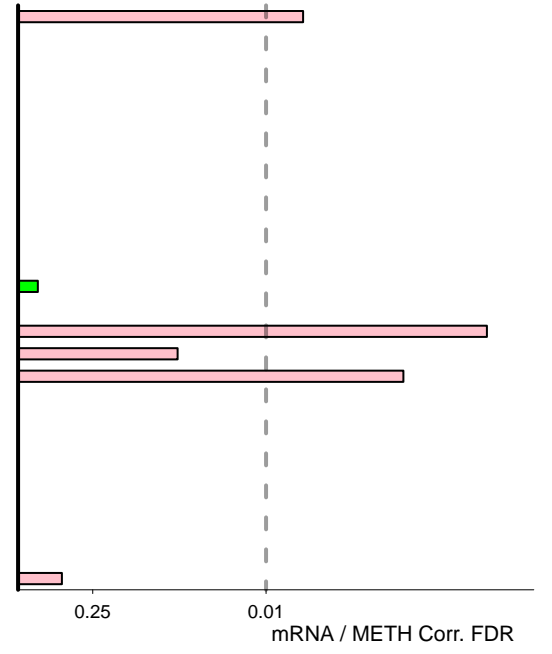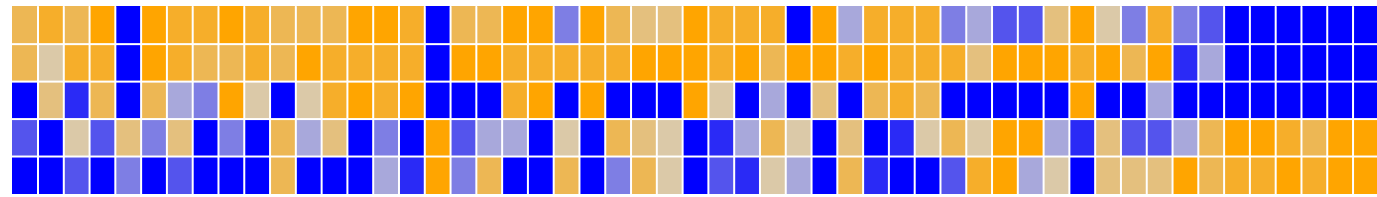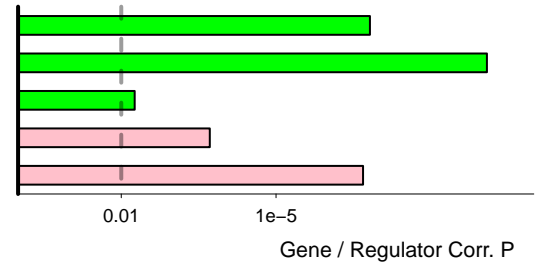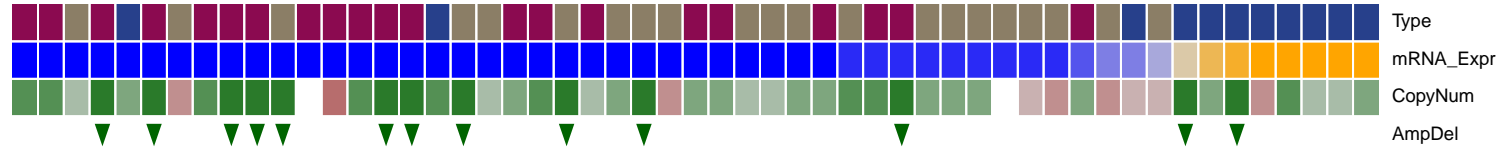

S2761  
 S2357  
 S2333  
 S2406  
 S2686  
 S2718  
 S2247  
 S2373  
 S2765  
 S2189  
 S2423  
 S2667  
 S2379  
 S2391  
 S2320  
 S2330  
 S2770A  
 S2392  
 S2410  
 S2216  
 S2374  
 S2654  
 S2408  
 S2380  
 S2153  
 S2767  
 S2400  
 S2668  
 S2734  
 S2381  
 S2549  
 S2279  
 S2650  
 S2508  
 S2510  
 S2596  
 S2645  
 S2800  
 S2350  
 S2495  
 S2812  
 S2521  
 S2365  
 S2405  
 S2097  
 S2731  
 S2583  
 S2470  
 S2261  
 S2688  
 S2338  
 S2125  
 S2356

# LRIG1

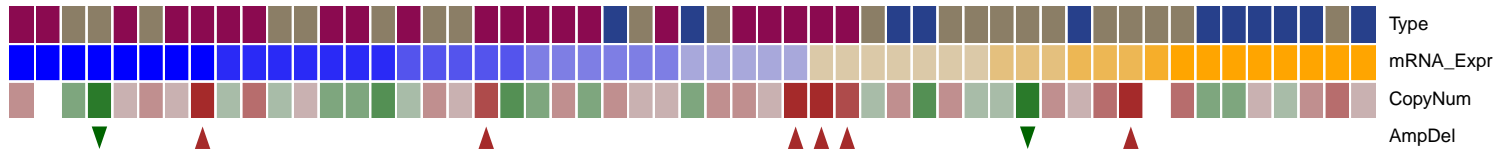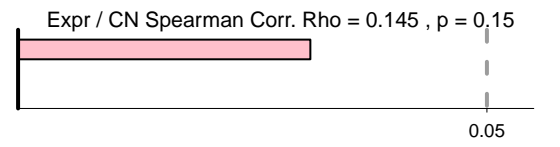

3 : 66550922  
 3 : 66550918  
 3 : 66550735  
 3 : 66549732  
 3 : 66548117  
 3 : 66543263  
 3 : 66535344  
 3 : 66534050  
 3 : 66533056  
 3 : 66527285  
 3 : 66519998  
 3 : 66514413  
 3 : 66513559  
 3 : 66504370  
 3 : 66500703  
 3 : 66492992  
 3 : 66491863  
 3 : 66489362  
 3 : 66487501  
 3 : 66482980  
 3 : 66481913  
 3 : 66475150  
 3 : 66468921  
 3 : 66463731  
 3 : 66458970  
 3 : 66456600  
 3 : 66455738  
 3 : 66455638  
 3 : 66454856  
 3 : 66454763  
 3 : 66448589  
 3 : 66446342  
 3 : 66444122  
 3 : 66437456  
 3 : 66433521  
 3 : 66431055

GeneLoc  
 PromoterAssoc  
 CpGIsland

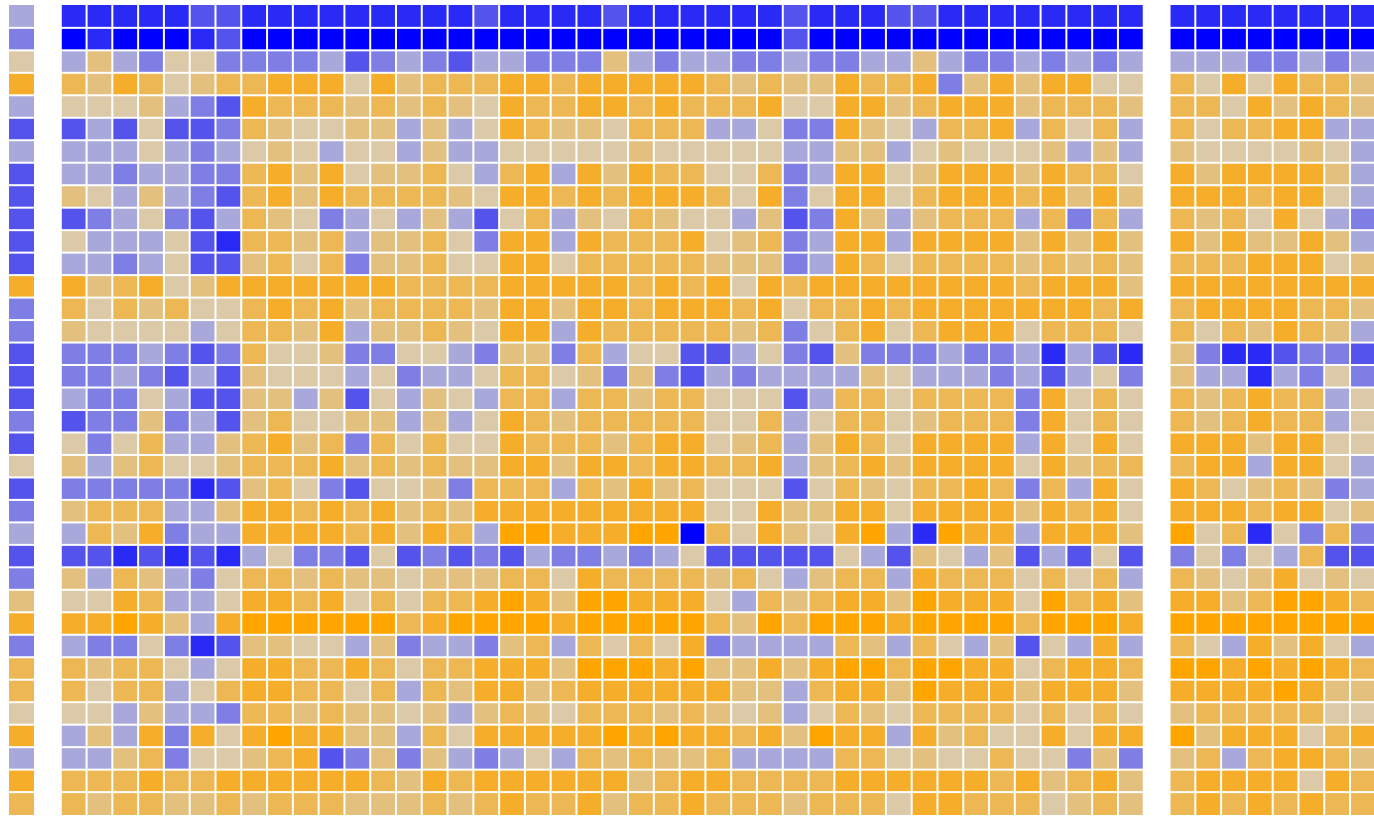

cg13895544  
 cg12249227  
 cg26131019  
 cg06096184  
 cg11198596  
 cg24150385  
 cg08880904  
 cg06189394  
 cg13450944  
 cg25230917  
 cg09716921  
 cg25742035  
 cg12827946  
 cg25111284  
 cg05543520  
 cg02012974  
 cg09406856  
 cg05526341  
 cg00513100  
 cg13919137  
 cg00244854  
 cg16931822  
 cg21621104  
 cg18005280  
 cg02735530  
 cg05972059  
 cg13496790  
 cg17247149  
 cg26053346  
 cg21385480  
 cg04560545  
 cg22055337  
 cg00225902  
 cg15035590  
 cg15724417  
 cg00503690

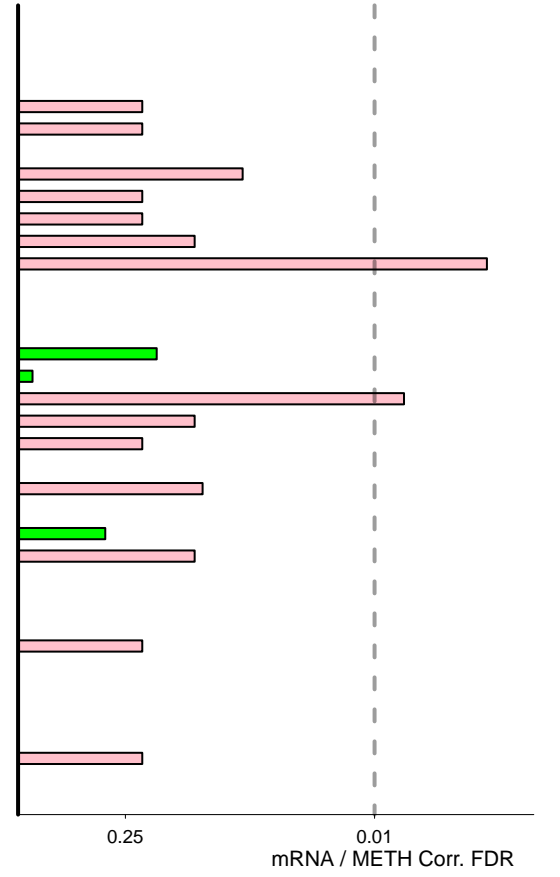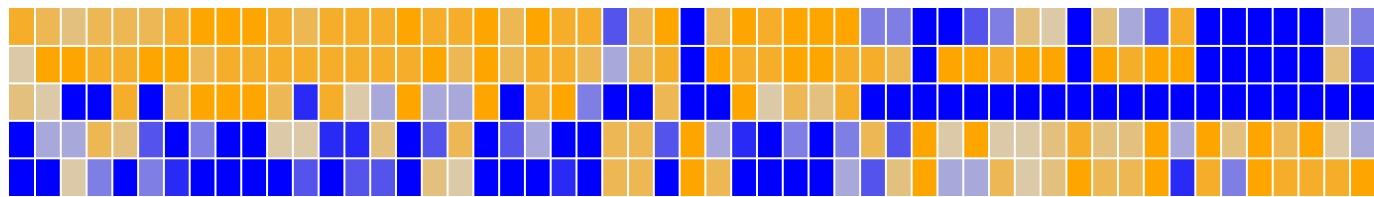

MITF  
 SOX10  
 TRPM1  
 ZEB1  
 AXL

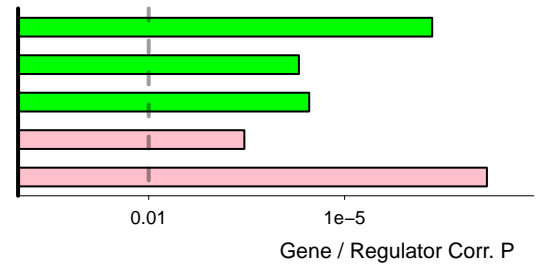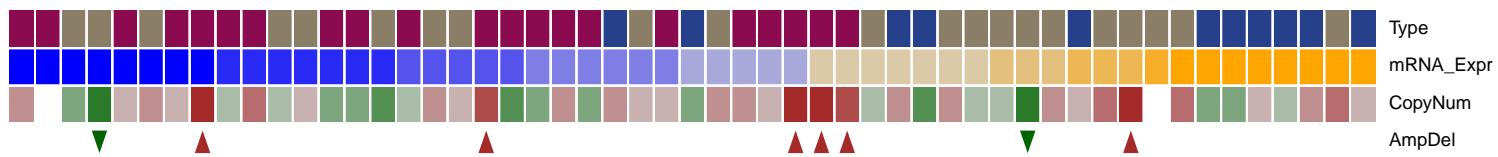

S2357  
 S2667  
 S2812  
 S2380  
 S2379  
 S2392  
 S2508  
 S2765  
 S2408  
 S2391  
 S2596  
 S2333  
 S2510  
 S2668  
 S2247  
 S2374  
 S2097  
 S2381  
 S2400  
 S2761  
 S2216  
 S2330  
 S2373  
 S2583  
 S2423  
 S2406  
 S2356  
 S2410  
 S2521  
 S2189  
 S2718  
 S2279  
 S2320  
 S2645  
 S2405  
 S2770A  
 S2549  
 S2495  
 S2654  
 S2767  
 S2365  
 S2688  
 S2153  
 S2650  
 S2350  
 S2734  
 S2261  
 S2686  
 S2125  
 S2338  
 S2470  
 S2800  
 S2731

# SLC38A1

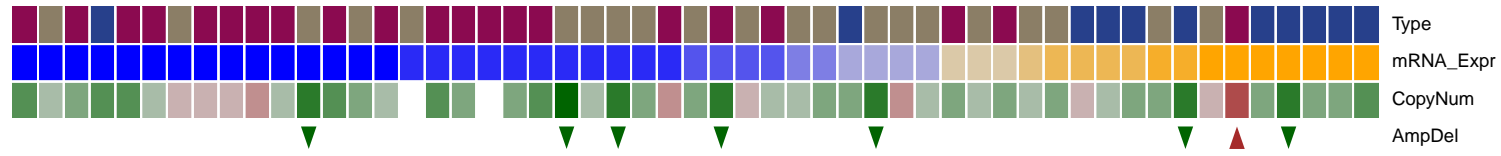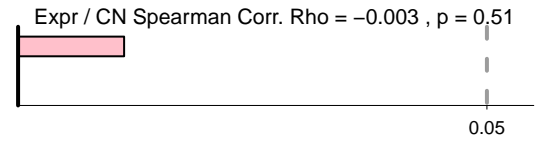

12:46664096  
12:46663694  
12:46663660  
12:46663407  
12:46663361  
12:46663281  
12:46663274  
12:46663270  
12:46662932  
12:46662743  
12:46662421  
12:46661718  
12:46661305  
12:46660819  
12:46660749  
12:46657338  
12:46654629  
12:46637975  
12:46614854  
12:46609063  
12:46599935  
12:46599925  
12:46599923  
12:46581199  
12:46579352

GeneLoc  
PromoterAssoc  
CpGIsland

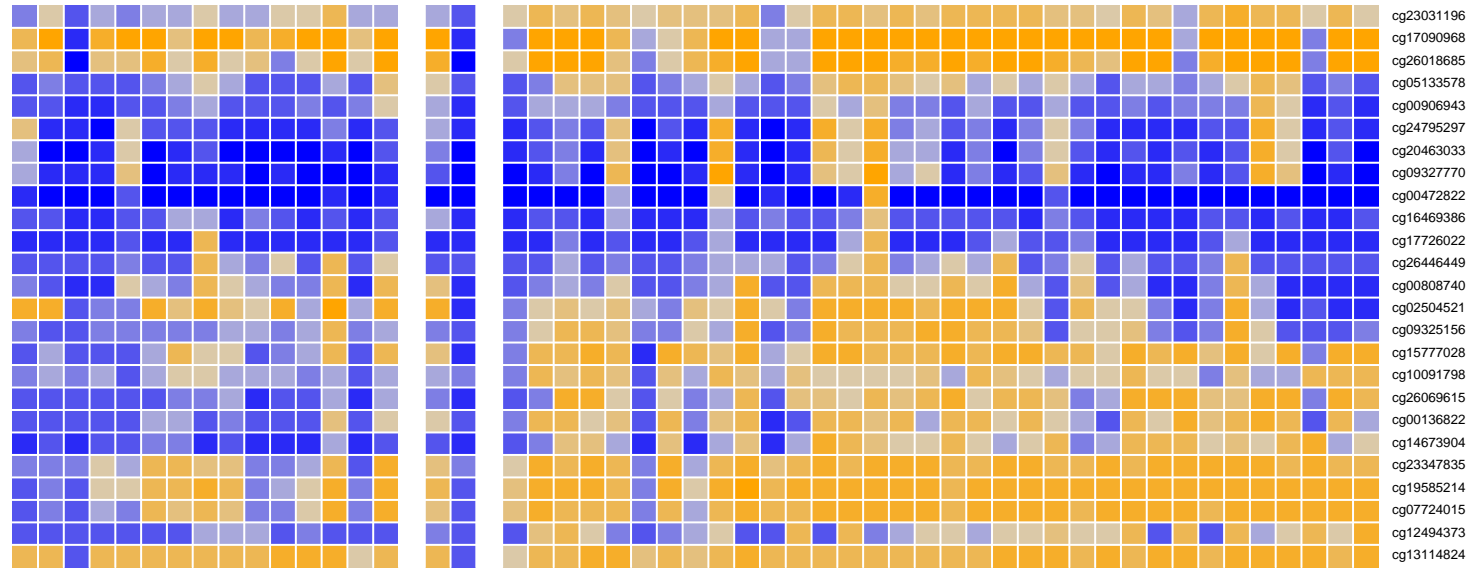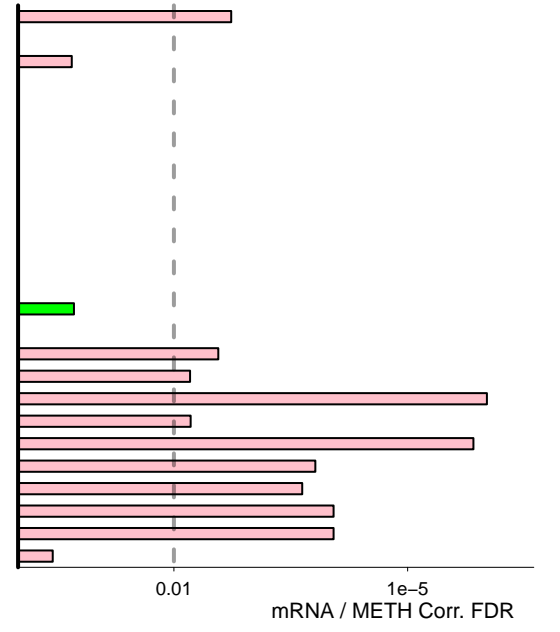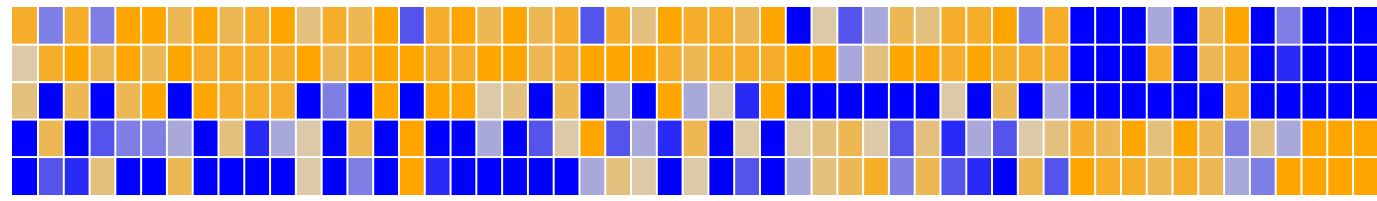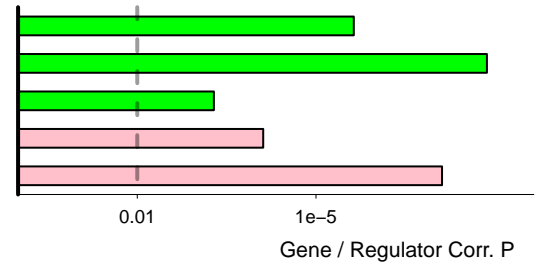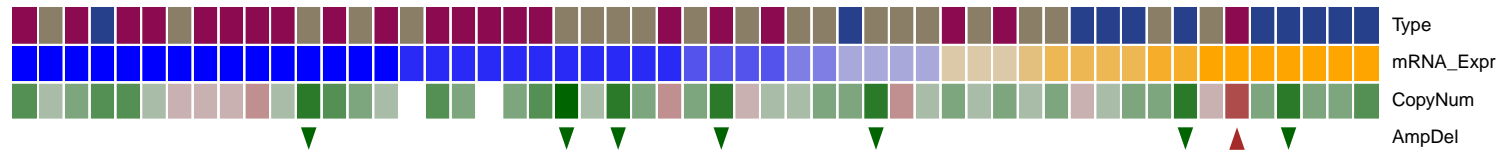

S2357  
S2645  
S2508  
S2405  
S2718  
S2765  
S2410  
S2391  
S2379  
S2510  
S2216  
S2767  
S2373  
S2380  
S2400  
S2350  
S2330  
S2374  
S2667  
S2279  
S2761  
S2596  
S2495  
S2097  
S2812  
S2521  
S2381  
S2189  
S2333  
S2408  
S2365  
S2549  
S2383  
S2800  
S2392  
S2153  
S2668  
S2734  
S2406  
S2654  
S2247  
S2688  
S2338  
S2261  
S2650  
S2470  
S2423  
S2320  
S2686  
S2731  
S2125  
S2356  
S2770A



# CITED2

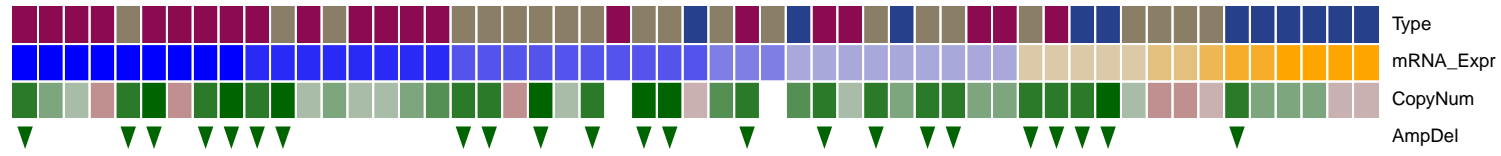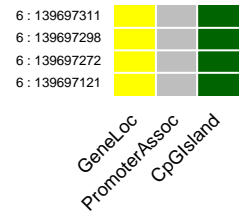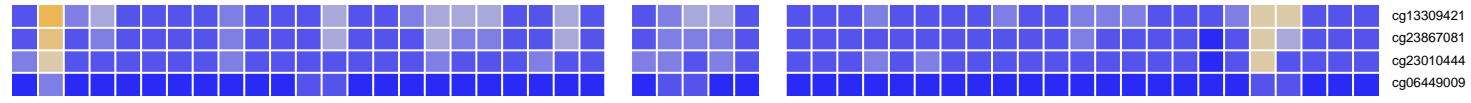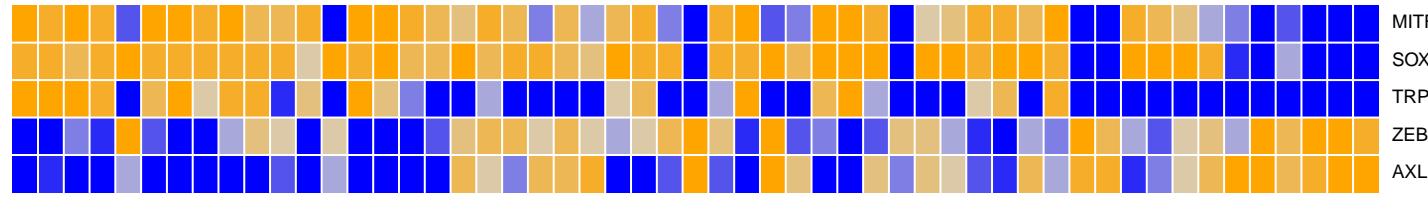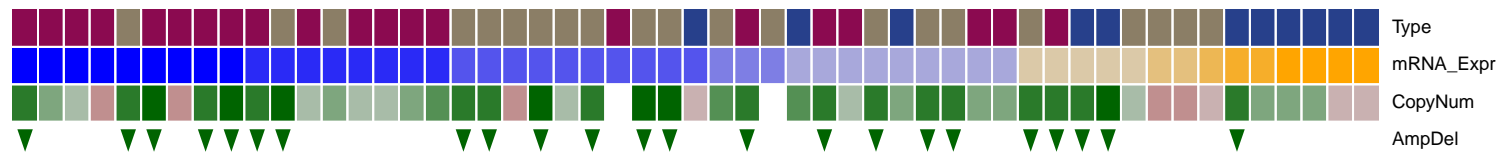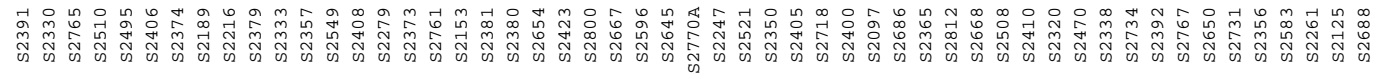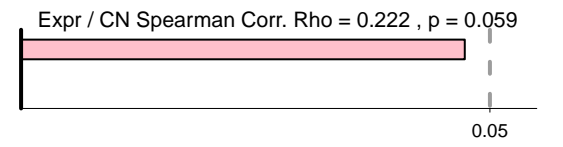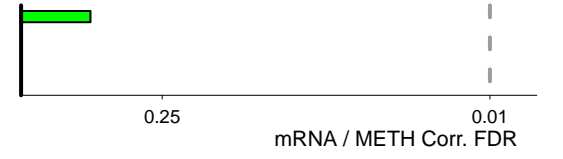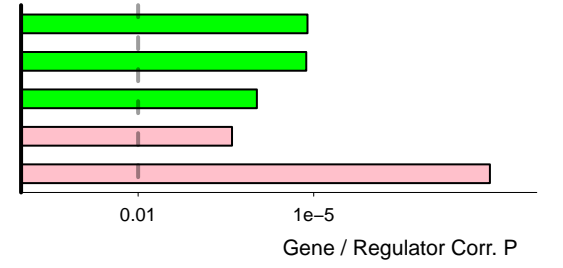

# PDE1C

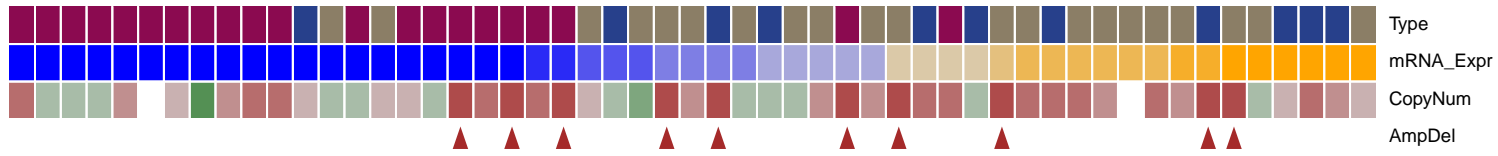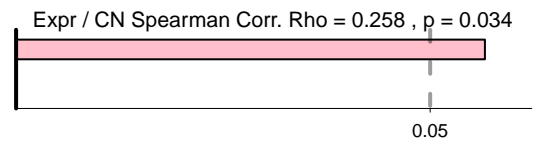

7 : 32339497  
7 : 32339457  
7 : 32339095  
7 : 32338569  
7 : 32338542  
7 : 32338240  
7 : 32338150  
7 : 32337188  
7 : 32336585  
7 : 32336173  
7 : 32334483  
7 : 32307671  
7 : 32299702  
7 : 32183060  
7 : 32114197  
7 : 32111453  
7 : 32111342  
7 : 32111237  
7 : 32111068  
7 : 32111066  
7 : 32111062  
7 : 32111001  
7 : 32110988  
7 : 32110650  
7 : 32110636  
7 : 32110523  
7 : 32110239  
7 : 32110145  
7 : 32109997  
7 : 32109831  
7 : 32106580  
7 : 32099501  
7 : 32091043  
7 : 32059706  
7 : 32038956  
7 : 31980400  
7 : 31935390  
7 : 31850782  
7 : 31827390

GeneLoc  
PromoterAssoc  
CpGIsland

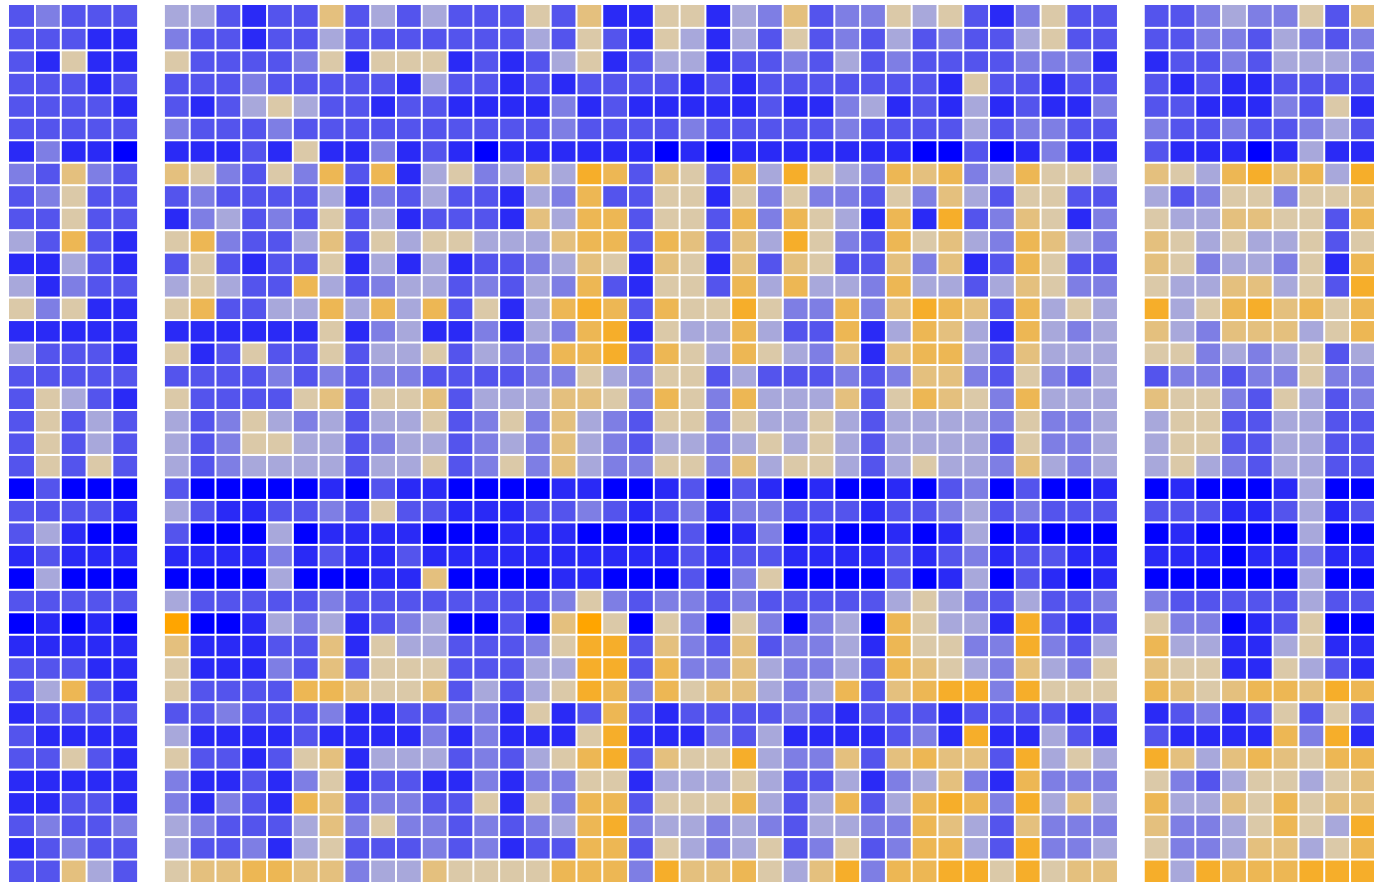

cg16888547  
cg20110742  
cg19663246  
cg16719466  
cg11321433  
cg03876413  
cg14369398  
cg17382888  
cg08036399  
cg06577876  
cg24979513  
cg00327544  
cg07025011  
cg05017646  
cg16988656  
cg17169397  
cg14465747  
cg21530649  
cg11933094  
cg16903225  
cg00546491  
cg10889138  
cg22131691  
cg15988350  
cg09198448  
cg14604568  
cg04011182  
cg02914422  
cg05512100  
cg19763428  
cg22541336  
cg05090785  
cg25210884  
cg04451579  
cg13298997  
cg18699226  
cg08688636  
cg03530393  
cg25815219

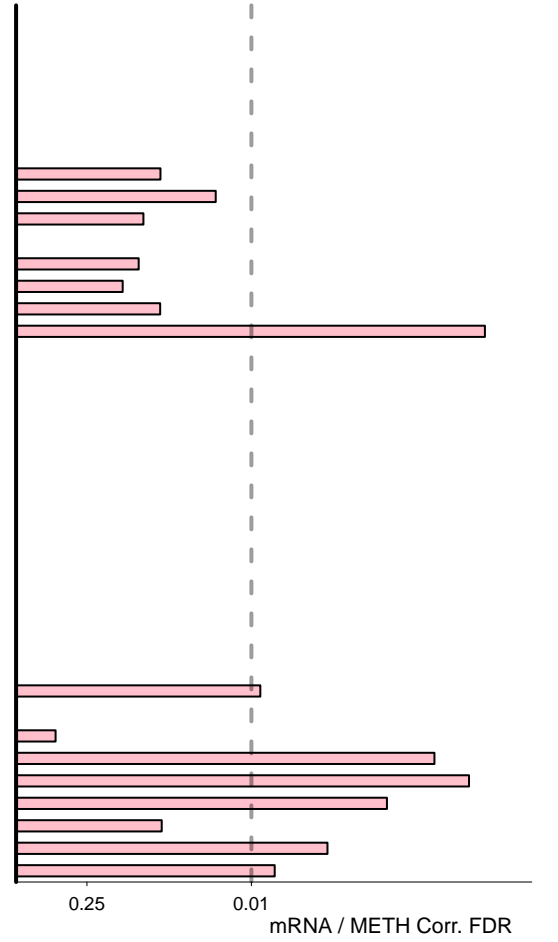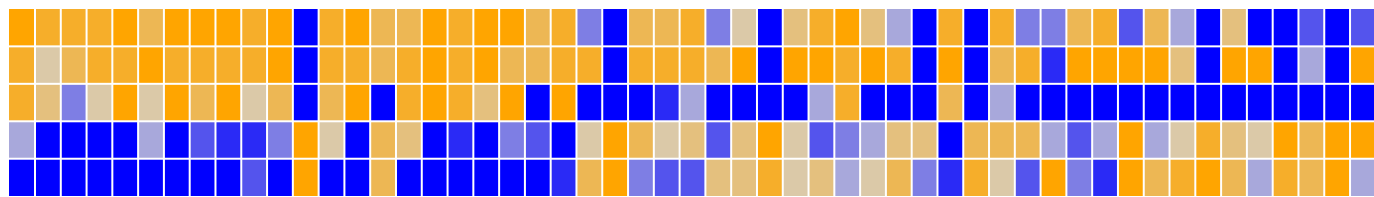

MITF  
SOX10  
TRPM1  
ZEB1  
AXL

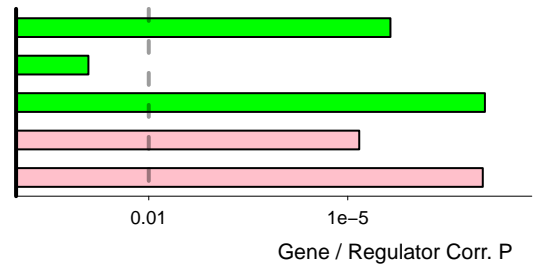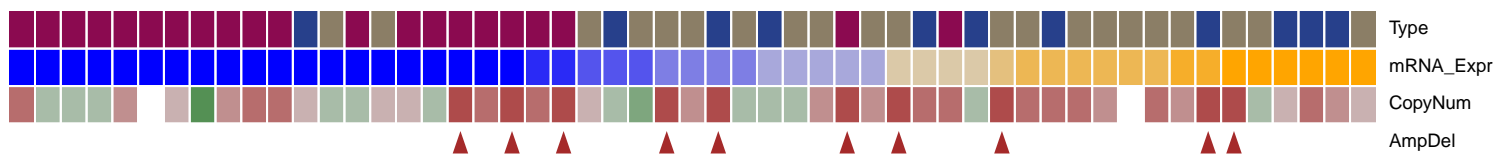

S2216  
S2357  
S2373  
S2189  
S2374  
S2667  
S2391  
S2406  
S2521  
S2668  
S2718  
S2770A  
S2596  
S2408  
S2423  
S2379  
S2400  
S2510  
S2279  
S2765  
S2761  
S2330  
S2654  
S2356  
S2380  
S2333  
S2247  
S2405  
S2365  
S2470  
S2767  
S2097  
S2320  
S2612  
S2650  
S2686  
S2508  
S2338  
S2381  
S2645  
S2731  
S2392  
S2734  
S2350  
S2410  
S2600  
S2688  
S2153  
S2549  
S2261  
S2583  
S2125  
S2495

# CDH2

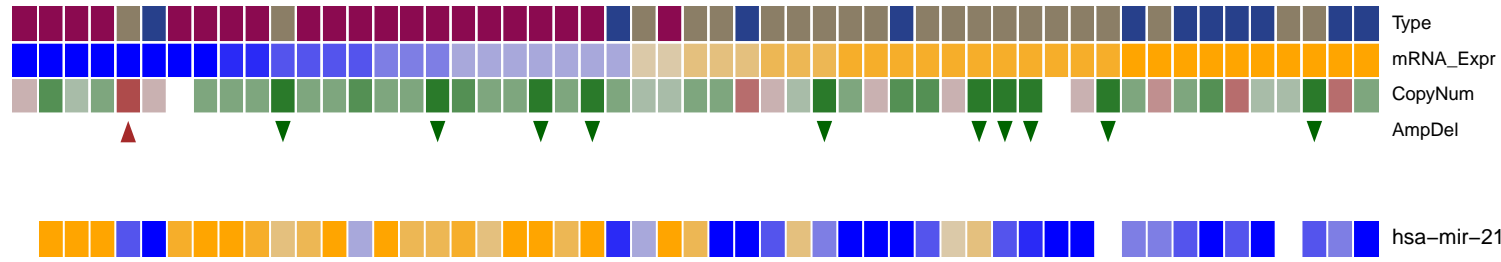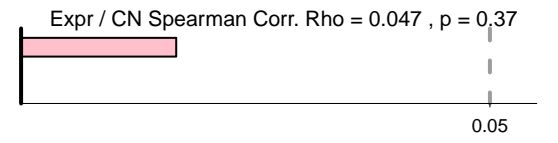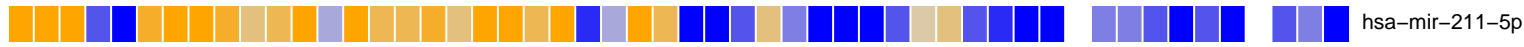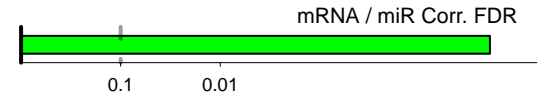

18 : 25758430  
18 : 25758159  
18 : 25757710  
18 : 25757555  
18 : 25757438  
18 : 25757202  
18 : 25756657  
18 : 25756333  
18 : 25755942  
18 : 25755847  
18 : 25755641  
18 : 25755608  
18 : 25755311  
18 : 25754857  
18 : 25754301  
18 : 2572674  
18 : 2572657  
18 : 2572639  
18 : 2570209  
18 : 2570145

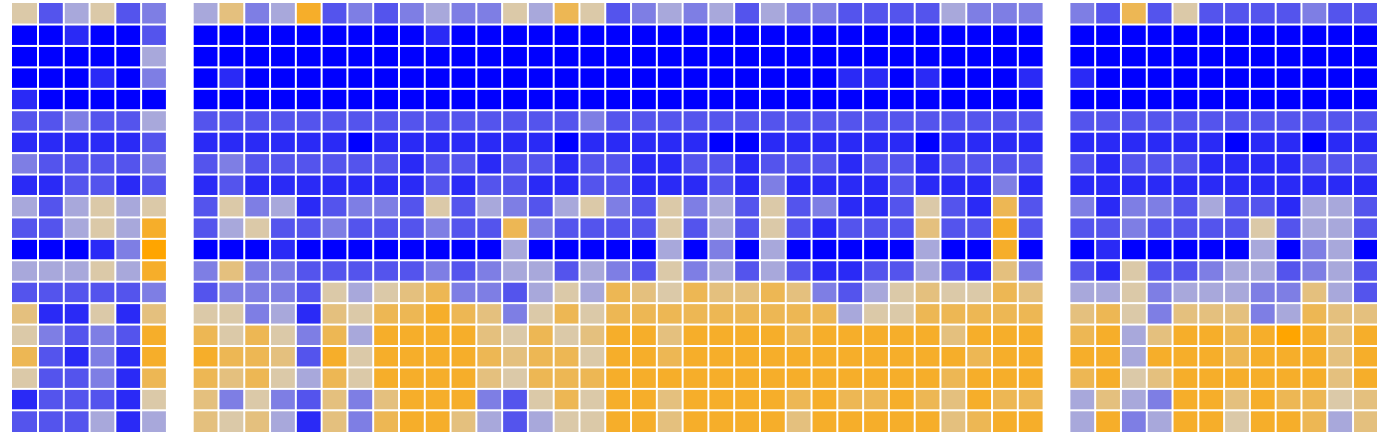

cg12169536  
cg02840109  
cg14312538  
cg06090660  
cg12208258  
cg13464915  
cg18171240  
cg13845439  
cg07635747  
cg02935338  
cg15698842  
cg27593384  
cg22322343  
cg22332722  
cg11963233  
cg13269527  
cg24776465  
cg07775293  
cg00964963  
cg27105619

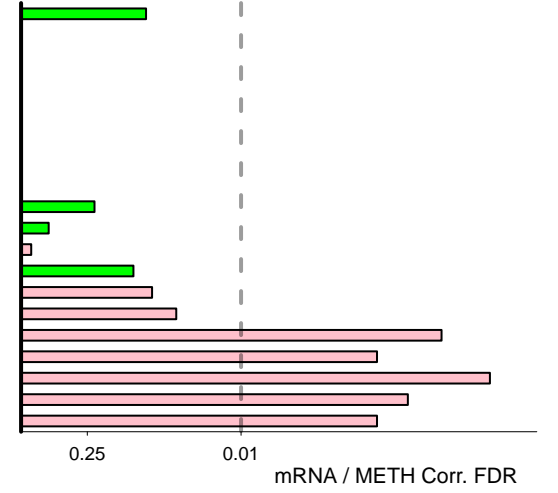

GeneLoc  
PromoterAssoc  
CpIsland

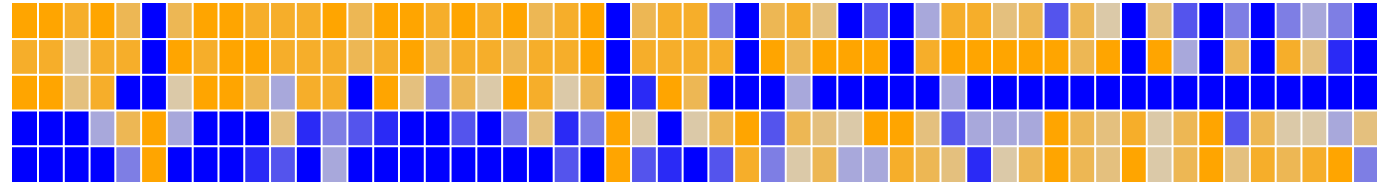

MITF  
SOX10  
TRPM1  
ZEB1  
AXL

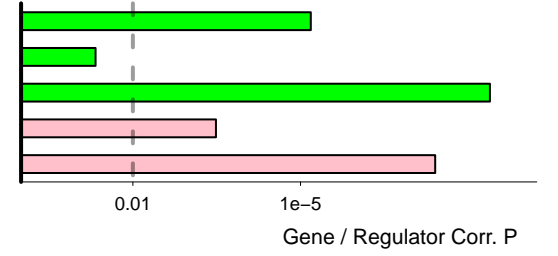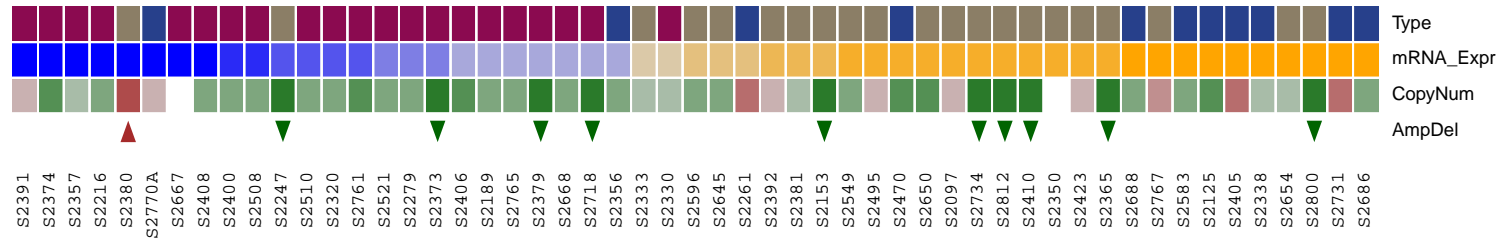

S2391  
S2374  
S2357  
S2216  
S2380  
S2770A  
S2667  
S2408  
S2400  
S2508  
S2247  
S2510  
S2320  
S2761  
S2521  
S2279  
S2373  
S2406  
S2189  
S2765  
S2379  
S2668  
S2718  
S2356  
S2333  
S2330  
S2596  
S2645  
S2261  
S2392  
S2381  
S2153  
S2549  
S2495  
S2470  
S2650  
S2097  
S2734  
S2812  
S2410  
S2350  
S2423  
S2365  
S2688  
S2767  
S2583  
S2125  
S2405  
S2338  
S2654  
S2800  
S2731  
S2686

# RGS4

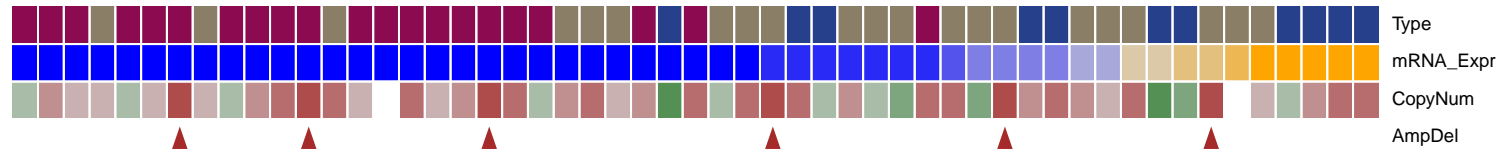

1:163037105  
 1:163037784  
 1:163038703  
 1:163039012  
 1:163039155  
 1:163039184  
 1:163041039  
 1:163041702  
 1:163044231  
 1:163046549

GeneLoc  
 PromoterAssoc  
 CpGIsland

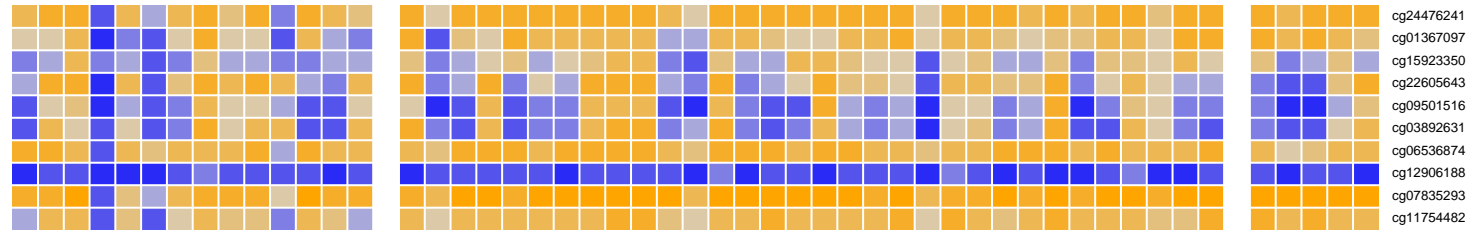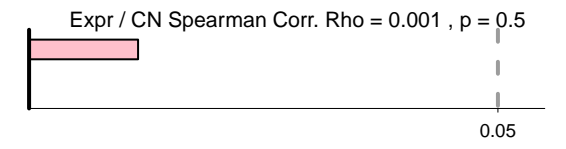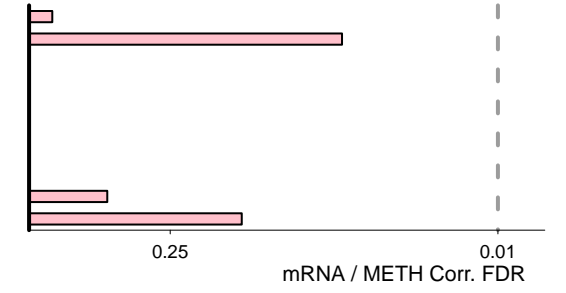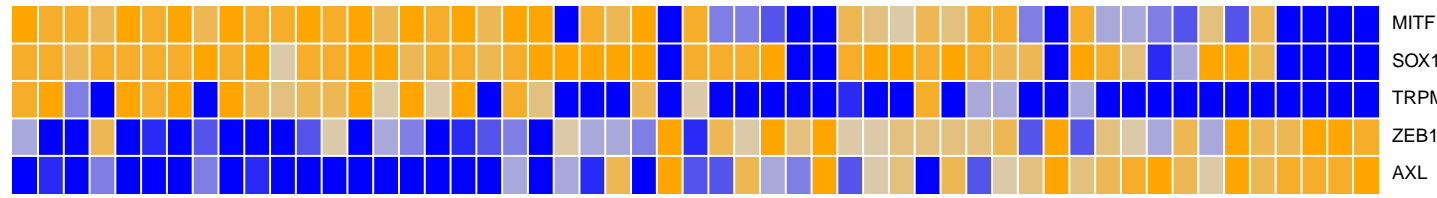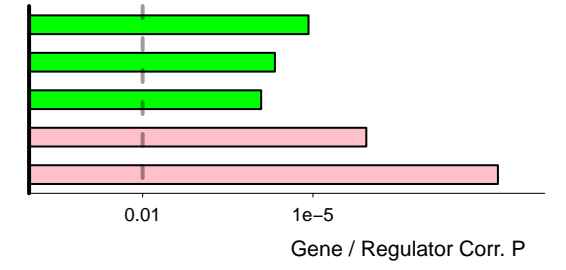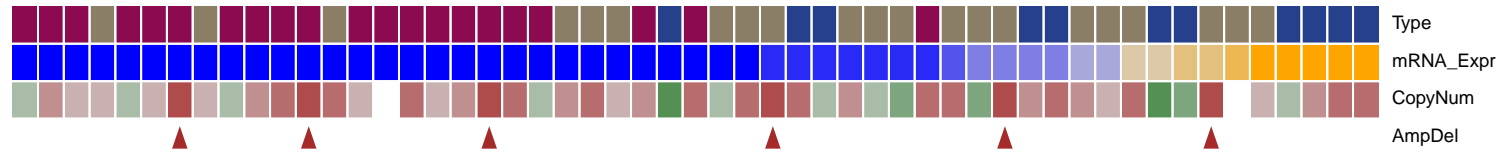

S2216  
 S2330  
 S2373  
 S2380  
 S2391  
 S2510  
 S2374  
 S2392  
 S2408  
 S2508  
 S2357  
 S2406  
 S2596  
 S2400  
 S2667  
 S2765  
 S2189  
 S2521  
 S2761  
 S2320  
 S2279  
 S2549  
 S2734  
 S2410  
 S2718  
 S2770A  
 S2668  
 S2645  
 S2654  
 S2495  
 S2686  
 S2356  
 S2333  
 S2767  
 S2365  
 S2379  
 S2153  
 S2247  
 S2381  
 S2405  
 S2125  
 S2097  
 S2650  
 S2800  
 S2731  
 S2583  
 S2812  
 S2350  
 S2423  
 S2338  
 S2470  
 S2261  
 S2688

# EHD2

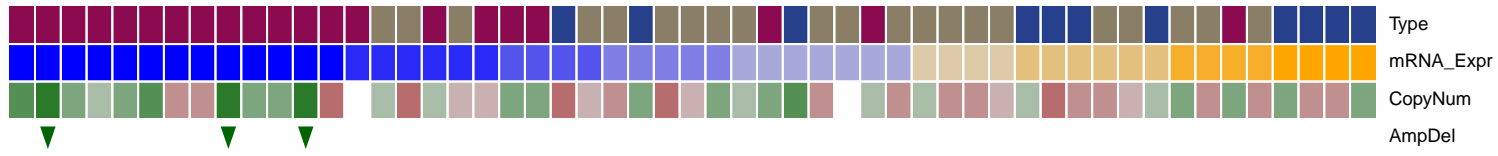

19 : 48215149  
 19 : 48216390  
 19 : 48216402  
 19 : 48216502  
 19 : 48216813  
 19 : 48217675  
 19 : 48219029  
 19 : 48219924  
 19 : 48220075  
 19 : 48228470  
 19 : 48231499  
 19 : 48232106  
 19 : 48232988  
 19 : 48244319  
 19 : 48246266

GeneLoc  
 PromoterAssoc  
 CpGIsland

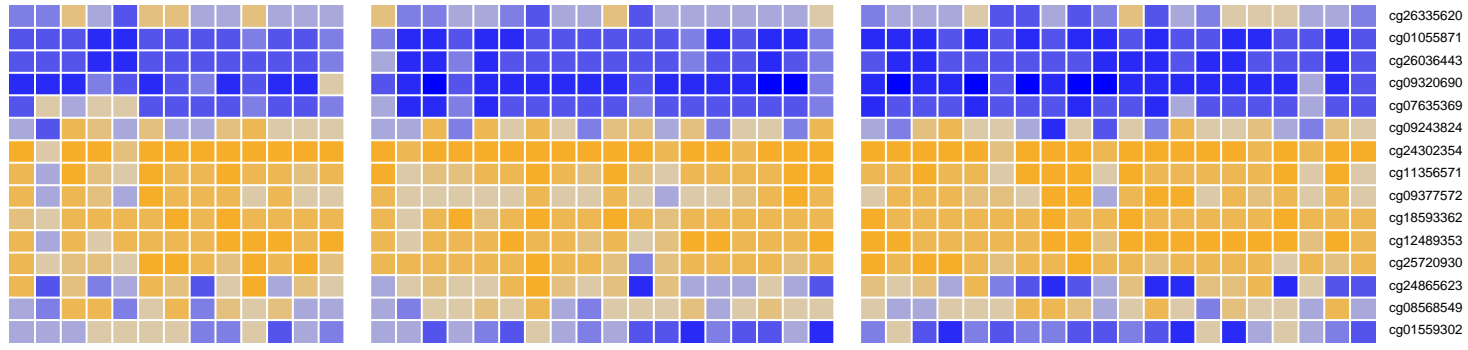

cg26335620  
 cg01055871  
 cg26036443  
 cg09320690  
 cg07635369  
 cg09243824  
 cg24302354  
 cg11356571  
 cg09377572  
 cg18593362  
 cg12489353  
 cg25720930  
 cg24865623  
 cg08568549  
 cg01559302

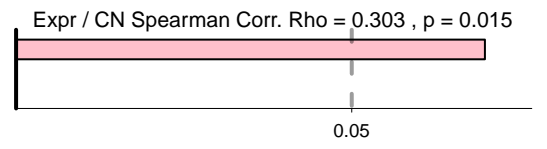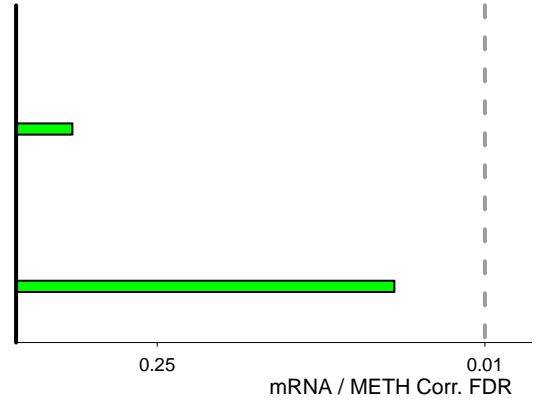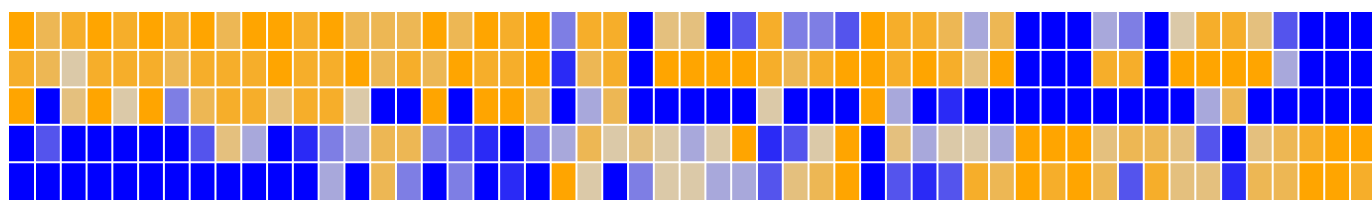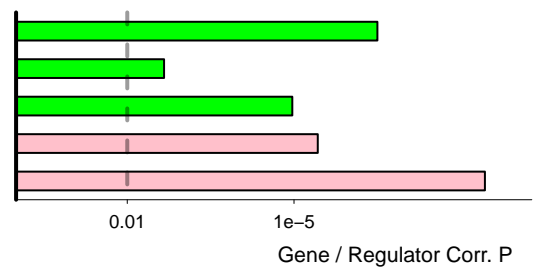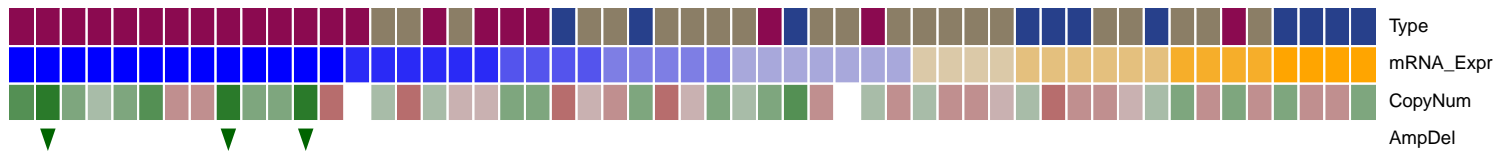

S2374  
 S2761  
 S2357  
 S2408  
 S2189  
 S2391  
 S2373  
 S2406  
 S2379  
 S2216  
 S2279  
 S2510  
 S2320  
 S2667  
 S2423  
 S2380  
 S2765  
 S2392  
 S2521  
 S2330  
 S2718  
 S2731  
 S2381  
 S2596  
 S2686  
 S2767  
 S2812  
 S2549  
 S2495  
 S2668  
 S2405  
 S2654  
 S2350  
 S2400  
 S2247  
 S2734  
 S2333  
 S2800  
 S2410  
 S2356  
 S2470  
 S2770A  
 S2650  
 S2645  
 S2338  
 S2365  
 S2097  
 S2508  
 S2153  
 S2583  
 S2688  
 S2125  
 S2261

Type  
 mRNA\_Expr  
 CopyNum  
 AmpDel

# COL12A1

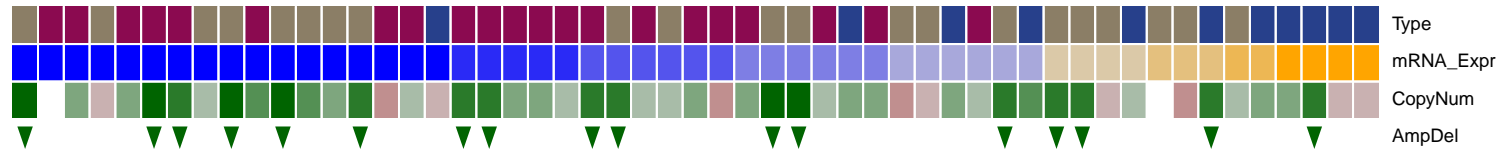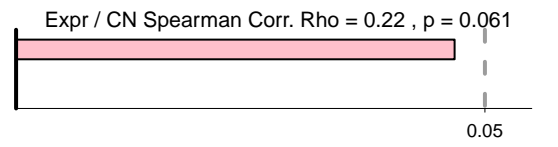

6 : 75917560  
6 : 75917468  
6 : 75916963  
6 : 75916445  
6 : 75916327  
6 : 75915885  
6 : 75915840  
6 : 75915787  
6 : 75915785  
6 : 75915782  
6 : 75915780  
6 : 75915754  
6 : 75915749  
6 : 75915730  
6 : 75915344  
6 : 75915250  
6 : 75914803  
6 : 75914706  
6 : 75914122  
6 : 75914046  
6 : 75914030  
6 : 75913786  
6 : 75912711  
6 : 75912633  
6 : 75912547  
6 : 75912410  
6 : 75912132  
6 : 75911956  
6 : 75911783  
6 : 75911716  
6 : 75910011  
6 : 75899060  
6 : 75890710  
6 : 75884860  
6 : 75884826  
6 : 75884800  
6 : 75861687  
6 : 75853813  
6 : 75840675  
6 : 75804472  
6 : 75798778  
6 : 75796125  
6 : 75795679  
6 : 75795067  
6 : 75794995  
6 : 75794881  
6 : 75794800

GeneLoc  
PromoterAssoc  
CpIsland

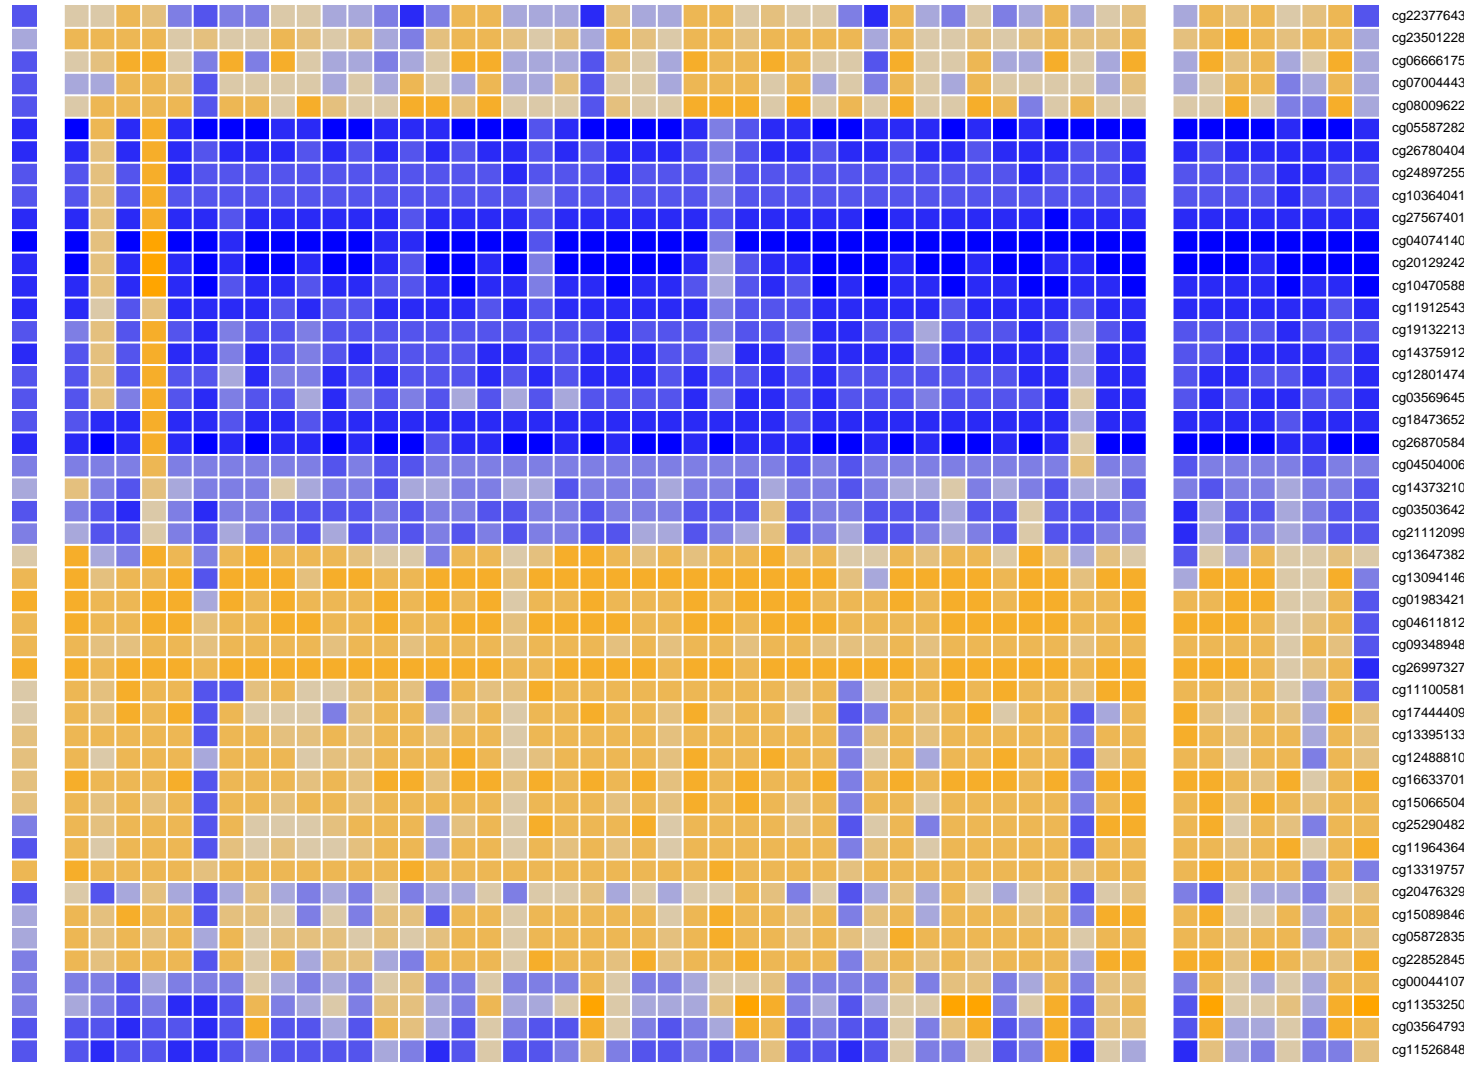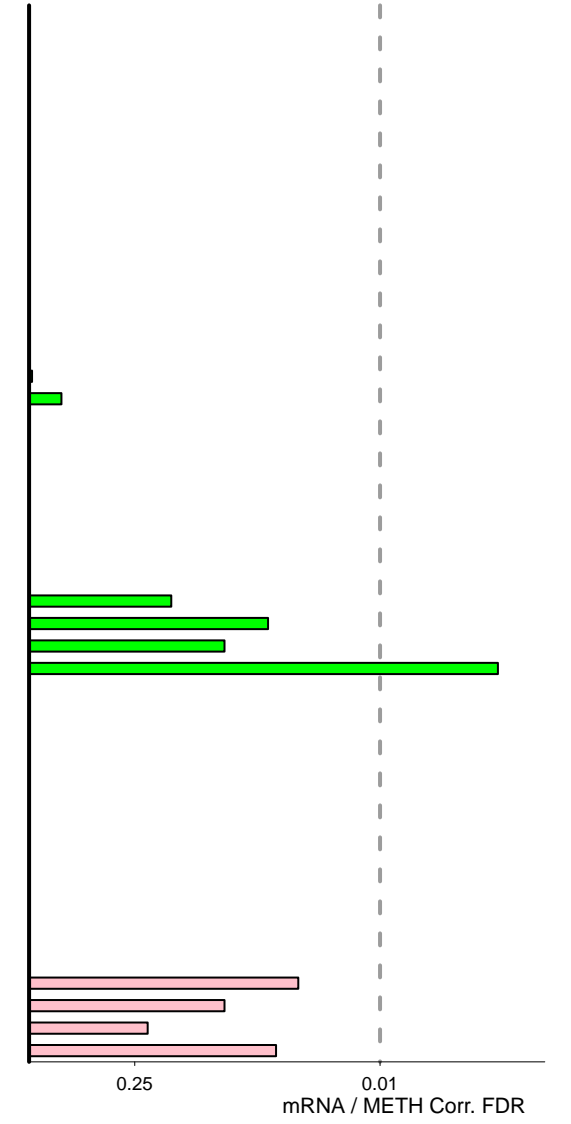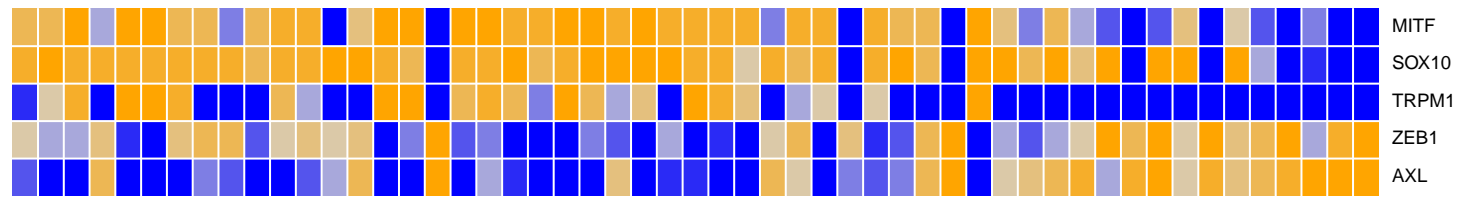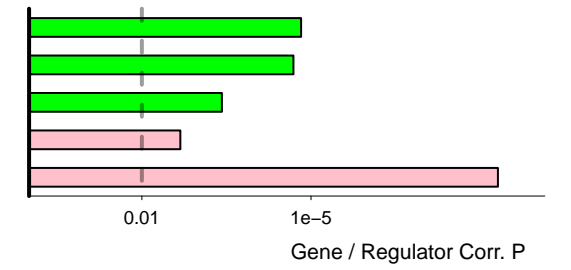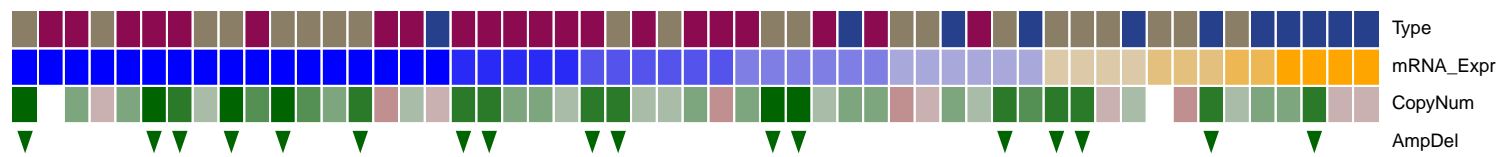

S2333  
S2667  
S2216  
S2650  
S2521  
S2391  
S2379  
S2380  
S2645  
S2761  
S2247  
S2549  
S2153  
S2374  
S2765  
S2770A  
S2406  
S2320  
S2508  
S2373  
S2408  
S2718  
S2097  
S2279  
S2734  
S2330  
S2510  
S2357  
S2654  
S2381  
S2189  
S2686  
S2668  
S2392  
S2423  
S2356  
S2400  
S2812  
S2405  
S2410  
S2800  
S2495  
S2338  
S2350  
S2767  
S2470  
S2365  
S2583  
S2261  
S2731  
S2688  
S2125

# MICAL2

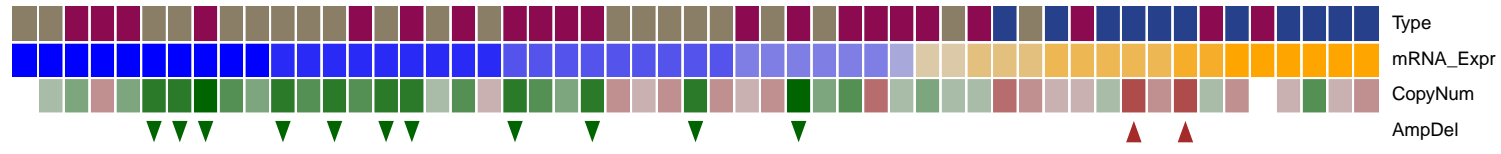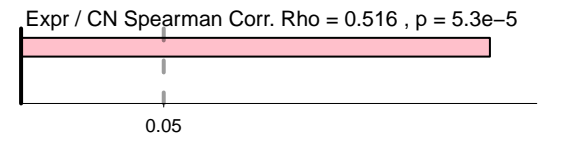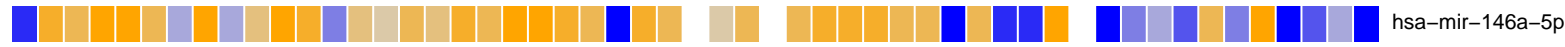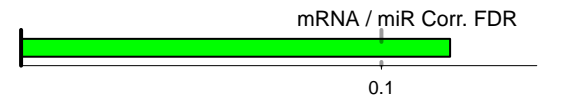

11 : 12114609  
 11 : 12124419  
 11 : 12125622  
 11 : 12128203  
 11 : 12131739  
 11 : 12131814  
 11 : 12132460  
 11 : 12132611  
 11 : 12133015  
 11 : 12133196  
 11 : 12136405  
 11 : 12140139  
 11 : 12141744  
 11 : 12148288  
 11 : 12159762  
 11 : 12164373  
 11 : 12181467  
 11 : 12188996  
 11 : 12200844  
 11 : 12207449  
 11 : 12222570  
 11 : 12228521  
 11 : 12235611  
 11 : 12252002  
 11 : 12255685  
 11 : 12263892  
 11 : 12270286  
 11 : 12271701  
 11 : 12279778  
 11 : 12284949

GeneLoc  
 PromoterAssoc  
 CpGIsland

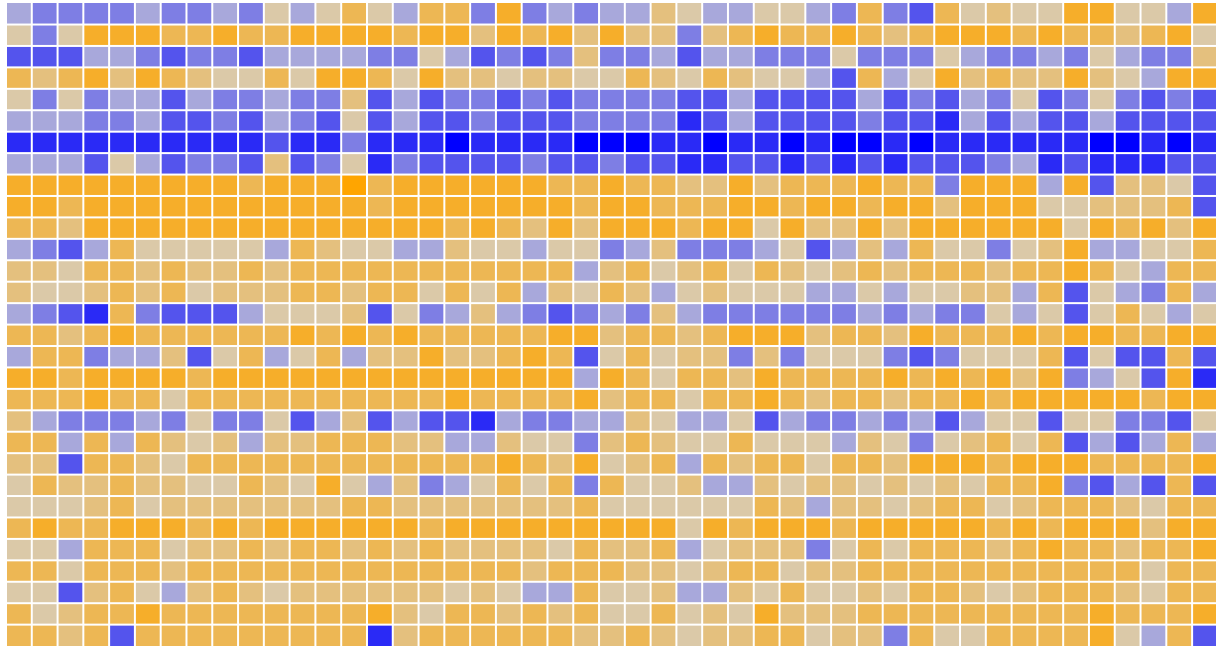

cg19771350  
 cg03005191  
 cg22755370  
 cg14816825  
 cg22967016  
 cg16946439  
 cg01740020  
 cg12422683  
 cg12122057  
 cg24022152  
 cg23044178  
 cg03860250  
 cg27286609  
 cg03821121  
 cg19347782  
 cg14792845  
 cg04468741  
 cg01963702  
 cg23254316  
 cg00286773  
 cg09371112  
 cg10383724  
 cg27133034  
 cg01400480  
 cg06796220  
 cg27631389  
 cg14081744  
 cg09412882  
 cg14603605  
 cg02143936

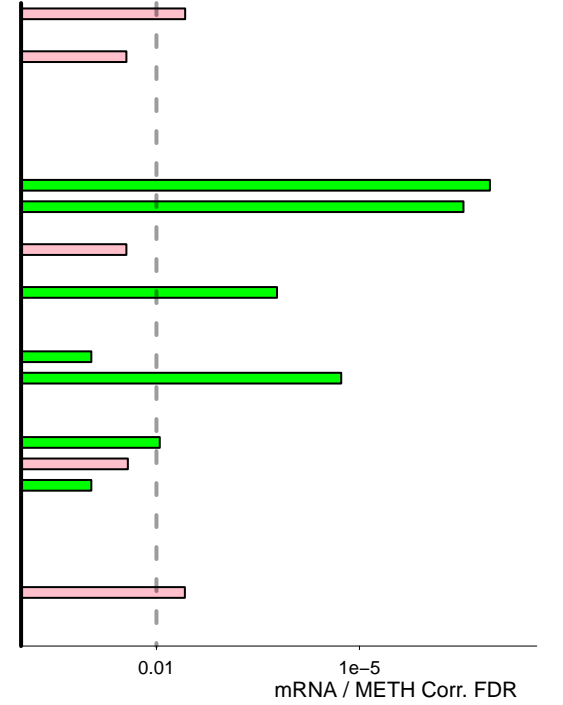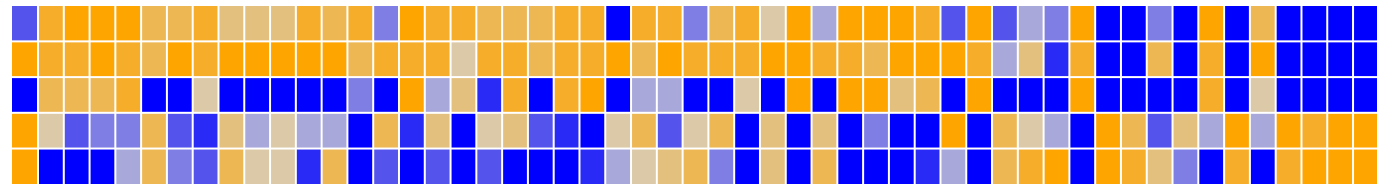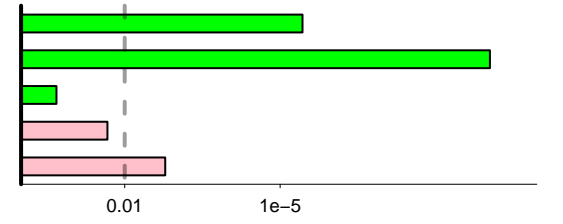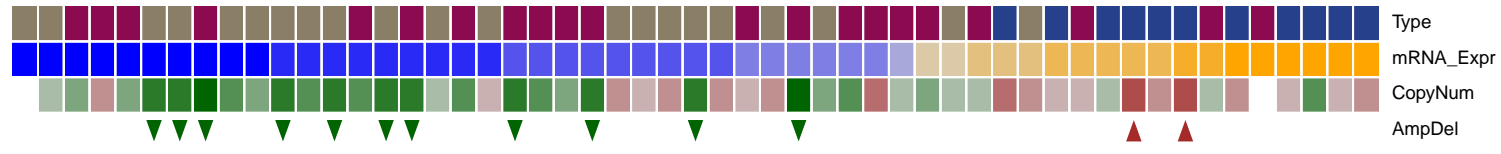

S2350  
 S2596  
 S2406  
 S2718  
 S2320  
 S2423  
 S2392  
 S2668  
 S2153  
 S2812  
 S2767  
 S2734  
 S2410  
 S2373  
 S2645  
 S2521  
 S2247  
 S2357  
 S2333  
 S2379  
 S2761  
 S2510  
 S2330  
 S2549  
 S2381  
 S2097  
 S2654  
 S2380  
 S2189  
 S2365  
 S2400  
 S2650  
 S2374  
 S2765  
 S2279  
 S2508  
 S2495  
 S2408  
 S2583  
 S2800  
 S2731  
 S2391  
 S2356  
 S2338  
 S2405  
 S2686  
 S2216  
 S2470  
 S2667  
 S2261  
 S2688  
 S2770A  
 S2125

# ERRF1

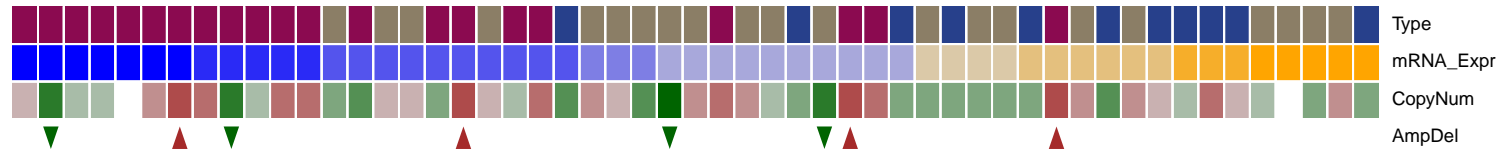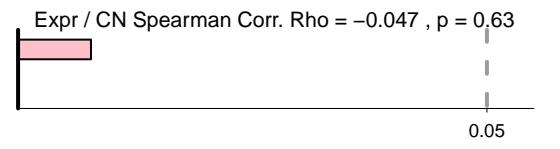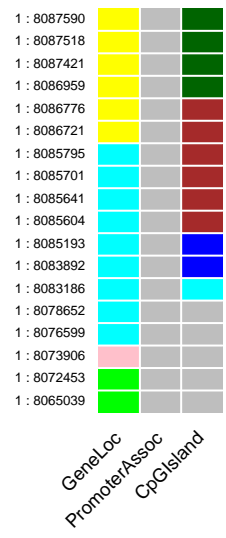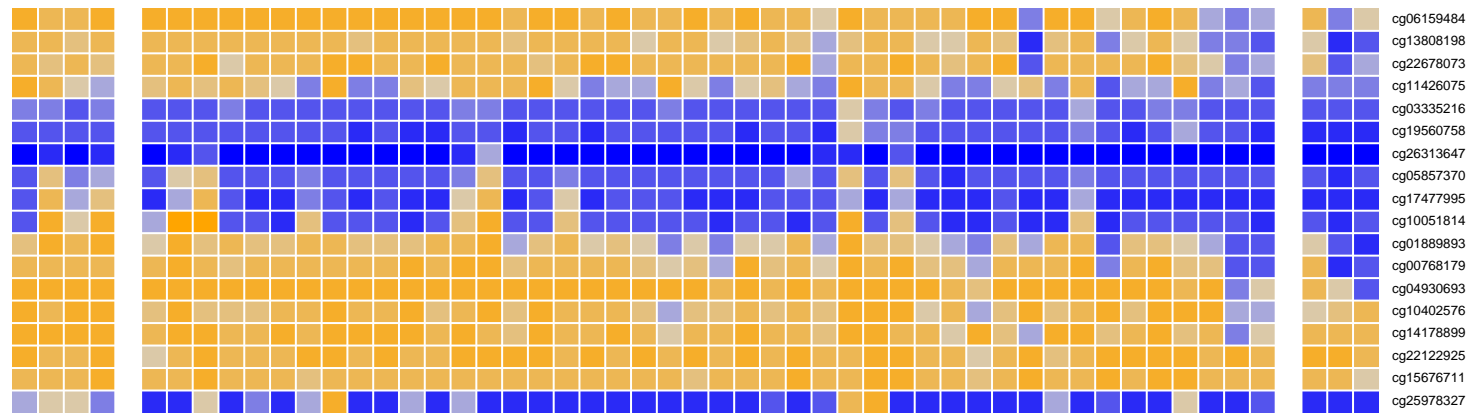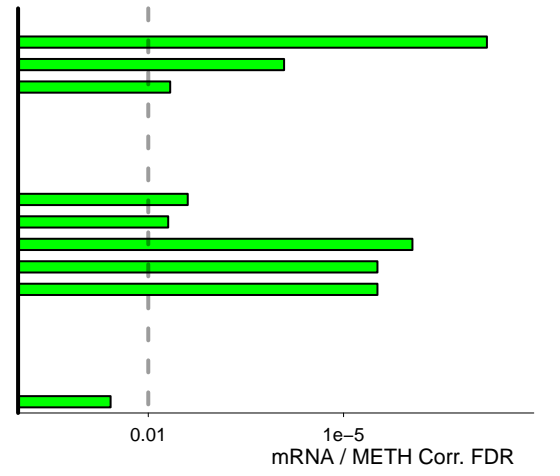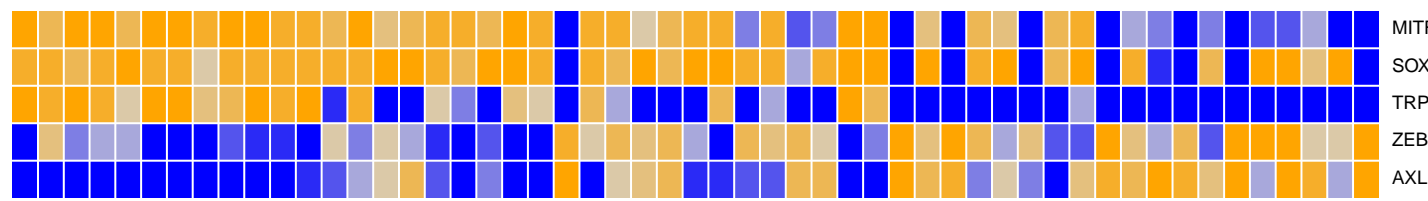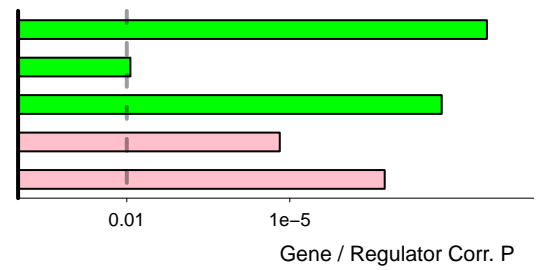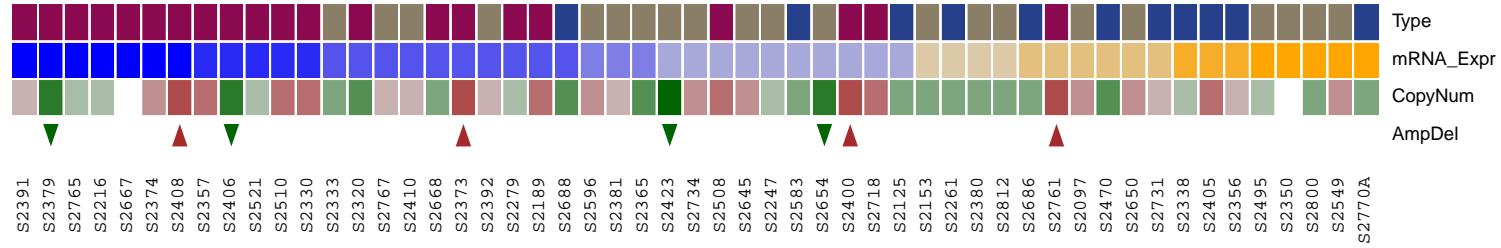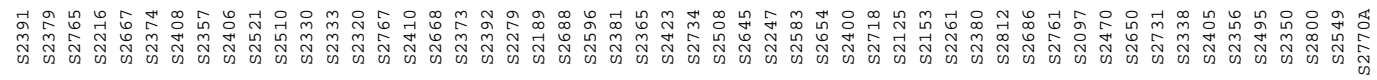



# SLC14A1

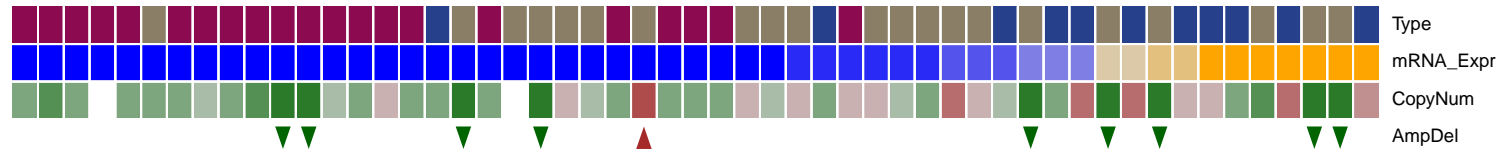

18 : 43302872  
 18 : 43302987  
 18 : 43303777  
 18 : 43304007  
 18 : 43304079  
 18 : 43304452  
 18 : 43305540  
 18 : 43305617  
 18 : 43305784  
 18 : 43306919  
 18 : 43320153  
 18 : 43330032

GeneLoc  
 PromoterAssoc  
 CpGIsland

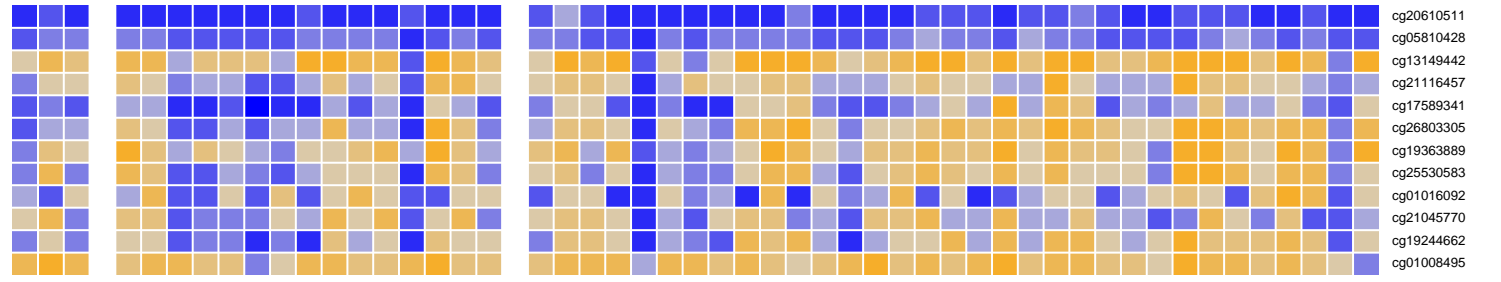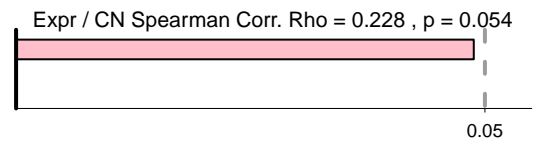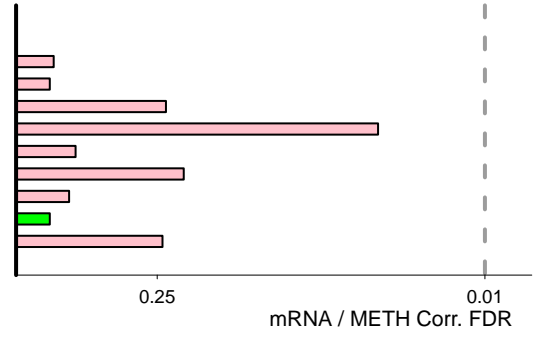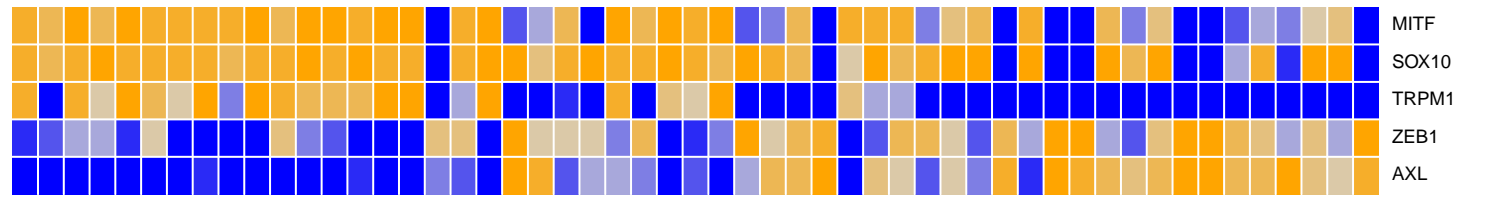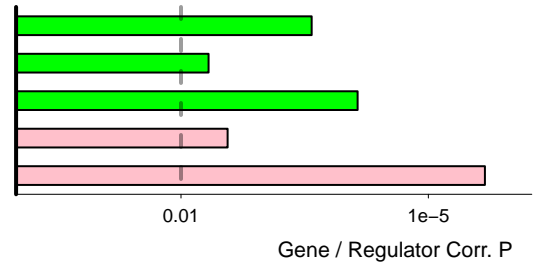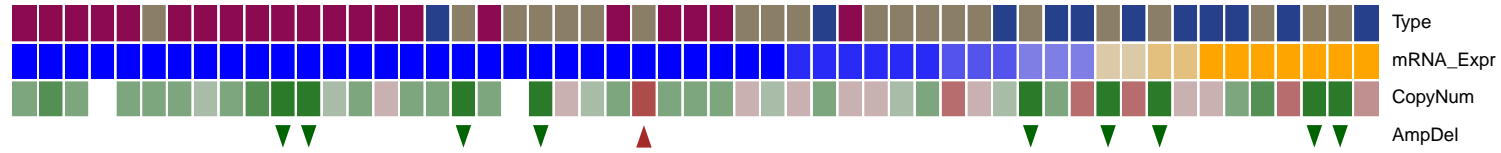

S2510  
 S2761  
 S2216  
 S2667  
 S2521  
 S2596  
 S2189  
 S2330  
 S2373  
 S2374  
 S2379  
 S2718  
 S2406  
 S2508  
 S2391  
 S2408  
 S2686  
 S2247  
 S2400  
 S2350  
 S2800  
 S2333  
 S2549  
 S2320  
 S2380  
 S2279  
 S2668  
 S2765  
 S2495  
 S2654  
 S2423  
 S2688  
 S2357  
 S2097  
 S2381  
 S2645  
 S2767  
 S2392  
 S2338  
 S2734  
 S2356  
 S2261  
 S2410  
 S2405  
 S2153  
 S2125  
 S2770A  
 S2583  
 S2650  
 S2731  
 S2365  
 S2812  
 S2470

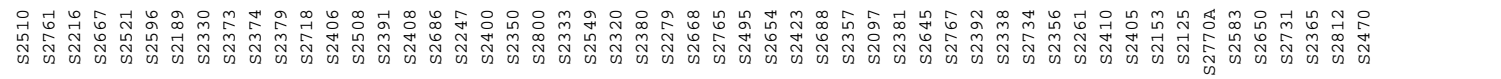

Gene / Regulator Corr. P

# ADAM19

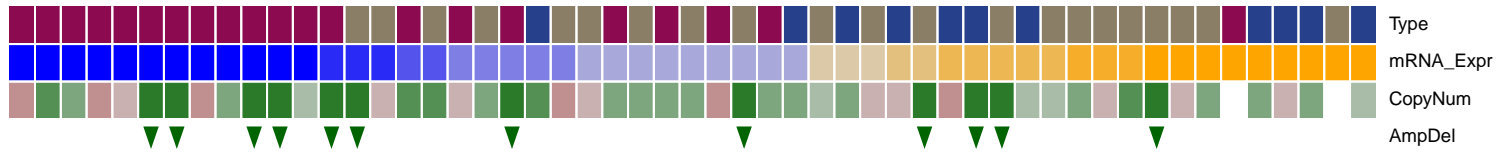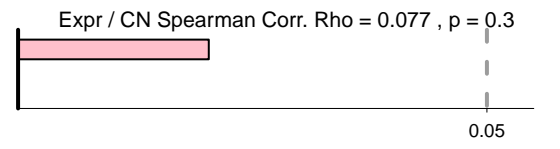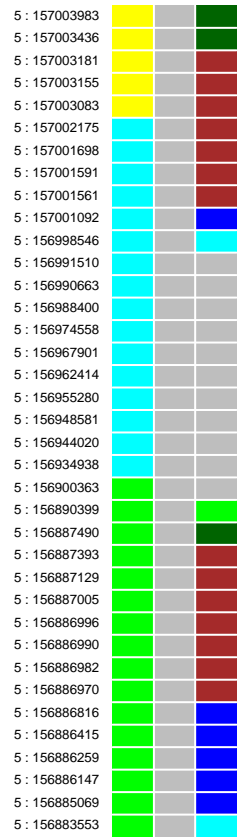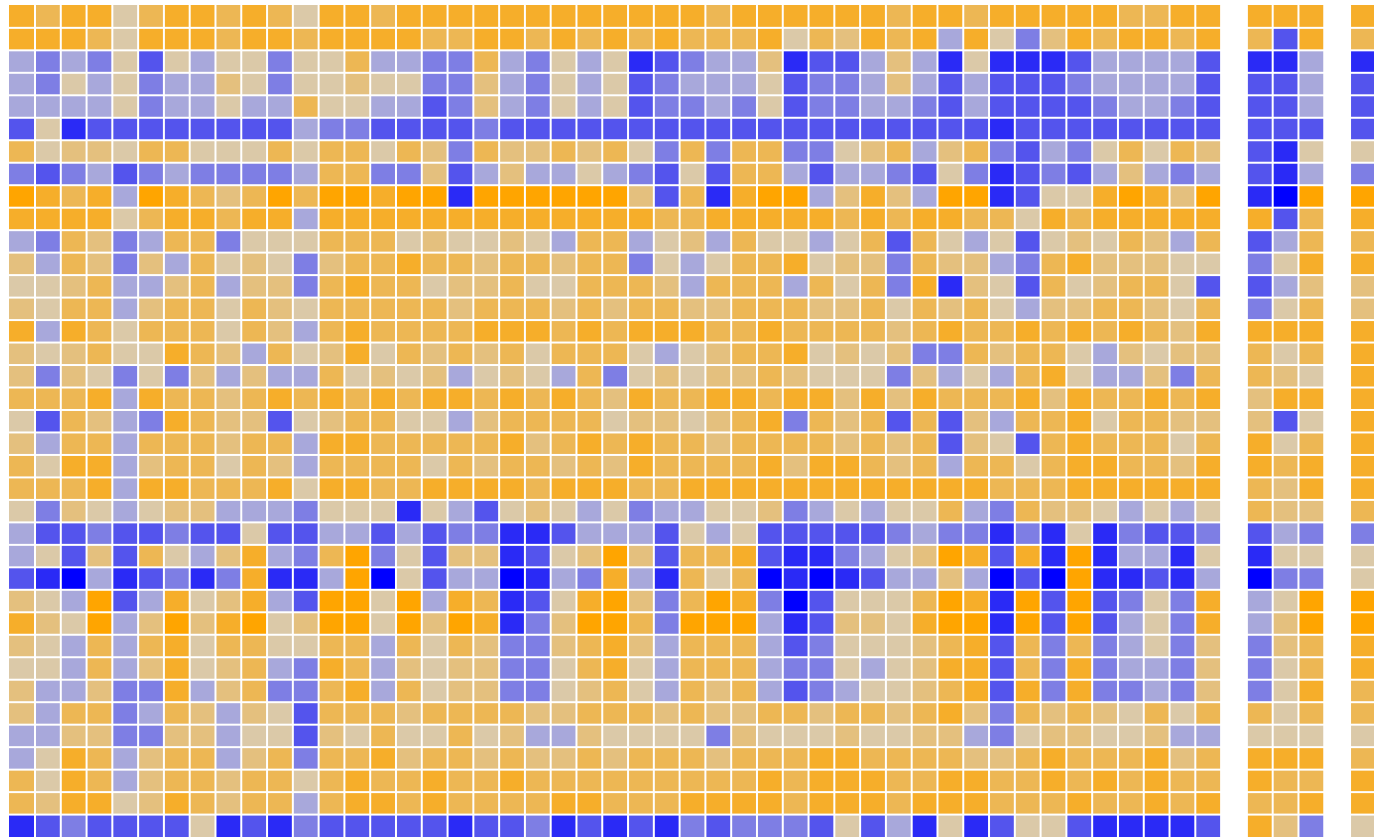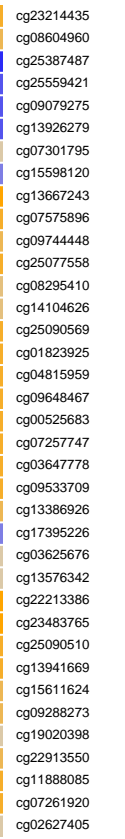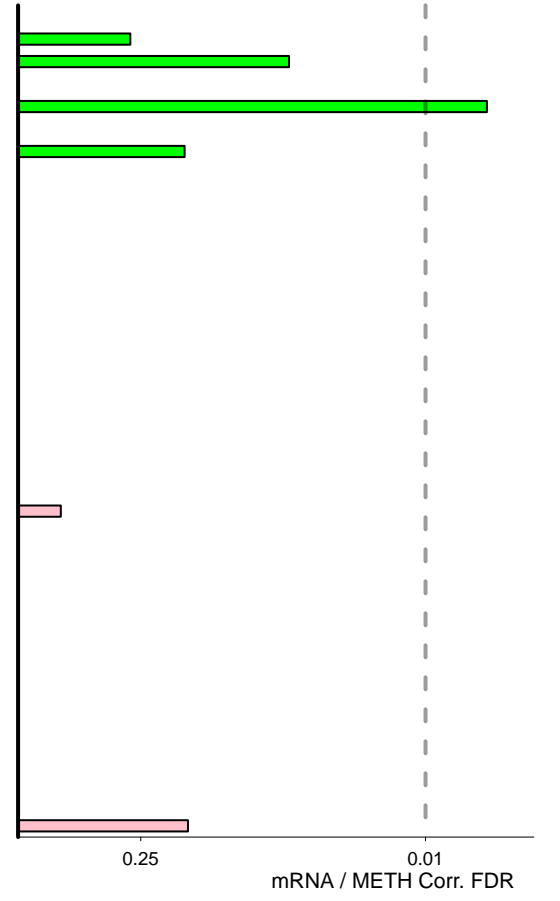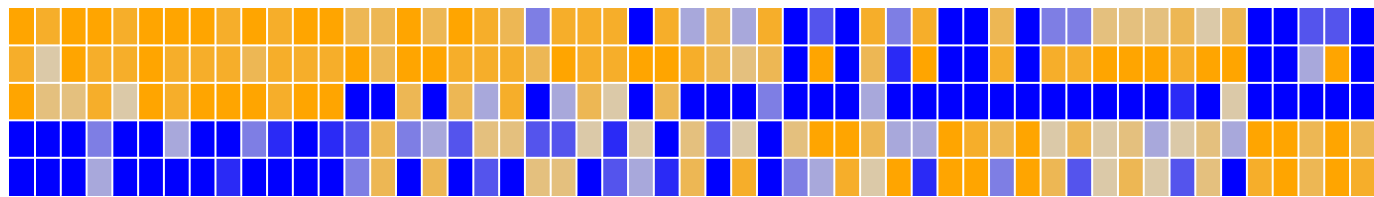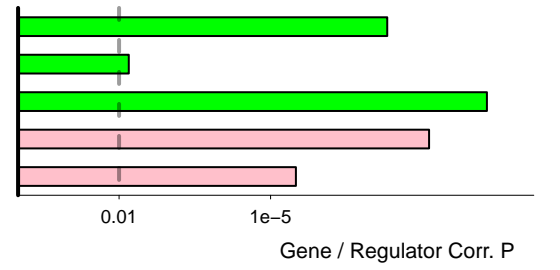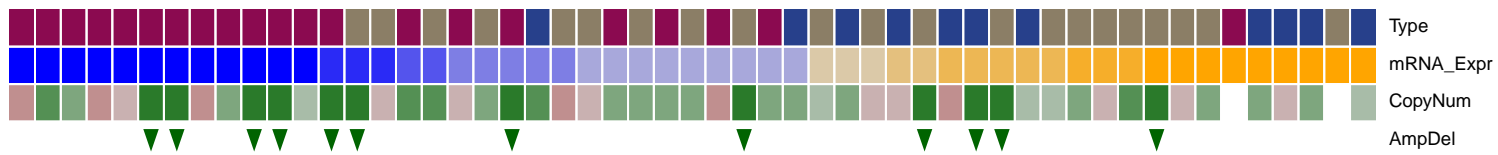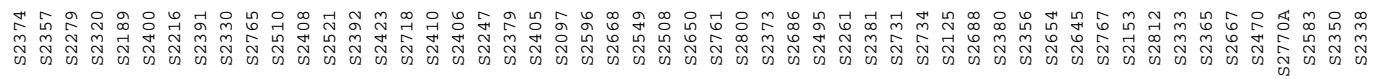

# KRT8

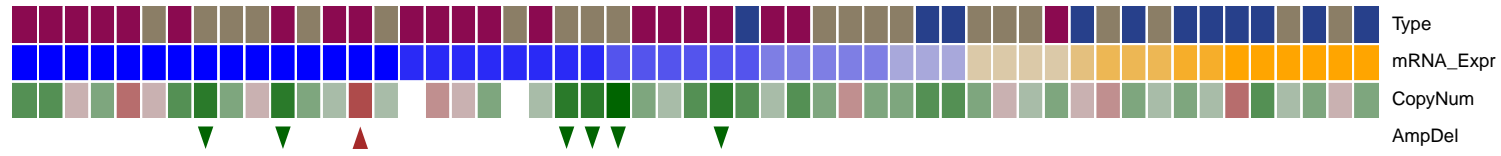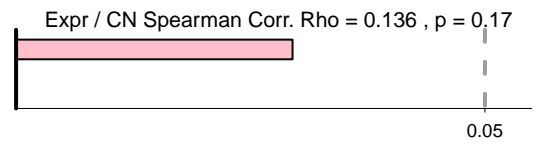

12:53344746  
12:53344573  
12:53343849  
12:53343703  
12:53343514  
12:53342890  
12:53342770  
12:53342757  
12:53342755  
12:53342748  
12:53342746  
12:53342635  
12:53342595  
12:53341805  
12:53339813  
12:53338607  
12:53321588  
12:53320632  
12:53320306  
12:53319217  
12:53302715  
12:53300293  
12:53299310  
12:53299145  
12:53298911  
12:53298886  
12:53298822  
12:53298678  
12:53298424  
12:53298383  
12:53298027  
12:53297987  
12:53297819  
12:53297693  
12:53297547  
12:53297443  
12:53297384  
12:53293549

GeneLoc  
PromoterAssoc  
CpGIsland

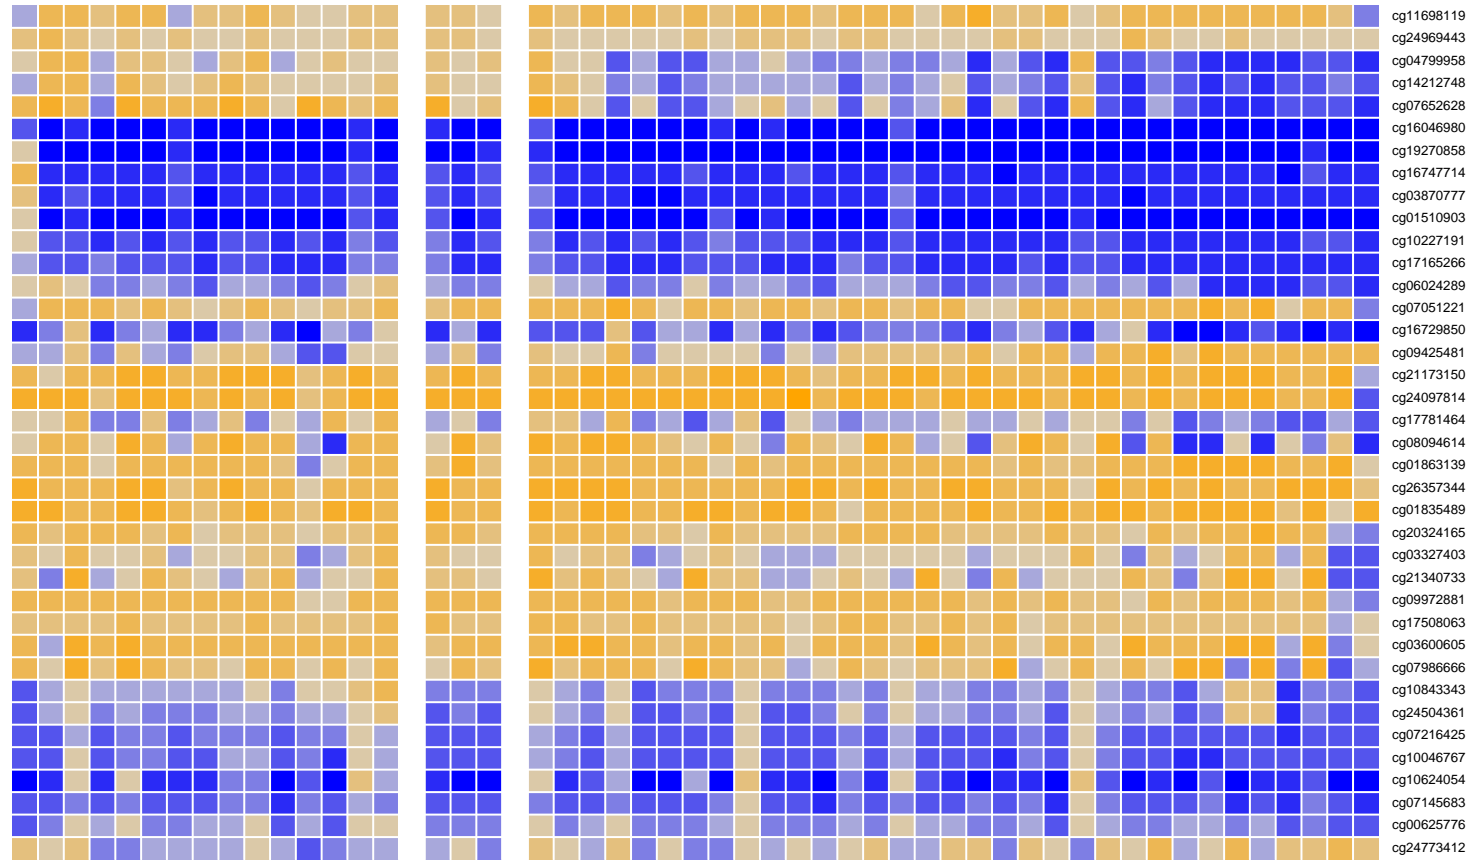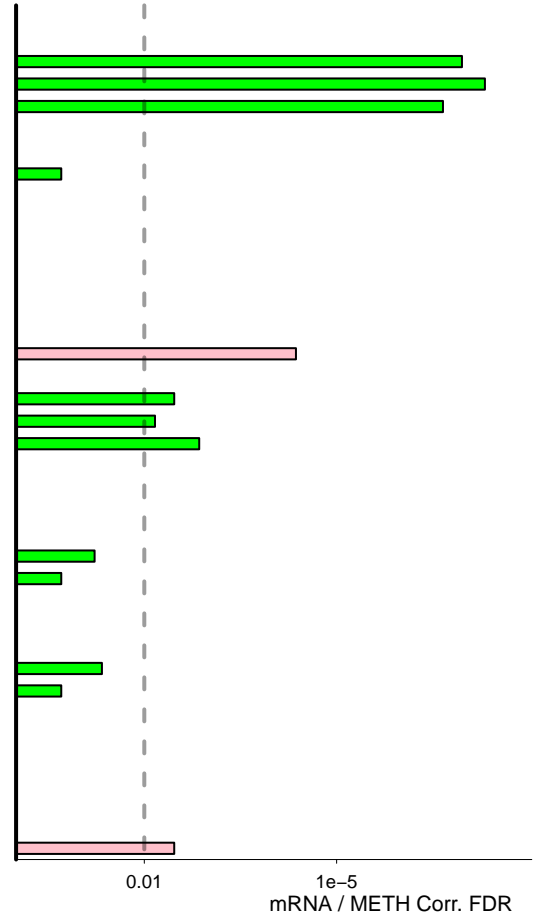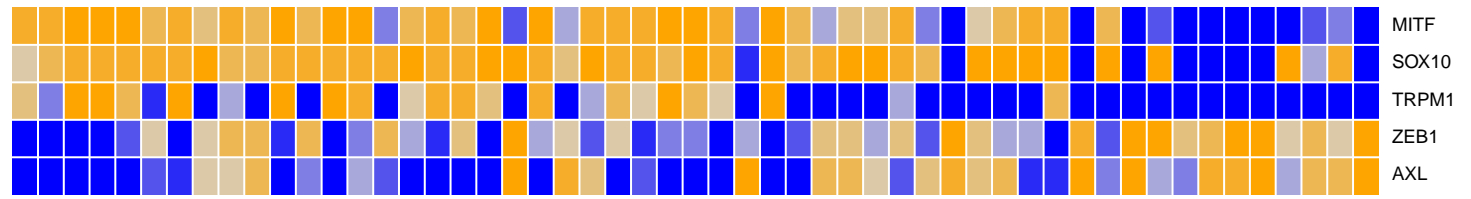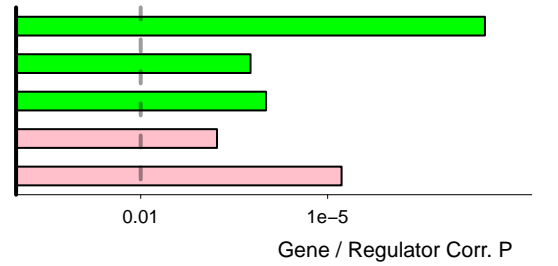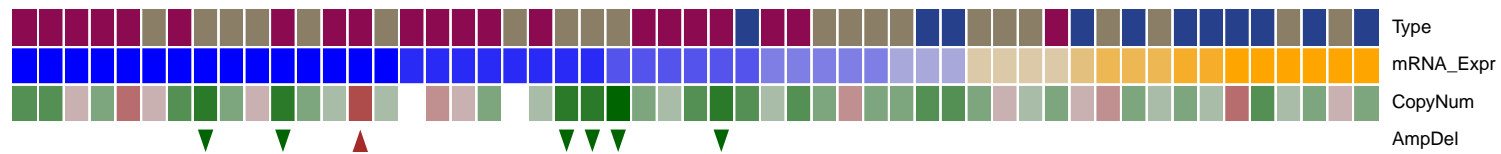

S2357  
S2373  
S2391  
S2374  
S2406  
S2333  
S2330  
S2767  
S2381  
S2423  
S2521  
S2380  
S2408  
S2320  
S2645  
S2667  
S2510  
S2379  
S2279  
S2350  
S2216  
S2800  
S2097  
S2596  
S2668  
S2765  
S2718  
S2189  
S2731  
S2400  
S2761  
S2650  
S2153  
S2812  
S2247  
S2405  
S2261  
S2365  
S2410  
S2734  
S2508  
S2688  
S2392  
S2356  
S2495  
S2686  
S2338  
S2470  
S2770A  
S2549  
S2583  
S2654  
S2125

# CLMP

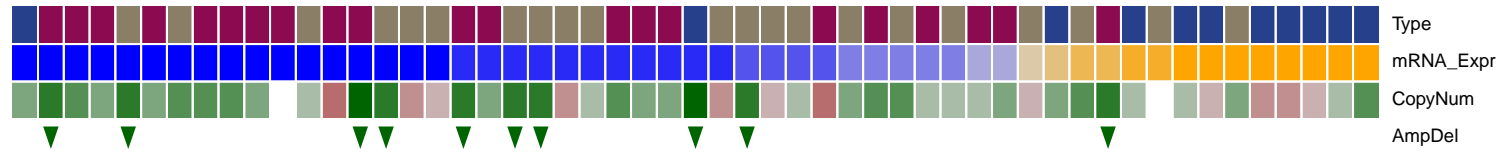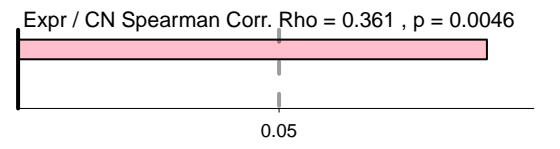

11:123067275  
11:123067200  
11:123066956  
11:123066963  
11:123066560  
11:123066529  
11:123066252  
11:123066183  
11:123066179  
11:123066108  
11:123065445  
11:123065246  
11:123063169  
11:123057074  
11:123052256  
11:123050207  
11:123048161  
11:123044747  
11:123037886  
11:123036897  
11:123034487  
11:123029267  
11:123017634  
11:123016010  
11:123008499  
11:123008408  
11:123001272  
11:122993208  
11:122954435  
11:122943141

GeneLoc  
PromoterAssoc  
CpGIsland

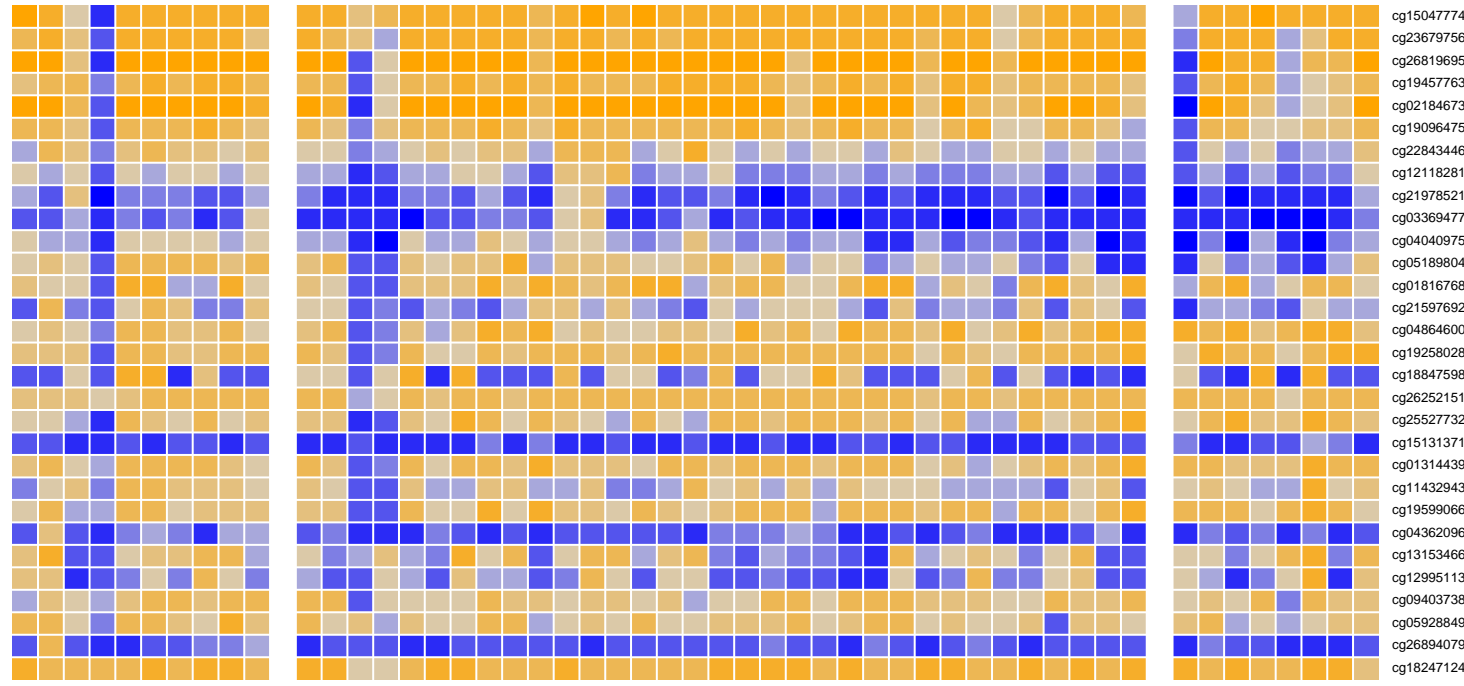

cg15047774  
cg23679756  
cg26819695  
cg19457763  
cg02184673  
cg19096475  
cg22843446  
cg12118281  
cg21978521  
cg03369477  
cg04040975  
cg05189804  
cg01816768  
cg21597692  
cg04864600  
cg19258028  
cg18847598  
cg26252151  
cg25527732  
cg15131371  
cg01314439  
cg11432943  
cg19599066  
cg04362096  
cg13153466  
cg12995113  
cg09403738  
cg05928849  
cg26894079  
cg18247124

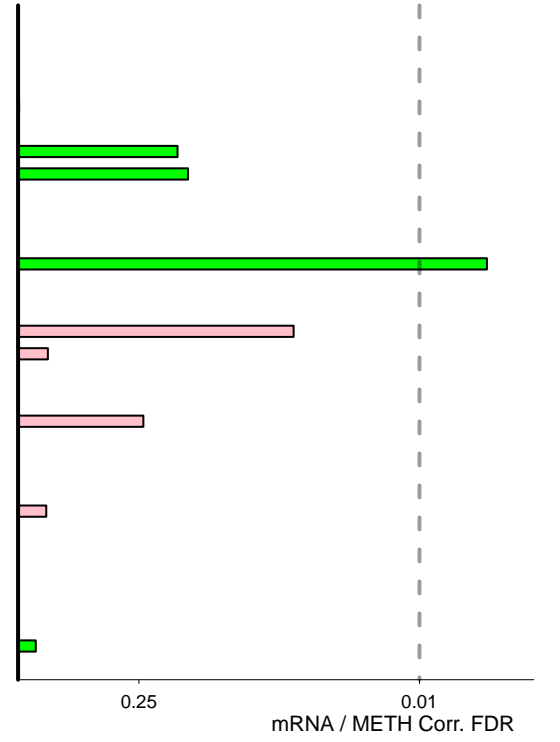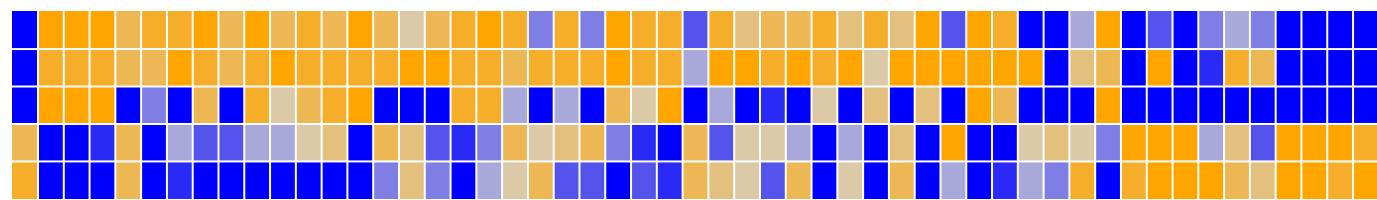

MITF  
SOX10  
TRPM1  
ZEB1  
AXL

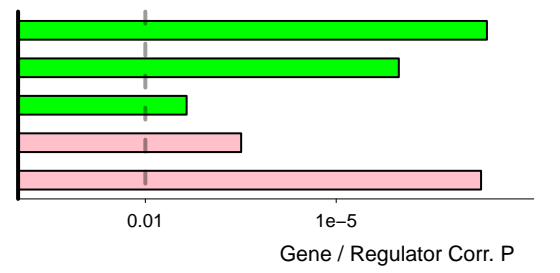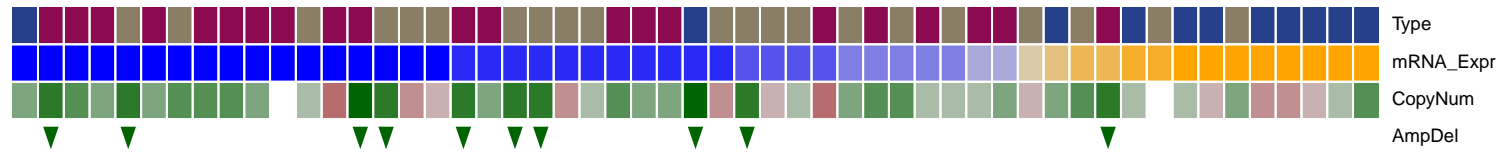

S2338  
S2391  
S2374  
S2521  
S2423  
S2373  
S2734  
S2406  
S2761  
S2216  
S2667  
S2596  
S2379  
S2408  
S2380  
S2365  
S2392  
S2510  
S2320  
S2381  
S2654  
S2247  
S2645  
S2718  
S2668  
S2330  
S2583  
S2097  
S2767  
S2333  
S2410  
S2189  
S2812  
S2357  
S2153  
S2279  
S2495  
S2400  
S2508  
S2549  
S2686  
S2800  
S2765  
S2470  
S2350  
S2356  
S2731  
S2650  
S2405  
S2125  
S2770A  
S2261  
S2688

# NRG1

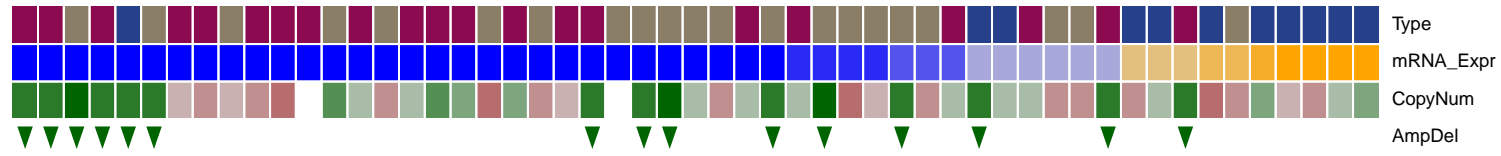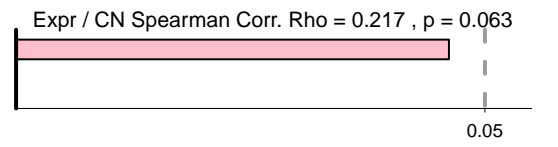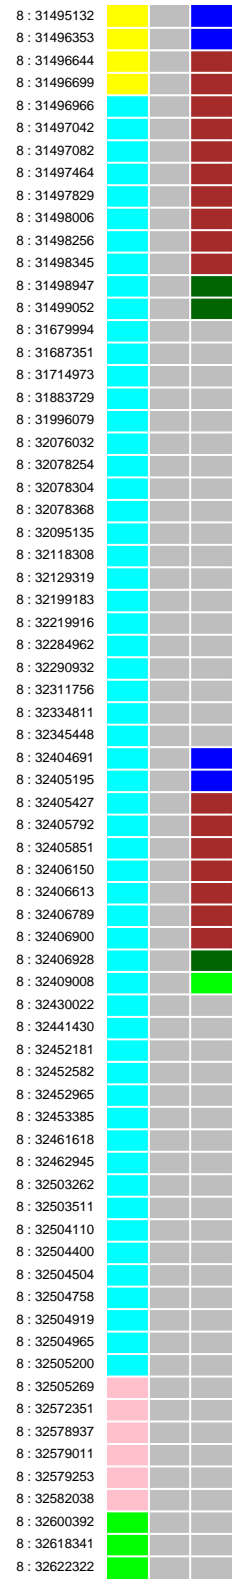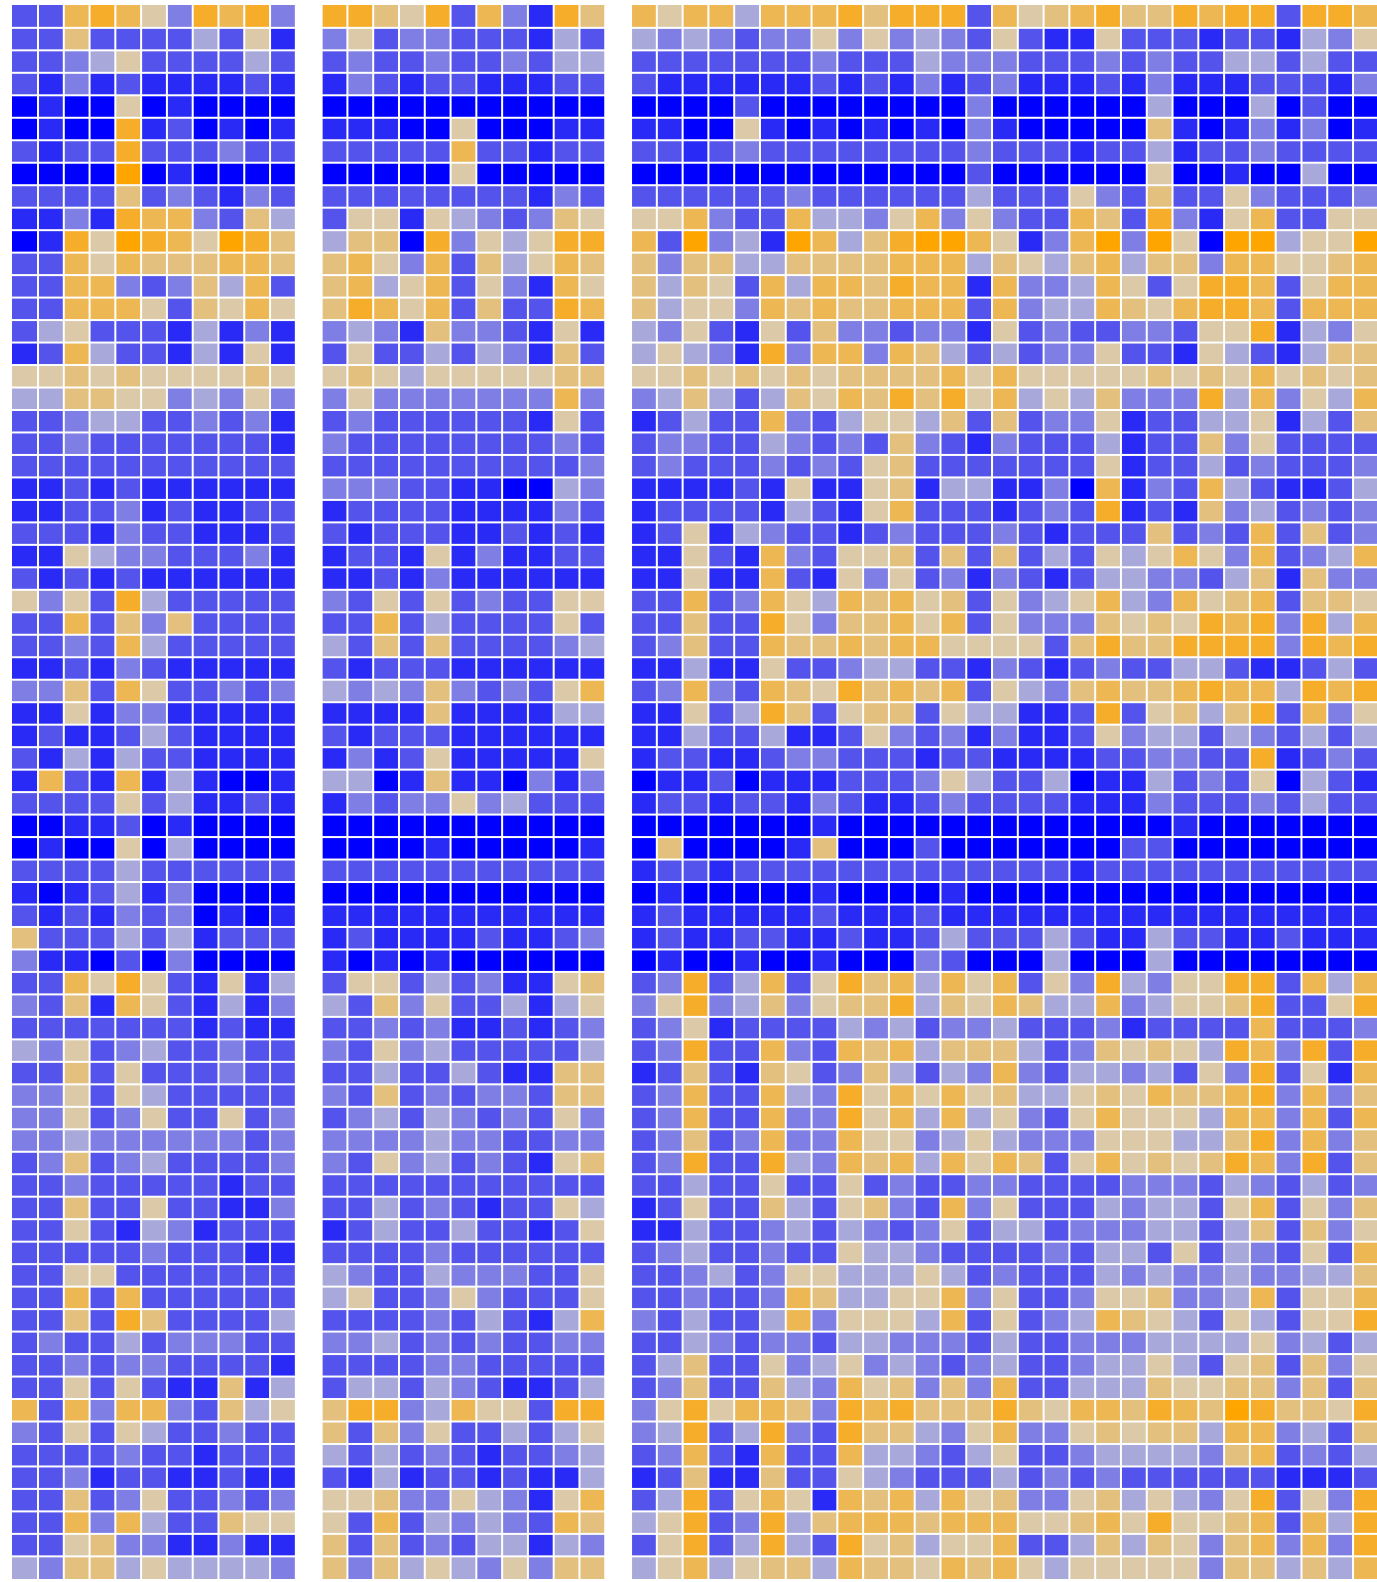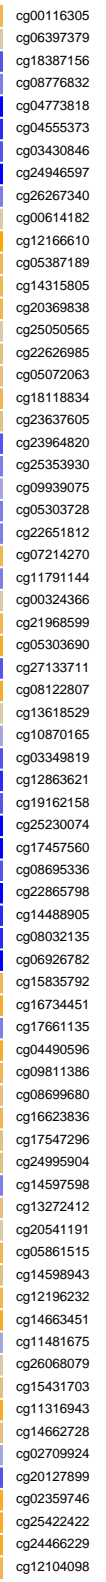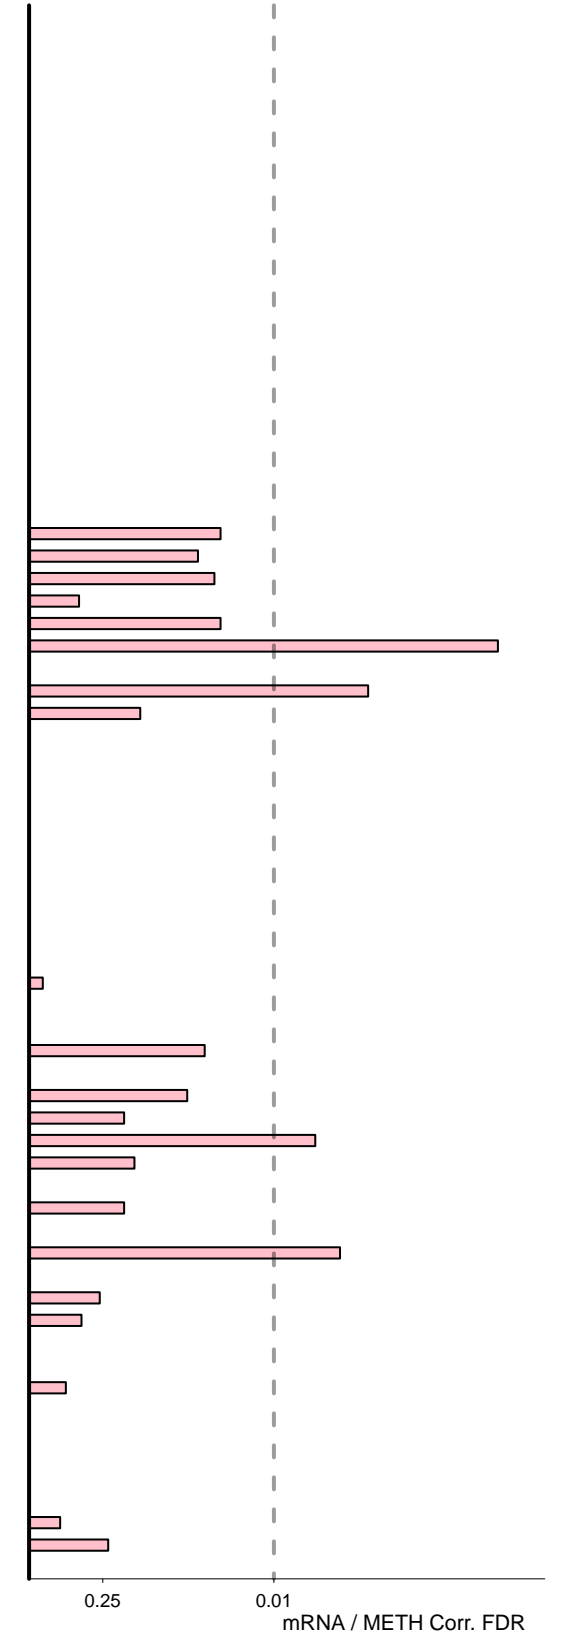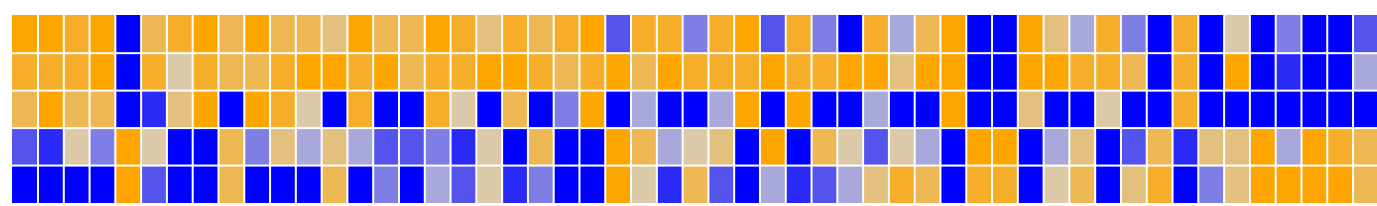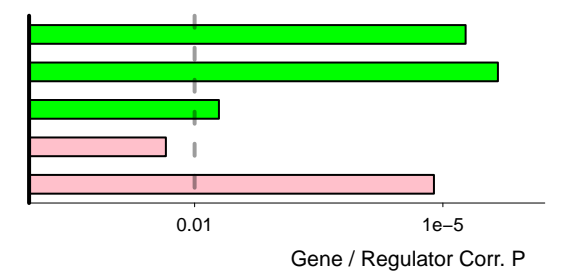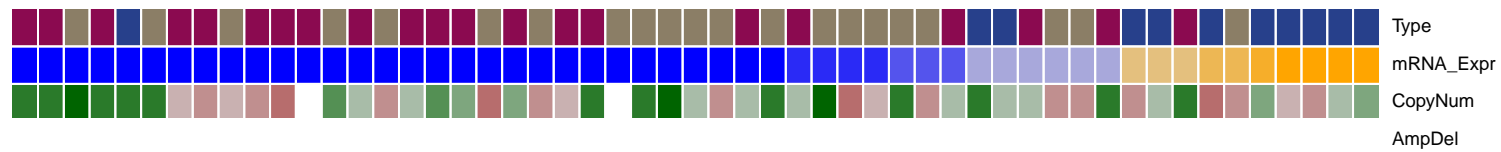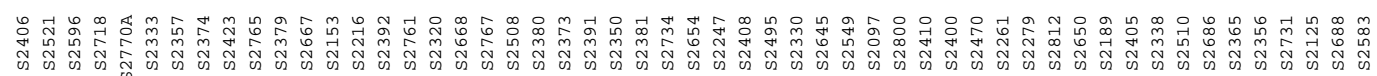

# ITGA11

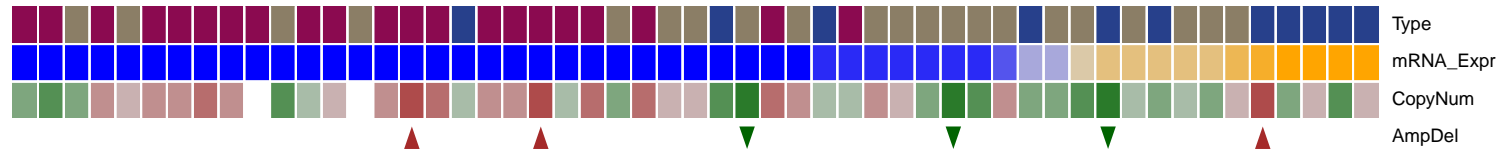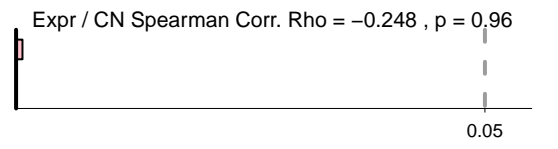

15 : 68725002  
 15 : 68724948  
 15 : 68724752  
 15 : 68724690  
 15 : 68724370  
 15 : 68724065  
 15 : 68723914  
 15 : 68723805  
 15 : 68723690  
 15 : 68722383  
 15 : 68719924  
 15 : 68713677  
 15 : 68711872  
 15 : 68699713  
 15 : 68682927  
 15 : 68678044  
 15 : 68672005  
 15 : 68667977  
 15 : 68659758  
 15 : 68645969  
 15 : 68633792  
 15 : 68627404  
 15 : 68624879  
 15 : 68624768  
 15 : 68624713  
 15 : 68623032  
 15 : 68608583  
 15 : 68606598  
 15 : 68597823  
 15 : 68594860  
 15 : 68594526

GeneLoc  
 PromoterAssoc  
 CpGIsland

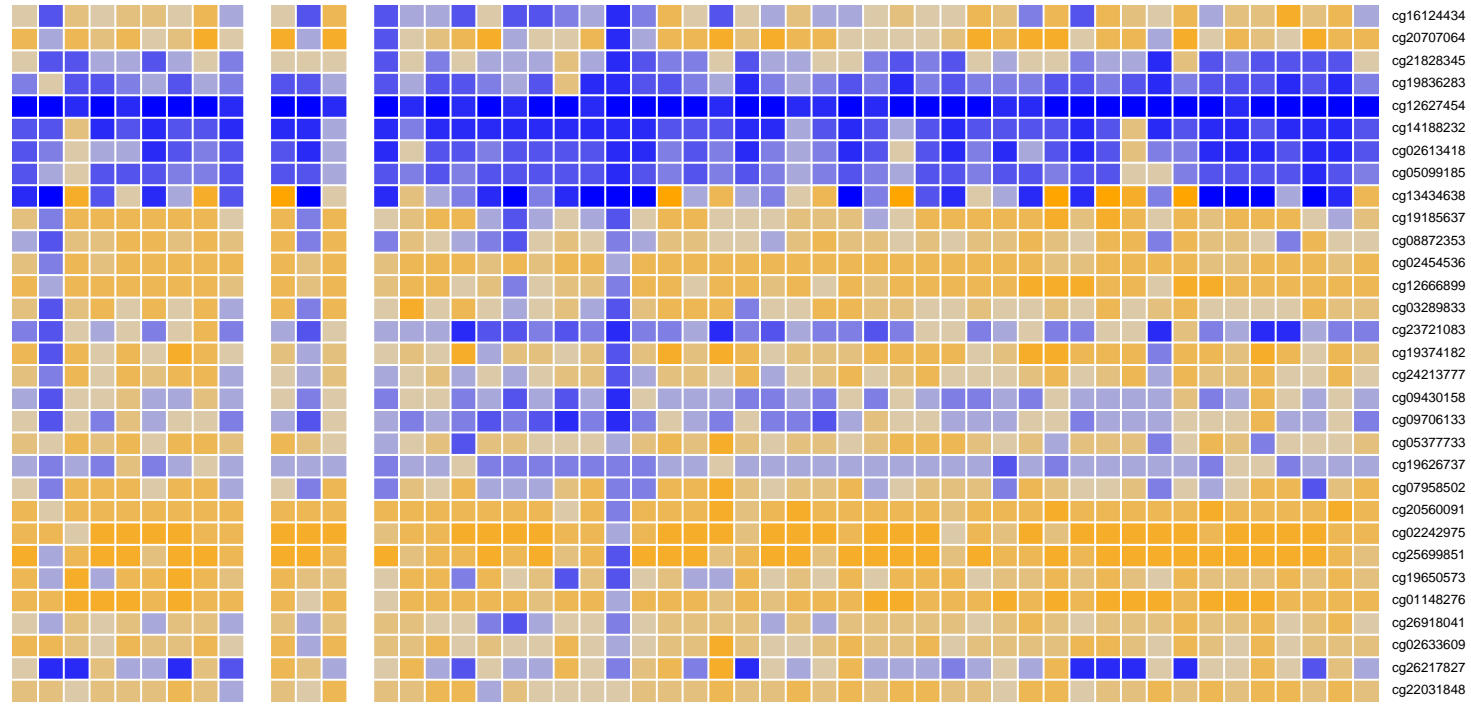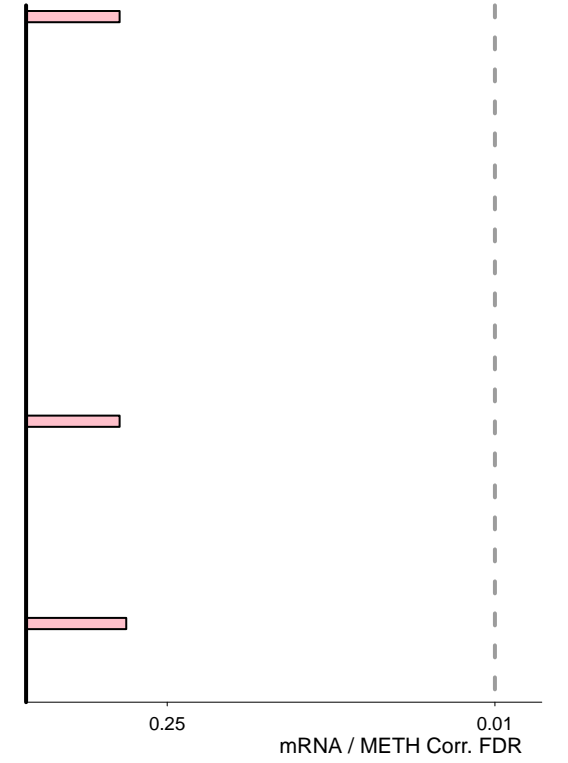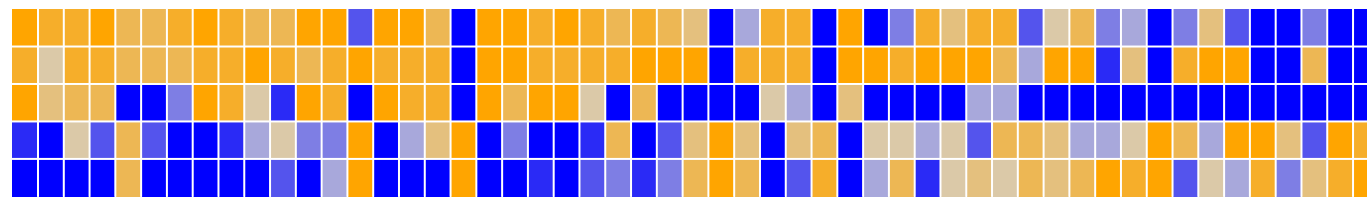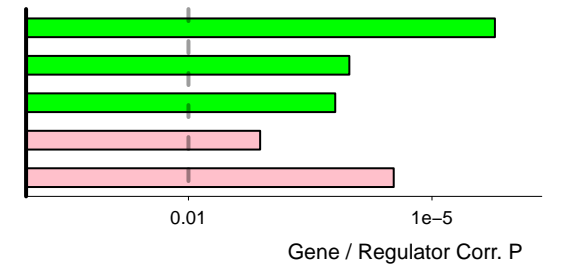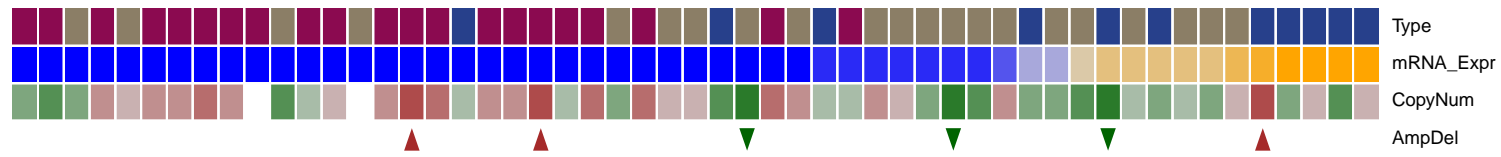

S2521  
 S2357  
 S2596  
 S2406  
 S2423  
 S2761  
 S2373  
 S2391  
 S2510  
 S2667  
 S2333  
 S2765  
 S2320  
 S2350  
 S2374  
 S2216  
 S2379  
 S2356  
 S2400  
 S2718  
 S2330  
 S2408  
 S2668  
 S2380  
 S2508  
 S2392  
 S2153  
 S2770A  
 S2650  
 S2189  
 S2247  
 S2338  
 S2279  
 S2549  
 S2654  
 S2734  
 S2767  
 S2097  
 S2381  
 S2583  
 S2365  
 S2410  
 S2731  
 S2800  
 S2125  
 S2645  
 S2812  
 S2495  
 S2470  
 S2686  
 S2405  
 S2261  
 S2688

# RARRES3

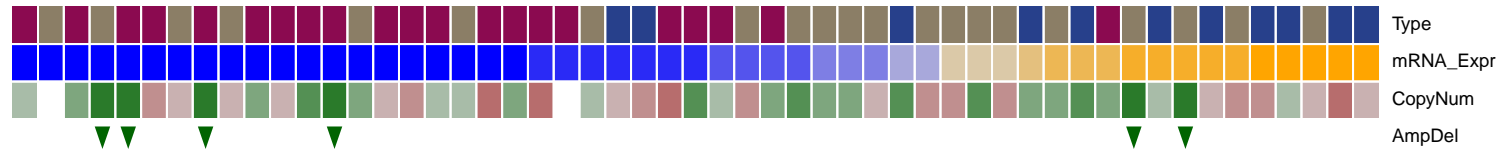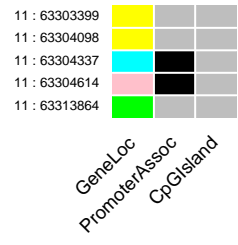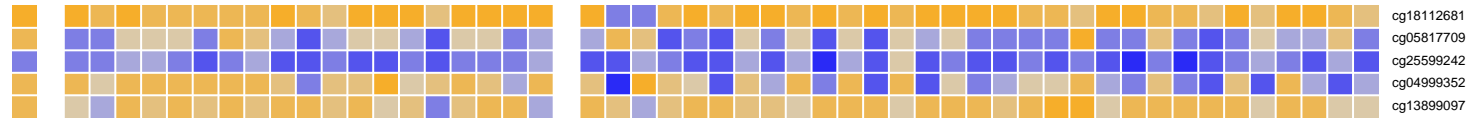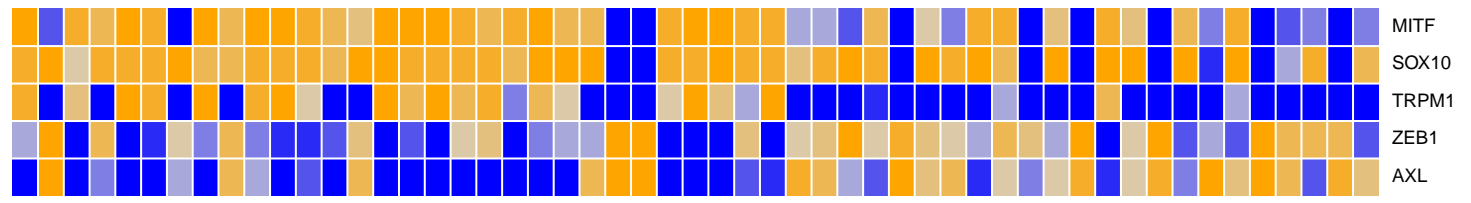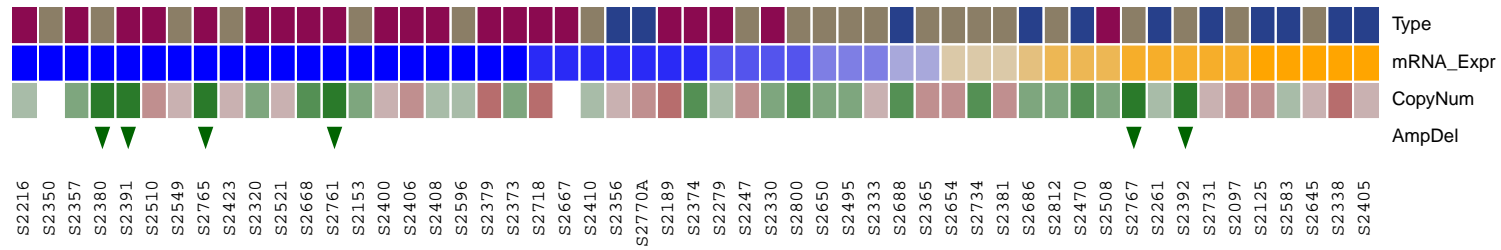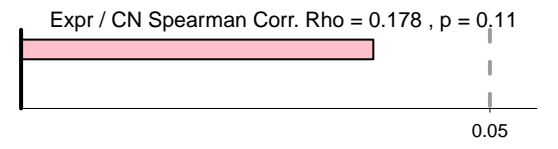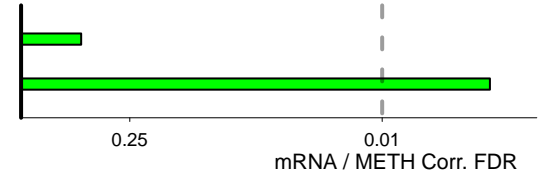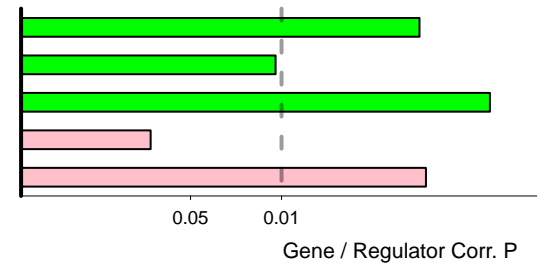

# FHL1

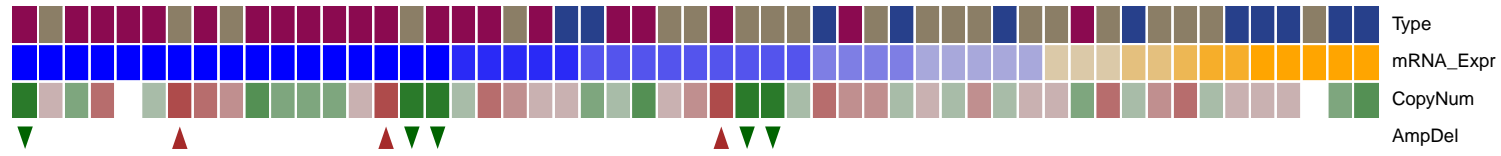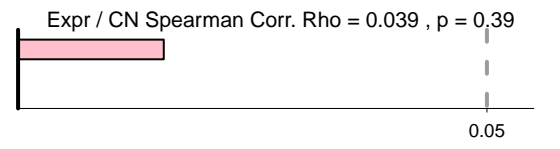

X : 135228207  
 X : 135228444  
 X : 135228853  
 X : 135228969  
 X : 135229045  
 X : 135229186  
 X : 135229382  
 X : 135229551  
 X : 135229755  
 X : 135230024  
 X : 135230594  
 X : 135230613  
 X : 135230696  
 X : 135230717  
 X : 135230841  
 X : 135232026  
 X : 135249966  
 X : 135250267  
 X : 135251416  
 X : 135251444  
 X : 135251484  
 X : 135251741  
 X : 135277616  
 X : 135278646  
 X : 135278915  
 X : 135278952  
 X : 135279018  
 X : 135291355  
 X : 135292566

GeneLoc  
 PromoterAssoc  
 CpGIsland

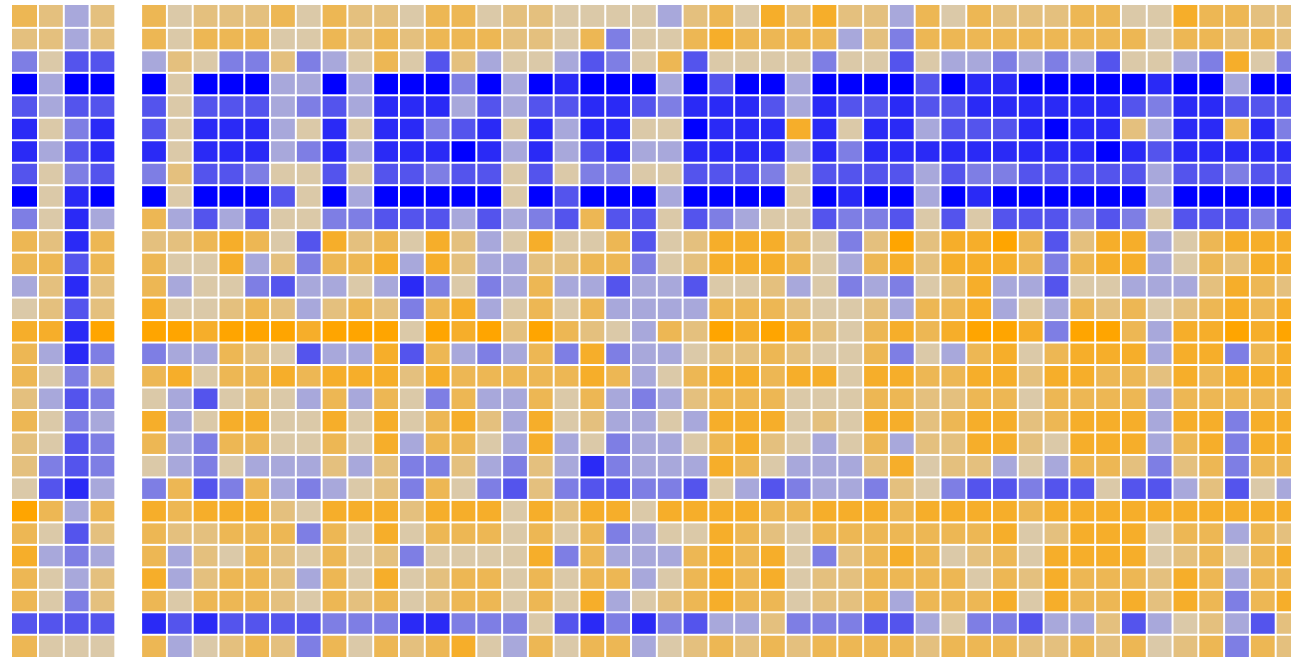

cg06068891  
 cg04778337  
 cg14506668  
 cg23124867  
 cg12623328  
 cg22053855  
 cg02285254  
 cg06521531  
 cg01742836  
 cg11906997  
 cg20999651  
 cg10208654  
 cg25445853  
 cg14295696  
 cg12057563  
 cg13980651  
 cg02811588  
 cg27384106  
 cg05555725  
 cg02193580  
 cg25883790  
 cg09167861  
 cg09809869  
 cg25289658  
 cg13503613  
 cg21374587  
 cg13100667  
 cg09209584  
 cg11799529

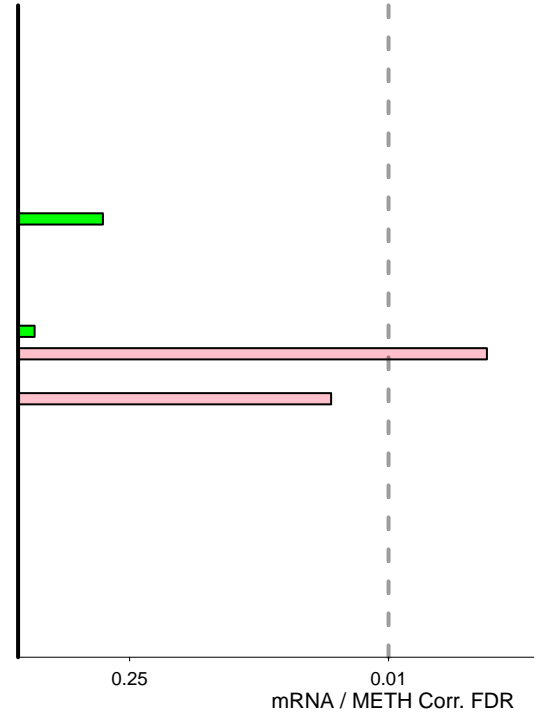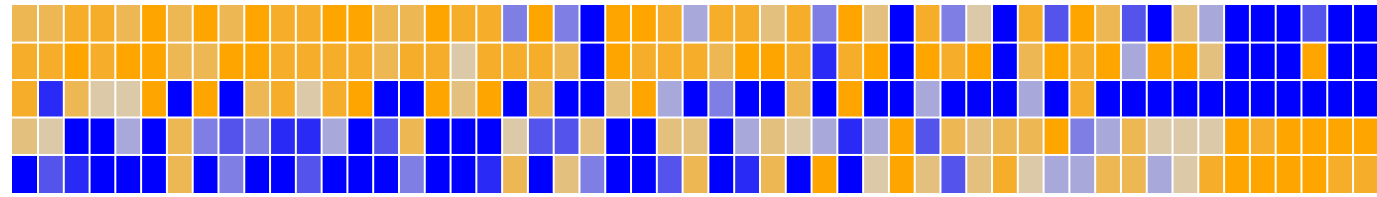

MITF  
 SOX10  
 TRPM1  
 ZEB1  
 AXL

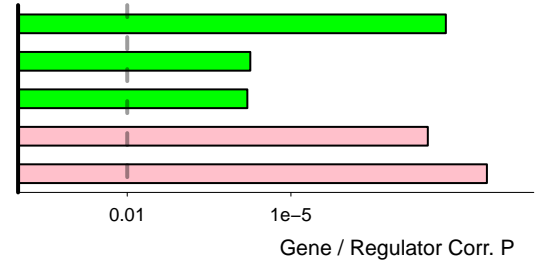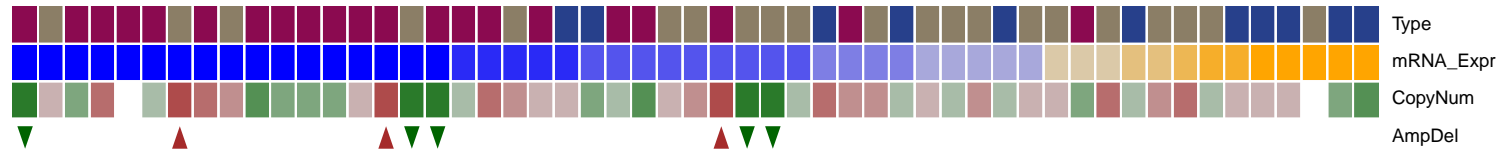

S2379  
 S2333  
 S2508  
 S2189  
 S2667  
 S2400  
 S2423  
 S2765  
 S2392  
 S2718  
 S2510  
 S2668  
 S2216  
 S2391  
 S2761  
 S2380  
 S2408  
 S2357  
 S2330  
 S2654  
 S2406  
 S2405  
 S2686  
 S2279  
 S2374  
 S2247  
 S2650  
 S2373  
 S2734  
 S2153  
 S2596  
 S2731  
 S2521  
 S2812  
 S2356  
 S2097  
 S2645  
 S2365  
 S2338  
 S2381  
 S2495  
 S2320  
 S2410  
 S2583  
 S2549  
 S2767  
 S2800  
 S2125  
 S2688  
 S2770A  
 S2350  
 S2261  
 S2470

Type  
 mRNA\_Expr  
 CopyNum  
 AmpDel



# DSE

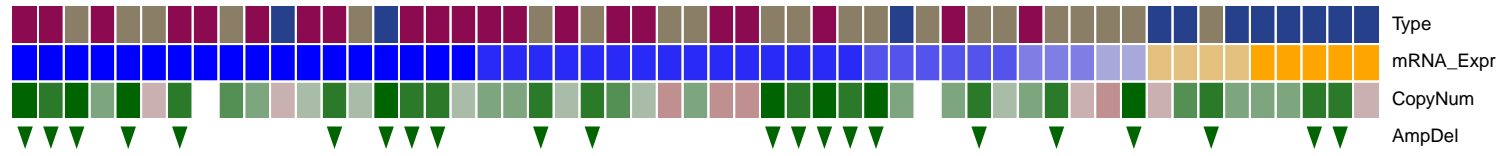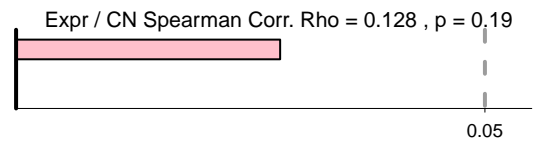

6 : 116575894  
6 : 116575913  
6 : 116576566  
6 : 116579888  
6 : 116580513  
6 : 116592422  
6 : 116598395  
6 : 116600143  
6 : 116600638  
6 : 116601282  
6 : 116601284  
6 : 116601663  
6 : 116602398  
6 : 116645836  
6 : 116674019  
6 : 116691382  
6 : 116691460  
6 : 116691685  
6 : 116691851  
6 : 116691863  
6 : 116692074  
6 : 116692265  
6 : 116692748  
6 : 116692844  
6 : 116692922  
6 : 116693156  
6 : 116698176  
6 : 116726398  
6 : 116726587  
6 : 116732515  
6 : 116736562  
6 : 116744279  
6 : 116745588  
6 : 116753994

GeneLoc  
PromoterAssoc  
CpIsland

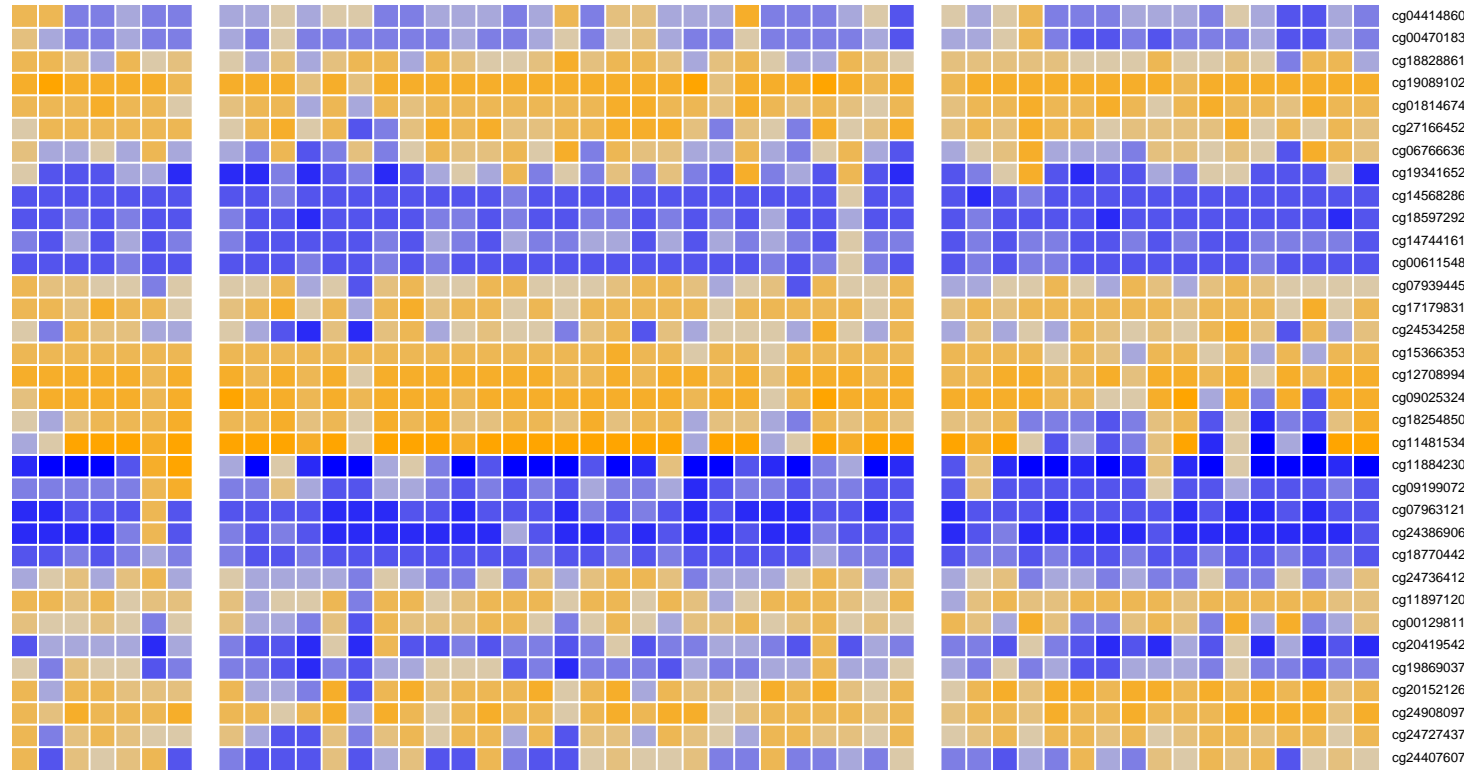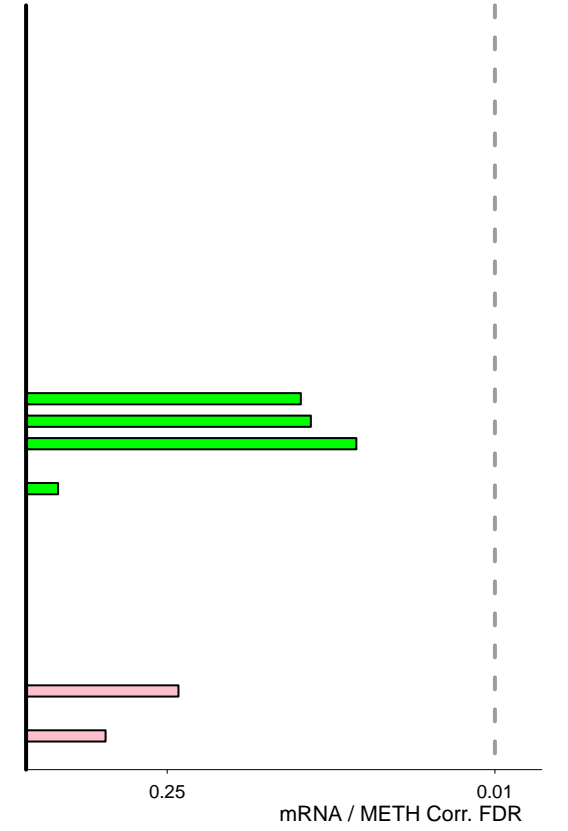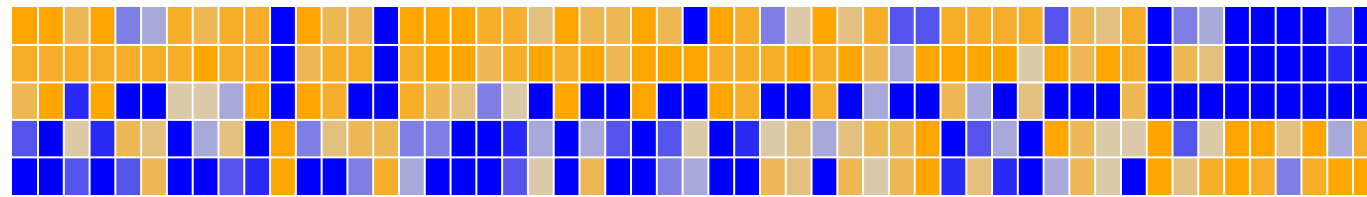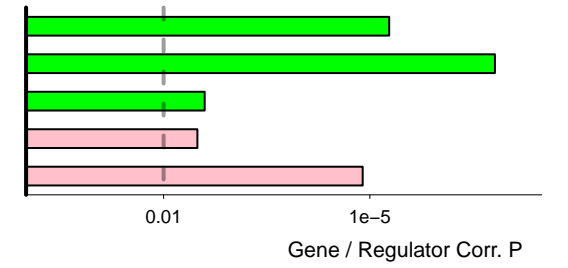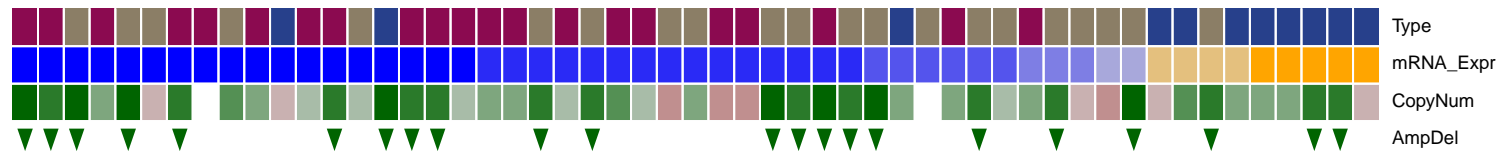

S2406  
S2391  
S2333  
S2521  
S2645  
S2650  
S2189  
S2667  
S2247  
S2330  
S2770A  
S2765  
S2379  
S2380  
S2338  
S2320  
S2718  
S2279  
S2373  
S2668  
S2812  
S2408  
S2410  
S2761  
S2400  
S2392  
S2549  
S2374  
S2510  
S2654  
S2365  
S2216  
S2153  
S2381  
S2583  
S2350  
S2508  
S2097  
S2734  
S2357  
S2495  
S2423  
S2767  
S2596  
S2125  
S2405  
S2800  
S2356  
S2261  
S2686  
S2470  
S2731  
S2688

# ESM1

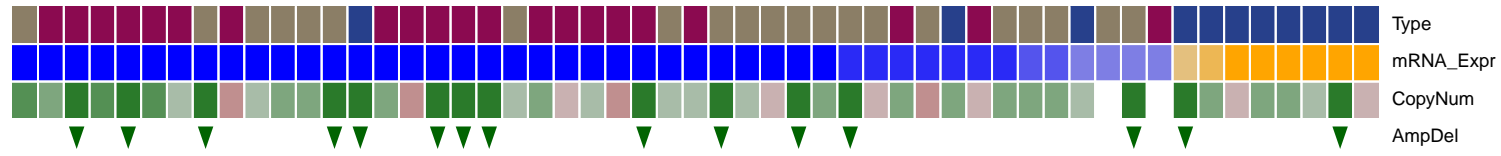

5 : 54319996  
 5 : 54319373  
 5 : 54300177  
 5 : 54287462  
 5 : 54283267  
 5 : 54282459  
 5 : 54281733  
 5 : 54281668  
 5 : 54281478  
 5 : 54281362  
 5 : 54281336  
 5 : 54281271  
 5 : 54281198  
 5 : 54275198  
 5 : 54275155

GeneLoc  
 PromoterAssoc  
 CpGIsland

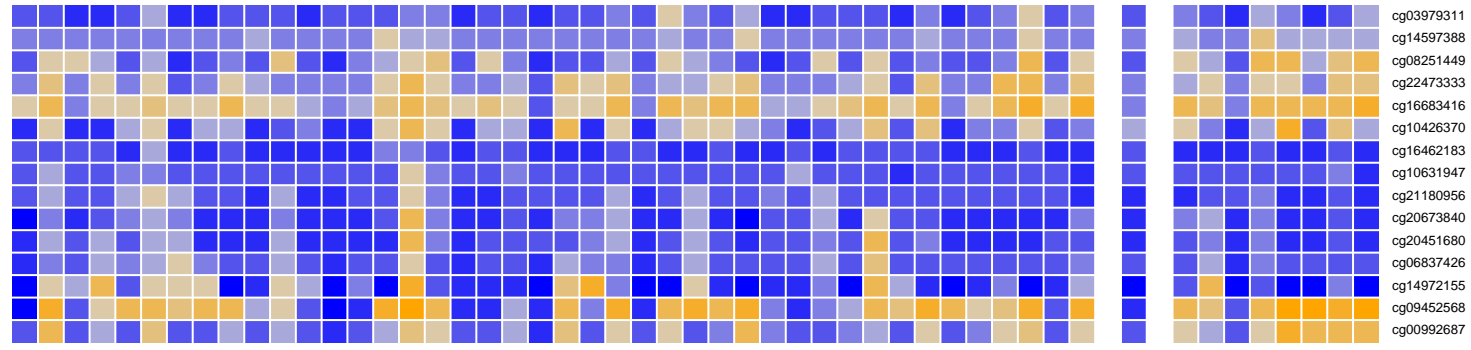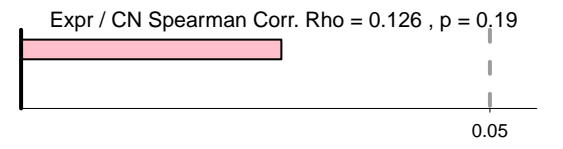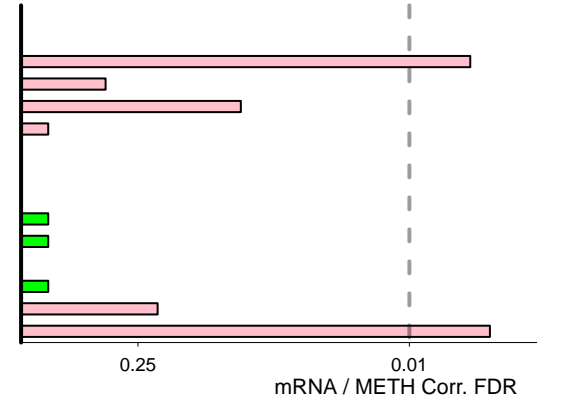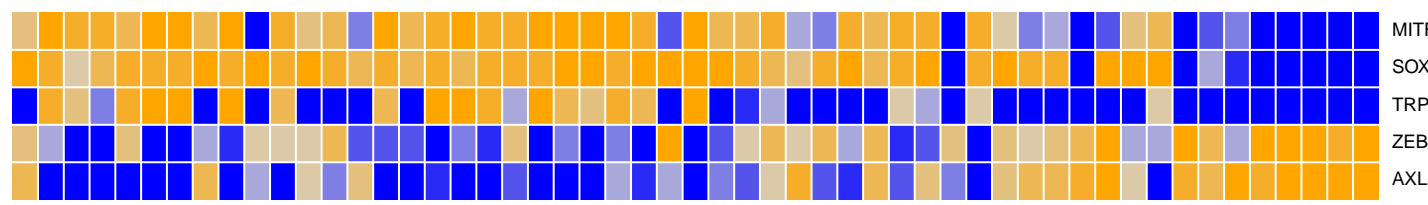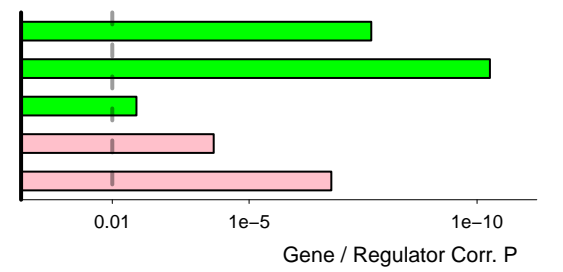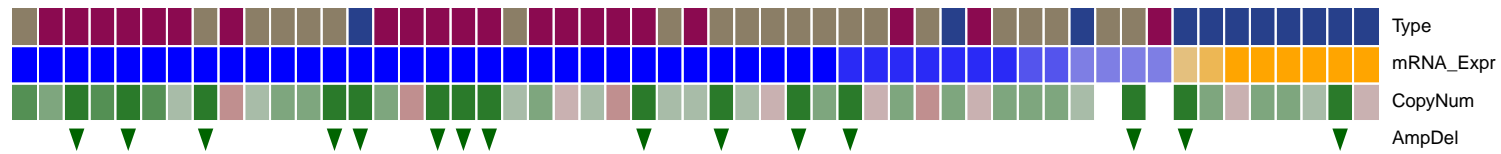

S2153  
 S2216  
 S2357  
 S2373  
 S2379  
 S2391  
 S2408  
 S2410  
 S2521  
 S2549  
 S2596  
 S2767  
 S2380  
 S2405  
 S2406  
 S2761  
 S2330  
 S2765  
 S2510  
 S2247  
 S2374  
 S2718  
 S2279  
 S2320  
 S2508  
 S2495  
 S2400  
 S2392  
 S2333  
 S2381  
 S2800  
 S2645  
 S2734  
 S2423  
 S2668  
 S2097  
 S2686  
 S2189  
 S2365  
 S2654  
 S2650  
 S2338  
 S2350  
 S2812  
 S2667  
 S2470  
 S2583  
 S2731  
 S2261  
 S2356  
 S2125  
 S2688  
 S2770A

# SERPINB7

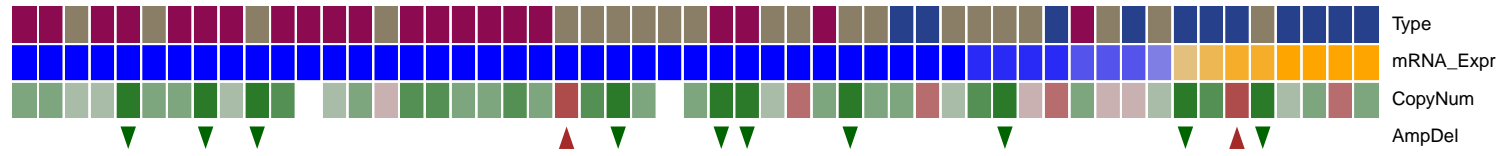

18:61419077  
 18:61419801  
 18:61420334  
 18:61441546  
 18:61441730  
 18:61443038  
 18:61455379  
 18:61472145

GeneLoc  
 PromoterAssoc  
 CpGIsland

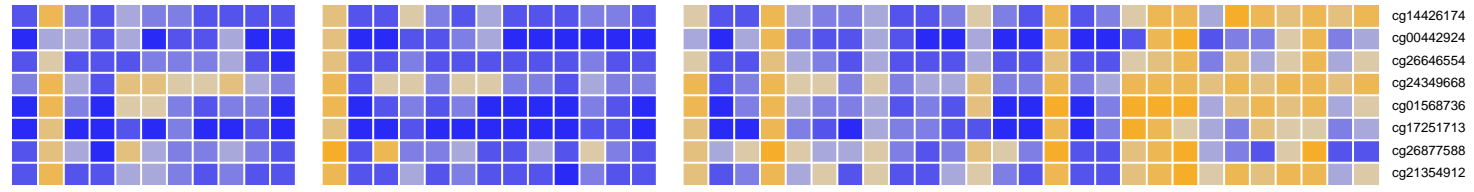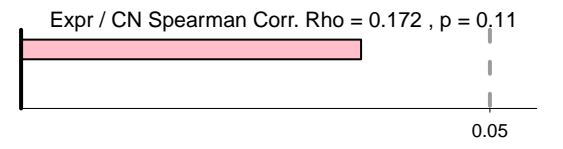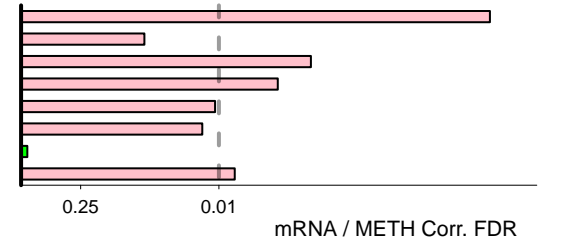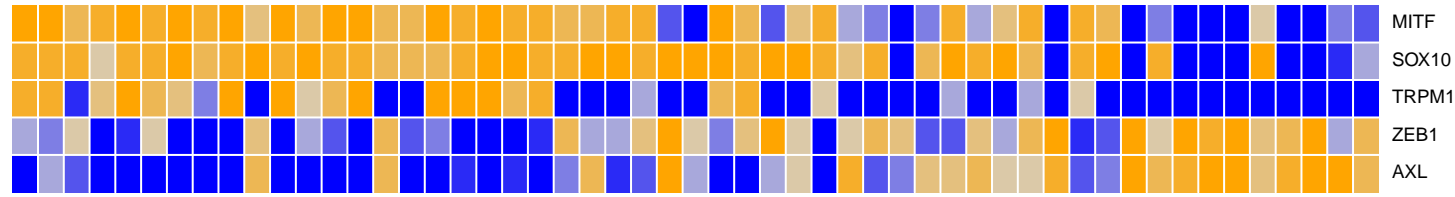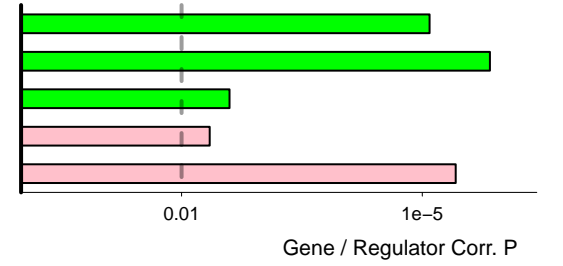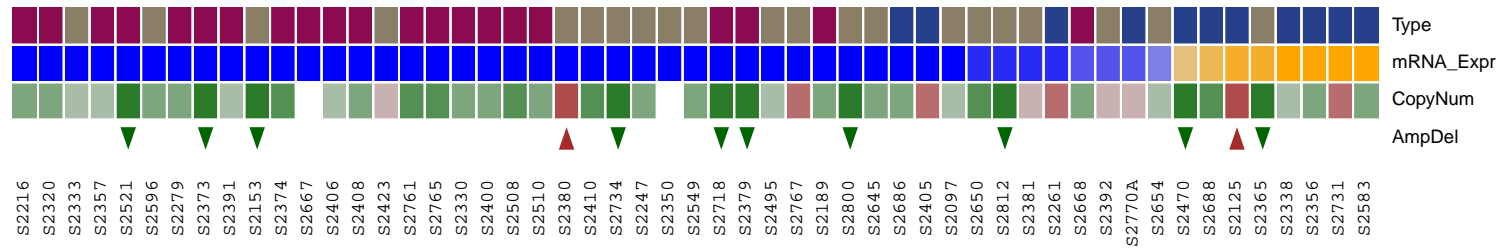

S2216  
 S2320  
 S2333  
 S2357  
 S2521  
 S2596  
 S2279  
 S2373  
 S2391  
 S2153  
 S2374  
 S2667  
 S2406  
 S2408  
 S2423  
 S2761  
 S2765  
 S2330  
 S2400  
 S2508  
 S2510  
 S2380  
 S2410  
 S2734  
 S2247  
 S2350  
 S2549  
 S2718  
 S2379  
 S2495  
 S2767  
 S2189  
 S2800  
 S2645  
 S2686  
 S2405  
 S2097  
 S2650  
 S2812  
 S2381  
 S2261  
 S2668  
 S2392  
 S2770A  
 S2654  
 S2470  
 S2688  
 S2125  
 S2365  
 S2338  
 S2356  
 S2731  
 S2583

# PLPP3

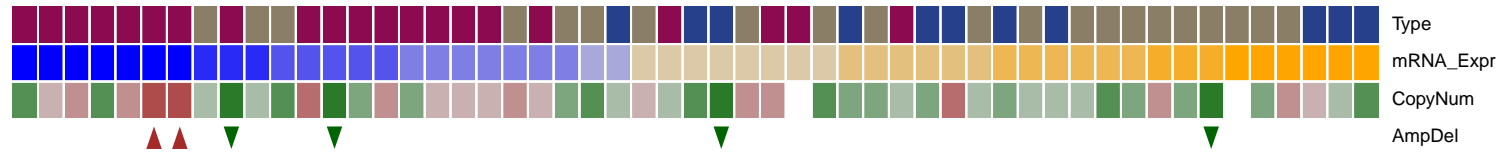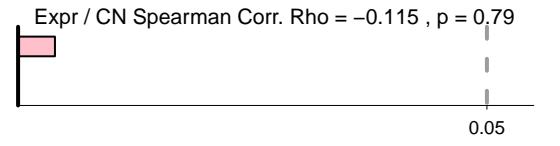

1:57111511  
1:57111499  
1:57111387  
1:57111199  
1:57111122  
1:57111117  
1:57111108  
1:57111099  
1:57110878  
1:57110870  
1:57110867  
1:57110724  
1:57110722  
1:57110403  
1:57107842  
1:57048634  
1:57045708  
1:57044824  
1:57044323  
1:57044267  
1:57043938  
1:57043571  
1:57040807  
1:57037591  
1:57029014  
1:57018645  
1:57015477  
1:57013771  
1:57011246  
1:57004017  
1:57001742  
1:56999296  
1:56996910  
1:56992372  
1:56983336  
1:56977724  
1:56976548  
1:56975583  
1:56973115  
1:56961319

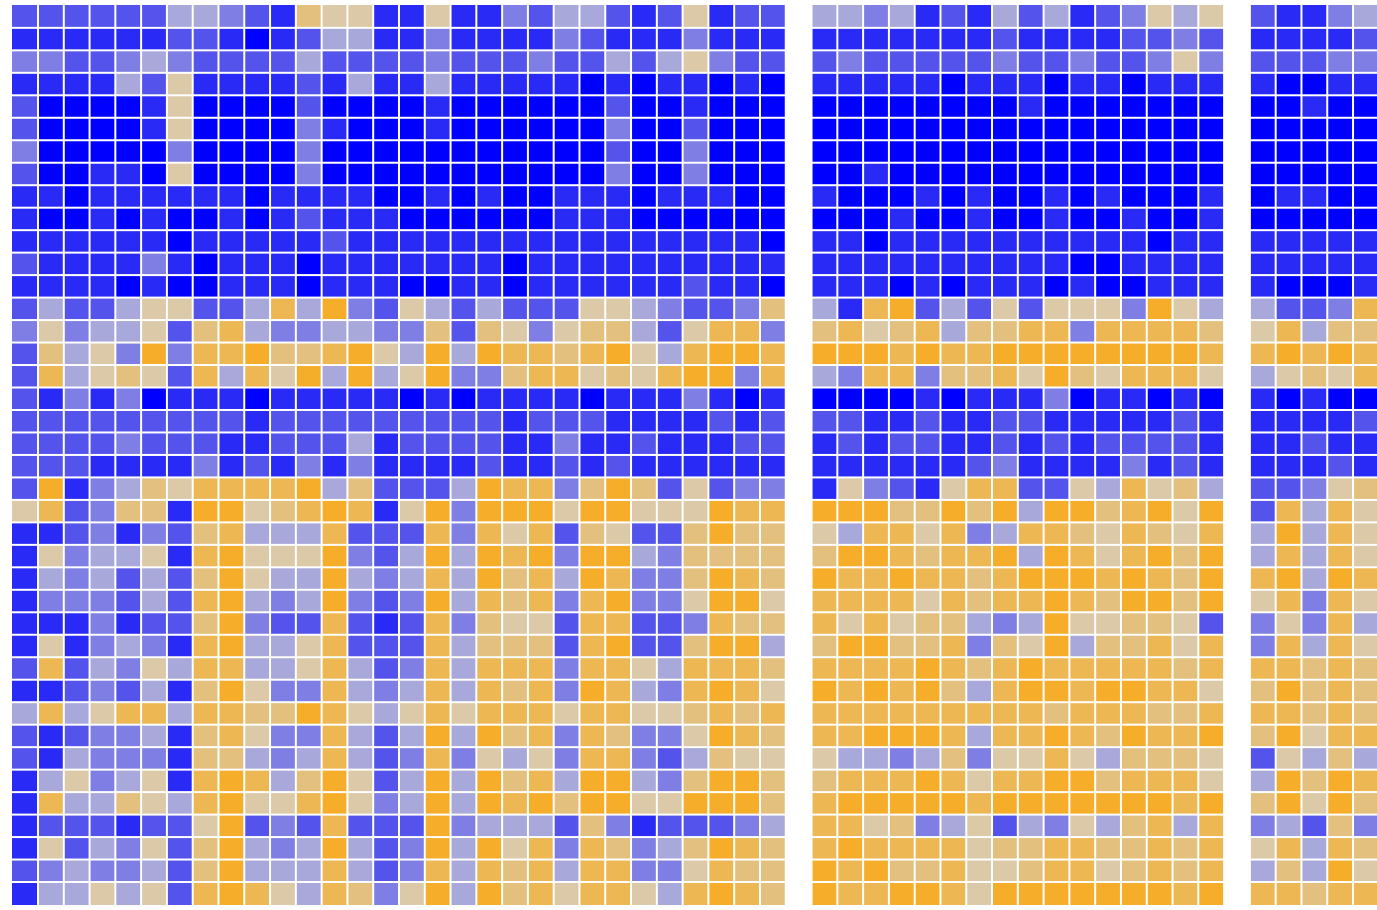

cg02361458  
cg05494069  
cg09313917  
cg09935045  
cg09686317  
cg26068551  
cg12167830  
cg04876835  
cg24277313  
cg05656934  
cg13892954  
cg19083779  
cg09763175  
cg06836772  
cg15501415  
cg19601745  
cg16505550  
cg19711007  
cg12084062  
cg01119523  
cg06535441  
cg02468627  
cg17902947  
cg13320211  
cg16738453  
cg16243606  
cg23723818  
cg22396959  
cg10500503  
cg00117825  
cg11959316  
cg11194132  
cg11851382  
cg11682697  
cg14374866  
cg20325850  
cg27398401  
cg12180551  
cg24606533  
cg07477602

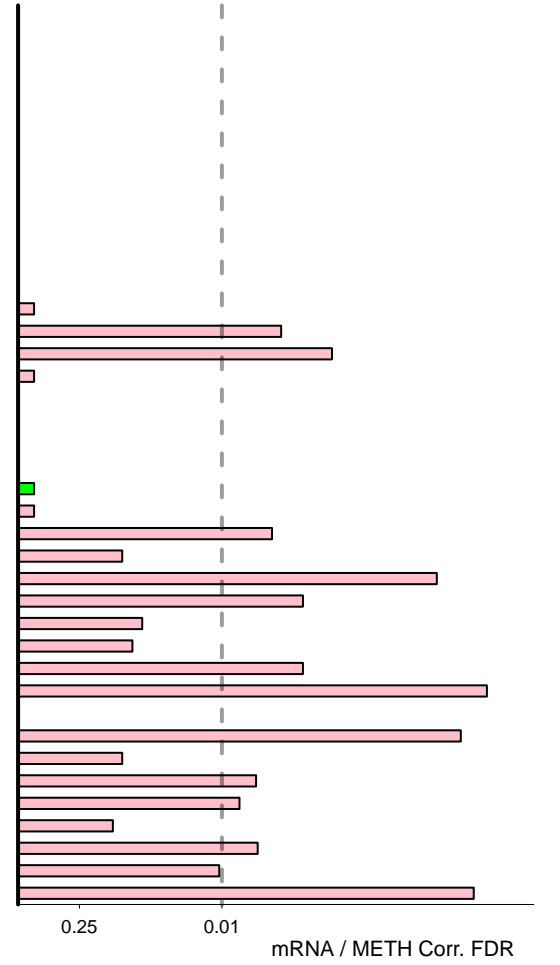

GeneLoc  
PromoterAssoc  
CpGIsland

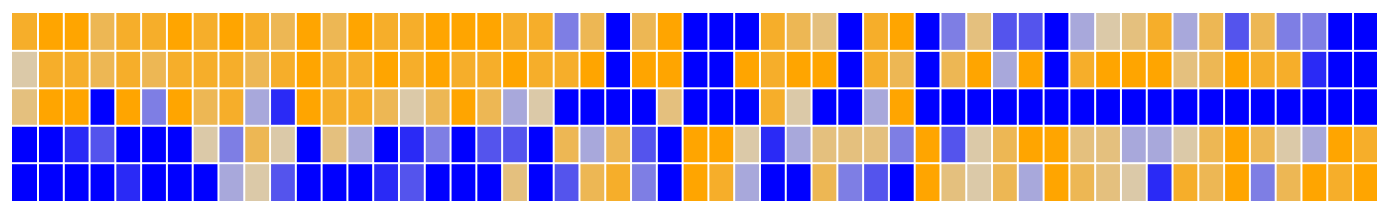

MITF  
SOX10  
TRPM1  
ZEB1  
AXL

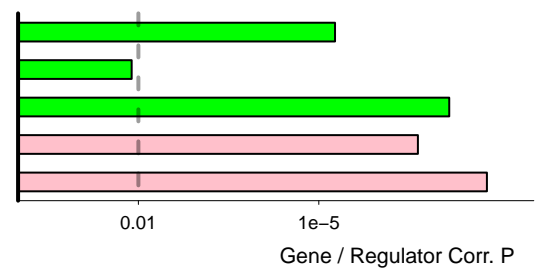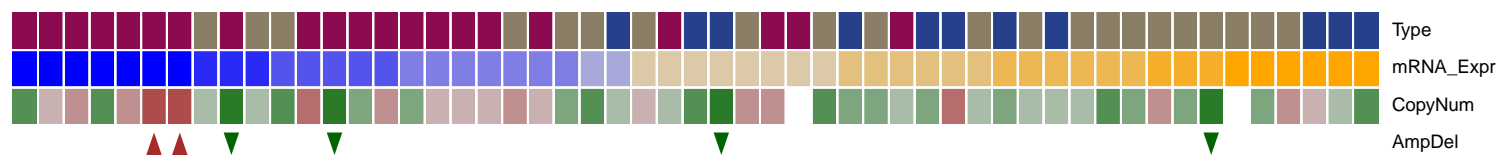

S2357  
S2391  
S2521  
S2761  
S2330  
S2373  
S2408  
S2596  
S2320  
S2381  
S2333  
S2400  
S2379  
S2216  
S2508  
S2668  
S2718  
S2374  
S2406  
S2097  
S2189  
S2645  
S2410  
S2338  
S2392  
S2279  
S2770A  
S2470  
S2549  
S2510  
S2667  
S2153  
S2686  
S2247  
S2765  
S2125  
S2405  
S2767  
S2583  
S2495  
S2356  
S2650  
S2365  
S2812  
S2734  
S2800  
S2423  
S2350  
S2380  
S2654  
S2731  
S2261  
S2688

# TGFBI

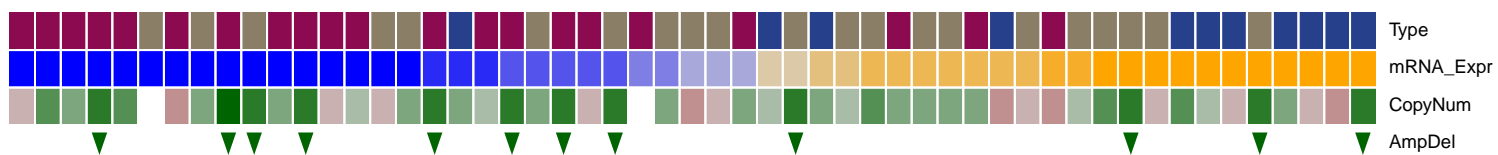

5:135363004  
5:135364060  
5:135364328  
5:135364349  
5:135364451  
5:135364552  
5:135364556  
5:135364568  
5:135364575  
5:135364580  
5:135364827  
5:135364970  
5:135364986  
5:135365012  
5:135365401  
5:135365890  
5:135367668  
5:135370288  
5:135377662  
5:135384080  
5:135389705  
5:135394043  
5:135398944

GeneLoc  
PromoterAssoc  
CpGIsland

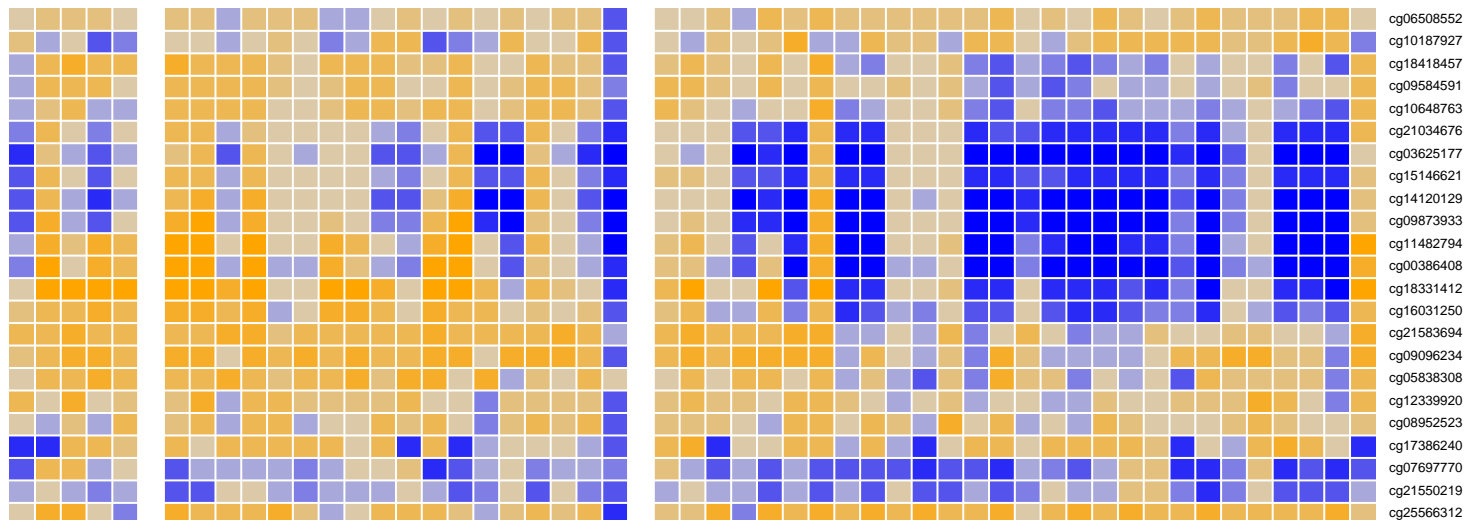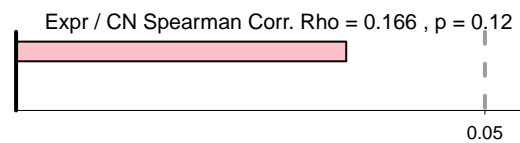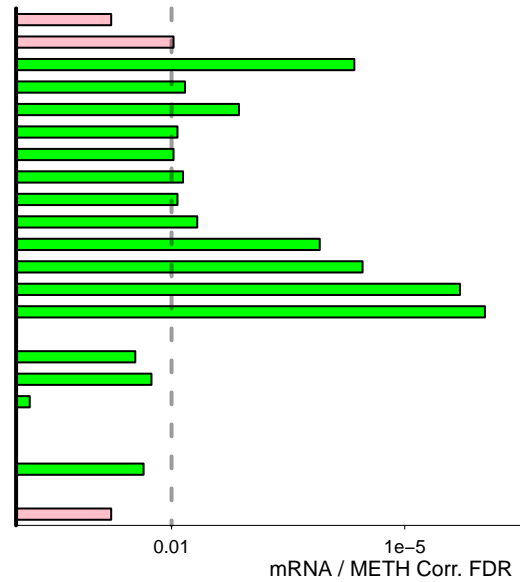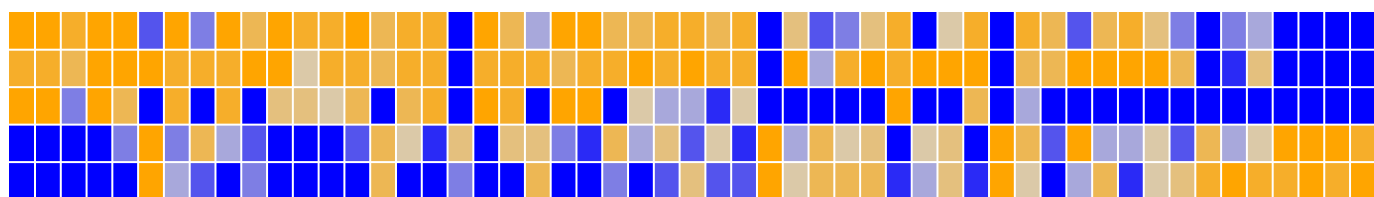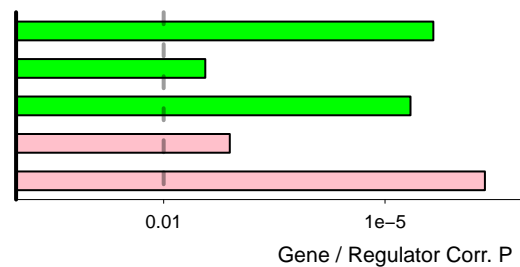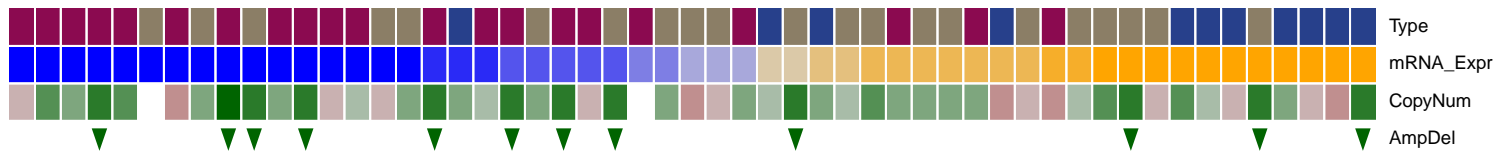

S2374  
S2391  
S2373  
S2400  
S2718  
S2350  
S2320  
S2645  
S2216  
S2392  
S2279  
S2357  
S2189  
S2406  
S2423  
S2596  
S2510  
S2686  
S2408  
S2379  
S2650  
S2765  
S2521  
S2380  
S2667  
S2247  
S2097  
S2333  
S2668  
S2356  
S2812  
S2583  
S2654  
S2153  
S2330  
S2549  
S2365  
S2508  
S2125  
S2381  
S2761  
S2495  
S2410  
S2734  
S2767  
S2405  
S2338  
S2731  
S2800  
S2261  
S2770A  
S2470  
S2688

Gene / Regulator Corr. P
